# Supplementary material for: Altered Developmental and Metabolic Gene Expression in Basil Interspecific Hybrids
Source: MDPI journal article supplement (doi:10.3390/plants11141873), 2022-07-18

## **Altered developmental and metabolic gene expression in Basil interspecific hybrids**

**Saumya Shah<sup>1</sup>, Shubhra Rastogi<sup>1</sup>, Divya Vashisth<sup>1</sup>, Prashant Kumar Rout<sup>2</sup>, Raj Kishori Lal<sup>3</sup>,**

**Umesh Chandra Lavania<sup>4</sup>, Ajit Kumar Shasany<sup>1,5\*</sup>**

<sup>1</sup>Biotechnology Division, CSIR-Central Institute of Medicinal and Aromatic Plants, Lucknow 226015, India

<sup>2</sup>Department of Phytochemistry, CSIR-Central Institute of Medicinal and Aromatic Plants, Lucknow 226015, India

<sup>3</sup>Department of Genetics and Plant breeding, CSIR-Central Institute of Medicinal and Aromatic Plants, Lucknow 226015, India

<sup>4</sup>Department of Botany, University of Lucknow, Lucknow 226007, India

<sup>5</sup>ICAR-National Institute for Plant Biotechnology (NIPB), Pusa Campus, New Delhi 110012, India

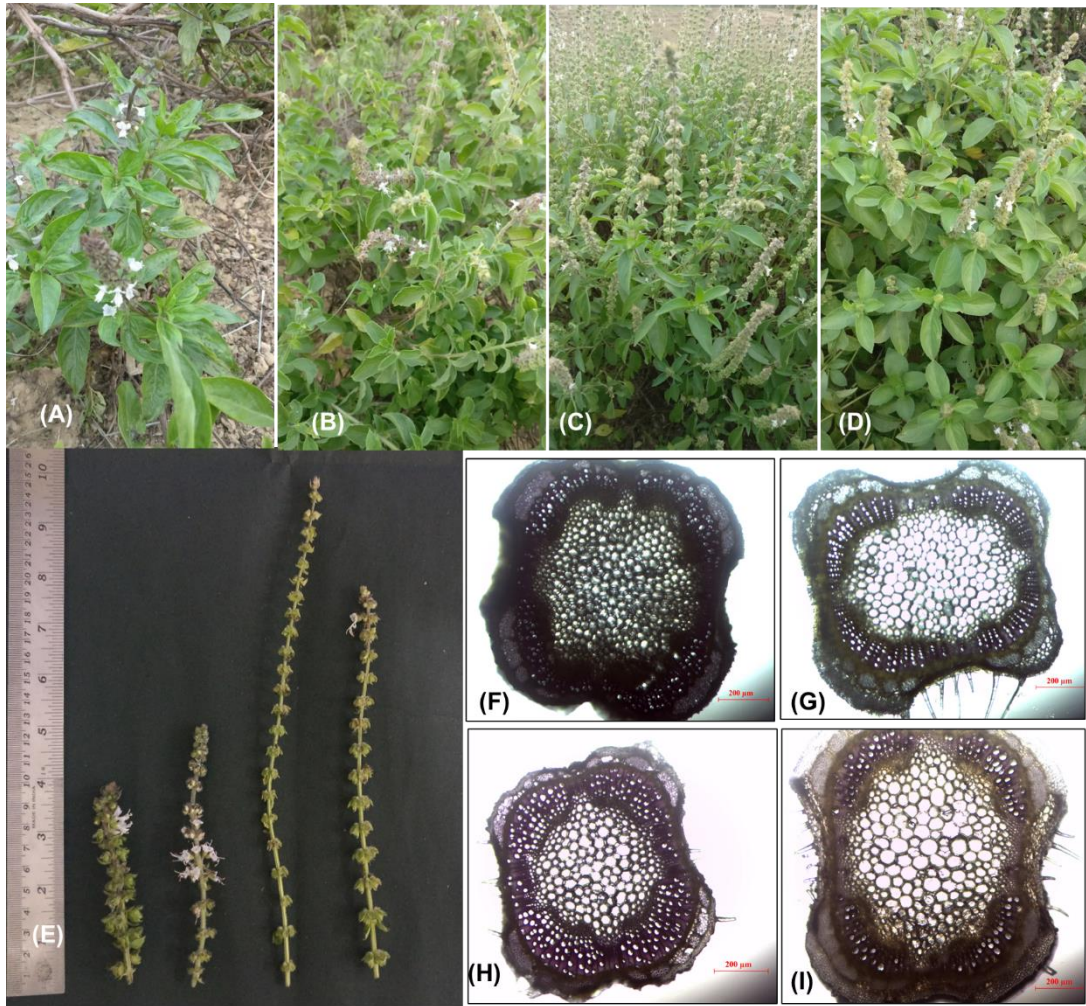

**Figure S1** A-D Parent 1 (*Ocimum basilicum* OBP1), Parent 2 (*Ocimum kilimandscharicum* OKP2), interspecific hybrid F1 and amphidiploid. (E) Inflorescence of Parent 1 (OBP1), Parent 2 (OKP2), interspecific hybrid F1 and amphidiploid. (F-I) Representation of stem diameter of Parent 1 (OBP1), Parent 2 (OKP2), interspecific hybrid F1 and amphidiploid.

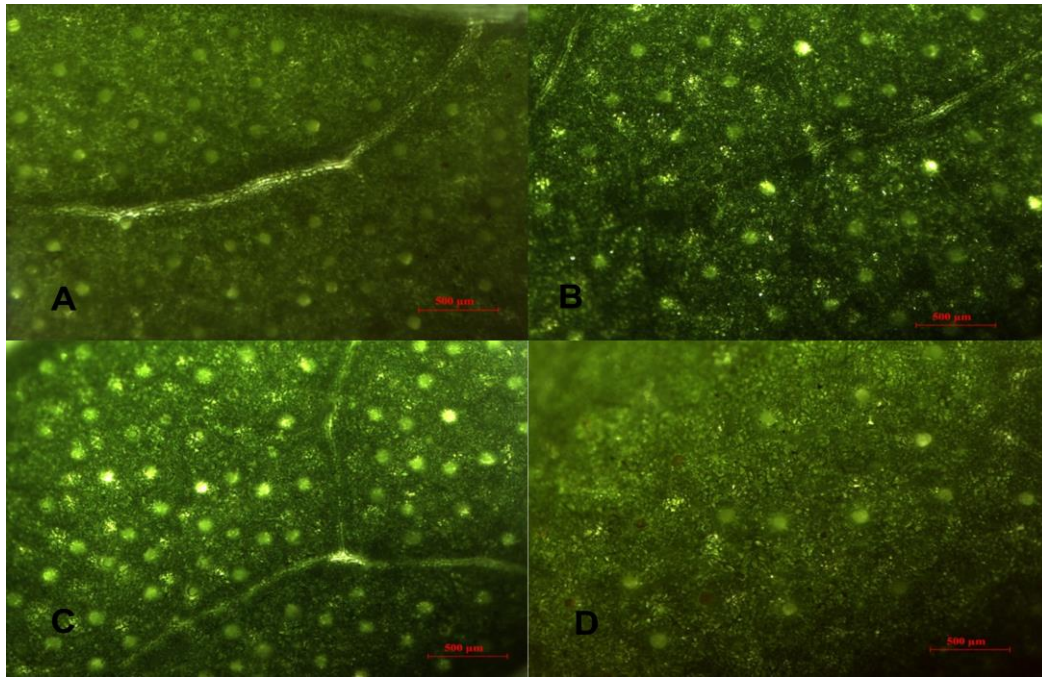

**Figure S2 A-D** Microscopic view showing trichome density of Parent 1 (OBP1), Parent 2 (OKP2), interspecific hybrid F1 and amphidiploid at 40X.

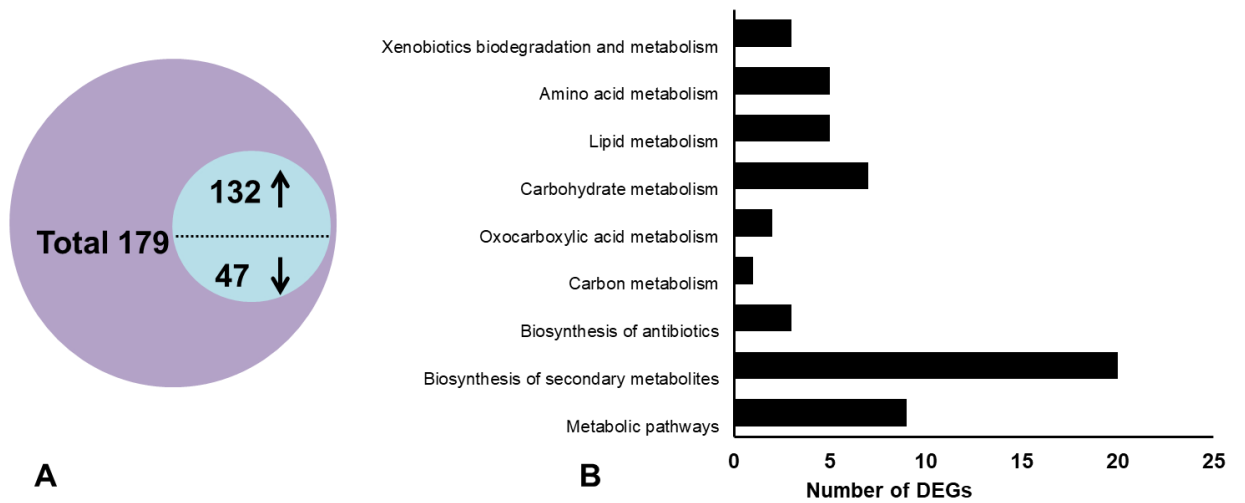

Supplement: s1 [file s1]
