# Supplementary material for: Altered Developmental and Metabolic Gene Expression in Basil Interspecific Hybrids
Source: Plants (Basel). 2022 Jul 18;11(14):1873. doi: 10.3390/plants11141873 (PMC9321874; doi:10.3390/plants11141873)
Supplement: Supplementary file 1 [file plants-11-01873-s001.zip]

Archive with 16 entries (16 files):
- Supplementary Plants.pdf
- Table S10_DGE_OBP1_vs_Amphid2.XLSX.xlsx
- Table S11_DGE_OKP2_vs_F1 .XLSX.xlsx
- Table S12_DGE_OKP2_vs_AMPHID2.XLSX.xlsx
- Table S13_DGE_F1_vs_AMPHID2.XLSX.xlsx
- Table S14_List of primers used in Real-Time PCR.xlsx
- Table S15_FPKM.xlsx
- Table S1_Assembly_Report.xlsx
- Table S2_Annotation Summary.xlsx
- Table S3_DEGs co-regulated.xlsx
- Table S4_Transcripts related to general phenylpropanoid biosynthetic pathway.xlsx
- Table S5_Transcripts related to chlorophyll metabolism.xlsx
- Table S6_Transcripts related to stomatal patterning and development genes.xlsx
- Table S7_transcription factor no..xlsx
- Table S8_DGE_OBP1_vs_OKP2.XLSX.xlsx
- Table S9_DGE_OBP1_vs_F1. XLSX.xlsx
