# Supplementary material for: Altered Developmental and Metabolic Gene Expression in Basil Interspecific Hybrids
Source: Plants (Basel). 2022 Jul 18;11(14):1873. doi: 10.3390/plants11141873 (PMC9321874; doi:10.3390/plants11141873)
Supplement: Supplementary file 1 [file plants-11-01873-s001.zip › Table S1_Assembly_Report.xlsx]

## Sheet: Sheet1
Raw Data Quality Statistics
File name	OBP1_1.fastq	OBP1_2.fastq	OKP2_1.fastq	OKP2_2.fastq	F1_1.fastq	F1_2.fastq	AMPHID2_1.fastq	AMPHID2_2.fastq
Minimum Read Length	101	101	101	101	101	101	101	101
Maximum Read Length	101	101	101	101	101	101	101	101
Average Read Length	101	101	101	101	101	101	101	101
Total no. of Reads	14857263	14857263	13017783	13017783	14266805	14266805	13955543	13955543
Total no. of Reads with non-ATGC bases	13201	109752	11798	96478	13217	106875	56923	66104
Percentage of Reads with non-ATGC bases	0.0009	0.0074	0.0009	0.0074	0.0009	0.0075	0.0041	0.0047
Total no. of bases	1500583563	1500583563	1314796083	1314796083	1440947305	1440947305	1409509843	1409509843
Total no. of HQ bases	1473468555	1455020295	1291665608	1276162272	1416447952	1398364089	1372333380	1356742473
Percentage of HQ bases	0.9819	0.9696	0.9824	0.9706	0.983	0.9704	0.9736	0.9626
Total no. of non-ATGC bases	24395	9573810	21886	8414537	24721	9315679	103703	976635
Percentage of non-ATGC bases	0	0.0064	0	0.0064	0	0.0065	0.0001	0.0007
High Quality Paired-End Filtered Data Quality Statistics
File name	OBP1_1.fastq_filtered	OBP1_2.fastq_filtered	OKP2_1.fastq_filtered	OKP2_2.fastq_filtered	F1_1.fastq_filtered	F1_2.fastq_filtered	AMPHID2_1.fastq_filtered	AMPHID2_2.fastq_filtered
Minimum Read Length	101	101	101	101	101	101	101	101
Maximum Read Length	101	101	101	101	101	101	101	101
Average Read Length	101	101	101	101	101	101	101	101
Total no. of HQ reads	14431491	14431491	12665614	12665614	13866646	13866646	13479705	13479705
Percentage HQ reads	0.9714	0.9714	0.973	0.973	0.972	0.972	0.9659	0.9659
Total no. of HQ Reads with non-ATGC bases	8741	10606	7787	9417	8707	10458	50329	53982
Percentage of HQ Reads with ATGC basesnon-ATGC bases	0.0006	0.0007	0.0006	0.0007	0.0006	0.0008	0.0037	0.004
Total no. of bases in HQ Reads	1457580591	1457580591	1279227014	1279227014	1400531246	1400531246	1361450205	1361450205
Total no. of HQ bases in HQ Reads	1437320230	1435001865	1261764356	1259831049	1382322028	1379597052	1334646724	1328293744
Percentage of HQ bases in HQ Reads	0.9861	0.9845	0.9863	0.9848	0.987	0.9851	0.9803	0.9756
Total no. of non-ATGC bases in HQ Reads	19408	102008	17445	90028	19670	99714	54735	238722
Percentage of non-ATGC bases in HQ Reads	0	0.0001	0	0.0001	0	0.0001	0	0.0002
Final Assembly
Parameter	Samples
	OBP1	OKP2	F1	Amphid2
Number of Final Transcripts	67770	73265	76917	76563
Final Transcriptome Length (bp)	52083230 (52Mb)	54963486( 54Mb)	58711321 (58Mb)	58573970 (58 Mb)
Minimum Transcript Length(bp)	224	224	224	224
Maximum Transcript Length(bp)	13196	13196	13196	13916
Average Transcript Length(bp)	768.53	750.2	763.31	765.04
N50	1042	996	1008	1009
(G+C)%	0.4504	0.4517	0.451	0.4517
