# Supplementary material for: Altered Developmental and Metabolic Gene Expression in Basil Interspecific Hybrids
Source: Plants (Basel). 2022 Jul 18;11(14):1873. doi: 10.3390/plants11141873 (PMC9321874; doi:10.3390/plants11141873)
Supplement: Supplementary file 1 [file plants-11-01873-s001.zip › Table S2_Annotation Summary.xlsx]

## Sheet: Summay
Paramter
Blast program	blastx
Blast Database	NRDB Plant
e value	<=0.001

## Sheet: AMPHID2
Transcript ID	Transcript length	E-Value	Similarity	Bit-Score	Blast Hit ID	Hit Description	Hit Organism	Family	Gene Ontology (Biological Process)	Gene Ontology (Molecular Function)	Gene Ontology (Cellular Component)	Pathway
TR35365|c1_g2_i3	1343	4.3572e-64	59	228.024	16064	Tam3-transposase	Antirrhinum majus	NA	NA	NA	NA	NA
TR35365|c1_g2_i6	1205	1.30766e-54	58	199.904	16064	Tam3-transposase	Antirrhinum majus	NA	NA	NA	NA	NA
TR41228|c1_g3_i2	1502	1.07571e-27	48	123.25	16064	Tam3-transposase	Antirrhinum majus	NA	NA	NA	NA	NA
TR39376|c0_g5_i4	509	1.22604e-13	77	75.0998	16064	Tam3-transposase	Antirrhinum majus	NA	NA	nucleic acid binding[GO:0003676]	NA	NA
TR2827|c0_g1_i2	1179	9.02518e-11	56	50.0618	16064	Tam3-transposase	Antirrhinum majus	NA	NA	NA	NA	NA
TR2827|c0_g1_i3	1215	9.43175e-11	56	50.0618	16064	Tam3-transposase	Antirrhinum majus	NA	NA	NA	NA	NA
TR35365|c0_g2_i2	460	3.33131e-09	72	61.2326	16064	Tam3-transposase	Antirrhinum majus	NA	NA	nucleic acid binding[GO:0003676]	NA	NA
TR35365|c0_g2_i1	236	1.22852e-08	71	57.3806	16064	Tam3-transposase	Antirrhinum majus	NA	NA	binding[GO:0005488]	NA	NA
TR32762|c0_g1_i1	654	1.64468e-110	99	327.791	19184	Type I (26 kD) CP29 polypeptide	Solanum lycopersicum	NA	photosynthesis, light harvesting[GO:0009765] ; protein-chromophore linkage[GO:0018298]	metal ion binding[GO:0046872] ; chlorophyll binding[GO:0016168]	photosystem II[GO:0009523] ; integral component of membrane[GO:0016021] ; chloroplast[GO:0009507] ; photosystem I[GO:0009522]	NA
TR32077|c0_g4_i1	240	2.75069e-19	100	81.2629	19614	histone H3 (AA 1-58)	Medicago sativa	NA	NA	protein heterodimerization activity[GO:0046982] ; DNA binding[GO:0003677]	nucleosome[GO:0000786] ; nucleus[GO:0005634]	NA
TR3414|c0_g3_i1	267	4.33143e-21	100	88.5817	115489	CALM2_PETHYRecName: Full=Calmodulin-2; Short=CaM-2	Petunia hybrida	NA	NA	calcium ion binding[GO:0005509]	NA	NA
TR36861|c1_g1_i1	363	3.72136e-15	100	76.6406	116391	CHSY_ANTMARecName: Full=Chalcone synthase; AltName: Full=Naringenin-chalcone synthase	Antirrhinum majus	NA	flavonoid biosynthetic process[GO:0009813]	naringenin-chalcone synthase activity[GO:0016210]	NA	map00941:Flavonoid biosynthesis(synthase[ec:2.3.1.74])
TR26397|c1_g2_i1	389	1.31678e-48	87	161.384	119931	FER1_PEARecName: Full=Ferredoxin-1, chloroplastic; AltName: Full=Ferredoxin I; Flags: Precursor	Pisum sativum	NA	electron transport chain[GO:0022900]	metal ion binding[GO:0046872] ; electron carrier activity[GO:0009055] ; 2 iron, 2 sulfur cluster binding[GO:0051537] ; protein binding[GO:0005515]	chloroplast[GO:0009507]	NA
TR34949|c1_g1_i1	341	5.77287e-68	97	219.164	170292	plasma membrane H+ ATPase, partial	Nicotiana plumbaginifolia	NA	metabolic process[GO:0008152]	ATP binding[GO:0005524] ; hydrolase activity[GO:0016787]	integral component of membrane[GO:0016021]	NA
TR38432|c0_g5_i1	281	4.78337e-60	98	188.348	217917	typical proliferating cell nuclear antigen	Daucus carota	NA	DNA replication[GO:0006260] ; regulation of DNA replication[GO:0006275]	DNA polymerase processivity factor activity[GO:0030337] ; DNA binding[GO:0003677]	nucleus[GO:0005634]	NA
TR41839|c1_g3_i2	334	1.54798e-67	100	221.09	300265	HSP68=68 kda heat-stress DnaK homolog	Lycopersicon peruvianum=tomatoes, Peptide Mitochondrial Partial, 580 aa	NA	NA	NA	NA	NA
TR27425|c0_g1_i2	1145	6.0976e-105	95	317.005	452357	guanine nucleotide regulatory protein	Vicia faba	NA	small GTPase mediated signal transduction[GO:0007264] ; protein transport[GO:0015031]	GTP binding[GO:0005525]	intracellular[GO:0005622]	NA
TR38750|c0_g2_i1	267	8.40823e-39	97	141.354	509163	cyprosin	Cynara cardunculus	NA	proteolysis[GO:0006508] ; lipid metabolic process[GO:0006629]	aspartic-type endopeptidase activity[GO:0004190]	NA	NA
TR2793|c0_g9_i1	291	7.50141e-30	98	112.079	544426	GRP1_DAUCARecName: Full=Glycine-rich RNA-binding protein	Daucus carota	NA	NA	nucleotide binding[GO:0000166] ; RNA binding[GO:0003723]	NA	NA
TR2793|c0_g7_i5	294	8.38758e-20	93	85.8853	544426	GRP1_DAUCARecName: Full=Glycine-rich RNA-binding protein	Daucus carota	NA	NA	nucleotide binding[GO:0000166] ; RNA binding[GO:0003723]	NA	NA
TR2793|c0_g4_i7	293	1.07903e-19	100	85.5001	544426	GRP1_DAUCARecName: Full=Glycine-rich RNA-binding protein	Daucus carota	NA	NA	nucleotide binding[GO:0000166] ; RNA binding[GO:0003723]	NA	NA
TR37309|c1_g2_i1	355	5.59602e-30	91	110.538	553048	V-type H+-ATPase, partial	Daucus carota	NA	ATP metabolic process[GO:0046034] ; ATP hydrolysis coupled proton transport[GO:0015991]	ATP binding[GO:0005524] ; proton-transporting ATPase activity, rotational mechanism[GO:0046961]	proton-transporting V-type ATPase, V1 domain[GO:0033180]	NA
TR43997|c0_g2_i1	825	3.71323e-136	98	399.053	553114	plasma membrane H+ ATPase, partial	Nicotiana plumbaginifolia	NA	ATP biosynthetic process[GO:0006754] ; hydrogen ion transmembrane transport[GO:1902600]	hydrogen-exporting ATPase activity, phosphorylative mechanism[GO:0008553] ; metal ion binding[GO:0046872] ; ATP binding[GO:0005524]	integral component of membrane[GO:0016021] ; plasma membrane[GO:0005886]	map00190:Oxidative phosphorylation(ATPase[ec:3.6.3.6])
TR23935|c0_g1_i1	659	1.74236e-110	99	331.257	553114	plasma membrane H+ ATPase, partial	Nicotiana plumbaginifolia	NA	ATP biosynthetic process[GO:0006754] ; hydrogen ion transmembrane transport[GO:1902600]	hydrogen-exporting ATPase activity, phosphorylative mechanism[GO:0008553] ; metal ion binding[GO:0046872] ; ATP binding[GO:0005524]	integral component of membrane[GO:0016021] ; plasma membrane[GO:0005886]	map00190:Oxidative phosphorylation(ATPase[ec:3.6.3.6])
TR34949|c1_g4_i4	435	7.31934e-95	98	288.115	553114	plasma membrane H+ ATPase, partial	Nicotiana plumbaginifolia	NA	ATP biosynthetic process[GO:0006754] ; hydrogen ion transmembrane transport[GO:1902600]	hydrogen-exporting ATPase activity, phosphorylative mechanism[GO:0008553] ; metal ion binding[GO:0046872] ; ATP binding[GO:0005524]	integral component of membrane[GO:0016021] ; plasma membrane[GO:0005886]	map00190:Oxidative phosphorylation(ATPase[ec:3.6.3.6])
TR42436|c0_g3_i2	242	5.8603e-50	98	160.999	575359	calreticulin	Parthenium argentatum	NA	protein folding[GO:0006457]	unfolded protein binding[GO:0051082] ; calcium ion binding[GO:0005509]	endoplasmic reticulum[GO:0005783]	NA
TR38766|c0_g1_i2	886	8.60711e-180	96	511.146	575942	stearoyl-acyl carrier protein desaturase	Sesamum indicum	NA	fatty acid biosynthetic process[GO:0006633] ; oxidation-reduction process[GO:0055114]	acyl-[acyl-carrier-protein] desaturase activity[GO:0045300]	chloroplast[GO:0009507]	map01040:Biosynthesis of unsaturated fatty acids(9-desaturase[ec:1.14.19.2]) ; map00061:Fatty acid biosynthesis(9-desaturase[ec:1.14.19.2])
TR30057|c0_g2_i1	302	6.36442e-62	99	196.052	623586	putative	Nicotiana tabacum	NA	small GTPase mediated signal transduction[GO:0007264] ; protein transport[GO:0015031]	GTP binding[GO:0005525]	intracellular[GO:0005622]	NA
TR43738|c0_g9_i1	590	1.44817e-132	97	382.489	693759	SecA homolog	Pisum sativum=peas, Peptide Chloroplast Partial, 276 aa	NA	protein import[GO:0017038] ; protein targeting[GO:0006605]	ATP binding[GO:0005524]	intracellular[GO:0005622] ; membrane[GO:0016020]	NA
TR43738|c0_g10_i1	290	8.03636e-58	97	187.578	693759	SecA homolog	Pisum sativum=peas, Peptide Chloroplast Partial, 276 aa	NA	protein import[GO:0017038] ; protein targeting[GO:0006605]	ATP binding[GO:0005524]	intracellular[GO:0005622] ; membrane[GO:0016020]	NA
TR43326|c0_g11_i1	236	2.99319e-13	100	68.5514	729617	BIP1_TOBACRecName: Full=Luminal-binding protein 1; Short=BiP 1; AltName: Full=78 kDa glucose-regulated protein homolog 1; Short=GRP-78-1	Nicotiana tabacum	NA	NA	ATP binding[GO:0005524]	endoplasmic reticulum lumen[GO:0005788]	NA
TR43326|c0_g1_i1	449	1.11604e-97	98	292.352	729624	BIP8_TOBACRecName: Full=Luminal-binding protein 8; Short=BiP 8; AltName: Full=78 kDa glucose-regulated protein homolog 8; Short=GRP-78-8	Nicotiana tabacum	NA	NA	ATP binding[GO:0005524]	endoplasmic reticulum lumen[GO:0005788]	NA
TR39848|c0_g1_i1	409	8.40336e-42	100	141.739	732576	SAM-synthetase	Cicer arietinum	NA	S-adenosylmethionine biosynthetic process[GO:0006556]	methionine adenosyltransferase activity[GO:0004478] ; ATP binding[GO:0005524]	NA	map00270:Cysteine and methionine metabolism(adenosyltransferase[ec:2.5.1.6])
TR40510|c1_g7_i1	433	8.35098e-72	97	221.861	736721	stearoyl-acyl carrier protein desaturse	Sesamum indicum	NA	fatty acid biosynthetic process[GO:0006633] ; oxidation-reduction process[GO:0055114]	acyl-[acyl-carrier-protein] desaturase activity[GO:0045300]	chloroplast[GO:0009507]	map01040:Biosynthesis of unsaturated fatty acids(9-desaturase[ec:1.14.19.2]) ; map00061:Fatty acid biosynthesis(9-desaturase[ec:1.14.19.2])
TR3713|c4_g2_i1	316	5.40189e-63	98	197.593	736721	stearoyl-acyl carrier protein desaturse	Sesamum indicum	NA	fatty acid biosynthetic process[GO:0006633] ; oxidation-reduction process[GO:0055114]	acyl-[acyl-carrier-protein] desaturase activity[GO:0045300]	chloroplast[GO:0009507]	map01040:Biosynthesis of unsaturated fatty acids(9-desaturase[ec:1.14.19.2]) ; map00061:Fatty acid biosynthesis(9-desaturase[ec:1.14.19.2])
TR40510|c1_g7_i2	373	4.73731e-26	94	103.219	736721	stearoyl-acyl carrier protein desaturse	Sesamum indicum	NA	fatty acid biosynthetic process[GO:0006633] ; oxidation-reduction process[GO:0055114]	acyl-[acyl-carrier-protein] desaturase activity[GO:0045300]	chloroplast[GO:0009507]	map01040:Biosynthesis of unsaturated fatty acids(9-desaturase[ec:1.14.19.2]) ; map00061:Fatty acid biosynthesis(9-desaturase[ec:1.14.19.2])
TR39848|c0_g6_i1	266	7.13417e-43	98	144.436	863000	S-adenosyl-L-methionine synthetase, partial	Populus deltoides	NA	S-adenosylmethionine biosynthetic process[GO:0006556]	methionine adenosyltransferase activity[GO:0004478] ; ATP binding[GO:0005524]	NA	map00270:Cysteine and methionine metabolism(adenosyltransferase[ec:2.5.1.6])
TR19971|c0_g3_i1	286	2.99327e-34	100	121.324	899115	polyubiquitin, partial	Solanum tuberosum	NA	NA	NA	NA	NA
TR27909|c0_g1_i4	404	4.45672e-20	77	86.2705	899115	polyubiquitin, partial	Solanum tuberosum	NA	NA	NA	NA	NA
TR34256|c0_g6_i1	296	2.75163e-60	98	192.971	940383	GTP cyclohydrolase II	Arabidopsis thaliana	NA	NA	NA	NA	NA
TR25987|c0_g4_i1	252	8.71283e-44	95	145.206	971282	ribosomal protein L9	Oryza sativa Japonica Group	NA	cytoplasmic translation[GO:0002181]	structural constituent of ribosome[GO:0003735] ; rRNA binding[GO:0019843]	cytosolic large ribosomal subunit[GO:0022625]	NA
TR43347|c2_g3_i2	584	5.794e-137	99	395.586	1041768	V-ATPase 66 kDa subunit, partial	Acer pseudoplatanus	NA	NA	ATP binding[GO:0005524]	NA	NA
TR30848|c1_g1_i3	253	7.80177e-38	100	130.954	1053045	histone H3, partial	Glycine max	NA	NA	protein heterodimerization activity[GO:0046982] ; DNA binding[GO:0003677]	nucleosome[GO:0000786] ; nucleus[GO:0005634]	NA
TR30848|c1_g5_i3	342	1.03006e-76	100	231.491	1053047	histone H3, partial	Glycine max	NA	NA	protein heterodimerization activity[GO:0046982] ; DNA binding[GO:0003677]	nucleosome[GO:0000786] ; nucleus[GO:0005634]	NA
TR41296|c1_g1_i3	725	2.48995e-146	94	422.935	1061420	p-type H+-ATPase, partial	Vicia faba	NA	metabolic process[GO:0008152]	ATP binding[GO:0005524] ; hydrolase activity[GO:0016787]	integral component of membrane[GO:0016021]	NA
TR12691|c0_g1_i1	235	1.04115e-48	98	158.688	1076678	S42643ubiquitin / ribosomal protein S27a - potato (fragment)	potato	NA	NA	NA	NA	NA
TR2214|c3_g4_i1	251	1.10712e-47	100	155.992	1076678	S42643ubiquitin / ribosomal protein S27a - potato (fragment)	potato	NA	NA	NA	NA	NA
TR16651|c0_g1_i1	275	1.06274e-45	98	151.369	1076678	S42643ubiquitin / ribosomal protein S27a - potato (fragment)	potato	NA	NA	NA	NA	NA
TR37305|c0_g3_i3	461	1.56301e-99	96	298.516	1161573	enolase	Solanum lycopersicum	NA	glycolytic process[GO:0006096]	magnesium ion binding[GO:0000287] ; phosphopyruvate hydratase activity[GO:0004634]	phosphopyruvate hydratase complex[GO:0000015]	map01130:Biosynthesis of antibiotics(hydratase[ec:4.2.1.11]) ; map00010:Glycolysis / Gluconeogenesis(hydratase[ec:4.2.1.11]) ; map00680:Methane metabolism(hydratase[ec:4.2.1.11])
TR43594|c1_g7_i2	383	1.18904e-82	99	256.144	1170507	IF4A3_NICPLRecName: Full=Eukaryotic initiation factor 4A-3; Short=eIF-4A-3; AltName: Full=ATP-dependent RNA helicase eIF4A-3	Nicotiana plumbaginifolia	NA	translational initiation[GO:0006413]	helicase activity[GO:0004386] ; ATP binding[GO:0005524] ; translation initiation factor activity[GO:0003743]	NA	NA
TR46303|c0_g1_i1	921	4.77201e-20	49	93.2041	1170749	LEC_BOWMIRecName: Full=Lectin; AltName: Full=Agglutinin; AltName: Full=BMA; Contains: RecName: Full=Lectin beta chain; Contains: RecName: Full=Lectin alpha chain	Leucomphalos mildbraedii	NA	NA	NA	NA	NA
TR30647|c2_g2_i6	321	2.48853e-27	69	112.849	1184075	Cf-2.1	Solanum pimpinellifolium	NA	NA	NA	NA	NA
TR42805|c1_g6_i4	326	2.19333e-71	99	218.009	1296312	p34 kinase, partial	Solanum tuberosum	NA	protein phosphorylation[GO:0006468]	ATP binding[GO:0005524] ; protein serine/threonine kinase activity[GO:0004674]	NA	NA
TR36618|c0_g1_i2	295	1.04418e-29	93	109.383	1297363	alcohol dehydrogenase 2c	Gossypium hirsutum	NA	oxidation-reduction process[GO:0055114]	zinc ion binding[GO:0008270] ; alcohol dehydrogenase (NAD) activity[GO:0004022]	NA	map00260:Glycine, serine and threonine metabolism(dehydrogenase[ec:1.1.1.1]) ; map00071:Fatty acid degradation(dehydrogenase[ec:1.1.1.1]) ; map00350:Tyrosine metabolism(dehydrogenase[ec:1.1.1.1]) ; map01130:Biosynthesis of antibiotics(dehydrogenase[ec:1.1.1.1]) ; map00982:Drug metabolism - cytochrome P450(dehydrogenase[ec:1.1.1.1]) ; map00980:Metabolism of xenobiotics by cytochrome P450(dehydroge…
TR42805|c1_g6_i2	407	2.00641e-71	100	224.942	1321672	cyclin-dependent kinase	Antirrhinum majus	NA	mitotic nuclear division[GO:0007067] ; regulation of cell cycle[GO:0051726] ; protein phosphorylation[GO:0006468] ; cell division[GO:0051301]	cyclin-dependent protein serine/threonine kinase activity[GO:0004693] ; RNA polymerase II carboxy-terminal domain kinase activity[GO:0008353] ; ATP binding[GO:0005524]	NA	NA
TR38406|c3_g1_i2	1185	0	100	551.592	1531674	actin	Striga asiatica	NA	NA	ATP binding[GO:0005524]	NA	NA
TR35024|c0_g8_i4	596	2.68448e-60	98	195.667	1568639	Cu/Zn superoxide dismutase	Triticum aestivum	NA	cellular response to high light intensity[GO:0071486] ; removal of superoxide radicals[GO:0019430] ; oxidation-reduction process[GO:0055114]	metal ion binding[GO:0046872] ; superoxide dismutase activity[GO:0004784]	chloroplast[GO:0009507]	NA
TR31737|c0_g1_i1	275	7.23575e-27	90	106.686	1657948	MipC	Mesembryanthemum crystallinum	NA	transport[GO:0006810]	transporter activity[GO:0005215]	integral component of membrane[GO:0016021]	NA
TR7973|c0_g6_i2	1131	0	92	639.032	1754795	omega-3 fatty acid desaturase	Perilla frutescens	Lamiaceae	oxidation-reduction process[GO:0055114] ; lipid metabolic process[GO:0006629]	oxidoreductase activity, acting on paired donors, with oxidation of a pair of donors resulting in the reduction of molecular oxygen to two molecules of water[GO:0016717]	integral component of membrane[GO:0016021]	NA
TR7973|c0_g6_i4	1219	7.95612e-178	90	328.176	1754795	omega-3 fatty acid desaturase	Perilla frutescens	Lamiaceae	oxidation-reduction process[GO:0055114] ; lipid metabolic process[GO:0006629]	oxidoreductase activity, acting on paired donors, with oxidation of a pair of donors resulting in the reduction of molecular oxygen to two molecules of water[GO:0016717]	integral component of membrane[GO:0016021]	NA
TR2514|c1_g9_i3	629	1.02729e-49	86	169.859	1781299	transformer-SR ribonucleoprotein	Nicotiana tabacum	NA	NA	nucleic acid binding[GO:0003676] ; nucleotide binding[GO:0000166]	viral nucleocapsid[GO:0019013] ; intracellular ribonucleoprotein complex[GO:0030529]	NA
TR42642|c1_g1_i3	332	9.80038e-73	99	223.016	1841462	Elongation factor 2	Nicotiana tabacum	NA	translational elongation[GO:0006414]	translation elongation factor activity[GO:0003746] ; GTP binding[GO:0005525]	NA	NA
TR36793|c2_g1_i1	302	3.40349e-65	100	210.305	1841468	Tyrosyl-tRNA synthetase	Nicotiana tabacum	NA	tRNA aminoacylation for protein translation[GO:0006418]	ATP binding[GO:0005524] ; tyrosine-tRNA ligase activity[GO:0004831]	NA	map00970:Aminoacyl-tRNA biosynthesis(ligase[ec:6.1.1.1])
TR34258|c1_g3_i3	794	2.19768e-123	96	359.762	1922272	isocitrate dehydrogenase (NADP+)	Eucalyptus globulus subsp. bicostata	NA	isocitrate metabolic process[GO:0006102] ; oxidation-reduction process[GO:0055114]	NAD binding[GO:0051287] ; isocitrate dehydrogenase (NADP+) activity[GO:0004450] ; magnesium ion binding[GO:0000287]	NA	map00480:Glutathione metabolism(dehydrogenase (NADP+)[ec:1.1.1.42]) ; map01130:Biosynthesis of antibiotics(dehydrogenase (NADP+)[ec:1.1.1.42]) ; map00720:Carbon fixation pathways in prokaryotes(dehydrogenase (NADP+)[ec:1.1.1.42]) ; map00020:Citrate cycle (TCA cycle)(dehydrogenase (NADP+)[ec:1.1.1.42])
TR39409|c0_g1_i3	1587	0	85	686.026	1944201	flavonoid 3-O-glucosyltransferase	Perilla frutescens	Lamiaceae	metabolic process[GO:0008152]	transferase activity, transferring hexosyl groups[GO:0016758]	NA	NA
TR39409|c0_g2_i1	721	2.1107e-100	79	308.531	1944201	flavonoid 3-O-glucosyltransferase	Perilla frutescens	Lamiaceae	metabolic process[GO:0008152]	transferase activity, transferring hexosyl groups[GO:0016758]	NA	NA
TR3560|c0_g1_i3	1005	4.46154e-97	77	303.523	1944201	flavonoid 3-O-glucosyltransferase	Perilla frutescens	Lamiaceae	NA	transferase activity, transferring glycosyl groups[GO:0016757]	NA	NA
TR39409|c0_g1_i7	596	1.60606e-94	87	291.582	1944201	flavonoid 3-O-glucosyltransferase	Perilla frutescens	Lamiaceae	metabolic process[GO:0008152]	transferase activity, transferring hexosyl groups[GO:0016758]	NA	NA
TR43014|c4_g3_i7	386	1.91724e-83	98	259.996	2160322	cytokinin binding protein CBP57	Nicotiana sylvestris	NA	one-carbon metabolic process[GO:0006730]	adenosylhomocysteinase activity[GO:0004013]	NA	map00270:Cysteine and methionine metabolism(S-adenosylhomocysteine synthase[ec:3.3.1.1])
TR43014|c4_g3_i6	381	8.96018e-81	98	253.062	2160322	cytokinin binding protein CBP57	Nicotiana sylvestris	NA	one-carbon metabolic process[GO:0006730]	adenosylhomocysteinase activity[GO:0004013]	NA	map00270:Cysteine and methionine metabolism(S-adenosylhomocysteine synthase[ec:3.3.1.1])
TR43014|c4_g3_i3	269	3.26714e-54	97	182.185	2160322	cytokinin binding protein CBP57	Nicotiana sylvestris	NA	one-carbon metabolic process[GO:0006730]	adenosylhomocysteinase activity[GO:0004013]	NA	map00270:Cysteine and methionine metabolism(S-adenosylhomocysteine synthase[ec:3.3.1.1])
TR43014|c4_g1_i1	316	1.23741e-52	96	178.718	2160322	cytokinin binding protein CBP57	Nicotiana sylvestris	NA	one-carbon metabolic process[GO:0006730]	adenosylhomocysteinase activity[GO:0004013]	NA	map00270:Cysteine and methionine metabolism(S-adenosylhomocysteine synthase[ec:3.3.1.1])
TR27815|c2_g1_i7	415	5.1356e-45	100	160.229	2160322	cytokinin binding protein CBP57	Nicotiana sylvestris	NA	one-carbon metabolic process[GO:0006730]	adenosylhomocysteinase activity[GO:0004013]	NA	map00270:Cysteine and methionine metabolism(S-adenosylhomocysteine synthase[ec:3.3.1.1])
TR27815|c2_g1_i3	415	5.69865e-21	100	93.9745	2160322	cytokinin binding protein CBP57	Nicotiana sylvestris	NA	one-carbon metabolic process[GO:0006730]	adenosylhomocysteinase activity[GO:0004013]	NA	map00270:Cysteine and methionine metabolism(S-adenosylhomocysteine synthase[ec:3.3.1.1])
TR38229|c0_g1_i5	5108	0	67	936.406	2194136	Strong similarity to Zea mays retrotransposon Hopscotch polyprotein (gb|U12626)	Arabidopsis thaliana	NA	NA	NA	NA	NA
TR37652|c2_g8_i3	1348	5.57646e-133	67	402.905	2209031	unnamed protein product	Daucus carota	NA	NA	NA	NA	NA
TR34674|c5_g4_i1	1396	4.6158e-112	58	349.747	2209031	unnamed protein product	Daucus carota	NA	NA	NA	NA	NA
TR37652|c2_g8_i4	912	5.96901e-38	61	147.902	2209031	unnamed protein product	Daucus carota	NA	NA	NA	NA	NA
TR40218|c0_g3_i3	1831	1.63578e-20	57	101.679	2209031	unnamed protein product	Daucus carota	NA	NA	NA	NA	NA
TR30008|c0_g1_i2	701	7.79712e-85	99	258.07	2209149	cytosolic glutamine synthetase	Helianthus annuus	NA	nitrogen compound metabolic process[GO:0006807]	glutamate-ammonia ligase activity[GO:0004356]	NA	map00220:Arginine biosynthesis(ligase[ec:6.3.1.2]) ; map00630:Glyoxylate and dicarboxylate metabolism(ligase[ec:6.3.1.2]) ; map00250:Alanine, aspartate and glutamate metabolism(ligase[ec:6.3.1.2]) ; map00910:Nitrogen metabolism(ligase[ec:6.3.1.2])
TR37732|c0_g1_i1	602	3.12996e-80	97	244.973	2209149	cytosolic glutamine synthetase	Helianthus annuus	NA	nitrogen compound metabolic process[GO:0006807]	glutamate-ammonia ligase activity[GO:0004356]	NA	map00220:Arginine biosynthesis(ligase[ec:6.3.1.2]) ; map00630:Glyoxylate and dicarboxylate metabolism(ligase[ec:6.3.1.2]) ; map00250:Alanine, aspartate and glutamate metabolism(ligase[ec:6.3.1.2]) ; map00910:Nitrogen metabolism(ligase[ec:6.3.1.2])
TR24701|c0_g1_i1	634	2.53795e-61	100	196.823	2502085	adenosine triphosphatase	Vigna radiata	NA	ATP hydrolysis coupled proton transport[GO:0015991] ; metabolic process[GO:0008152]	ATPase activity[GO:0016887] ; hydrogen ion transmembrane transporter activity[GO:0015078]	proton-transporting V-type ATPase, V0 domain[GO:0033179] ; integral component of membrane[GO:0016021]	map00230:Purine metabolism(adenylpyrophosphatase[ec:3.6.1.3])
TR24701|c0_g2_i2	365	4.96569e-52	99	169.474	2502085	adenosine triphosphatase	Vigna radiata	NA	ATP hydrolysis coupled proton transport[GO:0015991] ; metabolic process[GO:0008152]	ATPase activity[GO:0016887] ; hydrogen ion transmembrane transporter activity[GO:0015078]	proton-transporting V-type ATPase, V0 domain[GO:0033179] ; integral component of membrane[GO:0016021]	map00230:Purine metabolism(adenylpyrophosphatase[ec:3.6.1.3])
TR7445|c0_g2_i1	633	9.30834e-41	100	144.05	2502085	adenosine triphosphatase	Vigna radiata	NA	ATP hydrolysis coupled proton transport[GO:0015991] ; metabolic process[GO:0008152]	ATPase activity[GO:0016887] ; hydrogen ion transmembrane transporter activity[GO:0015078]	proton-transporting V-type ATPase, V0 domain[GO:0033179] ; integral component of membrane[GO:0016021]	map00230:Purine metabolism(adenylpyrophosphatase[ec:3.6.1.3])
TR34949|c1_g4_i3	290	1.75557e-57	96	185.652	2605909	plasma membrane H+-ATPase	Kosteletzkya virginica	NA	NA	nucleotide binding[GO:0000166]	integral component of membrane[GO:0016021]	NA
TR32275|c2_g3_i2	450	5.06068e-44	87	149.828	2647949	cytochrome b5	Olea europaea	NA	NA	heme binding[GO:0020037] ; metal ion binding[GO:0046872]	integral component of membrane[GO:0016021]	NA
TR37327|c0_g11_i1	233	4.36239e-45	100	148.288	2654011	Rho-like GTP binding protein	Arabidopsis thaliana	NA	NA	NA	NA	NA
TR37327|c0_g6_i2	494	1.34831e-29	100	112.079	2654011	Rho-like GTP binding protein	Arabidopsis thaliana	NA	NA	NA	NA	NA
TR23763|c1_g1_i1	387	4.76518e-18	100	80.8777	2654011	Rho-like GTP binding protein	Arabidopsis thaliana	NA	NA	NA	NA	NA
TR43910|c2_g3_i1	290	5.16192e-58	93	183.726	2792510	glycine decarboxylase P subunit	Coffea arabica	NA	glycine catabolic process[GO:0006546] ; oxidation-reduction process[GO:0055114]	glycine dehydrogenase (decarboxylating) activity[GO:0004375]	NA	map00260:Glycine, serine and threonine metabolism(dehydrogenase (aminomethyl-transferring)[ec:1.4.4.2])
TR31904|c0_g1_i1	350	1.4116e-74	98	228.409	2911807	H+-pyrophosphatase, partial	Gossypium hirsutum	NA	metabolic process[GO:0008152] ; proton transport[GO:0015992] ; transmembrane transport[GO:0055085]	inorganic diphosphatase activity[GO:0004427] ; hydrogen-translocating pyrophosphatase activity[GO:0009678]	integral component of membrane[GO:0016021]	map00190:Oxidative phosphorylation(diphosphatase[ec:3.6.1.1])
TR36629|c0_g2_i1	1786	0	96	896.73	2921209	beta-ketoacyl-ACP synthase I	Perilla frutescens	Lamiaceae	fatty acid biosynthetic process[GO:0006633]	transferase activity, transferring acyl groups other than amino-acyl groups[GO:0016747]	NA	NA
TR40615|c0_g1_i2	1728	0	96	687.567	2921213	beta-ketoacyl-ACP synthase IIIA	Perilla frutescens	Lamiaceae	fatty acid biosynthetic process[GO:0006633]	3-oxoacyl-[acyl-carrier-protein] synthase activity[GO:0004315]	NA	map00061:Fatty acid biosynthesis(synthase I[ec:2.3.1.41]) ; map00780:Biotin metabolism(synthase I[ec:2.3.1.41])
TR2541|c0_g2_i2	1631	0	94	706.057	2921215	beta-ketoacyl-ACP synthase IIIB	Perilla frutescens	Lamiaceae	fatty acid biosynthetic process[GO:0006633]	3-oxoacyl-[acyl-carrier-protein] synthase activity[GO:0004315]	NA	map00061:Fatty acid biosynthesis(synthase I[ec:2.3.1.41]) ; map00780:Biotin metabolism(synthase I[ec:2.3.1.41])
TR2541|c0_g2_i3	631	8.71797e-120	96	355.14	2921215	beta-ketoacyl-ACP synthase IIIB	Perilla frutescens	Lamiaceae	fatty acid biosynthetic process[GO:0006633]	3-oxoacyl-[acyl-carrier-protein] synthase activity[GO:0004315]	NA	map00061:Fatty acid biosynthesis(synthase I[ec:2.3.1.41]) ; map00780:Biotin metabolism(synthase I[ec:2.3.1.41])
TR31018|c0_g1_i1	901	0	99	580.867	3024127	METK2_CATRORecName: Full=S-adenosylmethionine synthase 2; Short=AdoMet synthase 2; AltName: Full=Methionine adenosyltransferase 2; Short=MAT 2	Catharanthus roseus	NA	S-adenosylmethionine biosynthetic process[GO:0006556] ; one-carbon metabolic process[GO:0006730]	methionine adenosyltransferase activity[GO:0004478] ; metal ion binding[GO:0046872] ; ATP binding[GO:0005524]	cytoplasm[GO:0005737]	map00270:Cysteine and methionine metabolism(adenosyltransferase[ec:2.5.1.6])
TR30373|c2_g4_i8	550	2.3693e-24	100	97.8265	3043432	Ubiquitin conjugating enzyme	Cicer arietinum	NA	NA	NA	NA	NA
TR29478|c0_g1_i3	651	2.95436e-35	100	135.191	3046731	protein kinase	Craterostigma plantagineum	NA	protein phosphorylation[GO:0006468]	protein kinase activity[GO:0004672] ; ATP binding[GO:0005524]	NA	NA
TR29478|c0_g1_i1	703	4.97416e-35	100	135.191	3046731	protein kinase	Craterostigma plantagineum	NA	protein phosphorylation[GO:0006468]	protein kinase activity[GO:0004672] ; ATP binding[GO:0005524]	NA	NA
TR41381|c0_g1_i1	739	7.11187e-157	93	458.759	3121731	ACOC_SOLTURecName: Full=Aconitate hydratase, cytoplasmic; Short=Aconitase; AltName: Full=Citrate hydro-lyase	Solanum tuberosum	NA	glyoxylate cycle[GO:0006097]	metal ion binding[GO:0046872] ; 4 iron, 4 sulfur cluster binding[GO:0051539] ; aconitate hydratase activity[GO:0003994]	cytoplasm[GO:0005737]	map00630:Glyoxylate and dicarboxylate metabolism(hydratase[ec:4.2.1.3]) ; map01130:Biosynthesis of antibiotics(hydratase[ec:4.2.1.3]) ; map00720:Carbon fixation pathways in prokaryotes(hydratase[ec:4.2.1.3]) ; map00020:Citrate cycle (TCA cycle)(hydratase[ec:4.2.1.3])
TR42805|c1_g2_i1	233	6.47458e-49	98	164.081	3123616	cyclin-dependent protein kinase p34cdc2	Solanum lycopersicum	NA	protein phosphorylation[GO:0006468]	protein kinase activity[GO:0004672] ; ATP binding[GO:0005524]	NA	NA
TR44226|c1_g3_i1	300	9.33185e-61	96	197.978	3193292	T14P8.7	Arabidopsis thaliana	NA	NA	NA	NA	NA
TR42558|c1_g1_i7	1582	2.66698e-163	91	474.167	3288183	hypothetical protein	Clerodendrum trichotomum	Lamiaceae	nucleic acid phosphodiester bond hydrolysis[GO:0090305]	endonuclease activity[GO:0004519]	mitochondrion[GO:0005739]	NA
TR42558|c1_g1_i2	1835	5.63162e-161	91	471.47	3288183	hypothetical protein	Clerodendrum trichotomum	Lamiaceae	nucleic acid phosphodiester bond hydrolysis[GO:0090305]	endonuclease activity[GO:0004519]	mitochondrion[GO:0005739]	NA
TR33439|c0_g5_i5	565	4.38506e-130	99	375.17	3293555	chlorophyll a/b binding protein	Medicago sativa	NA	photosynthesis, light harvesting[GO:0009765] ; protein-chromophore linkage[GO:0018298]	metal ion binding[GO:0046872] ; chlorophyll binding[GO:0016168]	photosystem II[GO:0009523] ; integral component of membrane[GO:0016021] ; chloroplast[GO:0009507] ; photosystem I[GO:0009522]	NA
TR33439|c0_g5_i9	558	7.88635e-129	99	372.089	3293555	chlorophyll a/b binding protein	Medicago sativa	NA	photosynthesis, light harvesting[GO:0009765] ; protein-chromophore linkage[GO:0018298]	metal ion binding[GO:0046872] ; chlorophyll binding[GO:0016168]	photosystem II[GO:0009523] ; integral component of membrane[GO:0016021] ; chloroplast[GO:0009507] ; photosystem I[GO:0009522]	NA
TR30036|c0_g1_i2	255	1.56307e-13	86	68.5514	3297847	nonsymbiotic hemoglobin	Cichorium intybus x Cichorium endivia	NA	NA	heme binding[GO:0020037] ; metal ion binding[GO:0046872] ; oxygen binding[GO:0019825]	NA	NA
TR2564|c0_g1_i1	1023	2.7742e-152	87	442.965	3334115	ADT1_GOSHIRecName: Full=ADP,ATP carrier protein 1, mitochondrial; AltName: Full=ADP/ATP translocase 1; AltName: Full=Adenine nucleotide translocator 1; Short=ANT 1; Flags: Precursor	Gossypium hirsutum	NA	transmembrane transport[GO:0055085]	transporter activity[GO:0005215]	mitochondrial inner membrane[GO:0005743] ; integral component of membrane[GO:0016021]	NA
TR37644|c0_g5_i1	233	1.78177e-42	96	149.828	3334197	GCST_FLAANRecName: Full=Aminomethyltransferase, mitochondrial; AltName: Full=Glycine cleavage system T protein; Short=GCVT; Flags: Precursor	Flaveria anomala	NA	glycine catabolic process[GO:0006546] ; methylation[GO:0032259]	aminomethyltransferase activity[GO:0004047] ; transaminase activity[GO:0008483]	mitochondrion[GO:0005739]	map00260:Glycine, serine and threonine metabolism(S-aminomethyldihydrolipoylprotein:(6S)-tetrahydrofolate aminomethyltransferase (ammonia-forming)[ec:2.1.2.10]) ; map00670:One carbon pool by folate(S-aminomethyldihydrolipoylprotein:(6S)-tetrahydrofolate aminomethyltransferase (ammonia-forming)[ec:2.1.2.10])
TR37644|c0_g6_i1	574	1.46377e-44	96	160.229	3334202	GCST_MESCRRecName: Full=Aminomethyltransferase, mitochondrial; AltName: Full=Glycine cleavage system T protein; Short=GCVT; Flags: Precursor	Mesembryanthemum crystallinum	NA	glycine catabolic process[GO:0006546] ; methylation[GO:0032259]	aminomethyltransferase activity[GO:0004047] ; transaminase activity[GO:0008483]	mitochondrion[GO:0005739]	map00260:Glycine, serine and threonine metabolism(S-aminomethyldihydrolipoylprotein:(6S)-tetrahydrofolate aminomethyltransferase (ammonia-forming)[ec:2.1.2.10]) ; map00670:One carbon pool by folate(S-aminomethyldihydrolipoylprotein:(6S)-tetrahydrofolate aminomethyltransferase (ammonia-forming)[ec:2.1.2.10])
TR41835|c0_g2_i1	224	1.10749e-35	97	127.102	3355640	IVR-like protein	Nicotiana tabacum	NA	NA	NA	NA	NA
TR41156|c0_g2_i2	356	2.02622e-31	85	122.094	3551257	98b	Daucus carota	NA	NA	NA	NA	NA
TR32520|c0_g1_i1	1758	0	81	654.825	3582021	cytochrome P450	Nepeta racemosa	Lamiaceae	oxidation-reduction process[GO:0055114]	heme binding[GO:0020037] ; oxidoreductase activity, acting on paired donors, with incorporation or reduction of molecular oxygen[GO:0016705] ; monooxygenase activity[GO:0004497] ; iron ion binding[GO:0005506]	NA	NA
TR39166|c0_g4_i3	251	1.17406e-44	95	158.303	3582436	beta-D-glucan exohydrolase	Nicotiana tabacum	NA	carbohydrate metabolic process[GO:0005975]	hydrolase activity, hydrolyzing O-glycosyl compounds[GO:0004553]	NA	NA
TR34303|c1_g5_i2	425	1.86343e-72	97	228.024	3759184	phi-1	Nicotiana tabacum	NA	NA	NA	NA	NA
TR42645|c1_g3_i1	265	6.58193e-26	92	104.76	3805956	laccase	Populus trichocarpa	NA	lignin catabolic process[GO:0046274] ; oxidation-reduction process[GO:0055114]	copper ion binding[GO:0005507] ; hydroquinone:oxygen oxidoreductase activity[GO:0052716]	apoplast[GO:0048046]	NA
TR35088|c0_g9_i1	360	1.50733e-12	97	66.2402	3914771	RL5_SOLMERecName: Full=60S ribosomal protein L5	Solanum melongena	NA	translation[GO:0006412]	5S rRNA binding[GO:0008097] ; structural constituent of ribosome[GO:0003735]	ribosome[GO:0005840]	NA
TR35271|c1_g2_i3	225	5.34271e-07	61	51.2174	4033446	LEC2_CLALURecName: Full=Agglutinin-2; AltName: Full=Agglutinin II; AltName: Full=ClAII; AltName: Full=LecClAII; Flags: Precursor	Cladrastis kentukea	NA	NA	NA	NA	NA
TR43481|c0_g1_i8	356	1.99085e-64	88	202.216	4063748	unknown protein	Arabidopsis thaliana	NA	NA	NA	NA	NA
TR39531|c1_g6_i2	345	1.0056e-78	100	239.195	4097583	NTGP3	Nicotiana tabacum	NA	small GTPase mediated signal transduction[GO:0007264]	GTP binding[GO:0005525]	intracellular[GO:0005622] ; membrane[GO:0016020]	NA
TR2744|c0_g3_i5	801	5.96793e-75	78	238.81	4115565	MYB homologue, partial	Perilla frutescens var. crispa	NA	NA	NA	NA	NA
TR44694|c0_g2_i1	283	1.59343e-45	88	162.54	4138343	RNA-directed RNA polymerase	Petunia x hybrida	NA	transcription, RNA-templated[GO:0001172]	RNA-directed RNA polymerase activity[GO:0003968]	NA	NA
TR38335|c0_g2_i1	365	1.26644e-06	82	51.9878	4218141	HMR1 protein	Antirrhinum majus	NA	NA	NA	NA	NA
TR33708|c0_g1_i1	1476	0	90	599.742	4321399	omega-3 fatty acid desaturase	Perilla frutescens	Lamiaceae	oxidation-reduction process[GO:0055114] ; lipid metabolic process[GO:0006629]	oxidoreductase activity, acting on paired donors, with oxidation of a pair of donors resulting in the reduction of molecular oxygen to two molecules of water[GO:0016717]	integral component of membrane[GO:0016021]	NA
TR33708|c0_g1_i2	738	4.26329e-135	92	395.201	4321399	omega-3 fatty acid desaturase	Perilla frutescens	Lamiaceae	oxidation-reduction process[GO:0055114] ; lipid metabolic process[GO:0006629]	oxidoreductase activity, acting on paired donors, with oxidation of a pair of donors resulting in the reduction of molecular oxygen to two molecules of water[GO:0016717]	integral component of membrane[GO:0016021]	NA
TR23276|c0_g1_i1	664	1.11832e-127	88	375.555	4321399	omega-3 fatty acid desaturase	Perilla frutescens	Lamiaceae	oxidation-reduction process[GO:0055114] ; lipid metabolic process[GO:0006629]	oxidoreductase activity, acting on paired donors, with oxidation of a pair of donors resulting in the reduction of molecular oxygen to two molecules of water[GO:0016717]	integral component of membrane[GO:0016021]	NA
TR33708|c0_g3_i1	242	3.5373e-37	86	135.576	4321399	omega-3 fatty acid desaturase	Perilla frutescens	Lamiaceae	oxidation-reduction process[GO:0055114] ; lipid metabolic process[GO:0006629]	oxidoreductase activity, acting on paired donors, with oxidation of a pair of donors resulting in the reduction of molecular oxygen to two molecules of water[GO:0016717]	integral component of membrane[GO:0016021]	NA
TR37620|c4_g4_i5	5548	0	64	842.032	4388818	putative retroelement pol polyprotein	Arabidopsis thaliana	NA	NA	NA	NA	NA
TR39210|c1_g1_i15	3376	2.66771e-128	71	433.335	4388818	putative retroelement pol polyprotein	Arabidopsis thaliana	NA	NA	NA	NA	NA
TR28872|c0_g1_i2	465	1.60764e-90	100	271.552	4454799	translation initiation factor 4A2	Zea mays	NA	translational initiation[GO:0006413]	translation initiation factor activity[GO:0003743]	NA	NA
TR28872|c0_g1_i1	705	3.43189e-89	100	271.552	4454799	translation initiation factor 4A2	Zea mays	NA	translational initiation[GO:0006413]	translation initiation factor activity[GO:0003743]	NA	NA
TR39597|c1_g6_i2	389	3.90399e-84	100	254.218	4454799	translation initiation factor 4A2	Zea mays	NA	translational initiation[GO:0006413]	translation initiation factor activity[GO:0003743]	NA	NA
TR41742|c1_g3_i1	1434	0	90	744.577	4519199	MYC-RP	Perilla frutescens	Lamiaceae	NA	protein dimerization activity[GO:0046983]	NA	NA
TR26631|c0_g1_i3	881	1.88868e-159	87	467.618	4519199	MYC-RP	Perilla frutescens	Lamiaceae	NA	protein dimerization activity[GO:0046983]	NA	NA
TR41742|c1_g3_i2	446	1.55502e-68	87	226.483	4519199	MYC-RP	Perilla frutescens	Lamiaceae	NA	protein dimerization activity[GO:0046983]	NA	NA
TR41742|c1_g3_i4	251	7.47699e-29	83	114.775	4519199	MYC-RP	Perilla frutescens	Lamiaceae	NA	protein dimerization activity[GO:0046983]	NA	NA
TR41742|c1_g3_i5	912	4.63658e-148	86	438.728	4519201	MYC-GP	Perilla frutescens	Lamiaceae	NA	protein dimerization activity[GO:0046983]	NA	NA
TR41742|c1_g2_i4	951	1.56128e-131	91	397.127	4519201	MYC-GP	Perilla frutescens	Lamiaceae	NA	protein dimerization activity[GO:0046983]	NA	NA
TR41742|c1_g2_i2	688	2.89244e-77	94	252.677	4519201	MYC-GP	Perilla frutescens	Lamiaceae	NA	protein dimerization activity[GO:0046983]	NA	NA
TR41742|c1_g2_i7	511	5.15152e-64	92	215.312	4519201	MYC-GP	Perilla frutescens	Lamiaceae	NA	protein dimerization activity[GO:0046983]	NA	NA
TR28629|c0_g2_i1	377	7.08925e-25	85	105.531	4519201	MYC-GP	Perilla frutescens	Lamiaceae	NA	protein dimerization activity[GO:0046983]	NA	NA
TR41742|c1_g2_i3	264	2.35674e-17	89	82.8037	4519201	MYC-GP	Perilla frutescens	Lamiaceae	NA	protein dimerization activity[GO:0046983]	NA	NA
TR41742|c1_g1_i1	234	1.11295e-14	95	74.7146	4519201	MYC-GP	Perilla frutescens	Lamiaceae	NA	protein dimerization activity[GO:0046983]	NA	NA
TR31669|c0_g1_i1	1046	9.59513e-34	50	134.42	4544460	putative non-LTR retroelement reverse transcriptase	Arabidopsis thaliana	NA	NA	NA	NA	NA
TR31689|c0_g2_i1	321	6.59115e-15	88	74.7146	4589836	LeArcA2 protein	Solanum lycopersicum	NA	NA	NA	NA	NA
TR35255|c2_g3_i2	276	6.88865e-32	87	120.168	4689382	AF139466_1chlorophyll a/b binding protein CP29	Vigna radiata	NA	photosynthesis, light harvesting[GO:0009765] ; protein-chromophore linkage[GO:0018298]	metal ion binding[GO:0046872] ; chlorophyll binding[GO:0016168]	photosystem II[GO:0009523] ; integral component of membrane[GO:0016021] ; chloroplast[GO:0009507] ; photosystem I[GO:0009522]	NA
TR42231|c0_g7_i1	591	2.10993e-88	99	275.018	4753845	FtsZ-like protein	Nicotiana tabacum	NA	microtubule-based process[GO:0007017] ; metabolic process[GO:0008152] ; cell division[GO:0051301]	GTP binding[GO:0005525] ; GTPase activity[GO:0003924]	cytoplasm[GO:0005737] ; microtubule[GO:0005874]	NA
TR43983|c2_g1_i3	485	7.2406e-116	100	337.806	4867856	RNA polymerase II	Peltanthera floribunda	NA	transcription, DNA-templated[GO:0006351]	DNA-directed RNA polymerase activity[GO:0003899] ; DNA binding[GO:0003677] ; ribonucleoside binding[GO:0032549]	NA	map00240:Pyrimidine metabolism(RNA polymerase[ec:2.7.7.6]) ; map00230:Purine metabolism(RNA polymerase[ec:2.7.7.6])
TR36672|c1_g11_i1	237	7.57009e-37	98	130.954	4887022	AF123509_1Nt-iaa4.1 deduced protein	Nicotiana tabacum	NA	auxin-activated signaling pathway[GO:0009734] ; regulation of transcription, DNA-templated[GO:0006355] ; transcription, DNA-templated[GO:0006351]	NA	nucleus[GO:0005634]	NA
TR36672|c1_g11_i3	371	7.22103e-36	98	130.183	4887022	AF123509_1Nt-iaa4.1 deduced protein	Nicotiana tabacum	NA	auxin-activated signaling pathway[GO:0009734] ; regulation of transcription, DNA-templated[GO:0006355] ; transcription, DNA-templated[GO:0006351]	NA	nucleus[GO:0005634]	NA
TR7423|c0_g1_i1	386	1.93177e-75	94	241.506	4938492	putative villin, fragment	Arabidopsis thaliana	NA	NA	NA	NA	NA
TR42971|c0_g5_i1	251	9.28253e-40	87	137.117	5231119	AF143202_1starch phosphorylase L	Solanum tuberosum	NA	carbohydrate metabolic process[GO:0005975]	glycogen phosphorylase activity[GO:0008184]	NA	NA
TR44765|c0_g1_i2	3716	0	83	1724.91	5734736	AC007259_14Hypothetical protein	Arabidopsis thaliana	NA	NA	NA	NA	NA
TR33237|c1_g3_i4	305	9.91071e-70	100	213.386	5757890	AF106569_1alpha-tubulin	Gossypium hirsutum	NA	microtubule-based process[GO:0007017]	structural constituent of cytoskeleton[GO:0005200] ; GTP binding[GO:0005525]	microtubule[GO:0005874]	NA
TR39143|c1_g6_i8	308	2.06944e-71	100	217.238	5757892	AF106570_1alpha-tubulin	Gossypium hirsutum	NA	microtubule-based process[GO:0007017]	structural constituent of cytoskeleton[GO:0005200] ; GTP binding[GO:0005525]	microtubule[GO:0005874]	NA
TR36861|c1_g2_i5	1309	0	98	781.941	5921781	CHSY_PERFRRecName: Full=Chalcone synthase; AltName: Full=Naringenin-chalcone synthase	Perilla frutescens	Lamiaceae	flavonoid biosynthetic process[GO:0009813]	naringenin-chalcone synthase activity[GO:0016210]	NA	map00941:Flavonoid biosynthesis(synthase[ec:2.3.1.74])
TR36861|c1_g2_i7	595	6.13475e-134	98	390.193	5921781	CHSY_PERFRRecName: Full=Chalcone synthase; AltName: Full=Naringenin-chalcone synthase	Perilla frutescens	Lamiaceae	flavonoid biosynthetic process[GO:0009813]	naringenin-chalcone synthase activity[GO:0016210]	NA	map00941:Flavonoid biosynthesis(synthase[ec:2.3.1.74])
TR36861|c1_g2_i3	691	8.09558e-122	98	360.918	5921781	CHSY_PERFRRecName: Full=Chalcone synthase; AltName: Full=Naringenin-chalcone synthase	Perilla frutescens	Lamiaceae	flavonoid biosynthetic process[GO:0009813]	naringenin-chalcone synthase activity[GO:0016210]	NA	map00941:Flavonoid biosynthesis(synthase[ec:2.3.1.74])
TR40145|c1_g3_i9	270	1.92919e-47	97	155.221	6010773	AF187853_1putative multispanning membrane protein	Populus tremula x Populus alba	NA	NA	NA	integral component of membrane[GO:0016021]	NA
TR33824|c0_g2_i2	277	3.86339e-27	100	106.301	6014904	DAG_ANTMARecName: Full=DAG protein, chloroplastic; Flags: Precursor	Antirrhinum majus	NA	NA	NA	chloroplast[GO:0009507]	NA
TR33824|c0_g2_i1	636	1.56649e-25	100	106.301	6014904	DAG_ANTMARecName: Full=DAG protein, chloroplastic; Flags: Precursor	Antirrhinum majus	NA	NA	NA	chloroplast[GO:0009507]	NA
TR30035|c1_g1_i1	1173	1.38166e-124	74	372.859	6448482	cyclin D3a	Antirrhinum majus	NA	NA	NA	NA	NA
TR34263|c0_g1_i2	1428	4.72332e-107	76	330.872	6448482	cyclin D3a	Antirrhinum majus	NA	NA	NA	NA	NA
TR30035|c1_g1_i2	789	5.96105e-82	83	258.455	6448482	cyclin D3a	Antirrhinum majus	NA	NA	NA	nucleus[GO:0005634]	NA
TR34867|c1_g1_i3	1225	4.75292e-154	79	449.899	6449052	AF182828_1geranyl diphosphate synthase large subunit	Mentha x piperita	NA	geranyl diphosphate biosynthetic process[GO:0033384]	metal ion binding[GO:0046872] ; dimethylallyltranstransferase activity[GO:0004161]	NA	map01130:Biosynthesis of antibiotics(geranyl-diphosphate synthase[ec:2.5.1.1]) ; map00900:Terpenoid backbone biosynthesis(geranyl-diphosphate synthase[ec:2.5.1.1])
TR44082|c2_g7_i1	900	0	93	569.311	6456434	lupeol synthase	Olea europaea	NA	metabolic process[GO:0008152]	intramolecular transferase activity[GO:0016866]	NA	NA
TR44082|c2_g7_i3	537	1.77726e-113	96	348.591	6456434	lupeol synthase	Olea europaea	NA	metabolic process[GO:0008152]	intramolecular transferase activity[GO:0016866]	NA	NA
TR41470|c1_g10_i1	224	6.82631e-43	95	146.362	6469119	mitochondrial phosphate transporter	Cicer arietinum	NA	transport[GO:0006810]	NA	integral component of membrane[GO:0016021]	NA
TR43986|c2_g5_i1	305	2.64309e-11	70	65.0846	6492266	AF110228_1nuclear RNA binding protein A	Spinacia oleracea	NA	NA	NA	NA	NA
TR28049|c1_g1_i2	348	3.51373e-76	99	236.498	6601496	AF212157_1S-adenosylhomocysteine hydrolase	Allium cepa	NA	one-carbon metabolic process[GO:0006730]	adenosylhomocysteinase activity[GO:0004013]	NA	map00270:Cysteine and methionine metabolism(S-adenosylhomocysteine synthase[ec:3.3.1.1])
TR11257|c0_g2_i2	574	6.87843e-20	87	92.8189	6630869	legumin-like protein	Perilla frutescens	Lamiaceae	NA	nutrient reservoir activity[GO:0045735]	NA	NA
TR40182|c2_g2_i1	632	2.99655e-79	97	245.743	6652756	MADS box protein	Paulownia kawakamii	NA	regulation of transcription, DNA-templated[GO:0006355] ; transcription, DNA-templated[GO:0006351]	transcription factor activity, sequence-specific DNA binding[GO:0003700] ; DNA binding[GO:0003677] ; protein dimerization activity[GO:0046983]	nucleus[GO:0005634]	NA
TR40182|c2_g5_i2	593	3.21792e-51	84	173.326	6652756	MADS box protein	Paulownia kawakamii	NA	regulation of transcription, DNA-templated[GO:0006355] ; transcription, DNA-templated[GO:0006351]	transcription factor activity, sequence-specific DNA binding[GO:0003700] ; DNA binding[GO:0003677] ; protein dimerization activity[GO:0046983]	nucleus[GO:0005634]	NA
TR39879|c0_g2_i2	447	7.91293e-58	89	186.037	6653740	AF209910_1vacuolar sorting receptor protein	Prunus dulcis	NA	NA	calcium ion binding[GO:0005509]	integral component of membrane[GO:0016021]	NA
TR38598|c0_g1_i1	275	8.78958e-37	94	138.658	6691125	AF213696_1FH protein NFH2	Nicotiana tabacum	NA	NA	NA	integral component of membrane[GO:0016021]	NA
TR40550|c0_g1_i6	515	1.78421e-118	99	348.977	6721533	vacuolar H+-ATPase B subunit	Citrus unshiu	NA	ATP metabolic process[GO:0046034] ; proton transport[GO:0015992]	ATP binding[GO:0005524]	NA	NA
TR34275|c0_g3_i4	497	4.20993e-47	89	164.851	6899972	chloroplast ferredoxin-NADP+ oxidoreductase precursor	Capsicum annuum	NA	oxidation-reduction process[GO:0055114]	ferredoxin-NADP+ reductase activity[GO:0004324] ; nucleotide binding[GO:0000166]	NA	map00195:Photosynthesis(reductase[ec:1.18.1.2])
TR43084|c0_g3_i1	239	4.66361e-31	84	119.013	6919914	ISPE_MENPIRecName: Full=4-diphosphocytidyl-2-C-methyl-D-erythritol kinase, chloroplastic; AltName: Full=4-(cytidine-5'-diphospho)-2-C-methyl-D-erythritol kinase; Short=CMK; Flags: Precursor	Mentha piperita	Lamiaceae	isopentenyl diphosphate biosynthetic process, methylerythritol 4-phosphate pathway[GO:0019288] ; terpenoid biosynthetic process[GO:0016114] ; phosphorylation[GO:0016310]	ATP binding[GO:0005524] ; 4-(cytidine 5'-diphospho)-2-C-methyl-D-erythritol kinase activity[GO:0050515]	chloroplast[GO:0009507]	map01130:Biosynthesis of antibiotics(5'-diphospho)-2-C-methyl-D-erythritol kinase[ec:2.7.1.148]) ; map00900:Terpenoid backbone biosynthesis(5'-diphospho)-2-C-methyl-D-erythritol kinase[ec:2.7.1.148])
TR43084|c0_g1_i5	915	2.51281e-27	87	116.316	6919914	ISPE_MENPIRecName: Full=4-diphosphocytidyl-2-C-methyl-D-erythritol kinase, chloroplastic; AltName: Full=4-(cytidine-5'-diphospho)-2-C-methyl-D-erythritol kinase; Short=CMK; Flags: Precursor	Mentha piperita	Lamiaceae	isopentenyl diphosphate biosynthetic process, methylerythritol 4-phosphate pathway[GO:0019288] ; terpenoid biosynthetic process[GO:0016114] ; phosphorylation[GO:0016310]	ATP binding[GO:0005524] ; 4-(cytidine 5'-diphospho)-2-C-methyl-D-erythritol kinase activity[GO:0050515]	chloroplast[GO:0009507]	map01130:Biosynthesis of antibiotics(5'-diphospho)-2-C-methyl-D-erythritol kinase[ec:2.7.1.148]) ; map00900:Terpenoid backbone biosynthesis(5'-diphospho)-2-C-methyl-D-erythritol kinase[ec:2.7.1.148])
TR28616|c0_g1_i1	939	1.55387e-92	97	286.96	6934298	AF221856_1heat-shock protein 80	Euphorbia esula	NA	protein folding[GO:0006457] ; response to stress[GO:0006950]	ATP binding[GO:0005524] ; unfolded protein binding[GO:0051082]	NA	NA
TR28616|c0_g1_i2	655	1.79047e-91	97	280.411	6934298	AF221856_1heat-shock protein 80	Euphorbia esula	NA	protein folding[GO:0006457] ; response to stress[GO:0006950]	ATP binding[GO:0005524] ; unfolded protein binding[GO:0051082]	NA	NA
TR43009|c2_g4_i2	626	2.08036e-79	98	249.21	6934298	AF221856_1heat-shock protein 80	Euphorbia esula	NA	protein folding[GO:0006457] ; response to stress[GO:0006950]	ATP binding[GO:0005524] ; unfolded protein binding[GO:0051082]	NA	NA
TR7306|c0_g1_i3	422	2.58888e-69	96	220.32	6934298	AF221856_1heat-shock protein 80	Euphorbia esula	NA	protein folding[GO:0006457] ; response to stress[GO:0006950]	ATP binding[GO:0005524] ; unfolded protein binding[GO:0051082]	NA	NA
TR28616|c0_g1_i3	382	1.7949e-57	95	189.119	6934298	AF221856_1heat-shock protein 80	Euphorbia esula	NA	protein folding[GO:0006457] ; response to stress[GO:0006950]	ATP binding[GO:0005524] ; unfolded protein binding[GO:0051082]	NA	NA
TR7306|c0_g1_i2	433	9.23288e-34	95	127.872	6934298	AF221856_1heat-shock protein 80	Euphorbia esula	NA	protein folding[GO:0006457] ; response to stress[GO:0006950]	ATP binding[GO:0005524] ; unfolded protein binding[GO:0051082]	NA	NA
TR7306|c0_g1_i1	274	7.64685e-28	95	109.768	6934298	AF221856_1heat-shock protein 80	Euphorbia esula	NA	protein folding[GO:0006457] ; response to stress[GO:0006950]	ATP binding[GO:0005524] ; unfolded protein binding[GO:0051082]	NA	NA
TR37078|c0_g3_i1	248	2.70735e-47	97	159.458	7378773	H+-ATPase	Medicago truncatula	NA	metabolic process[GO:0008152]	hydrolase activity[GO:0016787] ; nucleotide binding[GO:0000166]	integral component of membrane[GO:0016021]	NA
TR41859|c0_g8_i1	614	2.86729e-128	93	378.252	7649389	S6 ribosomal protein kinase	Asparagus officinalis	NA	protein phosphorylation[GO:0006468]	ATP binding[GO:0005524] ; protein serine/threonine kinase activity[GO:0004674]	ribosome[GO:0005840]	NA
TR38266|c1_g1_i8	1213	0	98	610.527	7671230	AF249915_1ADP-glucose pyrophosphorylase catalytic subunit	Perilla frutescens	Lamiaceae	starch biosynthetic process[GO:0019252] ; glycogen biosynthetic process[GO:0005978]	ATP binding[GO:0005524] ; glucose-1-phosphate adenylyltransferase activity[GO:0008878]	chloroplast[GO:0009507]	map00500:Starch and sucrose metabolism(adenylyltransferase[ec:2.7.7.27]) ; map00520:Amino sugar and nucleotide sugar metabolism(adenylyltransferase[ec:2.7.7.27])
TR38266|c1_g1_i3	1958	0	94	951.044	7671230	AF249915_1ADP-glucose pyrophosphorylase catalytic subunit	Perilla frutescens	Lamiaceae	starch biosynthetic process[GO:0019252] ; glycogen biosynthetic process[GO:0005978]	ATP binding[GO:0005524] ; glucose-1-phosphate adenylyltransferase activity[GO:0008878]	chloroplast[GO:0009507]	map00500:Starch and sucrose metabolism(adenylyltransferase[ec:2.7.7.27]) ; map00520:Amino sugar and nucleotide sugar metabolism(adenylyltransferase[ec:2.7.7.27])
TR38266|c1_g1_i9	742	5.25157e-128	98	381.719	7671230	AF249915_1ADP-glucose pyrophosphorylase catalytic subunit	Perilla frutescens	Lamiaceae	starch biosynthetic process[GO:0019252] ; glycogen biosynthetic process[GO:0005978]	ATP binding[GO:0005524] ; glucose-1-phosphate adenylyltransferase activity[GO:0008878]	chloroplast[GO:0009507]	map00500:Starch and sucrose metabolism(adenylyltransferase[ec:2.7.7.27]) ; map00520:Amino sugar and nucleotide sugar metabolism(adenylyltransferase[ec:2.7.7.27])
TR38266|c1_g1_i2	514	4.02569e-74	98	239.965	7671230	AF249915_1ADP-glucose pyrophosphorylase catalytic subunit	Perilla frutescens	Lamiaceae	starch biosynthetic process[GO:0019252] ; glycogen biosynthetic process[GO:0005978]	ATP binding[GO:0005524] ; glucose-1-phosphate adenylyltransferase activity[GO:0008878]	chloroplast[GO:0009507]	map00500:Starch and sucrose metabolism(adenylyltransferase[ec:2.7.7.27]) ; map00520:Amino sugar and nucleotide sugar metabolism(adenylyltransferase[ec:2.7.7.27])
TR38266|c1_g2_i3	476	4.58073e-50	81	175.637	7671230	AF249915_1ADP-glucose pyrophosphorylase catalytic subunit	Perilla frutescens	Lamiaceae	starch biosynthetic process[GO:0019252] ; glycogen biosynthetic process[GO:0005978]	ATP binding[GO:0005524] ; glucose-1-phosphate adenylyltransferase activity[GO:0008878]	chloroplast[GO:0009507]	map00500:Starch and sucrose metabolism(adenylyltransferase[ec:2.7.7.27]) ; map00520:Amino sugar and nucleotide sugar metabolism(adenylyltransferase[ec:2.7.7.27])
TR38266|c1_g3_i1	267	1.80815e-08	67	56.9954	7671230	AF249915_1ADP-glucose pyrophosphorylase catalytic subunit	Perilla frutescens	Lamiaceae	biosynthetic process[GO:0009058]	transferase activity[GO:0016740]	NA	NA
TR42847|c0_g4_i3	1381	0	93	619.002	7671234	AF249917_1ADP-glucose pyrophosphorylase large subunit	Perilla frutescens	Lamiaceae	starch biosynthetic process[GO:0019252] ; glycogen biosynthetic process[GO:0005978]	ATP binding[GO:0005524] ; glucose-1-phosphate adenylyltransferase activity[GO:0008878]	chloroplast[GO:0009507]	map00500:Starch and sucrose metabolism(adenylyltransferase[ec:2.7.7.27]) ; map00520:Amino sugar and nucleotide sugar metabolism(adenylyltransferase[ec:2.7.7.27])
TR42847|c0_g4_i2	2111	0	94	980.704	7671234	AF249917_1ADP-glucose pyrophosphorylase large subunit	Perilla frutescens	Lamiaceae	starch biosynthetic process[GO:0019252] ; glycogen biosynthetic process[GO:0005978]	ATP binding[GO:0005524] ; glucose-1-phosphate adenylyltransferase activity[GO:0008878]	chloroplast[GO:0009507]	map00500:Starch and sucrose metabolism(adenylyltransferase[ec:2.7.7.27]) ; map00520:Amino sugar and nucleotide sugar metabolism(adenylyltransferase[ec:2.7.7.27])
TR42847|c0_g4_i1	1096	1.12183e-158	92	465.307	7671234	AF249917_1ADP-glucose pyrophosphorylase large subunit	Perilla frutescens	Lamiaceae	starch biosynthetic process[GO:0019252] ; glycogen biosynthetic process[GO:0005978]	ATP binding[GO:0005524] ; glucose-1-phosphate adenylyltransferase activity[GO:0008878]	chloroplast[GO:0009507]	map00500:Starch and sucrose metabolism(adenylyltransferase[ec:2.7.7.27]) ; map00520:Amino sugar and nucleotide sugar metabolism(adenylyltransferase[ec:2.7.7.27])
TR42847|c0_g3_i1	338	7.10536e-69	98	223.787	7671234	AF249917_1ADP-glucose pyrophosphorylase large subunit	Perilla frutescens	Lamiaceae	starch biosynthetic process[GO:0019252] ; glycogen biosynthetic process[GO:0005978]	ATP binding[GO:0005524] ; glucose-1-phosphate adenylyltransferase activity[GO:0008878]	chloroplast[GO:0009507]	map00500:Starch and sucrose metabolism(adenylyltransferase[ec:2.7.7.27]) ; map00520:Amino sugar and nucleotide sugar metabolism(adenylyltransferase[ec:2.7.7.27])
TR42231|c0_g3_i1	227	7.63463e-20	100	87.8113	7672161	chloroplast FtsZ-like protein	Nicotiana tabacum	NA	microtubule-based process[GO:0007017] ; metabolic process[GO:0008152]	GTP binding[GO:0005525] ; GTPase activity[GO:0003924]	cytoplasm[GO:0005737] ; microtubule[GO:0005874]	NA
TR27136|c0_g1_i1	259	1.6333e-23	91	97.4413	8071626	AF141899_1putative aquaporin PIP1-3	Vitis cinerea var. helleri x Vitis rupestris	NA	transport[GO:0006810]	transporter activity[GO:0005215]	integral component of membrane[GO:0016021]	NA
TR41735|c1_g4_i2	1164	0	98	719.539	8134569	METE_SOLSCRecName: Full=5-methyltetrahydropteroyltriglutamate--homocysteine methyltransferase; AltName: Full=Cobalamin-independent methionine synthase isozyme; AltName: Full=Vitamin-B12-independent methionine synthase isozyme	Plectranthus scutellarioides	Lamiaceae	methionine biosynthetic process[GO:0009086] ; methylation[GO:0032259]	zinc ion binding[GO:0008270] ; 5-methyltetrahydropteroyltriglutamate-homocysteine S-methyltransferase activity[GO:0003871]	cytoplasm[GO:0005737]	map00450:Selenocompound metabolism(S-methyltransferase[ec:2.1.1.14]) ; map00270:Cysteine and methionine metabolism(S-methyltransferase[ec:2.1.1.14])
TR23447|c1_g1_i2	712	2.32265e-149	99	444.121	8134569	METE_SOLSCRecName: Full=5-methyltetrahydropteroyltriglutamate--homocysteine methyltransferase; AltName: Full=Cobalamin-independent methionine synthase isozyme; AltName: Full=Vitamin-B12-independent methionine synthase isozyme	Plectranthus scutellarioides	Lamiaceae	methionine biosynthetic process[GO:0009086] ; methylation[GO:0032259]	zinc ion binding[GO:0008270] ; 5-methyltetrahydropteroyltriglutamate-homocysteine S-methyltransferase activity[GO:0003871]	cytoplasm[GO:0005737]	map00450:Selenocompound metabolism(S-methyltransferase[ec:2.1.1.14]) ; map00270:Cysteine and methionine metabolism(S-methyltransferase[ec:2.1.1.14])
TR2214|c3_g9_i1	267	4.36976e-59	100	184.882	8698909	AF195224_1ubiquitin fusion protein	Pyrus pyrifolia	NA	translation[GO:0006412]	structural constituent of ribosome[GO:0003735]	ribosome[GO:0005840]	NA
TR35060|c0_g1_i2	626	2.74014e-48	86	171.785	8778397	AC068197_15F16A14.22	Arabidopsis thaliana	NA	NA	NA	NA	NA
TR41805|c1_g4_i1	451	1.8398e-19	67	91.6633	8778823	AC026875_2T6D22.2	Arabidopsis thaliana	NA	NA	NA	NA	NA
TR8034|c5_g12_i3	230	6.93047e-35	95	121.709	9652346	putative Golgi-associated protein	Solanum lycopersicum	NA	cellulose biosynthetic process[GO:0030244]	intramolecular transferase activity[GO:0016866]	NA	NA
TR8034|c5_g10_i1	365	4.76188e-34	95	121.324	9652346	putative Golgi-associated protein	Solanum lycopersicum	NA	cellulose biosynthetic process[GO:0030244]	intramolecular transferase activity[GO:0016866]	NA	NA
TR41296|c1_g5_i1	410	4.62601e-73	99	233.802	9858170	plasma membrane H+-ATPase	Cucumis sativus	NA	ATP biosynthetic process[GO:0006754] ; hydrogen ion transmembrane transport[GO:1902600]	hydrogen-exporting ATPase activity, phosphorylative mechanism[GO:0008553] ; metal ion binding[GO:0046872] ; ATP binding[GO:0005524]	integral component of membrane[GO:0016021]	map00190:Oxidative phosphorylation(ATPase[ec:3.6.3.6])
TR26112|c0_g1_i1	476	3.24008e-48	93	164.851	9909619	catalase	Digitalis lanata	NA	cellular oxidant detoxification[GO:0098869] ; oxidation-reduction process[GO:0055114] ; response to oxidative stress[GO:0006979]	heme binding[GO:0020037] ; catalase activity[GO:0004096]	NA	map00380:Tryptophan metabolism(equilase[ec:1.11.1.6]) ; map00630:Glyoxylate and dicarboxylate metabolism(equilase[ec:1.11.1.6]) ; map01130:Biosynthesis of antibiotics(equilase[ec:1.11.1.6])
TR34222|c0_g1_i1	443	2.04035e-16	100	79.7221	9909619	catalase	Digitalis lanata	NA	cellular oxidant detoxification[GO:0098869] ; oxidation-reduction process[GO:0055114] ; response to oxidative stress[GO:0006979]	heme binding[GO:0020037] ; catalase activity[GO:0004096]	NA	map00380:Tryptophan metabolism(equilase[ec:1.11.1.6]) ; map00630:Glyoxylate and dicarboxylate metabolism(equilase[ec:1.11.1.6]) ; map01130:Biosynthesis of antibiotics(equilase[ec:1.11.1.6])
TR31547|c0_g2_i1	8588	0	67	785.793	10177143	retroelement pol polyprotein-like	Arabidopsis thaliana	NA	NA	NA	NA	NA
TR31547|c0_g1_i1	8911	0	67	785.793	10177143	retroelement pol polyprotein-like	Arabidopsis thaliana	NA	NA	NA	NA	NA
TR34281|c0_g2_i1	264	2.90607e-34	97	125.946	10334501	putative mitochondrial glyoxalase II	Cicer arietinum	NA	methylglyoxal catabolic process to D-lactate via S-lactoyl-glutathione[GO:0019243]	hydroxyacylglutathione hydrolase activity[GO:0004416]	NA	map00620:Pyruvate metabolism(hydrolase[ec:3.1.2.6])
TR42870|c2_g12_i1	293	1.76219e-61	98	199.904	10432448	protein phosphatase 2C	Nicotiana tabacum	NA	protein dephosphorylation[GO:0006470]	metal ion binding[GO:0046872] ; protein serine/threonine phosphatase activity[GO:0004722]	NA	NA
TR36995|c0_g2_i2	586	6.3487e-64	95	209.149	10697182	secretory peroxidase	Avicennia marina	NA	cellular oxidant detoxification[GO:0098869] ; response to oxidative stress[GO:0006979] ; hydrogen peroxide catabolic process[GO:0042744] ; oxidation-reduction process[GO:0055114]	metal ion binding[GO:0046872] ; heme binding[GO:0020037] ; peroxidase activity[GO:0004601]	extracellular region[GO:0005576]	map00940:Phenylpropanoid biosynthesis(lactoperoxidase[ec:1.11.1.7])
TR42642|c1_g3_i3	235	1.7496e-49	97	162.155	10798634	elongation factor 2	Nicotiana tabacum	NA	translational elongation[GO:0006414]	translation elongation factor activity[GO:0003746] ; GTP binding[GO:0005525]	NA	NA
TR17330|c0_g1_i3	357	5.94097e-71	95	218.394	10798642	lysyl-tRNA synthetase	Nicotiana tabacum	NA	tRNA aminoacylation for protein translation[GO:0006418]	aminoacyl-tRNA ligase activity[GO:0004812] ; ATP binding[GO:0005524]	NA	NA
TR17330|c0_g1_i4	566	1.5483e-58	67	189.889	10798642	lysyl-tRNA synthetase	Nicotiana tabacum	NA	NA	NA	NA	NA
TR41020|c0_g1_i1	1728	0	92	966.837	10803053	AF298815_1diacylglycerol acyltransferase	Perilla frutescens	Lamiaceae	triglyceride biosynthetic process[GO:0019432]	diacylglycerol O-acyltransferase activity[GO:0004144]	endoplasmic reticulum membrane[GO:0005789] ; integral component of membrane[GO:0016021]	map00073:Cutin, suberine and wax biosynthesis(O-acyltransferase[ec:2.3.1.20]) ; map00561:Glycerolipid metabolism(O-acyltransferase[ec:2.3.1.20])
TR41020|c0_g1_i2	443	2.99838e-33	76	128.642	10803053	AF298815_1diacylglycerol acyltransferase	Perilla frutescens	Lamiaceae	NA	O-acyltransferase activity[GO:0008374]	endoplasmic reticulum[GO:0005783] ; membrane part[GO:0044425]	NA
TR37131|c0_g3_i2	381	2.03605e-56	96	181.8	10834738	chloroplast NADP-dependent glyceraldehyde 3-phosphate dehydrogenase A subunit	Cucurbita pepo	NA	oxidation-reduction process[GO:0055114]	oxidoreductase activity, acting on the aldehyde or oxo group of donors, NAD or NADP as acceptor[GO:0016620]	NA	NA
TR42761|c0_g2_i1	246	5.53331e-46	95	153.295	10834742	NADP-dependent malic enzyme	Cucurbita pepo	NA	malate metabolic process[GO:0006108] ; oxidation-reduction process[GO:0055114]	NAD binding[GO:0051287] ; metal ion binding[GO:0046872] ; malate dehydrogenase (decarboxylating) (NAD+) activity[GO:0004471]	NA	map00620:Pyruvate metabolism(dehydrogenase (decarboxylating)[ec:1.1.1.39]) ; map00620:Pyruvate metabolism(dehydrogenase (oxaloacetate-decarboxylating)[ec:1.1.1.38]) ; map00710:Carbon fixation in photosynthetic organisms(dehydrogenase (decarboxylating)[ec:1.1.1.39])
TR42642|c1_g8_i1	242	1.81268e-48	100	161.77	11139240	elongation factor 2	Solanum lycopersicum	NA	translational elongation[GO:0006414]	translation elongation factor activity[GO:0003746] ; GTP binding[GO:0005525]	NA	NA
TR38827|c1_g1_i4	1221	2.39063e-66	74	167.548	11385586	AF261020_1putative chloroplast RNA helicase VDL isoform 1	Nicotiana tabacum	NA	NA	hydrolase activity[GO:0016787] ; organic cyclic compound binding[GO:0097159] ; heterocyclic compound binding[GO:1901363]	NA	NA
TR38411|c5_g7_i3	1110	4.8732e-173	96	496.508	12003283	AF210698_1malonyl-CoA:ACP transacylase	Perilla frutescens	Lamiaceae	metabolic process[GO:0008152]	[acyl-carrier-protein] S-malonyltransferase activity[GO:0004314]	NA	map00061:Fatty acid biosynthesis(S-malonyltransferase[ec:2.3.1.39])
TR38411|c5_g4_i1	364	4.18936e-72	94	228.409	12003283	AF210698_1malonyl-CoA:ACP transacylase	Perilla frutescens	Lamiaceae	metabolic process[GO:0008152]	[acyl-carrier-protein] S-malonyltransferase activity[GO:0004314]	NA	map00061:Fatty acid biosynthesis(S-malonyltransferase[ec:2.3.1.39])
TR39380|c2_g2_i1	1018	0	94	640.573	12003285	AF210699_1granule-bound starch synthase	Perilla frutescens	Lamiaceae	starch biosynthetic process[GO:0019252]	glycogen (starch) synthase activity[GO:0004373]	amyloplast[GO:0009501] ; chloroplast[GO:0009507]	map00500:Starch and sucrose metabolism(synthase[ec:2.4.1.11])
TR39380|c2_g1_i2	2134	0	89	1023.46	12003285	AF210699_1granule-bound starch synthase	Perilla frutescens	Lamiaceae	starch biosynthetic process[GO:0019252]	glycogen (starch) synthase activity[GO:0004373]	amyloplast[GO:0009501] ; chloroplast[GO:0009507]	map00500:Starch and sucrose metabolism(synthase[ec:2.4.1.11])
TR2862|c0_g1_i2	2077	0	84	930.243	12539609	AF229926_1pathogen-inducible alpha-dioxygenase	Nicotiana attenuata	NA	cellular oxidant detoxification[GO:0098869] ; oxidation-reduction process[GO:0055114] ; response to oxidative stress[GO:0006979]	heme binding[GO:0020037] ; peroxidase activity[GO:0004601] ; dioxygenase activity[GO:0051213]	NA	map00940:Phenylpropanoid biosynthesis(lactoperoxidase[ec:1.11.1.7])
TR29752|c2_g1_i2	354	1.07226e-08	54	57.3806	12656880	PttB	Petunia x hybrida	NA	NA	NA	NA	NA
TR41296|c1_g6_i1	263	1.33234e-49	94	164.851	12697492	p-type H+-ATPase	Sesbania rostrata	NA	NA	nucleotide binding[GO:0000166]	integral component of membrane[GO:0016021]	NA
TR34949|c1_g5_i1	245	6.98607e-51	98	167.933	12697496	p-type H+-ATPase	Sesbania rostrata	NA	NA	nucleotide binding[GO:0000166]	integral component of membrane[GO:0016021]	NA
TR28969|c0_g1_i1	985	7.8451e-107	88	319.701	13183179	AF240007_1cystatin	Sesamum indicum	NA	negative regulation of endopeptidase activity[GO:0010951]	cysteine-type endopeptidase inhibitor activity[GO:0004869]	NA	NA
TR38245|c0_g2_i1	287	7.55921e-61	98	189.889	13277214	fructose-bisphosphate aldolase	Flaveria trinervia	NA	glycolytic process[GO:0006096]	fructose-bisphosphate aldolase activity[GO:0004332]	NA	map00030:Pentose phosphate pathway(aldolase[ec:4.1.2.13]) ; map01130:Biosynthesis of antibiotics(aldolase[ec:4.1.2.13]) ; map00051:Fructose and mannose metabolism(aldolase[ec:4.1.2.13]) ; map00710:Carbon fixation in photosynthetic organisms(aldolase[ec:4.1.2.13]) ; map00010:Glycolysis / Gluconeogenesis(aldolase[ec:4.1.2.13]) ; map00680:Methane metabolism(aldolase[ec:4.1.2.13])
TR37845|c1_g3_i1	322	9.49272e-53	98	177.563	13491752	AF242373_1cysteine protease	Ipomoea batatas	NA	proteolysis[GO:0006508]	cysteine-type peptidase activity[GO:0008234]	NA	NA
TR32211|c0_g3_i3	290	3.83635e-42	94	145.976	13958130	AF363286_1aluminium induced protein	Avicennia marina	NA	NA	NA	NA	NA
TR40650|c0_g2_i6	351	1.41416e-66	98	217.624	13959067	AF363285_1mitochondrial processing peptidase	Avicennia marina	NA	proteolysis[GO:0006508]	metal ion binding[GO:0046872] ; metalloendopeptidase activity[GO:0004222]	NA	NA
TR4018|c1_g5_i7	330	9.62694e-34	100	122.094	14190445	AF378900_1At2g04520/T1O3.7	Arabidopsis thaliana	NA	NA	NA	NA	NA
TR36710|c0_g2_i4	1576	0	93	531.561	14270085	putative regulatory protein in anthocyanin biosynthesis	Perilla frutescens	Lamiaceae	multicellular organismal development[GO:0007275]	NA	NA	NA
TR31001|c0_g2_i1	989	0	92	542.732	14278925	flavonoid 3'-hydroxylase	Perilla frutescens var. crispa	NA	oxidation-reduction process[GO:0055114]	heme binding[GO:0020037] ; oxidoreductase activity, acting on paired donors, with incorporation or reduction of molecular oxygen[GO:0016705] ; monooxygenase activity[GO:0004497] ; iron ion binding[GO:0005506]	integral component of membrane[GO:0016021]	NA
TR39062|c0_g1_i3	1856	0	88	804.283	14423323	elicitor-inducible cytochrome P450	Nicotiana tabacum	NA	oxidation-reduction process[GO:0055114]	heme binding[GO:0020037] ; oxidoreductase activity, acting on paired donors, with incorporation or reduction of molecular oxygen[GO:0016705] ; monooxygenase activity[GO:0004497] ; iron ion binding[GO:0005506]	integral component of membrane[GO:0016021]	NA
TR39062|c0_g1_i4	245	3.0911e-44	92	156.377	14423325	elicitor-inducible cytochrome P450	Nicotiana tabacum	NA	oxidation-reduction process[GO:0055114]	heme binding[GO:0020037] ; oxidoreductase activity, acting on paired donors, with incorporation or reduction of molecular oxygen[GO:0016705] ; monooxygenase activity[GO:0004497] ; iron ion binding[GO:0005506]	NA	NA
TR37474|c1_g6_i3	518	1.18259e-121	99	350.132	14423458	AF386966_1casein kinase II alpha subunit	Arabidopsis thaliana	NA	NA	NA	NA	NA
TR7520|c0_g1_i1	300	6.82472e-47	97	154.836	14423898	RL31_PERFRRecName: Full=60S ribosomal protein L31	Perilla frutescens	Lamiaceae	translation[GO:0006412]	structural constituent of ribosome[GO:0003735]	ribosome[GO:0005840]	NA
TR7520|c0_g1_i2	310	5.58651e-33	98	119.013	14423898	RL31_PERFRRecName: Full=60S ribosomal protein L31	Perilla frutescens	Lamiaceae	translation[GO:0006412]	structural constituent of ribosome[GO:0003735]	ribosome[GO:0005840]	NA
TR21949|c0_g1_i1	258	1.25782e-31	97	115.161	14423898	RL31_PERFRRecName: Full=60S ribosomal protein L31	Perilla frutescens	Lamiaceae	translation[GO:0006412]	structural constituent of ribosome[GO:0003735]	ribosome[GO:0005840]	NA
TR21949|c0_g3_i1	382	5.64862e-31	97	115.161	14423898	RL31_PERFRRecName: Full=60S ribosomal protein L31	Perilla frutescens	Lamiaceae	translation[GO:0006412]	structural constituent of ribosome[GO:0003735]	ribosome[GO:0005840]	NA
TR32504|c2_g6_i1	474	5.89877e-44	100	149.058	14488268	actin	Ipomoea nil	NA	NA	NA	NA	NA
TR32504|c2_g3_i1	420	5.37086e-36	100	127.872	14488268	actin	Ipomoea nil	NA	NA	NA	NA	NA
TR32504|c2_g5_i1	343	2.62429e-34	100	122.479	14488268	actin	Ipomoea nil	NA	NA	NA	NA	NA
TR21829|c0_g1_i1	618	1.04518e-124	96	371.318	14548095	INO1_SESINRecName: Full=Inositol-3-phosphate synthase; Short=MIP synthase; AltName: Full=Myo-inositol 1-phosphate synthase; Short=IPS; Short=MI-1-P synthase	Sesamum indicum	NA	phospholipid biosynthetic process[GO:0008654] ; inositol biosynthetic process[GO:0006021]	inositol-3-phosphate synthase activity[GO:0004512]	cytoplasm[GO:0005737]	map01130:Biosynthesis of antibiotics(synthase[ec:5.5.1.4]) ; map00562:Inositol phosphate metabolism(synthase[ec:5.5.1.4]) ; map00521:Streptomycin biosynthesis(synthase[ec:5.5.1.4])
TR25685|c0_g1_i1	418	8.0475e-97	100	284.263	14585885	V-type H+-ATPase subunit A	Pisum sativum	NA	NA	ATP binding[GO:0005524]	NA	NA
TR2796|c0_g1_i1	1055	1.10753e-11	83	69.707	14588999	putative dehydrin	Helianthus ciliaris	NA	response to stress[GO:0006950] ; response to water[GO:0009415]	NA	NA	NA
TR31264|c0_g3_i1	293	1.17375e-12	86	67.0106	14594817	thaumatin like protein	Beta vulgaris	NA	NA	NA	NA	NA
TR39653|c0_g9_i1	481	2.36665e-59	97	199.519	14787784	FtsZ-like protein	Nicotiana tabacum	NA	metabolic process[GO:0008152]	GTP binding[GO:0005525] ; GTPase activity[GO:0003924]	chloroplast[GO:0009507]	NA
TR33133|c0_g10_i2	387	3.33121e-16	86	75.8702	15021578	AF362735_1succinate dehydrogenase subunit 4	Solanum lycopersicum	NA	NA	NA	integral component of membrane[GO:0016021] ; mitochondrion[GO:0005739]	NA
TR33133|c0_g3_i1	451	2.29852e-15	86	74.3294	15021578	AF362735_1succinate dehydrogenase subunit 4	Solanum lycopersicum	NA	NA	NA	integral component of membrane[GO:0016021] ; mitochondrion[GO:0005739]	NA
TR44720|c0_g1_i1	276	4.2612e-58	98	192.2	15208461	AF272756_1kinesin heavy chain	Zea mays	NA	microtubule-based movement[GO:0007018] ; metabolic process[GO:0008152]	microtubule binding[GO:0008017] ; ATP binding[GO:0005524] ; microtubule motor activity[GO:0003777]	kinesin complex[GO:0005871] ; microtubule[GO:0005874]	NA
TR44720|c0_g4_i2	346	8.13301e-53	95	179.489	15208461	AF272756_1kinesin heavy chain	Zea mays	NA	microtubule-based movement[GO:0007018] ; metabolic process[GO:0008152]	microtubule binding[GO:0008017] ; ATP binding[GO:0005524] ; microtubule motor activity[GO:0003777]	kinesin complex[GO:0005871] ; microtubule[GO:0005874]	NA
TR41025|c1_g1_i5	691	2.55512e-33	86	89.3521	15217780	Sphingosine-1-phosphate lyase	Arabidopsis thaliana	NA	sphingolipid catabolic process[GO:0030149] ; cellular amino acid metabolic process[GO:0006520]	pyridoxal phosphate binding[GO:0030170] ; carboxy-lyase activity[GO:0016831]	membrane[GO:0016020] ; endoplasmic reticulum[GO:0005783]	NA
TR3924|c0_g4_i4	338	6.78466e-32	100	117.472	15223948	putative histone H2AXa	Arabidopsis thaliana	NA	chromatin silencing[GO:0006342]	DNA binding[GO:0003677]	nuclear chromatin[GO:0000790]	NA
TR35479|c0_g12_i1	326	5.48362e-15	100	75.8702	15226264	UDP-D-apiose/UDP-D-xylose synthase 1	Arabidopsis thaliana	NA	nucleotide-sugar biosynthetic process[GO:0009226]	UDP-glucuronate decarboxylase activity[GO:0048040] ; NAD binding[GO:0051287]	nucleus[GO:0005634] ; cytosol[GO:0005829]	map00500:Starch and sucrose metabolism(decarboxylase[ec:4.1.1.35]) ; map00520:Amino sugar and nucleotide sugar metabolism(decarboxylase[ec:4.1.1.35])
TR22124|c0_g1_i1	665	4.34594e-06	83	51.2174	15229057	Remorin-like protein	Arabidopsis thaliana	NA	NA	NA	NA	NA
TR41969|c0_g6_i1	425	1.11235e-15	61	78.9518	15232389	NIMA-related kinase 5	Arabidopsis thaliana	NA	NA	NA	NA	NA
TR38900|c0_g1_i6	1196	2.22429e-141	77	423.705	15237659	dicarboxylate transport 2.1	Arabidopsis thaliana	NA	ammonia assimilation cycle[GO:0019676] ; malate transmembrane transport[GO:0071423] ; oxaloacetate(2-) transmembrane transport[GO:1902356] ; L-glutamate transmembrane transport[GO:0089711] ; response to nematode[GO:0009624]	oxaloacetate transmembrane transporter activity[GO:0015131] ; oxoglutarate:malate antiporter activity[GO:0015367] ; L-glutamate transmembrane transporter activity[GO:0005313]	integral component of membrane[GO:0016021] ; chloroplast envelope[GO:0009941] ; chloroplast thylakoid[GO:0009534]	NA
TR3315|c0_g2_i2	583	4.70641e-32	85	120.553	15240191	protein ralf-like 34	Arabidopsis thaliana	NA	cell-cell signaling[GO:0007267] ; calcium-mediated signaling[GO:0019722]	signal transducer activity[GO:0004871]	plasmodesma[GO:0009506] ; apoplast[GO:0048046]	NA
TR30952|c2_g1_i8	961	9.51443e-73	63	249.595	15617438	TdcA1-ORF1-ORF2	Daucus carota	NA	NA	NA	NA	NA
TR42761|c0_g3_i1	257	4.61906e-46	97	158.688	16025105	NADP-dependent malic enzyme	Flaveria brownii	NA	malate metabolic process[GO:0006108] ; oxidation-reduction process[GO:0055114]	NAD binding[GO:0051287] ; metal ion binding[GO:0046872] ; malate dehydrogenase (decarboxylating) (NAD+) activity[GO:0004471]	NA	map00620:Pyruvate metabolism(dehydrogenase (decarboxylating)[ec:1.1.1.39]) ; map00620:Pyruvate metabolism(dehydrogenase (oxaloacetate-decarboxylating)[ec:1.1.1.38]) ; map00710:Carbon fixation in photosynthetic organisms(dehydrogenase (decarboxylating)[ec:1.1.1.39])
TR9940|c0_g1_i1	235	6.9274e-46	100	154.451	16417952	AF429387_1truncated acetyl Co-A acetyltransferase-like protein	Hevea brasiliensis	NA	metabolic process[GO:0008152]	transferase activity, transferring acyl groups other than amino-acyl groups[GO:0016747]	NA	NA
TR41088|c0_g9_i1	233	1.03173e-45	98	154.066	16417952	AF429387_1truncated acetyl Co-A acetyltransferase-like protein	Hevea brasiliensis	NA	metabolic process[GO:0008152]	transferase activity, transferring acyl groups other than amino-acyl groups[GO:0016747]	NA	NA
TR41088|c0_g1_i1	231	9.77127e-44	98	149.058	16417952	AF429387_1truncated acetyl Co-A acetyltransferase-like protein	Hevea brasiliensis	NA	metabolic process[GO:0008152]	transferase activity, transferring acyl groups other than amino-acyl groups[GO:0016747]	NA	NA
TR32527|c3_g4_i2	693	1.36822e-112	84	341.273	16555877	cinnamic acid 4-hydroxylase	Lithospermum erythrorhizon	NA	oxidation-reduction process[GO:0055114]	heme binding[GO:0020037] ; oxidoreductase activity, acting on paired donors, with incorporation or reduction of molecular oxygen[GO:0016705] ; monooxygenase activity[GO:0004497] ; iron ion binding[GO:0005506]	integral component of membrane[GO:0016021]	NA
TR41819|c3_g5_i2	230	1.0213e-23	98	99.3673	16555877	cinnamic acid 4-hydroxylase	Lithospermum erythrorhizon	NA	oxidation-reduction process[GO:0055114]	heme binding[GO:0020037] ; oxidoreductase activity, acting on paired donors, with incorporation or reduction of molecular oxygen[GO:0016705] ; monooxygenase activity[GO:0004497] ; iron ion binding[GO:0005506]	integral component of membrane[GO:0016021]	NA
TR44612|c2_g2_i1	376	8.49594e-80	96	248.825	16588669	AF314923_1phosphoenolpyruvate carboxylase housekeeping isozyme pepc2	Phaseolus vulgaris	NA	tricarboxylic acid cycle[GO:0006099] ; carbon fixation[GO:0015977]	phosphoenolpyruvate carboxylase activity[GO:0008964]	NA	map00720:Carbon fixation pathways in prokaryotes(carboxylase[ec:4.1.1.31]) ; map00620:Pyruvate metabolism(carboxylase[ec:4.1.1.31]) ; map00710:Carbon fixation in photosynthetic organisms(carboxylase[ec:4.1.1.31]) ; map00680:Methane metabolism(carboxylase[ec:4.1.1.31])
TR38880|c0_g1_i7	1579	0	87	556.599	17224292	AF213481_1gamma-tocopherol methyltransferase	Perilla frutescens	Lamiaceae	methylation[GO:0032259] ; vitamin E biosynthetic process[GO:0010189]	2-methyl-6-phytyl-1,4-benzoquinone methyltransferase activity[GO:0051741]	NA	NA
TR38880|c0_g2_i1	362	1.21061e-30	74	119.398	17224292	AF213481_1gamma-tocopherol methyltransferase	Perilla frutescens	Lamiaceae	metabolic process[GO:0008152]	methyltransferase activity[GO:0008168]	NA	NA
TR38880|c0_g4_i1	239	1.83791e-30	75	117.087	17224292	AF213481_1gamma-tocopherol methyltransferase	Perilla frutescens	Lamiaceae	metabolic process[GO:0008152]	methyltransferase activity[GO:0008168]	NA	NA
TR40855|c1_g3_i4	493	4.08146e-65	93	211.075	17225488	phosphoenolpyruvate carboxykinase	Solanum lycopersicum	NA	gluconeogenesis[GO:0006094] ; phosphorylation[GO:0016310]	kinase activity[GO:0016301] ; phosphoenolpyruvate carboxykinase (ATP) activity[GO:0004612] ; ATP binding[GO:0005524]	NA	map01130:Biosynthesis of antibiotics(carboxykinase (ATP)[ec:4.1.1.49]) ; map00020:Citrate cycle (TCA cycle)(carboxykinase (ATP)[ec:4.1.1.49]) ; map00620:Pyruvate metabolism(carboxykinase (ATP)[ec:4.1.1.49]) ; map00710:Carbon fixation in photosynthetic organisms(carboxykinase (ATP)[ec:4.1.1.49]) ; map00010:Glycolysis / Gluconeogenesis(carboxykinase (ATP)[ec:4.1.1.49])
TR40046|c1_g11_i1	823	2.3558e-160	93	462.611	17366672	HPPD_SOLSCRecName: Full=4-hydroxyphenylpyruvate dioxygenase; AltName: Full=4-hydroxyphenylpyruvic acid oxidase; Short=4HPPD; Short=HPD; Short=HPPDase	Plectranthus scutellarioides	Lamiaceae	tyrosine catabolic process[GO:0006572] ; L-phenylalanine catabolic process[GO:0006559] ; oxidation-reduction process[GO:0055114]	metal ion binding[GO:0046872] ; 4-hydroxyphenylpyruvate dioxygenase activity[GO:0003868]	cytoplasm[GO:0005737]	map00130:Ubiquinone and other terpenoid-quinone biosynthesis(dioxygenase[ec:1.13.11.27]) ; map00350:Tyrosine metabolism(dioxygenase[ec:1.13.11.27]) ; map00360:Phenylalanine metabolism(dioxygenase[ec:1.13.11.27])
TR7505|c0_g1_i2	628	3.4025e-116	92	347.051	17366672	HPPD_SOLSCRecName: Full=4-hydroxyphenylpyruvate dioxygenase; AltName: Full=4-hydroxyphenylpyruvic acid oxidase; Short=4HPPD; Short=HPD; Short=HPPDase	Plectranthus scutellarioides	Lamiaceae	tyrosine catabolic process[GO:0006572] ; L-phenylalanine catabolic process[GO:0006559] ; oxidation-reduction process[GO:0055114]	metal ion binding[GO:0046872] ; 4-hydroxyphenylpyruvate dioxygenase activity[GO:0003868]	cytoplasm[GO:0005737]	map00130:Ubiquinone and other terpenoid-quinone biosynthesis(dioxygenase[ec:1.13.11.27]) ; map00350:Tyrosine metabolism(dioxygenase[ec:1.13.11.27]) ; map00360:Phenylalanine metabolism(dioxygenase[ec:1.13.11.27])
TR40046|c1_g8_i1	571	2.80329e-112	96	336.265	17366672	HPPD_SOLSCRecName: Full=4-hydroxyphenylpyruvate dioxygenase; AltName: Full=4-hydroxyphenylpyruvic acid oxidase; Short=4HPPD; Short=HPD; Short=HPPDase	Plectranthus scutellarioides	Lamiaceae	tyrosine catabolic process[GO:0006572] ; L-phenylalanine catabolic process[GO:0006559] ; oxidation-reduction process[GO:0055114]	metal ion binding[GO:0046872] ; 4-hydroxyphenylpyruvate dioxygenase activity[GO:0003868]	cytoplasm[GO:0005737]	map00130:Ubiquinone and other terpenoid-quinone biosynthesis(dioxygenase[ec:1.13.11.27]) ; map00350:Tyrosine metabolism(dioxygenase[ec:1.13.11.27]) ; map00360:Phenylalanine metabolism(dioxygenase[ec:1.13.11.27])
TR40046|c1_g5_i2	413	7.86882e-55	91	185.652	17366672	HPPD_SOLSCRecName: Full=4-hydroxyphenylpyruvate dioxygenase; AltName: Full=4-hydroxyphenylpyruvic acid oxidase; Short=4HPPD; Short=HPD; Short=HPPDase	Plectranthus scutellarioides	Lamiaceae	tyrosine catabolic process[GO:0006572] ; L-phenylalanine catabolic process[GO:0006559] ; oxidation-reduction process[GO:0055114]	metal ion binding[GO:0046872] ; 4-hydroxyphenylpyruvate dioxygenase activity[GO:0003868]	cytoplasm[GO:0005737]	map00130:Ubiquinone and other terpenoid-quinone biosynthesis(dioxygenase[ec:1.13.11.27]) ; map00350:Tyrosine metabolism(dioxygenase[ec:1.13.11.27]) ; map00360:Phenylalanine metabolism(dioxygenase[ec:1.13.11.27])
TR40046|c1_g7_i1	521	2.9584e-41	96	151.369	17366672	HPPD_SOLSCRecName: Full=4-hydroxyphenylpyruvate dioxygenase; AltName: Full=4-hydroxyphenylpyruvic acid oxidase; Short=4HPPD; Short=HPD; Short=HPPDase	Plectranthus scutellarioides	Lamiaceae	tyrosine catabolic process[GO:0006572] ; L-phenylalanine catabolic process[GO:0006559] ; oxidation-reduction process[GO:0055114]	metal ion binding[GO:0046872] ; 4-hydroxyphenylpyruvate dioxygenase activity[GO:0003868]	cytoplasm[GO:0005737]	map00130:Ubiquinone and other terpenoid-quinone biosynthesis(dioxygenase[ec:1.13.11.27]) ; map00350:Tyrosine metabolism(dioxygenase[ec:1.13.11.27]) ; map00360:Phenylalanine metabolism(dioxygenase[ec:1.13.11.27])
TR40046|c1_g7_i2	434	2.43354e-14	90	75.485	17366672	HPPD_SOLSCRecName: Full=4-hydroxyphenylpyruvate dioxygenase; AltName: Full=4-hydroxyphenylpyruvic acid oxidase; Short=4HPPD; Short=HPD; Short=HPPDase	Plectranthus scutellarioides	Lamiaceae	tyrosine catabolic process[GO:0006572] ; L-phenylalanine catabolic process[GO:0006559] ; oxidation-reduction process[GO:0055114]	metal ion binding[GO:0046872] ; 4-hydroxyphenylpyruvate dioxygenase activity[GO:0003868]	cytoplasm[GO:0005737]	map00130:Ubiquinone and other terpenoid-quinone biosynthesis(dioxygenase[ec:1.13.11.27]) ; map00350:Tyrosine metabolism(dioxygenase[ec:1.13.11.27]) ; map00360:Phenylalanine metabolism(dioxygenase[ec:1.13.11.27])
TR43971|c0_g3_i1	354	1.35922e-69	95	216.853	17863981	AF448811_1unknown	Davidia involucrata	NA	NA	NA	integral component of membrane[GO:0016021]	NA
TR20436|c0_g1_i1	231	4.28134e-26	87	102.834	17863981	AF448811_1unknown	Davidia involucrata	NA	NA	NA	integral component of membrane[GO:0016021]	NA
TR43817|c0_g1_i4	348	1.90604e-80	99	256.914	17887381	receptor protein kinase-like protein	Capsicum annuum	NA	protein phosphorylation[GO:0006468]	ATP binding[GO:0005524] ; protein serine/threonine kinase activity[GO:0004674]	integral component of membrane[GO:0016021]	NA
TR33248|c1_g2_i3	691	4.13839e-70	77	221.09	18071490	auxin-induced AUX/IAA1	Antirrhinum majus	NA	cellular process[GO:0009987] ; regulation of cellular process[GO:0050794]	NA	NA	NA
TR33248|c1_g2_i2	742	1.72817e-65	68	209.92	18071490	auxin-induced AUX/IAA1	Antirrhinum majus	NA	NA	NA	NA	NA
TR30248|c0_g3_i5	246	8.26268e-48	93	157.918	18071490	auxin-induced AUX/IAA1	Antirrhinum majus	NA	auxin-activated signaling pathway[GO:0009734] ; regulation of transcription, DNA-templated[GO:0006355] ; transcription, DNA-templated[GO:0006351]	NA	nucleus[GO:0005634]	NA
TR30248|c0_g3_i2	390	5.06412e-37	75	132.109	18071490	auxin-induced AUX/IAA1	Antirrhinum majus	NA	cellular process[GO:0009987] ; regulation of cellular process[GO:0050794]	NA	NA	NA
TR33248|c1_g2_i6	412	2.25102e-34	71	125.561	18071490	auxin-induced AUX/IAA1	Antirrhinum majus	NA	NA	NA	NA	NA
TR40006|c0_g3_i1	248	5.34386e-50	96	165.622	18073650	phosphoenolpyruvate carboxylase	Cupressus sp. HHG-2001	NA	tricarboxylic acid cycle[GO:0006099] ; carbon fixation[GO:0015977]	phosphoenolpyruvate carboxylase activity[GO:0008964]	NA	map00720:Carbon fixation pathways in prokaryotes(carboxylase[ec:4.1.1.31]) ; map00620:Pyruvate metabolism(carboxylase[ec:4.1.1.31]) ; map00710:Carbon fixation in photosynthetic organisms(carboxylase[ec:4.1.1.31]) ; map00680:Methane metabolism(carboxylase[ec:4.1.1.31])
TR40732|c0_g5_i1	291	3.63727e-25	84	104.76	18087513	AF462795_1AT5g18480/F20L16_200	Arabidopsis thaliana	NA	NA	NA	NA	NA
TR39196|c0_g1_i4	338	1.06881e-73	96	226.868	18252917	fumarate hydratase	Arabidopsis thaliana	NA	NA	NA	NA	NA
TR26108|c0_g1_i5	843	6.87221e-141	90	407.142	18377609	putative UV-damaged DNA binding factor	Arabidopsis thaliana	NA	NA	NA	NA	NA
TR30450|c0_g1_i7	318	2.32585e-18	91	81.2629	18403201	transmembrane protein 14C	Arabidopsis thaliana	NA	NA	NA	integral component of membrane[GO:0016021] ; mitochondrion[GO:0005739]	NA
TR40691|c0_g6_i1	803	7.48948e-111	89	333.569	18653911	L78468_1acyl-ACP thioesterase	Perilla frutescens	Lamiaceae	fatty acid biosynthetic process[GO:0006633]	thiolester hydrolase activity[GO:0016790]	chloroplast[GO:0009507]	NA
TR40691|c0_g6_i5	281	5.14806e-52	93	174.866	18653911	L78468_1acyl-ACP thioesterase	Perilla frutescens	Lamiaceae	fatty acid biosynthetic process[GO:0006633]	thiolester hydrolase activity[GO:0016790]	chloroplast[GO:0009507]	NA
TR40691|c0_g6_i3	318	1.05053e-50	86	172.17	18653911	L78468_1acyl-ACP thioesterase	Perilla frutescens	Lamiaceae	fatty acid biosynthetic process[GO:0006633]	thiolester hydrolase activity[GO:0016790]	chloroplast[GO:0009507]	NA
TR2768|c1_g2_i2	287	2.70303e-55	100	182.57	19172403	AF479058_170 kDa heat shock protein	Sandersonia aurantiaca	NA	NA	ATP binding[GO:0005524]	NA	NA
TR44558|c1_g7_i1	379	4.60685e-74	99	234.187	19352041	auxin response factor 6a	Oryza sativa	NA	auxin-activated signaling pathway[GO:0009734] ; regulation of transcription, DNA-templated[GO:0006355] ; transcription, DNA-templated[GO:0006351]	DNA binding[GO:0003677]	nucleus[GO:0005634]	NA
TR43370|c0_g1_i1	300	1.16744e-55	98	185.267	19352041	auxin response factor 6a	Oryza sativa	NA	auxin-activated signaling pathway[GO:0009734] ; regulation of transcription, DNA-templated[GO:0006355] ; transcription, DNA-templated[GO:0006351]	DNA binding[GO:0003677]	nucleus[GO:0005634]	NA
TR43370|c0_g5_i1	300	4.70273e-55	99	183.726	19352041	auxin response factor 6a	Oryza sativa	NA	auxin-activated signaling pathway[GO:0009734] ; regulation of transcription, DNA-templated[GO:0006355] ; transcription, DNA-templated[GO:0006351]	DNA binding[GO:0003677]	nucleus[GO:0005634]	NA
TR40516|c0_g2_i1	1619	0	89	834.713	19571727	stachyose synthase	Stachys affinis	Lamiaceae	metabolic process[GO:0008152]	galactinol-raffinose galactosyltransferase activity[GO:0047268]	NA	map00052:Galactose metabolism(galactosyltransferase[ec:2.4.1.67])
TR25718|c0_g1_i2	1956	0	90	970.689	19571727	stachyose synthase	Stachys affinis	Lamiaceae	metabolic process[GO:0008152]	galactinol-raffinose galactosyltransferase activity[GO:0047268]	NA	map00052:Galactose metabolism(galactosyltransferase[ec:2.4.1.67])
TR26147|c0_g1_i1	986	5.66769e-154	93	462.996	19571727	stachyose synthase	Stachys affinis	Lamiaceae	metabolic process[GO:0008152]	galactinol-raffinose galactosyltransferase activity[GO:0047268]	NA	map00052:Galactose metabolism(galactosyltransferase[ec:2.4.1.67])
TR26147|c0_g1_i2	456	1.28974e-88	95	284.263	19571727	stachyose synthase	Stachys affinis	Lamiaceae	metabolic process[GO:0008152]	galactinol-raffinose galactosyltransferase activity[GO:0047268]	NA	map00052:Galactose metabolism(galactosyltransferase[ec:2.4.1.67])
TR41636|c0_g3_i2	585	8.16473e-120	98	348.591	19698472	SERK3	Helianthus annuus	NA	protein phosphorylation[GO:0006468]	transmembrane receptor protein kinase activity[GO:0019199] ; ATP binding[GO:0005524] ; protein serine/threonine kinase activity[GO:0004674]	integral component of membrane[GO:0016021]	NA
TR36725|c0_g4_i3	311	1.1181e-23	97	97.8265	19913111	dicarboxylate/tricarboxylate carrier	Nicotiana tabacum	NA	transport[GO:0006810]	NA	integral component of membrane[GO:0016021] ; mitochondrion[GO:0005739]	NA
TR36725|c0_g4_i12	350	1.7464e-23	97	97.8265	19913111	dicarboxylate/tricarboxylate carrier	Nicotiana tabacum	NA	transport[GO:0006810]	NA	integral component of membrane[GO:0016021] ; mitochondrion[GO:0005739]	NA
TR19902|c0_g1_i1	224	7.47505e-49	98	163.696	20068275	cyclin-dependent kinase	Juglans nigra x Juglans regia	NA	protein phosphorylation[GO:0006468]	protein kinase activity[GO:0004672] ; ATP binding[GO:0005524]	NA	NA
TR40470|c0_g2_i1	290	2.51285e-49	97	162.925	20139964	RS7_AVIMRRecName: Full=40S ribosomal protein S7	Avicennia marina	NA	translation[GO:0006412]	structural constituent of ribosome[GO:0003735]	ribosome[GO:0005840]	NA
TR33118|c0_g1_i6	733	2.11658e-81	96	252.677	20149054	putative expansin	Capsicum annuum	NA	plant-type cell wall organization[GO:0009664]	NA	extracellular region[GO:0005576] ; cell wall[GO:0005618] ; membrane[GO:0016020]	NA
TR33118|c0_g1_i3	350	4.34559e-65	98	205.682	20149054	putative expansin	Capsicum annuum	NA	plant-type cell wall organization[GO:0009664]	NA	extracellular region[GO:0005576] ; cell wall[GO:0005618] ; membrane[GO:0016020]	NA
TR40006|c0_g2_i4	672	3.34569e-92	94	278.1	20302419	phosphoenolpyruvate carboxylase	Cucumis sativus	NA	tricarboxylic acid cycle[GO:0006099] ; carbon fixation[GO:0015977]	phosphoenolpyruvate carboxylase activity[GO:0008964]	NA	map00720:Carbon fixation pathways in prokaryotes(carboxylase[ec:4.1.1.31]) ; map00620:Pyruvate metabolism(carboxylase[ec:4.1.1.31]) ; map00710:Carbon fixation in photosynthetic organisms(carboxylase[ec:4.1.1.31]) ; map00680:Methane metabolism(carboxylase[ec:4.1.1.31])
TR7852|c2_g5_i2	1096	0	98	731.48	20453062	AT3g08530/T8G24_1	Arabidopsis thaliana	NA	NA	NA	NA	NA
TR43009|c2_g8_i3	290	8.35718e-61	100	190.274	20502888	AF500588_1heat shock protein 80	Solanum tuberosum	NA	protein folding[GO:0006457] ; response to stress[GO:0006950]	ATP binding[GO:0005524] ; unfolded protein binding[GO:0051082]	NA	NA
TR41674|c0_g9_i1	243	7.12931e-35	96	130.954	21063925	plastidic ATP/ADP transporter	Citrus hybrid cultivar	NA	ATP transport[GO:0015867] ; ADP transport[GO:0015866]	ATP:ADP antiporter activity[GO:0005471] ; ATP binding[GO:0005524]	integral component of membrane[GO:0016021] ; plastid[GO:0009536]	NA
TR41847|c0_g4_i1	409	1.5594e-58	94	189.119	21326129	putative UDP-glucose dehydrogenase	Sorghum bicolor	NA	polysaccharide biosynthetic process[GO:0000271] ; oxidation-reduction process[GO:0055114]	oxidoreductase activity, acting on the CH-CH group of donors, NAD or NADP as acceptor[GO:0016628] ; NAD binding[GO:0051287] ; oxidoreductase activity, acting on the CH-OH group of donors, NAD or NADP as acceptor[GO:0016616]	NA	NA
TR41697|c0_g3_i1	317	2.66179e-32	83	125.561	21435938	AF515434_1PIN1-like auxin transport protein	Populus tremula x Populus tremuloides	NA	transmembrane transport[GO:0055085] ; auxin-activated signaling pathway[GO:0009734]	NA	integral component of membrane[GO:0016021]	NA
TR43027|c4_g4_i1	380	5.17619e-05	60	44.2838	21553876	unknown	Arabidopsis thaliana	NA	NA	NA	NA	NA
TR35109|c1_g1_i1	255	4.50443e-16	100	75.8702	21592968	unknown	Arabidopsis thaliana	NA	NA	NA	NA	NA
TR35347|c1_g2_i9	347	1.56704e-73	98	227.254	21593387	nucleoside diphosphate kinase 3 (ndpk3)	Arabidopsis thaliana	NA	NA	NA	NA	NA
TR44652|c1_g3_i2	497	1.48436e-102	95	306.22	21715878	proton-exporting ATPase	Zea mays	NA	ATP biosynthetic process[GO:0006754] ; hydrogen ion transmembrane transport[GO:1902600]	hydrogen-exporting ATPase activity, phosphorylative mechanism[GO:0008553] ; metal ion binding[GO:0046872] ; ATP binding[GO:0005524]	integral component of membrane[GO:0016021]	map00190:Oxidative phosphorylation(ATPase[ec:3.6.3.6])
TR2216|c1_g4_i7	752	2.65263e-85	97	265.388	22135892	putative casein kinase	Arabidopsis thaliana	NA	NA	NA	NA	NA
TR2216|c1_g5_i1	230	1.10895e-47	100	160.999	22135892	putative casein kinase	Arabidopsis thaliana	NA	NA	NA	NA	NA
TR37770|c0_g1_i3	1854	0	96	962.214	22208544	asparagine synthetase	Striga hermonthica	NA	asparagine biosynthetic process[GO:0006529]	asparagine synthase (glutamine-hydrolyzing) activity[GO:0004066]	NA	map00250:Alanine, aspartate and glutamate metabolism(synthase (glutamine-hydrolysing)[ec:6.3.5.4])
TR44301|c1_g9_i1	547	1.36765e-111	92	330.102	22531106	putative phosphatidylinositol-4-phosphate-5-kinase	Arabidopsis thaliana	NA	NA	NA	NA	NA
TR33814|c0_g4_i1	1477	0	99	969.533	22651519	p-coumaroyl shikimate 3'-hydroxylase isoform 1	Ocimum basilicum	Lamiaceae	oxidation-reduction process[GO:0055114]	heme binding[GO:0020037] ; oxidoreductase activity, acting on paired donors, with incorporation or reduction of molecular oxygen[GO:0016705] ; monooxygenase activity[GO:0004497] ; iron ion binding[GO:0005506]	NA	NA
TR33814|c0_g5_i1	434	6.00066e-16	100	80.4925	22651519	p-coumaroyl shikimate 3'-hydroxylase isoform 1	Ocimum basilicum	Lamiaceae	oxidation-reduction process[GO:0055114]	heme binding[GO:0020037] ; oxidoreductase activity, acting on paired donors, with incorporation or reduction of molecular oxygen[GO:0016705] ; monooxygenase activity[GO:0004497] ; iron ion binding[GO:0005506]	NA	NA
TR35082|c0_g1_i3	1632	9.32103e-139	80	422.935	22652119	AF406699_1BEL1-related homeotic protein 13	Solanum tuberosum	NA	regulation of transcription, DNA-templated[GO:0006355]	DNA binding[GO:0003677]	nucleus[GO:0005634]	NA
TR32745|c0_g2_i5	260	5.53209e-44	98	147.902	23452335	alpha-tubulin 2	Gossypium hirsutum	NA	microtubule-based process[GO:0007017] ; metabolic process[GO:0008152]	structural constituent of cytoskeleton[GO:0005200] ; GTP binding[GO:0005525] ; GTPase activity[GO:0003924]	microtubule[GO:0005874]	NA
TR33627|c1_g7_i1	349	5.82907e-17	100	78.5666	25553586	ribosomal protein S18-like	Oryza sativa Japonica Group	NA	translation[GO:0006412]	structural constituent of ribosome[GO:0003735] ; RNA binding[GO:0003723]	ribosome[GO:0005840]	NA
TR8238|c0_g6_i1	287	2.59246e-55	96	178.333	25990051	arginine decarboxylase	Betula pendula	NA	arginine catabolic process[GO:0006527] ; spermidine biosynthetic process[GO:0008295]	arginine decarboxylase activity[GO:0008792]	NA	map00330:Arginine and proline metabolism(decarboxylase[ec:4.1.1.19])
TR30464|c0_g1_i1	399	4.77789e-29	92	110.923	26451578	putative 50S ribosomal protein L17	Arabidopsis thaliana	NA	NA	NA	NA	NA
TR30552|c0_g3_i1	255	2.34415e-09	92	55.4546	26452268	putative chaperonin 60 beta	Arabidopsis thaliana	NA	NA	NA	NA	NA
TR37878|c0_g1_i3	311	1.21655e-67	100	209.92	27362885	HSP70	Populus alba	NA	NA	NA	NA	NA
TR37878|c0_g1_i2	284	6.91595e-60	98	189.504	27362885	HSP70	Populus alba	NA	NA	NA	NA	NA
TR38023|c0_g3_i1	296	2.04251e-62	97	197.978	27371880	plasma membrane H+ ATPase	Populus alba	NA	NA	nucleotide binding[GO:0000166]	integral component of membrane[GO:0016021]	NA
TR41104|c2_g3_i2	1695	0	97	808.52	27525396	tyrosine aminotransferase	Solenostemon scutellarioides	NA	cellular amino acid metabolic process[GO:0006520] ; biosynthetic process[GO:0009058]	pyridoxal phosphate binding[GO:0030170] ; L-tyrosine:2-oxoglutarate aminotransferase activity[GO:0004838] ; L-phenylalanine:2-oxoglutarate aminotransferase activity[GO:0080130]	NA	map00130:Ubiquinone and other terpenoid-quinone biosynthesis(transaminase[ec:2.6.1.5]) ; map00350:Tyrosine metabolism(transaminase[ec:2.6.1.57]) ; map00350:Tyrosine metabolism(transaminase[ec:2.6.1.9]) ; map00350:Tyrosine metabolism(transaminase[ec:2.6.1.5]) ; map00350:Tyrosine metabolism(transaminase[ec:2.6.1.1]) ; map00220:Arginine biosynthesis(transaminase[ec:2.6.1.1]) ; map00950:Isoquinoline …
TR41104|c1_g2_i3	490	7.70961e-111	97	330.487	27525396	tyrosine aminotransferase	Solenostemon scutellarioides	NA	cellular amino acid metabolic process[GO:0006520] ; biosynthetic process[GO:0009058]	pyridoxal phosphate binding[GO:0030170] ; L-tyrosine:2-oxoglutarate aminotransferase activity[GO:0004838] ; L-phenylalanine:2-oxoglutarate aminotransferase activity[GO:0080130]	NA	map00130:Ubiquinone and other terpenoid-quinone biosynthesis(transaminase[ec:2.6.1.5]) ; map00350:Tyrosine metabolism(transaminase[ec:2.6.1.57]) ; map00350:Tyrosine metabolism(transaminase[ec:2.6.1.9]) ; map00350:Tyrosine metabolism(transaminase[ec:2.6.1.5]) ; map00350:Tyrosine metabolism(transaminase[ec:2.6.1.1]) ; map00220:Arginine biosynthesis(transaminase[ec:2.6.1.1]) ; map00950:Isoquinoline …
TR41104|c2_g3_i3	343	1.76879e-70	98	224.942	27525396	tyrosine aminotransferase	Solenostemon scutellarioides	NA	cellular amino acid metabolic process[GO:0006520] ; biosynthetic process[GO:0009058]	pyridoxal phosphate binding[GO:0030170] ; L-tyrosine:2-oxoglutarate aminotransferase activity[GO:0004838] ; L-phenylalanine:2-oxoglutarate aminotransferase activity[GO:0080130]	NA	map00130:Ubiquinone and other terpenoid-quinone biosynthesis(transaminase[ec:2.6.1.5]) ; map00350:Tyrosine metabolism(transaminase[ec:2.6.1.57]) ; map00350:Tyrosine metabolism(transaminase[ec:2.6.1.9]) ; map00350:Tyrosine metabolism(transaminase[ec:2.6.1.5]) ; map00350:Tyrosine metabolism(transaminase[ec:2.6.1.1]) ; map00220:Arginine biosynthesis(transaminase[ec:2.6.1.1]) ; map00950:Isoquinoline …
TR41104|c2_g4_i1	448	2.7382e-62	97	205.297	27525396	tyrosine aminotransferase	Solenostemon scutellarioides	NA	cellular amino acid metabolic process[GO:0006520] ; biosynthetic process[GO:0009058]	pyridoxal phosphate binding[GO:0030170] ; L-tyrosine:2-oxoglutarate aminotransferase activity[GO:0004838] ; L-phenylalanine:2-oxoglutarate aminotransferase activity[GO:0080130]	NA	map00130:Ubiquinone and other terpenoid-quinone biosynthesis(transaminase[ec:2.6.1.5]) ; map00350:Tyrosine metabolism(transaminase[ec:2.6.1.57]) ; map00350:Tyrosine metabolism(transaminase[ec:2.6.1.9]) ; map00350:Tyrosine metabolism(transaminase[ec:2.6.1.5]) ; map00350:Tyrosine metabolism(transaminase[ec:2.6.1.1]) ; map00220:Arginine biosynthesis(transaminase[ec:2.6.1.1]) ; map00950:Isoquinoline …
TR41104|c2_g1_i2	384	1.86976e-47	100	165.622	27525396	tyrosine aminotransferase	Solenostemon scutellarioides	NA	cellular amino acid metabolic process[GO:0006520] ; biosynthetic process[GO:0009058]	pyridoxal phosphate binding[GO:0030170] ; L-tyrosine:2-oxoglutarate aminotransferase activity[GO:0004838] ; L-phenylalanine:2-oxoglutarate aminotransferase activity[GO:0080130]	NA	map00130:Ubiquinone and other terpenoid-quinone biosynthesis(transaminase[ec:2.6.1.5]) ; map00350:Tyrosine metabolism(transaminase[ec:2.6.1.57]) ; map00350:Tyrosine metabolism(transaminase[ec:2.6.1.9]) ; map00350:Tyrosine metabolism(transaminase[ec:2.6.1.5]) ; map00350:Tyrosine metabolism(transaminase[ec:2.6.1.1]) ; map00220:Arginine biosynthesis(transaminase[ec:2.6.1.1]) ; map00950:Isoquinoline …
TR41104|c2_g1_i1	246	1.22149e-12	97	68.1662	27525396	tyrosine aminotransferase	Solenostemon scutellarioides	NA	cellular amino acid metabolic process[GO:0006520] ; biosynthetic process[GO:0009058]	pyridoxal phosphate binding[GO:0030170] ; L-tyrosine:2-oxoglutarate aminotransferase activity[GO:0004838] ; L-phenylalanine:2-oxoglutarate aminotransferase activity[GO:0080130]	NA	map00130:Ubiquinone and other terpenoid-quinone biosynthesis(transaminase[ec:2.6.1.5]) ; map00350:Tyrosine metabolism(transaminase[ec:2.6.1.57]) ; map00350:Tyrosine metabolism(transaminase[ec:2.6.1.9]) ; map00350:Tyrosine metabolism(transaminase[ec:2.6.1.5]) ; map00350:Tyrosine metabolism(transaminase[ec:2.6.1.1]) ; map00220:Arginine biosynthesis(transaminase[ec:2.6.1.1]) ; map00950:Isoquinoline …
TR8293|c0_g3_i3	567	3.37355e-82	90	263.077	27529828	serine protease-like protein	Nicotiana tabacum	NA	proteolysis[GO:0006508]	serine-type endopeptidase activity[GO:0004252]	NA	NA
TR11312|c0_g1_i1	454	8.51785e-45	74	157.532	27901694	AF478369_1gag-pol polyprotein	Vitis vinifera	NA	NA	NA	NA	NA
TR41841|c1_g2_i3	347	3.50699e-65	97	207.223	28393076	putative Na+ dependent ileal bile acid transporter	Arabidopsis thaliana	NA	NA	NA	NA	NA
TR42174|c0_g3_i1	224	1.90082e-45	98	155.992	28393722	unknown protein	Arabidopsis thaliana	NA	NA	NA	NA	NA
TR40785|c1_g4_i2	272	6.23567e-61	98	190.66	28465347	pyruvate dehydrogenase E1 alpha subunit	Nicotiana tabacum	NA	oxidation-reduction process[GO:0055114]	oxidoreductase activity, acting on the aldehyde or oxo group of donors, disulfide as acceptor[GO:0016624]	NA	NA
TR995|c0_g1_i1	238	9.45659e-20	97	86.6557	28874838	ZR4 protein	Medicago sativa	NA	NA	NA	NA	NA
TR34984|c0_g3_i3	486	1.3231e-19	65	88.1965	29650480	small blue copper protein Bcp1	Paraboea crassifolia	NA	NA	NA	NA	NA
TR35621|c1_g4_i5	1458	0	98	701.049	29839420	COMT2_OCIBARecName: Full=Caffeic acid 3-O-methyltransferase 2; Short=CAOMT-2; Short=COMT-2; AltName: Full=S-adenosysl-L-methionine:caffeic acid 3-O-methyltransferase 2	Ocimum basilicum	Lamiaceae	lignin biosynthetic process[GO:0009809] ; methylation[GO:0032259]	caffeate O-methyltransferase activity[GO:0047763] ; protein dimerization activity[GO:0046983]	NA	map00940:Phenylpropanoid biosynthesis(O-methyltransferase[ec:2.1.1.68])
TR35621|c1_g3_i1	733	5.88166e-130	99	380.948	29839420	COMT2_OCIBARecName: Full=Caffeic acid 3-O-methyltransferase 2; Short=CAOMT-2; Short=COMT-2; AltName: Full=S-adenosysl-L-methionine:caffeic acid 3-O-methyltransferase 2	Ocimum basilicum	Lamiaceae	lignin biosynthetic process[GO:0009809] ; methylation[GO:0032259]	caffeate O-methyltransferase activity[GO:0047763] ; protein dimerization activity[GO:0046983]	NA	map00940:Phenylpropanoid biosynthesis(O-methyltransferase[ec:2.1.1.68])
TR35621|c1_g4_i6	656	2.05793e-102	98	309.686	29839421	COMT1_OCIBARecName: Full=Caffeic acid 3-O-methyltransferase 1; Short=CAOMT-1; Short=COMT-1; AltName: Full=S-adenosysl-L-methionine:caffeic acid 3-O-methyltransferase 1	Ocimum basilicum	Lamiaceae	lignin biosynthetic process[GO:0009809] ; methylation[GO:0032259]	caffeate O-methyltransferase activity[GO:0047763] ; protein dimerization activity[GO:0046983]	NA	map00940:Phenylpropanoid biosynthesis(O-methyltransferase[ec:2.1.1.68])
TR35621|c1_g4_i1	341	6.90315e-78	100	242.276	29839421	COMT1_OCIBARecName: Full=Caffeic acid 3-O-methyltransferase 1; Short=CAOMT-1; Short=COMT-1; AltName: Full=S-adenosysl-L-methionine:caffeic acid 3-O-methyltransferase 1	Ocimum basilicum	Lamiaceae	lignin biosynthetic process[GO:0009809] ; methylation[GO:0032259]	caffeate O-methyltransferase activity[GO:0047763] ; protein dimerization activity[GO:0046983]	NA	map00940:Phenylpropanoid biosynthesis(O-methyltransferase[ec:2.1.1.68])
TR35621|c1_g1_i1	253	1.93082e-42	98	149.058	29839421	COMT1_OCIBARecName: Full=Caffeic acid 3-O-methyltransferase 1; Short=CAOMT-1; Short=COMT-1; AltName: Full=S-adenosysl-L-methionine:caffeic acid 3-O-methyltransferase 1	Ocimum basilicum	Lamiaceae	lignin biosynthetic process[GO:0009809] ; methylation[GO:0032259]	caffeate O-methyltransferase activity[GO:0047763] ; protein dimerization activity[GO:0046983]	NA	map00940:Phenylpropanoid biosynthesis(O-methyltransferase[ec:2.1.1.68])
TR21959|c0_g1_i1	258	7.74992e-48	95	159.073	29893610	SR-rich pre-mRNA splicing activator	Oryza sativa Japonica Group	NA	mRNA processing[GO:0006397]	NA	NA	NA
TR34242|c0_g3_i1	460	1.5235e-90	98	271.552	30013699	CDC48-like protein	Mirabilis jalapa	NA	NA	ATP binding[GO:0005524]	NA	NA
TR30819|c1_g1_i1	261	1.11487e-34	87	124.405	30684739	calcium-dependent lipid-binding domain-containing protein	Arabidopsis thaliana	NA	defense response[GO:0006952] ; response to salt stress[GO:0009651] ; positive regulation of defense response to bacterium, incompatible interaction[GO:1902479] ; abscisic acid-activated signaling pathway[GO:0009738] ; positive regulation of abscisic acid-activated signaling pathway[GO:0009789] ; positive regulation of response to salt stress[GO:1901002]	metal ion binding[GO:0046872] ; phospholipid binding[GO:0005543] ; protein binding[GO:0005515]	cytosol[GO:0005829] ; nucleus[GO:0005634] ; plasma membrane[GO:0005886]	NA
TR3074|c0_g1_i1	480	2.59371e-15	92	78.9518	30689342	inositol transporter 1	Arabidopsis thaliana	NA	myo-inositol transport[GO:0015798] ; cation transmembrane transport[GO:0098655]	sugar:proton symporter activity[GO:0005351] ; myo-inositol:proton symporter activity[GO:0005366]	plant-type vacuole membrane[GO:0009705] ; plasma membrane[GO:0005886] ; integral component of membrane[GO:0016021]	NA
TR43997|c0_g1_i1	441	6.57693e-18	100	87.0409	31580855	plasma membrane H+-ATPase	Sesbania rostrata	NA	ATP biosynthetic process[GO:0006754] ; hydrogen ion transmembrane transport[GO:1902600]	hydrogen-exporting ATPase activity, phosphorylative mechanism[GO:0008553] ; metal ion binding[GO:0046872] ; ATP binding[GO:0005524]	integral component of membrane[GO:0016021]	map00190:Oxidative phosphorylation(ATPase[ec:3.6.3.6])
TR2861|c2_g5_i2	267	1.15145e-37	100	131.339	32400871	AF479048_1ribosomal Pr 117, partial	Triticum aestivum	NA	translation[GO:0006412]	structural constituent of ribosome[GO:0003735]	ribosome[GO:0005840]	NA
TR32262|c0_g2_i6	254	1.25314e-51	100	164.851	32400873	AF479049_1ribosomal protein L2, partial	Triticum aestivum	NA	translation[GO:0006412]	structural constituent of ribosome[GO:0003735]	ribosome[GO:0005840]	NA
TR3979|c0_g2_i1	331	4.35222e-27	100	103.219	32400873	AF479049_1ribosomal protein L2, partial	Triticum aestivum	NA	translation[GO:0006412]	structural constituent of ribosome[GO:0003735]	ribosome[GO:0005840]	NA
TR18322|c0_g1_i1	226	4.97882e-35	90	125.946	32478003	euFUL FRUITFULL-like MADS-box	Antirrhinum majus	NA	regulation of transcription, DNA-templated[GO:0006355] ; transcription, DNA-templated[GO:0006351]	transcription factor activity, sequence-specific DNA binding[GO:0003700] ; DNA binding[GO:0003677] ; protein dimerization activity[GO:0046983]	nucleus[GO:0005634]	NA
TR10135|c0_g1_i1	252	2.77227e-12	91	65.4698	33187353	phantastica transcription factor	Vitex negundo var. cannabifolia	NA	NA	DNA binding[GO:0003677]	NA	NA
TR43477|c0_g6_i4	435	4.28102e-64	93	214.927	33330870	type-B response regulator	Catharanthus roseus	NA	phosphorelay signal transduction system[GO:0000160] ; regulation of transcription, DNA-templated[GO:0006355] ; transcription, DNA-templated[GO:0006351]	DNA binding[GO:0003677] ; transcription factor activity, sequence-specific DNA binding[GO:0003700]	nucleus[GO:0005634]	NA
TR43404|c0_g2_i1	277	2.43277e-60	98	190.66	33347403	phenylalanine ammonia-lyase	Pyrus pyrifolia	NA	metabolic process[GO:0008152]	lyase activity[GO:0016829]	NA	NA
TR7830|c1_g7_i1	258	2.17319e-57	100	181.8	33563040	actin	Fragaria x ananassa	NA	NA	NA	NA	NA
TR2666|c1_g2_i6	539	1.87145e-45	76	158.303	33771374	zinc finger protein PIF1	Nicotiana benthamiana	NA	NA	NA	NA	NA
TR31831|c1_g3_i1	262	3.02443e-06	61	47.7506	33772151	chlorophyll a/b-binding protein type I	Malus domestica	NA	NA	NA	NA	NA
TR19008|c0_g1_i1	248	1.10116e-47	96	158.688	33943519	gigantea	Brassica rapa subsp. oleifera	NA	regulation of photoperiodism, flowering[GO:2000028]	NA	NA	NA
TR34031|c2_g1_i5	545	2.32565e-62	98	197.593	34398271	protein phosphatase 2A catalytic subunit	Nicotiana benthamiana	NA	metabolic process[GO:0008152]	hydrolase activity[GO:0016787]	NA	NA
TR26870|c0_g1_i3	789	3.43116e-108	97	329.331	34481803	cullin 1C	Nicotiana tabacum	NA	ubiquitin-dependent protein catabolic process[GO:0006511]	ubiquitin protein ligase binding[GO:0031625]	cullin-RING ubiquitin ligase complex[GO:0031461]	NA
TR26870|c0_g1_i1	811	4.62752e-108	97	329.331	34481803	cullin 1C	Nicotiana tabacum	NA	ubiquitin-dependent protein catabolic process[GO:0006511]	ubiquitin protein ligase binding[GO:0031625]	cullin-RING ubiquitin ligase complex[GO:0031461]	NA
TR43378|c3_g1_i6	428	7.56543e-76	97	241.121	34481803	cullin 1C	Nicotiana tabacum	NA	ubiquitin-dependent protein catabolic process[GO:0006511]	ubiquitin protein ligase binding[GO:0031625]	cullin-RING ubiquitin ligase complex[GO:0031461]	NA
TR43378|c3_g3_i1	277	8.32178e-27	100	107.842	34481803	cullin 1C	Nicotiana tabacum	NA	ubiquitin-dependent protein catabolic process[GO:0006511]	ubiquitin protein ligase binding[GO:0031625]	cullin-RING ubiquitin ligase complex[GO:0031461]	NA
TR43378|c3_g1_i3	443	5.76118e-26	100	107.842	34481803	cullin 1C	Nicotiana tabacum	NA	ubiquitin-dependent protein catabolic process[GO:0006511]	ubiquitin protein ligase binding[GO:0031625]	cullin-RING ubiquitin ligase complex[GO:0031461]	NA
TR39822|c0_g3_i6	521	2.20452e-116	98	343.199	34809445	Pto-like serine/threonine kinase	Capsicum chinense	NA	protein phosphorylation[GO:0006468]	ATP binding[GO:0005524] ; protein serine/threonine kinase activity[GO:0004674]	NA	NA
TR31018|c0_g1_i10	290	3.24619e-64	98	199.519	37051115	S-adenosylmethionine synthetase-1	Pisum sativum	NA	S-adenosylmethionine biosynthetic process[GO:0006556]	methionine adenosyltransferase activity[GO:0004478] ; ATP binding[GO:0005524]	NA	map00270:Cysteine and methionine metabolism(adenosyltransferase[ec:2.5.1.6])
TR37231|c1_g2_i2	286	9.12293e-56	95	179.489	37222955	putative fructose-bisphosphate aldolase protein	Solanum tuberosum	NA	glycolytic process[GO:0006096]	fructose-bisphosphate aldolase activity[GO:0004332]	NA	map00030:Pentose phosphate pathway(aldolase[ec:4.1.2.13]) ; map01130:Biosynthesis of antibiotics(aldolase[ec:4.1.2.13]) ; map00051:Fructose and mannose metabolism(aldolase[ec:4.1.2.13]) ; map00710:Carbon fixation in photosynthetic organisms(aldolase[ec:4.1.2.13]) ; map00010:Glycolysis / Gluconeogenesis(aldolase[ec:4.1.2.13]) ; map00680:Methane metabolism(aldolase[ec:4.1.2.13])
TR14684|c0_g1_i1	253	4.84093e-47	96	160.999	37359248	putative heterogeneous nuclear ribonucleoprotein	Vitis vinifera	NA	NA	nucleic acid binding[GO:0003676] ; nucleotide binding[GO:0000166]	viral nucleocapsid[GO:0019013] ; intracellular ribonucleoprotein complex[GO:0030529]	NA
TR27711|c0_g2_i10	794	1.66233e-39	55	149.828	37783285	mutant cincinnata	Antirrhinum majus	NA	NA	NA	NA	NA
TR39633|c3_g8_i1	443	1.06087e-37	90	134.035	37927400	putative glycolate oxidase, partial	Vitis vinifera	NA	oxidation-reduction process[GO:0055114]	oxidoreductase activity[GO:0016491] ; FMN binding[GO:0010181]	NA	NA
TR40536|c0_g2_i4	1693	0	89	910.212	37930560	4-coumarate:coenzyme A ligase 1	Salvia miltiorrhiza	NA	metabolic process[GO:0008152]	ligase activity[GO:0016874]	integral component of membrane[GO:0016021]	NA
TR40536|c0_g2_i2	903	1.01113e-168	89	488.419	37930560	4-coumarate:coenzyme A ligase 1	Salvia miltiorrhiza	NA	metabolic process[GO:0008152]	ligase activity[GO:0016874]	integral component of membrane[GO:0016021]	NA
TR40536|c0_g2_i1	446	7.07811e-76	91	243.817	37930560	4-coumarate:coenzyme A ligase 1	Salvia miltiorrhiza	NA	metabolic process[GO:0008152]	ligase activity[GO:0016874]	integral component of membrane[GO:0016021]	NA
TR40536|c0_g3_i2	354	8.72696e-63	91	207.994	37930560	4-coumarate:coenzyme A ligase 1	Salvia miltiorrhiza	NA	metabolic process[GO:0008152]	ligase activity[GO:0016874]	integral component of membrane[GO:0016021]	NA
TR40536|c0_g6_i1	266	9.01677e-42	92	150.214	37930560	4-coumarate:coenzyme A ligase 1	Salvia miltiorrhiza	NA	metabolic process[GO:0008152]	ligase activity[GO:0016874]	integral component of membrane[GO:0016021]	NA
TR40536|c0_g2_i5	227	1.38453e-35	92	132.109	37930560	4-coumarate:coenzyme A ligase 1	Salvia miltiorrhiza	NA	metabolic process[GO:0008152]	ligase activity[GO:0016874]	integral component of membrane[GO:0016021]	NA
TR41683|c2_g2_i4	493	8.05501e-105	95	319.316	37930570	4-coumarate:coenzyme A ligase 2	Salvia miltiorrhiza	NA	metabolic process[GO:0008152]	ligase activity[GO:0016874]	NA	NA
TR41683|c2_g2_i1	294	1.499e-31	94	122.094	37930570	4-coumarate:coenzyme A ligase 2	Salvia miltiorrhiza	NA	metabolic process[GO:0008152]	ligase activity[GO:0016874]	NA	NA
TR3149|c0_g1_i1	1388	8.76374e-170	86	491.5	38047401	O-methyltransferase	Mentha x piperita	NA	methylation[GO:0032259]	O-methyltransferase activity[GO:0008171] ; protein dimerization activity[GO:0046983]	NA	NA
TR36925|c0_g4_i3	1162	1.12387e-165	81	478.019	38047401	O-methyltransferase	Mentha x piperita	NA	methylation[GO:0032259]	O-methyltransferase activity[GO:0008171] ; protein dimerization activity[GO:0046983]	NA	NA
TR3149|c0_g1_i2	570	1.10974e-82	84	258.07	38047401	O-methyltransferase	Mentha x piperita	NA	methylation[GO:0032259]	O-methyltransferase activity[GO:0008171] ; protein dimerization activity[GO:0046983]	NA	NA
TR29306|c1_g2_i4	601	1.22894e-77	78	245.358	38047401	O-methyltransferase	Mentha x piperita	NA	NA	methyltransferase activity[GO:0008168]	NA	NA
TR29306|c1_g1_i1	441	1.37811e-50	73	173.326	38047401	O-methyltransferase	Mentha x piperita	NA	NA	methyltransferase activity[GO:0008168]	NA	NA
TR29306|c1_g2_i7	440	6.09406e-50	79	171.785	38047401	O-methyltransferase	Mentha x piperita	NA	methylation[GO:0032259]	O-methyltransferase activity[GO:0008171] ; protein dimerization activity[GO:0046983]	NA	NA
TR29306|c1_g2_i3	552	5.01932e-49	73	170.629	38047401	O-methyltransferase	Mentha x piperita	NA	NA	methyltransferase activity[GO:0008168]	NA	NA
TR36925|c0_g5_i1	294	1.28798e-36	76	134.42	38047401	O-methyltransferase	Mentha x piperita	NA	NA	methyltransferase activity[GO:0008168]	NA	NA
TR43641|c1_g1_i2	1348	2.67186e-126	76	405.216	38194910	gag-pol polyprotein	Phaseolus vulgaris	NA	NA	binding[GO:0005488]	NA	NA
TR43641|c2_g5_i5	1254	3.2421e-113	66	347.821	38194910	gag-pol polyprotein	Phaseolus vulgaris	NA	NA	NA	NA	NA
TR43641|c1_g1_i3	943	7.42624e-79	79	268.47	38194910	gag-pol polyprotein	Phaseolus vulgaris	NA	DNA integration[GO:0015074]	nucleic acid binding[GO:0003676] ; zinc ion binding[GO:0008270]	NA	NA
TR44818|c3_g1_i2	782	2.06876e-105	96	317.39	38454166	At2g22125	Arabidopsis thaliana	NA	NA	NA	NA	NA
TR20169|c0_g1_i1	404	6.67531e-88	97	267.314	38454166	At2g22125	Arabidopsis thaliana	NA	NA	NA	NA	NA
TR44818|c3_g2_i1	240	1.12178e-44	97	153.68	38454166	At2g22125	Arabidopsis thaliana	NA	NA	NA	NA	NA
TR3910|c0_g1_i1	1149	0	99	605.134	38564733	initiation factor eIF4A-15	Helianthus annuus	NA	translational initiation[GO:0006413]	helicase activity[GO:0004386] ; ATP binding[GO:0005524] ; translation initiation factor activity[GO:0003743]	NA	NA
TR36393|c1_g1_i5	1532	1.45849e-148	78	431.795	38679123	putative acyltransferase	Salvia splendens	Lamiaceae	NA	transferase activity, transferring acyl groups[GO:0016746]	NA	NA
TR2375|c0_g1_i4	1064	5.07482e-105	72	325.094	38679123	putative acyltransferase	Salvia splendens	Lamiaceae	NA	transferase activity, transferring acyl groups[GO:0016746]	NA	NA
TR6907|c0_g1_i1	566	4.45753e-06	52	50.8322	40253253	hypothetical protein	Oryza sativa Japonica Group	NA	NA	NA	NA	NA
TR33627|c1_g5_i1	315	1.46403e-52	100	170.244	40287492	putative ribosomal protein	Capsicum annuum	NA	translation[GO:0006412]	structural constituent of ribosome[GO:0003735] ; RNA binding[GO:0003723]	ribosome[GO:0005840]	NA
TR23681|c0_g1_i1	612	5.2853e-73	90	228.794	40287564	RNA helicase PRH75	Capsicum annuum	NA	metabolic process[GO:0008152]	helicase activity[GO:0004386] ; RNA binding[GO:0003723] ; ATP binding[GO:0005524]	nucleus[GO:0005634]	NA
TR39929|c0_g3_i1	369	7.19002e-23	100	99.3673	40317610	3-hydroxy-3-methylglutaryl-coenzyme A reductase	Andrographis paniculata	NA	coenzyme A metabolic process[GO:0015936] ; oxidation-reduction process[GO:0055114] ; isoprenoid biosynthetic process[GO:0008299]	hydroxymethylglutaryl-CoA reductase (NADPH) activity[GO:0004420] ; NADP binding[GO:0050661]	integral component of membrane[GO:0016021] ; endoplasmic reticulum membrane[GO:0005789]	map01130:Biosynthesis of antibiotics(reductase (NADPH)[ec:1.1.1.34]) ; map00900:Terpenoid backbone biosynthesis(reductase (NADPH)[ec:1.1.1.34])
TR42999|c0_g7_i3	855	2.35839e-124	92	365.54	40645474	PERK1-like protein kinase	Nicotiana tabacum	NA	protein phosphorylation[GO:0006468]	protein kinase activity[GO:0004672] ; ATP binding[GO:0005524]	NA	NA
TR42999|c0_g7_i4	428	1.36187e-77	95	239.965	40645474	PERK1-like protein kinase	Nicotiana tabacum	NA	protein phosphorylation[GO:0006468]	protein kinase activity[GO:0004672] ; ATP binding[GO:0005524]	NA	NA
TR27601|c0_g1_i1	483	7.03549e-72	96	226.483	40645474	PERK1-like protein kinase	Nicotiana tabacum	NA	protein phosphorylation[GO:0006468]	protein kinase activity[GO:0004672] ; ATP binding[GO:0005524]	NA	NA
TR42999|c0_g7_i6	269	5.96239e-39	93	138.272	40645474	PERK1-like protein kinase	Nicotiana tabacum	NA	protein phosphorylation[GO:0006468]	protein kinase activity[GO:0004672] ; ATP binding[GO:0005524]	NA	NA
TR42999|c0_g7_i1	257	4.91431e-26	88	103.99	40645474	PERK1-like protein kinase	Nicotiana tabacum	NA	protein phosphorylation[GO:0006468]	protein kinase activity[GO:0004672] ; ATP binding[GO:0005524]	NA	NA
TR2263|c1_g1_i6	293	6.43229e-55	93	175.637	40645476	protein phosphatase 2C	Nicotiana tabacum	NA	protein dephosphorylation[GO:0006470]	protein serine/threonine phosphatase activity[GO:0004722]	NA	NA
TR2263|c1_g1_i9	298	1.10142e-48	92	159.844	40645476	protein phosphatase 2C	Nicotiana tabacum	NA	protein dephosphorylation[GO:0006470]	protein serine/threonine phosphatase activity[GO:0004722]	NA	NA
TR42870|c2_g14_i1	325	5.89388e-45	90	150.984	40645476	protein phosphatase 2C	Nicotiana tabacum	NA	protein dephosphorylation[GO:0006470]	protein serine/threonine phosphatase activity[GO:0004722]	NA	NA
TR28670|c1_g2_i1	276	2.20106e-55	94	179.489	41033739	endo-1,4-beta-D-glucanase KORRIGAN	Pisum sativum	NA	cellulose catabolic process[GO:0030245]	cellulase activity[GO:0008810]	NA	map00500:Starch and sucrose metabolism(endo-1,4-beta-D-glucanase[ec:3.2.1.4])
TR31834|c1_g1_i1	564	5.61419e-54	88	179.489	41745624	YABBY-like transcription factor GRAMINIFOLIA	Antirrhinum majus	NA	multicellular organismal development[GO:0007275]	NA	NA	NA
TR42279|c0_g6_i1	227	4.41819e-39	89	141.739	42562518	alpha/beta-hydrolase domain-containing protein	Arabidopsis thaliana	NA	NA	catalytic activity[GO:0003824]	integral component of membrane[GO:0016021]	NA
TR24719|c1_g1_i1	317	9.64708e-52	94	172.17	42565505	cullin	Hyacinthus orientalis	NA	ubiquitin-dependent protein catabolic process[GO:0006511]	ubiquitin protein ligase binding[GO:0031625]	NA	NA
TR39761|c1_g1_i1	314	4.14512e-28	92	112.464	42567960	putative amino acid transporter	Arabidopsis thaliana	NA	amino acid transport[GO:0006865]	amine transmembrane transporter activity[GO:0005275]	plasma membrane[GO:0005886] ; integral component of membrane[GO:0016021] ; chloroplast inner membrane[GO:0009706]	NA
TR44075|c1_g2_i4	306	1.13967e-55	88	186.808	42570324	probable glucuronoxylan glucuronosyltransferase IRX7	Arabidopsis thaliana	NA	plant-type secondary cell wall biogenesis[GO:0009834] ; glucuronoxylan biosynthetic process[GO:0010417]	glucuronosyltransferase activity[GO:0015020]	Golgi apparatus[GO:0005794] ; plasma membrane[GO:0005886]	map00860:Porphyrin and chlorophyll metabolism(1-naphthol glucuronyltransferase[ec:2.4.1.17]) ; map00500:Starch and sucrose metabolism(1-naphthol glucuronyltransferase[ec:2.4.1.17]) ; map00983:Drug metabolism - other enzymes(1-naphthol glucuronyltransferase[ec:2.4.1.17]) ; map00982:Drug metabolism - cytochrome P450(1-naphthol glucuronyltransferase[ec:2.4.1.17]) ; map00980:Metabolism of xenobiotics…
TR33190|c0_g7_i2	398	4.77555e-83	95	251.521	42572785	plasma membrane intrinsic protein 1;4	Arabidopsis thaliana	NA	response to water deprivation[GO:0009414] ; water transport[GO:0006833]	water channel activity[GO:0015250]	plasma membrane[GO:0005886] ; integral component of membrane[GO:0016021]	NA
TR38152|c0_g1_i2	1521	1.32571e-42	91	160.999	42733524	BRI1-KD interacting protein 132	Oryza sativa Japonica Group	NA	NA	NA	NA	NA
TR36981|c1_g1_i1	594	7.45527e-113	91	331.257	42795293	deficiens	Salvia coccinea	Lamiaceae	regulation of transcription, DNA-templated[GO:0006355] ; transcription, DNA-templated[GO:0006351]	transcription factor activity, sequence-specific DNA binding[GO:0003700] ; DNA binding[GO:0003677] ; protein dimerization activity[GO:0046983]	nucleus[GO:0005634]	NA
TR34739|c0_g3_i1	401	1.95649e-31	100	119.398	45454222	putative casein kinase II catalytic alpha subunit	Arabidopsis thaliana	NA	NA	NA	NA	NA
TR33722|c1_g1_i1	233	1.66865e-47	100	159.073	45476403	14-3-3 f-2 protein	Nicotiana tabacum	NA	NA	protein domain specific binding[GO:0019904]	NA	NA
TR20405|c0_g2_i1	270	4.18522e-10	47	59.3066	45680447	putative histone H2A	Oryza sativa Japonica Group	NA	NA	NA	NA	NA
TR40863|c0_g1_i10	1501	0	71	539.65	45789980	quercetin 3-O-glucoside-6''-O-malonyltransferase	Glandularia x hybrida	NA	NA	NA	NA	NA
TR40863|c0_g1_i1	1028	1.19716e-113	74	347.051	45789980	quercetin 3-O-glucoside-6''-O-malonyltransferase	Glandularia x hybrida	NA	NA	transferase activity[GO:0016740]	NA	NA
TR40863|c0_g1_i16	691	3.11467e-77	69	248.825	45789980	quercetin 3-O-glucoside-6''-O-malonyltransferase	Glandularia x hybrida	NA	NA	NA	NA	NA
TR40863|c0_g1_i9	368	5.76689e-34	71	129.413	45789980	quercetin 3-O-glucoside-6''-O-malonyltransferase	Glandularia x hybrida	NA	NA	NA	NA	NA
TR40863|c0_g1_i6	248	1.56362e-26	71	106.686	45789980	quercetin 3-O-glucoside-6''-O-malonyltransferase	Glandularia x hybrida	NA	NA	NA	NA	NA
TR40863|c0_g1_i8	473	3.01074e-59	77	198.749	45790023	quercetin 3-O-glucoside-6''-O-malonyltransferase	Lamium purpureum	Lamiaceae	NA	transferase activity[GO:0016740]	NA	NA
TR40863|c0_g1_i14	281	3.11884e-29	78	114.775	45790023	quercetin 3-O-glucoside-6''-O-malonyltransferase	Lamium purpureum	Lamiaceae	NA	transferase activity[GO:0016740]	NA	NA
TR40483|c0_g1_i1	234	2.27974e-51	100	174.096	45935145	prephenate dehydratase	Ipomoea trifida	NA	L-phenylalanine biosynthetic process[GO:0009094]	arogenate dehydratase activity[GO:0047769] ; amino acid binding[GO:0016597] ; prephenate dehydratase activity[GO:0004664]	chloroplast stroma[GO:0009570]	map01130:Biosynthesis of antibiotics(dehydratase[ec:4.2.1.91]) ; map01130:Biosynthesis of antibiotics(dehydratase[ec:4.2.1.51]) ; map00400:Phenylalanine, tyrosine and tryptophan biosynthesis(dehydratase[ec:4.2.1.91]) ; map00400:Phenylalanine, tyrosine and tryptophan biosynthesis(dehydratase[ec:4.2.1.51])
TR42024|c1_g2_i1	308	1.70416e-41	89	145.976	45935152	putative protein kinase	Ipomoea trifida	NA	protein phosphorylation[GO:0006468]	protein kinase activity[GO:0004672] ; ATP binding[GO:0005524]	NA	NA
TR20884|c0_g1_i3	239	9.83557e-45	97	151.754	46095312	protein serine/threonine phosphatase, partial	Nicotiana benthamiana	NA	protein dephosphorylation[GO:0006470]	phosphoprotein phosphatase activity[GO:0004721]	cytoplasm[GO:0005737] ; nucleus[GO:0005634]	map04660:T cell receptor signaling pathway(phosphatase[ec:3.1.3.16])
TR17819|c0_g1_i1	260	2.81372e-47	97	169.474	46389837	putative guanine nucleotide-exchange protein GEP2	Oryza sativa Japonica Group	NA	positive regulation of GTPase activity[GO:0043547] ; regulation of ARF protein signal transduction[GO:0032012] ; vesicle-mediated transport[GO:0016192]	ARF guanyl-nucleotide exchange factor activity[GO:0005086]	trans-Golgi network[GO:0005802] ; plastid[GO:0009536]	NA
TR39459|c0_g1_i7	487	4.40461e-67	89	221.861	46812259	4-coumarate-CoA ligase	Agastache rugosa	Lamiaceae	metabolic process[GO:0008152]	ligase activity[GO:0016874]	NA	NA
TR27906|c0_g7_i1	254	7.62857e-17	100	75.485	47026945	ribosomal protein S29	Hyacinthus orientalis	NA	translation[GO:0006412]	structural constituent of ribosome[GO:0003735]	ribosome[GO:0005840]	NA
TR27906|c0_g3_i1	283	1.06415e-16	100	75.485	47026945	ribosomal protein S29	Hyacinthus orientalis	NA	translation[GO:0006412]	structural constituent of ribosome[GO:0003735]	ribosome[GO:0005840]	NA
TR27906|c0_g10_i1	341	1.91665e-16	100	75.485	47026945	ribosomal protein S29	Hyacinthus orientalis	NA	translation[GO:0006412]	structural constituent of ribosome[GO:0003735]	ribosome[GO:0005840]	NA
TR36467|c2_g5_i1	295	3.99635e-59	97	202.601	47078500	cellulose synthase	Populus tremula x Populus tremuloides	NA	cell wall organization[GO:0071555] ; cellulose biosynthetic process[GO:0030244]	cellulose synthase (UDP-forming) activity[GO:0016760] ; zinc ion binding[GO:0008270]	plasma membrane[GO:0005886] ; integral component of membrane[GO:0016021]	map00500:Starch and sucrose metabolism(synthase (UDP-forming)[ec:2.4.1.12])
TR37723|c0_g4_i4	296	3.00643e-58	97	186.808	47496756	beta-cyanoalanine synthase	Diospyros kaki	NA	cysteine biosynthetic process[GO:0019344] ; cyanide metabolic process[GO:0019499]	cysteine synthase activity[GO:0004124] ; L-3-cyanoalanine synthase activity[GO:0050017]	mitochondrion[GO:0005739]	map00920:Sulfur metabolism(synthase[ec:2.5.1.47]) ; map01130:Biosynthesis of antibiotics(synthase[ec:2.5.1.47]) ; map00460:Cyanoamino acid metabolism(synthase[ec:4.4.1.9]) ; map00270:Cysteine and methionine metabolism(synthase[ec:2.5.1.47])
TR37723|c0_g4_i2	455	1.74124e-56	97	184.496	47496756	beta-cyanoalanine synthase	Diospyros kaki	NA	cysteine biosynthetic process[GO:0019344] ; cyanide metabolic process[GO:0019499]	cysteine synthase activity[GO:0004124] ; L-3-cyanoalanine synthase activity[GO:0050017]	mitochondrion[GO:0005739]	map00920:Sulfur metabolism(synthase[ec:2.5.1.47]) ; map01130:Biosynthesis of antibiotics(synthase[ec:2.5.1.47]) ; map00460:Cyanoamino acid metabolism(synthase[ec:4.4.1.9]) ; map00270:Cysteine and methionine metabolism(synthase[ec:2.5.1.47])
TR36274|c1_g1_i9	1564	8.46214e-155	67	484.952	47824985	Putative gag-pol polyprotein, identical	Solanum demissum	NA	NA	NA	NA	NA
TR44651|c0_g1_i2	614	2.95242e-123	91	358.221	47834533	ferredoxin-dependent glutamate synthase, partial	Medicago sativa	NA	oxidation-reduction process[GO:0055114]	oxidoreductase activity[GO:0016491]	NA	NA
TR36845|c5_g4_i1	230	8.70409e-44	98	147.132	48057626	Homeobox-leucine zipper protein HAT7 , putative	Solanum demissum	NA	regulation of transcription, DNA-templated[GO:0006355] ; transcription, DNA-templated[GO:0006351]	sequence-specific DNA binding[GO:0043565] ; transcription factor activity, sequence-specific DNA binding[GO:0003700]	nucleus[GO:0005634]	NA
TR39761|c1_g5_i1	233	9.42991e-23	94	94.3597	48209907	Tryptophan/tyrosine permease family protein	Solanum demissum	NA	amino acid transmembrane transport[GO:0003333]	NA	integral component of membrane[GO:0016021]	NA
TR20082|c0_g1_i1	235	1.00263e-45	98	155.221	48526082	5-enol-pyruvylshikimate-phosphate synthase, partial	Plantago lanceolata	NA	chorismate biosynthetic process[GO:0009423] ; aromatic amino acid family biosynthetic process[GO:0009073]	3-phosphoshikimate 1-carboxyvinyltransferase activity[GO:0003866]	NA	map01130:Biosynthesis of antibiotics(1-carboxyvinyltransferase[ec:2.5.1.19]) ; map00400:Phenylalanine, tyrosine and tryptophan biosynthesis(1-carboxyvinyltransferase[ec:2.5.1.19])
TR40750|c0_g1_i1	296	2.19804e-63	100	199.519	49175787	26S proteasome ATPase subunit	Pisum sativum	NA	NA	ATP binding[GO:0005524]	proteasome complex[GO:0000502]	NA
TR28407|c0_g2_i1	248	1.17678e-48	96	171.785	49523567	STYLOSA protein	Antirrhinum majus	NA	NA	NA	NA	NA
TR43736|c3_g7_i1	229	7.71025e-32	97	124.02	49523567	STYLOSA protein	Antirrhinum majus	NA	NA	NA	NA	NA
TR42543|c1_g1_i2	979	7.41731e-75	61	255.373	49523817	SEU3A protein	Antirrhinum majus	NA	NA	NA	NA	NA
TR42543|c1_g1_i1	503	2.04813e-24	57	106.686	49523817	SEU3A protein	Antirrhinum majus	NA	NA	NA	NA	NA
TR42543|c1_g1_i5	777	4.20488e-18	65	90.5077	49523817	SEU3A protein	Antirrhinum majus	NA	NA	NA	NA	NA
TR32662|c0_g3_i4	776	6.29272e-29	78	120.168	49523819	SEU3B protein	Antirrhinum majus	NA	NA	NA	NA	NA
TR32662|c0_g3_i6	1065	2.84475e-28	78	120.553	49523819	SEU3B protein	Antirrhinum majus	NA	NA	NA	NA	NA
TR32662|c0_g3_i3	1027	3.2827e-28	78	120.168	49523819	SEU3B protein	Antirrhinum majus	NA	NA	NA	NA	NA
TR42543|c1_g1_i6	582	7.39806e-48	59	166.392	49523821	SEU3B protein	Antirrhinum majus	NA	NA	NA	NA	NA
TR40329|c1_g3_i2	390	4.32175e-22	74	95.1301	49523821	SEU3B protein	Antirrhinum majus	NA	NA	NA	NA	NA
TR42543|c1_g1_i3	322	1.52459e-18	57	84.3445	49523821	SEU3B protein	Antirrhinum majus	NA	NA	NA	NA	NA
TR32444|c0_g3_i3	493	1.65177e-71	99	221.09	49615353	superoxide dismutase	Malus baccata var. xiaojinensis	NA	removal of superoxide radicals[GO:0019430] ; oxidation-reduction process[GO:0055114]	metal ion binding[GO:0046872] ; superoxide dismutase activity[GO:0004784]	NA	NA
TR32444|c0_g3_i2	296	1.51714e-59	97	187.963	49615353	superoxide dismutase	Malus baccata var. xiaojinensis	NA	removal of superoxide radicals[GO:0019430] ; oxidation-reduction process[GO:0055114]	metal ion binding[GO:0046872] ; superoxide dismutase activity[GO:0004784]	NA	NA
TR18057|c1_g1_i1	293	5.82499e-20	100	83.5741	50508112	40S ribosomal protein S15	Oryza sativa Japonica Group	NA	translation[GO:0006412]	structural constituent of ribosome[GO:0003735] ; RNA binding[GO:0003723]	cytosolic small ribosomal subunit[GO:0022627]	NA
TR2727|c0_g1_i5	499	4.27695e-85	96	263.462	50513524	AChain A, Crystal Structure Of Kinesin-Like Calmodulin Binding Protein	Solanum tuberosum	NA	microtubule-based movement[GO:0007018] ; oxidation-reduction process[GO:0055114]	microtubule binding[GO:0008017] ; oxidoreductase activity[GO:0016491] ; ATP binding[GO:0005524] ; microtubule motor activity[GO:0003777]	kinesin complex[GO:0005871]	NA
TR16201|c0_g1_i4	284	8.35021e-28	98	104.375	50660434	polyubiquitin	Lemna minor	NA	NA	NA	NA	NA
TR31236|c7_g3_i1	301	5.41378e-10	73	58.151	50660434	polyubiquitin	Lemna minor	NA	NA	NA	NA	NA
TR34622|c0_g1_i1	1857	1.52845e-58	51	221.09	50872431	putative polyprotein	Oryza sativa Japonica Group	NA	NA	NA	NA	NA
TR41636|c0_g9_i1	437	5.21192e-46	96	163.31	51458314	somatic embryogenesis receptor-like kinase	Theobroma cacao	NA	protein phosphorylation[GO:0006468]	transmembrane receptor protein kinase activity[GO:0019199] ; ATP binding[GO:0005524] ; protein serine/threonine kinase activity[GO:0004674]	integral component of membrane[GO:0016021]	NA
TR21490|c1_g1_i1	357	3.96174e-71	97	219.55	51493595	ubiquitin-activating enzyme	Vitis vinifera	NA	metabolic process[GO:0008152]	small protein activating enzyme activity[GO:0008641]	NA	NA
TR43821|c2_g8_i2	291	2.96947e-57	96	183.341	51493595	ubiquitin-activating enzyme	Vitis vinifera	NA	metabolic process[GO:0008152]	small protein activating enzyme activity[GO:0008641]	NA	NA
TR34800|c0_g1_i2	1150	1.10644e-108	67	331.643	51507325	beta-1,3-glucanase	Olea europaea	NA	NA	hydrolase activity[GO:0016787]	NA	NA
TR34800|c0_g1_i13	1272	3.6832e-107	68	329.331	51507325	beta-1,3-glucanase	Olea europaea	NA	NA	hydrolase activity[GO:0016787]	NA	NA
TR34800|c0_g1_i1	1104	1.00042e-89	62	282.722	51507325	beta-1,3-glucanase	Olea europaea	NA	NA	NA	NA	NA
TR34800|c0_g1_i5	547	1.5104e-44	72	158.303	51507325	beta-1,3-glucanase	Olea europaea	NA	metabolic process[GO:0008152]	hydrolase activity, acting on glycosyl bonds[GO:0016798]	NA	NA
TR32280|c0_g2_i2	449	2.51344e-22	86	95.9005	51512229	dehydration protein	Salvia miltiorrhiza	NA	response to stress[GO:0006950] ; response to water[GO:0009415]	NA	NA	NA
TR38063|c2_g6_i2	553	4.91816e-20	100	92.0485	51587350	putative MAP kinase	Papaver rhoeas	NA	MAPK cascade[GO:0000165]	MAP kinase activity[GO:0004707] ; ATP binding[GO:0005524]	intracellular[GO:0005622]	map04150:mTOR signaling pathway(protein kinase[ec:2.7.11.24])
TR39143|c1_g6_i5	224	4.77719e-46	100	150.984	52001189	alpha-tubulin, partial	Camellia sinensis	NA	microtubule-based process[GO:0007017]	structural constituent of cytoskeleton[GO:0005200] ; GTP binding[GO:0005525]	microtubule[GO:0005874]	NA
TR36637|c0_g1_i2	1208	0	92	656.751	52699549	glycosyl hydrolase family-like protein	Salvia miltiorrhiza	NA	carbohydrate metabolic process[GO:0005975]	raffinose alpha-galactosidase activity[GO:0052692]	integral component of membrane[GO:0016021]	map00603:Glycosphingolipid biosynthesis - globo series(melibiase[ec:3.2.1.22]) ; map00600:Sphingolipid metabolism(melibiase[ec:3.2.1.22]) ; map00561:Glycerolipid metabolism(melibiase[ec:3.2.1.22]) ; map00052:Galactose metabolism(melibiase[ec:3.2.1.22])
TR36637|c0_g1_i3	776	6.23388e-131	92	386.726	52699549	glycosyl hydrolase family-like protein	Salvia miltiorrhiza	NA	carbohydrate metabolic process[GO:0005975]	raffinose alpha-galactosidase activity[GO:0052692]	integral component of membrane[GO:0016021]	map00603:Glycosphingolipid biosynthesis - globo series(melibiase[ec:3.2.1.22]) ; map00600:Sphingolipid metabolism(melibiase[ec:3.2.1.22]) ; map00561:Glycerolipid metabolism(melibiase[ec:3.2.1.22]) ; map00052:Galactose metabolism(melibiase[ec:3.2.1.22])
TR36637|c0_g2_i5	568	2.96135e-52	90	181.03	52699549	glycosyl hydrolase family-like protein	Salvia miltiorrhiza	NA	carbohydrate metabolic process[GO:0005975]	raffinose alpha-galactosidase activity[GO:0052692]	integral component of membrane[GO:0016021]	map00603:Glycosphingolipid biosynthesis - globo series(melibiase[ec:3.2.1.22]) ; map00600:Sphingolipid metabolism(melibiase[ec:3.2.1.22]) ; map00561:Glycerolipid metabolism(melibiase[ec:3.2.1.22]) ; map00052:Galactose metabolism(melibiase[ec:3.2.1.22])
TR36637|c0_g2_i3	549	3.92724e-51	89	177.948	52699549	glycosyl hydrolase family-like protein	Salvia miltiorrhiza	NA	carbohydrate metabolic process[GO:0005975]	raffinose alpha-galactosidase activity[GO:0052692]	integral component of membrane[GO:0016021]	map00603:Glycosphingolipid biosynthesis - globo series(melibiase[ec:3.2.1.22]) ; map00600:Sphingolipid metabolism(melibiase[ec:3.2.1.22]) ; map00561:Glycerolipid metabolism(melibiase[ec:3.2.1.22]) ; map00052:Galactose metabolism(melibiase[ec:3.2.1.22])
TR2566|c0_g1_i2	764	1.92599e-111	98	330.872	52790405	HMGR	Salvia miltiorrhiza	NA	coenzyme A metabolic process[GO:0015936] ; oxidation-reduction process[GO:0055114]	coenzyme binding[GO:0050662] ; hydroxymethylglutaryl-CoA reductase (NADPH) activity[GO:0004420]	NA	map01130:Biosynthesis of antibiotics(reductase (NADPH)[ec:1.1.1.34]) ; map00900:Terpenoid backbone biosynthesis(reductase (NADPH)[ec:1.1.1.34])
TR40055|c1_g2_i1	749	4.97743e-84	98	260.766	52790405	HMGR	Salvia miltiorrhiza	NA	coenzyme A metabolic process[GO:0015936] ; oxidation-reduction process[GO:0055114]	coenzyme binding[GO:0050662] ; hydroxymethylglutaryl-CoA reductase (NADPH) activity[GO:0004420]	NA	map01130:Biosynthesis of antibiotics(reductase (NADPH)[ec:1.1.1.34]) ; map00900:Terpenoid backbone biosynthesis(reductase (NADPH)[ec:1.1.1.34])
TR40055|c1_g4_i1	281	7.54854e-61	98	194.897	52790405	HMGR	Salvia miltiorrhiza	NA	coenzyme A metabolic process[GO:0015936] ; oxidation-reduction process[GO:0055114]	coenzyme binding[GO:0050662] ; hydroxymethylglutaryl-CoA reductase (NADPH) activity[GO:0004420]	NA	map01130:Biosynthesis of antibiotics(reductase (NADPH)[ec:1.1.1.34]) ; map00900:Terpenoid backbone biosynthesis(reductase (NADPH)[ec:1.1.1.34])
TR34647|c1_g10_i2	405	3.44394e-67	96	217.238	52851182	alpha-amylase	Plantago major	NA	carbohydrate metabolic process[GO:0005975]	alpha-amylase activity[GO:0004556] ; calcium ion binding[GO:0005509]	NA	map00500:Starch and sucrose metabolism(glycogenase[ec:3.2.1.1])
TR34647|c1_g10_i1	602	2.87241e-64	95	212.616	52851182	alpha-amylase	Plantago major	NA	carbohydrate metabolic process[GO:0005975]	alpha-amylase activity[GO:0004556] ; calcium ion binding[GO:0005509]	NA	map00500:Starch and sucrose metabolism(glycogenase[ec:3.2.1.1])
TR38994|c0_g1_i2	780	8.50573e-99	86	298.13	52851192	phospholipase D	Plantago major	NA	metabolic process[GO:0008152]	catalytic activity[GO:0003824]	NA	NA
TR38994|c0_g1_i3	471	3.34215e-79	87	243.817	52851192	phospholipase D	Plantago major	NA	metabolic process[GO:0008152]	catalytic activity[GO:0003824]	NA	NA
TR38035|c0_g1_i6	566	1.14507e-34	97	128.642	52851194	putative transport protein	Plantago major	NA	molybdate ion transport[GO:0015689]	molybdate ion transmembrane transporter activity[GO:0015098]	integral component of membrane[GO:0016021]	NA
TR35827|c0_g2_i1	224	5.75046e-42	100	146.747	52851196	aminocyclopropan-1-carboxylate oxidase	Plantago major	NA	oxidation-reduction process[GO:0055114]	metal ion binding[GO:0046872] ; oxidoreductase activity[GO:0016491]	NA	NA
TR26898|c0_g1_i1	492	7.26685e-30	98	115.546	53748421	mitochondrial F0 ATP synthase beta chain	Plantago major	NA	ATP hydrolysis coupled proton transport[GO:0015991]	ATP binding[GO:0005524] ; hydrolase activity, acting on acid anhydrides, catalyzing transmembrane movement of substances[GO:0016820]	proton-transporting two-sector ATPase complex, catalytic domain[GO:0033178]	NA
TR39035|c0_g1_i1	555	1.72028e-60	84	194.512	53748429	endopeptidase 1	Plantago major	NA	proteolysis[GO:0006508]	peptidase activity[GO:0008233]	NA	NA
TR39035|c0_g1_i3	348	8.98947e-59	84	187.193	53748429	endopeptidase 1	Plantago major	NA	proteolysis[GO:0006508]	peptidase activity[GO:0008233]	NA	NA
TR39035|c0_g1_i4	224	6.11678e-33	83	119.013	53748429	endopeptidase 1	Plantago major	NA	proteolysis[GO:0006508]	peptidase activity[GO:0008233]	NA	NA
TR27695|c1_g1_i5	683	5.18858e-55	83	180.259	53748431	hypothetical protein	Plantago major	NA	NA	NA	NA	NA
TR27919|c0_g1_i2	950	2.6181e-122	81	365.54	53748435	hypothetical protein	Plantago major	NA	NA	NA	NA	NA
TR43661|c2_g5_i1	401	2.60123e-66	84	214.542	53748435	hypothetical protein	Plantago major	NA	NA	NA	NA	NA
TR42535|c1_g2_i1	299	2.29623e-35	81	131.724	53748435	hypothetical protein	Plantago major	NA	NA	NA	NA	NA
TR34994|c3_g1_i2	500	3.40395e-50	91	168.318	53748451	amino acid permease	Plantago major	NA	NA	NA	integral component of membrane[GO:0016021]	NA
TR36148|c0_g5_i1	424	3.34606e-20	97	89.7373	53748471	auxin resistance protein	Plantago major	NA	auxin-activated signaling pathway[GO:0009734] ; regulation of transcription, DNA-templated[GO:0006355] ; transcription, DNA-templated[GO:0006351]	NA	nucleus[GO:0005634]	NA
TR31333|c0_g2_i2	485	9.70443e-38	78	133.265	53748477	copper chaperone	Plantago major	NA	NA	NA	NA	NA
TR2350|c0_g2_i2	500	1.79845e-20	63	89.7373	53748497	major latex-like protein 1	Plantago major	NA	NA	NA	NA	NA
TR2350|c0_g1_i2	391	1.14386e-19	61	86.2705	53748497	major latex-like protein 1	Plantago major	NA	NA	NA	NA	NA
TR2350|c0_g2_i1	312	4.67893e-18	62	81.2629	53748497	major latex-like protein 1	Plantago major	NA	NA	NA	NA	NA
TR23174|c0_g1_i1	268	2.47298e-24	81	95.1301	54310818	phytosulfokine precursor	Avicennia marina	NA	cell proliferation[GO:0008283]	growth factor activity[GO:0008083]	extracellular region[GO:0005576]	NA
TR25573|c1_g1_i4	362	1.05702e-20	76	87.0409	54310818	phytosulfokine precursor	Avicennia marina	NA	NA	NA	NA	NA
TR23174|c0_g2_i1	394	4.42738e-19	79	82.8037	54310818	phytosulfokine precursor	Avicennia marina	NA	cell proliferation[GO:0008283]	growth factor activity[GO:0008083]	extracellular region[GO:0005576]	NA
TR25573|c1_g1_i3	759	2.36658e-18	76	83.9593	54310818	phytosulfokine precursor	Avicennia marina	NA	NA	NA	NA	NA
TR27815|c2_g1_i2	483	4.50214e-95	97	285.034	55294660	putative adenosylhomocysteinase	Nicotiana glauca	NA	one-carbon metabolic process[GO:0006730]	adenosylhomocysteinase activity[GO:0004013]	NA	map00270:Cysteine and methionine metabolism(S-adenosylhomocysteine synthase[ec:3.3.1.1])
TR26388|c0_g1_i3	274	4.09888e-16	97	73.1738	56412213	low temperature and salt responsive protein	Cenchrus americanus	NA	NA	NA	integral component of membrane[GO:0016021]	NA
TR39952|c2_g3_i2	277	2.6824e-35	98	124.02	56475232	ADP-glucose pyrophosphorylase	Gossypium bickii	NA	biosynthetic process[GO:0009058]	nucleotidyltransferase activity[GO:0016779]	NA	NA
TR39952|c2_g3_i3	669	2.28237e-31	98	118.627	56475232	ADP-glucose pyrophosphorylase	Gossypium bickii	NA	biosynthetic process[GO:0009058]	nucleotidyltransferase activity[GO:0016779]	NA	NA
TR2943|c0_g1_i1	657	1.05255e-125	90	367.466	56542457	Avr9/Cf-9 rapidly elicited protein 44	Nicotiana tabacum	NA	oxylipin biosynthetic process[GO:0031408] ; oxidation-reduction process[GO:0055114]	metal ion binding[GO:0046872] ; oxidoreductase activity, acting on single donors with incorporation of molecular oxygen, incorporation of two atoms of oxygen[GO:0016702]	NA	NA
TR43910|c2_g8_i2	308	1.87018e-62	98	200.29	56784145	P protein-like	Oryza sativa Japonica Group	NA	oxidation-reduction process[GO:0055114] ; glycine decarboxylation via glycine cleavage system[GO:0019464]	glycine dehydrogenase (decarboxylating) activity[GO:0004375] ; glycine binding[GO:0016594]	cytosol[GO:0005829] ; glycine cleavage complex[GO:0005960] ; mitochondrion[GO:0005739]	map00260:Glycine, serine and threonine metabolism(dehydrogenase (aminomethyl-transferring)[ec:1.4.4.2])
TR31747|c0_g2_i1	302	2.24875e-64	97	201.83	56784146	P protein-like	Oryza sativa Japonica Group	NA	oxidation-reduction process[GO:0055114] ; glycine decarboxylation via glycine cleavage system[GO:0019464]	glycine dehydrogenase (decarboxylating) activity[GO:0004375] ; glycine binding[GO:0016594]	cytosol[GO:0005829] ; glycine cleavage complex[GO:0005960] ; mitochondrion[GO:0005739]	map00260:Glycine, serine and threonine metabolism(dehydrogenase (aminomethyl-transferring)[ec:1.4.4.2])
TR39425|c0_g3_i6	425	1.57305e-97	100	293.893	56784185	clathrin-associated protein unc-101-like	Oryza sativa Japonica Group	NA	vesicle-mediated transport[GO:0016192] ; intracellular protein transport[GO:0006886]	NA	clathrin adaptor complex[GO:0030131]	NA
TR42612|c1_g1_i1	292	7.9028e-59	97	189.889	56967491	calcium-dependent/calmodulin-independent protein kinase	Panax ginseng	NA	protein phosphorylation[GO:0006468]	protein kinase activity[GO:0004672] ; calcium ion binding[GO:0005509] ; ATP binding[GO:0005524]	NA	NA
TR2337|c0_g1_i6	978	6.47935e-31	80	123.635	57013882	hypothetical protein NitaMp008	Nicotiana tabacum	NA	DNA integration[GO:0015074]	nucleic acid binding[GO:0003676]	mitochondrion[GO:0005739]	NA
TR48527|c0_g1_i1	446	6.39447e-50	97	164.851	57013900	hypothetical protein NitaMp027	Nicotiana tabacum	NA	NA	NA	mitochondrion[GO:0005739]	NA
TR28599|c0_g1_i1	246	1.07771e-44	93	157.918	57283137	villin 1	Nicotiana tabacum	NA	actin filament bundle assembly[GO:0051017]	actin filament binding[GO:0051015]	NA	NA
TR31408|c0_g2_i6	328	6.34683e-71	97	217.238	57471058	vacuolar ATP synthase	Aegiceras corniculatum	NA	ATP hydrolysis coupled proton transport[GO:0015991]	hydrogen ion transmembrane transporter activity[GO:0015078]	proton-transporting V-type ATPase, V0 domain[GO:0033179]	NA
TR11672|c0_g1_i1	302	1.95483e-63	98	196.823	57471060	plasma membrane H+-ATPase	Aegiceras corniculatum	NA	NA	metal ion binding[GO:0046872] ; nucleotide binding[GO:0000166]	NA	NA
TR37236|c0_g4_i5	225	1.38314e-40	100	145.206	58465454	GDP dissociation inhibitor 1	Solanum chilense	NA	protein transport[GO:0015031] ; regulation of catalytic activity[GO:0050790] ; oxidation-reduction process[GO:0055114]	Rab GDP-dissociation inhibitor activity[GO:0005093] ; oxidoreductase activity[GO:0016491]	NA	NA
TR40284|c1_g4_i2	758	2.33823e-91	98	278.87	58578268	ABC transporter protein	Capsicum chinense	NA	metabolic process[GO:0008152]	ATPase activity[GO:0016887] ; ATP binding[GO:0005524]	NA	map00230:Purine metabolism(adenylpyrophosphatase[ec:3.6.1.3])
TR40284|c1_g5_i1	248	6.64162e-37	97	132.109	58578268	ABC transporter protein	Capsicum chinense	NA	metabolic process[GO:0008152]	ATPase activity[GO:0016887] ; ATP binding[GO:0005524]	NA	map00230:Purine metabolism(adenylpyrophosphatase[ec:3.6.1.3])
TR40284|c1_g2_i1	282	8.71974e-15	94	73.1738	58578268	ABC transporter protein	Capsicum chinense	NA	metabolic process[GO:0008152]	ATPase activity[GO:0016887] ; ATP binding[GO:0005524]	NA	map00230:Purine metabolism(adenylpyrophosphatase[ec:3.6.1.3])
TR41596|c0_g2_i1	272	1.2369e-51	93	167.162	58802473	ornithine aminotransferase, partial	Solanum lycopersicum	NA	metabolic process[GO:0008152]	pyridoxal phosphate binding[GO:0030170] ; transaminase activity[GO:0008483]	NA	NA
TR32652|c2_g2_i1	232	4.93275e-16	98	75.8702	58979188	mitochondrial prohibitin 1	Petunia x hybrida	NA	NA	NA	membrane[GO:0016020]	NA
TR43145|c1_g8_i1	236	8.05012e-44	93	147.132	60391866	nitrite reductase	Fragaria x ananassa	NA	oxidation-reduction process[GO:0055114]	heme binding[GO:0020037] ; oxidoreductase activity[GO:0016491] ; iron-sulfur cluster binding[GO:0051536]	NA	NA
TR41683|c1_g1_i5	462	5.03491e-74	89	239.58	60650095	4-coumarate: CoA ligase	Scutellaria baicalensis	Lamiaceae	metabolic process[GO:0008152]	ligase activity[GO:0016874]	NA	NA
TR41683|c1_g1_i1	676	4.75165e-113	86	343.584	60650097	4-coumarate: CoA ligase	Scutellaria baicalensis	Lamiaceae	metabolic process[GO:0008152]	ligase activity[GO:0016874]	NA	NA
TR7956|c2_g4_i3	546	1.3932e-69	95	216.083	61104881	expansin 10	Cucumis sativus	NA	plant-type cell wall organization[GO:0009664]	NA	extracellular region[GO:0005576] ; cell wall[GO:0005618] ; membrane[GO:0016020]	NA
TR31197|c0_g1_i1	589	6.50596e-53	100	175.252	62286683	H2A_EUPESRecName: Full=Histone H2A	Euphorbia esula	NA	NA	protein heterodimerization activity[GO:0046982] ; DNA binding[GO:0003677]	nucleosome[GO:0000786] ; nucleus[GO:0005634]	NA
TR30597|c1_g1_i1	407	9.60384e-65	100	202.601	62287478	RS23_EUPESRecName: Full=40S ribosomal protein S23	Euphorbia esula	NA	translation[GO:0006412]	structural constituent of ribosome[GO:0003735]	small ribosomal subunit[GO:0015935]	NA
TR30597|c1_g5_i1	245	4.4613e-51	100	165.236	62287478	RS23_EUPESRecName: Full=40S ribosomal protein S23	Euphorbia esula	NA	translation[GO:0006412]	structural constituent of ribosome[GO:0003735]	small ribosomal subunit[GO:0015935]	NA
TR25323|c0_g1_i1	330	1.52511e-06	95	48.1358	62318771	putative ubiquitin activating enzyme	Arabidopsis thaliana	NA	NA	NA	NA	NA
TR8127|c1_g8_i1	417	5.13623e-37	98	132.88	62318795	ATP-citrate lyase subunit B	Arabidopsis thaliana	NA	NA	NA	NA	NA
TR37131|c0_g6_i1	317	2.18906e-38	94	134.42	62318887	glyceraldehyde 3-phosphate dehydrogenase A subunit	Arabidopsis thaliana	NA	NA	NA	NA	NA
TR33064|c0_g2_i1	386	9.46151e-67	97	211.075	62318989	cellulose synthase catalytic subunit	Arabidopsis thaliana	NA	NA	NA	NA	NA
TR23135|c0_g1_i2	544	1.15763e-40	93	140.969	62319049	NADP specific isocitrate dehydrogenase like protein	Arabidopsis thaliana	NA	NA	NA	NA	NA
TR30552|c0_g4_i1	273	1.49757e-56	100	180.644	62319198	RuBisCO subunit binding-protein beta subunit precursor	Arabidopsis thaliana	NA	NA	NA	NA	NA
TR41663|c2_g8_i1	267	1.44676e-41	97	142.124	62319198	RuBisCO subunit binding-protein beta subunit precursor	Arabidopsis thaliana	NA	NA	NA	NA	NA
TR25962|c0_g1_i1	255	4.46889e-50	98	164.081	62319204	ATP-dependent Clp protease, ATP-binding subunit	Arabidopsis thaliana	NA	NA	NA	NA	NA
TR28878|c2_g1_i2	246	4.00196e-35	98	125.561	62319277	glutamate-ammonia ligase precursor	Arabidopsis thaliana	NA	NA	NA	NA	NA
TR43594|c1_g9_i1	515	2.42078e-37	100	132.109	62319454	RNA helicase	Arabidopsis thaliana	NA	NA	NA	NA	NA
TR17074|c0_g1_i1	254	5.31428e-47	97	159.073	62319653	putative glucan synthase	Arabidopsis thaliana	NA	NA	NA	NA	NA
TR37932|c0_g5_i1	317	1.58433e-70	99	216.853	62320224	hypothetical protein	Arabidopsis thaliana	NA	NA	NA	NA	NA
TR39872|c0_g4_i2	436	1.47583e-15	74	73.9442	62321029	membrane related protein CP5	Arabidopsis thaliana	NA	NA	NA	NA	NA
TR43347|c2_g1_i2	641	2.00751e-151	98	432.95	62321049	vacuolar-type H+-ATPase subunit A	Arabidopsis thaliana	NA	NA	NA	NA	NA
TR37305|c0_g3_i1	479	9.66586e-44	98	153.295	62321401	enolase	Arabidopsis thaliana	NA	NA	NA	NA	NA
TR41470|c1_g6_i1	288	5.97669e-59	98	185.652	62321451	mitochondrial phosphate translocator	Arabidopsis thaliana	NA	NA	NA	NA	NA
TR7852|c2_g7_i1	296	1.61313e-45	91	152.14	62321465	hypothetical protein	Arabidopsis thaliana	NA	NA	NA	NA	NA
TR19191|c0_g1_i1	543	9.68781e-117	96	343.584	62321517	cytoplasmic aconitate hydratase	Arabidopsis thaliana	NA	NA	NA	NA	NA
TR37910|c0_g2_i1	615	2.49942e-136	98	395.971	62321559	cellulose synthase catalytic subunit	Arabidopsis thaliana	NA	NA	NA	NA	NA
TR21011|c0_g1_i1	280	1.84002e-62	100	197.593	62362578	elongation factor elF1-alpha, partial	Populus alba	NA	translational elongation[GO:0006414]	translation elongation factor activity[GO:0003746] ; GTP binding[GO:0005525] ; GTPase activity[GO:0003924]	NA	NA
TR32313|c0_g1_i3	1225	0	94	676.011	62461972	alcohol dehydrogenase-like protein	Ocimum basilicum	Lamiaceae	oxidation-reduction process[GO:0055114]	zinc ion binding[GO:0008270] ; oxidoreductase activity[GO:0016491]	NA	NA
TR29832|c0_g1_i2	1530	3.66505e-179	85	517.694	62461972	alcohol dehydrogenase-like protein	Ocimum basilicum	Lamiaceae	oxidation-reduction process[GO:0055114]	zinc ion binding[GO:0008270] ; oxidoreductase activity[GO:0016491]	NA	NA
TR29832|c0_g1_i6	1732	5.25046e-90	80	291.197	62461972	alcohol dehydrogenase-like protein	Ocimum basilicum	Lamiaceae	oxidation-reduction process[GO:0055114]	zinc ion binding[GO:0008270] ; oxidoreductase activity[GO:0016491]	NA	NA
TR32274|c1_g4_i2	826	1.15669e-162	97	464.151	62461974	alcohol dehydrogenase-like protein	Ocimum basilicum	Lamiaceae	metabolic process[GO:0008152]	coenzyme binding[GO:0050662] ; catalytic activity[GO:0003824]	integral component of membrane[GO:0016021]	NA
TR32274|c1_g4_i1	471	7.02269e-90	90	273.863	62461974	alcohol dehydrogenase-like protein	Ocimum basilicum	Lamiaceae	metabolic process[GO:0008152]	coenzyme binding[GO:0050662] ; catalytic activity[GO:0003824]	integral component of membrane[GO:0016021]	NA
TR32274|c0_g1_i1	772	2.22307e-83	99	261.536	62461974	alcohol dehydrogenase-like protein	Ocimum basilicum	Lamiaceae	metabolic process[GO:0008152]	coenzyme binding[GO:0050662] ; catalytic activity[GO:0003824]	integral component of membrane[GO:0016021]	NA
TR32274|c1_g5_i1	456	7.97069e-72	89	227.254	62461974	alcohol dehydrogenase-like protein	Ocimum basilicum	Lamiaceae	metabolic process[GO:0008152]	coenzyme binding[GO:0050662] ; catalytic activity[GO:0003824]	integral component of membrane[GO:0016021]	NA
TR32274|c1_g1_i1	232	1.34303e-14	94	72.7886	62461974	alcohol dehydrogenase-like protein	Ocimum basilicum	Lamiaceae	metabolic process[GO:0008152]	coenzyme binding[GO:0050662] ; catalytic activity[GO:0003824]	integral component of membrane[GO:0016021]	NA
TR41918|c0_g1_i5	280	2.69327e-18	86	80.4925	62734627	VHS domain	Oryza sativa Japonica Group	NA	intracellular protein transport[GO:0006886]	NA	intracellular[GO:0005622]	NA
TR39416|c2_g7_i4	697	1.34332e-95	96	287.345	62867578	hypothetical protein	Nicotiana tabacum	NA	NA	nucleic acid binding[GO:0003676] ; nucleotide binding[GO:0000166]	NA	NA
TR39416|c2_g2_i1	553	4.19764e-70	98	220.32	62867578	hypothetical protein	Nicotiana tabacum	NA	NA	nucleic acid binding[GO:0003676] ; nucleotide binding[GO:0000166]	NA	NA
TR39416|c2_g3_i1	266	6.42348e-55	97	177.178	62867578	hypothetical protein	Nicotiana tabacum	NA	NA	nucleic acid binding[GO:0003676] ; nucleotide binding[GO:0000166]	NA	NA
TR22200|c0_g1_i2	1974	0	80	787.719	62900763	SCS_SALOFRecName: Full=1,8-cineole synthase, chloroplastic; Short=SCS; Flags: Precursor	Salvia officinalis	Lamiaceae	metabolic process[GO:0008152]	magnesium ion binding[GO:0000287] ; terpene synthase activity[GO:0010333]	chloroplast[GO:0009507]	NA
TR28211|c0_g1_i2	683	7.806e-67	87	211.846	66096352	thioredoxin H	Nicotiana alata	NA	cell redox homeostasis[GO:0045454] ; glycerol ether metabolic process[GO:0006662] ; oxidation-reduction process[GO:0055114]	protein disulfide oxidoreductase activity[GO:0015035]	cell[GO:0005623]	NA
TR19539|c0_g1_i1	248	9.63536e-54	100	172.555	66814932	isocitrate dehydrogenase	Saltugilia splendens subsp. splendens	NA	isocitrate metabolic process[GO:0006102] ; oxidation-reduction process[GO:0055114]	NAD binding[GO:0051287] ; isocitrate dehydrogenase (NADP+) activity[GO:0004450] ; magnesium ion binding[GO:0000287]	NA	map00480:Glutathione metabolism(dehydrogenase (NADP+)[ec:1.1.1.42]) ; map01130:Biosynthesis of antibiotics(dehydrogenase (NADP+)[ec:1.1.1.42]) ; map00720:Carbon fixation pathways in prokaryotes(dehydrogenase (NADP+)[ec:1.1.1.42]) ; map00020:Citrate cycle (TCA cycle)(dehydrogenase (NADP+)[ec:1.1.1.42])
TR19914|c0_g1_i1	417	7.8302e-91	97	271.166	67906888	phenylalanine ammonia lyase	Citrus sinensis	NA	metabolic process[GO:0008152]	lyase activity[GO:0016829]	NA	NA
TR42371|c0_g1_i4	953	5.68727e-152	91	454.907	68033183	isoamylase	Ipomoea batatas	NA	carbohydrate metabolic process[GO:0005975]	hydrolase activity, hydrolyzing O-glycosyl compounds[GO:0004553]	NA	NA
TR38371|c0_g1_i5	572	1.42095e-101	94	300.442	68138964	pyruvate decarboxylase, partial	Citrus sinensis	NA	metabolic process[GO:0008152]	catalytic activity[GO:0003824] ; thiamine pyrophosphate binding[GO:0030976]	NA	NA
TR25549|c0_g1_i1	1060	5.18261e-122	85	360.918	68165948	caleosin B	Sesamum indicum	NA	NA	NA	integral component of membrane[GO:0016021]	NA
TR43772|c2_g3_i1	755	1.41075e-111	89	328.946	68300904	starch synthase isoform 2	Nicotiana langsdorffii x Nicotiana sanderae	NA	metabolic process[GO:0008152]	alpha-1,4-glucan synthase activity[GO:0033201] ; starch synthase activity[GO:0009011]	NA	map00500:Starch and sucrose metabolism(synthase (glycosyl-transferring)[ec:2.4.1.21])
TR42805|c1_g4_i2	941	2.10722e-118	98	352.058	70568805	cyclin-dependent kinase A1	Scutellaria baicalensis	Lamiaceae	protein phosphorylation[GO:0006468]	protein kinase activity[GO:0004672] ; ATP binding[GO:0005524]	NA	NA
TR42562|c0_g3_i3	1232	0	91	571.237	70568819	cyclin A	Scutellaria baicalensis	Lamiaceae	NA	NA	nucleus[GO:0005634]	NA
TR42562|c0_g3_i4	346	4.44746e-38	93	140.969	70568819	cyclin A	Scutellaria baicalensis	Lamiaceae	NA	NA	nucleus[GO:0005634]	NA
TR42562|c0_g1_i4	613	6.83541e-36	76	138.272	70568819	cyclin A	Scutellaria baicalensis	Lamiaceae	NA	NA	NA	NA
TR42562|c0_g1_i7	395	1.17066e-28	75	115.161	70568819	cyclin A	Scutellaria baicalensis	Lamiaceae	NA	NA	NA	NA
TR42562|c0_g2_i1	297	1.3447e-21	76	94.3597	70568819	cyclin A	Scutellaria baicalensis	Lamiaceae	NA	NA	NA	NA
TR38806|c1_g6_i1	383	2.64256e-68	88	218.779	70568824	cyclin D	Scutellaria baicalensis	Lamiaceae	NA	NA	nucleus[GO:0005634]	NA
TR38806|c1_g2_i1	490	2.18776e-39	70	144.821	70568824	cyclin D	Scutellaria baicalensis	Lamiaceae	NA	NA	NA	NA
TR4063|c0_g1_i7	390	5.44547e-21	78	92.8189	70568824	cyclin D	Scutellaria baicalensis	Lamiaceae	NA	NA	NA	NA
TR38806|c1_g1_i1	313	3.84828e-13	63	70.0922	70568824	cyclin D	Scutellaria baicalensis	Lamiaceae	NA	NA	NA	NA
TR37674|c0_g3_i1	1790	0	80	695.656	70724314	cytochrome P450 monooxygenase	Sesamum indicum	NA	oxidation-reduction process[GO:0055114]	heme binding[GO:0020037] ; oxidoreductase activity, acting on paired donors, with incorporation or reduction of molecular oxygen[GO:0016705] ; monooxygenase activity[GO:0004497] ; iron ion binding[GO:0005506]	NA	NA
TR35491|c1_g5_i1	294	1.07692e-59	95	187.578	70779671	putative alpha-expansin	Eucalyptus globulus	NA	plant-type cell wall organization[GO:0009664]	NA	extracellular region[GO:0005576] ; cell wall[GO:0005618] ; membrane[GO:0016020]	NA
TR39740|c2_g2_i1	233	9.5942e-35	90	124.02	71068117	delta-8 desaturase related-protein 1	Echium pitardii	NA	NA	NA	integral component of membrane[GO:0016021]	NA
TR36144|c0_g1_i1	1674	0	76	607.831	71480741	beta-1,3-glucanase	Camellia sinensis	NA	metabolic process[GO:0008152]	hydrolase activity, hydrolyzing O-glycosyl compounds[GO:0004553]	NA	NA
TR36144|c0_g1_i2	858	1.05914e-95	75	299.671	71480741	beta-1,3-glucanase	Camellia sinensis	NA	metabolic process[GO:0008152]	hydrolase activity, hydrolyzing O-glycosyl compounds[GO:0004553]	NA	NA
TR31236|c7_g2_i2	467	1.18711e-106	100	311.612	71534894	pentameric polyubiquitin	Medicago sativa	NA	NA	NA	NA	NA
TR15782|c0_g1_i1	402	4.64755e-92	100	273.092	71534916	putative splicing factor Prp8	Medicago sativa	NA	mRNA splicing, via spliceosome[GO:0000398]	U6 snRNA binding[GO:0017070]	spliceosomal complex[GO:0005681]	NA
TR43437|c1_g1_i5	247	4.13232e-27	87	107.457	71726860	metacaspase type II	Nicotiana benthamiana	NA	proteolysis[GO:0006508]	cysteine-type endopeptidase activity[GO:0004197]	NA	NA
TR32011|c0_g1_i3	455	1.15121e-99	96	296.59	73665943	putative cellulose synthase	Fagus sylvatica	NA	cellulose biosynthetic process[GO:0030244]	cellulose synthase (UDP-forming) activity[GO:0016760]	integral component of membrane[GO:0016021]	map00500:Starch and sucrose metabolism(synthase (UDP-forming)[ec:2.4.1.12])
TR32011|c0_g1_i2	435	5.91692e-94	96	281.952	73665943	putative cellulose synthase	Fagus sylvatica	NA	cellulose biosynthetic process[GO:0030244]	cellulose synthase (UDP-forming) activity[GO:0016760]	integral component of membrane[GO:0016021]	map00500:Starch and sucrose metabolism(synthase (UDP-forming)[ec:2.4.1.12])
TR28416|c0_g1_i2	321	5.66966e-70	97	215.698	73696164	neutral invertase	Nicotiana langsdorffii x Nicotiana sanderae	NA	metabolic process[GO:0008152]	glycopeptide alpha-N-acetylgalactosaminidase activity[GO:0033926] ; sucrose alpha-glucosidase activity[GO:0004575]	NA	map00500:Starch and sucrose metabolism(alpha-glucosidase[ec:3.2.1.48]) ; map00500:Starch and sucrose metabolism(invertase[ec:3.2.1.26]) ; map00052:Galactose metabolism(invertase[ec:3.2.1.26])
TR23478|c0_g2_i1	353	1.75222e-73	96	226.868	73912408	5-enolpyruvylshikimate-3-phosphate synthase	Lactuca sativa	NA	chorismate biosynthetic process[GO:0009423] ; aromatic amino acid family biosynthetic process[GO:0009073]	3-phosphoshikimate 1-carboxyvinyltransferase activity[GO:0003866]	NA	map01130:Biosynthesis of antibiotics(1-carboxyvinyltransferase[ec:2.5.1.19]) ; map00400:Phenylalanine, tyrosine and tryptophan biosynthesis(1-carboxyvinyltransferase[ec:2.5.1.19])
TR37454|c0_g2_i3	839	4.75815e-111	95	332.028	74027234	isopentenyl diphosphate isomerase	Ipomoea batatas	NA	isoprenoid biosynthetic process[GO:0008299]	hydrolase activity[GO:0016787] ; isopentenyl-diphosphate delta-isomerase activity[GO:0004452]	NA	map01130:Biosynthesis of antibiotics(Delta-isomerase[ec:5.3.3.2]) ; map00900:Terpenoid backbone biosynthesis(Delta-isomerase[ec:5.3.3.2])
TR37454|c0_g1_i1	365	8.51715e-76	95	235.343	74027234	isopentenyl diphosphate isomerase	Ipomoea batatas	NA	isoprenoid biosynthetic process[GO:0008299]	hydrolase activity[GO:0016787] ; isopentenyl-diphosphate delta-isomerase activity[GO:0004452]	NA	map01130:Biosynthesis of antibiotics(Delta-isomerase[ec:5.3.3.2]) ; map00900:Terpenoid backbone biosynthesis(Delta-isomerase[ec:5.3.3.2])
TR41914|c0_g2_i1	350	1.43005e-67	93	217.624	74148786	phosphoenolpyruvate carboxylase	Sesamum indicum	NA	tricarboxylic acid cycle[GO:0006099] ; carbon fixation[GO:0015977]	phosphoenolpyruvate carboxylase activity[GO:0008964]	NA	map00720:Carbon fixation pathways in prokaryotes(carboxylase[ec:4.1.1.31]) ; map00620:Pyruvate metabolism(carboxylase[ec:4.1.1.31]) ; map00710:Carbon fixation in photosynthetic organisms(carboxylase[ec:4.1.1.31]) ; map00680:Methane metabolism(carboxylase[ec:4.1.1.31])
TR41914|c0_g1_i1	344	1.22561e-63	93	207.223	74148786	phosphoenolpyruvate carboxylase	Sesamum indicum	NA	tricarboxylic acid cycle[GO:0006099] ; carbon fixation[GO:0015977]	phosphoenolpyruvate carboxylase activity[GO:0008964]	NA	map00720:Carbon fixation pathways in prokaryotes(carboxylase[ec:4.1.1.31]) ; map00620:Pyruvate metabolism(carboxylase[ec:4.1.1.31]) ; map00710:Carbon fixation in photosynthetic organisms(carboxylase[ec:4.1.1.31]) ; map00680:Methane metabolism(carboxylase[ec:4.1.1.31])
TR41805|c1_g5_i7	872	0	99	596.275	74486744	translation elongation factor 1A-9	Gossypium hirsutum	NA	translational elongation[GO:0006414]	translation elongation factor activity[GO:0003746] ; GTP binding[GO:0005525] ; GTPase activity[GO:0003924]	cytoplasm[GO:0005737]	NA
TR36925|c0_g4_i2	320	3.44217e-45	87	157.532	75129654	Q8OMT_MENPIRecName: Full=8-hydroxyquercetin 8-O-methyltransferase; AltName: Full=Flavonol 8-O-methyltransferase	Mentha piperita	Lamiaceae	methylation[GO:0032259] ; flavonoid metabolic process[GO:0009812]	8-hydroxyquercitin 8-O-methyltransferase activity[GO:0030761] ; O-methyltransferase activity[GO:0008171] ; protein dimerization activity[GO:0046983]	NA	NA
TR36925|c0_g2_i1	306	7.84176e-24	84	99.3673	75129654	Q8OMT_MENPIRecName: Full=8-hydroxyquercetin 8-O-methyltransferase; AltName: Full=Flavonol 8-O-methyltransferase	Mentha piperita	Lamiaceae	methylation[GO:0032259] ; flavonoid metabolic process[GO:0009812]	8-hydroxyquercitin 8-O-methyltransferase activity[GO:0030761] ; O-methyltransferase activity[GO:0008171] ; protein dimerization activity[GO:0046983]	NA	NA
TR31140|c2_g5_i1	440	3.23681e-83	92	256.914	75206691	DBR_TOBACRecName: Full=2-alkenal reductase (NADP(+)-dependent); AltName: Full=Alkenal double bound reductase; AltName: Full=Allylic alcohol dehydrogenase 1; Short=allyl-ADH1; AltName: Full=Flavin-free double bond reductase; Short=NtDBR; AltName: Full=Pulegone reductase; Short=NtRed-1	Nicotiana tabacum	NA	oxidation-reduction process[GO:0055114]	zinc ion binding[GO:0008270] ; oxidoreductase activity[GO:0016491]	NA	NA
TR30632|c0_g1_i3	885	1.57431e-11	89	70.4774	75224312	GERS_OCIBARecName: Full=Geraniol synthase, chloroplastic; Short=ObGES; Flags: Precursor	Ocimum basilicum	Lamiaceae	terpenoid biosynthetic process[GO:0016114] ; geranyl diphosphate metabolic process[GO:0033383]	terpene synthase activity[GO:0010333] ; manganese ion binding[GO:0030145] ; hydrolase activity[GO:0016787] ; magnesium ion binding[GO:0000287] ; protein homodimerization activity[GO:0042803]	chloroplast[GO:0009507]	NA
TR30632|c0_g1_i1	1105	2.82674e-11	89	70.8626	75224312	GERS_OCIBARecName: Full=Geraniol synthase, chloroplastic; Short=ObGES; Flags: Precursor	Ocimum basilicum	Lamiaceae	terpenoid biosynthetic process[GO:0016114] ; geranyl diphosphate metabolic process[GO:0033383]	terpene synthase activity[GO:0010333] ; manganese ion binding[GO:0030145] ; hydrolase activity[GO:0016787] ; magnesium ion binding[GO:0000287] ; protein homodimerization activity[GO:0042803]	chloroplast[GO:0009507]	NA
TR30632|c0_g1_i2	1374	5.08292e-11	89	70.8626	75224312	GERS_OCIBARecName: Full=Geraniol synthase, chloroplastic; Short=ObGES; Flags: Precursor	Ocimum basilicum	Lamiaceae	terpenoid biosynthetic process[GO:0016114] ; geranyl diphosphate metabolic process[GO:0033383]	terpene synthase activity[GO:0010333] ; manganese ion binding[GO:0030145] ; hydrolase activity[GO:0016787] ; magnesium ion binding[GO:0000287] ; protein homodimerization activity[GO:0042803]	chloroplast[GO:0009507]	NA
TR17485|c1_g1_i1	1466	0	90	752.666	75251477	TPSD_OCIBARecName: Full=Terpinolene synthase, chloroplastic; Flags: Precursor	Ocimum basilicum	Lamiaceae	terpenoid biosynthetic process[GO:0016114]	terpene synthase activity[GO:0010333] ; magnesium ion binding[GO:0000287]	chloroplast[GO:0009507]	NA
TR17485|c0_g2_i1	599	1.12488e-122	100	368.622	75251477	TPSD_OCIBARecName: Full=Terpinolene synthase, chloroplastic; Flags: Precursor	Ocimum basilicum	Lamiaceae	terpenoid biosynthetic process[GO:0016114]	terpene synthase activity[GO:0010333] ; magnesium ion binding[GO:0000287]	chloroplast[GO:0009507]	NA
TR35251|c0_g4_i1	1664	0	94	1012.68	75251478	MYRS_OCIBARecName: Full=Beta-myrcene synthase, chloroplastic; Flags: Precursor	Ocimum basilicum	Lamiaceae	terpenoid biosynthetic process[GO:0016114]	magnesium ion binding[GO:0000287] ; myrcene synthase activity[GO:0050551]	chloroplast[GO:0009507]	map00902:Monoterpenoid biosynthesis(synthase[ec:4.2.3.15])
TR22646|c0_g2_i2	494	2.91899e-55	77	191.045	75251478	MYRS_OCIBARecName: Full=Beta-myrcene synthase, chloroplastic; Flags: Precursor	Ocimum basilicum	Lamiaceae	metabolic process[GO:0008152]	terpene synthase activity[GO:0010333] ; metal ion binding[GO:0046872]	plastid[GO:0009536]	NA
TR35251|c0_g3_i1	277	1.64271e-53	96	182.956	75251478	MYRS_OCIBARecName: Full=Beta-myrcene synthase, chloroplastic; Flags: Precursor	Ocimum basilicum	Lamiaceae	terpenoid biosynthetic process[GO:0016114]	magnesium ion binding[GO:0000287] ; myrcene synthase activity[GO:0050551]	chloroplast[GO:0009507]	map00902:Monoterpenoid biosynthesis(synthase[ec:4.2.3.15])
TR35251|c0_g1_i2	281	7.69628e-31	89	120.553	75251478	MYRS_OCIBARecName: Full=Beta-myrcene synthase, chloroplastic; Flags: Precursor	Ocimum basilicum	Lamiaceae	terpenoid biosynthetic process[GO:0016114]	magnesium ion binding[GO:0000287] ; myrcene synthase activity[GO:0050551]	chloroplast[GO:0009507]	map00902:Monoterpenoid biosynthesis(synthase[ec:4.2.3.15])
TR35251|c0_g2_i1	303	9.88368e-22	100	95.5153	75251478	MYRS_OCIBARecName: Full=Beta-myrcene synthase, chloroplastic; Flags: Precursor	Ocimum basilicum	Lamiaceae	terpenoid biosynthetic process[GO:0016114]	magnesium ion binding[GO:0000287] ; myrcene synthase activity[GO:0050551]	chloroplast[GO:0009507]	map00902:Monoterpenoid biosynthesis(synthase[ec:4.2.3.15])
TR18263|c0_g1_i1	301	9.3581e-48	89	167.548	75251479	FES_OCIBARecName: Full=(-)-endo-fenchol synthase, chloroplastic; Flags: Precursor	Ocimum basilicum	Lamiaceae	terpenoid biosynthetic process[GO:0016114]	terpene synthase activity[GO:0010333] ; magnesium ion binding[GO:0000287] ; (-)-endo-fenchol synthase activity[GO:0050437]	chloroplast[GO:0009507]	map00902:Monoterpenoid biosynthesis(synthase[ec:4.2.3.10])
TR17485|c0_g1_i1	275	1.8743e-46	90	163.696	75251479	FES_OCIBARecName: Full=(-)-endo-fenchol synthase, chloroplastic; Flags: Precursor	Ocimum basilicum	Lamiaceae	terpenoid biosynthetic process[GO:0016114]	terpene synthase activity[GO:0010333] ; magnesium ion binding[GO:0000287] ; (-)-endo-fenchol synthase activity[GO:0050437]	chloroplast[GO:0009507]	map00902:Monoterpenoid biosynthesis(synthase[ec:4.2.3.10])
TR30632|c0_g2_i1	1966	0	99	1113.6	75251480	LLOS_OCIBARecName: Full=R-linalool synthase, chloroplastic; Flags: Precursor	Ocimum basilicum	Lamiaceae	terpenoid biosynthetic process[GO:0016114]	terpene synthase activity[GO:0010333] ; R-linalool synthase activity[GO:0034008] ; magnesium ion binding[GO:0000287]	chloroplast[GO:0009507]	map01130:Biosynthesis of antibiotics(synthase[ec:4.2.3.26]) ; map00902:Monoterpenoid biosynthesis(synthase[ec:4.2.3.26])
TR23832|c2_g1_i1	1815	0	98	1023.85	75251482	GCS1_OCIBARecName: Full=Gamma-cadinene synthase; AltName: Full=(+)-gamma-cadinene synthase	Ocimum basilicum	Lamiaceae	terpenoid biosynthetic process[GO:0016114]	magnesium ion binding[GO:0000287] ; terpene synthase activity[GO:0010333]	NA	NA
TR22373|c0_g1_i1	675	2.64599e-90	84	284.648	75251482	GCS1_OCIBARecName: Full=Gamma-cadinene synthase; AltName: Full=(+)-gamma-cadinene synthase	Ocimum basilicum	Lamiaceae	terpenoid biosynthetic process[GO:0016114]	magnesium ion binding[GO:0000287] ; terpene synthase activity[GO:0010333]	NA	NA
TR22373|c0_g1_i2	918	4.37329e-39	80	151.369	75251482	GCS1_OCIBARecName: Full=Gamma-cadinene synthase; AltName: Full=(+)-gamma-cadinene synthase	Ocimum basilicum	Lamiaceae	terpenoid biosynthetic process[GO:0016114]	magnesium ion binding[GO:0000287] ; terpene synthase activity[GO:0010333]	NA	NA
TR30531|c1_g2_i1	486	0.000441722	59	45.4394	75251482	GCS1_OCIBARecName: Full=Gamma-cadinene synthase; AltName: Full=(+)-gamma-cadinene synthase	Ocimum basilicum	Lamiaceae	NA	NA	NA	NA
TR40960|c1_g3_i1	919	0	96	544.273	75251483	GDS_OCIBARecName: Full=Germacrene-D synthase; AltName: Full=(-)-germacrene D synthase	Ocimum basilicum	Lamiaceae	terpenoid biosynthetic process[GO:0016114]	magnesium ion binding[GO:0000287] ; terpene synthase activity[GO:0010333]	NA	NA
TR40960|c1_g2_i5	594	1.05586e-136	97	402.905	75251483	GDS_OCIBARecName: Full=Germacrene-D synthase; AltName: Full=(-)-germacrene D synthase	Ocimum basilicum	Lamiaceae	terpenoid biosynthetic process[GO:0016114]	magnesium ion binding[GO:0000287] ; terpene synthase activity[GO:0010333]	NA	NA
TR40960|c1_g3_i5	529	2.6317e-113	97	342.043	75251483	GDS_OCIBARecName: Full=Germacrene-D synthase; AltName: Full=(-)-germacrene D synthase	Ocimum basilicum	Lamiaceae	terpenoid biosynthetic process[GO:0016114]	magnesium ion binding[GO:0000287] ; terpene synthase activity[GO:0010333]	NA	NA
TR40960|c1_g2_i1	401	3.15561e-88	98	275.404	75251483	GDS_OCIBARecName: Full=Germacrene-D synthase; AltName: Full=(-)-germacrene D synthase	Ocimum basilicum	Lamiaceae	terpenoid biosynthetic process[GO:0016114]	magnesium ion binding[GO:0000287] ; terpene synthase activity[GO:0010333]	NA	NA
TR40960|c1_g2_i3	371	8.2805e-82	99	258.455	75251483	GDS_OCIBARecName: Full=Germacrene-D synthase; AltName: Full=(-)-germacrene D synthase	Ocimum basilicum	Lamiaceae	terpenoid biosynthetic process[GO:0016114]	magnesium ion binding[GO:0000287] ; terpene synthase activity[GO:0010333]	NA	NA
TR40960|c1_g3_i3	314	1.85134e-62	97	206.838	75251483	GDS_OCIBARecName: Full=Germacrene-D synthase; AltName: Full=(-)-germacrene D synthase	Ocimum basilicum	Lamiaceae	terpenoid biosynthetic process[GO:0016114]	magnesium ion binding[GO:0000287] ; terpene synthase activity[GO:0010333]	NA	NA
TR40960|c1_g2_i7	498	3.66179e-60	96	203.371	75251483	GDS_OCIBARecName: Full=Germacrene-D synthase; AltName: Full=(-)-germacrene D synthase	Ocimum basilicum	Lamiaceae	terpenoid biosynthetic process[GO:0016114]	magnesium ion binding[GO:0000287] ; terpene synthase activity[GO:0010333]	NA	NA
TR40960|c1_g8_i1	269	1.44527e-55	98	187.963	75251483	GDS_OCIBARecName: Full=Germacrene-D synthase; AltName: Full=(-)-germacrene D synthase	Ocimum basilicum	Lamiaceae	terpenoid biosynthetic process[GO:0016114]	magnesium ion binding[GO:0000287] ; terpene synthase activity[GO:0010333]	NA	NA
TR40960|c1_g5_i1	306	1.82663e-54	96	185.267	75251483	GDS_OCIBARecName: Full=Germacrene-D synthase; AltName: Full=(-)-germacrene D synthase	Ocimum basilicum	Lamiaceae	terpenoid biosynthetic process[GO:0016114]	magnesium ion binding[GO:0000287] ; terpene synthase activity[GO:0010333]	NA	NA
TR40960|c1_g2_i2	281	2.32191e-53	96	182.185	75251483	GDS_OCIBARecName: Full=Germacrene-D synthase; AltName: Full=(-)-germacrene D synthase	Ocimum basilicum	Lamiaceae	terpenoid biosynthetic process[GO:0016114]	magnesium ion binding[GO:0000287] ; terpene synthase activity[GO:0010333]	NA	NA
TR40960|c1_g2_i4	245	1.53674e-49	98	171.014	75251483	GDS_OCIBARecName: Full=Germacrene-D synthase; AltName: Full=(-)-germacrene D synthase	Ocimum basilicum	Lamiaceae	terpenoid biosynthetic process[GO:0016114]	magnesium ion binding[GO:0000287] ; terpene synthase activity[GO:0010333]	NA	NA
TR2361|c2_g1_i3	720	2.1674e-46	72	169.474	75251483	GDS_OCIBARecName: Full=Germacrene-D synthase; AltName: Full=(-)-germacrene D synthase	Ocimum basilicum	Lamiaceae	metabolic process[GO:0008152]	metal ion binding[GO:0046872] ; lyase activity[GO:0016829]	NA	NA
TR53134|c0_g1_i1	269	9.96814e-12	97	66.6254	75251483	GDS_OCIBARecName: Full=Germacrene-D synthase; AltName: Full=(-)-germacrene D synthase	Ocimum basilicum	Lamiaceae	terpenoid biosynthetic process[GO:0016114]	magnesium ion binding[GO:0000287] ; terpene synthase activity[GO:0010333]	NA	NA
TR38364|c4_g2_i5	1725	0	84	632.869	75251484	SELS_OCIBARecName: Full=Selinene synthase	Ocimum basilicum	Lamiaceae	terpenoid biosynthetic process[GO:0016114]	magnesium ion binding[GO:0000287] ; terpene synthase activity[GO:0010333]	NA	NA
TR38364|c4_g2_i7	708	3.02584e-105	83	323.939	75251484	SELS_OCIBARecName: Full=Selinene synthase	Ocimum basilicum	Lamiaceae	terpenoid biosynthetic process[GO:0016114]	magnesium ion binding[GO:0000287] ; terpene synthase activity[GO:0010333]	NA	NA
TR18300|c1_g1_i1	494	1.73902e-82	85	261.922	75251484	SELS_OCIBARecName: Full=Selinene synthase	Ocimum basilicum	Lamiaceae	terpenoid biosynthetic process[GO:0016114]	magnesium ion binding[GO:0000287] ; terpene synthase activity[GO:0010333]	NA	NA
TR22616|c0_g1_i1	335	8.9978e-50	85	173.326	75251484	SELS_OCIBARecName: Full=Selinene synthase	Ocimum basilicum	Lamiaceae	terpenoid biosynthetic process[GO:0016114]	magnesium ion binding[GO:0000287] ; terpene synthase activity[GO:0010333]	NA	NA
TR38364|c2_g1_i1	286	6.58263e-34	89	128.642	75251484	SELS_OCIBARecName: Full=Selinene synthase	Ocimum basilicum	Lamiaceae	terpenoid biosynthetic process[GO:0016114]	magnesium ion binding[GO:0000287] ; terpene synthase activity[GO:0010333]	NA	NA
TR37452|c0_g5_i1	675	2.99281e-99	96	300.442	75288825	HPPR_SOLSCRecName: Full=Hydroxyphenylpyruvate reductase; Short=HPPR	Plectranthus scutellarioides	Lamiaceae	oxidation-reduction process[GO:0055114]	NAD binding[GO:0051287] ; hydroxyphenylpyruvate reductase activity[GO:0047995]	NA	map00130:Ubiquinone and other terpenoid-quinone biosynthesis(reductase[ec:1.1.1.237]) ; map00350:Tyrosine metabolism(reductase[ec:1.1.1.237]) ; map00360:Phenylalanine metabolism(reductase[ec:1.1.1.237]) ; map00960:Tropane, piperidine and pyridine alkaloid biosynthesis(reductase[ec:1.1.1.237])
TR37452|c0_g7_i3	294	9.6383e-54	91	177.948	75288825	HPPR_SOLSCRecName: Full=Hydroxyphenylpyruvate reductase; Short=HPPR	Plectranthus scutellarioides	Lamiaceae	oxidation-reduction process[GO:0055114]	NAD binding[GO:0051287] ; hydroxyphenylpyruvate reductase activity[GO:0047995]	NA	map00130:Ubiquinone and other terpenoid-quinone biosynthesis(reductase[ec:1.1.1.237]) ; map00350:Tyrosine metabolism(reductase[ec:1.1.1.237]) ; map00360:Phenylalanine metabolism(reductase[ec:1.1.1.237]) ; map00960:Tropane, piperidine and pyridine alkaloid biosynthesis(reductase[ec:1.1.1.237])
TR37452|c0_g7_i2	468	1.35674e-48	92	167.162	75288825	HPPR_SOLSCRecName: Full=Hydroxyphenylpyruvate reductase; Short=HPPR	Plectranthus scutellarioides	Lamiaceae	oxidation-reduction process[GO:0055114]	NAD binding[GO:0051287] ; hydroxyphenylpyruvate reductase activity[GO:0047995]	NA	map00130:Ubiquinone and other terpenoid-quinone biosynthesis(reductase[ec:1.1.1.237]) ; map00350:Tyrosine metabolism(reductase[ec:1.1.1.237]) ; map00360:Phenylalanine metabolism(reductase[ec:1.1.1.237]) ; map00960:Tropane, piperidine and pyridine alkaloid biosynthesis(reductase[ec:1.1.1.237])
TR38687|c2_g3_i1	349	1.78411e-71	96	225.328	75301087	RPO2A_TOBACRecName: Full=DNA-directed RNA polymerase 2A; AltName: Full=NictaRpoT2-syl; AltName: Full=T7 bacteriophage-type single subunit RNA polymerase 2A	Nicotiana tabacum	NA	transcription, DNA-templated[GO:0006351]	DNA-directed RNA polymerase activity[GO:0003899] ; DNA binding[GO:0003677]	NA	map00240:Pyrimidine metabolism(RNA polymerase[ec:2.7.7.6]) ; map00230:Purine metabolism(RNA polymerase[ec:2.7.7.6])
TR43420|c0_g2_i2	305	2.87737e-11	86	64.6994	75301087	RPO2A_TOBACRecName: Full=DNA-directed RNA polymerase 2A; AltName: Full=NictaRpoT2-syl; AltName: Full=T7 bacteriophage-type single subunit RNA polymerase 2A	Nicotiana tabacum	NA	transcription, DNA-templated[GO:0006351]	DNA-directed RNA polymerase activity[GO:0003899] ; DNA binding[GO:0003677]	NA	map00240:Pyrimidine metabolism(RNA polymerase[ec:2.7.7.6]) ; map00230:Purine metabolism(RNA polymerase[ec:2.7.7.6])
TR29288|c0_g1_i4	544	5.2158e-45	64	158.688	75330977	DIV_ANTMARecName: Full=Transcription factor DIVARICATA	Antirrhinum majus	NA	flower development[GO:0009908] ; determination of dorsal/ventral asymmetry[GO:0048262]	NA	NA	NA
TR41969|c0_g6_i2	697	1.1422e-52	67	183.726	75335451	NEK6_ARATHRecName: Full=Serine/threonine-protein kinase Nek6; AltName: Full=NimA-related protein kinase 6; Short=AtNek6	Arabidopsis thaliana	NA	NA	NA	NA	NA
TR32075|c1_g1_i1	1127	0	88	579.711	75338881	5GT2_PERFRRecName: Full=Anthocyanidin 3-O-glucoside 5-O-glucosyltransferase 2; AltName: Full=UDP-glucose:anthocyanin 5-O-glucosyltransferase 3R6; Short=p3R6; Flags: Precursor	Perilla frutescens	Lamiaceae	anthocyanin-containing compound biosynthetic process[GO:0009718]	transferase activity, transferring hexosyl groups[GO:0016758]	NA	NA
TR43329|c0_g3_i2	267	6.9763e-44	86	146.747	75755853	TO37-3	Taraxacum officinale	NA	G-protein coupled receptor signaling pathway[GO:0007186] ; metabolic process[GO:0008152]	guanyl nucleotide binding[GO:0019001] ; G-protein beta/gamma-subunit complex binding[GO:0031683] ; signal transducer activity[GO:0004871] ; GTPase activity[GO:0003924]	NA	NA
TR17329|c0_g1_i1	228	9.83715e-28	79	103.219	75755859	TO37-12rc	Taraxacum officinale	NA	oxidation-reduction process[GO:0055114]	oxidoreductase activity[GO:0016491]	NA	NA
TR32235|c2_g1_i7	283	1.32486e-30	84	115.931	76097531	putative ethylene responsive element-DREB	Capsicum annuum	NA	regulation of transcription, DNA-templated[GO:0006355] ; transcription, DNA-templated[GO:0006351]	transcription factor activity, sequence-specific DNA binding[GO:0003700] ; DNA binding[GO:0003677]	nucleus[GO:0005634]	NA
TR3778|c0_g1_i4	338	6.89607e-29	96	109.383	76573351	unknown	Solanum tuberosum	NA	fatty acid biosynthetic process[GO:0006633]	NA	NA	NA
TR32974|c0_g2_i2	2246	1.25196e-138	53	452.595	77555253	retrotransposon protein, putative, Ty1-copia subclass	Oryza sativa Japonica Group	NA	NA	NA	NA	NA
TR34746|c0_g2_i1	572	6.21362e-92	94	280.796	77744911	chloroplast lipocalin	Ipomoea nil	NA	NA	NA	NA	NA
TR1181|c0_g2_i1	233	9.54618e-27	100	100.523	77799148	putative chloroplast chlorophyll A-B binding protein type I	Sorghum bicolor	NA	photosynthesis, light harvesting[GO:0009765] ; protein-chromophore linkage[GO:0018298]	chlorophyll binding[GO:0016168]	photosystem II[GO:0009523] ; integral component of membrane[GO:0016021] ; chloroplast[GO:0009507]	NA
TR1181|c0_g2_i2	246	5.36558e-22	100	88.1965	77799148	putative chloroplast chlorophyll A-B binding protein type I	Sorghum bicolor	NA	photosynthesis, light harvesting[GO:0009765] ; protein-chromophore linkage[GO:0018298]	chlorophyll binding[GO:0016168]	photosystem II[GO:0009523] ; integral component of membrane[GO:0016021] ; chloroplast[GO:0009507]	NA
TR33190|c0_g1_i1	308	1.03031e-62	96	200.675	77992951	plasma membrane intrinsic protein	Olea europaea	NA	transport[GO:0006810]	transporter activity[GO:0005215]	integral component of membrane[GO:0016021]	NA
TR33190|c0_g3_i2	302	4.47254e-60	97	193.741	77992951	plasma membrane intrinsic protein	Olea europaea	NA	transport[GO:0006810]	transporter activity[GO:0005215]	integral component of membrane[GO:0016021]	NA
TR40870|c2_g9_i1	498	1.89865e-68	94	215.312	78191055	lycopene beta-cyclase	Nicotiana langsdorffii x Nicotiana sanderae	NA	oxidation-reduction process[GO:0055114] ; carotenoid biosynthetic process[GO:0016117]	oxidoreductase activity, acting on paired donors, with incorporation or reduction of molecular oxygen[GO:0016705]	NA	NA
TR7830|c0_g1_i1	306	8.9081e-70	100	214.542	78499573	actin	Salvia miltiorrhiza	NA	NA	NA	NA	NA
TR19328|c0_g2_i1	252	2.98432e-18	100	79.337	81073957	polyubiquitin-like	Solanum tuberosum	NA	NA	NA	NA	NA
TR38235|c0_g1_i2	1141	5.59367e-120	73	360.918	81074526	Aux/IAA protein-like	Solanum tuberosum	NA	cellular process[GO:0009987] ; regulation of cellular process[GO:0050794]	NA	NA	NA
TR38235|c0_g1_i1	1120	1.74755e-118	75	356.681	81074526	Aux/IAA protein-like	Solanum tuberosum	NA	cellular process[GO:0009987] ; regulation of cellular process[GO:0050794]	NA	NA	NA
TR30171|c0_g3_i6	370	3.43856e-34	70	128.642	81074526	Aux/IAA protein-like	Solanum tuberosum	NA	NA	NA	NA	NA
TR30171|c0_g8_i1	249	1.17724e-15	65	75.8702	81074526	Aux/IAA protein-like	Solanum tuberosum	NA	NA	NA	NA	NA
TR38235|c0_g1_i7	253	1.43707e-15	77	75.8702	81074526	Aux/IAA protein-like	Solanum tuberosum	NA	cellular process[GO:0009987] ; regulation of cellular process[GO:0050794]	NA	NA	NA
TR51054|c0_g1_i1	286	1.31977e-17	100	83.1889	81075407	S-adenosyl-L-homocysteine hydrolase-like	Solanum tuberosum	NA	one-carbon metabolic process[GO:0006730]	adenosylhomocysteinase activity[GO:0004013]	NA	map00270:Cysteine and methionine metabolism(S-adenosylhomocysteine synthase[ec:3.3.1.1])
TR42582|c0_g8_i1	231	5.62426e-45	94	155.221	82400158	glutamate--tRNA ligase-like protein	Solanum tuberosum	NA	glutamyl-tRNA aminoacylation[GO:0006424]	ATP binding[GO:0005524] ; glutamate-tRNA ligase activity[GO:0004818]	cytoplasm[GO:0005737]	map00860:Porphyrin and chlorophyll metabolism(ligase[ec:6.1.1.17]) ; map00970:Aminoacyl-tRNA biosynthesis(ligase[ec:6.1.1.17])
TR7870|c0_g1_i2	639	3.1277e-98	93	298.13	82470795	S-RNase-binding protein	Petunia integrifolia subsp. inflata	NA	regulation of defense response[GO:0031347] ; protein ubiquitination[GO:0016567]	ubiquitin-protein transferase activity[GO:0004842] ; zinc ion binding[GO:0008270]	nucleus[GO:0005634]	NA
TR36051|c0_g1_i1	486	1.89873e-84	95	255.758	82569017	thermospermine synthase	Plantago major	NA	metabolic process[GO:0008152]	catalytic activity[GO:0003824]	NA	NA
TR19108|c0_g1_i1	319	2.38334e-72	99	221.09	82569023	methionine synthase	Plantago major	NA	methionine biosynthetic process[GO:0009086] ; methylation[GO:0032259]	zinc ion binding[GO:0008270] ; 5-methyltetrahydropteroyltriglutamate-homocysteine S-methyltransferase activity[GO:0003871]	NA	map00450:Selenocompound metabolism(S-methyltransferase[ec:2.1.1.14]) ; map00270:Cysteine and methionine metabolism(S-methyltransferase[ec:2.1.1.14])
TR41735|c1_g2_i1	260	5.85256e-57	100	181.03	82569023	methionine synthase	Plantago major	NA	methionine biosynthetic process[GO:0009086] ; methylation[GO:0032259]	zinc ion binding[GO:0008270] ; 5-methyltetrahydropteroyltriglutamate-homocysteine S-methyltransferase activity[GO:0003871]	NA	map00450:Selenocompound metabolism(S-methyltransferase[ec:2.1.1.14]) ; map00270:Cysteine and methionine metabolism(S-methyltransferase[ec:2.1.1.14])
TR25803|c0_g1_i2	427	5.8519e-53	97	173.326	82569023	methionine synthase	Plantago major	NA	methionine biosynthetic process[GO:0009086] ; methylation[GO:0032259]	zinc ion binding[GO:0008270] ; 5-methyltetrahydropteroyltriglutamate-homocysteine S-methyltransferase activity[GO:0003871]	NA	map00450:Selenocompound metabolism(S-methyltransferase[ec:2.1.1.14]) ; map00270:Cysteine and methionine metabolism(S-methyltransferase[ec:2.1.1.14])
TR22892|c0_g2_i2	253	6.4262e-36	95	127.102	82569023	methionine synthase	Plantago major	NA	methionine biosynthetic process[GO:0009086] ; methylation[GO:0032259]	zinc ion binding[GO:0008270] ; 5-methyltetrahydropteroyltriglutamate-homocysteine S-methyltransferase activity[GO:0003871]	NA	map00450:Selenocompound metabolism(S-methyltransferase[ec:2.1.1.14]) ; map00270:Cysteine and methionine metabolism(S-methyltransferase[ec:2.1.1.14])
TR22892|c0_g2_i1	305	4.89598e-27	94	104.76	82569023	methionine synthase	Plantago major	NA	methionine biosynthetic process[GO:0009086] ; methylation[GO:0032259]	zinc ion binding[GO:0008270] ; 5-methyltetrahydropteroyltriglutamate-homocysteine S-methyltransferase activity[GO:0003871]	NA	map00450:Selenocompound metabolism(S-methyltransferase[ec:2.1.1.14]) ; map00270:Cysteine and methionine metabolism(S-methyltransferase[ec:2.1.1.14])
TR30777|c0_g6_i1	266	8.81103e-31	100	112.079	82623421	hypothetical protein	Solanum tuberosum	NA	translation[GO:0006412]	structural constituent of ribosome[GO:0003735]	ribosome[GO:0005840]	NA
TR2571|c0_g1_i5	954	2.06922e-131	93	382.104	82698815	dehydroascorbate reductase	Sesamum indicum	NA	NA	NA	NA	NA
TR2571|c0_g1_i4	644	1.68207e-106	93	314.694	82698815	dehydroascorbate reductase	Sesamum indicum	NA	NA	NA	NA	NA
TR3118|c0_g1_i1	611	1.01935e-87	85	267.7	82734203	squamosa protein	Misopates orontium	NA	regulation of transcription, DNA-templated[GO:0006355] ; transcription, DNA-templated[GO:0006351]	transcription factor activity, sequence-specific DNA binding[GO:0003700] ; DNA binding[GO:0003677] ; protein dimerization activity[GO:0046983]	nucleus[GO:0005634]	NA
TR27281|c0_g1_i1	1202	0	99	656.751	84027871	EOMT1_OCIBARecName: Full=Eugenol O-methyltransferase; AltName: Full=(Iso)eugenol O-methyltransferase EOMT1; AltName: Full=S-adenosysl-L-methionine:(Iso)eugenol O-methyltransferase EOMT1	Ocimum basilicum	Lamiaceae	methylation[GO:0032259] ; phenylpropanoid biosynthetic process[GO:0009699]	protein dimerization activity[GO:0046983] ; (iso)eugenol O-methyltransferase activity[GO:0050630]	NA	map00940:Phenylpropanoid biosynthesis(O-methyltransferase[ec:2.1.1.146])
TR43014|c2_g1_i1	232	8.00329e-47	98	162.925	84468300	putative adenosylhomocysteinase	Trifolium pratense	NA	one-carbon metabolic process[GO:0006730]	adenosylhomocysteinase activity[GO:0004013]	NA	map00270:Cysteine and methionine metabolism(S-adenosylhomocysteine synthase[ec:3.3.1.1])
TR42338|c0_g2_i8	524	8.36183e-60	95	201.06	84468442	putative rubisco subunit binding-protein alpha subunit	Trifolium pratense	NA	protein refolding[GO:0042026]	ATP binding[GO:0005524]	cytoplasm[GO:0005737]	NA
TR40375|c1_g3_i2	2828	2.98363e-79	46	281.182	84569878	transposase	Zea mays	NA	NA	NA	NA	NA
TR41088|c0_g2_i3	690	4.90249e-109	97	328.561	85700246	acetoacetyl-CoA thiolase	Picrorhiza kurrooa	NA	metabolic process[GO:0008152]	transferase activity, transferring acyl groups other than amino-acyl groups[GO:0016747]	NA	NA
TR41088|c0_g6_i1	327	9.72099e-23	100	97.0561	85700246	acetoacetyl-CoA thiolase	Picrorhiza kurrooa	NA	metabolic process[GO:0008152]	transferase activity, transferring acyl groups other than amino-acyl groups[GO:0016747]	NA	NA
TR37965|c0_g1_i9	799	2.03583e-78	76	256.144	86155941	putative WRKY1b transcription factor	Coffea arabica	NA	NA	NA	NA	NA
TR33133|c0_g7_i8	887	4.7355e-15	71	75.8702	87133588	succinate dehydrogenase subunit 4	Populus deltoides	NA	NA	NA	NA	NA
TR33133|c0_g7_i7	459	8.05606e-13	69	67.781	87133588	succinate dehydrogenase subunit 4	Populus deltoides	NA	NA	NA	NA	NA
TR38245|c0_g2_i2	257	1.50787e-53	97	170.244	87247463	putative chloroplast fructose-bisphosphate aldolase	Populus x canadensis	NA	glycolytic process[GO:0006096]	fructose-bisphosphate aldolase activity[GO:0004332]	NA	map00030:Pentose phosphate pathway(aldolase[ec:4.1.2.13]) ; map01130:Biosynthesis of antibiotics(aldolase[ec:4.1.2.13]) ; map00051:Fructose and mannose metabolism(aldolase[ec:4.1.2.13]) ; map00710:Carbon fixation in photosynthetic organisms(aldolase[ec:4.1.2.13]) ; map00010:Glycolysis / Gluconeogenesis(aldolase[ec:4.1.2.13]) ; map00680:Methane metabolism(aldolase[ec:4.1.2.13])
TR34503|c1_g3_i1	236	8.38238e-49	98	157.918	87247463	putative chloroplast fructose-bisphosphate aldolase	Populus x canadensis	NA	glycolytic process[GO:0006096]	fructose-bisphosphate aldolase activity[GO:0004332]	NA	map00030:Pentose phosphate pathway(aldolase[ec:4.1.2.13]) ; map01130:Biosynthesis of antibiotics(aldolase[ec:4.1.2.13]) ; map00051:Fructose and mannose metabolism(aldolase[ec:4.1.2.13]) ; map00710:Carbon fixation in photosynthetic organisms(aldolase[ec:4.1.2.13]) ; map00010:Glycolysis / Gluconeogenesis(aldolase[ec:4.1.2.13]) ; map00680:Methane metabolism(aldolase[ec:4.1.2.13])
TR37329|c0_g2_i4	467	3.28662e-45	87	152.14	88193121	ribosomal protein S14	Luzula sylvatica	NA	translation[GO:0006412]	structural constituent of ribosome[GO:0003735]	ribosome[GO:0005840] ; mitochondrion[GO:0005739]	NA
TR37329|c0_g2_i1	837	8.63137e-45	88	155.221	88193121	ribosomal protein S14	Luzula sylvatica	NA	translation[GO:0006412]	structural constituent of ribosome[GO:0003735]	ribosome[GO:0005840] ; mitochondrion[GO:0005739]	NA
TR33133|c0_g4_i1	340	2.62344e-16	80	75.8702	88660666	succinate dehydrogenase subunit 4	Populus trichocarpa	NA	NA	NA	integral component of membrane[GO:0016021] ; mitochondrion[GO:0005739]	NA
TR33133|c0_g14_i1	348	2.02691e-13	78	68.1662	88660666	succinate dehydrogenase subunit 4	Populus trichocarpa	NA	NA	NA	membrane[GO:0016020]	NA
TR25931|c0_g1_i1	1191	9.45167e-14	52	78.5666	89953444	Fgenesh protein 73	Beta vulgaris	NA	NA	NA	NA	NA
TR14949|c0_g1_i1	233	6.90865e-46	96	154.066	90296193	plastid fructose bisphosphate aldolase	Stevia rebaudiana	NA	glycolytic process[GO:0006096]	fructose-bisphosphate aldolase activity[GO:0004332]	NA	map00030:Pentose phosphate pathway(aldolase[ec:4.1.2.13]) ; map01130:Biosynthesis of antibiotics(aldolase[ec:4.1.2.13]) ; map00051:Fructose and mannose metabolism(aldolase[ec:4.1.2.13]) ; map00710:Carbon fixation in photosynthetic organisms(aldolase[ec:4.1.2.13]) ; map00010:Glycolysis / Gluconeogenesis(aldolase[ec:4.1.2.13]) ; map00680:Methane metabolism(aldolase[ec:4.1.2.13])
TR39049|c0_g14_i1	668	5.75233e-62	76	203.756	90656518	xyloglucan endotransglucosylase XET2	Capsicum annuum	NA	cell wall organization or biogenesis[GO:0071554] ; cellular glucan metabolic process[GO:0006073] ; cellular component organization or biogenesis[GO:0071840]	hydrolase activity, acting on glycosyl bonds[GO:0016798] ; transferase activity[GO:0016740]	extracellular region[GO:0005576]	NA
TR39049|c0_g8_i1	287	3.59973e-50	92	167.933	90656520	xyloglucan endotransglucosylase XET3	Capsicum annuum	NA	cell wall organization[GO:0071555] ; xyloglucan metabolic process[GO:0010411] ; cell wall biogenesis[GO:0042546]	xyloglucan:xyloglucosyl transferase activity[GO:0016762] ; hydrolase activity, hydrolyzing O-glycosyl compounds[GO:0004553]	cell wall[GO:0005618] ; apoplast[GO:0048046]	NA
TR39143|c1_g2_i2	498	2.10228e-43	100	150.984	91940067	alpha-tubulin	Striga asiatica	NA	microtubule-based process[GO:0007017] ; metabolic process[GO:0008152]	structural constituent of cytoskeleton[GO:0005200] ; GTP binding[GO:0005525] ; GTPase activity[GO:0003924]	microtubule[GO:0005874]	NA
TR36537|c2_g2_i5	238	2.8495e-45	98	151.754	91940160	S phase protein	Striga asiatica	NA	translation[GO:0006412]	structural constituent of ribosome[GO:0003735]	ribosome[GO:0005840]	NA
TR41043|c0_g9_i3	407	5.57768e-68	91	211.46	93277268	putative sucrose transport protein SUT1	Nicotiana langsdorffii x Nicotiana sanderae	NA	NA	NA	integral component of membrane[GO:0016021]	NA
TR33020|c0_g2_i1	374	7.02387e-20	90	87.0409	93280152	Joka20	Nicotiana plumbaginifolia	NA	translation[GO:0006412]	structural constituent of ribosome[GO:0003735]	ribosome[GO:0005840]	NA
TR36897|c2_g5_i1	654	1.03319e-49	97	169.474	93359564	PP2c	Phaseolus vulgaris	NA	protein dephosphorylation[GO:0006470]	metal ion binding[GO:0046872] ; protein serine/threonine phosphatase activity[GO:0004722]	NA	NA
TR39756|c1_g5_i1	224	6.42329e-44	94	147.517	94442934	nucleotide sugar epimerase-like protein	Platanus x acerifolia	NA	metabolic process[GO:0008152]	coenzyme binding[GO:0050662] ; catalytic activity[GO:0003824]	NA	NA
TR20833|c0_g1_i3	353	9.79837e-11	95	59.6918	94442936	translation initiation factor eIF-1A-like	Platanus x acerifolia	NA	translational initiation[GO:0006413]	translation initiation factor activity[GO:0003743]	NA	NA
TR4826|c0_g1_i1	329	2.99593e-13	80	67.0106	95116517	40S ribosomal protein S3	Theobroma cacao	NA	translation[GO:0006412]	structural constituent of ribosome[GO:0003735] ; RNA binding[GO:0003723]	ribosome[GO:0005840]	NA
TR42502|c1_g1_i1	245	6.63484e-32	85	120.168	98979401	lipoxygenase 6	Actinidia deliciosa	NA	oxidation-reduction process[GO:0055114]	metal ion binding[GO:0046872] ; oxidoreductase activity, acting on single donors with incorporation of molecular oxygen, incorporation of two atoms of oxygen[GO:0016702]	NA	NA
TR32977|c0_g5_i3	284	2.09768e-25	100	97.8265	102139932	proteasome subunit alpha type 2 (20S proteasome alpha subunit B) (proteasome endopeptidase complex), putative	Musa acuminata	NA	ubiquitin-dependent protein catabolic process[GO:0006511]	threonine-type endopeptidase activity[GO:0004298]	cytoplasm[GO:0005737] ; proteasome core complex, alpha-subunit complex[GO:0019773] ; nucleus[GO:0005634]	NA
TR29702|c0_g4_i1	789	6.85686e-62	68	204.912	104391599	plasma membrane intrinsic protein	Olea europaea	NA	NA	NA	NA	NA
TR29702|c0_g4_i3	956	1.20336e-61	68	206.453	104391599	plasma membrane intrinsic protein	Olea europaea	NA	NA	NA	NA	NA
TR29702|c0_g4_i2	900	1.45269e-47	64	169.088	104391599	plasma membrane intrinsic protein	Olea europaea	NA	NA	NA	NA	NA
TR7805|c1_g5_i3	435	1.14236e-33	77	126.716	104569511	chloroplast chlorophyll a/b-binding protein, partial	Solanum nigrum	NA	NA	NA	NA	NA
TR32843|c1_g4_i1	263	2.67949e-13	82	68.1662	106879565	histone H1	Plantago major	NA	nucleosome assembly[GO:0006334]	DNA binding[GO:0003677]	nucleosome[GO:0000786] ; nucleus[GO:0005634]	NA
TR3152|c0_g3_i3	296	1.27139e-36	98	128.257	106879589	glyceraldehyde-3-phosphate dehydrogenase	Plantago major	NA	oxidation-reduction process[GO:0055114]	glyceraldehyde-3-phosphate dehydrogenase (NAD+) (phosphorylating) activity[GO:0004365]	NA	map01130:Biosynthesis of antibiotics(dehydrogenase (phosphorylating)[ec:1.2.1.12]) ; map00710:Carbon fixation in photosynthetic organisms(dehydrogenase (phosphorylating)[ec:1.2.1.12]) ; map00010:Glycolysis / Gluconeogenesis(dehydrogenase (phosphorylating)[ec:1.2.1.12])
TR39143|c1_g6_i2	568	2.69478e-140	100	401.364	106879605	alpha tubulin	Plantago major	NA	microtubule-based process[GO:0007017] ; metabolic process[GO:0008152]	structural constituent of cytoskeleton[GO:0005200] ; GTP binding[GO:0005525] ; GTPase activity[GO:0003924]	microtubule[GO:0005874]	NA
TR33237|c1_g3_i3	543	1.30869e-133	100	384.03	106879605	alpha tubulin	Plantago major	NA	microtubule-based process[GO:0007017] ; metabolic process[GO:0008152]	structural constituent of cytoskeleton[GO:0005200] ; GTP binding[GO:0005525] ; GTPase activity[GO:0003924]	microtubule[GO:0005874]	NA
TR39143|c1_g6_i6	376	1.73357e-89	100	269.626	106879605	alpha tubulin	Plantago major	NA	microtubule-based process[GO:0007017] ; metabolic process[GO:0008152]	structural constituent of cytoskeleton[GO:0005200] ; GTP binding[GO:0005525] ; GTPase activity[GO:0003924]	microtubule[GO:0005874]	NA
TR39143|c1_g6_i7	261	1.94155e-61	100	196.052	106879605	alpha tubulin	Plantago major	NA	microtubule-based process[GO:0007017] ; metabolic process[GO:0008152]	structural constituent of cytoskeleton[GO:0005200] ; GTP binding[GO:0005525] ; GTPase activity[GO:0003924]	microtubule[GO:0005874]	NA
TR33237|c1_g3_i2	263	3.99702e-61	100	195.282	106879605	alpha tubulin	Plantago major	NA	microtubule-based process[GO:0007017] ; metabolic process[GO:0008152]	structural constituent of cytoskeleton[GO:0005200] ; GTP binding[GO:0005525] ; GTPase activity[GO:0003924]	microtubule[GO:0005874]	NA
TR2548|c0_g3_i2	287	1.14372e-17	79	80.4925	106879607	jacalin-domain protein	Plantago major	NA	NA	NA	NA	NA
TR16158|c0_g1_i1	346	1.73657e-74	97	227.639	106879615	mitochondrial ATP synthase, beta chain	Plantago major	NA	ATP hydrolysis coupled proton transport[GO:0015991]	ATP binding[GO:0005524] ; hydrolase activity, acting on acid anhydrides, catalyzing transmembrane movement of substances[GO:0016820]	proton-transporting two-sector ATPase complex, catalytic domain[GO:0033178]	NA
TR7055|c0_g1_i1	577	2.64671e-22	84	96.2857	106879615	mitochondrial ATP synthase, beta chain	Plantago major	NA	ATP hydrolysis coupled proton transport[GO:0015991]	ATP binding[GO:0005524] ; hydrolase activity, acting on acid anhydrides, catalyzing transmembrane movement of substances[GO:0016820]	proton-transporting two-sector ATPase complex, catalytic domain[GO:0033178]	NA
TR7805|c1_g3_i1	446	1.30839e-49	96	168.318	106879623	Photosystem II, 22 kDa Protein	Plantago major	NA	NA	NA	NA	NA
TR7805|c1_g8_i1	269	2.2043e-31	98	118.242	106879623	Photosystem II, 22 kDa Protein	Plantago major	NA	NA	NA	NA	NA
TR43749|c0_g4_i2	265	5.70226e-48	95	160.229	106879625	photoperiodic response / GIGANTEA	Plantago major	NA	NA	NA	NA	NA
TR26211|c0_g1_i2	414	1.71335e-19	93	87.8113	106879625	photoperiodic response / GIGANTEA	Plantago major	NA	NA	NA	NA	NA
TR38912|c2_g2_i1	258	1.40718e-20	67	87.4261	106879635	BAG-domain protein 1 / regulator of cell death	Plantago major	NA	NA	NA	NA	NA
TR38912|c2_g1_i4	476	3.02778e-17	47	80.8777	106879635	BAG-domain protein 1 / regulator of cell death	Plantago major	NA	NA	NA	NA	NA
TR52907|c0_g1_i1	272	5.77795e-39	82	136.346	108248026	tom1 protein	Nicotiana benthamiana	NA	NA	NA	integral component of membrane[GO:0016021]	NA
TR43165|c1_g2_i1	1060	1.74325e-37	67	143.665	108863081	polyprotein	Prunus avium	NA	NA	NA	NA	NA
TR34503|c1_g2_i3	224	1.46428e-41	97	142.895	108864053	Fructose-bisphosphate aldolase, chloroplast precursor, putative, expressed	Oryza sativa Japonica Group	NA	glycolytic process[GO:0006096]	fructose-bisphosphate aldolase activity[GO:0004332]	NA	map00030:Pentose phosphate pathway(aldolase[ec:4.1.2.13]) ; map01130:Biosynthesis of antibiotics(aldolase[ec:4.1.2.13]) ; map00051:Fructose and mannose metabolism(aldolase[ec:4.1.2.13]) ; map00710:Carbon fixation in photosynthetic organisms(aldolase[ec:4.1.2.13]) ; map00010:Glycolysis / Gluconeogenesis(aldolase[ec:4.1.2.13]) ; map00680:Methane metabolism(aldolase[ec:4.1.2.13])
TR7888|c0_g5_i1	320	5.41677e-10	71	60.077	108936786	hypothetical protein 11	Plantago major	NA	NA	NA	NA	NA
TR33412|c0_g2_i3	521	4.6245e-24	92	101.293	109631202	SRR217	Striga asiatica	NA	phosphorelay signal transduction system[GO:0000160]	NA	intracellular[GO:0005622]	NA
TR33868|c1_g4_i2	344	1.25378e-25	96	98.9821	110224758	putative ubiquitin protein 2	Platanus x acerifolia	NA	NA	NA	NA	NA
TR41686|c0_g5_i1	243	2.25501e-17	97	76.2554	110224758	putative ubiquitin protein 2	Platanus x acerifolia	NA	NA	NA	NA	NA
TR26144|c0_g1_i1	1168	2.14453e-146	93	424.861	110377772	chloroplast pigment-binding protein CP24	Nicotiana tabacum	NA	photosynthesis, light harvesting[GO:0009765] ; protein-chromophore linkage[GO:0018298]	chlorophyll binding[GO:0016168]	photosystem II[GO:0009523] ; integral component of membrane[GO:0016021] ; chloroplast[GO:0009507]	NA
TR37149|c1_g3_i6	299	1.7082e-50	91	166.777	110737342	putative GTP pyrophosphokinase	Arabidopsis thaliana	NA	NA	NA	NA	NA
TR23374|c0_g1_i1	307	9.29304e-65	99	205.297	110738814	putative receptor-like kinase	Arabidopsis thaliana	NA	NA	NA	NA	NA
TR44418|c1_g6_i1	292	3.34885e-60	98	193.356	110738814	putative receptor-like kinase	Arabidopsis thaliana	NA	NA	NA	NA	NA
TR43848|c1_g3_i1	622	7.71872e-97	94	293.508	110739265	heat shock like protein	Arabidopsis thaliana	NA	NA	NA	NA	NA
TR33708|c0_g1_i3	237	3.66017e-45	94	152.525	110739886	omega-3 fatty acid desaturase	Arabidopsis thaliana	NA	NA	NA	NA	NA
TR43199|c1_g2_i1	581	9.79255e-60	91	196.052	110739982	hypothetical protein	Arabidopsis thaliana	NA	NA	NA	NA	NA
TR43009|c2_g2_i1	224	8.14919e-46	100	153.68	110740136	HEAT SHOCK PROTEIN 81-2	Arabidopsis thaliana	NA	NA	NA	NA	NA
TR34673|c2_g2_i1	361	2.90305e-76	94	230.72	110740671	very-long-chain fatty acid condensing enzyme CUT1 like protein	Arabidopsis thaliana	NA	NA	NA	NA	NA
TR12900|c0_g1_i1	230	5.91731e-42	94	146.362	111162653	transketolase, partial	Nicotiana attenuata	NA	NA	NA	NA	NA
TR3696|c1_g1_i1	979	1.01541e-124	83	378.637	111182621	sabinene synthase	Salvia pomifera	Lamiaceae	metabolic process[GO:0008152]	magnesium ion binding[GO:0000287] ; terpene synthase activity[GO:0010333]	NA	NA
TR3696|c1_g1_i3	589	2.65946e-65	80	219.164	111182621	sabinene synthase	Salvia pomifera	Lamiaceae	metabolic process[GO:0008152]	magnesium ion binding[GO:0000287] ; terpene synthase activity[GO:0010333]	NA	NA
TR19971|c0_g1_i1	310	1.59116e-33	96	119.398	111227972	ubiquitin	Morus bombycis	NA	NA	NA	NA	NA
TR53093|c0_g1_i1	1396	0	100	689.493	112030956	photosystem II protein D1	Phaseolus vulgaris	NA	protein-chromophore linkage[GO:0018298] ; response to herbicide[GO:0009635] ; photosynthetic electron transport in photosystem II[GO:0009772]	chlorophyll binding[GO:0016168] ; metal ion binding[GO:0046872] ; oxidoreductase activity[GO:0016491] ; electron transporter, transferring electrons within the cyclic electron transport pathway of photosynthesis activity[GO:0045156]	integral component of membrane[GO:0016021] ; chloroplast thylakoid membrane[GO:0009535] ; photosystem II[GO:0009523]	NA
TR37001|c0_g6_i2	351	2.43567e-60	90	189.504	112185624	fructose-bisphosphate aldolase	Plantago major	NA	glycolytic process[GO:0006096]	fructose-bisphosphate aldolase activity[GO:0004332]	NA	map00030:Pentose phosphate pathway(aldolase[ec:4.1.2.13]) ; map01130:Biosynthesis of antibiotics(aldolase[ec:4.1.2.13]) ; map00051:Fructose and mannose metabolism(aldolase[ec:4.1.2.13]) ; map00710:Carbon fixation in photosynthetic organisms(aldolase[ec:4.1.2.13]) ; map00010:Glycolysis / Gluconeogenesis(aldolase[ec:4.1.2.13]) ; map00680:Methane metabolism(aldolase[ec:4.1.2.13])
TR37682|c0_g1_i3	332	1.05992e-61	98	195.667	112256986	PPi-dependent phosphofructokinase beta subunit	Cuscuta pentagona	NA	glycolytic process through fructose-6-phosphate[GO:0061615] ; fructose 6-phosphate metabolic process[GO:0006002]	6-phosphofructokinase activity[GO:0003872]	NA	map00030:Pentose phosphate pathway(phosphohexokinase[ec:2.7.1.11]) ; map01130:Biosynthesis of antibiotics(phosphohexokinase[ec:2.7.1.11]) ; map00052:Galactose metabolism(phosphohexokinase[ec:2.7.1.11]) ; map00051:Fructose and mannose metabolism(phosphohexokinase[ec:2.7.1.11]) ; map00010:Glycolysis / Gluconeogenesis(phosphohexokinase[ec:2.7.1.11]) ; map00680:Methane metabolism(phosphohexokinase[ec…
TR36944|c0_g1_i1	1114	0	97	650.973	112419535	RAD51 homolog	Populus nigra	NA	homologous recombination-dependent replication fork processing[GO:1990426] ; double-strand break repair via homologous recombination[GO:0000724]	double-stranded DNA binding[GO:0003690] ; ATP binding[GO:0005524] ; recombinase activity[GO:0000150] ; single-stranded DNA binding[GO:0003697] ; DNA-dependent ATPase activity[GO:0008094]	NA	NA
TR28049|c3_g1_i1	225	8.50567e-44	96	147.902	112791581	S-adenosyl-L-homocysteine hydrolase, partial	Caragana jubata	NA	one-carbon metabolic process[GO:0006730]	adenosylhomocysteinase activity[GO:0004013]	NA	map00270:Cysteine and methionine metabolism(S-adenosylhomocysteine synthase[ec:3.3.1.1])
TR41819|c3_g7_i1	306	4.19063e-63	97	201.445	112806948	cinnamate 4-hydroxylase	Solanum melongena	NA	oxidation-reduction process[GO:0055114]	heme binding[GO:0020037] ; trans-cinnamate 4-monooxygenase activity[GO:0016710] ; iron ion binding[GO:0005506]	NA	map00130:Ubiquinone and other terpenoid-quinone biosynthesis(4-monooxygenase[ec:1.14.13.11]) ; map00945:Stilbenoid, diarylheptanoid and gingerol biosynthesis(4-monooxygenase[ec:1.14.13.11]) ; map00941:Flavonoid biosynthesis(4-monooxygenase[ec:1.14.13.11]) ; map00940:Phenylpropanoid biosynthesis(4-monooxygenase[ec:1.14.13.11]) ; map00360:Phenylalanine metabolism(4-monooxygenase[ec:1.14.13.11])
TR43404|c1_g3_i3	458	6.50577e-99	97	292.738	112806956	phenylalanine ammonia-lyase	Solanum melongena	NA	metabolic process[GO:0008152]	ammonia-lyase activity[GO:0016841]	NA	NA
TR3360|c0_g1_i1	388	3.69147e-84	98	254.218	112806956	phenylalanine ammonia-lyase	Solanum melongena	NA	metabolic process[GO:0008152]	ammonia-lyase activity[GO:0016841]	NA	NA
TR30514|c0_g2_i2	245	4.24061e-50	97	161.384	112950127	GDP-mannose 3,5-epimerase	Vitis vinifera	NA	metabolic process[GO:0008152]	GDP-mannose 3,5-epimerase activity[GO:0047918]	NA	map00053:Ascorbate and aldarate metabolism(3,5-epimerase[ec:5.1.3.18]) ; map00520:Amino sugar and nucleotide sugar metabolism(3,5-epimerase[ec:5.1.3.18])
TR38184|c0_g2_i1	288	1.66598e-56	95	183.341	113205152	Serine/threonine-protein kinase AtPK19 , putative	Solanum lycopersicum	NA	protein phosphorylation[GO:0006468]	ATP binding[GO:0005524] ; protein serine/threonine kinase activity[GO:0004674]	NA	NA
TR42381|c1_g2_i1	302	7.97456e-30	95	118.242	113205153	hypothetical protein LES1_20t00006	Solanum lycopersicum	NA	NA	NA	NA	NA
TR37194|c1_g1_i4	302	1.17557e-41	92	141.354	113205229	Senescence-associated protein, putative	Solanum demissum	NA	NA	NA	integral component of membrane[GO:0016021]	NA
TR38084|c1_g2_i1	372	2.70683e-68	96	213.772	113207075	deficiens H68 homologue	Misopates orontium	NA	regulation of transcription, DNA-templated[GO:0006355] ; transcription, DNA-templated[GO:0006351]	transcription factor activity, sequence-specific DNA binding[GO:0003700] ; DNA binding[GO:0003677] ; protein dimerization activity[GO:0046983]	nucleus[GO:0005634]	NA
TR41735|c1_g3_i1	1583	0	97	802.742	113473614	methionine synthase	Orobanche ramosa	NA	methionine biosynthetic process[GO:0009086] ; methylation[GO:0032259]	zinc ion binding[GO:0008270] ; 5-methyltetrahydropteroyltriglutamate-homocysteine S-methyltransferase activity[GO:0003871]	NA	map00450:Selenocompound metabolism(S-methyltransferase[ec:2.1.1.14]) ; map00270:Cysteine and methionine metabolism(S-methyltransferase[ec:2.1.1.14])
TR41735|c1_g4_i1	395	1.42298e-89	100	284.263	113473614	methionine synthase	Orobanche ramosa	NA	methionine biosynthetic process[GO:0009086] ; methylation[GO:0032259]	zinc ion binding[GO:0008270] ; 5-methyltetrahydropteroyltriglutamate-homocysteine S-methyltransferase activity[GO:0003871]	NA	map00450:Selenocompound metabolism(S-methyltransferase[ec:2.1.1.14]) ; map00270:Cysteine and methionine metabolism(S-methyltransferase[ec:2.1.1.14])
TR29658|c1_g1_i1	775	1.03442e-133	94	394.815	113912327	putative alcohol acyltransferase 1	Lavandula angustifolia	Lamiaceae	metabolic process[GO:0008152]	transferase activity, transferring acyl groups other than amino-acyl groups[GO:0016747]	NA	NA
TR8020|c0_g1_i6	1039	0	90	579.711	113912329	putative alcohol acyltransferase 2	Lavandula angustifolia	Lamiaceae	metabolic process[GO:0008152]	transferase activity, transferring acyl groups other than amino-acyl groups[GO:0016747]	NA	NA
TR8020|c0_g1_i3	1622	0	92	802.357	113912329	putative alcohol acyltransferase 2	Lavandula angustifolia	Lamiaceae	metabolic process[GO:0008152]	transferase activity, transferring acyl groups other than amino-acyl groups[GO:0016747]	NA	NA
TR8020|c0_g1_i1	393	1.16323e-61	86	203.756	113912329	putative alcohol acyltransferase 2	Lavandula angustifolia	Lamiaceae	metabolic process[GO:0008152]	transferase activity, transferring acyl groups other than amino-acyl groups[GO:0016747]	NA	NA
TR8020|c0_g1_i4	254	2.9373e-51	98	174.096	113912329	putative alcohol acyltransferase 2	Lavandula angustifolia	Lamiaceae	metabolic process[GO:0008152]	transferase activity, transferring acyl groups other than amino-acyl groups[GO:0016747]	NA	NA
TR18626|c0_g2_i1	242	2.62224e-52	98	168.318	115253056	beta-tubulin 6	Oryza sativa Indica Group	NA	microtubule-based process[GO:0007017] ; metabolic process[GO:0008152]	structural constituent of cytoskeleton[GO:0005200] ; GTP binding[GO:0005525] ; GTPase activity[GO:0003924]	microtubule[GO:0005874]	NA
TR40858|c0_g4_i2	385	1.04652e-31	83	115.931	115279798	transcription factor IIIA	Solanum lycopersicum	NA	NA	metal ion binding[GO:0046872] ; nucleic acid binding[GO:0003676]	NA	NA
TR3660|c0_g3_i2	546	4.95682e-28	80	108.612	115279798	transcription factor IIIA	Solanum lycopersicum	NA	NA	metal ion binding[GO:0046872] ; nucleic acid binding[GO:0003676]	NA	NA
TR29835|c0_g1_i1	860	1.32944e-115	100	347.436	115361537	S-adenosyl-L-methionine synthase	Nicotiana suaveolens	NA	S-adenosylmethionine biosynthetic process[GO:0006556] ; one-carbon metabolic process[GO:0006730]	methionine adenosyltransferase activity[GO:0004478] ; metal ion binding[GO:0046872] ; ATP binding[GO:0005524]	NA	map00270:Cysteine and methionine metabolism(adenosyltransferase[ec:2.5.1.6])
TR29835|c0_g1_i2	500	2.31637e-102	100	308.531	115361537	S-adenosyl-L-methionine synthase	Nicotiana suaveolens	NA	S-adenosylmethionine biosynthetic process[GO:0006556] ; one-carbon metabolic process[GO:0006730]	methionine adenosyltransferase activity[GO:0004478] ; metal ion binding[GO:0046872] ; ATP binding[GO:0005524]	NA	map00270:Cysteine and methionine metabolism(adenosyltransferase[ec:2.5.1.6])
TR39820|c1_g3_i2	303	4.31675e-25	97	100.908	115430413	putative vacuolar H+-ATPase catalytic subunit A	Populus alba	NA	ATP hydrolysis coupled proton transport[GO:0015991]	ATP binding[GO:0005524] ; hydrolase activity, acting on acid anhydrides, catalyzing transmembrane movement of substances[GO:0016820]	proton-transporting two-sector ATPase complex, catalytic domain[GO:0033178]	NA
TR28347|c0_g1_i2	351	8.21012e-30	96	109.768	115436156	Os01g0304000	Oryza sativa Japonica Group	NA	cytoplasmic translation[GO:0002181]	structural constituent of ribosome[GO:0003735]	cytosolic large ribosomal subunit[GO:0022625]	NA
TR36768|c1_g2_i1	227	2.59448e-29	100	112.079	115443689	Os02g0105900	Oryza sativa Japonica Group	NA	translation[GO:0006412]	structural constituent of ribosome[GO:0003735] ; rRNA binding[GO:0019843]	cytosolic small ribosomal subunit[GO:0022627]	NA
TR41273|c1_g3_i3	467	6.89497e-32	56	125.176	115446615	Os02g0549200	Oryza sativa Japonica Group	NA	NA	NA	NA	NA
TR35957|c1_g10_i1	664	6.19808e-39	98	137.887	115450713	Os03g0146300	Oryza sativa Japonica Group	NA	mitotic cell cycle[GO:0000278] ; stomatal lineage progression[GO:0010440] ; negative regulation of cyclin-dependent protein serine/threonine kinase activity[GO:0045736] ; phosphatidylinositol biosynthetic process[GO:0006661] ; cell division[GO:0051301] ; DNA endoreduplication[GO:0042023]	cyclin-dependent protein serine/threonine kinase regulator activity[GO:0016538]	cytoplasm[GO:0005737]	NA
TR8302|c0_g1_i2	715	3.80175e-150	97	429.098	115452795	Os03g0328000	Oryza sativa Japonica Group	NA	sterol biosynthetic process[GO:0016126] ; cytokinesis by cell plate formation[GO:0000911] ; actin nucleation[GO:0045010] ; regulation of meristem growth[GO:0010075] ; determination of bilateral symmetry[GO:0009855] ; microtubule nucleation[GO:0007020] ; acetyl-CoA metabolic process[GO:0006084] ; vesicle-mediated transport[GO:0016192] ; trichome morphogenesis[GO:0010090] ; small GTPase mediated si…	guanyl-nucleotide exchange factor activity[GO:0005085]	cytosol[GO:0005829] ; endoplasmic reticulum exit site[GO:0070971] ; plasma membrane[GO:0005886] ; nucleus[GO:0005634] ; extrinsic component of membrane[GO:0019898]	NA
TR31478|c0_g1_i1	490	3.20431e-51	100	171.785	115454207	Os03g0626800	Oryza sativa Japonica Group	NA	NA	calcium ion binding[GO:0005509]	NA	NA
TR43983|c2_g1_i2	1042	0	98	654.44	115454339	Os03g0646800	Oryza sativa Japonica Group	NA	transcription from RNA polymerase II promoter[GO:0006366]	RNA polymerase II activity[GO:0001055] ; DNA binding[GO:0003677] ; ribonucleoside binding[GO:0032549]	DNA-directed RNA polymerase II, core complex[GO:0005665]	NA
TR34752|c0_g5_i1	227	6.83088e-29	100	106.686	115460334	Os04g0601800	Oryza sativa Japonica Group	NA	positive regulation of transcription, DNA-templated[GO:0045893] ; tRNA metabolic process[GO:0006399] ; regulation of protein dephosphorylation[GO:0035304] ; endonucleolytic cleavage of tetracistronic rRNA transcript (SSU-rRNA, LSU-rRNA, 4.5S-rRNA, 5S-rRNA)[GO:0002103] ; photosystem II assembly[GO:0010207] ; chloroplast relocation[GO:0009902] ; leaf morphogenesis[GO:0009965] ; cell differentiation…	NA	chloroplast[GO:0009507]	NA
TR34752|c0_g4_i1	357	6.74458e-18	100	80.1073	115460334	Os04g0601800	Oryza sativa Japonica Group	NA	positive regulation of transcription, DNA-templated[GO:0045893] ; tRNA metabolic process[GO:0006399] ; regulation of protein dephosphorylation[GO:0035304] ; endonucleolytic cleavage of tetracistronic rRNA transcript (SSU-rRNA, LSU-rRNA, 4.5S-rRNA, 5S-rRNA)[GO:0002103] ; photosystem II assembly[GO:0010207] ; chloroplast relocation[GO:0009902] ; leaf morphogenesis[GO:0009965] ; cell differentiation…	NA	chloroplast[GO:0009507]	NA
TR37133|c0_g4_i4	331	2.64922e-44	98	149.828	115461104	Os04g0661900	Oryza sativa Japonica Group	NA	proteasome-mediated ubiquitin-dependent protein catabolic process[GO:0043161]	NA	proteasome complex[GO:0000502] ; cytoplasmic, membrane-bounded vesicle[GO:0016023]	NA
TR37133|c0_g4_i1	486	2.42658e-42	97	146.747	115461104	Os04g0661900	Oryza sativa Japonica Group	NA	proteasome-mediated ubiquitin-dependent protein catabolic process[GO:0043161]	NA	proteasome complex[GO:0000502] ; cytoplasmic, membrane-bounded vesicle[GO:0016023]	NA
TR37133|c0_g2_i3	461	3.2546e-32	95	120.168	115461104	Os04g0661900	Oryza sativa Japonica Group	NA	proteasome-mediated ubiquitin-dependent protein catabolic process[GO:0043161]	NA	proteasome complex[GO:0000502] ; cytoplasmic, membrane-bounded vesicle[GO:0016023]	NA
TR27020|c0_g4_i1	348	5.40971e-28	88	105.531	115466010	Os06g0114500	Oryza sativa Japonica Group	NA	NA	NA	cytoplasmic, membrane-bounded vesicle[GO:0016023]	NA
TR34976|c0_g3_i1	656	5.28243e-12	52	69.707	115479223	Os09g0421700	Oryza sativa Japonica Group	NA	NA	binding[GO:0005488]	NA	NA
TR35827|c0_g1_i3	361	3.07824e-79	98	244.588	115499669	ACC synthase	Orobanche minor	NA	oxidation-reduction process[GO:0055114]	metal ion binding[GO:0046872] ; oxidoreductase activity[GO:0016491]	NA	NA
TR26837|c0_g1_i2	569	1.52543e-42	96	153.295	116048190	S-adenosyl-L-homocysteine hydrolase	Ligularia fischeri	NA	one-carbon metabolic process[GO:0006730]	adenosylhomocysteinase activity[GO:0004013]	NA	map00270:Cysteine and methionine metabolism(S-adenosylhomocysteine synthase[ec:3.3.1.1])
TR26837|c0_g1_i3	593	8.81865e-38	96	140.969	116048190	S-adenosyl-L-homocysteine hydrolase	Ligularia fischeri	NA	one-carbon metabolic process[GO:0006730]	adenosylhomocysteinase activity[GO:0004013]	NA	map00270:Cysteine and methionine metabolism(S-adenosylhomocysteine synthase[ec:3.3.1.1])
TR32468|c2_g1_i4	311	1.66413e-53	100	176.022	116782023	unknown	Picea sitchensis	NA	translation[GO:0006412]	structural constituent of ribosome[GO:0003735]	ribosome[GO:0005840]	NA
TR39149|c2_g3_i9	1021	0.000819509	65	47.3654	116787427	unknown	Picea sitchensis	NA	NA	NA	NA	NA
TR3319|c0_g6_i1	462	6.02685e-70	99	219.164	116791614	unknown	Picea sitchensis	NA	NA	NA	NA	NA
TR7831|c0_g3_i1	875	8.2838e-129	89	382.874	117067068	monodehydroascorbate reductase	Acanthus ebracteatus	NA	cell redox homeostasis[GO:0045454] ; oxidation-reduction process[GO:0055114]	flavin adenine dinucleotide binding[GO:0050660] ; oxidoreductase activity[GO:0016491]	cell[GO:0005623]	NA
TR7831|c0_g3_i3	505	4.28949e-49	90	172.17	117067068	monodehydroascorbate reductase	Acanthus ebracteatus	NA	cell redox homeostasis[GO:0045454] ; oxidation-reduction process[GO:0055114]	flavin adenine dinucleotide binding[GO:0050660] ; oxidoreductase activity[GO:0016491]	cell[GO:0005623]	NA
TR39963|c2_g7_i3	431	1.36989e-97	99	288.5	117296548	phosphoribulokinase	Acer grandidentatum	NA	carbohydrate metabolic process[GO:0005975] ; phosphorylation[GO:0016310]	phosphoribulokinase activity[GO:0008974] ; ATP binding[GO:0005524]	NA	map00710:Carbon fixation in photosynthetic organisms(phosphopentokinase[ec:2.7.1.19])
TR25589|c0_g1_i1	509	4.70277e-56	98	182.956	117607067	ubiquitin extension protein	Capsicum annuum	NA	translation[GO:0006412]	structural constituent of ribosome[GO:0003735]	ribosome[GO:0005840]	NA
TR36234|c0_g3_i2	767	4.26261e-108	95	320.087	118162023	CBS domain-containing protein	Solenostemon scutellarioides	NA	NA	NA	NA	NA
TR36234|c0_g3_i3	575	1.81849e-82	99	251.906	118162023	CBS domain-containing protein	Solenostemon scutellarioides	NA	NA	NA	NA	NA
TR36234|c0_g3_i4	302	5.8961e-60	92	190.66	118162023	CBS domain-containing protein	Solenostemon scutellarioides	NA	NA	NA	NA	NA
TR6931|c0_g1_i1	258	6.22152e-44	95	151.369	118481265	unknown	Populus trichocarpa	NA	NA	NA	NA	NA
TR44570|c0_g1_i3	365	1.04855e-40	97	144.436	118481265	unknown	Populus trichocarpa	NA	NA	NA	NA	NA
TR3062|c1_g1_i1	552	1.85316e-37	90	133.265	118481305	unknown	Populus trichocarpa	NA	NA	NA	NA	NA
TR43813|c2_g1_i2	235	1.08671e-33	95	118.627	118481551	unknown	Populus trichocarpa	NA	NA	NA	NA	NA
TR3699|c1_g2_i4	539	1.18516e-28	91	109.768	118481551	unknown	Populus trichocarpa	NA	NA	NA	NA	NA
TR7761|c1_g7_i4	532	1.06264e-42	100	146.747	118481639	unknown	Populus trichocarpa	NA	translation[GO:0006412]	structural constituent of ribosome[GO:0003735]	ribosome[GO:0005840]	NA
TR7761|c1_g7_i2	251	1.29362e-40	100	137.887	118481639	unknown	Populus trichocarpa	NA	translation[GO:0006412]	structural constituent of ribosome[GO:0003735]	ribosome[GO:0005840]	NA
TR7761|c1_g9_i1	406	4.42004e-17	100	77.7962	118482333	unknown	Populus trichocarpa	NA	translation[GO:0006412]	structural constituent of ribosome[GO:0003735]	ribosome[GO:0005840]	NA
TR3389|c0_g2_i1	330	1.66116e-30	88	118.627	118482999	unknown	Populus trichocarpa	NA	actin filament bundle assembly[GO:0051017]	actin filament binding[GO:0051015]	NA	NA
TR35088|c0_g4_i1	299	5.04072e-50	97	168.318	118483391	unknown	Populus trichocarpa	NA	translation[GO:0006412]	5S rRNA binding[GO:0008097] ; structural constituent of ribosome[GO:0003735]	ribosome[GO:0005840]	NA
TR41143|c1_g1_i3	230	7.30473e-39	90	132.88	118483575	unknown	Populus trichocarpa	NA	regulation of transcription from RNA polymerase II promoter[GO:0006357] ; transcription, DNA-templated[GO:0006351] ; regulation of cell cycle[GO:0051726] ; cell cycle[GO:0007049]	NA	NA	NA
TR3994|c0_g1_i2	839	4.51508e-75	96	233.802	118483618	unknown	Populus trichocarpa	NA	NA	NA	integral component of membrane[GO:0016021]	NA
TR3994|c0_g1_i8	731	5.59941e-55	95	165.236	118483618	unknown	Populus trichocarpa	NA	NA	NA	integral component of membrane[GO:0016021]	NA
TR3994|c0_g4_i5	366	2.91794e-38	100	133.65	118483618	unknown	Populus trichocarpa	NA	NA	NA	integral component of membrane[GO:0016021]	NA
TR25805|c0_g1_i2	395	4.5466e-88	98	268.085	118483777	unknown	Populus trichocarpa	NA	methionine biosynthetic process[GO:0009086] ; methylation[GO:0032259]	zinc ion binding[GO:0008270] ; 5-methyltetrahydropteroyltriglutamate-homocysteine S-methyltransferase activity[GO:0003871]	NA	map00450:Selenocompound metabolism(S-methyltransferase[ec:2.1.1.14]) ; map00270:Cysteine and methionine metabolism(S-methyltransferase[ec:2.1.1.14])
TR37293|c0_g3_i1	263	1.57111e-30	98	111.694	118483840	unknown	Populus trichocarpa	NA	metabolic process[GO:0008152]	NA	NA	NA
TR44441|c0_g1_i1	224	2.01706e-28	78	107.842	118483931	unknown	Populus trichocarpa	NA	NA	NA	NA	NA
TR41112|c3_g2_i1	628	2.97826e-108	90	326.25	118484667	unknown	Populus trichocarpa	NA	NA	NA	NA	NA
TR29997|c2_g2_i1	667	4.67417e-63	85	202.601	118485188	unknown	Populus trichocarpa	NA	translation[GO:0006412]	structural constituent of ribosome[GO:0003735]	ribosome[GO:0005840]	NA
TR7409|c0_g1_i4	378	1.67333e-59	100	189.504	118485188	unknown	Populus trichocarpa	NA	translation[GO:0006412]	structural constituent of ribosome[GO:0003735]	ribosome[GO:0005840]	NA
TR41182|c1_g2_i4	260	1.88339e-55	98	176.407	118485466	unknown	Populus trichocarpa	NA	NA	NA	NA	NA
TR41851|c0_g1_i8	535	2.83135e-69	94	217.238	118485517	unknown	Populus trichocarpa	NA	protein phosphorylation[GO:0006468]	protein kinase activity[GO:0004672] ; ATP binding[GO:0005524]	NA	NA
TR41851|c0_g1_i5	780	9.12587e-55	92	182.956	118485517	unknown	Populus trichocarpa	NA	protein phosphorylation[GO:0006468]	protein kinase activity[GO:0004672] ; ATP binding[GO:0005524]	NA	NA
TR43794|c0_g1_i1	1047	1.90613e-173	98	496.893	118485735	unknown	Populus trichocarpa	NA	biosynthetic process[GO:0009058]	NA	NA	NA
TR43794|c0_g1_i3	677	7.58991e-153	98	439.113	118485735	unknown	Populus trichocarpa	NA	biosynthetic process[GO:0009058]	NA	NA	NA
TR37092|c4_g1_i1	406	3.39132e-85	100	257.684	118486100	unknown	Populus trichocarpa	NA	microtubule-based process[GO:0007017] ; metabolic process[GO:0008152]	structural constituent of cytoskeleton[GO:0005200] ; GTP binding[GO:0005525] ; GTPase activity[GO:0003924]	microtubule[GO:0005874]	NA
TR38038|c0_g2_i3	240	1.4187e-36	90	131.724	118486195	unknown	Populus trichocarpa	NA	NA	NA	NA	NA
TR43700|c1_g9_i2	574	1.03141e-50	86	173.326	118486401	unknown	Populus trichocarpa	NA	NA	NA	NA	NA
TR32141|c0_g4_i1	282	4.70254e-42	97	144.436	118486839	unknown	Populus trichocarpa	NA	NA	NA	NA	NA
TR36875|c1_g5_i3	239	1.1716e-36	96	129.028	118488035	unknown	Populus trichocarpa	NA	photosystem II stabilization[GO:0042549] ; photosynthesis[GO:0015979]	calcium ion binding[GO:0005509]	photosystem II oxygen evolving complex[GO:0009654] ; extrinsic component of membrane[GO:0019898] ; integral component of membrane[GO:0016021]	NA
TR32100|c1_g3_i4	654	1.01296e-84	94	258.455	118488163	unknown	Populus trichocarpa	NA	cellulose biosynthetic process[GO:0030244]	cellulose synthase (UDP-forming) activity[GO:0016760]	integral component of membrane[GO:0016021]	map00500:Starch and sucrose metabolism(synthase (UDP-forming)[ec:2.4.1.12])
TR25805|c0_g1_i1	255	8.01853e-53	98	173.711	118488751	unknown	Populus trichocarpa	NA	methionine biosynthetic process[GO:0009086] ; methylation[GO:0032259]	zinc ion binding[GO:0008270] ; 5-methyltetrahydropteroyltriglutamate-homocysteine S-methyltransferase activity[GO:0003871]	NA	map00450:Selenocompound metabolism(S-methyltransferase[ec:2.1.1.14]) ; map00270:Cysteine and methionine metabolism(S-methyltransferase[ec:2.1.1.14])
TR8164|c0_g2_i5	560	9.4288e-105	96	309.686	118488840	unknown	Populus trichocarpa x Populus deltoides	NA	NA	NA	NA	NA
TR7360|c0_g1_i2	327	4.93593e-46	100	154.066	118489193	unknown	Populus trichocarpa x Populus deltoides	NA	NA	heat shock protein binding[GO:0031072] ; unfolded protein binding[GO:0051082]	integral component of membrane[GO:0016021]	NA
TR7360|c0_g1_i1	480	8.85388e-45	100	152.91	118489193	unknown	Populus trichocarpa x Populus deltoides	NA	NA	heat shock protein binding[GO:0031072] ; unfolded protein binding[GO:0051082]	integral component of membrane[GO:0016021]	NA
TR33021|c1_g2_i1	673	1.14468e-89	97	274.633	118489305	unknown	Populus trichocarpa x Populus deltoides	NA	protein phosphorylation[GO:0006468]	protein kinase activity[GO:0004672] ; ATP binding[GO:0005524]	NA	NA
TR732|c0_g1_i1	520	2.46921e-07	65	54.6842	118489607	unknown	Populus trichocarpa x Populus deltoides	NA	cellular metabolic process[GO:0044237]	NA	thylakoid[GO:0009579] ; membrane part[GO:0044425]	NA
TR37411|c0_g7_i3	1068	0	98	535.028	118723307	hydroxypyruvate reductase	Solenostemon scutellarioides	NA	oxidation-reduction process[GO:0055114]	NAD binding[GO:0051287] ; glycerate dehydrogenase activity[GO:0008465]	NA	map00260:Glycine, serine and threonine metabolism(dehydrogenase[ec:1.1.1.29]) ; map00630:Glyoxylate and dicarboxylate metabolism(dehydrogenase[ec:1.1.1.29]) ; map01130:Biosynthesis of antibiotics(dehydrogenase[ec:1.1.1.29]) ; map00680:Methane metabolism(dehydrogenase[ec:1.1.1.29])
TR37411|c0_g7_i2	719	7.54032e-157	98	450.284	118723307	hydroxypyruvate reductase	Solenostemon scutellarioides	NA	oxidation-reduction process[GO:0055114]	NAD binding[GO:0051287] ; glycerate dehydrogenase activity[GO:0008465]	NA	map00260:Glycine, serine and threonine metabolism(dehydrogenase[ec:1.1.1.29]) ; map00630:Glyoxylate and dicarboxylate metabolism(dehydrogenase[ec:1.1.1.29]) ; map01130:Biosynthesis of antibiotics(dehydrogenase[ec:1.1.1.29]) ; map00680:Methane metabolism(dehydrogenase[ec:1.1.1.29])
TR37411|c0_g7_i1	547	2.40824e-115	98	342.043	118723307	hydroxypyruvate reductase	Solenostemon scutellarioides	NA	oxidation-reduction process[GO:0055114]	NAD binding[GO:0051287] ; glycerate dehydrogenase activity[GO:0008465]	NA	map00260:Glycine, serine and threonine metabolism(dehydrogenase[ec:1.1.1.29]) ; map00630:Glyoxylate and dicarboxylate metabolism(dehydrogenase[ec:1.1.1.29]) ; map01130:Biosynthesis of antibiotics(dehydrogenase[ec:1.1.1.29]) ; map00680:Methane metabolism(dehydrogenase[ec:1.1.1.29])
TR37411|c0_g2_i1	284	1.29483e-46	100	161.384	118723307	hydroxypyruvate reductase	Solenostemon scutellarioides	NA	oxidation-reduction process[GO:0055114]	NAD binding[GO:0051287] ; glycerate dehydrogenase activity[GO:0008465]	NA	map00260:Glycine, serine and threonine metabolism(dehydrogenase[ec:1.1.1.29]) ; map00630:Glyoxylate and dicarboxylate metabolism(dehydrogenase[ec:1.1.1.29]) ; map01130:Biosynthesis of antibiotics(dehydrogenase[ec:1.1.1.29]) ; map00680:Methane metabolism(dehydrogenase[ec:1.1.1.29])
TR37411|c0_g4_i1	284	2.37566e-43	98	152.525	118723307	hydroxypyruvate reductase	Solenostemon scutellarioides	NA	oxidation-reduction process[GO:0055114]	NAD binding[GO:0051287] ; glycerate dehydrogenase activity[GO:0008465]	NA	map00260:Glycine, serine and threonine metabolism(dehydrogenase[ec:1.1.1.29]) ; map00630:Glyoxylate and dicarboxylate metabolism(dehydrogenase[ec:1.1.1.29]) ; map01130:Biosynthesis of antibiotics(dehydrogenase[ec:1.1.1.29]) ; map00680:Methane metabolism(dehydrogenase[ec:1.1.1.29])
TR3005|c0_g3_i1	288	1.20394e-37	86	135.191	119331578	DNA-binding protein	Catharanthus roseus	NA	regulation of transcription, DNA-templated[GO:0006355] ; transcription, DNA-templated[GO:0006351]	sequence-specific DNA binding[GO:0043565] ; transcription factor activity, sequence-specific DNA binding[GO:0003700]	nucleus[GO:0005634]	NA
TR30696|c0_g1_i2	777	1.77395e-136	93	394.045	119855475	chloroplast ribulose-1,5-bisphosphate carboxylase/oxygenase activase	Morus alba var. multicaulis	NA	NA	NA	NA	NA
TR39785|c0_g1_i4	232	1.0238e-13	94	71.633	119866037	Impa2	Nicotiana benthamiana	NA	protein import into nucleus[GO:0006606]	protein transporter activity[GO:0008565]	cytoplasm[GO:0005737] ; nucleus[GO:0005634]	NA
TR38235|c0_g1_i4	225	1.58362e-43	97	145.976	121483459	IAA3	Cestrum elegans	NA	auxin-activated signaling pathway[GO:0009734] ; regulation of transcription, DNA-templated[GO:0006355] ; transcription, DNA-templated[GO:0006351]	NA	nucleus[GO:0005634]	NA
TR34889|c0_g2_i13	421	1.66201e-14	71	72.7886	121483459	IAA3	Cestrum elegans	NA	NA	NA	NA	NA
TR35661|c0_g3_i2	772	5.57224e-118	100	350.903	122200954	CADH1_OCIBARecName: Full=Cinnamyl alcohol dehydrogenase 1; Short=CAD 1; Short=ObaCAD1	Ocimum basilicum	Lamiaceae	phenylpropanoid biosynthetic process[GO:0009699] ; oxidation-reduction process[GO:0055114]	cinnamyl-alcohol dehydrogenase activity[GO:0045551] ; zinc ion binding[GO:0008270] ; sinapyl alcohol dehydrogenase activity[GO:0052747]	NA	map00940:Phenylpropanoid biosynthesis(dehydrogenase[ec:1.1.1.195])
TR35661|c0_g6_i2	718	3.57601e-112	98	335.495	122200954	CADH1_OCIBARecName: Full=Cinnamyl alcohol dehydrogenase 1; Short=CAD 1; Short=ObaCAD1	Ocimum basilicum	Lamiaceae	phenylpropanoid biosynthetic process[GO:0009699] ; oxidation-reduction process[GO:0055114]	cinnamyl-alcohol dehydrogenase activity[GO:0045551] ; zinc ion binding[GO:0008270] ; sinapyl alcohol dehydrogenase activity[GO:0052747]	NA	map00940:Phenylpropanoid biosynthesis(dehydrogenase[ec:1.1.1.195])
TR35661|c0_g3_i4	514	4.53735e-66	100	214.542	122200954	CADH1_OCIBARecName: Full=Cinnamyl alcohol dehydrogenase 1; Short=CAD 1; Short=ObaCAD1	Ocimum basilicum	Lamiaceae	phenylpropanoid biosynthetic process[GO:0009699] ; oxidation-reduction process[GO:0055114]	cinnamyl-alcohol dehydrogenase activity[GO:0045551] ; zinc ion binding[GO:0008270] ; sinapyl alcohol dehydrogenase activity[GO:0052747]	NA	map00940:Phenylpropanoid biosynthesis(dehydrogenase[ec:1.1.1.195])
TR35661|c0_g1_i1	285	2.24746e-58	100	191.045	122200954	CADH1_OCIBARecName: Full=Cinnamyl alcohol dehydrogenase 1; Short=CAD 1; Short=ObaCAD1	Ocimum basilicum	Lamiaceae	phenylpropanoid biosynthetic process[GO:0009699] ; oxidation-reduction process[GO:0055114]	cinnamyl-alcohol dehydrogenase activity[GO:0045551] ; zinc ion binding[GO:0008270] ; sinapyl alcohol dehydrogenase activity[GO:0052747]	NA	map00940:Phenylpropanoid biosynthesis(dehydrogenase[ec:1.1.1.195])
TR35661|c0_g2_i1	317	1.20591e-52	100	176.792	122200954	CADH1_OCIBARecName: Full=Cinnamyl alcohol dehydrogenase 1; Short=CAD 1; Short=ObaCAD1	Ocimum basilicum	Lamiaceae	phenylpropanoid biosynthetic process[GO:0009699] ; oxidation-reduction process[GO:0055114]	cinnamyl-alcohol dehydrogenase activity[GO:0045551] ; zinc ion binding[GO:0008270] ; sinapyl alcohol dehydrogenase activity[GO:0052747]	NA	map00940:Phenylpropanoid biosynthesis(dehydrogenase[ec:1.1.1.195])
TR35832|c1_g1_i1	857	4.81298e-153	99	441.425	122200955	GEDH1_OCIBARecName: Full=Geraniol dehydrogenase 1; Short=ObaGEDH1	Ocimum basilicum	Lamiaceae	oxidation-reduction process[GO:0055114]	zinc ion binding[GO:0008270] ; geraniol dehydrogenase activity[GO:0047924]	NA	map01130:Biosynthesis of antibiotics(dehydrogenase (NADP+)[ec:1.1.1.183]) ; map00281:Geraniol degradation(dehydrogenase (NADP+)[ec:1.1.1.183])
TR35832|c1_g3_i2	659	3.18218e-95	100	291.197	122200955	GEDH1_OCIBARecName: Full=Geraniol dehydrogenase 1; Short=ObaGEDH1	Ocimum basilicum	Lamiaceae	oxidation-reduction process[GO:0055114]	zinc ion binding[GO:0008270] ; geraniol dehydrogenase activity[GO:0047924]	NA	map01130:Biosynthesis of antibiotics(dehydrogenase (NADP+)[ec:1.1.1.183]) ; map00281:Geraniol degradation(dehydrogenase (NADP+)[ec:1.1.1.183])
TR35832|c1_g2_i1	299	5.8024e-61	100	197.978	122200955	GEDH1_OCIBARecName: Full=Geraniol dehydrogenase 1; Short=ObaGEDH1	Ocimum basilicum	Lamiaceae	oxidation-reduction process[GO:0055114]	zinc ion binding[GO:0008270] ; geraniol dehydrogenase activity[GO:0047924]	NA	map01130:Biosynthesis of antibiotics(dehydrogenase (NADP+)[ec:1.1.1.183]) ; map00281:Geraniol degradation(dehydrogenase (NADP+)[ec:1.1.1.183])
TR35832|c1_g3_i4	377	3.32793e-51	100	174.096	122200955	GEDH1_OCIBARecName: Full=Geraniol dehydrogenase 1; Short=ObaGEDH1	Ocimum basilicum	Lamiaceae	oxidation-reduction process[GO:0055114]	zinc ion binding[GO:0008270] ; geraniol dehydrogenase activity[GO:0047924]	NA	map01130:Biosynthesis of antibiotics(dehydrogenase (NADP+)[ec:1.1.1.183]) ; map00281:Geraniol degradation(dehydrogenase (NADP+)[ec:1.1.1.183])
TR35832|c1_g3_i6	525	1.68401e-36	100	137.117	122200955	GEDH1_OCIBARecName: Full=Geraniol dehydrogenase 1; Short=ObaGEDH1	Ocimum basilicum	Lamiaceae	oxidation-reduction process[GO:0055114]	zinc ion binding[GO:0008270] ; geraniol dehydrogenase activity[GO:0047924]	NA	map01130:Biosynthesis of antibiotics(dehydrogenase (NADP+)[ec:1.1.1.183]) ; map00281:Geraniol degradation(dehydrogenase (NADP+)[ec:1.1.1.183])
TR32724|c1_g1_i3	1249	0	99	594.734	122237148	EGS1_OCIBARecName: Full=Eugenol synthase 1	Ocimum Basilicum	Lamiaceae	phenylpropanoid biosynthetic process[GO:0009699] ; oxidation-reduction process[GO:0055114]	oxidoreductase activity[GO:0016491]	NA	NA
TR32607|c0_g1_i1	2522	8.48773e-127	59	409.068	124359207	FAR1; Zinc finger, SWIM-type	Medicago truncatula	NA	NA	NA	NA	NA
TR32607|c0_g1_i2	1938	5.678e-107	60	344.354	124359207	FAR1; Zinc finger, SWIM-type	Medicago truncatula	NA	NA	NA	NA	NA
TR34083|c1_g1_i1	2201	5.27261e-27	55	124.02	124359207	FAR1; Zinc finger, SWIM-type	Medicago truncatula	NA	NA	NA	NA	NA
TR34083|c1_g1_i10	2092	1.16476e-26	57	122.479	124359207	FAR1; Zinc finger, SWIM-type	Medicago truncatula	NA	NA	NA	NA	NA
TR37152|c0_g2_i2	1242	9.15573e-05	57	47.7506	124360695	hypothetical protein MtrDRAFT_AC157893g45v2	Medicago truncatula	NA	NA	NA	NA	NA
TR37152|c0_g3_i7	1219	0.000483417	59	45.4394	124360695	hypothetical protein MtrDRAFT_AC157893g45v2	Medicago truncatula	NA	NA	NA	NA	NA
TR40179|c0_g1_i1	241	1.15751e-12	82	68.1662	124365251	beta-1,3-glucanase	Hevea brasiliensis	NA	carbohydrate metabolic process[GO:0005975]	hydrolase activity, hydrolyzing O-glycosyl compounds[GO:0004553]	NA	NA
TR42641|c0_g14_i2	446	5.51894e-99	100	294.664	125538363	hypothetical protein OsI_06126	Oryza sativa Indica Group	NA	metabolic process[GO:0008152] ; proton transport[GO:0015992] ; transmembrane transport[GO:0055085]	inorganic diphosphatase activity[GO:0004427] ; hydrogen-translocating pyrophosphatase activity[GO:0009678]	integral component of membrane[GO:0016021]	map00190:Oxidative phosphorylation(diphosphatase[ec:3.6.1.1])
TR42867|c0_g1_i2	332	1.45692e-54	97	176.022	125552843	hypothetical protein OsI_20464	Oryza sativa Indica Group	NA	NA	NA	NA	NA
TR30758|c1_g1_i3	567	4.32953e-05	48	49.2914	125555635	hypothetical protein OsI_23268	Oryza sativa Indica Group	NA	NA	NA	NA	NA
TR34622|c0_g2_i4	538	5.77469e-18	60	83.1889	125574314	hypothetical protein OsJ_31007	Oryza sativa Japonica Group	NA	NA	NA	NA	NA
TR7402|c0_g1_i1	258	9.43717e-31	98	118.627	125603909	hypothetical protein OsJ_27834	Oryza sativa Japonica Group	NA	protein folding[GO:0006457] ; response to stress[GO:0006950]	ATP binding[GO:0005524] ; unfolded protein binding[GO:0051082]	NA	NA
TR2782|c0_g2_i1	245	1.79867e-36	100	126.716	125634056	vacuolar ATPase subunit c	Cucumis sativus	NA	ATP hydrolysis coupled proton transport[GO:0015991]	hydrogen ion transmembrane transporter activity[GO:0015078]	proton-transporting V-type ATPase, V0 domain[GO:0033179] ; integral component of membrane[GO:0016021]	NA
TR42641|c0_g5_i1	259	4.33897e-54	98	173.711	125634058	vacuolar pyrophosphatase	Cucumis sativus	NA	metabolic process[GO:0008152] ; proton transport[GO:0015992] ; transmembrane transport[GO:0055085]	inorganic diphosphatase activity[GO:0004427] ; hydrogen-translocating pyrophosphatase activity[GO:0009678]	integral component of membrane[GO:0016021]	map00190:Oxidative phosphorylation(diphosphatase[ec:3.6.1.1])
TR31813|c3_g4_i6	308	7.41042e-68	98	207.608	125662829	beta-tubulin, partial	Spinacia oleracea	NA	microtubule-based process[GO:0007017] ; metabolic process[GO:0008152]	structural constituent of cytoskeleton[GO:0005200] ; GTP binding[GO:0005525] ; GTPase activity[GO:0003924]	microtubule[GO:0005874]	NA
TR31813|c3_g6_i1	249	6.64055e-56	100	176.407	125662829	beta-tubulin, partial	Spinacia oleracea	NA	microtubule-based process[GO:0007017] ; metabolic process[GO:0008152]	structural constituent of cytoskeleton[GO:0005200] ; GTP binding[GO:0005525] ; GTPase activity[GO:0003924]	microtubule[GO:0005874]	NA
TR31813|c3_g2_i1	248	4.3111e-54	100	171.785	125662829	beta-tubulin, partial	Spinacia oleracea	NA	microtubule-based process[GO:0007017] ; metabolic process[GO:0008152]	structural constituent of cytoskeleton[GO:0005200] ; GTP binding[GO:0005525] ; GTPase activity[GO:0003924]	microtubule[GO:0005874]	NA
TR32741|c1_g1_i6	859	1.02133e-50	67	177.948	125995291	embryonic element binding Factor 7	Daucus carota	NA	NA	NA	NA	NA
TR22792|c0_g1_i1	306	1.48107e-63	96	201.06	126506744	isopentyl pyrophosphate isomerase	Picrorhiza kurrooa	NA	isoprenoid biosynthetic process[GO:0008299]	hydrolase activity[GO:0016787] ; isopentenyl-diphosphate delta-isomerase activity[GO:0004452]	chloroplast[GO:0009507]	map01130:Biosynthesis of antibiotics(Delta-isomerase[ec:5.3.3.2]) ; map00900:Terpenoid backbone biosynthesis(Delta-isomerase[ec:5.3.3.2])
TR2611|c0_g1_i1	287	1.58994e-59	96	190.274	127464585	pectate lyase precursor	Glycine max	NA	pectin catabolic process[GO:0045490]	metal ion binding[GO:0046872] ; pectate lyase activity[GO:0030570]	NA	map00040:Pentose and glucuronate interconversions(lyase[ec:4.2.2.2])
TR2611|c1_g1_i7	261	5.92173e-56	97	180.644	127464585	pectate lyase precursor	Glycine max	NA	pectin catabolic process[GO:0045490]	metal ion binding[GO:0046872] ; pectate lyase activity[GO:0030570]	NA	map00040:Pentose and glucuronate interconversions(lyase[ec:4.2.2.2])
TR32504|c0_g1_i2	268	2.22636e-57	100	183.341	129281611	actin-1	Sinningia speciosa	NA	NA	NA	NA	NA
TR40907|c0_g2_i1	2043	0	85	676.396	129563703	ovule receptor-like kinase 28	Solanum chacoense	NA	protein phosphorylation[GO:0006468]	protein kinase activity[GO:0004672] ; ATP binding[GO:0005524]	integral component of membrane[GO:0016021]	NA
TR40046|c1_g3_i1	285	4.07207e-59	97	196.052	134284741	hydroxyphenylpyruvate dioxygenase	Salvia miltiorrhiza	NA	oxidation-reduction process[GO:0055114] ; aromatic amino acid family metabolic process[GO:0009072]	4-hydroxyphenylpyruvate dioxygenase activity[GO:0003868]	NA	map00130:Ubiquinone and other terpenoid-quinone biosynthesis(dioxygenase[ec:1.13.11.27]) ; map00350:Tyrosine metabolism(dioxygenase[ec:1.13.11.27]) ; map00360:Phenylalanine metabolism(dioxygenase[ec:1.13.11.27])
TR25849|c0_g1_i1	649	1.56612e-128	95	373.244	141447969	chloroplast ATP/ADP translocator	Pisum sativum	NA	ATP transport[GO:0015867] ; ADP transport[GO:0015866]	ATP:ADP antiporter activity[GO:0005471] ; ATP binding[GO:0005524]	integral component of membrane[GO:0016021]	NA
TR41674|c0_g4_i1	260	7.84415e-54	100	176.792	141447969	chloroplast ATP/ADP translocator	Pisum sativum	NA	ATP transport[GO:0015867] ; ADP transport[GO:0015866]	ATP:ADP antiporter activity[GO:0005471] ; ATP binding[GO:0005524]	integral component of membrane[GO:0016021]	NA
TR29828|c1_g1_i1	253	3.46813e-56	100	179.489	144228174	beta-tubulin	Sporobolus airoides	NA	microtubule-based process[GO:0007017] ; metabolic process[GO:0008152]	structural constituent of cytoskeleton[GO:0005200] ; GTP binding[GO:0005525] ; GTPase activity[GO:0003924]	microtubule[GO:0005874]	NA
TR40464|c2_g7_i1	239	4.85407e-39	98	137.502	144228180	beta-tubulin	Bouteloua eriopoda	NA	microtubule-based process[GO:0007017] ; metabolic process[GO:0008152]	structural constituent of cytoskeleton[GO:0005200] ; GTP binding[GO:0005525] ; GTPase activity[GO:0003924]	microtubule[GO:0005874]	NA
TR32517|c1_g3_i1	226	3.2802e-37	98	132.494	144228180	beta-tubulin	Bouteloua eriopoda	NA	microtubule-based process[GO:0007017] ; metabolic process[GO:0008152]	structural constituent of cytoskeleton[GO:0005200] ; GTP binding[GO:0005525] ; GTPase activity[GO:0003924]	microtubule[GO:0005874]	NA
TR2497|c0_g4_i1	370	8.1508e-14	91	69.707	144601655	lipid transfer protein 1	Salvia miltiorrhiza	NA	lipid transport[GO:0006869]	lipid binding[GO:0008289]	NA	NA
TR2497|c0_g3_i1	260	6.87618e-10	92	58.151	144601655	lipid transfer protein 1	Salvia miltiorrhiza	NA	lipid transport[GO:0006869]	lipid binding[GO:0008289]	NA	NA
TR2497|c0_g3_i3	289	3.17402e-48	91	157.532	144601657	lipid transfer protein 2	Salvia miltiorrhiza	NA	lipid transport[GO:0006869]	lipid binding[GO:0008289]	NA	NA
TR36609|c2_g2_i3	358	9.34163e-40	91	137.117	144601657	lipid transfer protein 2	Salvia miltiorrhiza	NA	lipid transport[GO:0006869]	lipid binding[GO:0008289]	NA	NA
TR2497|c0_g3_i6	224	7.92937e-36	90	125.176	144601657	lipid transfer protein 2	Salvia miltiorrhiza	NA	lipid transport[GO:0006869]	lipid binding[GO:0008289]	NA	NA
TR36609|c3_g4_i1	279	1.42107e-25	83	99.3673	144601657	lipid transfer protein 2	Salvia miltiorrhiza	NA	lipid transport[GO:0006869]	lipid binding[GO:0008289]	NA	NA
TR36609|c3_g2_i5	407	1.20225e-22	83	93.5893	144601657	lipid transfer protein 2	Salvia miltiorrhiza	NA	lipid transport[GO:0006869]	lipid binding[GO:0008289]	NA	NA
TR36008|c0_g1_i2	1313	0	93	619.772	145306611	flavanone 3-hydroxylase	Solenostemon scutellarioides	NA	oxidation-reduction process[GO:0055114]	metal ion binding[GO:0046872] ; oxidoreductase activity[GO:0016491]	NA	NA
TR36008|c0_g1_i4	515	1.25554e-105	92	315.849	145306611	flavanone 3-hydroxylase	Solenostemon scutellarioides	NA	oxidation-reduction process[GO:0055114]	metal ion binding[GO:0046872] ; oxidoreductase activity[GO:0016491]	NA	NA
TR36008|c0_g1_i1	407	7.38416e-58	92	191.815	145306611	flavanone 3-hydroxylase	Solenostemon scutellarioides	NA	oxidation-reduction process[GO:0055114]	metal ion binding[GO:0046872] ; oxidoreductase activity[GO:0016491]	NA	NA
TR36008|c0_g2_i1	335	1.69505e-32	91	124.02	145306611	flavanone 3-hydroxylase	Solenostemon scutellarioides	NA	oxidation-reduction process[GO:0055114]	metal ion binding[GO:0046872] ; oxidoreductase activity[GO:0016491]	NA	NA
TR36008|c0_g3_i1	330	5.27984e-17	87	80.8777	145306611	flavanone 3-hydroxylase	Solenostemon scutellarioides	NA	oxidation-reduction process[GO:0055114]	metal ion binding[GO:0046872] ; oxidoreductase activity[GO:0016491]	NA	NA
TR30932|c1_g1_i2	675	1.16992e-76	81	239.965	145306631	Myb transcription factor	Solenostemon scutellarioides	NA	NA	DNA binding[GO:0003677]	NA	NA
TR30932|c1_g2_i1	398	8.61015e-58	81	187.963	145306631	Myb transcription factor	Solenostemon scutellarioides	NA	NA	DNA binding[GO:0003677]	NA	NA
TR34760|c2_g4_i4	531	3.16389e-51	96	154.836	145306635	Myb transcription factor	Solenostemon scutellarioides	NA	NA	DNA binding[GO:0003677]	NA	NA
TR29216|c0_g5_i1	340	4.58616e-51	97	167.162	145334271	Histone H3.3	Arabidopsis thaliana	NA	NA	DNA binding[GO:0003677]	nucleus[GO:0005634]	NA
TR7032|c0_g1_i1	510	1.11585e-48	98	163.696	145334271	Histone H3.3	Arabidopsis thaliana	NA	NA	DNA binding[GO:0003677]	nucleus[GO:0005634]	NA
TR30848|c1_g3_i1	339	2.6504e-32	78	119.013	145334271	Histone H3.3	Arabidopsis thaliana	NA	NA	DNA binding[GO:0003677]	nucleus[GO:0005634]	NA
TR39908|c1_g3_i10	1498	5.18808e-10	66	63.5438	145408594	ORF82c	Pinus koraiensis	NA	NA	NA	NA	NA
TR31745|c0_g1_i1	1301	0	95	560.451	145581371	floricaula	Solenostemon scutellarioides	NA	regulation of transcription, DNA-templated[GO:0006355]	DNA binding[GO:0003677]	NA	NA
TR43084|c0_g2_i1	786	1.0401e-124	97	369.777	145843639	4-diphosphocytidyl-2-C-methyl-D-erythritol kinase	Salvia miltiorrhiza	NA	phosphorylation[GO:0016310] ; terpenoid biosynthetic process[GO:0016114]	4-(cytidine 5'-diphospho)-2-C-methyl-D-erythritol kinase activity[GO:0050515] ; ATP binding[GO:0005524]	NA	map01130:Biosynthesis of antibiotics(5'-diphospho)-2-C-methyl-D-erythritol kinase[ec:2.7.1.148]) ; map00900:Terpenoid backbone biosynthesis(5'-diphospho)-2-C-methyl-D-erythritol kinase[ec:2.7.1.148])
TR43084|c0_g5_i2	658	1.6577e-115	91	344.354	145843639	4-diphosphocytidyl-2-C-methyl-D-erythritol kinase	Salvia miltiorrhiza	NA	phosphorylation[GO:0016310] ; terpenoid biosynthetic process[GO:0016114]	4-(cytidine 5'-diphospho)-2-C-methyl-D-erythritol kinase activity[GO:0050515] ; ATP binding[GO:0005524]	NA	map01130:Biosynthesis of antibiotics(5'-diphospho)-2-C-methyl-D-erythritol kinase[ec:2.7.1.148]) ; map00900:Terpenoid backbone biosynthesis(5'-diphospho)-2-C-methyl-D-erythritol kinase[ec:2.7.1.148])
TR43084|c0_g5_i4	379	7.39093e-68	99	218.009	145843639	4-diphosphocytidyl-2-C-methyl-D-erythritol kinase	Salvia miltiorrhiza	NA	phosphorylation[GO:0016310] ; terpenoid biosynthetic process[GO:0016114]	4-(cytidine 5'-diphospho)-2-C-methyl-D-erythritol kinase activity[GO:0050515] ; ATP binding[GO:0005524]	NA	map01130:Biosynthesis of antibiotics(5'-diphospho)-2-C-methyl-D-erythritol kinase[ec:2.7.1.148]) ; map00900:Terpenoid backbone biosynthesis(5'-diphospho)-2-C-methyl-D-erythritol kinase[ec:2.7.1.148])
TR43084|c0_g4_i1	293	5.23148e-52	93	175.637	145843639	4-diphosphocytidyl-2-C-methyl-D-erythritol kinase	Salvia miltiorrhiza	NA	phosphorylation[GO:0016310] ; terpenoid biosynthetic process[GO:0016114]	4-(cytidine 5'-diphospho)-2-C-methyl-D-erythritol kinase activity[GO:0050515] ; ATP binding[GO:0005524]	NA	map01130:Biosynthesis of antibiotics(5'-diphospho)-2-C-methyl-D-erythritol kinase[ec:2.7.1.148]) ; map00900:Terpenoid backbone biosynthesis(5'-diphospho)-2-C-methyl-D-erythritol kinase[ec:2.7.1.148])
TR27589|c0_g1_i2	542	3.67286e-07	92	51.9878	147765296	hypothetical protein VITISV_034841	Vitis vinifera	NA	cell proliferation[GO:0008283]	growth factor activity[GO:0008083]	extracellular region[GO:0005576]	NA
TR2462|c0_g2_i1	280	2.59503e-28	96	107.842	147766282	hypothetical protein VITISV_012710	Vitis vinifera	NA	multicellular organismal development[GO:0007275]	NA	NA	NA
TR39940|c0_g2_i4	246	8.71022e-19	95	85.1149	147766689	hypothetical protein VITISV_003292	Vitis vinifera	NA	NA	NA	NA	NA
TR38095|c0_g4_i3	790	1.21485e-137	84	406.371	147767466	hypothetical protein VITISV_041185	Vitis vinifera	NA	NA	NA	NA	NA
TR7425|c1_g1_i4	354	3.4458e-05	68	48.1358	147767603	hypothetical protein VITISV_003164	Vitis vinifera	NA	NA	NA	NA	NA
TR25636|c0_g1_i10	517	1.83233e-73	98	202.216	147768838	hypothetical protein VITISV_023640	Vitis vinifera	NA	thiamine metabolic process[GO:0006772] ; mismatch repair[GO:0006298] ; thiamine diphosphate biosynthetic process[GO:0009229]	mismatched DNA binding[GO:0030983] ; thiamine binding[GO:0030975] ; ATP binding[GO:0005524] ; thiamine diphosphokinase activity[GO:0004788]	NA	map00730:Thiamine metabolism(diphosphokinase[ec:2.7.6.2])
TR34290|c0_g1_i1	1229	7.10958e-07	47	53.1434	147768838	hypothetical protein VITISV_023640	Vitis vinifera	NA	NA	NA	NA	NA
TR43453|c2_g2_i5	460	6.68774e-12	85	65.4698	147769456	hypothetical protein VITISV_002570	Vitis vinifera	NA	regulation of transcription, DNA-templated[GO:0006355]	transcription factor activity, sequence-specific DNA binding[GO:0003700]	nucleus[GO:0005634]	NA
TR38063|c2_g4_i1	252	4.68605e-53	100	172.555	147769563	hypothetical protein VITISV_019292	Vitis vinifera	NA	protein phosphorylation[GO:0006468]	protein kinase activity[GO:0004672] ; ATP binding[GO:0005524]	NA	NA
TR41932|c0_g1_i1	889	0	95	538.88	147771543	hypothetical protein VITISV_038658	Vitis vinifera	NA	potassium ion transmembrane transport[GO:0071805]	potassium ion transmembrane transporter activity[GO:0015079]	integral component of membrane[GO:0016021]	NA
TR35205|c0_g1_i5	401	4.7042e-89	100	266.159	147771777	hypothetical protein VITISV_039549	Vitis vinifera	NA	NA	NA	integral component of membrane[GO:0016021]	NA
TR7780|c0_g6_i1	235	3.83899e-14	77	68.9366	147772422	hypothetical protein VITISV_028026	Vitis vinifera	NA	NA	NA	membrane[GO:0016020]	NA
TR37487|c0_g4_i3	446	9.41094e-44	78	152.14	147773414	hypothetical protein VITISV_029394	Vitis vinifera	NA	NA	NA	NA	NA
TR42323|c1_g4_i2	243	6.88104e-43	93	147.132	147773657	hypothetical protein VITISV_029948	Vitis vinifera	NA	NA	NA	NA	NA
TR24802|c0_g1_i3	432	1.02839e-39	95	141.739	147773693	hypothetical protein VITISV_018744	Vitis vinifera	NA	protein phosphorylation[GO:0006468]	protein kinase activity[GO:0004672] ; ATP binding[GO:0005524]	NA	NA
TR21473|c0_g1_i1	810	1.4371e-06	58	55.4546	147774154	hypothetical protein VITISV_038204	Vitis vinifera	NA	NA	NA	NA	NA
TR6949|c0_g1_i1	3906	0	62	1013.45	147774273	hypothetical protein VITISV_026680	Vitis vinifera	NA	NA	NA	NA	NA
TR6598|c0_g1_i1	4872	0	64	322.013	147774273	hypothetical protein VITISV_026680	Vitis vinifera	NA	NA	NA	NA	NA
TR40454|c0_g3_i4	801	2.64851e-78	91	248.054	147774596	hypothetical protein VITISV_021634	Vitis vinifera	NA	protein dephosphorylation[GO:0006470]	protein serine/threonine phosphatase activity[GO:0004722]	NA	NA
TR31850|c0_g2_i1	419	1.53081e-34	94	129.798	147774596	hypothetical protein VITISV_021634	Vitis vinifera	NA	protein dephosphorylation[GO:0006470]	protein serine/threonine phosphatase activity[GO:0004722]	NA	NA
TR31850|c0_g2_i2	551	6.59106e-34	94	129.798	147774596	hypothetical protein VITISV_021634	Vitis vinifera	NA	protein dephosphorylation[GO:0006470]	protein serine/threonine phosphatase activity[GO:0004722]	NA	NA
TR48564|c0_g1_i1	1344	1.26447e-15	56	75.8702	147774729	hypothetical protein VITISV_006540	Vitis vinifera	NA	NA	NA	NA	NA
TR40877|c0_g5_i1	434	6.48463e-05	59	47.3654	147775061	hypothetical protein VITISV_014783	Vitis vinifera	NA	NA	NA	NA	NA
TR41833|c0_g3_i6	1749	1.11284e-96	63	312.768	147775992	hypothetical protein VITISV_024964	Vitis vinifera	NA	NA	NA	NA	NA
TR41833|c0_g3_i1	1986	1.45305e-84	61	223.787	147775992	hypothetical protein VITISV_024964	Vitis vinifera	NA	NA	NA	NA	NA
TR43229|c1_g1_i2	1161	7.78477e-77	64	254.603	147775992	hypothetical protein VITISV_024964	Vitis vinifera	NA	NA	NA	NA	NA
TR4006|c0_g1_i3	703	4.66851e-39	54	151.369	147776306	hypothetical protein VITISV_016007	Vitis vinifera	NA	NA	NA	NA	NA
TR44738|c6_g3_i3	301	6.64574e-29	74	117.087	147776333	hypothetical protein VITISV_000078	Vitis vinifera	NA	NA	NA	membrane[GO:0016020]	NA
TR33607|c0_g3_i2	461	1.83393e-65	93	206.453	147777182	hypothetical protein VITISV_017507	Vitis vinifera	NA	NA	NA	NA	NA
TR33607|c0_g6_i1	246	8.5405e-45	95	150.599	147777182	hypothetical protein VITISV_017507	Vitis vinifera	NA	NA	NA	NA	NA
TR33607|c0_g3_i3	314	4.43925e-32	92	118.627	147777182	hypothetical protein VITISV_017507	Vitis vinifera	NA	NA	NA	NA	NA
TR3891|c0_g2_i1	467	3.89169e-17	96	82.4185	147777193	hypothetical protein VITISV_017099	Vitis vinifera	NA	NA	zinc ion binding[GO:0008270]	integral component of membrane[GO:0016021]	NA
TR21481|c0_g1_i2	483	1.978e-16	100	80.8777	147777245	hypothetical protein VITISV_019023	Vitis vinifera	NA	protein ubiquitination[GO:0016567]	ligase activity[GO:0016874] ; ubiquitin-protein transferase activity[GO:0004842]	NA	NA
TR38778|c0_g1_i4	486	3.54142e-63	96	215.312	147777287	hypothetical protein VITISV_009158	Vitis vinifera	NA	protein phosphorylation[GO:0006468]	protein kinase activity[GO:0004672] ; ATP binding[GO:0005524]	integral component of membrane[GO:0016021]	NA
TR39869|c3_g4_i1	2608	3.29321e-74	65	182.57	147778480	hypothetical protein VITISV_024659	Vitis vinifera	NA	NA	binding[GO:0005488]	NA	NA
TR38526|c0_g2_i13	260	6.63603e-35	92	127.102	147779400	hypothetical protein VITISV_030117	Vitis vinifera	NA	NA	NA	NA	NA
TR34290|c0_g1_i2	1139	7.88951e-07	48	51.6026	147779626	hypothetical protein VITISV_044429	Vitis vinifera	NA	NA	NA	NA	NA
TR29659|c0_g1_i1	669	1.98664e-51	76	182.185	147779800	hypothetical protein VITISV_002247	Vitis vinifera	NA	NA	NA	NA	NA
TR36880|c0_g1_i5	2611	0	58	586.645	147780188	hypothetical protein VITISV_001347	Vitis vinifera	NA	NA	NA	NA	NA
TR28659|c1_g1_i1	328	1.10331e-25	88	103.219	147780605	hypothetical protein VITISV_031837	Vitis vinifera	NA	glutathione metabolic process[GO:0006749]	glutathione transferase activity[GO:0004364]	cytoplasm[GO:0005737]	map00480:Glutathione metabolism(transferase[ec:2.5.1.18]) ; map00982:Drug metabolism - cytochrome P450(transferase[ec:2.5.1.18]) ; map00980:Metabolism of xenobiotics by cytochrome P450(transferase[ec:2.5.1.18])
TR34259|c2_g2_i4	475	6.67906e-38	95	139.043	147781802	hypothetical protein VITISV_011421	Vitis vinifera	NA	NA	NA	NA	NA
TR35072|c0_g2_i9	1179	6.87156e-130	77	299.286	147782883	hypothetical protein VITISV_020704	Vitis vinifera	NA	NA	binding[GO:0005488]	NA	NA
TR8012|c0_g1_i11	2343	3.98567e-167	57	529.25	147783806	hypothetical protein VITISV_024648	Vitis vinifera	NA	NA	NA	NA	NA
TR15791|c0_g1_i2	1973	4.78442e-91	54	315.849	147783806	hypothetical protein VITISV_024648	Vitis vinifera	NA	NA	NA	NA	NA
TR32974|c0_g2_i1	2082	3.5611e-79	62	283.108	147783806	hypothetical protein VITISV_024648	Vitis vinifera	NA	NA	NA	NA	NA
TR8012|c0_g1_i12	1394	2.39244e-62	54	227.639	147783806	hypothetical protein VITISV_024648	Vitis vinifera	NA	NA	NA	NA	NA
TR7297|c0_g1_i1	1585	1.12538e-57	50	168.318	147783806	hypothetical protein VITISV_024648	Vitis vinifera	NA	NA	NA	NA	NA
TR11409|c0_g1_i1	1554	2.5569e-81	61	285.804	147784422	hypothetical protein VITISV_030567	Vitis vinifera	NA	NA	NA	NA	NA
TR30277|c0_g3_i2	1933	1.46329e-62	52	162.54	147784422	hypothetical protein VITISV_030567	Vitis vinifera	NA	NA	NA	NA	NA
TR30277|c0_g3_i1	1781	5.92972e-52	44	201.445	147784422	hypothetical protein VITISV_030567	Vitis vinifera	NA	NA	NA	NA	NA
TR7297|c0_g1_i4	1394	8.62097e-52	54	197.593	147784422	hypothetical protein VITISV_030567	Vitis vinifera	NA	NA	NA	NA	NA
TR30277|c0_g3_i5	903	3.88183e-28	48	122.479	147784422	hypothetical protein VITISV_030567	Vitis vinifera	NA	NA	NA	NA	NA
TR43117|c2_g4_i1	252	1.44437e-34	91	130.183	147784436	hypothetical protein VITISV_032250	Vitis vinifera	NA	phosphatidylinositol phosphorylation[GO:0046854]	phosphatidylinositol phosphate kinase activity[GO:0016307]	NA	NA
TR42964|c1_g4_i5	320	1.92729e-52	99	175.252	147785330	hypothetical protein VITISV_013941	Vitis vinifera	NA	NA	NA	NA	NA
TR41811|c1_g2_i1	669	9.28048e-52	98	176.407	147787193	hypothetical protein VITISV_030895	Vitis vinifera	NA	heme biosynthetic process[GO:0006783]	ferrochelatase activity[GO:0004325]	NA	map00860:Porphyrin and chlorophyll metabolism(ferro-protoporphyrin chelatase[ec:4.99.1.1])
TR44371|c1_g1_i10	4854	0	75	1225.69	147788024	hypothetical protein VITISV_032634	Vitis vinifera	NA	NA	metal ion binding[GO:0046872]	NA	NA
TR8297|c2_g4_i3	1474	6.69076e-89	58	186.808	147789000	hypothetical protein VITISV_009615	Vitis vinifera	NA	NA	NA	NA	NA
TR41835|c0_g6_i3	374	3.96086e-66	96	209.92	147789460	hypothetical protein VITISV_043442	Vitis vinifera	NA	NA	NA	NA	NA
TR41835|c0_g4_i4	566	3.75128e-62	97	202.601	147789460	hypothetical protein VITISV_043442	Vitis vinifera	NA	NA	NA	NA	NA
TR22195|c1_g1_i1	2051	0	68	564.688	147789747	hypothetical protein VITISV_025614	Vitis vinifera	NA	NA	NA	NA	NA
TR21765|c0_g1_i1	313	3.00365e-62	97	206.838	147790064	hypothetical protein VITISV_012191	Vitis vinifera	NA	NA	ATP binding[GO:0005524]	NA	NA
TR13743|c0_g1_i1	1398	3.06951e-61	54	224.557	147790209	hypothetical protein VITISV_012106	Vitis vinifera	NA	NA	NA	NA	NA
TR34622|c0_g2_i5	1619	8.71803e-52	55	158.688	147790209	hypothetical protein VITISV_012106	Vitis vinifera	NA	NA	NA	NA	NA
TR8012|c0_g1_i7	1531	2.96248e-42	55	169.474	147790209	hypothetical protein VITISV_012106	Vitis vinifera	NA	NA	NA	NA	NA
TR32477|c0_g2_i1	608	8.00133e-52	92	137.887	147791290	hypothetical protein VITISV_042270	Vitis vinifera	NA	NA	NA	integral component of membrane[GO:0016021]	NA
TR30466|c1_g2_i4	405	7.77049e-23	83	95.1301	147791360	hypothetical protein VITISV_008125	Vitis vinifera	NA	NA	NA	NA	NA
TR44583|c1_g2_i3	453	1.21543e-67	95	216.468	147792265	hypothetical protein VITISV_023081	Vitis vinifera	NA	protein phosphorylation[GO:0006468]	protein kinase activity[GO:0004672] ; ATP binding[GO:0005524]	NA	NA
TR35416|c1_g1_i2	683	1.48871e-110	92	340.117	147794019	hypothetical protein VITISV_018380	Vitis vinifera	NA	microtubule-based movement[GO:0007018] ; metabolic process[GO:0008152]	microtubule binding[GO:0008017] ; ATP binding[GO:0005524] ; microtubule motor activity[GO:0003777]	kinesin complex[GO:0005871] ; microtubule[GO:0005874]	NA
TR40440|c1_g6_i2	247	2.46161e-30	89	117.857	147794489	hypothetical protein VITISV_007074	Vitis vinifera	NA	NA	RNA binding[GO:0003723]	NA	NA
TR36274|c1_g1_i4	960	2.34336e-58	78	131.724	147794682	hypothetical protein VITISV_031870	Vitis vinifera	NA	NA	binding[GO:0005488]	NA	NA
TR38229|c0_g1_i4	1386	2.73882e-100	67	330.487	147796443	hypothetical protein VITISV_034590	Vitis vinifera	NA	NA	NA	NA	NA
TR12035|c0_g2_i1	1546	1.37488e-95	70	319.701	147796443	hypothetical protein VITISV_034590	Vitis vinifera	NA	NA	NA	NA	NA
TR38229|c0_g1_i3	911	1.62814e-37	56	149.443	147796443	hypothetical protein VITISV_034590	Vitis vinifera	NA	NA	NA	NA	NA
TR38229|c0_g1_i2	386	5.52706e-25	75	106.686	147796443	hypothetical protein VITISV_034590	Vitis vinifera	NA	NA	binding[GO:0005488]	NA	NA
TR24086|c0_g1_i1	350	5.75446e-17	88	77.7962	147797923	hypothetical protein VITISV_042554	Vitis vinifera	NA	NA	NA	NA	NA
TR29743|c0_g1_i3	437	1.00762e-59	94	189.504	147798153	hypothetical protein VITISV_024928	Vitis vinifera	NA	NA	NA	NA	NA
TR43165|c1_g2_i2	3518	0	63	692.575	147798869	hypothetical protein VITISV_003191	Vitis vinifera	NA	NA	NA	NA	NA
TR36201|c0_g1_i2	2393	1.26194e-153	59	489.189	147798869	hypothetical protein VITISV_003191	Vitis vinifera	NA	NA	NA	NA	NA
TR9163|c0_g2_i1	504	1.00434e-48	78	176.792	147798869	hypothetical protein VITISV_003191	Vitis vinifera	NA	NA	binding[GO:0005488]	NA	NA
TR8038|c1_g2_i1	759	1.08797e-112	92	342.428	147798963	hypothetical protein VITISV_002904	Vitis vinifera	NA	NA	ATP binding[GO:0005524]	NA	NA
TR32920|c1_g1_i4	349	9.02376e-58	93	183.341	147798986	hypothetical protein VITISV_008455	Vitis vinifera	NA	NA	heme binding[GO:0020037] ; electron carrier activity[GO:0009055]	NA	NA
TR32920|c1_g3_i1	367	1.61824e-42	95	144.436	147798986	hypothetical protein VITISV_008455	Vitis vinifera	NA	NA	heme binding[GO:0020037] ; electron carrier activity[GO:0009055]	NA	NA
TR34679|c1_g3_i1	988	1.39523e-30	68	127.102	147799995	hypothetical protein VITISV_002761	Vitis vinifera	NA	NA	NA	NA	NA
TR39912|c0_g2_i1	305	3.65083e-60	99	199.519	147801232	hypothetical protein VITISV_009507	Vitis vinifera	NA	metabolic process[GO:0008152]	nucleic acid binding[GO:0003676] ; ATP binding[GO:0005524] ; helicase activity[GO:0004386]	NA	NA
TR37995|c3_g3_i2	372	3.72723e-05	61	48.1358	147802190	hypothetical protein VITISV_021658	Vitis vinifera	NA	NA	NA	NA	NA
TR42229|c0_g1_i1	315	2.1822e-61	98	203.756	147802455	hypothetical protein VITISV_039695	Vitis vinifera	NA	sulfate transmembrane transport[GO:1902358]	secondary active sulfate transmembrane transporter activity[GO:0008271]	integral component of membrane[GO:0016021] ; chloroplast[GO:0009507]	NA
TR44846|c2_g1_i4	6009	0	78	1678.69	147804664	hypothetical protein VITISV_011340	Vitis vinifera	NA	NA	metal ion binding[GO:0046872]	NA	NA
TR44846|c2_g1_i2	1994	2.16568e-92	69	319.701	147804664	hypothetical protein VITISV_011340	Vitis vinifera	NA	NA	binding[GO:0005488]	NA	NA
TR32615|c1_g1_i10	2543	1.07017e-55	58	216.083	147804937	hypothetical protein VITISV_001215	Vitis vinifera	NA	NA	NA	NA	NA
TR31951|c0_g3_i1	303	7.70921e-41	85	145.206	147805693	hypothetical protein VITISV_012676	Vitis vinifera	NA	metabolic process[GO:0008152]	coenzyme binding[GO:0050662] ; catalytic activity[GO:0003824]	NA	NA
TR27353|c0_g1_i1	1863	2.96696e-106	55	220.32	147805915	hypothetical protein VITISV_010420	Vitis vinifera	NA	NA	NA	NA	NA
TR41176|c1_g3_i13	4768	0	49	619.002	147806117	hypothetical protein VITISV_040650	Vitis vinifera	NA	NA	NA	NA	NA
TR37399|c1_g1_i1	1003	5.91614e-28	46	93.9745	147809827	hypothetical protein VITISV_035279	Vitis vinifera	NA	NA	NA	NA	NA
TR30831|c2_g1_i19	818	8.75588e-19	60	91.6633	147811281	hypothetical protein VITISV_010115	Vitis vinifera	NA	NA	NA	NA	NA
TR41656|c0_g4_i6	467	4.68663e-45	67	161.384	147812640	hypothetical protein VITISV_043447	Vitis vinifera	NA	NA	NA	NA	NA
TR31643|c0_g1_i5	587	7.2545e-72	80	229.565	147815394	hypothetical protein VITISV_003761	Vitis vinifera	NA	metabolic process[GO:0008152]	coenzyme binding[GO:0050662] ; catalytic activity[GO:0003824]	NA	NA
TR37014|c0_g3_i1	569	3.81473e-52	98	184.111	147815751	hypothetical protein VITISV_025883	Vitis vinifera	NA	protein phosphorylation[GO:0006468]	ATP binding[GO:0005524] ; protein serine/threonine kinase activity[GO:0004674]	integral component of membrane[GO:0016021]	NA
TR40655|c0_g2_i4	351	1.90276e-12	94	65.855	147815760	hypothetical protein VITISV_037248	Vitis vinifera	NA	NA	NA	NA	NA
TR40655|c0_g2_i2	432	3.45675e-12	94	65.855	147815760	hypothetical protein VITISV_037248	Vitis vinifera	NA	NA	NA	NA	NA
TR41436|c1_g1_i3	448	3.64568e-42	87	156.377	147815878	hypothetical protein VITISV_035294	Vitis vinifera	NA	NA	RNA binding[GO:0003723]	NA	NA
TR13743|c0_g1_i3	1308	1.55152e-50	49	192.586	147816383	hypothetical protein VITISV_037543	Vitis vinifera	NA	NA	NA	NA	NA
TR42364|c0_g2_i3	608	5.42826e-39	86	139.813	147818291	hypothetical protein VITISV_037103	Vitis vinifera	NA	NA	NA	NA	NA
TR43759|c0_g3_i1	564	5.22243e-58	96	201.83	147818353	hypothetical protein VITISV_033508	Vitis vinifera	NA	metabolic process[GO:0008152]	nucleic acid binding[GO:0003676] ; ATP binding[GO:0005524] ; helicase activity[GO:0004386]	NA	NA
TR43759|c0_g3_i2	322	1.30697e-57	100	196.823	147818353	hypothetical protein VITISV_033508	Vitis vinifera	NA	metabolic process[GO:0008152]	nucleic acid binding[GO:0003676] ; ATP binding[GO:0005524] ; helicase activity[GO:0004386]	NA	NA
TR4006|c0_g1_i2	784	9.43013e-47	56	163.696	147818673	hypothetical protein VITISV_041509	Vitis vinifera	NA	NA	NA	NA	NA
TR37582|c0_g2_i2	518	4.16672e-44	97	149.828	147818759	hypothetical protein VITISV_008691	Vitis vinifera	NA	NA	NA	NA	NA
TR9163|c0_g1_i1	942	3.66887e-47	84	162.925	147819992	hypothetical protein VITISV_035871	Vitis vinifera	NA	NA	NA	NA	NA
TR33468|c0_g1_i1	743	8.90145e-94	94	285.034	147820053	hypothetical protein VITISV_002168	Vitis vinifera	NA	protein folding[GO:0006457] ; protein peptidyl-prolyl isomerization[GO:0000413]	peptidyl-prolyl cis-trans isomerase activity[GO:0003755]	NA	NA
TR33468|c0_g2_i3	299	7.37296e-49	93	164.081	147820053	hypothetical protein VITISV_002168	Vitis vinifera	NA	protein folding[GO:0006457] ; protein peptidyl-prolyl isomerization[GO:0000413]	peptidyl-prolyl cis-trans isomerase activity[GO:0003755]	NA	NA
TR44686|c4_g3_i1	272	7.63478e-05	63	43.8986	147820108	hypothetical protein VITISV_004971	Vitis vinifera	NA	NA	NA	NA	NA
TR41023|c0_g1_i4	531	5.3783e-35	67	134.806	147820358	hypothetical protein VITISV_025999	Vitis vinifera	NA	NA	NA	NA	NA
TR38430|c1_g3_i6	305	0.0003654	57	44.2838	147822043	hypothetical protein VITISV_028268	Vitis vinifera	NA	NA	NA	NA	NA
TR39229|c0_g3_i1	248	3.15031e-48	98	160.229	147822061	hypothetical protein VITISV_021805	Vitis vinifera	NA	protein phosphorylation[GO:0006468] ; cellulose biosynthetic process[GO:0030244]	protein kinase activity[GO:0004672] ; ATP binding[GO:0005524]	NA	NA
TR32077|c0_g5_i2	447	1.40128e-44	100	151.369	147826736	hypothetical protein VITISV_010022	Vitis vinifera	NA	NA	protein heterodimerization activity[GO:0046982] ; DNA binding[GO:0003677]	nucleosome[GO:0000786] ; nucleus[GO:0005634]	NA
TR30848|c1_g1_i1	389	1.5649e-43	100	147.902	147826736	hypothetical protein VITISV_010022	Vitis vinifera	NA	NA	protein heterodimerization activity[GO:0046982] ; DNA binding[GO:0003677]	nucleosome[GO:0000786] ; nucleus[GO:0005634]	NA
TR4006|c0_g1_i1	643	2.17681e-55	75	194.897	147826995	hypothetical protein VITISV_021887	Vitis vinifera	NA	NA	NA	NA	NA
TR43027|c5_g1_i2	643	6.28013e-73	88	240.736	147828306	hypothetical protein VITISV_015390	Vitis vinifera	NA	NA	calcium ion binding[GO:0005509]	NA	NA
TR27175|c0_g1_i1	546	1.53249e-54	88	190.274	147828306	hypothetical protein VITISV_015390	Vitis vinifera	NA	NA	calcium ion binding[GO:0005509]	NA	NA
TR8236|c2_g7_i1	247	8.84989e-38	92	138.658	147834735	hypothetical protein VITISV_033633	Vitis vinifera	NA	protein phosphorylation[GO:0006468]	protein kinase activity[GO:0004672] ; ATP binding[GO:0005524]	integral component of membrane[GO:0016021]	NA
TR38073|c1_g2_i1	449	1.46507e-37	81	140.584	147837626	hypothetical protein VITISV_038240	Vitis vinifera	NA	fatty acid biosynthetic process[GO:0006633]	transferase activity, transferring acyl groups other than amino-acyl groups[GO:0016747]	integral component of membrane[GO:0016021]	NA
TR38073|c1_g2_i4	552	4.66089e-21	79	95.9005	147837626	hypothetical protein VITISV_038240	Vitis vinifera	NA	fatty acid biosynthetic process[GO:0006633]	transferase activity, transferring acyl groups other than amino-acyl groups[GO:0016747]	integral component of membrane[GO:0016021]	NA
TR43700|c1_g2_i1	284	1.22146e-50	93	176.407	147838527	hypothetical protein VITISV_009872	Vitis vinifera	NA	NA	NA	NA	NA
TR3076|c0_g1_i1	501	1.24152e-106	96	318.546	147839415	hypothetical protein VITISV_026975	Vitis vinifera	NA	glycolytic process[GO:0006096]	potassium ion binding[GO:0030955] ; pyruvate kinase activity[GO:0004743] ; magnesium ion binding[GO:0000287] ; kinase activity[GO:0016301]	NA	map01130:Biosynthesis of antibiotics(kinase[ec:2.7.1.40]) ; map00620:Pyruvate metabolism(kinase[ec:2.7.1.40]) ; map00010:Glycolysis / Gluconeogenesis(kinase[ec:2.7.1.40]) ; map00230:Purine metabolism(kinase[ec:2.7.1.40])
TR40011|c0_g3_i2	346	3.15375e-34	92	126.331	147839834	hypothetical protein VITISV_039338	Vitis vinifera	NA	NA	NA	membrane[GO:0016020]	NA
TR38596|c0_g3_i1	550	5.65535e-83	99	260.381	147841252	hypothetical protein VITISV_023819	Vitis vinifera	NA	cation transmembrane transport[GO:0098655]	cation transmembrane transporter activity[GO:0008324]	integral component of membrane[GO:0016021]	NA
TR42549|c1_g2_i11	686	1.26017e-49	72	172.17	147842101	hypothetical protein VITISV_008260	Vitis vinifera	NA	NA	NA	membrane[GO:0016020]	NA
TR32028|c2_g2_i2	455	4.10684e-07	100	50.447	147843498	hypothetical protein VITISV_037472	Vitis vinifera	NA	NA	NA	NA	NA
TR42157|c0_g8_i6	254	1.12067e-17	92	77.0258	147844255	hypothetical protein VITISV_022597	Vitis vinifera	NA	NA	NA	NA	NA
TR36980|c0_g5_i2	320	2.93975e-26	88	104.375	147845204	hypothetical protein VITISV_019588	Vitis vinifera	NA	oxidation-reduction process[GO:0055114]	zinc ion binding[GO:0008270] ; oxidoreductase activity[GO:0016491]	NA	NA
TR41939|c0_g4_i1	302	1.50706e-62	93	202.216	147846159	hypothetical protein VITISV_006441	Vitis vinifera	NA	NA	NA	NA	NA
TR30277|c0_g4_i1	447	3.60903e-24	64	104.76	147846680	hypothetical protein VITISV_031642	Vitis vinifera	NA	NA	NA	NA	NA
TR42784|c0_g1_i5	2395	3.70951e-23	63	111.694	147846709	hypothetical protein VITISV_026888	Vitis vinifera	NA	NA	NA	NA	NA
TR30998|c0_g4_i1	598	4.43816e-94	90	288.115	147852164	hypothetical protein VITISV_009404	Vitis vinifera	NA	NA	NA	NA	NA
TR30998|c0_g1_i1	346	1.10512e-47	92	164.851	147852164	hypothetical protein VITISV_009404	Vitis vinifera	NA	NA	NA	NA	NA
TR37399|c1_g5_i1	1001	1.06116e-18	47	67.0106	147853125	hypothetical protein VITISV_010019	Vitis vinifera	NA	NA	NA	NA	NA
TR11454|c0_g1_i1	269	5.04189e-54	100	174.481	147853717	hypothetical protein VITISV_027893	Vitis vinifera	NA	NA	ATP binding[GO:0005524]	NA	NA
TR40750|c0_g1_i4	251	8.24431e-53	100	171.014	147853717	hypothetical protein VITISV_027893	Vitis vinifera	NA	NA	ATP binding[GO:0005524]	NA	NA
TR15957|c0_g1_i1	227	3.14625e-47	100	156.377	147853717	hypothetical protein VITISV_027893	Vitis vinifera	NA	NA	ATP binding[GO:0005524]	NA	NA
TR32974|c0_g3_i1	2464	0	70	589.726	147854093	hypothetical protein VITISV_041406	Vitis vinifera	NA	NA	NA	NA	NA
TR39756|c1_g6_i2	329	1.29142e-63	95	207.994	147854365	hypothetical protein VITISV_041351	Vitis vinifera	NA	carbohydrate metabolic process[GO:0005975]	coenzyme binding[GO:0050662] ; racemase and epimerase activity, acting on carbohydrates and derivatives[GO:0016857]	integral component of membrane[GO:0016021]	NA
TR17043|c0_g2_i1	251	6.48027e-50	98	176.792	147856240	hypothetical protein VITISV_026006	Vitis vinifera	NA	Golgi vesicle transport[GO:0048193]	metal ion binding[GO:0046872] ; DNA binding[GO:0003677] ; RNA binding[GO:0003723]	endoplasmic reticulum[GO:0005783]	NA
TR38930|c0_g1_i3	1155	8.45069e-100	89	317.39	147856246	hypothetical protein VITISV_020570	Vitis vinifera	NA	metabolic process[GO:0008152]	ATPase activity[GO:0016887] ; ATP binding[GO:0005524]	integral component of membrane[GO:0016021]	map00230:Purine metabolism(adenylpyrophosphatase[ec:3.6.1.3])
TR38603|c1_g3_i8	1059	2.77194e-92	68	213.001	147858664	hypothetical protein VITISV_043889	Vitis vinifera	NA	NA	NA	NA	NA
TR42937|c0_g6_i1	365	1.18974e-76	95	234.958	147860835	hypothetical protein VITISV_017269	Vitis vinifera	NA	NA	NA	integral component of membrane[GO:0016021]	NA
TR42937|c0_g3_i1	335	1.74561e-70	97	218.779	147860835	hypothetical protein VITISV_017269	Vitis vinifera	NA	NA	NA	integral component of membrane[GO:0016021]	NA
TR40594|c1_g9_i1	432	5.24591e-14	89	74.7146	147860976	hypothetical protein VITISV_013130	Vitis vinifera	NA	NA	NA	NA	NA
TR27353|c0_g1_i2	632	1.27076e-28	60	120.939	147861359	hypothetical protein VITISV_018454	Vitis vinifera	NA	NA	NA	NA	NA
TR19084|c1_g1_i1	562	6.53027e-05	47	46.2098	147861499	hypothetical protein VITISV_008344	Vitis vinifera	NA	NA	NA	NA	NA
TR43248|c1_g2_i1	538	8.60524e-63	87	206.068	147862085	hypothetical protein VITISV_016760	Vitis vinifera	NA	NA	GTP binding[GO:0005525]	NA	NA
TR15791|c1_g1_i1	2757	0	63	607.06	147862911	hypothetical protein VITISV_017741	Vitis vinifera	NA	NA	NA	NA	NA
TR8012|c0_g1_i10	3573	0	62	726.857	147862911	hypothetical protein VITISV_017741	Vitis vinifera	NA	NA	NA	NA	NA
TR8012|c0_g1_i8	4929	0	64	1090.1	147862911	hypothetical protein VITISV_017741	Vitis vinifera	NA	NA	NA	NA	NA
TR17735|c1_g1_i1	1237	1.77625e-120	72	390.193	147862911	hypothetical protein VITISV_017741	Vitis vinifera	NA	NA	binding[GO:0005488]	NA	NA
TR28644|c0_g6_i7	954	2.54671e-94	93	294.278	147865782	hypothetical protein VITISV_020814	Vitis vinifera	NA	transmembrane transport[GO:0055085] ; metabolic process[GO:0008152]	ATPase activity, coupled to transmembrane movement of substances[GO:0042626] ; ATP binding[GO:0005524]	integral component of membrane[GO:0016021]	NA
TR28644|c0_g6_i8	1129	2.3806e-88	82	281.182	147865782	hypothetical protein VITISV_020814	Vitis vinifera	NA	transmembrane transport[GO:0055085] ; metabolic process[GO:0008152]	ATPase activity, coupled to transmembrane movement of substances[GO:0042626] ; ATP binding[GO:0005524]	integral component of membrane[GO:0016021]	NA
TR1479|c0_g2_i2	1044	7.17384e-68	71	221.09	147866055	hypothetical protein VITISV_027913	Vitis vinifera	NA	NA	NA	NA	NA
TR32369|c0_g3_i1	231	2.26808e-24	100	101.293	147866731	hypothetical protein VITISV_018472	Vitis vinifera	NA	protein transport[GO:0015031]	NA	integral component of membrane[GO:0016021]	NA
TR36749|c0_g1_i1	377	1.55411e-35	100	127.872	148250189	SecY protein	Arachis diogoi	NA	protein transport[GO:0015031]	NA	integral component of membrane[GO:0016021]	NA
TR38345|c0_g5_i2	320	1.32769e-49	89	166.007	148595724	YA3	Antirrhinum majus	NA	regulation of transcription, DNA-templated[GO:0006355]	transcription factor activity, sequence-specific DNA binding[GO:0003700] ; DNA binding[GO:0003677]	CCAAT-binding factor complex[GO:0016602]	NA
TR38345|c0_g3_i5	264	6.82311e-16	97	75.8702	148595724	YA3	Antirrhinum majus	NA	regulation of transcription, DNA-templated[GO:0006355]	transcription factor activity, sequence-specific DNA binding[GO:0003700] ; DNA binding[GO:0003677]	CCAAT-binding factor complex[GO:0016602]	NA
TR30956|c0_g1_i2	739	8.90252e-89	95	276.174	148608679	auxin influx carrier, partial	Malus domestica	NA	NA	NA	integral component of membrane[GO:0016021]	NA
TR42858|c0_g11_i1	290	4.89587e-43	88	148.673	148807199	putative ATPDIL1-4 electron transporter	Prunus dulcis	NA	cell redox homeostasis[GO:0045454]	NA	cell[GO:0005623]	NA
TR44720|c2_g4_i2	789	2.17654e-88	92	271.166	148807201	putative NAD dependent malic enzyme	Prunus dulcis	NA	malate metabolic process[GO:0006108] ; oxidation-reduction process[GO:0055114]	malate dehydrogenase (decarboxylating) (NAD+) activity[GO:0004471]	NA	map00620:Pyruvate metabolism(dehydrogenase (decarboxylating)[ec:1.1.1.39]) ; map00620:Pyruvate metabolism(dehydrogenase (oxaloacetate-decarboxylating)[ec:1.1.1.38]) ; map00710:Carbon fixation in photosynthetic organisms(dehydrogenase (decarboxylating)[ec:1.1.1.39])
TR37092|c5_g1_i1	377	2.25032e-86	99	258.07	148841109	beta-tubulin 1	Gossypium hirsutum	NA	microtubule-based process[GO:0007017] ; metabolic process[GO:0008152]	structural constituent of cytoskeleton[GO:0005200] ; GTP binding[GO:0005525] ; GTPase activity[GO:0003924]	microtubule[GO:0005874]	NA
TR31449|c0_g1_i9	1171	2.3531e-145	80	424.476	148887817	menthol dehydrogenase	Mentha canadensis	Lamiaceae	oxidation-reduction process[GO:0055114]	oxidoreductase activity[GO:0016491]	NA	NA
TR31449|c0_g1_i6	1133	2.3212e-131	78	388.267	148887817	menthol dehydrogenase	Mentha canadensis	Lamiaceae	metabolic process[GO:0008152]	NA	NA	NA
TR43997|c1_g2_i1	236	3.22612e-45	97	149.828	148888569	plasma membrane H+ ATPase	Oryza sativa Indica Group	NA	metabolic process[GO:0008152]	ATP binding[GO:0005524] ; hydrolase activity[GO:0016787]	integral component of membrane[GO:0016021]	NA
TR42812|c3_g9_i1	335	2.24242e-73	99	229.95	149207273	fructose-1,6-bisphosphatase	Flaveria linearis	NA	dephosphorylation[GO:0016311] ; carbohydrate metabolic process[GO:0005975]	fructose 1,6-bisphosphate 1-phosphatase activity[GO:0042132]	NA	map00030:Pentose phosphate pathway(hexose diphosphatase[ec:3.1.3.11]) ; map01130:Biosynthesis of antibiotics(hexose diphosphatase[ec:3.1.3.11]) ; map00051:Fructose and mannose metabolism(hexose diphosphatase[ec:3.1.3.11]) ; map00710:Carbon fixation in photosynthetic organisms(hexose diphosphatase[ec:3.1.3.11]) ; map00010:Glycolysis / Gluconeogenesis(hexose diphosphatase[ec:3.1.3.11]) ; map00680:M…
TR36926|c1_g3_i2	400	2.54443e-89	100	267.314	149391017	26S protease regulatory subunit 8	Oryza sativa Indica Group	NA	proteolysis[GO:0006508]	ATP binding[GO:0005524] ; peptidase activity[GO:0008233]	NA	NA
TR38907|c1_g2_i1	374	1.09455e-82	99	248.44	149391181	mitochondrial ADP, ATP carrier protein precursor	Oryza sativa Indica Group	NA	transmembrane transport[GO:0055085]	transporter activity[GO:0005215]	mitochondrial inner membrane[GO:0005743] ; integral component of membrane[GO:0016021]	NA
TR35196|c0_g1_i1	374	2.64116e-29	94	109.383	149391728	argininosuccinate synthase	Oryza sativa Indica Group	NA	arginine biosynthetic process[GO:0006526]	ATP binding[GO:0005524] ; argininosuccinate synthase activity[GO:0004055]	NA	map00220:Arginine biosynthesis(synthase[ec:6.3.4.5]) ; map00250:Alanine, aspartate and glutamate metabolism(synthase[ec:6.3.4.5]) ; map01130:Biosynthesis of antibiotics(synthase[ec:6.3.4.5])
TR2750|c4_g3_i2	275	2.31947e-17	100	76.2554	149391947	histone h4	Oryza sativa Indica Group	NA	NA	protein heterodimerization activity[GO:0046982] ; DNA binding[GO:0003677]	nucleosome[GO:0000786] ; nucleus[GO:0005634]	NA
TR40750|c0_g3_i3	547	6.91203e-32	100	121.324	149392223	26S protease regulatory subunit 7	Oryza sativa Indica Group	NA	proteolysis[GO:0006508]	ATP binding[GO:0005524] ; peptidase activity[GO:0008233]	NA	NA
TR35247|c1_g3_i1	416	3.40809e-16	85	75.485	149392242	DnaJ heat shock protein	Oryza sativa Indica Group	NA	NA	NA	NA	NA
TR34275|c0_g1_i2	272	2.52965e-55	97	177.948	149392465	ferredoxin-nadp reductase, leaf isozyme	Oryza sativa Indica Group	NA	oxidation-reduction process[GO:0055114]	oxidoreductase activity[GO:0016491]	NA	NA
TR36875|c1_g6_i1	266	2.21909e-51	96	168.318	149392519	oxygen-evolving enhancer protein 1	Oryza sativa Indica Group	NA	photosystem II stabilization[GO:0042549] ; photosynthesis[GO:0015979]	calcium ion binding[GO:0005509]	photosystem II oxygen evolving complex[GO:0009654] ; extrinsic component of membrane[GO:0019898] ; integral component of membrane[GO:0016021]	NA
TR18009|c0_g1_i1	464	1.65885e-05	65	46.9802	149392673	glycogen synthase kinase-3-like protein	Oryza sativa Indica Group	NA	NA	NA	NA	NA
TR37052|c0_g2_i2	272	2.3966e-54	94	173.711	149392729	cytosol aminopeptidase	Oryza sativa Indica Group	NA	proteolysis[GO:0006508]	aminopeptidase activity[GO:0004177]	cytoplasmic, membrane-bounded vesicle[GO:0016023]	NA
TR21923|c0_g2_i2	350	1.27492e-33	98	121.709	149392729	cytosol aminopeptidase	Oryza sativa Indica Group	NA	proteolysis[GO:0006508]	aminopeptidase activity[GO:0004177]	cytoplasmic, membrane-bounded vesicle[GO:0016023]	NA
TR31787|c1_g4_i1	1296	5.48141e-16	49	86.2705	149676198	putative transposase	Ipomoea tricolor	NA	NA	NA	NA	NA
TR24879|c0_g1_i1	1239	1.97217e-12	50	75.0998	149676198	putative transposase	Ipomoea tricolor	NA	NA	NA	NA	NA
TR41505|c1_g3_i2	438	5.48664e-06	69	50.8322	149676198	putative transposase	Ipomoea tricolor	NA	NA	NA	NA	NA
TR38406|c3_g3_i1	805	1.85209e-124	99	365.54	150375629	actin 3, partial	Torenia fournieri	NA	NA	NA	NA	NA
TR26139|c1_g1_i3	408	2.77436e-24	83	96.6709	151301842	putative metallothionin 2a	Salvia miltiorrhiza	NA	NA	metal ion binding[GO:0046872]	NA	NA
TR26139|c1_g1_i1	554	7.56704e-12	75	64.6994	151301842	putative metallothionin 2a	Salvia miltiorrhiza	NA	NA	NA	NA	NA
TR29552|c0_g1_i1	1518	0	91	626.32	151301846	putative aldo/keto reductase 1	Salvia miltiorrhiza	NA	NA	NA	NA	NA
TR29725|c0_g1_i1	825	2.04275e-177	91	503.056	151301846	putative aldo/keto reductase 1	Salvia miltiorrhiza	NA	NA	NA	NA	NA
TR29725|c0_g1_i2	1239	9.68264e-152	92	377.481	151301846	putative aldo/keto reductase 1	Salvia miltiorrhiza	NA	NA	NA	NA	NA
TR33234|c1_g2_i6	947	0	94	550.051	151301848	putative aldo/keto reductase 2	Salvia miltiorrhiza	NA	oxidation-reduction process[GO:0055114]	oxidoreductase activity[GO:0016491]	NA	NA
TR33234|c1_g2_i9	635	6.10525e-134	93	389.037	151301848	putative aldo/keto reductase 2	Salvia miltiorrhiza	NA	oxidation-reduction process[GO:0055114]	oxidoreductase activity[GO:0016491]	NA	NA
TR33234|c1_g2_i8	498	1.67282e-78	96	245.743	151301848	putative aldo/keto reductase 2	Salvia miltiorrhiza	NA	oxidation-reduction process[GO:0055114]	oxidoreductase activity[GO:0016491]	NA	NA
TR23940|c0_g1_i1	873	1.54489e-70	72	226.483	151301850	putative ethylene-responsive element binding protein	Salvia miltiorrhiza	NA	NA	NA	NA	NA
TR30772|c0_g1_i2	743	8.04325e-41	63	148.288	151301850	putative ethylene-responsive element binding protein	Salvia miltiorrhiza	NA	NA	NA	NA	NA
TR30772|c0_g1_i4	819	2.18602e-38	56	142.51	151301850	putative ethylene-responsive element binding protein	Salvia miltiorrhiza	NA	NA	NA	NA	NA
TR30772|c0_g1_i1	710	2.86316e-37	58	138.658	151301850	putative ethylene-responsive element binding protein	Salvia miltiorrhiza	NA	NA	NA	NA	NA
TR31870|c2_g1_i1	824	9.80065e-105	89	313.538	151301852	putative dienelactone hydrolase family protein	Salvia miltiorrhiza	NA	metabolic process[GO:0008152]	hydrolase activity[GO:0016787]	NA	NA
TR31870|c1_g1_i2	461	7.20806e-51	83	171.014	151301852	putative dienelactone hydrolase family protein	Salvia miltiorrhiza	NA	metabolic process[GO:0008152]	hydrolase activity[GO:0016787]	NA	NA
TR31870|c2_g3_i1	294	8.07748e-45	89	152.91	151301852	putative dienelactone hydrolase family protein	Salvia miltiorrhiza	NA	metabolic process[GO:0008152]	hydrolase activity[GO:0016787]	NA	NA
TR1661|c0_g3_i1	248	2.92154e-34	86	124.79	151301852	putative dienelactone hydrolase family protein	Salvia miltiorrhiza	NA	metabolic process[GO:0008152]	hydrolase activity[GO:0016787]	NA	NA
TR27719|c0_g2_i2	702	9.39491e-97	95	288.886	151301856	putative translationally controlled tumor protein	Salvia miltiorrhiza	NA	NA	NA	NA	NA
TR42297|c2_g5_i1	224	4.35348e-26	91	101.679	151368158	chloroplast transketolase precursor, partial	Gossypium barbadense	NA	NA	NA	NA	NA
TR17832|c0_g1_i1	312	1.39377e-60	99	194.126	151413570	vacuolar H+-pyrophosphatase	Eriobotrya japonica	NA	metabolic process[GO:0008152] ; proton transport[GO:0015992] ; transmembrane transport[GO:0055085]	inorganic diphosphatase activity[GO:0004427] ; hydrogen-translocating pyrophosphatase activity[GO:0009678]	integral component of membrane[GO:0016021]	map00190:Oxidative phosphorylation(diphosphatase[ec:3.6.1.1])
TR2951|c0_g1_i1	310	8.43293e-45	93	150.599	151564277	SKP1 component-like 1	Humulus lupulus	NA	ubiquitin-dependent protein catabolic process[GO:0006511]	NA	NA	NA
TR40214|c0_g1_i3	254	1.11872e-52	97	170.244	152003534	glycoprotease M22 family protein	Arabidopsis lyrata subsp. petraea	NA	proteolysis[GO:0006508]	peptidase activity[GO:0008233]	NA	NA
TR43286|c0_g3_i5	993	3.20778e-40	72	148.288	152148404	flowering time control protein	Stenogyne rugosa	Lamiaceae	NA	NA	NA	NA
TR36720|c0_g2_i2	263	7.41339e-37	96	129.413	154254841	putative chloroplast glyceradehyde-3-phosphate dehydrogenase subunit B	Olea europaea	NA	oxidation-reduction process[GO:0055114]	glyceraldehyde-3-phosphate dehydrogenase (NADP+) (phosphorylating) activity[GO:0047100]	NA	map00710:Carbon fixation in photosynthetic organisms(dehydrogenase (NADP+) (phosphorylating)[ec:1.2.1.13])
TR32829|c0_g5_i1	260	9.56208e-51	96	166.777	154257309	putative glyoxisomal malate dehydrogenase, partial	Olea europaea	NA	carbohydrate metabolic process[GO:0005975] ; malate metabolic process[GO:0006108] ; tricarboxylic acid cycle[GO:0006099]	L-malate dehydrogenase activity[GO:0030060]	NA	map00630:Glyoxylate and dicarboxylate metabolism(dehydrogenase[ec:1.1.1.37]) ; map01130:Biosynthesis of antibiotics(dehydrogenase[ec:1.1.1.37]) ; map00720:Carbon fixation pathways in prokaryotes(dehydrogenase[ec:1.1.1.37]) ; map00020:Citrate cycle (TCA cycle)(dehydrogenase[ec:1.1.1.37]) ; map00620:Pyruvate metabolism(dehydrogenase[ec:1.1.1.37]) ; map00270:Cysteine and methionine metabolism(dehydr…
TR13553|c0_g2_i1	285	2.37381e-17	100	77.7962	154756874	putative histone 2A, partial	Hypericum perforatum	NA	NA	protein heterodimerization activity[GO:0046982] ; DNA binding[GO:0003677]	nucleosome[GO:0000786] ; nucleus[GO:0005634]	NA
TR38933|c0_g1_i7	1202	0	97	641.343	155212986	mitogen activated protein kinase kinase 1	Origanum onites	Lamiaceae	protein phosphorylation[GO:0006468]	protein kinase activity[GO:0004672] ; ATP binding[GO:0005524]	NA	NA
TR39882|c1_g1_i1	451	7.9547e-16	83	78.9518	155212986	mitogen activated protein kinase kinase 1	Origanum onites	Lamiaceae	protein phosphorylation[GO:0006468]	protein kinase activity[GO:0004672] ; ATP binding[GO:0005524]	NA	NA
TR23304|c0_g1_i1	522	6.44463e-37	100	134.035	156104846	hypothetical protein	Malus domestica	NA	NA	NA	NA	NA
TR40362|c0_g2_i3	473	6.93874e-95	93	294.664	156145739	phospholipase C	Torenia fournieri	NA	intracellular signal transduction[GO:0035556] ; lipid catabolic process[GO:0016042]	signal transducer activity[GO:0004871] ; phosphatidylinositol phospholipase C activity[GO:0004435]	intracellular[GO:0005622]	map04070:Phosphatidylinositol signaling system(phospholipase C[ec:3.1.4.11]) ; map00562:Inositol phosphate metabolism(phospholipase C[ec:3.1.4.11])
TR23139|c0_g3_i1	932	1.31246e-89	66	277.715	156616771	SMLII	Salvia miltiorrhiza	NA	NA	NA	NA	NA
TR6520|c0_g1_i1	1081	3.09862e-73	68	237.269	156616771	SMLII	Salvia miltiorrhiza	NA	NA	NA	NA	NA
TR21652|c0_g1_i1	909	7.12311e-67	65	218.779	156616771	SMLII	Salvia miltiorrhiza	NA	NA	NA	NA	NA
TR29823|c5_g2_i2	1096	4.09844e-65	63	216.468	156616771	SMLII	Salvia miltiorrhiza	NA	NA	NA	NA	NA
TR3934|c0_g1_i1	758	1.27345e-60	62	201.06	156616771	SMLII	Salvia miltiorrhiza	NA	NA	NA	NA	NA
TR25259|c0_g1_i1	1033	3.46775e-59	63	200.29	156616771	SMLII	Salvia miltiorrhiza	NA	NA	NA	NA	NA
TR23200|c1_g1_i1	934	1.93519e-58	64	197.593	156616771	SMLII	Salvia miltiorrhiza	NA	NA	NA	NA	NA
TR26410|c0_g2_i6	786	3.5811e-54	69	184.496	156616771	SMLII	Salvia miltiorrhiza	NA	NA	NA	NA	NA
TR3934|c0_g1_i12	813	1.37936e-53	62	183.341	156616771	SMLII	Salvia miltiorrhiza	NA	NA	NA	NA	NA
TR3934|c0_g1_i9	639	8.46665e-45	58	158.688	156616771	SMLII	Salvia miltiorrhiza	NA	NA	NA	NA	NA
TR35271|c1_g3_i4	636	1.80059e-44	72	157.532	156616771	SMLII	Salvia miltiorrhiza	NA	NA	NA	NA	NA
TR48845|c0_g1_i1	970	1.16348e-42	56	156.377	156616771	SMLII	Salvia miltiorrhiza	NA	NA	NA	NA	NA
TR29823|c5_g2_i1	670	1.47936e-41	63	150.214	156616771	SMLII	Salvia miltiorrhiza	NA	NA	NA	NA	NA
TR25259|c0_g1_i5	609	6.0614e-40	60	145.591	156616771	SMLII	Salvia miltiorrhiza	NA	NA	NA	NA	NA
TR19437|c0_g1_i1	753	2.0766e-36	54	109.383	156616771	SMLII	Salvia miltiorrhiza	NA	NA	NA	NA	NA
TR3934|c0_g1_i8	855	5.32115e-33	59	129.798	156616771	SMLII	Salvia miltiorrhiza	NA	NA	NA	NA	NA
TR35271|c1_g2_i1	521	9.89784e-33	55	125.561	156616771	SMLII	Salvia miltiorrhiza	NA	NA	NA	NA	NA
TR29823|c5_g1_i2	469	2.25905e-28	63	113.235	156616771	SMLII	Salvia miltiorrhiza	NA	NA	NA	NA	NA
TR3934|c0_g2_i1	377	2.96247e-28	69	111.694	156616771	SMLII	Salvia miltiorrhiza	NA	NA	NA	NA	NA
TR27510|c0_g1_i2	968	8.39233e-28	50	116.316	156616771	SMLII	Salvia miltiorrhiza	NA	NA	NA	NA	NA
TR29823|c0_g1_i1	416	1.75309e-26	66	107.457	156616771	SMLII	Salvia miltiorrhiza	NA	NA	NA	NA	NA
TR17361|c0_g1_i1	937	2.31915e-26	47	112.079	156616771	SMLII	Salvia miltiorrhiza	NA	NA	NA	NA	NA
TR3934|c0_g1_i14	436	1.32467e-23	71	99.7525	156616771	SMLII	Salvia miltiorrhiza	NA	NA	NA	NA	NA
TR35271|c1_g3_i3	257	7.47268e-23	79	95.5153	156616771	SMLII	Salvia miltiorrhiza	NA	NA	carbohydrate binding[GO:0030246]	NA	NA
TR26410|c0_g3_i1	246	1.43996e-19	63	86.2705	156616771	SMLII	Salvia miltiorrhiza	NA	NA	NA	NA	NA
TR23991|c0_g3_i5	440	6.89295e-18	57	83.9593	156616771	SMLII	Salvia miltiorrhiza	NA	NA	NA	NA	NA
TR35271|c1_g2_i4	233	3.41094e-15	58	73.559	156616771	SMLII	Salvia miltiorrhiza	NA	NA	NA	NA	NA
TR15725|c0_g1_i2	255	3.52212e-14	71	71.2478	156616771	SMLII	Salvia miltiorrhiza	NA	NA	NA	NA	NA
TR24715|c0_g2_i1	814	6.64683e-11	46	67.0106	156616771	SMLII	Salvia miltiorrhiza	NA	NA	NA	NA	NA
TR23991|c0_g2_i1	264	1.3436e-09	52	58.9214	156616771	SMLII	Salvia miltiorrhiza	NA	NA	NA	NA	NA
TR12578|c0_g1_i1	280	7.15042e-09	58	56.9954	156616771	SMLII	Salvia miltiorrhiza	NA	NA	NA	NA	NA
TR23991|c0_g3_i2	278	1.84154e-06	66	50.447	156616771	SMLII	Salvia miltiorrhiza	NA	NA	NA	NA	NA
TR35271|c1_g2_i2	351	3.42887e-06	54	50.0618	156616771	SMLII	Salvia miltiorrhiza	NA	NA	NA	NA	NA
TR23991|c0_g1_i1	311	4.31969e-06	55	49.6766	156616771	SMLII	Salvia miltiorrhiza	NA	NA	NA	NA	NA
TR17240|c0_g1_i1	230	4.27236e-40	96	144.821	156628058	phospholipid/glycerol acyltransferase	Helianthus annuus	NA	metabolic process[GO:0008152]	transferase activity, transferring acyl groups[GO:0016746]	integral component of membrane[GO:0016021]	NA
TR42641|c0_g15_i1	458	1.68867e-84	94	258.84	156640561	vacuolar H+-pyrophosphatase	Zygophyllum xanthoxylum	NA	metabolic process[GO:0008152] ; proton transport[GO:0015992] ; transmembrane transport[GO:0055085]	inorganic diphosphatase activity[GO:0004427] ; hydrogen-translocating pyrophosphatase activity[GO:0009678]	integral component of membrane[GO:0016021]	map00190:Oxidative phosphorylation(diphosphatase[ec:3.6.1.1])
TR33344|c0_g1_i2	458	7.53475e-70	99	216.083	157042737	2-C-methyl-D-erythritol 2,4-cyclodiphosphate synthase	Nicotiana langsdorffii x Nicotiana sanderae	NA	terpenoid biosynthetic process[GO:0016114]	2-C-methyl-D-erythritol 2,4-cyclodiphosphate synthase activity[GO:0008685]	NA	map01130:Biosynthesis of antibiotics(2,4-cyclodiphosphate synthase[ec:4.6.1.12]) ; map00900:Terpenoid backbone biosynthesis(2,4-cyclodiphosphate synthase[ec:4.6.1.12])
TR33344|c0_g1_i1	452	3.68671e-60	98	191.045	157042737	2-C-methyl-D-erythritol 2,4-cyclodiphosphate synthase	Nicotiana langsdorffii x Nicotiana sanderae	NA	terpenoid biosynthetic process[GO:0016114]	2-C-methyl-D-erythritol 2,4-cyclodiphosphate synthase activity[GO:0008685]	NA	map01130:Biosynthesis of antibiotics(2,4-cyclodiphosphate synthase[ec:4.6.1.12]) ; map00900:Terpenoid backbone biosynthesis(2,4-cyclodiphosphate synthase[ec:4.6.1.12])
TR41088|c0_g3_i1	404	5.7187e-11	96	60.8474	157042743	cytosolic acetoacetyl-coenzyme A thiolase, partial	Nicotiana langsdorffii x Nicotiana sanderae	NA	metabolic process[GO:0008152]	transferase activity, transferring acyl groups other than amino-acyl groups[GO:0016747]	NA	NA
TR32228|c1_g1_i4	1355	3.5757e-175	89	502.671	157072591	isopentenyl pyrophosphate isomerase	Salvia miltiorrhiza	NA	isoprenoid biosynthetic process[GO:0008299]	hydrolase activity[GO:0016787] ; isopentenyl-diphosphate delta-isomerase activity[GO:0004452]	NA	map01130:Biosynthesis of antibiotics(Delta-isomerase[ec:5.3.3.2]) ; map00900:Terpenoid backbone biosynthesis(Delta-isomerase[ec:5.3.3.2])
TR32228|c1_g1_i7	577	8.03444e-100	91	300.056	157072591	isopentenyl pyrophosphate isomerase	Salvia miltiorrhiza	NA	isoprenoid biosynthetic process[GO:0008299]	hydrolase activity[GO:0016787] ; isopentenyl-diphosphate delta-isomerase activity[GO:0004452]	NA	map01130:Biosynthesis of antibiotics(Delta-isomerase[ec:5.3.3.2]) ; map00900:Terpenoid backbone biosynthesis(Delta-isomerase[ec:5.3.3.2])
TR32228|c0_g1_i1	446	3.74308e-15	70	76.2554	157072591	isopentenyl pyrophosphate isomerase	Salvia miltiorrhiza	NA	NA	catalytic activity[GO:0003824]	NA	NA
TR41088|c0_g8_i5	590	7.20819e-128	95	375.17	157072595	acetoacetyl-coenzyme A thiolase	Salvia miltiorrhiza	NA	metabolic process[GO:0008152]	transferase activity, transferring acyl groups other than amino-acyl groups[GO:0016747]	NA	NA
TR41088|c0_g8_i4	527	3.29113e-117	97	347.051	157072595	acetoacetyl-coenzyme A thiolase	Salvia miltiorrhiza	NA	metabolic process[GO:0008152]	transferase activity, transferring acyl groups other than amino-acyl groups[GO:0016747]	NA	NA
TR41088|c0_g2_i2	482	6.16285e-107	98	320.087	157072595	acetoacetyl-coenzyme A thiolase	Salvia miltiorrhiza	NA	metabolic process[GO:0008152]	transferase activity, transferring acyl groups other than amino-acyl groups[GO:0016747]	NA	NA
TR41088|c0_g7_i1	341	1.24536e-73	96	232.646	157072595	acetoacetyl-coenzyme A thiolase	Salvia miltiorrhiza	NA	metabolic process[GO:0008152]	transferase activity, transferring acyl groups other than amino-acyl groups[GO:0016747]	NA	NA
TR10112|c0_g1_i1	345	3.1705e-70	97	223.787	157072595	acetoacetyl-coenzyme A thiolase	Salvia miltiorrhiza	NA	metabolic process[GO:0008152]	transferase activity, transferring acyl groups other than amino-acyl groups[GO:0016747]	NA	NA
TR41088|c0_g8_i3	233	2.93052e-41	97	146.362	157072595	acetoacetyl-coenzyme A thiolase	Salvia miltiorrhiza	NA	metabolic process[GO:0008152]	transferase activity, transferring acyl groups other than amino-acyl groups[GO:0016747]	NA	NA
TR2250|c2_g2_i2	698	3.91326e-96	92	286.96	157168620	Sal m 1 allergen	Salvia miltiorrhiza	NA	response to biotic stimulus[GO:0009607] ; defense response[GO:0006952]	NA	NA	NA
TR2250|c2_g2_i1	852	4.36293e-52	89	176.407	157168620	Sal m 1 allergen	Salvia miltiorrhiza	NA	response to biotic stimulus[GO:0009607] ; defense response[GO:0006952]	NA	NA	NA
TR2250|c2_g2_i5	340	2.88065e-32	95	119.013	157168620	Sal m 1 allergen	Salvia miltiorrhiza	NA	response to biotic stimulus[GO:0009607] ; defense response[GO:0006952]	NA	NA	NA
TR41463|c2_g2_i1	240	9.81468e-40	92	136.732	157419775	lipoxygenase	Ocimum x africanum	NA	oxidation-reduction process[GO:0055114]	metal ion binding[GO:0046872] ; oxidoreductase activity, acting on single donors with incorporation of molecular oxygen, incorporation of two atoms of oxygen[GO:0016702]	NA	NA
TR41805|c1_g3_i1	239	4.57874e-48	100	157.918	157503123	elongation factor-1 alpha	Catharanthus roseus	NA	translational elongation[GO:0006414]	translation elongation factor activity[GO:0003746] ; GTP binding[GO:0005525]	NA	NA
TR25093|c1_g3_i1	376	5.62958e-09	78	56.6102	157688320	glycine-rich protein 1	Boea hygrometrica	NA	NA	NA	NA	NA
TR29273|c0_g1_i4	263	3.96588e-07	73	50.447	157688320	glycine-rich protein 1	Boea hygrometrica	NA	NA	NA	NA	NA
TR25770|c0_g1_i1	582	6.08094e-07	76	51.9878	157688320	glycine-rich protein 1	Boea hygrometrica	NA	NA	NA	NA	NA
TR29273|c0_g1_i3	569	2.57288e-06	73	50.447	157688320	glycine-rich protein 1	Boea hygrometrica	NA	NA	NA	NA	NA
TR43404|c0_g3_i3	875	6.15359e-146	97	418.698	157780815	PAL	Solenostemon scutellarioides	NA	metabolic process[GO:0008152]	catalytic activity[GO:0003824]	NA	NA
TR43404|c0_g3_i6	606	4.56423e-97	96	290.812	157780815	PAL	Solenostemon scutellarioides	NA	metabolic process[GO:0008152]	catalytic activity[GO:0003824]	NA	NA
TR43404|c0_g3_i2	400	4.28157e-89	99	267.7	157780815	PAL	Solenostemon scutellarioides	NA	metabolic process[GO:0008152]	catalytic activity[GO:0003824]	NA	NA
TR21276|c0_g1_i2	271	4.8888e-54	96	176.022	157780815	PAL	Solenostemon scutellarioides	NA	metabolic process[GO:0008152]	catalytic activity[GO:0003824]	NA	NA
TR2876|c1_g2_i2	1399	1.91796e-105	65	327.405	157884777	cinnamate/p-coumarate carboxyl methyltransferase 2	Ocimum basilicum	Lamiaceae	NA	NA	NA	NA
TR2876|c2_g1_i1	475	2.27695e-76	96	240.736	157884777	cinnamate/p-coumarate carboxyl methyltransferase 2	Ocimum basilicum	Lamiaceae	methylation[GO:0032259]	methyltransferase activity[GO:0008168]	NA	NA
TR30741|c0_g7_i2	380	1.83863e-83	100	251.521	157987285	light-harvesting chlorphyll binding protein 3	Solenostemon scutellarioides	NA	photosynthesis, light harvesting[GO:0009765] ; protein-chromophore linkage[GO:0018298]	chlorophyll binding[GO:0016168]	photosystem II[GO:0009523] ; integral component of membrane[GO:0016021] ; chloroplast[GO:0009507]	NA
TR21400|c0_g1_i6	389	2.22747e-76	95	235.343	158147271	putative ethylene overproducer-like 1	Prunus salicina	NA	NA	NA	NA	NA
TR44277|c4_g3_i3	246	1.3098e-44	95	151.754	158147271	putative ethylene overproducer-like 1	Prunus salicina	NA	NA	NA	NA	NA
TR41296|c0_g2_i1	236	3.97664e-30	97	111.309	158562464	plasma membrane H(+) ATPase	Oryza sativa Indica Group	NA	metabolic process[GO:0008152]	ATPase activity[GO:0016887] ; ATP binding[GO:0005524]	integral component of membrane[GO:0016021]	map00230:Purine metabolism(adenylpyrophosphatase[ec:3.6.1.3])
TR37991|c0_g1_i2	850	0	98	552.747	158712040	malate dehydrogenase	Perilla frutescens	Lamiaceae	carbohydrate metabolic process[GO:0005975] ; malate metabolic process[GO:0006108] ; tricarboxylic acid cycle[GO:0006099]	L-malate dehydrogenase activity[GO:0030060]	NA	map00630:Glyoxylate and dicarboxylate metabolism(dehydrogenase[ec:1.1.1.37]) ; map01130:Biosynthesis of antibiotics(dehydrogenase[ec:1.1.1.37]) ; map00720:Carbon fixation pathways in prokaryotes(dehydrogenase[ec:1.1.1.37]) ; map00020:Citrate cycle (TCA cycle)(dehydrogenase[ec:1.1.1.37]) ; map00620:Pyruvate metabolism(dehydrogenase[ec:1.1.1.37]) ; map00270:Cysteine and methionine metabolism(dehydr…
TR37991|c0_g3_i4	612	5.54123e-88	97	271.937	158712040	malate dehydrogenase	Perilla frutescens	Lamiaceae	carbohydrate metabolic process[GO:0005975] ; malate metabolic process[GO:0006108] ; tricarboxylic acid cycle[GO:0006099]	L-malate dehydrogenase activity[GO:0030060]	NA	map00630:Glyoxylate and dicarboxylate metabolism(dehydrogenase[ec:1.1.1.37]) ; map01130:Biosynthesis of antibiotics(dehydrogenase[ec:1.1.1.37]) ; map00720:Carbon fixation pathways in prokaryotes(dehydrogenase[ec:1.1.1.37]) ; map00020:Citrate cycle (TCA cycle)(dehydrogenase[ec:1.1.1.37]) ; map00620:Pyruvate metabolism(dehydrogenase[ec:1.1.1.37]) ; map00270:Cysteine and methionine metabolism(dehydr…
TR37991|c0_g3_i1	398	1.2593e-79	95	247.284	158712040	malate dehydrogenase	Perilla frutescens	Lamiaceae	carbohydrate metabolic process[GO:0005975] ; malate metabolic process[GO:0006108] ; tricarboxylic acid cycle[GO:0006099]	L-malate dehydrogenase activity[GO:0030060]	NA	map00630:Glyoxylate and dicarboxylate metabolism(dehydrogenase[ec:1.1.1.37]) ; map01130:Biosynthesis of antibiotics(dehydrogenase[ec:1.1.1.37]) ; map00720:Carbon fixation pathways in prokaryotes(dehydrogenase[ec:1.1.1.37]) ; map00020:Citrate cycle (TCA cycle)(dehydrogenase[ec:1.1.1.37]) ; map00620:Pyruvate metabolism(dehydrogenase[ec:1.1.1.37]) ; map00270:Cysteine and methionine metabolism(dehydr…
TR37991|c0_g1_i5	325	4.94751e-67	98	214.157	158712040	malate dehydrogenase	Perilla frutescens	Lamiaceae	carbohydrate metabolic process[GO:0005975] ; malate metabolic process[GO:0006108] ; tricarboxylic acid cycle[GO:0006099]	L-malate dehydrogenase activity[GO:0030060]	NA	map00630:Glyoxylate and dicarboxylate metabolism(dehydrogenase[ec:1.1.1.37]) ; map01130:Biosynthesis of antibiotics(dehydrogenase[ec:1.1.1.37]) ; map00720:Carbon fixation pathways in prokaryotes(dehydrogenase[ec:1.1.1.37]) ; map00020:Citrate cycle (TCA cycle)(dehydrogenase[ec:1.1.1.37]) ; map00620:Pyruvate metabolism(dehydrogenase[ec:1.1.1.37]) ; map00270:Cysteine and methionine metabolism(dehydr…
TR32829|c0_g7_i2	290	1.71648e-56	95	186.422	158712040	malate dehydrogenase	Perilla frutescens	Lamiaceae	carbohydrate metabolic process[GO:0005975] ; malate metabolic process[GO:0006108] ; tricarboxylic acid cycle[GO:0006099]	L-malate dehydrogenase activity[GO:0030060]	NA	map00630:Glyoxylate and dicarboxylate metabolism(dehydrogenase[ec:1.1.1.37]) ; map01130:Biosynthesis of antibiotics(dehydrogenase[ec:1.1.1.37]) ; map00720:Carbon fixation pathways in prokaryotes(dehydrogenase[ec:1.1.1.37]) ; map00020:Citrate cycle (TCA cycle)(dehydrogenase[ec:1.1.1.37]) ; map00620:Pyruvate metabolism(dehydrogenase[ec:1.1.1.37]) ; map00270:Cysteine and methionine metabolism(dehydr…
TR32829|c0_g7_i5	443	1.95287e-56	95	188.348	158712040	malate dehydrogenase	Perilla frutescens	Lamiaceae	carbohydrate metabolic process[GO:0005975] ; malate metabolic process[GO:0006108] ; tricarboxylic acid cycle[GO:0006099]	L-malate dehydrogenase activity[GO:0030060]	NA	map00630:Glyoxylate and dicarboxylate metabolism(dehydrogenase[ec:1.1.1.37]) ; map01130:Biosynthesis of antibiotics(dehydrogenase[ec:1.1.1.37]) ; map00720:Carbon fixation pathways in prokaryotes(dehydrogenase[ec:1.1.1.37]) ; map00020:Citrate cycle (TCA cycle)(dehydrogenase[ec:1.1.1.37]) ; map00620:Pyruvate metabolism(dehydrogenase[ec:1.1.1.37]) ; map00270:Cysteine and methionine metabolism(dehydr…
TR32829|c0_g2_i2	288	1.86012e-54	97	181.03	158712040	malate dehydrogenase	Perilla frutescens	Lamiaceae	carbohydrate metabolic process[GO:0005975] ; malate metabolic process[GO:0006108] ; tricarboxylic acid cycle[GO:0006099]	L-malate dehydrogenase activity[GO:0030060]	NA	map00630:Glyoxylate and dicarboxylate metabolism(dehydrogenase[ec:1.1.1.37]) ; map01130:Biosynthesis of antibiotics(dehydrogenase[ec:1.1.1.37]) ; map00720:Carbon fixation pathways in prokaryotes(dehydrogenase[ec:1.1.1.37]) ; map00020:Citrate cycle (TCA cycle)(dehydrogenase[ec:1.1.1.37]) ; map00620:Pyruvate metabolism(dehydrogenase[ec:1.1.1.37]) ; map00270:Cysteine and methionine metabolism(dehydr…
TR32829|c0_g2_i3	525	5.39689e-52	95	177.948	158712040	malate dehydrogenase	Perilla frutescens	Lamiaceae	carbohydrate metabolic process[GO:0005975] ; malate metabolic process[GO:0006108] ; tricarboxylic acid cycle[GO:0006099]	L-malate dehydrogenase activity[GO:0030060]	NA	map00630:Glyoxylate and dicarboxylate metabolism(dehydrogenase[ec:1.1.1.37]) ; map01130:Biosynthesis of antibiotics(dehydrogenase[ec:1.1.1.37]) ; map00720:Carbon fixation pathways in prokaryotes(dehydrogenase[ec:1.1.1.37]) ; map00020:Citrate cycle (TCA cycle)(dehydrogenase[ec:1.1.1.37]) ; map00620:Pyruvate metabolism(dehydrogenase[ec:1.1.1.37]) ; map00270:Cysteine and methionine metabolism(dehydr…
TR32829|c0_g4_i1	294	1.74911e-20	88	89.7373	158712040	malate dehydrogenase	Perilla frutescens	Lamiaceae	carbohydrate metabolic process[GO:0005975] ; malate metabolic process[GO:0006108] ; tricarboxylic acid cycle[GO:0006099]	L-malate dehydrogenase activity[GO:0030060]	NA	map00630:Glyoxylate and dicarboxylate metabolism(dehydrogenase[ec:1.1.1.37]) ; map01130:Biosynthesis of antibiotics(dehydrogenase[ec:1.1.1.37]) ; map00720:Carbon fixation pathways in prokaryotes(dehydrogenase[ec:1.1.1.37]) ; map00020:Citrate cycle (TCA cycle)(dehydrogenase[ec:1.1.1.37]) ; map00620:Pyruvate metabolism(dehydrogenase[ec:1.1.1.37]) ; map00270:Cysteine and methionine metabolism(dehydr…
TR32829|c0_g6_i1	367	5.37291e-15	92	75.8702	158712040	malate dehydrogenase	Perilla frutescens	Lamiaceae	carbohydrate metabolic process[GO:0005975] ; malate metabolic process[GO:0006108] ; tricarboxylic acid cycle[GO:0006099]	L-malate dehydrogenase activity[GO:0030060]	NA	map00630:Glyoxylate and dicarboxylate metabolism(dehydrogenase[ec:1.1.1.37]) ; map01130:Biosynthesis of antibiotics(dehydrogenase[ec:1.1.1.37]) ; map00720:Carbon fixation pathways in prokaryotes(dehydrogenase[ec:1.1.1.37]) ; map00020:Citrate cycle (TCA cycle)(dehydrogenase[ec:1.1.1.37]) ; map00620:Pyruvate metabolism(dehydrogenase[ec:1.1.1.37]) ; map00270:Cysteine and methionine metabolism(dehydr…
TR35827|c0_g3_i3	232	2.37454e-21	86	91.2781	159149180	ACC oxidase 2	Ziziphus jujuba	NA	oxidation-reduction process[GO:0055114]	metal ion binding[GO:0046872] ; oxidoreductase activity[GO:0016491]	NA	NA
TR36628|c1_g1_i2	1098	0	91	529.635	159792908	chloroplast tocopherol cyclase	Sesamum indicum	NA	metabolic process[GO:0008152]	tocopherol cyclase activity[GO:0009976]	NA	NA
TR36628|c1_g1_i6	1781	0	83	792.341	159792908	chloroplast tocopherol cyclase	Sesamum indicum	NA	metabolic process[GO:0008152]	tocopherol cyclase activity[GO:0009976]	NA	NA
TR36628|c1_g1_i4	447	2.46398e-73	87	236.113	159792908	chloroplast tocopherol cyclase	Sesamum indicum	NA	metabolic process[GO:0008152]	tocopherol cyclase activity[GO:0009976]	NA	NA
TR3971|c0_g1_i3	1310	1.37455e-126	82	376.711	162135178	stay green protein	Capsicum annuum	NA	NA	NA	NA	NA
TR38406|c3_g1_i1	500	1.36287e-119	99	346.665	162708014	actin	Ipomoea batatas	NA	NA	ATP binding[GO:0005524]	NA	NA
TR7830|c1_g5_i1	493	5.04551e-116	99	337.806	162708014	actin	Ipomoea batatas	NA	NA	ATP binding[GO:0005524]	NA	NA
TR41663|c2_g14_i1	230	9.96346e-41	100	137.117	163311870	chaperonin 60 beta subunit	Capsicum annuum	NA	NA	ATP binding[GO:0005524]	NA	NA
TR44100|c1_g4_i1	243	5.46238e-53	100	169.088	163676252	calcium-dependent protein kinase 2a	Vitis amurensis	NA	protein phosphorylation[GO:0006468]	protein kinase activity[GO:0004672] ; ATP binding[GO:0005524]	NA	NA
TR24715|c0_g2_i2	1187	1.01339e-10	47	68.1662	163889378	lectin	Medicago truncatula	NA	NA	NA	NA	NA
TR33439|c0_g5_i12	254	6.03852e-51	100	167.933	163914163	putative chloroplast chlorophyll a/b binding protein	Vitis hybrid cultivar	NA	photosynthesis, light harvesting[GO:0009765] ; protein-chromophore linkage[GO:0018298]	chlorophyll binding[GO:0016168]	photosystem II[GO:0009523] ; integral component of membrane[GO:0016021] ; chloroplast[GO:0009507]	NA
TR44892|c1_g3_i5	3273	0	78	1460.28	163955688	hypothetical protein	Vitis hybrid cultivar	NA	NA	binding[GO:0005488]	NA	NA
TR44892|c1_g3_i2	4185	0	78	1513.82	163955688	hypothetical protein	Vitis hybrid cultivar	NA	NA	binding[GO:0005488]	NA	NA
TR2839|c1_g1_i1	693	3.37403e-107	81	326.25	164457705	lignan glucosyltransferase	Sesamum radiatum	NA	metabolic process[GO:0008152]	transferase activity, transferring hexosyl groups[GO:0016758]	NA	NA
TR2839|c1_g2_i1	396	7.42853e-58	80	194.512	164457705	lignan glucosyltransferase	Sesamum radiatum	NA	metabolic process[GO:0008152]	transferase activity, transferring hexosyl groups[GO:0016758]	NA	NA
TR7362|c0_g1_i1	489	8.80452e-57	82	192.971	164457705	lignan glucosyltransferase	Sesamum radiatum	NA	metabolic process[GO:0008152]	transferase activity, transferring hexosyl groups[GO:0016758]	NA	NA
TR7362|c0_g1_i4	828	5.93482e-48	84	173.711	164457705	lignan glucosyltransferase	Sesamum radiatum	NA	metabolic process[GO:0008152]	transferase activity, transferring hexosyl groups[GO:0016758]	NA	NA
TR7362|c0_g1_i2	247	4.74902e-39	87	141.739	164457705	lignan glucosyltransferase	Sesamum radiatum	NA	metabolic process[GO:0008152]	transferase activity, transferring hexosyl groups[GO:0016758]	NA	NA
TR2839|c1_g3_i1	413	4.06339e-61	78	203.371	164457707	glucosyltransferase homolog	Antirrhinum majus	NA	NA	transferase activity, transferring glycosyl groups[GO:0016757]	NA	NA
TR41177|c0_g8_i2	488	1.12373e-101	96	304.679	164519779	nectar protein 1	Jacaranda mimosifolia	NA	metabolic process[GO:0008152]	hydrolase activity, acting on ester bonds[GO:0016788]	NA	NA
TR41177|c0_g4_i2	494	1.20928e-64	94	209.92	164519779	nectar protein 1	Jacaranda mimosifolia	NA	metabolic process[GO:0008152]	hydrolase activity, acting on ester bonds[GO:0016788]	NA	NA
TR41177|c0_g1_i1	276	6.42891e-49	95	166.007	164519779	nectar protein 1	Jacaranda mimosifolia	NA	metabolic process[GO:0008152]	hydrolase activity, acting on ester bonds[GO:0016788]	NA	NA
TR32724|c1_g1_i4	723	7.07713e-121	100	356.295	165761053	AChain A, Structure Of Eugenol Synthase From Ocimum Basilicum	Ocimum Basilicum	Lamiaceae	phenylpropanoid biosynthetic process[GO:0009699] ; oxidation-reduction process[GO:0055114]	oxidoreductase activity[GO:0016491]	NA	NA
TR32724|c1_g1_i1	339	1.75348e-49	100	167.933	165761065	AChain A, Structure Of Eugenol Synthase From Ocimum Basilicum Complexed With Emdf	Ocimum Basilicum	Lamiaceae	phenylpropanoid biosynthetic process[GO:0009699] ; oxidation-reduction process[GO:0055114]	oxidoreductase activity[GO:0016491]	NA	NA
TR33064|c0_g2_i5	666	6.52637e-105	98	310.842	166245158	cellulose synthase Z811	Zinnia elegans	NA	cellulose biosynthetic process[GO:0030244]	cellulose synthase (UDP-forming) activity[GO:0016760]	integral component of membrane[GO:0016021]	map00500:Starch and sucrose metabolism(synthase (UDP-forming)[ec:2.4.1.12])
TR38432|c0_g1_i1	324	2.13717e-35	100	125.176	166863145	proliferating cell nuclear antigen	Pinus taeda	NA	DNA replication[GO:0006260] ; regulation of DNA replication[GO:0006275]	DNA polymerase processivity factor activity[GO:0030337] ; DNA binding[GO:0003677]	nucleus[GO:0005634]	NA
TR8164|c0_g2_i4	902	5.19307e-168	97	492.656	166919372	chloroplast heat shock protein 70-2	Ipomoea nil	NA	protein folding[GO:0006457]	ATP binding[GO:0005524] ; unfolded protein binding[GO:0051082]	NA	NA
TR27627|c1_g1_i8	994	3.02521e-133	85	394.815	167178664	class 1 knox protein	Kalanchoe x houghtonii	NA	regulation of transcription, DNA-templated[GO:0006355]	DNA binding[GO:0003677]	nucleus[GO:0005634]	NA
TR27627|c1_g1_i3	1322	3.32131e-132	84	396.356	167178664	class 1 knox protein	Kalanchoe x houghtonii	NA	regulation of transcription, DNA-templated[GO:0006355]	DNA binding[GO:0003677]	nucleus[GO:0005634]	NA
TR39746|c0_g1_i5	1808	8.17243e-119	61	370.163	168006109	predicted protein	Physcomitrella patens	NA	NA	NA	NA	NA
TR32745|c0_g2_i2	1414	0	99	809.675	168049259	predicted protein	Physcomitrella patens	NA	microtubule-based process[GO:0007017] ; metabolic process[GO:0008152]	structural constituent of cytoskeleton[GO:0005200] ; GTP binding[GO:0005525] ; GTPase activity[GO:0003924]	microtubule[GO:0005874]	NA
TR33304|c0_g3_i2	598	3.35458e-48	91	162.155	168415058	chaperonin 60 alpha subunit	Arachis diogoi	NA	NA	ATP binding[GO:0005524]	NA	NA
TR33304|c0_g5_i1	241	1.80582e-31	88	114.39	168415058	chaperonin 60 alpha subunit	Arachis diogoi	NA	NA	ATP binding[GO:0005524]	NA	NA
TR43378|c3_g2_i1	278	3.27494e-58	96	188.348	168812265	cullin 1	Vitis vinifera	NA	ubiquitin-dependent protein catabolic process[GO:0006511]	ubiquitin protein ligase binding[GO:0031625]	NA	NA
TR39540|c1_g1_i3	571	7.48387e-70	96	221.476	169160088	class 1 KNOX protein, partial	Corytoplectus speciosus	NA	regulation of transcription, DNA-templated[GO:0006355]	sequence-specific DNA binding[GO:0043565]	nucleus[GO:0005634]	NA
TR3544|c0_g3_i1	225	2.69573e-45	98	148.673	169261114	chloroplast acetolactate synthase	Oenothera elata subsp. hookeri	NA	NA	thiamine pyrophosphate binding[GO:0030976]	NA	NA
TR35587|c1_g2_i1	260	6.254e-49	96	163.696	169642805	phenylalanine ammonia-lyase 3	Cynara cardunculus var. scolymus	NA	metabolic process[GO:0008152]	ammonia-lyase activity[GO:0016841]	NA	NA
TR40485|c0_g1_i5	638	1.7153e-142	98	416.772	169667305	cytochrome P450 monooxygenase CS3`H	Salvia miltiorrhiza	NA	oxidation-reduction process[GO:0055114]	heme binding[GO:0020037] ; oxidoreductase activity, acting on paired donors, with incorporation or reduction of molecular oxygen[GO:0016705] ; monooxygenase activity[GO:0004497] ; iron ion binding[GO:0005506]	NA	NA
TR34916|c0_g3_i3	713	7.91274e-116	97	347.051	169667311	hydroxycinnamoyl-CoA shikimate/quinate hydroxycinnamoyltransferase	Salvia miltiorrhiza	NA	metabolic process[GO:0008152]	transferase activity, transferring acyl groups other than amino-acyl groups[GO:0016747]	NA	NA
TR42799|c1_g2_i1	279	7.08578e-56	98	178.333	170677260	AFB3	Arabidopsis thaliana	NA	NA	NA	NA	NA
TR7812|c2_g3_i1	229	1.49386e-31	100	113.235	171187598	glyceraldehyde 3-phosphate dehydrogenase	Manihot pilosa	NA	oxidation-reduction process[GO:0055114]	oxidoreductase activity, acting on the aldehyde or oxo group of donors, NAD or NADP as acceptor[GO:0016620]	NA	NA
TR34715|c0_g1_i1	1471	0	84	609.372	171190282	homogentisic acid phytyltransferase	Sesamum indicum	NA	metabolic process[GO:0008152]	prenyltransferase activity[GO:0004659]	integral component of membrane[GO:0016021]	NA
TR42641|c0_g13_i1	224	2.12771e-41	97	139.813	183211708	At1G15690-like protein	Arabidopsis lyrata subsp. lyrata	NA	metabolic process[GO:0008152] ; proton transport[GO:0015992] ; transmembrane transport[GO:0055085]	inorganic diphosphatase activity[GO:0004427] ; hydrogen-translocating pyrophosphatase activity[GO:0009678]	integral component of membrane[GO:0016021]	map00190:Oxidative phosphorylation(diphosphatase[ec:3.6.1.1])
TR42297|c2_g1_i1	224	3.27536e-44	94	146.747	183211824	At3G60750-like protein	Arabidopsis lyrata subsp. petraea	NA	NA	NA	NA	NA
TR39443|c0_g1_i1	1156	0	95	666.381	183397343	UDP-glucose pyrophosphorylase	Paulownia sp. ZKC-2008	NA	UDP-glucose metabolic process[GO:0006011]	UTP:glucose-1-phosphate uridylyltransferase activity[GO:0003983]	NA	map00500:Starch and sucrose metabolism(uridylyltransferase[ec:2.7.7.9]) ; map01130:Biosynthesis of antibiotics(uridylyltransferase[ec:2.7.7.9]) ; map00052:Galactose metabolism(uridylyltransferase[ec:2.7.7.9]) ; map00520:Amino sugar and nucleotide sugar metabolism(uridylyltransferase[ec:2.7.7.9]) ; map00040:Pentose and glucuronate interconversions(uridylyltransferase[ec:2.7.7.9])
TR39443|c0_g3_i1	351	1.506e-12	97	69.707	183397343	UDP-glucose pyrophosphorylase	Paulownia sp. ZKC-2008	NA	UDP-glucose metabolic process[GO:0006011]	UTP:glucose-1-phosphate uridylyltransferase activity[GO:0003983]	NA	map00500:Starch and sucrose metabolism(uridylyltransferase[ec:2.7.7.9]) ; map01130:Biosynthesis of antibiotics(uridylyltransferase[ec:2.7.7.9]) ; map00052:Galactose metabolism(uridylyltransferase[ec:2.7.7.9]) ; map00520:Amino sugar and nucleotide sugar metabolism(uridylyltransferase[ec:2.7.7.9]) ; map00040:Pentose and glucuronate interconversions(uridylyltransferase[ec:2.7.7.9])
TR41164|c0_g4_i3	1165	0	96	679.478	183579831	putative cytochrome P450	Solenostemon scutellarioides	NA	oxidation-reduction process[GO:0055114]	heme binding[GO:0020037] ; oxidoreductase activity, acting on paired donors, with incorporation or reduction of molecular oxygen[GO:0016705] ; monooxygenase activity[GO:0004497] ; iron ion binding[GO:0005506]	integral component of membrane[GO:0016021]	NA
TR27146|c0_g1_i1	1289	0	98	824.313	183579831	putative cytochrome P450	Solenostemon scutellarioides	NA	oxidation-reduction process[GO:0055114]	heme binding[GO:0020037] ; oxidoreductase activity, acting on paired donors, with incorporation or reduction of molecular oxygen[GO:0016705] ; monooxygenase activity[GO:0004497] ; iron ion binding[GO:0005506]	integral component of membrane[GO:0016021]	NA
TR41164|c0_g4_i2	589	1.7655e-130	97	385.571	183579831	putative cytochrome P450	Solenostemon scutellarioides	NA	oxidation-reduction process[GO:0055114]	heme binding[GO:0020037] ; oxidoreductase activity, acting on paired donors, with incorporation or reduction of molecular oxygen[GO:0016705] ; monooxygenase activity[GO:0004497] ; iron ion binding[GO:0005506]	integral component of membrane[GO:0016021]	NA
TR41164|c0_g6_i1	544	1.57727e-124	98	369.777	183579831	putative cytochrome P450	Solenostemon scutellarioides	NA	oxidation-reduction process[GO:0055114]	heme binding[GO:0020037] ; oxidoreductase activity, acting on paired donors, with incorporation or reduction of molecular oxygen[GO:0016705] ; monooxygenase activity[GO:0004497] ; iron ion binding[GO:0005506]	integral component of membrane[GO:0016021]	NA
TR41164|c0_g3_i1	434	3.70711e-90	95	279.641	183579831	putative cytochrome P450	Solenostemon scutellarioides	NA	oxidation-reduction process[GO:0055114]	heme binding[GO:0020037] ; oxidoreductase activity, acting on paired donors, with incorporation or reduction of molecular oxygen[GO:0016705] ; monooxygenase activity[GO:0004497] ; iron ion binding[GO:0005506]	integral component of membrane[GO:0016021]	NA
TR41164|c0_g7_i3	371	2.25772e-78	97	248.44	183579831	putative cytochrome P450	Solenostemon scutellarioides	NA	oxidation-reduction process[GO:0055114]	heme binding[GO:0020037] ; oxidoreductase activity, acting on paired donors, with incorporation or reduction of molecular oxygen[GO:0016705] ; monooxygenase activity[GO:0004497] ; iron ion binding[GO:0005506]	integral component of membrane[GO:0016021]	NA
TR41164|c0_g1_i1	350	2.76227e-73	96	234.958	183579831	putative cytochrome P450	Solenostemon scutellarioides	NA	oxidation-reduction process[GO:0055114]	heme binding[GO:0020037] ; oxidoreductase activity, acting on paired donors, with incorporation or reduction of molecular oxygen[GO:0016705] ; monooxygenase activity[GO:0004497] ; iron ion binding[GO:0005506]	integral component of membrane[GO:0016021]	NA
TR41164|c0_g5_i1	335	6.40901e-73	99	233.802	183579831	putative cytochrome P450	Solenostemon scutellarioides	NA	oxidation-reduction process[GO:0055114]	heme binding[GO:0020037] ; oxidoreductase activity, acting on paired donors, with incorporation or reduction of molecular oxygen[GO:0016705] ; monooxygenase activity[GO:0004497] ; iron ion binding[GO:0005506]	integral component of membrane[GO:0016021]	NA
TR41164|c0_g4_i4	260	6.83046e-52	100	177.178	183579831	putative cytochrome P450	Solenostemon scutellarioides	NA	oxidation-reduction process[GO:0055114]	heme binding[GO:0020037] ; oxidoreductase activity, acting on paired donors, with incorporation or reduction of molecular oxygen[GO:0016705] ; monooxygenase activity[GO:0004497] ; iron ion binding[GO:0005506]	integral component of membrane[GO:0016021]	NA
TR41164|c0_g7_i2	252	8.98978e-48	95	166.007	183579831	putative cytochrome P450	Solenostemon scutellarioides	NA	oxidation-reduction process[GO:0055114]	heme binding[GO:0020037] ; oxidoreductase activity, acting on paired donors, with incorporation or reduction of molecular oxygen[GO:0016705] ; monooxygenase activity[GO:0004497] ; iron ion binding[GO:0005506]	integral component of membrane[GO:0016021]	NA
TR41164|c0_g7_i1	401	2.00759e-38	97	142.51	183579831	putative cytochrome P450	Solenostemon scutellarioides	NA	oxidation-reduction process[GO:0055114]	heme binding[GO:0020037] ; oxidoreductase activity, acting on paired donors, with incorporation or reduction of molecular oxygen[GO:0016705] ; monooxygenase activity[GO:0004497] ; iron ion binding[GO:0005506]	integral component of membrane[GO:0016021]	NA
TR31057|c0_g2_i1	294	1.87264e-68	98	218.009	183584854	MAP kinase	Gossypium raimondii	NA	MAPK cascade[GO:0000165]	MAP kinase activity[GO:0004707] ; ATP binding[GO:0005524]	intracellular[GO:0005622]	map04150:mTOR signaling pathway(protein kinase[ec:2.7.11.24])
TR38895|c0_g5_i1	225	1.1998e-51	100	173.326	183584854	MAP kinase	Gossypium raimondii	NA	MAPK cascade[GO:0000165]	MAP kinase activity[GO:0004707] ; ATP binding[GO:0005524]	intracellular[GO:0005622]	map04150:mTOR signaling pathway(protein kinase[ec:2.7.11.24])
TR24189|c0_g2_i4	2482	9.73727e-08	73	54.299	186478270	atypical CYS HIS rich thioredoxin 4	Arabidopsis thaliana	NA	NA	oxidoreductase activity, acting on a sulfur group of donors, disulfide as acceptor[GO:0016671]	chloroplast membrane[GO:0031969] ; chloroplast stroma[GO:0009570]	NA
TR3685|c1_g1_i7	612	1.75906e-06	70	42.3578	187369554	RIN-like MADS-box protein	Torenia fournieri	NA	NA	NA	NA	NA
TR32486|c2_g1_i1	422	8.71091e-84	96	257.684	187609478	cinnamoyl-CoA reductase	Paulownia sp. ZKC-2008	NA	metabolic process[GO:0008152]	coenzyme binding[GO:0050662] ; catalytic activity[GO:0003824]	NA	NA
TR32116|c0_g1_i1	1513	0	82	659.833	187761621	UGT88A7	Perilla frutescens	Lamiaceae	metabolic process[GO:0008152]	transferase activity, transferring hexosyl groups[GO:0016758]	NA	NA
TR32116|c0_g1_i2	693	6.53815e-92	82	286.96	187761621	UGT88A7	Perilla frutescens	Lamiaceae	metabolic process[GO:0008152]	transferase activity, transferring hexosyl groups[GO:0016758]	NA	NA
TR38657|c0_g9_i2	568	1.12057e-19	79	92.0485	187761621	UGT88A7	Perilla frutescens	Lamiaceae	metabolic process[GO:0008152]	transferase activity, transferring hexosyl groups[GO:0016758]	NA	NA
TR39204|c0_g2_i3	1442	0	86	689.493	187761625	UGT73A7	Perilla frutescens	Lamiaceae	metabolic process[GO:0008152]	transferase activity, transferring hexosyl groups[GO:0016758]	NA	NA
TR39204|c0_g2_i4	645	7.85527e-91	87	284.648	187761625	UGT73A7	Perilla frutescens	Lamiaceae	metabolic process[GO:0008152]	transferase activity, transferring hexosyl groups[GO:0016758]	NA	NA
TR39929|c0_g1_i1	1934	0	98	1002.66	187884600	3-hydroxy-3-methylglutaryl-coenzyme A reductase	Salvia miltiorrhiza	NA	coenzyme A metabolic process[GO:0015936] ; oxidation-reduction process[GO:0055114] ; isoprenoid biosynthetic process[GO:0008299]	hydroxymethylglutaryl-CoA reductase (NADPH) activity[GO:0004420] ; NADP binding[GO:0050661]	integral component of membrane[GO:0016021] ; endoplasmic reticulum membrane[GO:0005789]	map01130:Biosynthesis of antibiotics(reductase (NADPH)[ec:1.1.1.34]) ; map00900:Terpenoid backbone biosynthesis(reductase (NADPH)[ec:1.1.1.34])
TR2973|c0_g1_i1	375	6.67006e-21	57	93.9745	187940736	BEL29 protein	Solanum etuberosum	NA	NA	NA	NA	NA
TR2973|c0_g2_i1	236	2.83679e-20	80	90.1225	187940736	BEL29 protein	Solanum etuberosum	NA	regulation of transcription, DNA-templated[GO:0006355]	DNA binding[GO:0003677]	nucleus[GO:0005634]	NA
TR28134|c0_g1_i2	1220	1.57403e-58	55	142.51	188011481	beta-1,3-glucanase	Vitis riparia	NA	NA	NA	NA	NA
TR29138|c1_g1_i1	568	9.13754e-49	69	169.859	188011481	beta-1,3-glucanase	Vitis riparia	NA	NA	hydrolase activity[GO:0016787]	NA	NA
TR39604|c2_g1_i3	298	3.23709e-62	95	195.282	189085719	phototropin 2	Verbena perennis	NA	phosphorelay signal transduction system[GO:0000160] ; signal transduction by protein phosphorylation[GO:0023014]	phosphorelay sensor kinase activity[GO:0000155]	intracellular[GO:0005622]	NA
TR40985|c0_g1_i11	389	1.72382e-83	98	251.906	190895852	expressed protein	Populus tremula	NA	pentose-phosphate shunt[GO:0006098] ; oxidation-reduction process[GO:0055114]	phosphogluconate dehydrogenase (decarboxylating) activity[GO:0004616]	NA	map00480:Glutathione metabolism(dehydrogenase (NADP+-dependent, decarboxylating)[ec:1.1.1.44]) ; map00030:Pentose phosphate pathway(dehydrogenase (NADP+-dependent, decarboxylating)[ec:1.1.1.44]) ; map01130:Biosynthesis of antibiotics(dehydrogenase (NADP+-dependent, decarboxylating)[ec:1.1.1.44])
TR40485|c0_g2_i5	242	2.67973e-49	96	161.77	190896814	cytochrome P450	Populus tremula	NA	oxidation-reduction process[GO:0055114]	heme binding[GO:0020037] ; oxidoreductase activity, acting on paired donors, with incorporation or reduction of molecular oxygen[GO:0016705] ; monooxygenase activity[GO:0004497] ; iron ion binding[GO:0005506]	NA	NA
TR29299|c0_g2_i1	328	3.42303e-63	91	199.134	190898684	fatty acid desaturase	Populus tremula	NA	lipid metabolic process[GO:0006629]	NA	integral component of membrane[GO:0016021]	NA
TR33320|c0_g1_i2	729	1.00546e-95	88	293.508	193290666	putative branched-chain alpha-keto acid dehydrogenase E1 beta subunit	Capsicum annuum	NA	metabolic process[GO:0008152]	catalytic activity[GO:0003824]	NA	NA
TR42669|c0_g2_i2	1562	0	97	705.286	193792541	1-deoxy-D-xylulose 5-phosphate synthase	Salvia miltiorrhiza	NA	terpenoid biosynthetic process[GO:0016114]	1-deoxy-D-xylulose-5-phosphate synthase activity[GO:0008661]	NA	map00730:Thiamine metabolism(synthase[ec:2.2.1.7]) ; map01130:Biosynthesis of antibiotics(synthase[ec:2.2.1.7]) ; map00900:Terpenoid backbone biosynthesis(synthase[ec:2.2.1.7])
TR40145|c0_g1_i1	293	3.25097e-24	97	95.5153	194466105	putative endosomal protein	Arachis hypogaea	NA	NA	NA	integral component of membrane[GO:0016021]	NA
TR2261|c0_g1_i1	400	1.18465e-33	98	122.865	194466205	putative L24 ribosomal protein	Arachis hypogaea	NA	translation[GO:0006412]	structural constituent of ribosome[GO:0003735]	large ribosomal subunit[GO:0015934]	NA
TR2261|c0_g4_i1	233	1.18877e-22	98	92.0485	194466205	putative L24 ribosomal protein	Arachis hypogaea	NA	translation[GO:0006412]	structural constituent of ribosome[GO:0003735]	large ribosomal subunit[GO:0015934]	NA
TR37113|c0_g2_i1	432	4.42125e-40	94	137.887	194691196	unknown	Zea mays	NA	cell redox homeostasis[GO:0045454] ; oxidation-reduction process[GO:0055114]	flavin adenine dinucleotide binding[GO:0050660] ; oxidoreductase activity[GO:0016491]	cell[GO:0005623]	NA
TR33442|c0_g3_i1	236	3.45372e-52	100	167.548	194692808	unknown	Zea mays	NA	nucleocytoplasmic transport[GO:0006913] ; intracellular protein transport[GO:0006886] ; metabolic process[GO:0008152] ; small GTPase mediated signal transduction[GO:0007264]	GTP binding[GO:0005525] ; GTPase activity[GO:0003924]	intracellular[GO:0005622] ; membrane[GO:0016020]	NA
TR28108|c0_g1_i1	281	6.99716e-60	98	189.504	194695016	unknown	Zea mays	NA	NA	GTP binding[GO:0005525]	NA	NA
TR42631|c0_g8_i1	248	1.34985e-38	100	136.346	194695024	unknown	Zea mays	NA	NA	ATP binding[GO:0005524]	NA	NA
TR32504|c1_g1_i1	391	4.76257e-19	97	82.8037	194698452	unknown	Zea mays	NA	NA	NA	NA	NA
TR29828|c3_g2_i1	449	1.75058e-106	98	310.457	194698876	unknown	Zea mays	NA	microtubule-based process[GO:0007017] ; metabolic process[GO:0008152]	structural constituent of cytoskeleton[GO:0005200] ; GTP binding[GO:0005525] ; GTPase activity[GO:0003924]	cytoplasm[GO:0005737] ; microtubule[GO:0005874]	NA
TR40464|c2_g1_i1	341	4.50027e-80	100	241.891	194698876	unknown	Zea mays	NA	microtubule-based process[GO:0007017] ; metabolic process[GO:0008152]	structural constituent of cytoskeleton[GO:0005200] ; GTP binding[GO:0005525] ; GTPase activity[GO:0003924]	cytoplasm[GO:0005737] ; microtubule[GO:0005874]	NA
TR2244|c1_g1_i8	254	4.41406e-31	91	115.546	194701054	unknown	Zea mays	NA	metabolic process[GO:0008152]	catalytic activity[GO:0003824]	NA	NA
TR7354|c0_g3_i5	317	7.0182e-13	75	69.707	194701750	unknown	Zea mays	NA	glycosyl compound metabolic process[GO:1901657] ; pyruvate metabolic process[GO:0006090] ; single-organism catabolic process[GO:0044712] ; organic substance biosynthetic process[GO:1901576] ; phosphate-containing compound metabolic process[GO:0006796] ; organophosphate metabolic process[GO:0019637] ; sulfur compound metabolic process[GO:0006790] ; single-organism biosynthetic process[GO:0044711] …	catalytic activity[GO:0003824]	intracellular membrane-bounded organelle[GO:0043231] ; cytoplasmic part[GO:0044444]	NA
TR39562|c2_g3_i3	387	5.76799e-23	100	93.9745	194705234	unknown	Zea mays	NA	metabolic process[GO:0008152]	nucleic acid binding[GO:0003676] ; ATP binding[GO:0005524] ; helicase activity[GO:0004386]	NA	NA
TR43237|c3_g2_i1	239	9.90019e-45	93	148.673	194709097	AChain A, Crystal Structure Of Lov1 Domain Of Phototropin2 From Arabidopsis Thaliana	Arabidopsis thaliana	NA	NA	NA	NA	NA
TR2521|c0_g1_i1	305	1.04054e-49	81	162.925	195606300	ubiquitin-conjugating enzyme E2-17 kDa	Zea mays	NA	metabolic process[GO:0008152]	ATP binding[GO:0005524] ; ligase activity[GO:0016874]	NA	NA
TR17067|c0_g1_i1	288	1.62475e-36	96	127.872	195617402	60S ribosomal protein L34	Zea mays	NA	translation[GO:0006412]	structural constituent of ribosome[GO:0003735]	ribosome[GO:0005840]	NA
TR2750|c4_g7_i2	281	8.85913e-58	100	182.956	195617694	histone H4	Zea mays	NA	nucleosome assembly[GO:0006334]	DNA binding[GO:0003677] ; protein heterodimerization activity[GO:0046982]	nucleosome[GO:0000786] ; nucleus[GO:0005634]	NA
TR32959|c2_g5_i8	480	1.13449e-56	100	182.956	195617694	histone H4	Zea mays	NA	nucleosome assembly[GO:0006334]	DNA binding[GO:0003677] ; protein heterodimerization activity[GO:0046982]	nucleosome[GO:0000786] ; nucleus[GO:0005634]	NA
TR2750|c2_g1_i2	251	3.94807e-51	100	165.622	195617694	histone H4	Zea mays	NA	nucleosome assembly[GO:0006334]	DNA binding[GO:0003677] ; protein heterodimerization activity[GO:0046982]	nucleosome[GO:0000786] ; nucleus[GO:0005634]	NA
TR32959|c0_g1_i3	571	2.54937e-50	100	167.933	195617694	histone H4	Zea mays	NA	nucleosome assembly[GO:0006334]	DNA binding[GO:0003677] ; protein heterodimerization activity[GO:0046982]	nucleosome[GO:0000786] ; nucleus[GO:0005634]	NA
TR30240|c3_g3_i5	538	9.3195e-50	100	166.007	195617694	histone H4	Zea mays	NA	nucleosome assembly[GO:0006334]	DNA binding[GO:0003677] ; protein heterodimerization activity[GO:0046982]	nucleosome[GO:0000786] ; nucleus[GO:0005634]	NA
TR2750|c4_g3_i5	424	9.87765e-46	76	154.451	195617694	histone H4	Zea mays	NA	NA	binding[GO:0005488]	chromosome[GO:0005694]	NA
TR7623|c0_g2_i1	320	1.64167e-18	100	80.1073	195657895	hypothetical protein	Zea mays	NA	NA	NA	NA	NA
TR30202|c0_g5_i6	733	3.85752e-121	100	353.599	196166896	translation elongation factor 1, partial	Ziziphus jujuba	NA	translational elongation[GO:0006414]	translation elongation factor activity[GO:0003746] ; GTP binding[GO:0005525] ; GTPase activity[GO:0003924]	NA	NA
TR30202|c0_g5_i11	594	8.0552e-118	100	343.199	196166896	translation elongation factor 1, partial	Ziziphus jujuba	NA	translational elongation[GO:0006414]	translation elongation factor activity[GO:0003746] ; GTP binding[GO:0005525] ; GTPase activity[GO:0003924]	NA	NA
TR30202|c0_g5_i10	693	7.73629e-117	99	342.043	196166896	translation elongation factor 1, partial	Ziziphus jujuba	NA	translational elongation[GO:0006414]	translation elongation factor activity[GO:0003746] ; GTP binding[GO:0005525] ; GTPase activity[GO:0003924]	NA	NA
TR7830|c1_g5_i3	340	1.15544e-75	100	230.72	197244661	actin like protein	Hydrangea macrophylla	NA	NA	NA	NA	NA
TR37723|c0_g8_i1	225	2.42621e-42	96	142.51	197293837	beta-cyanoalanine synthase 1, partial	Prunus dulcis	NA	cysteine biosynthetic process from serine[GO:0006535] ; cyanide metabolic process[GO:0019499]	cysteine synthase activity[GO:0004124] ; L-3-cyanoalanine synthase activity[GO:0050017]	mitochondrion[GO:0005739]	map00920:Sulfur metabolism(synthase[ec:2.5.1.47]) ; map01130:Biosynthesis of antibiotics(synthase[ec:2.5.1.47]) ; map00460:Cyanoamino acid metabolism(synthase[ec:4.4.1.9]) ; map00270:Cysteine and methionine metabolism(synthase[ec:2.5.1.47])
TR35804|c0_g2_i6	1008	4.74709e-112	90	334.724	197723812	small basic intrinsic protein 1-2	Olea europaea	NA	transport[GO:0006810]	transporter activity[GO:0005215]	integral component of membrane[GO:0016021]	NA
TR2732|c2_g1_i2	257	1.51556e-14	86	72.0182	197723812	small basic intrinsic protein 1-2	Olea europaea	NA	transport[GO:0006810]	transporter activity[GO:0005215]	integral component of membrane[GO:0016021]	NA
TR39822|c0_g3_i5	403	3.64714e-74	94	227.639	206204879	kinase-like protein pac.pt.5.103	Platanus x acerifolia	NA	protein phosphorylation[GO:0006468]	protein kinase activity[GO:0004672] ; ATP binding[GO:0005524]	NA	NA
TR23856|c0_g1_i1	516	4.25123e-55	84	178.718	208659912	TRX	Salvia miltiorrhiza	NA	cell redox homeostasis[GO:0045454] ; glycerol ether metabolic process[GO:0006662] ; oxidation-reduction process[GO:0055114]	protein disulfide oxidoreductase activity[GO:0015035]	cell[GO:0005623]	NA
TR32641|c1_g1_i1	224	1.91106e-36	87	126.716	208659912	TRX	Salvia miltiorrhiza	NA	cell redox homeostasis[GO:0045454] ; glycerol ether metabolic process[GO:0006662] ; oxidation-reduction process[GO:0055114]	protein disulfide oxidoreductase activity[GO:0015035]	cell[GO:0005623]	NA
TR27815|c2_g1_i1	351	2.48733e-60	97	192.586	208964728	S-adenosyl homocysteine hydrolase	Nicotiana benthamiana	NA	one-carbon metabolic process[GO:0006730]	adenosylhomocysteinase activity[GO:0004013]	NA	map00270:Cysteine and methionine metabolism(S-adenosylhomocysteine synthase[ec:3.3.1.1])
TR44002|c0_g4_i4	548	1.47901e-113	93	330.872	209408512	TOM1 protein	Nicotiana benthamiana	NA	NA	NA	integral component of membrane[GO:0016021]	NA
TR26187|c0_g2_i1	449	7.45905e-40	84	137.887	209419738	auxin response factor 8	Solanum lycopersicum	NA	auxin-activated signaling pathway[GO:0009734] ; regulation of transcription, DNA-templated[GO:0006355] ; transcription, DNA-templated[GO:0006351]	NA	nucleus[GO:0005634]	NA
TR28154|c0_g1_i2	678	1.065e-84	87	257.684	209571719	late embryogenesis-like protein	Salvia miltiorrhiza	NA	response to desiccation[GO:0009269]	NA	NA	NA
TR29479|c0_g2_i5	760	1.06581e-60	81	197.593	209571719	late embryogenesis-like protein	Salvia miltiorrhiza	NA	response to desiccation[GO:0009269]	NA	NA	NA
TR29479|c0_g2_i3	1171	1.76746e-59	81	199.134	209571719	late embryogenesis-like protein	Salvia miltiorrhiza	NA	response to desiccation[GO:0009269]	NA	NA	NA
TR28729|c0_g2_i1	416	1.45243e-46	84	156.762	209571719	late embryogenesis-like protein	Salvia miltiorrhiza	NA	response to desiccation[GO:0009269]	NA	NA	NA
TR32289|c0_g1_i10	1487	1.39024e-142	63	430.639	209867508	WRKY transcription factor	Picrorhiza kurrooa	NA	NA	NA	NA	NA
TR32289|c0_g1_i17	1588	4.20383e-128	68	394.43	209867508	WRKY transcription factor	Picrorhiza kurrooa	NA	NA	NA	NA	NA
TR7718|c0_g2_i2	309	2.0945e-30	78	117.087	209968797	indole-3-glycerol phosphate lyase IGL1	Lamium galeobdolon	Lamiaceae	tryptophan metabolic process[GO:0006568]	lyase activity[GO:0016829]	NA	NA
TR41493|c0_g5_i2	620	2.24435e-55	94	185.652	210112067	unknown	Litchi chinensis	NA	NA	NA	integral component of membrane[GO:0016021]	NA
TR2429|c0_g1_i1	452	6.61715e-96	98	291.582	211906450	phosphoglycerate kinase	Gossypium hirsutum	NA	glycolytic process[GO:0006096]	phosphoglycerate kinase activity[GO:0004618] ; ATP binding[GO:0005524]	NA	map01130:Biosynthesis of antibiotics(kinase[ec:2.7.2.3]) ; map00710:Carbon fixation in photosynthetic organisms(kinase[ec:2.7.2.3]) ; map00010:Glycolysis / Gluconeogenesis(kinase[ec:2.7.2.3])
TR43699|c2_g1_i3	580	3.61881e-73	96	226.868	212721470	uncharacterized protein LOC100192843	Zea mays	NA	ubiquitin-dependent protein catabolic process[GO:0006511]	ubiquitin protein ligase binding[GO:0031625]	cullin-RING ubiquitin ligase complex[GO:0031461]	NA
TR43179|c2_g15_i1	227	1.87135e-26	97	102.834	212723612	uncharacterized protein LOC100193888	Zea mays	NA	regulation of transcription, DNA-templated[GO:0006355]	NA	NA	NA
TR31615|c0_g3_i1	392	4.59759e-47	91	160.229	214011474	oxygen-evolving enhancer protein 3	Glycine max	NA	photosynthesis[GO:0015979]	calcium ion binding[GO:0005509]	photosystem II oxygen evolving complex[GO:0009654] ; extrinsic component of membrane[GO:0019898]	NA
TR43139|c1_g1_i1	231	2.86836e-37	93	135.961	215272285	indole-3-acetamide hydrolase	Nicotiana tabacum	NA	metabolic process[GO:0008152]	carbon-nitrogen ligase activity, with glutamine as amido-N-donor[GO:0016884] ; hydrolase activity[GO:0016787]	NA	NA
TR39791|c0_g6_i1	273	1.01429e-58	98	186.037	217069848	unknown	Medicago truncatula	NA	protein phosphorylation[GO:0006468]	protein kinase activity[GO:0004672] ; ATP binding[GO:0005524]	NA	NA
TR7927|c3_g1_i1	421	2.50752e-10	80	59.6918	217070416	unknown	Medicago truncatula	NA	NA	NA	NA	NA
TR32327|c0_g1_i2	522	4.74173e-15	86	74.3294	217070770	unknown	Medicago truncatula	NA	oxidation-reduction process[GO:0055114]	zinc ion binding[GO:0008270] ; oxidoreductase activity[GO:0016491]	NA	NA
TR43191|c2_g1_i1	245	3.72544e-44	95	151.754	217070782	unknown	Medicago truncatula	NA	oxidation-reduction process[GO:0055114]	oxidoreductase activity[GO:0016491] ; copper ion binding[GO:0005507]	NA	NA
TR3304|c0_g3_i1	244	5.1464e-37	100	128.257	217071182	unknown	Medicago truncatula	NA	translation[GO:0006412]	structural constituent of ribosome[GO:0003735]	ribosome[GO:0005840]	NA
TR3304|c0_g7_i2	429	8.23599e-36	100	127.872	217071182	unknown	Medicago truncatula	NA	translation[GO:0006412]	structural constituent of ribosome[GO:0003735]	ribosome[GO:0005840]	NA
TR33329|c0_g2_i3	305	6.66289e-08	63	53.1434	217071228	unknown	Medicago truncatula	NA	NA	NA	NA	NA
TR29274|c3_g2_i2	259	7.76901e-17	100	76.2554	217071314	unknown	Medicago truncatula	NA	translation[GO:0006412]	structural constituent of ribosome[GO:0003735]	ribosome[GO:0005840]	NA
TR36477|c0_g7_i1	299	1.06513e-57	92	182.956	217071476	unknown	Medicago truncatula	NA	actin filament depolymerization[GO:0030042]	actin binding[GO:0003779]	actin cytoskeleton[GO:0015629]	NA
TR3909|c1_g3_i1	239	8.09419e-34	98	120.939	217071662	unknown	Medicago truncatula	NA	NA	RNA binding[GO:0003723]	ribosome[GO:0005840]	NA
TR42081|c1_g8_i2	602	9.35069e-94	99	280.411	217071958	unknown	Medicago truncatula	NA	protein phosphorylation[GO:0006468]	ATP binding[GO:0005524] ; protein serine/threonine kinase activity[GO:0004674]	NA	NA
TR42081|c1_g8_i1	674	9.00904e-56	77	184.496	217071958	unknown	Medicago truncatula	NA	NA	protein kinase activity[GO:0004672] ; nucleotide binding[GO:0000166]	NA	NA
TR33606|c1_g5_i1	239	8.56422e-35	97	122.094	217072986	unknown	Medicago truncatula	NA	NA	NA	NA	NA
TR40479|c0_g4_i2	335	8.14965e-36	100	132.494	217073071	unknown	Medicago truncatula	NA	protein folding[GO:0006457]	unfolded protein binding[GO:0051082]	NA	NA
TR36633|c0_g5_i7	359	3.95103e-55	96	179.104	217073586	unknown	Medicago truncatula	NA	NA	DNA binding[GO:0003677]	NA	NA
TR38134|c1_g4_i1	263	3.33658e-54	100	176.792	217074040	unknown	Medicago truncatula	NA	chlorophyll biosynthetic process[GO:0015995] ; photosynthesis[GO:0015979] ; oxidation-reduction process[GO:0055114]	metal ion binding[GO:0046872] ; magnesium-protoporphyrin IX monomethyl ester (oxidative) cyclase activity[GO:0048529]	NA	map00860:Porphyrin and chlorophyll metabolism(IX monomethyl ester (oxidative) cyclase[ec:1.14.13.81])
TR38134|c1_g2_i1	229	6.93809e-48	100	160.229	217074040	unknown	Medicago truncatula	NA	chlorophyll biosynthetic process[GO:0015995] ; photosynthesis[GO:0015979] ; oxidation-reduction process[GO:0055114]	metal ion binding[GO:0046872] ; magnesium-protoporphyrin IX monomethyl ester (oxidative) cyclase activity[GO:0048529]	NA	map00860:Porphyrin and chlorophyll metabolism(IX monomethyl ester (oxidative) cyclase[ec:1.14.13.81])
TR21300|c0_g1_i2	402	2.3653e-25	100	102.449	217074106	unknown	Medicago truncatula	NA	dephosphorylation[GO:0016311] ; carbohydrate metabolic process[GO:0005975]	fructose 1,6-bisphosphate 1-phosphatase activity[GO:0042132]	NA	map00030:Pentose phosphate pathway(hexose diphosphatase[ec:3.1.3.11]) ; map01130:Biosynthesis of antibiotics(hexose diphosphatase[ec:3.1.3.11]) ; map00051:Fructose and mannose metabolism(hexose diphosphatase[ec:3.1.3.11]) ; map00710:Carbon fixation in photosynthetic organisms(hexose diphosphatase[ec:3.1.3.11]) ; map00010:Glycolysis / Gluconeogenesis(hexose diphosphatase[ec:3.1.3.11]) ; map00680:M…
TR29611|c0_g1_i3	376	3.48278e-35	100	124.79	217074108	unknown	Medicago truncatula	NA	dephosphorylation[GO:0016311] ; carbohydrate metabolic process[GO:0005975]	fructose 1,6-bisphosphate 1-phosphatase activity[GO:0042132]	NA	map00030:Pentose phosphate pathway(hexose diphosphatase[ec:3.1.3.11]) ; map01130:Biosynthesis of antibiotics(hexose diphosphatase[ec:3.1.3.11]) ; map00051:Fructose and mannose metabolism(hexose diphosphatase[ec:3.1.3.11]) ; map00710:Carbon fixation in photosynthetic organisms(hexose diphosphatase[ec:3.1.3.11]) ; map00010:Glycolysis / Gluconeogenesis(hexose diphosphatase[ec:3.1.3.11]) ; map00680:M…
TR38327|c0_g2_i1	296	9.41381e-40	90	139.043	217074368	unknown	Medicago truncatula	NA	NA	NA	NA	NA
TR42285|c0_g3_i1	230	1.59876e-44	98	154.836	217074496	unknown	Medicago truncatula	NA	branched-chain amino acid biosynthetic process[GO:0009082] ; oxidation-reduction process[GO:0055114]	ketol-acid reductoisomerase activity[GO:0004455]	NA	map00290:Valine, leucine and isoleucine biosynthesis(reductoisomerase (NADP+)[ec:1.1.1.86]) ; map01130:Biosynthesis of antibiotics(reductoisomerase (NADP+)[ec:1.1.1.86]) ; map00770:Pantothenate and CoA biosynthesis(reductoisomerase (NADP+)[ec:1.1.1.86])
TR43172|c0_g4_i1	667	3.05596e-51	96	169.859	217074590	unknown	Medicago truncatula	NA	protein phosphorylation[GO:0006468]	protein kinase activity[GO:0004672] ; ATP binding[GO:0005524]	NA	NA
TR28119|c0_g1_i2	511	4.77494e-50	95	164.851	217074590	unknown	Medicago truncatula	NA	protein phosphorylation[GO:0006468]	protein kinase activity[GO:0004672] ; ATP binding[GO:0005524]	NA	NA
TR37844|c0_g8_i2	429	1.05916e-37	86	137.502	217074902	unknown	Medicago truncatula	NA	proteolysis[GO:0006508]	serine-type carboxypeptidase activity[GO:0004185]	NA	NA
TR33771|c1_g1_i6	569	8.4845e-72	99	222.631	217075350	unknown	Medicago truncatula	NA	protein peptidyl-prolyl isomerization[GO:0000413]	peptidyl-prolyl cis-trans isomerase activity[GO:0003755]	NA	NA
TR33771|c1_g1_i2	1097	1.60078e-69	99	223.402	217075350	unknown	Medicago truncatula	NA	protein peptidyl-prolyl isomerization[GO:0000413]	peptidyl-prolyl cis-trans isomerase activity[GO:0003755]	NA	NA
TR2351|c0_g1_i1	424	2.71703e-87	96	268.47	217075899	unknown	Medicago truncatula	NA	NA	nucleic acid binding[GO:0003676] ; nucleotide binding[GO:0000166]	NA	NA
TR8298|c1_g5_i1	355	2.58313e-75	98	236.498	217075899	unknown	Medicago truncatula	NA	NA	nucleic acid binding[GO:0003676] ; nucleotide binding[GO:0000166]	NA	NA
TR29600|c1_g1_i1	739	1.36999e-28	86	112.849	217793962	ELF4-like protein	Ipomoea nil	NA	NA	NA	NA	NA
TR37669|c2_g1_i1	1099	0	97	561.607	218136543	1-deoxy-d-xylulose 5-phosphate reductoisomerase	Salvia miltiorrhiza	NA	isoprenoid biosynthetic process[GO:0008299] ; oxidation-reduction process[GO:0055114]	1-deoxy-D-xylulose-5-phosphate reductoisomerase activity[GO:0030604] ; metal ion binding[GO:0046872] ; NADPH binding[GO:0070402] ; isomerase activity[GO:0016853]	NA	map01130:Biosynthesis of antibiotics(reductoisomerase[ec:1.1.1.267]) ; map00900:Terpenoid backbone biosynthesis(reductoisomerase[ec:1.1.1.267])
TR37669|c2_g2_i1	900	2.32518e-135	95	401.364	218136543	1-deoxy-d-xylulose 5-phosphate reductoisomerase	Salvia miltiorrhiza	NA	isoprenoid biosynthetic process[GO:0008299] ; oxidation-reduction process[GO:0055114]	1-deoxy-D-xylulose-5-phosphate reductoisomerase activity[GO:0030604] ; metal ion binding[GO:0046872] ; NADPH binding[GO:0070402] ; isomerase activity[GO:0016853]	NA	map01130:Biosynthesis of antibiotics(reductoisomerase[ec:1.1.1.267]) ; map00900:Terpenoid backbone biosynthesis(reductoisomerase[ec:1.1.1.267])
TR37669|c2_g2_i3	562	8.50784e-93	94	287.345	218136543	1-deoxy-d-xylulose 5-phosphate reductoisomerase	Salvia miltiorrhiza	NA	isoprenoid biosynthetic process[GO:0008299] ; oxidation-reduction process[GO:0055114]	1-deoxy-D-xylulose-5-phosphate reductoisomerase activity[GO:0030604] ; metal ion binding[GO:0046872] ; NADPH binding[GO:0070402] ; isomerase activity[GO:0016853]	NA	map01130:Biosynthesis of antibiotics(reductoisomerase[ec:1.1.1.267]) ; map00900:Terpenoid backbone biosynthesis(reductoisomerase[ec:1.1.1.267])
TR29359|c0_g1_i8	435	2.09814e-13	63	72.0182	218187491	hypothetical protein OsI_00339	Oryza sativa Indica Group	NA	NA	NA	NA	NA
TR34883|c0_g4_i1	448	3.37538e-76	98	231.491	218187827	hypothetical protein OsI_01052	Oryza sativa Indica Group	NA	multicellular organismal development[GO:0007275] ; protein ubiquitination[GO:0016567] ; ubiquitin-dependent protein catabolic process[GO:0006511]	ligase activity[GO:0016874] ; metal ion binding[GO:0046872]	nucleus[GO:0005634] ; cytoplasmic, membrane-bounded vesicle[GO:0016023]	NA
TR31310|c0_g1_i1	241	2.68322e-36	97	132.494	218192643	hypothetical protein OsI_11197	Oryza sativa Indica Group	NA	protein dephosphorylation[GO:0006470]	protein serine/threonine phosphatase activity[GO:0004722]	NA	NA
TR8302|c0_g1_i3	343	2.86431e-29	100	109.383	218192748	hypothetical protein OsI_11402	Oryza sativa Indica Group	NA	positive regulation of GTPase activity[GO:0043547] ; small GTPase mediated signal transduction[GO:0007264]	guanyl-nucleotide exchange factor activity[GO:0005085]	intracellular[GO:0005622]	NA
TR34767|c0_g1_i11	397	1.81785e-77	100	236.498	218193429	hypothetical protein OsI_12863	Oryza sativa Indica Group	NA	DNA-templated transcription, initiation[GO:0006352]	DNA binding[GO:0003677]	NA	NA
TR34767|c0_g1_i6	635	3.72169e-76	100	236.498	218193429	hypothetical protein OsI_12863	Oryza sativa Indica Group	NA	DNA-templated transcription, initiation[GO:0006352]	DNA binding[GO:0003677]	NA	NA
TR44165|c1_g3_i2	255	5.39999e-33	95	118.242	218194776	hypothetical protein OsI_15715	Oryza sativa Indica Group	NA	NA	NA	NA	NA
TR44165|c1_g3_i3	374	1.82223e-31	98	115.931	218194776	hypothetical protein OsI_15715	Oryza sativa Indica Group	NA	NA	NA	NA	NA
TR2214|c2_g1_i1	587	2.10541e-136	100	390.193	218198762	hypothetical protein OsI_24195	Oryza sativa Indica Group	NA	ubiquitin-dependent protein catabolic process[GO:0006511]	NA	cytoplasm[GO:0005737]	NA
TR48185|c0_g1_i1	242	1.13584e-15	82	75.0998	218200585	hypothetical protein OsI_28070	Oryza sativa Indica Group	NA	NA	NA	cytoplasm[GO:0005737]	NA
TR38715|c0_g4_i2	368	7.35727e-42	100	142.124	218200637	hypothetical protein OsI_28173	Oryza sativa Indica Group	NA	NA	NA	NA	NA
TR33598|c0_g1_i11	959	8.87498e-27	95	89.3521	218201855	hypothetical protein OsI_30754	Oryza sativa Indica Group	NA	DNA integration[GO:0015074]	nucleic acid binding[GO:0003676] ; zinc ion binding[GO:0008270]	NA	NA
TR43009|c2_g9_i1	227	2.15666e-44	98	149.058	218202344	hypothetical protein OsI_31801	Oryza sativa Indica Group	NA	protein folding[GO:0006457] ; response to stress[GO:0006950]	ATP binding[GO:0005524] ; unfolded protein binding[GO:0051082]	NA	NA
TR37452|c0_g1_i1	544	1.9954e-109	96	323.553	218552041	hydroxyphenylpyruvate reductase	Salvia officinalis	Lamiaceae	oxidation-reduction process[GO:0055114]	NAD binding[GO:0051287] ; oxidoreductase activity, acting on the CH-OH group of donors, NAD or NADP as acceptor[GO:0016616]	NA	NA
TR3657|c1_g4_i1	287	1.48514e-58	100	196.438	219363213	uncharacterized protein LOC100216599	Zea mays	NA	metabolic process[GO:0008152]	4 iron, 4 sulfur cluster binding[GO:0051539] ; aconitate hydratase activity[GO:0003994]	NA	map00630:Glyoxylate and dicarboxylate metabolism(hydratase[ec:4.2.1.3]) ; map01130:Biosynthesis of antibiotics(hydratase[ec:4.2.1.3]) ; map00720:Carbon fixation pathways in prokaryotes(hydratase[ec:4.2.1.3]) ; map00020:Citrate cycle (TCA cycle)(hydratase[ec:4.2.1.3])
TR41683|c1_g2_i1	315	9.17979e-51	89	175.637	219671340	4-coumarate coenzyme A ligase	Paulownia fortunei	NA	metabolic process[GO:0008152]	ligase activity[GO:0016874]	NA	NA
TR34949|c1_g4_i6	497	1.65852e-110	96	326.25	219816411	plasma membrane H+-ATPase	Eichhornia crassipes	NA	NA	metal ion binding[GO:0046872] ; nucleotide binding[GO:0000166]	integral component of membrane[GO:0016021]	NA
TR37078|c0_g1_i1	395	8.67312e-84	96	256.914	219816411	plasma membrane H+-ATPase	Eichhornia crassipes	NA	NA	metal ion binding[GO:0046872] ; nucleotide binding[GO:0000166]	integral component of membrane[GO:0016021]	NA
TR37078|c0_g2_i7	372	4.11463e-81	100	249.595	219816411	plasma membrane H+-ATPase	Eichhornia crassipes	NA	NA	metal ion binding[GO:0046872] ; nucleotide binding[GO:0000166]	integral component of membrane[GO:0016021]	NA
TR37078|c0_g5_i1	236	1.30134e-45	98	156.377	219816411	plasma membrane H+-ATPase	Eichhornia crassipes	NA	NA	metal ion binding[GO:0046872] ; nucleotide binding[GO:0000166]	integral component of membrane[GO:0016021]	NA
TR38023|c0_g7_i1	296	4.34712e-60	96	194.512	219816413	plasma membrane H+-ATPase	Eichhornia crassipes	NA	NA	metal ion binding[GO:0046872] ; nucleotide binding[GO:0000166]	integral component of membrane[GO:0016021]	NA
TR42338|c0_g2_i2	602	6.48802e-48	93	171.014	219886233	unknown	Zea mays	NA	protein refolding[GO:0042026]	ATP binding[GO:0005524]	cytoplasm[GO:0005737]	NA
TR26663|c0_g1_i3	693	3.78241e-114	96	334.724	219886689	unknown	Zea mays	NA	metabolic process[GO:0008152]	transferase activity, transferring acyl groups[GO:0016746]	NA	NA
TR43800|c2_g6_i1	401	4.33638e-75	95	231.106	219886689	unknown	Zea mays	NA	metabolic process[GO:0008152]	transferase activity, transferring acyl groups[GO:0016746]	NA	NA
TR43800|c2_g8_i2	377	3.50475e-72	96	223.402	219886689	unknown	Zea mays	NA	metabolic process[GO:0008152]	transferase activity, transferring acyl groups[GO:0016746]	NA	NA
TR38023|c0_g2_i1	371	4.34731e-76	95	233.802	219939381	ATPase 3	Arabidopsis thaliana	NA	NA	NA	NA	NA
TR31834|c0_g1_i3	305	7.54192e-31	89	116.316	219986890	graminifolia protein	Streptocarpus rexii	NA	multicellular organismal development[GO:0007275]	NA	NA	NA
TR44143|c1_g1_i7	374	9.33472e-59	96	189.504	221222541	putative protein	Coffea canephora	NA	NA	NA	NA	NA
TR39094|c0_g2_i3	544	8.4817e-07	84	53.9138	221271526	cyclin D3	Ipomoea batatas	NA	NA	NA	nucleus[GO:0005634]	NA
TR8238|c0_g4_i1	328	3.79506e-66	97	207.608	221326302	arginine decarboxylase	Solanum chilense	NA	arginine catabolic process[GO:0006527] ; spermidine biosynthetic process[GO:0008295]	arginine decarboxylase activity[GO:0008792]	NA	map00330:Arginine and proline metabolism(decarboxylase[ec:4.1.1.19])
TR8238|c0_g12_i1	225	2.50932e-38	94	134.806	221326444	arginine decarboxylase	Solanum lycopersicoides	NA	arginine catabolic process[GO:0006527] ; spermidine biosynthetic process[GO:0008295]	arginine decarboxylase activity[GO:0008792]	NA	map00330:Arginine and proline metabolism(decarboxylase[ec:4.1.1.19])
TR41663|c2_g4_i2	310	1.31301e-29	95	113.62	222424641	AT1G55490	Arabidopsis thaliana	NA	NA	NA	NA	NA
TR41663|c2_g4_i4	502	1.13226e-28	95	113.62	222424641	AT1G55490	Arabidopsis thaliana	NA	NA	NA	NA	NA
TR39820|c0_g1_i1	520	3.39874e-63	96	199.134	222424721	AT1G78900	Arabidopsis thaliana	NA	NA	NA	NA	NA
TR31903|c0_g1_i5	231	2.23389e-31	100	115.931	222424725	AT2G25520	Arabidopsis thaliana	NA	NA	NA	NA	NA
TR29826|c2_g2_i5	383	4.11297e-78	100	236.884	222618163	hypothetical protein OsJ_01227	Oryza sativa Japonica Group	NA	NA	calcium ion binding[GO:0005509]	NA	NA
TR3640|c0_g5_i3	367	1.38101e-72	100	222.631	222618163	hypothetical protein OsJ_01227	Oryza sativa Japonica Group	NA	NA	calcium ion binding[GO:0005509]	NA	NA
TR33639|c1_g1_i4	349	1.84824e-67	100	209.149	222618163	hypothetical protein OsJ_01227	Oryza sativa Japonica Group	NA	NA	calcium ion binding[GO:0005509]	NA	NA
TR44047|c1_g1_i3	271	1.24384e-54	97	183.726	222619308	hypothetical protein OsJ_03581	Oryza sativa Japonica Group	NA	NA	NA	integral component of membrane[GO:0016021]	NA
TR44163|c1_g1_i1	831	4.65411e-119	97	334.724	222629708	hypothetical protein OsJ_16493	Oryza sativa Japonica Group	NA	protein phosphorylation[GO:0006468]	protein kinase activity[GO:0004672] ; ATP binding[GO:0005524]	NA	NA
TR79|c0_g1_i1	268	1.43105e-55	100	193.741	222630305	hypothetical protein OsJ_17229	Oryza sativa Japonica Group	NA	mRNA splicing, via spliceosome[GO:0000398]	U6 snRNA binding[GO:0017070] ; U5 snRNA binding[GO:0030623]	spliceosomal complex[GO:0005681] ; cytoplasmic, membrane-bounded vesicle[GO:0016023]	NA
TR7679|c0_g1_i3	1913	0	96	975.696	223452696	mitochondrial benzaldehyde dehydrogenase	Antirrhinum majus	NA	oxidation-reduction process[GO:0055114]	aldehyde dehydrogenase (NAD) activity[GO:0004029]	NA	map00071:Fatty acid degradation(dehydrogenase (NAD+)[ec:1.2.1.3]) ; map00410:beta-Alanine metabolism(dehydrogenase (NAD+)[ec:1.2.1.3]) ; map00380:Tryptophan metabolism(dehydrogenase (NAD+)[ec:1.2.1.3]) ; map01130:Biosynthesis of antibiotics(dehydrogenase (NAD+)[ec:1.2.1.3]) ; map00310:Lysine degradation(dehydrogenase (NAD+)[ec:1.2.1.3]) ; map00280:Valine, leucine and isoleucine degradation(dehydr…
TR7679|c0_g1_i2	671	4.22336e-129	95	384.03	223452696	mitochondrial benzaldehyde dehydrogenase	Antirrhinum majus	NA	oxidation-reduction process[GO:0055114]	aldehyde dehydrogenase (NAD) activity[GO:0004029]	NA	map00071:Fatty acid degradation(dehydrogenase (NAD+)[ec:1.2.1.3]) ; map00410:beta-Alanine metabolism(dehydrogenase (NAD+)[ec:1.2.1.3]) ; map00380:Tryptophan metabolism(dehydrogenase (NAD+)[ec:1.2.1.3]) ; map01130:Biosynthesis of antibiotics(dehydrogenase (NAD+)[ec:1.2.1.3]) ; map00310:Lysine degradation(dehydrogenase (NAD+)[ec:1.2.1.3]) ; map00280:Valine, leucine and isoleucine degradation(dehydr…
TR24048|c0_g1_i2	611	5.60496e-19	88	84.7297	223469637	low-molecular-weight cysteine-rich 69	Jatropha curcas	NA	defense response to fungus[GO:0050832] ; killing of cells of other organism[GO:0031640]	NA	NA	NA
TR35255|c2_g4_i1	238	2.23719e-28	96	107.842	223943043	unknown	Zea mays	NA	photosynthesis, light harvesting[GO:0009765] ; protein-chromophore linkage[GO:0018298]	chlorophyll binding[GO:0016168]	photosystem II[GO:0009523] ; integral component of membrane[GO:0016021] ; chloroplast[GO:0009507]	NA
TR38920|c0_g1_i1	388	5.35557e-11	96	61.2326	223946089	unknown	Zea mays	NA	NA	NA	NA	NA
TR29052|c0_g9_i3	388	2.7096e-85	99	256.914	223946975	unknown	Zea mays	NA	metabolic process[GO:0008152]	catalytic activity[GO:0003824]	NA	NA
TR37219|c2_g2_i5	246	5.04273e-52	98	170.629	223973477	unknown	Zea mays	NA	metabolic process[GO:0008152]	hydrolase activity[GO:0016787]	NA	NA
TR31618|c1_g3_i1	397	6.39533e-46	100	152.525	223974323	unknown	Zea mays	NA	translation[GO:0006412]	NA	NA	NA
TR32262|c0_g4_i1	253	3.95593e-36	100	126.331	224034483	unknown	Zea mays	NA	translation[GO:0006412]	structural constituent of ribosome[GO:0003735]	ribosome[GO:0005840]	NA
TR42805|c0_g2_i1	364	4.4777e-10	91	60.4622	224034627	unknown	Zea mays	NA	tryptophanyl-tRNA aminoacylation[GO:0006436]	tryptophan-tRNA ligase activity[GO:0004830] ; ATP binding[GO:0005524]	cytoplasm[GO:0005737]	map00970:Aminoacyl-tRNA biosynthesis(ligase[ec:6.1.1.2])
TR35285|c0_g2_i1	244	1.1944e-35	94	129.028	224035657	unknown	Zea mays	NA	metabolic process[GO:0008152]	NAD+ ADP-ribosyltransferase activity[GO:0003950]	NA	NA
TR30365|c0_g1_i8	416	2.35888e-73	100	223.402	224059774	hypothetical protein POPTR_0001s28440g	Populus trichocarpa	NA	mRNA splicing, via spliceosome[GO:0000398]	NA	U2 snRNP[GO:0005686] ; precatalytic spliceosome[GO:0071011] ; U12-type spliceosomal complex[GO:0005689] ; catalytic step 2 spliceosome[GO:0071013]	NA
TR30365|c0_g1_i7	627	9.66041e-72	99	222.246	224059774	hypothetical protein POPTR_0001s28440g	Populus trichocarpa	NA	mRNA splicing, via spliceosome[GO:0000398]	NA	U2 snRNP[GO:0005686] ; precatalytic spliceosome[GO:0071011] ; U12-type spliceosomal complex[GO:0005689] ; catalytic step 2 spliceosome[GO:0071013]	NA
TR30365|c0_g1_i10	434	2.34579e-64	98	200.675	224059774	hypothetical protein POPTR_0001s28440g	Populus trichocarpa	NA	mRNA splicing, via spliceosome[GO:0000398]	NA	U2 snRNP[GO:0005686] ; precatalytic spliceosome[GO:0071011] ; U12-type spliceosomal complex[GO:0005689] ; catalytic step 2 spliceosome[GO:0071013]	NA
TR30365|c0_g1_i2	240	1.24109e-32	98	117.087	224059774	hypothetical protein POPTR_0001s28440g	Populus trichocarpa	NA	mRNA splicing, via spliceosome[GO:0000398]	NA	U2 snRNP[GO:0005686] ; precatalytic spliceosome[GO:0071011] ; U12-type spliceosomal complex[GO:0005689] ; catalytic step 2 spliceosome[GO:0071013]	NA
TR28212|c2_g1_i1	225	2.75805e-20	97	85.8853	224060503	ribosomal protein S16	Populus trichocarpa	NA	translation[GO:0006412] ; maturation of SSU-rRNA from tricistronic rRNA transcript (SSU-rRNA, 5.8S rRNA, LSU-rRNA)[GO:0000462]	structural constituent of ribosome[GO:0003735]	cytosolic small ribosomal subunit[GO:0022627]	NA
TR32080|c2_g1_i4	489	1.72538e-24	92	98.2117	224065405	wound-responsive family protein	Populus trichocarpa	NA	NA	NA	NA	NA
TR4018|c1_g5_i2	553	3.86237e-69	98	215.698	224068883	translation initiation factor eIF-1A family protein	Populus trichocarpa	NA	translational initiation[GO:0006413]	translation initiation factor activity[GO:0003743]	NA	NA
TR35658|c0_g3_i2	244	1.21232e-26	91	105.145	224071241	hypothetical protein POPTR_0003s08070g	Populus trichocarpa	NA	NA	NA	integral component of membrane[GO:0016021]	NA
TR35658|c0_g3_i1	281	2.92633e-21	90	90.8929	224071241	hypothetical protein POPTR_0003s08070g	Populus trichocarpa	NA	NA	NA	integral component of membrane[GO:0016021]	NA
TR39963|c2_g2_i5	607	1.82931e-97	90	297.745	224071429	Phosphoribulokinase family protein	Populus trichocarpa	NA	carbohydrate metabolic process[GO:0005975] ; pyrimidine nucleobase metabolic process[GO:0006206] ; UMP biosynthetic process[GO:0006222] ; phosphorylation[GO:0016310] ; pyrimidine nucleoside salvage[GO:0043097]	uridine kinase activity[GO:0004849] ; ATP binding[GO:0005524] ; phosphoribulokinase activity[GO:0008974]	cytosol[GO:0005829] ; chloroplast[GO:0009507]	map00983:Drug metabolism - other enzymes(kinase[ec:2.7.1.48]) ; map00240:Pyrimidine metabolism(kinase[ec:2.7.1.48]) ; map00710:Carbon fixation in photosynthetic organisms(phosphopentokinase[ec:2.7.1.19])
TR1215|c0_g1_i1	327	1.24996e-68	100	211.46	224072097	ubiquitin conjugating-like enzyme family protein	Populus trichocarpa	NA	metabolic process[GO:0008152]	ATP binding[GO:0005524] ; ligase activity[GO:0016874]	NA	NA
TR34770|c1_g3_i1	234	2.07176e-38	87	136.732	224072588	hypothetical protein POPTR_0003s17100g, partial	Populus trichocarpa	NA	NA	zinc ion binding[GO:0008270]	NA	NA
TR41431|c0_g4_i1	338	1.45028e-59	91	199.519	224077852	hypothetical protein POPTR_0004s16370g	Populus trichocarpa	NA	lignin biosynthetic process[GO:0009809] ; lignin catabolic process[GO:0046274] ; oxidation-reduction process[GO:0055114]	oxidoreductase activity, oxidizing metal ions[GO:0016722] ; copper ion binding[GO:0005507] ; hydroquinone:oxygen oxidoreductase activity[GO:0052716]	apoplast[GO:0048046]	NA
TR28750|c1_g1_i4	478	6.51993e-39	85	140.198	224078826	Oxygen-evolving enhancer protein 3-1	Populus trichocarpa	NA	photosynthesis[GO:0015979]	calcium ion binding[GO:0005509]	photosystem II oxygen evolving complex[GO:0009654] ; extrinsic component of membrane[GO:0019898]	NA
TR18735|c0_g1_i1	225	5.78196e-41	94	146.747	224080331	cyclase associated protein 1	Populus trichocarpa	NA	cell morphogenesis[GO:0000902] ; cytoskeleton organization[GO:0007010]	actin binding[GO:0003779]	NA	NA
TR34215|c1_g1_i7	423	2.46479e-45	92	160.614	224083147	hypothetical protein POPTR_0005s26610g	Populus trichocarpa	NA	intracellular signal transduction[GO:0035556]	metal ion binding[GO:0046872]	intracellular[GO:0005622]	NA
TR30166|c0_g3_i3	577	1.69806e-67	99	212.231	224083970	Ubiquitin-related protein 2 precursor	Populus trichocarpa	NA	NA	NA	NA	NA
TR42583|c1_g4_i2	457	3.59849e-103	99	313.538	224086314	CsPK1.1 family protein	Populus trichocarpa	NA	protein phosphorylation[GO:0006468]	protein kinase activity[GO:0004672] ; ATP binding[GO:0005524]	NA	NA
TR7369|c0_g1_i1	435	5.80182e-92	98	284.263	224086314	CsPK1.1 family protein	Populus trichocarpa	NA	protein phosphorylation[GO:0006468]	protein kinase activity[GO:0004672] ; ATP binding[GO:0005524]	NA	NA
TR42583|c0_g1_i2	310	4.55625e-56	90	189.119	224086314	CsPK1.1 family protein	Populus trichocarpa	NA	protein phosphorylation[GO:0006468]	protein kinase activity[GO:0004672] ; ATP binding[GO:0005524]	NA	NA
TR39820|c1_g3_i1	472	2.40017e-69	87	226.868	224094662	hypothetical protein POPTR_0007s12160g	Populus trichocarpa	NA	NA	NA	NA	NA
TR32858|c1_g3_i1	260	3.08095e-11	80	64.3142	224096682	hypothetical protein POPTR_0007s08590g	Populus trichocarpa	NA	tricarboxylic acid cycle[GO:0006099]	NAD binding[GO:0051287] ; magnesium ion binding[GO:0000287] ; isocitrate dehydrogenase (NAD+) activity[GO:0004449]	NA	map01130:Biosynthesis of antibiotics(dehydrogenase (NAD+)[ec:1.1.1.41]) ; map00020:Citrate cycle (TCA cycle)(dehydrogenase (NAD+)[ec:1.1.1.41])
TR7454|c0_g1_i1	1352	6.64826e-13	55	74.7146	224097606	hypothetical protein POPTR_0008s02040g	Populus trichocarpa	NA	NA	NA	NA	NA
TR28282|c1_g1_i3	451	2.50393e-56	96	183.726	224097801	Rab-like GTP-ase family protein	Populus trichocarpa	NA	small GTPase mediated signal transduction[GO:0007264] ; protein transport[GO:0015031]	GTP binding[GO:0005525]	intracellular[GO:0005622]	NA
TR7945|c0_g5_i1	445	1.21138e-33	93	128.642	224099761	hypothetical protein POPTR_0008s14910g	Populus trichocarpa	NA	NA	NA	NA	NA
TR7945|c0_g5_i4	439	5.18225e-33	92	126.716	224099761	hypothetical protein POPTR_0008s14910g	Populus trichocarpa	NA	NA	NA	NA	NA
TR28347|c0_g4_i1	313	4.89887e-15	87	71.2478	224101587	60S ribosomal protein L29	Populus trichocarpa	NA	cytoplasmic translation[GO:0002181]	structural constituent of ribosome[GO:0003735]	cytosolic large ribosomal subunit[GO:0022625]	NA
TR41820|c1_g10_i2	466	1.67852e-40	70	149.443	224103501	hypothetical protein POPTR_0009s11110g	Populus trichocarpa	NA	NA	NA	NA	NA
TR26705|c1_g2_i3	599	1.84462e-38	87	135.961	224105853	hypothetical protein POPTR_0009s08330g	Populus trichocarpa	NA	NA	NA	NA	NA
TR35882|c0_g1_i6	275	4.89402e-46	92	156.377	224106031	hypothetical protein POPTR_0009s07030g	Populus trichocarpa	NA	photosynthetic electron transport in photosystem I[GO:0009773] ; isopentenyl diphosphate biosynthetic process, methylerythritol 4-phosphate pathway[GO:0019288] ; protein targeting to chloroplast[GO:0045036]	nucleic acid binding[GO:0003676] ; nucleotide binding[GO:0000166]	chloroplast envelope[GO:0009941] ; chloroplast thylakoid membrane[GO:0009535] ; chloroplast stroma[GO:0009570]	NA
TR38190|c0_g5_i1	269	1.45635e-41	98	144.436	224108996	expansin 4 family protein	Populus trichocarpa	NA	plant-type cell wall organization[GO:0009664]	NA	extracellular region[GO:0005576] ; cell wall[GO:0005618] ; membrane[GO:0016020]	NA
TR33221|c0_g1_i7	791	7.19141e-74	80	232.261	224110510	hypothetical protein POPTR_0010s02840g	Populus trichocarpa	NA	NA	NA	integral component of membrane[GO:0016021]	NA
TR34672|c0_g1_i6	591	3.45996e-11	83	67.0106	224112287	hypothetical protein POPTR_0010s17700g	Populus trichocarpa	NA	NA	NA	NA	NA
TR42350|c1_g5_i3	817	9.46501e-39	89	148.288	224113017	patatin-related family protein	Populus trichocarpa	NA	lipid catabolic process[GO:0016042]	hydrolase activity[GO:0016787]	NA	NA
TR35915|c0_g4_i2	337	1.15414e-19	93	84.7297	224113109	hypothetical protein POPTR_0010s23450g	Populus trichocarpa	NA	NA	NA	NA	NA
TR40948|c3_g1_i2	284	6.86229e-49	94	169.859	224113185	hypothetical protein POPTR_0010s23940g	Populus trichocarpa	NA	glycolytic process[GO:0006096]	potassium ion binding[GO:0030955] ; pyruvate kinase activity[GO:0004743] ; magnesium ion binding[GO:0000287] ; kinase activity[GO:0016301]	NA	map01130:Biosynthesis of antibiotics(kinase[ec:2.7.1.40]) ; map00620:Pyruvate metabolism(kinase[ec:2.7.1.40]) ; map00010:Glycolysis / Gluconeogenesis(kinase[ec:2.7.1.40]) ; map00230:Purine metabolism(kinase[ec:2.7.1.40])
TR3414|c0_g1_i1	297	7.00505e-28	100	106.686	224118040	calmodulin-like protein 6a	Populus trichocarpa	NA	NA	calcium ion binding[GO:0005509]	NA	NA
TR7293|c0_g1_i1	470	1.02546e-09	69	58.5362	224120858	hypothetical protein POPTR_0012s02450g	Populus trichocarpa	NA	NA	NA	NA	NA
TR2214|c3_g2_i1	404	5.61293e-88	100	260.766	224120992	UBIQUITIN EXTENSION protein 1	Populus trichocarpa	NA	translation[GO:0006412]	structural constituent of ribosome[GO:0003735]	ribosome[GO:0005840]	NA
TR36191|c1_g6_i1	290	7.89713e-51	95	167.933	224123646	hypothetical protein POPTR_0013s04830g	Populus trichocarpa	NA	ATP hydrolysis coupled proton transport[GO:0015991]	proton-transporting ATPase activity, rotational mechanism[GO:0046961]	proton-transporting two-sector ATPase complex, catalytic domain[GO:0033178]	NA
TR40910|c0_g3_i1	351	7.82808e-30	95	112.849	224126635	hypothetical protein POPTR_0013s09610g	Populus trichocarpa	NA	NA	NA	NA	NA
TR24900|c1_g1_i2	1197	1.59974e-44	64	106.686	224130152	hypothetical protein POPTR_0014s07280g	Populus trichocarpa	NA	NA	NA	NA	NA
TR7663|c0_g12_i1	234	1.02121e-50	98	163.696	224132224	hypothetical protein POPTR_0014s18940g	Populus trichocarpa	NA	translation[GO:0006412]	structural constituent of ribosome[GO:0003735]	cytosolic large ribosomal subunit[GO:0022625]	NA
TR36969|c0_g1_i2	824	1.0836e-64	58	213.772	224133542	hypothetical protein POPTR_0015s08810g	Populus trichocarpa	NA	NA	NA	NA	NA
TR32115|c1_g2_i1	392	3.01695e-11	88	62.003	224138442	hypothetical protein POPTR_0016s07700g	Populus trichocarpa	NA	NA	NA	NA	NA
TR27166|c0_g1_i1	291	1.71396e-51	95	179.104	224138990	ceramidase family protein	Populus trichocarpa	NA	NA	NA	plasmodesma[GO:0009506]	NA
TR36451|c0_g2_i1	224	8.74548e-35	91	129.798	224140169	hypothetical protein POPTR_0016s08790g	Populus trichocarpa	NA	mitotic cell cycle[GO:0000278] ; RNA processing[GO:0006396] ; NLS-bearing protein import into nucleus[GO:0006607] ; positive regulation of cellular process[GO:0048522] ; response to xenobiotic stimulus[GO:0009410]	protein transporter activity[GO:0008565] ; nuclear localization sequence binding[GO:0008139]	cytosol[GO:0005829] ; nuclear pore[GO:0005643] ; nucleoplasm[GO:0005654]	NA
TR36992|c0_g1_i1	2595	0	78	531.946	224142229	Villin 4 family protein	Populus trichocarpa	NA	cytoskeleton organization[GO:0007010]	actin binding[GO:0003779]	NA	NA
TR33962|c0_g1_i8	1079	1.27742e-80	77	186.037	224142339	glutamine amidotransferase class-I domain-containing family protein	Populus trichocarpa	NA	NA	NA	NA	NA
TR39935|c0_g4_i1	257	2.06723e-48	96	165.236	224142601	Actin-related family protein	Populus trichocarpa	NA	chromatin remodeling[GO:0006338]	NA	nucleus[GO:0005634]	NA
TR3746|c2_g3_i2	370	7.85626e-42	90	143.28	224143081	hypothetical protein POPTR_0018s01310g	Populus trichocarpa	NA	chromatin silencing[GO:0006342]	DNA binding[GO:0003677] ; protein heterodimerization activity[GO:0046982]	nucleosome[GO:0000786] ; nuclear chromatin[GO:0000790]	NA
TR31324|c0_g4_i2	742	1.11451e-101	92	302.368	224143349	hypothetical protein POPTR_0018s02780g	Populus trichocarpa	NA	NA	NA	integral component of membrane[GO:0016021]	NA
TR35813|c0_g1_i3	810	4.36832e-114	94	343.199	224143559	aspartate aminotransferase family protein	Populus trichocarpa	NA	cellular amino acid metabolic process[GO:0006520] ; biosynthetic process[GO:0009058]	pyridoxal phosphate binding[GO:0030170] ; identical protein binding[GO:0042802] ; L-aspartate:2-oxoglutarate aminotransferase activity[GO:0004069] ; L-phenylalanine:2-oxoglutarate aminotransferase activity[GO:0080130]	NA	map00130:Ubiquinone and other terpenoid-quinone biosynthesis(transaminase[ec:2.6.1.5]) ; map00350:Tyrosine metabolism(transaminase[ec:2.6.1.57]) ; map00350:Tyrosine metabolism(transaminase[ec:2.6.1.9]) ; map00350:Tyrosine metabolism(transaminase[ec:2.6.1.5]) ; map00350:Tyrosine metabolism(transaminase[ec:2.6.1.1]) ; map00220:Arginine biosynthesis(transaminase[ec:2.6.1.1]) ; map00950:Isoquinoline …
TR30441|c0_g1_i3	774	5.10138e-77	91	239.195	224146003	copper/zinc superoxide dismutase 3 family protein	Populus trichocarpa	NA	removal of superoxide radicals[GO:0019430] ; oxidation-reduction process[GO:0055114]	copper ion binding[GO:0005507] ; superoxide dismutase activity[GO:0004784] ; zinc ion binding[GO:0008270]	cytoplasm[GO:0005737] ; extracellular space[GO:0005615]	NA
TR42714|c1_g4_i1	281	2.31078e-40	86	145.591	224146378	hypothetical protein POPTR_0019s11200g	Populus trichocarpa	NA	NA	zinc ion binding[GO:0008270]	integral component of membrane[GO:0016021]	NA
TR43468|c3_g1_i4	737	6.59392e-136	96	390.963	225001262	putative phosphoglycerate dehydrogenase	Arachis hypogaea	NA	metabolic process[GO:0008152]	amino acid binding[GO:0016597]	NA	NA
TR2415|c4_g1_i1	539	2.80764e-122	98	358.607	225423424	PREDICTED: alpha-1,4-glucan-protein synthase [UDP-forming] 2	Vitis vinifera	NA	UDP-L-arabinose metabolic process[GO:0033356] ; cellulose biosynthetic process[GO:0030244] ; plant-type cell wall biogenesis[GO:0009832]	UDP-arabinopyranose mutase activity[GO:0052691]	Golgi apparatus[GO:0005794] ; cytosol[GO:0005829]	map00520:Amino sugar and nucleotide sugar metabolism(mutase[ec:5.4.99.30])
TR38354|c0_g4_i4	925	0	94	553.518	225423716	PREDICTED: uncharacterized protein yqjG-like	Vitis vinifera	NA	NA	NA	NA	NA
TR36042|c0_g1_i1	894	1.43919e-42	60	159.458	225423879	PREDICTED: NAC domain-containing protein 8-like	Vitis vinifera	NA	NA	NA	NA	NA
TR36885|c0_g1_i1	1004	1.38987e-119	80	362.459	225424345	PREDICTED: UBX domain-containing protein 6	Vitis vinifera	NA	N-terminal protein myristoylation[GO:0006499]	metal ion binding[GO:0046872]	NA	NA
TR34287|c2_g3_i6	364	3.37096e-77	97	242.276	225424562	PREDICTED: probable pectate lyase 5	Vitis vinifera	NA	pectin catabolic process[GO:0045490]	metal ion binding[GO:0046872] ; pectate lyase activity[GO:0030570]	NA	map00040:Pentose and glucuronate interconversions(lyase[ec:4.2.2.2])
TR31116|c0_g4_i1	499	5.95036e-46	98	155.221	225425388	PREDICTED: nuclear transport factor 2 isoform 1	Vitis vinifera	NA	protein import into peroxisome matrix[GO:0016558] ; protein import into nucleus[GO:0006606] ; intra-Golgi vesicle-mediated transport[GO:0006891] ; lipid transport[GO:0006869] ; lithium ion transport[GO:0010351]	Ran GTPase binding[GO:0008536]	nuclear envelope[GO:0005635] ; cytoplasm[GO:0005737]	NA
TR28055|c0_g1_i1	575	2.94842e-14	100	73.559	225426208	PREDICTED: uncharacterized protein C119.09c isoform 1	Vitis vinifera	NA	NA	NA	integral component of membrane[GO:0016021] ; endoplasmic reticulum membrane[GO:0005789]	NA
TR8250|c2_g2_i3	248	3.88654e-50	95	173.711	225426379	PREDICTED: probable LRR receptor-like serine/threonine-protein kinase At1g63430 isoform 2	Vitis vinifera	NA	protein phosphorylation[GO:0006468]	protein kinase activity[GO:0004672] ; ATP binding[GO:0005524]	integral component of membrane[GO:0016021]	NA
TR41939|c0_g3_i1	412	2.63624e-37	93	136.732	225426743	PREDICTED: probable rhamnose biosynthetic enzyme 1	Vitis vinifera	NA	dTDP-rhamnose biosynthetic process[GO:0019305] ; UDP-rhamnose biosynthetic process[GO:0010253] ; oxidation-reduction process[GO:0055114]	UDP-4-keto-6-deoxy-glucose-3,5-epimerase activity[GO:0010489] ; UDP-4-keto-rhamnose-4-keto-reductase activity[GO:0010490] ; dTDP-4-dehydrorhamnose 3,5-epimerase activity[GO:0008830]	plasmodesma[GO:0009506] ; plasma membrane[GO:0005886] ; cytosol[GO:0005829] ; apoplast[GO:0048046]	map01130:Biosynthesis of antibiotics(3,5-epimerase[ec:5.1.3.13]) ; map00523:Polyketide sugar unit biosynthesis(3,5-epimerase[ec:5.1.3.13]) ; map00521:Streptomycin biosynthesis(3,5-epimerase[ec:5.1.3.13])
TR43175|c1_g3_i4	287	2.15853e-29	82	116.701	225427524	PREDICTED: probable methyltransferase PMT20	Vitis vinifera	NA	methylation[GO:0032259]	S-adenosylmethionine-dependent methyltransferase activity[GO:0008757]	trans-Golgi network[GO:0005802] ; integral component of membrane[GO:0016021] ; endosome[GO:0005768]	NA
TR8011|c0_g2_i1	350	4.03375e-71	100	231.106	225427798	PREDICTED: amidophosphoribosyltransferase, chloroplastic	Vitis vinifera	NA	purine nucleobase biosynthetic process[GO:0009113] ; nucleoside metabolic process[GO:0009116]	amidophosphoribosyltransferase activity[GO:0004044]	NA	map00250:Alanine, aspartate and glutamate metabolism(phosphoribosyldiphosphate 5-amidotransferase[ec:2.4.2.14]) ; map01130:Biosynthesis of antibiotics(phosphoribosyldiphosphate 5-amidotransferase[ec:2.4.2.14]) ; map00230:Purine metabolism(phosphoribosyldiphosphate 5-amidotransferase[ec:2.4.2.14])
TR34348|c0_g2_i17	1116	3.94513e-96	77	217.624	225427938	PREDICTED: magnesium transporter NIPA2	Vitis vinifera	NA	single-organism transport[GO:0044765]	NA	membrane[GO:0016020]	NA
TR34024|c0_g1_i4	1074	5.08098e-113	83	338.576	225428338	PREDICTED: expansin-A20	Vitis vinifera	NA	plant-type cell wall organization[GO:0009664]	NA	extracellular region[GO:0005576] ; cell wall[GO:0005618] ; membrane[GO:0016020]	NA
TR34024|c0_g1_i1	1097	3.1039e-109	83	328.946	225428338	PREDICTED: expansin-A20	Vitis vinifera	NA	plant-type cell wall organization[GO:0009664]	NA	extracellular region[GO:0005576] ; cell wall[GO:0005618] ; membrane[GO:0016020]	NA
TR35610|c0_g4_i3	239	2.86865e-51	96	169.088	225428883	PREDICTED: uncharacterized protein LOC100241815	Vitis vinifera	NA	NA	calcium ion binding[GO:0005509] ; calcium-dependent phospholipid binding[GO:0005544]	NA	NA
TR20788|c0_g1_i2	446	3.84194e-12	90	64.6994	225429205	PREDICTED: uncharacterized protein LOC100258330	Vitis vinifera	NA	NA	NA	NA	NA
TR3549|c0_g8_i2	629	5.96895e-54	83	177.563	225429512	PREDICTED: glutaredoxin-C6	Vitis vinifera	NA	cell redox homeostasis[GO:0045454] ; oxidation-reduction process[GO:0055114]	electron carrier activity[GO:0009055] ; protein disulfide oxidoreductase activity[GO:0015035]	cell[GO:0005623]	NA
TR3549|c0_g8_i1	270	2.57047e-29	90	109.768	225429512	PREDICTED: glutaredoxin-C6	Vitis vinifera	NA	cell redox homeostasis[GO:0045454] ; oxidation-reduction process[GO:0055114]	electron carrier activity[GO:0009055] ; protein disulfide oxidoreductase activity[GO:0015035]	cell[GO:0005623]	NA
TR32322|c0_g1_i2	485	6.50395e-20	78	88.1965	225429716	PREDICTED: uncharacterized protein LOC100257698	Vitis vinifera	NA	NA	NA	NA	NA
TR30466|c1_g1_i1	255	2.98794e-33	89	120.168	225429797	PREDICTED: uncharacterized protein LOC100261165	Vitis vinifera	NA	NA	NA	NA	NA
TR30466|c1_g1_i2	461	2.85559e-32	89	120.168	225429797	PREDICTED: uncharacterized protein LOC100261165	Vitis vinifera	NA	NA	NA	NA	NA
TR29558|c0_g1_i1	458	4.07117e-93	99	281.952	225430912	PREDICTED: probable membrane-associated 30 kDa protein, chloroplastic	Vitis vinifera	NA	thylakoid membrane organization[GO:0010027]	NA	cytosol[GO:0005829] ; chloroplast thylakoid membrane[GO:0009535]	NA
TR37327|c0_g3_i1	236	3.94989e-50	100	164.466	225431061	PREDICTED: rac-like GTP-binding protein RHO1 isoform 1	Vitis vinifera	NA	small GTPase mediated signal transduction[GO:0007264]	GTP binding[GO:0005525]	intracellular[GO:0005622] ; membrane[GO:0016020]	NA
TR37886|c2_g3_i2	501	1.64213e-89	97	275.789	225431100	PREDICTED: 26S proteasome non-ATPase regulatory subunit 4	Vitis vinifera	NA	proteasome assembly[GO:0043248] ; proteasome-mediated ubiquitin-dependent protein catabolic process[GO:0043161]	polyubiquitin binding[GO:0031593]	proteasome regulatory particle, base subcomplex[GO:0008540] ; nucleus[GO:0005634] ; cytosol[GO:0005829]	NA
TR34275|c0_g1_i6	227	8.8856e-45	100	154.836	225431122	PREDICTED: ferredoxin--NADP reductase, leaf isozyme, chloroplastic isoform 1	Vitis vinifera	NA	negative regulation of defense response[GO:0031348] ; pentose-phosphate shunt[GO:0006098] ; detection of biotic stimulus[GO:0009595] ; jasmonic acid mediated signaling pathway[GO:0009867] ; salicylic acid biosynthetic process[GO:0009697] ; systemic acquired resistance, salicylic acid mediated signaling pathway[GO:0009862] ; positive regulation of catalytic activity[GO:0043085] ; regulation of pla…	oxidoreductase activity[GO:0016491] ; electron transporter, transferring electrons within the cyclic electron transport pathway of photosynthesis activity[GO:0045156] ; poly(U) RNA binding[GO:0008266] ; electron transporter, transferring electrons within the noncyclic electron transport pathway of photosynthesis activity[GO:0045157]	chloroplast envelope[GO:0009941] ; apoplast[GO:0048046] ; thylakoid lumen[GO:0031977] ; chloroplast thylakoid[GO:0009534]	NA
TR33060|c0_g1_i1	450	3.1193e-44	98	149.828	225431279	PREDICTED: uncharacterized protein LOC100267751	Vitis vinifera	NA	NA	NA	NA	NA
TR28301|c0_g1_i2	415	1.72446e-20	88	93.2041	225431871	PREDICTED: importin subunit alpha-1	Vitis vinifera	NA	NLS-bearing protein import into nucleus[GO:0006607]	protein transporter activity[GO:0008565] ; nuclear localization sequence binding[GO:0008139]	nuclear pore[GO:0005643] ; nucleoplasm[GO:0005654] ; cytosol[GO:0005829]	NA
TR38760|c2_g1_i2	422	1.96603e-19	90	90.5077	225431871	PREDICTED: importin subunit alpha-1	Vitis vinifera	NA	NLS-bearing protein import into nucleus[GO:0006607]	protein transporter activity[GO:0008565] ; nuclear localization sequence binding[GO:0008139]	nuclear pore[GO:0005643] ; nucleoplasm[GO:0005654] ; cytosol[GO:0005829]	NA
TR35371|c2_g1_i5	1090	2.31234e-20	58	96.6709	225432200	PREDICTED: uncharacterized protein LOC100242564	Vitis vinifera	NA	NA	binding[GO:0005488]	NA	NA
TR41195|c0_g1_i3	281	1.07903e-05	70	48.9062	225432416	PREDICTED: uncharacterized protein LOC100259554	Vitis vinifera	NA	NA	NA	NA	NA
TR41195|c0_g2_i2	437	3.16459e-05	70	48.521	225432416	PREDICTED: uncharacterized protein LOC100259554	Vitis vinifera	NA	NA	NA	NA	NA
TR38302|c0_g1_i2	366	3.83458e-57	96	186.808	225432530	PREDICTED: TVP38/TMEM64 family membrane protein slr0305	Vitis vinifera	NA	proline transport[GO:0015824]	NA	integral component of membrane[GO:0016021]	NA
TR37377|c0_g2_i3	979	1.11186e-149	90	432.95	225433728	PREDICTED: chitinase-like protein 2	Vitis vinifera	NA	carbohydrate metabolic process[GO:0005975] ; cell wall macromolecule catabolic process[GO:0016998] ; chitin catabolic process[GO:0006032]	chitinase activity[GO:0004568]	NA	map00520:Amino sugar and nucleotide sugar metabolism(chitodextrinase[ec:3.2.1.14])
TR35369|c0_g1_i2	460	6.73351e-30	87	118.242	225434189	PREDICTED: NADP-dependent alkenal double bond reductase P2	Vitis vinifera	NA	oxidation-reduction process[GO:0055114]	zinc ion binding[GO:0008270] ; oxidoreductase activity[GO:0016491]	NA	NA
TR37323|c2_g4_i12	316	3.73113e-45	91	156.377	225434488	PREDICTED: dihydroflavonol-4-reductase	Vitis vinifera	NA	glucosinolate biosynthetic process[GO:0019761]	coenzyme binding[GO:0050662] ; catalytic activity[GO:0003824]	cytosol[GO:0005829]	NA
TR31951|c0_g5_i1	296	6.43472e-35	80	129.413	225434488	PREDICTED: dihydroflavonol-4-reductase	Vitis vinifera	NA	glucosinolate biosynthetic process[GO:0019761]	coenzyme binding[GO:0050662] ; catalytic activity[GO:0003824]	cytosol[GO:0005829]	NA
TR38604|c0_g1_i1	285	1.00271e-19	81	88.9669	225434698	PREDICTED: zinc finger CCCH domain-containing protein 49-like	Vitis vinifera	NA	NA	NA	NA	NA
TR30552|c0_g2_i1	492	2.52753e-23	100	102.449	225435794	PREDICTED: ruBisCO large subunit-binding protein subunit beta, chloroplastic	Vitis vinifera	NA	protein refolding[GO:0042026]	ATP binding[GO:0005524]	cytoplasm[GO:0005737]	NA
TR31870|c2_g6_i1	395	4.8583e-27	81	107.842	225436938	PREDICTED: endo-1,3;1,4-beta-D-glucanase	Vitis vinifera	NA	metabolic process[GO:0008152]	hydrolase activity[GO:0016787]	NA	NA
TR34030|c1_g2_i2	647	1.18272e-142	95	407.912	225437209	PREDICTED: NADH dehydrogenase [ubiquinone] flavoprotein 2, mitochondrial	Vitis vinifera	NA	response to misfolded protein[GO:0051788] ; photorespiration[GO:0009853] ; mitochondrial electron transport, NADH to ubiquinone[GO:0006120] ; proteasome core complex assembly[GO:0080129] ; ubiquitin-dependent protein catabolic process[GO:0006511] ; response to oxidative stress[GO:0006979]	zinc ion binding[GO:0008270] ; NADH dehydrogenase (ubiquinone) activity[GO:0008137] ; 2 iron, 2 sulfur cluster binding[GO:0051537]	mitochondrial respiratory chain complex I[GO:0005747]	map00190:Oxidative phosphorylation(reductase (H+-translocating)[ec:1.6.5.3])
TR2816|c0_g1_i2	254	1.40531e-52	100	174.096	225439066	PREDICTED: cell division control protein 2 homolog C isoform 1	Vitis vinifera	NA	protein phosphorylation[GO:0006468]	protein kinase activity[GO:0004672] ; ATP binding[GO:0005524]	NA	NA
TR32918|c0_g1_i2	401	4.51625e-47	89	160.229	225439916	PREDICTED: cell number regulator 8-like	Vitis vinifera	NA	response to chitin[GO:0010200] ; N-terminal protein myristoylation[GO:0006499] ; amino acid transport[GO:0006865]	NA	NA	NA
TR32918|c0_g1_i1	632	1.69258e-46	90	161.77	225439916	PREDICTED: cell number regulator 8-like	Vitis vinifera	NA	response to chitin[GO:0010200] ; N-terminal protein myristoylation[GO:0006499] ; amino acid transport[GO:0006865]	NA	NA	NA
TR27628|c0_g4_i3	691	1.01284e-14	91	73.559	225439918	PREDICTED: DNA-binding protein S1FA2	Vitis vinifera	NA	regulation of transcription, DNA-templated[GO:0006355]	DNA binding[GO:0003677]	integral component of membrane[GO:0016021] ; nucleus[GO:0005634]	NA
TR29997|c2_g2_i2	644	1.02856e-85	100	259.996	225439982	PREDICTED: 60S ribosomal protein L12	Vitis vinifera	NA	translation[GO:0006412] ; ribosomal large subunit assembly[GO:0000027]	rRNA binding[GO:0019843] ; structural constituent of ribosome[GO:0003735]	cytosolic large ribosomal subunit[GO:0022625]	NA
TR32921|c0_g3_i3	409	2.65665e-38	90	134.035	225440755	PREDICTED: uncharacterized protein LOC100266492	Vitis vinifera	NA	NA	NA	NA	NA
TR32921|c0_g3_i2	656	6.74924e-37	90	133.65	225440755	PREDICTED: uncharacterized protein LOC100266492	Vitis vinifera	NA	NA	NA	NA	NA
TR26915|c0_g1_i2	1013	1.79345e-164	89	484.567	225441038	PREDICTED: probable leucine-rich repeat receptor-like protein kinase At1g68400 isoform 1	Vitis vinifera	NA	protein phosphorylation[GO:0006468]	protein kinase activity[GO:0004672] ; ATP binding[GO:0005524]	plasma membrane[GO:0005886] ; integral component of membrane[GO:0016021]	NA
TR40179|c3_g9_i1	578	7.48977e-58	69	193.356	225441373	PREDICTED: glucan endo-1,3-beta-glucosidase	Vitis vinifera	NA	NA	hydrolase activity[GO:0016787]	NA	NA
TR32913|c1_g1_i3	501	6.79608e-71	93	220.32	225441569	PREDICTED: mediator of RNA polymerase II transcription subunit 7	Vitis vinifera	NA	regulation of transcription from RNA polymerase II promoter[GO:0006357]	RNA polymerase II transcription cofactor activity[GO:0001104]	mediator complex[GO:0016592] ; core mediator complex[GO:0070847]	NA
TR32913|c1_g1_i2	787	4.1212e-54	93	181.03	225441569	PREDICTED: mediator of RNA polymerase II transcription subunit 7	Vitis vinifera	NA	regulation of transcription from RNA polymerase II promoter[GO:0006357]	RNA polymerase II transcription cofactor activity[GO:0001104]	mediator complex[GO:0016592] ; core mediator complex[GO:0070847]	NA
TR35359|c1_g1_i4	328	7.27906e-21	91	92.0485	225442665	PREDICTED: uncharacterized protein LOC100244623	Vitis vinifera	NA	NA	NA	NA	NA
TR44193|c1_g7_i1	232	1.09058e-30	83	120.553	225442715	PREDICTED: N-alpha-acetyltransferase 15, NatA auxiliary subunit	Vitis vinifera	NA	NA	NA	NA	NA
TR36623|c0_g3_i1	471	7.75478e-24	98	100.908	225442857	PREDICTED: biotin carboxyl carrier protein of acetyl-CoA carboxylase	Vitis vinifera	NA	NA	NA	NA	NA
TR32301|c0_g2_i6	321	4.90349e-39	75	137.117	225442922	PREDICTED: adenine phosphoribosyltransferase 2-like	Vitis vinifera	NA	NA	NA	NA	NA
TR26550|c0_g3_i1	351	1.17019e-36	86	127.872	225443150	PREDICTED: uncharacterized protein LOC100262209	Vitis vinifera	NA	NA	NA	integral component of membrane[GO:0016021]	NA
TR29617|c0_g3_i1	442	1.22796e-10	92	61.2326	225443233	PREDICTED: uncharacterized protein LOC100256982	Vitis vinifera	NA	NA	NA	NA	NA
TR41846|c0_g1_i1	400	2.42459e-34	86	130.568	225444161	PREDICTED: UDP-arabinose 4-epimerase 1	Vitis vinifera	NA	galactose metabolic process[GO:0006012]	UDP-glucose 4-epimerase activity[GO:0003978]	NA	map00052:Galactose metabolism(4-epimerase[ec:5.1.3.2]) ; map00520:Amino sugar and nucleotide sugar metabolism(4-epimerase[ec:5.1.3.2])
TR33729|c0_g2_i5	355	1.26477e-28	81	112.079	225444667	PREDICTED: chlorophyll a-b binding protein, chloroplastic	Vitis vinifera	NA	regulation of proton transport[GO:0010155] ; pentose-phosphate shunt[GO:0006098] ; cellular cation homeostasis[GO:0030003] ; protein-chromophore linkage[GO:0018298] ; response to sucrose[GO:0009744] ; isopentenyl diphosphate biosynthetic process, methylerythritol 4-phosphate pathway[GO:0019288] ; response to high light intensity[GO:0009644] ; divalent metal ion transport[GO:0070838] ; glucosinola…	pigment binding[GO:0031409] ; metal ion binding[GO:0046872] ; chlorophyll binding[GO:0016168]	photosystem I[GO:0009522] ; chloroplast envelope[GO:0009941] ; integral component of membrane[GO:0016021] ; photosystem II[GO:0009523] ; chloroplast thylakoid membrane[GO:0009535] ; plastoglobule[GO:0010287]	NA
TR33160|c0_g3_i4	734	2.66122e-77	84	241.121	225444740	PREDICTED: uncharacterized protein LOC100256155	Vitis vinifera	NA	NA	NA	NA	NA
TR33160|c0_g3_i6	665	6.65661e-67	88	213.772	225444740	PREDICTED: uncharacterized protein LOC100256155	Vitis vinifera	NA	NA	NA	NA	NA
TR33160|c0_g2_i2	581	5.60757e-60	86	194.897	225444740	PREDICTED: uncharacterized protein LOC100256155	Vitis vinifera	NA	NA	NA	NA	NA
TR33160|c0_g1_i1	322	2.45769e-29	87	112.464	225444740	PREDICTED: uncharacterized protein LOC100256155	Vitis vinifera	NA	NA	NA	NA	NA
TR24948|c0_g1_i1	628	3.26598e-43	71	149.828	225445302	PREDICTED: uncharacterized protein LOC100244080	Vitis vinifera	NA	cellular transition metal ion homeostasis[GO:0046916] ; metal ion transport[GO:0030001]	transition metal ion binding[GO:0046914]	cytoplasm[GO:0005737]	NA
TR42326|c0_g1_i8	2937	0	83	741.11	225445408	PREDICTED: potassium channel AKT1-like	Vitis vinifera	NA	NA	NA	NA	NA
TR2462|c0_g1_i7	901	2.92824e-95	86	288.5	225445565	PREDICTED: axial regulator YABBY 5	Vitis vinifera	NA	leaf morphogenesis[GO:0009965] ; cell differentiation[GO:0030154] ; positive regulation of transcription, DNA-templated[GO:0045893] ; chromatin assembly or disassembly[GO:0006333] ; plastid organization[GO:0009657] ; regulation of translation[GO:0006417]	transcription factor activity, sequence-specific DNA binding[GO:0003700]	NA	NA
TR2462|c0_g3_i2	429	6.70727e-80	90	242.662	225445565	PREDICTED: axial regulator YABBY 5	Vitis vinifera	NA	leaf morphogenesis[GO:0009965] ; cell differentiation[GO:0030154] ; positive regulation of transcription, DNA-templated[GO:0045893] ; chromatin assembly or disassembly[GO:0006333] ; plastid organization[GO:0009657] ; regulation of translation[GO:0006417]	transcription factor activity, sequence-specific DNA binding[GO:0003700]	NA	NA
TR3733|c1_g3_i1	258	7.26747e-49	93	160.999	225445565	PREDICTED: axial regulator YABBY 5	Vitis vinifera	NA	leaf morphogenesis[GO:0009965] ; cell differentiation[GO:0030154] ; positive regulation of transcription, DNA-templated[GO:0045893] ; chromatin assembly or disassembly[GO:0006333] ; plastid organization[GO:0009657] ; regulation of translation[GO:0006417]	transcription factor activity, sequence-specific DNA binding[GO:0003700]	NA	NA
TR3733|c1_g5_i4	324	3.61488e-25	90	100.908	225445565	PREDICTED: axial regulator YABBY 5	Vitis vinifera	NA	leaf morphogenesis[GO:0009965] ; cell differentiation[GO:0030154] ; positive regulation of transcription, DNA-templated[GO:0045893] ; chromatin assembly or disassembly[GO:0006333] ; plastid organization[GO:0009657] ; regulation of translation[GO:0006417]	transcription factor activity, sequence-specific DNA binding[GO:0003700]	NA	NA
TR35569|c0_g1_i4	397	2.67376e-36	98	133.265	225446349	PREDICTED: riboflavin synthase alpha chain	Vitis vinifera	NA	riboflavin biosynthetic process[GO:0009231] ; oxidation-reduction process[GO:0055114]	riboflavin synthase activity[GO:0004746] ; oxidoreductase activity[GO:0016491]	chloroplast[GO:0009507]	map00740:Riboflavin metabolism(synthase[ec:2.5.1.9])
TR35569|c0_g1_i10	363	4.67756e-36	97	132.109	225446349	PREDICTED: riboflavin synthase alpha chain	Vitis vinifera	NA	riboflavin biosynthetic process[GO:0009231] ; oxidation-reduction process[GO:0055114]	riboflavin synthase activity[GO:0004746] ; oxidoreductase activity[GO:0016491]	chloroplast[GO:0009507]	map00740:Riboflavin metabolism(synthase[ec:2.5.1.9])
TR32980|c0_g4_i1	447	5.12032e-29	78	114.39	225446775	PREDICTED: oxygen-evolving enhancer protein 2, chloroplastic	Vitis vinifera	NA	NA	NA	photosystem II[GO:0009523]	NA
TR42518|c0_g2_i1	428	2.55751e-09	97	61.2326	225446811	PREDICTED: vacuolar protein sorting-associated protein 16 homolog	Vitis vinifera	NA	xylan biosynthetic process[GO:0045492] ; regulation of vacuole fusion, non-autophagic[GO:0032889] ; protein targeting to vacuole[GO:0006623] ; regulation of SNARE complex assembly[GO:0035542] ; vacuole organization[GO:0007033] ; protein desumoylation[GO:0016926] ; endosomal transport[GO:0016197] ; Golgi organization[GO:0007030] ; protein N-linked glycosylation[GO:0006487] ; hydrogen peroxide bios…	actin binding[GO:0003779]	plant-type vacuole membrane[GO:0009705] ; lysosomal membrane[GO:0005765] ; HOPS complex[GO:0030897] ; endosome[GO:0005768]	NA
TR7744|c0_g3_i2	357	2.62674e-25	77	101.293	225447005	PREDICTED: uncharacterized protein LOC100241395	Vitis vinifera	NA	single-organism developmental process[GO:0044767]	NA	NA	NA
TR7744|c0_g3_i3	622	2.14475e-18	73	85.5001	225447005	PREDICTED: uncharacterized protein LOC100241395	Vitis vinifera	NA	single-organism developmental process[GO:0044767]	NA	NA	NA
TR23974|c0_g1_i3	421	8.82022e-35	80	124.405	225447651	PREDICTED: uncharacterized protein LOC100256196	Vitis vinifera	NA	NA	NA	NA	NA
TR34803|c0_g1_i2	683	3.59126e-75	77	236.884	225448412	PREDICTED: GDSL esterase/lipase CPRD49	Vitis vinifera	NA	NA	NA	NA	NA
TR25078|c1_g1_i7	568	3.10314e-55	100	179.874	225449319	PREDICTED: NHP2-like protein 1-like	Vitis vinifera	NA	ribosome biogenesis[GO:0042254]	RNA binding[GO:0003723]	nucleolus[GO:0005730] ; intracellular ribonucleoprotein complex[GO:0030529]	NA
TR42424|c0_g5_i1	312	1.28305e-63	92	209.149	225449360	PREDICTED: protein DA1-related 2	Vitis vinifera	NA	phloem development[GO:0010088] ; root development[GO:0048364]	ubiquitin binding[GO:0043130] ; zinc ion binding[GO:0008270]	NA	NA
TR36523|c0_g3_i1	226	9.89033e-43	97	147.132	225449374	PREDICTED: uncharacterized protein At2g39795, mitochondrial	Vitis vinifera	NA	NA	NA	mitochondrial matrix[GO:0005759]	NA
TR37222|c2_g1_i11	1488	2.62039e-95	83	166.392	225449647	PREDICTED: bark storage protein A	Vitis vinifera	NA	nucleoside metabolic process[GO:0009116]	catalytic activity[GO:0003824]	NA	NA
TR43167|c0_g8_i1	226	2.97169e-07	74	52.7582	225449963	PREDICTED: uncharacterized protein LOC100265442	Vitis vinifera	NA	NA	NA	NA	NA
TR27254|c0_g1_i1	553	1.43976e-19	84	85.5001	225450143	PREDICTED: uncharacterized protein LOC100263680 isoform 1	Vitis vinifera	NA	NA	NA	NA	NA
TR27254|c0_g1_i3	693	3.3036e-19	84	85.5001	225450143	PREDICTED: uncharacterized protein LOC100263680 isoform 1	Vitis vinifera	NA	NA	NA	NA	NA
TR42213|c1_g2_i2	395	6.53123e-41	89	148.288	225450795	PREDICTED: uncharacterized protein LOC100251003	Vitis vinifera	NA	protein ubiquitination[GO:0016567]	zinc ion binding[GO:0008270] ; ubiquitin-protein transferase activity[GO:0004842]	NA	NA
TR27306|c0_g1_i4	605	2.45339e-36	85	131.724	225451521	PREDICTED: glutaredoxin-C1	Vitis vinifera	NA	cell redox homeostasis[GO:0045454] ; oxidation-reduction process[GO:0055114]	electron carrier activity[GO:0009055] ; protein disulfide oxidoreductase activity[GO:0015035]	cell[GO:0005623]	NA
TR42885|c0_g2_i4	254	3.58161e-05	68	47.3654	225452214	PREDICTED: uncharacterized protein LOC100242361	Vitis vinifera	NA	NA	NA	NA	NA
TR34433|c1_g3_i2	280	7.04361e-11	53	63.1586	225452242	PREDICTED: uncharacterized protein LOC100254358	Vitis vinifera	NA	NA	NA	NA	NA
TR43948|c2_g2_i1	590	9.55939e-76	99	245.358	225452954	PREDICTED: probable galacturonosyltransferase 13-like	Vitis vinifera	NA	pectin biosynthetic process[GO:0045489] ; cell wall organization[GO:0071555]	polygalacturonate 4-alpha-galacturonosyltransferase activity[GO:0047262]	Golgi membrane[GO:0000139] ; integral component of membrane[GO:0016021]	map00500:Starch and sucrose metabolism(4-alpha-galacturonosyltransferase[ec:2.4.1.43]) ; map00520:Amino sugar and nucleotide sugar metabolism(4-alpha-galacturonosyltransferase[ec:2.4.1.43])
TR28455|c0_g1_i1	978	2.99875e-69	82	224.172	225453002	PREDICTED: uncharacterized protein LOC100253609	Vitis vinifera	NA	NA	NA	NA	NA
TR3765|c0_g1_i2	776	1.96986e-105	98	312.768	225454282	PREDICTED: ubiquitin-conjugating enzyme E2 5	Vitis vinifera	NA	protein ubiquitination[GO:0016567] ; ubiquitin-dependent protein catabolic process[GO:0006511]	ubiquitin protein ligase binding[GO:0031625] ; ubiquitin protein ligase activity[GO:0061630] ; ATP binding[GO:0005524]	cytoplasm[GO:0005737]	NA
TR3765|c0_g1_i1	304	8.8885e-45	100	151.369	225454282	PREDICTED: ubiquitin-conjugating enzyme E2 5	Vitis vinifera	NA	protein ubiquitination[GO:0016567] ; ubiquitin-dependent protein catabolic process[GO:0006511]	ubiquitin protein ligase binding[GO:0031625] ; ubiquitin protein ligase activity[GO:0061630] ; ATP binding[GO:0005524]	cytoplasm[GO:0005737]	NA
TR29587|c0_g1_i4	565	5.90668e-42	90	115.931	225454326	PREDICTED: uncharacterized protein LOC100258452	Vitis vinifera	NA	NA	NA	NA	NA
TR32838|c2_g1_i4	313	1.19376e-19	91	88.5817	225454328	PREDICTED: CAAX prenyl protease 1 homolog	Vitis vinifera	NA	CAAX-box protein processing[GO:0071586] ; ER to Golgi vesicle-mediated transport[GO:0006888]	metalloendopeptidase activity[GO:0004222]	vacuole[GO:0005773] ; integral component of membrane[GO:0016021]	NA
TR3937|c0_g5_i1	243	9.91784e-44	98	144.821	225454559	PREDICTED: N-alpha-acetyltransferase 38, NatC auxiliary subunit	Vitis vinifera	NA	NA	NA	NA	NA
TR35263|c0_g2_i2	386	2.82851e-33	83	127.487	225454801	PREDICTED: protein SMG9	Vitis vinifera	NA	NA	NA	NA	NA
TR35209|c0_g2_i1	424	1.70773e-84	92	263.462	225455177	PREDICTED: uncharacterized calcium-binding protein At1g02270	Vitis vinifera	NA	NA	NA	NA	NA
TR42126|c0_g1_i5	366	2.92891e-27	83	110.923	225455598	PREDICTED: xyloglucan galactosyltransferase KATAMARI1 homolog	Vitis vinifera	NA	xyloglucan biosynthetic process[GO:0009969] ; glucose catabolic process[GO:0006007]	galactosyltransferase activity[GO:0008378]	Golgi apparatus[GO:0005794] ; integral component of membrane[GO:0016021]	NA
TR31627|c0_g3_i1	269	1.64541e-49	96	163.31	225455966	PREDICTED: 40S ribosomal protein S7 isoform 1	Vitis vinifera	NA	translation[GO:0006412]	structural constituent of ribosome[GO:0003735]	ribosome[GO:0005840]	NA
TR8164|c0_g5_i1	469	9.50922e-15	70	77.7962	225456004	PREDICTED: stromal 70 kDa heat shock-related protein, chloroplastic-like	Vitis vinifera	NA	NA	binding[GO:0005488]	NA	NA
TR37439|c2_g1_i2	1458	2.5719e-135	77	404.831	225456741	PREDICTED: transcription factor TCP15-like	Vitis vinifera	NA	single-organism process[GO:0044699] ; response to hormone[GO:0009725] ; response to acid chemical[GO:0001101] ; response to oxygen-containing compound[GO:1901700] ; regulation of biological process[GO:0050789] ; response to lipid[GO:0033993]	NA	NA	NA
TR37439|c2_g1_i1	376	5.47371e-37	76	136.732	225456741	PREDICTED: transcription factor TCP15-like	Vitis vinifera	NA	single-organism process[GO:0044699] ; response to hormone[GO:0009725] ; response to acid chemical[GO:0001101] ; response to oxygen-containing compound[GO:1901700] ; regulation of biological process[GO:0050789] ; response to lipid[GO:0033993]	NA	NA	NA
TR38785|c0_g4_i4	592	2.9136e-73	91	234.572	225457425	PREDICTED: uncharacterized protein LOC100260374	Vitis vinifera	NA	NA	NA	NA	NA
TR1484|c0_g1_i1	239	6.55537e-43	97	150.599	225457441	PREDICTED: 26S proteasome non-ATPase regulatory subunit 6	Vitis vinifera	NA	response to cytokinin[GO:0009735] ; response to misfolded protein[GO:0051788] ; fatty acid beta-oxidation[GO:0006635] ; protein maturation[GO:0051604] ; toxin catabolic process[GO:0009407] ; proteasome core complex assembly[GO:0080129] ; regulation of unidimensional cell growth[GO:0051510] ; root hair elongation[GO:0048767] ; cullin deneddylation[GO:0010388] ; photomorphogenesis[GO:0009640] ; pro…	NA	cytosol[GO:0005829] ; plasma membrane[GO:0005886] ; nucleus[GO:0005634]	NA
TR38639|c0_g1_i5	489	5.02376e-51	80	177.563	225457644	PREDICTED: short-chain dehydrogenase/reductase family 42E member 1	Vitis vinifera	NA	steroid biosynthetic process[GO:0006694] ; oxidation-reduction process[GO:0055114]	3-beta-hydroxy-delta5-steroid dehydrogenase activity[GO:0003854]	integral component of membrane[GO:0016021] ; endoplasmic reticulum[GO:0005783]	map00984:Steroid degradation(dehydrogenase[ec:1.1.1.145]) ; map00140:Steroid hormone biosynthesis(dehydrogenase[ec:1.1.1.145])
TR3977|c0_g1_i7	888	2.76501e-74	94	236.884	225457739	PREDICTED: uncharacterized protein LOC100253998	Vitis vinifera	NA	cellular oxidant detoxification[GO:0098869] ; thylakoid membrane organization[GO:0010027] ; oxidation-reduction process[GO:0055114]	antioxidant activity[GO:0016209] ; oxidoreductase activity[GO:0016491]	chloroplast[GO:0009507]	NA
TR3977|c0_g1_i10	523	2.94929e-50	89	170.244	225457739	PREDICTED: uncharacterized protein LOC100253998	Vitis vinifera	NA	cellular oxidant detoxification[GO:0098869] ; thylakoid membrane organization[GO:0010027] ; oxidation-reduction process[GO:0055114]	antioxidant activity[GO:0016209] ; oxidoreductase activity[GO:0016491]	chloroplast[GO:0009507]	NA
TR44557|c3_g2_i4	278	4.49491e-55	98	189.119	225458382	PREDICTED: leishmanolysin-like peptidase	Vitis vinifera	NA	cell adhesion[GO:0007155] ; proteolysis[GO:0006508]	metalloendopeptidase activity[GO:0004222]	membrane[GO:0016020]	NA
TR2644|c0_g1_i4	444	6.04605e-59	97	189.889	225458850	PREDICTED: pollen-specific protein SF3	Vitis vinifera	NA	actin filament bundle assembly[GO:0051017]	actin filament binding[GO:0051015] ; zinc ion binding[GO:0008270]	plasma membrane[GO:0005886]	NA
TR38615|c0_g2_i1	1861	0	80	436.032	225458880	PREDICTED: 70 kDa peptidyl-prolyl isomerase	Vitis vinifera	NA	protein peptidyl-prolyl isomerization[GO:0000413] ; chaperone-mediated protein folding[GO:0061077]	FK506 binding[GO:0005528] ; peptidyl-prolyl cis-trans isomerase activity[GO:0003755]	endoplasmic reticulum membrane[GO:0005789]	NA
TR40318|c0_g6_i1	358	1.10416e-55	98	182.57	225459959	PREDICTED: RNA-binding protein 38	Vitis vinifera	NA	NA	NA	NA	NA
TR40318|c0_g2_i1	232	1.95642e-36	98	130.954	225459959	PREDICTED: RNA-binding protein 38	Vitis vinifera	NA	NA	NA	NA	NA
TR32374|c0_g1_i2	636	1.49483e-104	88	312.768	225460195	PREDICTED: uncharacterized protein LOC100255018	Vitis vinifera	NA	xylan biosynthetic process[GO:0045492]	NA	NA	NA
TR2598|c0_g2_i1	537	8.79223e-44	91	152.525	225461981	PREDICTED: UPF0172 protein At5g55940	Vitis vinifera	NA	NA	NA	NA	NA
TR31364|c0_g1_i2	788	8.83165e-74	80	233.032	225462634	PREDICTED: miraculin	Vitis vinifera	NA	negative regulation of endopeptidase activity[GO:0010951]	endopeptidase inhibitor activity[GO:0004866]	NA	NA
TR40454|c0_g3_i3	1175	7.00875e-174	94	498.434	225462735	PREDICTED: probable protein phosphatase 2C 76	Vitis vinifera	NA	root hair elongation[GO:0048767] ; protein dephosphorylation[GO:0006470]	metal ion binding[GO:0046872] ; protein serine/threonine phosphatase activity[GO:0004722]	NA	NA
TR40454|c0_g3_i2	1201	9.82162e-174	94	498.434	225462735	PREDICTED: probable protein phosphatase 2C 76	Vitis vinifera	NA	root hair elongation[GO:0048767] ; protein dephosphorylation[GO:0006470]	metal ion binding[GO:0046872] ; protein serine/threonine phosphatase activity[GO:0004722]	NA	NA
TR28845|c0_g1_i2	230	1.70602e-22	95	92.0485	225463039	PREDICTED: 40S ribosomal protein S11	Vitis vinifera	NA	translation[GO:0006412]	structural constituent of ribosome[GO:0003735]	ribosome[GO:0005840]	NA
TR38104|c1_g1_i1	808	4.81851e-132	95	276.559	225463508	PREDICTED: uridine kinase-like protein 4	Vitis vinifera	NA	CTP salvage[GO:0044211] ; pyrimidine nucleobase metabolic process[GO:0006206] ; UMP salvage[GO:0044206] ; phosphorylation[GO:0016310]	uridine kinase activity[GO:0004849] ; ATP binding[GO:0005524]	cytosol[GO:0005829]	map00983:Drug metabolism - other enzymes(kinase[ec:2.7.1.48]) ; map00240:Pyrimidine metabolism(kinase[ec:2.7.1.48])
TR31481|c0_g4_i1	302	6.02172e-35	100	126.331	225465202	PREDICTED: ras-related protein RABD1	Vitis vinifera	NA	small GTPase mediated signal transduction[GO:0007264] ; ER to Golgi vesicle-mediated transport[GO:0006888] ; protein transport[GO:0015031]	myosin XI tail binding[GO:0080115] ; GTP-dependent protein binding[GO:0030742] ; GTP binding[GO:0005525]	trans-Golgi network membrane[GO:0032588] ; plasma membrane[GO:0005886]	NA
TR31159|c0_g2_i1	362	3.79835e-17	100	78.5666	225465210	PREDICTED: cytochrome c	Vitis vinifera	NA	mitochondrial electron transport, ubiquinol to cytochrome c[GO:0006122] ; mitochondrial electron transport, cytochrome c to oxygen[GO:0006123]	metal ion binding[GO:0046872] ; electron carrier activity[GO:0009055] ; heme binding[GO:0020037]	mitochondrial intermembrane space[GO:0005758] ; respiratory chain[GO:0070469]	NA
TR39886|c1_g4_i7	657	1.08856e-112	94	333.183	225465306	PREDICTED: uncharacterized protein LOC100265963	Vitis vinifera	NA	NA	NA	NA	NA
TR32499|c0_g1_i1	2096	0	72	710.679	225465369	PREDICTED: protein ETHYLENE INSENSITIVE 3-like	Vitis vinifera	NA	NA	NA	NA	NA
TR32499|c0_g1_i16	671	2.05474e-71	89	237.269	225465369	PREDICTED: protein ETHYLENE INSENSITIVE 3-like	Vitis vinifera	NA	regulation of transcription, DNA-templated[GO:0006355]	transcription factor activity, sequence-specific DNA binding[GO:0003700]	nucleus[GO:0005634]	NA
TR32499|c0_g1_i2	454	1.06302e-43	85	158.688	225465369	PREDICTED: protein ETHYLENE INSENSITIVE 3-like	Vitis vinifera	NA	regulation of transcription, DNA-templated[GO:0006355]	transcription factor activity, sequence-specific DNA binding[GO:0003700]	nucleus[GO:0005634]	NA
TR35325|c0_g4_i1	515	2.55744e-35	84	136.346	225465369	PREDICTED: protein ETHYLENE INSENSITIVE 3-like	Vitis vinifera	NA	regulation of transcription, DNA-templated[GO:0006355]	transcription factor activity, sequence-specific DNA binding[GO:0003700]	nucleus[GO:0005634]	NA
TR27889|c0_g1_i1	1992	2.28157e-87	58	289.656	225465425	PREDICTED: uncharacterized protein LOC100241465	Vitis vinifera	NA	NA	NA	NA	NA
TR21361|c0_g1_i2	1066	1.75513e-27	57	118.242	225465425	PREDICTED: uncharacterized protein LOC100241465	Vitis vinifera	NA	NA	NA	NA	NA
TR30363|c0_g3_i7	581	2.86805e-19	100	85.1149	225465471	PREDICTED: uncharacterized protein LOC100256861	Vitis vinifera	NA	NA	NA	mitochondrial respiratory chain complex I[GO:0005747]	NA
TR30363|c0_g3_i2	568	3.0241e-19	100	85.1149	225465471	PREDICTED: uncharacterized protein LOC100256861	Vitis vinifera	NA	NA	NA	mitochondrial respiratory chain complex I[GO:0005747]	NA
TR7773|c0_g1_i1	258	3.13817e-43	91	149.443	225465508	PREDICTED: probable CCR4-associated factor 1 homolog 7 isoform 1	Vitis vinifera	NA	negative regulation of translation[GO:0017148] ; RNA phosphodiester bond hydrolysis, exonucleolytic[GO:0090503] ; exonucleolytic nuclear-transcribed mRNA catabolic process involved in deadenylation-dependent decay[GO:0043928]	nucleic acid binding[GO:0003676] ; poly(A)-specific ribonuclease activity[GO:0004535]	cytoplasmic mRNA processing body[GO:0000932] ; CCR4-NOT core complex[GO:0030015] ; nucleus[GO:0005634]	NA
TR34102|c0_g2_i5	810	9.29141e-54	65	186.808	225465766	PREDICTED: RING-H2 finger protein ATL54	Vitis vinifera	NA	NA	NA	NA	NA
TR30897|c1_g2_i4	723	6.71606e-66	89	209.149	225466165	PREDICTED: uncharacterized protein At5g64816 isoform 1	Vitis vinifera	NA	NA	NA	integral component of membrane[GO:0016021]	NA
TR41025|c1_g6_i1	331	1.8195e-20	88	92.0485	225468725	PREDICTED: sphingosine-1-phosphate lyase	Vitis vinifera	NA	proteasome-mediated ubiquitin-dependent protein catabolic process[GO:0043161] ; response to misfolded protein[GO:0051788] ; proteasome core complex assembly[GO:0080129] ; fatty acid beta-oxidation[GO:0006635] ; ER to Golgi vesicle-mediated transport[GO:0006888] ; sphingolipid catabolic process[GO:0030149] ; toxin catabolic process[GO:0009407]	pyridoxal phosphate binding[GO:0030170] ; carboxy-lyase activity[GO:0016831]	cytoplasm[GO:0005737]	NA
TR30918|c2_g3_i8	908	1.59544e-69	89	221.476	225469306	PREDICTED: ycf20-like protein isoform 2	Vitis vinifera	NA	nonphotochemical quenching[GO:0010196]	NA	integral component of membrane[GO:0016021] ; chloroplast[GO:0009507]	NA
TR30918|c2_g3_i2	943	2.26555e-69	89	221.476	225469306	PREDICTED: ycf20-like protein isoform 2	Vitis vinifera	NA	nonphotochemical quenching[GO:0010196]	NA	integral component of membrane[GO:0016021] ; chloroplast[GO:0009507]	NA
TR30918|c2_g3_i9	992	3.85533e-69	89	221.476	225469306	PREDICTED: ycf20-like protein isoform 2	Vitis vinifera	NA	nonphotochemical quenching[GO:0010196]	NA	integral component of membrane[GO:0016021] ; chloroplast[GO:0009507]	NA
TR31989|c0_g1_i2	816	7.21551e-94	79	290.426	225469346	PREDICTED: chitotriosidase-1	Vitis vinifera	NA	carbohydrate metabolic process[GO:0005975] ; chitin catabolic process[GO:0006032]	chitinase activity[GO:0004568] ; chitin binding[GO:0008061]	extracellular region[GO:0005576]	map00520:Amino sugar and nucleotide sugar metabolism(chitodextrinase[ec:3.2.1.14])
TR24922|c0_g1_i1	852	4.66298e-76	71	239.965	225469402	PREDICTED: probable glutathione S-transferase parC isoform 1	Vitis vinifera	NA	toxin catabolic process[GO:0009407] ; glutathione metabolic process[GO:0006749]	glutathione transferase activity[GO:0004364]	cytoplasm[GO:0005737]	map00480:Glutathione metabolism(transferase[ec:2.5.1.18]) ; map00982:Drug metabolism - cytochrome P450(transferase[ec:2.5.1.18]) ; map00980:Metabolism of xenobiotics by cytochrome P450(transferase[ec:2.5.1.18])
TR31798|c0_g3_i1	450	2.41069e-14	69	75.0998	225469850	PREDICTED: uncharacterized protein LOC100265608	Vitis vinifera	NA	NA	NA	NA	NA
TR14979|c0_g1_i2	248	2.1215e-53	98	174.866	225580053	expansin	Rehmannia glutinosa	NA	plant-type cell wall organization[GO:0009664]	NA	extracellular region[GO:0005576] ; cell wall[GO:0005618] ; membrane[GO:0016020]	NA
TR7956|c2_g1_i1	305	7.50729e-44	93	151.369	225580053	expansin	Rehmannia glutinosa	NA	plant-type cell wall organization[GO:0009664]	NA	extracellular region[GO:0005576] ; cell wall[GO:0005618] ; membrane[GO:0016020]	NA
TR2189|c0_g1_i1	1027	1.71833e-127	97	373.244	225580057	leucine-rich repeat protein	Solenostemon scutellarioides	NA	protein phosphorylation[GO:0006468]	transmembrane receptor protein kinase activity[GO:0019199]	NA	NA
TR27118|c0_g1_i2	574	1.23136e-74	96	232.646	225580057	leucine-rich repeat protein	Solenostemon scutellarioides	NA	protein phosphorylation[GO:0006468]	transmembrane receptor protein kinase activity[GO:0019199]	NA	NA
TR34869|c0_g3_i3	1004	0	91	538.11	225580059	chloroplast ribulose-1,5-bisphosphate carboxylase/oxygenase activase	Solenostemon scutellarioides	NA	NA	ATP binding[GO:0005524]	NA	NA
TR34869|c0_g3_i1	677	3.06243e-108	89	327.405	225580059	chloroplast ribulose-1,5-bisphosphate carboxylase/oxygenase activase	Solenostemon scutellarioides	NA	NA	ATP binding[GO:0005524]	NA	NA
TR34869|c0_g1_i1	713	6.72869e-102	98	311.612	225580059	chloroplast ribulose-1,5-bisphosphate carboxylase/oxygenase activase	Solenostemon scutellarioides	NA	NA	ATP binding[GO:0005524]	NA	NA
TR39822|c0_g4_i1	351	9.44427e-76	99	235.343	225735188	protein kinase-coding resistance protein	Nicotiana repanda	NA	protein phosphorylation[GO:0006468]	ATP binding[GO:0005524] ; protein serine/threonine kinase activity[GO:0004674]	NA	NA
TR7683|c0_g1_i3	703	5.10843e-113	96	330.872	226001035	xyloglucan endotransglycosylase/hydrolase	Torenia fournieri	NA	cellular glucan metabolic process[GO:0006073]	hydrolase activity, hydrolyzing O-glycosyl compounds[GO:0004553] ; xyloglucan:xyloglucosyl transferase activity[GO:0016762]	apoplast[GO:0048046] ; cell wall[GO:0005618]	NA
TR21406|c0_g1_i4	444	7.42928e-76	93	232.646	226001035	xyloglucan endotransglycosylase/hydrolase	Torenia fournieri	NA	cellular glucan metabolic process[GO:0006073]	hydrolase activity, hydrolyzing O-glycosyl compounds[GO:0004553] ; xyloglucan:xyloglucosyl transferase activity[GO:0016762]	apoplast[GO:0048046] ; cell wall[GO:0005618]	NA
TR21406|c0_g1_i3	639	8.65684e-75	93	232.646	226001035	xyloglucan endotransglycosylase/hydrolase	Torenia fournieri	NA	cellular glucan metabolic process[GO:0006073]	hydrolase activity, hydrolyzing O-glycosyl compounds[GO:0004553] ; xyloglucan:xyloglucosyl transferase activity[GO:0016762]	apoplast[GO:0048046] ; cell wall[GO:0005618]	NA
TR39353|c0_g2_i1	527	6.74912e-111	97	327.405	226247049	3-phosphoglycerate kinase, partial	Elymus libanoticus	NA	glycolytic process[GO:0006096]	phosphoglycerate kinase activity[GO:0004618]	NA	map01130:Biosynthesis of antibiotics(kinase[ec:2.7.2.3]) ; map00710:Carbon fixation in photosynthetic organisms(kinase[ec:2.7.2.3]) ; map00010:Glycolysis / Gluconeogenesis(kinase[ec:2.7.2.3])
TR41250|c0_g2_i1	306	1.68356e-45	94	154.066	226424080	epsilon carotene hydroxylase	Actinidia chinensis	NA	oxidation-reduction process[GO:0055114]	heme binding[GO:0020037] ; oxidoreductase activity, acting on paired donors, with incorporation or reduction of molecular oxygen[GO:0016705] ; monooxygenase activity[GO:0004497] ; iron ion binding[GO:0005506]	NA	NA
TR34080|c2_g3_i1	834	6.54867e-160	94	471.085	226434344	NADPH:cytochrome P450 reductase	Solenostemon scutellarioides	NA	oxidation-reduction process[GO:0055114]	iron ion binding[GO:0005506] ; NADPH-hemoprotein reductase activity[GO:0003958] ; FMN binding[GO:0010181]	integral component of membrane[GO:0016021]	NA
TR34121|c0_g1_i1	240	2.69541e-48	98	168.703	226434344	NADPH:cytochrome P450 reductase	Solenostemon scutellarioides	NA	oxidation-reduction process[GO:0055114]	iron ion binding[GO:0005506] ; NADPH-hemoprotein reductase activity[GO:0003958] ; FMN binding[GO:0010181]	integral component of membrane[GO:0016021]	NA
TR36861|c1_g2_i2	224	3.97388e-43	100	147.902	226438618	chalcone synthase C, partial	Sarmienta repens	NA	biosynthetic process[GO:0009058]	transferase activity, transferring acyl groups[GO:0016746]	NA	NA
TR2214|c3_g11_i1	309	1.93603e-38	79	138.272	226499354	polyubiquitin containing 7 ubiquitin monomers	Zea mays	NA	ubiquitin-dependent protein catabolic process[GO:0006511]	NA	cytoplasm[GO:0005737]	NA
TR34242|c0_g1_i2	476	1.21108e-99	98	300.056	226504612	uncharacterized protein LOC100274218	Zea mays	NA	metabolic process[GO:0008152]	ATP binding[GO:0005524] ; hydrolase activity[GO:0016787]	NA	NA
TR30990|c1_g2_i1	279	1.697e-47	95	155.606	226529519	uncharacterized protein LOC100280013	Zea mays	NA	metabolic process[GO:0008152]	ATPase activity[GO:0016887] ; ATP binding[GO:0005524]	NA	map00230:Purine metabolism(adenylpyrophosphatase[ec:3.6.1.3])
TR33625|c0_g6_i2	755	3.22704e-84	99	258.07	227206242	AT5G11200	Arabidopsis thaliana	NA	NA	NA	NA	NA
TR33625|c0_g5_i1	236	2.97357e-51	100	166.777	227206242	AT5G11200	Arabidopsis thaliana	NA	NA	NA	NA	NA
[truncated: 74,924 more rows]

## Sheet: F1
Transcript ID	Transcript length	E-Value	Similarity	Bit-Score	Blast Hit ID	Hit Description	Hit Organism	Family	Gene Ontology (Biological Process)	Gene Ontology (Molecular Function)	Gene Ontology (Cellular Component)	Pathway
[truncated: 76,917 more rows]

[truncated: 2 more sheets: OB_P1, OK_P2]
