# Supplementary material for: Altered Developmental and Metabolic Gene Expression in Basil Interspecific Hybrids
Source: Plants (Basel). 2022 Jul 18;11(14):1873. doi: 10.3390/plants11141873 (PMC9321874; doi:10.3390/plants11141873)
Supplement: Supplementary file 1 [file plants-11-01873-s001.zip › Table S3_DEGs co-regulated.xlsx]

## Sheet: Common Transcripts
Transcript ID	log2FoldChange( OB_P1 Vs. AMPHID2 )	log2FoldChange( OK_P2 Vs. AMPHID2 )	log2FoldChange( F1 Vs. AMPHID2 )
TR32762|c0_g1_i1	1.24915	-1.33763	-0.19463
TR36861|c1_g1_i1	-1.64862	-0.342392	-1.1791
TR26397|c1_g2_i1	0.79032	-3.3178	-0.102552
TR34949|c1_g1_i1	-1.16713	-0.327362	-0.376812
TR41839|c1_g3_i2	-0.784271	-0.0703893	-0.328557
TR27425|c0_g1_i2	-0.521237	0.0840643	-0.0357751
TR38750|c0_g2_i1	1.77644	0.616671	0.478798
TR2793|c0_g4_i7	-0.0706037	-0.568304	-0.302611
TR2793|c0_g7_i5	-0.630694	-0.554303	-0.417811
TR37309|c1_g2_i1	-0.701809	0	-0.564271
TR34949|c1_g4_i4	0.934547	-0.263034	0.179238
TR23935|c0_g1_i1	-0.299769	0.353918	0.234404
TR43997|c0_g2_i1	-0.691461	0.270206	0.45585
TR42436|c0_g3_i2	-0.328295	0.186701	0.7642
TR38766|c0_g1_i2	0.681256	-0.297434	0.227965
TR30057|c0_g2_i1	-0.306224	0.440573	-0.573669
TR43738|c0_g9_i1	0.417747	-0.32636	0.6634
TR43326|c0_g1_i1	-0.154915	-0.241301	0.80137
TR39848|c0_g6_i1	-0.954196	-0.800691	-0.066636
TR34256|c0_g6_i1	0.0506694	-0.302563	0.176235
TR25987|c0_g4_i1	-0.602068	0.29956	-0.134179
TR43347|c2_g3_i2	-0.32484	-0.436099	0.212624
TR30848|c1_g1_i3	-0.35685	0.711875	-0.401903
TR30848|c1_g5_i3	-0.327893	-0.782409	-0.140112
TR2214|c3_g4_i1	0.358687	-0.82415	-0.113698
TR16651|c0_g1_i1	-0.73153	-0.0951572	-0.242901
TR37305|c0_g3_i3	-2.12776	0.483679	-0.132382
TR43594|c1_g7_i2	-0.589255	1.36678	-0.326186
TR42805|c1_g6_i4	0.231326	0	-0.459801
TR42805|c1_g6_i2	0.092154	0.0424353	-0.220969
TR38406|c3_g1_i2	-0.733645	0.473497	-0.0009451
TR31737|c0_g1_i1	1.09615	0.295456	0.774254
TR7973|c0_g6_i2	-0.555107	0.0675068	0.283683
TR7973|c0_g6_i4	-0.427981	-0.0971879	0.202545
TR2514|c1_g9_i3	-0.328868	0.515458	-0.0275797
TR42642|c1_g1_i3	-0.81763	0.148702	-0.299988
TR34258|c1_g3_i3	0.577313	-0.368495	0.35461
TR43014|c4_g3_i3	-0.668794	-1	-0.582602
TR43014|c4_g1_i1	1.7956	1.25964	0.00147631
TR43014|c4_g3_i6	-1.29242	0.209453	-0.543922
TR43014|c4_g3_i7	-0.35266	-0.917538	-0.43874
TR27815|c2_g1_i3	-1.06313	-1.16338	-0.173279
TR30008|c0_g1_i2	0.0745526	-1.1822	-0.284904
TR24701|c0_g2_i2	-0.199309	1.90689	0.871116
TR7445|c0_g2_i1	0.405071	-0.161155	-0.084338
TR24701|c0_g1_i1	0.484664	-0.740913	-0.0214867
TR34949|c1_g4_i3	-0.949331	-0.165059	0.102235
TR32275|c2_g3_i2	0.137726	0.254573	-0.15442
TR37327|c0_g11_i1	-1.78427	-0.469485	-0.521202
TR43910|c2_g3_i1	0.82926	0.0379679	0.464299
TR31904|c0_g1_i1	-1.33681	-0.343954	-0.0264372
TR36629|c0_g2_i1	0.121211	-0.321928	0.217171
TR40615|c0_g1_i2	-0.106199	-0.0921937	0.452803
TR2541|c0_g2_i2	-0.185503	0.584963	0.329105
TR31018|c0_g1_i1	0.818401	-0.147368	-0.0945371
TR29478|c0_g1_i3	-1.58301	0.649719	0.257485
TR41381|c0_g1_i1	-0.182235	-1.08854	0.122654
TR42805|c1_g2_i1	-0.255892	-1.53051	-0.314751
TR44226|c1_g3_i1	-0.0737779	0.155278	0.359216
TR42558|c1_g1_i7	-0.343699	0.131245	-0.241094
TR42558|c1_g1_i2	-0.336812	0.282035	-0.418391
TR33439|c0_g5_i9	0.392937	-0.972106	0.354689
TR33439|c0_g5_i5	2.8098	-2.30256	-0.319144
TR2564|c0_g1_i1	0.113281	-0.108706	0.259311
TR37644|c0_g5_i1	1.50113	0.252387	0.895161
TR37644|c0_g6_i1	-0.476924	0.593	0.536079
TR41835|c0_g2_i1	0.0416993	0.932886	-0.395671
TR32520|c0_g1_i1	0.110713	-0.178597	0.628824
TR39166|c0_g4_i3	0.995707	-1	0.258777
TR34303|c1_g5_i2	-2.12531	-2.078	-1.0967
TR42645|c1_g3_i1	0.42218	-1.11548	0.170676
TR35271|c1_g2_i3	3.45985	0.707819	-1.75567
TR39531|c1_g6_i2	0.0351564	-0.443607	-0.165721
TR2744|c0_g3_i5	0.266355	-0.485427	0.693811
TR44694|c0_g2_i1	-1.67324	0.111031	0.0637606
TR33708|c0_g3_i1	-0.746797	1	0.400796
TR33708|c0_g1_i2	0.211269	0.294356	0.846307
TR33708|c0_g1_i1	0.433663	0.0490135	0.988612
TR39597|c1_g6_i2	1.07702	1.078	0.272347
TR28872|c0_g1_i1	0.146799	-0.285561	0.142832
TR41742|c1_g3_i2	0.648688	0.722466	0.829295
TR26631|c0_g1_i3	-0.552946	0.743225	0.295086
TR41742|c1_g3_i1	0.487192	-0.430144	0.358381
TR28629|c0_g2_i1	-0.784271	0.115477	0.648723
TR41742|c1_g2_i7	0.42218	-1	-0.466754
TR41742|c1_g2_i2	-0.0773183	0.281771	0.0206919
TR41742|c1_g2_i4	-0.297489	-0.49304	-0.139773
TR31669|c0_g1_i1	-0.364368	-0.509014	-0.191496
TR42231|c0_g7_i1	0.780513	-1.848	0.179238
TR43983|c2_g1_i3	-0.316878	0.0493277	-0.181817
TR36672|c1_g11_i1	-0.941813	0.545741	0.144379
TR7423|c0_g1_i1	-0.199309	0.807355	0.286153
TR39143|c1_g6_i8	0.527024	-0.337566	-0.225746
TR36861|c1_g2_i5	-1.54867	-0.466527	-1.01937
TR30035|c1_g1_i1	0.254723	0.0196288	0.333368
TR34263|c0_g1_i2	-0.8203	-0.702868	-0.703716
TR44082|c2_g7_i3	-1.93627	0.574236	-0.700172
TR44082|c2_g7_i1	-0.215076	0.465123	-0.552911
TR41470|c1_g10_i1	-0.241129	-0.959358	0.0219404
TR43986|c2_g5_i1	0.571209	-1.97199	-0.521202
TR28049|c1_g1_i2	-2.83872	-0.0360693	-0.369199
TR40182|c2_g2_i1	-0.7244	-0.560715	-0.73142
TR39879|c0_g2_i2	-0.898307	0.291604	-0.0946688
TR40550|c0_g1_i6	0.0264583	-0.230298	0.162771
TR34275|c0_g3_i4	1.08556	-2.2837	0.245514
TR43084|c0_g1_i5	-0.507431	0	0.00717706
TR7306|c0_g1_i3	-0.764794	-0.431	0.166468
TR43009|c2_g4_i2	-1.93445	0.199486	0.258461
TR41859|c0_g8_i1	0.34718	0.0374747	0.488258
TR38266|c1_g1_i2	0.0293156	0.336428	-0.521202
TR38266|c1_g1_i9	-0.236662	-0.705056	-0.187339
TR38266|c1_g1_i8	-0.286486	-0.668501	0.134041
TR38266|c1_g1_i3	-0.245433	-0.572579	0.210281
TR42847|c0_g4_i1	0.263318	-0.0537713	-0.971863
TR42847|c0_g4_i3	0.283774	-0.393342	-1.00335
TR42847|c0_g4_i2	-0.0447318	-0.46158	-0.656131
TR23447|c1_g1_i2	-0.307291	0.174029	-0.134179
TR41735|c1_g4_i2	0.000385201	-1.07517	-0.0181397
TR2214|c3_g9_i1	-1.19931	0.17897	-0.156365
TR35060|c0_g1_i2	0.696855	0.33787	0.233686
TR41805|c1_g4_i1	-2.10113	0.256555	-0.253097
TR8034|c5_g12_i3	-0.168282	-1.27563	-0.459801
TR8034|c5_g10_i1	0.524481	-0.686842	-0.521202
TR26112|c0_g1_i1	0.80748	-1.0555	-0.0791974
TR34281|c0_g2_i1	0.241264	0	-0.284163
TR36995|c0_g2_i2	0.4896	-2.43364	-0.625101
TR42642|c1_g3_i3	-0.0433353	-0.302184	-0.0120348
TR41020|c0_g1_i2	-0.987805	-0.160465	-0.184167
TR41020|c0_g1_i1	-0.00983101	-0.0255351	-0.199274
TR37131|c0_g3_i2	-1.45628	0.132317	0.623188
TR42642|c1_g8_i1	0.0867078	-0.338802	0.0541426
TR38411|c5_g7_i3	-1.85206	0.173599	-0.0596218
TR39380|c2_g2_i1	-1.71121	-1.80735	-0.917624
TR28969|c0_g1_i1	0.224831	-0.788081	-0.0501956
TR32211|c0_g3_i3	1.47876	-0.321928	-0.01024
TR40650|c0_g2_i6	-0.0962153	0.17585	-0.0472707
TR4018|c1_g5_i7	0.0695783	-0.646057	-0.0921576
TR37474|c1_g6_i3	-0.248218	0.0703893	0.13415
TR21949|c0_g1_i1	-1.49209	-0.405256	-0.644059
TR7520|c0_g1_i2	0.117165	-0.640458	-0.204728
TR21949|c0_g3_i1	-2.06604	0.111893	-0.532884
TR32504|c2_g5_i1	0.450945	-1.71049	0.122654
TR32504|c2_g3_i1	-1.19931	0.447459	-0.173279
TR39653|c0_g9_i1	0.0219445	0.0315356	0.0557678
TR33133|c0_g10_i2	-0.391954	0.378512	-0.258168
TR44720|c0_g1_i1	-0.351312	0.341037	0.244333
TR44720|c0_g4_i2	-0.755702	-1.64386	-0.332168
TR3924|c0_g4_i4	-1.12467	0	-0.256572
TR35479|c0_g12_i1	-0.840855	-0.452512	0.0451449
TR41088|c0_g9_i1	-1.04731	0.830075	0.417398
TR44612|c2_g2_i1	-0.0759264	-0.192645	0.163296
TR38880|c0_g1_i7	-0.482209	0.265772	0.453923
TR40046|c1_g5_i2	0.298191	-0.387023	-0.216347
TR7505|c0_g1_i2	-0.784271	-0.169925	0.353267
TR40046|c1_g11_i1	0.467267	0.192645	0.390261
TR20436|c0_g1_i1	1.08363	-2.09954	-1.03578
TR43971|c0_g3_i1	0.241767	-1.38042	-0.119362
TR43817|c0_g1_i4	-1.47942	-0.180572	-0.0237023
TR30248|c0_g3_i5	-0.858272	-0.206451	-0.319568
TR30248|c0_g3_i2	-1.03581	0.333424	0.0346142
TR33248|c1_g2_i3	0.0782252	-0.652077	-0.122653
TR39196|c0_g1_i4	-0.936274	0.900464	-0.0357751
TR40691|c0_g6_i5	0.139493	0.640458	-0.43874
TR40691|c0_g6_i3	0.210335	-0.744161	-0.194974
TR40691|c0_g6_i1	-0.286772	-0.5025	-0.360737
TR2768|c1_g2_i2	0.21167	-1.5529	0.591779
TR43370|c0_g5_i1	0.215729	0.662965	-0.351277
TR44558|c1_g7_i1	0.306331	-0.913585	-0.188627
TR26147|c0_g1_i2	-0.992858	0.343954	0.317517
TR40516|c0_g2_i1	1.44576	-1.19203	1.39304
TR41636|c0_g3_i2	-1.02713	-0.90182	-1.22801
TR19902|c0_g1_i1	1.1792	0.678072	0.0637606
TR40470|c0_g2_i1	0.321523	0.685891	-0.459801
TR33118|c0_g1_i3	0.321523	-0.201634	1.18405
TR33118|c0_g1_i6	1.41921	-1.40939	1.05525
TR7852|c2_g5_i2	-0.459769	0.285402	0.139049
TR43009|c2_g8_i3	-1.50864	0.155795	0.722724
TR41847|c0_g4_i1	-0.0148842	0.410933	0.0637606
TR41697|c0_g3_i1	1.00351	-0.0274807	0.444365
TR44652|c1_g3_i2	0.320948	-0.0981804	0.225224
TR2216|c1_g5_i1	-0.116847	-0.0874628	-0.0237023
TR37770|c0_g1_i3	-0.415686	-0.22418	0.0174815
TR44301|c1_g9_i1	0.523157	0.847997	1.13415
TR33814|c0_g4_i1	-0.775596	-0.515319	0.0444893
TR35082|c0_g1_i3	-0.403508	-0.369386	-0.26367
TR32745|c0_g2_i5	0.526516	-0.0759489	0.100286
TR8238|c0_g6_i1	-0.0259772	1.37615	-0.683473
TR30552|c0_g3_i1	0.808033	-0.61471	0.588602
TR37878|c0_g1_i2	-0.690785	-2.25701	0.452913
TR37878|c0_g1_i3	-1.8969	-0.793169	0.728225
TR38023|c0_g3_i1	0.151188	0.292782	-0.50328
TR41104|c2_g1_i1	-0.0868341	0.462972	1.04413
TR41104|c2_g3_i3	0.450359	0.138706	1.10293
TR41104|c2_g4_i1	-0.394325	0.790676	0.382368
TR41104|c1_g2_i3	0.977996	0.167457	0.861572
TR41104|c2_g3_i2	-0.987914	1.04367	0.454936
TR41841|c1_g2_i3	-2.65874	0.807355	0.0637606
TR40785|c1_g4_i2	0.241264	0	-0.220032
TR35621|c1_g3_i1	-0.80338	-1.24793	-0.277276
TR35621|c1_g4_i5	0.44966	-0.555389	-0.127665
TR35621|c1_g1_i1	-0.65874	-0.652077	-0.147744
TR35621|c1_g4_i6	0.837403	0.128008	-0.1786
TR21959|c0_g1_i1	1.0417	0	0.304769
TR34242|c0_g3_i1	0.0480012	-0.51625	-0.469363
TR30819|c1_g1_i1	1.08867	-0.25634	0.520139
TR3074|c0_g1_i1	-0.65874	0.932886	-0.122653
TR43997|c0_g1_i1	-0.40576	0.519374	-0.14269
TR2861|c2_g5_i2	-1.02713	-0.0412227	-0.358066
TR32262|c0_g2_i6	0.626662	-0.371969	-0.588316
TR43404|c0_g2_i1	-0.0618053	-0.0588937	0.485994
TR7830|c1_g7_i1	-0.412303	0.121991	-0.0851028
TR31831|c1_g3_i1	1.12714	-1.40084	-0.422674
TR19008|c0_g1_i1	-0.199309	-0.370643	-0.181352
TR34031|c2_g1_i5	0.0559482	0.403356	0.601417
TR26870|c0_g1_i3	0.11926	0.0494687	0.164973
TR26870|c0_g1_i1	0.0259354	-0.0160748	0.0597587
TR37231|c1_g2_i2	-3.49209	-0.660514	-0.0431546
TR39633|c3_g8_i1	0.0644047	-0.412323	0.361027
TR40536|c0_g2_i1	-0.556861	0.16601	0.406648
TR40536|c0_g2_i2	-0.426719	-0.777608	0.206719
TR40536|c0_g2_i4	-0.287365	-0.740133	-0.128884
TR41683|c2_g2_i4	0.28256	-1.39855	0.648723
TR29306|c1_g2_i7	0.455556	-1.74723	-0.905866
TR29306|c1_g1_i1	1.80069	-1.39855	-0.88733
TR3149|c0_g1_i2	-2.52124	0.192645	0.043002
TR36925|c0_g4_i3	-1.56177	-0.585354	1.38866
TR3149|c0_g1_i1	-1.25146	0.0626449	0.284933
TR44818|c3_g2_i1	0.315264	0.478047	-0.158632
TR20169|c0_g1_i1	0.140767	-0.603341	-0.217652
TR33627|c1_g5_i1	0.0112044	0.265937	0.0373691
TR23681|c0_g1_i1	-0.402842	-1.29373	-0.599204
TR42999|c0_g7_i1	0.623813	0.106915	-0.0517166
TR42999|c0_g7_i3	0.595662	-0.641546	0.13591
TR31834|c1_g1_i1	-2.44442	0.965784	0.203312
TR42279|c0_g6_i1	-1.91552	-0.131245	0.540199
TR24719|c1_g1_i1	-0.62673	-0.530515	-0.177248
TR39761|c1_g1_i1	-0.614346	-1.19265	0.0637606
TR38152|c0_g1_i2	-0.752562	0.430979	-0.106164
TR36981|c1_g1_i1	-0.822745	-1.44057	0.318333
TR34739|c0_g3_i1	-0.810034	-0.410788	-0.347027
TR33722|c1_g1_i1	-0.116053	-0.0288549	0.0494053
TR40863|c0_g1_i6	1.21573	0.415037	1.80073
TR40863|c0_g1_i8	-0.755702	-0.395929	1.30255
TR40483|c0_g1_i1	-0.462343	0.544321	0.648723
TR27906|c0_g3_i1	-0.729824	-0.452512	-0.244362
TR36467|c2_g5_i1	-0.277311	0.0740006	-0.184167
TR37723|c0_g4_i4	-1.85139	0.0641303	-0.266388
TR36274|c1_g1_i9	-0.513417	0.309328	0.184055
TR44651|c0_g1_i2	-0.127039	0.774035	0.59845
TR36845|c5_g4_i1	0.537657	0.289507	-0.521202
TR39761|c1_g5_i1	-0.498869	-1.67807	-0.351277
TR40750|c0_g1_i1	-0.632268	-0.847997	-0.369199
TR42543|c1_g1_i1	-1.05594	-0.311202	-0.957934
TR42543|c1_g1_i5	-0.877381	-0.327575	-0.936239
TR32662|c0_g3_i4	0.108813	0.695145	0.426331
TR42543|c1_g1_i6	0.784203	-1.65208	0.158918
TR31236|c7_g3_i1	0.864237	-3.74595	-0.616105
TR43821|c2_g8_i2	-1.33681	0.540568	-0.810709
TR21490|c1_g1_i1	-0.799701	-0.0951572	-0.205426
TR32280|c0_g2_i2	-2.44985	0.885829	0.0320517
TR39143|c1_g6_i5	-0.991264	0.367098	-0.341458
TR36637|c0_g2_i3	0.606811	-0.860142	0.525546
TR36637|c0_g1_i3	0.577566	-0.324129	0.689202
TR36637|c0_g1_i2	0.617515	-0.0987099	0.74111
TR40055|c1_g4_i1	-3.15867	0.543142	-0.78012
TR40055|c1_g2_i1	-2.16231	-0.0379679	-0.495667
TR34647|c1_g10_i2	-1.04403	-1.19265	-0.00335361
TR38994|c0_g1_i3	-0.629506	0.366475	0.113173
TR35827|c0_g2_i1	0.0619565	0.782902	0.9363
TR26898|c0_g1_i1	-0.109111	-0.199309	-1.19
TR39035|c0_g1_i3	2.70362	-0.0708835	0.912855
TR27695|c1_g1_i5	0.177927	0.706804	-0.34576
TR42535|c1_g2_i1	0.18402	-1.71621	0.184055
TR27919|c0_g1_i2	0.552012	-0.321928	-0.0617703
TR34994|c3_g1_i2	1.31016	-0.161463	-0.0418496
TR36148|c0_g5_i1	0.488747	-1.23133	-0.298809
TR2350|c0_g2_i1	-0.569492	-1.52546	-0.229971
TR23174|c0_g1_i1	-0.391954	0.807355	0.456078
TR25573|c1_g1_i4	1.45721	0.0715533	0.46652
TR23174|c0_g2_i1	-0.0358101	0.910733	0.374101
TR39952|c2_g3_i2	0.353232	-0.321928	0.741832
TR2943|c0_g1_i1	-0.0782934	-1.2134	0.125537
TR43910|c2_g8_i2	-1.67863	-0.735267	0.181197
TR39425|c0_g3_i6	-0.49739	-0.16273	-0.550348
TR28599|c0_g1_i1	-0.0388441	-0.628031	-0.323263
TR31408|c0_g2_i6	0.800691	0.137504	0.549187
TR37236|c0_g4_i5	-0.496291	0.0972972	-0.00495216
TR40284|c1_g5_i1	-0.277311	-0.341037	-0.184167
TR40284|c1_g4_i2	-0.915516	0.0563825	-0.174399
TR41596|c0_g2_i1	0.215729	-1	-0.199274
TR43145|c1_g8_i1	-0.273309	-1	0.442272
TR41683|c1_g1_i1	0.615659	-1.848	0.981298
TR7956|c2_g4_i3	0.418444	-0.398549	-0.302367
TR31197|c0_g1_i1	-1.07029	0.21403	-0.272603
TR30597|c1_g5_i1	0.309705	-1.70044	-0.0517166
TR30597|c1_g1_i1	0.0126103	-0.154034	-0.184738
TR25323|c0_g1_i1	-0.403667	-0.204358	-0.709964
TR8127|c1_g8_i1	0.531874	0.0565835	-0.0882425
TR37131|c0_g6_i1	-1.99178	0.0978473	0.644883
TR23135|c0_g1_i2	-0.768674	-0.569366	-0.459801
TR41663|c2_g8_i1	-1.81497	-1.3604	0.527328
TR30552|c0_g4_i1	0.276029	-1.58496	0.369174
TR25962|c0_g1_i1	0.15472	-0.245112	0.163897
TR43594|c1_g9_i1	0.230375	-0.942285	-0.141558
TR37932|c0_g5_i1	0.821753	0.4975	0.0206919
TR39872|c0_g4_i2	0.00530891	0.216492	0.447547
TR43347|c2_g1_i2	-0.423274	-0.570887	0.170507
TR37305|c0_g3_i1	0.382805	0.387023	0.154734
TR7852|c2_g7_i1	-1.48882	0.373458	0.248185
TR37910|c0_g2_i1	-0.513022	-0.52402	-0.586748
TR32274|c1_g5_i1	0.432265	-0.593601	0.00666018
TR32274|c1_g4_i1	-0.0556384	-0.0305344	0.0293636
TR32274|c0_g1_i1	0.33467	0.363405	0.00236004
TR32274|c1_g4_i2	-0.166887	0.0641303	0.0571879
TR39416|c2_g3_i1	-1.36923	0.959358	-0.646733
TR39416|c2_g2_i1	-0.532733	0.750641	-0.13216
TR28211|c0_g1_i2	-0.00136943	-0.210946	0.110724
TR19914|c0_g1_i1	-2.53115	0.228028	0.0538451
TR42371|c0_g1_i4	-0.29192	-0.463174	-0.0368434
TR42805|c1_g4_i2	-0.354727	-0.18303	-0.198047
TR42562|c0_g3_i3	-0.642915	-0.20482	-0.124849
TR38806|c1_g2_i1	-0.306224	0.36257	0.613958
TR37674|c0_g3_i1	0.495278	-1.85561	-0.0142419
TR35491|c1_g5_i1	1.58138	0.758992	2.05448
TR36144|c0_g1_i2	0.2756	-0.712718	0.111855
TR36144|c0_g1_i1	0.49961	-1.43494	0.240258
TR31236|c7_g2_i2	-0.973773	0.282481	-0.232697
TR32011|c0_g1_i3	-0.238837	-0.121991	-0.445253
TR41914|c0_g2_i1	-0.552946	-0.0641303	-0.137873
TR41805|c1_g5_i7	-0.477575	0.0785225	-0.0689748
TR36925|c0_g4_i2	-4.30365	-1.51937	1.34485
TR31140|c2_g5_i1	-0.199309	-0.137504	-0.225746
TR23832|c2_g1_i1	-0.652378	-6.74243	-0.952046
TR40960|c1_g3_i3	-0.92629	-2.12553	-0.476808
TR40960|c1_g2_i3	-1.47307	-0.317482	-0.242666
TR40960|c1_g2_i1	-2.22679	1.47175	0.16873
TR40960|c1_g2_i5	-2.99286	1.66588	-0.218827
TR37452|c0_g7_i2	2.06056	-0.925999	1.27526
TR37452|c0_g5_i1	-0.409729	0.605427	0.265394
TR38687|c2_g3_i1	-0.713882	-0.447459	-0.14269
TR32075|c1_g1_i1	0.637192	0.321928	1.18714
TR43329|c0_g3_i2	-0.32484	-0.263034	0.0637606
TR32235|c2_g1_i7	1.33674	-1.51457	-0.0882425
TR34746|c0_g2_i1	-1.19931	-0.206451	0.111066
TR33190|c0_g3_i2	0.637192	0.584963	-0.158632
TR33190|c0_g1_i1	-0.308933	1.43686	0.0281367
TR40870|c2_g9_i1	0.50696	1.9419	0.623188
TR7830|c0_g1_i1	0.404133	-0.511161	0.325466
TR30171|c0_g8_i1	-0.488815	0.669851	-0.0737429
TR38235|c0_g1_i7	-0.449852	-0.716207	-0.0447639
TR38235|c0_g1_i1	-0.623807	0.129768	0.0390335
TR38235|c0_g1_i2	-0.444852	-0.161442	0.0587714
TR51054|c0_g1_i1	-0.24281	-1.41028	0.199965
TR7870|c0_g1_i2	-0.454566	0.405256	0.211859
TR41735|c1_g2_i1	-0.228123	-1.12776	-0.209088
TR19108|c0_g1_i1	0.051753	-1.96467	0.167265
TR25803|c0_g1_i2	0.138561	-0.535719	-0.324805
TR30777|c0_g6_i1	-1.4217	-0.63743	-0.0806293
TR2571|c0_g1_i5	0.0579575	-0.462757	-0.0873571
TR43014|c2_g1_i1	1.29712	-1.63743	0.114387
TR42338|c0_g2_i8	0.381007	-2.49941	0.780169
TR40375|c1_g3_i2	0.870072	1.69834	-0.172307
TR41088|c0_g6_i1	0.190638	1.07276	0.697633
TR41088|c0_g2_i3	0.491264	-0.89439	0.0361042
TR38245|c0_g2_i2	0.02997	-0.15277	0.454434
TR37329|c0_g2_i4	-1.37619	0.408085	-0.507396
TR14949|c0_g1_i1	0.831065	-0.384664	0.290531
TR39049|c0_g8_i1	-0.989855	-1.60768	0.778006
TR39143|c1_g2_i2	-0.594679	0.471723	-0.362637
TR36537|c2_g2_i5	-0.279727	0.0595888	0.0374493
TR41043|c0_g9_i3	0.55742	-1.33442	-0.270658
TR33020|c0_g2_i1	-0.172342	-0.364516	0.0129725
TR39756|c1_g5_i1	1.20668	-0.367732	0.648723
TR7805|c1_g5_i3	0.117098	-0.681824	0.148303
TR39143|c1_g6_i7	1.13237	-3.26793	-0.215256
TR33237|c1_g3_i2	0.34126	-0.459432	0.127891
TR39143|c1_g6_i6	-0.08843	-0.089136	-0.320732
TR39143|c1_g6_i2	-0.40135	0.163935	-0.171955
TR2548|c0_g3_i2	-1.25178	-0.485427	-0.534141
TR16158|c0_g1_i1	-0.905578	0.133267	0.501882
TR7805|c1_g8_i1	-0.774076	-1.03801	0.159426
TR7805|c1_g3_i1	0.0718463	-0.517147	0.35607
TR43749|c0_g4_i2	-0.0933181	-0.82362	-0.67105
TR26211|c0_g1_i2	-2.05247	0.487266	-0.300651
TR38912|c2_g2_i1	-0.0293838	0.857981	-0.128884
TR38912|c2_g1_i4	0.440101	-1.70044	-0.351277
TR34503|c1_g2_i3	-0.860893	-1.01668	0.175406
TR33868|c1_g4_i2	-0.168935	0.0303736	-0.1689
TR26144|c0_g1_i1	0.803879	-1.22399	-0.46333
TR44418|c1_g6_i1	-1.19931	-0.63743	-0.284163
TR23374|c0_g1_i1	0.187714	0	0.0637606
TR43848|c1_g3_i1	-0.0923936	-0.144793	0.276829
TR33708|c0_g1_i3	-0.547232	0.63005	0.226032
TR12900|c0_g1_i1	-0.0737779	-1.1375	-0.325282
TR3696|c1_g1_i1	-0.230336	-0.671946	1.37954
TR53093|c0_g1_i1	0.663619	-0.209992	0.407367
TR37001|c0_g6_i2	-4.58301	0.915504	-0.0438193
TR37682|c0_g1_i3	0.333565	0.352302	0.209611
TR36944|c0_g1_i1	-1.10201	-0.296982	-0.362504
TR28049|c3_g1_i1	0.106794	-0.108934	-0.0171594
TR43404|c1_g3_i3	-1.28504	1.16993	0.611248
TR30514|c0_g2_i2	-0.369234	-0.263034	0.353267
TR38184|c0_g2_i1	0.105546	-0.180572	-1.0237
TR37194|c1_g1_i4	1.25589	-2.14684	-0.366874
TR38084|c1_g2_i1	0.346973	-1.72935	-0.328557
TR41735|c1_g4_i1	-0.0597129	-1.43968	-0.18718
TR41735|c1_g3_i1	0.0038761	-1.26742	0.137272
TR29658|c1_g1_i1	-0.433079	-0.0665512	-0.312388
TR8020|c0_g1_i6	-0.985814	0.030716	-0.340361
TR8020|c0_g1_i3	-1.1461	0.306391	-0.348589
TR40858|c0_g4_i2	0.608046	1.58496	0.648723
TR29835|c0_g1_i2	-0.67324	0.0616191	0.374101
TR29835|c0_g1_i1	-0.10747	-0.924138	0.476256
TR39820|c1_g3_i2	0.0230836	-1.16993	-1.29881
TR35957|c1_g10_i1	-0.901628	0.369234	0.193044
TR8302|c0_g1_i2	-0.916375	0.148392	-0.416865
TR43983|c2_g1_i2	-0.245112	-0.912537	-0.486206
TR34752|c0_g5_i1	-0.396909	-0.53952	-0.174103
TR34752|c0_g4_i1	-1.14778	-0.152003	0.0505852
TR37133|c0_g4_i4	0.351706	0.38109	0.129349
TR37133|c0_g2_i3	-1.50597	0.060121	-0.1689
TR27020|c0_g4_i1	0.138971	-0.217418	0.122355
TR34976|c0_g3_i1	0.614679	0.215729	0.319018
TR35827|c0_g1_i3	0.00160389	1.03279	0.670666
TR32468|c2_g1_i4	-1.75185	0.562936	0.0472725
TR3319|c0_g6_i1	0.897553	0.807355	0.251388
TR7831|c0_g3_i3	1.17776	0.733213	0.288827
TR7831|c0_g3_i1	-0.0270399	-0.197008	0.127993
TR39963|c2_g7_i3	-0.619097	-0.0849751	0.734344
TR25589|c0_g1_i1	-1.55514	0.307667	-0.208765
TR36234|c0_g3_i4	0.855139	-0.893085	0.478798
TR36234|c0_g3_i3	0.567957	-1.07866	-0.0849748
TR6931|c0_g1_i1	-1.32859	-0.0848889	-0.207541
TR43813|c2_g1_i2	-0.696808	0	-0.311749
TR3699|c1_g2_i4	0.547925	-0.347923	0.810995
TR7761|c1_g7_i2	-0.255892	0.621488	0.170676
TR7761|c1_g7_i4	-0.0158627	-0.609625	-0.16544
TR7761|c1_g9_i1	0.142797	-0.792195	-0.385547
TR35088|c0_g4_i1	-0.391954	0.247928	-0.331377
TR41143|c1_g1_i3	-1.65874	0.203533	-0.122653
TR3994|c0_g1_i8	0.215729	0.415037	-0.258168
TR3994|c0_g1_i2	0.501131	0.0995357	-0.458192
TR25805|c0_g1_i2	0.0544478	-1.37851	0.502872
TR37293|c0_g3_i1	0.838166	0.752072	0.137761
TR41112|c3_g2_i1	0.215729	0.236067	0.0954694
TR41851|c0_g1_i5	0.444547	0	0.0179569
TR43794|c0_g1_i3	-0.0155377	-0.542054	-0.628536
TR43794|c0_g1_i1	-0.0808963	-0.644958	-0.576611
TR38038|c0_g2_i3	0.478763	1.67807	0.549187
TR43700|c1_g9_i2	-1.11914	-0.485427	0.000566763
TR32141|c0_g4_i1	0.0637256	-0.0740006	-0.936239
TR36875|c1_g5_i3	-0.268022	-1.12858	-0.0526489
TR32100|c1_g3_i4	-1.13219	-0.347923	-0.684701
TR25805|c0_g1_i1	0.19662	-1.44057	0.275265
TR7360|c0_g1_i2	-0.269698	-0.0703893	0.602181
TR7360|c0_g1_i1	-0.199309	-0.0919225	0.678107
TR37411|c0_g2_i1	0.530729	-1.79874	0.265019
TR37411|c0_g4_i1	0.555343	-2.78215	0.475617
TR37411|c0_g7_i2	-0.434474	-0.436332	0.407715
TR37411|c0_g7_i3	-0.852838	-0.206167	0.439
TR39785|c0_g1_i4	-0.0997731	-1.48543	-0.573669
TR38235|c0_g1_i4	0.05223	0.673772	-0.374361
TR35661|c0_g1_i1	-0.649112	-0.163499	-0.189005
TR35661|c0_g2_i1	0.00714207	-1.47805	0.100286
TR35661|c0_g3_i4	-0.877381	0.0356239	-0.0982962
TR35661|c0_g6_i2	-0.03198	-1.09155	-0.202078
TR35661|c0_g3_i2	0.0687966	-1.19555	-0.0580805
TR35832|c1_g2_i1	0.731978	0.0331669	0.222458
TR35832|c1_g3_i4	0.373581	-0.439285	0.0727494
TR35832|c1_g3_i6	-1.3041	0.327431	-0.462676
TR35832|c1_g3_i2	-0.84931	0	-0.345233
TR35832|c1_g1_i1	0.148447	-0.68773	-0.113372
TR7402|c0_g1_i1	-0.555453	-0.142019	0.444582
TR2782|c0_g2_i1	-0.445469	-0.584963	0.0351914
TR42641|c0_g5_i1	-0.877381	0.857981	0.0637606
TR31813|c3_g6_i1	-0.462343	-1.32193	-0.0187016
TR32741|c1_g1_i6	-0.419699	-0.0120728	-0.296236
TR22792|c0_g1_i1	-2.92177	0.105353	-1.33678
TR40907|c0_g2_i1	0.0877893	0.142137	0.124846
TR40046|c1_g3_i1	0.0121953	-0.0780025	-0.724735
TR41674|c0_g4_i1	-0.0665536	-0.529549	-0.0166581
TR25849|c0_g1_i1	0.323688	-1.11494	0.0895237
TR29828|c1_g1_i1	0.579849	-0.901085	-0.0524925
TR2497|c0_g3_i1	0.913166	-3.45046	0.102235
TR2497|c0_g4_i1	-2.23364	0.343416	-0.648643
TR2497|c0_g3_i6	-0.103585	0.244518	-0.955399
TR36609|c3_g4_i1	-2.63671	1.10692	-1.25817
TR2497|c0_g3_i3	1.92125	-0.428334	-0.388519
TR36609|c2_g2_i3	1.31259	-1.94753	-0.784236
TR36008|c0_g3_i1	-0.440317	-0.70044	-0.466754
TR36008|c0_g1_i2	-0.56372	-0.949374	-0.6992
TR30932|c1_g1_i2	-1.14159	0.0857299	-0.141558
TR34760|c2_g4_i4	-1.06181	0.432959	0.326795
TR30848|c1_g3_i1	-0.0704111	-0.71172	-0.548423
TR29216|c0_g5_i1	-0.434042	-0.58724	-0.25703
TR43084|c0_g4_i1	-0.521237	1.1375	0.680432
TR43084|c0_g5_i4	-0.154915	1.26679	0.523192
TR43084|c0_g5_i2	-0.381512	0.287282	0.53867
TR43084|c0_g2_i1	0.104472	-0.573735	-0.0454685
TR38095|c0_g4_i3	-0.701809	1.03148	-0.0464223
TR25636|c0_g1_i10	-0.530515	-0.530515	-0.521202
TR43453|c2_g2_i5	-0.692349	0.211504	-0.540311
TR38063|c2_g4_i1	-0.00666373	-0.222392	0.956845
TR41932|c0_g1_i1	0.67516	-0.140178	-0.264862
TR35205|c0_g1_i5	-0.86916	-0.271302	-0.0211283
TR7780|c0_g6_i1	-0.547232	-0.222392	-0.284163
TR42323|c1_g4_i2	0.5831	0.641546	0.629358
TR24802|c0_g1_i3	-0.536344	-0.584963	0.0637606
TR33607|c0_g6_i1	-0.0997731	-0.347923	-0.573669
TR33607|c0_g3_i3	-1.02938	0.70044	-0.128884
TR33607|c0_g3_i2	0.704476	0.293731	0.319018
TR3891|c0_g2_i1	-0.604565	-0.91427	-0.341496
TR38778|c0_g1_i4	-0.586332	0.693897	0.185751
TR28659|c1_g1_i1	0.408374	-0.584963	-0.00662874
TR42964|c1_g4_i5	0.0230836	0.415037	-0.784236
TR41811|c1_g2_i1	-0.0618053	-0.556393	0.227259
TR8297|c2_g4_i3	-1.36437	-0.961526	-0.238802
TR41835|c0_g6_i3	-0.281771	0.415037	0.215764
TR41835|c0_g4_i4	-0.0962153	-0.667425	-0.0764171
TR21765|c0_g1_i1	-0.121306	-0.169925	-0.298809
TR32477|c0_g2_i1	-0.687808	-0.306661	-0.150978
TR44583|c1_g2_i3	0.454133	-0.830075	-0.567006
TR40440|c1_g6_i2	0.0328646	-0.27684	-0.00662874
TR24086|c0_g1_i1	0.187714	-0.115477	-0.0517166
TR29743|c0_g1_i3	0.122619	-0.695145	-0.323263
TR8038|c1_g2_i1	-0.33361	-1.03242	-0.218639
TR32920|c1_g1_i4	-0.276271	-0.681824	-0.345045
TR39912|c0_g2_i1	-0.199309	-1.32193	-0.351277
TR31951|c0_g3_i1	-1.15624	-0.584963	-0.225746
TR41656|c0_g4_i6	0.350888	-0.853159	-0.220032
TR37014|c0_g3_i1	0.0782252	0.0848889	-0.122653
TR40655|c0_g2_i4	0.122619	-0.678072	0.523192
TR41436|c1_g1_i3	-0.881133	-0.0868775	0.44083
TR43759|c0_g3_i2	-0.511253	-0.169925	-0.298809
TR43759|c0_g3_i1	-0.88838	0.10561	-0.0305668
TR37582|c0_g2_i2	0.550713	-0.758992	0.189291
TR33468|c0_g2_i3	-0.0737779	-0.928917	0.400188
TR33468|c0_g1_i1	-0.442627	-0.336428	0.355364
TR39229|c0_g3_i1	-0.67324	-1.18442	-0.879656
TR27175|c0_g1_i1	1.13629	0.607683	-0.158632
TR43027|c5_g1_i2	-1.1504	0.649814	0.20578
TR38073|c1_g2_i1	1.32223	-0.146841	0.467116
TR3076|c0_g1_i1	-0.754277	-0.828729	0.298226
TR40011|c0_g3_i2	-0.0680643	0.415037	0.0637606
TR38596|c0_g3_i1	0.163261	-0.329308	-0.17591
TR32028|c2_g2_i2	0.225189	0.0374747	-0.429279
TR42784|c0_g1_i5	-0.366766	0.167727	-0.371176
TR30998|c0_g4_i1	0.291326	-0.981853	-0.5121
TR15957|c0_g1_i1	0.658672	-0.415037	-0.0293488
TR40750|c0_g1_i4	-0.378279	0.115477	0.222959
TR11454|c0_g1_i1	-0.421701	0	0.800726
TR39756|c1_g6_i2	-0.0209716	-0.49304	0.0252864
TR38930|c0_g1_i3	-0.761551	1.12075	1.05611
TR38603|c1_g3_i8	-0.231018	0.148863	0.39818
TR32369|c0_g3_i1	1.28612	1.07039	1.20126
TR38345|c0_g3_i5	0.0351564	-0.387023	-1.21635
TR38345|c0_g5_i2	-0.82734	0.234465	-0.116812
TR30956|c0_g1_i2	-1.1062	-1	-0.383698
TR42858|c0_g11_i1	-0.00666373	0.440573	0.256406
TR44720|c2_g4_i2	-0.0707246	0.457207	0.300059
TR37092|c5_g1_i1	-0.374988	0.148323	0.67603
TR42812|c3_g9_i1	-2.18926	-1.1375	0.103562
TR36926|c1_g3_i2	0.114191	-0.131912	0.0354715
TR38907|c1_g2_i1	-0.421701	-0.114333	0.240286
TR40750|c0_g3_i3	0.853159	-1.05445	0.272347
TR34275|c0_g1_i2	-1.05079	-0.375039	0.041868
TR36875|c1_g6_i1	-0.0761935	-0.644082	0.163417
TR37052|c0_g2_i2	0.0230836	-0.514573	-0.319568
TR21923|c0_g2_i2	-0.883807	-0.36257	-0.383698
TR26139|c1_g1_i3	1.09514	-1.02748	0.125917
TR29725|c0_g1_i2	-0.476418	-0.260236	0.171676
TR29552|c0_g1_i1	1.32042	-1.20067	0.263095
TR23940|c0_g1_i1	1.80979	-2.33415	-0.152557
TR31870|c2_g3_i1	-0.199309	-0.169925	-0.405725
TR31870|c1_g1_i2	-0.662483	-0.20014	-0.234076
TR31870|c2_g1_i1	-0.0861804	0.229225	0.152505
TR27719|c0_g2_i2	0.570078	-0.415037	0.158918
TR17832|c0_g1_i1	0.180963	0.251539	0.478798
TR2951|c0_g1_i1	0.411556	-0.678072	-0.0847619
TR13553|c0_g2_i1	-0.675747	0	-0.0782584
TR38933|c0_g1_i7	-0.713882	-0.198546	-0.450813
TR23304|c0_g1_i1	0.685214	-0.641546	-0.829324
TR40362|c0_g2_i3	0.156835	-1.18442	-0.120664
TR35271|c1_g2_i4	4.20895	-1.04891	-2.14269
TR35271|c1_g2_i2	-1.06001	1.75971	-1.55317
TR29823|c5_g2_i2	-4.57048	1.38964	-0.30241
TR42641|c0_g15_i1	-0.161507	0.202189	0.320397
TR33344|c0_g1_i1	-0.0029116	-0.847997	-0.223521
TR33344|c0_g1_i2	-1.30199	-0.226068	0.0964268
TR41088|c0_g3_i1	0.323112	-0.196397	0.0372884
TR32228|c0_g1_i1	0.0164199	-0.31034	-0.983545
TR32228|c1_g1_i7	-0.110041	-1.16227	-0.320903
TR32228|c1_g1_i4	0.66114	0.278301	0.0379514
TR41088|c0_g7_i1	-1.4169	0.485427	-0.332168
TR10112|c0_g1_i1	-0.330553	-0.523562	-0.874839
TR41088|c0_g8_i5	-0.8238	1.37551	-0.287712
TR2250|c2_g2_i2	2.28289	-0.439285	0.562011
TR41805|c1_g3_i1	0.228928	0.321928	0.0952388
TR25093|c1_g3_i1	4.13844	-1.5639	1.26632
TR29273|c0_g1_i3	0.704831	-0.276285	0.72042
TR43404|c0_g3_i2	-0.447933	0.187763	0.256406
TR43404|c0_g3_i6	-0.0680643	-0.286118	0.215764
TR43404|c0_g3_i3	-0.110041	-0.339576	0.185633
TR30741|c0_g7_i2	-0.179131	-0.864345	-0.399486
TR44277|c4_g3_i3	-0.336812	0.540568	0.0637606
TR32829|c0_g2_i2	1.27614	-1.66297	0.561787
TR32829|c0_g7_i2	-0.396346	-0.554589	0.290531
TR37991|c0_g1_i5	1.1432	-1.97628	0.763587
TR32829|c0_g6_i1	-0.0882775	-0.736966	0.120344
TR37991|c0_g3_i1	0.157908	-0.514573	0.644136
TR32829|c0_g7_i5	1.11619	0.186219	0.692923
TR32829|c0_g2_i3	-0.395229	0.280108	0.435209
TR37991|c0_g1_i2	0.783225	-1.073	0.653922
TR36628|c1_g1_i2	0.488101	-1.45943	0.0637606
TR36628|c1_g1_i6	0.780371	-1.30189	0.0434406
TR7830|c1_g5_i1	-0.199309	0.025091	0.219555
TR38406|c3_g1_i1	0.240456	0.128406	0.134881
TR41663|c2_g14_i1	-0.844214	-0.671377	0.470386
TR44892|c1_g3_i5	-0.95564	0.748461	0.153259
TR44892|c1_g3_i2	-1.09106	0.652077	0.145702
TR2839|c1_g2_i1	-0.504163	0.0671142	-0.328557
TR2839|c1_g1_i1	-0.436348	0.277534	0.267294
TR41177|c0_g1_i1	-1.78427	0.584963	0.353267
TR41177|c0_g4_i2	-1.29552	-1.09622	0.218089
TR33064|c0_g2_i5	-0.633712	-0.0291463	-0.995133
TR8164|c0_g2_i4	-0.621707	-0.572626	0.498622
TR27627|c1_g1_i3	0.287352	-0.924273	0.287387
TR39746|c0_g1_i5	0.501131	-0.263034	0.566261
TR32745|c0_g2_i2	0.904483	-0.487827	0.0167593
TR33304|c0_g5_i1	-0.199309	0.321928	-0.521202
TR43378|c3_g2_i1	-0.317953	-0.0780025	0.339395
TR39540|c1_g1_i3	-0.571278	0.295456	0.189291
TR40485|c0_g1_i5	-0.349551	0.758992	0.0637606
TR42799|c1_g2_i1	-0.866733	-0.667425	-0.603664
TR7812|c2_g3_i1	-0.500311	-0.018859	0.46231
TR34715|c0_g1_i1	0.305076	-0.0881309	0.15687
TR42641|c0_g13_i1	0.148614	0.540568	0.996646
TR39443|c0_g3_i1	-0.199309	-0.847997	-0.0472707
TR39443|c0_g1_i1	-0.328164	-0.877516	0.405638
TR41164|c0_g7_i3	0.354435	-1.30875	-0.295033
TR41164|c0_g3_i1	-1.44724	-0.788496	0.137761
TR41164|c0_g6_i1	-1.75483	0.194503	0.0337034
TR41164|c0_g4_i3	-0.820507	-0.483168	0.196806
TR27146|c0_g1_i1	0.164848	0.028289	0.466245
TR38895|c0_g5_i1	-1.52124	0.341037	-1.25817
TR3685|c1_g1_i7	-0.336812	0	0.267294
TR32486|c2_g1_i1	-0.583224	0.177396	-0.169912
TR32116|c0_g1_i2	-0.095473	-0.365649	-0.792875
TR32116|c0_g1_i1	1.10608	-0.208753	-0.329024
TR39929|c0_g1_i1	0.336003	0.0630265	-0.13028
TR2973|c0_g2_i1	-0.0293838	0.643856	0.587323
TR29138|c1_g1_i1	-2.14417	0.114035	-0.493368
TR39604|c2_g1_i3	-2.04731	0.152003	-0.0617703
TR40985|c0_g1_i11	-0.132195	-0.0703893	0.0637606
TR29299|c0_g2_i1	-0.113579	0.908852	-0.124684
TR42669|c0_g2_i2	0.445596	-0.140713	0.115291
TR40145|c0_g1_i1	-0.199309	-0.736966	-0.772741
TR2261|c0_g4_i1	0.265654	0.435215	0.0839385
TR2261|c0_g1_i1	0.483956	-0.36059	-0.160946
TR33442|c0_g3_i1	-0.732183	-0.332575	-0.255518
TR40464|c2_g1_i1	-0.217845	-0.408911	-0.258168
TR2244|c1_g1_i8	-0.897928	-1.04439	-0.415849
TR43237|c3_g2_i1	0.707582	0.459432	1.06376
TR17067|c0_g1_i1	0.511185	-1.26679	0.239918
TR2750|c2_g1_i2	0.225189	0.90182	-0.540311
TR32959|c2_g5_i8	-0.45701	-0.880418	-0.226241
TR32959|c0_g1_i3	-0.560359	-0.413264	-0.263501
TR7623|c0_g2_i1	-0.199309	0.447459	0.304769
TR30202|c0_g5_i10	0.932603	-1.09516	-0.735941
TR7830|c1_g5_i3	-0.404129	0.420332	-0.141059
TR37723|c0_g8_i1	-1.63988	-0.247928	-0.0967041
TR35804|c0_g2_i6	0.818763	0.42711	0.676737
TR39822|c0_g3_i5	-0.65874	-0.211504	-0.810709
TR44002|c0_g4_i4	-0.482243	0.167727	-0.0386011
TR26187|c0_g2_i1	-0.891187	0.34915	-0.0247761
TR28154|c0_g1_i2	1.32832	-0.538866	0.762758
TR7718|c0_g2_i2	0.474921	-0.269187	-0.1689
TR41493|c0_g5_i2	-0.36158	-0.128324	0.0941342
TR43179|c2_g15_i1	-0.306224	-0.106915	-0.573669
TR31615|c0_g3_i1	0.172728	-2.11548	0.173458
TR43139|c1_g1_i1	0.0394781	-1.32193	-0.153831
TR39791|c0_g6_i1	-0.651821	0	-0.177248
TR32327|c0_g1_i2	0.704476	-0.0473057	0.357492
TR3304|c0_g3_i1	-0.970684	-0.289507	-0.436313
TR3304|c0_g7_i2	0.446794	-0.891747	0.136824
TR33329|c0_g2_i3	-1.01906	0.170534	-0.180743
TR29274|c3_g2_i2	0.256371	-1.42884	0.104403
TR36477|c0_g7_i1	0.323112	-0.974005	0.0637606
TR3909|c1_g3_i1	-2.00666	0.965235	-0.328557
TR42081|c1_g8_i2	-0.0543605	0.134301	-0.0207729
TR33606|c1_g5_i1	-0.490863	-1.24716	0.486452
TR40479|c0_g4_i2	0.324253	0.321928	0.0637606
TR38134|c1_g2_i1	0.704015	-0.754888	-0.369199
TR38134|c1_g4_i1	-0.0431896	0.598637	0.393909
TR38327|c0_g2_i1	-0.851386	-0.186413	0.0193665
TR42285|c0_g3_i1	-2.27731	-0.0255351	-0.118078
TR28119|c0_g1_i2	-0.0209716	0.337035	0.570721
TR43172|c0_g4_i1	-1.50597	-0.162271	-0.490828
TR33771|c1_g1_i2	-0.257024	-0.55141	0.0580918
TR8298|c1_g5_i1	-1.19931	-1.078	-0.660605
TR2351|c0_g1_i1	1.02308	0.807355	-0.199274
TR37669|c2_g2_i3	-0.232667	-0.0418202	0.312989
TR37669|c2_g2_i1	-0.375159	0.283582	-0.0027906
TR37669|c2_g1_i1	-0.358914	0.208399	-0.0476607
TR34767|c0_g1_i11	0.0435477	-0.352302	-0.0882425
TR34767|c0_g1_i6	0.125531	-0.254317	0.175871
TR44165|c1_g3_i2	0.14445	-1.49712	-0.205758
TR44165|c1_g3_i3	-4.02243	0.120294	-0.000369748
TR2214|c2_g1_i1	-0.541052	-0.370812	0.39384
TR48185|c0_g1_i1	-0.498869	-1	-0.2358
TR37452|c0_g1_i1	0.0600778	-0.0220263	-0.365924
TR3657|c1_g4_i1	-1.30622	0.146841	-0.0431546
TR37078|c0_g5_i1	-1.9542	-0.847997	-0.691127
TR37078|c0_g2_i7	0.726691	0.137504	0.326795
TR37078|c0_g1_i1	-0.125308	1.77444	0.0637606
TR34949|c1_g4_i6	-1.22239	-0.14439	0.246352
TR38023|c0_g7_i1	0.309705	-0.793549	-0.244362
TR42338|c0_g2_i2	-1.17068	0.108292	0.673149
TR43800|c2_g8_i2	-0.488815	0.540568	0.996646
TR26663|c0_g1_i3	0.863701	-0.222392	0.795564
TR8238|c0_g4_i1	0.286118	1.04064	0.182405
TR41663|c2_g4_i2	0.552617	-1.48074	0.305491
TR39820|c0_g1_i1	1.63563	-0.750022	-0.191496
TR33639|c1_g1_i4	0.0917002	-1.78887	0.249673
TR29826|c2_g2_i5	-0.199309	0.146927	0.118702
TR44163|c1_g1_i1	0.0934729	-0.234465	-0.0882425
TR35255|c2_g4_i1	-1.77534	-1.20163	0.272003
TR38920|c0_g1_i1	0.693776	0.716207	0.841368
TR29052|c0_g9_i3	0.385654	0.160465	0.185751
TR37219|c2_g2_i5	0.800691	1	1.20126
TR30365|c0_g1_i2	-0.858272	-1.58496	0.15687
TR4018|c1_g5_i2	1.2039	-0.195171	0.370297
TR35658|c0_g3_i2	0.800691	-1.45943	-0.426045
TR1215|c0_g1_i1	-0.332575	-0.387023	-0.379846
TR34770|c1_g3_i1	-0.729824	0.823122	0.170676
TR28750|c1_g1_i4	0.900333	-2.53352	-0.554923
TR30166|c0_g3_i3	-0.148306	0.125531	0.044506
TR42583|c0_g1_i2	0.179203	-0.514573	-0.213773
TR7369|c0_g1_i1	-0.81598	0.0207586	-0.372339
TR42583|c1_g4_i2	-2.2746	0.117357	-0.73142
TR28282|c1_g1_i3	0.800691	0.552541	0.711459
TR41820|c1_g10_i2	0.179203	0.722466	0.786227
TR38190|c0_g5_i1	0.998228	0.911066	0.853082
TR33221|c0_g1_i7	0.251353	-0.819428	-0.319568
TR2214|c3_g2_i1	-0.611435	0.233591	-0.112737
TR36191|c1_g6_i1	0.308295	-0.0896372	0.258577
TR7663|c0_g12_i1	-2.38999	0.616671	-0.48056
TR27166|c0_g1_i1	-0.614346	-0.862496	-0.351277
TR36451|c0_g2_i1	-0.32484	1.16993	-0.0617703
TR36992|c0_g1_i1	-0.689944	-0.0801703	-0.0724438
TR39935|c0_g4_i1	-0.0473057	-0.169925	-0.106164
TR3746|c2_g3_i2	-0.363696	-0.349942	-0.151252
TR31324|c0_g4_i2	0.209804	0.156726	0.220486
TR30441|c0_g1_i3	0.662919	-1.78606	0.191971
TR43468|c3_g1_i4	-1.19931	0.175087	-0.498118
TR2415|c4_g1_i1	-1.06604	1.58496	-0.431004
TR38354|c0_g4_i4	0.396542	-0.192645	-0.329582
TR36885|c0_g1_i1	0.44781	-0.335603	0.143195
TR34287|c2_g3_i6	-1.48471	0.714598	0.393068
TR8250|c2_g2_i3	-0.851386	-0.758992	-0.810709
TR8011|c0_g2_i1	-0.921775	-0.652077	-0.457072
TR34024|c0_g1_i4	-1.02097	0.227806	-0.351277
TR34024|c0_g1_i1	0.0289602	0.528928	-0.310635
TR3549|c0_g8_i1	1.53766	-0.206451	-1.25817
TR3549|c0_g8_i2	0.546935	1.13327	-1.4754
TR30466|c1_g1_i1	-2.00666	-0.14439	-1.5212
TR29558|c0_g1_i1	-0.22653	-0.298523	0.00879413
TR37327|c0_g3_i1	-0.199309	0	1.42633
TR37886|c2_g3_i2	-0.646055	0.504344	-0.0168579
TR34275|c0_g1_i6	0.0179422	-0.504077	0.3555
TR38760|c2_g1_i2	-0.800759	-1.65208	-0.53769
TR37377|c0_g2_i3	0.385332	-0.905807	-0.187182
TR37323|c2_g4_i12	-0.557763	-0.358454	-0.258168
TR38604|c0_g1_i1	-0.485613	-0.395929	-0.410171
TR31870|c2_g6_i1	0.102072	-0.400538	0.148649
TR34030|c1_g2_i2	-0.544867	0.0810147	0.0793014
TR32918|c0_g1_i2	0.0849942	0.056034	-0.102598
TR32918|c0_g1_i1	-0.580615	0.451796	-0.00291045
TR32921|c0_g3_i3	-0.544444	-0.510195	-0.205426
TR32921|c0_g3_i2	-1.52995	0.393145	-0.161532
TR32913|c1_g1_i3	0.0435477	-0.621488	-0.383698
TR35359|c1_g1_i4	-0.755702	0.641546	-0.332168
TR44193|c1_g7_i1	-0.199309	-0.432959	-0.106164
TR33160|c0_g3_i6	1.04531	-0.665581	-0.000369748
TR42326|c0_g1_i8	0.449526	0.789433	0.0185313
TR3733|c1_g3_i1	-0.595237	0.31034	-0.258168
TR2462|c0_g3_i2	-1.78427	0.249028	-0.137873
TR2462|c0_g1_i7	0.193606	-0.216133	-0.137873
TR34803|c0_g1_i2	0.573281	-1.08246	0.385689
TR36523|c0_g3_i1	0.324253	-1	0.523192
TR37222|c2_g1_i11	-0.14587	0.10497	-0.0791974
TR27254|c0_g1_i1	0.558121	-0.304855	-0.0806293
TR42213|c1_g2_i2	0.59424	0.900464	0.680432
TR43948|c2_g2_i1	0.670631	-0.157541	0.491182
TR28455|c0_g1_i1	-0.529014	0.734637	-0.393249
TR3765|c0_g1_i1	0.376883	-2.45943	0.0372884
TR3765|c0_g1_i2	-0.558637	-0.00569111	-0.217565
TR29587|c0_g1_i4	0.989725	-0.836501	-0.187778
TR35209|c0_g2_i1	-1.07378	-0.874469	-1.22575
TR42126|c0_g1_i5	0.13511	-1.06413	-0.874839
TR31627|c0_g3_i1	-1.13611	0.103836	-0.716926
TR1484|c0_g1_i1	-0.273309	-1.51457	0.326795
TR44557|c3_g2_i4	0.608046	0	0.385689
TR2644|c0_g1_i4	0.928447	0.625934	0.323823
TR38615|c0_g2_i1	0.691757	-0.08092	0.369864
TR40318|c0_g2_i1	-0.94777	-0.807355	-1.00663
TR40318|c0_g6_i1	0.274622	-0.469485	0.215764
TR2598|c0_g2_i1	-0.299836	-0.308122	-0.0975203
TR40454|c0_g3_i3	-0.146414	-0.20553	-0.0875775
TR40454|c0_g3_i2	0.149068	-0.310849	0.0119992
TR38104|c1_g1_i1	0.396794	-0.671377	-0.17268
TR39886|c1_g4_i7	0.667425	0.205319	0.113801
TR35325|c0_g4_i1	-0.40576	0.865699	0.186617
TR30363|c0_g3_i7	0.0594255	-0.597902	-0.0431546
TR7773|c0_g1_i1	-0.327633	0.328054	0.0941342
TR41025|c1_g6_i1	0.266355	-0.0703893	-0.743594
TR30918|c2_g3_i8	-0.199309	-1.11042	-0.148543
TR30918|c2_g3_i9	-0.116847	-1.38702	-0.199274
TR31798|c0_g3_i1	-0.108706	0.0652915	0.166854
TR14979|c0_g1_i2	0.333186	0	-0.656131
TR27118|c0_g1_i2	0.547572	-0.715023	0.128612
TR2189|c0_g1_i1	0.380445	-0.381634	0.160521
TR34869|c0_g3_i1	0.271152	-0.601451	1.46009
TR34869|c0_g1_i1	0.174364	-0.827269	1.37242
TR34869|c0_g3_i3	0.406951	-0.747977	1.37997
TR21406|c0_g1_i4	-1.09977	0.496426	0.0112932
TR21406|c0_g1_i3	-1.13219	0.666576	-0.13216
TR7683|c0_g1_i3	1.13604	0.235813	0.451577
TR39353|c0_g2_i1	-1.29863	0.00304366	0.56993
TR41250|c0_g2_i1	-0.766349	-0.621488	0.233686
TR34121|c0_g1_i1	0.900227	0.192645	0.0637606
TR34080|c2_g3_i1	0.00714207	0.668794	-0.106164
TR34242|c0_g1_i2	0.173109	-0.235628	-0.103696
TR30990|c1_g2_i1	-0.65874	-0.0534393	-0.859618
TR33625|c0_g5_i1	-1.14684	0.127756	-0.333575
TR33625|c0_g6_i2	-0.100176	-0.200427	-0.129747
TR28990|c0_g1_i1	-2.35565	0.92086	-0.258168
TR31166|c2_g1_i4	0.547035	-0.958777	-0.243864
TR41968|c0_g12_i2	-1.28677	0.436099	-0.43874
TR38406|c3_g2_i1	0.673312	-0.477322	0.389747
TR38242|c0_g2_i6	-0.665732	-0.960687	-0.296534
TR38242|c0_g2_i1	0.682047	-0.981141	-0.17294
TR30990|c1_g4_i1	-1.48882	-0.552541	-0.695231
TR30990|c0_g1_i2	-0.440317	0.233672	0.125822
TR25092|c0_g1_i1	-0.437821	-0.843881	-0.441032
TR3104|c0_g3_i1	1.65484	1	0.533246
TR22419|c0_g1_i1	-0.0388441	-1.28011	-0.853777
TR22817|c0_g2_i1	-1.13791	0.334419	0.125161
TR32950|c1_g1_i1	0.0774926	-1.02711	0.452936
TR32950|c1_g4_i4	-0.70294	-0.652077	0.616713
TR32950|c0_g1_i1	0.648688	-1.0049	0.366984
TR32950|c1_g4_i1	-0.35288	-0.8313	0.386129
TR32950|c1_g4_i3	1.02357	-1.27386	0.483845
TR40055|c1_g3_i1	-0.388787	0.127379	1.57277
TR40055|c1_g2_i3	-1.31607	-0.288142	-0.0901216
TR1787|c0_g1_i1	-0.896948	0.30841	0.0104624
TR24324|c0_g1_i1	-0.0242221	-1.49476	0.0164549
TR33125|c3_g1_i1	-0.739877	-0.584963	-0.391919
TR42354|c0_g1_i2	-1.09239	-0.893085	-0.636679
TR41103|c3_g12_i1	0.0230836	-1.26303	-0.351277
TR3915|c1_g1_i4	-0.69888	-1.08453	0.198062
TR40318|c0_g4_i5	0.254723	-0.167457	0.365789
TR38912|c2_g1_i2	-0.163685	-0.929611	-0.258168
TR39462|c3_g2_i1	-0.521237	0	0.549187
TR40909|c1_g3_i1	-0.877381	0.285402	-0.0782584
TR36063|c0_g3_i3	0.433909	-0.506185	-0.17591
TR33927|c0_g5_i1	0.35177	-0.763326	-0.0577572
TR34049|c1_g3_i2	0.485189	-0.415037	0.210602
TR21724|c0_g1_i2	-0.851386	0.788496	-0.00335361
TR35982|c0_g1_i1	0.00551098	0.117357	-0.570955
TR7927|c4_g4_i3	-0.758736	-1.48543	-1.28416
TR25502|c0_g3_i1	1.90627	-0.432959	0.478798
TR30653|c0_g1_i10	0.950438	-0.415037	0.108155
TR3089|c0_g1_i1	0.674818	-1.26443	-0.174413
TR30424|c0_g2_i1	1.4127	-1.1434	0.333081
TR42157|c0_g8_i1	-1.37516	-0.0238467	-0.91278
TR43322|c0_g5_i2	-0.582637	0.874469	0.549187
TR37822|c0_g2_i2	-0.521237	-0.152003	-0.258168
TR32934|c0_g1_i3	-0.369234	-0.537657	0.0954694
TR41055|c0_g1_i10	-0.0618053	0.263034	-0.673205
TR25017|c0_g1_i3	-0.400567	-0.175572	0.0861284
TR37078|c0_g2_i5	0.397932	-1.70044	0.118208
TR39421|c4_g2_i2	0.197581	0.341037	-0.0882425
TR17100|c0_g1_i1	-0.936274	-0.152003	0.0637606
TR22894|c0_g2_i1	-1.02938	-0.0931094	-0.614311
TR39746|c0_g2_i1	0.623813	0.621488	0.363321
TR39848|c0_g3_i1	-0.468305	0.014797	-0.0685467
TR37219|c1_g3_i2	-0.713882	0	-0.450813
TR37219|c1_g3_i1	-0.0321988	-0.341037	0.0122303
TR38800|c1_g1_i4	0.286118	0	-0.258168
TR2499|c0_g1_i3	-0.0111051	0	-0.312388
TR41328|c1_g2_i4	-1.02448	0.110703	0.198848
TR38162|c0_g1_i3	0.218479	-1.41871	-0.438281
TR33799|c0_g1_i1	0.735315	-1.01838	0.169371
TR23008|c0_g1_i1	-1.51813	-0.500429	-0.771853
TR32035|c0_g2_i2	-0.408062	-0.548063	1.2094
TR38354|c0_g4_i2	-0.508259	0.393145	-0.161532
TR36248|c0_g2_i1	-0.328592	0.296982	0.360742
TR38995|c0_g3_i1	-0.421701	-0.485427	0.426331
TR27628|c0_g3_i1	-0.135178	-0.874469	-0.308208
TR42860|c0_g2_i5	-0.0473057	-0.584963	-0.0187016
TR34041|c1_g6_i1	-0.199309	0.146841	0.613958
TR34041|c1_g3_i2	-0.523282	-0.128134	-0.114362
TR25123|c0_g1_i1	-1.47233	-0.103093	-0.986865
TR43412|c0_g5_i1	-0.234933	-0.357552	-0.266991
TR43412|c0_g6_i1	-0.55657	1.41038	-0.612451
TR42194|c0_g2_i1	0.428722	0.125531	0.189291
TR3529|c2_g1_i10	1.10735	-0.0780025	0.570721
TR3529|c2_g1_i12	0.514387	0.0565835	0.0637606
TR34468|c0_g1_i1	-0.351312	1.26303	0.648723
TR22995|c0_g1_i2	0.957033	-1.42084	0.0637606
TR37287|c0_g3_i1	-0.336812	-0.289507	0.411684
TR2604|c0_g1_i5	0.943649	-0.0614005	-0.273274
TR36947|c1_g1_i2	-0.958532	-0.263637	0.271014
TR20740|c0_g1_i2	0.0807991	-0.584963	0.478798
TR37001|c0_g6_i3	-0.293694	-0.412914	-0.430618
TR42680|c0_g1_i1	0.286118	0.95109	0.85731
TR35680|c2_g1_i2	0.438121	0.122857	-0.0357751
TR36752|c0_g1_i4	0.419601	-0.415037	-0.0431546
TR40529|c2_g2_i1	0.511185	-0.874469	-0.0737429
TR35871|c0_g1_i4	-0.432799	0.311944	-0.131255
TR40515|c0_g3_i2	0.348179	0.106915	0.407715
TR42937|c0_g2_i4	-0.784271	0.668794	-0.177248
TR43392|c0_g1_i3	-0.474943	-0.436099	-0.459801
TR20714|c0_g1_i4	-0.614346	-0.777608	-0.0617703
TR40096|c0_g5_i1	-0.0293838	0.5025	0.432994
TR36754|c1_g1_i6	-0.40576	-0.736966	-0.0357751
TR29895|c0_g3_i1	0.348179	-1.11548	-0.435045
TR28577|c1_g1_i2	-0.271099	-0.457682	-0.300812
TR34275|c0_g2_i1	0.0803904	-0.481264	0.518669
TR42009|c0_g3_i1	-0.49304	-0.0780025	-0.540311
TR35495|c2_g2_i4	-0.919201	-0.106915	1.11439
TR40948|c1_g1_i1	1.80069	0.932886	0.604329
TR34053|c0_g1_i1	-0.555453	-1.09311	-0.688312
TR34053|c0_g2_i1	-0.851386	0.0641303	-0.640784
TR32954|c0_g2_i4	0.266776	-0.490326	0.310401
TR39562|c2_g1_i1	-1.11685	-0.695145	-0.564271
TR2951|c0_g2_i1	-0.0737779	-0.584963	0.148649
TR29215|c0_g2_i1	-0.0122233	-0.26748	0.533246
TR26376|c0_g1_i3	-0.62673	-0.427421	-0.221642
TR29602|c0_g5_i2	-1.00666	-0.485427	0.426331
TR29602|c0_g2_i1	-0.236784	-1.19794	-0.363661
TR32867|c0_g1_i9	-0.23173	0.122857	-0.218639
TR7802|c0_g2_i1	-0.298844	-0.2824	0.478798
TR30014|c0_g3_i3	0.955019	-1.17284	-0.0449457
TR3270|c0_g4_i1	-0.351312	-0.321928	-0.258168
TR43815|c2_g1_i3	0.516898	0.192645	0.0637606
TR32778|c1_g1_i3	-1.59163	-0.485427	-1.15863
TR2346|c2_g3_i6	-2.92723	1	-0.04945
TR2346|c2_g3_i5	0.19662	-1.2123	-0.166245
TR33931|c0_g4_i1	0.733577	1	0.411684
TR42531|c0_g1_i6	-4.11817	-2.11151	-0.240393
TR42971|c0_g2_i3	-0.581778	0.75269	-0.0386011
TR32206|c0_g4_i1	0.589187	-0.652077	0.411684
TR33028|c1_g3_i1	-0.430634	0.0524674	0.215764
TR41968|c0_g2_i1	-1.13611	0.237692	-0.792875
TR37131|c0_g7_i1	0.506878	-0.907843	0.790795
TR41228|c1_g5_i2	-0.942817	-0.799218	-0.256536
TR7265|c0_g1_i1	0.0398789	0.129959	-0.327818
TR41043|c0_g13_i1	-0.899749	0.691878	0.533246
TR41043|c0_g9_i1	-0.199309	-0.491114	-0.20022
TR41091|c0_g4_i4	-0.595237	0.641546	-0.410171
TR6824|c0_g1_i1	-0.862274	0.0740006	0.20815
TR35989|c0_g2_i6	-0.116847	0.234465	0.783653
TR17271|c0_g1_i1	0.324253	-0.830075	0.273214
TR38172|c2_g3_i1	-0.199309	0.475338	0.0281367
TR33937|c4_g6_i10	-0.256227	-0.0773825	0.65522
TR34121|c0_g11_i1	0.501131	1.08746	0.523192
TR34121|c0_g5_i1	0.800691	0.662965	0.286153
TR34080|c2_g2_i4	0.855139	-0.530515	0.450784
TR43131|c1_g1_i4	-0.536344	0.890771	0.409535
TR25604|c0_g1_i1	0.061816	0.911463	-0.0308763
TR34080|c2_g2_i2	-1.4217	1.10825	-0.158632
TR3629|c2_g14_i1	-0.314786	-0.115477	0.363321
TR3629|c2_g14_i6	0.54304	-1.38391	-0.320154
TR43347|c2_g3_i1	-0.387381	-0.40439	0.0637606
TR37991|c0_g2_i1	-0.614346	0.0202724	0.73672
TR34090|c0_g3_i1	-0.718182	-0.356144	0.0637606
TR39649|c1_g4_i2	-1.02577	0.358345	0.840313
TR39154|c0_g2_i2	-0.281771	-1.05445	0.00931281
TR32504|c2_g2_i4	-0.784271	0.415037	-0.57565
TR32504|c2_g2_i2	-0.524303	-0.101506	-0.125825
TR43757|c2_g1_i1	-1.18537	-0.27711	0.247625
TR29740|c2_g1_i3	-1.35977	-0.160465	-0.418632
TR29740|c2_g1_i1	-0.816404	-0.346768	-0.274948
TR34923|c0_g10_i2	-0.676631	-0.0998986	-0.191169
TR22128|c0_g1_i3	-0.976916	-0.584963	0.0637606
TR25692|c0_g1_i1	-0.176039	-0.89812	-0.593352
TR30352|c0_g1_i2	-0.472327	-0.334419	-0.624295
TR8202|c0_g5_i1	-0.515336	-0.976541	-0.343415
TR2296|c0_g4_i3	0.13084	0.156119	0.29203
TR39154|c0_g8_i2	-1.12823	0.940499	0.162324
TR28348|c0_g1_i1	-0.260709	0.70044	-0.0617703
TR32470|c0_g1_i5	-0.134458	-1.63559	1.27903
TR32470|c0_g1_i1	-0.336219	-0.658026	1.45636
TR44413|c2_g1_i1	-1.71388	0.378512	-0.450813
TR44878|c3_g8_i1	0.459654	0.50696	0.400796
TR40446|c0_g2_i5	-0.614346	-0.452512	0.294058
TR6813|c0_g1_i1	-0.199309	1.48543	0.648723
TR40132|c0_g1_i13	-0.619417	0.059501	0.0174669
TR40132|c0_g1_i12	0.0388509	-0.530515	0.100286
TR37115|c0_g2_i1	-1.87738	-0.415037	-1.35128
TR37718|c1_g2_i4	-1.93627	-0.888969	0.0923297
TR2145|c0_g1_i1	0.85253	-0.0356239	0.16564
TR37628|c0_g1_i1	-1.27731	0.767023	-0.447201
TR29694|c0_g2_i1	-1.70181	0.160465	-0.853777
TR29694|c0_g3_i1	0.23679	0.556393	0.834279
TR44586|c2_g1_i1	-0.65874	0.72379	0.0417343
TR39143|c1_g2_i1	0.134749	-0.0607387	-0.148044
TR13380|c0_g1_i1	-0.243703	-0.489805	0.169114
TR39404|c0_g1_i7	1.24126	0.893085	0.256406
TR44246|c1_g4_i1	0.18402	0.283793	0.806985
TR41876|c1_g2_i3	-0.628152	-0.140598	-0.01024
TR41876|c1_g2_i2	0.291832	-1.49185	0.179238
TR30202|c0_g3_i1	0.270176	-0.378512	0.0637606
TR30121|c0_g1_i1	0.185355	-0.040642	-0.248183
TR30121|c1_g2_i2	-0.100342	-0.313417	0.122313
TR30121|c1_g2_i1	0.262911	-0.671946	0.0941342
TR2521|c0_g3_i3	0.646141	-0.633872	0.0864807
TR38519|c0_g4_i1	0.0719932	-0.103093	0.159976
TR28800|c0_g1_i1	0.472637	0.0242475	0.135314
TR32077|c0_g6_i12	-0.756257	0.0372329	-0.493188
TR40342|c0_g4_i1	-0.766349	-0.567041	-0.557728
TR37377|c0_g2_i4	0.740749	-1.72583	-0.431767
TR31584|c1_g3_i1	-0.107386	-0.058103	0.258777
TR31584|c1_g1_i2	-0.260709	0.0874628	-0.311749
TR44529|c2_g4_i1	-0.524336	0.110228	-0.33282
TR39094|c0_g2_i5	-0.199309	-0.350497	-0.286737
TR2773|c0_g3_i3	-0.199309	-1.152	0.414258
TR43249|c1_g2_i1	-1.1436	0.360043	-0.197004
TR43249|c1_g1_i1	-0.231913	0.108641	-0.162667
TR43249|c1_g7_i1	-0.417154	-0.505235	-0.336777
TR23446|c0_g1_i1	0.981263	-0.906891	-0.0357751
TR43249|c1_g3_i1	-0.550781	0.314109	-0.338338
TR43249|c1_g8_i1	0.152993	-2.96963	-0.583938
TR28903|c0_g5_i2	0.0416993	-0.137504	-0.695231
TR37092|c4_g2_i1	0.958232	0.823122	0.270211
TR17426|c0_g1_i1	-0.533728	-0.610053	-0.472292
TR43045|c1_g2_i1	0.478763	0.0931094	0.15687
TR31909|c2_g4_i1	-0.266997	-0.0657753	-0.0352794
TR44165|c0_g1_i1	0.473526	0.0614005	0.525092
TR44165|c0_g8_i2	0.260123	-0.245112	0.397661
TR24412|c1_g1_i1	0.800691	0.485427	0.0637606
TR24188|c0_g1_i1	-0.170162	-0.188445	0.256406
TR40781|c0_g5_i2	-0.437993	-0.713287	0.312227
TR31460|c0_g4_i1	0.958232	-0.530515	-0.314751
TR36660|c0_g1_i4	-0.706269	-0.231326	-0.405725
TR36660|c0_g1_i1	-0.0473057	-0.777608	-0.199274
TR39378|c0_g5_i1	0.260123	-0.367732	0.549187
TR35376|c0_g2_i1	0.325782	-0.109624	-0.164508
TR44216|c0_g2_i5	0.105546	0.160465	-0.116812
TR8183|c0_g2_i1	-0.713882	-0.234465	0.13415
TR8183|c0_g1_i2	0.209156	-2.08092	0.140382
TR36885|c0_g1_i4	0.559683	-0.427421	0.204623
TR6895|c0_g1_i1	-0.0388441	-1.28011	-1.11681
TR41400|c0_g1_i3	-0.135178	0.295456	-0.147744
TR34449|c1_g1_i2	-0.265398	0.33479	-0.0481323
TR42587|c2_g1_i2	-0.0737779	-0.226771	-0.0171594
TR38736|c1_g2_i13	-0.286772	0.4975	0.0637606
TR38736|c1_g2_i7	1.27713	0.520832	0.125161
TR43449|c1_g7_i1	0.5831	0.263034	0.120344
TR39143|c1_g2_i7	-0.00666373	-0.109182	-0.347077
TR32097|c0_g1_i6	0.305483	-0.817136	-0.101299
TR43211|c0_g1_i2	-1.44032	0	-0.936239
TR35198|c0_g1_i1	-0.552325	0.355095	-0.206
TR37249|c0_g2_i7	-0.968489	-1.9333	-0.835188
TR30139|c0_g8_i1	1.0417	1.39855	0.604329
TR44242|c2_g2_i1	-1.31479	-0.241008	-0.314751
TR44036|c0_g2_i1	-1.44724	-0.440573	-0.599204
TR38148|c0_g3_i2	-0.263439	0.430634	0.0320517
TR38148|c0_g4_i1	0.0961471	-0.758992	-1.07374
TR40464|c2_g8_i1	-0.569677	0.886789	0.71088
TR31813|c3_g10_i1	-0.164957	0.0512253	-0.0824602
TR40464|c2_g2_i1	0.216866	-0.280433	-0.267299
TR34234|c0_g3_i3	-0.138438	-0.0547195	-0.350806
TR23282|c0_g1_i1	0.438121	-0.36257	-0.199274
TR43851|c1_g7_i2	0.693776	-0.106915	-0.158632
TR40193|c1_g2_i1	0.0901978	-0.847997	0.215764
TR43007|c0_g4_i2	-0.951381	-0.29956	0.108155
TR43007|c0_g2_i2	-0.172342	0.0534393	0.00826548
TR26403|c0_g1_i7	-0.274597	0.307182	0.390571
TR26403|c0_g1_i4	-0.186925	-0.0506261	0.228147
TR26004|c0_g1_i1	-0.295524	-0.784271	-0.431004
TR44536|c1_g1_i1	-0.509649	0.0458037	-0.135548
TR44536|c1_g1_i2	0.251353	-0.697437	-0.11521
TR20732|c0_g1_i2	0.215729	-0.947533	0.215764
TR22928|c0_g1_i1	-0.462343	-0.777608	-0.936239
TR29252|c0_g2_i1	-1.01874	-0.514573	-1.03578
TR37289|c0_g4_i1	-0.936274	0.321928	-0.673205
TR39216|c2_g1_i2	0.47963	-0.746243	0.118208
TR35824|c1_g2_i1	-1.66228	0.619129	-0.405725
TR28876|c1_g1_i2	1.27462	-0.263034	-0.521202
TR37710|c0_g1_i3	-0.199309	0.70044	0.648723
TR3136|c0_g1_i2	0.0444201	-0.804408	0.162116
TR41055|c0_g1_i4	0.8198	-0.184425	0.15687
TR33190|c0_g2_i1	1.34258	0.79518	0.56126
TR21178|c0_g1_i1	-1.92041	0.397842	-0.497467
TR44208|c1_g1_i1	-0.443234	-1.16993	-0.473896
TR7743|c0_g1_i3	-0.82734	0.230664	-0.0621764
TR7743|c0_g1_i2	-1.39247	0.29492	-0.143942
TR34949|c1_g4_i5	-0.317145	-0.23502	-0.0643442
TR7830|c1_g5_i4	-0.475237	0.345729	0.304769
TR36892|c0_g2_i3	0.761248	-1.85683	0.468265
TR36892|c0_g2_i2	0.324516	-1.07382	0.496845
TR38375|c0_g2_i1	-0.199309	-1.22239	-0.573669
TR33667|c0_g1_i1	0.300537	0.385431	0.225648
TR30432|c0_g1_i3	0.0881309	0.420706	0.214627
TR43749|c1_g5_i2	0.423722	-0.189342	0.116779
TR2361|c2_g1_i2	-0.0650607	-2.93701	1.55046
TR2361|c2_g1_i1	-0.114634	-2.68557	1.51979
TR41683|c2_g4_i3	0.00390551	-0.87245	0.338868
TR41683|c2_g4_i2	-0.400516	-0.70044	0.397591
TR43404|c1_g2_i2	-0.836739	-0.182864	0.371883
TR43404|c1_g1_i1	-0.100905	0.388271	0.150225
TR40377|c3_g1_i2	-0.555453	-1.09311	-0.766314
TR27122|c0_g2_i4	-0.651821	-3.11548	0.170676
TR37979|c0_g1_i1	-0.199309	-0.0124909	-0.286426
TR29414|c0_g2_i3	-0.479417	-1.08746	-0.564271
TR15497|c0_g1_i1	-0.421701	0.652077	0.0637606
TR40765|c0_g2_i4	0.468116	0.0824622	0.368615
TR41939|c0_g3_i2	-1.68474	0.652077	-0.573669
TR40765|c0_g2_i3	-0.0293838	2.56478	-0.614311
TR43613|c1_g3_i1	1.19924	-1.1375	0.359216
TR41076|c1_g4_i2	0.215729	0.917538	-0.106164
TR41076|c1_g4_i1	0.270176	0.758992	-0.466754
TR38430|c1_g3_i2	0.407027	-0.451379	-0.358472
TR27528|c0_g1_i1	0.358173	-0.113211	0.778784
TR2221|c0_g1_i2	0.276329	0.0909737	0.444241
TR39623|c0_g6_i2	-1.84567	0.63743	-0.0837966
TR37452|c0_g8_i1	0.492569	0.269187	0.393068
TR37452|c0_g2_i1	0.926222	0.788496	0.648723
TR37452|c0_g1_i4	1.32985	-0.298658	0.461096
TR44100|c1_g6_i1	-1.32706	0.267104	-0.0375227
TR36327|c0_g1_i5	0.185197	-0.644183	0.32009
TR40162|c2_g4_i2	0.725403	-0.0246621	0.0307833
TR30452|c0_g2_i1	-0.610735	0.14439	0.0419012
TR2216|c1_g2_i1	0.336744	0.350497	0.599813
TR44152|c0_g1_i1	-0.199309	0.150025	-0.0175395
TR39459|c0_g4_i2	-0.502378	-0.321928	-0.184167
TR39459|c0_g4_i1	-0.236021	-0.5281	-0.0182752
TR41819|c3_g4_i2	-1.62557	-0.045443	-0.179282
TR41819|c3_g4_i3	-1.0191	-0.388453	0.281723
TR41104|c2_g3_i1	-1.33396	1.07198	0.255215
TR32934|c0_g3_i3	-0.210364	0.0433926	-0.162307
TR24523|c0_g1_i1	-0.258202	0.400538	-0.673205
TR35448|c0_g1_i5	-0.720141	-0.0220263	-0.280194
TR31509|c2_g2_i1	-0.00162814	0.432586	0.678676
TR37131|c0_g3_i1	0.269854	-0.338717	0.936381
TR44246|c1_g4_i2	0.488747	0.0780025	0.648723
TR30788|c3_g1_i1	0.493713	-0.352302	-0.14269
TR37873|c1_g3_i1	0.286118	0.415037	-0.84313
TR38707|c0_g1_i1	1.46366	-0.777608	0.800726
TR37812|c0_g2_i14	-0.521237	-0.923379	-0.325282
TR41402|c1_g4_i3	0.385654	0.887525	-0.557728
TR2214|c1_g1_i1	-0.00666373	-0.959358	-0.310635
TR20014|c0_g1_i2	0.590473	-0.210218	0.0880081
TR15038|c0_g1_i1	0.35055	-0.438345	-0.417511
TR24180|c2_g1_i1	-0.814968	0.463567	0.424642
TR35316|c0_g1_i3	-1.45711	-0.289507	-0.432197
TR35316|c0_g1_i6	-0.711644	-0.314109	-0.529064
TR34916|c0_g3_i2	-0.879319	-0.230484	-0.570445
TR31323|c0_g4_i1	0.432959	-0.621488	-0.0882425
TR35152|c0_g1_i2	-0.18537	-0.516576	-0.00803009
TR35152|c0_g1_i3	0.962542	-0.315355	0.102755
TR35152|c0_g1_i1	0.567328	-0.437064	0.206365
TR41456|c1_g1_i1	-0.288118	-0.0216951	-0.417366
TR24902|c0_g1_i1	-0.365667	-0.318361	-0.039862
TR41456|c2_g2_i5	-0.449675	0.2824	0.452654
TR44143|c1_g1_i10	-0.199309	0.125531	-0.0737429
TR37594|c0_g5_i1	0.463656	0.568843	0.404798
TR36241|c0_g2_i1	-0.540346	0.0374747	0.543754
TR41962|c1_g1_i1	1.70251	-1.24793	0.339395
TR18620|c0_g1_i1	-2.2437	-0.289507	-0.980634
TR37092|c5_g3_i1	1.50299	-0.932447	0.36984
TR38631|c1_g1_i7	-0.614346	0.415037	-0.713847
TR36180|c0_g3_i4	0.0799148	-0.0771679	0.473152
TR41805|c1_g5_i1	0.0985961	-0.0539388	-0.0132618
TR44165|c1_g12_i2	0.839791	-2.70044	-0.513297
TR38766|c0_g3_i1	-0.843165	0.263034	0.326795
TR38766|c0_g7_i3	-0.893206	-0.196397	-0.17844
TR38766|c0_g6_i3	0.108813	0.131245	-0.0431546
TR38766|c0_g6_i1	0.189256	-0.974005	0.127891
TR31312|c0_g1_i2	-0.724529	0.220876	-0.0521587
TR19890|c0_g1_i4	0.260123	-0.192645	0.921742
TR29508|c1_g1_i3	-0.0607889	-0.324727	0.328658
TR44175|c4_g2_i2	-0.269698	1.06711	0.715837
TR24538|c0_g1_i2	-1.43635	0.447459	0.0193665
TR25701|c4_g3_i1	-0.862274	-0.440573	-0.862239
TR42942|c2_g1_i1	-0.516282	0.303278	0.172093
TR43749|c0_g3_i1	-0.125308	-1.51096	-0.961775
TR31749|c0_g1_i1	0.909427	-0.121562	0.248185
TR2383|c0_g3_i1	-0.455038	-3.62205	-0.178913
TR2383|c0_g5_i1	-0.636229	-1.39348	0.0116379
TR38074|c1_g12_i1	-0.383733	0.278976	0.238664
TR38074|c1_g9_i1	-0.296333	0.324272	-0.0973942
TR3507|c2_g2_i3	-0.25686	0.527411	-0.260184
TR25514|c0_g2_i1	0.13511	-0.201634	0.447089
TR30166|c0_g6_i1	0.143083	-0.347923	0.233686
TR30186|c1_g1_i2	0.0544478	-0.378512	-0.244362
TR7817|c1_g2_i1	-0.0417675	0.509014	-0.636679
TR7817|c1_g1_i2	-1.98358	0	-0.623649
TR42922|c0_g2_i1	0.205948	0.260867	0.356808
TR39520|c1_g6_i1	1.41352	-1.2878	-0.214704
TR43224|c1_g5_i2	-0.334661	0.0213737	-0.131964
TR18414|c0_g1_i1	-0.0806643	0.847997	0.741832
TR38444|c0_g2_i1	0.215729	-0.415037	-0.199274
TR43167|c0_g11_i1	-2.62673	0.515498	0.378271
TR35024|c0_g8_i5	0.661485	-2.17333	0.324525
TR32011|c0_g1_i5	-0.110041	0.263034	-0.0578689
TR38880|c0_g1_i2	-0.655229	0.350332	0.501815
TR8871|c0_g4_i1	-0.862274	-0.925999	-0.599204
TR38190|c0_g5_i4	0.566226	0.476814	0.632603
TR30373|c2_g4_i6	-0.561879	0.295739	0.0713738
TR43239|c2_g1_i1	-1.15749	0.79518	-0.190812
TR3056|c0_g2_i2	0.299354	-1.36923	-0.0424388
TR33240|c0_g1_i2	-0.463507	-0.233097	0.568996
TR30956|c1_g1_i1	-1.55686	0.851901	-1.48644
TR39579|c3_g1_i3	-0.246615	-0.146841	-0.00779267
TR2745|c0_g1_i1	-0.0838316	-0.0995357	0.15687
TR42197|c0_g1_i4	0.275293	-0.286713	0.0212001
TR42197|c0_g1_i2	0.110186	-0.0558219	-0.0475564
TR42197|c0_g1_i1	0.0895443	0.076962	0.0383859
TR14770|c0_g1_i1	-0.784271	-1.2303	-0.223121
TR7319|c0_g2_i1	-0.121849	-1.18156	-0.0320994
TR28695|c0_g1_i4	-1.12675	-0.85937	0.081422
TR39066|c0_g1_i7	0.432959	0.263034	-0.936239
TR39066|c0_g1_i1	-0.128919	-0.489038	-1.30397
TR39066|c0_g1_i6	0.2385	-0.423808	-1.19404
TR29957|c0_g3_i2	-2.32584	-0.163058	-0.560271
TR3925|c0_g8_i1	0.165264	-2.32193	-0.425277
TR38134|c1_g3_i2	-0.0599058	-0.154328	-0.0223961
TR2514|c1_g10_i4	-1.39725	-0.10218	-0.330871
TR35481|c1_g5_i1	-0.453065	-0.632268	-0.366874
TR33348|c0_g1_i2	0.187714	-0.0681715	0.381243
TR2782|c0_g5_i1	-0.180693	-1.1375	-0.296135
TR3230|c0_g1_i1	-0.65874	-0.796467	-0.0737429
TR26675|c0_g1_i1	-2.04731	0.0395284	-0.298809
TR39673|c0_g1_i1	0.05223	-0.133583	0.102493
TR32188|c3_g1_i7	-1.14273	0.910733	-0.995133
TR32188|c3_g1_i5	-0.739877	1.39232	-0.0293488
TR32188|c3_g1_i13	1.03375	0.0186157	0.565158
TR32188|c3_g1_i8	0.837571	-0.33812	0.492898
TR38219|c1_g2_i1	-0.623449	-0.158065	-0.733423
TR40284|c1_g3_i1	-0.906527	0.336283	-0.280888
TR39649|c1_g1_i6	-1.03997	0.32987	0.670007
TR43586|c0_g1_i3	-1.49887	-0.192645	-0.128884
TR8124|c1_g1_i5	0.0230836	0	0.122654
TR30253|c0_g2_i1	0.822887	-0.503433	0.192085
TR37992|c0_g1_i2	0.822386	-0.0901978	0.411684
TR44239|c2_g1_i1	-2.52124	-1.44746	-0.521202
TR42723|c2_g1_i5	-1.15624	0	-0.173279
TR38288|c3_g5_i5	-0.221562	0.356834	0.249951
TR40748|c0_g2_i2	0.274622	-1.848	0.648723
TR3342|c3_g1_i1	-0.364368	-0.509014	-0.287712
TR42811|c0_g1_i1	-0.416338	-0.588998	-0.501192
TR34462|c1_g7_i5	-0.236784	-0.115477	-0.0923586
TR40550|c0_g1_i4	0.234787	-0.111645	0.0941342
TR34275|c0_g1_i1	-2.87738	0.0223678	-0.0658747
TR26813|c1_g3_i1	-0.556861	0.822357	0.00998933
TR2731|c0_g6_i1	-1.08066	0.0801703	-0.639258
TR15895|c0_g1_i1	1.47876	0.263034	0.326795
TR36889|c1_g5_i4	-0.784271	1	0.566261
TR37987|c0_g1_i10	-0.816589	-0.259387	-0.498553
TR26891|c0_g2_i1	-0.263439	-0.275634	-0.211874
TR44298|c1_g3_i2	0.847997	-0.206451	0.549187
TR44298|c1_g3_i5	0.526768	-0.425926	0.284603
TR37119|c0_g1_i1	-1.1062	-0.658963	-0.595202
TR40542|c1_g1_i1	0.375084	-0.0646091	0.340768
TR32898|c1_g1_i2	-0.435243	-0.0938418	-0.0258254
TR32871|c0_g1_i1	0.754888	2.22882	0.7642
TR40440|c1_g4_i3	0.345012	-0.678072	-0.351277
TR23862|c0_g2_i1	-0.532208	0.0345572	-0.0171594
TR38785|c0_g4_i2	1.27018	0.157541	0.407715
TR3500|c0_g3_i10	-0.843725	-0.281068	-0.409175
TR36477|c0_g11_i1	-0.411093	0.0419723	0.0584271
TR3421|c1_g6_i1	0.34235	-0.774287	0.18638
TR3421|c1_g6_i2	-0.0686794	-0.314873	0.253456
TR26645|c0_g1_i3	-0.922301	0.228397	-0.226917
TR37695|c0_g2_i1	0.550713	-0.137504	0.189291
TR3686|c1_g1_i2	-0.0913935	-1.29418	0.464723
TR3686|c1_g1_i6	-0.00170885	-0.861294	0.465501
TR22051|c0_g1_i1	-2.09239	0.584963	0.0637606
TR19734|c0_g1_i1	-0.818219	0.4441	-0.0894857
TR34764|c0_g1_i2	-0.755702	0.31034	0.0637606
TR2514|c1_g10_i1	0.246491	-1.61005	-0.150364
TR19302|c0_g1_i1	-0.784271	-0.584963	0.0637606
TR35817|c1_g1_i1	-1.06181	-1.51457	-0.557728
TR15606|c0_g1_i1	0.553823	-0.0631784	0.546107
TR41811|c1_g6_i1	-0.0259772	-0.425306	0.0941342
TR28616|c0_g1_i4	-0.788933	-0.116253	0.911757
TR38208|c0_g2_i2	0.164067	-0.0897302	0.487832
TR38904|c0_g1_i2	-0.280229	0	-0.0171594
TR40308|c1_g2_i1	0.163261	0.0995357	0.504333
TR37991|c0_g1_i3	0.75935	-2.1822	0.429045
TR37991|c0_g1_i4	-1.88113	-0.018859	0.411684
TR19122|c0_g1_i1	0.286118	-0.234465	-0.01024
TR33639|c1_g1_i1	-0.330294	-0.363348	-0.478293
TR33639|c1_g1_i5	-0.616466	0.0438162	-0.270935
TR33639|c1_g1_i3	-1.23202	-0.0195402	-0.0506388
TR28039|c0_g1_i1	1.05223	0.308122	0.478798
TR41605|c0_g1_i5	-0.953656	-0.1453	0.287387
TR42999|c0_g4_i2	0.40768	-0.812914	0.250846
TR34271|c2_g5_i6	1.09615	0.313158	-0.521202
TR38252|c0_g2_i1	0.693776	0.280108	0.715837
TR40877|c0_g4_i6	-0.199309	-0.754888	-0.521202
TR40877|c0_g4_i5	0.0844842	-0.523562	-0.289876
TR32844|c0_g1_i3	-0.889241	-0.351763	-0.194221
TR36171|c0_g1_i1	0.767524	-0.289507	0.0637606
TR30614|c0_g1_i2	0.343834	-0.374396	0.182405
TR30614|c0_g1_i1	0.150025	-0.0813001	0.177717
TR44104|c1_g2_i1	0.0473312	-0.101283	0.0637606
TR44246|c1_g5_i1	0.352739	-2.10109	0.770029
TR2824|c0_g6_i2	-1.21338	-1.26024	-0.00803009
TR7761|c1_g1_i1	-0.211693	-0.285402	-0.106164
TR37092|c2_g1_i1	-0.294466	-0.306661	0.486452
TR32517|c1_g5_i2	-0.845672	0.399931	0.00236004
TR32517|c1_g4_i3	-1.72982	-0.530515	-0.549216
TR3080|c1_g2_i9	-0.576783	-0.0474787	-0.154314
TR41470|c1_g2_i2	0.0202576	-0.212545	-0.804136
TR41104|c2_g2_i1	-0.451696	0.830075	0.438156
TR41104|c2_g5_i1	-0.0331165	-1.10434	0.14529
TR35393|c0_g2_i2	0.470543	-0.0671142	0.889731
TR31813|c3_g3_i3	0.690508	-1.18057	-0.0464223
TR34090|c0_g4_i6	-1.28961	-0.413957	0.0958218
TR7402|c0_g2_i1	-0.17074	-0.217591	0.943466
TR28616|c0_g2_i1	-0.877381	-0.192645	0.871116
TR41805|c0_g1_i1	0.286118	0.263034	0.201264
TR3473|c0_g2_i1	-0.316666	-0.356144	-0.00550207
TR29826|c2_g2_i3	-0.599239	-0.321928	0.0484938
TR29826|c2_g2_i2	0.169925	1.16993	0.668623
TR30741|c0_g8_i2	1.55419	-1.63743	-0.764234
TR30741|c0_g8_i1	1.9473	-2.08627	-0.708729
TR37848|c0_g2_i1	0.24483	-1.18813	-0.322915
TR42737|c0_g2_i1	-1.02358	-0.0455626	0.0487324
TR35353|c0_g1_i1	0.0195862	0.10225	0.904494
TR42285|c0_g5_i5	-0.603031	-0.207325	-0.104745
TR40563|c2_g4_i1	-0.137908	-0.436099	0.295086
TR40563|c2_g3_i1	-0.547232	0.920566	1.13905
TR40563|c2_g6_i4	0.254409	-1.29474	0.715124
TR40563|c2_g6_i2	-1.01575	0.440191	0.36965
TR39137|c0_g2_i1	-0.428791	-0.765535	-0.323263
TR39137|c0_g5_i2	-0.696808	0.415037	0.233686
TR39137|c0_g1_i1	-0.151612	-0.324962	-0.231144
TR39137|c0_g5_i1	0.250139	0.0295443	0.00279257
TR37370|c0_g4_i4	0.199241	-0.249978	0.411684
TR37370|c0_g4_i1	0.905487	-0.189825	0.248975
TR33344|c0_g3_i4	0.823775	-0.866733	0.319018
TR32822|c0_g3_i3	-0.526671	0.053242	-0.197106
TR37163|c0_g1_i9	-0.0997123	-1.74398	-0.273995
TR14146|c0_g1_i1	-0.343699	-0.691878	-0.869125
TR40055|c1_g2_i4	-2.52124	-0.0848889	-0.54196
TR36434|c1_g7_i1	0.623813	-0.530515	0.270211
TR36434|c0_g1_i1	0.0901978	-0.710493	-0.646733
TR36434|c1_g10_i1	-0.174218	0.576501	0.380618
TR36434|c1_g5_i1	-0.199309	0.120294	0.0637606
TR40393|c2_g5_i3	-0.514811	0.731804	-0.128884
TR40393|c2_g6_i2	-0.521237	0.485427	-0.0882425
TR40393|c2_g5_i2	-0.232476	0.529253	-0.147744
TR21169|c0_g3_i1	0.718229	-0.169925	0.215764
TR33115|c0_g1_i2	-0.182077	-0.286727	0.0866913
TR38378|c0_g1_i1	-0.0737779	0.540568	0.871116
TR38378|c0_g2_i1	-0.719566	0.294825	0.782842
TR43021|c1_g2_i2	0.658672	-0.192645	-0.128884
TR43021|c1_g1_i2	0.274622	0.289507	0.508545
TR43021|c1_g1_i1	0.523157	0.0703893	0.469753
TR43021|c1_g2_i5	0.550713	0.471306	0.332249
TR20497|c0_g1_i1	-1.02577	-0.209792	-0.291082
TR40715|c0_g3_i1	-0.973749	0.387023	-0.286182
TR30240|c3_g1_i1	-0.67482	0.229482	-0.462024
TR3657|c1_g3_i3	-0.521237	0.263034	-0.170705
TR3657|c1_g3_i2	-0.0293838	0.321928	0.151223
TR2521|c0_g3_i2	0.253459	-0.476149	-0.00430369
TR42168|c0_g3_i1	-0.648294	-0.31774	-0.192579
TR33735|c2_g2_i1	-0.469398	1.05184	0.855956
TR33735|c1_g1_i2	-1.08383	-0.555215	0.0836601
TR33735|c2_g2_i9	-0.137908	0.0124909	0.61915
TR33735|c2_g2_i3	-0.285039	0.194378	0.960753
TR33735|c2_g2_i2	-0.00920592	-0.966525	0.329051
TR33735|c2_g2_i5	-1.15007	1.5883	0.853838
TR37163|c0_g1_i3	0.22717	-0.972693	0.0359264
TR37092|c3_g2_i2	0.531505	-2.38466	-0.790389
TR29828|c3_g4_i3	-3.2582	0.604071	-0.471571
TR37297|c0_g3_i5	-1.88736	0.869939	0.20578
TR32314|c0_g1_i3	0.185716	-0.5025	-0.0418496
TR32314|c0_g1_i4	-0.378015	0.422024	-0.0835811
TR35024|c0_g4_i1	-1.52862	0.623695	0.343869
TR7830|c1_g6_i1	-0.462343	-0.678072	0.141763
TR40006|c0_g5_i1	-0.836739	0.440573	0.343869
TR31166|c2_g2_i1	-0.704544	-0.0843922	-0.0918903
TR31166|c2_g3_i1	-0.859822	-0.155278	-0.506555
TR31166|c2_g1_i2	-0.558102	-0.292451	0.0370433
TR37323|c1_g2_i1	-0.57168	-1.09174	-0.133777
TR39328|c1_g3_i1	0.030173	-1.85798	0.375705
TR40985|c0_g1_i3	-0.273309	0.169925	-0.01024
TR43249|c1_g5_i1	-0.421701	-0.222392	-0.0882425
TR8112|c0_g1_i1	0.648688	0.485427	0.741832
TR3468|c0_g1_i6	-1.45711	0.0766213	-0.225746
TR36875|c1_g3_i1	-0.31227	-0.742974	0.280488
TR36875|c0_g2_i1	0.807802	-1.48315	0.395917
TR30798|c0_g8_i2	-0.744545	-1.30917	0.5787
TR41409|c1_g1_i1	0.385654	0.925999	0.98976
TR35127|c1_g3_i1	-0.108543	-0.158262	0.288827
TR35127|c1_g10_i2	0.642429	-0.909235	0.248185
TR35127|c1_g5_i1	-0.660889	0.652077	-0.158632
TR26912|c0_g1_i1	-0.0400009	-0.2645	-0.0113968
TR29917|c0_g3_i2	-0.384864	-0.857981	-0.584767
TR29917|c0_g1_i1	-0.247403	-1.60881	-1.16654
TR43095|c2_g8_i2	-0.86916	-0.271302	-1.06552
TR32504|c2_g2_i5	-0.0737779	-0.411991	-0.222023
TR34236|c2_g2_i4	-0.455649	-0.178337	-0.114577
TR39597|c1_g2_i2	-1.86227	-0.0780025	-0.724735
TR39597|c1_g1_i2	-0.489899	0.597902	0.321913
TR34222|c0_g2_i1	0.312042	-0.0699634	0.539865
TR38746|c0_g1_i4	-1.78427	1.078	-0.0187016
TR33494|c0_g1_i4	0.626662	-0.459432	0.248185
TR33494|c0_g1_i2	0.562531	-0.201634	0.125161
TR35827|c0_g3_i7	0.119273	-0.633104	0.646865
TR24716|c0_g1_i1	-0.223156	0.156726	-0.822583
TR24716|c0_g1_i3	-0.466789	-0.0450879	-0.749154
TR24716|c0_g1_i2	-0.344608	0.231006	-0.633443
TR40393|c2_g6_i1	-0.899749	0.509014	0.0637606
TR18288|c0_g1_i1	-2.58466	0.66639	-1.53994
TR38473|c0_g3_i1	-0.856421	-0.602665	-0.708829
TR38473|c0_g4_i1	-0.317145	0.185556	-0.521202
TR38312|c0_g1_i3	0.364459	0.185867	0.886491
TR40518|c0_g6_i5	1.01368	-0.371969	0.648723
TR38134|c1_g4_i2	0.183635	-0.365871	-0.378462
TR38302|c0_g1_i4	0.488747	0.222392	0.0637606
TR2756|c4_g3_i1	-0.255892	0.253757	0.170676
TR2756|c4_g4_i3	0.116467	-0.404842	0.277356
TR28256|c0_g1_i4	-0.163887	-1.13585	0.107235
TR15230|c0_g1_i1	0.00232505	-2	0.0637606
TR34808|c1_g8_i2	-0.00666373	0.296982	-0.00662874
TR43009|c2_g8_i2	-0.40345	-0.847997	0.385689
TR42985|c0_g1_i1	0.608046	0.247928	0.233686
TR42812|c3_g8_i1	0.0493152	-0.190755	0.475485
TR31433|c0_g1_i3	-1.33681	0.628031	-0.0737429
TR38758|c0_g2_i1	-0.127159	-0.963474	-0.177248
TR40094|c1_g6_i1	1.01014	-0.29956	0.587323
TR35998|c0_g1_i1	-1.78427	1.3356	-1.00663
TR35998|c0_g1_i2	0.0277601	0.184425	-0.640784
TR43814|c0_g1_i3	0.13511	-0.938599	-0.211874
TR27609|c0_g3_i1	-0.121306	0.289507	0.0637606
TR27609|c0_g5_i1	1.04862	0.491853	0.385689
TR22803|c0_g1_i1	0.878694	-0.584963	0.0637606
TR16233|c0_g1_i1	0.417363	-0.819428	0.15687
TR31820|c0_g10_i1	0.0486187	-0.0458037	-0.292383
TR29703|c1_g1_i2	-0.25943	0.316027	0.121476
TR26740|c0_g1_i1	0.212652	-0.625479	0.0416397
TR30753|c0_g1_i1	0.0726037	-0.302029	0.0476409
TR29828|c3_g4_i1	-0.365087	-0.479743	-0.295424
TR33439|c0_g5_i8	0.161994	-1.67921	0.433914
TR38522|c2_g1_i2	0.869404	0.664816	0.260797
TR41479|c0_g2_i2	0.865369	-1.31878	-0.605518
TR27164|c0_g3_i1	-0.533728	-0.688056	0.415233
TR38235|c0_g1_i3	-1.83158	1	-0.544661
TR37813|c1_g4_i2	-0.0563509	-0.22741	0.0179569
TR37813|c1_g4_i3	0.232802	0.308122	0.195005
TR27811|c0_g1_i4	0.0486187	-1.67807	-0.848777
TR8034|c5_g12_i1	-1.63988	-1.24793	-0.862239
TR31654|c0_g1_i1	0.788817	0.212221	0.412247
TR31654|c1_g1_i1	-0.285039	-0.274175	-0.279127
TR21282|c2_g1_i1	0.546118	-0.133267	-0.268815
TR38621|c0_g3_i1	-0.536344	-0.192645	0.336779
TR33405|c0_g5_i1	-0.410813	-1	-0.588316
TR40550|c0_g2_i10	-0.149185	-0.105795	0.222307
TR40550|c0_g2_i6	-0.00751866	0.00682127	0.353889
TR43199|c0_g1_i1	-0.465824	-0.492396	-0.529919
TR19488|c0_g1_i1	-0.771888	-0.536053	-0.334789
TR39362|c0_g1_i3	0.182562	2.07455	0.51122
TR39362|c0_g2_i1	0.206451	-1.22651	0.46952
TR41088|c0_g8_i2	-2.09977	0.850857	-0.6992
TR43412|c0_g4_i7	0.105546	0.527247	-0.631385
TR41593|c0_g1_i3	0.256756	0.442518	0.636339
TR22093|c0_g1_i1	-1.93627	-0.463947	-0.557728
TR38907|c1_g6_i1	-0.168282	-0.114171	0.154908
TR38907|c1_g11_i1	-0.493756	0.106915	0.0470173
TR33991|c1_g4_i1	0.199241	0	0.304769
TR33991|c1_g4_i9	0.300262	0.142019	-0.150364
TR33991|c1_g4_i5	0.615136	0.271302	0.11267
TR40962|c0_g1_i5	-0.199309	1.32193	0.326795
TR39353|c0_g1_i2	0.0221507	-1.05319	0.558174
TR35663|c1_g1_i1	0.0230836	0.917538	0.701191
TR35751|c0_g2_i5	0.667425	-0.5025	-0.323263
TR36861|c1_g2_i6	-2.8363	0.1457	-0.95603
TR7584|c1_g1_i6	-1.37063	-0.402098	-0.865585
TR7584|c1_g1_i7	-1.5023	-0.434231	-0.904807
TR3826|c0_g3_i2	-1.02938	-0.192645	-0.476808
TR3705|c0_g1_i2	0.143083	-0.61753	0.139049
TR7852|c2_g8_i1	-0.995775	0.710493	0.189291
TR44878|c3_g6_i2	-0.629943	0.358687	0.0284275
TR7852|c2_g5_i1	0.115787	0.0987782	0.209502
TR7852|c2_g4_i1	-0.199309	0.383329	0.125161
TR7852|c2_g6_i1	0.36257	-0.807355	-0.521202
TR7852|c2_g5_i3	-0.0790146	0.334419	0.240638
TR44878|c3_g9_i1	0.395849	-0.425306	0.0941342
TR42273|c0_g7_i1	-2.11358	0.555215	-0.265547
TR32934|c0_g1_i1	0.117165	-0.442518	-0.909272
TR26476|c0_g1_i1	-0.359773	-1.078	0.275265
TR38406|c3_g7_i1	0.0867423	-0.510962	-0.041209
TR23035|c0_g1_i1	-0.451496	-0.188762	0.16873
TR33344|c0_g2_i1	0.276029	-0.802963	-0.249397
TR28670|c0_g1_i1	0.21801	-0.589535	-0.321157
TR39848|c0_g7_i1	2.40555	1.41504	0.179238
TR31018|c0_g1_i6	-1.20665	0	0.085565
TR39143|c1_g6_i1	0.0989957	-0.0615461	-0.388575
TR28903|c0_g2_i2	-0.456805	-0.530515	-0.0219693
TR40464|c2_g2_i6	0.531695	0.014797	-0.307334
TR37699|c1_g2_i1	-0.494765	0.415037	-0.784236
TR37699|c1_g1_i6	-0.352118	0.124927	-1.52847
TR7883|c0_g3_i1	-0.660443	-1.26849	-0.555635
TR7883|c0_g1_i3	-0.853313	-1.60192	-0.571798
TR41419|c5_g1_i5	0.215729	0.192645	-0.00662874
TR41683|c2_g1_i1	-1.56188	-0.469485	-0.0187016
TR32274|c1_g3_i1	-0.526883	-0.192645	-0.476808
TR30786|c0_g1_i8	0.578299	0.415037	-1.00663
TR43055|c2_g1_i2	-1.2437	0.165059	-0.810709
TR42454|c0_g1_i1	0.19497	-0.504792	0.00772655
TR41507|c0_g2_i1	-0.877381	-1.24511	-0.292383
TR20839|c0_g1_i2	-0.295524	0.175087	0.319018
TR36859|c1_g1_i2	-0.199309	0.932886	0.604329
TR36859|c1_g9_i1	-1.7468	0.337035	-0.326186
TR39268|c4_g5_i1	-0.563362	0.166461	0.0216351
TR37069|c0_g3_i4	-0.0882775	0.31034	-0.187778
TR24132|c0_g1_i1	-0.421701	0.0506261	0.0112932
TR39143|c1_g2_i6	-0.475241	0.272445	-0.130828
TR8019|c0_g1_i1	-0.589543	-0.0252373	0.0967379
TR10582|c0_g1_i1	-0.32484	-0.584963	-0.521202
TR31068|c0_g2_i1	0.589187	0.241008	0.852256
TR44878|c4_g3_i5	-0.462343	0.688056	0.478798
TR41716|c2_g5_i1	-0.75185	-0.252981	-0.201293
TR3657|c1_g3_i4	0.74758	-0.517058	0.196516
TR13535|c0_g1_i1	0.0230836	0.444785	0.0637606
TR28799|c0_g1_i2	-0.54604	0.0451888	-0.155357
TR32043|c3_g1_i5	0.0579892	-0.23043	-0.14269
TR2521|c0_g3_i5	0.34126	-0.78136	0.259681
TR21410|c0_g1_i1	0.609295	-0.289507	0.567803
TR29546|c1_g1_i3	-0.142725	0.62293	0.0346142
TR43079|c0_g1_i1	-0.810744	-0.137504	0.259681
TR43079|c0_g4_i2	-0.819278	-0.307182	0.00321905
TR23335|c0_g1_i1	-0.479417	0.0824622	0.298226
TR31813|c2_g1_i1	0.535101	-0.235216	0.538202
TR40550|c0_g5_i1	0.566226	-0.447459	0.179238
TR40550|c0_g2_i1	0.0416993	0.398549	0.445631
TR40550|c0_g2_i9	-0.247062	-0.25634	0.0637606
TR42999|c0_g8_i1	-0.894454	-0.443607	-0.116812
TR2750|c4_g2_i1	-2.00269	0.257725	-0.245308
TR16253|c0_g1_i1	0.586566	-0.376854	0.428172
TR26209|c0_g2_i1	-0.639881	0.316857	-0.15442
TR39682|c0_g1_i11	-1.03983	-0.179324	0.336133
TR30820|c0_g2_i2	0.401084	-0.656516	-0.0745188
TR18579|c0_g1_i1	-1.02938	-0.415037	-0.351277
TR42008|c0_g2_i1	0.213554	-0.517058	-0.0166581
TR30783|c0_g1_i1	-0.0148842	-0.371969	0.209191
TR19875|c0_g1_i2	-5.4661	0.621957	-0.290137
TR19631|c0_g2_i1	0.0293156	-0.698619	0.376918
TR24719|c0_g1_i1	-1.78427	0.695145	0.371883
TR38406|c3_g1_i8	-1.19931	1.0199	0.385689
TR38406|c3_g1_i3	-0.155455	0.530515	0.223756
TR38994|c0_g1_i6	0.042664	0.605721	0.417943
TR8127|c1_g2_i1	-0.303645	0.68226	0.0298133
TR32262|c0_g4_i2	-0.376187	-0.530515	-0.388752
TR37836|c2_g2_i1	0.0782252	-1.1375	0.276754
TR41842|c0_g5_i3	-0.757799	-0.584963	-0.231695
TR2521|c0_g4_i2	0.68966	0.415037	0.353267
TR43009|c2_g7_i2	0.123868	-1.40054	0.426331
TR38907|c1_g1_i2	-0.895011	0.191184	0.129414
TR41716|c2_g2_i4	-0.573704	-0.881356	-0.767842
TR33442|c0_g4_i1	0.0297783	-0.313565	0.167317
TR39540|c1_g1_i2	0.00714207	0.691878	-0.314751
TR2254|c0_g1_i1	1.15433	-0.569532	0.867417
TR3360|c1_g1_i1	0.584434	-0.787006	0.456078
TR30734|c0_g2_i1	0.684894	-0.786405	0.569868
TR28382|c0_g1_i1	0.640101	-0.781895	0.445233
TR34727|c0_g1_i1	0.410151	-0.825212	0.158207
TR40179|c3_g4_i1	-2.12531	0.634716	-1.01424
TR47674|c0_g1_i1	0.198514	-0.297132	0.638154
TR32070|c0_g1_i2	-0.504163	0.662965	0.737532
TR32070|c0_g1_i9	0.499087	-1.2402	0.425839
TR10620|c1_g1_i1	0.134692	-0.0430687	0.00814661
TR43131|c2_g5_i1	-0.0148842	-1.28951	-0.810709
TR43131|c2_g3_i2	-0.591626	0.222392	0.426331
TR3595|c1_g5_i1	-0.140415	0.148392	0.15687
TR43131|c2_g3_i1	-0.199309	0.132974	0.23258
TR43131|c2_g2_i1	-0.213476	0.322868	0.252877
TR37452|c0_g3_i1	1.43296	1.26303	0.829295
TR31481|c0_g2_i1	-0.436348	-0.429684	-0.0979905
TR43793|c1_g1_i4	-1.23173	0.774933	-0.673205
TR3937|c0_g4_i1	0.739291	0	0.179238
TR36625|c0_g1_i2	-1.36394	0.472233	-0.351277
TR3109|c0_g2_i1	1.03202	0.520832	0.347554
TR37424|c1_g1_i5	-0.129023	-0.0807941	0.0373288
TR27372|c0_g1_i2	0.6245	0	0.208902
TR3080|c1_g1_i2	-0.388787	-1.34994	-0.419448
TR29042|c0_g1_i1	-1.45431	0.237283	-0.364773
TR30166|c0_g3_i2	0.961156	0	-0.216347
TR35265|c2_g7_i14	-0.255892	0.0544478	0.0637606
TR35265|c2_g7_i1	-0.137908	0.334419	-0.0674839
TR29712|c0_g1_i1	0.00232505	-0.621488	0.265394
TR24593|c0_g1_i8	4.24348	-0.697073	-0.00528106
TR39443|c0_g6_i1	-0.199309	-0.884523	0.0516878
TR23853|c0_g1_i2	0.413668	-0.0874628	0.0637606
TR32537|c1_g1_i1	0.167119	-0.420843	0.0981121
TR32149|c1_g1_i1	-0.784271	0.736966	-0.199274
TR26083|c1_g2_i1	-0.636173	-0.255257	-0.271224
TR27168|c0_g2_i1	1.09347	0.807355	0.265394
TR33882|c0_g1_i2	-0.0160016	-0.646768	0.205489
TR33882|c0_g1_i1	-0.326199	-1.0264	0.095185
TR34926|c0_g1_i2	-0.60156	-0.873043	-0.266755
TR31018|c0_g1_i2	-0.30695	-0.26115	0.00931281
TR35620|c3_g4_i1	-0.936274	-0.321928	-0.0357751
TR41602|c0_g5_i1	-0.391954	0.0874628	0.233686
TR25834|c0_g1_i2	0.245476	1.03953	0.871116
TR44682|c0_g3_i3	0.224499	-0.313158	0.434129
TR26339|c0_g2_i3	-1.66497	0.0727563	-0.88733
TR23348|c0_g1_i2	1.93621	0.165059	0.341295
TR38183|c0_g4_i11	0.778323	-0.215013	0.170676
TR2435|c0_g2_i1	-3.29749	-0.42456	0.608623
TR38224|c0_g4_i1	1.15433	-0.36257	0.893836
TR39685|c0_g2_i1	0.0230836	0.302563	0.111066
TR39685|c0_g2_i2	-0.891187	0.389042	-0.328557
TR41324|c0_g2_i4	-1.45711	-0.273565	-0.0310986
TR35840|c2_g1_i1	-0.367253	0	-0.234581
TR35840|c2_g7_i1	-1.06721	0.4468	-0.280574
TR35840|c2_g6_i2	0.61252	-0.665581	-0.128884
TR37666|c1_g1_i2	0.19216	0.0780025	0.129052
TR32694|c3_g1_i7	-0.352555	-0.864871	0.0932797
TR32694|c3_g1_i6	0.636554	-1.41304	0.0707277
TR40761|c1_g2_i1	-0.729824	0.547488	-0.466754
TR37192|c0_g8_i1	-0.849724	-0.134017	-0.232224
TR32235|c2_g1_i1	0.50696	-0.31719	0.173385
TR43709|c0_g7_i3	0.527673	-0.0506261	0.11267
TR40628|c1_g1_i3	-0.0680643	0	0.195005
TR40628|c1_g1_i1	-0.654988	0.247928	0.0333869
TR43927|c0_g2_i5	-0.553974	-0.402759	-0.199274
TR34911|c0_g4_i3	-1.88381	-0.2824	-0.784236
TR42256|c0_g1_i4	-0.383733	-1.64386	-0.410171
TR41112|c3_g1_i3	0.189733	0.115477	-0.00662874
TR26071|c2_g2_i4	0.0164199	-0.0580321	-0.0324547
TR26071|c2_g2_i3	-0.434937	0.058103	-0.126064
TR37126|c0_g1_i3	0.242397	-0.744161	-1.19497
TR33318|c2_g1_i3	-0.552946	-0.938599	-0.372339
TR36806|c0_g3_i2	-0.0108637	0.274175	-0.0771019
TR3504|c1_g6_i4	-0.640578	0.390459	-0.11227
TR17911|c0_g1_i1	0.648688	0.584963	-0.258168
TR38478|c0_g2_i3	0.0175026	-0.565597	0.469017
TR43590|c1_g6_i3	-0.153985	-2.46713	-0.513548
TR29492|c0_g1_i1	1.38565	0.321928	0.871116
TR2294|c0_g5_i1	0.823775	0.472068	-0.802973
TR30237|c2_g3_i1	-0.938718	0.0145728	-0.0825578
TR34242|c0_g2_i2	0.164014	-0.470267	-0.125985
TR31081|c0_g4_i1	-0.608421	-0.36257	0.231705
TR41359|c1_g8_i2	-0.421701	-0.263034	-0.199274
TR42007|c0_g2_i1	-0.65334	0.356144	0.0637606
TR3151|c0_g2_i1	-0.56489	-3.2342	-0.195779
TR42283|c1_g1_i9	-0.0158627	0.346176	0.289642
TR38787|c0_g1_i1	0.137726	-0.198857	0.0141027
TR32080|c2_g2_i2	0.164966	0.837729	0.367153
TR41868|c1_g9_i1	0.0175026	0.867362	0.158088
TR37020|c1_g3_i2	0.825353	-0.610053	0.293242
TR42670|c0_g6_i3	0.452768	0.251539	-0.284163
TR22423|c0_g1_i1	-0.144167	0.405639	0.223239
TR39633|c3_g6_i1	-0.114335	-0.297165	0.717505
TR2968|c0_g1_i5	0.151188	-0.367732	0.0272347
TR44093|c1_g4_i5	-0.044278	-0.57289	0.0144329
TR32028|c2_g2_i1	0.198284	0.0274807	-0.323796
TR2756|c4_g4_i6	0.186148	-0.37479	0.146518
TR35624|c0_g6_i1	0.215729	-0.263034	0.286153
TR41741|c0_g7_i3	0.171659	-0.320401	-0.0335935
TR40656|c0_g4_i3	0.320065	-2.152	-0.11521
TR40656|c0_g4_i1	0.27276	-3.14684	-0.498118
TR41733|c0_g3_i3	0.0934729	0.137504	0.233686
TR31199|c1_g1_i1	0.510563	-0.0339473	-0.00495216
TR42665|c2_g3_i4	-0.160835	-0.817136	0.34616
TR35255|c1_g3_i1	0.979161	-1.53214	0.112622
TR38359|c1_g8_i1	0.754521	-0.403722	0.214627
TR2836|c0_g4_i1	-0.733645	-0.932886	-0.421666
TR4113|c0_g6_i3	0.0392033	-0.165878	0.152812
TR7700|c0_g1_i1	-0.0981621	-0.506536	0.419149
TR7831|c0_g2_i1	0.309849	0.0350186	0.202231
TR43913|c1_g1_i3	-1.38999	0.0801703	-0.54196
TR43913|c1_g1_i4	-0.987005	0.462627	-0.185267
TR40132|c0_g7_i3	-1.22484	0.296393	-0.245567
TR40132|c0_g7_i1	-0.976916	-0.0201779	-0.433739
TR37027|c0_g1_i4	-0.855354	0.0544478	-0.427226
TR37297|c0_g2_i1	-0.964844	-0.332575	-0.165721
TR29727|c1_g1_i2	0.578299	-0.415037	0.3008
TR32275|c2_g2_i1	0.267009	-0.270648	-0.229971
TR39140|c0_g1_i5	-1.44586	-0.0912681	-0.263706
TR41507|c1_g2_i2	0.241264	-0.106915	0.919371
TR37161|c3_g1_i2	-0.812286	-0.530515	0.363321
TR43620|c0_g2_i1	-1.43197	0.837729	0.153028
TR43079|c0_g2_i1	-0.642915	-0.0874628	0.2617
TR11161|c0_g1_i1	0.800691	0	0.648723
TR8026|c0_g1_i2	0.771545	0	0.0048669
TR39306|c0_g3_i1	0.144646	-0.612977	-0.636679
TR2756|c4_g4_i5	-0.199309	-0.247928	0.180406
TR39127|c1_g1_i3	-0.383021	-1.52356	1.06376
TR36180|c0_g3_i3	0.23691	-0.12353	0.626527
TR35340|c1_g1_i2	-0.137908	0.176878	-0.0674839
TR35340|c1_g1_i7	-0.00666373	0.36257	-0.00662874
TR40342|c0_g4_i5	0.299145	0.592576	-0.13216
TR37305|c0_g3_i2	-0.365194	-0.258613	0.077323
TR29939|c0_g1_i2	1.33674	0.378512	0.648723
TR29939|c0_g1_i1	-0.248218	0.359896	0.244333
TR29939|c0_g1_i5	-0.0838316	-0.17897	0.111066
TR29939|c0_g1_i4	0.325353	0.395929	0.380618
TR42576|c0_g2_i1	-1.86227	-1.66297	-0.599204
TR2413|c0_g1_i2	-0.457621	0.177787	0.0399138
TR39443|c0_g6_i2	-1.04941	-0.655089	0.473523
TR8291|c0_g7_i2	0.300262	-0.465664	0.0131345
TR28835|c0_g1_i4	0.315264	0.0995357	0.130875
TR31444|c0_g1_i3	-1.43693	0.346067	-0.234427
TR36912|c0_g8_i3	-0.897928	0	0.3886
TR30129|c0_g5_i1	-0.176589	0	-0.13216
TR31886|c0_g1_i1	-0.614346	0.169925	0.0637606
TR16221|c0_g1_i1	-0.343699	-0.14439	-0.158632
TR39143|c1_g4_i1	0.71086	-0.56242	-0.100496
TR2714|c0_g2_i1	0.0637256	-0.0588937	-0.410171
TR34236|c2_g3_i1	-0.978019	-0.0259485	-0.134406
TR40442|c1_g2_i1	0.64315	-1.39855	-0.270658
TR40442|c1_g1_i1	0.299293	-1.34192	0.226314
TR28919|c0_g1_i1	0	-0.295456	-0.298809
TR28919|c0_g1_i5	0.286118	0	-0.0565336
TR28919|c0_g1_i4	0.331206	0.0780025	-0.298809
TR40442|c1_g4_i1	0.590178	-0.261528	0.442562
TR32362|c1_g2_i6	0.0400014	-0.138828	0.693607
TR32362|c1_g2_i4	-0.00136943	0.0680782	0.753905
TR24410|c0_g1_i1	-0.0747637	0.345387	0.0755378
TR41805|c1_g1_i1	-0.218674	0.457682	0.0443953
TR2255|c10_g4_i1	-0.720141	2.57766	1.63408
TR2255|c10_g1_i1	-3.68657	2.05632	1.08655
TR2255|c10_g3_i3	-0.247807	1.58496	1.44868
TR35448|c0_g2_i1	-0.515568	-1.70328	0.214627
TR27415|c0_g1_i2	0.909813	-0.890878	0.631445
TR34289|c0_g2_i1	-0.877381	0.70044	-0.0293488
TR33259|c0_g1_i2	0.501131	-0.0824622	0.286153
TR44697|c14_g2_i1	0.0807991	-1	-0.0431546
TR29676|c0_g3_i1	-2.04973	-1.01217	-0.545655
TR29676|c0_g3_i2	-1.64777	-1.7855	-0.68426
TR37330|c2_g3_i2	-0.773044	-0.356144	-0.32153
TR41291|c0_g3_i1	0.122619	-0.584963	-0.521202
TR8238|c0_g2_i2	0.990516	-0.752072	-0.476808
TR42613|c1_g2_i1	-0.498869	0.392317	-1.12888
TR27122|c0_g2_i2	0.278013	1.28177	0.00604509
TR3925|c0_g4_i5	-0.515336	0.0692627	-0.581575
TR7867|c1_g3_i1	-0.327064	0.365284	-0.063995
TR2349|c0_g1_i1	1.1792	-0.514573	-0.258168
TR31494|c0_g4_i5	-1.39195	0.115477	-0.351277
TR20806|c0_g1_i1	-0.292418	0.0443941	-0.543922
TR36326|c1_g5_i7	-0.327633	-0.162271	0.0327337
TR36909|c0_g1_i1	-0.261593	-0.449307	-0.253097
TR30424|c0_g1_i1	-0.212606	0.0897967	0.571701
TR36345|c0_g3_i1	-0.144861	-0.176878	0.340601
TR39952|c2_g8_i1	-0.148683	0.237039	-0.220032
TR36720|c0_g2_i1	0.0239786	-0.119277	0.608761
TR33372|c0_g1_i2	0.10905	0.418104	0.45403
TR28426|c0_g3_i1	-1.02243	0.231326	-0.372339
TR39105|c0_g1_i2	-0.591626	0.192645	-0.628117
TR39392|c0_g4_i1	-0.128919	-0.463947	0.0993845
TR34236|c2_g1_i2	-0.297993	-0.0484985	0.122177
TR8050|c1_g1_i1	0.350888	-0.347923	0.0637606
TR19603|c0_g2_i1	-0.253757	-1.05445	-0.369199
TR35854|c0_g1_i4	-0.00983101	-0.325095	0.286153
TR33989|c0_g2_i1	-0.0882775	0.214125	-0.120664
TR32362|c1_g4_i1	-1.00666	-0.428843	0.326795
TR42317|c0_g1_i1	-0.279479	-1.4021	-0.287712
TR40635|c1_g1_i1	1.45648	-1.20436	-0.416232
TR35376|c0_g1_i3	0.780513	-0.847997	0.103289
TR8193|c0_g1_i1	-0.694073	-1.49476	0.109564
TR41934|c0_g6_i1	-1.44323	0.811928	0.186617
TR41934|c0_g6_i2	-0.248218	-2.40439	-0.0187016
TR44623|c0_g1_i1	-0.948501	0.204014	-0.26274
TR44623|c0_g1_i2	0.150025	-0.373908	-0.0105868
TR43674|c0_g1_i1	-0.67219	-0.239291	-0.259743
TR32043|c3_g1_i3	-0.336045	-0.197037	-0.310919
TR31705|c0_g2_i10	-1.8635	0.30791	-0.644732
TR32959|c0_g5_i3	-0.847007	-1.16227	-0.536632
TR2750|c4_g3_i7	-0.791651	-0.163499	-0.193397
TR30744|c1_g2_i1	-0.127756	-0.154723	0.2364
TR41915|c0_g7_i1	-0.521237	-1	-0.410171
TR41915|c0_g4_i2	-1.10113	-1.10535	-0.13179
TR31301|c0_g1_i3	-1.35909	-0.920773	-0.913156
TR30240|c3_g3_i3	-0.851386	-0.137504	-0.50014
TR21450|c0_g1_i1	0.744108	-0.490986	-0.0219693
TR35024|c0_g1_i1	-1.51051	0.682104	0.236076
TR3979|c0_g2_i6	-0.186133	-1.41063	-0.295033
TR2782|c0_g9_i1	-0.65874	-0.459432	0.318574
TR37263|c3_g1_i1	0.768982	0	0.99963
TR8287|c2_g2_i1	-0.336812	-0.652077	0.0637606
TR29370|c0_g4_i1	-2.63227	0.421701	-0.178057
TR31737|c1_g2_i1	0.544852	1.01792	0.970651
TR32822|c0_g1_i2	-0.468495	-0.773229	-0.320903
TR2425|c0_g2_i3	0.835738	-1.30869	0.380951
TR35068|c0_g3_i1	-1.16278	-0.241008	-0.414287
TR33606|c1_g7_i3	-0.0422078	-0.176323	0.774963
TR31813|c3_g1_i1	0.847997	-0.138216	0.247473
TR34121|c0_g3_i1	-0.292418	0.0297473	-0.273274
TR34080|c1_g1_i1	0.169925	1.11548	0.122654
TR34121|c0_g3_i2	-0.742931	0.831123	-0.0226542
TR34080|c2_g3_i4	0.206684	0.608809	0.0993845
TR34775|c0_g2_i4	-0.0690524	-0.0229004	0.0863032
TR39876|c0_g8_i1	-0.116847	-0.280108	-1.21635
TR41131|c0_g3_i1	-0.258202	-0.473931	-0.772741
TR7761|c1_g7_i1	-0.848183	0.216886	-0.0775953
TR33931|c0_g3_i6	0.13511	-0.201634	0.447089
TR37377|c0_g1_i1	0.704908	-0.777608	-0.2358
TR42317|c0_g3_i1	-0.621457	-0.0257631	0.105702
TR42317|c0_g3_i2	-0.162529	-0.242857	0.120214
TR27259|c0_g1_i1	1.22931	0.0906704	0.677037
TR3270|c0_g1_i1	1.28612	-0.321928	0.15687
TR43440|c0_g1_i1	0.260123	0.807355	0.871116
TR23512|c0_g1_i2	-1.36923	-0.584963	-0.298809
TR29264|c0_g1_i2	-1.45738	-0.708234	-0.359592
TR36962|c0_g5_i3	-1.63227	0.704544	0.215764
TR44560|c0_g3_i1	-0.421701	0.893085	0.426331
TR41716|c2_g4_i2	-1.35543	-0.0565835	-0.363661
TR41192|c0_g4_i2	0.215729	0.415037	0.179238
TR3718|c0_g3_i3	0.0524375	0.46226	0.428635
TR7805|c1_g8_i5	1.84022	-1.62244	0.619661
TR7805|c1_g6_i1	0.22675	-0.9141	0.115912
TR24755|c0_g1_i2	0.532202	-0.920566	0.00826548
TR35032|c1_g1_i3	0.74555	-1.8625	0.723685
TR33670|c0_g4_i1	0.1762	-0.351472	0.661662
TR35614|c2_g5_i1	-0.146841	0.199309	0.42435
TR42786|c0_g1_i1	1.69378	0	0.426331
TR34287|c2_g1_i1	-0.540346	0.0740006	-1.18417
TR34287|c2_g3_i1	-0.125308	0.178337	-0.0548839
TR34287|c2_g3_i2	0.0331373	-0.277228	0.419589
TR38140|c0_g2_i2	-0.684736	-0.321928	-0.421666
TR31829|c0_g1_i1	0.215729	-0.263034	0.478798
TR29747|c0_g2_i2	0.554051	1.06054	0.182405
TR29747|c0_g2_i3	0.19662	0.243926	0.0637606
TR36343|c0_g1_i2	0.133817	-0.436712	0.249101
TR36343|c0_g1_i4	0.235139	-0.397281	0.416621
TR41901|c0_g4_i4	1.06721	-0.275634	0.364627
TR24668|c0_g1_i1	0.239976	-0.39079	0.0880081
TR36239|c0_g1_i1	0.473852	-0.777608	-0.249242
TR39570|c0_g2_i6	-1.09239	-0.241008	0.450784
TR41424|c0_g1_i3	0.0393487	-1.15285	-0.990687
TR26943|c0_g1_i1	2.13335	-0.83727	0.0420655
TR37644|c0_g1_i1	-0.106994	0.390197	0.583726
TR31312|c0_g1_i1	-0.0146418	-0.0810366	-0.109958
TR35966|c2_g1_i3	-0.199309	-0.455679	0.800726
TR35966|c2_g1_i2	-0.57782	-0.922832	0.185323
TR35966|c2_g1_i4	0.32676	-0.556393	0.943466
TR35381|c0_g1_i4	-1.30199	-0.748021	0.190209
TR35381|c0_g1_i2	-1.57355	-0.752749	0.252118
TR35966|c2_g1_i1	-0.559398	-0.525374	0.5089
TR39132|c2_g1_i5	0.470901	0.160134	0.39818
TR3301|c0_g1_i2	-0.915516	0.0614005	-0.000369748
TR7729|c1_g3_i1	-0.663712	-0.57836	-0.212571
TR2858|c0_g3_i1	0.617827	-0.438121	-0.869125
TR2994|c0_g3_i2	-1.08683	0.0384741	0.280572
TR2994|c0_g1_i1	-2.19931	0.378512	0.179238
TR38410|c1_g1_i1	0.474705	0.210767	0.142616
TR2394|c0_g2_i10	0.0824622	-0.148863	-0.323263
TR44402|c0_g1_i1	-0.0838316	-0.0614005	0.179238
TR35145|c0_g1_i6	0.482162	-0.442518	0.0907276
TR8002|c2_g4_i5	-0.0473057	0.152003	0.353267
TR8002|c2_g4_i3	-0.252748	0.0515303	-0.308208
TR30416|c0_g1_i1	0.24815	0.966833	1.47058
TR30416|c0_g1_i2	0.0262509	1.53222	1.39894
TR33090|c2_g2_i5	-0.899749	-0.76184	-0.577785
TR33090|c2_g2_i4	-1.31252	0.316474	-0.709964
TR42532|c0_g3_i1	0.163261	-0.222392	0.0637606
TR42532|c0_g1_i1	-0.0962153	0.289507	0.00931281
TR23104|c0_g1_i1	-0.474943	0.176878	-0.000369748
TR42532|c0_g12_i1	0.307044	-0.731511	-0.128884
TR42532|c0_g13_i1	0.117881	-0.573185	-0.166537
TR7729|c1_g1_i2	-1.11185	-1	-0.688312
TR7729|c1_g1_i6	0.336744	-0.736966	-0.258168
TR7729|c1_g1_i7	-1.45918	0.247093	-0.086482
TR41600|c0_g1_i4	0.215729	-0.231326	-0.0472707
TR41600|c0_g1_i6	-0.948501	0	-0.432665
TR41600|c0_g1_i1	-0.57934	0.14439	-0.397571
TR37219|c1_g1_i1	0.0416993	-0.459432	-1.07374
TR40762|c2_g3_i6	0.152164	-0.103093	0.563332
TR35691|c0_g6_i1	1.5169	0.625604	0.29203
TR39748|c0_g2_i3	-0.409876	0.0247224	0.0494409
TR34205|c0_g1_i1	0.0281017	-0.685127	-0.0270049
TR41641|c0_g5_i1	-1.15749	-0.246161	-0.157454
TR32707|c0_g2_i1	0.44417	-1.16993	0.091775
TR24308|c0_g1_i1	0.270176	0.584963	0.611248
TR33907|c0_g2_i1	0.864822	-0.552541	0.774254
TR26436|c0_g2_i1	-0.20782	0.479352	0.0119217
TR39264|c0_g1_i3	-0.94777	-1.30485	0.371883
TR39037|c0_g3_i1	-0.632268	-0.847997	-0.521202
TR16203|c0_g1_i2	-0.443234	-0.134301	-0.521202
TR39037|c0_g1_i2	0.321928	0.0395284	-0.333575
TR42669|c0_g3_i6	0.53881	-0.380822	0.188089
TR43055|c2_g2_i4	-1.39396	1.14639	-0.867852
TR37669|c2_g2_i6	0.72407	-0.303392	0.0637606
TR42273|c0_g4_i5	-1.4694	-0.270089	-0.708829
TR28190|c0_g2_i2	1.63468	0.176878	-0.874839
TR42273|c0_g4_i6	-0.458953	0.0335526	0.130103
TR28118|c0_g2_i1	0.256061	-0.577545	0.429632
TR42273|c0_g3_i3	0.18007	-0.687117	0.0524453
TR42273|c0_g4_i7	-1.69142	-0.181963	-0.656622
TR42273|c0_g4_i4	-1.38237	0.0922916	-0.441234
TR35565|c0_g1_i2	0.34757	0.275509	0.109293
TR7156|c0_g1_i1	-1.71481	-3.21594	-0.479751
TR30753|c1_g2_i1	-0.109111	-0.494765	0.501882
TR3305|c1_g1_i1	-2.30562	-0.923243	-0.375124
TR41654|c0_g6_i1	-1.10053	0.39502	0.0466195
TR7956|c1_g3_i4	0.215729	0	-0.869125
TR41633|c0_g5_i1	-0.701809	-1	-1.32326
TR30171|c0_g7_i1	-0.713882	0.222392	-0.521202
TR30171|c0_g4_i2	-0.644094	0.21818	-0.506555
TR42790|c0_g3_i5	-0.447236	-0.788496	-0.376812
TR44469|c1_g5_i1	-0.639881	0.50696	0.623188
TR36448|c0_g2_i2	-0.279479	1.88858	0.176235
TR39415|c0_g1_i1	-1.46234	-1.16993	-0.936239
TR44165|c0_g5_i1	0.220068	-0.185215	0.0637606
TR44165|c0_g3_i1	-1.66497	0.601451	-0.0937807
TR22739|c0_g2_i1	0.399329	-1.54432	-0.284163
TR44165|c1_g7_i1	0.16518	-0.525723	0.428249
TR22739|c0_g1_i1	-0.483102	-0.442782	-0.393097
TR44165|c0_g8_i4	-0.230635	-0.280354	0.0429521
TR36537|c2_g4_i1	-0.634246	-0.575115	-0.398144
TR8127|c1_g3_i1	-0.243703	-1.1375	-0.588316
TR41667|c1_g1_i1	-0.354031	-0.560715	0.0637606
TR17341|c0_g1_i3	0.516898	-0.222392	-0.573669
TR17341|c0_g1_i1	-0.57782	-0.893085	-0.314751
TR28029|c0_g1_i4	0.014816	0.526069	0.0637606
TR39252|c0_g1_i7	-0.809362	0.665581	0.20578
TR33448|c1_g7_i4	-0.415037	-0.311944	-0.405725
TR39879|c0_g1_i1	-0.872498	-0.238787	-0.090962
TR17759|c0_g1_i1	-0.0923936	0.206451	0.533246
TR8287|c2_g2_i4	-1.13791	-0.201634	-0.137873
TR29546|c0_g1_i1	-0.447236	0.14439	-1.01424
TR37982|c1_g2_i2	-0.573704	0.156119	-0.310635
TR37087|c1_g1_i1	-0.498869	0.0874628	0.151223
TR28579|c0_g2_i1	-0.357374	-0.461134	-0.125001
TR3817|c0_g3_i1	0.05223	0.817136	0.529424
TR43793|c1_g1_i5	-1.03884	-0.628031	-0.165721
TR35617|c0_g2_i1	-0.0363702	-1.20163	0.154908
TR44720|c2_g3_i2	0.377192	0.593375	0.161608
TR25753|c0_g2_i1	-1.13219	0.607683	-0.521202
TR35628|c0_g1_i1	-0.0394005	0.366674	0.354708
TR35638|c0_g1_i3	-0.494765	-0.169925	0.0637606
TR41675|c1_g2_i1	-0.57782	0.621488	1.00718
TR35203|c0_g1_i2	-0.391954	0.754888	-0.476808
TR39859|c0_g2_i1	-0.369234	1	0.800726
TR24793|c0_g1_i1	-1.15351	0.331206	-0.305473
TR36424|c2_g2_i1	-1.36923	-0.50696	0.308873
TR42297|c2_g4_i3	0.55329	-1.72022	0.549989
TR42297|c2_g4_i1	-0.0396521	-0.359832	0.61246
TR43079|c0_g12_i1	0.547925	-0.0524674	0.541808
TR43079|c0_g18_i2	-1.3213	-0.817136	0.313739
TR43079|c0_g18_i1	-0.8852	-0.165059	0.0831259
TR7973|c0_g7_i3	-0.474943	-0.436099	0.184055
TR27234|c0_g4_i2	-0.199309	-0.103093	-0.334789
TR42742|c1_g3_i1	-0.40576	-0.206451	-0.521202
TR7677|c0_g1_i4	-0.864442	0.271673	-0.1608
TR34562|c1_g2_i7	-0.217011	-0.450661	-0.264044
TR34492|c1_g2_i1	-1.19931	-0.793549	-0.314751
TR39842|c1_g5_i1	-0.0293838	0.662965	-0.128884
TR37083|c1_g2_i3	-1.38834	-0.341037	-0.639846
TR7851|c0_g2_i5	0.649911	-0.935391	0.467049
TR41654|c0_g7_i1	-0.166519	-1.01668	-0.0754022
TR41654|c0_g9_i2	0.0623965	-0.017643	0.116968
TR30871|c0_g1_i1	1.84593	-2.38131	-0.114332
TR26286|c0_g2_i5	-0.403667	-0.0554951	0.1172
TR26286|c0_g2_i1	-0.373338	-0.874469	-0.903818
TR44529|c2_g4_i2	-1.18724	0.556393	-0.246095
TR42132|c0_g7_i1	-0.199309	-0.584963	-0.14269
TR7637|c0_g1_i2	0.494588	-0.839535	0.468151
TR42385|c0_g6_i1	0.608046	0.169925	0.233686
TR35344|c0_g3_i2	-0.430634	-0.231326	0.00931281
TR44529|c2_g1_i8	-0.540796	-0.222392	-0.290627
TR37121|c0_g3_i4	0.385654	0.584963	0.478798
TR42500|c2_g3_i2	-0.199309	-0.359081	0.0390985
TR35731|c3_g1_i1	0.542158	-1.85704	-0.292383
TR33403|c0_g2_i1	-0.35685	-0.103093	-0.0937807
TR37305|c0_g2_i5	-0.525079	0.103623	-0.320903
TR34562|c1_g2_i4	0.731429	-1.19265	-0.0782584
TR34562|c1_g2_i2	-1.24993	-2.05063	-0.584767
TR34562|c1_g2_i1	0.0605232	-0.313158	-0.257368
TR39290|c0_g6_i1	0.859585	-0.263034	0.179238
TR7629|c0_g1_i1	-0.237783	-0.389947	-0.0142419
TR38073|c0_g2_i1	-0.384864	-0.500429	-0.584767
TR41152|c1_g3_i6	0.935851	-0.485427	0.233686
TR29957|c0_g2_i2	1.11556	-0.187627	0.098526
TR8164|c0_g1_i2	-3.39432	-0.873088	0.620817
TR44581|c3_g3_i1	0.0351564	0.4975	-0.116812
TR41841|c1_g1_i2	0.0568392	-1.40682	-0.0655224
TR32024|c0_g5_i2	0.207834	-0.362851	0.0278906
TR32449|c2_g1_i4	-0.00826052	-0.820179	-0.347027
TR30805|c0_g1_i4	0.0121953	-0.788496	0.903296
TR40614|c0_g2_i4	-0.597858	0.142019	0.293242
TR40614|c0_g2_i3	-0.281771	0.473931	0.751817
TR34646|c0_g1_i2	0.286118	-0.605721	0.21988
TR42670|c0_g6_i1	0.17266	-0.180572	-0.0788438
TR42236|c0_g2_i1	-0.199309	0.220266	0.463848
TR25693|c0_g2_i1	-0.441879	-0.509674	0.0112932
TR40151|c0_g1_i6	0.357909	-0.24664	0.29203
TR43848|c1_g4_i3	0.321523	1.09115	0.627661
TR33466|c0_g1_i1	0.526516	1.25376	0.221302
[truncated: 36,041 more rows]

## Sheet:  Differentially expressed Trans
Transcript ID	log2FoldChange( OB_P1 Vs. AMPHID2 )	log2FoldChange( OK_P2 Vs. AMPHID2 )	log2FoldChange( F1 Vs. AMPHID2 )	Hit Description
TR26365|c0_g1_i2	1.79787	1.07146	1.35378	PREDICTED: ferredoxin-1, chloroplastic
TR44738|c7_g1_i2	1.1792	2.11548	1.01485	hypothetical protein MIMGU_mgv1a000542mg
TR35491|c1_g4_i1	1.08867	2.43172	2.67092	hypothetical protein MIMGU_mgv1a012489mg
TR33934|c1_g1_i3	2.27094	1.62722	2.43802	PREDICTED: probable xyloglucan endotransglucosylase/hydrolase protein 7
TR33934|c1_g1_i2	2.67894	1.11974	2.37268	hypothetical protein MIMGU_mgv1a011266mg
TR33934|c1_g1_i4	1.1319	1.13327	2.15396	PREDICTED: probable xyloglucan endotransglucosylase/hydrolase protein 7
TR38404|c0_g1_i2	1.77531	1.74366	2.09693	NA
TR44609|c8_g2_i1	3.26012	1.10692	2.06376	NA
TR32277|c1_g5_i1	1.55071	1.06413	1.64872	PREDICTED: auxin-induced protein AUX22-like
TR38404|c0_g1_i1	1.2434	1.24257	1.64193	cytochrome P450 CYP79D40
TR42745|c0_g2_i1	1.73929	1	1.56626	PREDICTED: uncharacterized protein LOC105165458
TR43836|c1_g1_i1	1.0808	1.36257	1.50433	PREDICTED: serine/threonine-protein phosphatase 6 regulatory subunit 3
TR25295|c0_g2_i1	1.1792	1.26303	1.49672	hypothetical protein MIMGU_mgv1a026173mg
TR32797|c2_g2_i3	1.47312	1.12928	1.49003	PREDICTED: probable S-adenosylmethionine-dependent methyltransferase At5g37990
TR30066|c0_g1_i5	1.11103	1.1635	1.4643	PREDICTED: cytokinin riboside 5'-monophosphate phosphoribohydrolase LOG3
TR38367|c0_g7_i3	1.38565	1.26303	1.44227	PREDICTED: uncharacterized protein LOC105176972
TR4050|c0_g1_i1	1.01081	1.15078	1.35355	PREDICTED: transcription factor bHLH35
TR44469|c1_g3_i1	1.52316	1.48543	1.32679	hypothetical protein MIMGU_mgv1a000390mg
TR44652|c0_g3_i3	1.30319	1.9386	1.28615	PREDICTED: plasma membrane ATPase 4-like
TR7963|c0_g1_i4	1.53766	1.22239	1.28615	PREDICTED: palmitoyl-protein thioesterase 1-like
TR32369|c0_g3_i1	1.28612	1.07039	1.20126	hypothetical protein VITISV_018472
TR32032|c1_g1_i6	1.19689	1.29999	1.18759	PREDICTED: glycine-rich cell wall structural protein 1.8-like
TR42086|c4_g4_i3	1.78492	1.35908	1.18405	PREDICTED: UPF0481 protein At3g47200-like
TR2636|c0_g2_i1	1.45277	2.51457	1.1633	NA
TR44878|c4_g4_i2	1.33674	1.67807	1.13415	unnamed protein product, partial
TR37456|c0_g2_i4	2.43296	1.37851	1.13415	NA
TR39886|c1_g5_i1	1.15433	1.47393	1.10329	PREDICTED: uncharacterized protein LOC105169034
TR35721|c2_g3_i3	1.02308	1	1.06376	hypothetical protein B456_009G367900
TR43322|c0_g4_i1	1.31526	1.19265	1.06376	hypothetical protein CICLE_v100306172mg, partial
TR38874|c0_g5_i1	1.13949	1.52725	1.02069	NA
TR2283|c0_g1_i1	1.12262	1.44057	1.01129	PREDICTED: cysteine-rich PDZ-binding protein isoform X1
TR3981|c0_g4_i4	-1.04993	-1.02647	-1.01716	hypothetical protein MIMGU_mgv1a013951mg
TR20436|c0_g1_i1	1.08363	-2.09954	-1.03578	AF448811_1unknown
TR30013|c0_g1_i2	-1.00666	-1.63743	-1.04315	PREDICTED: putative kinase-like protein TMKL1
TR37319|c1_g2_i10	-1.02528	-1.47805	-1.05172	NA
TR7409|c0_g1_i1	-1.3213	-1.30256	-1.05823	NA
TR43961|c1_g1_i1	-1.71388	-1.32193	-1.08824	PREDICTED: ankyrin repeat-containing protein At3g12360
TR36645|c2_g1_i1	-1.1062	-3.32193	-1.08824	PREDICTED: glucan endo-1,3-beta-glucosidase-like
TR34303|c1_g5_i2	-2.12531	-2.078	-1.0967	phi-1
TR34651|c1_g1_i4	-1.45565	-1.10434	-1.11458	PREDICTED: uncharacterized protein LOC105950646
TR43095|c2_g14_i2	-2.19931	1.14296	-1.12888	PREDICTED: dammarenediol II synthase-like
TR32534|c0_g1_i2	-1.31178	-1.03653	-1.12888	PREDICTED: phosphoenolpyruvate carboxykinase [ATP]-like
TR42500|c2_g1_i1	-1.19931	-1	-1.12888	PREDICTED: microtubule-associated protein 70-2
TR34695|c2_g5_i2	-2.52124	-1.09954	-1.14269	NA
TR4065|c0_g1_i3	-1.27731	-1.24793	-1.18417	PREDICTED: enhancer of mRNA-decapping protein 4-like
TR39567|c0_g1_i1	-1.174	-1.19082	-1.18656	PREDICTED: receptor protein kinase CLAVATA1
TR27861|c0_g1_i1	-1.7482	-2.30378	-1.19563	NA
TR35743|c2_g1_i2	1.15824	-1.19265	-1.2358	PREDICTED: uncharacterized protein LOC105169314
TR36120|c2_g1_i4	-1.42758	-2.45066	-1.2494	NA
TR41852|c1_g1_i1	-1.71388	-2	-1.25817	hypothetical protein MIMGU_mgv1a008728mg
TR33493|c1_g2_i5	-1.52124	-1.32193	-1.25817	NA
TR35274|c0_g2_i1	-1.29884	-1.09954	-1.25817	hypothetical protein MIMGU_mgv1a011873mg
TR25379|c0_g2_i1	-1.29884	-1.09954	-1.25817	PREDICTED: transcription factor LHW-like
TR42292|c1_g2_i2	-1.04731	-1.848	-1.29881	PREDICTED: probable serine/threonine-protein kinase DDB_G0282963 isoform X1
TR43314|c0_g1_i2	-1.04731	-1	-1.29881	PREDICTED: U-box domain-containing protein 14
TR30537|c1_g4_i5	-2.67736	-1.70044	-1.31475	NA
TR30986|c0_g1_i1	-1.19931	-1.62803	-1.32326	PREDICTED: 60S ribosomal protein L35-like
TR40162|c2_g1_i1	-2.00666	-1.48543	-1.42167	NA
TR39739|c0_g3_i1	-2.52124	-1.90689	-1.42809	PREDICTED: interactor of constitutive active ROPs 1-like
TR26009|c0_g2_i4	-1.13791	-1.71621	-1.4598	PREDICTED: cytochrome P450 86A7
TR27510|c0_g1_i1	-1.90713	-1.99022	-1.5212	hypothetical protein GLYMA_20G158700
TR35279|c0_g3_i1	-1.56188	-1	-1.5212	NA
TR43316|c1_g1_i4	-1.2697	-1.22239	-1.5212	hypothetical protein MIMGU_mgv1a001098mg
TR35271|c1_g2_i2	-1.06001	1.75971	-1.55317	SMLII
TR36915|c0_g1_i1	-1.13791	-1.06413	-1.65245	hypothetical protein MIMGU_mgv1a013767mg
TR40514|c0_g4_i1	-1.63227	-1.75489	-1.69113	hypothetical protein MIMGU_mgv1a013501mg
TR39837|c3_g4_i2	-2.19931	-2.22239	-1.74359	NA
TR18682|c0_g1_i1	-2.19931	-1.80735	-1.74359	PREDICTED: GDSL esterase/lipase At2g04570
TR40864|c0_g4_i1	-1.57277	-1.37346	-1.86224	PREDICTED: glycerol-3-phosphate 2-O-acyltransferase 6-like
TR43659|c2_g4_i1	-1.2437	-1.1375	-1.98063	PREDICTED: uncharacterized protein LOC105167832
TR30547|c0_g1_i2	-1.37775	-2.38949	-2.26763	PREDICTED: 14 kDa proline-rich protein DC2.15-like
TR36609|c3_g4_i1	-2.63671	1.10692	-1.25817	lipid transfer protein 2
TR7665|c0_g1_i2	-1.03884	1.52725	1.59101	PREDICTED: uncharacterized protein LOC105174263
TR7793|c1_g4_i4	-1.46234	1.64386	1.58732	PREDICTED: uncharacterized protein LOC105158789
TR39127|c1_g1_i4	-2.65874	1.99672	1.46728	NA
TR21800|c0_g1_i1	2.61661	-1.33703	1.42131	hypothetical protein MIMGU_mgv1a011266mg
TR42502|c1_g1_i4	1.70975	-3.31786	1.40673	PREDICTED: linoleate 13S-lipoxygenase 2-1, chloroplastic-like
TR40516|c0_g2_i1	1.44576	-1.19203	1.39304	stachyose synthase
TR42502|c1_g5_i1	1.87371	-2.96111	1.38253	PREDICTED: linoleate 13S-lipoxygenase 2-1, chloroplastic-like
TR40823|c0_g3_i2	-1.89445	1.01057	1.36	hypothetical protein SOVF_023890
TR23105|c1_g2_i3	-1.35131	1.43296	1.35654	alcohol acetyltransferase
TR26365|c0_g1_i2	1.79787	1.07146	1.35378	PREDICTED: ferredoxin-1, chloroplastic
TR36489|c0_g1_i2	1.92717	-1.02284	1.34742	cytochrome P450 CYP81Q43
TR36925|c0_g4_i2	-4.30365	-1.51937	1.34485	Q8OMT_MENPIRecName: Full=8-hydroxyquercetin 8-O-methyltransferase; AltName: Full=Flavonol 8-O-methyltransferase
TR3571|c1_g1_i2	1.28112	-1.17284	1.34318	PREDICTED: chitinase 6-like
TR39570|c0_g2_i4	-1.04731	1.94555	1.30887	hypothetical protein LR48_Vigan06g064900
TR40516|c0_g1_i2	1.49861	-1.80689	1.28842	PREDICTED: stachyose synthase
TR40516|c0_g1_i4	1.85579	-2.51307	1.26799	PREDICTED: stachyose synthase
TR25093|c1_g3_i1	4.13844	-1.5639	1.26632	glycine-rich protein 1
TR42502|c1_g3_i1	1.18905	-2.36009	1.26153	PREDICTED: linoleate 13S-lipoxygenase 2-1, chloroplastic-like
TR40433|c1_g1_i7	-2.79516	1.13454	1.21793	PREDICTED: protein NRT1/ PTR FAMILY 5.10-like
TR24798|c0_g2_i1	2.07111	-1.06609	1.20224	NA
TR42502|c1_g3_i3	1.60559	-2.43812	1.17129	hypothetical protein MIMGU_mgv1a000979mg
TR42502|c1_g5_i2	1.37039	-1.926	1.13776	PREDICTED: linoleate 13S-lipoxygenase 2-1, chloroplastic-like
TR43406|c1_g1_i1	2.33241	-1.25054	1.13515	PREDICTED: AMP deaminase-like isoform X2
TR42502|c1_g3_i8	1.56185	-3	1.12604	NA
TR42649|c2_g10_i2	-1.19206	1.08532	1.12004	PREDICTED: uncharacterized protein LOC105168700
TR28895|c0_g2_i1	-1.18116	1.92504	1.11753	alcohol acetyltransferase
TR2255|c10_g1_i1	-3.68657	2.05632	1.08655	lavandulyl diphsophate synthase
TR33118|c0_g1_i6	1.41921	-1.40939	1.05525	putative expansin
TR33640|c0_g1_i1	1.34666	-1.8365	1.03461	NA
TR33606|c1_g6_i2	-1.98939	1.17955	1.02857	NA
TR34870|c1_g1_i3	-1.1062	1.09311	1.01485	PREDICTED: uncharacterized protein LOC105168444
TR44738|c7_g1_i2	1.1792	2.11548	1.01485	hypothetical protein MIMGU_mgv1a000542mg
TR35998|c0_g1_i1	-1.78427	1.3356	-1.00663	unknown
TR38338|c0_g3_i2	1.09347	-1.8625	-1.01024	hypothetical protein MIMGU_mgv1a009538mg
TR20882|c0_g2_i1	-1.47942	1.4361	-1.0237	hypothetical protein MIMGU_mgv1a009380mg
TR42621|c0_g8_i1	-1.08383	1.29768	-1.06177	PREDICTED: subtilisin-like protease
TR32654|c0_g1_i1	-1.7468	1.88136	-1.42928	PREDICTED: protein ALUMINUM SENSITIVE 3
TR35271|c1_g2_i4	4.20895	-1.04891	-2.14269	SMLII

## Sheet: Transcript UP regulated
Transcript ID	log2FoldChange( OB_P1 Vs. AMPHID2 )	log2FoldChange( OK_P2 Vs. AMPHID2 )	log2FoldChange( F1 Vs. AMPHID2 )	Hit Description
TR26365|c0_g1_i2	1.79787	1.07146	1.35378	PREDICTED: ferredoxin-1, chloroplastic
TR44738|c7_g1_i2	1.1792	2.11548	1.01485	hypothetical protein MIMGU_mgv1a000542mg
TR35491|c1_g4_i1	1.08867	2.43172	2.67092	hypothetical protein MIMGU_mgv1a012489mg
TR33934|c1_g1_i3	2.27094	1.62722	2.43802	PREDICTED: probable xyloglucan endotransglucosylase/hydrolase protein 7
TR33934|c1_g1_i2	2.67894	1.11974	2.37268	hypothetical protein MIMGU_mgv1a011266mg
TR33934|c1_g1_i4	1.1319	1.13327	2.15396	PREDICTED: probable xyloglucan endotransglucosylase/hydrolase protein 7
TR38404|c0_g1_i2	1.77531	1.74366	2.09693	NA
TR44609|c8_g2_i1	3.26012	1.10692	2.06376	NA
TR32277|c1_g5_i1	1.55071	1.06413	1.64872	PREDICTED: auxin-induced protein AUX22-like
TR38404|c0_g1_i1	1.2434	1.24257	1.64193	cytochrome P450 CYP79D40
TR42745|c0_g2_i1	1.73929	1	1.56626	PREDICTED: uncharacterized protein LOC105165458
TR43836|c1_g1_i1	1.0808	1.36257	1.50433	PREDICTED: serine/threonine-protein phosphatase 6 regulatory subunit 3
TR25295|c0_g2_i1	1.1792	1.26303	1.49672	hypothetical protein MIMGU_mgv1a026173mg
TR32797|c2_g2_i3	1.47312	1.12928	1.49003	PREDICTED: probable S-adenosylmethionine-dependent methyltransferase At5g37990
TR30066|c0_g1_i5	1.11103	1.1635	1.4643	PREDICTED: cytokinin riboside 5'-monophosphate phosphoribohydrolase LOG3
TR38367|c0_g7_i3	1.38565	1.26303	1.44227	PREDICTED: uncharacterized protein LOC105176972
TR4050|c0_g1_i1	1.01081	1.15078	1.35355	PREDICTED: transcription factor bHLH35
TR44469|c1_g3_i1	1.52316	1.48543	1.32679	hypothetical protein MIMGU_mgv1a000390mg
TR44652|c0_g3_i3	1.30319	1.9386	1.28615	PREDICTED: plasma membrane ATPase 4-like
TR7963|c0_g1_i4	1.53766	1.22239	1.28615	PREDICTED: palmitoyl-protein thioesterase 1-like
TR32369|c0_g3_i1	1.28612	1.07039	1.20126	hypothetical protein VITISV_018472
TR32032|c1_g1_i6	1.19689	1.29999	1.18759	PREDICTED: glycine-rich cell wall structural protein 1.8-like
TR42086|c4_g4_i3	1.78492	1.35908	1.18405	PREDICTED: UPF0481 protein At3g47200-like
TR2636|c0_g2_i1	1.45277	2.51457	1.1633	NA
TR44878|c4_g4_i2	1.33674	1.67807	1.13415	unnamed protein product, partial
TR37456|c0_g2_i4	2.43296	1.37851	1.13415	NA
TR39886|c1_g5_i1	1.15433	1.47393	1.10329	PREDICTED: uncharacterized protein LOC105169034
TR35721|c2_g3_i3	1.02308	1	1.06376	hypothetical protein B456_009G367900
TR43322|c0_g4_i1	1.31526	1.19265	1.06376	hypothetical protein CICLE_v100306172mg, partial
TR38874|c0_g5_i1	1.13949	1.52725	1.02069	NA
TR2283|c0_g1_i1	1.12262	1.44057	1.01129	PREDICTED: cysteine-rich PDZ-binding protein isoform X1

## Sheet: Transcript Down regulated
Transcript ID	log2FoldChange( OB_P1 Vs. AMPHID2 )	log2FoldChange( OK_P2 Vs. AMPHID2 )	log2FoldChange( F1 Vs. AMPHID2 )	Hit Description
TR3981|c0_g4_i4	-1.04993	-1.02647	-1.01716	hypothetical protein MIMGU_mgv1a013951mg
TR20436|c0_g1_i1	1.08363	-2.09954	-1.03578	AF448811_1unknown
TR30013|c0_g1_i2	-1.00666	-1.63743	-1.04315	PREDICTED: putative kinase-like protein TMKL1
TR37319|c1_g2_i10	-1.02528	-1.47805	-1.05172	NA
TR7409|c0_g1_i1	-1.3213	-1.30256	-1.05823	NA
TR43961|c1_g1_i1	-1.71388	-1.32193	-1.08824	PREDICTED: ankyrin repeat-containing protein At3g12360
TR36645|c2_g1_i1	-1.1062	-3.32193	-1.08824	PREDICTED: glucan endo-1,3-beta-glucosidase-like
TR34303|c1_g5_i2	-2.12531	-2.078	-1.0967	phi-1
TR34651|c1_g1_i4	-1.45565	-1.10434	-1.11458	PREDICTED: uncharacterized protein LOC105950646
TR43095|c2_g14_i2	-2.19931	1.14296	-1.12888	PREDICTED: dammarenediol II synthase-like
TR32534|c0_g1_i2	-1.31178	-1.03653	-1.12888	PREDICTED: phosphoenolpyruvate carboxykinase [ATP]-like
TR42500|c2_g1_i1	-1.19931	-1	-1.12888	PREDICTED: microtubule-associated protein 70-2
TR34695|c2_g5_i2	-2.52124	-1.09954	-1.14269	NA
TR4065|c0_g1_i3	-1.27731	-1.24793	-1.18417	PREDICTED: enhancer of mRNA-decapping protein 4-like
TR39567|c0_g1_i1	-1.174	-1.19082	-1.18656	PREDICTED: receptor protein kinase CLAVATA1
TR27861|c0_g1_i1	-1.7482	-2.30378	-1.19563	NA
TR35743|c2_g1_i2	1.15824	-1.19265	-1.2358	PREDICTED: uncharacterized protein LOC105169314
TR36120|c2_g1_i4	-1.42758	-2.45066	-1.2494	NA
TR41852|c1_g1_i1	-1.71388	-2	-1.25817	hypothetical protein MIMGU_mgv1a008728mg
TR33493|c1_g2_i5	-1.52124	-1.32193	-1.25817	NA
TR35274|c0_g2_i1	-1.29884	-1.09954	-1.25817	hypothetical protein MIMGU_mgv1a011873mg
TR25379|c0_g2_i1	-1.29884	-1.09954	-1.25817	PREDICTED: transcription factor LHW-like
TR42292|c1_g2_i2	-1.04731	-1.848	-1.29881	PREDICTED: probable serine/threonine-protein kinase DDB_G0282963 isoform X1
TR43314|c0_g1_i2	-1.04731	-1	-1.29881	PREDICTED: U-box domain-containing protein 14
TR30537|c1_g4_i5	-2.67736	-1.70044	-1.31475	NA
TR30986|c0_g1_i1	-1.19931	-1.62803	-1.32326	PREDICTED: 60S ribosomal protein L35-like
TR40162|c2_g1_i1	-2.00666	-1.48543	-1.42167	NA
TR39739|c0_g3_i1	-2.52124	-1.90689	-1.42809	PREDICTED: interactor of constitutive active ROPs 1-like
TR26009|c0_g2_i4	-1.13791	-1.71621	-1.4598	PREDICTED: cytochrome P450 86A7
TR27510|c0_g1_i1	-1.90713	-1.99022	-1.5212	hypothetical protein GLYMA_20G158700
TR35279|c0_g3_i1	-1.56188	-1	-1.5212	NA
TR43316|c1_g1_i4	-1.2697	-1.22239	-1.5212	hypothetical protein MIMGU_mgv1a001098mg
TR35271|c1_g2_i2	-1.06001	1.75971	-1.55317	SMLII
TR36915|c0_g1_i1	-1.13791	-1.06413	-1.65245	hypothetical protein MIMGU_mgv1a013767mg
TR40514|c0_g4_i1	-1.63227	-1.75489	-1.69113	hypothetical protein MIMGU_mgv1a013501mg
TR39837|c3_g4_i2	-2.19931	-2.22239	-1.74359	NA
TR18682|c0_g1_i1	-2.19931	-1.80735	-1.74359	PREDICTED: GDSL esterase/lipase At2g04570
TR40864|c0_g4_i1	-1.57277	-1.37346	-1.86224	PREDICTED: glycerol-3-phosphate 2-O-acyltransferase 6-like
TR43659|c2_g4_i1	-1.2437	-1.1375	-1.98063	PREDICTED: uncharacterized protein LOC105167832
TR30547|c0_g1_i2	-1.37775	-2.38949	-2.26763	PREDICTED: 14 kDa proline-rich protein DC2.15-like
