# Supplementary material for: Altered Developmental and Metabolic Gene Expression in Basil Interspecific Hybrids
Source: Plants (Basel). 2022 Jul 18;11(14):1873. doi: 10.3390/plants11141873 (PMC9321874; doi:10.3390/plants11141873)
Supplement: Supplementary file 1 [file plants-11-01873-s001.zip › Table S4_Transcripts related to general phenylpropanoid biosynthetic pathway.xlsx]

## Sheet: Sheet1
Pathway	Gene	Enzyme	KO ID (E.C.no)
				OBP1	OKP2	F1	AMPHID2
Phenylpropanoid/Lignin biosynthesis	HCT	Hydroxycinnamoyl transferase	K13065	14	15	10	15
			(2.3.1.133)
	PAL	Phenylalanine ammonia-lyase	K10775 (4.3.1.24)	19	21	19	20
	C4H	Cinnamate 4-hydroxylase	K14974 (1.14.13.11)	4	6	5	4
	CCR	Cinnamoyl-CoA reductase	K09753 (1.2.1.44)	39	33	44	41
	4CL	4-Coumarate: coenzyme A ligase	K01904	39	43	43	41
			(6.2.1.12)
	COMT	Caffeic acid 3-O-methyltransferase	K13066 (2.1.1.68)	7	4	5	5
	CCoAOMT	Caffeoyl CoA O-methyltransferase	K00588 (2.1.1.104)	4	7	2	6
	CAD	Cinnamyl alcohol dehydrogenase	K00083	9	14	12	9
			(1.1.1.195)
	EOMT	Eugenol O-methyltransferase	K17058 (2.1.1.146)	1	_	1	1
	EGS	Eugenol synthase 1	K17055 (1.1.1.318)	2	1	3	3
Flavonoid Biosynthesis	CHS	Chalcone synthase	K00660 (2.3.1.74)	3	9	6	7
	CHI	Chalcone Isomerase	K01859 (5.5.1.6)	3	6	6	7
	DFR	Dihydroflavone reductase	1.1.1.219	11	13	14	15
	F3'H	Flavonoid 3'-monooxygenase	K05280 (1.14.14.82)	9	6	8	7
	F3'5'H	Flavonoid 3'5' hydroxylase	K13083 (1.14.14.81)	2	1	1	1
	F3H	Flavonol synthase/flavanone 3-hydroxylase	K05278 (1.14.20.6)	2	1	1	1
Anthocyanin modification	UF3GT	Flavonoid 3-O-glucosyltransferase	K10757 (2.4.1.91)	4	2	4	4
	UGT75C1	Anthocyanidin 3-O-glucoside 5-O-glucosyltransferase	K12338 (2.4.1.298)	2	2	1	1
	5MaT1	anthocyanin 5-O-glucoside-6'''-O-malonyltransferase	K12934 (2.3.1.172)	8	5	4	3
