# Supplementary material for: Altered Developmental and Metabolic Gene Expression in Basil Interspecific Hybrids
Source: Plants (Basel). 2022 Jul 18;11(14):1873. doi: 10.3390/plants11141873 (PMC9321874; doi:10.3390/plants11141873)
Supplement: Supplementary file 1 [file plants-11-01873-s001.zip › Table S5_Transcripts related to chlorophyll metabolism.xlsx]

## Sheet: Sheet1
Function	Gene	Enzyme	KO ID	OBP1	OKP2	F1	AMPHID2
			(EC No.)
ALA formation	HemA	Glutamyl-tRNA reductase	K02492 (1.2.1.70)	10	12
						12	12
	HemL	Glutamate-1-semialdehyde 2,1-aminomutase	K01845	1	2
			(5.4.3.8)			1	1
Proto IX formation	HemB	Porphobilinogen synthase	K01698 (4.2.1.24)	5	4
						4	5
	HemC	Hydroxymethylbilane synthase	K01749 (2.5.1.61)	5	4
						5	5
	HemD	Uroporphyrinogen-III synthase	K01719 (4.2.1.75)	2	3
						2	3
	HemE	Uroporphyrinogen decarboxylase	K01599 (4.1.1.37)	11	9	10	9
	HemF	Coproporphyrinogen-III oxidase	K02495 (1.3.99.22)	5	5	5	5
	HemY	Protoporphyrinogen oxidase	K00231	8	9
			(1.3.3.4)			10	11
Heme formation	HemH	Ferrochelatase	K01772 (4.99.1.1)	11	12
						14	13
	COX10	Protoheme IX farnesyltransferase	K02257	3	4
			(2.5.1.-)			4	4
	COX15	Cytochrome c oxidase assembly protein subunit 15	K02259	5	5
			(1.9.3.1)
						7	8
Chlorophyll formation	ChlH	Magnesium chelatase subunit H	K03403	1	1
			(6.6.1.1)			1	1
	ChlD	Magnesium chelatase subunit D	K03404	2	2
			(6.6.1.1)			2	2
	ChlI	Magnesium chelatase subunit I	K03405	4	3
			(6.6.1.1)			3	5
	ChlM	Magnesium protoporphyrin IX methyltransferase	K03428 (2.1.1.11)	4	5
						5	5
	ChlE	Magnesium-protoporphyrin IX monomethyl ester (oxidative) cyclase	K04035 (1.14.13.81)	4	4
						4	4
	4VCR	Divinyl chlorophyllide a 8-vinyl-reductase	K19073 (1.3.1.75)	5	6
						6	6
	POR	Protochlorophyllide reductase	K00218 (1.3.1.33)	6	5
						7	7
	CAO	Chlorophyllide a oxygenase	K13600 (1.14.13.122)	8	9
						9	7
	ChlG	Chlorophyll synthase	K04040 (2.5.1.62)	1	1
						1	1
	CLH	Chlorophyllase	K08099 (3.1.1.14)	5	8
						9	8
Chlorophyll degradation	NYC1	Chlorophyll (ide) b reductase	K13606 (1.1.1.294)	2	2	2	2
	HCAR	7-Hydroxymethyl chlorophyll a reductase	K18010 (1.17.7.2)	5	5
						5	5
	PPH	Pheophytinase	K08099	22	26
			(3.1.1.14)			32	33
	PAO	Pheophorbide a oxygenase	K13071 (1.14.15.17)	3	3
						3	3
	RCCR	Red chlorophyll catabolite reductase	K13545 (1.3.7.12)	3	3
						4	4
