# Supplementary material for: Altered Developmental and Metabolic Gene Expression in Basil Interspecific Hybrids
Source: Plants (Basel). 2022 Jul 18;11(14):1873. doi: 10.3390/plants11141873 (PMC9321874; doi:10.3390/plants11141873)
Supplement: Supplementary file 1 [file plants-11-01873-s001.zip › Table S6_Transcripts related to stomatal patterning and development genes.xlsx]

## Sheet: Sheet1
Hit Description	OBP1	OKP2	F1	AMPHID2
PREDICTED: mitogen-activated protein kinase 7-like	2	2	3	3
PREDICTED: EPIDERMAL PATTERNING FACTOR-like protein 5	1	2	_	1
PREDICTED: mitogen-activated protein kinase kinase kinase NPK1-like	3	10	6	5
PREDICTED: mitogen-activated protein kinase 3	2	2	3	2
PREDICTED: mitogen-activated protein kinase 19 isoform X1	12	10	12	12
PREDICTED: mitogen-activated protein kinase homolog NTF3	3	3	3	3
PREDICTED: mitogen-activated protein kinase kinase 3	1	1	1	1
PREDICTED: mitogen-activated protein kinase kinase kinase 1-like	10	7	9	7
mitogen-activated protein kinase 16, partial	3	3	5	5
PREDICTED: mitogen-activated protein kinase kinase 5	3	2	3	1
PREDICTED: mitogen-activated protein kinase 15-like	5	9	9	10
mitogen-activated protein kinase 4	1	1	1	1
PREDICTED: LOW QUALITY PROTEIN: mitogen-activated protein kinase kinase kinase YODA	16	17	18	17
PREDICTED: EPIDERMAL PATTERNING FACTOR-like protein 9	1	2	2	2
PREDICTED: EPIDERMAL PATTERNING FACTOR-like protein 2	2	1	_	_
PREDICTED: LOW QUALITY PROTEIN: mitogen-activated protein kinase homolog MMK1-like	2	2	2	2
Stomagen	1	_	1	_
PREDICTED: mitogen-activated protein kinase kinase kinase 2-like	14	10	13	13
PREDICTED: mitogen-activated protein kinase kinase 9-like	2	3	3	3
PREDICTED: mitogen-activated protein kinase kinase kinase 3-like	1	1	_	_
PREDICTED: mitogen-activated protein kinase homolog MMK2/MMK2-like	5	8	7	10
PREDICTED: mitogen-activated protein kinase homolog NTF4-like	1	1	1	1
PREDICTED: mitogen-activated protein kinase 20-like	8	7	10	10
PREDICTED: mitogen-activated protein kinase kinase 2	6	6	8	6
PREDICTED: mitogen-activated protein kinase 2-like	1	1	1	1
Mitogen-activated protein kinase 10 /10-like	4	7	6	6
PREDICTED: mitogen-activated protein kinase 9 isoform X2	15	15	14	15
PREDICTED: LOW QUALITY PROTEIN: LRR receptor-like serine/threonine-protein kinase ERECTA	3	6	7	7
PREDICTED: subtilisin-like protease SDD1	18	3	14	15
PREDICTED: leucine-rich repeat receptor-like protein CLAVATA2	6	1	4	4
PREDICTED: receptor protein kinase CLAVATA1/CLAVATA1-like	11	18	15	16
PREDICTED: CLAVATA3/ESR (CLE)-related protein TDIF	2	1	1	3
PREDICTED: EPIDERMAL PATTERNING FACTOR-like protein 4	2	2	2	2
protein TOO MANY MOUTHS	_	2	1	2
PREDICTED: mitogen-activated protein kinase kinase 6	_	1	2	1
mitogen-activated protein kinase homolog NTF6		2		1
mitogen activated protein kinase kinase 1	1	2	2	2
