# Supplementary material for: Altered Developmental and Metabolic Gene Expression in Basil Interspecific Hybrids
Source: Plants (Basel). 2022 Jul 18;11(14):1873. doi: 10.3390/plants11141873 (PMC9321874; doi:10.3390/plants11141873)
Supplement: Supplementary file 1 [file plants-11-01873-s001.zip › Table S7_transcription factor no..xlsx]

## Sheet: Sheet1
Transcription Factors	OBP1	OKP2	F1	Amphid2
basic helix-loop-helix transcription factor	131	153	156	160
bHLH1 protein	2	_	1	2
bHLH3/bHLH3-like	5	6	6	6
bHLH104	3	3	5	4
bHLH110	1	5	1	2
bHLH112-like	1	2	1	1
bHLH113 isoform X1	1	1	2	3
bHLH121	1	1	1	1
bHLH125	1	1	1	1
bHLH130-like	8	6	9	9
bHLH137 isoform	_	1	1	_
bHLH139-like	_	1	1	1
bHLH13-like	1	3	3	3
bHLH140	2	3	1	2
bHLH143 /bHLH143-like	20	22	25	25
bHLH144-like	4	5	6	8
bHLH148-like	6	6	8	8
bHLH149-like	_	_	1	_
bHLH150	2	1	2	2
bHLH30	3	3	2	3
bHLH35	2	1	2	2
bHLH3-like	1	2	2	2
bHLH47	2	2	2	1
bHLH48-like	2	5	4	5
bHLH49/bHLH49-like	5	5	5	5
bHLH51	2	1	1	5
bHLH60-like	1	1	1	1
bHLH61-like	_	1	1	1
bHLH66-like	_	2	1	1
bHLH68/bHLH68-like	6	13	12	12
bHLH71	1	1	1	1
bHLH78-like	_	1	1	1
bHLH79-like	_	1	1	1
bHLH80	1	2	2	2
bHLH96	_	1	_	1
3R MYB protein	1	3	3	3
GAMYB-binding protein, partial	_	1	1	1
Myb domain protein 73, putative	1		1	1
MYB homologue, partial	1	1	1	1
Myb transcription factor	4	4	5	5
Myb/SANT-like DNA-binding domain protein	1		1	1
MYB1, partial	2	2	2	2
MYB10, partial	4	1	3	3
MYB13, partial	1	_	1	1
MYB14, partial	1	2	2	1
MYB18, partial	2	1	2	2
MYB2	1	2	1	1
MYB4	2	_	1	1
MYB5	2	2	3	2
MYBJ2	1	_	_	_
MYBR domain class transcription factor	1	2	2	2
MYB-related protein	56	81	65	74
PREDICTED: myb family transcription factor APL isoform X1 /APL-like	21	20	24	24
PREDICTED: myb-binding protein 1A-like protein	4	4	4	4
PREDICTED: myb-like protein K	4	2	3	3
PREDICTED: myb-like protein P	_	1	_	_
PREDICTED: myb-like protein Q	_	1	_	_
PREDICTED: myb-like protein U	1	1	1	1
PREDICTED: myb-like protein X /X-like	6	6	7	7
PREDICTED: MYB-like transcription factor ETC3	8	2	4	2
PREDICTED: myb-related protein 306-like	3	3	3	2
PREDICTED: myb-related protein 308-like	_	1	1	3
PREDICTED: myb-related protein 315-like	1	2	2	1
PREDICTED: myb-related protein 330		1	1	2
PREDICTED: myb-related protein 3R-1 /3R-1-like	9	10	12	9
PREDICTED: myb-related protein Myb4-like	2	2	2	1
PREDICTED: target of Myb protein 1	3	3	3	3
PREDICTED: transcription factor MYB108-like	1	2	1	_
PREDICTED: transcription factor MYB1R1 /MYB1R1-like	12	11	14	14
PREDICTED: transcription factor MYB28-like	1	1	1	_
PREDICTED: transcription factor MYB3-like	2	3	2	3
PREDICTED: transcription factor MYB44-like	3	5	4	3
PREDICTED: transcription factor MYB48	4	1	2	2
PREDICTED: transcription factor MYB86-like	_	4	1	3
PREDICTED: transcription repressor MYB5-like	_	5	5	5
R2R3-MYB protein	7	10	8	10
PREDICTED: putative NAC domain-containing protein 94	4	2	1	1
PREDICTED: NAC transcription factor 29/29-like	7	4	6	7
PREDICTED: NAC transcription factor 25 isoform X1	4	5	4	4
PREDICTED: NAC domain-containing protein 89-like	_	_	1	_
PREDICTED: NAC domain-containing protein 86-like	1	1	1	_
PREDICTED: NAC domain-containing protein 78/78-like	14	18	16	18
PREDICTED: NAC domain-containing protein 72-like	8	3	6	6
PREDICTED: NAC domain-containing protein 7/7-like	1	3	1	2
PREDICTED: NAC domain-containing protein 4-like	1	1	1	1
PREDICTED: NAC domain-containing protein 45	4	4	4	4
PREDICTED: NAC domain-containing protein 2/2-like	8	5	8	7
PREDICTED: NAC domain-containing protein 100-like	4	3	4	3
NAC transcription factors 10	3	1	1	1
NAC transcription factor 1	8	11	11	9
NAC domain-containing protein	2	1	1	2
NAC domain protein, partial	1	_	1	_
NAC domain-containing protein 8/8-like	3	7	4	8
PREDICTED: NAC transcription factor ONAC010-like	_	2	_	2
PREDICTED: NAC domain-containing protein 90	1	_	_	_
PREDICTED: NAC domain-containing protein 37-like	1	1	_	_
CONSTANS-like protein 9/LIKE 9	14	23	24	25
PREDICTED: LOW QUALITY PROTEIN: zinc finger protein CONSTANS-LIKE 14-like	8	8	11	12
PREDICTED: zinc finger protein CONSTANS-LIKE 10-like	4	5	5	5
PREDICTED: zinc finger protein CONSTANS-LIKE 13	4	4	4	4
PREDICTED: zinc finger protein CONSTANS-LIKE 16	5	6	7	7
PREDICTED: zinc finger protein CONSTANS-LIKE 4-like	2	3	3	3
PREDICTED: zinc finger protein CONSTANS-LIKE 5-like	6	5	5	3
PREDICTED: zinc finger protein CONSTANS-LIKE6/ 6-like isoform X2	2	_	_	1
zinc finger protein CONSTANS-LIKE 3	2	2	2	2
zinc finger protein CONSTANS-LIKE 7	3	3	3	3
PREDICTED: LOW QUALITY PROTEIN: probable WRKY transcription factor 33	2	1	3	1
PREDICTED: LOW QUALITY PROTEIN: probable WRKY transcription factor 70	6	1	8	8
PREDICTED: probable WRKY transcription factor 11	6	5	7	7
PREDICTED: probable WRKY transcription factor 13	3	4	4	3
PREDICTED: probable WRKY transcription factor 17	6	9	10	10
PREDICTED: probable WRKY transcription factor 2/2-like	2	7	6	6
PREDICTED: probable WRKY transcription factor 20	5	5	5	5
PREDICTED: probable WRKY transcription factor 21	1	5	1	1
PREDICTED: probable WRKY transcription factor 23	3	1	2	3
PREDICTED: probable WRKY transcription factor 3	5	5	4	5
PREDICTED: probable WRKY transcription factor 31	2	2	1	1
PREDICTED: probable WRKY transcription factor 32	2	2	2	2
PREDICTED: probable WRKY transcription factor 35	1	1	1	1
PREDICTED: probable WRKY transcription factor 4	9	10	9	10
PREDICTED: probable WRKY transcription factor 40	12	4	11	9
PREDICTED: probable WRKY transcription factor 41	5	2	4	3
PREDICTED: probable WRKY transcription factor 50	2	1	1	1
PREDICTED: probable WRKY transcription factor 53	9	3	4	2
PREDICTED: probable WRKY transcription factor 57 isoform X2	_	1	_	_
PREDICTED: probable WRKY transcription factor 65	8	1	2	2
PREDICTED: probable WRKY transcription factor 69 isoform X2	4	1	1	_
PREDICTED: probable WRKY transcription factor 7	12	11	6	6
PREDICTED: probable WRKY transcription factor 70	6	5	8	7
PREDICTED: probable WRKY transcription factor 75	1	1	_	1
PREDICTED: WRKY transcription factor 1-like	10	15	10	12
PREDICTED: WRKY transcription factor 22	4	3	3	2
PREDICTED: WRKY transcription factor 44-like	3	6	6	6
PREDICTED: WRKY transcription factor 6	3	2	2	3
WRKY transcription factor	3	4	_	2
WRKY transcription factor 2-6	_	1	_	_
PREDICTED: WRKY transcription factor 18-like	1	_	_	_
PREDICTED: probable WRKY transcription factor 51	1	_	1	_
PREDICTED: probable WRKY transcription factor 49	1	_	_	1
PREDICTED: probable WRKY transcription factor 48	1	_	_	_
PREDICTED: probable WRKY transcription factor 35	1	1	1	1
PREDICTED: probable WRKY transcription factor 30	1	_	_	_
PREDICTED: probable WRKY transcription factor 29 isoform X1	1	_	_	1
PREDICTED: probable WRKY transcription factor 26	1	_	1	1
PREDICTED: probable WRKY transcription factor 21 isoform X1	1	_	_	_
PREDICTED: probable WRKY transcription factor 2	1	_	_	_
PREDICTED: axial regulator YABBY 1	1	2	2	2
PREDICTED: axial regulator YABBY 5	8	10	8	11
PREDICTED: putative axial regulator YABBY 2	8	14	15	14
YABBY-like transcription factor GRAMINIFOLIA	1	1	1	1
YABBY-like transcription factor PROLONGATA	1	1	_	_
auxin response factor	3	2	2	2
auxin response factor 6a/6-like isoform X2	25	20	21	22
auxin response factor 8	3	3	2	3
PREDICTED: auxin response factor 17 isoform X1	1	1	1	1
PREDICTED: auxin response factor 18-like	15	24	25	23
PREDICTED: auxin response factor 19	14	10	10	12
PREDICTED: auxin response factor 1-like	8	9	9	9
PREDICTED: auxin response factor 2/2-like	13	18	19	19
PREDICTED: auxin response factor 22-like isoform X3	6	5	6	6
PREDICTED: auxin response factor 3	4	7	6	7
PREDICTED: auxin response factor 4 isoform X2	10	16	17	17
PREDICTED: auxin response factor 5	3	5	5	5
PREDICTED: auxin response factor 8-like	8	8	8	8
PREDICTED: auxin response factor 9	8	14	14	15
AF406699_1BEL1-related homeotic protein 13	1	1	1	1
PREDICTED: BEL1-like homeodomain protein 1	16	16	20	20
PREDICTED: BEL1-like homeodomain protein 4	18	17	20	18
PREDICTED: BEL1-like homeodomain protein 7	7	7	7	7
PREDICTED: BEL1-like homeodomain protein 9 isoform X1	4	7	7	8
PREDICTED: homeobox protein BEL1 homolog	9	9	10	10
PREDICTED: GATA transcription factor 11-like	9	9	12	12
PREDICTED: GATA transcription factor 12-like	2	8	3	3
PREDICTED: GATA transcription factor 15-like	6	10	8	10
PREDICTED: GATA transcription factor 1/1-like isoform X1	3	1	4	5
PREDICTED: GATA transcription factor 24-like isoform X2	3	3	3	3
PREDICTED: GATA transcription factor 26 / 26-like	7	7	8	7
PREDICTED: GATA transcription factor 28	9	8	9	9
PREDICTED: GATA transcription factor 5-like	10	9	10	8
PREDICTED: GATA transcription factor 8	9	11	11	11
PREDICTED: GATA transcription factor 9-like	_	1	_	1
PREDICTED: putative GATA transcription factor 22	4	_	4	5
PREDICTED: GATA transcription factor 27-like isoform X1	1	5	_	_
PREDICTED: GATA transcription factor 18-like	_	2	_	_
PREDICTED: GATA zinc finger domain-containing protein 7-like	_	1	_	_
ethylene-responsive-element-binding factor 9		1	1	1
PREDICTED: AP2-like ethylene-responsive transcription factor AIL6 isoform X1	2	_	1	2
PREDICTED: AP2-like ethylene-responsive transcription factor ANT isoform X2	2	2	2	3
PREDICTED: ethylene-responsive transcription factor 12	2	4	4	3
PREDICTED: ethylene-responsive transcription factor 1A-like /1B-like	5	1	1	2
PREDICTED: ethylene-responsive transcription factor 3-like	2	3	3	3
PREDICTED: ethylene-responsive transcription factor 4-like	6	9	11	12
PREDICTED: ethylene-responsive transcription factor 5-like	4	2	4	4
PREDICTED: ethylene-responsive transcription factor ERF003-like	1	2	2	1
PREDICTED: ethylene-responsive transcription factor ERF008-like	4	2	4	5
PREDICTED: ethylene-responsive transcription factor ERF017-like	4	6	6	6
PREDICTED: ethylene-responsive transcription factor ERF034	1	4	1	2
PREDICTED: ethylene-responsive transcription factor ERF039-like	2	1	2	2
PREDICTED: ethylene-responsive transcription factor ERF060	1	1	1	1
PREDICTED: ethylene-responsive transcription factor ERF062	4	4	4	5
PREDICTED: ethylene-responsive transcription factor ERF069-like	3	4	6	5
PREDICTED: ethylene-responsive transcription factor ERF107-like	1	_	1	1
PREDICTED: ethylene-responsive transcription factor ERF109-like	2	1	4	4
PREDICTED: ethylene-responsive transcription factor ERF118-like	6	12	12	12
PREDICTED: ethylene-responsive transcription factor RAP2-12-like	7	9	9	9
PREDICTED: ethylene-responsive transcription factor RAP2-13	1	_	1	1
PREDICTED: ethylene-responsive transcription factor RAP2-4	5	6	6	6
PREDICTED: ethylene-responsive transcription factor RAP2-7	4	18	4	6
PREDICTED: ethylene-responsive transcription factor TINY-like	3	5	1	4
PREDICTED: ethylene-responsive transcription factor WIN1-like	3	1	1	3
PREDICTED: ethylene-responsive transcription factor-like protein At4g13040 isoform X1	4	4	5	5
PREDICTED: LOW QUALITY PROTEIN: ethylene-responsive transcription factor 2-like	_	1	1	2
PREDICTED: LOW QUALITY PROTEIN: ethylene-responsive transcription factor ERF061	2	_	1	1
putative ethylene-responsive element binding protein	2	3	4	4
PREDICTED: AP2-like ethylene-responsive transcription factor At1g16060	_	_	2	_
PREDICTED: ethylene-responsive transcription factor ERF054-like	2	_	_	_
PREDICTED: AP2-like ethylene-responsive transcription factor At2g41710 isoform X1	_	1	_	_
PREDICTED: ethylene-responsive transcription factor 13-like	_	2	_	_
PREDICTED: ethylene-responsive transcription factor ERF054-like	_	1	_	_
PREDICTED: ethylene-responsive transcription factor ERF113 isoform X2	_	1	_	_
PREDICTED: ethylene-responsive transcription factor ESR2-like	_	1	_	_
PREDICTED: ethylene-responsive transcription factor RAP2-13	_	1	_	_
bZIP transcription factor family protein 11	1	2	1	1
PREDICTED: bZIP transcription factor 60	4	5	6	6
PREDICTED: bZIP transcription factor TRAB1	2	2	2	2
PREDICTED: dof zinc finger protein DOF1.1-like	1	2	2	2
PREDICTED: dof zinc finger protein DOF1.2	2	_	2	2
PREDICTED: dof zinc finger protein DOF1.4-like	3	3	3	3
PREDICTED: dof zinc finger protein DOF1.5-like	_	1	1	1
PREDICTED: dof zinc finger protein DOF2.1	_	2	1	1
PREDICTED: dof zinc finger protein DOF3.1-like	4	2	2	2
PREDICTED: dof zinc finger protein DOF3.7-like	2	_	3	2
PREDICTED: dof zinc finger protein DOF4.6	3	5	5	7
PREDICTED: dof zinc finger protein DOF5.1	10	13	9	11
PREDICTED: dof zinc finger protein DOF5.4-like	1	1	1	1
PREDICTED: dof zinc finger protein DOF5.6 isoform X1	1	3	2	3
PREDICTED: dof zinc finger protein DOF5.7-like	1	_	_	_
PREDICTED: dof zinc finger protein/ DOF3.4-like	_	2	_	_
euFUL FRUITFULL-like MADS-box	_	2	2	1
MADS box protein	1	2	3	3
MADS-box protein AGL2 subfamily	_	2	2	2
PREDICTED: agamous-like MADS-box protein AGL21 isoform X3	3	2	3	2
PREDICTED: agamous-like MADS-box protein AGL27	1	_	4	4
PREDICTED: agamous-like MADS-box protein AGL8 homolog	1	_	1	1
PREDICTED: agamous-like MADS-box protein AGL9 homolog	_	_	1	1
PREDICTED: MADS-box protein JOINTLESS	2	2	4	3
PREDICTED: MADS-box protein SOC1	8	9	14	10
PREDICTED: MADS-box protein SVP-like	7	6	7	7
PREDICTED: MADS-box transcription factor 23	6	1	5	7
PREDICTED: MADS-box transcription factor 25 isoform X2	_	1	1	1
PREDICTED: MADS-box transcription factor 7-like isoform X3	_	1	1	1
RIN-like MADS-box protein	1	1	1	1
PREDICTED: agamous-like MADS-box protein AGL12 isoform X1	1	1	_	_
PREDICTED: agamous-like MADS-box protein AGL8 homolog	1	1	_	_
PREDICTED: agamous-like MADS-box protein AGL27	1	4	_	_
PREDICTED: agamous-like MADS-box protein AGL19	2	_	_	_
PREDICTED: agamous-like MADS-box protein AGL12 isoform X1	1	_	_	_
PREDICTED: trihelix transcription factor ASIL1-like	10	11	10	11
PREDICTED: trihelix transcription factor ASIL2	13	17	18	18
PREDICTED: trihelix transcription factor GT-2-like	14	11	16	14
PREDICTED: trihelix transcription factor GT-4-like	4	5	4	4
PREDICTED: trihelix transcription factor GTL1 isoform X2	_	2	1	1
PREDICTED: trihelix transcription factor GTL2	1	2	2	2
PREDICTED: trihelix transcription factor PTL	_	1	_	_
PREDICTED: trihelix transcription factor GT-3b /3b-like	_	2	_	_
ELLA domain GRAS family transcription factor	2	1	2	2
GRAS family transcription factor isoform 1	1	_	_	_
APETALA 1	1	4	3	1
PREDICTED: floral homeotic protein APETALA 2-like/ isoform X1	8	7	8	8
PREDICTED: BES1/BZR1 homolog protein 2-like	1	2	2	2
PREDICTED: BES1/BZR1 homolog protein 4/4-like	5	17	13	17
PREDICTED: AP2/ERF and B3 domain-containing transcription factor RAV1-like	9	6	8	7
AP10/EREBP Transcription Factors	9	2	5	6
AP12/EREBP Transcription Factors	2	7	6	7
AP2/EREBP Transcription Factors	2	4	4	3
AP4/EREBP Transcription Factors	2	4	3	4
AP9/EREBP Transcription Factors	2	2	1	1
AP5/EREBP Transcription Factors	1	1	1	_
AP8/EREBP Transcription Factors, partial	_	1	_	_
PREDICTED: zinc finger CCCH domain-containing protein 1	1	1	1	2
PREDICTED: zinc finger CCCH domain-containing protein 11-like	2	3	2	2
PREDICTED: zinc finger CCCH domain-containing protein 12 isoform X2	3	3	3	3
PREDICTED: zinc finger CCCH domain-containing protein 13	8	9	8	9
PREDICTED: zinc finger CCCH domain-containing protein 14-like	12	14	14	14
PREDICTED: zinc finger CCCH domain-containing protein 15	2	3	2	2
PREDICTED: zinc finger CCCH domain-containing protein 17 isoform X1	2	4	3	3
PREDICTED: zinc finger CCCH domain-containing protein 18	10	19	18	13
PREDICTED: zinc finger CCCH domain-containing protein 19	6	6	4	6
PREDICTED: zinc finger CCCH domain-containing protein 20	8	17	7	17
PREDICTED: zinc finger CCCH domain-containing protein 21	1	1	1	1
PREDICTED: zinc finger CCCH domain-containing protein 22-like	2	11	9	10
PREDICTED: zinc finger CCCH domain-containing protein 23	4	7	5	7
PREDICTED: zinc finger CCCH domain-containing protein 24	2	2	2	2
PREDICTED: zinc finger CCCH domain-containing protein 25-like	3	3	3	3
PREDICTED: zinc finger CCCH domain-containing protein 29	22	23	29	28
PREDICTED: zinc finger CCCH domain-containing protein 3 isoform X1	1	1		1
PREDICTED: zinc finger CCCH domain-containing protein 30-like	9	13	13	13
PREDICTED: zinc finger CCCH domain-containing protein 31 isoform X1	1	1	1	1
PREDICTED: zinc finger CCCH domain-containing protein 32	2	4	4	4
PREDICTED: zinc finger CCCH domain-containing protein 33 isoform X2	3	3	3	4
PREDICTED: zinc finger CCCH domain-containing protein 34-like	2	5	3	5
PREDICTED: zinc finger CCCH domain-containing protein 36	_	2	1	1
PREDICTED: zinc finger CCCH domain-containing protein 37	1	1	1	1
PREDICTED: zinc finger CCCH domain-containing protein 40-like	_	1	1	1
PREDICTED: zinc finger CCCH domain-containing protein 41	_	3	4	4
PREDICTED: zinc finger CCCH domain-containing protein 44	21	24	24	23
PREDICTED: zinc finger CCCH domain-containing protein 46 isoform X1	6	13	13	15
PREDICTED: zinc finger CCCH domain-containing protein 49-like	2	3	2	2
PREDICTED: zinc finger CCCH domain-containing protein 5	2	4	2	4
PREDICTED: zinc finger CCCH domain-containing protein 53	14	15	17	18
PREDICTED: zinc finger CCCH domain-containing protein 55-like	10	18	16	15
PREDICTED: zinc finger CCCH domain-containing protein 6	5	4	5	5
PREDICTED: zinc finger CCCH domain-containing protein 64 isoform X1	1	3	2	2
PREDICTED: zinc finger CCCH domain-containing protein 65-like	1	1		1
PREDICTED: zinc finger CCCH domain-containing protein 67 isoform X1	1	2	2	2
PREDICTED: zinc finger CCCH domain-containing protein 6-like	3	2	2	6
PREDICTED: zinc finger CCCH domain-containing protein ZFN-like	3	3	3	3
Zinc finger CCCH domain-containing protein	1	1	1	1
Zinc finger CCCH domain-containing protein 40	1	1	1	1
PREDICTED: zinc finger CCCH domain-containing protein 48-like	7	11	12	11
PREDICTED: squamosa promoter-binding-like protein 12	1	3	3	3
PREDICTED: squamosa promoter-binding-like protein 13A, partial	1	3	3	3
PREDICTED: squamosa promoter-binding-like protein 16-like isoform 1	1	1	_	1
PREDICTED: squamosa promoter-binding-like protein 17	_	1	1	1
PREDICTED: squamosa promoter-binding-like protein 7	2	4	4	4
PREDICTED: squamosa promoter-binding-like protein 8	1	5	4	5
PREDICTED: squamosa promoter-binding-like protein 9	2	9	2	2
SQUAMOSA	_	_	1	1
SQUAMOSA promoter binding protein-like 1, partial	5	6	5	5
SQUAMOSA promoter binding protein-like 10, partial	9	11	14	13
SQUAMOSA promoter binding protein-like 11, partial	_	1	1	1
SQUAMOSA promoter binding protein-like 12, partial	2	3	2	3
SQUAMOSA promoter binding protein-like 13, partial	14	6	6	6
SQUAMOSA promoter binding protein-like 14, partial	1	3	2	2
SQUAMOSA promoter binding protein-like 15, partial	_	2	2	2
SQUAMOSA promoter binding protein-like 2, partial	3	8	6	6
SQUAMOSA promoter binding protein-like 3, partial	3	3	4	4
squamosa promoter binding protein-like 4, partial	8	8	8	7
SQUAMOSA promoter binding protein-like 5, partial	2	2	5	2
SQUAMOSA promoter binding protein-like 6, partial	5	2	10	10
SQUAMOSA promoter binding protein-like 7, partial	1	1	1	1
Squamosa promoter-binding protein transcription factor family protein, putative isoform 2	1	1	1	1
squamosa protein	_	1	1	1
PREDICTED: zinc finger protein JACKDAW	9	10	13	13
PREDICTED: zinc finger protein JACKDAW-like	12	16	18	18
MYC-GP	5	6	6	7
MYC-RP	4	3	4	4
PREDICTED: transcription factor MYC2	6	10	12	12
PREDICTED: transcription factor MYC4-like	8	9	10	10
transcription factor MYC2	4	5	6	5
PREDICTED: zinc finger protein NUTCRACKER-like	15	22	19	16
PREDICTED: WUSCHEL-related homeobox 1	2	2	3	4
PREDICTED: WUSCHEL-related homeobox 4-like	2	2	2	2
PREDICTED: WUSCHEL-related homeobox 8	3	3	3	4
class 1 knox protein	3	3	3	3
FAR1; Zinc finger, SWIM-type	4	5	4	4
PREDICTED: protein FAR1-RELATED SEQUENCE 11	7	6	6	5
PREDICTED: protein FAR1-RELATED SEQUENCE 2 isoform X2	2	4	2	3
PREDICTED: protein FAR1-RELATED SEQUENCE 3-like	3	4	3	3
PREDICTED: protein FAR1-RELATED SEQUENCE 4	4	3	4	4
PREDICTED: protein FAR1-RELATED SEQUENCE 5	9	12	9	9
PREDICTED: protein FAR1-RELATED SEQUENCE 6 isoform X1	5	3	3	3
PREDICTED: protein FAR1-RELATED SEQUENCE 7-like	10	11	11	11
PREDICTED: protein FAR1-RELATED SEQUENCE 8 isoform X1	2	2	2	2
PREDICTED: protein FAR1-RELATED SEQUENCE 9	1	2	2	2
PREDICTED: putative protein FAR1-RELATED SEQUENCE 10	_	2	_	2
PREDICTED: E2F transcription factor-like E2FE	3	6	5	6
PREDICTED: NF-X1-type zinc finger protein NFXL1	5	2	2	2
PREDICTED: NF-X1-type zinc finger protein NFXL2	4	2	3	4
PREDICTED: transcription factor VOZ1/ VOZ1-LIKE	3	5	5	5
PREDICTED: heat stress transcription factor A-1b	1	1	1	2
PREDICTED: heat stress transcription factor A-2c	5	5	5	5
PREDICTED: heat stress transcription factor A-3-like	_	1	1	1
PREDICTED: heat stress transcription factor A-4a	2	2	2	3
PREDICTED: heat stress transcription factor A-5	1	1	1	1
PREDICTED: heat stress transcription factor A-8	1	1	1	1
PREDICTED: heat stress transcription factor B-2a-like	6	10	11	11
PREDICTED: heat stress transcription factor B-2b	1	4	2	2
PREDICTED: heat stress transcription factor B-4-like	4	4	3	3
PREDICTED: heat stress transcription factor C-1-like	5	5	5	5
PREDICTED: heat stress transcription factor A-1-like			1	_
PREDICTED: heat stress transcription factor A-1b	1	1	_
transcription factor NFYB	_	5	5	3
PREDICTED: LOW QUALITY PROTEIN: transcription factor TCP23	1	3	3	3
PREDICTED: transcription factor TCP10-like	5	6	6	6
PREDICTED: transcription factor TCP13-like	1	1	1	1
PREDICTED: transcription factor TCP14-like	2	4	3	2
PREDICTED: transcription factor TCP15-like	1	3	3	3
PREDICTED: transcription factor TCP20	3	4	3	4
PREDICTED: transcription factor TCP2-like	14	12	16	16
PREDICTED: transcription factor TCP4-like	4	4	2	3
PREDICTED: transcription factor TCP5	3	8	13	12
PREDICTED: transcription factor TCP7	3	3	3	3
PREDICTED: transcription factor TCP9	2	9	4	5
PREDICTED: transcription factor TCP12-like	1	_	_	_
PREDICTED: RING finger and CHY zinc finger domain-containing protein 1/ 1-like	21	11	18	17
PREDICTED: LOW QUALITY PROTEIN: transcription factor UNE10-like	5	5	5	4
PREDICTED: transcription factor UNE12 /UNE12-like	10	10	8	10
PREDICTED: transcription factor GTE9-like isoform X2	4	4	5	5
PREDICTED: transcription factor GTE8-like isoform X1	13	3	16	17
PREDICTED: transcription factor GTE7-like	1	1	1	1
PREDICTED: transcription factor GTE6	2	2	2	2
PREDICTED: transcription factor GTE4-like isoform X3	8	8	10	10
PREDICTED: transcription factor GTE1-like isoform X2	1	2	2	2
PREDICTED: transcription factor GTE10-like	9	8	9	8
transcription factor PAP1		3	1	2
PREDICTED: truncated transcription factor CAULIFLOWER A	1	3	3	3
PREDICTED: transcription factor VIP1-like	2	4	3	3
PREDICTED: transcription factor TGA1-like	4	4	2	3
PREDICTED: transcription factor TGA4-like isoform X1	2	2	_	_
PREDICTED: transcription factor SCREAM2	1	1	1	2
transcription factor LUX	8	9	9	10
PREDICTED: transcription factor LHW/ LHW-like	21	34	30	29
PREDICTED: probable transcription factor GLK1	8	7	10	10
PREDICTED: probable transcription factor GLK2	1	1	1	1
PREDICTED: probable transcription factor PosF21	4	6	7	7
PREDICTED: transcription factor HBP-1a-like	5	5	7	7
PREDICTED: transcription factor HBP-1b	15	18	22	21
transcription factor EIN3	1	1	1	1
PREDICTED: transcription factor BTF3	5	5	5	5
TLP transcription factor L, partial	1	3	3	3
PREDICTED: transcription factor SAC51-like	_	1	_	1
PREDICTED: transcription factor-like protein DPB	1	5	3	3
PREDICTED: transcription factor RF2b/RF2b-like	6	9	9	9
PREDICTED: transcription factor PIF1	1	1	1	_
PREDICTED: transcription factor PIF3 isoform X2	_	3	2	2
PREDICTED: transcription factor PIF4	3	4	2	1
PREDICTED: transcription factor PCL1/ PCL1-like	1	1	3	3
PREDICTED: transcription factor PRE1-like	2	2	1	1
transcription factor JUNGBRUNNEN 1	3	1	1	2
PREDICTED: transcription factor ILR3-like	3	1	4	4
PREDICTED: transcription factor HY5	_	2	2	2
PREDICTED: transcription factor HB29-like	1	1	1	_
transcription factor EMB1444/ EMB1444-like	5	4	4	_
transcription factor E2FB	2	4	4	4
transcription factor BIM1	1	2	2	2
PREDICTED: transcription factor BEE 2	3	1	4	4
transcription factor DIVARICATA / DIVARICATA-like	21	21	18	24
PREDICTED: transcription factor AS1	2	2	2	2
scarecrow-like transcription factor PAT1	3	3	4	2
phantastica transcription factor	_	1	_	1
