# Supplementary material for: Altered Developmental and Metabolic Gene Expression in Basil Interspecific Hybrids
Source: Plants (Basel). 2022 Jul 18;11(14):1873. doi: 10.3390/plants11141873 (PMC9321874; doi:10.3390/plants11141873)
Supplement: Supplementary file 1 [file plants-11-01873-s001.zip › Table S8_DGE_OBP1_vs_OKP2.XLSX.xlsx]

## Sheet: OKP2_Specific
Transcript ID	OKP2_Readcount
TR10002|c0_g1_i2	42
TR10018|c0_g1_i1	12
TR10024|c0_g1_i1	196
TR10025|c1_g1_i2	74
TR10027|c0_g1_i2	36
TR10029|c0_g1_i1	18
TR10029|c1_g1_i1	28
TR1003|c0_g1_i1	36
TR10035|c1_g1_i1	22
TR10040|c1_g1_i1	10
TR10043|c0_g2_i1	46
TR10048|c0_g1_i1	80
TR10064|c0_g2_i1	18
TR10069|c0_g2_i1	92
TR10081|c0_g2_i1	16
TR10115|c0_g1_i1	14
TR1013|c0_g1_i1	20
TR10135|c0_g1_i1	22
TR10157|c0_g2_i1	12
TR10172|c0_g2_i1	18
TR10174|c0_g1_i1	42
TR10182|c0_g1_i2	44
TR1020|c0_g1_i1	46
TR10204|c0_g1_i1	16
TR10213|c0_g2_i1	48
TR10214|c0_g1_i1	20
TR10216|c0_g1_i1	20
TR10258|c0_g1_i1	16
TR10260|c0_g1_i1	36
TR1027|c0_g1_i1	62
TR1027|c0_g1_i5	36
TR10282|c0_g1_i1	14
TR10292|c0_g1_i1	26
TR10292|c0_g1_i2	36
TR10294|c1_g1_i1	22
TR10295|c0_g1_i2	38
TR10296|c0_g1_i1	14
TR10307|c0_g1_i1	14
TR10316|c0_g1_i1	30
TR10336|c0_g1_i2	20
TR10345|c0_g1_i1	92
TR10345|c0_g2_i1	28
TR10346|c0_g1_i1	48
TR10346|c0_g3_i1	66
TR10356|c0_g1_i1	22
TR10358|c0_g1_i1	58
TR10380|c0_g1_i1	22
TR10386|c0_g1_i1	12
TR10397|c0_g1_i2	50
TR10398|c0_g1_i1	26
TR10408|c0_g1_i1	10
TR10408|c0_g1_i2	30
TR10434|c0_g2_i1	24
TR10436|c0_g1_i1	38
TR1044|c0_g2_i1	24
TR10506|c0_g1_i1	18
TR10513|c0_g2_i1	18
TR10514|c0_g2_i1	14
TR10550|c0_g1_i2	66
TR10558|c0_g1_i1	16
TR10562|c0_g1_i1	14
TR10563|c0_g1_i1	50
TR1058|c0_g1_i1	66
TR10583|c0_g1_i1	26
TR10609|c0_g1_i1	18
TR10614|c0_g1_i1	18
TR10629|c0_g1_i1	76
TR10629|c0_g1_i2	82
TR1063|c0_g1_i1	12
TR10637|c0_g3_i1	22
TR10650|c0_g1_i1	26
TR10654|c0_g1_i1	50
TR10656|c0_g1_i1	18
TR10666|c0_g2_i1	22
TR1067|c0_g1_i1	18
TR10694|c0_g1_i1	106
TR10694|c0_g2_i1	40
TR1072|c0_g1_i1	18
TR10741|c0_g1_i1	26
TR10743|c0_g1_i1	20
TR10747|c0_g1_i1	12
TR10750|c0_g2_i1	24
TR10756|c0_g1_i1	68
TR10758|c0_g1_i1	28
TR10763|c0_g1_i1	14
TR10769|c0_g1_i1	16
TR10783|c0_g1_i1	126
TR10783|c0_g1_i3	304
TR10783|c0_g1_i5	188
TR1079|c0_g1_i1	136
TR1080|c0_g1_i1	26
TR1080|c0_g2_i1	20
TR10814|c0_g1_i1	50
TR10814|c0_g2_i1	222
TR1083|c0_g2_i1	18
TR10850|c0_g2_i1	30
TR10852|c0_g1_i2	16
TR1086|c0_g1_i1	16
TR1086|c0_g2_i1	20
TR10865|c0_g1_i1	12
TR10870|c0_g1_i1	328
TR10872|c0_g1_i1	60
TR10884|c0_g1_i1	60
TR10898|c0_g1_i1	8
TR10900|c0_g1_i1	14
TR10915|c0_g1_i3	14
TR10929|c0_g1_i1	22
TR1093|c0_g1_i1	14
TR10936|c0_g1_i1	80
TR10938|c0_g1_i1	28
TR1094|c0_g1_i2	12
TR10951|c0_g2_i1	20
TR1099|c0_g1_i2	32
TR10990|c0_g1_i1	22
TR11015|c0_g2_i1	24
TR11019|c0_g1_i1	58
TR1102|c0_g1_i1	40
TR11025|c0_g1_i1	12
TR11026|c0_g1_i1	18
TR11028|c0_g1_i1	22
TR11047|c0_g1_i1	54
TR11073|c0_g1_i1	24
TR1109|c0_g1_i1	32
TR11096|c0_g1_i1	16
TR1110|c0_g1_i1	12
TR11108|c0_g1_i1	12
TR11137|c0_g1_i1	32
TR11139|c0_g2_i1	18
TR1115|c0_g1_i1	52
TR11151|c0_g1_i1	14
TR112|c0_g1_i1	12
TR1122|c0_g1_i1	10
TR11224|c0_g1_i1	12
TR11234|c0_g1_i1	12
TR11237|c0_g2_i1	14
TR11239|c0_g1_i1	42
TR11248|c0_g1_i1	40
TR11249|c0_g1_i1	20
TR11252|c0_g1_i1	54
TR11254|c0_g1_i1	18
TR11263|c0_g1_i1	14
TR11266|c0_g1_i1	20
TR11271|c0_g1_i1	44
TR11281|c0_g1_i1	34
TR11285|c0_g1_i1	14
TR11293|c0_g1_i1	26
TR1130|c0_g1_i1	30
TR11307|c0_g1_i1	12
TR11338|c0_g1_i1	56
TR11338|c0_g1_i2	24
TR11350|c0_g2_i1	30
TR11353|c0_g1_i1	26
TR11362|c0_g1_i1	18
TR11365|c0_g1_i1	14
TR11379|c0_g1_i1	34
TR11401|c0_g1_i1	16
TR11406|c0_g1_i1	20
TR11407|c0_g1_i1	46
TR11415|c0_g1_i1	86
TR11468|c0_g1_i1	54
TR11471|c0_g2_i1	16
TR1148|c0_g2_i1	18
TR11485|c0_g1_i1	92
TR11492|c0_g1_i1	56
TR11494|c0_g1_i1	42
TR1150|c0_g1_i1	12
TR11505|c0_g1_i1	10
TR11509|c0_g1_i1	50
TR11523|c0_g1_i1	30
TR11554|c0_g1_i1	86
TR11561|c0_g1_i1	24
TR11563|c0_g1_i1	22
TR11569|c1_g1_i1	12
TR11591|c0_g1_i1	24
TR11614|c0_g1_i1	18
TR11623|c0_g1_i1	26
TR11627|c0_g1_i1	26
TR11641|c0_g1_i1	26
TR11644|c0_g1_i1	26
TR11644|c0_g2_i1	22
TR11644|c0_g3_i1	58
TR11646|c0_g1_i1	152
TR11657|c0_g1_i1	14
TR11672|c0_g1_i1	14
TR11686|c0_g1_i1	14
TR1171|c0_g1_i2	42
TR11714|c0_g1_i1	46
TR11735|c0_g1_i1	18
TR1174|c0_g1_i1	14
TR11743|c0_g1_i1	12
TR11752|c0_g1_i1	26
TR1178|c0_g1_i1	28
TR1178|c1_g2_i1	40
TR11783|c0_g1_i1	42
TR11804|c0_g2_i1	18
TR1181|c0_g2_i1	38
TR11815|c0_g1_i1	12
TR11817|c0_g1_i1	28
TR11832|c0_g1_i1	76
TR11839|c0_g1_i1	24
TR11845|c0_g2_i1	30
TR11851|c0_g1_i1	18
TR11862|c0_g1_i1	24
TR11862|c1_g1_i1	68
TR11867|c0_g1_i1	16
TR11873|c0_g1_i1	16
TR11880|c0_g1_i1	28
TR11881|c0_g1_i1	44
TR1189|c0_g1_i2	14
TR11892|c0_g2_i1	12
TR1190|c0_g1_i1	46
TR11919|c0_g2_i2	12
TR11930|c0_g1_i1	88
TR11932|c0_g1_i1	46
TR11932|c0_g2_i1	22
TR11935|c0_g1_i1	40
TR11939|c0_g1_i1	20
TR11949|c0_g1_i1	236
TR11959|c0_g1_i1	30
TR11959|c0_g2_i1	70
TR1196|c0_g1_i1	14
TR11962|c0_g1_i1	86
TR11981|c0_g3_i1	24
TR1199|c0_g1_i1	18
TR12021|c0_g1_i1	192
TR12024|c0_g1_i1	16
TR12024|c0_g1_i3	76
TR12046|c0_g1_i2	30
TR12055|c0_g1_i1	26
TR1206|c0_g1_i2	12
TR12064|c0_g1_i1	86
TR12065|c0_g1_i1	32
TR12065|c0_g2_i1	54
TR12065|c0_g3_i1	130
TR12085|c0_g1_i1	20
TR12101|c0_g1_i1	40
TR12106|c0_g2_i1	18
TR12107|c0_g1_i1	80
TR12107|c0_g1_i2	72
TR12109|c0_g1_i1	194
TR12112|c0_g1_i1	22
TR12125|c0_g2_i1	70
TR12126|c0_g1_i1	32
TR12126|c0_g3_i1	38
TR12131|c1_g1_i1	16
TR12150|c0_g1_i1	16
TR12173|c0_g1_i1	30
TR12184|c0_g1_i1	30
TR12192|c0_g1_i1	22
TR1220|c0_g1_i1	12
TR12212|c0_g1_i1	22
TR12213|c0_g1_i1	22
TR12240|c0_g1_i1	28
TR12264|c0_g1_i1	14
TR12267|c0_g1_i1	16
TR12267|c2_g1_i1	18
TR12273|c0_g1_i1	20
TR12273|c0_g2_i1	104
TR12286|c0_g1_i1	12
TR12288|c0_g1_i1	28
TR1229|c0_g1_i2	26
TR12292|c0_g1_i1	24
TR12292|c0_g2_i1	30
TR12308|c0_g1_i1	84
TR12308|c0_g1_i2	80
TR12317|c0_g1_i1	96
TR12324|c0_g1_i1	114
TR12324|c0_g2_i1	30
TR12331|c0_g2_i1	20
TR12334|c0_g1_i1	24
TR12352|c0_g1_i1	26
TR12352|c1_g1_i1	46
TR12356|c0_g1_i1	20
TR12358|c0_g1_i1	142
TR12374|c0_g2_i1	18
TR1239|c0_g1_i1	76
TR12393|c0_g1_i1	24
TR12397|c0_g1_i1	26
TR12412|c0_g1_i1	438
TR1242|c0_g1_i1	114
TR12421|c0_g1_i1	34
TR12429|c0_g1_i1	14
TR12441|c0_g1_i1	30
TR12443|c0_g1_i1	24
TR12458|c0_g1_i1	32
TR12460|c0_g1_i1	254
TR12465|c0_g1_i1	40
TR12465|c1_g1_i1	16
TR12466|c0_g1_i1	14
TR12466|c0_g1_i2	32
TR12466|c0_g1_i3	56
TR12487|c2_g1_i1	36
TR12502|c0_g1_i1	26
TR12503|c0_g1_i1	16
TR12504|c0_g1_i1	14
TR12514|c0_g1_i1	16
TR12522|c0_g2_i1	44
TR12552|c0_g1_i1	22
TR1256|c0_g1_i1	176
TR12564|c0_g1_i1	74
TR12564|c0_g2_i1	32
TR1259|c0_g1_i1	22
TR12611|c0_g1_i1	28
TR12613|c0_g1_i1	12
TR12630|c0_g1_i1	14
TR12635|c0_g1_i1	24
TR12645|c0_g2_i1	158
TR12650|c0_g1_i1	18
TR12661|c0_g1_i1	18
TR12689|c0_g1_i1	20
TR12691|c0_g1_i1	50
TR12716|c0_g1_i1	10
TR12722|c0_g1_i1	58
TR12723|c0_g1_i1	20
TR12726|c0_g1_i1	508
TR12729|c0_g3_i1	34
TR12737|c0_g1_i1	18
TR12744|c0_g1_i1	56
TR12750|c0_g1_i3	30
TR12756|c0_g1_i1	24
TR12808|c0_g1_i1	32
TR12816|c0_g1_i2	34
TR12848|c0_g1_i1	36
TR12855|c0_g1_i1	78
TR12871|c0_g1_i1	14
TR12878|c0_g1_i1	16
TR1288|c0_g1_i1	14
TR12886|c0_g1_i2	26
TR12890|c0_g1_i1	32
TR12897|c0_g1_i1	12
TR12920|c0_g1_i1	30
TR12929|c0_g1_i1	44
TR12929|c0_g2_i1	42
TR12936|c0_g1_i1	16
TR12938|c0_g1_i1	32
TR12977|c0_g1_i1	22
TR12981|c0_g1_i1	20
TR12981|c1_g1_i1	38
TR130|c0_g1_i1	18
TR13021|c0_g1_i1	18
TR13023|c0_g1_i1	12
TR13029|c0_g1_i1	30
TR13050|c0_g1_i1	52
TR13052|c0_g1_i1	14
TR13065|c0_g1_i1	40
TR13070|c0_g1_i1	24
TR13072|c0_g2_i1	32
TR13082|c0_g2_i1	38
TR13117|c0_g2_i1	20
TR1312|c0_g1_i1	34
TR13125|c0_g1_i1	16
TR13127|c0_g2_i1	18
TR13128|c0_g2_i1	14
TR13131|c0_g1_i1	24
TR13138|c0_g1_i1	12
TR13160|c0_g1_i1	22
TR13161|c0_g1_i1	16
TR13193|c0_g1_i1	14
TR1320|c2_g1_i1	122
TR13204|c0_g4_i1	22
TR13207|c0_g2_i1	14
TR13208|c0_g1_i1	82
TR13220|c0_g1_i1	14
TR1323|c0_g2_i1	12
TR13252|c0_g2_i1	26
TR13254|c0_g1_i1	46
TR13286|c0_g1_i2	16
TR13287|c0_g1_i1	26
TR13288|c0_g1_i1	20
TR13299|c0_g1_i1	48
TR1330|c0_g1_i1	14
TR1331|c0_g1_i1	18
TR1331|c0_g2_i1	24
TR13322|c0_g1_i1	18
TR13337|c0_g1_i1	54
TR13343|c0_g1_i1	44
TR13352|c0_g1_i1	44
TR13358|c0_g1_i1	14
TR13383|c0_g2_i1	24
TR13389|c0_g1_i1	20
TR13397|c0_g2_i1	20
TR13399|c0_g1_i1	22
TR134|c0_g2_i1	16
TR1340|c0_g3_i1	30
TR13400|c0_g1_i1	20
TR13413|c0_g2_i1	14
TR13415|c0_g1_i1	24
TR13424|c0_g1_i1	32
TR13424|c0_g1_i3	24
TR13434|c0_g1_i1	24
TR13434|c0_g1_i3	22
TR13441|c0_g1_i2	68
TR13452|c0_g1_i1	12
TR13467|c1_g2_i1	22
TR13481|c0_g1_i1	12
TR13488|c0_g1_i1	18
TR13501|c0_g1_i1	16
TR13503|c0_g1_i1	12
TR13512|c0_g1_i1	24
TR1352|c0_g1_i1	18
TR13527|c0_g1_i1	78
TR13531|c0_g1_i1	12
TR13533|c0_g1_i1	22
TR1354|c1_g1_i1	32
TR13565|c0_g2_i1	50
TR13567|c0_g1_i1	18
TR13571|c0_g1_i1	30
TR13572|c0_g1_i1	22
TR13583|c0_g2_i1	16
TR13588|c0_g1_i1	24
TR13589|c0_g1_i1	20
TR13592|c0_g1_i1	18
TR13595|c0_g1_i1	76
TR13596|c0_g1_i1	18
TR13628|c0_g1_i1	14
TR13655|c0_g1_i1	12
TR13661|c0_g1_i1	18
TR13668|c0_g1_i2	36
TR13668|c0_g1_i3	14
TR13684|c0_g1_i1	16
TR13689|c0_g1_i2	20
TR13695|c0_g2_i1	58
TR13702|c0_g1_i1	72
TR13707|c0_g1_i1	12
TR13715|c0_g1_i1	32
TR13721|c0_g2_i1	16
TR13751|c0_g1_i1	16
TR13760|c1_g1_i1	28
TR13762|c0_g1_i1	34
TR13764|c0_g1_i1	26
TR13772|c0_g1_i1	74
TR1379|c0_g1_i1	14
TR13790|c0_g1_i1	44
TR13790|c0_g1_i3	26
TR13792|c0_g1_i2	20
TR1380|c0_g1_i1	22
TR13814|c0_g1_i1	78
TR13829|c0_g1_i1	32
TR13835|c0_g2_i1	14
TR13851|c0_g1_i1	20
TR13867|c0_g2_i1	12
TR1387|c0_g3_i1	26
TR13874|c0_g3_i2	58
TR1389|c0_g1_i1	30
TR13899|c0_g1_i1	54
TR13908|c0_g1_i2	118
TR13941|c0_g1_i1	10
TR13942|c0_g1_i1	24
TR13948|c0_g2_i1	42
TR13966|c0_g1_i1	46
TR13987|c0_g1_i2	58
TR13991|c0_g1_i1	22
TR13993|c0_g1_i1	12
TR13994|c0_g1_i1	30
TR14000|c0_g1_i1	18
TR14011|c0_g1_i1	18
TR14014|c0_g1_i1	24
TR14020|c0_g2_i1	14
TR14038|c0_g1_i1	16
TR14046|c0_g1_i1	26
TR14050|c0_g1_i1	10
TR14055|c0_g1_i1	24
TR14059|c0_g1_i1	30
TR14086|c0_g1_i1	76
TR14086|c0_g2_i1	56
TR14086|c0_g3_i1	52
TR14086|c0_g4_i1	56
TR14089|c0_g1_i1	26
TR14100|c0_g1_i1	10
TR14102|c0_g2_i1	16
TR14104|c0_g1_i1	24
TR14107|c0_g1_i2	44
TR14120|c0_g1_i1	14
TR14123|c0_g1_i1	24
TR14126|c0_g1_i1	38
TR14143|c0_g1_i1	20
TR14162|c0_g1_i1	126
TR14162|c0_g2_i1	14
TR14171|c0_g1_i1	80
TR14171|c0_g2_i1	72
TR14183|c0_g1_i1	14
TR14188|c0_g1_i1	10
TR1419|c0_g1_i1	16
TR14201|c0_g2_i1	32
TR14207|c0_g2_i1	12
TR14249|c0_g1_i1	18
TR14258|c0_g1_i1	80
TR14266|c1_g1_i1	52
TR14277|c0_g1_i1	28
TR1428|c0_g1_i1	32
TR14284|c0_g1_i1	30
TR14289|c0_g1_i1	14
TR14294|c0_g1_i1	66
TR14294|c0_g2_i1	38
TR1430|c0_g2_i1	22
TR14300|c0_g1_i1	28
TR14310|c0_g1_i1	14
TR14312|c0_g1_i1	24
TR14317|c0_g2_i1	20
TR14323|c0_g1_i2	40
TR14340|c0_g1_i1	24
TR14340|c0_g1_i2	24
TR14347|c0_g1_i2	26
TR14369|c0_g1_i1	132
TR14390|c0_g1_i1	58
TR14392|c0_g1_i1	44
TR14393|c0_g2_i1	12
TR14401|c0_g1_i1	12
TR1441|c0_g2_i1	32
TR14418|c0_g1_i1	28
TR14445|c0_g1_i1	26
TR14451|c0_g1_i1	60
TR1447|c0_g1_i1	34
TR1448|c0_g1_i1	36
TR14480|c0_g1_i1	12
TR14485|c0_g1_i1	62
TR14485|c0_g3_i1	26
TR14501|c0_g1_i1	46
TR14509|c0_g2_i1	28
TR14516|c0_g2_i1	24
TR14518|c0_g1_i1	72
TR14518|c0_g1_i2	66
TR1453|c0_g1_i1	28
TR14551|c0_g1_i1	76
TR14552|c0_g1_i1	62
TR14579|c0_g1_i1	18
TR14591|c0_g1_i2	30
TR14595|c0_g1_i1	106
TR14596|c0_g1_i1	12
TR14602|c0_g1_i1	496
TR14614|c0_g1_i1	14
TR14617|c0_g1_i1	18
TR14625|c1_g1_i1	42
TR14627|c0_g1_i1	70
TR14639|c0_g1_i1	130
TR14642|c0_g1_i1	12
TR14646|c0_g1_i1	16
TR1465|c0_g1_i1	18
TR1465|c0_g1_i2	40
TR14650|c0_g1_i1	16
TR1466|c0_g2_i1	48
TR14666|c0_g1_i1	14
TR14668|c0_g1_i1	24
TR14670|c0_g1_i1	34
TR14676|c0_g1_i1	26
TR14684|c0_g1_i1	36
TR14686|c0_g1_i1	14
TR14690|c0_g1_i1	156
TR14702|c0_g2_i1	14
TR14709|c0_g1_i1	16
TR14719|c0_g1_i1	42
TR14720|c0_g1_i1	54
TR14722|c0_g1_i1	28
TR14729|c0_g1_i1	38
TR14729|c0_g2_i1	36
TR14731|c0_g2_i1	52
TR14733|c0_g1_i1	12
TR14735|c0_g1_i1	44
TR14772|c0_g2_i1	32
TR1479|c0_g2_i1	32
TR148|c0_g1_i1	40
TR14802|c0_g1_i1	36
TR14802|c1_g1_i1	40
TR14822|c0_g1_i1	14
TR14832|c0_g1_i2	20
TR14839|c0_g1_i1	18
TR14840|c0_g1_i1	26
TR14851|c0_g1_i2	28
TR14855|c0_g1_i1	16
TR1486|c0_g1_i1	32
TR14866|c0_g2_i1	26
TR14869|c0_g1_i1	12
TR14876|c0_g1_i1	16
TR14887|c0_g1_i1	50
TR14899|c0_g1_i1	16
TR14907|c0_g1_i1	60
TR14907|c0_g2_i1	14
TR14914|c0_g1_i1	28
TR14915|c0_g1_i1	30
TR14915|c0_g1_i3	22
TR14947|c0_g1_i1	16
TR14959|c0_g1_i1	24
TR14985|c0_g1_i1	50
TR14987|c0_g1_i1	64
TR14992|c0_g1_i1	40
TR15010|c0_g1_i1	24
TR15015|c0_g1_i2	30
TR15017|c0_g1_i2	18
TR15024|c0_g1_i1	16
TR15031|c0_g2_i1	12
TR1504|c0_g2_i1	22
TR1507|c0_g2_i1	32
TR15081|c0_g2_i1	18
TR15085|c0_g1_i1	28
TR15087|c0_g1_i1	20
TR15088|c0_g3_i1	54
TR1509|c0_g1_i1	62
TR15097|c0_g1_i1	38
TR15098|c0_g1_i1	130
TR151|c0_g1_i1	56
TR151|c1_g1_i1	76
TR15116|c0_g1_i1	38
TR15121|c0_g1_i1	16
TR15121|c0_g1_i2	10
TR15122|c0_g1_i2	42
TR15129|c0_g1_i1	36
TR15134|c0_g1_i1	36
TR15146|c0_g2_i1	14
TR15151|c0_g1_i1	36
TR1516|c0_g1_i1	26
TR15166|c0_g1_i1	52
TR15200|c1_g1_i1	12
TR1522|c0_g1_i1	26
TR1522|c1_g1_i1	28
TR15228|c0_g1_i1	22
TR15245|c0_g1_i1	24
TR15246|c0_g2_i1	10
TR1525|c0_g2_i1	14
TR15253|c0_g1_i1	14
TR15280|c0_g1_i1	18
TR15282|c1_g1_i1	14
TR153|c0_g1_i1	10
TR15302|c0_g1_i2	28
TR15305|c0_g1_i1	134
TR15305|c0_g1_i2	368
TR1531|c0_g1_i1	32
TR15313|c0_g1_i1	26
TR15340|c0_g1_i1	108
TR15351|c0_g1_i1	14
TR15363|c0_g1_i1	18
TR15377|c0_g1_i1	32
TR15391|c0_g1_i1	76
TR15419|c0_g2_i1	60
TR15429|c0_g1_i1	26
TR15444|c0_g1_i1	56
TR15463|c0_g1_i1	20
TR15468|c0_g1_i1	34
TR1548|c0_g1_i1	56
TR1548|c0_g2_i1	82
TR15501|c0_g1_i1	32
TR15503|c0_g1_i1	12
TR15506|c0_g1_i1	34
TR15515|c0_g1_i3	34
TR15516|c0_g1_i1	16
TR15517|c0_g1_i2	26
TR15517|c0_g1_i3	16
TR15523|c0_g1_i1	18
TR15524|c0_g1_i1	22
TR15537|c0_g2_i1	18
TR15568|c0_g1_i1	26
TR15574|c0_g1_i1	38
TR15584|c0_g1_i1	130
TR15584|c0_g2_i1	46
TR15599|c0_g1_i1	8
TR15622|c0_g2_i1	30
TR15646|c0_g1_i1	160
TR15665|c0_g1_i1	18
TR15678|c0_g2_i1	16
TR15682|c0_g1_i1	12
TR15683|c0_g1_i1	22
TR15698|c0_g2_i1	58
TR15703|c0_g1_i2	50
TR15704|c0_g1_i1	14
TR15706|c0_g1_i1	60
TR15725|c0_g1_i2	32
TR15756|c0_g2_i1	16
TR15757|c1_g1_i1	96
TR15767|c0_g2_i1	14
TR1577|c0_g1_i1	20
TR15773|c0_g1_i1	80
TR15776|c0_g1_i1	14
TR15797|c0_g1_i1	18
TR1580|c0_g1_i1	188
TR15813|c0_g2_i1	20
TR15818|c0_g1_i1	16
TR15820|c0_g1_i1	104
TR15857|c0_g1_i1	60
TR15858|c0_g1_i1	16
TR15863|c0_g1_i2	14
TR1588|c0_g1_i1	26
TR15892|c0_g1_i1	46
TR15898|c1_g1_i3	36
TR15906|c0_g1_i1	22
TR15913|c0_g1_i2	30
TR15915|c0_g2_i1	14
TR15927|c0_g2_i1	22
TR1594|c0_g1_i1	28
TR15944|c0_g1_i1	64
TR15947|c0_g1_i1	48
TR15953|c0_g1_i1	42
TR15955|c0_g1_i1	18
TR1596|c0_g1_i2	26
TR15977|c0_g2_i1	30
TR15994|c0_g1_i1	20
TR15999|c0_g1_i1	32
TR16000|c0_g1_i1	12
TR16005|c0_g1_i1	18
TR16016|c0_g1_i1	12
TR16020|c1_g1_i1	18
TR16033|c0_g1_i1	28
TR16037|c0_g1_i1	64
TR16047|c0_g1_i1	110
TR16054|c1_g1_i1	38
TR16056|c1_g1_i1	18
TR16128|c0_g1_i1	18
TR16129|c0_g1_i1	20
TR16137|c0_g1_i1	20
TR16141|c0_g1_i1	122
TR16141|c0_g2_i1	58
TR16143|c0_g1_i1	54
TR16149|c0_g1_i1	30
TR1615|c0_g2_i1	118
TR16152|c0_g2_i1	18
TR16166|c0_g2_i1	10
TR16174|c0_g1_i1	32
TR16201|c0_g1_i2	14
TR16213|c0_g2_i1	16
TR16214|c0_g3_i2	16
TR16225|c0_g1_i1	62
TR16225|c0_g1_i2	26
TR16237|c0_g2_i2	634
TR16242|c0_g1_i1	36
TR16270|c0_g1_i1	32
TR16283|c0_g1_i1	16
TR16286|c0_g1_i1	24
TR16302|c0_g2_i1	12
TR16307|c0_g1_i1	100
TR16308|c0_g1_i1	56
TR16325|c0_g2_i2	20
TR16331|c0_g1_i1	36
TR16332|c0_g1_i1	38
TR16368|c0_g3_i1	16
TR16382|c0_g1_i1	64
TR16382|c0_g2_i1	22
TR16382|c0_g3_i1	108
TR16410|c0_g1_i2	12
TR16438|c0_g1_i1	14
TR1644|c0_g1_i1	20
TR16441|c1_g1_i1	22
TR16464|c0_g1_i1	62
TR16469|c0_g1_i1	20
TR16469|c0_g2_i1	26
TR16472|c0_g1_i1	534
TR16472|c0_g1_i2	480
TR16490|c0_g1_i1	52
TR16492|c0_g1_i2	16
TR16495|c0_g1_i1	60
TR16495|c0_g2_i1	34
TR16500|c0_g1_i1	18
TR16509|c0_g1_i1	18
TR16509|c1_g1_i1	5452
TR1652|c0_g1_i1	38
TR1652|c0_g2_i2	30
TR1652|c1_g1_i1	10
TR16522|c0_g1_i2	56
TR16524|c0_g1_i1	16
TR16527|c0_g1_i1	14
TR16537|c0_g1_i1	40
TR16545|c0_g1_i1	20
TR16559|c0_g1_i2	22
TR1656|c0_g1_i1	14
TR16571|c0_g2_i1	20
TR16572|c0_g1_i1	72
TR16582|c0_g1_i1	22
TR16589|c0_g1_i1	74
TR16594|c0_g2_i1	10
TR16599|c0_g1_i1	34
TR16599|c0_g1_i2	40
TR16601|c0_g1_i1	52
TR16605|c1_g1_i1	16
TR16609|c0_g1_i1	36
TR1661|c0_g3_i1	16
TR16614|c0_g1_i1	98
TR16617|c0_g1_i1	4990
TR16617|c0_g1_i2	4944
TR16624|c0_g1_i1	34
TR16628|c0_g2_i1	38
TR16629|c0_g1_i2	28
TR1663|c0_g1_i1	36
TR16655|c0_g1_i1	24
TR16656|c0_g1_i1	60
TR16656|c0_g1_i2	66
TR16658|c0_g1_i1	16
TR16666|c0_g1_i1	106
TR16666|c0_g2_i1	112
TR16666|c0_g2_i2	100
TR16668|c0_g1_i1	20
TR1667|c0_g1_i3	584
TR16678|c0_g1_i1	122
TR16678|c0_g2_i1	64
TR16680|c1_g1_i1	10
TR16684|c0_g1_i1	48
TR16685|c0_g1_i1	10
TR16698|c0_g2_i1	18
TR16709|c0_g1_i1	28
TR16723|c0_g1_i1	48
TR16726|c0_g1_i1	24
TR16728|c0_g1_i2	30
TR1673|c0_g1_i1	98
TR16751|c0_g1_i1	10
TR16757|c0_g1_i1	24
TR16757|c0_g1_i2	28
TR16785|c0_g1_i1	18
TR16790|c0_g1_i1	32
TR16800|c0_g1_i1	26
TR16806|c0_g2_i1	14
TR16826|c0_g2_i1	20
TR16841|c0_g1_i1	12
TR1685|c0_g1_i1	16
TR16880|c0_g1_i1	14
TR1689|c1_g1_i1	12
TR16890|c0_g1_i1	40
TR16920|c0_g1_i1	24
TR16944|c0_g1_i1	28
TR16948|c0_g2_i1	20
TR16961|c0_g1_i1	56
TR16962|c0_g1_i1	20
TR16974|c0_g2_i1	12
TR16986|c0_g1_i2	38
TR16990|c0_g1_i1	28
TR16991|c0_g1_i2	58
TR16999|c0_g2_i1	28
TR17015|c0_g1_i1	22
TR17021|c0_g1_i2	36
TR17023|c0_g1_i1	58
TR17035|c0_g1_i1	22
TR1704|c0_g1_i3	14
TR17062|c0_g1_i1	16
TR17063|c0_g1_i1	36
TR17063|c0_g1_i2	34
TR17081|c0_g1_i1	20
TR17091|c0_g1_i1	74
TR17091|c0_g1_i2	84
TR17091|c0_g1_i3	52
TR17091|c0_g1_i4	62
TR17092|c0_g1_i1	16
TR17098|c0_g1_i1	222
TR17099|c0_g1_i1	20
TR1710|c0_g1_i1	26
TR1710|c0_g1_i3	24
TR1710|c1_g1_i1	42
TR17110|c0_g1_i1	20
TR17121|c0_g2_i1	52
TR17142|c0_g1_i1	12
TR17152|c0_g1_i1	40
TR17157|c0_g1_i1	18
TR17160|c0_g1_i1	44
TR17163|c0_g1_i2	38
TR17163|c0_g1_i3	60
TR17166|c0_g1_i1	184
TR17166|c0_g3_i1	168
TR17168|c0_g1_i2	30
TR17212|c0_g1_i2	14
TR17219|c0_g1_i1	32
TR17221|c0_g1_i1	10
TR17240|c0_g1_i1	26
TR17245|c0_g1_i1	40
TR17265|c0_g1_i1	28
TR17265|c0_g2_i1	22
TR17267|c0_g2_i1	14
TR1728|c0_g2_i1	18
TR17284|c0_g1_i1	44
TR17290|c0_g1_i1	28
TR17291|c0_g1_i1	844
TR17291|c0_g2_i1	260
TR17293|c0_g1_i1	18
TR17302|c0_g1_i1	56
TR17305|c0_g1_i1	70
TR17307|c0_g1_i1	40
TR1731|c0_g2_i1	178
TR17311|c0_g1_i1	64
TR17311|c0_g1_i2	162
TR17319|c0_g1_i1	14
TR17321|c0_g1_i1	16
TR17327|c0_g1_i2	26
TR17329|c0_g1_i1	44
TR17330|c0_g1_i3	122
TR17332|c1_g1_i2	20
TR17336|c0_g1_i1	26
TR17340|c0_g2_i1	40
TR17354|c0_g1_i1	40
TR17357|c0_g1_i1	30
TR17361|c0_g1_i1	3746
TR17363|c0_g1_i1	16
TR17364|c0_g1_i2	174
TR17366|c0_g1_i1	20
TR17375|c0_g1_i1	16
TR17385|c0_g1_i1	22
TR1739|c0_g1_i1	64
TR17404|c0_g1_i1	14
TR17408|c0_g1_i1	16
TR17409|c0_g1_i1	14
TR17415|c0_g1_i1	32
TR17420|c0_g1_i1	78
TR17422|c0_g1_i2	52
TR17427|c0_g2_i1	48
TR17442|c0_g1_i1	36
TR17451|c0_g1_i1	28
TR17454|c0_g1_i3	32
TR17455|c0_g2_i1	12
TR17459|c0_g1_i1	106
TR17462|c0_g1_i3	16
TR17465|c0_g1_i1	18
TR17470|c0_g1_i1	42
TR1748|c0_g3_i1	16
TR17480|c0_g1_i2	12
TR17481|c0_g1_i1	12
TR17485|c0_g1_i1	26
TR17490|c0_g1_i1	16
TR17505|c0_g1_i1	20
TR1751|c0_g1_i2	32
TR17528|c0_g2_i1	24
TR1754|c0_g1_i2	58
TR1754|c0_g1_i3	48
TR17541|c0_g1_i1	26
TR17551|c0_g1_i1	12
TR17553|c0_g2_i1	46
TR1756|c0_g3_i1	16
TR17566|c0_g1_i1	18
TR17589|c0_g2_i1	26
TR17594|c0_g1_i1	16
TR17595|c0_g1_i2	18
TR17599|c0_g1_i1	16
TR17601|c0_g1_i1	16
TR17604|c0_g1_i1	26
TR17627|c0_g1_i1	18
TR17630|c0_g1_i1	20
TR17643|c0_g1_i1	24
TR17652|c0_g1_i1	14
TR17657|c0_g1_i1	94
TR17661|c0_g1_i1	42
TR17674|c0_g2_i1	46
TR17675|c0_g1_i1	20
TR17678|c0_g1_i1	18
TR17681|c0_g1_i1	12
TR17694|c0_g1_i1	14
TR17713|c0_g1_i1	12
TR17715|c0_g1_i1	28
TR17719|c1_g1_i1	26
TR17732|c0_g1_i1	12
TR17732|c1_g1_i1	20
TR17733|c0_g2_i1	64
TR1774|c0_g1_i1	38
TR17742|c0_g1_i1	36
TR17751|c0_g1_i1	28
TR17753|c0_g1_i1	14
TR17754|c0_g1_i1	18
TR17761|c0_g1_i1	70
TR17770|c0_g1_i1	32
TR17771|c0_g1_i1	22
TR17780|c0_g1_i1	44
TR17784|c0_g1_i1	18
TR17788|c0_g1_i1	22
TR17792|c0_g1_i1	20
TR17797|c0_g2_i1	20
TR17798|c0_g1_i1	18
TR17799|c0_g1_i1	20
TR17802|c0_g1_i1	22
TR17804|c0_g1_i1	18
TR17805|c0_g2_i1	20
TR17806|c0_g1_i1	52
TR17807|c1_g1_i1	22
TR17808|c0_g1_i1	22
TR17812|c0_g2_i1	28
TR17817|c0_g1_i1	30
TR17817|c0_g2_i1	16
TR17835|c0_g1_i2	48
TR1784|c0_g1_i1	18
TR17841|c0_g1_i2	80
TR17844|c0_g1_i1	60
TR17848|c0_g2_i1	18
TR17851|c0_g1_i1	54
TR17852|c0_g1_i1	12
TR17859|c1_g1_i1	880
TR17874|c1_g1_i1	22
TR17880|c0_g1_i1	66
TR17883|c0_g1_i2	132
TR17883|c0_g1_i4	136
TR17903|c0_g1_i1	26
TR17910|c0_g1_i1	22
TR17916|c0_g3_i1	20
TR17917|c0_g1_i1	36
TR17925|c0_g1_i1	32
TR17929|c0_g1_i1	48
TR17934|c0_g1_i2	12
TR17940|c0_g2_i2	52
TR17944|c0_g2_i1	20
TR17945|c0_g2_i1	58
TR17945|c0_g3_i1	88
TR17945|c0_g4_i1	34
TR17952|c0_g2_i1	24
TR17964|c0_g1_i1	20
TR17965|c1_g1_i1	12
TR17966|c0_g1_i2	100
TR17970|c0_g1_i1	22
TR17973|c0_g1_i2	20
TR17989|c0_g2_i1	22
TR17995|c0_g1_i1	34
TR17996|c0_g1_i1	40
TR17996|c0_g1_i2	86
TR17996|c0_g1_i3	30
TR18007|c0_g1_i1	16
TR18007|c0_g3_i1	34
TR18017|c0_g1_i1	90
TR18028|c1_g2_i1	24
TR18035|c0_g1_i1	12
TR18037|c0_g1_i1	34
TR1804|c0_g3_i2	64
TR18046|c0_g4_i1	26
TR18047|c0_g1_i1	34
TR18048|c0_g1_i1	30
TR18049|c0_g1_i1	106
TR18053|c0_g1_i2	12
TR18054|c0_g1_i1	18
TR18062|c0_g1_i1	36
TR18065|c0_g1_i1	12
TR18090|c0_g1_i1	30
TR18100|c0_g1_i1	148
TR18100|c0_g2_i1	76
TR18107|c0_g1_i1	42
TR18108|c0_g1_i2	18
TR18109|c0_g3_i1	22
TR18109|c0_g3_i2	46
TR18110|c0_g1_i1	28
TR18115|c0_g1_i1	20
TR18128|c0_g1_i1	14
TR18131|c0_g2_i1	22
TR18144|c1_g1_i1	308
TR18147|c0_g1_i1	22
TR18155|c0_g1_i1	16
TR18157|c0_g1_i1	56
TR18159|c0_g2_i1	66
TR18164|c0_g1_i1	16
TR18200|c0_g2_i1	60
TR18205|c0_g1_i1	46
TR18235|c0_g1_i1	26
TR18236|c0_g1_i1	56
TR18246|c1_g1_i1	14
TR18261|c0_g2_i1	20
TR18262|c0_g1_i1	14
TR18263|c0_g1_i1	126
TR18273|c0_g2_i1	46
TR18281|c0_g1_i1	58
TR18288|c0_g2_i1	48
TR18289|c0_g1_i2	20
TR1829|c0_g1_i1	16
TR18292|c0_g1_i2	52
TR18293|c0_g1_i1	58
TR18317|c0_g1_i1	20
TR18317|c1_g1_i1	34
TR18322|c0_g1_i1	26
TR18328|c0_g1_i2	22
TR18329|c0_g1_i1	94
TR18337|c0_g1_i1	28
TR1834|c0_g3_i1	34
TR1834|c0_g5_i1	16
TR18341|c0_g1_i2	32
TR18355|c0_g1_i1	26
TR18366|c0_g1_i2	60
TR18379|c0_g1_i2	34
TR18392|c0_g1_i1	22
TR18395|c0_g1_i4	106
TR18395|c0_g1_i5	18
TR18403|c0_g1_i1	16
TR18405|c0_g2_i1	28
TR18409|c0_g1_i1	22
TR18416|c0_g1_i1	20
TR18416|c0_g1_i2	20
TR18419|c0_g1_i1	60
TR18440|c0_g1_i1	32
TR18440|c0_g2_i2	24
TR18451|c0_g1_i1	14
TR18453|c0_g1_i1	130
TR18453|c0_g1_i2	84
TR18455|c0_g1_i1	12
TR1846|c0_g1_i1	26
TR18466|c0_g1_i1	32
TR1847|c0_g1_i1	42
TR18472|c0_g1_i2	18
TR18473|c0_g2_i1	48
TR18474|c0_g1_i3	22
TR18475|c0_g2_i1	14
TR18478|c1_g1_i1	54
TR18478|c1_g1_i2	44
TR18482|c0_g1_i1	70
TR18488|c0_g1_i1	24
TR18490|c0_g1_i1	16
TR18490|c0_g2_i1	14
TR18490|c0_g2_i2	16
TR18493|c0_g1_i1	20
TR18498|c0_g1_i1	16
TR18506|c0_g1_i1	24
TR18508|c0_g1_i1	12
TR18528|c0_g1_i1	22
TR18530|c0_g1_i1	14
TR18539|c0_g1_i1	34
TR18542|c0_g3_i1	24
TR18548|c0_g1_i1	58
TR18550|c0_g1_i1	10
TR18564|c0_g1_i1	20
TR18567|c0_g1_i1	16
TR18575|c0_g1_i1	46
TR18575|c0_g1_i2	36
TR18575|c0_g1_i3	68
TR18581|c0_g3_i1	28
TR18584|c0_g1_i1	100
TR18589|c0_g1_i2	20
TR18593|c0_g2_i1	14
TR18607|c0_g1_i3	34
TR18613|c0_g2_i1	46
TR18622|c0_g1_i1	14
TR18625|c0_g1_i1	32
TR18627|c0_g1_i1	46
TR18634|c0_g1_i1	34
TR18636|c0_g2_i1	32
TR18647|c0_g1_i1	28
TR18649|c0_g1_i1	20
TR18650|c0_g2_i1	28
TR18650|c0_g4_i1	26
TR18658|c0_g1_i2	88
TR18667|c0_g1_i3	26
TR1867|c0_g1_i1	18
TR18678|c0_g2_i1	18
TR18697|c0_g1_i1	40
TR18699|c1_g1_i1	26
TR18709|c0_g1_i1	44
TR18713|c0_g1_i1	14
TR18714|c0_g1_i1	10
TR18715|c0_g1_i1	14
TR18720|c0_g1_i1	24
TR18731|c0_g1_i1	548
TR18733|c0_g1_i1	14
TR18736|c0_g1_i1	32
TR18745|c0_g1_i1	56
TR18752|c0_g1_i1	22
TR18755|c0_g1_i2	16
TR18758|c0_g1_i1	286
TR18760|c0_g1_i1	44
TR18765|c0_g1_i1	22
TR18781|c0_g1_i1	28
TR18788|c0_g1_i1	56
TR18790|c0_g2_i1	84
TR18790|c0_g3_i1	52
TR18792|c0_g1_i1	50
TR18792|c1_g1_i1	44
TR18794|c0_g1_i1	18
TR18798|c0_g1_i1	314
TR18798|c0_g2_i1	1266
TR188|c0_g1_i1	26
TR188|c0_g2_i1	60
TR18802|c0_g1_i1	34
TR18814|c0_g2_i1	14
TR18818|c0_g1_i1	58
TR18818|c0_g2_i1	92
TR18820|c0_g1_i1	12
TR18846|c1_g1_i1	60
TR18849|c0_g2_i1	98
TR18853|c0_g1_i1	18
TR18859|c2_g2_i1	18
TR18864|c0_g1_i1	20
TR18865|c0_g1_i1	48
TR18865|c0_g1_i2	86
TR18866|c0_g1_i1	12
TR18867|c0_g1_i1	192
TR18882|c0_g1_i1	18
TR18883|c1_g1_i1	28
TR18899|c0_g1_i1	30
TR18899|c0_g1_i2	70
TR18902|c0_g1_i1	34
TR18904|c0_g1_i2	20
TR18905|c0_g3_i1	58
TR1891|c0_g1_i1	24
TR1891|c0_g2_i1	36
TR18917|c0_g2_i1	90
TR1892|c0_g1_i1	52
TR18923|c0_g1_i1	22
TR1893|c0_g1_i1	154
TR18934|c0_g1_i1	18
TR18937|c0_g1_i1	34
TR18938|c0_g1_i1	22
TR18943|c0_g1_i1	20
TR18953|c0_g1_i1	18
TR18957|c0_g1_i1	22
TR18985|c0_g1_i1	34
TR18996|c0_g1_i1	14
TR1900|c0_g1_i2	28
TR19001|c0_g1_i1	10
TR19001|c0_g2_i1	18
TR19009|c0_g1_i1	22
TR19013|c0_g1_i1	20
TR19017|c0_g1_i1	64
TR19018|c0_g1_i2	26
TR19025|c0_g1_i1	432
TR19033|c0_g1_i1	24
TR19033|c0_g1_i2	38
TR19041|c0_g1_i2	20
TR19043|c0_g1_i1	32
TR19050|c0_g1_i1	38
TR19053|c0_g1_i1	20
TR19058|c0_g1_i1	66
TR19066|c0_g1_i1	28
TR19068|c0_g1_i1	22
TR19074|c0_g1_i1	16
TR19075|c0_g1_i1	20
TR19077|c0_g1_i1	250
TR19080|c1_g3_i1	18
TR19081|c0_g2_i1	20
TR19099|c0_g1_i1	22
TR191|c1_g1_i1	16
TR1910|c0_g1_i1	16
TR19103|c0_g1_i1	22
TR19106|c0_g1_i1	22
TR19108|c0_g2_i1	60
TR1911|c0_g1_i1	22
TR1911|c0_g2_i1	34
TR19116|c0_g1_i1	54
TR1912|c0_g2_i1	12
TR19121|c0_g1_i1	26
TR19121|c0_g1_i2	30
TR19125|c0_g1_i2	26
TR19133|c0_g1_i2	28
TR19133|c0_g1_i4	58
TR19137|c0_g1_i3	198
TR19138|c0_g1_i2	122
TR19141|c0_g1_i1	30
TR1915|c0_g1_i1	52
TR19162|c1_g1_i3	38
TR19162|c1_g1_i4	60
TR19167|c0_g1_i2	36
TR1917|c0_g2_i1	100
TR19175|c0_g1_i4	14
TR19177|c0_g1_i1	14
TR19186|c0_g1_i2	44
TR19186|c0_g1_i3	34
TR19190|c0_g1_i1	36
TR19196|c0_g1_i1	30
TR19205|c0_g1_i1	44
TR19205|c0_g2_i1	78
TR19214|c0_g1_i1	28
TR19216|c0_g1_i1	22
TR19216|c0_g2_i1	30
TR19217|c0_g1_i1	24
TR19217|c0_g1_i2	22
TR19226|c0_g1_i1	20
TR19230|c0_g1_i1	12
TR19231|c0_g1_i1	336
TR19233|c0_g1_i1	20
TR19243|c0_g1_i1	26
TR19245|c0_g1_i2	12
TR19245|c0_g1_i3	16
TR19259|c0_g1_i1	10
TR1926|c0_g1_i2	32
TR19264|c0_g1_i1	18
TR19287|c0_g1_i1	14
TR1929|c0_g1_i1	26
TR19293|c0_g1_i1	18
TR19294|c0_g2_i1	16
TR19300|c0_g2_i2	38
TR19312|c0_g2_i1	16
TR19318|c1_g1_i2	22
TR19328|c0_g1_i1	54
TR19328|c0_g2_i1	42
TR19329|c0_g1_i1	18
TR19330|c0_g1_i1	32
TR19335|c0_g1_i2	50
TR19335|c0_g1_i3	46
TR19344|c1_g1_i1	16
TR19345|c0_g1_i1	12
TR19354|c0_g1_i3	20
TR19356|c0_g1_i1	18
TR19356|c0_g2_i1	70
TR19359|c0_g1_i1	12
TR1936|c0_g1_i1	14
TR19362|c0_g1_i1	16
TR19364|c0_g1_i1	14
TR1937|c0_g1_i2	16
TR1937|c0_g1_i3	26
TR19371|c0_g3_i2	10
TR19375|c0_g1_i1	18
TR19382|c0_g1_i3	14
TR19383|c0_g1_i1	38
TR19395|c0_g1_i2	24
TR19395|c0_g1_i3	34
TR19399|c0_g1_i1	130
TR19399|c0_g2_i1	208
TR19402|c0_g1_i1	18
TR19414|c0_g1_i1	18
TR1942|c0_g2_i1	38
TR1942|c0_g2_i2	28
TR19425|c0_g3_i1	24
TR19436|c0_g1_i1	62
TR19450|c0_g2_i1	90
TR19450|c0_g2_i2	76
TR19454|c0_g2_i1	14
TR19455|c0_g1_i1	14
TR19462|c0_g2_i1	20
TR19465|c0_g1_i1	40
TR19465|c0_g1_i4	30
TR19469|c1_g1_i1	20
TR19472|c0_g1_i1	60
TR19486|c0_g1_i2	210
TR19494|c0_g1_i1	14
TR19497|c0_g1_i1	22
TR19497|c0_g1_i2	14
TR19518|c0_g4_i1	16
TR19523|c0_g1_i1	152
TR19523|c0_g1_i2	160
TR19535|c0_g1_i1	40
TR19536|c0_g1_i1	3512
TR19540|c0_g1_i1	84
TR19543|c0_g1_i1	290
TR19547|c0_g1_i1	282
TR19547|c2_g1_i2	164
TR19547|c2_g1_i3	628
TR19554|c0_g1_i1	18
TR19559|c0_g3_i1	18
TR1956|c0_g1_i1	24
TR19561|c0_g1_i2	68
TR19570|c0_g1_i2	22
TR19572|c0_g1_i2	22
TR19575|c0_g1_i1	44
TR19586|c0_g1_i2	24
TR19590|c0_g1_i1	28
TR19598|c0_g1_i4	44
TR19603|c0_g1_i1	30
TR19611|c0_g2_i1	24
TR19611|c0_g3_i1	34
TR19612|c0_g1_i1	30
TR19616|c0_g2_i2	26
TR1962|c0_g1_i1	68
TR19626|c0_g1_i1	220
TR19626|c0_g1_i2	116
TR19631|c0_g1_i1	14
TR19639|c0_g1_i1	52
TR19640|c0_g1_i1	32
TR19645|c0_g1_i1	12
TR19646|c0_g1_i2	94
TR19647|c0_g1_i1	18
TR19648|c0_g1_i1	32
TR19648|c0_g2_i1	38
TR19656|c0_g3_i1	34
TR19659|c0_g1_i1	32
TR19667|c0_g2_i1	44
TR1968|c0_g1_i2	10
TR19681|c0_g1_i1	18
TR19683|c0_g1_i1	30
TR19689|c0_g1_i1	16
TR1969|c0_g1_i1	12
TR19691|c0_g2_i1	14
TR19695|c0_g1_i2	20
TR19698|c0_g1_i1	24
TR1970|c0_g1_i1	16
TR19703|c0_g1_i1	14
TR1971|c0_g1_i1	18
TR19714|c0_g1_i3	40
TR19718|c0_g1_i1	50
TR19719|c0_g1_i2	24
TR1972|c0_g1_i4	30
TR19726|c0_g1_i2	38
TR19726|c0_g1_i6	26
TR19728|c0_g1_i1	18
TR19728|c0_g2_i1	62
TR19729|c0_g1_i2	18
TR19741|c1_g1_i1	24
TR19742|c0_g1_i1	16
TR19743|c0_g1_i1	42
TR19744|c0_g1_i1	26
TR19744|c0_g1_i2	148
TR19744|c0_g1_i3	154
TR19753|c0_g1_i2	20
TR19767|c0_g1_i2	48
TR19768|c1_g1_i2	236
TR19768|c1_g1_i3	316
TR19768|c1_g1_i4	300
TR19768|c1_g1_i5	102
TR19771|c0_g1_i1	30
TR19774|c0_g1_i1	24
TR19779|c0_g1_i1	22
TR19781|c0_g1_i1	14
TR1979|c0_g1_i1	20
TR19791|c0_g1_i1	28
TR19797|c0_g1_i1	58
TR19841|c0_g1_i1	202
TR19847|c0_g1_i1	14
TR19854|c0_g1_i1	10
TR19856|c0_g1_i3	12
TR19860|c0_g1_i1	12
TR19863|c0_g1_i1	26
TR19863|c1_g1_i1	38
TR19864|c0_g1_i2	14
TR19867|c0_g1_i2	24
TR19867|c0_g1_i4	28
TR19872|c0_g2_i1	34
TR19872|c1_g1_i1	24
TR19895|c1_g2_i1	18
TR19895|c1_g3_i1	64
TR19898|c0_g1_i1	20
TR19904|c0_g1_i3	78
TR19904|c0_g1_i4	72
TR19905|c0_g1_i1	18
TR19908|c0_g1_i1	36
TR19908|c1_g2_i1	48
TR19910|c0_g1_i1	36
TR19913|c0_g1_i1	30
TR19915|c0_g1_i1	30
TR19920|c0_g1_i1	26
TR19924|c0_g1_i1	48
TR19925|c0_g1_i2	24
TR19928|c0_g1_i1	26
TR19955|c1_g1_i1	16
TR19958|c0_g1_i2	42
TR19958|c0_g2_i1	24
TR19966|c0_g1_i1	26
TR19967|c1_g2_i1	14
TR19967|c1_g2_i2	26
TR19968|c0_g1_i2	18
TR1997|c0_g1_i2	38
TR19971|c0_g1_i1	22
TR19980|c0_g1_i1	12
TR19983|c0_g1_i1	42
TR19989|c0_g1_i1	14
TR19994|c0_g1_i1	12
TR19996|c0_g1_i3	62
TR19997|c0_g1_i1	22
TR19997|c0_g3_i2	112
TR20003|c0_g1_i1	16
TR20008|c0_g1_i1	100
TR20009|c0_g1_i1	14
TR20016|c0_g2_i1	12
TR20023|c0_g1_i1	54
TR20023|c0_g1_i2	66
TR20036|c0_g1_i1	26
TR20037|c0_g1_i1	16
TR20044|c0_g1_i1	20
TR20044|c0_g1_i2	24
TR20046|c0_g4_i1	34
TR20062|c0_g1_i1	14
TR20063|c0_g1_i2	34
TR20063|c0_g1_i5	26
TR20068|c0_g2_i1	90
TR20070|c0_g1_i2	486
TR20072|c0_g1_i2	18
TR20077|c0_g1_i1	28
TR20077|c0_g1_i2	46
TR20079|c0_g1_i1	20
TR20081|c0_g1_i1	44
TR20082|c0_g1_i1	26
TR20086|c0_g1_i2	28
TR20090|c0_g2_i2	36
TR20092|c0_g1_i1	12
TR20094|c0_g1_i1	32
TR20094|c0_g1_i2	32
TR20094|c0_g1_i3	22
TR20094|c0_g1_i4	42
TR20098|c0_g1_i1	22
TR20106|c0_g1_i1	22
TR2011|c0_g2_i1	64
TR20112|c0_g1_i1	106
TR20119|c0_g1_i1	40
TR20119|c0_g1_i2	84
TR20119|c0_g1_i3	56
TR20119|c0_g1_i4	52
TR20119|c1_g1_i1	34
TR20120|c0_g1_i1	64
TR20122|c0_g1_i1	124
TR20124|c1_g1_i2	66
TR20126|c0_g1_i2	38
TR20133|c0_g1_i2	32
TR20134|c0_g3_i1	20
TR20142|c0_g1_i1	16
TR20146|c0_g1_i1	14
TR20149|c0_g2_i2	16
TR20150|c0_g1_i1	132
TR20150|c0_g1_i3	78
TR20151|c0_g1_i2	34
TR20158|c0_g1_i1	50
TR20176|c0_g1_i1	24
TR20183|c1_g3_i1	16
TR20189|c0_g1_i1	42
TR20199|c0_g1_i1	24
TR2020|c0_g1_i1	26
TR20202|c0_g3_i1	32
TR20207|c0_g1_i4	36
TR20214|c0_g1_i2	24
TR20214|c0_g1_i3	28
TR2022|c0_g1_i1	24
TR20239|c0_g1_i1	28
TR2024|c0_g1_i1	22
TR20242|c0_g1_i1	104
TR20242|c0_g1_i2	22
TR20242|c0_g2_i1	26
TR20249|c0_g1_i1	44
TR20252|c1_g1_i1	18
TR20253|c0_g1_i1	12
TR20258|c0_g1_i1	10
TR20258|c0_g2_i1	28
TR2026|c0_g2_i1	64
TR20263|c0_g1_i1	48
TR20272|c0_g1_i1	28
TR20282|c0_g1_i1	16
TR20298|c0_g1_i1	16
TR20298|c0_g1_i2	22
TR20305|c0_g1_i1	24
TR20307|c0_g1_i1	52
TR20307|c0_g1_i2	94
TR20308|c0_g1_i2	28
TR20313|c0_g1_i4	436
TR20319|c1_g1_i1	24
TR20324|c0_g1_i1	18
TR20329|c0_g2_i1	20
TR20334|c0_g1_i1	22
TR20336|c0_g1_i2	186
TR20337|c0_g2_i1	14
TR20345|c0_g1_i1	18
TR20350|c0_g1_i1	166
TR20355|c0_g1_i1	230
TR20355|c0_g1_i3	216
TR20355|c0_g1_i4	96
TR20364|c0_g2_i1	30
TR20372|c0_g1_i1	18
TR20378|c0_g1_i3	22
TR20379|c0_g1_i1	30
TR20381|c0_g1_i3	20
TR20382|c0_g1_i1	36
TR20385|c0_g3_i1	10
TR20389|c0_g2_i1	14
TR20393|c0_g2_i1	94
TR20397|c0_g1_i1	40
TR20403|c0_g1_i1	22
TR20408|c0_g1_i1	14
TR20411|c0_g1_i1	16
TR20421|c1_g2_i1	18
TR20427|c0_g1_i1	30
TR20432|c0_g1_i2	104
TR20434|c0_g1_i2	76
TR20438|c0_g1_i1	16
TR20444|c0_g1_i1	12
TR20448|c0_g1_i1	56
TR20451|c0_g1_i1	76
TR20453|c0_g1_i2	20
TR20459|c0_g1_i1	30
TR20469|c0_g2_i1	20
TR20485|c0_g1_i1	18
TR20493|c0_g1_i2	20
TR20499|c0_g1_i1	26
TR20510|c0_g1_i1	26
TR20523|c0_g1_i1	38
TR20523|c1_g1_i1	36
TR20525|c1_g1_i1	54
TR20525|c1_g2_i1	24
TR20527|c1_g1_i1	86
TR20554|c0_g1_i3	28
TR20560|c0_g1_i1	10
TR20581|c0_g1_i1	26
TR20586|c0_g1_i1	92
TR20590|c0_g1_i1	30
TR20593|c0_g1_i2	20
TR20595|c0_g1_i1	22
TR20596|c0_g1_i3	22
TR20605|c0_g1_i1	26
TR20606|c0_g1_i1	14
TR20606|c1_g1_i1	40
TR20608|c0_g1_i2	20
TR20609|c0_g1_i1	16
TR20642|c0_g1_i1	18
TR2066|c0_g1_i1	120
TR20665|c0_g1_i1	5622
TR2067|c0_g1_i1	74
TR20670|c0_g1_i3	26
TR20671|c0_g2_i1	28
TR20691|c0_g2_i1	18
TR20695|c0_g1_i1	48
TR20699|c0_g1_i1	150
TR20700|c0_g1_i1	58
TR20704|c0_g1_i3	500
TR20704|c0_g2_i1	464
TR20707|c0_g1_i1	20
TR20711|c0_g2_i1	20
TR20714|c0_g1_i1	56
TR20714|c0_g1_i3	52
TR20714|c0_g1_i5	32
TR20720|c0_g1_i1	12
TR20745|c0_g1_i2	44
TR20749|c0_g1_i4	50
TR20749|c0_g2_i1	24
TR20766|c0_g1_i1	22
TR20767|c1_g1_i1	30
TR20780|c0_g1_i1	16
TR20783|c0_g2_i1	22
TR20786|c0_g1_i1	16
TR20794|c0_g1_i1	18
TR20795|c0_g1_i1	16
TR20798|c0_g1_i1	32
TR2080|c0_g1_i1	32
TR20812|c0_g1_i1	604
TR20812|c2_g1_i1	1418
TR20824|c0_g1_i1	38
TR20825|c0_g1_i3	24
TR20833|c0_g1_i3	118
TR20842|c0_g1_i4	26
TR20845|c0_g2_i1	20
TR20847|c0_g2_i2	16
TR20849|c0_g1_i2	80
TR2085|c0_g2_i1	10
TR20850|c0_g1_i2	22
TR20855|c0_g2_i2	38
TR20858|c0_g3_i1	20
TR20861|c0_g1_i2	36
TR20861|c0_g2_i1	18
TR20873|c0_g2_i2	44
TR20875|c0_g2_i1	18
TR20876|c0_g1_i1	12
TR20876|c1_g1_i3	22
TR20877|c0_g1_i1	128
TR20879|c0_g2_i1	68
TR20882|c0_g1_i1	34
TR20883|c0_g2_i1	30
TR20883|c0_g3_i1	112
TR20883|c0_g3_i4	68
TR20884|c0_g1_i1	20
TR20886|c0_g1_i1	18
TR20894|c0_g1_i2	54
TR20896|c0_g1_i1	18
TR20899|c0_g2_i1	66
TR20901|c1_g1_i1	14
TR20903|c0_g1_i4	68
TR20908|c0_g1_i1	16
TR20919|c0_g1_i2	228
TR2092|c0_g1_i1	284
TR20923|c0_g1_i1	24
TR20924|c0_g1_i3	26
TR20926|c0_g2_i1	22
TR20931|c1_g1_i4	32
TR20932|c0_g1_i2	80
TR20936|c0_g1_i1	22
TR20937|c0_g2_i1	14
TR2094|c0_g2_i1	336
TR20942|c0_g1_i1	58
TR20947|c0_g1_i1	16
TR20948|c0_g1_i1	34
TR20971|c1_g1_i1	16
TR20979|c1_g2_i1	10
TR20982|c2_g1_i1	16
TR20983|c0_g1_i1	28
TR20987|c0_g1_i3	24
TR20993|c0_g1_i1	38
TR21001|c0_g1_i1	92
TR21001|c0_g1_i4	440
TR21006|c0_g1_i1	32
TR21007|c0_g1_i1	20
TR21015|c0_g1_i1	14
TR21019|c0_g1_i1	24
TR2102|c0_g1_i2	28
TR21021|c1_g1_i2	32
TR21022|c0_g1_i2	20
TR21025|c0_g1_i1	12
TR21026|c0_g1_i1	64
TR21035|c0_g1_i1	18
TR21035|c1_g1_i1	18
TR21037|c0_g2_i1	26
TR21041|c0_g2_i1	20
TR21042|c0_g1_i2	56
TR21042|c0_g1_i3	20
TR21042|c0_g1_i4	16
TR21043|c1_g1_i1	70
TR21048|c0_g1_i1	18
TR2105|c0_g1_i3	30
TR21052|c0_g2_i1	126
TR21052|c0_g2_i3	102
TR21052|c0_g2_i4	116
TR21052|c0_g3_i1	84
TR21053|c1_g1_i7	52
TR21053|c1_g1_i8	28
TR21056|c0_g1_i1	34
TR21087|c0_g2_i1	10
TR21088|c0_g1_i3	28
TR21095|c0_g1_i2	18
TR21099|c0_g1_i1	46
TR21101|c0_g1_i2	64
TR21102|c0_g1_i1	18
TR21106|c0_g1_i4	20
TR21116|c0_g1_i3	26
TR21117|c0_g1_i1	18
TR21122|c0_g1_i3	24
TR21124|c0_g2_i2	54
TR21127|c0_g1_i1	26
TR21134|c0_g1_i2	26
TR21139|c0_g1_i1	22
TR21143|c0_g2_i2	20
TR21144|c0_g2_i2	40
TR21146|c0_g1_i1	18
TR21150|c0_g1_i2	74
TR21151|c0_g2_i1	16
TR21154|c0_g1_i1	52
TR21154|c1_g2_i1	44
TR21154|c1_g3_i1	36
TR21155|c0_g1_i1	24
TR21156|c0_g3_i1	24
TR21161|c0_g1_i1	108
TR21161|c0_g2_i1	28
TR21162|c0_g1_i1	32
TR21166|c0_g1_i1	30
TR21176|c0_g1_i1	112
TR21176|c0_g3_i1	168
TR21182|c0_g1_i1	32
TR21186|c0_g1_i1	110
TR21189|c0_g1_i1	42
TR21193|c0_g1_i1	18
TR21196|c0_g1_i1	20
TR21199|c0_g2_i1	28
TR212|c0_g1_i1	44
TR21201|c0_g1_i1	16
TR21218|c0_g1_i1	22
TR21220|c0_g1_i2	38
TR21224|c0_g1_i1	46
TR21225|c0_g1_i1	24
TR21231|c0_g1_i1	56
TR21242|c0_g1_i1	30
TR21246|c0_g2_i2	24
TR21247|c0_g2_i1	14
TR21253|c0_g2_i1	16
TR21256|c0_g1_i2	34
TR2126|c1_g1_i1	120
TR21260|c0_g1_i1	28
TR21263|c0_g2_i1	36
TR21263|c0_g3_i1	30
TR21267|c0_g3_i1	14
TR21276|c0_g1_i2	66
TR21286|c0_g1_i1	24
TR21291|c0_g2_i3	14
TR21300|c0_g1_i2	48
TR21301|c0_g1_i3	16
TR21317|c0_g1_i1	30
TR21317|c0_g3_i1	62
TR21319|c0_g1_i1	132
TR2132|c0_g1_i1	32
TR21329|c0_g4_i2	14
TR21333|c0_g2_i1	14
TR21335|c0_g1_i1	22
TR21338|c0_g1_i1	12
TR21343|c0_g1_i3	16
TR21343|c0_g1_i4	20
TR21343|c0_g2_i1	16
TR21351|c0_g1_i1	16
TR21352|c0_g1_i1	20
TR21354|c1_g1_i2	18
TR21358|c2_g1_i1	36
TR21365|c0_g1_i2	84
TR21366|c0_g1_i1	40
TR21368|c0_g1_i1	104
TR21370|c0_g1_i1	334
TR21373|c0_g1_i1	18
TR21374|c0_g1_i2	94
TR21374|c0_g2_i1	44
TR21377|c0_g1_i1	66
TR21382|c0_g1_i1	14
TR21383|c0_g3_i1	20
TR21385|c0_g2_i1	254
TR21386|c0_g4_i1	46
TR21387|c0_g1_i1	16
TR21389|c0_g1_i3	48
TR2139|c0_g1_i1	12
TR21394|c0_g1_i1	14
TR21396|c0_g1_i1	26
TR21397|c0_g1_i3	66
TR21397|c0_g2_i1	20
TR21398|c0_g1_i1	12
TR21400|c0_g1_i6	48
TR21403|c0_g1_i4	14
TR21407|c0_g1_i1	28
TR21412|c0_g1_i2	24
TR21415|c0_g1_i2	22
TR21426|c0_g1_i3	32
TR21426|c0_g1_i4	14
TR21430|c0_g1_i2	28
TR21431|c0_g1_i3	14
TR21432|c0_g1_i4	18
TR21444|c0_g1_i1	54
TR21453|c0_g1_i2	12
TR21453|c2_g1_i1	30
TR21457|c0_g1_i1	52
TR21464|c0_g1_i2	22
TR21467|c0_g1_i1	16
TR21470|c0_g1_i1	16
TR21473|c0_g1_i1	1018
TR21478|c0_g1_i1	28
TR2148|c0_g1_i1	12
TR21496|c1_g4_i1	42
TR21499|c0_g1_i2	58
TR21504|c0_g1_i1	18
TR21504|c0_g2_i1	16
TR21510|c0_g1_i1	74
TR21514|c0_g1_i1	50
TR21527|c1_g1_i2	28
TR21529|c0_g1_i1	80
TR21529|c0_g1_i3	490
TR21529|c0_g1_i7	548
TR21545|c0_g1_i2	40
TR21548|c0_g1_i2	12
TR21562|c0_g1_i1	14
TR21570|c0_g1_i1	32
TR21572|c0_g1_i1	58
TR2158|c0_g1_i3	44
TR2158|c0_g1_i4	34
TR21584|c0_g2_i1	104
TR21597|c0_g1_i1	38
TR21604|c0_g1_i1	36
TR21617|c0_g1_i1	24
TR2162|c0_g1_i1	82
TR2162|c0_g1_i4	194
TR2162|c0_g1_i5	160
TR2162|c0_g1_i6	84
TR21620|c0_g1_i1	28
TR21624|c0_g1_i1	114
TR21624|c0_g1_i2	82
TR21624|c0_g1_i4	124
TR21625|c0_g1_i3	22
TR21629|c0_g1_i1	64
TR21629|c0_g1_i2	52
TR21637|c0_g1_i3	50
TR21637|c0_g1_i4	60
TR21638|c0_g1_i4	20
TR21641|c0_g1_i2	14
TR21642|c0_g1_i1	58
TR2165|c0_g2_i2	36
TR2166|c0_g2_i2	14
TR21666|c0_g1_i1	22
TR21666|c0_g1_i2	20
TR21667|c0_g1_i1	22
TR21668|c0_g2_i1	22
TR21672|c1_g2_i1	14
TR21676|c0_g1_i1	32
TR21680|c0_g1_i1	34
TR21683|c2_g1_i1	1660
TR21686|c0_g2_i1	14
TR2169|c0_g6_i1	24
TR2170|c1_g2_i1	36
TR2170|c1_g4_i1	528
TR21700|c0_g1_i1	18
TR21701|c0_g3_i1	18
TR21711|c0_g1_i1	36
TR2172|c0_g2_i10	20
TR2172|c0_g2_i3	58
TR2172|c0_g2_i5	30
TR2172|c0_g2_i6	50
TR2172|c0_g3_i1	20
TR21721|c0_g1_i1	10
TR21722|c1_g1_i1	14
TR21723|c0_g1_i2	22
TR21725|c1_g1_i2	18
TR21728|c0_g1_i2	20
TR2173|c0_g1_i1	76
TR21733|c0_g1_i1	24
TR21736|c0_g1_i1	16
TR2174|c1_g1_i1	28
TR2174|c1_g4_i1	34
TR21741|c0_g1_i1	58
TR21745|c0_g1_i1	22
TR21747|c0_g1_i1	74
TR21747|c0_g2_i1	12
TR21749|c0_g1_i1	26
TR2175|c1_g1_i1	60
TR21752|c1_g1_i2	80
TR21755|c0_g1_i1	46
TR21759|c0_g3_i2	28
TR2176|c0_g1_i9	66
TR2176|c0_g3_i2	36
TR2176|c0_g4_i2	22
TR21766|c0_g2_i1	20
TR21767|c0_g1_i1	42
TR21769|c0_g2_i1	30
TR2177|c0_g1_i4	48
TR21772|c0_g1_i1	16
TR21775|c0_g1_i1	34
TR2178|c1_g1_i2	12
TR2178|c1_g2_i1	10
TR2178|c5_g2_i1	12
TR2178|c6_g2_i1	50
TR2178|c6_g3_i1	76
TR2178|c6_g4_i1	62
TR21783|c1_g1_i3	28
TR21789|c0_g2_i1	18
TR2179|c0_g1_i2	142
TR21790|c0_g1_i1	70
TR21792|c2_g1_i1	22
TR21794|c0_g1_i1	20
TR21796|c0_g1_i1	14
TR21797|c0_g1_i1	20
TR21799|c0_g1_i1	34
TR21799|c0_g1_i2	18
TR2180|c0_g2_i1	14
TR21805|c0_g1_i1	122
TR21809|c0_g1_i1	30
TR21810|c0_g1_i2	16
TR21814|c0_g2_i1	16
TR21814|c0_g2_i2	32
TR21819|c0_g1_i1	24
TR2182|c0_g1_i5	30
TR21821|c0_g1_i1	192
TR21825|c0_g1_i1	48
TR21828|c0_g1_i1	48
TR21829|c0_g1_i1	38
TR2183|c0_g1_i2	120
TR2183|c0_g1_i3	100
TR21833|c0_g1_i1	38
TR2184|c0_g1_i1	64
TR2184|c0_g8_i3	48
TR2184|c0_g8_i4	108
TR2184|c1_g1_i3	18
TR2184|c1_g1_i4	72
TR21842|c0_g1_i2	36
TR21847|c0_g1_i1	36
TR21848|c0_g1_i2	42
TR21848|c0_g1_i3	48
TR2185|c0_g4_i1	18
TR21851|c0_g2_i2	16
TR21856|c0_g3_i1	84
TR2186|c1_g1_i1	36
TR21861|c0_g1_i1	52
TR21863|c0_g1_i1	26
TR21864|c0_g1_i1	32
TR21866|c0_g1_i1	74
TR21866|c0_g2_i1	18
TR21868|c0_g1_i3	32
TR2187|c0_g1_i1	58
TR2187|c0_g1_i11	316
TR2187|c0_g1_i13	160
TR2187|c0_g1_i4	344
TR2187|c0_g1_i6	296
TR2187|c0_g1_i7	174
TR2187|c0_g1_i8	156
TR21874|c0_g2_i1	26
TR21875|c0_g1_i2	24
TR21875|c0_g2_i1	26
TR21879|c0_g3_i1	40
TR21880|c0_g1_i1	26
TR21881|c0_g1_i1	162
TR21881|c0_g4_i1	148
TR21882|c0_g1_i3	206
TR21882|c0_g1_i5	66
TR21883|c0_g1_i1	36
TR21884|c0_g2_i2	18
TR21890|c1_g1_i1	44
TR21890|c1_g1_i2	64
TR21890|c1_g1_i3	60
TR21892|c0_g1_i1	24
TR21898|c0_g1_i1	20
TR2190|c0_g1_i1	268
TR2190|c0_g1_i2	38
TR21904|c0_g1_i1	44
TR21904|c0_g1_i2	36
TR21908|c1_g1_i1	24
TR21912|c0_g1_i2	30
TR21919|c0_g1_i1	18
TR2192|c0_g2_i2	292
TR21926|c0_g1_i1	34
TR21928|c0_g1_i3	32
TR2193|c0_g2_i1	18
TR21931|c0_g1_i1	42
TR21933|c0_g1_i1	30
TR21935|c0_g1_i1	36
TR21939|c0_g2_i1	24
TR21944|c0_g1_i1	14
TR21958|c0_g2_i3	50
TR2196|c0_g2_i1	94
TR21965|c0_g1_i2	50
TR21968|c0_g1_i1	42
TR21968|c0_g2_i1	36
TR21968|c2_g1_i1	18
TR2197|c0_g2_i3	90
TR21975|c0_g2_i1	20
TR21979|c0_g1_i3	84
TR21980|c0_g1_i1	46
TR21991|c0_g2_i2	56
TR21992|c0_g1_i1	38
TR21996|c0_g1_i1	22
TR21997|c1_g1_i2	18
TR2200|c0_g1_i2	60
TR22000|c0_g1_i4	20
TR22004|c0_g1_i1	22
TR22010|c0_g3_i1	12
TR22029|c0_g1_i1	72
TR2203|c1_g1_i1	102
TR22031|c0_g1_i1	54
TR22036|c0_g1_i1	28
TR22037|c0_g1_i1	514
TR22037|c0_g1_i2	156
TR2204|c0_g1_i5	36
TR22041|c0_g1_i1	32
TR22043|c0_g1_i1	172
TR22045|c0_g2_i1	22
TR22049|c0_g1_i3	26
TR2205|c0_g1_i1	870
TR22051|c0_g1_i2	112
TR22052|c0_g1_i2	40
TR22052|c0_g2_i1	14
TR22054|c0_g1_i4	28
TR2206|c0_g1_i3	24
TR22061|c0_g1_i1	34
[truncated: 30,190 more rows]

## Sheet: OBP1_Specific
Transcript ID	OBP1 _Readcount
TR10015|c0_g1_i1	12
TR10043|c0_g1_i1	26
TR1006|c0_g1_i1	20
TR10071|c0_g1_i1	92
TR10091|c0_g1_i1	20
TR10091|c0_g2_i1	20
TR10099|c0_g1_i1	124
TR10099|c0_g2_i1	14
TR10099|c0_g3_i1	282
TR10164|c0_g1_i1	10
TR10168|c0_g1_i1	14
TR10168|c0_g2_i1	40
TR1017|c0_g1_i1	40
TR10187|c0_g1_i1	40
TR10197|c0_g2_i1	52
TR10202|c1_g1_i1	18
TR10215|c0_g1_i1	26
TR10244|c0_g1_i1	42
TR10250|c0_g2_i1	38
TR10261|c0_g1_i1	74
TR10267|c0_g1_i1	84
TR10276|c0_g1_i1	58
TR10300|c0_g1_i1	36
TR10300|c0_g2_i1	66
TR104|c0_g1_i1	16
TR10423|c0_g1_i1	20
TR10424|c0_g2_i1	28
TR10425|c0_g1_i1	80
TR10427|c0_g3_i1	74
TR1043|c0_g3_i1	26
TR10469|c0_g1_i1	26
TR10471|c0_g1_i1	78
TR10473|c0_g1_i1	22
TR10478|c1_g1_i1	36
TR10488|c0_g1_i1	16
TR1049|c0_g2_i1	28
TR10510|c0_g1_i1	34
TR10520|c1_g1_i1	30
TR10529|c0_g1_i1	26
TR10548|c0_g1_i2	16
TR1056|c0_g1_i1	12
TR10561|c1_g1_i1	26
TR10561|c1_g2_i1	32
TR10579|c0_g1_i1	14
TR10615|c0_g1_i4	24
TR10627|c0_g2_i1	50
TR10644|c0_g2_i1	34
TR10644|c1_g1_i1	70
TR10646|c0_g2_i1	34
TR10664|c0_g1_i2	14
TR10676|c0_g2_i1	54
TR10677|c0_g1_i2	18
TR10682|c0_g1_i1	24
TR10688|c0_g1_i1	14
TR10688|c0_g1_i2	38
TR10731|c0_g1_i2	18
TR10738|c0_g1_i1	42
TR10738|c0_g2_i1	94
TR10739|c0_g1_i1	16
TR10757|c0_g2_i1	374
TR10780|c0_g2_i1	14
TR10798|c0_g1_i1	78
TR10799|c0_g1_i1	26
TR1082|c0_g1_i1	26
TR10822|c0_g1_i1	56
TR10853|c0_g1_i1	42
TR10853|c1_g1_i1	34
TR10870|c1_g1_i1	138
TR10870|c2_g1_i1	46
TR10873|c0_g1_i1	274
TR10876|c0_g1_i1	724
TR10879|c0_g1_i1	14
TR10913|c1_g1_i1	30
TR1092|c0_g1_i2	14
TR1092|c1_g1_i1	38
TR10931|c1_g1_i1	14
TR1095|c0_g1_i1	14
TR10955|c0_g2_i1	30
TR10961|c0_g1_i1	28
TR1097|c0_g1_i2	38
TR10974|c0_g1_i1	26
TR10976|c0_g1_i1	10
TR10991|c0_g1_i1	18
TR1100|c0_g1_i1	50
TR11004|c0_g1_i1	92
TR1101|c1_g1_i1	22
TR11039|c0_g1_i1	18
TR11043|c0_g1_i1	22
TR11045|c0_g1_i1	12
TR11049|c0_g1_i1	76
TR11051|c0_g2_i1	16
TR11060|c0_g1_i1	14
TR11092|c0_g1_i1	24
TR11118|c0_g1_i1	18
TR11126|c0_g2_i1	12
TR11131|c0_g2_i1	62
TR11150|c0_g1_i1	20
TR11152|c0_g2_i2	104
TR11167|c0_g1_i1	12
TR11190|c1_g1_i1	42
TR11205|c0_g3_i1	110
TR11206|c1_g1_i1	22
TR11208|c1_g1_i1	30
TR11208|c1_g2_i1	52
TR11255|c0_g1_i1	22
TR11257|c0_g1_i1	30
TR11257|c0_g2_i2	56
TR11261|c0_g1_i1	30
TR11265|c0_g2_i1	18
TR1127|c0_g2_i1	32
TR1129|c0_g1_i2	14
TR11302|c0_g1_i1	24
TR11308|c0_g2_i1	46
TR11312|c0_g1_i1	38
TR11320|c0_g1_i1	12
TR11342|c0_g1_i1	24
TR11360|c0_g2_i1	40
TR11373|c0_g2_i1	28
TR11385|c0_g1_i1	46
TR11397|c0_g1_i1	18
TR11438|c0_g1_i1	40
TR11438|c0_g2_i1	42
TR1145|c0_g1_i1	10
TR11456|c0_g1_i1	16
TR11472|c0_g2_i1	64
TR11476|c0_g1_i1	50
TR11478|c0_g1_i1	54
TR11478|c0_g1_i2	58
TR11500|c0_g1_i1	44
TR11503|c0_g1_i1	50
TR11525|c0_g1_i1	76
TR11527|c0_g1_i1	16
TR11529|c0_g2_i1	20
TR11537|c0_g1_i1	16
TR1156|c0_g1_i1	12
TR11567|c0_g1_i1	28
TR1158|c0_g1_i2	178
TR11599|c1_g1_i1	36
TR11609|c0_g1_i1	38
TR11615|c0_g1_i1	276
TR11635|c0_g1_i1	16
TR11638|c0_g1_i1	42
TR11649|c0_g2_i1	84
TR11650|c0_g1_i1	22
TR11688|c0_g1_i1	14
TR11704|c0_g1_i1	38
TR11704|c0_g2_i1	278
TR11706|c0_g1_i1	20
TR11721|c0_g2_i1	34
TR11728|c0_g1_i1	20
TR11730|c0_g2_i1	30
TR11737|c0_g1_i1	20
TR11742|c0_g1_i1	16
TR11761|c0_g1_i1	28
TR11775|c0_g2_i1	40
TR11775|c0_g3_i1	284
TR11776|c0_g1_i1	56
TR11778|c1_g1_i1	32
TR11782|c0_g1_i1	30
TR11807|c0_g2_i1	14
TR1181|c0_g2_i2	208
TR11841|c0_g1_i1	12
TR11852|c0_g1_i1	48
TR11854|c0_g1_i1	82
TR11871|c0_g1_i1	14
TR11879|c0_g1_i1	36
TR1188|c0_g1_i1	36
TR11901|c0_g3_i1	24
TR11908|c0_g1_i1	12
TR11950|c0_g1_i1	70
TR11950|c0_g1_i2	54
TR11953|c0_g1_i1	32
TR1197|c0_g1_i1	24
TR11971|c0_g1_i1	86
TR12007|c0_g1_i1	24
TR12023|c0_g1_i2	50
TR1203|c0_g1_i1	78
TR12034|c0_g1_i1	14
TR12035|c0_g2_i1	374
TR12042|c0_g1_i1	164
TR12092|c0_g1_i1	22
TR12093|c0_g1_i1	86
TR12093|c0_g2_i1	268
TR1210|c0_g1_i1	20
TR12102|c0_g1_i1	28
TR12115|c0_g1_i1	14
TR1213|c0_g1_i1	82
TR12163|c0_g1_i1	132
TR12196|c0_g1_i1	50
TR1221|c0_g1_i1	12
TR12224|c0_g1_i1	176
TR1223|c0_g1_i1	12
TR12237|c0_g1_i1	134
TR1224|c0_g1_i1	22
TR12258|c0_g1_i1	7760
TR12296|c1_g1_i1	58
TR12298|c0_g1_i1	14
TR12307|c0_g1_i1	476
TR12322|c0_g1_i1	18
TR1233|c0_g1_i1	20
TR12332|c0_g1_i1	16
TR12360|c0_g1_i1	40
TR12375|c0_g2_i1	104
TR12379|c0_g2_i1	12
TR12392|c0_g1_i1	48
TR12395|c0_g1_i1	184
TR12395|c0_g2_i1	112
TR12399|c0_g1_i1	20
TR12401|c0_g1_i1	50
TR12406|c0_g1_i1	20
TR12406|c0_g2_i1	38
TR1241|c0_g2_i1	18
TR12415|c0_g1_i1	22
TR12415|c0_g2_i1	38
TR12415|c0_g4_i1	42
TR12419|c0_g1_i1	16
TR1244|c0_g2_i1	32
TR12440|c1_g1_i1	16
TR12442|c1_g1_i1	22
TR12448|c0_g1_i1	74
TR12448|c1_g1_i1	16
TR12451|c0_g1_i1	154
TR12451|c0_g1_i2	42
TR12451|c0_g1_i3	170
TR12451|c0_g1_i4	30
TR12494|c0_g2_i1	16
TR12506|c0_g1_i1	34
TR12563|c0_g1_i1	154
TR12588|c0_g1_i1	48
TR12591|c0_g1_i1	24
TR12593|c0_g1_i1	14
TR12609|c0_g1_i1	168
TR12615|c0_g1_i1	52
TR12618|c0_g1_i1	62
TR12626|c0_g1_i1	40
TR1268|c0_g1_i1	14
TR12688|c0_g1_i1	226
TR12703|c0_g1_i1	20
TR12710|c0_g1_i1	20
TR12721|c0_g1_i1	48
TR1274|c0_g1_i1	18
TR12747|c0_g1_i1	108
TR12749|c0_g1_i1	42
TR12751|c0_g1_i1	20
TR12776|c0_g1_i1	16
TR12789|c0_g1_i1	14
TR12805|c0_g1_i1	18
TR12819|c0_g1_i1	14
TR12839|c0_g1_i1	68
TR12841|c0_g1_i1	20
TR12853|c0_g1_i1	16
TR12863|c0_g1_i1	36
TR12877|c0_g1_i1	12
TR12883|c0_g1_i1	104
TR1289|c0_g1_i2	24
TR12901|c0_g1_i1	26
TR1291|c0_g1_i1	28
TR12918|c0_g1_i1	22
TR12982|c0_g2_i1	40
TR12990|c0_g1_i1	16
TR13016|c0_g1_i1	12
TR13017|c0_g1_i1	14
TR13028|c0_g1_i1	26
TR13036|c0_g1_i1	12
TR13038|c0_g1_i1	116
TR13038|c1_g1_i1	110
TR13043|c0_g1_i1	12
TR13047|c0_g1_i1	40
TR13051|c0_g1_i1	36
TR13079|c0_g1_i1	14
TR1309|c0_g1_i1	90
TR13094|c0_g1_i1	20
TR13101|c0_g1_i1	1182
TR13101|c0_g2_i1	498
TR13108|c0_g1_i1	32
TR13120|c0_g2_i1	18
TR13122|c0_g1_i1	38
TR13129|c0_g1_i4	20
TR13144|c0_g1_i1	82
TR13144|c0_g1_i2	108
TR13155|c0_g1_i1	18
TR1317|c0_g1_i1	26
TR1317|c0_g1_i2	20
TR13210|c0_g2_i1	20
TR13211|c0_g2_i1	18
TR13219|c0_g1_i1	34
TR13219|c0_g1_i2	68
TR1322|c0_g2_i1	16
TR13221|c0_g1_i1	24
TR13225|c0_g1_i1	78
TR13226|c0_g1_i1	34
TR13227|c0_g1_i1	96
TR13248|c0_g1_i1	34
TR13261|c0_g1_i1	18
TR13270|c0_g1_i1	24
TR13286|c0_g1_i1	40
TR13304|c0_g1_i1	12
TR13307|c0_g1_i1	16
TR13313|c0_g1_i1	34
TR13338|c0_g1_i1	132
TR1336|c0_g1_i2	84
TR13371|c0_g1_i1	26
TR13374|c0_g1_i1	80
TR13388|c0_g1_i1	42
TR1339|c0_g1_i1	22
TR13390|c0_g1_i1	10
TR13404|c0_g1_i1	48
TR13428|c0_g1_i1	14
TR13430|c0_g2_i1	16
TR13437|c0_g3_i1	16
TR13442|c0_g1_i1	26
TR13445|c0_g2_i2	20
TR13459|c0_g1_i1	38
TR1346|c0_g1_i1	36
TR13466|c0_g2_i1	10
TR13468|c0_g1_i1	30
TR1347|c0_g2_i1	52
TR13482|c0_g1_i1	30
TR13485|c0_g1_i1	28
TR1349|c0_g1_i3	28
TR1349|c0_g1_i4	24
TR13493|c0_g1_i1	14
TR13502|c0_g1_i1	14
TR13502|c0_g2_i1	32
TR1351|c0_g1_i1	26
TR13518|c0_g1_i1	16
TR13528|c0_g1_i1	26
TR13539|c0_g1_i1	16
TR13544|c0_g1_i1	26
TR13547|c0_g1_i1	26
TR13559|c1_g1_i1	124
TR13562|c0_g1_i1	12
TR13567|c0_g2_i1	12
TR13568|c0_g1_i1	42
TR13573|c0_g1_i1	20
TR13576|c0_g1_i1	70
TR13576|c0_g2_i1	140
TR13603|c0_g1_i1	12
TR13627|c0_g1_i1	62
TR1363|c0_g2_i1	10
TR1363|c0_g4_i1	14
TR13642|c0_g1_i1	120
TR13645|c0_g1_i1	60
TR13648|c0_g1_i1	16
TR13648|c0_g3_i1	40
TR13650|c0_g1_i1	26
TR13665|c0_g1_i1	30
TR13666|c1_g1_i1	22
TR13679|c0_g2_i1	18
TR13685|c0_g1_i2	86
TR13692|c0_g1_i1	40
TR13697|c1_g3_i1	46
TR13711|c0_g1_i1	18
TR13727|c0_g1_i1	24
TR13733|c0_g1_i1	38
TR13738|c0_g1_i1	12
TR13743|c0_g1_i1	324
TR13743|c0_g1_i2	96
TR13743|c0_g1_i3	276
TR13743|c0_g2_i1	16
TR13753|c0_g1_i1	14
TR13758|c0_g1_i1	14
TR13770|c0_g1_i1	10
TR1378|c0_g1_i1	16
TR13780|c0_g1_i1	28
TR13816|c0_g1_i1	40
TR13826|c0_g1_i1	24
TR13878|c0_g1_i2	26
TR13884|c0_g3_i2	42
TR13892|c0_g1_i1	32
TR13892|c0_g2_i1	36
TR13894|c0_g1_i1	12
TR13895|c0_g1_i1	16
TR13901|c0_g1_i2	16
TR13902|c0_g1_i1	20
TR13924|c0_g2_i1	20
TR13934|c0_g1_i1	108
TR13934|c0_g1_i2	124
TR13947|c0_g2_i1	24
TR13948|c0_g3_i1	46
TR13961|c0_g1_i1	64
TR13963|c0_g1_i1	26
TR13965|c0_g1_i1	34
TR1397|c0_g1_i2	144
TR13978|c0_g1_i1	14
TR13996|c0_g2_i1	40
TR14001|c0_g1_i1	36
TR14004|c0_g1_i1	14
TR14006|c0_g1_i1	98
TR1401|c0_g1_i1	52
TR14015|c0_g1_i1	14
TR14024|c0_g2_i1	12
TR14027|c0_g2_i1	14
TR14045|c0_g1_i1	20
TR14057|c0_g1_i1	34
TR14075|c0_g1_i1	80
TR14081|c0_g1_i1	32
TR1409|c0_g1_i2	100
TR1409|c1_g1_i1	12
TR14115|c0_g1_i1	16
TR14115|c0_g2_i1	34
TR14136|c0_g1_i2	16
TR14139|c0_g1_i1	26
TR14184|c0_g1_i1	16
TR14190|c1_g1_i1	28
TR14197|c0_g1_i2	38
TR14206|c0_g2_i1	16
TR1423|c0_g1_i1	140
TR14238|c0_g1_i1	20
TR14252|c0_g1_i1	10
TR14253|c0_g1_i1	24
TR14271|c0_g1_i1	14
TR14285|c0_g1_i1	20
TR1429|c1_g1_i1	20
TR14292|c0_g1_i1	80
TR14292|c0_g1_i3	18
TR14297|c0_g1_i1	82
TR14311|c0_g1_i1	18
TR14316|c0_g1_i1	126
TR14327|c0_g1_i1	188
TR14327|c0_g2_i1	28
TR14336|c0_g1_i1	86
TR14337|c0_g1_i1	28
TR14341|c0_g1_i1	16
TR14342|c0_g1_i1	110
TR14342|c1_g1_i1	28
TR14349|c0_g2_i1	336
TR14356|c0_g1_i1	28
TR14365|c0_g1_i1	16
TR14370|c1_g1_i1	56
TR14383|c0_g1_i1	14
TR14384|c0_g1_i1	16
TR14384|c0_g2_i1	20
TR14387|c0_g1_i1	30
TR14388|c0_g1_i2	24
TR14388|c0_g2_i1	20
TR14391|c0_g2_i1	28
TR14395|c0_g2_i1	24
TR14396|c0_g1_i1	24
TR14417|c0_g1_i2	16
TR1442|c0_g1_i1	16
TR14426|c1_g1_i1	12
TR14428|c0_g1_i1	12
TR14440|c0_g1_i1	16
TR14448|c0_g2_i1	62
TR1445|c0_g1_i1	28
TR14454|c0_g1_i1	24
TR14459|c0_g1_i1	232
TR14459|c0_g2_i1	138
TR14477|c0_g1_i1	18
TR14484|c0_g1_i1	30
TR14496|c0_g1_i1	16
TR14505|c1_g1_i1	18
TR14508|c0_g1_i1	44
TR14533|c0_g2_i1	12
TR14539|c0_g1_i1	66
TR14539|c0_g2_i1	38
TR1454|c0_g1_i1	114
TR1454|c0_g2_i1	24
TR14541|c0_g1_i1	28
TR14546|c0_g1_i1	110
TR14562|c0_g1_i1	32
TR14563|c0_g1_i1	14
TR14573|c0_g1_i1	24
TR14575|c0_g1_i1	22
TR14580|c0_g2_i1	22
TR14587|c0_g1_i1	16
TR14587|c0_g1_i2	130
TR146|c0_g2_i1	64
TR14613|c0_g2_i1	46
TR1462|c0_g1_i1	18
TR14640|c0_g2_i1	26
TR14674|c0_g1_i1	36
TR14707|c0_g1_i1	32
TR14717|c0_g1_i1	18
TR1473|c0_g1_i1	20
TR14744|c0_g1_i1	12
TR14767|c0_g1_i1	10
TR14791|c0_g1_i1	308
TR14791|c0_g2_i1	208
TR1480|c0_g1_i1	36
TR1481|c0_g1_i1	34
TR14812|c1_g1_i1	14
TR14824|c0_g2_i1	40
TR1483|c0_g1_i1	18
TR14830|c0_g1_i1	18
TR14837|c0_g1_i1	14
TR14838|c0_g2_i1	18
TR14845|c0_g1_i1	62
TR14845|c0_g2_i1	34
TR14845|c0_g3_i1	42
TR14867|c0_g1_i2	62
TR14868|c0_g3_i1	24
TR14871|c0_g1_i1	12
TR14880|c0_g1_i1	32
TR14892|c0_g1_i1	20
TR14893|c0_g1_i1	24
TR14905|c0_g1_i1	18
TR1492|c0_g1_i1	76
TR14937|c0_g1_i1	28
TR14939|c0_g1_i2	66
TR14946|c0_g1_i1	18
TR14951|c0_g1_i1	30
TR14957|c0_g2_i1	12
TR14962|c0_g1_i1	12
TR14963|c0_g2_i1	16
TR14968|c0_g1_i1	100
TR14968|c0_g1_i2	20
TR1498|c0_g2_i2	12
TR1500|c0_g1_i1	38
TR15004|c0_g1_i2	16
TR15006|c0_g2_i1	58
TR15007|c0_g1_i1	38
TR15007|c1_g1_i1	82
TR15008|c0_g1_i1	22
TR15014|c0_g1_i1	16
TR15019|c0_g1_i1	100
TR15041|c0_g1_i1	20
TR1505|c0_g2_i1	32
TR15053|c0_g1_i1	10
TR1506|c0_g1_i1	72
TR1506|c0_g2_i1	80
TR15094|c0_g1_i1	12
TR15101|c0_g2_i1	66
TR15126|c0_g1_i1	16
TR15159|c0_g2_i1	20
TR1517|c0_g1_i1	18
TR15176|c0_g1_i1	30
TR15182|c0_g1_i1	12
TR15187|c0_g1_i1	12
TR15190|c0_g1_i1	12
TR15212|c0_g1_i1	16
TR15229|c0_g1_i2	46
TR1523|c0_g1_i1	14
TR1526|c0_g1_i1	62
TR15268|c0_g1_i1	12
TR1527|c0_g1_i1	22
TR15273|c0_g1_i1	18
TR15300|c0_g1_i1	12
TR15302|c0_g1_i1	40
TR15304|c0_g1_i1	24
TR15312|c0_g1_i1	22
TR15320|c0_g1_i1	18
TR1533|c0_g1_i1	18
TR15338|c0_g3_i1	22
TR15341|c0_g1_i1	64
TR15372|c0_g1_i1	44
TR15375|c0_g1_i2	26
TR15380|c0_g1_i2	14
TR15394|c0_g1_i1	18
TR15395|c0_g2_i1	18
TR15397|c0_g1_i1	100
TR154|c0_g1_i1	42
TR15403|c0_g2_i1	32
TR15432|c0_g1_i1	20
TR15438|c0_g1_i1	38
TR15441|c0_g2_i1	24
TR15446|c0_g1_i1	120
TR15446|c0_g2_i1	30
TR15454|c0_g1_i1	50
TR15468|c0_g2_i1	128
TR15475|c0_g1_i1	50
TR15486|c0_g2_i1	26
TR15494|c0_g1_i1	22
TR15494|c0_g1_i2	24
TR15508|c0_g1_i1	20
TR15511|c0_g1_i2	10
TR15514|c0_g1_i2	14
TR15533|c0_g1_i1	24
TR15560|c0_g1_i1	172
TR1557|c0_g1_i1	36
TR15583|c0_g1_i1	66
TR15587|c0_g1_i1	454
TR15589|c0_g1_i1	32
TR15593|c0_g1_i1	34
TR15593|c0_g2_i1	32
TR15598|c0_g1_i1	14
TR15598|c0_g3_i1	18
TR15603|c0_g1_i1	50
TR15604|c0_g1_i1	24
TR15614|c0_g1_i1	18
TR15617|c0_g1_i2	30
TR15624|c0_g2_i1	16
TR15638|c1_g1_i1	160
TR15638|c1_g3_i1	96
TR1566|c0_g1_i1	12
TR15662|c0_g1_i1	32
TR15669|c0_g1_i2	50
TR15690|c0_g1_i1	18
TR15692|c0_g1_i1	16
TR15696|c0_g1_i1	10
TR15714|c0_g1_i1	34
TR15724|c0_g1_i1	12
TR15728|c0_g1_i1	24
TR1573|c0_g1_i1	16
TR15731|c0_g1_i1	46
TR15732|c0_g2_i1	16
TR15734|c0_g2_i1	38
TR15735|c0_g1_i1	38
TR15740|c0_g1_i1	18
TR15748|c0_g1_i1	26
TR15758|c0_g1_i1	24
TR15775|c0_g1_i1	98
TR15782|c0_g1_i1	162
TR15784|c0_g1_i1	94
TR15786|c0_g1_i1	12
TR15790|c0_g1_i1	74
TR15819|c0_g1_i1	58
TR15822|c0_g2_i1	16
TR15830|c0_g1_i1	32
TR15839|c0_g1_i1	20
TR15848|c0_g1_i2	22
TR1585|c0_g2_i1	14
TR15867|c0_g2_i1	24
TR15870|c0_g2_i1	58
TR15893|c0_g2_i2	38
TR1591|c0_g1_i1	32
TR1591|c0_g2_i1	28
TR1591|c0_g3_i1	18
TR15919|c0_g1_i1	20
TR15920|c0_g1_i1	20
TR15923|c0_g1_i1	1220
TR15925|c0_g1_i1	44
TR15928|c0_g1_i1	16
TR1593|c1_g1_i1	36
TR15933|c0_g1_i1	36
TR15935|c0_g1_i1	52
TR15945|c0_g1_i2	26
TR1595|c0_g1_i1	22
TR15951|c0_g1_i1	16
TR15975|c1_g3_i1	202
TR15979|c0_g1_i1	12
TR15986|c0_g1_i1	58
TR15986|c0_g2_i1	40
TR15986|c0_g3_i1	48
TR15993|c0_g1_i1	14
TR15998|c0_g1_i1	16
TR1601|c0_g1_i1	54
TR1601|c0_g2_i1	26
TR1602|c0_g1_i1	16
TR1603|c0_g1_i1	82
TR16038|c0_g1_i1	12
TR16044|c0_g1_i1	272
TR16044|c0_g1_i2	264
TR16044|c0_g1_i3	264
TR16046|c0_g1_i1	3454
TR16055|c0_g1_i1	30
TR16055|c0_g2_i1	52
TR16058|c0_g1_i1	20
TR16064|c0_g1_i1	12
TR1607|c0_g3_i1	18
TR16071|c0_g1_i1	94
TR16107|c0_g1_i1	44
TR16113|c0_g1_i1	12
TR16115|c1_g3_i1	18
TR1612|c0_g1_i2	38
TR16121|c0_g2_i1	54
TR16121|c0_g3_i1	70
TR16124|c0_g1_i1	20
TR16128|c0_g2_i1	36
TR1613|c0_g1_i1	190
TR16134|c0_g1_i3	22
TR1615|c0_g1_i2	46
TR16154|c0_g1_i2	28
TR16157|c0_g1_i1	30
TR16159|c0_g1_i1	18
TR16173|c0_g1_i1	22
TR16186|c0_g2_i1	32
TR16188|c0_g1_i1	34
TR162|c0_g1_i1	14
TR16201|c0_g1_i4	16
TR16204|c0_g1_i1	28
TR16205|c1_g1_i1	18
TR16219|c0_g1_i2	20
TR16219|c1_g1_i1	30
TR16220|c0_g2_i1	12
TR16220|c0_g2_i2	26
TR16229|c0_g1_i1	28
TR16238|c0_g1_i1	16
TR16246|c0_g1_i2	14
TR16252|c0_g1_i2	26
TR16259|c0_g1_i1	58
TR1626|c0_g1_i2	12
TR16279|c0_g1_i1	26
TR16300|c0_g1_i2	20
TR16301|c0_g1_i1	22
TR16311|c0_g2_i1	20
TR16326|c0_g3_i1	26
TR16328|c0_g1_i2	16
TR16349|c0_g2_i1	70
TR16351|c0_g1_i1	16
TR16356|c0_g1_i1	26
TR16359|c0_g1_i1	20
TR16363|c0_g1_i1	66
TR16375|c0_g1_i1	36
TR16375|c0_g2_i1	48
TR16379|c0_g1_i1	16
TR16396|c0_g1_i1	60
TR16402|c0_g1_i1	38
TR16409|c0_g1_i2	20
TR1641|c0_g1_i1	20
TR16421|c0_g2_i1	32
TR16422|c1_g1_i2	1902
TR16424|c0_g1_i1	174
TR16424|c0_g2_i1	26
TR16425|c0_g1_i1	42
TR16427|c0_g1_i1	28
TR16430|c0_g1_i1	10
TR16431|c0_g1_i2	26
TR16445|c0_g1_i1	42
TR16446|c0_g1_i2	44
TR16456|c0_g1_i1	10
TR16457|c0_g1_i1	12
TR16457|c0_g3_i1	18
TR16459|c0_g1_i1	16
TR16470|c0_g1_i1	12
TR16477|c0_g1_i2	22
TR16479|c0_g1_i1	48
TR16479|c0_g1_i2	60
TR16486|c0_g2_i1	32
TR16487|c0_g2_i1	14
TR1649|c0_g1_i1	72
TR16501|c0_g1_i1	24
TR16511|c0_g1_i1	18
TR16513|c0_g1_i1	46
TR16518|c0_g2_i1	142
TR16519|c0_g1_i2	10
TR16520|c1_g1_i1	28
TR1653|c0_g2_i3	10
TR16545|c0_g2_i1	20
TR16549|c0_g1_i1	72
TR16555|c0_g1_i1	52
TR16555|c0_g2_i1	24
TR16558|c0_g1_i1	22
TR1657|c0_g3_i1	18
TR16575|c0_g1_i1	18
TR16584|c0_g1_i1	16
TR16590|c0_g1_i1	156
TR16590|c0_g1_i2	206
TR16590|c0_g1_i3	210
TR16590|c0_g2_i1	30
TR16602|c0_g2_i1	12
TR1661|c0_g1_i1	16
TR16614|c0_g4_i1	44
TR16615|c0_g1_i3	40
TR16633|c0_g1_i1	12
TR16637|c0_g1_i1	22
TR16640|c0_g1_i1	30
TR16640|c0_g2_i3	40
TR16667|c0_g2_i1	72
TR16692|c0_g1_i1	26
TR16700|c0_g2_i2	22
TR16717|c0_g2_i1	34
TR16718|c0_g1_i1	84
TR16725|c0_g2_i1	38
TR16727|c0_g1_i1	100
TR16732|c0_g1_i1	38
TR16737|c0_g1_i1	46
TR16737|c0_g1_i3	32
TR16739|c0_g1_i1	14
TR16741|c0_g1_i1	108
TR16756|c0_g1_i1	48
TR16756|c0_g1_i2	42
TR16764|c0_g1_i2	12
TR16766|c0_g2_i1	26
TR16774|c0_g1_i1	18
TR16781|c0_g1_i1	30
TR16782|c0_g1_i1	56
TR16782|c0_g1_i3	74
TR16782|c0_g1_i4	80
TR16782|c0_g2_i1	28
TR16784|c0_g1_i1	60
TR16796|c0_g1_i1	28
TR16801|c0_g1_i1	38
TR16811|c0_g1_i1	32
TR16815|c0_g1_i1	30
TR1682|c0_g1_i1	44
TR16836|c0_g1_i1	94
TR16852|c0_g1_i1	32
TR16860|c0_g1_i1	56
TR1687|c0_g1_i1	10
TR16897|c0_g1_i1	146
TR16900|c0_g2_i1	16
TR16906|c0_g1_i1	34
TR16921|c0_g1_i1	14
TR16923|c0_g1_i1	16
TR16925|c0_g1_i1	88
TR16925|c0_g1_i2	84
TR16928|c0_g1_i1	16
TR16936|c0_g1_i1	34
TR16938|c0_g1_i1	18
TR16946|c0_g1_i1	50
TR16958|c0_g1_i2	32
TR16959|c0_g2_i2	22
TR16960|c0_g1_i1	20
TR16976|c0_g1_i3	26
TR16981|c0_g1_i1	16
TR16985|c0_g2_i4	28
TR16985|c0_g2_i5	12
TR1700|c1_g1_i1	16
TR17000|c0_g1_i1	24
TR17006|c0_g1_i1	24
TR17027|c0_g2_i1	16
TR17033|c0_g1_i3	14
TR17034|c0_g1_i2	32
TR17036|c0_g1_i1	22
TR17036|c0_g2_i1	34
TR17043|c0_g2_i1	32
TR17045|c0_g1_i1	38
TR17050|c0_g1_i1	34
TR17057|c0_g2_i1	34
TR17057|c1_g1_i1	54
TR1706|c0_g1_i1	48
TR17102|c0_g1_i1	20
TR17105|c0_g2_i1	24
TR17112|c1_g2_i1	14
TR17115|c0_g2_i1	14
TR17119|c0_g1_i1	14
TR17123|c0_g1_i1	44
TR17127|c0_g1_i1	36
TR17129|c0_g2_i1	14
TR17130|c0_g1_i1	72
TR17130|c0_g2_i1	570
TR17130|c1_g1_i1	74
TR17131|c0_g1_i1	26
TR17131|c0_g1_i2	34
TR1714|c0_g1_i1	112
TR17144|c0_g4_i1	22
TR17144|c0_g4_i2	62
TR17145|c0_g2_i1	18
TR17151|c0_g1_i1	20
TR1716|c0_g1_i1	24
TR17164|c0_g1_i1	16
TR17167|c0_g1_i1	18
TR17171|c0_g1_i1	22
TR17174|c0_g1_i3	18
TR17180|c0_g1_i2	20
TR17185|c0_g1_i1	26
TR17189|c0_g1_i1	72
TR1719|c0_g1_i2	14
TR1719|c0_g1_i4	32
TR17191|c0_g1_i1	30
TR17198|c0_g2_i1	32
TR17204|c0_g1_i1	26
TR17204|c0_g2_i1	38
TR17204|c0_g2_i2	110
TR17207|c0_g3_i1	46
TR17212|c0_g1_i1	22
TR17225|c0_g4_i1	14
TR17226|c0_g2_i1	12
TR1723|c0_g1_i1	50
TR1723|c0_g2_i1	38
TR17230|c0_g1_i1	34
TR17234|c0_g1_i1	16
TR17239|c0_g1_i1	14
TR17241|c0_g1_i1	26
TR17249|c0_g1_i1	16
TR17253|c0_g1_i2	12
TR1726|c0_g2_i1	12
TR17281|c0_g1_i3	46
TR17295|c0_g1_i3	14
TR17300|c0_g2_i1	14
TR1731|c0_g3_i1	156
TR17315|c0_g1_i1	116
TR17323|c0_g2_i1	64
TR17323|c0_g2_i2	80
TR17332|c1_g1_i3	14
TR17334|c0_g1_i1	20
TR17346|c0_g1_i1	48
TR17348|c0_g1_i2	30
TR17349|c0_g1_i1	30
TR17353|c0_g1_i1	330
TR17355|c0_g1_i1	100
TR17355|c0_g1_i2	116
TR17355|c0_g1_i3	108
TR17365|c0_g1_i1	16
TR17370|c0_g1_i5	12
TR17374|c0_g2_i1	12
TR17379|c0_g1_i1	14
TR17392|c0_g1_i1	24
TR17398|c0_g1_i1	36
TR17398|c0_g1_i2	44
TR1740|c0_g2_i1	68
TR17402|c0_g1_i1	26
TR17407|c0_g1_i1	26
TR17410|c0_g1_i1	48
TR17414|c0_g1_i1	44
TR17419|c0_g1_i1	24
TR17428|c1_g1_i1	16
TR17432|c0_g1_i1	316
TR17440|c0_g1_i1	50
TR17457|c0_g1_i1	14
TR17458|c1_g1_i1	28
TR17477|c0_g1_i1	180
TR17477|c1_g1_i1	30
TR17485|c0_g2_i1	154
TR17485|c1_g1_i1	866
TR17500|c0_g1_i1	16
TR17513|c0_g1_i1	26
TR17514|c0_g1_i1	46
TR17514|c0_g2_i1	24
TR1752|c0_g2_i1	54
TR17521|c0_g1_i1	72
TR17534|c0_g2_i1	32
TR17546|c0_g1_i1	14
TR17548|c0_g2_i1	28
TR17549|c0_g1_i1	26
TR17560|c0_g1_i1	18
TR17565|c0_g2_i1	38
TR17569|c0_g1_i1	26
TR17578|c0_g1_i1	16
TR17596|c0_g1_i1	26
TR17606|c0_g1_i1	30
TR17607|c0_g1_i1	112
TR17611|c0_g2_i1	50
TR17616|c0_g1_i1	50
TR17617|c0_g2_i1	40
TR1762|c0_g3_i1	72
TR17622|c0_g2_i1	12
TR17626|c0_g1_i1	24
TR17632|c0_g1_i1	12
TR17635|c1_g1_i1	58
TR17635|c1_g1_i2	224
TR17636|c0_g1_i1	62
TR17636|c0_g1_i2	90
TR17636|c0_g1_i3	58
TR17650|c0_g1_i1	70
TR17651|c0_g1_i1	16
TR17656|c0_g1_i1	18
TR1766|c0_g1_i1	10
TR17664|c0_g1_i1	70
TR17667|c0_g1_i1	18
TR17670|c0_g1_i1	24
TR17674|c0_g1_i1	40
TR17691|c0_g1_i1	14
TR17697|c0_g1_i1	50
TR17701|c1_g1_i1	332
TR17702|c0_g1_i1	48
TR17717|c0_g1_i1	18
TR17726|c0_g1_i1	28
TR17726|c0_g2_i1	10
TR1774|c0_g2_i1	26
TR17744|c0_g1_i1	14
TR17749|c0_g1_i1	954
TR1775|c0_g1_i1	48
TR1775|c0_g1_i2	50
TR17758|c0_g2_i2	18
TR17762|c0_g1_i1	20
TR17773|c1_g1_i1	100
TR17773|c1_g1_i2	90
TR17773|c1_g1_i3	76
TR17773|c1_g1_i4	86
TR17778|c0_g1_i1	58
TR17782|c0_g1_i1	28
TR17796|c0_g1_i1	56
TR1780|c0_g1_i2	16
TR17805|c0_g1_i3	14
TR17814|c1_g1_i1	16
TR17814|c1_g2_i2	34
TR17819|c0_g1_i1	16
TR17819|c0_g1_i2	10
TR1783|c0_g1_i1	22
TR1783|c0_g1_i2	26
TR17833|c0_g1_i1	20
TR17833|c0_g2_i1	180
TR17833|c0_g2_i2	76
TR17833|c0_g3_i1	50
TR17838|c0_g1_i1	56
TR17839|c0_g1_i2	18
TR17849|c0_g1_i2	42
TR17850|c0_g2_i1	26
TR17850|c1_g1_i1	16
TR17855|c0_g2_i1	22
TR17858|c0_g1_i2	36
TR17859|c0_g1_i1	7054
TR17873|c0_g2_i1	22
TR17873|c0_g2_i2	46
TR17874|c0_g1_i1	122
TR17884|c0_g2_i1	24
TR17895|c0_g1_i1	12
TR17899|c0_g1_i1	48
TR17901|c0_g2_i2	84
TR17905|c0_g2_i1	112
TR17915|c0_g2_i1	20
TR17916|c0_g1_i1	16
TR17927|c0_g2_i1	14
TR17930|c0_g1_i1	24
TR17930|c0_g1_i2	42
TR17940|c0_g1_i1	44
TR17944|c0_g1_i1	70
TR17958|c0_g1_i1	30
TR17977|c0_g1_i3	28
TR17983|c0_g1_i1	12
TR17985|c0_g1_i2	16
TR17986|c1_g1_i1	62
TR17988|c0_g1_i1	16
TR17988|c0_g3_i1	20
TR18009|c0_g1_i1	26
TR18010|c0_g1_i1	10
TR18014|c0_g2_i1	90
TR18014|c0_g3_i1	38
TR18018|c0_g1_i1	50
TR18019|c0_g1_i2	28
TR1803|c0_g1_i1	58
TR18034|c0_g1_i1	12
TR18039|c0_g1_i1	22
TR18039|c0_g2_i1	22
TR18044|c0_g1_i2	26
TR18045|c0_g1_i1	12
TR18057|c1_g1_i1	96
TR18069|c0_g1_i1	26
TR18069|c0_g1_i2	44
TR18079|c0_g1_i1	50
TR18093|c0_g2_i1	12
TR1810|c0_g1_i1	14
TR18100|c0_g1_i2	34
TR18109|c0_g2_i1	108
TR18113|c0_g1_i1	28
TR18117|c0_g1_i1	20
TR18117|c0_g1_i2	26
TR18121|c0_g1_i1	14
TR18123|c0_g1_i1	12
TR18126|c0_g1_i1	116
TR18127|c0_g1_i2	34
TR18142|c0_g1_i1	12
TR18144|c0_g1_i1	38
TR18153|c0_g1_i4	64
TR18156|c0_g1_i3	86
TR18158|c0_g1_i1	86
TR18159|c0_g1_i1	48
TR18160|c0_g1_i1	120
TR18161|c0_g2_i1	14
TR18165|c1_g1_i1	22
TR1819|c0_g1_i1	18
TR18194|c0_g1_i1	20
TR18196|c0_g1_i1	62
TR1820|c0_g2_i1	30
TR1821|c0_g1_i1	18
TR18222|c0_g1_i1	18
TR18226|c0_g1_i1	24
TR18232|c0_g1_i1	18
TR18232|c0_g2_i1	24
TR18232|c0_g3_i1	24
TR18237|c0_g1_i1	30
TR18239|c0_g1_i1	20
TR18249|c0_g2_i1	28
TR18252|c0_g1_i1	24
TR18259|c0_g1_i1	74
TR18264|c0_g1_i1	34
TR18269|c0_g1_i1	22
TR18278|c0_g1_i1	26
TR18283|c0_g1_i1	28
TR18290|c0_g1_i1	26
TR18294|c0_g1_i1	32
TR18297|c0_g1_i2	16
TR18299|c0_g1_i1	44
TR1830|c0_g1_i1	18
TR18300|c1_g1_i1	100
TR18300|c1_g3_i1	26
TR18303|c0_g1_i1	18
TR18304|c0_g1_i1	36
TR18308|c0_g1_i1	88
TR18310|c0_g2_i1	24
TR18315|c0_g1_i1	18
TR18318|c0_g3_i1	26
TR18321|c0_g1_i1	20
TR18323|c0_g1_i1	14
TR18324|c0_g2_i1	12
TR18328|c0_g1_i1	48
TR18330|c0_g1_i1	16
TR18333|c0_g1_i1	16
TR18339|c0_g2_i1	14
TR18340|c0_g2_i3	28
TR18343|c0_g1_i1	28
TR18345|c0_g1_i1	30
TR18346|c0_g1_i1	18
TR18352|c0_g1_i1	14
TR18357|c0_g1_i2	20
TR18373|c0_g2_i1	104
TR18376|c0_g1_i1	3088
TR18376|c0_g1_i2	1050
TR18382|c0_g1_i2	22
TR18388|c0_g1_i2	52
TR1839|c1_g1_i1	20
TR1840|c0_g1_i1	12
TR18413|c0_g1_i1	88
TR18413|c0_g1_i2	32
TR18425|c0_g1_i1	190
TR18425|c0_g2_i1	52
TR1843|c0_g1_i1	32
TR18444|c0_g1_i1	104
TR18444|c0_g2_i1	40
TR18452|c0_g1_i1	34
TR18469|c0_g1_i1	38
TR18470|c0_g1_i2	124
TR18494|c0_g1_i1	14
TR18506|c0_g2_i1	16
TR18507|c0_g1_i1	52
TR18509|c0_g1_i1	30
TR18521|c0_g1_i1	130
TR18536|c0_g2_i1	10
TR18541|c0_g1_i1	54
TR18545|c0_g1_i1	16
TR1855|c0_g1_i1	24
TR18553|c0_g1_i2	14
TR1857|c0_g1_i1	46
TR18570|c0_g1_i2	30
TR18574|c1_g1_i2	12
TR1859|c0_g1_i1	18
TR1860|c0_g1_i1	28
TR18606|c0_g4_i1	12
TR18618|c0_g1_i1	28
TR18626|c0_g2_i1	182
TR18628|c0_g1_i1	24
TR18630|c0_g1_i1	32
TR18634|c0_g1_i3	22
TR18638|c0_g1_i2	40
TR18643|c0_g1_i1	50
TR18643|c0_g1_i2	18
TR18644|c0_g1_i1	16
TR18645|c0_g1_i2	46
TR18661|c0_g1_i2	50
TR18663|c0_g1_i1	16
TR18671|c1_g1_i1	40
TR18671|c1_g1_i2	26
TR18671|c2_g1_i2	128
TR18674|c0_g1_i1	84
TR18675|c0_g1_i1	18
TR18681|c0_g1_i1	16
TR18686|c0_g1_i1	366
TR18689|c0_g1_i1	42
TR18695|c0_g1_i1	44
TR1870|c0_g1_i1	4398
TR18701|c1_g1_i1	66
TR18701|c1_g2_i1	42
TR18703|c0_g1_i1	22
TR18712|c0_g2_i1	16
TR18713|c0_g1_i3	12
TR18723|c0_g1_i1	40
TR18725|c0_g2_i1	12
TR18728|c0_g2_i1	26
TR18730|c0_g1_i2	12
TR18732|c0_g2_i1	18
TR18735|c0_g1_i1	16
TR18747|c0_g2_i1	46
TR18754|c0_g1_i1	30
TR18756|c0_g1_i1	24
TR18756|c0_g1_i2	130
TR18756|c0_g1_i3	84
TR18756|c0_g2_i1	50
TR18763|c0_g3_i1	22
TR18770|c0_g1_i1	26
TR18776|c0_g1_i1	46
TR18788|c0_g2_i1	32
TR18791|c0_g1_i1	16
TR18796|c0_g1_i1	278
TR18804|c0_g2_i1	98
TR18806|c0_g1_i1	56
TR18809|c0_g1_i1	22
TR18819|c0_g1_i2	38
TR18824|c0_g3_i1	138
TR18824|c0_g4_i1	42
TR18830|c0_g1_i2	64
TR18875|c0_g2_i1	40
TR18887|c0_g1_i1	36
TR18889|c0_g1_i2	34
TR18891|c0_g1_i2	20
TR18892|c0_g2_i1	14
TR18893|c0_g1_i1	72
TR18893|c0_g1_i2	132
TR18895|c0_g1_i1	10
TR18904|c0_g1_i1	18
TR18910|c0_g1_i1	74
TR18918|c0_g1_i1	36
TR18919|c0_g1_i2	22
TR18924|c0_g1_i1	28
TR18927|c0_g1_i2	32
TR18944|c0_g1_i1	48
TR18994|c0_g1_i1	50
TR18994|c0_g1_i2	18
TR1901|c0_g1_i1	44
TR19011|c0_g1_i1	18
TR19012|c0_g2_i1	20
TR19013|c2_g1_i2	36
TR19022|c0_g1_i1	24
TR19034|c0_g1_i1	64
TR19038|c0_g1_i1	36
TR19042|c0_g1_i1	52
TR19052|c0_g1_i1	14
TR19064|c0_g1_i1	42
TR1907|c1_g1_i1	14
TR19073|c0_g1_i1	30
TR19082|c0_g1_i1	50
TR19091|c0_g2_i1	34
TR19091|c0_g4_i1	54
TR19106|c0_g2_i2	38
TR19106|c0_g2_i3	30
TR19110|c0_g1_i1	50
TR19128|c0_g3_i1	18
TR19139|c0_g2_i1	126
TR1914|c0_g1_i1	124
TR19143|c0_g1_i1	12
TR19144|c0_g1_i3	78
TR19148|c0_g1_i1	30
TR19150|c0_g1_i2	212
TR19158|c0_g1_i2	36
TR19191|c0_g1_i1	60
TR19191|c0_g1_i2	20
TR19195|c0_g1_i1	68
TR1920|c0_g1_i1	12
TR19204|c0_g1_i1	12
TR19205|c0_g5_i1	84
TR19207|c0_g1_i1	1670
TR19215|c0_g1_i1	12
TR19217|c0_g1_i3	120
TR1923|c0_g1_i1	34
TR19239|c0_g2_i1	20
TR19253|c0_g1_i1	36
TR19258|c0_g1_i1	16
TR19273|c0_g1_i1	18
TR19278|c0_g1_i2	32
TR19285|c0_g1_i1	12
TR19289|c0_g1_i1	16
TR19295|c0_g1_i2	18
TR19315|c0_g2_i1	20
TR19318|c1_g1_i1	12
TR19323|c0_g1_i1	22
TR19323|c0_g1_i2	22
TR19325|c0_g1_i1	18
TR19326|c0_g1_i1	26
TR19340|c0_g1_i1	18
TR19349|c0_g1_i1	42
TR19349|c1_g1_i1	38
TR19350|c0_g1_i1	12
TR19350|c0_g2_i1	28
TR19357|c0_g1_i1	20
TR19359|c0_g1_i2	14
TR19365|c0_g1_i1	22
TR19366|c0_g1_i1	44
TR19367|c0_g1_i2	28
TR19370|c0_g1_i1	54
TR19374|c0_g2_i1	48
TR19381|c0_g1_i1	14
TR19382|c0_g1_i5	14
TR19387|c0_g1_i1	44
TR19388|c0_g1_i1	88
TR19405|c0_g1_i2	116
TR19406|c0_g1_i1	26
TR19410|c0_g1_i1	38
TR19425|c0_g2_i1	26
TR19447|c0_g1_i1	14
TR1945|c0_g1_i1	226
TR19467|c0_g1_i1	26
TR19468|c0_g1_i1	24
TR19476|c0_g1_i1	44
TR19478|c0_g1_i1	22
TR1948|c0_g1_i3	16
TR19480|c0_g1_i1	16
TR19500|c0_g1_i3	16
TR19501|c0_g1_i2	22
TR19502|c1_g1_i1	686
TR19502|c1_g2_i1	678
TR19502|c1_g4_i1	174
TR19508|c0_g1_i2	36
TR19508|c1_g1_i1	26
TR19517|c0_g3_i1	70
TR1952|c0_g2_i1	16
TR19525|c0_g1_i1	20
TR19528|c0_g1_i1	50
TR19531|c0_g1_i1	16
TR19536|c0_g1_i2	11296
TR19537|c0_g1_i1	16
TR19539|c0_g1_i1	26
TR19541|c4_g1_i4	36
TR19541|c4_g1_i5	32
TR19567|c0_g2_i2	38
TR19574|c0_g1_i2	28
TR19581|c0_g1_i2	16
TR19589|c1_g1_i2	32
TR19597|c0_g1_i2	18
TR19602|c0_g1_i1	10
TR19607|c0_g1_i1	504
TR19608|c0_g1_i1	12
TR19609|c0_g1_i1	40
TR19618|c0_g2_i1	48
TR19632|c0_g1_i1	32
TR19633|c0_g1_i1	90
TR19634|c0_g2_i1	958
TR19634|c0_g2_i2	1380
TR19634|c0_g3_i1	98
TR19638|c0_g1_i2	14
TR19638|c0_g2_i1	84
TR19640|c0_g2_i1	20
TR19641|c0_g2_i1	18
TR19643|c0_g1_i1	40
TR19650|c0_g1_i1	22
TR19651|c0_g1_i1	32
TR19666|c0_g2_i1	90
TR1967|c0_g2_i1	24
TR19671|c0_g1_i1	16
TR19675|c0_g1_i1	14
TR19687|c0_g1_i2	48
TR19688|c0_g1_i1	100
TR19692|c0_g1_i2	20
TR19693|c0_g1_i1	268
TR19693|c0_g3_i1	186
TR197|c0_g2_i1	38
TR19701|c0_g1_i1	40
TR19702|c0_g2_i1	22
TR19711|c0_g1_i1	74
TR19711|c0_g1_i2	420
TR19720|c0_g1_i3	42
TR19723|c0_g1_i1	30
TR19735|c0_g1_i1	30
TR19735|c0_g1_i2	34
TR19737|c0_g1_i2	14
TR19745|c0_g1_i2	18
TR19746|c0_g2_i1	42
TR19751|c0_g1_i1	48
TR19758|c0_g1_i1	24
TR1976|c0_g1_i1	34
TR19763|c0_g2_i1	14
TR1977|c0_g1_i1	30
TR19779|c0_g1_i2	24
TR19790|c0_g1_i1	22
TR1981|c0_g1_i2	12
TR19814|c0_g1_i1	24
TR19853|c0_g1_i1	36
TR19859|c0_g2_i1	32
TR19866|c0_g1_i1	28
TR19884|c0_g1_i1	200
TR19886|c0_g2_i1	52
TR19887|c0_g1_i1	44
TR19896|c0_g1_i1	14
TR19916|c0_g1_i1	210
TR19917|c0_g1_i1	18
TR1992|c0_g1_i1	206
TR19923|c0_g1_i1	52
TR19928|c0_g2_i1	136
TR19933|c0_g1_i1	14
TR19938|c0_g1_i2	16
TR19938|c0_g1_i3	28
TR19938|c0_g2_i1	74
TR19954|c1_g1_i1	40
TR19954|c1_g1_i2	28
TR19957|c0_g2_i1	16
TR19970|c0_g1_i3	30
TR19973|c1_g2_i3	30
TR19974|c1_g1_i1	22
TR19975|c0_g1_i1	28
TR19976|c0_g1_i2	26
TR19976|c0_g1_i3	42
TR19992|c0_g1_i2	26
TR19993|c0_g1_i1	40
TR19996|c0_g1_i4	82
TR19997|c0_g2_i1	24
TR19999|c0_g1_i1	514
TR20012|c0_g1_i1	14
TR20013|c0_g1_i3	60
TR20016|c0_g1_i1	20
TR20017|c0_g2_i1	14
TR20025|c0_g2_i1	18
TR20043|c0_g1_i2	62
TR20046|c0_g3_i1	22
TR20052|c1_g1_i2	34
TR20052|c1_g1_i3	136
TR20052|c1_g1_i5	68
TR20052|c1_g1_i9	44
TR20053|c0_g2_i1	12
TR20055|c0_g1_i1	88
TR20064|c1_g1_i1	70
TR20065|c0_g1_i1	24
TR20067|c0_g2_i4	20
TR20068|c0_g1_i1	54
TR20068|c0_g4_i1	34
TR20068|c0_g4_i3	114
TR20073|c0_g1_i1	12
TR20074|c0_g1_i1	1904
TR20075|c0_g1_i4	14
TR20078|c0_g1_i1	1720
TR20080|c0_g1_i4	72
TR20080|c0_g1_i5	22
TR20089|c0_g1_i1	20
TR20093|c0_g3_i1	10
TR20103|c0_g1_i1	34
TR20104|c0_g1_i1	32
TR20108|c0_g1_i2	38
TR2011|c0_g1_i1	140
TR20110|c0_g1_i2	24
TR20110|c0_g1_i3	60
TR20110|c0_g1_i4	46
TR20111|c0_g1_i1	34
TR20116|c0_g4_i1	12
TR20124|c0_g1_i1	576
TR20128|c0_g1_i1	34
TR20132|c0_g1_i1	40
TR20136|c0_g1_i1	16
TR20136|c0_g2_i1	110
TR20144|c0_g1_i1	154
TR20154|c0_g1_i1	42
TR20168|c0_g1_i1	20
TR20168|c1_g1_i1	22
TR20171|c0_g1_i1	28
TR20171|c0_g1_i2	16
TR20179|c0_g1_i1	28
TR20179|c1_g1_i3	2796
TR20179|c1_g1_i4	2798
TR20183|c1_g2_i1	38
TR20188|c0_g2_i1	118
TR20188|c0_g5_i1	52
TR2019|c0_g1_i1	12
TR20191|c0_g2_i1	48
TR20191|c0_g4_i1	106
TR20195|c0_g1_i2	22
TR20196|c0_g1_i2	38
TR20204|c0_g1_i1	134
TR2021|c0_g1_i1	30
TR20216|c0_g1_i1	12
TR20222|c0_g1_i1	44
TR20223|c0_g1_i1	30
TR20224|c0_g1_i1	22
TR20236|c0_g1_i1	34
TR20247|c0_g1_i1	22
TR20261|c0_g2_i1	30
TR20268|c0_g1_i2	18
TR20268|c0_g3_i1	24
TR20273|c0_g1_i1	56
TR20276|c0_g1_i3	118
TR20276|c0_g1_i4	696
TR20284|c0_g1_i1	200
TR20293|c0_g1_i2	52
TR20297|c0_g1_i3	30
TR20299|c0_g1_i1	42
TR20326|c0_g3_i1	38
TR20326|c0_g4_i1	24
TR20326|c0_g5_i1	14
TR20330|c0_g2_i1	74
TR20332|c0_g1_i1	74
TR20337|c0_g1_i1	88
TR20339|c0_g1_i2	106
TR2034|c0_g2_i1	12
TR20340|c0_g1_i1	20
TR20354|c0_g1_i2	20
TR20361|c0_g1_i2	70
TR20366|c0_g1_i1	402
TR20383|c0_g1_i1	30
TR20384|c0_g3_i1	28
TR20387|c0_g1_i1	14
TR2039|c0_g1_i1	14
TR2039|c0_g2_i1	28
TR20392|c0_g1_i1	58
TR20392|c0_g1_i2	36
TR20396|c0_g1_i2	24
TR20402|c0_g1_i3	14
TR20405|c0_g2_i1	20
TR20409|c0_g1_i2	16
TR20417|c0_g2_i1	52
TR20420|c0_g2_i2	228
TR20420|c0_g2_i4	348
TR20420|c0_g2_i5	84
TR20426|c0_g1_i1	12
TR20430|c0_g2_i1	20
TR20435|c0_g1_i1	16
TR20437|c1_g1_i1	24
TR20454|c0_g1_i1	34
TR20456|c0_g1_i1	158
TR20459|c0_g1_i2	60
TR20462|c0_g1_i2	118
TR20469|c0_g1_i1	88
TR20470|c0_g2_i1	16
TR20478|c0_g1_i1	30
TR20487|c0_g1_i1	14
TR20488|c0_g1_i1	28
TR20490|c1_g1_i2	32
TR20494|c0_g1_i1	90
TR20495|c0_g1_i1	22
TR20501|c0_g2_i1	74
TR20503|c1_g1_i1	16
TR20503|c1_g1_i2	44
TR20506|c0_g1_i2	28
TR20506|c0_g1_i3	22
TR20512|c0_g1_i1	168
TR20517|c0_g2_i1	50
TR20517|c0_g2_i4	216
TR20517|c0_g2_i9	242
TR20524|c0_g1_i1	18
TR20535|c0_g2_i1	48
TR20538|c0_g1_i1	12
TR20543|c0_g1_i1	56
TR20545|c1_g1_i1	20
TR20551|c0_g1_i3	116
TR20553|c0_g1_i3	50
TR20555|c0_g1_i1	102
TR20556|c0_g1_i1	264
TR20558|c0_g1_i1	20
TR20562|c0_g1_i1	34
TR20563|c0_g1_i1	20
TR20572|c0_g1_i1	42
TR20575|c0_g1_i1	16
TR20577|c0_g1_i2	30
TR20588|c0_g1_i1	14
TR206|c0_g1_i1	24
TR20600|c0_g1_i1	36
TR20607|c0_g1_i2	16
TR20610|c0_g1_i1	38
TR20611|c0_g1_i1	28
TR20611|c0_g1_i2	32
TR2063|c0_g1_i1	64
TR2063|c0_g1_i2	76
TR20638|c0_g1_i1	14
TR20663|c0_g1_i1	36
TR20663|c0_g4_i1	18
TR20678|c0_g1_i1	68
TR20679|c0_g1_i2	50
TR20692|c0_g2_i1	10
TR20693|c0_g1_i3	76
TR20693|c0_g1_i4	106
TR20693|c0_g1_i5	214
TR20697|c0_g1_i1	26
TR2070|c0_g1_i1	20
TR20701|c0_g1_i1	12
TR20701|c0_g2_i1	62
TR20710|c0_g1_i1	180
TR20710|c0_g1_i2	182
TR20710|c1_g1_i1	30
TR20711|c0_g1_i1	16
TR20712|c0_g1_i1	14
TR20715|c0_g1_i1	32
TR20716|c0_g1_i1	26
TR20719|c0_g1_i2	4254
TR20721|c0_g1_i1	18
TR20725|c0_g1_i1	16
TR20727|c0_g2_i1	20
TR20728|c0_g1_i1	22
TR20735|c0_g2_i1	18
TR20735|c0_g2_i2	16
TR20738|c0_g1_i1	22
TR20739|c0_g1_i1	42
TR20739|c0_g1_i2	14
TR20741|c0_g1_i1	16
TR20746|c0_g1_i3	20
TR20748|c0_g1_i1	34
TR20760|c0_g1_i1	20
TR20763|c0_g1_i1	28
TR20765|c0_g1_i1	10
TR20767|c0_g1_i4	80
TR20771|c0_g1_i2	18
TR2078|c0_g1_i1	12
TR20788|c0_g1_i2	74
TR20790|c0_g1_i2	36
TR20793|c1_g1_i1	24
TR20793|c1_g2_i1	48
TR20793|c1_g2_i2	42
TR20796|c0_g1_i4	22
TR20797|c0_g1_i1	20
TR20801|c0_g1_i1	56
TR20804|c0_g1_i2	76
TR20805|c0_g1_i1	44
TR20807|c0_g1_i1	14
TR20810|c0_g1_i1	18
TR20811|c0_g2_i1	16
TR20815|c0_g1_i2	14
TR20816|c0_g1_i1	78
TR20816|c0_g2_i1	26
TR20818|c0_g1_i1	74
TR20819|c0_g1_i1	16
TR20835|c0_g1_i1	58
TR2084|c0_g3_i1	18
TR20847|c0_g2_i1	24
TR20853|c0_g1_i2	64
TR20856|c0_g1_i1	16
TR20858|c0_g1_i2	26
TR20860|c0_g3_i1	24
TR20860|c1_g1_i1	24
TR20867|c0_g1_i1	18
TR20869|c0_g1_i1	344
TR20869|c0_g1_i2	100
TR20874|c0_g1_i2	18
TR20878|c0_g1_i1	30
TR2088|c0_g1_i1	16
TR20880|c0_g1_i1	42
TR20880|c0_g3_i1	166
TR20880|c0_g3_i2	142
TR20880|c0_g3_i3	34
TR20889|c0_g1_i1	24
TR20892|c0_g1_i3	22
TR20892|c0_g1_i4	60
TR2090|c0_g1_i1	18
TR2090|c0_g1_i2	22
TR20908|c0_g2_i1	14
TR20909|c0_g1_i1	10
TR20914|c0_g2_i1	26
TR20929|c0_g1_i1	48
TR20930|c0_g1_i1	38
TR20932|c0_g1_i1	172
TR20940|c0_g1_i1	28
TR20944|c0_g1_i3	24
TR20952|c0_g1_i2	36
TR20957|c0_g1_i1	56
TR20957|c0_g1_i2	56
TR20957|c0_g1_i3	60
TR20958|c0_g1_i1	122
TR20959|c0_g1_i1	46
TR20966|c0_g1_i2	88
TR20966|c0_g1_i3	116
TR20967|c0_g1_i2	36
TR20968|c0_g1_i1	16
TR20969|c0_g1_i3	24
TR20977|c0_g2_i1	26
TR20979|c1_g1_i1	34
TR20987|c0_g1_i1	132
TR20987|c0_g1_i4	16
TR21000|c0_g2_i1	22
TR21001|c0_g1_i5	92
TR21005|c0_g1_i2	18
TR21011|c0_g1_i1	50
TR21017|c0_g1_i1	40
TR21020|c0_g1_i2	32
TR21027|c0_g1_i2	244
TR21028|c0_g1_i1	20
TR21030|c1_g1_i2	20
TR21036|c0_g1_i1	100
TR21041|c0_g3_i1	44
TR21055|c0_g1_i5	48
TR21071|c0_g1_i1	12
TR21079|c0_g1_i1	50
TR21089|c0_g1_i2	54
TR21094|c0_g1_i1	12
TR21094|c0_g2_i1	56
TR21100|c0_g1_i1	14
TR21101|c0_g1_i4	306
TR21103|c0_g1_i1	24
TR21110|c0_g1_i1	26
TR21110|c0_g1_i2	34
TR21111|c0_g1_i1	36
TR21113|c0_g1_i1	22
TR21123|c0_g1_i1	24
TR21123|c1_g1_i1	84
TR21128|c0_g2_i1	36
TR21131|c0_g1_i1	36
TR21153|c0_g1_i1	32
TR21153|c0_g2_i1	68
TR21154|c1_g1_i1	22
TR21157|c0_g1_i1	14
TR21160|c0_g1_i1	18
TR21167|c0_g1_i1	112
TR21168|c2_g1_i1	54
TR21174|c0_g1_i1	284
TR21175|c0_g1_i3	22
TR21185|c0_g1_i2	22
TR21188|c0_g1_i1	22
TR21202|c0_g1_i1	90
TR21204|c0_g1_i1	66
TR21206|c1_g1_i1	16
TR21207|c0_g1_i1	20
TR2121|c0_g1_i4	14
TR21221|c0_g1_i2	56
TR21222|c0_g1_i1	34
TR21226|c0_g1_i2	24
TR21229|c0_g1_i1	28
TR2123|c0_g1_i1	344
TR21237|c1_g1_i1	24
TR21240|c0_g1_i2	18
TR2125|c0_g1_i2	14
TR2125|c1_g1_i1	16
TR21257|c0_g2_i1	18
TR21259|c0_g1_i1	16
TR21271|c0_g1_i2	30
TR21274|c0_g1_i1	44
TR21282|c1_g1_i1	88
TR21282|c1_g1_i2	80
TR21285|c1_g1_i1	54
TR21285|c1_g2_i1	20
TR21287|c1_g1_i2	24
TR21289|c1_g1_i1	200
TR21289|c1_g1_i2	134
TR21289|c2_g1_i1	20
TR21293|c0_g1_i1	26
TR21298|c0_g1_i1	30
TR2130|c0_g1_i1	64
TR2130|c0_g1_i2	44
TR21303|c0_g1_i1	28
TR21313|c0_g1_i1	238
TR21316|c0_g2_i1	42
TR21317|c0_g1_i2	26
TR21318|c0_g1_i2	30
TR21320|c0_g1_i2	16698
TR21336|c0_g1_i1	42
TR21337|c0_g1_i1	94
TR21345|c0_g1_i1	26
TR21345|c0_g1_i2	18
TR21346|c0_g1_i1	30
TR21348|c0_g2_i1	56
TR21356|c0_g1_i1	118
TR21357|c0_g1_i1	14
TR21358|c1_g2_i1	48
TR2136|c0_g1_i1	14
TR21361|c0_g1_i3	228
TR21367|c0_g1_i1	24
TR21369|c0_g1_i4	58
TR21375|c0_g1_i2	10
TR21392|c0_g1_i1	50
TR21392|c0_g1_i3	46
TR21399|c0_g1_i1	52
TR21402|c0_g1_i1	24
TR21403|c0_g1_i1	124
TR21409|c0_g1_i1	20
TR21424|c0_g1_i1	30
TR21436|c1_g2_i1	16
TR21438|c0_g1_i2	20
TR2144|c0_g2_i1	48
TR21441|c0_g1_i1	312
TR21441|c0_g1_i2	390
TR21462|c0_g1_i1	12
TR21463|c0_g1_i1	52
TR21465|c0_g1_i2	28
TR21466|c0_g1_i3	20
TR2147|c0_g1_i2	12
TR21474|c0_g1_i2	16
TR21475|c0_g1_i1	50
TR21476|c0_g1_i1	16
TR21477|c0_g1_i3	78
TR21479|c0_g1_i2	24
TR21480|c0_g1_i1	40
TR21481|c0_g1_i2	96
TR21482|c0_g2_i1	14
TR21488|c0_g2_i1	48
TR21488|c0_g2_i4	32
TR21495|c0_g1_i3	90
TR21496|c0_g1_i1	106
TR21498|c0_g1_i1	30
TR21500|c0_g1_i1	14
TR21506|c1_g1_i1	4372
TR21506|c1_g2_i1	876
TR21508|c0_g2_i1	110
TR21518|c0_g1_i2	18
TR21518|c0_g1_i3	70
TR21520|c0_g1_i1	62
TR21520|c1_g1_i2	42
TR21521|c0_g1_i1	32
TR2153|c0_g1_i1	22
TR21533|c0_g1_i1	32
TR21536|c0_g1_i1	18
TR21542|c0_g1_i1	16
TR21543|c0_g1_i3	58
TR21557|c0_g1_i1	24
TR2157|c0_g1_i2	24
TR2157|c0_g1_i4	40
TR21582|c0_g1_i1	24
TR21582|c1_g1_i1	40
TR21584|c0_g1_i1	86
TR21608|c0_g1_i1	12
TR2161|c0_g1_i1	32
TR21612|c0_g2_i1	20
TR21615|c0_g2_i1	14
TR21618|c0_g1_i1	56
TR21619|c0_g1_i1	116
TR2162|c0_g1_i2	42
TR21627|c0_g1_i2	18
TR21631|c0_g1_i1	42
TR21634|c1_g1_i1	14
TR2164|c0_g1_i3	130
TR2164|c0_g1_i4	102
TR2164|c0_g2_i2	56
TR21647|c0_g1_i2	42
TR21649|c0_g1_i1	28
TR2165|c0_g4_i1	30
TR21652|c0_g1_i1	194
TR2166|c0_g3_i5	140
TR21663|c0_g1_i1	28
TR21664|c0_g1_i1	40
TR2167|c0_g1_i1	684
TR21673|c0_g3_i1	28
TR2168|c0_g1_i1	954
TR2168|c0_g1_i2	24
TR2168|c0_g1_i3	266
TR21684|c0_g1_i1	22
TR21689|c0_g1_i1	20
TR21693|c0_g1_i3	98
TR21696|c0_g1_i2	24
TR21703|c0_g1_i1	18
TR21708|c0_g1_i4	56
TR21710|c0_g1_i1	16
TR21714|c0_g1_i1	22
TR2172|c0_g1_i1	42
TR2172|c0_g2_i7	48
TR21726|c0_g1_i1	58
TR21729|c0_g1_i1	40
TR2173|c0_g1_i2	34
TR21732|c0_g1_i3	108
TR21732|c0_g2_i1	18
TR21735|c0_g2_i2	118
TR21735|c0_g2_i4	64
TR21735|c0_g3_i1	24
TR21738|c0_g1_i1	198
TR2174|c1_g1_i2	44
TR2174|c1_g1_i3	12
TR21757|c0_g1_i2	280
TR21764|c0_g1_i1	16
TR21764|c0_g1_i2	18
TR21768|c0_g1_i2	30
TR2178|c6_g4_i5	16
TR2178|c6_g5_i1	52
TR21791|c2_g1_i1	54
TR21793|c0_g1_i1	46
TR21798|c0_g1_i3	30
TR21800|c0_g1_i2	2510
TR21803|c0_g1_i1	18
TR21804|c0_g1_i2	38
TR2181|c0_g1_i1	86
TR2181|c0_g1_i2	122
TR21811|c0_g1_i1	20
TR21813|c0_g1_i1	16
TR21817|c0_g1_i1	36
TR21819|c0_g1_i3	16
TR21820|c0_g1_i2	84
TR21832|c0_g1_i1	60
TR21832|c0_g1_i2	554
TR21832|c0_g1_i3	634
TR21839|c0_g2_i1	14
TR2184|c0_g4_i1	252
TR2184|c0_g4_i10	584
TR2184|c0_g4_i11	462
TR2184|c0_g4_i2	652
TR2184|c0_g5_i1	16
TR2184|c0_g9_i1	18
TR2185|c0_g1_i1	34
TR21853|c0_g1_i1	84
TR21865|c0_g1_i1	34
TR21870|c0_g1_i2	36
TR21872|c0_g1_i3	202
TR2188|c0_g1_i2	144
TR21883|c0_g1_i2	18
TR21887|c0_g1_i1	54
TR21888|c0_g1_i1	10
TR21891|c0_g1_i1	142
TR21891|c0_g1_i10	48
TR21891|c0_g1_i2	198
TR21891|c0_g1_i3	134
TR21891|c0_g1_i4	230
TR21891|c0_g1_i5	190
TR21891|c0_g1_i6	240
TR21891|c0_g1_i7	200
TR21891|c0_g1_i8	208
TR21903|c0_g1_i2	22
TR21903|c0_g2_i3	20
TR21905|c0_g1_i1	18
TR2191|c1_g2_i5	52
TR2191|c1_g2_i7	30
TR21922|c0_g3_i1	58
TR21925|c0_g1_i2	40
TR21925|c0_g1_i3	40
TR21925|c1_g1_i1	44
TR21925|c1_g1_i2	22
TR21925|c1_g1_i3	48
TR21928|c0_g1_i1	22
TR21936|c0_g1_i1	12
TR21938|c0_g2_i1	28
TR21939|c0_g3_i1	60
TR21940|c0_g1_i1	86
TR21941|c0_g1_i1	48
TR21948|c0_g1_i1	66
TR2195|c0_g2_i1	20
TR21954|c0_g1_i1	72
TR21955|c0_g1_i3	24
TR21963|c0_g1_i1	52
TR21963|c0_g2_i2	24
TR21965|c0_g2_i1	58
TR21966|c0_g1_i1	16
TR21967|c0_g1_i1	14
TR21970|c0_g1_i1	14
TR21970|c0_g1_i2	10
TR21973|c0_g1_i1	20
TR21974|c1_g1_i2	28
TR21974|c1_g2_i3	24
TR21977|c0_g1_i1	480
TR2198|c0_g2_i3	100
TR21980|c1_g1_i1	22
TR21984|c0_g1_i1	40
TR21985|c0_g1_i1	32
TR21988|c0_g1_i1	66
TR21988|c0_g1_i4	54
TR2199|c0_g1_i2	132
TR2199|c0_g1_i3	32
TR2199|c0_g1_i4	20
TR21990|c0_g2_i1	28
TR21994|c1_g1_i1	62
TR21994|c1_g1_i3	118
TR22001|c1_g2_i1	10
TR22003|c0_g1_i1	32
TR2201|c0_g2_i1	28
TR2202|c0_g1_i2	42
TR2202|c0_g1_i4	36
TR22022|c0_g1_i1	24
TR22023|c0_g1_i2	28
TR22023|c0_g2_i2	72
TR22024|c0_g1_i1	138
TR22030|c0_g1_i1	32
TR22033|c0_g1_i1	18
TR22035|c0_g1_i1	44
TR2204|c0_g1_i3	98
TR2204|c0_g1_i4	20
TR2204|c0_g1_i6	34
TR22041|c0_g2_i1	48
TR22041|c0_g2_i2	40
TR22044|c0_g1_i1	28
TR22050|c0_g1_i1	74
TR22057|c0_g1_i1	34
TR2206|c0_g3_i2	30
TR22061|c0_g1_i3	28
TR22062|c0_g1_i1	206
TR22064|c0_g1_i1	28
TR22067|c0_g1_i2	36
TR22067|c0_g1_i3	40
TR22076|c0_g2_i1	56
TR22077|c1_g1_i1	50
TR22077|c1_g2_i1	40
TR22087|c0_g1_i1	20
TR2209|c0_g2_i1	108
TR2209|c0_g3_i1	116
TR2209|c0_g3_i5	60
TR2210|c0_g1_i2	180
TR22111|c0_g1_i1	24
TR22111|c0_g1_i2	84
TR22113|c2_g1_i2	16
TR22117|c0_g1_i1	20
TR2212|c0_g1_i1	18
TR2212|c1_g2_i4	358
TR22120|c0_g1_i2	18
TR22121|c1_g2_i1	30
TR22126|c0_g1_i1	42
TR22126|c0_g1_i3	44
TR22130|c0_g1_i2	18
TR22132|c0_g2_i1	46
TR22133|c0_g1_i1	46
TR2214|c3_g11_i1	44
TR2214|c3_g3_i1	562
TR2214|c3_g3_i2	58
TR2214|c3_g5_i1	216
TR22141|c0_g1_i1	98
TR22141|c0_g1_i2	46
TR22145|c0_g1_i1	12
TR22152|c1_g1_i1	18
TR2216|c1_g4_i1	72
TR2216|c1_g4_i3	134
TR2216|c1_g4_i6	34
TR2216|c1_g4_i8	236
TR22163|c0_g1_i1	68
TR22168|c0_g2_i1	20
TR2217|c0_g1_i3	44
TR2217|c1_g1_i4	110
TR22171|c1_g2_i1	40
TR22174|c0_g2_i1	18
TR2218|c1_g4_i12	94
TR2218|c1_g4_i2	140
TR2218|c1_g4_i6	94
TR2218|c1_g4_i7	120
TR2218|c1_g5_i2	16
TR22182|c0_g1_i2	18
TR22184|c0_g2_i4	52
TR22189|c0_g1_i1	70
TR22200|c0_g1_i1	2958
TR22200|c0_g1_i2	5080
TR22201|c0_g1_i1	32
TR22218|c0_g1_i2	26
TR22220|c0_g1_i1	74
TR22226|c0_g1_i1	104
TR22229|c0_g1_i2	50
TR22230|c0_g1_i2	68
TR22234|c0_g1_i1	16
TR22235|c0_g1_i1	46
TR2224|c0_g1_i3	88
TR22247|c0_g1_i1	26
TR22250|c0_g1_i1	18
TR22253|c0_g1_i1	18
TR22254|c0_g1_i1	60
TR22254|c0_g1_i3	74
TR22258|c0_g1_i2	40
TR22260|c0_g1_i1	40
TR22266|c0_g1_i5	22
TR2227|c2_g1_i4	64
TR2227|c3_g3_i5	78
TR2227|c3_g3_i8	64
TR22273|c0_g3_i1	32
TR22279|c0_g2_i1	22
TR2228|c0_g1_i1	16
TR2228|c0_g1_i3	164
TR2228|c0_g2_i1	346
TR2228|c0_g3_i1	306
TR22283|c0_g1_i1	24
TR22287|c0_g1_i1	1104
TR22289|c0_g1_i1	1402
TR2229|c0_g1_i1	38
TR22297|c0_g1_i1	52
TR22301|c0_g1_i1	20
TR22306|c0_g2_i1	226
TR2232|c0_g1_i2	46
TR22321|c0_g1_i2	26
TR22321|c0_g1_i3	60
[truncated: 24,695 more rows]

## Sheet: OBP1_vs_OKP2_Differential
Transcript ID	baseMeanA( OK_P2)	baseMeanB(OB_P1)	log2FoldChange( OB_P1 Vs. OK_P2)	pval	padj	Significant	Hit Description	Hit Organism	Family	Gene Ontology (Biological Process)	Gene Ontology (Molecular Function)	Gene Ontology (Cellular Component)	Pathway
TR31264|c0_g2_i3	31.8198	3390.34	6.73536	8.41332e-07	0.0115195	Yes	PREDICTED: thaumatin-like protein	Sesamum indicum	NA	NA	NA	NA	NA
TR19069|c0_g1_i1	29.6985	2628.55	6.46773	8.06791e-07	0.0165699	Yes	NA	NA	NA	NA	NA	NA	NA
TR30978|c1_g1_i4	19.0919	1325.59	6.11753	7.59245e-07	0.0311867	Yes	hypothetical protein MIMGU_mgv1a020924mg	Mimulus guttatus	NA	translation[GO:0006412]	structural constituent of ribosome[GO:0003735]	ribosome[GO:0005840]	NA
TR35166|c0_g5_i3	46.669	2834.08	5.92427	4.13392e-06	0.0188672	Yes	PREDICTED: thioredoxin-like protein CDSP32, chloroplastic	Nicotiana sylvestris	NA	NA	NA	NA	NA
TR40235|c0_g7_i1	23.3345	1306.73	5.80735	1.77857e-06	0.0121761	Yes	PREDICTED: uncharacterized protein LOC105159766	Sesamum indicum	NA	NA	NA	NA	NA
TR34270|c2_g5_i1	16.9706	818.358	5.59163	3.70055e-06	0.0190005	Yes	NA	NA	NA	NA	NA	NA	NA
TR30451|c0_g2_i3	25.4558	1118.17	5.457	4.64693e-06	0.0190877	Yes	PREDICTED: 14 kDa proline-rich protein DC2.15-like	Erythranthe guttatus	NA	NA	NA	NA	NA
TR35271|c1_g2_i4	61.5183	2402.28	5.28724	1.59718e-05	0.0468613	Yes	SMLII	Salvia miltiorrhiza	NA	NA	NA	NA	NA
TR31605|c0_g1_i2	21.2132	712.764	5.07039	1.68791e-05	0.0462217	Yes	PREDICTED: protein FAM210B-like	Solanum tuberosum	NA	positive regulation of transcription, DNA-templated[GO:0045893] ; leaf morphogenesis[GO:0009965] ; phosphatidylinositol biosynthetic process[GO:0006661] ; cell differentiation[GO:0030154]	NA	chloroplast thylakoid membrane[GO:0009535]	NA
TR3102|c1_g1_i1	2358.91	60.3398	-5.28887	1.50558e-05	0.0475717	Yes	NA	NA	NA	NA	NA	NA	NA
TR37001|c0_g6_i2	668.216	15.0849	-5.46913	5.83167e-06	0.0217765	Yes	fructose-bisphosphate aldolase	Plantago major	NA	glycolytic process[GO:0006096]	fructose-bisphosphate aldolase activity[GO:0004332]	NA	map00030:Pentose phosphate pathway(aldolase[ec:4.1.2.13]) ; map01130:Biosynthesis of antibiotics(aldolase[ec:4.1.2.13]) ; map00051:Fructose and mannose metabolism(aldolase[ec:4.1.2.13]) ; map00710:Carbon fixation in photosynthetic organisms(aldolase[ec:4.1.2.13]) ; map00010:Glycolysis / Gluconeogenesis(aldolase[ec:4.1.2.13]) ; map00680:Methane metabolism(aldolase[ec:4.1.2.13])
TR2255|c10_g1_i1	1385.22	26.3987	-5.71351	2.25909e-06	0.0132563	Yes	lavandulyl diphsophate synthase	Lavandula x intermedia	NA	NA	NA	NA	NA
TR29823|c5_g2_i2	4140.82	67.8823	-5.93074	1.15349e-05	0.039484	Yes	SMLII	Salvia miltiorrhiza	NA	NA	NA	NA	NA
TR19875|c0_g1_i2	1005.51	15.0849	-6.05867	8.53808e-07	0.00876775	Yes	TPA: histone H3	Zea mays	NA	glucose catabolic process[GO:0006007] ; protein targeting[GO:0006605]	DNA binding[GO:0003677] ; protein heterodimerization activity[GO:0046982]	integral component of membrane[GO:0016021] ; nucleosome[GO:0000786] ; nucleus[GO:0005634]	NA
TR33839|c1_g4_i4	1813.73	26.3987	-6.10235	9.7697e-07	0.008026	Yes	NA	NA	NA	NA	NA	NA	NA
TR23832|c2_g1_i1	89.0955	6194.26	6.11944	2.90585e-05	0.0663115	No	GCS1_OCIBARecName: Full=Gamma-cadinene synthase; AltName: Full=(+)-gamma-cadinene synthase	Ocimum basilicum	Lamiaceae	terpenoid biosynthetic process[GO:0016114]	magnesium ion binding[GO:0000287] ; terpene synthase activity[GO:0010333]	NA	NA
TR25093|c1_g3_i1	97.5807	5185.45	5.73173	3.78826e-05	0.0707303	No	glycine-rich protein 1	Boea hygrometrica	NA	NA	NA	NA	NA
TR29261|c0_g1_i1	91.2168	3463.88	5.24695	4.00988e-05	0.071613	No	PREDICTED: tryptophan aminotransferase-related protein 4-like	Sesamum indicum	NA	NA	NA	NA	NA
TR33439|c0_g5_i5	127.279	4493.43	5.14175	0.000100612	0.0879306	No	chlorophyll a/b binding protein	Medicago sativa	NA	photosynthesis, light harvesting[GO:0009765] ; protein-chromophore linkage[GO:0018298]	metal ion binding[GO:0046872] ; chlorophyll binding[GO:0016168]	photosystem II[GO:0009523] ; integral component of membrane[GO:0016021] ; chloroplast[GO:0009507] ; photosystem I[GO:0009522]	NA
TR30741|c0_g8_i3	301.227	10504.8	5.12405	0.00123102	0.264741	No	PREDICTED: chlorophyll a-b binding protein 5, chloroplastic	Sesamum indicum	NA	NA	NA	NA	NA
TR1667|c0_g1_i1	86.9741	2901.97	5.0603	4.36805e-05	0.0717688	No	hypothetical protein MIMGU_mgv1a015996mg	Mimulus guttatus	NA	NA	NA	NA	NA
TR42502|c1_g1_i4	150.614	5013.86	5.057	0.000164311	0.0978151	No	PREDICTED: linoleate 13S-lipoxygenase 2-1, chloroplastic-like	Sesamum indicum	NA	NA	NA	NA	NA
TR24593|c0_g1_i8	140.007	4387.83	4.96994	0.000143153	0.0980025	No	PREDICTED: chlorophyll a-b binding protein, chloroplastic-like	Cucumis sativus	NA	photosynthesis, light harvesting[GO:0009765] ; protein-chromophore linkage[GO:0018298]	metal ion binding[GO:0046872] ; chlorophyll binding[GO:0016168]	photosystem II[GO:0009523] ; integral component of membrane[GO:0016021] ; chloroplast[GO:0009507] ; photosystem I[GO:0009522]	NA
TR42502|c1_g5_i1	99.7021	2903.85	4.8642	7.3642e-05	0.077562	No	PREDICTED: linoleate 13S-lipoxygenase 2-1, chloroplastic-like	Sesamum indicum	NA	NA	NA	NA	NA
TR34225|c0_g1_i3	44.5477	1236.97	4.79531	3.07916e-05	0.0632398	No	PREDICTED: uncharacterized protein LOC105177106	Sesamum indicum	NA	NA	NA	NA	NA
TR34481|c1_g2_i3	27.5772	735.391	4.73697	4.0783e-05	0.0698001	No	PREDICTED: uncharacterized protein LOC105170479	Sesamum indicum	NA	NA	NA	NA	NA
TR33439|c0_g13_i5	118.794	3052.82	4.68361	0.000130979	0.0978199	No	PREDICTED: chlorophyll a-b binding protein of LHCII type 1-like	Glycine max	NA	response to light stimulus[GO:0009416] ; protein-chromophore linkage[GO:0018298] ; photosynthesis, light harvesting in photosystem I[GO:0009768]	chlorophyll binding[GO:0016168] ; pigment binding[GO:0031409]	integral component of membrane[GO:0016021] ; chloroplast envelope[GO:0009941] ; chloroplast thylakoid membrane[GO:0009535] ; photosystem II[GO:0009523] ; plastoglobule[GO:0010287]	NA
TR28566|c0_g1_i2	70.0036	1753.62	4.64677	5.94922e-05	0.0740516	No	PREDICTED: uncharacterized protein LOC105159891	Sesamum indicum	NA	NA	NA	NA	NA
TR42436|c0_g1_i1	16.9706	424.264	4.64386	9.00626e-05	0.0840775	No	NA	NA	NA	NA	NA	NA	NA
TR26397|c1_g4_i2	93.3381	2330.62	4.64211	8.92124e-05	0.0852207	No	NA	NA	NA	NA	NA	NA	NA
TR30751|c1_g2_i4	65.7609	1640.49	4.64075	5.66893e-05	0.0727678	No	PREDICTED: ferritin-3, chloroplastic	Sesamum indicum	NA	NA	NA	NA	NA
TR31236|c7_g3_i1	50.9117	1269.02	4.63958	4.84694e-05	0.0711046	No	polyubiquitin	Lemna minor	NA	NA	NA	NA	NA
TR31788|c0_g1_i2	133.643	3286.63	4.62015	0.000178868	0.103481	No	NA	NA	NA	NA	NA	NA	NA
TR42641|c0_g17_i2	40.3051	986.178	4.61281	5.10434e-05	0.0722986	No	pyrophosphatase, partial	Solanum pimpinellifolium	NA	metabolic process[GO:0008152] ; proton transport[GO:0015992] ; transmembrane transport[GO:0055085]	inorganic diphosphatase activity[GO:0004427] ; hydrogen-translocating pyrophosphatase activity[GO:0009678]	integral component of membrane[GO:0016021]	map00190:Oxidative phosphorylation(diphosphatase[ec:3.6.1.1])
TR42502|c1_g3_i8	36.0624	869.27	4.59124	5.59983e-05	0.0741996	No	NA	NA	NA	NA	NA	NA	NA
TR24857|c0_g1_i1	25.4558	610.94	4.58496	7.13946e-05	0.0792596	No	NA	NA	NA	NA	NA	NA	NA
TR29763|c3_g1_i2	57.2756	1359.53	4.56904	6.10513e-05	0.0737572	No	NA	NA	NA	NA	NA	NA	NA
TR36875|c1_g5_i8	186.676	4401.03	4.55923	0.000385986	0.149573	No	PREDICTED: oxygen-evolving enhancer protein 1, chloroplastic-like	Sesamum indicum	NA	NA	NA	NA	NA
TR33321|c4_g1_i4	116.673	2739.8	4.55353	0.000150504	0.0951093	No	PREDICTED: flavanone 3-dioxygenase-like	Sesamum indicum	NA	NA	NA	NA	NA
TR35882|c0_g2_i1	29.6985	692.022	4.54236	7.237e-05	0.0782282	No	PREDICTED: 30S ribosomal protein 2, chloroplastic	Sesamum indicum	NA	NA	NA	NA	NA
TR34392|c0_g2_i2	19.0919	443.12	4.53667	0.000112445	0.0905645	No	hypothetical protein MIMGU_mgv1a015732mg	Mimulus guttatus	NA	cell redox homeostasis[GO:0045454] ; oxidation-reduction process[GO:0055114]	flavin adenine dinucleotide binding[GO:0050660] ; oxidoreductase activity[GO:0016491]	cell[GO:0005623]	NA
TR37300|c2_g4_i3	42.4264	976.75	4.52496	6.55344e-05	0.0747748	No	hypothetical protein MIMGU_mgv1a008741mg	Mimulus guttatus	NA	metabolic process[GO:0008152]	carbon-sulfur lyase activity[GO:0016846]	NA	NA
TR40235|c0_g9_i5	23.3345	535.516	4.52039	9.62221e-05	0.0859222	No	NA	NA	NA	NA	NA	NA	NA
TR31943|c0_g1_i2	31.8198	729.734	4.51937	7.44471e-05	0.0764497	No	PREDICTED: protein E6-like	Sesamum indicum	NA	NA	NA	NA	NA
TR33468|c0_g2_i1	80.6102	1810.19	4.48904	9.61728e-05	0.0877865	No	PREDICTED: peptidyl-prolyl cis-trans isomerase FKBP17-2, chloroplastic	Sesamum indicum	NA	NA	NA	NA	NA
TR31115|c0_g4_i2	19.0919	428.035	4.4867	0.000132133	0.0969196	No	hypothetical protein M569_05080, partial	Genlisea aurea	NA	NA	calcium ion binding[GO:0005509]	NA	NA
TR39143|c1_g6_i7	103.945	2240.11	4.42968	0.000150063	0.0963123	No	alpha tubulin	Plantago major	NA	microtubule-based process[GO:0007017] ; metabolic process[GO:0008152]	structural constituent of cytoskeleton[GO:0005200] ; GTP binding[GO:0005525] ; GTPase activity[GO:0003924]	microtubule[GO:0005874]	NA
TR40516|c0_g1_i4	152.735	3220.64	4.39824	0.000303932	0.128704	No	PREDICTED: stachyose synthase	Sesamum indicum	NA	NA	NA	NA	NA
TR2497|c0_g3_i1	186.676	3922.09	4.39301	0.000451636	0.162732	No	lipid transfer protein 1	Salvia miltiorrhiza	NA	lipid transport[GO:0006869]	lipid binding[GO:0008289]	NA	NA
TR38496|c1_g1_i3	67.8823	1412.33	4.3789	0.000107202	0.0898659	No	hypothetical protein MIMGU_mgv1a006158mg	Mimulus guttatus	NA	NA	NA	NA	NA
TR2523|c0_g3_i2	42.4264	878.698	4.37233	0.000103037	0.0881739	No	PREDICTED: chlorophyll a-b binding protein 21, chloroplastic-like	Sesamum indicum	NA	NA	NA	NA	NA
TR31419|c2_g1_i2	38.1838	790.074	4.37096	0.000107543	0.0883487	No	hypothetical protein MIMGU_mgv1a014196mg	Mimulus guttatus	NA	NA	NA	NA	NA
TR2178|c4_g2_i1	14.8492	305.47	4.36257	0.00025941	0.123901	No	PREDICTED: uncharacterized protein LOC105169690	Sesamum indicum	NA	NA	NA	NA	NA
TR35055|c0_g2_i2	386.08	7917.71	4.35811	0.00237135	0.351645	No	PREDICTED: thiamine thiazole synthase 1, chloroplastic	Eucalyptus grandis	NA	NA	NA	NA	NA
TR30351|c0_g2_i1	36.0624	722.192	4.32381	0.000128128	0.0974627	No	PREDICTED: elongation factor 1-alpha-like	Gossypium raimondii	NA	NA	NA	NA	NA
TR36023|c0_g5_i1	19.0919	380.895	4.31836	0.000224303	0.116626	No	PREDICTED: uncharacterized protein LOC105178033	Sesamum indicum	NA	NA	NA	NA	NA
TR34379|c0_g4_i2	188.798	3765.58	4.31796	0.000500802	0.171425	No	PREDICTED: proline-rich protein 4	Sesamum indicum	NA	NA	NA	NA	NA
TR36283|c0_g8_i1	40.3051	799.502	4.31007	0.000126687	0.0981848	No	hypothetical protein EUGRSUZ_I02449	Eucalyptus grandis	NA	NA	NA	NA	NA
TR33116|c0_g2_i3	89.0955	1742.31	4.28951	0.000162212	0.100955	No	PREDICTED: peptide methionine sulfoxide reductase A1-like	Sesamum indicum	NA	NA	NA	NA	NA
TR34005|c0_g3_i4	12.7279	247.016	4.27854	0.000408104	0.153792	No	NA	NA	NA	NA	NA	NA	NA
TR7878|c0_g12_i1	72.1249	1385.93	4.26421	0.000147049	0.0990194	No	PREDICTED: protein EARLY RESPONSIVE TO DEHYDRATION 15	Sesamum indicum	NA	NA	NA	NA	NA
TR30871|c0_g1_i1	252.437	4825.3	4.25662	0.000954432	0.242002	No	heat shock protein 70	Genlisea aurea	NA	NA	ATP binding[GO:0005524]	NA	NA
TR40759|c2_g1_i2	78.4889	1476.44	4.23349	0.000166426	0.0976588	No	PREDICTED: beta-D-xylosidase 1	Sesamum indicum	NA	NA	NA	NA	NA
TR34225|c0_g1_i8	14.8492	279.071	4.23217	0.000393624	0.151107	No	hypothetical protein JCGZ_09570	Jatropha curcas	NA	NA	NA	NA	NA
TR35332|c0_g8_i1	21.2132	395.98	4.22239	0.000275296	0.128501	No	hypothetical protein MIMGU_mgv1a014477mg	Mimulus guttatus	NA	NA	NA	integral component of membrane[GO:0016021]	NA
TR34419|c0_g1_i4	59.397	1091.77	4.20014	0.00016405	0.100575	No	PREDICTED: BI1-like protein	Sesamum indicum	NA	NA	NA	NA	NA
TR33439|c0_g2_i1	250.316	4550	4.18404	0.00100126	0.246274	No	hypothetical protein PHAVU_004G093100g	Phaseolus vulgaris	NA	photosynthesis, light harvesting[GO:0009765] ; protein-chromophore linkage[GO:0018298]	chlorophyll binding[GO:0016168]	photosystem II[GO:0009523] ; integral component of membrane[GO:0016021] ; chloroplast[GO:0009507]	NA
TR23940|c0_g1_i1	99.7021	1798.88	4.17333	0.000231845	0.117571	No	putative ethylene-responsive element binding protein	Salvia miltiorrhiza	NA	NA	NA	NA	NA
TR30137|c0_g1_i10	23.3345	418.607	4.16506	0.000302994	0.129644	No	PREDICTED: photosystem I reaction center subunit psaK, chloroplastic	Sesamum indicum	NA	NA	NA	NA	NA
TR36101|c0_g1_i8	156.978	2798.26	4.1559	0.00044566	0.161999	No	PREDICTED: uncharacterized protein LOC105158378	Sesamum indicum	NA	NA	NA	NA	NA
TR21902|c0_g1_i1	27.5772	486.489	4.14086	0.000282499	0.127516	No	NA	NA	NA	NA	NA	NA	NA
TR26397|c1_g2_i1	74.2462	1306.73	4.1375	0.000204976	0.112261	No	FER1_PEARecName: Full=Ferredoxin-1, chloroplastic; AltName: Full=Ferredoxin I; Flags: Precursor	Pisum sativum	NA	electron transport chain[GO:0022900]	metal ion binding[GO:0046872] ; electron carrier activity[GO:0009055] ; 2 iron, 2 sulfur cluster binding[GO:0051537] ; protein binding[GO:0005515]	chloroplast[GO:0009507]	NA
TR31283|c0_g3_i3	99.7021	1751.74	4.13502	0.000251451	0.12296	No	PREDICTED: uncharacterized protein LOC105160017	Sesamum indicum	NA	NA	NA	NA	NA
TR43910|c2_g6_i1	55.1543	967.322	4.13245	0.000198483	0.110174	No	PREDICTED: glycine dehydrogenase [decarboxylating], mitochondrial-like, partial	Glycine max	NA	NA	NA	NA	NA
TR39740|c2_g5_i3	44.5477	780.646	4.13124	0.00020986	0.113424	No	NA	NA	NA	NA	NA	NA	NA
TR42025|c0_g2_i1	14.8492	258.33	4.12075	0.000555105	0.176756	No	PREDICTED: LOW QUALITY PROTEIN: interactor of constitutive active ROPs 3	Sesamum indicum	NA	NA	NA	NA	NA
TR33439|c0_g6_i2	91.2168	1580.15	4.11462	0.000244019	0.120763	No	hypothetical protein MIMGU_mgv1a012019mg	Mimulus guttatus	NA	photosynthesis, light harvesting[GO:0009765] ; protein-chromophore linkage[GO:0018298]	metal ion binding[GO:0046872] ; chlorophyll binding[GO:0016168]	photosystem II[GO:0009523] ; integral component of membrane[GO:0016021] ; chloroplast[GO:0009507] ; photosystem I[GO:0009522]	NA
TR42502|c1_g3_i7	19.0919	328.098	4.10309	0.00044051	0.161557	No	hypothetical protein MIMGU_mgv1a000979mg	Mimulus guttatus	NA	oxylipin biosynthetic process[GO:0031408] ; oxidation-reduction process[GO:0055114]	metal ion binding[GO:0046872] ; oxidoreductase activity, acting on single donors with incorporation of molecular oxygen, incorporation of two atoms of oxygen[GO:0016702]	NA	NA
TR39227|c1_g2_i2	67.8823	1155.88	4.08982	0.000226021	0.11605	No	PREDICTED: F-box protein At3g07870-like	Sesamum indicum	NA	NA	NA	NA	NA
TR23138|c0_g1_i1	373.352	6354.53	4.08918	0.00245814	0.354283	No	NA	NA	NA	NA	NA	NA	NA
TR42502|c1_g3_i3	65.7609	1106.86	4.0731	0.000235253	0.117845	No	hypothetical protein MIMGU_mgv1a000979mg	Mimulus guttatus	NA	oxylipin biosynthetic process[GO:0031408] ; oxidation-reduction process[GO:0055114]	metal ion binding[GO:0046872] ; oxidoreductase activity, acting on single donors with incorporation of molecular oxygen, incorporation of two atoms of oxygen[GO:0016702]	NA	NA
TR30109|c0_g2_i2	574.878	9667.56	4.07183	0.00630179	0.493993	No	PREDICTED: auxin-binding protein ABP19a-like	Sesamum indicum	NA	NA	NA	NA	NA
TR30741|c0_g8_i1	301.227	5034.6	4.06295	0.00161313	0.298473	No	chlorophyll a/b-binding protein	Tagetes erecta	NA	photosynthesis, light harvesting[GO:0009765] ; protein-chromophore linkage[GO:0018298]	metal ion binding[GO:0046872] ; chlorophyll binding[GO:0016168]	photosystem II[GO:0009523] ; integral component of membrane[GO:0016021] ; chloroplast[GO:0009507] ; photosystem I[GO:0009522]	NA
TR33439|c0_g5_i15	623.668	10216.3	4.03395	0.00755228	0.522251	No	NA	NA	NA	NA	NA	NA	NA
TR30882|c0_g2_i1	36.0624	582.656	4.01408	0.000340223	0.13975	No	PREDICTED: phosphoethanolamine N-methyltransferase-like isoform X2	Sesamum indicum	NA	NA	NA	NA	NA
TR34005|c0_g3_i2	61.5183	984.293	4	0.00028745	0.12834	No	NA	NA	NA	NA	NA	NA	NA
TR38704|c1_g2_i3	133.643	2134.52	3.99745	0.000457548	0.163428	No	hypothetical protein MIMGU_mgv1a006920mg	Mimulus guttatus	NA	protein folding[GO:0006457]	unfolded protein binding[GO:0051082] ; calcium ion binding[GO:0005509]	endoplasmic reticulum[GO:0005783]	NA
TR39035|c0_g1_i2	1213.4	19367.2	3.99649	0.0285942	0.751461	No	hypothetical protein MIMGU_mgv1a005412mg	Mimulus guttatus	NA	proteolysis[GO:0006508]	peptidase activity[GO:0008233]	NA	NA
TR21800|c0_g1_i1	40.3051	637.339	3.98303	0.000348019	0.141537	No	hypothetical protein MIMGU_mgv1a011266mg	Mimulus guttatus	NA	cell wall organization[GO:0071555] ; xyloglucan metabolic process[GO:0010411] ; cell wall biogenesis[GO:0042546]	xyloglucan:xyloglucosyl transferase activity[GO:0016762] ; hydrolase activity, hydrolyzing O-glycosyl compounds[GO:0004553]	cell wall[GO:0005618] ; apoplast[GO:0048046]	NA
TR3863|c0_g1_i2	14.8492	228.16	3.94158	0.000932929	0.242538	No	hypothetical protein MIMGU_mgv1a015081mg	Mimulus guttatus	NA	NA	calcium ion binding[GO:0005509]	NA	NA
TR44439|c0_g2_i1	2244.36	33797.8	3.91256	0.0879565	0.937198	No	PREDICTED: alpha-glucan water dikinase, chloroplastic-like	Sesamum indicum	NA	NA	NA	NA	NA
TR25573|c1_g1_i2	46.669	701.45	3.9098	0.000402971	0.153263	No	NA	NA	NA	NA	NA	NA	NA
TR28256|c0_g1_i1	396.687	5886.9	3.89144	0.00318116	0.390058	No	PREDICTED: photosystem II reaction center W protein, chloroplastic-like	Nicotiana sylvestris	NA	NA	NA	NA	NA
TR2701|c1_g1_i1	38.1838	565.685	3.88897	0.000483823	0.169859	No	NA	NA	NA	NA	NA	NA	NA
TR42331|c0_g4_i8	46.669	688.251	3.8824	0.000437914	0.162052	No	PREDICTED: uncharacterized protein LOC105167066	Sesamum indicum	NA	NA	NA	NA	NA
TR43187|c2_g1_i4	31.8198	463.862	3.8657	0.000596009	0.178698	No	hypothetical protein MIMGU_mgv1a002615mg	Mimulus guttatus	NA	transmembrane transport[GO:0055085]	NA	integral component of membrane[GO:0016021]	NA
TR3950|c0_g1_i2	40.3051	582.656	3.85361	0.000520581	0.172447	No	PREDICTED: thiosulfate sulfurtransferase 16, chloroplastic	Sesamum indicum	NA	NA	NA	NA	NA
TR31831|c1_g2_i1	1274.91	18373.5	3.84915	0.0311317	0.767105	No	PREDICTED: chlorophyll a-b binding protein 6, chloroplastic-like	Malus domestica	NA	NA	NA	NA	NA
TR31386|c0_g1_i3	127.279	1821.51	3.83906	0.00059226	0.17888	No	PREDICTED: psbQ-like protein 1, chloroplastic	Sesamum indicum	NA	NA	NA	NA	NA
TR42649|c2_g7_i1	82.7315	1180.4	3.83469	0.000465079	0.164686	No	NA	NA	NA	NA	NA	NA	NA
TR31294|c0_g2_i4	23.3345	331.869	3.83007	0.000841075	0.227289	No	NA	NA	NA	NA	NA	NA	NA
TR33439|c0_g5_i11	260.922	3703.35	3.82714	0.00160575	0.298452	No	PREDICTED: chlorophyll a-b binding protein 21, chloroplastic-like	Sesamum indicum	NA	NA	NA	NA	NA
TR37039|c0_g4_i1	21.2132	299.813	3.82103	0.000949249	0.243696	No	PREDICTED: serine/arginine-rich splicing factor RS40 isoform X2	Sesamum indicum	NA	NA	NA	NA	NA
TR44246|c1_g5_i2	57.2756	808.93	3.82002	0.000488746	0.168704	No	PREDICTED: elongation factor G-1, chloroplastic	Sesamum indicum	NA	NA	NA	NA	NA
TR43015|c0_g1_i3	103.945	1453.81	3.80595	0.000547948	0.177225	No	hypothetical protein MIMGU_mgv1a026830mg	Mimulus guttatus	NA	phosphorylation[GO:0016310]	protein kinase activity[GO:0004672] ; nucleotide binding[GO:0000166]	membrane[GO:0016020]	NA
TR43188|c0_g4_i2	116.673	1589.58	3.7681	0.000643928	0.191667	No	PREDICTED: phosphoglucan, water dikinase, chloroplastic	Sesamum indicum	NA	NA	NA	NA	NA
TR3126|c0_g1_i2	313.955	4276.58	3.76783	0.00234277	0.352496	No	PREDICTED: CBS domain-containing protein CBSX1, chloroplastic	Sesamum indicum	NA	NA	NA	NA	NA
TR33176|c0_g2_i5	16.9706	230.045	3.76081	0.00139174	0.281611	No	NA	NA	NA	NA	NA	NA	NA
TR42013|c1_g2_i5	25.4558	345.068	3.76081	0.00096153	0.242306	No	PREDICTED: protein BPS1, chloroplastic-like	Sesamum indicum	NA	NA	NA	NA	NA
TR28327|c0_g1_i2	65.7609	890.012	3.75852	0.000567528	0.177953	No	hypothetical protein MIMGU_mgv1a025794mg	Mimulus guttatus	NA	NA	NA	NA	NA
TR35411|c0_g1_i4	70.0036	944.695	3.75435	0.000570611	0.176229	No	hypothetical protein MIMGU_mgv1a020989mg	Mimulus guttatus	NA	NA	transferase activity[GO:0016740]	NA	NA
TR35824|c1_g1_i1	12.7279	171.591	3.75291	0.00164713	0.302042	No	Histone H2B.3	Morus notabilis	NA	NA	protein heterodimerization activity[GO:0046982] ; DNA binding[GO:0003677]	nucleosome[GO:0000786] ; nucleus[GO:0005634]	NA
TR26416|c1_g1_i1	485.782	6544.98	3.75201	0.00519313	0.459726	No	NA	NA	NA	NA	NA	NA	NA
TR40973|c1_g1_i1	86.9741	1169.08	3.74865	0.000589764	0.179446	No	hypothetical protein MIMGU_mgv1a002252mg	Mimulus guttatus	NA	transmembrane transport[GO:0055085]	NA	integral component of membrane[GO:0016021]	NA
TR41447|c3_g3_i2	23.3345	313.013	3.74568	0.00108822	0.253975	No	hypothetical protein MIMGU_mgv1a008790mg	Mimulus guttatus	NA	NA	zinc ion binding[GO:0008270]	NA	NA
TR33180|c1_g1_i4	190.919	2532.39	3.72947	0.00116923	0.256831	No	NA	NA	NA	NA	NA	NA	NA
TR36380|c0_g1_i1	16.9706	224.389	3.72489	0.00153484	0.289197	No	PREDICTED: probable 2-carboxy-D-arabinitol-1-phosphatase	Sesamum indicum	NA	NA	NA	NA	NA
TR34265|c3_g3_i1	25.4558	331.869	3.70454	0.00113903	0.258491	No	NA	NA	NA	NA	NA	NA	NA
TR41286|c1_g1_i1	424.264	5509.78	3.69896	0.00422645	0.440624	No	unnamed protein product	Coffea canephora	NA	NA	kinase activity[GO:0016301]	NA	NA
TR38762|c0_g3_i4	44.5477	575.114	3.69042	0.000807087	0.225523	No	NA	NA	NA	NA	NA	NA	NA
TR40777|c4_g13_i6	16.9706	214.96	3.66297	0.00180866	0.314799	No	NA	NA	NA	NA	NA	NA	NA
TR19383|c0_g1_i2	46.669	586.427	3.65141	0.000883818	0.231234	No	adenosylhomocysteinase, partial	Genlisea aurea	NA	one-carbon metabolic process[GO:0006730]	adenosylhomocysteinase activity[GO:0004013]	NA	map00270:Cysteine and methionine metabolism(S-adenosylhomocysteine synthase[ec:3.3.1.1])
TR7319|c0_g5_i1	120.915	1512.27	3.64464	0.000875636	0.232049	No	metallothionin 3	Salvia miltiorrhiza	NA	NA	NA	NA	NA
TR3950|c0_g1_i3	131.522	1634.83	3.63577	0.000944743	0.244065	No	hypothetical protein MIMGU_mgv1a014589mg	Mimulus guttatus	NA	NA	NA	NA	NA
TR30771|c1_g1_i4	89.0955	1103.09	3.63005	0.000809999	0.224808	No	PREDICTED: pleiotropic drug resistance protein 2-like, partial	Erythranthe guttatus	NA	NA	NA	NA	NA
TR33095|c1_g2_i1	38.1838	471.405	3.62593	0.00108659	0.255044	No	NA	NA	NA	NA	NA	NA	NA
TR42531|c0_g1_i1	1448.86	17734.2	3.61355	0.0393563	0.800296	No	unnamed protein product	Coffea canephora	NA	carbohydrate metabolic process[GO:0005975]	pyridoxal phosphate binding[GO:0030170] ; glycogen phosphorylase activity[GO:0008184]	NA	NA
TR43406|c1_g1_i1	61.5183	752.362	3.61234	0.000878273	0.231256	No	PREDICTED: AMP deaminase-like isoform X2	Sesamum indicum	NA	NA	NA	NA	NA
TR7708|c3_g5_i1	16.9706	207.418	3.61143	0.00206397	0.331171	No	hypothetical protein MIMGU_mgv1a011200mg	Mimulus guttatus	NA	metabolic process[GO:0008152]	amino acid binding[GO:0016597]	NA	NA
TR40781|c0_g1_i5	23.3345	282.843	3.59946	0.00168895	0.305618	No	PREDICTED: GTPase Era, mitochondrial	Sesamum indicum	NA	NA	NA	NA	NA
TR37395|c0_g2_i4	16.9706	205.532	3.59826	0.0021334	0.339656	No	NA	NA	NA	NA	NA	NA	NA
TR42502|c1_g3_i1	617.304	7374.65	3.57852	0.00909119	0.559865	No	PREDICTED: linoleate 13S-lipoxygenase 2-1, chloroplastic-like	Sesamum indicum	NA	NA	NA	NA	NA
TR38734|c0_g3_i2	258.801	3088.64	3.57706	0.00224815	0.34329	No	hypothetical protein MIMGU_mgv1a006915mg	Mimulus guttatus	NA	metabolic process[GO:0008152]	catalytic activity[GO:0003824]	NA	NA
TR27424|c1_g1_i6	184.555	2192.97	3.57077	0.00148068	0.286888	No	PREDICTED: transketolase, chloroplastic	Sesamum indicum	NA	NA	NA	NA	NA
TR33905|c0_g2_i4	135.765	1612.2	3.56986	0.00111956	0.256912	No	PREDICTED: uncharacterized protein LOC105164617 isoform X1	Sesamum indicum	NA	NA	NA	NA	NA
TR44165|c1_g12_i2	29.6985	352.611	3.56961	0.00150762	0.288033	No	predicted protein	Hordeum vulgare subsp. vulgare	NA	NA	ATP binding[GO:0005524]	NA	NA
TR39740|c2_g4_i1	12.7279	150.849	3.56704	0.00257823	0.358994	No	PREDICTED: delta(8)-fatty-acid desaturase-like	Sesamum indicum	NA	NA	NA	NA	NA
TR19514|c0_g1_i1	70.0036	829.672	3.56704	0.000969131	0.242732	No	PREDICTED: calcium-binding protein KIC-like	Sesamum indicum	NA	NA	NA	NA	NA
TR7878|c0_g2_i3	29.6985	350.725	3.56188	0.00154201	0.289222	No	PREDICTED: protein EARLY RESPONSIVE TO DEHYDRATION 15	Sesamum indicum	NA	NA	NA	NA	NA
TR31690|c0_g1_i5	46.669	550.6	3.56047	0.00116338	0.258309	No	NA	NA	NA	NA	NA	NA	NA
TR43014|c4_g4_i2	48.7904	575.114	3.55918	0.00113802	0.259696	No	SAHH1, partial	Matthiola fruticulosa subsp. valesiaca	NA	one-carbon metabolic process[GO:0006730]	adenosylhomocysteinase activity[GO:0004013]	NA	map00270:Cysteine and methionine metabolism(S-adenosylhomocysteine synthase[ec:3.3.1.1])
TR42641|c0_g11_i1	57.2756	675.051	3.559	0.0010527	0.251399	No	NA	NA	NA	NA	NA	NA	NA
TR3435|c2_g8_i1	61.5183	722.192	3.55329	0.00104286	0.250506	No	hypothetical protein MIMGU_mgv1a026895mg	Mimulus guttatus	NA	NA	NA	NA	NA
TR34801|c1_g2_i1	36.0624	422.378	3.54997	0.00141522	0.280829	No	PREDICTED: nuclear transcription factor Y subunit B-3-like	Sesamum indicum	NA	NA	NA	NA	NA
TR40403|c0_g2_i2	258.801	3030.19	3.54949	0.0023444	0.351454	No	PREDICTED: glycosylphosphatidylinositol anchor attachment 1 protein	Sesamum indicum	NA	NA	NA	NA	NA
TR38499|c2_g4_i4	25.4558	297.928	3.54889	0.00181503	0.314574	No	PREDICTED: putative UPF0481 protein At3g02645	Sesamum indicum	NA	NA	NA	NA	NA
TR17269|c0_g2_i1	840.043	9825.96	3.54806	0.0159165	0.655097	No	PREDICTED: photosystem II 10 kDa polypeptide, chloroplastic	Sesamum indicum	NA	NA	NA	NA	NA
TR38005|c0_g1_i1	369.11	4280.35	3.53561	0.00398607	0.433153	No	PREDICTED: BTB/POZ domain-containing protein At2g30600	Sesamum indicum	NA	NA	NA	NA	NA
TR41447|c3_g1_i3	74.2462	859.842	3.53368	0.00105465	0.250408	No	hypothetical protein MIMGU_mgv1a008790mg	Mimulus guttatus	NA	NA	zinc ion binding[GO:0008270]	NA	NA
TR37855|c1_g2_i1	95.4594	1095.54	3.52062	0.00109293	0.253635	No	PREDICTED: uncharacterized protein LOC105155746	Sesamum indicum	NA	NA	NA	NA	NA
TR36764|c0_g5_i7	29.6985	339.411	3.51457	0.0017704	0.313453	No	PREDICTED: probable 3-hydroxyisobutyrate dehydrogenase-like 1, mitochondrial	Sesamum indicum	NA	NA	NA	NA	NA
TR40103|c0_g2_i1	21.2132	241.359	3.50815	0.00237839	0.35142	No	PREDICTED: UPF0051 protein ABCI8, chloroplastic	Sesamum indicum	NA	NA	NA	NA	NA
TR39534|c4_g1_i4	42.4264	482.718	3.50815	0.00144372	0.283743	No	NA	NA	NA	NA	NA	NA	NA
TR7858|c0_g3_i2	161.22	1829.05	3.50399	0.00147432	0.28701	No	NA	NA	NA	NA	NA	NA	NA
TR34662|c0_g1_i1	78.4889	890.012	3.50326	0.00114058	0.257421	No	PREDICTED: uncharacterized protein LOC105166195	Sesamum indicum	NA	NA	NA	NA	NA
TR37634|c0_g4_i2	146.371	1651.8	3.49634	0.00138962	0.282574	No	PREDICTED: uncharacterized protein LOC105171465	Sesamum indicum	NA	NA	NA	NA	NA
TR43848|c1_g1_i6	82.7315	933.381	3.49596	0.00115948	0.258842	No	hypothetical protein CISIN_1g0038272mg, partial	Citrus sinensis	NA	protein folding[GO:0006457] ; response to stress[GO:0006950]	ATP binding[GO:0005524] ; unfolded protein binding[GO:0051082]	NA	NA
TR28102|c0_g4_i1	19.0919	214.96	3.49304	0.00264472	0.35853	No	NA	NA	NA	NA	NA	NA	NA
TR7805|c1_g8_i5	80.6102	906.982	3.49204	0.0011739	0.256484	No	PREDICTED: photosystem II 22 kDa protein, chloroplastic-like	Cicer arietinum	NA	NA	NA	NA	NA
TR30882|c0_g3_i1	53.033	595.855	3.49	0.00133744	0.277458	No	PREDICTED: phosphoethanolamine N-methyltransferase 1-like	Sesamum indicum	NA	NA	NA	NA	NA
TR38271|c0_g3_i1	27.5772	309.241	3.48719	0.0020339	0.331525	No	NA	NA	NA	NA	NA	NA	NA
TR34270|c2_g4_i1	159.099	1783.79	3.48695	0.00151111	0.287363	No	NA	NA	NA	NA	NA	NA	NA
TR35089|c0_g1_i1	350.018	3914.54	3.48334	0.00393067	0.432858	No	PREDICTED: CBS domain-containing protein CBSX3, mitochondrial-like	Sesamum indicum	NA	NA	NA	NA	NA
TR28750|c1_g1_i4	333.047	3673.18	3.46323	0.00376036	0.426687	No	Oxygen-evolving enhancer protein 3-1	Populus trichocarpa	NA	photosynthesis[GO:0015979]	calcium ion binding[GO:0005509]	photosystem II oxygen evolving complex[GO:0009654] ; extrinsic component of membrane[GO:0019898]	NA
TR29515|c0_g1_i3	21.2132	233.817	3.46234	0.00269691	0.35967	No	NA	NA	NA	NA	NA	NA	NA
TR40656|c0_g4_i1	29.6985	324.326	3.44898	0.00214427	0.338762	No	PREDICTED: uncharacterized protein LOC101258883	Solanum lycopersicum	NA	NA	NA	integral component of membrane[GO:0016021]	NA
TR41789|c0_g1_i2	25.4558	277.186	3.44478	0.00246228	0.353638	No	NA	NA	NA	NA	NA	NA	NA
TR34503|c1_g2_i4	78.4889	854.185	3.44399	0.00134529	0.277685	No	PREDICTED: fructose-bisphosphate aldolase 1, chloroplastic	Sesamum indicum	NA	NA	NA	NA	NA
TR3582|c0_g3_i4	260.922	2837.86	3.44311	0.00280039	0.366333	No	hypothetical protein M569_07040, partial	Genlisea aurea	NA	NA	NA	NA	NA
TR31615|c0_g2_i3	241.831	2626.67	3.44116	0.00255892	0.358737	No	PREDICTED: oxygen-evolving enhancer protein 3, chloroplastic	Sesamum indicum	NA	NA	NA	NA	NA
TR34230|c0_g1_i6	42.4264	460.091	3.43888	0.00177224	0.311096	No	hypothetical protein MIMGU_mgv1a003894mg	Mimulus guttatus	NA	transmembrane transport[GO:0055085]	NA	integral component of membrane[GO:0016021]	NA
TR37194|c1_g1_i4	14.8492	160.278	3.43211	0.00338759	0.404502	No	Senescence-associated protein, putative	Solanum demissum	NA	NA	NA	integral component of membrane[GO:0016021]	NA
TR32606|c0_g1_i2	70.0036	754.247	3.42954	0.00143339	0.283067	No	PREDICTED: UDP-glycosyltransferase 74E2-like	Sesamum indicum	NA	NA	NA	NA	NA
TR38704|c1_g1_i1	347.897	3718.44	3.41797	0.00425057	0.442016	No	hypothetical protein MIMGU_mgv1a006920mg	Mimulus guttatus	NA	protein folding[GO:0006457]	unfolded protein binding[GO:0051082] ; calcium ion binding[GO:0005509]	endoplasmic reticulum[GO:0005783]	NA
TR42531|c0_g1_i5	1033.08	11029	3.41627	0.0238732	0.733443	No	NA	NA	NA	NA	NA	NA	NA
TR44131|c4_g12_i1	12.7279	135.765	3.41504	0.00360799	0.423434	No	PREDICTED: heat shock 70 kDa protein 14-like	Sesamum indicum	NA	NA	NA	NA	NA
TR34275|c0_g3_i4	876.105	9239.53	3.39864	0.0184638	0.68142	No	chloroplast ferredoxin-NADP+ oxidoreductase precursor	Capsicum annuum	NA	oxidation-reduction process[GO:0055114]	ferredoxin-NADP+ reductase activity[GO:0004324] ; nucleotide binding[GO:0000166]	NA	map00195:Photosynthesis(reductase[ec:1.18.1.2])
TR40715|c0_g5_i1	23.3345	245.13	3.39301	0.00305248	0.383436	No	PREDICTED: LOW QUALITY PROTEIN: DELLA protein GAI	Sesamum indicum	NA	NA	NA	NA	NA
TR28903|c0_g2_i1	50.9117	533.63	3.38977	0.00183922	0.317427	No	hypothetical protein CICLE_v10004755mg	Citrus clementina	NA	microtubule-based process[GO:0007017] ; metabolic process[GO:0008152]	structural constituent of cytoskeleton[GO:0005200] ; GTP binding[GO:0005525] ; GTPase activity[GO:0003924]	microtubule[GO:0005874]	NA
TR42641|c0_g2_i1	159.099	1666.89	3.38916	0.00186485	0.316532	No	NA	NA	NA	NA	NA	NA	NA
TR39786|c0_g1_i1	246.073	2562.55	3.38042	0.00289511	0.369315	No	PREDICTED: uncharacterized aarF domain-containing protein kinase At1g79600, chloroplastic	Sesamum indicum	NA	NA	NA	NA	NA
TR33654|c0_g9_i4	21.2132	220.617	3.37851	0.00337074	0.403663	No	PREDICTED: uncharacterized protein LOC105179131	Sesamum indicum	NA	NA	NA	NA	NA
TR2326|c0_g1_i8	31.8198	329.983	3.3744	0.00253014	0.358373	No	PREDICTED: uncharacterized protein LOC105177873	Sesamum indicum	NA	NA	NA	NA	NA
TR33020|c0_g6_i4	70.0036	724.077	3.37064	0.00169495	0.305359	No	NA	NA	NA	NA	NA	NA	NA
TR37411|c0_g4_i1	70.0036	722.192	3.36688	0.00171318	0.307296	No	hydroxypyruvate reductase	Solenostemon scutellarioides	NA	oxidation-reduction process[GO:0055114]	NAD binding[GO:0051287] ; glycerate dehydrogenase activity[GO:0008465]	NA	map00260:Glycine, serine and threonine metabolism(dehydrogenase[ec:1.1.1.29]) ; map00630:Glyoxylate and dicarboxylate metabolism(dehydrogenase[ec:1.1.1.29]) ; map01130:Biosynthesis of antibiotics(dehydrogenase[ec:1.1.1.29]) ; map00680:Methane metabolism(dehydrogenase[ec:1.1.1.29])
TR36609|c2_g2_i4	14.8492	152.735	3.36257	0.00398949	0.432381	No	lipid transfer protein 2	Salvia miltiorrhiza	NA	lipid transport[GO:0006869]	lipid binding[GO:0008289]	NA	NA
TR34371|c2_g1_i1	816.708	8389.11	3.36063	0.0168681	0.669445	No	PREDICTED: uncharacterized protein LOC105165426	Sesamum indicum	NA	NA	NA	NA	NA
TR35457|c0_g2_i3	42.4264	435.578	3.3599	0.00223127	0.343264	No	PREDICTED: uncharacterized protein LOC105954446	Erythranthe guttatus	NA	NA	NA	NA	NA
TR37265|c0_g1_i1	120.915	1238.85	3.35693	0.00175432	0.311951	No	PREDICTED: PI-PLC X-box domain-containing protein DDB_G0293730	Sesamum indicum	NA	NA	NA	NA	NA
TR28778|c0_g1_i1	44.5477	456.32	3.35662	0.0021892	0.34062	No	NA	NA	NA	NA	NA	NA	NA
TR43412|c0_g1_i1	112.43	1150.23	3.35482	0.00173078	0.309102	No	PREDICTED: phosphomethylpyrimidine synthase, chloroplastic isoform X1	Sesamum indicum	NA	NA	NA	NA	NA
TR33439|c0_g5_i14	2573.16	26234.6	3.34986	0.0976888	0.955624	No	PREDICTED: chlorophyll a-b binding protein 21, chloroplastic-like	Sesamum indicum	NA	NA	NA	NA	NA
TR29041|c0_g2_i1	59.397	603.398	3.34465	0.00194035	0.321379	No	hypothetical protein MIMGU_mgv1a015166mg	Mimulus guttatus	NA	translation[GO:0006412]	structural constituent of ribosome[GO:0003735] ; RNA binding[GO:0003723]	ribosome[GO:0005840]	NA
TR2510|c0_g2_i4	40.3051	409.179	3.3437	0.00240754	0.354452	No	PREDICTED: NAC transcription factor 29	Sesamum indicum	NA	NA	NA	NA	NA
TR32393|c0_g1_i3	78.4889	795.731	3.34172	0.00178964	0.312813	No	NA	NA	NA	NA	NA	NA	NA
TR38481|c0_g1_i6	29.6985	299.813	3.3356	0.00297938	0.37772	No	PREDICTED: peptidyl-prolyl cis-trans isomerase FKBP62	Sesamum indicum	NA	NA	NA	NA	NA
TR40516|c0_g1_i2	935.502	9439.4	3.33488	0.021263	0.71473	No	PREDICTED: stachyose synthase	Sesamum indicum	NA	NA	NA	NA	NA
TR38703|c0_g2_i3	74.2462	748.59	3.33379	0.00185219	0.317003	No	NA	NA	NA	NA	NA	NA	NA
TR2340|c0_g1_i8	76.3675	769.332	3.33258	0.00184636	0.317326	No	NA	NA	NA	NA	NA	NA	NA
TR42502|c1_g5_i2	53.033	531.744	3.32577	0.00216986	0.338894	No	PREDICTED: linoleate 13S-lipoxygenase 2-1, chloroplastic-like	Sesamum indicum	NA	NA	NA	NA	NA
TR33904|c0_g3_i3	16.9706	169.706	3.32193	0.00421606	0.442913	No	NA	NA	NA	NA	NA	NA	NA
TR37483|c1_g2_i2	38.1838	380.895	3.31836	0.00266433	0.357648	No	PREDICTED: transcription factor bHLH104	Sesamum indicum	NA	NA	NA	NA	NA
TR34142|c0_g1_i1	91.2168	906.982	3.3137	0.00189814	0.318237	No	PREDICTED: major allergen Pru ar 1-like	Sesamum indicum	NA	NA	NA	NA	NA
TR21385|c0_g1_i1	42.4264	420.493	3.30905	0.00258237	0.358356	No	PREDICTED: chlorophyll a-b binding protein CP24 10A, chloroplastic	Sesamum indicum	NA	NA	NA	NA	NA
TR37039|c0_g5_i3	14.8492	147.078	3.30812	0.00451852	0.442966	No	PREDICTED: serine/arginine-rich splicing factor RS40 isoform X2	Sesamum indicum	NA	NA	NA	NA	NA
TR43164|c5_g2_i1	16.9706	167.82	3.30581	0.00438322	0.444556	No	NA	NA	NA	NA	NA	NA	NA
TR36528|c0_g1_i1	127.279	1252.05	3.29822	0.00206157	0.332082	No	cytochrome P450 CYP92A73	Salvia miltiorrhiza	NA	oxidation-reduction process[GO:0055114]	heme binding[GO:0020037] ; oxidoreductase activity, acting on paired donors, with incorporation or reduction of molecular oxygen[GO:0016705] ; monooxygenase activity[GO:0004497] ; iron ion binding[GO:0005506]	NA	NA
TR33100|c0_g1_i3	188.798	1853.56	3.29539	0.00259043	0.358264	No	PREDICTED: aluminum-activated malate transporter 4-like	Sesamum indicum	NA	NA	NA	NA	NA
TR33100|c0_g1_i5	193.04	1889.39	3.29095	0.00266262	0.358589	No	PREDICTED: aluminum-activated malate transporter 4-like	Sesamum indicum	NA	NA	NA	NA	NA
TR36609|c2_g2_i3	14.8492	145.193	3.28951	0.00471142	0.452164	No	lipid transfer protein 2	Salvia miltiorrhiza	NA	lipid transport[GO:0006869]	lipid binding[GO:0008289]	NA	NA
TR16704|c1_g1_i1	25.4558	247.016	3.27854	0.00393293	0.431949	No	NA	NA	NA	NA	NA	NA	NA
TR36299|c0_g10_i1	33.9411	328.098	3.27302	0.00323401	0.393018	No	unnamed protein product	Coffea canephora	NA	small GTPase mediated signal transduction[GO:0007264]	GTP binding[GO:0005525]	intracellular[GO:0005622]	NA
TR35227|c1_g4_i3	653.367	6307.39	3.27108	0.0126336	0.610517	No	PREDICTED: dehydration-responsive protein RD22	Sesamum indicum	NA	NA	NA	NA	NA
TR38005|c0_g1_i3	390.323	3767.46	3.27085	0.00606759	0.486782	No	PREDICTED: BTB/POZ domain-containing protein At2g30600	Sesamum indicum	NA	NA	NA	NA	NA
TR28893|c1_g2_i2	12.7279	122.565	3.26748	0.00484109	0.451938	No	PREDICTED: NADH dehydrogenase [ubiquinone] 1 beta subcomplex subunit 2	Pyrus x bretschneideri	NA	NA	NA	NA	NA
TR3908|c0_g2_i1	256.68	2462.62	3.26215	0.00372425	0.428508	No	PREDICTED: protein UXT homolog isoform X2	Sesamum indicum	NA	NA	NA	NA	NA
TR39633|c3_g11_i2	50.9117	488.375	3.26192	0.00267042	0.357297	No	NA	NA	NA	NA	NA	NA	NA
TR19514|c0_g1_i2	19.0919	182.905	3.26006	0.00469687	0.451824	No	PREDICTED: calcium-binding protein KIC-like	Sesamum indicum	NA	NA	NA	NA	NA
TR3607|c0_g4_i1	19.0919	182.905	3.26006	0.00469687	0.452884	No	PREDICTED: UDP-glucuronic acid decarboxylase 5-like	Erythranthe guttatus	NA	NA	NA	NA	NA
TR7858|c0_g3_i6	188.798	1806.42	3.25822	0.00279739	0.36711	No	PREDICTED: LOW QUALITY PROTEIN: transcription factor UNE10-like	Sesamum indicum	NA	NA	NA	NA	NA
TR7851|c0_g4_i1	190.919	1817.74	3.25111	0.00286375	0.367598	No	PREDICTED: 29 kDa ribonucleoprotein A, chloroplastic-like	Nelumbo nucifera	NA	NA	NA	NA	NA
TR36187|c0_g4_i3	80.6102	765.561	3.24748	0.00231428	0.34949	No	PREDICTED: 20 kDa chaperonin, chloroplastic-like	Sesamum indicum	NA	NA	NA	NA	NA
TR32694|c2_g1_i1	239.709	2275.94	3.24711	0.00355819	0.421199	No	hypothetical protein MIMGU_mgv1a013112mg	Mimulus guttatus	NA	photosynthesis[GO:0015979]	NA	integral component of membrane[GO:0016021] ; photosystem I reaction center[GO:0009538]	NA
TR2228|c0_g2_i2	78.4889	742.934	3.24267	0.00235928	0.351123	No	PREDICTED: uncharacterized protein LOC105160245	Sesamum indicum	NA	NA	NA	NA	NA
TR41722|c0_g3_i6	42.4264	399.751	3.23607	0.00317505	0.390475	No	PREDICTED: carbamoyl-phosphate synthase small chain, chloroplastic	Sesamum indicum	NA	NA	NA	NA	NA
TR29306|c1_g1_i1	23.3345	218.732	3.22862	0.00472803	0.451648	No	O-methyltransferase	Mentha x piperita	NA	NA	methyltransferase activity[GO:0008168]	NA	NA
TR43780|c0_g5_i5	80.6102	752.362	3.22239	0.00248116	0.353876	No	NA	NA	NA	NA	NA	NA	NA
TR29776|c1_g7_i2	284.257	2651.18	3.22137	0.00446622	0.442059	No	PREDICTED: mechanosensitive ion channel protein 10-like	Sesamum indicum	NA	NA	NA	NA	NA
TR30741|c0_g8_i2	420.021	3916.43	3.221	0.00714265	0.506721	No	chlorophyll a/b-binding protein	Tagetes erecta	NA	photosynthesis, light harvesting[GO:0009765] ; protein-chromophore linkage[GO:0018298]	metal ion binding[GO:0046872] ; chlorophyll binding[GO:0016168]	photosystem II[GO:0009523] ; integral component of membrane[GO:0016021] ; chloroplast[GO:0009507] ; photosystem I[GO:0009522]	NA
TR20436|c0_g1_i1	14.8492	137.65	3.21254	0.00557547	0.474157	No	AF448811_1unknown	Davidia involucrata	NA	NA	NA	integral component of membrane[GO:0016021]	NA
TR33640|c0_g1_i1	14.8492	137.65	3.21254	0.00557547	0.475141	No	NA	NA	NA	NA	NA	NA	NA
TR43928|c0_g3_i11	21.2132	196.104	3.20859	0.00514453	0.457395	No	PREDICTED: acetyl-coenzyme A carboxylase carboxyl transferase subunit alpha, chloroplastic-like	Sesamum indicum	NA	NA	NA	NA	NA
TR8004|c0_g2_i1	21.2132	196.104	3.20859	0.00514453	0.456408	No	NA	NA	NA	NA	NA	NA	NA
TR12669|c0_g1_i1	31.8198	294.156	3.20859	0.00406276	0.436864	No	PREDICTED: pleiotropic drug resistance protein 2-like isoform X3	Eucalyptus grandis	NA	NA	NA	NA	NA
TR41451|c2_g1_i2	186.676	1723.45	3.20669	0.00309225	0.384901	No	PREDICTED: uncharacterized protein LOC104239662	Nicotiana sylvestris	NA	NA	NA	NA	NA
TR38338|c0_g3_i1	50.9117	469.519	3.20511	0.00314337	0.387739	No	hypothetical protein MIMGU_mgv1a009538mg	Mimulus guttatus	NA	NA	NA	NA	NA
TR43015|c0_g1_i2	118.794	1095.54	3.20511	0.00256259	0.358031	No	NA	NA	NA	NA	NA	NA	NA
TR35137|c0_g1_i2	159.099	1467.01	3.20488	0.00282102	0.364391	No	PREDICTED: WAT1-related protein At4g19185-like	Sesamum indicum	NA	NA	NA	NA	NA
TR29817|c0_g2_i1	129.401	1191.71	3.20312	0.00262141	0.35773	No	NA	NA	NA	NA	NA	NA	NA
TR23928|c0_g1_i2	29.6985	273.415	3.20263	0.00434514	0.443983	No	PREDICTED: 29 kDa ribonucleoprotein A, chloroplastic	Sesamum indicum	NA	NA	NA	NA	NA
TR43724|c0_g4_i1	29.6985	273.415	3.20263	0.00434514	0.44509	No	PREDICTED: 2-oxoglutarate dehydrogenase, mitochondrial-like	Sesamum indicum	NA	NA	NA	NA	NA
TR35739|c0_g1_i6	44.5477	409.179	3.19931	0.00343098	0.408495	No	PREDICTED: putative glucose-6-phosphate 1-epimerase	Sesamum indicum	NA	NA	NA	NA	NA
TR35025|c0_g4_i2	144.25	1323.7	3.19794	0.00274705	0.362822	No	hypothetical protein MIMGU_mgv1a010790mg	Mimulus guttatus	NA	NA	organic cyclic compound binding[GO:0097159] ; heterocyclic compound binding[GO:1901363]	NA	NA
TR2383|c0_g3_i1	135.765	1244.51	3.1964	0.00270114	0.359068	No	photosystem I reaction center subunit XI, partial (chloroplast)	Camellia sinensis	NA	photosynthesis[GO:0015979]	NA	integral component of membrane[GO:0016021] ; photosystem I reaction center[GO:0009538] ; chloroplast[GO:0009507]	NA
TR38496|c1_g1_i4	21.2132	194.219	3.19465	0.00531924	0.463892	No	hypothetical protein MIMGU_mgv1a006158mg	Mimulus guttatus	NA	NA	NA	NA	NA
TR43357|c0_g1_i1	750.947	6871.19	3.19378	0.0166823	0.665285	No	PREDICTED: alpha-mannosidase-like	Sesamum indicum	NA	NA	NA	NA	NA
TR39026|c0_g1_i2	269.408	2464.5	3.19343	0.00442317	0.445309	No	hypothetical protein MIMGU_mgv1a011436mg	Mimulus guttatus	NA	NA	NA	NA	NA
TR33250|c0_g3_i2	78.4889	710.878	3.17904	0.0028164	0.364941	No	PREDICTED: NADPH-dependent 1-acyldihydroxyacetone phosphate reductase-like	Sesamum indicum	NA	NA	NA	NA	NA
TR42054|c3_g1_i1	12.7279	115.023	3.17585	0.00571069	0.475806	No	PREDICTED: thioredoxin F1, chloroplastic-like	Sesamum indicum	NA	NA	NA	NA	NA
TR2313|c0_g1_i2	42.4264	382.78	3.17348	0.0037789	0.425266	No	hypothetical protein MIMGU_mgv1a019378mg	Mimulus guttatus	NA	NA	NA	NA	NA
TR35643|c1_g4_i4	14.8492	133.879	3.17247	0.00606842	0.484954	No	PREDICTED: protein Iojap, chloroplastic	Sesamum indicum	NA	NA	NA	NA	NA
TR36108|c0_g1_i10	14.8492	133.879	3.17247	0.00606842	0.485899	No	hypothetical protein MIMGU_mgv1a013916mg	Mimulus guttatus	NA	translation[GO:0006412]	structural constituent of ribosome[GO:0003735] ; RNA binding[GO:0003723]	ribosome[GO:0005840]	NA
TR38038|c0_g6_i4	33.9411	305.47	3.16993	0.00432707	0.444347	No	PREDICTED: uncharacterized protein LOC105163785	Sesamum indicum	NA	NA	NA	NA	NA
TR36111|c1_g14_i4	59.397	533.63	3.16738	0.00323482	0.391957	No	PREDICTED: uncharacterized protein LOC105968875	Erythranthe guttatus	NA	NA	NA	NA	NA
TR24798|c0_g2_i1	271.529	2438.1	3.16658	0.00467496	0.452897	No	NA	NA	NA	NA	NA	NA	NA
TR32506|c0_g3_i1	21.2132	190.447	3.16636	0.00569235	0.475242	No	NA	NA	NA	NA	NA	NA	NA
TR30731|c0_g5_i1	42.4264	380.895	3.16636	0.00385383	0.430163	No	PREDICTED: protein NIM1-INTERACTING 2	Sesamum indicum	NA	NA	NA	NA	NA
TR37841|c0_g6_i2	44.5477	399.751	3.16568	0.00376862	0.425274	No	NA	NA	NA	NA	NA	NA	NA
TR41962|c1_g4_i3	23.3345	209.304	3.16506	0.00554846	0.473823	No	PREDICTED: 1,4-alpha-glucan-branching enzyme-like	Erythranthe guttatus	NA	NA	NA	NA	NA
TR8181|c5_g3_i2	23.3345	209.304	3.16506	0.00554846	0.47481	No	NA	NA	NA	NA	NA	NA	NA
TR35239|c0_g1_i1	150.614	1346.33	3.16011	0.00305643	0.382762	No	hypothetical protein MIMGU_mgv1a009493mg	Mimulus guttatus	NA	menaquinone biosynthetic process[GO:0009234]	1,4-dihydroxy-2-naphthoyl-CoA synthase activity[GO:0008935]	NA	map00130:Ubiquinone and other terpenoid-quinone biosynthesis(synthase[ec:4.1.3.36])
TR37921|c0_g1_i6	55.1543	492.146	3.15754	0.00345208	0.40982	No	PREDICTED: fructose-1,6-bisphosphatase, chloroplastic-like	Sesamum indicum	NA	NA	NA	NA	NA
TR38673|c1_g4_i1	12.7279	113.137	3.152	0.0059482	0.480016	No	NA	NA	NA	NA	NA	NA	NA
TR43249|c1_g8_i1	12.7279	113.137	3.152	0.0059482	0.480961	No	cellulose synthase 1B	Salix miyabeana	NA	cellulose biosynthetic process[GO:0030244]	cellulose synthase (UDP-forming) activity[GO:0016760]	integral component of membrane[GO:0016021]	map00500:Starch and sucrose metabolism(synthase (UDP-forming)[ec:2.4.1.12])
TR30997|c0_g5_i1	21.2132	188.562	3.152	0.0058915	0.481112	No	PREDICTED: probable WRKY transcription factor 40	Sesamum indicum	NA	NA	NA	NA	NA
TR44215|c1_g7_i3	31.8198	282.843	3.152	0.00476133	0.452723	No	PREDICTED: probable galactinol--sucrose galactosyltransferase 2	Sesamum indicum	NA	NA	NA	NA	NA
TR3010|c0_g1_i3	65.7609	584.542	3.152	0.00322646	0.393265	No	PREDICTED: glycine-rich protein 2-like	Sesamum indicum	NA	NA	NA	NA	NA
TR37991|c0_g1_i5	97.5807	865.499	3.14886	0.00294797	0.374894	No	malate dehydrogenase	Perilla frutescens	Lamiaceae	carbohydrate metabolic process[GO:0005975] ; malate metabolic process[GO:0006108] ; tricarboxylic acid cycle[GO:0006099]	L-malate dehydrogenase activity[GO:0030060]	NA	map00630:Glyoxylate and dicarboxylate metabolism(dehydrogenase[ec:1.1.1.37]) ; map01130:Biosynthesis of antibiotics(dehydrogenase[ec:1.1.1.37]) ; map00720:Carbon fixation pathways in prokaryotes(dehydrogenase[ec:1.1.1.37]) ; map00020:Citrate cycle (TCA cycle)(dehydrogenase[ec:1.1.1.37]) ; map00620:Pyruvate metabolism(dehydrogenase[ec:1.1.1.37]) ; map00270:Cysteine and methionine metabolism(dehydr…
TR38713|c1_g2_i1	50.9117	450.663	3.14598	0.00371756	0.42894	No	PREDICTED: 28 kDa ribonucleoprotein, chloroplastic-like	Sesamum indicum	NA	NA	NA	NA	NA
TR36784|c0_g1_i5	112.43	993.721	3.14381	0.00298329	0.377052	No	PREDICTED: uncharacterized protein LOC105172991 isoform X2	Sesamum indicum	NA	NA	NA	NA	NA
TR42780|c0_g13_i4	44.5477	392.209	3.1382	0.00406656	0.436131	No	PREDICTED: pyruvate dehydrogenase E1 component subunit alpha-3, chloroplastic	Sesamum indicum	NA	NA	NA	NA	NA
TR3146|c1_g1_i1	33.9411	297.928	3.13386	0.00478669	0.451996	No	PREDICTED: uncharacterized protein LOC105169660	Sesamum indicum	NA	NA	NA	NA	NA
TR36752|c0_g1_i6	31.8198	279.071	3.13264	0.0050246	0.455608	No	NA	NA	NA	NA	NA	NA	NA
TR43590|c1_g7_i1	72.1249	631.682	3.13063	0.00330657	0.398302	No	NA	NA	NA	NA	NA	NA	NA
TR29587|c0_g2_i1	40.3051	350.725	3.12131	0.00446353	0.443932	No	hypothetical protein MIMGU_mgv1a012981mg	Mimulus guttatus	NA	NA	NA	NA	NA
TR36115|c0_g7_i5	19.0919	165.934	3.11958	0.00657923	0.498613	No	PREDICTED: heterogeneous nuclear ribonucleoprotein A1-like 2	Sesamum indicum	NA	NA	NA	NA	NA
TR43406|c1_g1_i3	296.985	2575.75	3.11653	0.00559624	0.473961	No	PREDICTED: AMP deaminase-like isoform X1	Sesamum indicum	NA	NA	NA	NA	NA
TR32106|c0_g1_i2	42.4264	367.696	3.11548	0.00442896	0.443717	No	PREDICTED: 14 kDa zinc-binding protein	Sesamum indicum	NA	NA	NA	NA	NA
TR34265|c3_g2_i1	277.893	2404.16	3.11293	0.00526286	0.463899	No	PREDICTED: uncharacterized protein LOC105160233	Sesamum indicum	NA	NA	NA	NA	NA
TR40758|c0_g2_i2	23.3345	201.761	3.11211	0.00631371	0.49211	No	hypothetical protein MIMGU_mgv1a018561mg, partial	Mimulus guttatus	NA	NA	nucleic acid binding[GO:0003676] ; nucleotide binding[GO:0000166]	NA	NA
TR41403|c2_g5_i1	14.8492	128.222	3.11018	0.00689323	0.506523	No	NA	NA	NA	NA	NA	NA	NA
TR27424|c1_g1_i5	205.768	1768.71	3.10361	0.00411573	0.437973	No	NA	NA	NA	NA	NA	NA	NA
TR38668|c0_g1_i2	19.0919	164.049	3.10309	0.00683985	0.505312	No	hypothetical protein JCGZ_08750	Jatropha curcas	NA	protein ubiquitination[GO:0016567]	ligase activity[GO:0016874] ; ubiquitin-protein transferase activity[GO:0004842]	NA	NA
TR33100|c0_g1_i7	101.823	873.041	3.09998	0.00334911	0.402245	No	PREDICTED: aluminum-activated malate transporter 4-like	Sesamum indicum	NA	NA	NA	NA	NA
TR36328|c1_g4_i1	14.8492	126.336	3.08881	0.00719266	0.508512	No	PREDICTED: protein disulfide isomerase-like 2-3	Sesamum indicum	NA	NA	NA	NA	NA
TR44630|c0_g1_i2	14.8492	126.336	3.08881	0.00719266	0.507639	No	PREDICTED: pleiotropic drug resistance protein 2-like	Sesamum indicum	NA	NA	NA	NA	NA
TR29125|c1_g1_i7	201.525	1704.6	3.0804	0.00426114	0.441996	No	NA	NA	NA	NA	NA	NA	NA
TR36609|c2_g2_i1	86.9741	733.505	3.07615	0.00365008	0.42594	No	PREDICTED: non-specific lipid-transfer protein 2-like	Sesamum indicum	NA	lipid transport[GO:0006869]	lipid binding[GO:0008289]	NA	NA
TR33469|c1_g5_i1	29.6985	248.902	3.06711	0.00629219	0.494184	No	PREDICTED: glutathione S-transferase DHAR3, chloroplastic	Sesamum indicum	NA	NA	NA	NA	NA
TR34379|c0_g4_i7	44.5477	373.352	3.06711	0.00493826	0.450765	No	PREDICTED: proline-rich protein 4	Sesamum indicum	NA	NA	NA	NA	NA
TR3908|c0_g2_i3	271.529	2274.06	3.06609	0.005597	0.47305	No	hypothetical protein MIMGU_mgv1a015739mg	Mimulus guttatus	NA	NA	NA	NA	NA
TR25659|c0_g5_i1	76.3675	639.225	3.06529	0.00389153	0.432023	No	hypothetical protein M569_00899, partial	Genlisea aurea	NA	NA	ATP binding[GO:0005524]	NA	NA
TR36738|c0_g2_i5	99.7021	829.672	3.05685	0.00376361	0.425878	No	hypothetical protein MIMGU_mgv1a011760mg	Mimulus guttatus	NA	NA	NA	NA	NA
TR40814|c0_g3_i1	59.397	494.032	3.05614	0.00443032	0.442773	No	PREDICTED: two-component response regulator-like APRR9	Sesamum indicum	NA	NA	NA	NA	NA
TR41596|c0_g1_i1	72.1249	599.627	3.0555	0.004079	0.436326	No	NA	NA	NA	NA	NA	NA	NA
TR39520|c1_g5_i2	205.768	1710.26	3.05512	0.00455769	0.445742	No	hypothetical protein, partial	Zea mays	NA	proteolysis[GO:0006508]	aspartic-type endopeptidase activity[GO:0004190]	NA	NA
TR37678|c2_g3_i4	36.0624	297.928	3.04639	0.00585617	0.481096	No	NA	NA	NA	NA	NA	NA	NA
TR3918|c0_g1_i7	33.9411	279.071	3.03953	0.00621167	0.49162	No	NA	NA	NA	NA	NA	NA	NA
TR28962|c0_g1_i4	212.132	1744.2	3.03953	0.00480606	0.449689	No	PREDICTED: photosystem II repair protein PSB27-H1, chloroplastic	Vigna radiata var. radiata	NA	NA	NA	NA	NA
TR32762|c0_g4_i1	116.673	957.894	3.0374	0.00393816	0.43137	No	hypothetical protein B456_009G262000	Gossypium raimondii	NA	photosynthesis, light harvesting[GO:0009765] ; protein-chromophore linkage[GO:0018298]	chlorophyll binding[GO:0016168]	photosystem II[GO:0009523] ; integral component of membrane[GO:0016021] ; chloroplast[GO:0009507]	NA
TR37143|c0_g2_i1	10.6066	86.7384	3.03171	0.00581038	0.479251	No	NA	NA	NA	NA	NA	NA	NA
TR15970|c0_g1_i1	12.7279	103.709	3.02647	0.00727532	0.510839	No	PREDICTED: patellin-3-like	Sesamum indicum	NA	NA	NA	NA	NA
TR35950|c0_g11_i1	25.4558	207.418	3.02647	0.00755031	0.522996	No	PREDICTED: glutathione S-transferase T1-like	Sesamum indicum	NA	NA	NA	NA	NA
TR37708|c0_g4_i8	29.6985	241.359	3.02272	0.00707664	0.506411	No	hypothetical protein MIMGU_mgv1a027009mg	Mimulus guttatus	NA	NA	NA	NA	NA
TR37452|c0_g7_i2	21.2132	171.591	3.01594	0.00814224	0.535121	No	HPPR_SOLSCRecName: Full=Hydroxyphenylpyruvate reductase; Short=HPPR	Plectranthus scutellarioides	Lamiaceae	oxidation-reduction process[GO:0055114]	NAD binding[GO:0051287] ; hydroxyphenylpyruvate reductase activity[GO:0047995]	NA	map00130:Ubiquinone and other terpenoid-quinone biosynthesis(reductase[ec:1.1.1.237]) ; map00350:Tyrosine metabolism(reductase[ec:1.1.1.237]) ; map00360:Phenylalanine metabolism(reductase[ec:1.1.1.237]) ; map00960:Tropane, piperidine and pyridine alkaloid biosynthesis(reductase[ec:1.1.1.237])
TR36115|c0_g2_i1	165.463	1336.9	3.01431	0.00446714	0.441087	No	NA	NA	NA	NA	NA	NA	NA
TR35332|c0_g8_i2	25.4558	205.532	3.0133	0.00779542	0.528391	No	hypothetical protein MIMGU_mgv1a014477mg	Mimulus guttatus	NA	NA	NA	integral component of membrane[GO:0016021]	NA
TR42231|c0_g5_i2	57.2756	461.976	3.01183	0.00510032	0.455437	No	PREDICTED: cell division protein FtsZ homolog 1, chloroplastic isoform X1	Sesamum indicum	NA	NA	NA	NA	NA
TR26416|c1_g1_i3	700.036	5630.46	3.00775	0.017989	0.677285	No	PREDICTED: light-regulated protein-like	Sesamum indicum	NA	NA	NA	NA	NA
TR2209|c0_g3_i3	23.3345	186.676	3	0.00822857	0.536503	No	PREDICTED: iron-sulfur assembly protein IscA, chloroplastic	Sesamum indicum	NA	NA	NA	NA	NA
TR2675|c0_g2_i6	27.5772	220.617	3	0.00780157	0.526203	No	PREDICTED: 50S ribosomal protein L17, chloroplastic	Sesamum indicum	NA	NA	NA	NA	NA
TR26943|c0_g1_i1	159.099	1272.79	3	0.0045588	0.444791	No	cytochrome P450	Salvia miltiorrhiza	NA	NA	metal ion binding[GO:0046872] ; oxidoreductase activity[GO:0016491]	NA	NA
TR40019|c0_g5_i1	46.669	371.467	2.9927	0.00590975	0.480691	No	hypothetical protein MIMGU_mgv1a008527mg	Mimulus guttatus	NA	tetrapyrrole biosynthetic process[GO:0033014] ; peptidyl-pyrromethane cofactor linkage[GO:0018160]	hydroxymethylbilane synthase activity[GO:0004418]	NA	map00860:Porphyrin and chlorophyll metabolism(synthase[ec:2.5.1.61])
TR41654|c0_g5_i3	125.158	995.606	2.99183	0.0044428	0.442943	No	NA	NA	NA	NA	NA	NA	NA
TR31880|c4_g4_i1	171.827	1365.19	2.99007	0.00479522	0.450729	No	hypothetical protein B456_007G095300	Gossypium raimondii	NA	peroxisome fission[GO:0016559]	NA	integral component of peroxisomal membrane[GO:0005779]	NA
TR34996|c1_g4_i4	61.5183	488.375	2.9889	0.00525519	0.46422	No	PREDICTED: cytochrome b-c1 complex subunit Rieske-4, mitochondrial-like	Sesamum indicum	NA	NA	NA	NA	NA
TR36518|c2_g3_i4	27.5772	218.732	2.98762	0.00804749	0.532301	No	NA	NA	NA	NA	NA	NA	NA
TR38338|c0_g3_i2	23.3345	184.791	2.98535	0.00851682	0.545767	No	hypothetical protein MIMGU_mgv1a009538mg	Mimulus guttatus	NA	NA	NA	NA	NA
TR40973|c1_g2_i2	42.4264	335.64	2.98388	0.00631135	0.492861	No	unnamed protein product	Coffea canephora	NA	transmembrane transport[GO:0055085]	NA	integral component of membrane[GO:0016021]	NA
TR39177|c0_g2_i2	40.3051	318.669	2.98303	0.00650361	0.499331	No	hypothetical protein MIMGU_mgv1a004329mg	Mimulus guttatus	NA	oxidation-reduction process[GO:0055114]	flavin adenine dinucleotide binding[GO:0050660] ; oxidoreductase activity, acting on CH-OH group of donors[GO:0016614]	NA	NA
TR34270|c2_g3_i1	216.375	1710.26	2.98261	0.0054873	0.472529	No	PREDICTED: uncharacterized protein LOC105177790	Sesamum indicum	NA	NA	NA	NA	NA
TR31699|c0_g1_i1	78.4889	620.368	2.98257	0.0048449	0.451268	No	PREDICTED: probable WRKY transcription factor 35	Sesamum indicum	NA	NA	NA	NA	NA
TR28081|c0_g1_i1	55.1543	435.578	2.98138	0.00564651	0.475278	No	unnamed protein product	Coffea canephora	NA	metal ion transport[GO:0030001]	metal ion binding[GO:0046872]	NA	NA
TR41962|c1_g1_i1	16.9706	133.879	2.97982	0.00916251	0.557569	No	predicted protein	Hordeum vulgare subsp. vulgare	NA	metabolic process[GO:0008152]	catalytic activity[GO:0003824]	NA	NA
TR2280|c0_g1_i1	167.584	1321.82	2.97956	0.00486847	0.452437	No	PREDICTED: photosystem II core complex proteins psbY, chloroplastic-like	Sesamum indicum	NA	NA	NA	NA	NA
TR36489|c0_g1_i2	199.404	1572.61	2.97939	0.00526547	0.463136	No	cytochrome P450 CYP81Q43	Salvia miltiorrhiza	NA	oxidation-reduction process[GO:0055114]	heme binding[GO:0020037] ; oxidoreductase activity, acting on paired donors, with incorporation or reduction of molecular oxygen[GO:0016705] ; monooxygenase activity[GO:0004497] ; iron ion binding[GO:0005506]	NA	NA
TR42436|c0_g7_i1	31.8198	250.787	2.97847	0.00763057	0.524136	No	PREDICTED: calreticulin-like	Eucalyptus grandis	NA	NA	NA	NA	NA
TR33196|c0_g1_i4	231.224	1821.51	2.97777	0.00579522	0.478963	No	hypothetical protein MIMGU_mgv1a008621mg	Mimulus guttatus	NA	methylation[GO:0032259]	methyltransferase activity[GO:0008168]	NA	NA
TR32055|c0_g1_i1	89.0955	701.45	2.97692	0.00475335	0.453013	No	PREDICTED: uncharacterized protein LOC105165185	Sesamum indicum	NA	NA	NA	NA	NA
TR34270|c2_g4_i3	25.4558	199.876	2.97303	0.00858315	0.544917	No	NA	NA	NA	NA	NA	NA	NA
TR37991|c0_g1_i3	82.7315	648.653	2.97094	0.00492236	0.450314	No	PREDICTED: malate dehydrogenase, glyoxysomal	Vitis vinifera	NA	sulfur compound biosynthetic process[GO:0044272] ; coenzyme biosynthetic process[GO:0009108] ; cellular amino acid biosynthetic process[GO:0008652] ; jasmonic acid biosynthetic process[GO:0009695] ; leaf morphogenesis[GO:0009965] ; carotenoid biosynthetic process[GO:0016117] ; photorespiration[GO:0009853] ; regulation of plant-type hypersensitive response[GO:0010363] ; positive regulation of cata…	L-malate dehydrogenase activity[GO:0030060]	peroxisome[GO:0005777] ; chloroplast envelope[GO:0009941] ; vacuole[GO:0005773] ; apoplast[GO:0048046]	map00630:Glyoxylate and dicarboxylate metabolism(dehydrogenase[ec:1.1.1.37]) ; map01130:Biosynthesis of antibiotics(dehydrogenase[ec:1.1.1.37]) ; map00720:Carbon fixation pathways in prokaryotes(dehydrogenase[ec:1.1.1.37]) ; map00020:Citrate cycle (TCA cycle)(dehydrogenase[ec:1.1.1.37]) ; map00620:Pyruvate metabolism(dehydrogenase[ec:1.1.1.37]) ; map00270:Cysteine and methionine metabolism(dehydr…
TR34853|c0_g1_i3	93.3381	731.62	2.97056	0.00478881	0.451158	No	PREDICTED: protein GPR107-like	Sesamum indicum	NA	NA	NA	NA	NA
TR32192|c3_g1_i2	80.6102	631.682	2.97016	0.00497026	0.451678	No	hypothetical protein MIMGU_mgv1a006198mg	Mimulus guttatus	NA	pectin catabolic process[GO:0045490]	metal ion binding[GO:0046872] ; pectate lyase activity[GO:0030570]	NA	map00040:Pentose and glucuronate interconversions(lyase[ec:4.2.2.2])
TR32829|c0_g2_i2	76.3675	597.741	2.96849	0.00508264	0.454846	No	malate dehydrogenase	Perilla frutescens	Lamiaceae	carbohydrate metabolic process[GO:0005975] ; malate metabolic process[GO:0006108] ; tricarboxylic acid cycle[GO:0006099]	L-malate dehydrogenase activity[GO:0030060]	NA	map00630:Glyoxylate and dicarboxylate metabolism(dehydrogenase[ec:1.1.1.37]) ; map01130:Biosynthesis of antibiotics(dehydrogenase[ec:1.1.1.37]) ; map00720:Carbon fixation pathways in prokaryotes(dehydrogenase[ec:1.1.1.37]) ; map00020:Citrate cycle (TCA cycle)(dehydrogenase[ec:1.1.1.37]) ; map00620:Pyruvate metabolism(dehydrogenase[ec:1.1.1.37]) ; map00270:Cysteine and methionine metabolism(dehydr…
TR2438|c0_g1_i1	40.3051	314.898	2.96585	0.0068134	0.505175	No	PREDICTED: chaperone protein dnaJ 11, chloroplastic-like	Sesamum indicum	NA	NA	NA	NA	NA
TR43014|c2_g1_i1	19.0919	148.964	2.96393	0.00941559	0.564606	No	putative adenosylhomocysteinase	Trifolium pratense	NA	one-carbon metabolic process[GO:0006730]	adenosylhomocysteinase activity[GO:0004013]	NA	map00270:Cysteine and methionine metabolism(S-adenosylhomocysteine synthase[ec:3.3.1.1])
TR34990|c0_g6_i7	27.5772	214.96	2.96253	0.00856501	0.545451	No	PREDICTED: protein DEHYDRATION-INDUCED 19 homolog 3-like isoform X2	Sesamum indicum	NA	NA	NA	NA	NA
TR43971|c0_g1_i3	479.418	3731.64	2.96045	0.0120161	0.600454	No	PREDICTED: CSC1-like protein ERD4	Sesamum indicum	NA	NA	NA	NA	NA
TR30404|c0_g3_i1	369.11	2860.48	2.95414	0.00917956	0.556957	No	NA	NA	NA	NA	NA	NA	NA
TR31443|c3_g5_i1	14.8492	115.023	2.95346	0.00927715	0.558751	No	NA	NA	NA	NA	NA	NA	NA
TR36995|c0_g2_i2	663.973	5140.19	2.95263	0.0178588	0.678602	No	secretory peroxidase	Avicennia marina	NA	cellular oxidant detoxification[GO:0098869] ; response to oxidative stress[GO:0006979] ; hydrogen peroxide catabolic process[GO:0042744] ; oxidation-reduction process[GO:0055114]	metal ion binding[GO:0046872] ; heme binding[GO:0020037] ; peroxidase activity[GO:0004601]	extracellular region[GO:0005576]	map00940:Phenylpropanoid biosynthesis(lactoperoxidase[ec:1.11.1.7])
TR34379|c0_g4_i3	339.411	2624.78	2.95109	0.00849349	0.546832	No	PREDICTED: proline-rich protein 4	Sesamum indicum	NA	NA	NA	NA	NA
TR33439|c0_g5_i1	150.614	1163.43	2.94945	0.005073	0.454975	No	NA	NA	NA	NA	NA	NA	NA
TR31433|c0_g1_i1	99.7021	769.332	2.94791	0.00503058	0.454145	No	hypothetical protein MIMGU_mgv11b018128mg	Mimulus guttatus	NA	NA	NA	NA	NA
TR37092|c3_g2_i2	19.0919	147.078	2.94555	0.00980922	0.573965	No	beta-tubulin, partial	Ammopiptanthus mongolicus	NA	microtubule-based process[GO:0007017]	structural constituent of cytoskeleton[GO:0005200] ; GTP binding[GO:0005525]	microtubule[GO:0005874]	NA
TR42454|c1_g1_i1	19.0919	147.078	2.94555	0.00980922	0.573149	No	PREDICTED: sulfite reductase 1 [ferredoxin], chloroplastic-like	Sesamum indicum	NA	NA	NA	NA	NA
TR23787|c1_g1_i3	131.522	1012.58	2.94466	0.00502693	0.454815	No	PREDICTED: dnaJ homolog subfamily B member 7-like isoform X1	Sesamum indicum	NA	NA	NA	NA	NA
TR34929|c0_g3_i1	23.3345	179.134	2.9405	0.00946116	0.564864	No	hypothetical protein MIMGU_mgv1a011580mg	Mimulus guttatus	NA	NA	NA	NA	NA
TR31283|c0_g6_i1	80.6102	618.483	2.9397	0.00540079	0.468023	No	NA	NA	NA	NA	NA	NA	NA
TR43187|c2_g6_i3	197.283	1512.27	2.93837	0.00573146	0.475607	No	PREDICTED: oligopeptide transporter 5-like	Sesamum indicum	NA	NA	NA	NA	NA
TR3746|c2_g1_i2	27.5772	211.189	2.93699	0.00911882	0.557388	No	PREDICTED: uncharacterized protein LOC100500629 isoform X2	Glycine max	NA	NA	NA	NA	NA
TR3816|c0_g2_i1	65.7609	503.46	2.93657	0.00589206	0.480203	No	PREDICTED: heme-binding-like protein At3g10130, chloroplastic	Sesamum indicum	NA	NA	NA	NA	NA
TR7878|c0_g7_i1	125.158	957.894	2.93612	0.00512085	0.456277	No	PREDICTED: protein EARLY RESPONSIVE TO DEHYDRATION 15	Sesamum indicum	NA	NA	NA	NA	NA
TR26100|c0_g2_i2	36.0624	275.3	2.93244	0.0079812	0.531338	No	PREDICTED: 50S ribosomal protein 6, chloroplastic	Sesamum indicum	NA	NA	NA	NA	NA
TR37217|c0_g3_i2	23.3345	177.248	2.92523	0.00980463	0.574515	No	NA	NA	NA	NA	NA	NA	NA
TR34142|c0_g12_i2	110.309	837.214	2.92405	0.00529629	0.462874	No	PREDICTED: major allergen Pru ar 1-like	Sesamum indicum	NA	NA	NA	NA	NA
TR28223|c0_g1_i2	103.945	788.188	2.92272	0.00534681	0.465309	No	hypothetical protein MIMGU_mgv1a012197mg	Mimulus guttatus	NA	metabolic process[GO:0008152] ; carbon utilization[GO:0015976]	zinc ion binding[GO:0008270] ; carbonate dehydratase activity[GO:0004089]	NA	map00910:Nitrogen metabolism(dehydratase[ec:4.2.1.1])
TR33905|c0_g1_i1	36.0624	273.415	2.92252	0.00819578	0.536921	No	hypothetical protein MIMGU_mgv1a013424mg	Mimulus guttatus	NA	NA	NA	integral component of membrane[GO:0016021]	NA
TR30741|c0_g7_i3	57.2756	433.692	2.92068	0.00654756	0.500834	No	PREDICTED: chlorophyll a-b binding protein 13, chloroplastic	Sesamum indicum	NA	NA	NA	NA	NA
TR33898|c1_g4_i1	40.3051	303.585	2.91306	0.00785593	0.526411	No	PREDICTED: clavaminate synthase-like protein At3g21360	Sesamum indicum	NA	NA	NA	NA	NA
TR2592|c0_g1_i1	76.3675	575.114	2.91282	0.00591977	0.480555	No	PREDICTED: rRNA-processing protein fcf2-like	Sesamum indicum	NA	NA	NA	NA	NA
TR36122|c0_g1_i4	27.5772	207.418	2.91099	0.00971158	0.572328	No	PREDICTED: uncharacterized protein LOC105175084	Sesamum indicum	NA	NA	NA	NA	NA
TR33397|c0_g4_i2	23.3345	175.362	2.9098	0.0101636	0.580639	No	PREDICTED: UPF0483 protein AGAP003155	Sesamum indicum	NA	NA	NA	NA	NA
TR42338|c0_g2_i8	116.673	876.812	2.9098	0.00547873	0.473778	No	putative rubisco subunit binding-protein alpha subunit	Trifolium pratense	NA	protein refolding[GO:0042026]	ATP binding[GO:0005524]	cytoplasm[GO:0005737]	NA
TR2361|c2_g1_i2	335.169	2504.1	2.90133	0.00914527	0.557346	No	terpene synthase 3	Origanum vulgare	Lamiaceae	metabolic process[GO:0008152]	magnesium ion binding[GO:0000287] ; terpene synthase activity[GO:0010333]	NA	NA
TR42666|c0_g9_i1	21.2132	158.392	2.90046	0.0106426	0.586784	No	hypothetical protein MIMGU_mgv1a002810mg	Mimulus guttatus	NA	RNA modification[GO:0009451]	4 iron, 4 sulfur cluster binding[GO:0051539] ; transferase activity[GO:0016740]	NA	NA
TR34217|c0_g2_i3	72.1249	537.401	2.89743	0.00631019	0.493709	No	NA	NA	NA	NA	NA	NA	NA
TR42225|c1_g2_i2	29.6985	220.617	2.89308	0.00985408	0.571704	No	PREDICTED: cellulose synthase-like protein G3	Sesamum indicum	NA	NA	NA	NA	NA
TR41834|c0_g2_i2	36.0624	267.758	2.89236	0.00888057	0.553533	No	PREDICTED: acetylornithine aminotransferase, chloroplastic/mitochondrial-like	Sesamum indicum	NA	NA	NA	NA	NA
TR32784|c0_g1_i1	27.5772	203.647	2.88452	0.0103461	0.582161	No	PREDICTED: uncharacterized protein LOC105168308	Sesamum indicum	NA	NA	NA	NA	NA
TR42225|c1_g1_i8	48.7904	360.153	2.88394	0.00773601	0.528726	No	NA	NA	NA	NA	NA	NA	NA
TR3552|c0_g1_i2	135.765	1001.26	2.88264	0.00589088	0.48202	No	PREDICTED: transcription factor TCP13-like	Nicotiana tomentosiformis	NA	NA	NA	NA	NA
TR35055|c0_g2_i1	11837	87279.6	2.88235	0.485706	1.10924	No	PREDICTED: thiamine thiazole synthase 2, chloroplastic-like	Sesamum indicum	NA	NA	NA	NA	NA
TR32235|c2_g1_i7	14.8492	109.366	2.8807	0.0105242	0.583391	No	putative ethylene responsive element-DREB	Capsicum annuum	NA	regulation of transcription, DNA-templated[GO:0006355] ; transcription, DNA-templated[GO:0006351]	transcription factor activity, sequence-specific DNA binding[GO:0003700] ; DNA binding[GO:0003677]	nucleus[GO:0005634]	NA
TR34803|c1_g2_i3	38.1838	280.957	2.87932	0.00888049	0.554369	No	hypothetical protein MIMGU_mgv1a015819mg	Mimulus guttatus	NA	NA	NA	NA	NA
TR36830|c1_g1_i6	403.051	2960.42	2.87677	0.0113614	0.593742	No	PREDICTED: pectinesterase 1-like	Sesamum indicum	NA	NA	NA	NA	NA
TR34746|c0_g2_i2	182.434	1338.79	2.87549	0.00639141	0.496282	No	PREDICTED: uncharacterized protein LOC105174843	Sesamum indicum	NA	NA	NA	NA	NA
TR32240|c0_g7_i1	50.9117	373.352	2.87447	0.00779655	0.527597	No	PREDICTED: leucine-rich repeat extensin-like protein 6	Erythranthe guttatus	NA	NA	NA	NA	NA
TR34142|c0_g7_i1	156.978	1146.46	2.86855	0.00622746	0.491922	No	pathogenesis-related protein 10	Salvia miltiorrhiza	NA	response to biotic stimulus[GO:0009607] ; defense response[GO:0006952]	NA	NA	NA
TR35055|c0_g2_i4	9206.53	67120.5	2.86602	0.393308	1.11618	No	PREDICTED: thiamine thiazole synthase 1, chloroplastic	Eucalyptus grandis	NA	NA	NA	NA	NA
TR3765|c0_g1_i1	21.2132	154.621	2.8657	0.0115157	0.595743	No	PREDICTED: ubiquitin-conjugating enzyme E2 5	Vitis vinifera	NA	protein ubiquitination[GO:0016567] ; ubiquitin-dependent protein catabolic process[GO:0006511]	ubiquitin protein ligase binding[GO:0031625] ; ubiquitin protein ligase activity[GO:0061630] ; ATP binding[GO:0005524]	cytoplasm[GO:0005737]	NA
TR39082|c2_g1_i1	53.033	386.552	2.8657	0.00784579	0.526591	No	hypothetical protein MIMGU_mgv1a0042812mg, partial	Mimulus guttatus	NA	NA	NA	NA	NA
TR34944|c1_g1_i7	55.1543	401.637	2.86434	0.0077447	0.527565	No	ATP synthase protein I-related protein, partial	Erythranthe guttata	NA	NA	NA	NA	NA
TR35024|c0_g8_i5	99.7021	725.963	2.8642	0.00627975	0.494152	No	SOD2	Scutellaria baicalensis	Lamiaceae	cellular response to high light intensity[GO:0071486] ; removal of superoxide radicals[GO:0019430] ; oxidation-reduction process[GO:0055114]	metal ion binding[GO:0046872] ; superoxide dismutase activity[GO:0004784]	chloroplast[GO:0009507]	NA
TR42641|c0_g12_i2	205.768	1497.18	2.86316	0.00690782	0.504886	No	pyrophosphatase, partial	Solanum pimpinellifolium	NA	metabolic process[GO:0008152] ; proton transport[GO:0015992] ; transmembrane transport[GO:0055085]	inorganic diphosphatase activity[GO:0004427] ; hydrogen-translocating pyrophosphatase activity[GO:0009678]	integral component of membrane[GO:0016021]	map00190:Oxidative phosphorylation(diphosphatase[ec:3.6.1.1])
TR42437|c0_g3_i1	23.3345	169.706	2.8625	0.0113411	0.593438	No	hypothetical protein MIMGU_mgv1a006463mg	Mimulus guttatus	NA	methylation[GO:0032259]	methyltransferase activity[GO:0008168]	integral component of membrane[GO:0016021]	NA
TR36232|c0_g7_i3	36.0624	262.101	2.86155	0.00963196	0.570912	No	PREDICTED: uncharacterized protein LOC105173891	Sesamum indicum	NA	NA	NA	NA	NA
TR2537|c1_g1_i1	76.3675	554.372	2.85982	0.00683756	0.506053	No	hypothetical protein MIMGU_mgv1a011959mg	Mimulus guttatus	NA	NA	NA	NA	NA
TR33118|c0_g1_i6	67.8823	492.146	2.85798	0.00720253	0.507464	No	putative expansin	Capsicum annuum	NA	plant-type cell wall organization[GO:0009664]	NA	extracellular region[GO:0005576] ; cell wall[GO:0005618] ; membrane[GO:0016020]	NA
TR38508|c0_g1_i5	84.8528	614.711	2.85688	0.00665154	0.5004	No	PREDICTED: potassium channel SKOR-like	Sesamum indicum	NA	NA	NA	NA	NA
TR39997|c3_g4_i2	82.7315	597.741	2.85301	0.00677384	0.503151	No	NA	NA	NA	NA	NA	NA	NA
TR3629|c2_g2_i1	16.9706	122.565	2.85244	0.0118395	0.598177	No	PREDICTED: 15 kDa selenoprotein	Sesamum indicum	NA	NA	NA	NA	NA
TR40791|c0_g3_i7	19.0919	137.65	2.84997	0.0120732	0.601112	No	PREDICTED: beta-D-glucosyl crocetin beta-1,6-glucosyltransferase-like	Sesamum indicum	NA	NA	NA	NA	NA
TR41663|c2_g7_i3	229.103	1651.8	2.84997	0.00751566	0.521475	No	PREDICTED: ruBisCO large subunit-binding protein subunit beta, chloroplastic	Sesamum indicum	NA	NA	NA	NA	NA
TR41258|c0_g4_i2	48.7904	350.725	2.84567	0.00854553	0.545904	No	PREDICTED: serine/threonine-protein kinase At5g01020	Sesamum indicum	NA	NA	NA	NA	NA
TR32500|c1_g5_i5	103.945	746.705	2.84472	0.00656469	0.50121	No	PREDICTED: UDP-glycosyltransferase 74F2-like	Erythranthe guttatus	NA	NA	NA	NA	NA
TR38942|c1_g1_i6	110.309	791.96	2.84388	0.00652782	0.500255	No	cytochrome P450 CYP714G13	Salvia miltiorrhiza	NA	oxidation-reduction process[GO:0055114]	heme binding[GO:0020037] ; oxidoreductase activity, acting on paired donors, with incorporation or reduction of molecular oxygen[GO:0016705] ; monooxygenase activity[GO:0004497] ; iron ion binding[GO:0005506]	integral component of membrane[GO:0016021]	NA
TR34629|c0_g1_i6	33.9411	243.245	2.8413	0.010508	0.583276	No	PREDICTED: acyl-[acyl-carrier-protein] desaturase, chloroplastic-like	Populus euphratica	NA	NA	NA	NA	NA
TR3099|c0_g5_i5	86.9741	622.254	2.83885	0.00693088	0.504774	No	PREDICTED: protein GAST1-like	Sesamum indicum	NA	NA	NA	NA	NA
TR3818|c0_g1_i4	57.2756	409.179	2.83674	0.00820142	0.536435	No	NA	NA	NA	NA	NA	NA	NA
TR40215|c0_g3_i1	16.9706	120.68	2.83007	0.0123591	0.609437	No	PREDICTED: uncharacterized protein LOC105179131	Sesamum indicum	NA	NA	NA	NA	NA
TR7708|c3_g2_i3	16.9706	120.68	2.83007	0.0123591	0.608706	No	NA	NA	NA	NA	NA	NA	NA
TR25272|c0_g3_i1	19.0919	135.765	2.83007	0.0125918	0.611371	No	NA	NA	NA	NA	NA	NA	NA
TR37303|c0_g1_i3	50.9117	362.039	2.83007	0.00875567	0.54992	No	PREDICTED: bifunctional nitrilase/nitrile hydratase NIT4A	Sesamum indicum	NA	NA	NA	NA	NA
TR44604|c3_g3_i2	322.441	2279.71	2.82175	0.0101796	0.579939	No	PREDICTED: subtilisin-like protease	Sesamum indicum	NA	NA	NA	NA	NA
TR2920|c0_g1_i1	80.6102	569.457	2.82055	0.00745608	0.518217	No	NA	NA	NA	NA	NA	NA	NA
TR40715|c0_g1_i1	72.1249	509.117	2.81943	0.00779674	0.526742	No	PREDICTED: LOW QUALITY PROTEIN: DELLA protein GAI	Sesamum indicum	NA	NA	NA	NA	NA
TR38508|c0_g2_i1	103.945	733.505	2.81899	0.00702264	0.508751	No	PREDICTED: potassium channel SKOR-like	Erythranthe guttatus	NA	NA	NA	NA	NA
TR38083|c0_g5_i2	345.775	2438.1	2.81785	0.0108851	0.590645	No	PREDICTED: protochlorophyllide reductase	Sesamum indicum	NA	NA	NA	NA	NA
TR4056|c0_g2_i1	670.337	4721.59	2.81631	0.0212349	0.714954	No	PREDICTED: hypersensitive-induced response protein 1	Sesamum indicum	NA	NA	NA	NA	NA
TR33220|c0_g2_i1	27.5772	194.219	2.81614	0.012136	0.602052	No	PREDICTED: 28 kDa ribonucleoprotein, chloroplastic-like	Sesamum indicum	NA	NA	NA	NA	NA
TR26278|c0_g2_i1	25.4558	179.134	2.81497	0.0123797	0.608263	No	PREDICTED: calcium-transporting ATPase 4, plasma membrane-type-like	Sesamum indicum	NA	NA	NA	NA	NA
TR33229|c0_g5_i4	21.2132	148.964	2.81193	0.0129849	0.618039	No	PREDICTED: probable strigolactone esterase D14 homolog	Sesamum indicum	NA	NA	NA	NA	NA
TR40546|c0_g1_i6	40.3051	282.843	2.81097	0.0103076	0.582389	No	PREDICTED: MATE efflux family protein 2, chloroplastic	Sesamum indicum	NA	NA	NA	NA	NA
TR30703|c0_g4_i3	218.496	1533.01	2.81069	0.00797503	0.532654	No	PREDICTED: ATP synthase delta chain, chloroplastic-like	Sesamum indicum	NA	NA	NA	NA	NA
TR32114|c0_g1_i3	19.0919	133.879	2.8099	0.0131348	0.619431	No	hypothetical protein MIMGU_mgv1a006903mg	Mimulus guttatus	NA	carbohydrate metabolic process[GO:0005975]	racemase and epimerase activity, acting on carbohydrates and derivatives[GO:0016857]	integral component of membrane[GO:0016021]	NA
TR34870|c0_g1_i1	135.765	950.352	2.80735	0.0071142	0.506452	No	PREDICTED: extra-large guanine nucleotide-binding protein 1	Sesamum indicum	NA	NA	NA	NA	NA
TR2793|c0_g7_i4	286.378	2000.64	2.80447	0.00954985	0.567684	No	glycine-rich RNA-binding protein 1-3	Capsicum annuum	NA	NA	nucleic acid binding[GO:0003676] ; nucleotide binding[GO:0000166]	NA	NA
TR39035|c0_g1_i3	294.864	2059.09	2.80389	0.00977705	0.573717	No	endopeptidase 1	Plantago major	NA	proteolysis[GO:0006508]	peptidase activity[GO:0008233]	NA	NA
TR3741|c3_g1_i3	305.47	2130.75	2.80226	0.0100876	0.579522	No	PREDICTED: ethylene-responsive transcription factor RAP2-4	Sesamum indicum	NA	NA	NA	NA	NA
TR31656|c0_g4_i4	358.503	2498.44	2.80097	0.0115715	0.595627	No	PREDICTED: metal transporter Nramp3	Sesamum indicum	NA	NA	NA	NA	NA
TR43015|c0_g1_i4	65.7609	458.205	2.80069	0.00851562	0.546543	No	hypothetical protein MIMGU_mgv1a026830mg	Mimulus guttatus	NA	NA	kinase activity[GO:0016301]	NA	NA
TR38821|c1_g5_i5	97.5807	676.937	2.79435	0.00758108	0.523362	No	NA	NA	NA	NA	NA	NA	NA
TR2655|c0_g5_i9	91.2168	631.682	2.79183	0.00775351	0.526418	No	hypothetical protein MIMGU_mgv1a016610mg	Mimulus guttatus	NA	protein targeting[GO:0006605] ; protein transmembrane transport[GO:0071806]	P-P-bond-hydrolysis-driven protein transmembrane transporter activity[GO:0015450]	intracellular[GO:0005622] ; integral component of membrane[GO:0016021]	NA
TR40516|c0_g3_i1	29.6985	205.532	2.7909	0.0126232	0.612172	No	hypothetical protein MIMGU_mgv1a001196mg	Mimulus guttatus	NA	metabolic process[GO:0008152]	catalytic activity[GO:0003824]	NA	NA
TR29041|c0_g2_i4	97.5807	671.28	2.78225	0.00782617	0.526996	No	PREDICTED: 30S ribosomal protein S13, chloroplastic	Sesamum indicum	NA	NA	NA	NA	NA
TR35271|c1_g2_i3	207.889	1429.3	2.78142	0.00831788	0.54061	No	LEC2_CLALURecName: Full=Agglutinin-2; AltName: Full=Agglutinin II; AltName: Full=ClAII; AltName: Full=LecClAII; Flags: Precursor	Cladrastis kentukea	NA	NA	NA	NA	NA
TR30584|c1_g1_i7	86.9741	597.741	2.78086	0.00808948	0.534218	No	NA	NA	NA	NA	NA	NA	NA
TR39653|c0_g5_i1	23.3345	160.278	2.78003	0.0136911	0.628354	No	hypothetical protein MIMGU_mgv1a005592mg	Mimulus guttatus	NA	metabolic process[GO:0008152]	GTP binding[GO:0005525] ; GTPase activity[GO:0003924]	cytoplasm[GO:0005737]	NA
TR7467|c0_g1_i2	46.669	320.555	2.78003	0.0103336	0.583052	No	PREDICTED: WEB family protein At5g55860-like	Sesamum indicum	NA	NA	NA	NA	NA
TR39328|c1_g1_i1	14.8492	101.823	2.77761	0.0124473	0.609397	No	PREDICTED: glutathione reductase, chloroplastic	Sesamum indicum	NA	NA	NA	NA	NA
TR30544|c2_g1_i1	29.6985	203.647	2.77761	0.013025	0.617801	No	PREDICTED: remorin	Cucumis melo	NA	NA	NA	NA	NA
TR33825|c0_g1_i5	59.397	407.294	2.77761	0.00944342	0.564626	No	hypothetical protein MIMGU_mgv1a009284mg	Mimulus guttatus	NA	NA	NA	membrane[GO:0016020]	NA
TR30853|c0_g4_i1	50.9117	348.839	2.77649	0.0100515	0.579068	No	PREDICTED: uncharacterized protein LOC105160689	Sesamum indicum	NA	NA	NA	NA	NA
TR35838|c1_g4_i2	36.0624	247.016	2.77604	0.0120169	0.599767	No	NA	NA	NA	NA	NA	NA	NA
TR39740|c2_g5_i4	72.1249	494.032	2.77604	0.00875884	0.54928	No	PREDICTED: delta(8)-fatty-acid desaturase-like	Sesamum indicum	NA	NA	NA	NA	NA
TR37011|c0_g6_i6	57.2756	392.209	2.77563	0.00963291	0.570146	No	PREDICTED: uncharacterized protein LOC105175002 isoform X2	Sesamum indicum	NA	NA	NA	NA	NA
TR30093|c0_g3_i2	21.2132	145.193	2.77493	0.014083	0.638493	No	hypothetical protein MIMGU_mgv1a011861mg	Mimulus guttatus	NA	oxidation-reduction process[GO:0055114]	oxidoreductase activity[GO:0016491]	NA	NA
TR3678|c0_g1_i1	171.827	1174.74	2.77331	0.00797583	0.531843	No	PREDICTED: 7-deoxyloganetin glucosyltransferase-like	Sesamum indicum	NA	NA	NA	NA	NA
TR29089|c0_g1_i7	55.1543	375.238	2.76626	0.0100175	0.577918	No	PREDICTED: uncharacterized protein LOC105967667	Erythranthe guttatus	NA	NA	NA	NA	NA
TR27979|c0_g1_i1	254.558	1731	2.76553	0.00953066	0.567364	No	PREDICTED: chlorophyll a-b binding protein CP24 10A, chloroplastic	Cucumis melo	NA	NA	NA	NA	NA
TR41286|c1_g1_i2	343.654	2336.28	2.76519	0.0118885	0.599181	No	PREDICTED: probable LRR receptor-like serine/threonine-protein kinase At3g47570-like	Solanum tuberosum	NA	NA	NA	NA	NA
TR31837|c0_g4_i4	29.6985	201.761	2.76419	0.0134408	0.625956	No	PREDICTED: chaperone protein dnaJ 8, chloroplastic	Sesamum indicum	NA	NA	NA	NA	NA
TR34082|c0_g1_i4	226.981	1531.12	2.75394	0.00918533	0.556485	No	PREDICTED: ribulose-phosphate 3-epimerase, chloroplastic	Sesamum indicum	NA	NA	NA	NA	NA
TR20144|c0_g1_i2	36.0624	243.245	2.75384	0.0127134	0.612211	No	PREDICTED: pinin	Sesamum indicum	NA	NA	NA	NA	NA
TR35699|c0_g6_i6	25.4558	171.591	2.75291	0.0142681	0.636347	No	hypothetical protein PRUPE_ppa016117mg, partial	Prunus persica	NA	myo-inositol hexakisphosphate biosynthetic process[GO:0010264] ; photosystem II assembly[GO:0010207]	NA	chloroplast[GO:0009507]	NA
TR2250|c2_g2_i2	125.158	842.871	2.75156	0.00819328	0.537615	No	Sal m 1 allergen	Salvia miltiorrhiza	NA	response to biotic stimulus[GO:0009607] ; defense response[GO:0006952]	NA	NA	NA
TR43187|c2_g5_i1	14.8492	99.9378	2.75064	0.0129953	0.61782	No	PREDICTED: oligopeptide transporter 5-like	Sesamum indicum	NA	NA	NA	NA	NA
TR30771|c1_g1_i2	613.062	4123.85	2.74989	0.0209952	0.714496	No	PREDICTED: pleiotropic drug resistance protein 2-like, partial	Erythranthe guttatus	NA	NA	NA	NA	NA
TR36049|c3_g4_i2	48.7904	328.098	2.74946	0.0109605	0.590059	No	PREDICTED: uncharacterized protein LOC105156041	Sesamum indicum	NA	NA	NA	NA	NA
TR34407|c0_g1_i1	72.1249	484.604	2.74824	0.00943161	0.564742	No	PREDICTED: cinnamoyl-CoA reductase 1-like	Sesamum indicum	NA	NA	NA	NA	NA
TR41753|c0_g2_i1	167.584	1125.71	2.74788	0.0084292	0.545256	No	PREDICTED: probable nucleoredoxin 1	Sesamum indicum	NA	NA	NA	NA	NA
TR30109|c0_g2_i1	1120.06	7521.73	2.74749	0.0418559	0.79929	No	PREDICTED: auxin-binding protein ABP19a-like	Sesamum indicum	NA	NA	NA	NA	NA
TR42679|c0_g5_i1	23.3345	156.506	2.74568	0.0147898	0.642185	No	PREDICTED: zinc finger CCCH domain-containing protein 48-like	Sesamum indicum	NA	NA	NA	NA	NA
TR35089|c0_g1_i2	50.9117	341.297	2.74496	0.0108955	0.590425	No	hypothetical protein M569_11621	Genlisea aurea	NA	NA	NA	NA	NA
TR40170|c1_g3_i3	27.5772	184.791	2.74435	0.0142885	0.636567	No	PREDICTED: uncharacterized protein LOC105174992	Sesamum indicum	NA	NA	NA	NA	NA
TR2167|c0_g1_i4	55.1543	369.581	2.74435	0.0106	0.585221	No	NA	NA	NA	NA	NA	NA	NA
TR32133|c0_g1_i2	44.5477	297.928	2.74154	0.0116964	0.597561	No	PREDICTED: chitinase 6-like	Sesamum indicum	NA	NA	NA	NA	NA
TR36213|c0_g4_i2	53.033	354.496	2.74081	0.0108509	0.589566	No	hypothetical protein MIMGU_mgv1a010951mg	Mimulus guttatus	NA	NA	NA	membrane[GO:0016020]	NA
TR3898|c1_g2_i3	719.128	4804.55	2.74008	0.0252122	0.73867	No	PREDICTED: ribosome-binding factor PSRP1, chloroplastic	Sesamum indicum	NA	NA	NA	NA	NA
TR34353|c2_g2_i2	108.187	720.306	2.73508	0.00868006	0.547684	No	unnamed protein product	Coffea canephora	NA	protein folding[GO:0006457]	NA	cytoplasm[GO:0005737]	NA
TR32998|c1_g2_i1	53.033	352.611	2.73311	0.0110656	0.592607	No	PREDICTED: imidazoleglycerol-phosphate dehydratase-like	Sesamum indicum	NA	NA	NA	NA	NA
TR34361|c0_g2_i1	48.7904	324.326	2.73278	0.0114424	0.596458	No	hypothetical protein MIMGU_mgv1a013659mg	Mimulus guttatus	NA	NA	NA	NA	NA
TR39520|c1_g6_i1	163.342	1084.23	2.73071	0.00874462	0.550911	No	AChain A, Crystal Structure Of The Saposin-Like Domain Of Plant Aspartic Protease From Solanum Tuberosum	Solanum tuberosum	NA	proteolysis[GO:0006508] ; lipid metabolic process[GO:0006629]	aspartic-type endopeptidase activity[GO:0004190]	NA	NA
TR39594|c0_g1_i1	129.401	857.956	2.72906	0.00866103	0.547324	No	PREDICTED: probable aminotransferase ACS10	Sesamum indicum	NA	NA	NA	NA	NA
TR35838|c1_g5_i7	19.0919	126.336	2.72624	0.0155739	0.650115	No	PREDICTED: uncharacterized protein LOC105170041	Sesamum indicum	NA	NA	NA	NA	NA
TR39063|c0_g1_i4	61.5183	405.408	2.72029	0.0108159	0.590004	No	PREDICTED: uncharacterized protein LOC105177301	Sesamum indicum	NA	NA	NA	NA	NA
TR35833|c0_g2_i3	144.25	950.352	2.71989	0.0088672	0.554382	No	PREDICTED: putative receptor-like protein kinase At1g72540	Sesamum indicum	NA	NA	NA	NA	NA
TR38334|c0_g2_i2	10.6066	69.7679	2.7176	0.00853513	0.546089	No	hypothetical protein MIMGU_mgv1a010099mg	Mimulus guttatus	NA	NA	NA	NA	NA
TR40814|c0_g4_i1	31.8198	209.304	2.7176	0.0146786	0.64074	No	PREDICTED: two-component response regulator-like APRR5	Sesamum indicum	NA	NA	NA	NA	NA
TR31223|c0_g1_i1	59.397	390.323	2.71621	0.0110809	0.591114	No	PREDICTED: uncharacterized protein LOC105172147	Sesamum indicum	NA	NA	NA	NA	NA
TR44593|c0_g1_i7	59.397	390.323	2.71621	0.0110809	0.590347	No	PREDICTED: probable LRR receptor-like serine/threonine-protein kinase At1g06840	Sesamum indicum	NA	NA	NA	NA	NA
TR37100|c0_g1_i5	156.978	1031.43	2.71602	0.00901219	0.558348	No	PREDICTED: purple acid phosphatase 2-like	Sesamum indicum	NA	NA	NA	NA	NA
TR36558|c0_g7_i1	16.9706	111.251	2.71272	0.015326	0.648332	No	PREDICTED: putative lysine-specific demethylase JMJD5	Sesamum indicum	NA	NA	NA	NA	NA
TR43724|c0_g6_i2	16.9706	111.251	2.71272	0.015326	0.647665	No	PREDICTED: 2-oxoglutarate dehydrogenase, mitochondrial-like	Citrus sinensis	NA	NA	NA	NA	NA
TR37714|c0_g2_i1	50.9117	333.754	2.71272	0.0118309	0.598481	No	hypothetical protein JCGZ_13151	Jatropha curcas	NA	NA	selenium binding[GO:0008430]	NA	NA
TR35833|c0_g2_i1	125.158	820.244	2.7123	0.00905058	0.558201	No	PREDICTED: putative receptor-like protein kinase At1g72540	Sesamum indicum	NA	NA	NA	NA	NA
TR4078|c2_g1_i6	137.886	903.211	2.71159	0.00904091	0.559284	No	PREDICTED: uncharacterized protein LOC105173489 isoform X1	Sesamum indicum	NA	NA	NA	NA	NA
TR37808|c0_g1_i3	40.3051	263.987	2.71143	0.0133472	0.624429	No	PREDICTED: GTP-binding protein At2g22870	Nelumbo nucifera	NA	NA	NA	NA	NA
TR41608|c0_g2_i3	23.3345	152.735	2.71049	0.0159929	0.656269	No	PREDICTED: uncharacterized protein LOC105162694	Sesamum indicum	NA	NA	NA	NA	NA
TR3659|c1_g2_i2	53.033	346.954	2.70978	0.0117396	0.598281	No	PREDICTED: arogenate dehydratase/prephenate dehydratase 6, chloroplastic-like	Sesamum indicum	NA	NA	NA	NA	NA
TR28770|c0_g1_i2	36.0624	235.702	2.7084	0.0142469	0.636093	No	PREDICTED: uncharacterized protein LOC105169903	Sesamum indicum	NA	NA	NA	NA	NA
TR31912|c1_g1_i1	222.739	1455.7	2.70829	0.0100599	0.578739	No	hypothetical protein POPTR_0018s01830g	Populus trichocarpa	NA	ATP synthesis coupled proton transport[GO:0015986]	hydrogen ion transmembrane transporter activity[GO:0015078]	integral component of membrane[GO:0016021] ; proton-transporting ATP synthase complex, coupling factor F(o)[GO:0045263]	NA
TR35300|c0_g1_i3	38.1838	248.902	2.70454	0.0139788	0.634465	No	PREDICTED: 1-aminocyclopropane-1-carboxylate oxidase homolog 1-like isoform X1	Sesamum indicum	NA	NA	NA	NA	NA
TR27922|c0_g1_i1	133.643	869.27	2.70142	0.00927559	0.559477	No	PREDICTED: uncharacterized protein LOC105176133	Sesamum indicum	NA	NA	NA	NA	NA
TR42670|c0_g8_i1	40.3051	262.101	2.70109	0.0137046	0.62827	No	PREDICTED: acetyl-coenzyme A synthetase, chloroplastic/glyoxysomal-like	Nelumbo nucifera	NA	NA	NA	NA	NA
TR42504|c1_g3_i9	48.7904	316.784	2.69883	0.012487	0.609164	No	PREDICTED: LOW QUALITY PROTEIN: uncharacterized protein LOC105177661	Sesamum indicum	NA	NA	NA	NA	NA
TR3151|c0_g2_i1	1096.72	7120.09	2.6987	0.042634	0.800748	No	PREDICTED: acid phosphatase 1-like	Solanum lycopersicum	NA	NA	NA	NA	NA
TR28876|c1_g2_i1	21.2132	137.65	2.69797	0.0166078	0.664247	No	hypothetical protein MIMGU_mgv1a004734mg	Mimulus guttatus	NA	glycolytic process[GO:0006096]	potassium ion binding[GO:0030955] ; pyruvate kinase activity[GO:0004743] ; magnesium ion binding[GO:0000287] ; kinase activity[GO:0016301]	NA	map01130:Biosynthesis of antibiotics(kinase[ec:2.7.1.40]) ; map00620:Pyruvate metabolism(kinase[ec:2.7.1.40]) ; map00010:Glycolysis / Gluconeogenesis(kinase[ec:2.7.1.40]) ; map00230:Purine metabolism(kinase[ec:2.7.1.40])
TR34069|c0_g4_i1	161.22	1044.63	2.69589	0.00949187	0.565875	No	hypothetical protein MIMGU_mgv1a008007mg	Mimulus guttatus	NA	proteolysis[GO:0006508]	serine-type endopeptidase activity[GO:0004252]	NA	NA
TR41911|c1_g6_i2	14.8492	96.1665	2.69515	0.0141899	0.639107	No	PREDICTED: myosin-14	Sesamum indicum	NA	NA	NA	NA	NA
TR2188|c0_g1_i6	76.3675	494.032	2.69357	0.0106605	0.586201	No	hypothetical protein MIMGU_mgv1a014044mg	Mimulus guttatus	NA	response to stress[GO:0006950]	NA	NA	NA
TR33273|c0_g1_i1	61.5183	397.865	2.69319	0.0116017	0.595689	No	PREDICTED: carboxymethylenebutenolidase homolog	Sesamum indicum	NA	NA	NA	NA	NA
TR40635|c1_g1_i1	48.7904	314.898	2.69022	0.0127662	0.611883	No	PREDICTED: phosphoglucan phosphatase DSP4, chloroplastic-like	Fragaria vesca subsp. vesca	NA	NA	NA	NA	NA
TR31494|c0_g4_i3	25.4558	164.049	2.68806	0.01652	0.663968	No	hypothetical protein JCGZ_00753	Jatropha curcas	NA	negative regulation of transcription, DNA-templated[GO:0045892] ; oxidation-reduction process[GO:0055114]	oxidoreductase activity[GO:0016491] ; FMN binding[GO:0010181]	NA	NA
TR38972|c1_g3_i1	76.3675	492.146	2.68806	0.0108162	0.589238	No	PREDICTED: uncharacterized protein LOC105172351	Sesamum indicum	NA	NA	NA	NA	NA
TR31966|c0_g4_i2	381.838	2460.73	2.68806	0.014861	0.643237	No	hypothetical protein MIMGU_mgv1a010248mg	Mimulus guttatus	NA	NA	NA	NA	NA
TR32143|c0_g2_i3	133.643	859.842	2.68569	0.00964804	0.57022	No	PREDICTED: uncharacterized protein LOC105167031	Sesamum indicum	NA	NA	NA	NA	NA
TR41624|c0_g3_i3	36.0624	231.931	2.68513	0.0150906	0.645019	No	NA	NA	NA	NA	NA	NA	NA
TR40255|c1_g2_i1	38.1838	245.13	2.68252	0.0147744	0.642195	No	hypothetical protein AMTR_s00046p00069700	Amborella trichopoda	NA	polyamine catabolic process[GO:0006598] ; coumarin biosynthetic process[GO:0009805] ; response to wounding[GO:0009611] ; methylation[GO:0032259] ; positive regulation of flavonoid biosynthetic process[GO:0009963] ; cellular modified amino acid biosynthetic process[GO:0042398] ; cysteine biosynthetic process[GO:0019344]	O-methyltransferase activity[GO:0008171]	NA	NA
TR7688|c0_g1_i4	120.915	774.989	2.68018	0.00984669	0.572893	No	PREDICTED: S-antigen protein-like	Sesamum indicum	NA	NA	NA	NA	NA
TR43266|c0_g10_i4	31.8198	203.647	2.67807	0.0161039	0.658194	No	PREDICTED: zinc finger protein CONSTANS-LIKE 9	Sesamum indicum	NA	NA	NA	NA	NA
TR38589|c0_g2_i1	23.3345	148.964	2.67442	0.0173109	0.673993	No	PREDICTED: ammonium transporter 1 member 3	Sesamum indicum	NA	NA	NA	NA	NA
TR30741|c0_g7_i1	483.661	3084.87	2.67314	0.0186625	0.682617	No	Chlorophyll a-b binding protein 13	Morus notabilis	NA	photosynthesis, light harvesting[GO:0009765] ; protein-chromophore linkage[GO:0018298]	metal ion binding[GO:0046872] ; chlorophyll binding[GO:0016168]	photosystem II[GO:0009523] ; integral component of membrane[GO:0016021] ; chloroplast[GO:0009507] ; photosystem I[GO:0009522]	NA
TR8205|c1_g6_i1	38.1838	243.245	2.67138	0.0151914	0.645964	No	hypothetical protein CISIN_1g0045481mg, partial	Citrus sinensis	NA	ion transmembrane transport[GO:0034220] ; regulation of ion transmembrane transport[GO:0034765]	voltage-gated ion channel activity[GO:0005244] ; calcium ion binding[GO:0005509]	integral component of membrane[GO:0016021]	NA
TR32103|c0_g1_i1	80.6102	512.888	2.66961	0.0111308	0.591475	No	PREDICTED: phenazine biosynthesis-like domain-containing protein 1	Sesamum indicum	NA	NA	NA	NA	NA
TR40516|c0_g2_i1	1236.73	7855.48	2.66717	0.0503424	0.826154	No	stachyose synthase	Stachys affinis	Lamiaceae	metabolic process[GO:0008152]	galactinol-raffinose galactosyltransferase activity[GO:0047268]	NA	map00052:Galactose metabolism(galactosyltransferase[ec:2.4.1.67])
TR35041|c0_g4_i6	91.2168	578.885	2.66591	0.0107945	0.589619	No	PREDICTED: probable ribose-5-phosphate isomerase 2	Sesamum indicum	NA	NA	NA	NA	NA
TR37920|c0_g3_i1	16.9706	107.48	2.66297	0.0167036	0.664841	No	NA	NA	NA	NA	NA	NA	NA
TR39005|c0_g4_i2	33.9411	214.96	2.66297	0.0163317	0.663544	No	PREDICTED: uncharacterized protein LOC105156918	Sesamum indicum	NA	NA	NA	NA	NA
TR32759|c1_g3_i6	33.9411	214.96	2.66297	0.0163317	0.662888	No	PREDICTED: uncharacterized protein LOC105159695 isoform X2	Sesamum indicum	NA	NA	NA	NA	NA
TR39534|c4_g1_i3	248.194	1568.83	2.66015	0.0117147	0.597757	No	PREDICTED: pleiotropic drug resistance protein 2-like	Sesamum indicum	NA	NA	NA	NA	NA
TR36690|c0_g1_i4	895.197	5654.97	2.65924	0.0351862	0.780825	No	hypothetical protein MIMGU_mgv1a024851mg	Mimulus guttatus	NA	NA	NA	NA	NA
TR7987|c0_g5_i3	21.2132	133.879	2.65789	0.0180565	0.676724	No	PREDICTED: protein BPS1, chloroplastic-like	Sesamum indicum	NA	NA	NA	NA	NA
TR42231|c0_g7_i1	42.4264	267.758	2.65789	0.0148867	0.643669	No	FtsZ-like protein	Nicotiana tabacum	NA	microtubule-based process[GO:0007017] ; metabolic process[GO:0008152] ; cell division[GO:0051301]	GTP binding[GO:0005525] ; GTPase activity[GO:0003924]	cytoplasm[GO:0005737] ; microtubule[GO:0005874]	NA
TR38905|c1_g2_i3	112.43	708.992	2.65674	0.0105509	0.584082	No	basic helix-loop-helix transcription factor	Salvia miltiorrhiza	NA	NA	protein dimerization activity[GO:0046983]	NA	NA
TR39957|c2_g1_i6	23.3345	147.078	2.65605	0.0180165	0.676459	No	PREDICTED: uncharacterized protein LOC105164663 isoform X1	Sesamum indicum	NA	NA	NA	NA	NA
TR42649|c2_g7_i4	129.401	814.587	2.65423	0.0104545	0.585052	No	PREDICTED: uncharacterized protein LOC105168700	Sesamum indicum	NA	NA	NA	NA	NA
TR38293|c0_g1_i3	27.5772	173.477	2.6532	0.017553	0.672579	No	PREDICTED: uncharacterized protein LOC105178178	Sesamum indicum	NA	NA	NA	NA	NA
TR31131|c0_g1_i2	201.525	1267.14	2.65254	0.0110005	0.59066	No	PREDICTED: uncharacterized protein LOC105161139	Sesamum indicum	NA	NA	NA	NA	NA
TR36472|c4_g1_i1	33.9411	213.075	2.65025	0.0168318	0.668647	No	NA	NA	NA	NA	NA	NA	NA
TR33176|c0_g2_i6	82.7315	518.545	2.64796	0.0116721	0.597811	No	PREDICTED: glutathione transferase GST 23-like	Sesamum indicum	NA	NA	NA	NA	NA
TR36892|c0_g2_i3	825.194	5170.36	2.64746	0.0326652	0.769796	No	plastid glutamine synthetase	Vigna radiata	NA	glutamine biosynthetic process[GO:0006542]	glutamate-ammonia ligase activity[GO:0004356] ; ATP binding[GO:0005524]	NA	map00220:Arginine biosynthesis(ligase[ec:6.3.1.2]) ; map00630:Glyoxylate and dicarboxylate metabolism(ligase[ec:6.3.1.2]) ; map00250:Alanine, aspartate and glutamate metabolism(ligase[ec:6.3.1.2]) ; map00910:Nitrogen metabolism(ligase[ec:6.3.1.2])
TR40434|c0_g2_i3	67.8823	424.264	2.64386	0.0126901	0.612524	No	PREDICTED: uncharacterized protein LOC105175433	Sesamum indicum	NA	NA	NA	NA	NA
TR33116|c0_g2_i6	80.6102	503.46	2.64284	0.0119368	0.60014	No	NA	NA	NA	NA	NA	NA	NA
TR31880|c4_g3_i1	2208.29	13791.4	2.64277	0.0966962	0.949759	No	hypothetical protein MIMGU_mgv1a012938mg	Mimulus guttatus	NA	peroxisome fission[GO:0016559]	NA	integral component of peroxisomal membrane[GO:0005779]	NA
TR36375|c1_g2_i4	14.8492	92.3953	2.63743	0.0155316	0.650334	No	hypothetical protein MIMGU_mgv1a010687mg	Mimulus guttatus	NA	NA	NA	NA	NA
TR32703|c1_g1_i1	21.2132	131.993	2.63743	0.0188328	0.682769	No	hypothetical protein MIMGU_mgv1a011677mg	Mimulus guttatus	NA	metabolic process[GO:0008152]	hydrolase activity[GO:0016787]	NA	NA
TR3036|c1_g2_i3	25.4558	158.392	2.63743	0.0184923	0.681859	No	NA	NA	NA	NA	NA	NA	NA
TR30112|c0_g1_i4	29.6985	184.791	2.63743	0.0179146	0.67884	No	PREDICTED: uncharacterized protein LOC105177328	Sesamum indicum	NA	NA	NA	NA	NA
TR35032|c1_g1_i3	116.673	725.963	2.63743	0.0110222	0.591052	No	PREDICTED: calreticulin-3-like isoform X1	Cicer arietinum	NA	NA	NA	NA	NA
TR39050|c0_g1_i2	178.191	1108.74	2.63743	0.0110748	0.592329	No	PREDICTED: uncharacterized protein LOC105176091	Sesamum indicum	NA	NA	NA	NA	NA
TR33095|c1_g1_i2	243.952	1516.04	2.63564	0.0122439	0.605941	No	PREDICTED: carbonic anhydrase, chloroplastic-like isoform X2	Sesamum indicum	NA	NA	NA	NA	NA
TR2950|c0_g1_i3	97.5807	605.283	2.63294	0.0115429	0.595651	No	PREDICTED: uncharacterized protein LOC105171306	Sesamum indicum	NA	NA	NA	NA	NA
TR36475|c0_g1_i2	1550.69	9618.54	2.63291	0.0664947	0.882214	No	hypothetical protein EUGRSUZ_I00886	Eucalyptus grandis	NA	NA	NA	NA	NA
TR31330|c3_g4_i3	186.676	1157.77	2.63274	0.0112972	0.594165	No	PREDICTED: oxygen-evolving enhancer protein 2-1, chloroplastic-like	Sesamum indicum	NA	NA	NA	NA	NA
TR40295|c0_g1_i4	131.522	814.587	2.63077	0.0110755	0.591595	No	NA	NA	NA	NA	NA	NA	NA
TR33259|c0_g1_i5	173.948	1076.69	2.62987	0.0112305	0.592177	No	PREDICTED: protein STRICTOSIDINE SYNTHASE-LIKE 5-like	Sesamum indicum	NA	NA	NA	NA	NA
TR28826|c0_g1_i2	53.033	328.098	2.62916	0.0143871	0.634084	No	NA	NA	NA	NA	NA	NA	NA
TR35673|c0_g6_i3	50.9117	314.898	2.62882	0.0146461	0.640004	No	PREDICTED: PRA1 family protein A1	Sesamum indicum	NA	NA	NA	NA	NA
TR32213|c0_g8_i4	40.3051	248.902	2.62654	0.0165371	0.663358	No	NA	NA	NA	NA	NA	NA	NA
TR26987|c0_g1_i9	99.7021	614.711	2.62421	0.0117429	0.596967	No	NA	NA	NA	NA	NA	NA	NA
TR34503|c1_g4_i2	29.6985	182.905	2.62263	0.018515	0.681473	No	NA	NA	NA	NA	NA	NA	NA
TR7601|c0_g1_i2	284.257	1749.85	2.62197	0.0136126	0.625448	No	flavone 8-hydroxylase	Ocimum basilicum	Lamiaceae	oxidation-reduction process[GO:0055114]	metal ion binding[GO:0046872] ; 2 iron, 2 sulfur cluster binding[GO:0051537] ; chlorophyllide a oxygenase [overall] activity[GO:0010277]	NA	map00860:Porphyrin and chlorophyll metabolism(oxygenase[ec:1.14.13.122])
TR37701|c0_g1_i6	388.202	2389.08	2.62158	0.0169184	0.670146	No	PREDICTED: putative formamidase C869.04 isoform X1	Sesamum indicum	NA	NA	NA	NA	NA
TR42317|c0_g7_i2	53.033	326.212	2.62085	0.0146913	0.640616	No	PREDICTED: probable anion transporter 2, chloroplastic	Sesamum indicum	NA	NA	NA	NA	NA
TR40380|c0_g4_i1	25.4558	156.506	2.62015	0.0192109	0.687377	No	PREDICTED: probable receptor-like protein kinase At5g24010	Sesamum indicum	NA	NA	NA	NA	NA
TR43100|c0_g1_i4	65.7609	403.522	2.61735	0.013744	0.627274	No	hypothetical protein L484_022042	Morus notabilis	NA	NA	NA	NA	NA
TR42012|c0_g3_i1	21.2132	130.108	2.61667	0.0196461	0.694476	No	PREDICTED: formate--tetrahydrofolate ligase-like	Camelina sativa	NA	NA	NA	NA	NA
TR32762|c0_g1_i1	1822.21	11172.3	2.61616	0.0800572	0.92087	No	Type I (26 kD) CP29 polypeptide	Solanum lycopersicum	NA	photosynthesis, light harvesting[GO:0009765] ; protein-chromophore linkage[GO:0018298]	metal ion binding[GO:0046872] ; chlorophyll binding[GO:0016168]	photosystem II[GO:0009523] ; integral component of membrane[GO:0016021] ; chloroplast[GO:0009507] ; photosystem I[GO:0009522]	NA
TR39362|c1_g1_i2	163.342	1001.26	2.61586	0.0115245	0.595446	No	PREDICTED: probable pectate lyase 8	Sesamum indicum	NA	NA	NA	NA	NA
TR24264|c0_g1_i1	19.0919	116.908	2.61435	0.0193229	0.687193	No	PREDICTED: uncharacterized protein LOC105158090 isoform X2	Sesamum indicum	NA	NA	NA	NA	NA
TR34503|c1_g2_i6	19.0919	116.908	2.61435	0.0193229	0.686598	No	PREDICTED: fructose-bisphosphate aldolase 1, chloroplastic	Sesamum indicum	NA	NA	NA	NA	NA
TR42913|c1_g11_i2	38.1838	233.817	2.61435	0.0174857	0.674405	No	NA	NA	NA	NA	NA	NA	NA
TR35041|c0_g4_i4	103.945	635.453	2.61197	0.0120037	0.600564	No	hypothetical protein MIMGU_mgv1a011534mg	Mimulus guttatus	NA	pentose-phosphate shunt, non-oxidative branch[GO:0009052]	ribose-5-phosphate isomerase activity[GO:0004751]	NA	map00030:Pentose phosphate pathway(isomerase[ec:5.3.1.6]) ; map01130:Biosynthesis of antibiotics(isomerase[ec:5.3.1.6]) ; map00051:Fructose and mannose metabolism(isomerase[ec:5.3.1.6]) ; map00710:Carbon fixation in photosynthetic organisms(isomerase[ec:5.3.1.6])
TR25782|c0_g1_i3	16.9706	103.709	2.61143	0.0182032	0.67974	No	NA	NA	NA	NA	NA	NA	NA
TR35734|c0_g1_i6	133.643	816.473	2.61102	0.0116234	0.596057	No	PREDICTED: uncharacterized protein LOC105177167	Sesamum indicum	NA	NA	NA	NA	NA
TR29096|c0_g2_i2	82.7315	505.346	2.61076	0.0128564	0.615489	No	PREDICTED: uncharacterized protein LOC105960631	Erythranthe guttatus	NA	NA	NA	NA	NA
TR29687|c0_g4_i3	31.8198	194.219	2.60968	0.0188263	0.68374	No	PREDICTED: uncharacterized protein LOC105168722	Sesamum indicum	NA	NA	NA	NA	NA
TR36918|c0_g1_i5	31.8198	194.219	2.60968	0.0188263	0.683136	No	PREDICTED: uncharacterized protein LOC105170638 isoform X2	Sesamum indicum	NA	NA	NA	NA	NA
TR37634|c0_g1_i3	78.4889	478.947	2.60931	0.0131463	0.619261	No	hypothetical protein MIMGU_mgv1a013946mg	Mimulus guttatus	NA	NA	NA	NA	NA
TR36232|c0_g8_i3	42.4264	258.33	2.60618	0.0169585	0.671084	No	NA	NA	NA	NA	NA	NA	NA
TR30703|c0_g4_i4	451.841	2751.12	2.60613	0.0196165	0.694027	No	PREDICTED: ATP synthase delta chain, chloroplastic-like	Sesamum indicum	NA	NA	NA	NA	NA
TR36101|c0_g1_i7	288.5	1755.51	2.60525	0.0141971	0.638731	No	PREDICTED: uncharacterized protein LOC105158378	Sesamum indicum	NA	NA	NA	NA	NA
TR26868|c0_g2_i3	818.83	4974.26	2.60285	0.0341689	0.781471	No	PREDICTED: photosystem I subunit O	Sesamum indicum	NA	NA	NA	NA	NA
TR2361|c2_g1_i1	381.838	2315.54	2.60032	0.0173452	0.671508	No	terpene synthase 3	Origanum vulgare	Lamiaceae	metabolic process[GO:0008152]	magnesium ion binding[GO:0000287] ; terpene synthase activity[GO:0010333]	NA	NA
TR3712|c1_g1_i6	46.669	282.843	2.59946	0.0164392	0.664622	No	PREDICTED: uncharacterized protein LOC105156381	Sesamum indicum	NA	NA	NA	NA	NA
TR38803|c0_g6_i5	80.6102	488.375	2.59896	0.013375	0.62502	No	cytochrome P450 CYP76A35	Salvia miltiorrhiza	NA	oxidation-reduction process[GO:0055114]	heme binding[GO:0020037] ; oxidoreductase activity, acting on paired donors, with incorporation or reduction of molecular oxygen[GO:0016705] ; monooxygenase activity[GO:0004497] ; iron ion binding[GO:0005506]	integral component of membrane[GO:0016021]	NA
TR36139|c0_g1_i5	55.1543	333.754	2.59724	0.015357	0.646315	No	NA	NA	NA	NA	NA	NA	NA
TR3678|c0_g1_i2	55.1543	333.754	2.59724	0.015357	0.645654	No	unnamed protein product	Coffea canephora	NA	metabolic process[GO:0008152]	transferase activity, transferring hexosyl groups[GO:0016758]	NA	NA
TR23821|c0_g1_i1	21.2132	128.222	2.59561	0.020498	0.708733	No	hypothetical protein MIMGU_mgv1a020063mg	Mimulus guttatus	NA	NA	calcium ion binding[GO:0005509]	NA	NA
TR31479|c0_g2_i1	21.2132	128.222	2.59561	0.020498	0.70933	No	NA	NA	NA	NA	NA	NA	NA
TR24342|c2_g1_i1	53.033	320.555	2.59561	0.0156528	0.650761	No	PREDICTED: F-box/LRR-repeat protein 14 isoform X2	Nicotiana sylvestris	NA	NA	NA	NA	NA
TR42225|c1_g1_i1	133.643	807.045	2.59426	0.0121177	0.601869	No	PREDICTED: cellulose synthase-like protein G3	Sesamum indicum	NA	NA	NA	NA	NA
TR31277|c1_g1_i1	50.9117	307.356	2.59384	0.0159991	0.655868	No	PREDICTED: probable serine/threonine-protein kinase Cx32, chloroplastic isoform X2	Sesamum indicum	NA	NA	NA	NA	NA
TR37926|c0_g2_i6	91.2168	550.6	2.59363	0.0130182	0.618189	No	PREDICTED: uncharacterized calcium-binding protein At1g02270	Sesamum indicum	NA	NA	NA	NA	NA
TR40019|c0_g2_i8	40.3051	243.245	2.59337	0.0179511	0.678344	No	hypothetical protein MIMGU_mgv1a008527mg	Mimulus guttatus	NA	tetrapyrrole biosynthetic process[GO:0033014] ; peptidyl-pyrromethane cofactor linkage[GO:0018160]	hydroxymethylbilane synthase activity[GO:0004418]	NA	map00860:Porphyrin and chlorophyll metabolism(synthase[ec:2.5.1.61])
TR43800|c2_g8_i5	40.3051	243.245	2.59337	0.0179511	0.678968	No	PREDICTED: dihydrolipoyllysine-residue acetyltransferase component 5 of pyruvate dehydrogenase complex, chloroplastic	Sesamum indicum	NA	NA	NA	NA	NA
TR42933|c0_g3_i1	409.415	2470.16	2.59297	0.0185365	0.681653	No	PREDICTED: beta-galactosidase 8-like	Sesamum indicum	NA	NA	NA	NA	NA
TR38396|c1_g2_i5	360.624	2168.46	2.5881	0.0169935	0.671826	No	PREDICTED: uncharacterized protein LOC105158308	Sesamum indicum	NA	NA	NA	NA	NA
TR30424|c0_g2_i1	659.731	3959.8	2.58548	0.0282753	0.750767	No	chlorophyll A/B binding protein, putative	Ricinus communis	NA	photosynthesis, light harvesting[GO:0009765] ; protein-chromophore linkage[GO:0018298]	metal ion binding[GO:0046872] ; chlorophyll binding[GO:0016168]	photosystem II[GO:0009523] ; integral component of membrane[GO:0016021] ; chloroplast[GO:0009507] ; photosystem I[GO:0009522]	NA
TR30936|c0_g4_i2	16.9706	101.823	2.58496	0.0190089	0.685521	No	PREDICTED: probable serine/threonine-protein kinase At1g01540	Sesamum indicum	NA	NA	NA	NA	NA
TR33229|c0_g3_i2	16.9706	101.823	2.58496	0.0190089	0.684919	No	PREDICTED: probable strigolactone esterase D14 homolog	Sesamum indicum	NA	NA	NA	NA	NA
TR36341|c1_g2_i4	33.9411	203.647	2.58496	0.0195978	0.693965	No	hypothetical protein MIMGU_mgv1a004750mg	Mimulus guttatus	NA	transport[GO:0006810]	transporter activity[GO:0005215]	integral component of membrane[GO:0016021]	NA
TR26704|c1_g1_i2	67.8823	407.294	2.58496	0.0147518	0.64189	No	PREDICTED: plasma membrane ATPase 4-like	Sesamum indicum	NA	NA	NA	NA	NA
TR43437|c1_g3_i2	193.04	1157.77	2.58438	0.0127259	0.612095	No	PREDICTED: metacaspase-4	Sesamum indicum	NA	NA	NA	NA	NA
TR38253|c0_g1_i1	89.0955	533.63	2.58242	0.0134976	0.625764	No	PREDICTED: probable LRR receptor-like serine/threonine-protein kinase At1g56140	Nicotiana tomentosiformis	NA	NA	NA	NA	NA
TR38673|c1_g1_i7	46.669	279.071	2.5801	0.0172607	0.674596	No	PREDICTED: uncharacterized protein LOC105159671 isoform X2	Sesamum indicum	NA	NA	NA	NA	NA
TR7851|c0_g2_i3	99.7021	595.855	2.57927	0.0131767	0.619276	No	hypothetical protein MIMGU_mgv1a022002mg	Mimulus guttatus	NA	NA	nucleic acid binding[GO:0003676] ; nucleotide binding[GO:0000166]	integral component of membrane[GO:0016021]	NA
TR29266|c1_g4_i1	207.889	1240.74	2.57731	0.0131607	0.619232	No	hypothetical protein MIMGU_mgv1a015373mg	Mimulus guttatus	NA	NA	NA	NA	NA
TR31602|c0_g1_i2	740.341	4410.46	2.57467	0.0320229	0.764752	No	PREDICTED: uncharacterized protein LOC105169586	Sesamum indicum	NA	NA	NA	NA	NA
TR43986|c2_g5_i1	27.5772	164.049	2.57258	0.0210019	0.712366	No	AF110228_1nuclear RNA binding protein A	Spinacia oleracea	NA	NA	NA	NA	NA
TR43187|c2_g6_i1	67.8823	403.522	2.57154	0.0152614	0.646934	No	PREDICTED: oligopeptide transporter 5-like	Sesamum indicum	NA	NA	NA	NA	NA
TR36671|c1_g1_i2	53.033	314.898	2.56992	0.0166928	0.665057	No	PREDICTED: disease resistance protein RPM1-like isoform X1	Erythranthe guttatus	NA	NA	NA	NA	NA
TR33385|c0_g1_i1	137.886	818.358	2.56926	0.0128688	0.615363	No	PREDICTED: cytochrome P450 84A1-like	Sesamum indicum	NA	NA	NA	NA	NA
TR43412|c0_g1_i5	975.807	5785.08	2.56767	0.0426466	0.800617	No	PREDICTED: phosphomethylpyrimidine synthase, chloroplastic isoform X2	Sesamum indicum	NA	NA	NA	NA	NA
TR25741|c0_g1_i3	19.0919	113.137	2.56704	0.0210791	0.713804	No	hypothetical protein MIMGU_mgv1a0043831mg, partial	Mimulus guttatus	NA	NA	calcium ion binding[GO:0005509]	NA	NA
TR30848|c1_g2_i1	19.0919	113.137	2.56704	0.0210791	0.713216	No	NA	NA	NA	NA	NA	NA	NA
TR40546|c0_g2_i1	25.4558	150.849	2.56704	0.0215719	0.714009	No	PREDICTED: MATE efflux family protein 2, chloroplastic	Sesamum indicum	NA	NA	NA	NA	NA
TR27334|c0_g1_i1	23.3345	137.65	2.56047	0.0220755	0.717953	No	NA	NA	NA	NA	NA	NA	NA
TR34126|c0_g2_i1	23.3345	137.65	2.56047	0.0220755	0.717385	No	NA	NA	NA	NA	NA	NA	NA
TR31831|c1_g3_i1	460.327	2709.63	2.55737	0.0215945	0.713036	No	chlorophyll a/b-binding protein type I	Malus domestica	NA	NA	NA	NA	NA
TR37063|c3_g3_i1	48.7904	286.614	2.55444	0.0180153	0.677034	No	PREDICTED: glycine--tRNA ligase 1, mitochondrial-like	Nicotiana sylvestris	NA	NA	NA	NA	NA
TR2260|c0_g3_i2	224.86	1319.93	2.55337	0.0142029	0.637593	No	hypothetical protein MIMGU_mgv1a014261mg	Mimulus guttatus	NA	NA	NA	NA	NA
TR37183|c0_g1_i1	123.037	722.192	2.55329	0.0135267	0.625701	No	PREDICTED: putative amidase C869.01-like isoform X2	Citrus sinensis	NA	NA	NA	NA	NA
TR38361|c0_g2_i1	21.2132	124.451	2.55254	0.0223256	0.722084	No	PREDICTED: omega-6 fatty acid desaturase, endoplasmic reticulum isozyme 2-like, partial	Malus domestica	NA	NA	NA	NA	NA
TR40411|c0_g1_i1	21.2132	124.451	2.55254	0.0223256	0.721516	No	PREDICTED: uncharacterized protein LOC105162629	Sesamum indicum	NA	NA	NA	NA	NA
TR37991|c0_g3_i2	163.342	957.894	2.55197	0.0134331	0.626307	No	malate dehydrogenase, glyoxysomal	Genlisea aurea	NA	carbohydrate metabolic process[GO:0005975] ; malate metabolic process[GO:0006108] ; tricarboxylic acid cycle[GO:0006099]	L-malate dehydrogenase activity[GO:0030060]	NA	map00630:Glyoxylate and dicarboxylate metabolism(dehydrogenase[ec:1.1.1.37]) ; map01130:Biosynthesis of antibiotics(dehydrogenase[ec:1.1.1.37]) ; map00720:Carbon fixation pathways in prokaryotes(dehydrogenase[ec:1.1.1.37]) ; map00020:Citrate cycle (TCA cycle)(dehydrogenase[ec:1.1.1.37]) ; map00620:Pyruvate metabolism(dehydrogenase[ec:1.1.1.37]) ; map00270:Cysteine and methionine metabolism(dehydr…
TR3283|c0_g6_i7	178.191	1044.63	2.5515	0.0135582	0.626454	No	PREDICTED: upstream activation factor subunit spp27-like	Sesamum indicum	NA	NA	NA	NA	NA
TR29552|c0_g1_i1	1663.12	9742.99	2.55048	0.0761998	0.910938	No	putative aldo/keto reductase 1	Salvia miltiorrhiza	NA	NA	NA	NA	NA
TR40900|c0_g9_i6	36.0624	211.189	2.54997	0.0208509	0.711948	No	PREDICTED: protein NRT1/ PTR FAMILY 3.1-like	Sesamum indicum	NA	NA	NA	NA	NA
TR3850|c0_g1_i1	239.709	1401.01	2.54711	0.0147126	0.640865	No	unnamed protein product	Coffea canephora	NA	cell wall organization[GO:0071555] ; xyloglucan metabolic process[GO:0010411] ; cell wall biogenesis[GO:0042546]	xyloglucan:xyloglucosyl transferase activity[GO:0016762] ; hydrolase activity, hydrolyzing O-glycosyl compounds[GO:0004553]	cell wall[GO:0005618] ; apoplast[GO:0048046]	NA
TR24701|c0_g2_i1	14.8492	86.7384	2.54628	0.0178697	0.678389	No	NA	NA	NA	NA	NA	NA	NA
TR37899|c0_g6_i3	44.5477	260.215	2.54628	0.0192133	0.686863	No	PREDICTED: phytochrome A-associated F-box protein	Erythranthe guttatus	NA	NA	NA	NA	NA
TR37701|c0_g1_i2	347.897	2030.81	2.54533	0.0179234	0.678546	No	PREDICTED: putative formamidase C869.04 isoform X2	Sesamum indicum	NA	NA	NA	NA	NA
TR33108|c0_g1_i1	131.522	767.447	2.54476	0.0137172	0.628145	No	PREDICTED: uncharacterized protein LOC104246111 isoform X1	Nicotiana sylvestris	NA	NA	NA	NA	NA
TR39594|c0_g1_i2	106.066	618.483	2.54377	0.0142133	0.637365	No	NA	NA	NA	NA	NA	NA	NA
TR3602|c1_g1_i8	38.1838	222.503	2.54279	0.0207677	0.710288	No	NA	NA	NA	NA	NA	NA	NA
TR37612|c1_g6_i3	286.378	1668.77	2.54279	0.0160426	0.656342	No	PREDICTED: uncharacterized protein LOC105164832	Sesamum indicum	NA	NA	NA	NA	NA
TR35050|c0_g2_i2	226.981	1321.82	2.54188	0.0146111	0.639835	No	NA	NA	NA	NA	NA	NA	NA
TR35255|c1_g3_i1	7984.65	46459.7	2.54068	0.341031	1.11433	No	PREDICTED: chlorophyll a-b binding protein CP29.2, chloroplastic-like	Solanum lycopersicum	NA	response to light stimulus[GO:0009416] ; protein-chromophore linkage[GO:0018298] ; photosynthesis, light harvesting in photosystem I[GO:0009768]	chlorophyll binding[GO:0016168] ; metal ion binding[GO:0046872] ; pigment binding[GO:0031409]	integral component of membrane[GO:0016021] ; photosystem I[GO:0009522] ; chloroplast envelope[GO:0009941] ; chloroplast thylakoid membrane[GO:0009535] ; photosystem II[GO:0009523] ; plastoglobule[GO:0010287]	NA
TR36830|c1_g1_i3	235.467	1367.07	2.5375	0.0149301	0.644191	No	PREDICTED: pectinesterase 1-like	Sesamum indicum	NA	NA	NA	NA	NA
TR34386|c0_g5_i1	53.033	307.356	2.53495	0.0182142	0.679535	No	NA	NA	NA	NA	NA	NA	NA
TR35055|c0_g1_i1	502.753	2913.28	2.53472	0.0240548	0.734627	No	NA	NA	NA	NA	NA	NA	NA
TR35210|c0_g1_i9	188.798	1091.77	2.53176	0.0143163	0.636424	No	PREDICTED: peptidyl-prolyl cis-trans isomerase CYP26-2, chloroplastic	Sesamum indicum	NA	NA	NA	NA	NA
TR30936|c0_g2_i1	25.4558	147.078	2.53051	0.023334	0.728872	No	PREDICTED: probable serine/threonine-protein kinase At1g01540	Sesamum indicum	NA	NA	NA	NA	NA
TR33100|c0_g1_i6	118.794	686.365	2.53051	0.0143901	0.633534	No	PREDICTED: aluminum-activated malate transporter 4-like	Sesamum indicum	NA	NA	NA	NA	NA
TR24798|c0_g1_i3	536.694	3098.07	2.5292	0.0256023	0.735414	No	PREDICTED: auxin-binding protein ABP19a	Sesamum indicum	NA	NA	NA	NA	NA
TR44439|c0_g2_i3	120.915	697.679	2.52857	0.0144221	0.633583	No	PREDICTED: alpha-glucan water dikinase, chloroplastic-like	Sesamum indicum	NA	NA	NA	NA	NA
TR30156|c0_g1_i3	144.25	831.558	2.52725	0.0142392	0.636442	No	hypothetical protein MIMGU_mgv1a016615mg	Mimulus guttatus	NA	NA	NA	NA	NA
TR24521|c0_g1_i2	65.7609	379.009	2.52693	0.0172542	0.675627	No	PREDICTED: uncharacterized protein LOC105166552	Sesamum indicum	NA	NA	NA	NA	NA
TR36005|c0_g10_i6	50.9117	292.271	2.52124	0.0191873	0.688331	No	PREDICTED: glutathione S-transferase 2-like	Sesamum indicum	NA	NA	NA	NA	NA
TR8004|c0_g5_i1	42.4264	243.245	2.51937	0.0210003	0.712901	No	PREDICTED: GDSL esterase/lipase At5g33370-like	Sesamum indicum	NA	NA	NA	NA	NA
TR36909|c0_g3_i5	231.224	1325.59	2.51927	0.0154466	0.648095	No	PREDICTED: S-antigen protein-like	Sesamum indicum	NA	NA	NA	NA	NA
TR35730|c0_g1_i2	80.6102	461.976	2.51879	0.0164168	0.66437	No	PREDICTED: RING finger and CHY zinc finger domain-containing protein 1-like	Sesamum indicum	NA	NA	NA	NA	NA
TR7606|c0_g3_i1	114.551	656.195	2.51813	0.0149326	0.64362	No	NA	NA	NA	NA	NA	NA	NA
TR3925|c0_g8_i1	33.9411	194.219	2.51658	0.02287	0.722622	No	uncharacterized protein LOC100305856	Glycine max	NA	spliceosomal complex assembly[GO:0000245] ; spliceosomal snRNP assembly[GO:0000387]	RNA binding[GO:0003723]	U4 snRNP[GO:0005687] ; prespliceosome[GO:0071010] ; precatalytic spliceosome[GO:0071011] ; U2 snRNP[GO:0005686] ; spliceosomal tri-snRNP complex[GO:0097526] ; U1 snRNP[GO:0005685] ; pICln-Sm protein complex[GO:0034715] ; U5 snRNP[GO:0005682] ; commitment complex[GO:0000243] ; catalytic step 2 spliceosome[GO:0071013] ; SMN-Sm protein complex[GO:0034719] ; U12-type spliceosomal complex[GO:0005689]	NA
TR33614|c0_g2_i2	67.8823	388.437	2.51658	0.0175157	0.673036	No	PREDICTED: LOW QUALITY PROTEIN: probable WRKY transcription factor 33	Sesamum indicum	NA	NA	NA	NA	NA
TR38253|c0_g1_i2	82.7315	473.29	2.51622	0.0163788	0.663488	No	PREDICTED: probable LRR receptor-like serine/threonine-protein kinase At1g56140	Nicotiana tomentosiformis	NA	NA	NA	NA	NA
TR42149|c0_g2_i1	150.614	857.956	2.51005	0.0148322	0.642666	No	PREDICTED: G-type lectin S-receptor-like serine/threonine-protein kinase At4g27290 isoform X2	Sesamum indicum	NA	NA	NA	NA	NA
TR38595|c0_g1_i1	10.6066	60.3398	2.50815	0.0106499	0.586404	No	hypothetical protein MIMGU_mgv1a012466mg	Mimulus guttatus	NA	NA	zinc ion binding[GO:0008270]	NA	NA
TR3576|c0_g3_i2	21.2132	120.68	2.50815	0.024332	0.73598	No	PREDICTED: protein IQ-DOMAIN 1-like	Sesamum indicum	NA	NA	NA	NA	NA
TR3247|c1_g4_i2	42.4264	241.359	2.50815	0.0215788	0.713663	No	hypothetical protein MIMGU_mgv1a015249mg	Mimulus guttatus	NA	response to biotic stimulus[GO:0009607] ; defense response[GO:0006952]	NA	NA	NA
TR37879|c1_g1_i2	159.099	905.097	2.50815	0.0149051	0.643788	No	PREDICTED: phosphoinositide phospholipase C 2-like	Sesamum indicum	NA	NA	NA	NA	NA
TR36166|c0_g2_i3	27.5772	156.506	2.50467	0.0243626	0.735282	No	PREDICTED: serine/threonine-protein phosphatase PP1 isozyme 3 isoform X1	Sesamum indicum	NA	NA	NA	NA	NA
TR31880|c4_g3_i4	1898.58	10768.8	2.50386	0.0901977	0.939868	No	PREDICTED: peroxisomal membrane protein 11C	Sesamum indicum	NA	NA	NA	NA	NA
TR40384|c0_g1_i1	44.5477	252.673	2.50385	0.0213239	0.712114	No	PREDICTED: transmembrane protein 53	Sesamum indicum	NA	NA	NA	NA	NA
TR35874|c0_g1_i1	33.9411	192.333	2.5025	0.0235936	0.734191	No	PREDICTED: phosphoserine aminotransferase 2, chloroplastic	Sesamum indicum	NA	NA	NA	NA	NA
TR32802|c1_g3_i2	118.794	673.166	2.5025	0.0154314	0.648119	No	PREDICTED: LOW QUALITY PROTEIN: 4-coumarate--CoA ligase 1-like	Sesamum indicum	NA	NA	NA	NA	NA
TR31131|c0_g1_i9	186.676	1057.83	2.5025	0.015298	0.647816	No	PREDICTED: uncharacterized protein LOC105161139	Sesamum indicum	NA	NA	NA	NA	NA
TR40656|c0_g4_i3	57.2756	324.326	2.50145	0.0191976	0.688097	No	PREDICTED: uncharacterized protein LOC101258883	Solanum lycopersicum	NA	NA	NA	integral component of membrane[GO:0016021]	NA
TR17685|c0_g1_i1	23.3345	131.993	2.49993	0.0250024	0.737257	No	PREDICTED: NADH dehydrogenase [ubiquinone] iron-sulfur protein 7, mitochondrial	Sesamum indicum	NA	NA	NA	NA	NA
TR8143|c4_g3_i1	23.3345	131.993	2.49993	0.0250024	0.736728	No	NA	NA	NA	NA	NA	NA	NA
TR41130|c1_g3_i3	29.6985	167.82	2.49845	0.0243553	0.735603	No	PREDICTED: cytochrome P450 704C1-like	Sesamum indicum	NA	NA	NA	NA	NA
TR30451|c0_g2_i6	154.856	874.927	2.49823	0.0152595	0.64752	No	NA	NA	NA	NA	NA	NA	NA
TR33460|c0_g5_i5	375.474	2121.32	2.49818	0.0205961	0.708548	No	NA	NA	NA	NA	NA	NA	NA
TR32928|c0_g3_i1	36.0624	203.647	2.4975	0.0235187	0.732968	No	PREDICTED: probable plastid-lipid-associated protein 6, chloroplastic	Sesamum indicum	NA	NA	NA	NA	NA
TR41216|c1_g1_i3	42.4264	239.473	2.49683	0.0221753	0.718354	No	hypothetical protein JCGZ_23182	Jatropha curcas	NA	protein phosphorylation[GO:0006468]	protein kinase activity[GO:0004672] ; ATP binding[GO:0005524]	NA	NA
TR37377|c0_g2_i4	110.309	622.254	2.49596	0.0158976	0.654974	No	unnamed protein product	Vitis vinifera	NA	NA	NA	NA	NA
TR44244|c0_g1_i6	256.68	1446.27	2.49429	0.0169056	0.670282	No	NA	NA	NA	NA	NA	NA	NA
TR27122|c0_g2_i4	12.7279	71.6535	2.49304	0.0156859	0.650165	No	unnamed protein product	Vitis vinifera	NA	negative regulation of defense response[GO:0031348] ; protein folding[GO:0006457] ; response to high light intensity[GO:0009644] ; ER-nucleus signaling pathway[GO:0006984] ; response to endoplasmic reticulum stress[GO:0034976] ; response to hydrogen peroxide[GO:0042542] ; response to heat[GO:0009408]	NA	integral component of membrane[GO:0016021]	NA
TR32842|c1_g1_i1	12.7279	71.6535	2.49304	0.0156859	0.64951	No	hypothetical protein PRUPE_ppa013836mg	Prunus persica	NA	photorespiration[GO:0009853]	NA	integral component of membrane[GO:0016021]	NA
TR36033|c1_g1_i1	12.7279	71.6535	2.49304	0.0156859	0.650822	No	PREDICTED: 3-ketoacyl-CoA synthase 10	Nicotiana tomentosiformis	NA	NA	NA	NA	NA
TR41683|c1_g1_i1	31.8198	179.134	2.49304	0.0243353	0.735539	No	4-coumarate: CoA ligase	Scutellaria baicalensis	Lamiaceae	metabolic process[GO:0008152]	ligase activity[GO:0016874]	NA	NA
TR41459|c0_g3_i1	63.6396	358.267	2.49304	0.018957	0.685454	No	hypothetical protein MIMGU_mgv1a004060mg	Mimulus guttatus	NA	lignin catabolic process[GO:0046274] ; oxidation-reduction process[GO:0055114]	copper ion binding[GO:0005507] ; hydroquinone:oxygen oxidoreductase activity[GO:0052716]	apoplast[GO:0048046]	NA
TR42285|c0_g8_i5	207.889	1169.08	2.49149	0.0159852	0.656609	No	Ketol-acid reductoisomerase	Morus notabilis	NA	branched-chain amino acid biosynthetic process[GO:0009082] ; oxidation-reduction process[GO:0055114]	ketol-acid reductoisomerase activity[GO:0004455] ; isomerase activity[GO:0016853]	integral component of membrane[GO:0016021]	map00290:Valine, leucine and isoleucine biosynthesis(reductoisomerase (NADP+)[ec:1.1.1.86]) ; map01130:Biosynthesis of antibiotics(reductoisomerase (NADP+)[ec:1.1.1.86]) ; map00770:Pantothenate and CoA biosynthesis(reductoisomerase (NADP+)[ec:1.1.1.86])
TR43175|c1_g3_i5	466.69	2622.89	2.49062	0.0244032	0.735966	No	hypothetical protein MIMGU_mgv1a003222mg	Mimulus guttatus	NA	methylation[GO:0032259]	methyltransferase activity[GO:0008168]	integral component of membrane[GO:0016021]	NA
TR37000|c0_g3_i5	53.033	297.928	2.49	0.0203594	0.706319	No	NA	NA	NA	NA	NA	NA	NA
TR7606|c0_g2_i1	1272.79	7138.95	2.48772	0.0610407	0.865784	No	hypothetical protein MIMGU_mgv1a015066mg	Mimulus guttatus	NA	NA	NA	integral component of membrane[GO:0016021]	NA
TR31969|c2_g6_i4	27.5772	154.621	2.48719	0.0253004	0.737048	No	PREDICTED: abscisic acid receptor PYR1	Populus euphratica	NA	NA	NA	NA	NA
TR40215|c0_g14_i1	21.2132	118.794	2.48543	0.0254078	0.737564	No	PREDICTED: probable polygalacturonase	Sesamum indicum	NA	NA	NA	NA	NA
TR39026|c0_g1_i6	171.827	961.665	2.48458	0.0158215	0.653148	No	PREDICTED: uncharacterized protein LOC105174419	Sesamum indicum	NA	NA	NA	NA	NA
TR3571|c1_g1_i2	116.673	652.424	2.48334	0.0162333	0.661508	No	PREDICTED: chitinase 6-like	Eucalyptus grandis	NA	organic substance metabolic process[GO:0071704]	NA	NA	NA
TR44246|c1_g5_i1	65.7609	367.696	2.48321	0.0192188	0.685865	No	PREDICTED: elongation factor G, chloroplastic-like, partial	Vitis vinifera	NA	NA	NA	NA	NA
TR31731|c1_g3_i2	14.8492	82.9672	2.48215	0.0196862	0.6947	No	NA	NA	NA	NA	NA	NA	NA
TR2534|c0_g2_i1	14.8492	82.9672	2.48215	0.0196862	0.695297	No	NA	NA	NA	NA	NA	NA	NA
TR30441|c0_g1_i3	165.463	922.067	2.47836	0.0160243	0.656246	No	copper/zinc superoxide dismutase 3 family protein	Populus trichocarpa	NA	removal of superoxide radicals[GO:0019430] ; oxidation-reduction process[GO:0055114]	copper ion binding[GO:0005507] ; superoxide dismutase activity[GO:0004784] ; zinc ion binding[GO:0008270]	cytoplasm[GO:0005737] ; extracellular space[GO:0005615]	NA
TR40699|c1_g2_i1	33.9411	188.562	2.47393	0.0251171	0.737461	No	PREDICTED: tubby-like F-box protein 3	Sesamum indicum	NA	NA	NA	NA	NA
TR41577|c0_g2_i2	50.9117	282.843	2.47393	0.0215668	0.714994	No	hypothetical protein MIMGU_mgv1a001844mg	Mimulus guttatus	NA	proteolysis[GO:0006508]	metalloendopeptidase activity[GO:0004222] ; ATP binding[GO:0005524]	NA	NA
TR40443|c0_g1_i1	59.397	329.983	2.47393	0.0202772	0.705256	No	PREDICTED: probable serine/threonine-protein kinase At1g01540	Sesamum indicum	NA	NA	NA	NA	NA
TR32345|c1_g1_i4	27.5772	152.735	2.46949	0.026281	0.736871	No	PREDICTED: translation machinery-associated protein 22 isoform X1	Sesamum indicum	NA	NA	NA	NA	NA
TR39534|c4_g1_i1	1552.81	8596.53	2.46888	0.0758601	0.909259	No	PREDICTED: pleiotropic drug resistance protein 2-like	Sesamum indicum	NA	NA	NA	NA	NA
TR38753|c0_g5_i3	84.8528	469.519	2.46815	0.0183335	0.680891	No	NA	NA	NA	NA	NA	NA	NA
TR2439|c0_g1_i1	19.0919	105.595	2.4675	0.0251105	0.737795	No	PREDICTED: probable 6-phosphogluconolactonase 2-like	Solanum tuberosum	NA	carbohydrate metabolic process[GO:0005975] ; pentose-phosphate shunt[GO:0006098]	6-phosphogluconolactonase activity[GO:0017057]	NA	map00030:Pentose phosphate pathway(phosphogluconolactonase[ec:3.1.1.31]) ; map01130:Biosynthesis of antibiotics(phosphogluconolactonase[ec:3.1.1.31])
TR39997|c3_g4_i9	19.0919	105.595	2.4675	0.0251105	0.738323	No	PREDICTED: cytochrome P450 76A1	Erythranthe guttatus	NA	NA	NA	NA	NA
TR20669|c0_g1_i1	57.2756	316.784	2.4675	0.0208598	0.711657	No	PREDICTED: coatomer subunit zeta-1-like	Sesamum indicum	NA	NA	NA	NA	NA
TR41184|c0_g5_i6	97.5807	539.287	2.46638	0.0176418	0.675355	No	PREDICTED: CDPK-related kinase 1-like	Sesamum indicum	NA	NA	NA	NA	NA
TR42543|c1_g1_i6	29.6985	164.049	2.46566	0.0261567	0.736402	No	SEU3B protein	Antirrhinum majus	NA	NA	NA	NA	NA
TR37092|c5_g3_i1	997.021	5504.12	2.46482	0.048858	0.824863	No	predicted protein	Hordeum vulgare subsp. vulgare	NA	microtubule-based process[GO:0007017] ; metabolic process[GO:0008152]	structural constituent of cytoskeleton[GO:0005200] ; GTP binding[GO:0005525] ; GTPase activity[GO:0003924]	microtubule[GO:0005874]	NA
TR38914|c0_g1_i1	10.6066	58.4542	2.46234	0.0111425	0.590569	No	NA	NA	NA	NA	NA	NA	NA
TR41498|c0_g10_i1	10.6066	58.4542	2.46234	0.0111425	0.591332	No	NA	NA	NA	NA	NA	NA	NA
TR2911|c0_g3_i1	74.2462	409.179	2.46234	0.019445	0.690339	No	PREDICTED: xylem cysteine proteinase 1-like	Solanum tuberosum	NA	proteolysis[GO:0006508]	cysteine-type peptidase activity[GO:0008234]	NA	NA
TR42780|c0_g3_i1	57.2756	314.898	2.45889	0.0213027	0.713144	No	PREDICTED: pyruvate dehydrogenase E1 component subunit alpha-3, chloroplastic-like	Vigna radiata var. radiata	NA	NA	NA	NA	NA
TR38699|c2_g3_i1	23.3345	128.222	2.45811	0.0271941	0.742702	No	PREDICTED: uncharacterized protein LOC105961476 isoform X2	Erythranthe guttatus	NA	NA	NA	NA	NA
TR31309|c0_g1_i1	207.889	1140.8	2.45616	0.0173181	0.673633	No	hypothetical protein MIMGU_mgv1a024078mg	Mimulus guttatus	NA	NA	NA	NA	NA
TR30186|c1_g1_i1	86.9741	477.061	2.45552	0.0187723	0.683592	No	PREDICTED: phosphoglycerate kinase, cytosolic-like	Sesamum indicum	NA	NA	NA	NA	NA
TR31912|c1_g9_i2	1056.42	5794.5	2.45551	0.0522292	0.835423	No	PREDICTED: ATP synthase subunit b', chloroplastic	Sesamum indicum	NA	NA	NA	NA	NA
TR39082|c2_g3_i6	1013.99	5558.8	2.45473	0.0502324	0.827656	No	PREDICTED: uncharacterized protein LOC105156326	Sesamum indicum	NA	NA	NA	NA	NA
TR33586|c0_g1_i8	12.7279	69.7679	2.45457	0.0164945	0.666204	No	hypothetical protein MIMGU_mgv1a009481mg	Mimulus guttatus	NA	metabolic process[GO:0008152]	hydrolase activity[GO:0016787]	NA	NA
TR34515|c1_g2_i1	12.7279	69.7679	2.45457	0.0164945	0.664245	No	NA	NA	NA	NA	NA	NA	NA
TR38628|c0_g5_i7	12.7279	69.7679	2.45457	0.0164945	0.66555	No	PREDICTED: RPM1-interacting protein 4-like	Sesamum indicum	NA	NA	NA	NA	NA
TR43123|c0_g1_i1	12.7279	69.7679	2.45457	0.0164945	0.664897	No	PREDICTED: peptidyl-prolyl cis-trans isomerase FKBP62-like	Nicotiana sylvestris	NA	NA	NA	NA	NA
TR44169|c1_g1_i1	25.4558	139.536	2.45457	0.0273805	0.743344	No	PREDICTED: protein IQ-DOMAIN 32-like	Sesamum indicum	NA	NA	NA	NA	NA
TR38459|c0_g2_i1	248.194	1359.53	2.45357	0.0182311	0.679545	No	PREDICTED: uncharacterized protein LOC105165277 isoform X2	Sesamum indicum	NA	NA	NA	NA	NA
TR38803|c0_g6_i6	78.4889	429.921	2.45351	0.0195117	0.692108	No	cytochrome P450 CYP76A35	Salvia miltiorrhiza	NA	oxidation-reduction process[GO:0055114]	heme binding[GO:0020037] ; oxidoreductase activity, acting on paired donors, with incorporation or reduction of molecular oxygen[GO:0016705] ; monooxygenase activity[GO:0004497] ; iron ion binding[GO:0005506]	integral component of membrane[GO:0016021]	NA
TR7979|c0_g2_i2	165.463	905.097	2.45156	0.0170781	0.67001	No	PREDICTED: peptidyl-prolyl cis-trans isomerase FKBP62-like	Sesamum indicum	NA	NA	NA	NA	NA
TR42759|c0_g2_i1	42.4264	231.931	2.45066	0.0247553	0.734716	No	PREDICTED: protein ETHYLENE INSENSITIVE 3-like	Sesamum indicum	NA	NA	NA	NA	NA
TR34481|c1_g3_i1	59.397	324.326	2.44898	0.0215413	0.714726	No	PREDICTED: uncharacterized protein LOC105170479	Sesamum indicum	NA	NA	NA	NA	NA
TR7940|c2_g1_i9	133.643	729.734	2.44898	0.0173345	0.672996	No	PREDICTED: uncharacterized protein LOC105170122	Sesamum indicum	NA	NA	NA	NA	NA
TR7663|c0_g1_i1	48.7904	265.872	2.44606	0.0235376	0.733001	No	NA	NA	NA	NA	NA	NA	NA
TR30635|c0_g1_i2	131.522	716.535	2.44573	0.0175038	0.673206	No	PREDICTED: LOW QUALITY PROTEIN: benzyl alcohol O-benzoyltransferase-like	Sesamum indicum	NA	NA	NA	NA	NA
TR25142|c0_g1_i4	103.945	565.685	2.44418	0.0183379	0.680442	No	NA	NA	NA	NA	NA	NA	NA
TR8007|c0_g2_i3	330.926	1800.77	2.44403	0.0210797	0.712651	No	cytochrome P450 CYP716A89	Salvia miltiorrhiza	NA	oxidation-reduction process[GO:0055114]	heme binding[GO:0020037] ; oxidoreductase activity, acting on paired donors, with incorporation or reduction of molecular oxygen[GO:0016705] ; monooxygenase activity[GO:0004497] ; iron ion binding[GO:0005506]	integral component of membrane[GO:0016021]	NA
TR40184|c0_g1_i1	123.037	669.394	2.44377	0.0177471	0.678751	No	PREDICTED: probable starch synthase 4, chloroplastic/amyloplastic isoform X1	Sesamum indicum	NA	NA	NA	NA	NA
TR30689|c0_g2_i2	89.0955	484.604	2.44338	0.0192033	0.687701	No	PREDICTED: zinc finger A20 and AN1 domain-containing stress-associated protein 5-like	Sesamum indicum	NA	NA	NA	NA	NA
TR42356|c1_g8_i1	36.0624	196.104	2.44305	0.026567	0.741349	No	PREDICTED: omega-amidase,chloroplastic-like	Erythranthe guttatus	NA	NA	NA	NA	NA
TR3531|c0_g1_i1	6075.46	33032.3	2.44281	0.276314	1.09873	No	PREDICTED: low-temperature-induced cysteine proteinase-like	Sesamum indicum	NA	NA	NA	NA	NA
TR38508|c0_g1_i7	110.309	599.627	2.44252	0.0181603	0.679373	No	PREDICTED: potassium channel SKOR-like	Sesamum indicum	NA	NA	NA	NA	NA
TR39050|c0_g2_i1	59.397	322.441	2.44057	0.0219843	0.717828	No	PREDICTED: uncharacterized protein LOC105176091	Sesamum indicum	NA	NA	NA	NA	NA
TR41005|c1_g1_i2	284.257	1542.44	2.43994	0.0197401	0.695408	No	PREDICTED: beta-galactosidase-like	Sesamum indicum	NA	NA	NA	NA	NA
TR40760|c0_g1_i2	1120.06	6071.69	2.43853	0.0563279	0.851573	No	PREDICTED: probable leucine-rich repeat receptor-like protein kinase At5g49770 isoform X2	Sesamum indicum	NA	NA	NA	NA	NA
TR38224|c0_g5_i1	44.5477	241.359	2.43776	0.0250068	0.73633	No	hypothetical protein MIMGU_mgv1a005922mg	Mimulus guttatus	NA	NA	NA	NA	NA
TR32640|c0_g5_i4	23.3345	126.336	2.43673	0.0283694	0.752293	No	PREDICTED: CASP-like protein 4A3	Sesamum indicum	NA	NA	NA	NA	NA
TR27951|c0_g1_i1	46.669	252.673	2.43673	0.024562	0.732156	No	NA	NA	NA	NA	NA	NA	NA
TR37465|c0_g1_i1	333.047	1802.65	2.43632	0.0214729	0.714766	No	hypothetical protein MIMGU_mgv1a003993mg	Mimulus guttatus	NA	metabolic process[GO:0008152]	catalytic activity[GO:0003824]	NA	NA
TR36809|c0_g1_i3	25.4558	137.65	2.43494	0.0285139	0.75224	No	PREDICTED: acyl-coenzyme A thioesterase 9, mitochondrial-like isoform X2	Sesamum indicum	NA	NA	NA	NA	NA
TR37029|c1_g1_i1	50.9117	275.3	2.43494	0.023724	0.733802	No	PREDICTED: nicotinate-nucleotide pyrophosphorylase [carboxylating], chloroplastic	Sesamum indicum	NA	NA	NA	NA	NA
TR36489|c0_g1_i4	127.279	688.251	2.43494	0.0180471	0.676988	No	cytochrome P450 CYP81Q43	Salvia miltiorrhiza	NA	oxidation-reduction process[GO:0055114]	heme binding[GO:0020037] ; oxidoreductase activity, acting on paired donors, with incorporation or reduction of molecular oxygen[GO:0016705] ; monooxygenase activity[GO:0004497] ; iron ion binding[GO:0005506]	NA	NA
TR32865|c1_g1_i1	29.6985	160.278	2.43211	0.0281217	0.752525	No	NA	NA	NA	NA	NA	NA	NA
TR33825|c0_g1_i3	33.9411	182.905	2.42999	0.0276142	0.745257	No	hypothetical protein MIMGU_mgv1a009284mg	Mimulus guttatus	NA	NA	NA	membrane[GO:0016020]	NA
TR35063|c1_g6_i1	36.0624	194.219	2.42911	0.0273953	0.742764	No	NA	NA	NA	NA	NA	NA	NA
TR33259|c0_g1_i6	220.617	1187.94	2.42884	0.0186417	0.683073	No	hypothetical protein MIMGU_mgv1a021873mg	Mimulus guttatus	NA	biosynthetic process[GO:0009058]	strictosidine synthase activity[GO:0016844]	NA	map00901:Indole alkaloid biosynthesis(synthase[ec:4.3.3.2])
TR35731|c3_g1_i1	112.43	605.283	2.42858	0.0187225	0.682989	No	s-adenosylmethionine synthase 1, partial	Genlisea aurea	NA	S-adenosylmethionine biosynthetic process[GO:0006556]	methionine adenosyltransferase activity[GO:0004478] ; ATP binding[GO:0005524]	NA	map00270:Cysteine and methionine metabolism(adenosyltransferase[ec:2.5.1.6])
TR38972|c1_g7_i3	112.43	605.283	2.42858	0.0187225	0.682383	No	PREDICTED: uncharacterized protein LOC105172351	Sesamum indicum	NA	NA	NA	NA	NA
TR39050|c0_g1_i5	152.735	820.244	2.42502	0.0181992	0.680208	No	NA	NA	NA	NA	NA	NA	NA
TR3481|c1_g1_i3	142.128	761.79	2.4222	0.0183965	0.680769	No	PREDICTED: zinc finger A20 and AN1 domain-containing stress-associated protein 8-like	Sesamum indicum	NA	NA	NA	NA	NA
TR8283|c1_g1_i2	72.1249	386.552	2.42209	0.0216695	0.712648	No	PREDICTED: GPI ethanolamine phosphate transferase 3 isoform X1	Erythranthe guttatus	NA	NA	NA	NA	NA
TR3786|c0_g1_i5	108.187	578.885	2.41974	0.0192981	0.686906	No	PREDICTED: nucleolin 1-like	Sesamum indicum	NA	NA	NA	NA	NA
TR41157|c0_g5_i1	12.7279	67.8823	2.41504	0.0173576	0.671358	No	PREDICTED: glycerol-3-phosphate dehydrogenase SDP6, mitochondrial isoform X1	Nicotiana tomentosiformis	NA	NA	NA	NA	NA
TR41250|c0_g3_i3	14.8492	79.196	2.41504	0.0217497	0.714713	No	NA	NA	NA	NA	NA	NA	NA
TR34807|c0_g1_i1	16.9706	90.5097	2.41504	0.0249916	0.737468	No	NA	NA	NA	NA	NA	NA	NA
TR39311|c0_g3_i1	16.9706	90.5097	2.41504	0.0249916	0.737998	No	PREDICTED: leucine-rich repeat receptor-like serine/threonine/tyrosine-protein kinase SOBIR1	Sesamum indicum	NA	NA	NA	NA	NA
TR42097|c1_g3_i1	25.4558	135.765	2.41504	0.029701	0.760598	No	Uncharacterized protein isoform 1	Theobroma cacao	NA	protein autophosphorylation[GO:0046777] ; response to blue light[GO:0009637] ; regulation of proton transport[GO:0010155] ; cellular cation homeostasis[GO:0030003] ; divalent metal ion transport[GO:0070838]	NA	chloroplast thylakoid membrane[GO:0009535]	NA
TR40298|c1_g3_i3	27.5772	147.078	2.41504	0.0295015	0.763102	No	NA	NA	NA	NA	NA	NA	NA
TR36643|c1_g5_i8	29.6985	158.392	2.41504	0.0291705	0.758359	No	PREDICTED: GDSL esterase/lipase At4g10955-like	Sesamum indicum	NA	NA	NA	NA	NA
TR32168|c0_g3_i2	40.3051	214.96	2.41504	0.0274166	0.742363	No	phosphate-responsive 1 family protein	Populus trichocarpa	NA	NA	NA	NA	NA
TR39820|c0_g1_i1	46.669	248.902	2.41504	0.0258729	0.733439	No	AT1G78900	Arabidopsis thaliana	NA	NA	NA	NA	NA
TR35036|c1_g5_i1	48.7904	260.215	2.41504	0.0253714	0.737547	No	hypothetical protein MIMGU_mgv1a004814mg	Mimulus guttatus	NA	NA	NA	NA	NA
TR34818|c0_g1_i6	53.033	282.843	2.41504	0.0244573	0.735437	No	PREDICTED: triphosphate tunel metalloenzyme 3-like	Erythranthe guttatus	NA	NA	NA	NA	NA
TR8037|c0_g1_i1	89.0955	475.176	2.41504	0.0206064	0.708309	No	PREDICTED: protein ASPARTIC PROTEASE IN GUARD CELL 2-like	Sesamum indicum	NA	NA	NA	NA	NA
TR25272|c0_g1_i1	150.614	803.273	2.41504	0.0186502	0.682778	No	NA	NA	NA	NA	NA	NA	NA
TR32982|c0_g2_i2	182.434	972.979	2.41504	0.0187056	0.682979	No	PREDICTED: uncharacterized protein LOC105174078	Sesamum indicum	NA	NA	NA	NA	NA
TR35024|c0_g8_i3	86.9741	461.976	2.40916	0.0210666	0.713971	No	PREDICTED: superoxide dismutase [Cu-Zn], chloroplastic	Phoenix dactylifera	NA	NA	NA	NA	NA
TR22995|c0_g1_i2	65.7609	348.839	2.40726	0.023099	0.724839	No	conserved hypothetical protein	Ricinus communis	NA	NA	NA	NA	NA
TR29865|c0_g4_i1	57.2756	303.585	2.4061	0.0242152	0.735697	No	PREDICTED: shaggy-related protein kinase alpha	Sesamum indicum	NA	NA	NA	NA	NA
TR3452|c0_g1_i1	55.1543	292.271	2.40576	0.0246033	0.731793	No	PREDICTED: inositol-tetrakisphosphate 1-kinase 2 isoform X1	Sesamum indicum	NA	NA	NA	NA	NA
TR2426|c1_g1_i2	48.7904	258.33	2.40455	0.026019	0.735045	No	PREDICTED: pto-interacting protein 1 isoform X1	Sesamum indicum	NA	NA	NA	NA	NA
TR37794|c1_g2_i8	48.7904	258.33	2.40455	0.026019	0.73555	No	PREDICTED: pollen-specific leucine-rich repeat extensin-like protein 1	Erythranthe guttatus	NA	NA	NA	NA	NA
TR40900|c0_g5_i1	140.007	741.048	2.40407	0.0192448	0.686197	No	PREDICTED: protein NRT1/ PTR FAMILY 3.1-like	Sesamum indicum	NA	NA	NA	NA	NA
TR42149|c0_g2_i5	156.978	829.672	2.40198	0.019214	0.686292	No	PREDICTED: G-type lectin S-receptor-like serine/threonine-protein kinase At4g27290	Erythranthe guttatus	NA	NA	NA	NA	NA
TR43224|c1_g3_i2	38.1838	201.761	2.40162	0.0287231	0.753884	No	PREDICTED: acetolactate synthase 1, chloroplastic	Sesamum indicum	NA	NA	NA	NA	NA
TR31373|c0_g3_i3	74.2462	392.209	2.40123	0.022591	0.719898	No	hypothetical protein MIMGU_mgv1a015050mg	Mimulus guttatus	NA	NA	NA	NA	NA
TR44666|c1_g1_i3	74.2462	392.209	2.40123	0.022591	0.71934	No	PREDICTED: protein NLP9	Sesamum indicum	NA	NA	NA	NA	NA
TR35195|c0_g4_i3	36.0624	190.447	2.40082	0.0291382	0.757998	No	PREDICTED: uncharacterized protein LOC105967110	Erythranthe guttatus	NA	NA	NA	NA	NA
TR36884|c0_g1_i1	70.0036	369.581	2.40039	0.0230529	0.724498	No	PREDICTED: U-box domain-containing protein 26-like	Sesamum indicum	NA	NA	NA	NA	NA
TR3643|c0_g2_i4	67.8823	358.267	2.39993	0.0232918	0.728662	No	PREDICTED: uncharacterized protein LOC105977107	Erythranthe guttatus	NA	NA	NA	NA	NA
TR32222|c1_g1_i1	29.6985	156.506	2.39776	0.0302664	0.762714	No	PREDICTED: cell division topological specificity factor homolog, chloroplastic-like	Sesamum indicum	NA	NA	NA	NA	NA
TR44813|c4_g5_i2	29.6985	156.506	2.39776	0.0302664	0.762246	No	hypothetical protein MIMGU_mgv1a0176472mg, partial	Mimulus guttatus	NA	NA	NA	NA	NA
TR36212|c1_g2_i1	27.5772	145.193	2.39642	0.0306758	0.763659	No	NA	NA	NA	NA	NA	NA	NA
TR7782|c0_g4_i1	27.5772	145.193	2.39642	0.0306758	0.763197	No	PREDICTED: protein TIC 22, chloroplastic	Sesamum indicum	NA	NA	NA	NA	NA
TR7914|c1_g1_i1	27.5772	145.193	2.39642	0.0306758	0.762735	No	NA	NA	NA	NA	NA	NA	NA
TR34529|c0_g3_i3	25.4558	133.879	2.39486	0.0309445	0.76341	No	PREDICTED: FAM10 family protein At4g22670	Sesamum indicum	NA	NA	NA	NA	NA
TR34950|c0_g1_i1	48.7904	256.444	2.39398	0.0266857	0.743651	No	hypothetical protein MIMGU_mgv1a008657mg	Mimulus guttatus	NA	NA	NA	NA	NA
TR36059|c0_g1_i5	67.8823	356.382	2.39232	0.0237207	0.734251	No	PREDICTED: uncharacterized protein LOC105173315	Sesamum indicum	NA	NA	NA	NA	NA
TR29522|c0_g1_i1	269.408	1412.33	2.39021	0.0214533	0.714691	No	PREDICTED: beta-hexosaminidase 3	Sesamum indicum	NA	NA	NA	NA	NA
TR32910|c0_g1_i1	659.731	3458.22	2.39008	0.0374208	0.789064	No	cytochrome P450 CYP89A115	Salvia miltiorrhiza	NA	oxidation-reduction process[GO:0055114]	heme binding[GO:0020037] ; oxidoreductase activity, acting on paired donors, with incorporation or reduction of molecular oxygen[GO:0016705] ; monooxygenase activity[GO:0004497] ; iron ion binding[GO:0005506]	NA	NA
TR43449|c1_g3_i3	99.7021	522.316	2.38923	0.0212498	0.714871	No	PREDICTED: EIN3-binding F-box protein 1-like	Sesamum indicum	NA	NA	NA	NA	NA
TR36535|c0_g2_i7	38.1838	199.876	2.38807	0.0295992	0.762746	No	PREDICTED: uncharacterized protein LOC105159385	Sesamum indicum	NA	NA	NA	NA	NA
TR37836|c2_g1_i4	93.3381	488.375	2.38745	0.0217513	0.714193	No	hypothetical protein MIMGU_mgv1a006029mg	Mimulus guttatus	NA	NA	NA	NA	NA
TR23898|c0_g1_i3	36.0624	188.562	2.38647	0.030055	0.762531	No	PREDICTED: two-component response regulator-like APRR3	Sesamum indicum	NA	NA	NA	NA	NA
TR2701|c2_g1_i1	1081.87	5656.85	2.38647	0.0576681	0.850547	No	PREDICTED: uncharacterized protein LOC105177873	Sesamum indicum	NA	NA	NA	NA	NA
TR34379|c0_g2_i1	214.253	1120.06	2.38618	0.0203925	0.706872	No	NA	NA	NA	NA	NA	NA	NA
TR24521|c0_g1_i1	16.9706	88.624	2.38466	0.0262215	0.736713	No	PREDICTED: uncharacterized protein LOC105166552	Sesamum indicum	NA	NA	NA	NA	NA
TR39093|c0_g5_i3	16.9706	88.624	2.38466	0.0262215	0.735707	No	PREDICTED: crocetin glucosyltransferase, chloroplastic-like	Sesamum indicum	NA	NA	NA	NA	NA
TR39846|c0_g4_i1	16.9706	88.624	2.38466	0.0262215	0.73621	No	PREDICTED: vestitone reductase-like	Erythranthe guttatus	NA	NA	NA	NA	NA
TR34235|c0_g3_i4	229.103	1195.48	2.38353	0.0207883	0.7104	No	NA	NA	NA	NA	NA	NA	NA
TR33250|c0_g1_i1	14.8492	77.3103	2.38027	0.0228876	0.722621	No	PREDICTED: NADPH-dependent 1-acyldihydroxyacetone phosphate reductase-like	Sesamum indicum	NA	NA	NA	NA	NA
TR38702|c0_g1_i1	14.8492	77.3103	2.38027	0.0228876	0.722066	No	transcription factor MYC2	Salvia miltiorrhiza	NA	NA	NA	NA	NA
TR35372|c0_g1_i5	29.6985	154.621	2.38027	0.0314117	0.768474	No	hypothetical protein MIMGU_mgv1a009964mg	Mimulus guttatus	NA	formation of translation preinitiation complex[GO:0001731] ; regulation of translational initiation[GO:0006446]	translation initiation factor activity[GO:0003743]	eukaryotic 43S preinitiation complex[GO:0016282] ; eukaryotic translation initiation factor 3 complex[GO:0005852] ; eukaryotic 48S preinitiation complex[GO:0033290]	NA
TR33027|c0_g2_i2	59.397	309.241	2.38027	0.025421	0.736385	No	NA	NA	NA	NA	NA	NA	NA
TR35743|c2_g1_i2	59.397	309.241	2.38027	0.025421	0.736905	No	PREDICTED: uncharacterized protein LOC105169314	Sesamum indicum	NA	NA	NA	NA	NA
TR37674|c0_g3_i1	89.0955	463.862	2.38027	0.0224529	0.719966	No	cytochrome P450 monooxygenase	Sesamum indicum	NA	oxidation-reduction process[GO:0055114]	heme binding[GO:0020037] ; oxidoreductase activity, acting on paired donors, with incorporation or reduction of molecular oxygen[GO:0016705] ; monooxygenase activity[GO:0004497] ; iron ion binding[GO:0005506]	NA	NA
TR2497|c0_g3_i3	515.481	2681.35	2.37897	0.0316125	0.765183	No	lipid transfer protein 2	Salvia miltiorrhiza	NA	lipid transport[GO:0006869]	lipid binding[GO:0008289]	NA	NA
TR42225|c1_g1_i2	97.5807	507.231	2.37798	0.0219794	0.71824	No	PREDICTED: cellulose synthase-like protein G3	Sesamum indicum	NA	NA	NA	NA	NA
TR2981|c0_g3_i2	235.467	1223.77	2.37773	0.0211884	0.715146	No	hypothetical protein MIMGU_mgv1a013474mg	Mimulus guttatus	NA	NA	NA	NA	NA
TR37730|c3_g2_i1	12.7279	65.9966	2.3744	0.0182804	0.680768	No	PREDICTED: cysteine and histidine-rich domain-containing protein RAR1-like	Sesamum indicum	NA	NA	NA	NA	NA
TR35106|c0_g3_i1	25.4558	131.993	2.3744	0.0322473	0.766988	No	PREDICTED: protein YLS9	Sesamum indicum	NA	NA	NA	NA	NA
TR42060|c0_g2_i3	25.4558	131.993	2.3744	0.0322473	0.766544	No	hypothetical protein MIMGU_mgv1a004277mg	Mimulus guttatus	NA	metabolic process[GO:0008152]	metal ion binding[GO:0046872] ; ATP binding[GO:0005524] ; biotin carboxylase activity[GO:0004075]	NA	NA
TR37543|c0_g1_i5	38.1838	197.99	2.3744	0.030505	0.760791	No	PREDICTED: chaperone protein dnaJ 6 isoform X2	Sesamum indicum	NA	NA	NA	NA	NA
TR41021|c0_g1_i5	76.3675	395.98	2.3744	0.0238999	0.733715	No	NA	NA	NA	NA	NA	NA	NA
TR41674|c0_g2_i2	140.007	725.963	2.3744	0.0206717	0.709958	No	plastidic ATP/ADP-transporter	Solanum tuberosum	NA	ATP transport[GO:0015867] ; ADP transport[GO:0015866]	ATP:ADP antiporter activity[GO:0005471] ; ATP binding[GO:0005524]	integral component of membrane[GO:0016021] ; chloroplast membrane[GO:0031969]	NA
TR30039|c0_g2_i1	1559.17	8083.64	2.37423	0.082645	0.924994	No	PREDICTED: photosystem I reaction center subunit II, chloroplastic-like	Sesamum indicum	NA	NA	NA	NA	NA
TR40187|c1_g3_i3	74.2462	384.666	2.37322	0.0241768	0.735075	No	PREDICTED: uncharacterized WD repeat-containing protein C2A9.03-like	Sesamum indicum	NA	NA	NA	NA	NA
TR42227|c1_g2_i1	118.794	614.711	2.37145	0.0213103	0.712819	No	PREDICTED: telomere repeat-binding protein 5	Sesamum indicum	NA	NA	NA	NA	NA
TR14694|c0_g1_i1	23.3345	120.68	2.37064	0.0322469	0.767423	No	PREDICTED: pre-mRNA-processing-splicing factor 8-like	Camelina sativa	NA	NA	NA	NA	NA
TR28172|c0_g1_i3	814.587	4208.7	2.36923	0.0457977	0.815779	No	PREDICTED: photosystem II 5 kDa protein, chloroplastic	Sesamum indicum	NA	NA	NA	NA	NA
TR25502|c0_g3_i1	212.132	1095.54	2.36861	0.0211789	0.715414	No	conserved hypothetical protein	Ricinus communis	NA	NA	NA	NA	NA
TR3729|c0_g2_i2	55.1543	284.728	2.36804	0.0269444	0.742798	No	hypothetical protein MIMGU_mgv1a014411mg	Mimulus guttatus	NA	translation[GO:0006412]	structural constituent of ribosome[GO:0003735]	ribosome[GO:0005840]	NA
TR36341|c1_g2_i6	110.309	569.457	2.36804	0.0218199	0.714733	No	PREDICTED: protein NRT1/ PTR FAMILY 3.1 isoform X2	Sesamum indicum	NA	NA	NA	NA	NA
TR8143|c4_g1_i1	76.3675	394.094	2.36751	0.0243012	0.737221	No	PREDICTED: transcription factor JUNGBRUNNEN 1	Sesamum indicum	NA	NA	NA	NA	NA
TR41648|c2_g3_i1	21.2132	109.366	2.36613	0.0316161	0.76482	No	PREDICTED: uncharacterized protein LOC105170752	Sesamum indicum	NA	NA	NA	NA	NA
TR43613|c1_g3_i1	21.2132	109.366	2.36613	0.0316161	0.76437	No	unnamed protein product	Vitis vinifera	NA	NA	NA	NA	NA
TR25849|c0_g5_i1	31.8198	164.049	2.36613	0.0320008	0.766453	No	hypothetical protein MIMGU_mgv1a002918mg	Mimulus guttatus	NA	ATP transport[GO:0015867] ; ADP transport[GO:0015866]	ATP:ADP antiporter activity[GO:0005471] ; ATP binding[GO:0005524]	integral component of membrane[GO:0016021]	NA
TR28756|c0_g1_i2	95.4594	492.146	2.36613	0.0227723	0.720643	No	hypothetical protein MIMGU_mgv1a003476mg	Mimulus guttatus	NA	transport[GO:0006810]	transporter activity[GO:0005215]	integral component of membrane[GO:0016021] ; intracellular[GO:0005622]	NA
TR7600|c0_g1_i2	613.062	3154.64	2.36337	0.0368057	0.788233	No	PREDICTED: alpha-galactosidase-like	Sesamum indicum	NA	NA	NA	NA	NA
TR40796|c0_g5_i5	67.8823	348.839	2.36146	0.0255302	0.735915	No	NA	NA	NA	NA	NA	NA	NA
TR36896|c0_g2_i1	299.106	1536.78	2.36118	0.0236997	0.734156	No	PREDICTED: uncharacterized protein LOC105172258	Sesamum indicum	NA	NA	NA	NA	NA
TR3674|c0_g1_i3	144.25	741.048	2.361	0.0212887	0.713259	No	PREDICTED: 21 kDa protein-like	Sesamum indicum	NA	NA	NA	NA	NA
TR33027|c0_g1_i1	19.0919	98.0521	2.36059	0.0299843	0.762149	No	NA	NA	NA	NA	NA	NA	NA
TR7600|c0_g1_i1	1003.38	5149.62	2.35959	0.0555381	0.847431	No	PREDICTED: alpha-galactosidase-like	Sesamum indicum	NA	NA	NA	NA	NA
TR37411|c0_g2_i1	101.823	522.316	2.35885	0.0227677	0.721053	No	hydroxypyruvate reductase	Solenostemon scutellarioides	NA	oxidation-reduction process[GO:0055114]	NAD binding[GO:0051287] ; glycerate dehydrogenase activity[GO:0008465]	NA	map00260:Glycine, serine and threonine metabolism(dehydrogenase[ec:1.1.1.29]) ; map00630:Glyoxylate and dicarboxylate metabolism(dehydrogenase[ec:1.1.1.29]) ; map01130:Biosynthesis of antibiotics(dehydrogenase[ec:1.1.1.29]) ; map00680:Methane metabolism(dehydrogenase[ec:1.1.1.29])
TR40961|c0_g3_i4	243.952	1250.16	2.35745	0.0223413	0.721454	No	PREDICTED: violaxanthin de-epoxidase, chloroplastic	Sesamum indicum	NA	NA	NA	NA	NA
TR40174|c0_g2_i1	36.0624	184.791	2.35732	0.031985	0.76652	No	PREDICTED: uncharacterized protein LOC105949855	Erythranthe guttatus	NA	NA	NA	NA	NA
TR40593|c0_g2_i1	16.9706	86.7384	2.35364	0.0275325	0.744518	No	PREDICTED: cytochrome P450 81E8-like, partial	Sesamum indicum	NA	NA	NA	NA	NA
TR20401|c0_g2_i1	25.4558	130.108	2.35364	0.0336123	0.77478	No	NA	NA	NA	NA	NA	NA	NA
TR3004|c0_g1_i3	42.4264	216.846	2.35364	0.030994	0.764171	No	hypothetical protein MIMGU_mgv1a014101mg	Mimulus guttatus	NA	NA	NA	NA	NA
TR34097|c0_g1_i1	59.397	303.585	2.35364	0.0270933	0.744903	No	PREDICTED: WAT1-related protein At5g07050	Sesamum indicum	NA	NA	NA	NA	NA
TR8009|c0_g1_i1	67.8823	346.954	2.35364	0.0260072	0.735725	No	PREDICTED: allantoinase	Sesamum indicum	NA	NA	NA	NA	NA
TR36789|c1_g1_i1	494.268	2522.96	2.35175	0.0321276	0.765473	No	PREDICTED: cytochrome P450 CYP72A219-like	Sesamum indicum	NA	NA	NA	NA	NA
TR30667|c3_g1_i6	152.735	778.76	2.35015	0.0217588	0.713868	No	PREDICTED: myb-related protein Myb4-like	Sesamum indicum	NA	NA	NA	NA	NA
TR41881|c0_g2_i3	140.007	712.764	2.34792	0.022028	0.718111	No	PREDICTED: glucose-6-phosphate 1-dehydrogenase, chloroplastic	Sesamum indicum	NA	NA	NA	NA	NA
TR3126|c0_g1_i1	570.635	2901.97	2.34639	0.0358475	0.785319	No	PREDICTED: CBS domain-containing protein CBSX1, chloroplastic	Sesamum indicum	NA	NA	NA	NA	NA
TR43590|c1_g6_i3	36.0624	182.905	2.34252	0.0330014	0.772401	No	PREDICTED: zinc finger CCCH domain-containing protein 29-like isoform 1	Solanum lycopersicum	NA	NA	NA	NA	NA
TR42776|c0_g6_i3	108.187	548.715	2.34252	0.0233307	0.729325	No	PREDICTED: uncharacterized protein LOC105165171	Sesamum indicum	NA	NA	NA	NA	NA
TR3217|c0_g2_i7	93.3381	473.29	2.34219	0.0243052	0.736797	No	PREDICTED: glucan endo-1,3-beta-glucosidase, basic isoform-like	Prunus mume	NA	NA	NA	NA	NA
TR3089|c0_g2_i2	1145.51	5807.7	2.34197	0.0638557	0.879885	No	PREDICTED: chlorophyll a-b binding protein 4, chloroplastic	Sesamum indicum	NA	NA	NA	NA	NA
TR31602|c0_g1_i3	120.915	612.826	2.34148	0.0228448	0.722382	No	hypothetical protein MIMGU_mgv1a014308mg	Mimulus guttatus	NA	NA	NA	NA	NA
TR24759|c0_g1_i1	21.2132	107.48	2.34104	0.0330441	0.772081	No	NA	NA	NA	NA	NA	NA	NA
TR32102|c0_g3_i1	21.2132	107.48	2.34104	0.0330441	0.77252	No	PREDICTED: uncharacterized protein LOC105170557 isoform X1	Sesamum indicum	NA	NA	NA	NA	NA
TR40831|c0_g6_i2	21.2132	107.48	2.34104	0.0330441	0.77296	No	PREDICTED: zinc finger CCCH domain-containing protein 29	Sesamum indicum	NA	NA	NA	NA	NA
TR33220|c0_g2_i3	91.2168	461.976	2.34045	0.024575	0.732011	No	hypothetical protein MIMGU_mgv1a011581mg	Mimulus guttatus	NA	NA	nucleic acid binding[GO:0003676] ; nucleotide binding[GO:0000166]	NA	NA
TR36836|c1_g3_i1	48.7904	247.016	2.33994	0.0303288	0.762882	No	NA	NA	NA	NA	NA	NA	NA
TR30853|c0_g3_i1	27.5772	139.536	2.33909	0.0345367	0.779896	No	PREDICTED: uncharacterized protein LOC105160689	Sesamum indicum	NA	NA	NA	NA	NA
TR41287|c1_g4_i2	72.1249	363.924	2.33507	0.0267159	0.743987	No	PREDICTED: histidinol dehydrogenase, chloroplastic isoform X3	Erythranthe guttatus	NA	NA	NA	NA	NA
TR43639|c0_g2_i3	78.4889	395.98	2.33487	0.0260699	0.734968	No	PREDICTED: U-box domain-containing protein 44	Sesamum indicum	NA	NA	NA	NA	NA
TR32745|c0_g2_i4	415.779	2094.92	2.33301	0.0296771	0.760458	No	hypothetical protein EUGRSUZ_B03604	Eucalyptus grandis	NA	microtubule-based process[GO:0007017] ; metabolic process[GO:0008152]	structural constituent of cytoskeleton[GO:0005200] ; GTP binding[GO:0005525] ; GTPase activity[GO:0003924]	cytoplasm[GO:0005737] ; microtubule[GO:0005874]	NA
TR29772|c0_g1_i1	19.0919	96.1665	2.33258	0.0313877	0.769721	No	hypothetical protein MIMGU_mgv1a024165mg, partial	Mimulus guttatus	NA	hydrogen ion transmembrane transport[GO:1902600] ; mitochondrial electron transport, ubiquinol to cytochrome c[GO:0006122]	ubiquinol-cytochrome-c reductase activity[GO:0008121]	mitochondrion[GO:0005739]	map00190:Oxidative phosphorylation(reductase[ec:1.10.2.2])
TR32920|c1_g1_i1	19.0919	96.1665	2.33258	0.0313877	0.768803	No	PREDICTED: cytochrome c6, chloroplastic	Erythranthe guttatus	NA	NA	NA	NA	NA
TR35838|c1_g5_i1	19.0919	96.1665	2.33258	0.0313877	0.769262	No	PREDICTED: uncharacterized protein LOC105170041	Sesamum indicum	NA	NA	NA	NA	NA
TR42933|c0_g4_i1	19.0919	96.1665	2.33258	0.0313877	0.770181	No	PREDICTED: beta-galactosidase 8-like	Sesamum indicum	NA	NA	NA	NA	NA
TR7708|c3_g2_i1	25.4558	128.222	2.33258	0.0350428	0.782292	No	PREDICTED: ACT domain-containing protein DS12, chloroplastic-like isoform X2	Sesamum indicum	NA	NA	NA	NA	NA
TR32614|c2_g1_i5	31.8198	160.278	2.33258	0.0343618	0.782832	No	NA	NA	NA	NA	NA	NA	NA
TR39780|c0_g7_i5	38.1838	192.333	2.33258	0.0334109	0.775798	No	NA	NA	NA	NA	NA	NA	NA
TR32529|c0_g1_i7	108.187	544.944	2.33258	0.0239032	0.73327	No	PREDICTED: uncharacterized protein LOC105162498	Sesamum indicum	NA	NA	NA	NA	NA
TR27606|c1_g1_i1	106.066	533.63	2.33088	0.0241205	0.734995	No	PREDICTED: glutamyl-tRNA(Gln) amidotransferase subunit B, chloroplastic/mitochondrial	Sesamum indicum	NA	NA	NA	NA	NA
TR39966|c0_g1_i1	827.315	4161.56	2.33062	0.0488543	0.82548	No	PREDICTED: isoamylase 3, chloroplastic	Erythranthe guttatus	NA	NA	NA	NA	NA
TR35172|c1_g2_i2	55.1543	277.186	2.32931	0.0295543	0.763024	No	hypothetical protein MIMGU_mgv1a019226mg	Mimulus guttatus	NA	NA	NA	NA	NA
TR33744|c0_g3_i1	36.0624	181.019	2.32757	0.0340587	0.779383	No	PREDICTED: uncharacterized protein LOC105169799 isoform X2	Sesamum indicum	NA	NA	NA	NA	NA
TR32950|c1_g4_i3	1126.42	5651.2	2.32681	0.0639593	0.879247	No	galactinol synthase	Salvia miltiorrhiza	NA	metabolic process[GO:0008152]	transferase activity, transferring glycosyl groups[GO:0016757]	NA	NA
TR22846|c0_g1_i2	29.6985	148.964	2.3265	0.0351684	0.781276	No	PREDICTED: ultraviolet-B receptor UVR8 isoform X2	Sesamum indicum	NA	NA	NA	NA	NA
TR43836|c1_g2_i3	29.6985	148.964	2.3265	0.0351684	0.780853	No	PREDICTED: serine/threonine-protein phosphatase 6 regulatory subunit 3	Sesamum indicum	NA	NA	NA	NA	NA
TR41451|c2_g1_i10	82.7315	414.836	2.32603	0.0262092	0.736872	No	PREDICTED: uncharacterized protein LOC104239662	Nicotiana sylvestris	NA	NA	NA	NA	NA
TR21011|c1_g1_i1	23.3345	116.908	2.32484	0.0351558	0.781841	No	hypothetical protein Csa_5G495920	Cucumis sativus	NA	NA	GTP binding[GO:0005525]	NA	NA
TR41672|c0_g2_i2	23.3345	116.908	2.32484	0.0351558	0.781418	No	PREDICTED: NAC domain-containing protein 78-like	Sesamum indicum	NA	NA	NA	NA	NA
TR36875|c0_g2_i1	383.959	1917.67	2.32033	0.0289696	0.755528	No	chloroplast PsbO2 precursor	Nicotiana benthamiana	NA	photosystem II stabilization[GO:0042549] ; photosynthesis[GO:0015979]	calcium ion binding[GO:0005509]	photosystem II oxygen evolving complex[GO:0009654] ; extrinsic component of membrane[GO:0019898] ; integral component of membrane[GO:0016021]	NA
TR44277|c4_g4_i1	27.5772	137.65	2.31946	0.035946	0.784548	No	PREDICTED: ETO1-like protein 1	Sesamum indicum	NA	NA	NA	NA	NA
TR8183|c0_g1_i2	27.5772	137.65	2.31946	0.035946	0.784131	No	unnamed protein product	Vitis vinifera	NA	NA	NA	NA	NA
TR31615|c0_g3_i1	470.933	2347.59	2.31759	0.0329826	0.772401	No	oxygen-evolving enhancer protein 3	Glycine max	NA	photosynthesis[GO:0015979]	calcium ion binding[GO:0005509]	photosystem II oxygen evolving complex[GO:0009654] ; extrinsic component of membrane[GO:0019898]	NA
TR36187|c0_g3_i6	101.823	507.231	2.31657	0.0252416	0.739005	No	PREDICTED: 20 kDa chaperonin, chloroplastic-like	Sesamum indicum	NA	NA	NA	NA	NA
TR25003|c0_g1_i1	21.2132	105.595	2.3155	0.0345418	0.779582	No	hypothetical protein MIMGU_mgv1a016899mg	Mimulus guttatus	NA	NA	NA	NA	NA
TR38407|c1_g1_i6	21.2132	105.595	2.3155	0.0345418	0.779154	No	NA	NA	NA	NA	NA	NA	NA
TR43209|c1_g7_i2	21.2132	105.595	2.3155	0.0345418	0.778299	No	PREDICTED: putative clathrin assembly protein At2g25430	Sesamum indicum	NA	NA	NA	NA	NA
TR22867|c0_g1_i1	21.2132	105.595	2.3155	0.0345418	0.778726	No	NA	NA	NA	NA	NA	NA	NA
TR35840|c2_g7_i2	127.279	633.568	2.3155	0.0241111	0.735255	No	PREDICTED: abscisic acid receptor PYL8-like	Phoenix dactylifera	NA	NA	NA	NA	NA
TR34505|c0_g1_i2	146.371	727.849	2.31401	0.0237811	0.732808	No	PREDICTED: derlin-2.2	Sesamum indicum	NA	NA	NA	NA	NA
TR41893|c0_g1_i1	67.8823	337.526	2.31389	0.0285525	0.752775	No	hypothetical protein MIMGU_mgv1a004726mg	Mimulus guttatus	NA	response to stress[GO:0006950] ; regulation of transcription, DNA-templated[GO:0006355]	lipid binding[GO:0008289]	integral component of membrane[GO:0016021]	NA
TR2648|c0_g3_i1	57.2756	284.728	2.31359	0.0302163	0.762387	No	PREDICTED: uncharacterized protein LOC105157188	Sesamum indicum	NA	NA	NA	NA	NA
TR2361|c2_g1_i7	458.205	2277.83	2.31359	0.032636	0.769992	No	sesquiterpene synthase	Azadirachta indica var. indica	NA	NA	NA	NA	NA
TR39766|c1_g2_i2	25.4558	126.336	2.3112	0.0365421	0.78669	No	NA	NA	NA	NA	NA	NA	NA
TR35318|c1_g1_i4	787.01	3899.46	2.30882	0.0483503	0.824082	No	NA	NA	NA	NA	NA	NA	NA
TR41103|c3_g9_i1	14.8492	73.5391	2.30812	0.0254085	0.737061	No	NA	NA	NA	NA	NA	NA	NA
TR41264|c0_g3_i5	89.0955	441.235	2.30812	0.0267637	0.744309	No	PREDICTED: nephrocystin-3	Sesamum indicum	NA	NA	NA	NA	NA
TR38225|c0_g1_i6	148.492	735.391	2.30812	0.0240855	0.73502	No	PREDICTED: probable quinone oxidoreductase	Sesamum indicum	NA	NA	NA	NA	NA
TR39963|c2_g2_i4	280.014	1385.93	2.30728	0.0258667	0.733771	No	NA	NA	NA	NA	NA	NA	NA
TR33791|c0_g10_i4	33.9411	167.82	2.30581	0.0359792	0.784022	No	NA	NA	NA	NA	NA	NA	NA
TR33966|c1_g3_i1	33.9411	167.82	2.30581	0.0359792	0.783606	No	PREDICTED: probable serine/threonine-protein kinase drkD	Sesamum indicum	NA	NA	NA	NA	NA
TR3435|c2_g8_i2	53.033	262.101	2.30516	0.0317968	0.766033	No	PREDICTED: probable calcium-binding protein CML36	Sesamum indicum	NA	NA	NA	NA	NA
TR38320|c1_g1_i4	19.0919	94.2809	2.30401	0.0328804	0.772209	No	NA	NA	NA	NA	NA	NA	NA
TR42649|c2_g9_i1	38.1838	188.562	2.30401	0.0355173	0.784359	No	NA	NA	NA	NA	NA	NA	NA
TR3421|c1_g6_i4	114.551	565.685	2.30401	0.025281	0.739104	No	NA	NA	NA	NA	NA	NA	NA
TR42297|c2_g4_i3	165.463	816.473	2.3029	0.024243	0.735998	No	hypothetical protein M569_15756, partial	Genlisea aurea	NA	NA	NA	NA	NA
TR43738|c0_g7_i2	108.187	533.63	2.30231	0.0257246	0.735326	No	PREDICTED: protein translocase subunit SecA, chloroplastic isoform X1	Sesamum indicum	NA	NA	NA	NA	NA
TR33460|c0_g1_i1	256.68	1263.36	2.29923	0.0256616	0.734549	No	PREDICTED: peptidyl-prolyl cis-trans isomerase 1	Sesamum indicum	NA	NA	NA	NA	NA
TR40005|c0_g4_i1	135.765	667.509	2.29768	0.0249273	0.737158	No	NA	NA	NA	NA	NA	NA	NA
TR31969|c2_g6_i5	36.0624	177.248	2.2972	0.036306	0.784897	No	PREDICTED: abscisic acid receptor PYR1	Populus euphratica	NA	NA	NA	NA	NA
TR26032|c0_g2_i1	93.3381	458.205	2.29546	0.0272202	0.742427	No	NA	NA	NA	NA	NA	NA	NA
TR29041|c0_g2_i8	286.378	1404.79	2.29436	0.0267676	0.743914	No	PREDICTED: 30S ribosomal protein S13, chloroplastic	Sesamum indicum	NA	NA	NA	NA	NA
TR36914|c1_g6_i6	74.2462	363.924	2.29325	0.0292493	0.759446	No	hypothetical protein MIMGU_mgv1a008508mg	Mimulus guttatus	NA	proteolysis[GO:0006508]	serine-type peptidase activity[GO:0008236]	NA	NA
TR41958|c0_g1_i7	99.7021	488.375	2.29229	0.026923	0.742706	No	PREDICTED: protein trichome birefringence-like 23	Sesamum indicum	NA	NA	NA	NA	NA
TR32352|c0_g1_i2	280.014	1370.84	2.29149	0.0267351	0.744017	No	PREDICTED: embryogenesis-associated protein EMB8	Sesamum indicum	NA	NA	NA	NA	NA
TR32843|c1_g2_i1	159.099	778.76	2.29125	0.0249484	0.737251	No	unnamed protein product	Coffea canephora	NA	nucleosome assembly[GO:0006334]	DNA binding[GO:0003677]	nucleosome[GO:0000786] ; nucleus[GO:0005634]	NA
TR2383|c0_g6_i1	1156.12	5653.08	2.28975	0.0682219	0.891595	No	PREDICTED: photosystem I reaction center subunit XI, chloroplastic	Sesamum indicum	NA	NA	NA	NA	NA
TR34259|c2_g2_i3	16.9706	82.9672	2.28951	0.0304255	0.764377	No	hypothetical protein MIMGU_mgv1a009676mg	Mimulus guttatus	NA	NA	NA	NA	NA
TR26235|c0_g1_i2	21.2132	103.709	2.28951	0.0361131	0.785689	No	hypothetical protein MIMGU_mgv1a016899mg	Mimulus guttatus	NA	NA	NA	NA	NA
TR34174|c0_g8_i1	21.2132	103.709	2.28951	0.0361131	0.785273	No	PREDICTED: uncharacterized protein LOC105165747	Sesamum indicum	NA	NA	NA	NA	NA
TR42854|c0_g2_i3	25.4558	124.451	2.28951	0.0381139	0.792692	No	PREDICTED: LOW QUALITY PROTEIN: CRS2-associated factor 1, chloroplastic	Sesamum indicum	NA	NA	NA	NA	NA
TR38407|c1_g1_i1	29.6985	145.193	2.28951	0.0379672	0.792047	No	basic helix-loop-helix transcription factor	Salvia miltiorrhiza	NA	NA	protein dimerization activity[GO:0046983]	NA	NA
TR34249|c0_g5_i2	33.9411	165.934	2.28951	0.0372349	0.788382	No	PREDICTED: peptidyl-prolyl cis-trans isomerase CYP18-2	Sesamum indicum	NA	NA	NA	NA	NA
TR35658|c0_g3_i2	50.9117	248.902	2.28951	0.0335329	0.776874	No	hypothetical protein POPTR_0003s08070g	Populus trichocarpa	NA	NA	NA	integral component of membrane[GO:0016021]	NA
TR35064|c0_g1_i8	101.823	497.803	2.28951	0.0269503	0.742462	No	PREDICTED: histone deacetylase 14 isoform X1	Sesamum indicum	NA	NA	NA	NA	NA
TR41231|c0_g2_i3	123.037	601.512	2.28951	0.025808	0.735151	No	PREDICTED: pentatricopeptide repeat-containing protein At3g59040	Sesamum indicum	NA	NA	NA	NA	NA
TR25208|c0_g1_i2	140.007	684.479	2.28951	0.02532	0.737098	No	PREDICTED: DNA topoisomerase 2 isoform X1	Sesamum indicum	NA	NA	NA	NA	NA
TR7631|c0_g2_i3	568.514	2777.52	2.28853	0.0392308	0.799725	No	PREDICTED: uncharacterized protein LOC105156392	Sesamum indicum	NA	NA	NA	NA	NA
TR38013|c0_g1_i1	156.978	765.561	2.28596	0.0252783	0.739551	No	PREDICTED: serine/arginine repetitive matrix protein 1 isoform X1	Erythranthe guttatus	NA	NA	NA	NA	NA
TR2390|c0_g1_i4	74.2462	362.039	2.28575	0.0297688	0.76091	No	PREDICTED: uncharacterized protein LOC104089428	Nicotiana tomentosiformis	NA	NA	NA	NA	NA
TR30168|c0_g10_i2	53.033	258.33	2.28425	0.0333926	0.775811	No	PREDICTED: uncharacterized protein LOC105158092	Sesamum indicum	NA	NA	NA	NA	NA
TR31753|c0_g1_i5	146.371	712.764	2.28379	0.0255442	0.735802	No	PREDICTED: PGR5-like protein 1A, chloroplastic	Sesamum indicum	NA	NA	NA	NA	NA
TR3872|c0_g1_i1	40.3051	196.104	2.28259	0.0367986	0.789315	No	Ubiquitin-like superfamily protein	Theobroma cacao	NA	autophagy[GO:0006914]	NA	NA	NA
TR39085|c0_g3_i1	36.0624	175.362	2.28177	0.0375	0.789114	No	PREDICTED: histone H1-like	Sesamum indicum	NA	NA	NA	NA	NA
TR35124|c0_g1_i1	63.6396	309.241	2.28074	0.0314263	0.768373	No	hypothetical protein MIMGU_mgv1a006001mg	Mimulus guttatus	NA	carbohydrate metabolic process[GO:0005975]	hydrolase activity, hydrolyzing O-glycosyl compounds[GO:0004553]	NA	NA
TR26278|c0_g1_i1	27.5772	133.879	2.27938	0.0389671	0.797913	No	PREDICTED: calcium-transporting ATPase 4, plasma membrane-type-like	Sesamum indicum	NA	NA	NA	NA	NA
TR38770|c0_g1_i6	27.5772	133.879	2.27938	0.0389671	0.798311	No	NA	NA	NA	NA	NA	NA	NA
TR7473|c0_g1_i6	27.5772	133.879	2.27938	0.0389671	0.798709	No	PREDICTED: MYB-like transcription factor ETC3	Sesamum indicum	NA	NA	NA	NA	NA
TR42331|c0_g1_i1	184.555	895.669	2.27892	0.0256375	0.735395	No	PREDICTED: uncharacterized protein LOC105167066	Sesamum indicum	NA	NA	NA	NA	NA
TR31953|c0_g1_i1	5422.09	26306.3	2.27848	0.26169	1.09262	No	PREDICTED: bifunctional nuclease 2	Sesamum indicum	NA	NA	NA	NA	NA
TR34262|c0_g1_i4	70.0036	339.411	2.27753	0.0308259	0.765078	No	hypothetical protein MIMGU_mgv1a022756mg	Mimulus guttatus	NA	NA	binding[GO:0005488]	NA	NA
TR27131|c0_g1_i3	163.342	791.96	2.27753	0.0257318	0.73502	No	NA	NA	NA	NA	NA	NA	NA
TR32931|c2_g1_i3	89.0955	431.807	2.27696	0.0288417	0.756031	No	PREDICTED: UDP-glycosyltransferase 83A1-like	Sesamum indicum	NA	NA	NA	NA	NA
TR38702|c1_g4_i1	19.0919	92.3953	2.27486	0.0344692	0.78354	No	NA	NA	NA	NA	NA	NA	NA
TR39250|c0_g2_i1	19.0919	92.3953	2.27486	0.0344692	0.783974	No	PREDICTED: uncharacterized protein LOC105171867	Sesamum indicum	NA	NA	NA	NA	NA
TR41983|c0_g5_i1	19.0919	92.3953	2.27486	0.0344692	0.783107	No	NA	NA	NA	NA	NA	NA	NA
TR26133|c0_g1_i3	57.2756	277.186	2.27486	0.0331032	0.773023	No	hypothetical protein MIMGU_mgv1a026849mg	Mimulus guttatus	NA	NA	NA	integral component of membrane[GO:0016021]	NA
TR35719|c0_g1_i4	284.257	1374.62	2.27376	0.027873	0.746843	No	PREDICTED: type I inositol 1,4,5-trisphosphate 5-phosphatase 1-like isoform X1	Sesamum indicum	NA	NA	NA	NA	NA
TR34960|c0_g1_i6	53.033	256.444	2.27368	0.0342251	0.782321	No	PREDICTED: MATE efflux family protein 5-like isoform X2	Erythranthe guttatus	NA	NA	NA	NA	NA
TR3956|c0_g4_i6	1291.88	6245.17	2.27326	0.0765946	0.911413	No	PREDICTED: plastocyanin-like	Sesamum indicum	NA	NA	NA	NA	NA
TR42093|c0_g1_i3	33.9411	164.049	2.27302	0.0385447	0.796009	No	hypothetical protein MIMGU_mgv1a025513mg	Mimulus guttatus	NA	oxidation-reduction process[GO:0055114]	heme binding[GO:0020037] ; oxidoreductase activity, acting on paired donors, with incorporation or reduction of molecular oxygen[GO:0016705] ; monooxygenase activity[GO:0004497] ; iron ion binding[GO:0005506]	NA	NA
TR42738|c1_g9_i3	239.709	1157.77	2.27199	0.026805	0.743947	No	Ankyrin repeat-containing-like protein	Theobroma cacao	NA	NA	NA	NA	NA
TR35717|c1_g4_i2	14.8492	71.6535	2.27065	0.0268074	0.74301	No	hypothetical protein L484_022099	Morus notabilis	NA	NA	NA	integral component of membrane[GO:0016021]	NA
TR38707|c0_g1_i1	14.8492	71.6535	2.27065	0.0268074	0.742509	No	JHL06B08.5	Jatropha curcas	NA	metabolic process[GO:0008152]	transferase activity, transferring hexosyl groups[GO:0016758]	NA	NA
TR43390|c1_g6_i1	14.8492	71.6535	2.27065	0.0268074	0.742008	No	PREDICTED: protein disulfide-isomerase-like	Sesamum indicum	NA	NA	NA	NA	NA
TR35742|c0_g1_i5	14.8492	71.6535	2.27065	0.0268074	0.741509	No	hypothetical protein M569_12032	Genlisea aurea	NA	metabolic process[GO:0008152]	hydro-lyase activity[GO:0016836]	NA	NA
TR39454|c0_g3_i1	29.6985	143.307	2.27065	0.0394638	0.801292	No	hypothetical protein B456_009G246900	Gossypium raimondii	NA	cellular oxidant detoxification[GO:0098869] ; oxidation-reduction process[GO:0055114] ; response to oxidative stress[GO:0006979]	heme binding[GO:0020037] ; peroxidase activity[GO:0004601]	NA	map00940:Phenylpropanoid biosynthesis(lactoperoxidase[ec:1.11.1.7])
TR30280|c1_g2_i1	44.5477	214.96	2.27065	0.0367623	0.788948	No	hypothetical protein B456_009G064300	Gossypium raimondii	NA	NA	unfolded protein binding[GO:0051082] ; heat shock protein binding[GO:0031072]	NA	NA
TR3267|c1_g1_i1	74.2462	358.267	2.27065	0.0308401	0.76497	No	PREDICTED: nicotinamidase-like	Sesamum indicum	NA	NA	NA	NA	NA
TR40680|c2_g1_i3	339.411	1636.72	2.2697	0.0300184	0.762545	No	NA	NA	NA	NA	NA	NA	NA
TR35664|c1_g2_i2	110.309	531.744	2.26919	0.02773	0.74642	No	hypothetical protein MIMGU_mgv1a003608mg	Mimulus guttatus	NA	metabolic process[GO:0008152]	catalytic activity[GO:0003824]	NA	NA
TR42227|c1_g2_i4	110.309	531.744	2.26919	0.02773	0.74691	No	PREDICTED: telomere repeat-binding protein 5	Sesamum indicum	NA	NA	NA	NA	NA
TR39957|c2_g1_i4	356.382	1717.8	2.26906	0.0307238	0.763466	No	PREDICTED: uncharacterized protein LOC105164663 isoform X1	Sesamum indicum	NA	NA	NA	NA	NA
TR32213|c0_g8_i6	40.3051	194.219	2.26865	0.0379175	0.792218	No	PREDICTED: uncharacterized protein LOC105180257	Sesamum indicum	NA	NA	NA	NA	NA
TR38649|c0_g1_i4	40.3051	194.219	2.26865	0.0379175	0.793025	No	PREDICTED: probable LRR receptor-like serine/threonine-protein kinase At4g36180	Sesamum indicum	NA	NA	NA	NA	NA
TR42532|c0_g10_i2	40.3051	194.219	2.26865	0.0379175	0.792621	No	hypothetical protein MIMGU_mgv1a013143mg	Mimulus guttatus	NA	cell cycle[GO:0007049] ; regulation of transcription, DNA-templated[GO:0006355]	transcription factor activity, sequence-specific DNA binding[GO:0003700]	NA	NA
TR42502|c1_g3_i4	148.492	714.649	2.26685	0.0265491	0.741354	No	hypothetical protein MIMGU_mgv1a000979mg	Mimulus guttatus	NA	oxylipin biosynthetic process[GO:0031408] ; oxidation-reduction process[GO:0055114]	metal ion binding[GO:0046872] ; oxidoreductase activity, acting on single donors with incorporation of molecular oxygen, incorporation of two atoms of oxygen[GO:0016702]	NA	NA
TR32189|c0_g4_i1	36.0624	173.477	2.26617	0.0387438	0.795721	No	PREDICTED: uncharacterized protein LOC104115794	Nicotiana tomentosiformis	NA	NA	NA	NA	NA
TR24537|c0_g1_i2	72.1249	346.954	2.26617	0.0314048	0.768763	No	PREDICTED: acyl-coenzyme A oxidase 3, peroxisomal-like	Sesamum indicum	NA	NA	NA	NA	NA
TR36984|c0_g1_i2	93.3381	448.777	2.26546	0.029251	0.75901	No	PREDICTED: uncharacterized protein LOC105163168	Sesamum indicum	NA	NA	NA	NA	NA
TR8216|c1_g5_i2	67.8823	326.212	2.2647	0.0320021	0.766036	No	PREDICTED: EH domain-containing protein 1-like	Sesamum indicum	NA	NA	NA	NA	NA
TR39756|c1_g4_i1	1168.85	5613.49	2.26381	0.0709059	0.903671	No	PREDICTED: UDP-glucuronate 4-epimerase 6	Sesamum indicum	NA	NA	NA	NA	NA
TR41634|c1_g2_i6	10.6066	50.9117	2.26303	0.0134813	0.625717	No	PREDICTED: filament-like plant protein 3	Sesamum indicum	NA	NA	NA	NA	NA
TR38592|c0_g1_i1	21.2132	101.823	2.26303	0.0377619	0.790979	No	PREDICTED: dnaJ homolog 1, mitochondrial-like	Sesamum indicum	NA	NA	NA	NA	NA
TR34096|c0_g3_i2	31.8198	152.735	2.26303	0.039744	0.802224	No	hypothetical protein MIMGU_mgv1a008991mg	Mimulus guttatus	NA	oxidation-reduction process[GO:0055114]	metal ion binding[GO:0046872] ; oxidoreductase activity[GO:0016491]	NA	NA
TR41465|c0_g6_i1	42.4264	203.647	2.26303	0.0379194	0.791855	No	PREDICTED: probable transporter mch1	Sesamum indicum	NA	NA	NA	NA	NA
TR41569|c0_g2_i4	551.543	2645.52	2.26201	0.0401381	0.800346	No	PREDICTED: inner membrane protein PPF-1, chloroplastic isoform X2	Sesamum indicum	NA	NA	NA	NA	NA
TR42738|c1_g9_i2	237.588	1138.91	2.26112	0.027402	0.742457	No	PREDICTED: uncharacterized protein LOC105970915	Erythranthe guttatus	NA	NA	NA	NA	NA
TR20919|c0_g1_i1	48.7904	233.817	2.26071	0.036426	0.785425	No	unnamed protein product	Coffea canephora	NA	NA	NA	NA	NA
TR2545|c0_g2_i1	89.0955	426.15	2.25794	0.030179	0.762383	No	NA	NA	NA	NA	NA	NA	NA
TR43412|c0_g4_i2	2613.47	12496	2.25743	0.143171	1.01904	No	hypothetical protein EUTSA_v10016370mg	Eutrema salsugineum	NA	thiamine biosynthetic process[GO:0009228]	iron-sulfur cluster binding[GO:0051536]	NA	NA
TR28810|c0_g1_i4	16.9706	81.0816	2.25634	0.0320235	0.764321	No	hypothetical protein M569_07629	Genlisea aurea	NA	NA	NA	integral component of membrane[GO:0016021]	NA
TR3622|c1_g1_i2	33.9411	162.163	2.25634	0.0399111	0.801265	No	unnamed protein product	Coffea canephora	NA	NA	NA	integral component of membrane[GO:0016021]	NA
TR37801|c0_g1_i1	33.9411	162.163	2.25634	0.0399111	0.800873	No	PREDICTED: alcohol dehydrogenase 1B	Sesamum indicum	NA	NA	NA	NA	NA
TR34693|c0_g1_i3	74.2462	354.496	2.25538	0.0319564	0.766282	No	PREDICTED: sugar transport protein 14-like	Sesamum indicum	NA	NA	NA	NA	NA
TR38038|c0_g2_i5	40.3051	192.333	2.25457	0.0390743	0.798912	No	NA	NA	NA	NA	NA	NA	NA
TR30735|c0_g1_i5	110.309	526.087	2.25376	0.0287739	0.754737	No	NA	NA	NA	NA	NA	NA	NA
TR3036|c1_g1_i3	169.706	808.93	2.25298	0.0272088	0.742611	No	hypothetical protein MIMGU_mgv1a001772mg	Mimulus guttatus	NA	lipid metabolic process[GO:0006629]	glycerophosphodiester phosphodiesterase activity[GO:0008889]	integral component of membrane[GO:0016021]	map00564:Glycerophospholipid metabolism(phosphodiesterase[ec:3.1.4.46])
TR40443|c0_g1_i5	59.397	282.843	2.25154	0.0344756	0.782819	No	PREDICTED: probable serine/threonine-protein kinase At1g01540	Sesamum indicum	NA	NA	NA	NA	NA
TR40996|c0_g1_i3	125.158	595.855	2.25121	0.0281886	0.751866	No	PREDICTED: BAG family molecular chaperone regulator 6	Sesamum indicum	NA	NA	NA	NA	NA
TR26711|c1_g1_i3	36.0624	171.591	2.25041	0.0400397	0.801105	No	PREDICTED: protein MODIFIER OF SNC1 1	Erythranthe guttatus	NA	NA	NA	NA	NA
TR38673|c1_g5_i1	36.0624	171.591	2.25041	0.0400397	0.801496	No	PREDICTED: uncharacterized protein LOC105159671 isoform X1	Sesamum indicum	NA	NA	NA	NA	NA
TR40086|c0_g5_i1	36.0624	171.591	2.25041	0.0400397	0.802278	No	PREDICTED: ribulose-1,5 bisphosphate carboxylase/oxygenase large subunit N-methyltransferase, chloroplastic isoform X2	Sesamum indicum	NA	NA	NA	NA	NA
TR41596|c0_g3_i3	36.0624	171.591	2.25041	0.0400397	0.801886	No	PREDICTED: ornithine aminotransferase, mitochondrial	Sesamum indicum	NA	NA	NA	NA	NA
TR25557|c0_g1_i1	48.7904	231.931	2.24903	0.037406	0.789157	No	PREDICTED: uncharacterized protein LOC105168254	Sesamum indicum	NA	NA	NA	NA	NA
TR31101|c0_g1_i2	97.5807	463.862	2.24903	0.0300444	0.762735	No	PREDICTED: fatty acyl-CoA reductase 3-like	Sesamum indicum	NA	NA	NA	NA	NA
TR42204|c1_g4_i1	398.808	1895.05	2.24847	0.033793	0.775898	No	PREDICTED: uncharacterized protein LOC105155456	Sesamum indicum	NA	NA	NA	NA	NA
TR2793|c0_g5_i2	927.017	4402.92	2.24779	0.0597221	0.857444	No	NA	NA	NA	NA	NA	NA	NA
TR43188|c0_g4_i6	369.11	1751.74	2.24667	0.0326089	0.769795	No	PREDICTED: phosphoglucan, water dikinase, chloroplastic	Sesamum indicum	NA	NA	NA	NA	NA
TR36645|c2_g1_i1	12.7279	60.3398	2.24511	0.0214732	0.714196	No	PREDICTED: glucan endo-1,3-beta-glucosidase-like	Sesamum indicum	NA	NA	NA	NA	NA
TR39106|c1_g4_i13	12.7279	60.3398	2.24511	0.0214732	0.713618	No	hypothetical protein MIMGU_mgv1a009055mg	Mimulus guttatus	NA	NA	hydrolase activity[GO:0016787]	NA	NA
TR40069|c0_g1_i1	25.4558	120.68	2.24511	0.0414902	0.800493	No	NA	NA	NA	NA	NA	NA	NA
TR38652|c0_g1_i1	31.8198	150.849	2.24511	0.041243	0.79948	No	PREDICTED: uncharacterized protein LOC105159329 isoform X1	Sesamum indicum	NA	NA	NA	NA	NA
TR31323|c0_g2_i3	108.187	512.888	2.24511	0.0295139	0.762941	No	PREDICTED: protein ETHYLENE INSENSITIVE 3	Sesamum indicum	NA	NA	NA	NA	NA
TR1667|c0_g1_i6	161.22	763.675	2.24393	0.0278425	0.747002	No	NA	NA	NA	NA	NA	NA	NA
TR7739|c0_g1_i1	142.128	673.166	2.24377	0.0281586	0.752532	No	PREDICTED: xanthoxin dehydrogenase	Sesamum indicum	NA	NA	NA	NA	NA
TR28751|c0_g1_i1	271.529	1284.11	2.24159	0.0294314	0.762248	No	PREDICTED: uncharacterized protein LOC105168142	Sesamum indicum	NA	NA	NA	NA	NA
TR37268|c0_g1_i5	46.669	220.617	2.24101	0.0386844	0.796093	No	PREDICTED: protein STRICTOSIDINE SYNTHASE-LIKE 11	Sesamum indicum	NA	NA	NA	NA	NA
TR39520|c1_g7_i5	636.396	3007.56	2.2406	0.0457196	0.817578	No	PREDICTED: aspartic proteinase-like isoform X1	Sesamum indicum	NA	NA	NA	NA	NA
TR36063|c0_g3_i7	392.444	1853.56	2.23974	0.0340565	0.779768	No	PREDICTED: uncharacterized protein LOC105948969	Erythranthe guttatus	NA	NA	NA	NA	NA
TR43170|c0_g3_i1	203.647	961.665	2.23947	0.0281884	0.752351	No	NA	NA	NA	NA	NA	NA	NA
TR42149|c0_g2_i10	171.827	810.816	2.23842	0.028131	0.752284	No	PREDICTED: G-type lectin S-receptor-like serine/threonine-protein kinase At4g27290	Erythranthe guttatus	NA	NA	NA	NA	NA
TR36731|c1_g1_i1	27.5772	130.108	2.23816	0.0422816	0.798877	No	hypothetical protein MIMGU_mgv1a010861mg	Mimulus guttatus	NA	metabolic process[GO:0008152]	hydrolase activity[GO:0016787]	NA	NA
TR34533|c0_g2_i1	48.7904	230.045	2.23725	0.0384159	0.796152	No	PREDICTED: prosaposin-like isoform X2	Sesamum indicum	NA	NA	NA	NA	NA
TR3634|c2_g4_i1	2167.99	10218.2	2.23671	0.124136	0.995515	No	vanillin synthase	Glechoma hederacea	Lamiaceae	proteolysis[GO:0006508]	cysteine-type peptidase activity[GO:0008234]	NA	NA
TR29330|c0_g5_i3	133.643	629.796	2.2365	0.0288795	0.756057	No	PREDICTED: uncharacterized protein LOC105172026	Sesamum indicum	NA	NA	NA	NA	NA
TR40760|c0_g2_i4	21.2132	99.9378	2.23607	0.0394927	0.801087	No	Leucine-rich repeat protein kinase family protein isoform 1	Theobroma cacao	NA	protein phosphorylation[GO:0006468]	ATP binding[GO:0005524] ; protein serine/threonine kinase activity[GO:0004674]	NA	NA
TR42165|c0_g3_i1	21.2132	99.9378	2.23607	0.0394927	0.801483	No	PREDICTED: outer envelope protein 64, chloroplastic isoform X1	Sesamum indicum	NA	NA	NA	NA	NA
TR34904|c0_g2_i2	42.4264	199.876	2.23607	0.040203	0.796997	No	PREDICTED: uncharacterized protein LOC105953019	Erythranthe guttatus	NA	NA	NA	NA	NA
TR36781|c0_g1_i2	220.617	1038.98	2.23554	0.0286625	0.752776	No	hypothetical protein MIMGU_mgv1a007404mg	Mimulus guttatus	NA	cation transmembrane transport[GO:0098655]	cation transmembrane transporter activity[GO:0008324]	integral component of membrane[GO:0016021]	NA
TR36101|c0_g1_i6	655.488	3084.87	2.23457	0.0470938	0.818631	No	PREDICTED: uncharacterized protein LOC105158378	Sesamum indicum	NA	NA	NA	NA	NA
TR29306|c1_g2_i7	29.6985	139.536	2.23217	0.0426675	0.800644	No	O-methyltransferase	Mentha x piperita	NA	methylation[GO:0032259]	O-methyltransferase activity[GO:0008171] ; protein dimerization activity[GO:0046983]	NA	NA
TR43354|c0_g4_i3	74.2462	348.839	2.23217	0.0337197	0.77595	No	PREDICTED: L-type lectin-domain containing receptor kinase VIII.2-like	Sesamum indicum	NA	NA	NA	NA	NA
TR42813|c0_g1_i3	214.253	1005.03	2.22986	0.0289312	0.755965	No	PREDICTED: uncharacterized protein LOC105163554	Sesamum indicum	NA	NA	NA	NA	NA
TR38798|c0_g1_i2	237.588	1114.4	2.22973	0.0293433	0.760446	No	PREDICTED: non-specific phospholipase C3-like	Sesamum indicum	NA	NA	NA	NA	NA
TR35742|c0_g1_i8	99.7021	467.633	2.22968	0.0312754	0.768801	No	hypothetical protein M569_12032	Genlisea aurea	NA	metabolic process[GO:0008152]	hydro-lyase activity[GO:0016836]	NA	NA
TR43738|c0_g7_i3	31.8198	148.964	2.22697	0.0428094	0.80111	No	PREDICTED: protein translocase subunit SecA, chloroplastic isoform X1	Sesamum indicum	NA	NA	NA	NA	NA
TR39659|c1_g1_i3	63.6396	297.928	2.22697	0.0356149	0.784407	No	PREDICTED: E3 ubiquitin-protein ligase COP1-like	Sesamum indicum	NA	NA	NA	NA	NA
TR34959|c0_g1_i3	112.43	526.087	2.22628	0.0305826	0.762265	No	PREDICTED: probable mitochondrial chaperone bcs1	Nicotiana sylvestris	NA	NA	NA	NA	NA
TR7816|c0_g1_i4	40.3051	188.562	2.226	0.0415068	0.800437	No	PREDICTED: uncharacterized protein LOC105161097	Sesamum indicum	NA	NA	NA	NA	NA
TR36424|c1_g2_i1	1022.48	4780.04	2.22496	0.0664527	0.882227	No	hypothetical protein MIMGU_mgv1a014875mg	Mimulus guttatus	NA	cell redox homeostasis[GO:0045454] ; glycerol ether metabolic process[GO:0006662] ; oxidation-reduction process[GO:0055114]	protein disulfide oxidoreductase activity[GO:0015035]	cell[GO:0005623]	NA
TR2256|c1_g2_i2	16.9706	79.196	2.22239	0.0337347	0.775427	No	hypothetical protein MIMGU_mgv1a015217mg	Mimulus guttatus	NA	NA	NA	NA	NA
TR2942|c0_g1_i3	16.9706	79.196	2.22239	0.0337347	0.775861	No	NA	NA	NA	NA	NA	NA	NA
TR31934|c0_g3_i1	33.9411	158.392	2.22239	0.0428245	0.800664	No	hypothetical protein B456_012G087400	Gossypium raimondii	NA	translation[GO:0006412]	structural constituent of ribosome[GO:0003735]	ribosome[GO:0005840]	NA
TR40464|c2_g6_i1	76.3675	356.382	2.22239	0.0342378	0.782175	No	hypothetical protein POPTR_1455s00210g	Populus trichocarpa	NA	microtubule-based process[GO:0007017]	structural constituent of cytoskeleton[GO:0005200] ; GTP binding[GO:0005525]	microtubule[GO:0005874]	NA
TR3355|c0_g1_i2	513.36	2394.73	2.22182	0.0410125	0.797646	No	PREDICTED: protein TIC 62, chloroplastic	Sesamum indicum	NA	NA	NA	NA	NA
TR2973|c0_g4_i1	129.401	603.398	2.22127	0.0300852	0.762357	No	PREDICTED: BEL1-like homeodomain protein 1	Sesamum indicum	NA	NA	NA	NA	NA
TR32797|c2_g1_i2	184.555	859.842	2.22002	0.0293311	0.76061	No	PREDICTED: probable S-adenosylmethionine-dependent methyltransferase At5g37990	Sesamum indicum	NA	NA	NA	NA	NA
TR32784|c0_g2_i4	27.5772	128.222	2.2171	0.0440584	0.810817	No	NA	NA	NA	NA	NA	NA	NA
TR29549|c1_g1_i1	74.2462	345.068	2.21649	0.0349578	0.780819	No	PREDICTED: probable WRKY transcription factor 50	Sesamum indicum	NA	NA	NA	NA	NA
TR36678|c0_g1_i2	65.7609	305.47	2.21573	0.0361635	0.784708	No	PREDICTED: probable F-box protein At1g60180	Sesamum indicum	NA	NA	NA	NA	NA
TR35889|c0_g2_i4	199.404	925.838	2.21507	0.0297375	0.761057	No	PREDICTED: ammonium transporter 1 member 1-like	Sesamum indicum	NA	NA	NA	NA	NA
TR2813|c0_g2_i1	19.0919	88.624	2.21474	0.0379673	0.790843	No	PREDICTED: neutral ceramidase isoform X1	Sesamum indicum	NA	NA	NA	NA	NA
TR33031|c0_g1_i2	19.0919	88.624	2.21474	0.0379673	0.791646	No	NA	NA	NA	NA	NA	NA	NA
TR44231|c0_g1_i2	19.0919	88.624	2.21474	0.0379673	0.791245	No	PREDICTED: ABC transporter B family member 1-like	Sesamum indicum	NA	NA	NA	NA	NA
TR41479|c0_g2_i2	973.686	4516.06	2.21353	0.064867	0.876184	No	unknown	Lotus japonicus	NA	carbohydrate metabolic process[GO:0005975]	glycogen phosphorylase activity[GO:0008184]	NA	NA
TR31101|c0_g1_i1	99.7021	461.976	2.21212	0.032603	0.770099	No	PREDICTED: fatty acyl-CoA reductase 3-like	Sesamum indicum	NA	NA	NA	NA	NA
TR38900|c0_g1_i5	70.0036	324.326	2.21195	0.0358346	0.785455	No	PREDICTED: dicarboxylate transporter 2.1, chloroplastic	Vigna radiata var. radiata	NA	NA	NA	NA	NA
TR37234|c0_g4_i1	21.2132	98.0521	2.20859	0.0413172	0.799786	No	PREDICTED: uncharacterized protein LOC105174471	Sesamum indicum	NA	NA	NA	NA	NA
TR37727|c1_g2_i1	21.2132	98.0521	2.20859	0.0413172	0.800164	No	PREDICTED: probable protein phosphatase 2C 63	Sesamum indicum	NA	NA	NA	NA	NA
TR41176|c1_g3_i10	21.2132	98.0521	2.20859	0.0413172	0.800541	No	hypothetical protein MIMGU_mgv1a008110mg	Mimulus guttatus	NA	NA	NA	NA	NA
TR39132|c1_g1_i3	31.8198	147.078	2.20859	0.0444464	0.809614	No	NA	NA	NA	NA	NA	NA	NA
TR2390|c0_g1_i3	74.2462	343.182	2.20859	0.0355965	0.784422	No	PREDICTED: uncharacterized protein LOC104089428	Nicotiana tomentosiformis	NA	NA	NA	NA	NA
TR29119|c0_g1_i2	44.5477	205.532	2.20594	0.0423772	0.79848	No	PREDICTED: cyclin-dependent kinase F-4-like isoform X2	Sesamum indicum	NA	NA	NA	NA	NA
TR3449|c0_g1_i5	123.037	567.571	2.20571	0.0314906	0.76675	No	NA	NA	NA	NA	NA	NA	NA
TR36951|c0_g1_i4	78.4889	362.039	2.20558	0.0353366	0.782894	No	PREDICTED: uncharacterized protein LOC105169569	Sesamum indicum	NA	NA	NA	NA	NA
TR33024|c0_g1_i7	101.823	469.519	2.20511	0.0329623	0.773249	No	PREDICTED: putative 12-oxophytodienoate reductase 11 isoform X1	Erythranthe guttatus	NA	NA	NA	NA	NA
TR8252|c2_g1_i5	125.158	576.999	2.20482	0.0314546	0.767237	No	PREDICTED: uncharacterized protein At5g05190	Sesamum indicum	NA	NA	NA	NA	NA
TR32372|c0_g1_i5	229.103	1055.95	2.20447	0.0308408	0.764525	No	NA	NA	NA	NA	NA	NA	NA
TR8262|c2_g7_i3	46.669	214.96	2.20353	0.0420327	0.798952	No	PREDICTED: proton pump-interactor 1-like	Sesamum indicum	NA	NA	NA	NA	NA
TR31831|c1_g1_i1	59.397	273.415	2.20263	0.0386108	0.795774	No	hypothetical protein GLYMA_02G064700	Glycine max	NA	photosynthesis, light harvesting[GO:0009765] ; protein-chromophore linkage[GO:0018298]	chlorophyll binding[GO:0016168]	photosystem II[GO:0009523] ; integral component of membrane[GO:0016021] ; chloroplast[GO:0009507]	NA
TR42023|c0_g3_i13	36.0624	165.934	2.20204	0.0442637	0.809156	No	NA	NA	NA	NA	NA	NA	NA
TR39198|c0_g1_i4	207.889	956.008	2.20121	0.0307563	0.763813	No	PREDICTED: uncharacterized protein LOC105172267 isoform X1	Sesamum indicum	NA	NA	NA	NA	NA
TR34371|c2_g1_i2	555.786	2555.01	2.20073	0.0446147	0.811242	No	PREDICTED: uncharacterized protein LOC105165426	Sesamum indicum	NA	NA	NA	NA	NA
TR35719|c0_g1_i3	99.7021	458.205	2.2003	0.033525	0.77713	No	PREDICTED: type I inositol 1,4,5-trisphosphate 5-phosphatase 1-like isoform X2	Sesamum indicum	NA	NA	NA	NA	NA
TR33592|c0_g6_i6	25.4558	116.908	2.19931	0.0452049	0.814045	No	PREDICTED: nifU-like protein 2, chloroplastic	Sesamum indicum	NA	NA	NA	NA	NA
TR44272|c1_g1_i1	25.4558	116.908	2.19931	0.0452049	0.814402	No	PREDICTED: sister chromatid cohesion protein PDS5 homolog A	Sesamum indicum	NA	NA	NA	NA	NA
TR31753|c0_g1_i6	409.415	1879.96	2.19907	0.0375271	0.78928	No	PREDICTED: PGR5-like protein 1A, chloroplastic	Sesamum indicum	NA	NA	NA	NA	NA
TR29215|c0_g1_i3	129.401	593.97	2.19855	0.031734	0.765867	No	PREDICTED: stress enhanced protein 1, chloroplastic-like	Sesamum indicum	NA	NA	NA	NA	NA
TR37087|c1_g2_i1	53.033	243.245	2.19745	0.0407707	0.796338	No	PREDICTED: homeobox-leucine zipper protein HOX11-like	Sesamum indicum	NA	NA	NA	NA	NA
TR41564|c1_g3_i2	106.066	486.489	2.19745	0.0332119	0.77468	No	PREDICTED: probable galactinol--sucrose galactosyltransferase 6	Sesamum indicum	NA	NA	NA	NA	NA
TR40069|c0_g1_i2	40.3051	184.791	2.19686	0.0441079	0.810638	No	PREDICTED: rhodanese-like domain-containing protein 8, chloroplastic	Sesamum indicum	NA	NA	NA	NA	NA
TR29837|c0_g1_i3	27.5772	126.336	2.19572	0.0459205	0.815844	No	NA	NA	NA	NA	NA	NA	NA
TR37335|c0_g1_i5	55.1543	252.673	2.19572	0.0403341	0.797672	No	PREDICTED: uncharacterized protein LOC105177113	Sesamum indicum	NA	NA	NA	NA	NA
TR43207|c1_g4_i7	55.1543	252.673	2.19572	0.0403341	0.797288	No	PREDICTED: protoporphyrinogen oxidase 1, chloroplastic	Sesamum indicum	NA	NA	NA	NA	NA
TR29057|c0_g2_i3	42.4264	194.219	2.19465	0.0439202	0.809362	No	PREDICTED: mitochondrial uncoupling protein 5-like	Nicotiana sylvestris	NA	NA	NA	NA	NA
TR37899|c0_g6_i1	72.1249	329.983	2.19382	0.0370724	0.789008	No	NA	NA	NA	NA	NA	NA	NA
TR26413|c0_g2_i1	14.8492	67.8823	2.19265	0.0299304	0.762669	No	NA	NA	NA	NA	NA	NA	NA
TR34421|c0_g1_i3	14.8492	67.8823	2.19265	0.0299304	0.762196	No	PREDICTED: NAD-dependent protein deacetylase SRT2	Erythranthe guttatus	NA	NA	NA	NA	NA
TR40449|c0_g3_i2	14.8492	67.8823	2.19265	0.0299304	0.761724	No	NA	NA	NA	NA	NA	NA	NA
TR31786|c1_g4_i9	29.6985	135.765	2.19265	0.0461762	0.81615	No	NA	NA	NA	NA	NA	NA	NA
TR36925|c0_g7_i1	29.6985	135.765	2.19265	0.0461762	0.816501	No	Q8OMT_MENPIRecName: Full=8-hydroxyquercetin 8-O-methyltransferase; AltName: Full=Flavonol 8-O-methyltransferase	Mentha piperita	Lamiaceae	methylation[GO:0032259] ; flavonoid metabolic process[GO:0009812]	8-hydroxyquercitin 8-O-methyltransferase activity[GO:0030761] ; O-methyltransferase activity[GO:0008171] ; protein dimerization activity[GO:0046983]	NA	NA
TR24545|c0_g1_i1	182.434	833.443	2.19171	0.03128	0.768456	No	hypothetical protein B456_005G050200	Gossypium raimondii	NA	carbohydrate metabolic process[GO:0005975] ; malate metabolic process[GO:0006108] ; tricarboxylic acid cycle[GO:0006099]	L-malate dehydrogenase activity[GO:0030060]	NA	map00630:Glyoxylate and dicarboxylate metabolism(dehydrogenase[ec:1.1.1.37]) ; map01130:Biosynthesis of antibiotics(dehydrogenase[ec:1.1.1.37]) ; map00720:Carbon fixation pathways in prokaryotes(dehydrogenase[ec:1.1.1.37]) ; map00020:Citrate cycle (TCA cycle)(dehydrogenase[ec:1.1.1.37]) ; map00620:Pyruvate metabolism(dehydrogenase[ec:1.1.1.37]) ; map00270:Cysteine and methionine metabolism(dehydr…
TR32504|c2_g5_i1	46.669	213.075	2.19082	0.0432201	0.801857	No	actin	Ipomoea nil	NA	NA	NA	NA	NA
TR2920|c0_g1_i4	31.8198	145.193	2.18997	0.0461575	0.816875	No	PREDICTED: uncharacterized protein LOC105166759	Sesamum indicum	NA	NA	NA	NA	NA
TR36972|c0_g3_i1	207.889	948.466	2.18978	0.0315497	0.765016	No	PREDICTED: metal-nicotianamine transporter YSL1 isoform X1	Erythranthe guttatus	NA	NA	NA	NA	NA
TR2491|c0_g1_i5	80.6102	367.696	2.18948	0.0364162	0.785626	No	NA	NA	NA	NA	NA	NA	NA
TR32385|c0_g7_i4	48.7904	222.503	2.18916	0.042776	0.80085	No	NA	NA	NA	NA	NA	NA	NA
TR38251|c1_g3_i1	82.7315	377.124	2.18853	0.0362465	0.78485	No	hypothetical protein MIMGU_mgv1a006166mg	Mimulus guttatus	NA	methylation[GO:0032259]	methyltransferase activity[GO:0008168]	NA	NA
TR42423|c1_g3_i1	16.9706	77.3103	2.18763	0.0355698	0.784254	No	hypothetical protein JCGZ_05918	Jatropha curcas	NA	protein phosphorylation[GO:0006468]	protein kinase activity[GO:0004672] ; ATP binding[GO:0005524]	NA	NA
TR23928|c0_g1_i6	33.9411	154.621	2.18763	0.0459981	0.815811	No	PREDICTED: 29 kDa ribonucleoprotein A, chloroplastic	Sesamum indicum	NA	NA	NA	NA	NA
TR40086|c0_g7_i8	186.676	850.414	2.18763	0.0315729	0.764675	No	PREDICTED: ribulose-1,5 bisphosphate carboxylase/oxygenase large subunit N-methyltransferase, chloroplastic isoform X1	Sesamum indicum	NA	NA	NA	NA	NA
TR41934|c0_g6_i2	36.0624	164.049	2.18556	0.0457925	0.81604	No	PREDICTED: protein ECERIFERUM 3-like	Fragaria vesca subsp. vesca	NA	NA	NA	NA	NA
TR44218|c2_g3_i7	112.43	511.003	2.1843	0.0337711	0.775828	No	PREDICTED: uncharacterized protein LOC105170351	Sesamum indicum	NA	NA	NA	NA	NA
TR38026|c0_g2_i1	19.0919	86.7384	2.18371	0.0398946	0.801717	No	hypothetical protein JCGZ_10577	Jatropha curcas	NA	NA	NA	NA	NA
TR40188|c0_g1_i1	19.0919	86.7384	2.18371	0.0398946	0.801325	No	PREDICTED: lysosomal beta glucosidase-like	Sesamum indicum	NA	NA	NA	NA	NA
TR39227|c1_g2_i4	114.551	520.431	2.18371	0.0336718	0.775717	No	PREDICTED: F-box protein At3g07870-like	Sesamum indicum	NA	NA	NA	NA	NA
TR36920|c0_g1_i1	229.103	1040.86	2.18371	0.0322748	0.766311	No	PREDICTED: proton-coupled amino acid transporter 3-like	Sesamum indicum	NA	NA	NA	NA	NA
TR32352|c0_g1_i1	354.26	1608.43	2.18277	0.0362243	0.784782	No	PREDICTED: embryogenesis-associated protein EMB8	Sesamum indicum	NA	NA	NA	NA	NA
TR44609|c8_g2_i1	59.397	269.643	2.18259	0.0404266	0.794909	No	NA	NA	NA	NA	NA	NA	NA
TR38396|c1_g1_i1	445.477	2021.38	2.18192	0.0404937	0.795846	No	PREDICTED: uncharacterized protein LOC105158308	Sesamum indicum	NA	NA	NA	NA	NA
TR39166|c0_g2_i5	267.286	1212.45	2.18147	0.0332917	0.774782	No	NA	NA	NA	NA	NA	NA	NA
TR39677|c3_g1_i1	502.753	2279.71	2.18093	0.0434294	0.803562	No	PREDICTED: beta-glucosidase 44-like	Sesamum indicum	NA	NA	NA	NA	NA
TR38459|c0_g1_i4	86.9741	394.094	2.17988	0.0364865	0.785905	No	hypothetical protein MIMGU_mgv1a007636mg	Mimulus guttatus	NA	NA	NA	NA	NA
TR21190|c0_g1_i1	23.3345	105.595	2.178	0.045768	0.816666	No	PREDICTED: calcium-transporting ATPase 4, plasma membrane-type-like	Sesamum indicum	NA	NA	NA	NA	NA
TR34380|c0_g1_i2	23.3345	105.595	2.178	0.045768	0.816312	No	PREDICTED: uncharacterized protein LOC105174762	Sesamum indicum	NA	NA	NA	NA	NA
TR29321|c0_g8_i1	93.3381	422.378	2.178	0.0359547	0.783905	No	PREDICTED: uncharacterized protein LOC105178466	Sesamum indicum	NA	NA	NA	NA	NA
TR26645|c0_g1_i2	127.279	575.114	2.17585	0.0335611	0.776652	No	NA	NA	NA	NA	NA	NA	NA
TR44290|c0_g1_i1	311.834	1408.56	2.17537	0.0351215	0.782773	No	PREDICTED: uncharacterized protein LOC105166886	Sesamum indicum	NA	NA	NA	NA	NA
TR36319|c0_g4_i1	78.4889	354.496	2.17521	0.0378851	0.792749	No	PREDICTED: glutamate decarboxylase	Sesamum indicum	NA	NA	NA	NA	NA
TR39800|c0_g1_i3	53.033	239.473	2.1749	0.042897	0.800562	No	PREDICTED: microtubule-associated protein 70-5 isoform X2	Sesamum indicum	NA	NA	NA	NA	NA
TR37555|c0_g8_i7	55.1543	248.902	2.17403	0.0423698	0.798707	No	PREDICTED: GEM-like protein 6	Sesamum indicum	NA	NA	NA	NA	NA
TR26539|c0_g1_i2	415.779	1876.19	2.17392	0.0396104	0.801891	No	PREDICTED: glutathione S-transferase L3-like	Sesamum indicum	NA	NA	NA	NA	NA
TR2425|c0_g2_i3	417.9	1885.62	2.17381	0.0397205	0.802144	No	chloroplast ferredoxin-thioredoxin reductase catalytic chain	Nicotiana benthamiana	NA	phosphorylation[GO:0016310] ; oxidation-reduction process[GO:0055114]	oxidoreductase activity, acting on iron-sulfur proteins as donors[GO:0016730] ; glucose-1-phosphate phosphodismutase activity[GO:0047937]	NA	map00500:Starch and sucrose metabolism(phosphodismutase[ec:2.7.1.41])
TR4078|c2_g1_i4	169.706	765.561	2.17348	0.0326647	0.770226	No	PREDICTED: uncharacterized protein LOC105173489 isoform X1	Sesamum indicum	NA	NA	NA	NA	NA
TR44801|c2_g3_i1	29.6985	133.879	2.17247	0.0480546	0.825551	No	PREDICTED: clustered mitochondria protein	Sesamum indicum	NA	NA	NA	NA	NA
TR38905|c1_g2_i1	282.136	1270.91	2.1714	0.0344323	0.784002	No	basic helix-loop-helix transcription factor	Salvia miltiorrhiza	NA	NA	protein dimerization activity[GO:0046983]	NA	NA
TR40209|c2_g3_i6	95.4594	429.921	2.17111	0.0363161	0.784704	No	PREDICTED: uncharacterized protein LOC105172763	Sesamum indicum	NA	NA	NA	NA	NA
TR2417|c0_g1_i2	235.467	1059.72	2.17009	0.0333654	0.775618	No	hypothetical protein CICLE_v10008962mg	Citrus clementina	NA	inositol catabolic process[GO:0019310] ; oxidation-reduction process[GO:0055114]	iron ion binding[GO:0005506] ; inositol oxygenase activity[GO:0050113]	cytoplasm[GO:0005737]	map00562:Inositol phosphate metabolism(oxygenase[ec:1.13.99.1]) ; map00053:Ascorbate and aldarate metabolism(oxygenase[ec:1.13.99.1])
TR38912|c2_g1_i4	33.9411	152.735	2.16993	0.0476903	0.823425	No	BAG-domain protein 1 / regulator of cell death	Plantago major	NA	NA	NA	NA	NA
TR3452|c0_g1_i2	142.128	639.225	2.16913	0.0335164	0.777367	No	PREDICTED: inositol-tetrakisphosphate 1-kinase 2 isoform X1	Sesamum indicum	NA	NA	NA	NA	NA
TR43056|c0_g7_i2	72.1249	324.326	2.16888	0.0392209	0.79992	No	PREDICTED: uncharacterized protein LOC105158896, partial	Sesamum indicum	NA	NA	NA	NA	NA
TR42246|c0_g2_i3	38.1838	171.591	2.16794	0.0471046	0.818473	No	PREDICTED: MAP7 domain-containing protein 1	Sesamum indicum	NA	NA	NA	NA	NA
TR35734|c0_g1_i4	154.856	695.793	2.16773	0.0333074	0.774707	No	PREDICTED: uncharacterized protein LOC105177167	Sesamum indicum	NA	NA	NA	NA	NA
TR32904|c0_g1_i1	80.6102	362.039	2.16711	0.0383319	0.794811	No	hypothetical protein MIMGU_mgv1a001022mg	Mimulus guttatus	NA	translational initiation[GO:0006413]	GTP binding[GO:0005525] ; translation initiation factor activity[GO:0003743] ; GTPase activity[GO:0003924]	intracellular[GO:0005622]	NA
TR28795|c0_g2_i2	82.7315	371.467	2.16672	0.03811	0.793013	No	hypothetical protein MIMGU_mgv1a016078mg	Mimulus guttatus	NA	NA	NA	NA	NA
TR29630|c0_g1_i3	93.3381	418.607	2.16506	0.0370525	0.788994	No	PREDICTED: RING-H2 finger protein ATL74	Vitis vinifera	NA	NA	metal ion binding[GO:0046872]	membrane[GO:0016020]	NA
TR25557|c0_g1_i2	48.7904	218.732	2.16449	0.0451635	0.81688	No	PREDICTED: uncharacterized protein LOC105168254	Sesamum indicum	NA	NA	NA	NA	NA
TR35488|c0_g5_i1	48.7904	218.732	2.16449	0.0451635	0.816521	No	hypothetical protein MIMGU_mgv1a011745mg	Mimulus guttatus	NA	translation[GO:0006412]	structural constituent of ribosome[GO:0003735]	ribosome[GO:0005840]	NA
TR36234|c0_g1_i1	55.1543	247.016	2.16306	0.0434319	0.803245	No	hypothetical protein MIMGU_mgv1a013949mg	Mimulus guttatus	NA	NA	NA	NA	NA
TR39153|c0_g1_i3	55.1543	247.016	2.16306	0.0434319	0.802884	No	NA	NA	NA	NA	NA	NA	NA
TR8141|c0_g3_i1	333.047	1491.52	2.16299	0.0367987	0.788905	No	PREDICTED: MAR-binding filament-like protein 1-1	Sesamum indicum	NA	NA	NA	NA	NA
TR2385|c0_g1_i1	197.283	882.469	2.16128	0.0335364	0.776516	No	NA	NA	NA	NA	NA	NA	NA
TR42812|c3_g4_i3	203.647	910.754	2.16099	0.0335988	0.774905	No	PREDICTED: fructose-1,6-bisphosphatase, cytosolic	Sesamum indicum	NA	NA	NA	NA	NA
TR3332|c1_g1_i4	288.5	1289.76	2.16046	0.0354211	0.783498	No	PREDICTED: thylakoid lumenal 16.5 kDa protein, chloroplastic	Sesamum indicum	NA	NA	NA	NA	NA
TR27864|c0_g1_i1	86.9741	388.437	2.15902	0.0382852	0.794645	No	PREDICTED: MADS-box protein SVP-like	Sesamum indicum	NA	NA	NA	NA	NA
TR30014|c0_g3_i3	116.673	520.431	2.15724	0.0356776	0.784525	No	unknown	Glycine max	NA	microtubule-based process[GO:0007017] ; metabolic process[GO:0008152]	structural constituent of cytoskeleton[GO:0005200] ; GTP binding[GO:0005525] ; GTPase activity[GO:0003924]	microtubule[GO:0005874]	NA
TR32995|c0_g1_i6	133.643	595.855	2.15658	0.0348119	0.780107	No	PREDICTED: protein CURVATURE THYLAKOID 1A, chloroplastic-like	Sesamum indicum	NA	NA	NA	NA	NA
TR31877|c0_g1_i2	150.614	671.28	2.15606	0.0343076	0.783335	No	PREDICTED: probable isoaspartyl peptidase/L-asparaginase 3 isoform X1	Erythranthe guttatus	NA	NA	NA	NA	NA
TR33321|c4_g1_i5	226.981	1010.69	2.1547	0.0343517	0.783906	No	PREDICTED: flavanone 3-dioxygenase-like	Sesamum indicum	NA	NA	NA	NA	NA
TR40748|c0_g2_i2	10.6066	47.1405	2.152	0.0150407	0.644898	No	PREDICTED: peptide transporter PTR2-like	Glycine max	NA	oligopeptide transport[GO:0006857]	transporter activity[GO:0005215]	integral component of membrane[GO:0016021]	NA
TR14741|c0_g1_i1	12.7279	56.5685	2.152	0.0240441	0.735394	No	hypothetical protein MIMGU_mgv1a009762mg	Mimulus guttatus	NA	protein phosphorylation[GO:0006468] ; signal transduction[GO:0007165]	protein kinase activity[GO:0004672] ; ATP binding[GO:0005524]	integral component of membrane[GO:0016021]	NA
TR34096|c0_g1_i1	16.9706	75.4247	2.152	0.0375406	0.78916	No	PREDICTED: protein SRG1-like	Sesamum indicum	NA	NA	NA	NA	NA
TR3741|c3_g1_i1	16.9706	75.4247	2.152	0.0375406	0.788756	No	PREDICTED: ethylene-responsive transcription factor RAP2-4	Sesamum indicum	NA	NA	NA	NA	NA
TR41009|c0_g4_i3	19.0919	84.8528	2.152	0.0419544	0.798943	No	PREDICTED: uncharacterized protein LOC105175670 isoform X1	Sesamum indicum	NA	NA	NA	NA	NA
TR29105|c2_g2_i1	21.2132	94.2809	2.152	0.0453202	0.815049	No	hypothetical protein B456_006G267400	Gossypium raimondii	NA	translational frameshifting[GO:0006452] ; positive regulation of translational termination[GO:0045905] ; positive regulation of translational elongation[GO:0045901]	translation elongation factor activity[GO:0003746] ; ribosome binding[GO:0043022]	NA	NA
TR33601|c0_g4_i3	23.3345	103.709	2.152	0.0478594	0.825303	No	NA	NA	NA	NA	NA	NA	NA
TR39374|c0_g6_i2	23.3345	103.709	2.152	0.0478594	0.82461	No	hypothetical protein MIMGU_mgv1a011028mg	Mimulus guttatus	NA	NA	NA	NA	NA
TR3954|c1_g2_i3	23.3345	103.709	2.152	0.0478594	0.824957	No	hypothetical protein MIMGU_mgv1a004245mg	Mimulus guttatus	NA	proteolysis[GO:0006508]	aspartic-type endopeptidase activity[GO:0004190]	integral component of membrane[GO:0016021]	NA
TR43655|c1_g8_i1	23.3345	103.709	2.152	0.0478594	0.825649	No	PREDICTED: uncharacterized protein At2g40430	Sesamum indicum	NA	NA	NA	NA	NA
TR28997|c0_g2_i1	25.4558	113.137	2.152	0.0492957	0.825804	No	PREDICTED: anthocyanidin 3-O-glucosyltransferase 2-like	Sesamum indicum	NA	NA	NA	NA	NA
TR38075|c0_g2_i3	27.5772	122.565	2.152	0.0499189	0.829478	No	NA	NA	NA	NA	NA	NA	NA
TR38146|c0_g2_i2	27.5772	122.565	2.152	0.0499189	0.829143	No	PREDICTED: zinc finger Ran-binding domain-containing protein 2 isoform X1	Sesamum indicum	NA	NA	NA	NA	NA
TR31684|c0_g4_i1	38.1838	169.706	2.152	0.0486643	0.824983	No	hypothetical protein MIMGU_mgv1a014682mg	Mimulus guttatus	NA	NA	DNA binding[GO:0003677]	nucleus[GO:0005634]	NA
TR22821|c0_g1_i2	42.4264	188.562	2.152	0.048023	0.826044	No	PREDICTED: elongation factor G-1, chloroplastic	Sesamum indicum	NA	NA	NA	NA	NA
TR28735|c0_g2_i2	42.4264	188.562	2.152	0.048023	0.82639	No	PREDICTED: uncharacterized protein LOC105155864	Sesamum indicum	NA	NA	NA	NA	NA
TR44460|c1_g5_i1	42.4264	188.562	2.152	0.048023	0.825698	No	NA	NA	NA	NA	NA	NA	NA
TR34732|c1_g1_i6	53.033	235.702	2.152	0.0451508	0.81701	No	PREDICTED: RNA polymerase II C-terminal domain phosphatase-like 4	Sesamum indicum	NA	NA	NA	NA	NA
TR26139|c1_g1_i3	165.463	735.391	2.152	0.0343536	0.783514	No	putative metallothionin 2a	Salvia miltiorrhiza	NA	NA	metal ion binding[GO:0046872]	NA	NA
TR37092|c5_g1_i2	1438.26	6392.25	2.152	0.0952349	0.944896	No	PREDICTED: tubulin beta-3 chain-like	Sesamum indicum	NA	NA	NA	NA	NA
TR39082|c2_g3_i2	362.746	1608.43	2.14862	0.0390727	0.799278	No	PREDICTED: uncharacterized protein LOC105156326	Sesamum indicum	NA	NA	NA	NA	NA
TR37781|c0_g1_i2	428.507	1898.82	2.14771	0.0421872	0.799668	No	PREDICTED: uncharacterized protein LOC105174142	Sesamum indicum	NA	NA	NA	NA	NA
TR3439|c0_g2_i2	127.279	563.8	2.14719	0.0358776	0.783888	No	unnamed protein product	Coffea canephora	NA	NA	NA	NA	NA
TR3786|c0_g1_i11	118.794	526.087	2.14684	0.0364087	0.785877	No	PREDICTED: nucleolin 1-like	Sesamum indicum	NA	NA	NA	NA	NA
TR37679|c0_g2_i1	108.187	478.947	2.14633	0.037251	0.78791	No	PREDICTED: purple acid phosphatase 18-like	Sesamum indicum	NA	NA	NA	NA	NA
TR35166|c0_g5_i4	490.025	2168.46	2.14574	0.04548	0.815424	No	PREDICTED: thioredoxin-like protein CDSP32, chloroplastic	Sesamum indicum	NA	NA	NA	NA	NA
TR41021|c0_g1_i2	78.4889	346.954	2.14418	0.0406487	0.796226	No	PREDICTED: pectinesterase/pectinesterase inhibitor PPE8B-like	Sesamum indicum	NA	NA	NA	NA	NA
TR34453|c0_g2_i4	59.397	262.101	2.14166	0.0443669	0.810683	No	PREDICTED: uncharacterized protein LOC105158360	Sesamum indicum	NA	NA	NA	NA	NA
TR31759|c0_g5_i2	439.113	1936.53	2.14081	0.043253	0.801741	No	PREDICTED: 50S ribosomal protein L5, chloroplastic	Sesamum indicum	NA	NA	NA	NA	NA
TR36972|c0_g2_i2	210.011	925.838	2.1403	0.0352336	0.781455	No	PREDICTED: metal-nicotianamine transporter YSL1-like isoform X1	Sesamum indicum	NA	NA	NA	NA	NA
TR41615|c0_g2_i5	50.9117	224.389	2.13993	0.0470176	0.819735	No	PREDICTED: probable transcription factor GLK1	Sesamum indicum	NA	NA	NA	NA	NA
TR39277|c1_g1_i3	99.7021	439.349	2.13967	0.038621	0.795584	No	hypothetical protein MIMGU_mgv1a002844mg	Mimulus guttatus	NA	L-serine biosynthetic process[GO:0006564] ; oxidation-reduction process[GO:0055114]	NAD binding[GO:0051287] ; phosphoglycerate dehydrogenase activity[GO:0004617] ; amino acid binding[GO:0016597]	NA	map00260:Glycine, serine and threonine metabolism(dehydrogenase[ec:1.1.1.95]) ; map01130:Biosynthesis of antibiotics(dehydrogenase[ec:1.1.1.95]) ; map00680:Methane metabolism(dehydrogenase[ec:1.1.1.95])
TR42377|c0_g2_i1	299.106	1316.16	2.13761	0.0374801	0.789909	No	hypothetical protein MIMGU_mgv1a023739mg	Mimulus guttatus	NA	transmembrane transport[GO:0055085]	substrate-specific transmembrane transporter activity[GO:0022891]	integral component of membrane[GO:0016021]	NA
TR36497|c0_g3_i2	125.158	550.6	2.13726	0.0368311	0.787956	No	PREDICTED: 5-formyltetrahydrofolate cyclo-ligase-like protein COG0212	Sesamum indicum	NA	NA	NA	NA	NA
TR35610|c0_g1_i1	40.3051	177.248	2.13674	0.0498749	0.829082	No	hypothetical protein MIMGU_mgv1a012372mg	Mimulus guttatus	NA	NA	NA	NA	NA
TR8069|c0_g1_i2	277.893	1221.88	2.1365	0.0369041	0.788286	No	PREDICTED: RNA polymerase sigma factor sigA	Sesamum indicum	NA	NA	NA	NA	NA
TR35166|c0_g5_i5	1902.82	8360.83	2.1355	0.121341	0.988337	No	PREDICTED: thioredoxin-like protein CDSP32, chloroplastic	Sesamum indicum	NA	NA	NA	NA	NA
TR2352|c0_g1_i2	36.0624	158.392	2.13493	0.050782	0.830383	No	PREDICTED: cyclic nucleotide-gated ion channel 4	Sesamum indicum	NA	NA	NA	NA	NA
TR35055|c0_g2_i3	4157.79	18260.3	2.13482	0.221982	1.07323	No	PREDICTED: thiamine thiazole synthase 1, chloroplastic	Eucalyptus grandis	NA	NA	NA	NA	NA
TR41685|c0_g1_i2	237.588	1042.75	2.13386	0.0361327	0.784869	No	PREDICTED: uncharacterized protein LOC105169651	Sesamum indicum	NA	NA	NA	NA	NA
TR41685|c0_g1_i7	237.588	1042.75	2.13386	0.0361327	0.785284	No	PREDICTED: uncharacterized protein LOC105169651	Sesamum indicum	NA	NA	NA	NA	NA
TR2181|c0_g2_i1	31.8198	139.536	2.13264	0.0517733	0.836272	No	PREDICTED: glycerophosphodiester phosphodiesterase GDPDL3-like	Sesamum indicum	NA	NA	NA	NA	NA
TR34019|c0_g2_i1	31.8198	139.536	2.13264	0.0517733	0.836601	No	NA	NA	NA	NA	NA	NA	NA
TR3786|c0_g1_i10	127.279	558.143	2.13264	0.037108	0.789357	No	PREDICTED: nucleolin 1-like	Sesamum indicum	NA	NA	NA	NA	NA
TR7994|c0_g1_i4	91.2168	399.751	2.13173	0.0402551	0.797261	No	PREDICTED: probable receptor-like protein kinase At1g80640 isoform X2	Sesamum indicum	NA	NA	NA	NA	NA
TR44425|c1_g3_i6	29.6985	130.108	2.13124	0.0520814	0.835009	No	NA	NA	NA	NA	NA	NA	NA
TR25329|c0_g1_i2	27.5772	120.68	2.12964	0.052065	0.835073	No	PREDICTED: uncharacterized protein LOC105172555	Sesamum indicum	NA	NA	NA	NA	NA
TR26148|c0_g2_i1	137.886	603.398	2.12964	0.0368705	0.788387	No	PREDICTED: probable steroid-binding protein 3	Sesamum indicum	NA	NA	NA	NA	NA
TR40050|c0_g1_i7	182.434	797.616	2.12832	0.0360989	0.785797	No	PREDICTED: uncharacterized protein LOC105163866	Sesamum indicum	NA	NA	NA	NA	NA
TR2958|c0_g1_i2	50.9117	222.503	2.12776	0.0482875	0.824036	No	PREDICTED: protein NRT1/ PTR FAMILY 5.2-like	Sesamum indicum	NA	NA	NA	NA	NA
TR37078|c0_g2_i5	50.9117	222.503	2.12776	0.0482875	0.823694	No	H(\+)-transporting atpase plant/fungi plasma membrane type, putative	Ricinus communis	NA	hydrogen ion transmembrane transport[GO:1902600] ; metabolic process[GO:0008152]	hydrogen-exporting ATPase activity, phosphorylative mechanism[GO:0008553] ; metal ion binding[GO:0046872] ; ATP binding[GO:0005524]	integral component of membrane[GO:0016021]	map00190:Oxidative phosphorylation(ATPase[ec:3.6.3.6])
TR39779|c0_g8_i1	48.7904	213.075	2.12669	0.0490311	0.826088	No	hypothetical protein MIMGU_mgv1a0125392mg, partial	Mimulus guttatus	NA	NA	NA	NA	NA
TR36126|c0_g2_i2	23.3345	101.823	2.12553	0.0500574	0.826429	No	NA	NA	NA	NA	NA	NA	NA
TR39132|c1_g1_i7	23.3345	101.823	2.12553	0.0500574	0.826097	No	NA	NA	NA	NA	NA	NA	NA
TR16247|c0_g1_i1	21.2132	92.3953	2.12286	0.0475179	0.821484	No	PREDICTED: 28 kDa ribonucleoprotein, chloroplastic-like	Sesamum indicum	NA	NA	NA	NA	NA
TR26854|c0_g1_i2	21.2132	92.3953	2.12286	0.0475179	0.82183	No	hypothetical protein MIMGU_mgv1a010108mg	Mimulus guttatus	NA	protein phosphorylation[GO:0006468]	protein kinase activity[GO:0004672] ; ATP binding[GO:0005524]	NA	NA
TR41968|c0_g12_i1	21.2132	92.3953	2.12286	0.0475179	0.822176	No	PREDICTED: argininosuccinate lyase, chloroplastic isoform X2	Sesamum indicum	NA	NA	NA	NA	NA
TR43846|c1_g3_i2	21.2132	92.3953	2.12286	0.0475179	0.822523	No	PREDICTED: calmodulin-binding transcription activator 2	Sesamum indicum	NA	NA	NA	NA	NA
TR3510|c0_g5_i1	42.4264	184.791	2.12286	0.050994	0.831862	No	hypothetical protein MIMGU_mgv1a014086mg	Mimulus guttatus	NA	NA	NA	integral component of membrane[GO:0016021]	NA
TR32274|c1_g3_i2	358.503	1561.29	2.12268	0.040903	0.798542	No	NA	NA	NA	NA	NA	NA	NA
TR39104|c0_g1_i4	82.7315	360.153	2.1221	0.0421809	0.799918	No	PREDICTED: dehydrogenase/reductase SDR family member on chromosome X-like isoform X1	Sesamum indicum	NA	NA	NA	NA	NA
TR29966|c4_g3_i2	144.25	627.911	2.12199	0.0372895	0.788318	No	PREDICTED: thioredoxin-like 3-1, chloroplastic isoform X1	Populus euphratica	NA	NA	NA	NA	NA
TR37001|c0_g4_i1	61.5183	267.758	2.12184	0.045819	0.815805	No	fructose-bisphosphate aldolase	Genlisea aurea	NA	glycolytic process[GO:0006096]	fructose-bisphosphate aldolase activity[GO:0004332]	NA	map00030:Pentose phosphate pathway(aldolase[ec:4.1.2.13]) ; map01130:Biosynthesis of antibiotics(aldolase[ec:4.1.2.13]) ; map00051:Fructose and mannose metabolism(aldolase[ec:4.1.2.13]) ; map00710:Carbon fixation in photosynthetic organisms(aldolase[ec:4.1.2.13]) ; map00010:Glycolysis / Gluconeogenesis(aldolase[ec:4.1.2.13]) ; map00680:Methane metabolism(aldolase[ec:4.1.2.13])
TR39729|c0_g3_i3	40.3051	175.362	2.12131	0.0514564	0.836417	No	PREDICTED: putative GDP-L-fucose synthase 2	Sesamum indicum	NA	NA	NA	NA	NA
TR43933|c0_g4_i2	40.3051	175.362	2.12131	0.0514564	0.836086	No	PREDICTED: protein SMG7L	Sesamum indicum	NA	NA	NA	NA	NA
TR30000|c0_g1_i1	1043.69	4540.57	2.12118	0.0768855	0.912232	No	hypothetical protein MIMGU_mgv1a012601mg	Mimulus guttatus	NA	metabolic process[GO:0008152]	N-acetyltransferase activity[GO:0008080]	NA	NA
TR36609|c3_g1_i1	364.867	1585.8	2.11977	0.0414071	0.799642	No	PREDICTED: non-specific lipid-transfer protein 2-like	Sesamum indicum	NA	lipid transport[GO:0006869]	lipid binding[GO:0008289]	NA	NA
TR30051|c0_g4_i1	19.0919	82.9672	2.11958	0.0441586	0.809397	No	PREDICTED: HVA22-like protein f	Sesamum indicum	NA	NA	NA	NA	NA
TR33176|c0_g2_i8	19.0919	82.9672	2.11958	0.0441586	0.809759	No	PREDICTED: glutathione transferase GST 23-like	Sesamum indicum	NA	NA	NA	NA	NA
TR39438|c0_g1_i2	19.0919	82.9672	2.11958	0.0441586	0.81012	No	PREDICTED: adenylosuccinate lyase-like	Sesamum indicum	NA	NA	NA	NA	NA
TR42694|c0_g1_i1	19.0919	82.9672	2.11958	0.0441586	0.809036	No	hypothetical protein MIMGU_mgv1a003826mg	Mimulus guttatus	NA	NA	NA	NA	NA
TR33932|c1_g1_i1	152.735	663.738	2.11958	0.0372439	0.788166	No	PREDICTED: serine carboxypeptidase-like 50	Sesamum indicum	NA	NA	NA	NA	NA
TR31943|c1_g2_i1	163.342	708.992	2.11788	0.0371611	0.78926	No	unnamed protein product	Coffea canephora	NA	NA	NA	NA	NA
TR41621|c1_g1_i1	89.0955	386.552	2.11724	0.0418621	0.799037	No	PREDICTED: dnaJ homolog 1, mitochondrial-like	Sesamum indicum	NA	NA	NA	NA	NA
TR37552|c0_g1_i1	16.9706	73.5391	2.11548	0.0396608	0.801726	No	PREDICTED: CRS2-associated factor 2, chloroplastic	Sesamum indicum	NA	NA	NA	NA	NA
TR39106|c1_g2_i2	16.9706	73.5391	2.11548	0.0396608	0.802121	No	hypothetical protein MIMGU_mgv1a009055mg	Mimulus guttatus	NA	protein demethylation[GO:0006482]	carboxylic ester hydrolase activity[GO:0052689]	NA	map00983:Drug metabolism - other enzymes(ali-esterase[ec:3.1.1.1])
TR42747|c1_g1_i2	50.9117	220.617	2.11548	0.0495961	0.828471	No	PREDICTED: two-component response regulator-like APRR1 isoform X2	Sesamum indicum	NA	NA	NA	NA	NA
TR40035|c0_g1_i3	118.794	514.774	2.11548	0.0391548	0.799365	No	PREDICTED: uncharacterized protein LOC105177096 isoform X4	Sesamum indicum	NA	NA	NA	NA	NA
TR3700|c0_g2_i4	82.7315	358.267	2.11453	0.0429073	0.799665	No	hypothetical protein MIMGU_mgv11b012208mg	Mimulus guttatus	NA	electron transport chain[GO:0022900]	metal ion binding[GO:0046872] ; electron carrier activity[GO:0009055] ; 2 iron, 2 sulfur cluster binding[GO:0051537]	NA	NA
TR40019|c0_g2_i2	82.7315	358.267	2.11453	0.0429073	0.799302	No	NA	NA	NA	NA	NA	NA	NA
TR32759|c1_g3_i2	65.7609	284.728	2.11428	0.0455621	0.815828	No	PREDICTED: uncharacterized protein LOC105159695 isoform X2	Sesamum indicum	NA	NA	NA	NA	NA
TR31853|c0_g1_i1	114.551	495.918	2.11411	0.0395991	0.802058	No	PREDICTED: universal stress protein A-like protein	Sesamum indicum	NA	NA	NA	NA	NA
TR42331|c0_g4_i9	48.7904	211.189	2.11387	0.050402	0.826471	No	PREDICTED: uncharacterized protein LOC105167066	Sesamum indicum	NA	NA	NA	NA	NA
TR40674|c0_g3_i3	273.65	1184.17	2.11347	0.0386025	0.796401	No	PREDICTED: pentatricopeptide repeat-containing protein At2g42920, chloroplastic	Sesamum indicum	NA	NA	NA	NA	NA
TR37068|c0_g5_i2	31.8198	137.65	2.11301	0.0538195	0.835168	No	PREDICTED: uncharacterized protein LOC105170375	Sesamum indicum	NA	NA	NA	NA	NA
TR37171|c3_g6_i1	31.8198	137.65	2.11301	0.0538195	0.8358	No	NA	NA	NA	NA	NA	NA	NA
TR43627|c0_g15_i1	31.8198	137.65	2.11301	0.0538195	0.835484	No	NA	NA	NA	NA	NA	NA	NA
TR36628|c1_g1_i6	123.037	531.744	2.11165	0.0392115	0.800124	No	chloroplast tocopherol cyclase	Sesamum indicum	NA	metabolic process[GO:0008152]	tocopherol cyclase activity[GO:0009976]	NA	NA
TR33586|c0_g1_i4	135.765	586.427	2.11085	0.038587	0.796481	No	PREDICTED: uncharacterized protein LOC105168449	Sesamum indicum	NA	NA	NA	NA	NA
TR21083|c0_g1_i1	14.8492	64.111	2.11018	0.0335698	0.775106	No	hypothetical protein MIMGU_mgv1a0019611mg, partial	Mimulus guttatus	NA	NA	NA	NA	NA
TR36096|c0_g2_i2	14.8492	64.111	2.11018	0.0335698	0.77467	No	PREDICTED: IAA-amino acid hydrolase ILR1-like 2	Sesamum indicum	NA	NA	NA	NA	NA
TR42169|c0_g1_i1	14.8492	64.111	2.11018	0.0335698	0.775542	No	PREDICTED: MLO-like protein 1 isoform X3	Sesamum indicum	NA	NA	NA	NA	NA
TR7759|c1_g1_i1	14.8492	64.111	2.11018	0.0335698	0.775978	No	hypothetical protein MIMGU_mgv1a014037mg	Mimulus guttatus	NA	ATP synthesis coupled proton transport[GO:0015986]	proton-transporting ATPase activity, rotational mechanism[GO:0046961] ; proton-transporting ATP synthase activity, rotational mechanism[GO:0046933]	proton-transporting ATP synthase complex, catalytic core F(1)[GO:0045261]	NA
TR31101|c0_g1_i3	116.673	503.46	2.10941	0.0398647	0.803475	No	PREDICTED: fatty acyl-CoA reductase 3-like	Sesamum indicum	NA	NA	NA	NA	NA
TR3786|c0_g1_i12	101.823	439.349	2.1093	0.0411992	0.799007	No	PREDICTED: nucleolin 1-like	Sesamum indicum	NA	NA	NA	NA	NA
TR36690|c0_g1_i2	1321.58	5702.11	2.10923	0.0931772	0.944325	No	PREDICTED: probable carotenoid cleavage dioxygenase 4, chloroplastic isoform X1	Erythranthe guttatus	NA	NA	NA	NA	NA
TR33439|c0_g4_i1	1875.25	8083.64	2.10793	0.122959	0.993444	No	PREDICTED: chlorophyll a-b binding protein of LHCII type 1-like	Glycine max	NA	response to light stimulus[GO:0009416] ; protein-chromophore linkage[GO:0018298] ; photosynthesis, light harvesting in photosystem I[GO:0009768]	chlorophyll binding[GO:0016168] ; pigment binding[GO:0031409]	integral component of membrane[GO:0016021] ; chloroplast envelope[GO:0009941] ; chloroplast thylakoid membrane[GO:0009535] ; photosystem II[GO:0009523] ; plastoglobule[GO:0010287]	NA
TR38073|c1_g2_i10	27.5772	118.794	2.10692	0.0543161	0.83624	No	PREDICTED: 3-ketoacyl-CoA synthase 1	Sesamum indicum	NA	NA	NA	NA	NA
TR38705|c0_g1_i2	27.5772	118.794	2.10692	0.0543161	0.836553	No	PREDICTED: probable purine permease 11 isoform X1	Sesamum indicum	NA	NA	NA	NA	NA
TR38084|c1_g2_i1	40.3051	173.477	2.10571	0.0531019	0.83316	No	deficiens H68 homologue	Misopates orontium	NA	regulation of transcription, DNA-templated[GO:0006355] ; transcription, DNA-templated[GO:0006351]	transcription factor activity, sequence-specific DNA binding[GO:0003700] ; DNA binding[GO:0003677] ; protein dimerization activity[GO:0046983]	nucleus[GO:0005634]	NA
TR2385|c0_g1_i4	388.202	1670.66	2.10554	0.0436059	0.804291	No	PREDICTED: UPF0047 protein C4A8.02c	Sesamum indicum	NA	NA	NA	NA	NA
TR37824|c0_g2_i1	388.202	1670.66	2.10554	0.0436059	0.804652	No	PREDICTED: cytochrome c-type biogenesis ccda-like chloroplastic protein	Sesamum indicum	NA	NA	NA	NA	NA
TR29413|c0_g1_i1	53.033	228.16	2.10508	0.0500747	0.826052	No	PREDICTED: protein ASPARTIC PROTEASE IN GUARD CELL 2-like	Sesamum indicum	NA	NA	NA	NA	NA
TR34926|c0_g1_i3	1052.17	4525.48	2.1047	0.0789727	0.918947	No	hypothetical protein MIMGU_mgv1a012131mg	Mimulus guttatus	NA	cellular iron ion homeostasis[GO:0006879] ; iron ion transport[GO:0006826] ; oxidation-reduction process[GO:0055114]	ferric iron binding[GO:0008199] ; ferroxidase activity[GO:0004322]	cell[GO:0005623]	map00860:Porphyrin and chlorophyll metabolism(ceruloplasmin[ec:1.16.3.1])
TR43935|c1_g1_i1	313.955	1350.1	2.10444	0.0406292	0.796985	No	PREDICTED: putative phospholipid-transporting ATPase 9	Sesamum indicum	NA	NA	NA	NA	NA
TR38495|c0_g9_i1	12.7279	54.6829	2.10309	0.0254987	0.736556	No	PREDICTED: protein TIC 21, chloroplastic	Sesamum indicum	NA	NA	NA	NA	NA
TR39439|c0_g2_i1	12.7279	54.6829	2.10309	0.0254987	0.737593	No	NA	NA	NA	NA	NA	NA	NA
TR42445|c0_g5_i1	12.7279	54.6829	2.10309	0.0254987	0.737074	No	NA	NA	NA	NA	NA	NA	NA
TR34184|c1_g6_i6	25.4558	109.366	2.10309	0.0538056	0.8359	No	NA	NA	NA	NA	NA	NA	NA
TR33133|c0_g10_i1	38.1838	164.049	2.10309	0.0537433	0.836197	No	NA	NA	NA	NA	NA	NA	NA
TR34720|c0_g1_i2	114.551	492.146	2.10309	0.0406172	0.79713	No	NA	NA	NA	NA	NA	NA	NA
TR29158|c0_g1_i1	305.47	1310.5	2.10102	0.0406136	0.79744	No	hypothetical protein EUGRSUZ_J00924, partial	Eucalyptus grandis	NA	NA	NA	NA	NA
TR31969|c2_g6_i2	48.7904	209.304	2.10093	0.0518159	0.835647	No	PREDICTED: abscisic acid receptor PYR1	Populus euphratica	NA	NA	NA	NA	NA
TR43627|c0_g8_i2	178.191	763.675	2.09954	0.0385377	0.796265	No	PREDICTED: LOW QUALITY PROTEIN: probable methyltransferase PMT14, partial	Erythranthe guttatus	NA	NA	NA	NA	NA
TR34326|c0_g3_i2	201.525	863.613	2.09942	0.038504	0.796772	No	hypothetical protein MIMGU_mgv1a012202mg	Mimulus guttatus	NA	NA	protein domain specific binding[GO:0019904]	NA	NA
TR33945|c0_g4_i3	23.3345	99.9378	2.09856	0.0523683	0.834723	No	hypothetical protein MIMGU_mgv1a012400mg	Mimulus guttatus	NA	NA	NA	integral component of membrane[GO:0016021]	NA
TR35865|c0_g2_i1	23.3345	99.9378	2.09856	0.0523683	0.834399	No	PREDICTED: IAA-amino acid hydrolase ILR1-like 4-like	Solanum tuberosum	NA	NA	NA	NA	NA
TR41907|c0_g3_i3	23.3345	99.9378	2.09856	0.0523683	0.835371	No	NA	NA	NA	NA	NA	NA	NA
TR42612|c2_g2_i3	23.3345	99.9378	2.09856	0.0523683	0.835047	No	hypothetical protein JCGZ_10741	Jatropha curcas	NA	protein phosphorylation[GO:0006468]	protein kinase activity[GO:0004672] ; calcium ion binding[GO:0005509] ; ATP binding[GO:0005524]	NA	NA
TR36635|c0_g4_i2	70.0036	299.813	2.09856	0.046297	0.816529	No	PREDICTED: patatin-3-Kuras 1-like	Solanum tuberosum	NA	NA	NA	NA	NA
TR38250|c0_g2_i1	103.945	445.006	2.09801	0.0420624	0.798777	No	PREDICTED: uncharacterized protein LOC105175671	Sesamum indicum	NA	NA	NA	NA	NA
TR42863|c2_g4_i2	33.9411	145.193	2.09686	0.0552437	0.843565	No	PREDICTED: serine/threonine-protein kinase STN8, chloroplastic	Sesamum indicum	NA	NA	NA	NA	NA
TR43390|c1_g1_i9	33.9411	145.193	2.09686	0.0552437	0.843879	No	PREDICTED: protein disulfide-isomerase-like	Sesamum indicum	NA	NA	NA	NA	NA
TR31967|c0_g1_i1	78.4889	335.64	2.09636	0.0452437	0.81403	No	PREDICTED: purine permease 3-like, partial	Erythranthe guttatus	NA	NA	NA	NA	NA
TR8274|c0_g1_i1	55.1543	235.702	2.09542	0.0504835	0.827148	No	NA	NA	NA	NA	NA	NA	NA
TR43208|c4_g2_i1	10.6066	45.2548	2.09311	0.0159763	0.656899	No	NA	NA	NA	NA	NA	NA	NA
TR23657|c0_g1_i1	21.2132	90.5097	2.09311	0.0498608	0.829183	No	hypothetical protein MIMGU_mgv1a000900mg	Mimulus guttatus	NA	NA	NA	NA	NA
TR32849|c1_g2_i3	21.2132	90.5097	2.09311	0.0498608	0.829519	No	hypothetical protein M569_05971, partial	Genlisea aurea	NA	translation[GO:0006412]	structural constituent of ribosome[GO:0003735] ; RNA binding[GO:0003723] ; transferase activity[GO:0016740]	large ribosomal subunit[GO:0015934]	NA
TR28910|c1_g2_i1	31.8198	135.765	2.09311	0.0559603	0.849454	No	hypothetical protein MIMGU_mgv1a017777mg, partial	Mimulus guttatus	NA	NA	NA	NA	NA
TR7922|c0_g1_i3	53.033	226.274	2.09311	0.0513991	0.836146	No	PREDICTED: scarecrow-like protein 32	Sesamum indicum	NA	NA	NA	NA	NA
TR33299|c3_g4_i4	63.6396	271.529	2.09311	0.0483014	0.82359	No	PREDICTED: uncharacterized protein LOC105169883, partial	Sesamum indicum	NA	NA	NA	NA	NA
TR39579|c2_g4_i1	74.2462	316.784	2.09311	0.0461383	0.816886	No	hypothetical protein MIMGU_mgv1a010108mg	Mimulus guttatus	NA	protein phosphorylation[GO:0006468]	protein kinase activity[GO:0004672] ; ATP binding[GO:0005524]	NA	NA
TR33279|c0_g1_i1	197.283	840.986	2.09182	0.039145	0.799562	No	PREDICTED: carboxyl-terminal-processing peptidase 3, chloroplastic	Sesamum indicum	NA	NA	NA	NA	NA
TR32941|c1_g1_i1	413.657	1761.17	2.09002	0.0461203	0.816921	No	PREDICTED: transcription factor MYB1R1	Sesamum indicum	NA	NA	NA	NA	NA
TR43689|c0_g7_i6	40.3051	171.591	2.08994	0.0548141	0.839501	No	PREDICTED: pentatricopeptide repeat-containing protein At5g42310, mitochondrial	Sesamum indicum	NA	NA	NA	NA	NA
TR31330|c3_g4_i1	161.22	686.365	2.08994	0.03963	0.801893	No	NA	NA	NA	NA	NA	NA	NA
TR35564|c1_g1_i2	29.6985	126.336	2.08881	0.0564996	0.84979	No	PREDICTED: acetylornithine deacetylase	Sesamum indicum	NA	NA	NA	NA	NA
TR41093|c0_g1_i1	156.978	667.509	2.08823	0.0398826	0.802655	No	PREDICTED: plant intracellular Ras-group-related LRR protein 5-like	Sesamum indicum	NA	NA	NA	NA	NA
TR40369|c1_g5_i3	48.7904	207.418	2.08787	0.0532746	0.833323	No	PREDICTED: delta(8)-fatty-acid desaturase 2-like	Sesamum indicum	NA	NA	NA	NA	NA
TR26919|c0_g1_i1	135.765	576.999	2.08746	0.0407071	0.795473	No	PREDICTED: uncharacterized protein LOC105170805	Sesamum indicum	NA	NA	NA	NA	NA
TR40127|c2_g1_i6	86.9741	369.581	2.08723	0.04507	0.815907	No	NA	NA	NA	NA	NA	NA	NA
TR34986|c3_g2_i2	19.0919	81.0816	2.08641	0.0465202	0.815215	No	PREDICTED: FAD synthase isoform X2	Sesamum indicum	NA	NA	NA	NA	NA
TR8187|c0_g8_i1	19.0919	81.0816	2.08641	0.0465202	0.815563	No	PREDICTED: probable beta-1,3-galactosyltransferase 2	Sesamum indicum	NA	NA	NA	NA	NA
TR35363|c0_g1_i1	38.1838	162.163	2.08641	0.0555799	0.847753	No	PREDICTED: uncharacterized protein LOC105163892	Sesamum indicum	NA	NA	NA	NA	NA
TR44336|c2_g4_i3	57.2756	243.245	2.08641	0.0508367	0.830946	No	NA	NA	NA	NA	NA	NA	NA
TR38904|c0_g1_i1	207.889	882.469	2.08573	0.0397178	0.802482	No	PREDICTED: homeobox protein BEL1 homolog	Sesamum indicum	NA	NA	NA	NA	NA
TR32120|c0_g1_i4	131.522	558.143	2.08533	0.041126	0.798719	No	PREDICTED: protein MEMO1 isoform X1	Sesamum indicum	NA	NA	NA	NA	NA
TR32022|c0_g1_i5	129.401	548.715	2.08421	0.0413529	0.799723	No	PREDICTED: uncharacterized protein LOC105164004	Sesamum indicum	NA	NA	NA	NA	NA
TR33763|c0_g1_i3	27.5772	116.908	2.08383	0.0566779	0.850293	No	NA	NA	NA	NA	NA	NA	NA
TR38863|c0_g1_i2	27.5772	116.908	2.08383	0.0566779	0.850603	No	PREDICTED: putative fructokinase-5	Malus domestica	NA	NA	NA	NA	NA
TR35783|c0_g1_i2	523.966	2219.37	2.08261	0.0525795	0.832918	No	NA	NA	NA	NA	NA	NA	NA
TR37927|c1_g2_i19	36.0624	152.735	2.08246	0.0564442	0.851765	No	hypothetical protein CISIN_1g041662mg, partial	Citrus sinensis	NA	NA	NA	NA	NA
TR32982|c0_g2_i1	277.893	1176.63	2.08205	0.041344	0.799928	No	PREDICTED: uncharacterized protein LOC105174078	Sesamum indicum	NA	NA	NA	NA	NA
TR23511|c0_g2_i1	97.5807	412.95	2.0813	0.0443901	0.810746	No	PREDICTED: uncharacterized protein LOC105178584	Sesamum indicum	NA	NA	NA	NA	NA
TR33855|c0_g1_i3	1436.13	6077.35	2.08125	0.102447	0.956171	No	PREDICTED: uncharacterized protein LOC105170167 isoform X1	Sesamum indicum	NA	NA	NA	NA	NA
TR3795|c0_g1_i1	176.07	744.819	2.08074	0.0402164	0.796878	No	hypothetical protein MIMGU_mgv1a000496mg	Mimulus guttatus	NA	intracellular protein transport[GO:0006886]	Ran GTPase binding[GO:0008536]	intracellular[GO:0005622]	NA
TR17767|c0_g1_i1	492.146	2081.72	2.08062	0.0510456	0.832373	No	hypothetical protein MIMGU_mgv1a014269mg	Mimulus guttatus	NA	oxidation-reduction process[GO:0055114]	oxidoreductase activity[GO:0016491]	NA	NA
TR32694|c3_g1_i6	1151.88	4866.78	2.07898	0.0870588	0.94106	No	PREDICTED: photosystem I reaction center subunit III, chloroplastic-like	Solanum lycopersicum	NA	photosynthesis[GO:0015979]	NA	integral component of membrane[GO:0016021] ; photosystem I reaction center[GO:0009538]	NA
TR38298|c0_g3_i2	16.9706	71.6535	2.078	0.0419457	0.799148	No	PREDICTED: ethylene-responsive transcription factor ERF118-like	Sesamum indicum	NA	NA	NA	NA	NA
TR43933|c0_g5_i1	16.9706	71.6535	2.078	0.0419457	0.799519	No	PREDICTED: protein SMG7L	Sesamum indicum	NA	NA	NA	NA	NA
TR31194|c1_g6_i1	25.4558	107.48	2.078	0.0562328	0.851076	No	hypothetical protein M569_03153	Genlisea aurea	NA	glycine decarboxylation via glycine cleavage system[GO:0019464]	NA	glycine cleavage complex[GO:0005960]	NA
TR41915|c0_g2_i1	25.4558	107.48	2.078	0.0562328	0.850763	No	PREDICTED: ultraviolet-B receptor UVR8 isoform X2	Sesamum indicum	NA	NA	NA	NA	NA
TR31091|c0_g4_i5	50.9117	214.96	2.078	0.0537684	0.836271	No	PREDICTED: protein MODIFIER OF SNC1 1, partial	Sesamum indicum	NA	NA	NA	NA	NA
TR38592|c1_g1_i1	50.9117	214.96	2.078	0.0537684	0.835638	No	PREDICTED: dnaJ homolog 1, mitochondrial-like	Erythranthe guttatus	NA	NA	NA	NA	NA
TR39106|c1_g4_i5	50.9117	214.96	2.078	0.0537684	0.835955	No	PREDICTED: protein phosphatase methylesterase 1-like	Nicotiana sylvestris	NA	NA	NA	NA	NA
TR26416|c1_g1_i2	5371.18	22663.2	2.07704	0.276194	1.09868	No	PREDICTED: light-regulated protein-like	Sesamum indicum	NA	NA	NA	NA	NA
TR33676|c0_g1_i5	774.282	3262.12	2.07488	0.0668612	0.884221	No	PREDICTED: rhodanese-like domain-containing protein 14, chloroplastic	Sesamum indicum	NA	NA	NA	NA	NA
TR41842|c0_g5_i1	235.467	991.835	2.07458	0.0410199	0.797413	No	PREDICTED: gamma aminobutyrate transaminase 3, chloroplastic isoform X1	Sesamum indicum	NA	NA	NA	NA	NA
TR43170|c0_g2_i1	258.801	1089.89	2.07426	0.0415211	0.800337	No	PREDICTED: polyadenylate-binding protein 2-like	Sesamum indicum	NA	NA	NA	NA	NA
TR26669|c0_g2_i2	31.8198	133.879	2.07293	0.0582003	0.851973	No	PREDICTED: ferrochelatase-2, chloroplastic	Erythranthe guttatus	NA	NA	NA	NA	NA
TR44346|c1_g1_i2	31.8198	133.879	2.07293	0.0582003	0.851669	No	PREDICTED: uncharacterized protein LOC105159649	Sesamum indicum	NA	NA	NA	NA	NA
TR32039|c0_g1_i1	173.948	731.62	2.07244	0.0409973	0.799242	No	PREDICTED: pleiotropic drug resistance protein 2-like	Sesamum indicum	NA	NA	NA	NA	NA
TR34863|c0_g5_i1	142.128	597.741	2.07232	0.0418436	0.799426	No	PREDICTED: uncharacterized protein LOC105953819	Erythranthe guttatus	NA	NA	NA	NA	NA
TR40442|c1_g2_i1	23.3345	98.0521	2.07108	0.0547992	0.839586	No	lipoxygenase	Salvia miltiorrhiza	NA	oxylipin biosynthetic process[GO:0031408] ; oxidation-reduction process[GO:0055114]	metal ion binding[GO:0046872] ; oxidoreductase activity, acting on single donors with incorporation of molecular oxygen, incorporation of two atoms of oxygen[GO:0016702]	NA	NA
TR30268|c0_g1_i1	46.669	196.104	2.07108	0.0557724	0.848798	No	NA	NA	NA	NA	NA	NA	NA
TR43164|c4_g2_i1	210.011	882.469	2.07108	0.0410282	0.797196	No	NA	NA	NA	NA	NA	NA	NA
TR42959|c0_g2_i4	237.588	997.492	2.06984	0.0414754	0.800584	No	NA	NA	NA	NA	NA	NA	NA
TR38452|c0_g1_i2	137.886	578.885	2.0698	0.0422728	0.799078	No	PREDICTED: glucan endo-1,3-beta-glucosidase 14-like	Sesamum indicum	NA	NA	NA	NA	NA
TR29217|c0_g1_i1	112.43	471.405	2.06794	0.0442124	0.80894	No	Fructose-bisphosphate aldolase cytoplasmic isozyme	Morus notabilis	NA	glycolytic process[GO:0006096]	fructose-bisphosphate aldolase activity[GO:0004332]	NA	map00030:Pentose phosphate pathway(aldolase[ec:4.1.2.13]) ; map01130:Biosynthesis of antibiotics(aldolase[ec:4.1.2.13]) ; map00051:Fructose and mannose metabolism(aldolase[ec:4.1.2.13]) ; map00710:Carbon fixation in photosynthetic organisms(aldolase[ec:4.1.2.13]) ; map00010:Glycolysis / Gluconeogenesis(aldolase[ec:4.1.2.13]) ; map00680:Methane metabolism(aldolase[ec:4.1.2.13])
TR28750|c1_g1_i2	2015.25	8447.57	2.06757	0.134705	1.00584	No	hypothetical protein MIMGU_mgv1a013205mg	Mimulus guttatus	NA	photosynthesis[GO:0015979]	calcium ion binding[GO:0005509]	photosystem II oxygen evolving complex[GO:0009654] ; extrinsic component of membrane[GO:0019898]	NA
TR31966|c0_g4_i1	634.275	2658.72	2.06755	0.0599467	0.859467	No	hypothetical protein MIMGU_mgv1a010248mg	Mimulus guttatus	NA	metabolic process[GO:0008152]	molybdenum ion binding[GO:0030151] ; pyridoxal phosphate binding[GO:0030170] ; catalytic activity[GO:0003824]	NA	NA
TR35273|c1_g4_i1	14.8492	62.2254	2.06711	0.035622	0.784143	No	PREDICTED: uncharacterized protein LOC105174380 isoform X2	Sesamum indicum	NA	NA	NA	NA	NA
TR39056|c0_g4_i1	14.8492	62.2254	2.06711	0.035622	0.783723	No	PREDICTED: DNA damage-inducible protein 1	Sesamum indicum	NA	NA	NA	NA	NA
TR32389|c1_g3_i1	59.397	248.902	2.06711	0.0523896	0.834415	No	PREDICTED: uncharacterized protein LOC105173480	Sesamum indicum	NA	NA	NA	NA	NA
TR41685|c0_g1_i3	80.6102	337.526	2.06596	0.0481039	0.822614	No	PREDICTED: uncharacterized protein LOC105169651	Sesamum indicum	NA	NA	NA	NA	NA
TR35723|c0_g3_i1	116.673	488.375	2.06552	0.0440839	0.810922	No	hypothetical protein MIMGU_mgv1a008760mg	Mimulus guttatus	NA	NA	NA	NA	NA
TR44584|c0_g3_i1	78.4889	328.098	2.06357	0.0486411	0.824931	No	PREDICTED: SUMO-activating enzyme subunit 2	Sesamum indicum	NA	NA	NA	NA	NA
TR28101|c0_g1_i4	21.2132	88.624	2.06274	0.0523609	0.835902	No	NA	NA	NA	NA	NA	NA	NA
TR33604|c0_g2_i2	106.066	443.12	2.06274	0.04536	0.81505	No	Uncharacterized protein TCM_042505	Theobroma cacao	NA	entrainment of circadian clock[GO:0009649] ; positive regulation of circadian rhythm[GO:0042753] ; photoperiodism, flowering[GO:0048573] ; regulation of flower development[GO:0009909] ; response to red light[GO:0010114]	protein homodimerization activity[GO:0042803]	NA	NA
TR41663|c2_g4_i2	233.345	974.865	2.06274	0.0420436	0.79879	No	AT1G55490	Arabidopsis thaliana	NA	NA	NA	NA	NA
TR34515|c1_g1_i2	27.5772	115.023	2.06037	0.0591566	0.855604	No	PREDICTED: protein CutA, chloroplastic	Sesamum indicum	NA	NA	NA	NA	NA
TR7862|c0_g4_i4	27.5772	115.023	2.06037	0.0591566	0.855303	No	unnamed protein product	Coffea canephora	NA	proteolysis[GO:0006508]	aspartic-type endopeptidase activity[GO:0004190]	NA	NA
TR7470|c0_g1_i1	233.345	972.979	2.05994	0.042297	0.798433	No	hypothetical protein MIMGU_mgv1a016652mg	Mimulus guttatus	NA	NA	NA	NA	NA
TR2781|c0_g1_i1	538.815	2245.77	2.05935	0.0555189	0.847452	No	PREDICTED: protein TIC 20-v, chloroplastic	Sesamum indicum	NA	NA	NA	NA	NA
TR32522|c0_g3_i1	33.9411	141.421	2.05889	0.0595464	0.859125	No	unnamed protein product	Coffea canephora	NA	peptidyl-tyrosine dephosphorylation[GO:0035335]	protein tyrosine phosphatase activity[GO:0004725]	NA	NA
TR23408|c0_g1_i2	154.856	644.881	2.0581	0.0427484	0.800699	No	PREDICTED: cytochrome P450 CYP82D47-like	Erythranthe guttatus	NA	NA	NA	NA	NA
TR26144|c0_g1_i1	2462.85	10250.2	2.05725	0.157814	1.03486	No	chloroplast pigment-binding protein CP24	Nicotiana tabacum	NA	photosynthesis, light harvesting[GO:0009765] ; protein-chromophore linkage[GO:0018298]	chlorophyll binding[GO:0016168]	photosystem II[GO:0009523] ; integral component of membrane[GO:0016021] ; chloroplast[GO:0009507]	NA
TR30202|c0_g5_i10	46.669	194.219	2.05714	0.0574023	0.849372	No	translation elongation factor 1, partial	Ziziphus jujuba	NA	translational elongation[GO:0006414]	translation elongation factor activity[GO:0003746] ; GTP binding[GO:0005525] ; GTPase activity[GO:0003924]	NA	NA
TR38038|c0_g2_i4	46.669	194.219	2.05714	0.0574023	0.849678	No	PREDICTED: uncharacterized protein LOC105163785	Sesamum indicum	NA	NA	NA	NA	NA
TR35515|c0_g1_i2	536.694	2232.57	2.05653	0.0556677	0.848148	No	PREDICTED: probable plastid-lipid-associated protein 12, chloroplastic	Sesamum indicum	NA	NA	NA	NA	NA
TR36817|c0_g5_i4	59.397	247.016	2.05614	0.0536676	0.835968	No	NA	NA	NA	NA	NA	NA	NA
TR31605|c0_g1_i1	473.054	1966.7	2.0557	0.0522635	0.835646	No	hypothetical protein MIMGU_mgv1a014595mg	Mimulus guttatus	NA	NA	NA	NA	NA
TR42531|c0_g1_i3	116.673	484.604	2.05434	0.0452199	0.813958	No	PREDICTED: alpha-1,4 glucan phosphorylase L-2 isozyme, chloroplastic/amyloplastic-like	Sesamum indicum	NA	NA	NA	NA	NA
TR44022|c0_g3_i1	369.11	1533.01	2.05424	0.0471863	0.819199	No	PREDICTED: beta-galactosidase 10	Sesamum indicum	NA	NA	NA	NA	NA
TR42757|c2_g7_i1	12.7279	52.7973	2.05247	0.0270908	0.745334	No	PREDICTED: protein TRANSPARENT TESTA 12-like	Erythranthe guttatus	NA	NA	NA	NA	NA
TR2945|c0_g1_i1	19.0919	79.196	2.05247	0.0490539	0.825795	No	NA	NA	NA	NA	NA	NA	NA
TR36757|c1_g3_i4	25.4558	105.595	2.05247	0.0587838	0.855939	No	PREDICTED: uncharacterized protein LOC105164444	Sesamum indicum	NA	NA	NA	NA	NA
TR30938|c0_g3_i1	205.768	852.299	2.05034	0.0429105	0.798999	No	PREDICTED: uncharacterized protein LOC105172976	Sesamum indicum	NA	NA	NA	NA	NA
TR37921|c0_g1_i1	303.349	1255.82	2.04958	0.0450228	0.815412	No	PREDICTED: fructose-1,6-bisphosphatase, chloroplastic-like	Sesamum indicum	NA	NA	NA	NA	NA
TR3622|c1_g1_i4	61.5183	254.558	2.04891	0.0538865	0.835577	No	unnamed protein product	Coffea canephora	NA	NA	NA	integral component of membrane[GO:0016021]	NA
TR37311|c0_g2_i4	55.1543	228.16	2.0485	0.0559104	0.849325	No	PREDICTED: protease Do-like 5, chloroplastic	Sesamum indicum	NA	NA	NA	NA	NA
TR33776|c2_g3_i5	110.309	456.32	2.0485	0.0464134	0.816129	No	PREDICTED: histone H1-like	Sesamum indicum	NA	NA	NA	NA	NA
TR41799|c0_g2_i1	36.0624	148.964	2.04639	0.0606414	0.863698	No	hypothetical protein MIMGU_mgv1a003679mg	Mimulus guttatus	NA	NA	NA	NA	NA
TR19108|c0_g1_i1	65.7609	271.529	2.0458	0.0530727	0.833658	No	methionine synthase	Plantago major	NA	methionine biosynthetic process[GO:0009086] ; methylation[GO:0032259]	zinc ion binding[GO:0008270] ; 5-methyltetrahydropteroyltriglutamate-homocysteine S-methyltransferase activity[GO:0003871]	NA	map00450:Selenocompound metabolism(S-methyltransferase[ec:2.1.1.14]) ; map00270:Cysteine and methionine metabolism(S-methyltransferase[ec:2.1.1.14])
TR37073|c0_g3_i1	29.6985	122.565	2.04509	0.0613515	0.868692	No	PREDICTED: probable phytol kinase 3, chloroplastic	Sesamum indicum	NA	NA	NA	NA	NA
TR36669|c0_g1_i2	59.397	245.13	2.04509	0.0549815	0.841751	No	hypothetical protein MIMGU_mgv1a010311mg	Mimulus guttatus	NA	NA	NA	NA	NA
TR33227|c1_g1_i5	229.103	944.695	2.04385	0.043724	0.806108	No	PREDICTED: uncharacterized protein LOC105169796	Sesamum indicum	NA	NA	NA	NA	NA
TR33168|c0_g1_i3	23.3345	96.1665	2.04307	0.0573637	0.85064	No	PREDICTED: 7-deoxyloganetic acid glucosyltransferase-like	Sesamum indicum	NA	NA	NA	NA	NA
TR2458|c0_g1_i1	46.669	192.333	2.04307	0.0590855	0.854878	No	PREDICTED: uncharacterized protein LOC105160688	Sesamum indicum	NA	NA	NA	NA	NA
TR38942|c1_g1_i8	70.0036	288.5	2.04307	0.0523671	0.835676	No	cytochrome P450 CYP714G13	Salvia miltiorrhiza	NA	oxidation-reduction process[GO:0055114]	heme binding[GO:0020037] ; oxidoreductase activity, acting on paired donors, with incorporation or reduction of molecular oxygen[GO:0016705] ; monooxygenase activity[GO:0004497] ; iron ion binding[GO:0005506]	integral component of membrane[GO:0016021]	NA
TR35412|c0_g2_i3	466.69	1919.56	2.04024	0.0533567	0.833021	No	hypothetical protein MIMGU_mgv1a011276mg	Mimulus guttatus	NA	NA	NA	membrane[GO:0016020]	NA
TR2956|c0_g3_i1	16.9706	69.7679	2.03953	0.0444131	0.810086	No	PREDICTED: dnaJ homolog 1, mitochondrial-like, partial	Sesamum indicum	NA	NA	NA	NA	NA
TR30597|c1_g5_i1	16.9706	69.7679	2.03953	0.0444131	0.809726	No	RS23_EUPESRecName: Full=40S ribosomal protein S23	Euphorbia esula	NA	translation[GO:0006412]	structural constituent of ribosome[GO:0003735]	small ribosomal subunit[GO:0015935]	NA
TR33306|c0_g2_i1	16.9706	69.7679	2.03953	0.0444131	0.810806	No	hypothetical protein MIMGU_mgv1a013476mg	Mimulus guttatus	NA	NA	NA	NA	NA
TR39702|c0_g1_i3	16.9706	69.7679	2.03953	0.0444131	0.810446	No	NA	NA	NA	NA	NA	NA	NA
TR43183|c2_g6_i4	16.9706	69.7679	2.03953	0.0444131	0.809367	No	PREDICTED: F-box/LRR-repeat protein 14	Sesamum indicum	NA	NA	NA	NA	NA
TR27949|c0_g1_i1	50.9117	209.304	2.03953	0.05834	0.852195	No	PREDICTED: uncharacterized protein LOC105160234 isoform X2	Sesamum indicum	NA	NA	NA	NA	NA
TR43910|c2_g5_i1	449.72	1847.91	2.03879	0.0525747	0.833163	No	hypothetical protein MIMGU_mgv1a000648mg	Mimulus guttatus	NA	glycine catabolic process[GO:0006546] ; oxidation-reduction process[GO:0055114]	glycine dehydrogenase (decarboxylating) activity[GO:0004375]	NA	map00260:Glycine, serine and threonine metabolism(dehydrogenase (aminomethyl-transferring)[ec:1.4.4.2])
TR34225|c0_g1_i2	1221.88	5015.74	2.03736	0.0954972	0.943851	No	PREDICTED: uncharacterized protein LOC105177106	Sesamum indicum	NA	NA	NA	NA	NA
TR23317|c0_g2_i1	55.1543	226.274	2.03653	0.0573687	0.850407	No	hypothetical protein MIMGU_mgv1a012117mg	Mimulus guttatus	NA	nucleoside metabolic process[GO:0009116] ; adenine salvage[GO:0006168]	adenine phosphoribosyltransferase activity[GO:0003999]	cytoplasm[GO:0005737]	map00230:Purine metabolism(phosphoribosyltransferase[ec:2.4.2.7])
TR39413|c0_g3_i1	76.3675	313.013	2.03519	0.0520623	0.835356	No	PREDICTED: uncharacterized protein LOC105168396	Sesamum indicum	NA	NA	NA	NA	NA
TR7675|c2_g2_i1	97.5807	399.751	2.03443	0.0493305	0.82605	No	PREDICTED: trihelix transcription factor GT-2-like	Sesamum indicum	NA	NA	NA	NA	NA
TR42225|c1_g1_i3	210.011	859.842	2.03361	0.0445245	0.810318	No	PREDICTED: cellulose synthase-like protein G3	Sesamum indicum	NA	NA	NA	NA	NA
TR41674|c0_g3_i3	218.496	893.783	2.03232	0.0447072	0.812563	No	PREDICTED: plastidic ATP/ADP-transporter-like	Sesamum indicum	NA	NA	NA	NA	NA
TR15230|c0_g1_i1	10.6066	43.3692	2.03171	0.0170514	0.669603	No	unknown	Lotus japonicus	NA	NA	GTP binding[GO:0005525]	NA	NA
TR29469|c2_g1_i2	21.2132	86.7384	2.03171	0.0550317	0.841892	No	PREDICTED: expansin-A6-like	Sesamum indicum	NA	NA	NA	NA	NA
TR42215|c0_g2_i1	21.2132	86.7384	2.03171	0.0550317	0.842206	No	PREDICTED: sodium/hydrogen exchanger 1-like	Sesamum indicum	NA	NA	NA	NA	NA
TR39374|c0_g6_i3	31.8198	130.108	2.03171	0.0629989	0.876903	No	unnamed protein product	Coffea canephora	NA	NA	NA	NA	NA
TR42786|c0_g3_i1	31.8198	130.108	2.03171	0.0629989	0.876606	No	PREDICTED: molybdenum cofactor sulfurase-like	Sesamum indicum	NA	NA	NA	NA	NA
TR7994|c0_g1_i6	84.8528	346.954	2.03171	0.0512812	0.834889	No	NA	NA	NA	NA	NA	NA	NA
TR2653|c2_g1_i4	625.79	2558.78	2.03171	0.0630146	0.876529	No	hypothetical protein MIMGU_mgv1a015294mg	Mimulus guttatus	NA	NA	iron ion binding[GO:0005506]	integral component of membrane[GO:0016021]	NA
TR36623|c0_g1_i1	57.2756	233.817	2.02938	0.0575684	0.850299	No	PREDICTED: biotin carboxyl carrier protein of acetyl-CoA carboxylase 1, chloroplastic isoform X1	Erythranthe guttatus	NA	NA	NA	NA	NA
TR28113|c0_g3_i1	103.945	424.264	2.02915	0.049168	0.826698	No	PREDICTED: thioredoxin M2, chloroplastic-like	Sesamum indicum	NA	NA	NA	NA	NA
TR40486|c0_g3_i6	46.669	190.447	2.02885	0.060824	0.864202	No	NA	NA	NA	NA	NA	NA	NA
TR37991|c0_g1_i6	93.3381	380.895	2.02885	0.0504806	0.82743	No	NA	NA	NA	NA	NA	NA	NA
TR29567|c0_g2_i1	82.7315	337.526	2.02849	0.0519332	0.836552	No	NA	NA	NA	NA	NA	NA	NA
TR34950|c0_g2_i1	82.7315	337.526	2.02849	0.0519332	0.836224	No	PREDICTED: uncharacterized protein LOC105156285	Sesamum indicum	NA	NA	NA	NA	NA
TR26534|c0_g1_i5	36.0624	147.078	2.02801	0.0628789	0.875827	No	PREDICTED: LOW QUALITY PROTEIN: threonine dehydratase biosynthetic, chloroplastic	Sesamum indicum	NA	NA	NA	NA	NA
TR3439|c0_g2_i3	180.312	735.391	2.02801	0.0451683	0.816249	No	PREDICTED: uncharacterized protein LOC105966158	Erythranthe guttatus	NA	NA	NA	NA	NA
TR32802|c1_g3_i4	97.5807	397.865	2.02761	0.0500874	0.825929	No	NA	NA	NA	NA	NA	NA	NA
TR31269|c0_g1_i3	613.062	2498.44	2.02693	0.0627925	0.875812	No	PREDICTED: uncharacterized protein LOC103438095	Malus domestica	NA	NA	NA	NA	NA
TR2416|c0_g2_i1	76.3675	311.127	2.02647	0.053062	0.833808	No	NA	NA	NA	NA	NA	NA	NA
TR29730|c1_g4_i1	167.584	682.594	2.02614	0.0455734	0.815674	No	PREDICTED: uncharacterized protein At2g27730, mitochondrial-like	Nelumbo nucifera	NA	NA	NA	NA	NA
TR39166|c0_g4_i3	80.6102	328.098	2.02509	0.0526097	0.833074	No	beta-D-glucan exohydrolase	Nicotiana tabacum	NA	carbohydrate metabolic process[GO:0005975]	hydrolase activity, hydrolyzing O-glycosyl compounds[GO:0004553]	NA	NA
TR38704|c1_g4_i3	114.551	465.748	2.02355	0.0486787	0.824887	No	NA	NA	NA	NA	NA	NA	NA
TR40364|c0_g3_i4	29.6985	120.68	2.02272	0.0639548	0.879481	No	PREDICTED: calcium-dependent protein kinase 10	Sesamum indicum	NA	NA	NA	NA	NA
TR37154|c0_g2_i4	44.5477	181.019	2.02272	0.0620162	0.869708	No	PREDICTED: protein TRIGALACTOSYLDIACYLGLYCEROL 1, chloroplastic-like	Sesamum indicum	NA	NA	NA	NA	NA
TR43435|c1_g5_i7	44.5477	181.019	2.02272	0.0620162	0.869412	No	PREDICTED: subtilisin-like protease SBT5.3	Nicotiana tomentosiformis	NA	NA	NA	NA	NA
TR39104|c0_g1_i5	78.4889	318.669	2.0215	0.0533129	0.832654	No	PREDICTED: dehydrogenase/reductase SDR family member on chromosome X-like isoform X1	Sesamum indicum	NA	NA	NA	NA	NA
TR30797|c0_g1_i1	1457.35	5915.18	2.02108	0.1105	0.972762	No	PREDICTED: GDSL esterase/lipase APG	Sesamum indicum	NA	NA	NA	NA	NA
TR33681|c0_g1_i9	48.7904	197.99	2.02076	0.0612933	0.868167	No	NA	NA	NA	NA	NA	NA	NA
TR7843|c1_g2_i4	82.7315	335.64	2.02041	0.0528576	0.833785	No	PREDICTED: uncharacterized protein LOC105176602	Sesamum indicum	NA	NA	NA	NA	NA
TR2893|c1_g3_i3	33.9411	137.65	2.0199	0.0642471	0.879378	No	PREDICTED: uncharacterized protein LOC105173891	Sesamum indicum	NA	NA	NA	NA	NA
TR40169|c0_g7_i3	86.9741	352.611	2.01942	0.0523928	0.833818	No	PREDICTED: protein ETHYLENE INSENSITIVE 3	Sesamum indicum	NA	NA	NA	NA	NA
TR41012|c0_g4_i1	86.9741	352.611	2.01942	0.0523928	0.834142	No	hypothetical protein MIMGU_mgv1a003646mg	Mimulus guttatus	NA	protein folding[GO:0006457]	ATP binding[GO:0005524] ; unfolded protein binding[GO:0051082]	NA	NA
TR32882|c0_g1_i2	91.2168	369.581	2.01852	0.0519278	0.836794	No	PREDICTED: uncharacterized protein LOC105168118	Sesamum indicum	NA	NA	NA	NA	NA
TR36913|c1_g3_i3	19.0919	77.3103	2.0177	0.0517763	0.835664	No	NA	NA	NA	NA	NA	NA	NA
TR40975|c1_g5_i2	19.0919	77.3103	2.0177	0.0517763	0.835992	No	PREDICTED: uncharacterized protein LOC105168944 isoform X3	Sesamum indicum	NA	NA	NA	NA	NA
TR32409|c0_g1_i3	95.4594	386.552	2.0177	0.0514712	0.835995	No	hypothetical protein MIMGU_mgv1a015205mg	Mimulus guttatus	NA	NA	NA	NA	NA
TR32777|c0_g1_i1	133.643	541.172	2.0177	0.0478012	0.824993	No	PREDICTED: uncharacterized protein LOC105169335	Sesamum indicum	NA	NA	NA	NA	NA
TR37743|c2_g2_i3	84.8528	343.182	2.01594	0.0530831	0.833501	No	PREDICTED: uncharacterized protein LOC105162071	Sesamum indicum	NA	NA	NA	NA	NA
TR38459|c0_g2_i2	131.522	531.744	2.01543	0.0481846	0.823308	No	PREDICTED: uncharacterized protein LOC105165277 isoform X2	Sesamum indicum	NA	NA	NA	NA	NA
TR39846|c0_g4_i8	23.3345	94.2809	2.0145	0.0600912	0.860336	No	PREDICTED: dihydroflavonol-4-reductase-like	Sesamum indicum	NA	NA	NA	NA	NA
TR40961|c0_g1_i1	23.3345	94.2809	2.0145	0.0600912	0.860036	No	hypothetical protein PHAVU_006G108200g	Phaseolus vulgaris	NA	oxidation-reduction process[GO:0055114]	violaxanthin de-epoxidase activity[GO:0046422]	chloroplast[GO:0009507]	NA
TR7721|c1_g2_i4	549.422	2219.37	2.01417	0.060532	0.862738	No	PREDICTED: putative phosphatidylglycerol/phosphatidylinositol transfer protein DDB_G0282179	Sesamum indicum	NA	NA	NA	NA	NA
TR39895|c0_g1_i3	125.158	505.346	2.01352	0.0488566	0.825178	No	PREDICTED: uncharacterized oxidoreductase At1g06690, chloroplastic	Sesamum indicum	NA	NA	NA	NA	NA
TR37246|c0_g1_i5	943.988	3810.83	2.01327	0.0827638	0.925567	No	PREDICTED: protein TIC 62, chloroplastic	Sesamum indicum	NA	NA	NA	NA	NA
TR37472|c3_g2_i5	78.4889	316.784	2.01294	0.0543113	0.836793	No	PREDICTED: phosphate transporter PHO1 homolog 3-like isoform X2	Sesamum indicum	NA	NA	NA	NA	NA
TR28161|c2_g2_i1	27.5772	111.251	2.01228	0.0644912	0.876586	No	NA	NA	NA	NA	NA	NA	NA
TR36250|c0_g1_i1	1688.57	6799.54	2.00963	0.124722	0.99729	No	PREDICTED: putative ion channel POLLUX-like 2 isoform X2	Sesamum indicum	NA	NA	NA	NA	NA
TR36507|c0_g1_i1	148.492	597.741	2.00913	0.0479458	0.825753	No	PREDICTED: TPR repeat-containing thioredoxin TDX	Sesamum indicum	NA	NA	NA	NA	NA
TR36084|c0_g3_i2	76.3675	307.356	2.00888	0.0551331	0.843129	No	hypothetical protein CISIN_1g0242241mg, partial	Citrus sinensis	NA	NA	NA	NA	NA
TR32191|c2_g1_i6	40.3051	162.163	2.00841	0.0644841	0.876779	No	PREDICTED: SAGA-associated factor 29-like isoform X1	Sesamum indicum	NA	NA	NA	NA	NA
TR34732|c1_g1_i10	48.7904	196.104	2.00695	0.0630542	0.876486	No	PREDICTED: RNA polymerase II C-terminal domain phosphatase-like 4	Sesamum indicum	NA	NA	NA	NA	NA
TR39227|c1_g3_i1	48.7904	196.104	2.00695	0.0630542	0.876189	No	PREDICTED: F-box protein At3g07870-like	Sesamum indicum	NA	NA	NA	NA	NA
TR38525|c0_g3_i1	420.021	1687.63	2.00646	0.054172	0.835274	No	PREDICTED: uncharacterized protein LOC105168352	Sesamum indicum	NA	NA	NA	NA	NA
TR38321|c0_g3_i3	53.033	213.075	2.0064	0.061861	0.869016	No	PREDICTED: U11/U12 small nuclear ribonucleoprotein 35 kDa protein	Sesamum indicum	NA	NA	NA	NA	NA
TR27998|c1_g3_i1	352.139	1414.21	2.00578	0.0510684	0.832414	No	PREDICTED: multiprotein-bridging factor 1a-like	Sesamum indicum	NA	NA	NA	NA	NA
TR2417|c0_g1_i5	231.224	927.724	2.00441	0.0476124	0.822424	No	hypothetical protein CICLE_v10008962mg	Citrus clementina	NA	inositol catabolic process[GO:0019310] ; oxidation-reduction process[GO:0055114]	iron ion binding[GO:0005506] ; inositol oxygenase activity[GO:0050113]	cytoplasm[GO:0005737]	map00562:Inositol phosphate metabolism(oxygenase[ec:1.13.99.1]) ; map00053:Ascorbate and aldarate metabolism(oxygenase[ec:1.13.99.1])
TR2313|c0_g1_i1	91.2168	365.81	2.00372	0.053647	0.835965	No	NA	NA	NA	NA	NA	NA	NA
TR34489|c0_g1_i5	432.749	1734.77	2.00314	0.0551614	0.842935	No	PREDICTED: protein EXORDIUM-like 5	Sesamum indicum	NA	NA	NA	NA	NA
TR36914|c1_g1_i1	12.7279	50.9117	2	0.0288625	0.756094	No	PREDICTED: carboxyl-terminal-processing peptidase 1, chloroplastic	Erythranthe guttatus	NA	NA	NA	NA	NA
TR41214|c1_g2_i1	16.9706	67.8823	2	0.0470833	0.819142	No	hypothetical protein MIMGU_mgv1a006875mg	Mimulus guttatus	NA	protein phosphorylation[GO:0006468]	ATP binding[GO:0005524] ; protein serine/threonine kinase activity[GO:0004674]	NA	NA
TR43088|c0_g2_i1	16.9706	67.8823	2	0.0470833	0.819489	No	NA	NA	NA	NA	NA	NA	NA
TR43725|c3_g4_i3	16.9706	67.8823	2	0.0470833	0.819836	No	PREDICTED: F-box/ankyrin repeat protein SKIP35-like isoform X1	Solanum tuberosum	NA	NA	NA	NA	NA
TR3954|c1_g6_i1	16.9706	67.8823	2	0.0470833	0.818795	No	hypothetical protein MIMGU_mgv1a004245mg	Mimulus guttatus	NA	NA	NA	membrane[GO:0016020]	NA
TR37072|c0_g1_i4	21.2132	84.8528	2	0.057888	0.848914	No	NA	NA	NA	NA	NA	NA	NA
TR32954|c0_g2_i7	25.4558	101.823	2	0.0642873	0.878757	No	PREDICTED: protein YIF1B-like	Sesamum indicum	NA	NA	NA	NA	NA
TR36142|c1_g1_i6	25.4558	101.823	2	0.0642873	0.879049	No	Os02g0220600, partial	Oryza sativa Japonica Group	NA	NA	NA	NA	NA
TR36049|c3_g1_i3	29.6985	118.794	2	0.0666849	0.883882	No	PREDICTED: uncharacterized protein LOC105156041	Sesamum indicum	NA	NA	NA	NA	NA
TR2824|c0_g6_i1	33.9411	135.765	2	0.0667592	0.883726	No	hypothetical protein MIMGU_mgv1a007176mg	Mimulus guttatus	NA	translational elongation[GO:0006414]	translation elongation factor activity[GO:0003746]	NA	NA
TR34479|c0_g1_i1	33.9411	135.765	2	0.0667592	0.883157	No	PREDICTED: 3-ketoacyl-CoA synthase 6-like	Sesamum indicum	NA	NA	NA	NA	NA
TR35130|c0_g2_i3	33.9411	135.765	2	0.0667592	0.883442	No	PREDICTED: red chlorophyll catabolite reductase-like	Sesamum indicum	NA	NA	NA	NA	NA
TR39234|c1_g5_i1	38.1838	152.735	2	0.0659961	0.879863	No	PREDICTED: peptidyl-prolyl cis-trans isomerase CYP38, chloroplastic	Nicotiana sylvestris	NA	NA	NA	NA	NA
TR37993|c1_g1_i3	55.1543	220.617	2	0.0620092	0.869908	No	PREDICTED: probable serine/threonine-protein kinase Cx32, chloroplastic isoform X2	Sesamum indicum	NA	NA	NA	NA	NA
TR3986|c0_g3_i3	110.309	441.235	2	0.0517576	0.836676	No	PREDICTED: short-chain dehydrogenase TIC 32, chloroplastic-like isoform X2	Erythranthe guttatus	NA	NA	NA	NA	NA
TR39255|c1_g2_i1	318.198	1270.91	1.99786	0.0505292	0.827566	No	PREDICTED: LOW QUALITY PROTEIN: phototropin-1	Sesamum indicum	NA	NA	NA	NA	NA
TR30882|c0_g1_i2	146.371	584.542	1.99767	0.0492796	0.82587	No	NA	NA	NA	NA	NA	NA	NA
TR43910|c2_g8_i1	1690.69	6744.86	1.99617	0.126527	1.00255	No	glycine dehydrogenase [decarboxylating], mitochondrial, partial	Genlisea aurea	NA	glycine catabolic process[GO:0006546] ; oxidation-reduction process[GO:0055114]	glycine dehydrogenase (decarboxylating) activity[GO:0004375]	NA	map00260:Glycine, serine and threonine metabolism(dehydrogenase (aminomethyl-transferring)[ec:1.4.4.2])
TR40127|c2_g1_i10	86.9741	346.954	1.99608	0.0551335	0.842822	No	NA	NA	NA	NA	NA	NA	NA
TR42171|c0_g10_i1	82.7315	329.983	1.99588	0.0557468	0.848724	No	PREDICTED: LOW QUALITY PROTEIN: U1 small nuclear ribonucleoprotein 70 kDa	Sesamum indicum	NA	NA	NA	NA	NA
TR31368|c0_g1_i1	197.283	786.303	1.99482	0.0484374	0.822495	No	hypothetical protein MIMGU_mgv1a005538mg	Mimulus guttatus	NA	NA	transferase activity[GO:0016740]	NA	NA
TR39177|c0_g1_i4	110.309	439.349	1.99382	0.0524751	0.832226	No	PREDICTED: reticuline oxidase-like protein	Sesamum indicum	NA	NA	NA	NA	NA
TR2708|c0_g2_i2	485.782	1934.64	1.99369	0.0590317	0.8544	No	PREDICTED: uncharacterized protein LOC105156519	Sesamum indicum	NA	NA	NA	NA	NA
TR35347|c1_g2_i4	53.033	211.189	1.99357	0.0635432	0.877639	No	NA	NA	NA	NA	NA	NA	NA
TR40068|c3_g1_i1	207.889	827.786	1.99344	0.0485711	0.824083	No	PREDICTED: LOW QUALITY PROTEIN: benzyl alcohol O-benzoyltransferase-like	Sesamum indicum	NA	NA	NA	NA	NA
TR26444|c0_g1_i1	205.768	818.358	1.99171	0.0487507	0.825087	No	hypothetical protein MIMGU_mgv1a015733mg	Mimulus guttatus	NA	metabolic process[GO:0008152]	ATP binding[GO:0005524] ; ligase activity[GO:0016874]	NA	NA
TR35004|c0_g4_i2	36.0624	143.307	1.99054	0.0676544	0.888702	No	PREDICTED: zinc finger CCCH domain-containing protein 23	Sesamum indicum	NA	NA	NA	NA	NA
TR40640|c1_g1_i3	326.683	1297.31	1.98955	0.0516922	0.835949	No	PREDICTED: DEAD-box ATP-dependent RNA helicase 47A	Sesamum indicum	NA	NA	NA	NA	NA
TR40654|c0_g3_i2	354.26	1406.67	1.9894	0.0528176	0.833474	No	hypothetical protein MIMGU_mgv1a009475mg	Mimulus guttatus	NA	NA	NA	integral component of membrane[GO:0016021]	NA
TR32506|c0_g1_i1	31.8198	126.336	1.98927	0.0682594	0.891801	No	NA	NA	NA	NA	NA	NA	NA
TR4003|c0_g1_i2	27.5772	109.366	1.98762	0.0673617	0.885991	No	NA	NA	NA	NA	NA	NA	NA
TR42506|c1_g2_i1	55.1543	218.732	1.98762	0.0636494	0.877925	No	PREDICTED: putative 1-phosphatidylinositol-3-phosphate 5-kinase FAB1D	Sesamum indicum	NA	NA	NA	NA	NA
TR3439|c0_g2_i5	144.25	571.342	1.98579	0.0507033	0.829426	No	PREDICTED: uncharacterized protein LOC105966158	Erythranthe guttatus	NA	NA	NA	NA	NA
TR36864|c0_g1_i4	23.3345	92.3953	1.98535	0.0629958	0.877158	No	PREDICTED: uncharacterized protein LOC105165614	Sesamum indicum	NA	NA	NA	NA	NA
TR2465|c0_g1_i2	46.669	184.791	1.98535	0.0663915	0.8817	No	NA	NA	NA	NA	NA	NA	NA
TR28695|c0_g1_i6	3419.57	13535	1.98481	0.210093	1.06699	No	hypothetical protein MIMGU_mgv1a017579mg	Mimulus guttatus	NA	NA	NA	NA	NA
TR32214|c0_g3_i3	127.279	503.46	1.98388	0.0520329	0.836518	No	NA	NA	NA	NA	NA	NA	NA
TR37952|c0_g1_i6	184.555	729.734	1.98332	0.0497745	0.82909	No	PREDICTED: probable serine incorporator	Sesamum indicum	NA	NA	NA	NA	NA
TR35428|c2_g3_i6	118.794	469.519	1.98272	0.052913	0.83338	No	PREDICTED: 40S ribosomal protein S2-4-like	Sesamum indicum	NA	NA	NA	NA	NA
TR7737|c0_g1_i1	195.161	771.218	1.98247	0.049767	0.829302	No	hypothetical protein MIMGU_mgv1a006291mg	Mimulus guttatus	NA	NA	NA	integral component of membrane[GO:0016021]	NA
TR39948|c0_g10_i1	19.0919	75.4247	1.98208	0.0547061	0.8391	No	hypothetical protein MIMGU_mgv1a011129mg	Mimulus guttatus	NA	regulation of transcription, DNA-templated[GO:0006355] ; transcription, DNA-templated[GO:0006351]	DNA binding[GO:0003677]	nucleus[GO:0005634]	NA
TR40294|c0_g4_i1	19.0919	75.4247	1.98208	0.0547061	0.839413	No	NA	NA	NA	NA	NA	NA	NA
TR42612|c2_g4_i1	19.0919	75.4247	1.98208	0.0547061	0.838787	No	Calmodulin-domain protein kinase 5 isoform 1	Theobroma cacao	NA	NA	NA	NA	NA
TR41258|c0_g1_i2	38.1838	150.849	1.98208	0.0683535	0.891896	No	NA	NA	NA	NA	NA	NA	NA
TR38260|c0_g6_i1	33.9411	133.879	1.97982	0.0693865	0.898808	No	PREDICTED: uncharacterized protein LOC105156013	Sesamum indicum	NA	NA	NA	NA	NA
TR36528|c0_g1_i2	481.54	1898.82	1.97937	0.0602878	0.861649	No	cytochrome P450 CYP92A73	Salvia miltiorrhiza	NA	oxidation-reduction process[GO:0055114]	heme binding[GO:0020037] ; oxidoreductase activity, acting on paired donors, with incorporation or reduction of molecular oxygen[GO:0016705] ; monooxygenase activity[GO:0004497] ; iron ion binding[GO:0005506]	NA	NA
TR7934|c3_g1_i5	82.7315	326.212	1.9793	0.0577745	0.848764	No	PREDICTED: calcium-dependent protein kinase SK5, partial	Sesamum indicum	NA	NA	NA	NA	NA
TR33410|c0_g1_i1	63.6396	250.787	1.97847	0.0621149	0.870202	No	PREDICTED: uncharacterized protein LOC105166840	Sesamum indicum	NA	NA	NA	NA	NA
TR31495|c1_g1_i6	108.187	426.15	1.97783	0.0546114	0.8389	No	PREDICTED: late embryogenesis abundant protein Lea5	Sesamum indicum	NA	NA	NA	NA	NA
TR37812|c0_g1_i1	14.8492	58.4542	1.97692	0.0402952	0.79767	No	NA	NA	NA	NA	NA	NA	NA
TR40716|c0_g5_i1	14.8492	58.4542	1.97692	0.0402952	0.797285	No	pectin lyase-like superfamily protein, partial	Artemisia annua	NA	carbohydrate metabolic process[GO:0005975] ; cell wall organization[GO:0071555]	polygalacturonase activity[GO:0004650] ; lyase activity[GO:0016829]	extracellular region[GO:0005576]	map00500:Starch and sucrose metabolism(pectin depolymerase[ec:3.2.1.15]) ; map00040:Pentose and glucuronate interconversions(pectin depolymerase[ec:3.2.1.15])
TR36628|c1_g1_i2	59.397	233.817	1.97692	0.0636853	0.878126	No	chloroplast tocopherol cyclase	Sesamum indicum	NA	metabolic process[GO:0008152]	tocopherol cyclase activity[GO:0009976]	NA	NA
TR39309|c0_g5_i3	89.0955	350.725	1.97692	0.0571774	0.84849	No	hypothetical protein EUGRSUZ_B00357	Eucalyptus grandis	NA	oxidation-reduction process[GO:0055114]	oxidoreductase activity, acting on the aldehyde or oxo group of donors, NAD or NADP as acceptor[GO:0016620]	NA	NA
TR41470|c1_g5_i4	99.7021	392.209	1.97593	0.0558746	0.849095	No	hypothetical protein M569_06257, partial	Genlisea aurea	NA	transport[GO:0006810]	NA	integral component of membrane[GO:0016021]	NA
TR35166|c0_g2_i1	400.93	1576.38	1.97519	0.0564397	0.852009	No	PREDICTED: thioredoxin-like protein CDSP32, chloroplastic	Populus euphratica	NA	NA	NA	NA	NA
TR33799|c0_g3_i1	55.1543	216.846	1.97513	0.0653387	0.878799	No	hypothetical protein MIMGU_mgv1a009899mg	Mimulus guttatus	NA	NA	NA	NA	NA
TR40680|c2_g1_i2	411.536	1617.86	1.975	0.0569861	0.847794	No	PREDICTED: bifunctional riboflavin biosynthesis protein RIBA 1, chloroplastic	Sesamum indicum	NA	NA	NA	NA	NA
TR35739|c0_g1_i2	190.919	750.476	1.97485	0.0506316	0.828913	No	hypothetical protein MIMGU_mgv1a010363mg	Mimulus guttatus	NA	carbohydrate metabolic process[GO:0005975]	carbohydrate binding[GO:0030246] ; isomerase activity[GO:0016853]	NA	NA
TR38356|c0_g4_i3	120.915	475.176	1.97446	0.0536916	0.836026	No	PREDICTED: uncharacterized protein LOC105160330	Sesamum indicum	NA	NA	NA	NA	NA
TR42136|c0_g1_i2	131.522	516.659	1.97391	0.052868	0.83363	No	PREDICTED: protein SUPPRESSOR OF GENE SILENCING 3	Sesamum indicum	NA	NA	NA	NA	NA
TR39266|c3_g1_i2	411.536	1615.97	1.97331	0.0571648	0.848609	No	PREDICTED: beta-galactosidase 3	Sesamum indicum	NA	NA	NA	NA	NA
TR27228|c0_g1_i4	25.4558	99.9378	1.97303	0.0672563	0.886592	No	NA	NA	NA	NA	NA	NA	NA
TR32755|c0_g1_i1	25.4558	99.9378	1.97303	0.0672563	0.885739	No	PREDICTED: homeobox-leucine zipper protein HAT4-like	Solanum tuberosum	NA	NA	NA	NA	NA
TR38866|c0_g7_i1	25.4558	99.9378	1.97303	0.0672563	0.886023	No	PREDICTED: uncharacterized protein LOC105156000	Sesamum indicum	NA	NA	NA	NA	NA
TR38307|c0_g1_i4	25.4558	99.9378	1.97303	0.0672563	0.886307	No	PREDICTED: tobamovirus multiplication protein 1-like isoform X1	Erythranthe guttatus	NA	NA	NA	NA	NA
TR22739|c0_g2_i1	50.9117	199.876	1.97303	0.0669625	0.883286	No	hypothetical protein M569_17359, partial	Genlisea aurea	NA	protein metabolic process[GO:0019538]	ATP binding[GO:0005524]	NA	NA
TR3227|c0_g2_i1	101.823	399.751	1.97303	0.0559609	0.849151	No	PREDICTED: gamma-glutamyl hydrolase 2-like	Sesamum indicum	NA	NA	NA	NA	NA
TR37089|c1_g2_i2	150.614	590.198	1.97035	0.0521568	0.83524	No	hypothetical protein MIMGU_mgv1a008386mg	Mimulus guttatus	NA	NA	NA	NA	NA
TR37092|c5_g3_i2	526.087	2060.98	1.96996	0.0638717	0.879811	No	hypothetical protein POPTR_1455s00210g	Populus trichocarpa	NA	microtubule-based process[GO:0007017]	structural constituent of cytoskeleton[GO:0005200] ; GTP binding[GO:0005525]	microtubule[GO:0005874]	NA
TR3089|c0_g1_i1	2367.39	9265.93	1.96864	0.164811	1.03103	No	chlorophyll A/B binding protein, putative	Ricinus communis	NA	photosynthesis, light harvesting[GO:0009765] ; protein-chromophore linkage[GO:0018298]	metal ion binding[GO:0046872] ; chlorophyll binding[GO:0016168]	photosystem II[GO:0009523] ; integral component of membrane[GO:0016021] ; chloroplast[GO:0009507] ; photosystem I[GO:0009522]	NA
TR31330|c3_g4_i2	517.602	2025.15	1.96812	0.0635818	0.877582	No	PREDICTED: oxygen-evolving enhancer protein 2-1, chloroplastic-like	Sesamum indicum	NA	NA	NA	NA	NA
TR34308|c0_g1_i1	10.6066	41.4836	1.96758	0.0183041	0.680416	No	hypothetical protein MIMGU_mgv1a006743mg	Mimulus guttatus	NA	protein phosphorylation[GO:0006468] ; signal transduction[GO:0007165]	ATP binding[GO:0005524] ; protein serine/threonine kinase activity[GO:0004674]	NA	NA
TR43166|c2_g3_i2	10.6066	41.4836	1.96758	0.0183041	0.681033	No	NA	NA	NA	NA	NA	NA	NA
TR41226|c1_g5_i1	21.2132	82.9672	1.96758	0.0609464	0.864745	No	hypothetical protein MIMGU_mgv1a006816mg	Mimulus guttatus	NA	protein phosphorylation[GO:0006468]	protein kinase activity[GO:0004672] ; ATP binding[GO:0005524]	NA	NA
TR43208|c3_g4_i1	31.8198	124.451	1.96758	0.0710782	0.904744	No	PREDICTED: WEB family protein At5g55860-like	Sesamum indicum	NA	NA	NA	NA	NA
TR36608|c0_g3_i4	63.6396	248.902	1.96758	0.0635843	0.877322	No	PREDICTED: fasciclin-like arabinogalactan protein 2	Sesamum indicum	NA	NA	NA	NA	NA
TR44572|c1_g1_i12	84.8528	331.869	1.96758	0.0589442	0.855848	No	hypothetical protein MIMGU_mgv1a001054mg	Mimulus guttatus	NA	carbohydrate metabolic process[GO:0005975]	carbohydrate binding[GO:0030246] ; hydrolase activity, hydrolyzing O-glycosyl compounds[GO:0004553]	NA	NA
TR39309|c0_g5_i2	106.066	414.836	1.96758	0.0561125	0.851136	No	hypothetical protein M569_02499, partial	Genlisea aurea	NA	oxidation-reduction process[GO:0055114]	oxidoreductase activity, acting on the aldehyde or oxo group of donors, NAD or NADP as acceptor[GO:0016620]	NA	NA
TR28256|c0_g6_i2	1306.73	5110.03	1.96737	0.108699	0.970002	No	PREDICTED: photosystem II reaction center W protein, chloroplastic	Sesamum indicum	NA	NA	NA	NA	NA
TR3825|c0_g1_i3	133.643	522.316	1.96654	0.0535832	0.835604	No	PREDICTED: uncharacterized protein LOC105165908 isoform X2	Sesamum indicum	NA	NA	NA	NA	NA
TR40323|c0_g1_i2	224.86	878.698	1.96634	0.0515709	0.834316	No	PREDICTED: uncharacterized protein LOC104226710	Nicotiana sylvestris	NA	NA	NA	NA	NA
TR36772|c0_g1_i5	243.952	952.237	1.96472	0.0519841	0.83606	No	NA	NA	NA	NA	NA	NA	NA
TR31753|c0_g1_i1	585.484	2285.37	1.96472	0.0678873	0.888919	No	PREDICTED: PGR5-like protein 1A, chloroplastic	Sesamum indicum	NA	NA	NA	NA	NA
TR41615|c0_g2_i3	76.3675	297.928	1.96393	0.0607588	0.863573	No	PREDICTED: probable transcription factor GLK1	Sesamum indicum	NA	NA	NA	NA	NA
TR36144|c0_g1_i1	114.551	446.891	1.96393	0.0556014	0.847767	No	beta-1,3-glucanase	Camellia sinensis	NA	metabolic process[GO:0008152]	hydrolase activity, hydrolyzing O-glycosyl compounds[GO:0004553]	NA	NA
TR44820|c0_g1_i2	305.47	1191.71	1.96393	0.0536386	0.836152	No	PREDICTED: uncharacterized protein LOC105177096 isoform X3	Sesamum indicum	NA	NA	NA	NA	NA
TR42404|c0_g2_i2	65.7609	256.444	1.96334	0.0635106	0.877484	No	PREDICTED: C2 domain-containing protein At1g53590 isoform X2	Erythranthe guttatus	NA	NA	NA	NA	NA
TR35316|c0_g4_i1	176.07	686.365	1.96283	0.0521995	0.835598	No	hypothetical protein MIMGU_mgv1a012593mg	Mimulus guttatus	NA	proteolysis involved in cellular protein catabolic process[GO:0051603]	threonine-type endopeptidase activity[GO:0004298]	cytoplasm[GO:0005737] ; proteasome core complex[GO:0005839] ; nucleus[GO:0005634]	NA
TR3584|c0_g3_i2	82.7315	322.441	1.96253	0.0598878	0.859221	No	PREDICTED: major pollen allergen Lol p 11-like	Sesamum indicum	NA	NA	NA	NA	NA
TR33478|c0_g1_i2	44.5477	173.477	1.96132	0.0699665	0.900077	No	hypothetical protein MIMGU_mgv1a005645mg	Mimulus guttatus	NA	metabolic process[GO:0008152]	transferase activity, transferring hexosyl groups[GO:0016758]	NA	NA
TR38353|c0_g1_i5	133.643	520.431	1.96132	0.054206	0.835485	No	PREDICTED: uncharacterized protein LOC105174419	Sesamum indicum	NA	NA	NA	NA	NA
TR32414|c1_g1_i3	163.342	635.453	1.95989	0.0528752	0.833424	No	hypothetical protein MIMGU_mgv1a005305mg	Mimulus guttatus	NA	NA	NA	integral component of membrane[GO:0016021]	NA
TR30651|c0_g1_i2	180.312	701.45	1.95984	0.0524579	0.832275	No	PREDICTED: uncharacterized protein LOC105155373	Sesamum indicum	NA	NA	NA	NA	NA
TR34542|c0_g1_i1	16.9706	65.9966	1.95936	0.0499798	0.826478	No	PREDICTED: ankyrin repeat-containing protein At2g01680	Sesamum indicum	NA	NA	NA	NA	NA
TR35978|c2_g3_i1	16.9706	65.9966	1.95936	0.0499798	0.826146	No	PREDICTED: PRA1 family protein B3	Sesamum indicum	NA	NA	NA	NA	NA
TR36049|c3_g2_i1	16.9706	65.9966	1.95936	0.0499798	0.826811	No	NA	NA	NA	NA	NA	NA	NA
TR25723|c0_g1_i1	33.9411	131.993	1.95936	0.0721346	0.909175	No	PREDICTED: casein kinase II subunit alpha-like	Sesamum indicum	NA	NA	NA	NA	NA
TR43421|c0_g2_i3	33.9411	131.993	1.95936	0.0721346	0.908896	No	PREDICTED: LOW QUALITY PROTEIN: protein tesmin/TSO1-like CXC 2	Sesamum indicum	NA	NA	NA	NA	NA
TR41566|c1_g1_i9	108.187	420.493	1.95855	0.0569832	0.848059	No	PREDICTED: uncharacterized protein LOC105158818	Sesamum indicum	NA	NA	NA	NA	NA
TR35889|c0_g2_i1	721.249	2802.03	1.9579	0.0765193	0.912103	No	unnamed protein product	Coffea canephora	NA	ammonium transmembrane transport[GO:0072488]	ammonium transmembrane transporter activity[GO:0008519]	integral component of membrane[GO:0016021]	NA
TR3729|c0_g3_i3	407.294	1582.03	1.95764	0.0586447	0.854822	No	50S ribosomal protein L27	Morus notabilis	NA	translation[GO:0006412]	structural constituent of ribosome[GO:0003735]	ribosome[GO:0005840]	NA
TR33775|c0_g5_i5	80.6102	313.013	1.95719	0.0608842	0.864758	No	PREDICTED: RNA polymerase II C-terminal domain phosphatase-like 1	Sesamum indicum	NA	NA	NA	NA	NA
TR30383|c1_g1_i2	103.945	403.522	1.95683	0.0577153	0.848502	No	PREDICTED: uncharacterized protein LOC105158090 isoform X3	Sesamum indicum	NA	NA	NA	NA	NA
TR3629|c2_g14_i6	86.9741	337.526	1.95634	0.0600785	0.860454	No	phenylcoumaran benzylic ether reductase-like protein	Salvia fruticosa	Lamiaceae	NA	NA	NA	NA
TR33175|c0_g3_i1	23.3345	90.5097	1.95561	0.0660922	0.880572	No	PREDICTED: peptidyl-prolyl cis-trans isomerase FKBP16-4, chloroplastic	Sesamum indicum	NA	NA	NA	NA	NA
TR7708|c3_g10_i2	46.669	181.019	1.95561	0.0704185	0.90278	No	hypothetical protein MIMGU_mgv1a011200mg	Mimulus guttatus	NA	metabolic process[GO:0008152]	amino acid binding[GO:0016597]	NA	NA
TR40844|c1_g1_i1	617.304	2392.85	1.95468	0.0708762	0.903572	No	PREDICTED: probable beta-D-xylosidase 7	Sesamum indicum	NA	NA	NA	NA	NA
TR29122|c0_g2_i5	218.496	846.643	1.95415	0.0528871	0.833291	No	PREDICTED: thioredoxin F1, chloroplastic-like	Sesamum indicum	NA	NA	NA	NA	NA
TR2945|c0_g3_i1	29.6985	115.023	1.95346	0.0725539	0.911105	No	PREDICTED: uncharacterized protein LOC105156092	Sesamum indicum	NA	NA	NA	NA	NA
TR34562|c1_g2_i4	29.6985	115.023	1.95346	0.0725539	0.91027	No	hypothetical protein M569_13812	Genlisea aurea	NA	NA	NA	NA	NA
TR36054|c0_g2_i1	29.6985	115.023	1.95346	0.0725539	0.910549	No	PREDICTED: uncharacterized protein LOC105161362	Sesamum indicum	NA	NA	NA	NA	NA
TR41822|c0_g3_i6	29.6985	115.023	1.95346	0.0725539	0.909992	No	NA	NA	NA	NA	NA	NA	NA
TR42355|c0_g7_i5	29.6985	115.023	1.95346	0.0725539	0.910827	No	NA	NA	NA	NA	NA	NA	NA
TR42635|c0_g1_i5	95.4594	369.581	1.95293	0.0593271	0.857467	No	NA	NA	NA	NA	NA	NA	NA
TR34048|c1_g1_i1	1134.91	4393.49	1.95279	0.100837	0.955253	No	PREDICTED: protochlorophyllide reductase, chloroplastic	Pyrus x bretschneideri	NA	NA	NA	NA	NA
TR39318|c2_g2_i1	65.7609	254.558	1.95269	0.0649767	0.876802	No	Selenium-binding protein 1 isoform 2	Theobroma cacao	NA	NA	selenium binding[GO:0008430]	NA	NA
TR7922|c0_g4_i1	36.0624	139.536	1.95207	0.0728634	0.911369	No	PREDICTED: scarecrow-like protein 32	Sesamum indicum	NA	NA	NA	NA	NA
TR35318|c1_g1_i1	1497.65	5794.5	1.95198	0.121461	0.988733	No	PREDICTED: ribose-phosphate pyrophosphokinase 1	Sesamum indicum	NA	NA	NA	NA	NA
TR38030|c0_g2_i3	186.676	722.192	1.95184	0.0532756	0.833022	No	PREDICTED: peroxisomal membrane protein PEX14-like isoform X2	Sesamum indicum	NA	NA	NA	NA	NA
TR4095|c0_g1_i8	120.915	467.633	1.95138	0.0565063	0.84958	No	PREDICTED: transcription factor MYC2	Sesamum indicum	NA	NA	NA	NA	NA
TR40514|c0_g1_i6	42.4264	164.049	1.95109	0.0717259	0.906806	No	hypothetical protein MIMGU_mgv1a013501mg	Mimulus guttatus	NA	NA	NA	integral component of membrane[GO:0016021]	NA
TR41801|c1_g2_i1	608.819	2353.25	1.95057	0.0708574	0.903614	No	PREDICTED: uncharacterized protein LOC105170964	Sesamum indicum	NA	NA	NA	NA	NA
TR44455|c2_g5_i1	48.7904	188.562	1.95037	0.0706862	0.904519	No	NA	NA	NA	NA	NA	NA	NA
TR41253|c0_g1_i1	364.867	1406.67	1.94684	0.0578391	0.848803	No	hypothetical protein MIMGU_mgv1a003626mg	Mimulus guttatus	NA	transport[GO:0006810]	transporter activity[GO:0005215]	integral component of membrane[GO:0016021]	NA
TR28929|c1_g2_i1	12.7279	49.0261	1.94555	0.030855	0.764415	No	PREDICTED: ethylene-responsive transcription factor RAP2-12-like	Sesamum indicum	NA	NA	NA	NA	NA
TR36836|c1_g3_i3	12.7279	49.0261	1.94555	0.030855	0.763955	No	PREDICTED: uncharacterized protein LOC105174078	Sesamum indicum	NA	NA	NA	NA	NA
TR40144|c0_g4_i1	12.7279	49.0261	1.94555	0.030855	0.763494	No	PREDICTED: MATE efflux family protein LAL5-like	Sesamum indicum	NA	NA	NA	NA	NA
TR39039|c0_g2_i3	19.0919	73.5391	1.94555	0.0578646	0.848873	No	PREDICTED: transcription factor TCP10-like	Sesamum indicum	NA	NA	NA	NA	NA
TR34256|c0_g7_i1	25.4558	98.0521	1.94555	0.0703824	0.9026	No	PREDICTED: bifunctional riboflavin biosynthesis protein RIBA 1, chloroplastic-like	Sesamum indicum	NA	NA	NA	NA	NA
TR40144|c0_g1_i1	31.8198	122.565	1.94555	0.0740316	0.910184	No	PREDICTED: MATE efflux family protein LAL5-like	Sesamum indicum	NA	NA	NA	NA	NA
TR41012|c0_g3_i1	57.2756	220.617	1.94555	0.0687702	0.895342	No	PREDICTED: ATP-dependent Clp protease ATP-binding subunit clpX-like, mitochondrial	Sesamum indicum	NA	NA	NA	NA	NA
TR27864|c0_g1_i3	101.823	392.209	1.94555	0.0594288	0.858332	No	PREDICTED: MADS-box protein SVP-like	Sesamum indicum	NA	NA	NA	NA	NA
TR35018|c2_g1_i1	101.823	392.209	1.94555	0.0594288	0.85803	No	PREDICTED: fasciclin-like arabinogalactan protein 1	Sesamum indicum	NA	NA	NA	NA	NA
TR4087|c0_g1_i3	167.584	644.881	1.94415	0.0545926	0.838924	No	PREDICTED: cucumber peeling cupredoxin	Sesamum indicum	NA	NA	NA	NA	NA
TR43170|c0_g4_i6	1586.75	6101.86	1.94318	0.127654	1.00624	No	PREDICTED: polyadenylate-binding protein 2-like	Sesamum indicum	NA	NA	NA	NA	NA
TR39694|c0_g1_i2	965.201	3709.01	1.94213	0.0925026	0.942371	No	PREDICTED: uncharacterized protein LOC105177775	Sesamum indicum	NA	NA	NA	NA	NA
TR38680|c0_g10_i1	184.555	708.992	1.94172	0.0544899	0.83766	No	PREDICTED: 24-methylenesterol C-methyltransferase 2	Sesamum indicum	NA	NA	NA	NA	NA
TR38186|c0_g1_i4	40.3051	154.621	1.9397	0.0737633	0.910974	No	PREDICTED: zinc finger CCCH domain-containing protein ZFN-like	Sesamum indicum	NA	NA	NA	NA	NA
TR2901|c0_g1_i3	114.551	439.349	1.93937	0.0586896	0.85487	No	PREDICTED: probable aquaporin SIP2-1	Sesamum indicum	NA	NA	NA	NA	NA
TR29028|c1_g2_i6	33.9411	130.108	1.9386	0.0750099	0.906207	No	PREDICTED: uncharacterized protein LOC105166925	Sesamum indicum	NA	NA	NA	NA	NA
TR35862|c0_g3_i4	33.9411	130.108	1.9386	0.0750099	0.906474	No	PREDICTED: dnaJ homolog subfamily B member 7 isoform X1	Sesamum indicum	NA	NA	NA	NA	NA
TR38657|c0_g9_i5	67.8823	260.215	1.9386	0.0663178	0.881576	No	hypothetical protein MIMGU_mgv1a026814mg	Mimulus guttatus	NA	metabolic process[GO:0008152]	transferase activity, transferring hexosyl groups[GO:0016758]	NA	NA
TR35139|c0_g4_i1	129.401	495.918	1.93826	0.0573796	0.850262	No	PREDICTED: haloacid dehalogenase-like hydrolase domain-containing protein At3g48420 isoform X2	Populus euphratica	NA	NA	NA	NA	NA
TR31737|c1_g6_i1	61.5183	235.702	1.93788	0.0684399	0.892456	No	NA	NA	NA	NA	NA	NA	NA
TR37616|c0_g4_i1	27.5772	105.595	1.93699	0.0735495	0.911623	No	hypothetical protein B456_005G227300	Gossypium raimondii	NA	transmembrane transport[GO:0055085]	NA	integral component of membrane[GO:0016021]	NA
TR42412|c1_g1_i1	27.5772	105.595	1.93699	0.0735495	0.911348	No	NA	NA	NA	NA	NA	NA	NA
TR40750|c0_g3_i3	137.886	527.973	1.93699	0.0568814	0.849313	No	26S protease regulatory subunit 7	Oryza sativa Indica Group	NA	proteolysis[GO:0006508]	ATP binding[GO:0005524] ; peptidase activity[GO:0008233]	NA	NA
TR39964|c0_g1_i4	125.158	478.947	1.93612	0.0580275	0.850656	No	PREDICTED: nudix hydrolase 8-like isoform X1	Sesamum indicum	NA	NA	NA	NA	NA
TR39216|c2_g1_i4	91.2168	348.839	1.93519	0.0622462	0.870853	No	PREDICTED: ATP-dependent zinc metalloprotease FTSH 7, chloroplastic-like	Sesamum indicum	NA	NA	NA	NA	NA
TR17644|c0_g2_i2	21.2132	81.0816	1.93441	0.0642256	0.879964	No	PREDICTED: glutamine synthetase leaf isozyme, chloroplastic	Sesamum indicum	NA	NA	NA	NA	NA
TR39665|c0_g3_i1	21.2132	81.0816	1.93441	0.0642256	0.880551	No	PREDICTED: uncharacterized protein LOC105168293	Sesamum indicum	NA	NA	NA	NA	NA
TR42862|c0_g5_i1	21.2132	81.0816	1.93441	0.0642256	0.880257	No	Putative 12-oxophytodienoate reductase 11	Morus notabilis	NA	oxidation-reduction process[GO:0055114]	oxidoreductase activity[GO:0016491] ; FMN binding[GO:0010181]	NA	NA
TR40516|c0_g1_i1	269.408	1029.55	1.93415	0.055927	0.849264	No	PREDICTED: stachyose synthase	Sesamum indicum	NA	NA	NA	NA	NA
TR41685|c0_g1_i1	72.1249	275.3	1.93244	0.0660105	0.879769	No	PREDICTED: uncharacterized protein LOC105169651	Sesamum indicum	NA	NA	NA	NA	NA
TR35053|c1_g2_i2	108.187	412.95	1.93244	0.0603351	0.861726	No	hypothetical protein CICLE_v10019846mg	Citrus clementina	NA	NA	ATP binding[GO:0005524]	integral component of membrane[GO:0016021]	NA
TR34662|c0_g2_i2	2269.81	8662.53	1.93222	0.165181	1.03146	No	PREDICTED: uncharacterized protein LOC105166195	Sesamum indicum	NA	NA	NA	NA	NA
TR38133|c1_g1_i7	95.4594	363.924	1.93068	0.0622486	0.870591	No	PREDICTED: RING finger and CHY zinc finger domain-containing protein 1-like	Sesamum indicum	NA	NA	NA	NA	NA
TR31877|c0_g1_i4	154.856	590.198	1.93027	0.0567525	0.848932	No	NA	NA	NA	NA	NA	NA	NA
TR31994|c0_g2_i5	755.19	2877.45	1.92988	0.0818849	0.923279	No	PREDICTED: protein THYLAKOID FORMATION1, chloroplastic	Sesamum indicum	NA	NA	NA	NA	NA
TR42535|c1_g2_i1	14.8492	56.5685	1.92961	0.0429699	0.799743	No	hypothetical protein	Plantago major	NA	NA	NA	NA	NA
TR24588|c0_g1_i1	29.6985	113.137	1.92961	0.0757082	0.907968	No	PREDICTED: F-box/LRR-repeat protein 14	Sesamum indicum	NA	NA	NA	NA	NA
TR41476|c0_g1_i2	89.0955	339.411	1.92961	0.0633001	0.877528	No	PREDICTED: protein NRT1/ PTR FAMILY 8.1-like	Sesamum indicum	NA	NA	NA	NA	NA
TR43850|c0_g1_i2	103.945	395.98	1.92961	0.0612441	0.868068	No	hypothetical protein MIMGU_mgv1a023973mg, partial	Mimulus guttatus	NA	proteolysis[GO:0006508]	serine-type endopeptidase activity[GO:0004252]	NA	NA
TR43266|c0_g6_i1	97.5807	371.467	1.92856	0.0622369	0.87102	No	PREDICTED: zinc finger protein CONSTANS-LIKE 9	Sesamum indicum	NA	NA	NA	NA	NA
TR38722|c1_g6_i3	135.765	516.659	1.92811	0.0581574	0.851649	No	PREDICTED: protein TRIGALACTOSYLDIACYLGLYCEROL 2, chloroplastic	Sesamum indicum	NA	NA	NA	NA	NA
TR2675|c0_g2_i7	173.948	661.852	1.92785	0.0563796	0.851415	No	unnamed protein product	Coffea canephora	NA	translation[GO:0006412]	structural constituent of ribosome[GO:0003735]	ribosome[GO:0005840]	NA
TR2208|c1_g1_i2	53.033	201.761	1.92769	0.0727643	0.910685	No	PREDICTED: calcium-dependent protein kinase 10-like	Sesamum indicum	NA	NA	NA	NA	NA
TR34986|c3_g4_i2	53.033	201.761	1.92769	0.0727643	0.910962	No	hypothetical protein MIMGU_mgv1a004967mg	Mimulus guttatus	NA	NA	NA	NA	NA
TR33827|c0_g2_i1	61.5183	233.817	1.92629	0.0701288	0.901317	No	PREDICTED: probable sodium-coupled neutral amino acid transporter 6	Sesamum indicum	NA	NA	NA	NA	NA
TR37293|c0_g4_i1	61.5183	233.817	1.92629	0.0701288	0.901035	No	PREDICTED: 3-isopropylmalate dehydratase large subunit isoform X2	Erythranthe guttatus	NA	NA	NA	NA	NA
TR42743|c2_g1_i1	324.562	1233.19	1.92583	0.0585865	0.854278	No	PREDICTED: vacuolar protein 8	Sesamum indicum	NA	NA	NA	NA	NA
TR41093|c0_g1_i4	131.522	499.689	1.92573	0.0587993	0.855862	No	PREDICTED: plant intracellular Ras-group-related LRR protein 5-like	Sesamum indicum	NA	NA	NA	NA	NA
TR3571|c1_g1_i4	263.044	999.378	1.92573	0.0567637	0.84879	No	hypothetical protein MIMGU_mgv1a011768mg	Mimulus guttatus	NA	catabolic process[GO:0009056] ; macromolecule metabolic process[GO:0043170]	NA	NA	NA
TR37246|c0_g3_i1	23.3345	88.624	1.92523	0.0693962	0.898651	No	PREDICTED: protein TIC 62, chloroplastic	Sesamum indicum	NA	NA	NA	NA	NA
TR42320|c0_g4_i5	23.3345	88.624	1.92523	0.0693962	0.898367	No	PREDICTED: FGGY carbohydrate kinase domain-containing protein isoform X2	Populus euphratica	NA	NA	NA	NA	NA
TR42206|c0_g3_i4	55.1543	209.304	1.92405	0.0726209	0.910277	No	PREDICTED: ethanolamine-phosphate cytidylyltransferase-like	Sesamum indicum	NA	NA	NA	NA	NA
TR40640|c1_g1_i2	214.253	812.701	1.92341	0.0564543	0.851604	No	PREDICTED: DEAD-box ATP-dependent RNA helicase 47A	Sesamum indicum	NA	NA	NA	NA	NA
TR36680|c0_g4_i8	31.8198	120.68	1.92318	0.0771269	0.910625	No	NA	NA	NA	NA	NA	NA	NA
TR35978|c2_g2_i4	103.945	394.094	1.92272	0.0621651	0.870608	No	NA	NA	NA	NA	NA	NA	NA
TR27948|c0_g1_i2	80.6102	305.47	1.922	0.0656137	0.877327	No	unnamed protein product	Coffea canephora	NA	NA	NA	NA	NA
TR43738|c0_g6_i1	80.6102	305.47	1.922	0.0656137	0.877613	No	hypothetical protein JCGZ_14114	Jatropha curcas	NA	protein import[GO:0017038] ; protein targeting[GO:0006605]	ATP binding[GO:0005524]	intracellular[GO:0005622] ; membrane[GO:0016020]	NA
TR42222|c1_g1_i4	396.687	1502.84	1.92162	0.0622008	0.870811	No	PREDICTED: subtilisin-like protease SBT5.3	Sesamum indicum	NA	NA	NA	NA	NA
TR41043|c0_g9_i3	48.7904	184.791	1.92122	0.0748854	0.910057	No	putative sucrose transport protein SUT1	Nicotiana langsdorffii x Nicotiana sanderae	NA	NA	NA	integral component of membrane[GO:0016021]	NA
TR42748|c1_g1_i11	163.342	618.483	1.92084	0.0575791	0.85015	No	hypothetical protein MIMGU_mgv1a002988mg	Mimulus guttatus	NA	NA	ATP binding[GO:0005524]	integral component of membrane[GO:0016021]	NA
TR38798|c0_g1_i1	65.7609	248.902	1.92027	0.0696163	0.897539	No	hypothetical protein MIMGU_mgv1a004614mg	Mimulus guttatus	NA	metabolic process[GO:0008152]	hydrolase activity, acting on ester bonds[GO:0016788]	NA	NA
TR34552|c0_g2_i4	65.7609	248.902	1.92027	0.0696163	0.89782	No	hypothetical protein OsJ_02139	Oryza sativa Japonica Group	NA	carbohydrate metabolic process[GO:0005975]	isomerase activity[GO:0016853]	NA	NA
TR39774|c0_g1_i3	165.463	626.025	1.91971	0.057644	0.850803	No	PREDICTED: beta-hexosaminidase 2	Sesamum indicum	NA	NA	NA	NA	NA
TR40380|c0_g3_i10	173.948	658.081	1.91961	0.0573953	0.850187	No	hypothetical protein MIMGU_mgv1a005643mg	Mimulus guttatus	NA	NA	NA	integral component of membrane[GO:0016021]	NA
TR2593|c1_g1_i1	99.7021	377.124	1.91934	0.0631911	0.877498	No	PREDICTED: fasciclin-like arabinogalactan protein 13	Sesamum indicum	NA	NA	NA	NA	NA
TR38758|c0_g2_i3	108.187	409.179	1.9192	0.0620969	0.870246	No	PREDICTED: lecithin-cholesterol acyltransferase-like 1	Sesamum indicum	NA	NA	NA	NA	NA
TR2445|c0_g1_i2	224.86	850.414	1.91914	0.0570053	0.847773	No	PREDICTED: protein DEHYDRATION-INDUCED 19 homolog 5-like isoform X2	Sesamum indicum	NA	NA	NA	NA	NA
TR39328|c1_g3_i1	16.9706	64.111	1.91754	0.0531301	0.833285	No	glutathione reductase, partial	Dimocarpus longan	NA	oxidation-reduction process[GO:0055114]	oxidoreductase activity[GO:0016491]	NA	NA
TR33083|c0_g1_i5	25.4558	96.1665	1.91754	0.0736759	0.910443	No	NA	NA	NA	NA	NA	NA	NA
TR40040|c0_g1_i1	25.4558	96.1665	1.91754	0.0736759	0.911265	No	PREDICTED: probable serine/threonine-protein kinase At1g54610	Prunus mume	NA	NA	NA	NA	NA
TR41385|c1_g1_i5	25.4558	96.1665	1.91754	0.0736759	0.91154	No	hypothetical protein MIMGU_mgv1a002797mg	Mimulus guttatus	NA	NA	NA	integral component of membrane[GO:0016021]	NA
TR42989|c1_g10_i1	25.4558	96.1665	1.91754	0.0736759	0.910991	No	NA	NA	NA	NA	NA	NA	NA
TR42999|c0_g7_i5	25.4558	96.1665	1.91754	0.0736759	0.910717	No	hypothetical protein MIMGU_mgv1a002397mg	Mimulus guttatus	NA	protein phosphorylation[GO:0006468]	ATP binding[GO:0005524] ; protein serine/threonine kinase activity[GO:0004674]	integral component of membrane[GO:0016021]	NA
TR40944|c1_g5_i4	33.9411	128.222	1.91754	0.0780187	0.914582	No	PREDICTED: uncharacterized protein LOC105166783	Sesamum indicum	NA	NA	NA	NA	NA
TR3758|c0_g2_i1	42.4264	160.278	1.91754	0.0765456	0.911095	No	PREDICTED: uncharacterized protein LOC105156358	Sesamum indicum	NA	NA	NA	NA	NA
TR23446|c0_g1_i1	50.9117	192.333	1.91754	0.0748948	0.909633	No	cellulose synthase 1B	Salix sachalinensis	NA	cellulose biosynthetic process[GO:0030244]	cellulose synthase (UDP-forming) activity[GO:0016760]	integral component of membrane[GO:0016021]	map00500:Starch and sucrose metabolism(synthase (UDP-forming)[ec:2.4.1.12])
TR7936|c0_g1_i3	50.9117	192.333	1.91754	0.0748948	0.909902	No	NA	NA	NA	NA	NA	NA	NA
TR31925|c1_g1_i5	59.397	224.389	1.91754	0.0721536	0.9083	No	PREDICTED: protein DA1-related 1-like isoform X2	Phoenix dactylifera	NA	NA	NA	NA	NA
TR41088|c0_g4_i2	59.397	224.389	1.91754	0.0721536	0.908578	No	hypothetical protein CISIN_1g0154951mg, partial	Citrus sinensis	NA	metabolic process[GO:0008152]	transferase activity, transferring acyl groups other than amino-acyl groups[GO:0016747]	NA	NA
TR28988|c1_g4_i1	76.3675	288.5	1.91754	0.0670946	0.884744	No	hypothetical protein MIMGU_mgv1a015825mg	Mimulus guttatus	NA	NA	NA	integral component of membrane[GO:0016021]	NA
TR38262|c0_g1_i1	97.5807	367.696	1.91384	0.0642382	0.879842	No	PREDICTED: uncharacterized protein LOC105174880	Sesamum indicum	NA	NA	NA	NA	NA
TR42352|c0_g1_i2	44.5477	167.82	1.91349	0.0767509	0.912481	No	hypothetical protein MIMGU_mgv1a002561mg	Mimulus guttatus	NA	blue light signaling pathway[GO:0009785]	blue light photoreceptor activity[GO:0009882]	NA	NA
TR27590|c0_g1_i2	89.0955	335.64	1.91349	0.0655071	0.877043	No	hypothetical protein MIMGU_mgv1a016344mg	Mimulus guttatus	NA	NA	NA	NA	NA
TR30775|c0_g1_i3	36.0624	135.765	1.91254	0.0785495	0.917401	No	PREDICTED: CCR4-NOT transcription complex subunit 1 isoform X1	Sesamum indicum	NA	NA	NA	NA	NA
TR38252|c0_g1_i1	755.19	2841.63	1.91181	0.0841655	0.928601	No	PREDICTED: probable zinc metalloprotease EGY2, chloroplastic isoform X1	Erythranthe guttatus	NA	NA	NA	NA	NA
TR26216|c0_g1_i6	237.588	893.783	1.91146	0.0580457	0.850618	No	NA	NA	NA	NA	NA	NA	NA
TR40440|c1_g3_i1	27.5772	103.709	1.91099	0.0768848	0.912487	No	NA	NA	NA	NA	NA	NA	NA
TR33639|c1_g1_i4	214.253	805.159	1.90996	0.0580907	0.850974	No	hypothetical protein OsJ_01227	Oryza sativa Japonica Group	NA	NA	calcium ion binding[GO:0005509]	NA	NA
TR43451|c0_g4_i1	46.669	175.362	1.9098	0.0769802	0.909678	No	PREDICTED: valine--tRNA ligase, mitochondrial isoform X1	Sesamum indicum	NA	NA	NA	NA	NA
TR2979|c0_g2_i1	207.889	780.646	1.90885	0.0582377	0.851004	No	PREDICTED: non-specific lipid-transfer protein-like	Sesamum indicum	NA	NA	NA	NA	NA
TR35050|c0_g2_i3	352.139	1321.82	1.90831	0.0617483	0.86773	No	PREDICTED: uncharacterized protein LOC105169824 isoform X1	Sesamum indicum	NA	NA	NA	NA	NA
TR36514|c0_g1_i2	19.0919	71.6535	1.90808	0.0612758	0.868218	No	NA	NA	NA	NA	NA	NA	NA
TR42745|c0_g5_i4	38.1838	143.307	1.90808	0.0788465	0.918259	No	PREDICTED: uncharacterized protein LOC105165458	Sesamum indicum	NA	NA	NA	NA	NA
TR8267|c1_g4_i2	133.643	501.574	1.90808	0.0609327	0.864849	No	PREDICTED: uncharacterized protein LOC106770165 isoform X1	Vigna radiata var. radiata	NA	NA	NA	NA	NA
TR43830|c0_g9_i1	154.856	580.77	1.90704	0.0596943	0.858545	No	NA	NA	NA	NA	NA	NA	NA
TR44208|c1_g1_i4	48.7904	182.905	1.90643	0.077089	0.91044	No	PREDICTED: AP-1 complex subunit gamma-2-like	Sesamum indicum	NA	NA	NA	NA	NA
TR44165|c1_g5_i1	40.3051	150.849	1.90408	0.0790069	0.919085	No	PREDICTED: chaperone protein ClpC, chloroplastic	Malus domestica	NA	NA	NA	NA	NA
TR31472|c1_g1_i1	120.915	452.548	1.90408	0.0626734	0.874745	No	PREDICTED: calcium-dependent protein kinase 10-like	Sesamum indicum	NA	NA	NA	NA	NA
TR30409|c0_g1_i5	82.7315	309.241	1.90222	0.0680381	0.890042	No	NA	NA	NA	NA	NA	NA	NA
TR42208|c1_g11_i1	21.2132	79.196	1.90046	0.0677462	0.888205	No	NA	NA	NA	NA	NA	NA	NA
TR2439|c0_g1_i3	31.8198	118.794	1.90046	0.0803717	0.920365	No	NA	NA	NA	NA	NA	NA	NA
TR35274|c0_g1_i2	31.8198	118.794	1.90046	0.0803717	0.920621	No	hypothetical protein MIMGU_mgv1a011873mg	Mimulus guttatus	NA	NA	NA	NA	NA
TR40002|c0_g3_i3	31.8198	118.794	1.90046	0.0803717	0.920108	No	PREDICTED: riboflavin biosynthesis protein PYRD, chloroplastic	Sesamum indicum	NA	NA	NA	NA	NA
TR32077|c0_g6_i7	42.4264	158.392	1.90046	0.0791042	0.917358	No	PREDICTED: histone H3.2-like isoform X2	Solanum tuberosum	NA	NA	NA	NA	NA
TR35779|c0_g1_i1	42.4264	158.392	1.90046	0.0791042	0.917617	No	hypothetical protein MIMGU_mgv1a011828mg	Mimulus guttatus	NA	oxidation-reduction process[GO:0055114]	oxidoreductase activity[GO:0016491]	NA	NA
TR34789|c0_g1_i1	53.033	197.99	1.90046	0.0768662	0.912795	No	PREDICTED: defective in cullin neddylation protein 1	Sesamum indicum	NA	NA	NA	NA	NA
TR31813|c3_g3_i3	63.6396	237.588	1.90046	0.0732893	0.910045	No	hypothetical protein 0_11649_01	Pinus taeda	NA	microtubule-based process[GO:0007017] ; metabolic process[GO:0008152]	GTP binding[GO:0005525] ; GTPase activity[GO:0003924]	microtubule[GO:0005874]	NA
TR43840|c4_g1_i11	63.6396	237.588	1.90046	0.0732893	0.910321	No	NA	NA	NA	NA	NA	NA	NA
TR37674|c0_g3_i2	74.2462	277.186	1.90046	0.0700883	0.901361	No	hypothetical protein MIMGU_mgv1a004594mg	Mimulus guttatus	NA	oxidation-reduction process[GO:0055114]	heme binding[GO:0020037] ; oxidoreductase activity, acting on paired donors, with incorporation or reduction of molecular oxygen[GO:0016705] ; monooxygenase activity[GO:0004497] ; iron ion binding[GO:0005506]	NA	NA
TR44248|c4_g1_i5	137.886	514.774	1.90046	0.06161	0.866082	No	PREDICTED: subtilisin-like protease	Sesamum indicum	NA	NA	NA	NA	NA
TR42656|c0_g2_i2	97.5807	363.924	1.89897	0.0663143	0.881815	No	nitric oxide-associated protein	Elaeis guineensis	NA	NA	GTP binding[GO:0005525]	NA	NA
TR41187|c0_g1_i3	65.7609	245.13	1.89825	0.0729221	0.910994	No	PREDICTED: cytochrome P450 CYP736A12-like	Sesamum indicum	NA	NA	NA	NA	NA
TR37920|c0_g1_i2	197.283	735.391	1.89825	0.0596451	0.858739	No	hypothetical protein MIMGU_mgv1a011552mg	Mimulus guttatus	NA	NA	NA	integral component of membrane[GO:0016021]	NA
TR39993|c0_g1_i2	243.952	908.868	1.89747	0.0598467	0.858931	No	PREDICTED: uncharacterized protein LOC105160078, partial	Sesamum indicum	NA	NA	NA	NA	NA
TR3056|c0_g1_i1	89.0955	331.869	1.89719	0.0678034	0.888387	No	Eukaryotic translation initiation factor 5A-4	Morus notabilis	NA	translational initiation[GO:0006413] ; translational frameshifting[GO:0006452] ; positive regulation of translational termination[GO:0045905] ; positive regulation of translational elongation[GO:0045901]	translation initiation factor activity[GO:0003743] ; translation elongation factor activity[GO:0003746] ; ribosome binding[GO:0043022]	NA	NA
TR28154|c0_g1_i2	112.43	418.607	1.89657	0.0646774	0.876217	No	late embryogenesis-like protein	Salvia miltiorrhiza	NA	response to desiccation[GO:0009269]	NA	NA	NA
TR33428|c0_g1_i4	33.9411	126.336	1.89616	0.0811681	0.919487	No	NA	NA	NA	NA	NA	NA	NA
TR33751|c1_g1_i3	91.2168	339.411	1.89566	0.0677086	0.887994	No	PREDICTED: serine/threonine-protein kinase At5g01020	Sesamum indicum	NA	NA	NA	NA	NA
TR37181|c0_g1_i2	91.2168	339.411	1.89566	0.0677086	0.888278	No	PREDICTED: lycopene epsilon cyclase, chloroplastic	Sesamum indicum	NA	NA	NA	NA	NA
TR7430|c0_g4_i1	80.6102	299.813	1.89503	0.0694581	0.896343	No	PREDICTED: copper transport protein CCH-like	Sesamum indicum	NA	NA	NA	NA	NA
TR32171|c0_g2_i1	23.3345	86.7384	1.89421	0.0729257	0.910762	No	PREDICTED: uncharacterized protein LOC105167918	Sesamum indicum	NA	NA	NA	NA	NA
TR32888|c0_g9_i4	23.3345	86.7384	1.89421	0.0729257	0.910485	No	PREDICTED: ras-related protein RABC1	Nicotiana tomentosiformis	NA	NA	NA	NA	NA
TR38133|c1_g1_i5	106.066	394.094	1.89358	0.0659087	0.879554	No	PREDICTED: RING finger and CHY zinc finger domain-containing protein 1-like	Sesamum indicum	NA	NA	NA	NA	NA
TR41373|c1_g5_i2	36.0624	133.879	1.89236	0.0815863	0.922444	No	NA	NA	NA	NA	NA	NA	NA
TR26112|c0_g1_i1	108.187	401.637	1.89236	0.0658032	0.878717	No	catalase	Digitalis lanata	NA	cellular oxidant detoxification[GO:0098869] ; oxidation-reduction process[GO:0055114] ; response to oxidative stress[GO:0006979]	heme binding[GO:0020037] ; catalase activity[GO:0004096]	NA	map00380:Tryptophan metabolism(equilase[ec:1.11.1.6]) ; map00630:Glyoxylate and dicarboxylate metabolism(equilase[ec:1.11.1.6]) ; map01130:Biosynthesis of antibiotics(equilase[ec:1.11.1.6])
TR33651|c0_g1_i3	48.7904	181.019	1.89148	0.0793654	0.91935	No	PREDICTED: uncharacterized protein Os08g0359500	Sesamum indicum	NA	NA	NA	NA	NA
TR42081|c1_g3_i1	48.7904	181.019	1.89148	0.0793654	0.91909	No	PREDICTED: serine/threonine-protein kinase SRK2A-like	Sesamum indicum	NA	NA	NA	NA	NA
TR29355|c0_g1_i6	74.2462	275.3	1.89062	0.0715621	0.905013	No	PREDICTED: LOW QUALITY PROTEIN: protein LOW PSII ACCUMULATION 2, chloroplastic	Sesamum indicum	NA	NA	NA	NA	NA
TR30552|c0_g4_i1	86.9741	322.441	1.89038	0.0690972	0.895626	No	RuBisCO subunit binding-protein beta subunit precursor	Arabidopsis thaliana	NA	NA	NA	NA	NA
TR36477|c0_g11_i3	125.158	463.862	1.88995	0.0641781	0.881076	No	NA	NA	NA	NA	NA	NA	NA
TR39750|c11_g2_i1	1052.17	3897.57	1.8892	0.104579	0.961863	No	PREDICTED: uncharacterized protein LOC105177873	Sesamum indicum	NA	NA	NA	NA	NA
TR19546|c0_g2_i1	12.7279	47.1405	1.88897	0.0331169	0.772903	No	PREDICTED: probable serine/threonine-protein kinase At1g54610	Sesamum indicum	NA	NA	NA	NA	NA
TR35657|c0_g4_i3	25.4558	94.2809	1.88897	0.0771529	0.91067	No	hypothetical protein MIMGU_mgv1a002165mg	Mimulus guttatus	NA	protein phosphorylation[GO:0006468]	ATP binding[GO:0005524] ; protein serine/threonine kinase activity[GO:0004674]	NA	NA
TR3242|c0_g2_i3	63.6396	235.702	1.88897	0.075067	0.906365	No	PREDICTED: vesicle-associated protein 1-1	Sesamum indicum	NA	NA	NA	NA	NA
TR37887|c2_g5_i1	91.2168	337.526	1.88763	0.0688664	0.895176	No	PREDICTED: transcription factor LUX	Sesamum indicum	NA	NA	NA	NA	NA
TR33014|c0_g1_i1	770.039	2849.17	1.88754	0.0882177	0.93755	No	PREDICTED: glyceraldehyde-3-phosphate dehydrogenase B, chloroplastic	Sesamum indicum	NA	NA	NA	NA	NA
TR2514|c1_g10_i1	40.3051	148.964	1.88593	0.0817963	0.92431	No	Scaffold attachment factor B1	Medicago truncatula	NA	NA	nucleic acid binding[GO:0003676] ; nucleotide binding[GO:0000166]	NA	NA
TR37991|c0_g1_i2	837.922	3096.18	1.8856	0.0925064	0.942176	No	malate dehydrogenase	Perilla frutescens	Lamiaceae	carbohydrate metabolic process[GO:0005975] ; malate metabolic process[GO:0006108] ; tricarboxylic acid cycle[GO:0006099]	L-malate dehydrogenase activity[GO:0030060]	NA	map00630:Glyoxylate and dicarboxylate metabolism(dehydrogenase[ec:1.1.1.37]) ; map01130:Biosynthesis of antibiotics(dehydrogenase[ec:1.1.1.37]) ; map00720:Carbon fixation pathways in prokaryotes(dehydrogenase[ec:1.1.1.37]) ; map00020:Citrate cycle (TCA cycle)(dehydrogenase[ec:1.1.1.37]) ; map00620:Pyruvate metabolism(dehydrogenase[ec:1.1.1.37]) ; map00270:Cysteine and methionine metabolism(dehydr…
TR43171|c0_g2_i1	2187.08	8077.99	1.88499	0.168069	1.03611	No	PREDICTED: presequence protease 1, chloroplastic/mitochondrial-like	Sesamum indicum	NA	NA	NA	NA	NA
TR35691|c0_g5_i1	27.5772	101.823	1.88452	0.0803943	0.919854	No	NA	NA	NA	NA	NA	NA	NA
TR40317|c1_g5_i1	27.5772	101.823	1.88452	0.0803943	0.919598	No	NA	NA	NA	NA	NA	NA	NA
TR43639|c0_g2_i5	112.43	414.836	1.88351	0.0665227	0.882016	No	PREDICTED: U-box domain-containing protein 44	Sesamum indicum	NA	NA	NA	NA	NA
TR37920|c0_g1_i1	239.709	884.355	1.88334	0.0615816	0.866573	No	hypothetical protein MIMGU_mgv1a011552mg	Mimulus guttatus	NA	NA	NA	integral component of membrane[GO:0016021]	NA
TR38383|c0_g2_i1	84.8528	313.013	1.88319	0.0704599	0.902749	No	NA	NA	NA	NA	NA	NA	NA
TR42436|c0_g9_i1	84.8528	313.013	1.88319	0.0704599	0.902467	No	PREDICTED: LOW QUALITY PROTEIN: calreticulin-like, partial	Malus domestica	NA	NA	NA	NA	NA
TR34720|c0_g3_i3	343.654	1267.14	1.88254	0.064564	0.876994	No	NA	NA	NA	NA	NA	NA	NA
TR35255|c1_g5_i1	854.892	3150.87	1.88193	0.0940109	0.943923	No	PREDICTED: chlorophyll a-b binding protein CP29.1, chloroplastic	Sesamum indicum	NA	NA	NA	NA	NA
TR34360|c0_g1_i6	14.8492	54.6829	1.8807	0.0459154	0.816459	No	hypothetical protein MIMGU_mgv1a012348mg	Mimulus guttatus	NA	metabolic process[GO:0008152]	catalytic activity[GO:0003824]	NA	NA
TR39654|c0_g1_i4	14.8492	54.6829	1.8807	0.0459154	0.816813	No	PREDICTED: uncharacterized protein LOC105159651	Sesamum indicum	NA	NA	NA	NA	NA
TR40313|c0_g5_i1	14.8492	54.6829	1.8807	0.0459154	0.816106	No	PREDICTED: serine/threonine-protein phosphatase 7	Sesamum indicum	NA	NA	NA	NA	NA
TR28332|c0_g2_i1	29.6985	109.366	1.8807	0.082499	0.923863	No	PREDICTED: E3 ubiquitin-protein ligase At1g63170-like	Sesamum indicum	NA	NA	NA	NA	NA
TR42717|c0_g1_i1	29.6985	109.366	1.8807	0.082499	0.924115	No	PREDICTED: uncharacterized protein LOC105158309	Sesamum indicum	NA	NA	NA	NA	NA
TR35174|c0_g1_i7	59.397	218.732	1.8807	0.077846	0.913601	No	PREDICTED: glucan endo-1,3-beta-glucosidase-like	Sesamum indicum	NA	NA	NA	NA	NA
TR25813|c0_g1_i2	76.3675	280.957	1.87932	0.0727403	0.910939	No	hypothetical protein MIMGU_mgv1a0056112mg, partial	Mimulus guttatus	NA	D-xylose metabolic process[GO:0042732] ; pentose-phosphate shunt[GO:0006098]	metal ion binding[GO:0046872] ; xylose isomerase activity[GO:0009045]	NA	map00051:Fructose and mannose metabolism(isomerase[ec:5.3.1.5]) ; map00040:Pentose and glucuronate interconversions(isomerase[ec:5.3.1.5])
TR2294|c0_g4_i3	61.5183	226.274	1.87898	0.0773768	0.912264	No	NA	NA	NA	NA	NA	NA	NA
TR8220|c0_g3_i2	93.3381	343.182	1.87844	0.0698947	0.899434	No	NA	NA	NA	NA	NA	NA	NA
TR3872|c0_g1_i2	125.158	460.091	1.87817	0.0658335	0.878836	No	PREDICTED: autophagy-related protein 8C-like	Sesamum indicum	NA	NA	NA	NA	NA
TR3917|c4_g2_i2	31.8198	116.908	1.87738	0.0837742	0.929527	No	hypothetical protein MIMGU_mgv1a000542mg	Mimulus guttatus	NA	phosphorylation[GO:0016310]	protein kinase activity[GO:0004672] ; nucleotide binding[GO:0000166]	membrane[GO:0016020]	NA
TR31399|c0_g2_i4	31.8198	116.908	1.87738	0.0837742	0.929778	No	PREDICTED: transcription factor PRE1-like	Sesamum indicum	NA	NA	NA	NA	NA
TR27937|c0_g1_i4	65.7609	241.359	1.87588	0.07641	0.912124	No	NA	NA	NA	NA	NA	NA	NA
TR35296|c0_g8_i7	1009.75	3703.35	1.87484	0.10412	0.959792	No	PREDICTED: aquaporin TIP1-1-like	Sesamum indicum	NA	NA	NA	NA	NA
TR43857|c0_g2_i1	16.9706	62.2254	1.87447	0.0565663	0.84986	No	hypothetical protein MIMGU_mgv1a001986mg	Mimulus guttatus	NA	metabolic process[GO:0008152]	uridylyltransferase activity[GO:0070569]	NA	NA
TR22707|c0_g1_i1	16.9706	62.2254	1.87447	0.0565663	0.850171	No	unnamed protein product	Coffea canephora	NA	NA	protein dimerization activity[GO:0046983]	NA	NA
TR43857|c0_g1_i1	84.8528	311.127	1.87447	0.0717514	0.906291	No	hypothetical protein MIMGU_mgv1a001986mg	Mimulus guttatus	NA	metabolic process[GO:0008152]	uridylyltransferase activity[GO:0070569]	NA	NA
TR43328|c1_g2_i1	844.285	3090.53	1.87205	0.0947431	0.945727	No	PREDICTED: calcium permeable stress-gated cation channel 1-like	Sesamum indicum	NA	NA	NA	NA	NA
TR42145|c0_g1_i1	55.1543	201.761	1.8711	0.0808299	0.91946	No	NA	NA	NA	NA	NA	NA	NA
TR32514|c2_g1_i4	258.801	946.58	1.87088	0.0634707	0.87782	No	hypothetical protein MIMGU_mgv1a013669mg	Mimulus guttatus	NA	NA	zinc ion binding[GO:0008270]	NA	NA
TR33439|c0_g5_i8	167.584	612.826	1.87059	0.0640003	0.879517	No	unknown	Lotus japonicus	NA	photosynthesis, light harvesting[GO:0009765] ; protein-chromophore linkage[GO:0018298]	chlorophyll binding[GO:0016168]	photosystem II[GO:0009523] ; integral component of membrane[GO:0016021] ; chloroplast[GO:0009507]	NA
TR32652|c3_g3_i1	19.0919	69.7679	1.8696	0.0649675	0.877254	No	PREDICTED: prohibitin-3, mitochondrial-like	Solanum tuberosum	NA	NA	NA	membrane[GO:0016020]	NA
TR8050|c1_g2_i1	19.0919	69.7679	1.8696	0.0649675	0.876965	No	PREDICTED: LOW QUALITY PROTEIN: transmembrane 9 superfamily member 12-like	Sesamum indicum	NA	NA	NA	NA	NA
TR2543|c1_g1_i3	38.1838	139.536	1.8696	0.0848046	0.931151	No	NA	NA	NA	NA	NA	NA	NA
TR38608|c0_g1_i4	57.2756	209.304	1.8696	0.0803646	0.921054	No	PREDICTED: probable pectinesterase/pectinesterase inhibitor 12	Sesamum indicum	NA	NA	NA	NA	NA
TR34875|c0_g3_i3	76.3675	279.071	1.8696	0.0742391	0.910554	No	arsenical pump-driving ATPase-like protein	Medicago truncatula	NA	metabolic process[GO:0008152]	ATPase activity[GO:0016887] ; ATP binding[GO:0005524]	NA	map00230:Purine metabolism(adenylpyrophosphatase[ec:3.6.1.3])
TR43014|c2_g4_i1	59.397	216.846	1.86821	0.0798552	0.921127	No	hypothetical protein MIMGU_mgv1a003606mg	Mimulus guttatus	NA	one-carbon metabolic process[GO:0006730]	adenosylhomocysteinase activity[GO:0004013]	NA	map00270:Cysteine and methionine metabolism(S-adenosylhomocysteine synthase[ec:3.3.1.1])
TR2545|c1_g4_i2	61.5183	224.389	1.86691	0.0793196	0.919079	No	PREDICTED: LOW QUALITY PROTEIN: ATP-dependent Clp protease ATP-binding subunit clpA homolog CD4B, chloroplastic	Sesamum indicum	NA	NA	NA	NA	NA
TR34371|c2_g1_i3	250.316	912.639	1.8663	0.0639338	0.879486	No	PREDICTED: uncharacterized protein LOC105165426	Sesamum indicum	NA	NA	NA	NA	NA
TR35683|c0_g4_i1	21.2132	77.3103	1.8657	0.0715317	0.905745	No	NA	NA	NA	NA	NA	NA	NA
TR38495|c0_g5_i1	21.2132	77.3103	1.8657	0.0715317	0.905466	No	PREDICTED: protein TIC 21, chloroplastic	Sesamum indicum	NA	NA	NA	NA	NA
TR42144|c0_g5_i4	21.2132	77.3103	1.8657	0.0715317	0.905187	No	hypothetical protein MIMGU_mgv1a020096mg, partial	Mimulus guttatus	NA	GDP metabolic process[GO:0046710] ; GMP metabolic process[GO:0046037]	guanylate kinase activity[GO:0004385]	NA	map00230:Purine metabolism(kinase[ec:2.7.4.8])
TR38392|c0_g8_i2	21.2132	77.3103	1.8657	0.0715317	0.904908	No	NA	NA	NA	NA	NA	NA	NA
TR36913|c1_g3_i4	42.4264	154.621	1.8657	0.084541	0.929996	No	NA	NA	NA	NA	NA	NA	NA
TR37022|c0_g2_i1	42.4264	154.621	1.8657	0.084541	0.930245	No	PREDICTED: peptide chain release factor PrfB3, chloroplastic isoform X2	Sesamum indicum	NA	NA	NA	NA	NA
TR43088|c0_g1_i2	42.4264	154.621	1.8657	0.084541	0.930494	No	NA	NA	NA	NA	NA	NA	NA
TR40244|c1_g1_i2	44.5477	162.163	1.86402	0.0843752	0.929915	No	PREDICTED: putative F-box/LRR-repeat protein At3g42770	Erythranthe guttatus	NA	NA	NA	NA	NA
TR36166|c0_g3_i2	89.0955	324.326	1.86402	0.0726808	0.910471	No	PREDICTED: serine/threonine-protein phosphatase PP1 isozyme 3 isoform X1	Sesamum indicum	NA	NA	NA	NA	NA
TR3237|c0_g2_i1	23.3345	84.8528	1.8625	0.0767001	0.91214	No	PREDICTED: uncharacterized protein LOC105175296	Sesamum indicum	NA	NA	NA	NA	NA
TR38075|c0_g11_i1	23.3345	84.8528	1.8625	0.0767001	0.912405	No	NA	NA	NA	NA	NA	NA	NA
TR41258|c0_g3_i1	46.669	169.706	1.8625	0.0842517	0.929303	No	hypothetical protein B456_005G001500	Gossypium raimondii	NA	protein phosphorylation[GO:0006468]	protein kinase activity[GO:0004672] ; ATP binding[GO:0005524]	NA	NA
TR42093|c0_g2_i3	46.669	169.706	1.8625	0.0842517	0.929053	No	cytochrome P450 CYP71AU51	Salvia miltiorrhiza	NA	oxidation-reduction process[GO:0055114]	heme binding[GO:0020037] ; oxidoreductase activity, acting on paired donors, with incorporation or reduction of molecular oxygen[GO:0016705] ; monooxygenase activity[GO:0004497] ; iron ion binding[GO:0005506]	integral component of membrane[GO:0016021]	NA
TR38097|c0_g1_i2	140.007	509.117	1.8625	0.0667101	0.883361	No	PREDICTED: uncharacterized protein LOC105164004	Sesamum indicum	NA	NA	NA	NA	NA
TR32489|c2_g1_i1	163.342	593.97	1.8625	0.0652948	0.878496	No	hypothetical protein MIMGU_mgv1a005057mg	Mimulus guttatus	NA	NA	NA	NA	NA
TR28938|c2_g1_i1	212.132	771.218	1.86218	0.0642622	0.879292	No	PREDICTED: peptidyl-prolyl cis-trans isomerase FKBP19, chloroplastic	Sesamum indicum	NA	NA	NA	NA	NA
TR32904|c0_g1_i6	212.132	771.218	1.86218	0.0642622	0.878999	No	PREDICTED: translation initiation factor IF-2, chloroplastic isoform X2	Sesamum indicum	NA	NA	NA	NA	NA
TR40523|c0_g4_i1	144.25	524.202	1.86155	0.0665211	0.88228	No	PREDICTED: multicopper oxidase LPR1	Sesamum indicum	NA	NA	NA	NA	NA
TR40442|c0_g1_i2	148.492	539.287	1.86066	0.0663542	0.881774	No	NA	NA	NA	NA	NA	NA	NA
TR2294|c0_g4_i1	25.4558	92.3953	1.85982	0.0808511	0.919446	No	NA	NA	NA	NA	NA	NA	NA
TR41498|c0_g5_i3	25.4558	92.3953	1.85982	0.0808511	0.919191	No	PREDICTED: choline/ethanolaminephosphotransferase 1	Sesamum indicum	NA	NA	NA	NA	NA
TR40754|c0_g1_i5	127.279	461.976	1.85982	0.0682623	0.891556	No	PREDICTED: uncharacterized protein LOC105160781	Sesamum indicum	NA	NA	NA	NA	NA
TR2425|c0_g2_i2	53.033	192.333	1.85864	0.0835144	0.928651	No	NA	NA	NA	NA	NA	NA	NA
TR2951|c0_g3_i6	80.6102	292.271	1.85827	0.0750184	0.906044	No	hypothetical protein MIMGU_mgv1a015014mg	Mimulus guttatus	NA	ubiquitin-dependent protein catabolic process[GO:0006511]	NA	NA	NA
TR42887|c1_g4_i1	108.187	392.209	1.85809	0.0708036	0.904894	No	PREDICTED: zinc finger CCCH domain-containing protein 53	Sesamum indicum	NA	NA	NA	NA	NA
TR32171|c0_g4_i1	27.5772	99.9378	1.85756	0.0840891	0.928007	No	PREDICTED: uncharacterized protein LOC105167918	Sesamum indicum	NA	NA	NA	NA	NA
TR33175|c0_g3_i2	27.5772	99.9378	1.85756	0.0840891	0.928257	No	FKBP-like peptidyl-prolyl cis-trans isomerase family protein isoform 2	Theobroma cacao	NA	protein peptidyl-prolyl isomerization[GO:0000413] ; protein folding[GO:0006457] ; cellular response to water deprivation[GO:0042631]	peptidyl-prolyl cis-trans isomerase activity[GO:0003755]	chloroplast thylakoid membrane[GO:0009535]	NA
TR41268|c2_g4_i4	27.5772	99.9378	1.85756	0.0840891	0.928506	No	PREDICTED: uncharacterized protein LOC105164092	Sesamum indicum	NA	NA	NA	NA	NA
TR41584|c1_g2_i2	27.5772	99.9378	1.85756	0.0840891	0.928756	No	PREDICTED: replication protein A 70 kDa DNA-binding subunit B	Nicotiana tomentosiformis	NA	NA	NA	NA	NA
TR34973|c1_g8_i1	27.5772	99.9378	1.85756	0.0840891	0.929006	No	PREDICTED: uncharacterized protein LOC105175213	Sesamum indicum	NA	NA	NA	NA	NA
TR3983|c0_g1_i1	82.7315	299.813	1.85756	0.0746998	0.908338	No	PREDICTED: uncharacterized protein LOC105165125	Sesamum indicum	NA	NA	NA	NA	NA
TR29587|c0_g1_i4	29.6985	107.48	1.85561	0.0861544	0.937452	No	PREDICTED: uncharacterized protein LOC100258452	Vitis vinifera	NA	NA	NA	NA	NA
TR41853|c1_g5_i1	29.6985	107.48	1.85561	0.0861544	0.937203	No	PREDICTED: RNA polymerase sigma factor sigF, chloroplastic isoform X2	Sesamum indicum	NA	NA	NA	NA	NA
TR41507|c1_g2_i4	120.915	437.463	1.85517	0.0696446	0.897622	No	NA	NA	NA	NA	NA	NA	NA
TR30978|c1_g1_i5	1130.66	4089.91	1.8549	0.114085	0.976893	No	PREDICTED: 30S ribosomal protein S17, chloroplastic	Sesamum indicum	NA	NA	NA	NA	NA
TR43014|c4_g3_i4	229.103	827.786	1.85326	0.0654746	0.877181	No	unnamed protein product	Coffea canephora	NA	one-carbon metabolic process[GO:0006730]	adenosylhomocysteinase activity[GO:0004013]	NA	map00270:Cysteine and methionine metabolism(S-adenosylhomocysteine synthase[ec:3.3.1.1])
TR30923|c0_g3_i1	33.9411	122.565	1.85244	0.0879183	0.937764	No	PREDICTED: clustered mitochondria protein-like, partial	Erythranthe guttatus	NA	NA	NA	NA	NA
TR37212|c0_g5_i1	33.9411	122.565	1.85244	0.0879183	0.937521	No	PREDICTED: probable prolyl 4-hydroxylase 9	Sesamum indicum	NA	NA	NA	NA	NA
TR34514|c0_g1_i1	250.316	903.211	1.85131	0.0659379	0.879658	No	PREDICTED: LOW QUALITY PROTEIN: ribose-phosphate pyrophosphokinase 1-like	Erythranthe guttatus	NA	NA	NA	NA	NA
TR36507|c0_g1_i2	72.1249	260.215	1.85114	0.0783574	0.915939	No	hypothetical protein MIMGU_mgv1a008497mg	Mimulus guttatus	NA	cell redox homeostasis[GO:0045454]	NA	cell[GO:0005623]	NA
TR41920|c0_g3_i6	72.1249	260.215	1.85114	0.0783574	0.915678	No	NA	NA	NA	NA	NA	NA	NA
TR31705|c0_g2_i1	108.187	390.323	1.85114	0.0718559	0.907053	No	NA	NA	NA	NA	NA	NA	NA
TR36250|c0_g1_i4	553.665	1996.87	1.85066	0.0800603	0.920648	No	PREDICTED: putative ion channel POLLUX-like 2 isoform X2	Sesamum indicum	NA	NA	NA	NA	NA
TR40469|c0_g2_i3	38.1838	137.65	1.84997	0.0879819	0.93674	No	PREDICTED: protein ASPARTIC PROTEASE IN GUARD CELL 2-like	Sesamum indicum	NA	NA	NA	NA	NA
TR35227|c1_g4_i4	691.55	2492.79	1.84985	0.0886363	0.936908	No	NA	NA	NA	NA	NA	NA	NA
TR38691|c2_g1_i1	78.4889	282.843	1.84944	0.0768995	0.912135	No	vacuolar invertase NvINV	Elsholtzia haichowensis	NA	carbohydrate metabolic process[GO:0005975]	sucrose alpha-glucosidase activity[GO:0004575]	integral component of membrane[GO:0016021]	map00500:Starch and sucrose metabolism(alpha-glucosidase[ec:3.2.1.48]) ; map00500:Starch and sucrose metabolism(invertase[ec:3.2.1.26]) ; map00052:Galactose metabolism(invertase[ec:3.2.1.26])
TR38823|c0_g1_i6	78.4889	282.843	1.84944	0.0768995	0.911872	No	NA	NA	NA	NA	NA	NA	NA
TR8283|c1_g2_i6	118.794	428.035	1.84927	0.0707781	0.90485	No	PREDICTED: GPI ethanolamine phosphate transferase 3 isoform X1	Erythranthe guttatus	NA	NA	NA	NA	NA
TR35064|c0_g1_i7	40.3051	145.193	1.84893	0.0877364	0.938994	No	PREDICTED: histone deacetylase 14 isoform X2	Sesamum indicum	NA	NA	NA	NA	NA
TR33751|c1_g1_i6	42.4264	152.735	1.848	0.0874289	0.940359	No	NA	NA	NA	NA	NA	NA	NA
TR42502|c1_g1_i2	144.25	518.545	1.8459	0.0687919	0.895341	No	PREDICTED: linoleate 13S-lipoxygenase 2-1, chloroplastic-like	Sesamum indicum	NA	NA	NA	NA	NA
TR39953|c0_g2_i1	48.7904	175.362	1.84567	0.0866585	0.939452	No	PREDICTED: aspartic proteinase-like protein 1 isoform X2	Sesamum indicum	NA	NA	NA	NA	NA
TR29778|c0_g4_i4	97.5807	350.725	1.84567	0.0742176	0.910563	No	hypothetical protein MIMGU_mgv1a003644mg	Mimulus guttatus	NA	regulation of transcription, DNA-templated[GO:0006355] ; transcription, DNA-templated[GO:0006351]	transcription factor activity, transcription factor binding[GO:0000989]	nucleus[GO:0005634]	NA
TR36049|c3_g1_i2	197.283	708.992	1.84551	0.0667015	0.883532	No	PREDICTED: uncharacterized protein LOC105156041	Sesamum indicum	NA	NA	NA	NA	NA
TR31333|c0_g1_i1	161.22	578.885	1.84424	0.0679887	0.88968	No	PREDICTED: copper transport protein CCH-like	Sesamum indicum	NA	NA	NA	NA	NA
TR38972|c1_g7_i1	59.397	213.075	1.8429	0.0840521	0.928847	No	PREDICTED: uncharacterized protein LOC105172351	Sesamum indicum	NA	NA	NA	NA	NA
TR3818|c0_g1_i1	184.555	661.852	1.84246	0.0673912	0.886096	No	PREDICTED: cytokinin riboside 5'-monophosphate phosphoribohydrolase LOG8-like	Sesamum indicum	NA	NA	NA	NA	NA
TR7972|c2_g5_i2	125.158	448.777	1.84225	0.0711088	0.904572	No	NA	NA	NA	NA	NA	NA	NA
TR35123|c0_g1_i1	63.6396	228.16	1.84205	0.0826882	0.924973	No	PREDICTED: uncharacterized protein LOC105171158	Sesamum indicum	NA	NA	NA	NA	NA
TR41355|c1_g1_i3	63.6396	228.16	1.84205	0.0826882	0.925225	No	PREDICTED: beta-amylase 1, chloroplastic-like	Pyrus x bretschneideri	NA	NA	NA	NA	NA
TR35457|c0_g2_i8	129.401	463.862	1.84185	0.0707179	0.904643	No	PREDICTED: uncharacterized protein LOC105163765 isoform X2	Sesamum indicum	NA	NA	NA	NA	NA
TR41328|c1_g3_i5	65.7609	235.702	1.84166	0.0820074	0.92314	No	PREDICTED: 4-hydroxy-tetrahydrodipicolinate synthase, chloroplastic-like	Sesamum indicum	NA	NA	NA	NA	NA
TR38009|c0_g1_i1	135.765	486.489	1.8413	0.0701835	0.901174	No	NA	NA	NA	NA	NA	NA	NA
TR32741|c1_g1_i1	178.191	637.339	1.83864	0.0681212	0.890562	No	PREDICTED: ethylene-responsive transcription factor ERF060	Sesamum indicum	NA	NA	NA	NA	NA
TR39579|c2_g1_i3	97.5807	348.839	1.83789	0.0754334	0.905994	No	PREDICTED: mitogen-activated protein kinase kinase 9-like	Sesamum indicum	NA	NA	NA	NA	NA
TR32839|c0_g2_i1	239.709	856.071	1.83644	0.0678671	0.888937	No	PREDICTED: homeobox-leucine zipper protein HAT22-like	Sesamum indicum	NA	NA	NA	NA	NA
TR34629|c0_g1_i3	142.128	507.231	1.83545	0.0705137	0.902874	No	PREDICTED: acyl-[acyl-carrier-protein] desaturase, chloroplastic	Sesamum indicum	NA	NA	NA	NA	NA
TR30619|c0_g1_i6	197.283	703.336	1.83395	0.0683433	0.892046	No	PREDICTED: uncharacterized protein LOC105173291	Sesamum indicum	NA	NA	NA	NA	NA
TR34994|c3_g1_i1	823.072	2934.02	1.83379	0.098928	0.958614	No	PREDICTED: amino acid permease 2-like	Sesamum indicum	NA	NA	NA	NA	NA
TR34046|c0_g6_i3	10.6066	37.7124	1.83007	0.0215676	0.714444	No	PREDICTED: uncharacterized protein LOC105164603	Sesamum indicum	NA	NA	NA	NA	NA
TR40440|c1_g7_i1	12.7279	45.2548	1.83007	0.0357103	0.783986	No	NA	NA	NA	NA	NA	NA	NA
TR40514|c0_g2_i1	12.7279	45.2548	1.83007	0.0357103	0.783567	No	hypothetical protein M569_08604, partial	Genlisea aurea	NA	NA	NA	NA	NA
TR41480|c0_g3_i1	12.7279	45.2548	1.83007	0.0357103	0.784405	No	PREDICTED: lipase-like PAD4	Erythranthe guttatus	NA	NA	NA	NA	NA
TR44060|c0_g8_i1	12.7279	45.2548	1.83007	0.0357103	0.784824	No	hypothetical protein MIMGU_mgv1a002263mg	Mimulus guttatus	NA	intracellular protein transport[GO:0006886]	NA	intracellular[GO:0005622]	NA
TR34628|c0_g4_i3	14.8492	52.7973	1.83007	0.049175	0.825803	No	NA	NA	NA	NA	NA	NA	NA
TR34683|c0_g4_i1	14.8492	52.7973	1.83007	0.049175	0.826141	No	PREDICTED: nitrilase-like protein 2	Sesamum indicum	NA	NA	NA	NA	NA
TR35502|c1_g6_i1	14.8492	52.7973	1.83007	0.049175	0.826479	No	hypothetical protein MIMGU_mgv1a010046mg	Mimulus guttatus	NA	NA	NA	NA	NA
TR42320|c0_g2_i1	16.9706	60.3398	1.83007	0.0603263	0.8619	No	PREDICTED: FGGY carbohydrate kinase domain-containing protein isoform X2	Sesamum indicum	NA	NA	NA	NA	NA
TR37263|c3_g4_i2	19.0919	67.8823	1.83007	0.0689715	0.895409	No	hypothetical protein MIMGU_mgv1a004346mg	Mimulus guttatus	NA	NA	NA	membrane[GO:0016020]	NA
TR42805|c0_g4_i1	19.0919	67.8823	1.83007	0.0689715	0.895692	No	PREDICTED: tryptophan--tRNA ligase, mitochondrial isoform X2	Sesamum indicum	NA	NA	NA	NA	NA
TR38038|c0_g5_i1	21.2132	75.4247	1.83007	0.0756085	0.907832	No	PREDICTED: uncharacterized protein LOC105163785	Sesamum indicum	NA	NA	NA	NA	NA
TR35759|c3_g1_i1	23.3345	82.9672	1.83007	0.0807414	0.919981	No	PREDICTED: PRA1 family protein F3-like	Solanum tuberosum	NA	vesicle-mediated transport[GO:0016192]	NA	integral component of membrane[GO:0016021]	NA
TR37650|c2_g1_i12	23.3345	82.9672	1.83007	0.0807414	0.919471	No	PREDICTED: protein ROOT HAIR DEFECTIVE 3 homolog 2-like	Citrus sinensis	NA	NA	NA	NA	NA
TR43633|c1_g1_i11	23.3345	82.9672	1.83007	0.0807414	0.919216	No	transducin/WD40 repeat-like superfamily protein, partial	Carica papaya	NA	NA	NA	NA	NA
TR43636|c0_g8_i1	23.3345	82.9672	1.83007	0.0807414	0.919726	No	NA	NA	NA	NA	NA	NA	NA
TR28662|c0_g1_i1	23.3345	82.9672	1.83007	0.0807414	0.918961	No	hypothetical protein MIMGU_mgv1a020357mg	Mimulus guttatus	NA	NA	NA	NA	NA
TR26611|c1_g1_i2	27.5772	98.0521	1.83007	0.087981	0.936974	No	PREDICTED: inositol hexakisphosphate and diphosphoinositol-pentakisphosphate kinase 2-like isoform X1	Sesamum indicum	NA	NA	NA	NA	NA
TR43892|c0_g2_i1	29.6985	105.595	1.83007	0.0899972	0.939447	No	PREDICTED: TPR repeat-containing thioredoxin TTL1-like	Sesamum indicum	NA	NA	NA	NA	NA
TR26711|c0_g2_i1	31.8198	113.137	1.83007	0.0910881	0.941741	No	PREDICTED: protein MODIFIER OF SNC1 1, partial	Sesamum indicum	NA	NA	NA	NA	NA
TR35020|c0_g3_i1	31.8198	113.137	1.83007	0.0910881	0.941267	No	PREDICTED: peptidyl-prolyl cis-trans isomerase FKBP18, chloroplastic	Sesamum indicum	NA	NA	NA	NA	NA
TR40019|c0_g1_i1	31.8198	113.137	1.83007	0.0910881	0.94103	No	PREDICTED: porphobilinogen deaminase, chloroplastic-like	Camelina sativa	NA	NA	NA	NA	NA
TR7858|c0_g1_i1	31.8198	113.137	1.83007	0.0910881	0.941504	No	Basic helix-loop-helix DNA-binding superfamily protein isoform 2	Theobroma cacao	NA	regulation of transcription, DNA-templated[GO:0006355] ; double fertilization forming a zygote and endosperm[GO:0009567]	transcription factor activity, sequence-specific DNA binding[GO:0003700] ; DNA binding[GO:0003677] ; protein dimerization activity[GO:0046983]	plasmodesma[GO:0009506] ; integral component of membrane[GO:0016021]	NA
TR32211|c0_g3_i3	33.9411	120.68	1.83007	0.0915352	0.942567	No	AF363286_1aluminium induced protein	Avicennia marina	NA	NA	NA	NA	NA
TR32849|c1_g1_i1	36.0624	128.222	1.83007	0.0915521	0.942505	No	PREDICTED: 60S ribosomal protein L2, mitochondrial-like	Solanum lycopersicum	NA	cytoplasmic translation[GO:0002181] ; mitochondrial translation[GO:0032543]	RNA binding[GO:0003723] ; structural constituent of ribosome[GO:0003735] ; transferase activity[GO:0016740]	mitochondrial large ribosomal subunit[GO:0005762]	NA
TR33227|c0_g1_i2	40.3051	143.307	1.83007	0.0908984	0.941913	No	PREDICTED: uncharacterized protein LOC105140789 isoform X2	Populus euphratica	NA	NA	NA	NA	NA
TR42174|c0_g2_i1	40.3051	143.307	1.83007	0.0908984	0.941675	No	PREDICTED: glucan endo-1,3-beta-glucosidase 1	Sesamum indicum	NA	NA	NA	NA	NA
TR7359|c0_g2_i2	42.4264	150.849	1.83007	0.0904367	0.941165	No	PREDICTED: stress enhanced protein 1, chloroplastic	Sesamum indicum	NA	NA	NA	NA	NA
TR39238|c0_g1_i1	46.669	165.934	1.83007	0.0895774	0.937447	No	PREDICTED: uncharacterized protein LOC105174161	Sesamum indicum	NA	NA	NA	NA	NA
TR30798|c0_g6_i1	50.9117	181.019	1.83007	0.0888431	0.936444	No	NA	NA	NA	NA	NA	NA	NA
TR40704|c1_g3_i1	50.9117	181.019	1.83007	0.0888431	0.936203	No	PREDICTED: protoheme IX farnesyltransferase, mitochondrial	Sesamum indicum	NA	NA	NA	NA	NA
TR2445|c0_g1_i1	55.1543	196.104	1.83007	0.0876727	0.939291	No	PREDICTED: protein DEHYDRATION-INDUCED 19 homolog 5-like isoform X2	Sesamum indicum	NA	NA	NA	NA	NA
TR32968|c1_g3_i4	55.1543	196.104	1.83007	0.0876727	0.939781	No	NA	NA	NA	NA	NA	NA	NA
TR37084|c0_g1_i1	55.1543	196.104	1.83007	0.0876727	0.939536	No	NA	NA	NA	NA	NA	NA	NA
TR44103|c1_g1_i2	55.1543	196.104	1.83007	0.0876727	0.939046	No	PREDICTED: probable ADP-ribosylation factor GTPase-activating protein AGD14 isoform X3	Sesamum indicum	NA	NA	NA	NA	NA
TR3304|c0_g6_i1	67.8823	241.359	1.83007	0.0832417	0.927879	No	hypothetical protein M569_02083, partial	Genlisea aurea	NA	translation[GO:0006412]	structural constituent of ribosome[GO:0003735]	ribosome[GO:0005840]	NA
TR3986|c0_g3_i15	67.8823	241.359	1.83007	0.0832417	0.927628	No	PREDICTED: short-chain dehydrogenase TIC 32, chloroplastic-like isoform X1	Erythranthe guttatus	NA	NA	NA	NA	NA
TR43122|c1_g5_i4	72.1249	256.444	1.83007	0.0818544	0.923188	No	PREDICTED: probable inactive receptor-like protein kinase At3g56050	Sesamum indicum	NA	NA	NA	NA	NA
TR3857|c0_g3_i1	86.9741	309.241	1.83007	0.0782947	0.915727	No	PREDICTED: outer envelope pore protein 16, chloroplastic	Nicotiana tomentosiformis	NA	NA	NA	NA	NA
TR44072|c5_g1_i2	108.187	384.666	1.83007	0.0751232	0.906776	No	PREDICTED: putative calcium-transporting ATPase 13, plasma membrane-type, partial	Nicotiana sylvestris	NA	NA	NA	NA	NA
TR27415|c0_g1_i2	640.639	2277.83	1.83007	0.0883011	0.937224	No	PREDICTED: photosystem I reaction center subunit N, chloroplastic-like	Fragaria vesca subsp. vesca	NA	NA	NA	NA	NA
TR32428|c1_g2_i3	125.158	443.12	1.82395	0.0739313	0.910039	No	PREDICTED: high mobility group B protein 7-like	Sesamum indicum	NA	NA	NA	NA	NA
TR3986|c0_g3_i16	108.187	382.78	1.82299	0.0762503	0.911277	No	PREDICTED: short-chain dehydrogenase TIC 32, chloroplastic-like isoform X2	Erythranthe guttatus	NA	NA	NA	NA	NA
TR34205|c0_g2_i3	186.676	659.966	1.82185	0.0703279	0.902464	No	PREDICTED: peptidyl-prolyl cis-trans isomerase CYP20-2, chloroplastic	Sesamum indicum	NA	NA	NA	NA	NA
TR3883|c0_g3_i1	78.4889	277.186	1.82029	0.0816906	0.923369	No	PREDICTED: ATP-dependent Clp protease proteolytic subunit 6, chloroplastic-like	Sesamum indicum	NA	NA	NA	NA	NA
TR43721|c1_g2_i4	76.3675	269.643	1.82002	0.0823055	0.923963	No	PREDICTED: phosphatidylinositol/phosphatidylcholine transfer protein SFH13-like	Sesamum indicum	NA	NA	NA	NA	NA
TR35041|c0_g9_i2	74.2462	262.101	1.81973	0.0829665	0.926321	No	PREDICTED: probable ribose-5-phosphate isomerase 3, chloroplastic	Sesamum indicum	NA	NA	NA	NA	NA
TR38702|c1_g3_i4	74.2462	262.101	1.81973	0.0829665	0.926572	No	PREDICTED: transcription factor MYC4-like	Sesamum indicum	NA	NA	NA	NA	NA
TR27479|c0_g4_i1	146.371	516.659	1.81958	0.0725941	0.910218	No	PREDICTED: stress-associated endoplasmic reticulum protein 2-like	Malus domestica	NA	NA	NA	NA	NA
TR42748|c1_g1_i1	195.161	688.251	1.81827	0.0706674	0.90456	No	hypothetical protein MIMGU_mgv1a002988mg	Mimulus guttatus	NA	NA	ATP binding[GO:0005524]	integral component of membrane[GO:0016021]	NA
TR33261|c1_g2_i1	53.033	186.676	1.81558	0.0908139	0.943178	No	PREDICTED: uncharacterized protein LOC105169149	Sesamum indicum	NA	NA	NA	NA	NA
TR40814|c0_g3_i2	53.033	186.676	1.81558	0.0908139	0.942701	No	PREDICTED: two-component response regulator-like APRR9	Sesamum indicum	NA	NA	NA	NA	NA
TR41194|c0_g1_i7	53.033	186.676	1.81558	0.0908139	0.94294	No	PREDICTED: pentatricopeptide repeat-containing protein At1g62720-like	Sesamum indicum	NA	NA	NA	NA	NA
TR8195|c1_g4_i1	53.033	186.676	1.81558	0.0908139	0.943417	No	PREDICTED: uncharacterized protein LOC105176694	Sesamum indicum	NA	NA	NA	NA	NA
TR44194|c2_g2_i3	106.066	373.352	1.81558	0.0777476	0.913228	No	PREDICTED: probable leucine-rich repeat receptor-like serine/threonine-protein kinase At3g14840, partial	Sesamum indicum	NA	NA	NA	NA	NA
TR42285|c0_g8_i4	50.9117	179.134	1.81497	0.0914397	0.942055	No	hypothetical protein POPTR_0011s05250g	Populus trichocarpa	NA	isoleucine biosynthetic process[GO:0009097] ; valine biosynthetic process[GO:0009099] ; oxidation-reduction process[GO:0055114]	ketol-acid reductoisomerase activity[GO:0004455] ; metal ion binding[GO:0046872]	NA	map00290:Valine, leucine and isoleucine biosynthesis(reductoisomerase (NADP+)[ec:1.1.1.86]) ; map01130:Biosynthesis of antibiotics(reductoisomerase (NADP+)[ec:1.1.1.86]) ; map00770:Pantothenate and CoA biosynthesis(reductoisomerase (NADP+)[ec:1.1.1.86])
TR42301|c1_g3_i2	50.9117	179.134	1.81497	0.0914397	0.942292	No	PREDICTED: cytochrome P450 CYP72A219-like	Sesamum indicum	NA	NA	NA	NA	NA
TR40184|c0_g1_i2	305.47	1074.8	1.81497	0.0722658	0.909433	No	PREDICTED: probable starch synthase 4, chloroplastic/amyloplastic isoform X1	Sesamum indicum	NA	NA	NA	NA	NA
TR33089|c0_g3_i1	46.669	164.049	1.81359	0.0923973	0.941999	No	NA	NA	NA	NA	NA	NA	NA
TR43264|c0_g5_i2	46.669	164.049	1.81359	0.0923973	0.942233	No	hypothetical protein MIMGU_mgv1a002033mg	Mimulus guttatus	NA	lipid metabolic process[GO:0006629]	hydrolase activity[GO:0016787]	integral component of membrane[GO:0016021]	NA
TR33020|c0_g6_i3	689.429	2423.02	1.81333	0.0937555	0.943666	No	hypothetical protein MIMGU_mgv1a014490mg	Mimulus guttatus	NA	translation[GO:0006412]	structural constituent of ribosome[GO:0003735]	ribosome[GO:0005840]	NA
TR41876|c1_g2_i2	135.765	477.061	1.81307	0.0745291	0.908684	No	unnamed protein product	Vitis vinifera	NA	transport[GO:0006810]	transporter activity[GO:0005215]	integral component of membrane[GO:0016021]	NA
TR43355|c0_g1_i7	135.765	477.061	1.81307	0.0745291	0.908415	No	NA	NA	NA	NA	NA	NA	NA
TR33426|c0_g1_i6	44.5477	156.506	1.8128	0.0929535	0.945322	No	hypothetical protein MIMGU_mgv1a0026502mg, partial	Mimulus guttatus	NA	NA	NA	membrane[GO:0016020]	NA
TR40936|c0_g2_i2	44.5477	156.506	1.8128	0.0929535	0.945088	No	PREDICTED: homeobox-leucine zipper protein GLABRA 2	Sesamum indicum	NA	NA	NA	NA	NA
TR35643|c1_g7_i3	86.9741	305.47	1.81237	0.0811882	0.919461	No	PREDICTED: protein Iojap, chloroplastic	Sesamum indicum	NA	NA	NA	NA	NA
TR31726|c0_g1_i2	341.533	1199.25	1.81204	0.0739544	0.910051	No	NA	NA	NA	NA	NA	NA	NA
TR36479|c1_g2_i3	42.4264	148.964	1.81193	0.0935698	0.943878	No	PREDICTED: triadin-like	Erythranthe guttatus	NA	NA	NA	NA	NA
TR36518|c2_g3_i5	42.4264	148.964	1.81193	0.0935698	0.94411	No	basic helix-loop-helix transcription factor	Salvia miltiorrhiza	NA	NA	protein dimerization activity[GO:0046983]	NA	NA
TR39705|c0_g1_i6	1444.62	5070.43	1.81142	0.13904	1.01137	No	cytochrome P450 CYP74B21	Salvia miltiorrhiza	NA	oxidation-reduction process[GO:0055114]	heme binding[GO:0020037] ; oxidoreductase activity, acting on paired donors, with incorporation or reduction of molecular oxygen[GO:0016705] ; monooxygenase activity[GO:0004497] ; iron ion binding[GO:0005506]	NA	NA
TR3227|c0_g2_i14	120.915	424.264	1.81097	0.0764971	0.912102	No	PREDICTED: gamma-glutamyl hydrolase 2-like	Sesamum indicum	NA	NA	NA	NA	NA
TR37741|c1_g1_i5	156.978	550.6	1.81045	0.073278	0.910456	No	PREDICTED: ELMO domain-containing protein C-like isoform X1	Nicotiana sylvestris	NA	NA	NA	NA	NA
TR19748|c0_g1_i1	38.1838	133.879	1.8099	0.0947655	0.945491	No	PREDICTED: synaptotagmin-5	Sesamum indicum	NA	NA	NA	NA	NA
TR37900|c0_g7_i1	38.1838	133.879	1.8099	0.0947655	0.945721	No	PREDICTED: uncharacterized protein LOC105158433	Sesamum indicum	NA	NA	NA	NA	NA
TR24537|c0_g1_i1	36.0624	126.336	1.8087	0.0951837	0.946674	No	NA	NA	NA	NA	NA	NA	NA
TR34010|c1_g4_i1	36.0624	126.336	1.8087	0.0951837	0.946445	No	NA	NA	NA	NA	NA	NA	NA
TR41840|c2_g3_i1	36.0624	126.336	1.8087	0.0951837	0.946904	No	PREDICTED: tryptophan--tRNA ligase, cytoplasmic	Sesamum indicum	NA	NA	NA	NA	NA
TR7629|c0_g1_i2	36.0624	126.336	1.8087	0.0951837	0.947133	No	PREDICTED: NADH dehydrogenase [ubiquinone] 1 beta subcomplex subunit 7	Sesamum indicum	NA	NA	NA	NA	NA
TR30679|c0_g6_i2	72.1249	252.673	1.8087	0.0855343	0.935163	No	PREDICTED: ceramide-1-phosphate transfer protein	Sesamum indicum	NA	NA	NA	NA	NA
TR37612|c1_g5_i1	341.533	1195.48	1.8075	0.0746079	0.908028	No	hypothetical protein MIMGU_mgv1a0096341mg	Mimulus guttatus	NA	NA	NA	NA	NA
TR41565|c0_g8_i3	33.9411	118.794	1.80735	0.0953248	0.945103	No	PREDICTED: protein disulfide isomerase-like 1-4, partial	Populus euphratica	NA	NA	NA	NA	NA
TR27695|c1_g1_i1	33.9411	118.794	1.80735	0.0953248	0.945332	No	PREDICTED: uncharacterized protein LOC105167116	Sesamum indicum	NA	NA	NA	NA	NA
TR17067|c0_g1_i1	67.8823	237.588	1.80735	0.0871973	0.941565	No	60S ribosomal protein L34	Zea mays	NA	translation[GO:0006412]	structural constituent of ribosome[GO:0003735]	ribosome[GO:0005840]	NA
TR39082|c2_g3_i3	101.823	356.382	1.80735	0.0797209	0.920094	No	PREDICTED: uncharacterized protein LOC104235970	Nicotiana sylvestris	NA	NA	NA	NA	NA
TR33243|c0_g1_i4	65.7609	230.045	1.80662	0.0880792	0.93729	No	NA	NA	NA	NA	NA	NA	NA
TR38595|c0_g3_i2	197.283	690.136	1.80662	0.0723686	0.909891	No	PREDICTED: peroxisome biogenesis factor 10-like	Sesamum indicum	NA	NA	NA	NA	NA
TR42789|c0_g2_i1	161.22	563.8	1.80615	0.0737009	0.910478	No	PREDICTED: tubulin--tyrosine ligase-like protein 12 isoform X1	Sesamum indicum	NA	NA	NA	NA	NA
TR39166|c0_g2_i2	449.72	1572.61	1.80606	0.0800319	0.920838	No	PREDICTED: lysosomal beta glucosidase-like	Populus euphratica	NA	NA	NA	NA	NA
TR41994|c1_g1_i5	31.8198	111.251	1.80583	0.0950189	0.9471	No	NA	NA	NA	NA	NA	NA	NA
TR34062|c0_g1_i6	159.099	556.257	1.80583	0.0738697	0.909554	No	PREDICTED: probable protein phosphatase 2C 34	Sesamum indicum	NA	NA	NA	NA	NA
TR41075|c0_g2_i3	150.614	526.087	1.80445	0.0746366	0.908108	No	PREDICTED: probable WRKY transcription factor 4	Sesamum indicum	NA	NA	NA	NA	NA
TR31858|c0_g2_i2	29.6985	103.709	1.80408	0.0940385	0.94397	No	PREDICTED: DNA-directed RNA polymerase III subunit RPC7-like	Sesamum indicum	NA	NA	NA	NA	NA
TR42320|c0_g5_i1	29.6985	103.709	1.80408	0.0940385	0.94374	No	PREDICTED: FGGY carbohydrate kinase domain-containing protein isoform X2	Erythranthe guttatus	NA	NA	NA	NA	NA
TR2800|c0_g3_i1	57.2756	199.876	1.80311	0.0917267	0.941941	No	PREDICTED: dihydroflavonol-4-reductase-like	Sesamum indicum	NA	NA	NA	NA	NA
TR40996|c0_g1_i1	630.032	2198.63	1.80311	0.0915671	0.942187	No	PREDICTED: BAG family molecular chaperone regulator 6	Sesamum indicum	NA	NA	NA	NA	NA
TR27864|c0_g1_i4	112.43	392.209	1.80259	0.0789721	0.9192	No	PREDICTED: MADS-box protein SVP-like	Sesamum indicum	NA	NA	NA	NA	NA
TR36720|c0_g1_i1	167.584	584.542	1.80242	0.0739596	0.909843	No	hypothetical protein POPTR_0005s27550g	Populus trichocarpa	NA	oxidation-reduction process[GO:0055114]	oxidoreductase activity, acting on the aldehyde or oxo group of donors, NAD or NADP as acceptor[GO:0016620]	NA	NA
TR34641|c0_g1_i2	27.5772	96.1665	1.80206	0.0920832	0.942304	No	NA	NA	NA	NA	NA	NA	NA
TR3986|c0_g3_i7	27.5772	96.1665	1.80206	0.0920832	0.942539	No	PREDICTED: short-chain dehydrogenase TIC 32, chloroplastic-like	Prunus mume	NA	NA	NA	NA	NA
TR30798|c0_g7_i1	135.765	473.29	1.80162	0.0763556	0.912004	No	NA	NA	NA	NA	NA	NA	NA
TR38377|c0_g1_i1	216.375	754.247	1.80151	0.0729067	0.911357	No	PREDICTED: uncharacterized protein LOC105163461	Sesamum indicum	NA	NA	NA	NA	NA
TR33993|c0_g3_i2	80.6102	280.957	1.80132	0.084399	0.929928	No	PREDICTED: uncharacterized protein LOC105158546	Sesamum indicum	NA	NA	NA	NA	NA
TR32854|c1_g1_i12	78.4889	273.415	1.80053	0.0850819	0.93245	No	PREDICTED: LOW QUALITY PROTEIN: auxin-responsive protein IAA13	Sesamum indicum	NA	NA	NA	NA	NA
TR23348|c0_g1_i2	235.467	820.244	1.80053	0.0730417	0.910826	No	PREDICTED: putative lipid-binding protein At4g00165-like	Solanum lycopersicum	NA	NA	NA	NA	NA
TR37708|c0_g2_i1	25.4558	88.624	1.7997	0.0889941	0.935634	No	hypothetical protein MIMGU_mgv1a027009mg	Mimulus guttatus	NA	NA	NA	NA	NA
TR42215|c0_g3_i1	25.4558	88.624	1.7997	0.0889941	0.936113	No	hypothetical protein MIMGU_mgv1a011704mg	Mimulus guttatus	NA	sodium ion transport[GO:0006814] ; hydrogen ion transmembrane transport[GO:1902600] ; potassium ion homeostasis[GO:0055075] ; response to salt stress[GO:0009651]	solute:proton antiporter activity[GO:0015299]	integral component of membrane[GO:0016021] ; vacuolar membrane[GO:0005774] ; plasma membrane[GO:0005886]	NA
TR8068|c1_g4_i4	25.4558	88.624	1.7997	0.0889941	0.935874	No	PREDICTED: uncharacterized protein LOC105168516 isoform X2	Sesamum indicum	NA	NA	NA	NA	NA
TR38217|c1_g4_i4	50.9117	177.248	1.7997	0.0941215	0.944111	No	PREDICTED: uncharacterized protein LOC105166451	Sesamum indicum	NA	NA	NA	NA	NA
TR2891|c0_g1_i3	252.437	878.698	1.79944	0.0733491	0.909963	No	NA	NA	NA	NA	NA	NA	NA
TR40814|c0_g1_i1	48.7904	169.706	1.79837	0.0947135	0.946812	No	PREDICTED: two-component response regulator-like APRR5 isoform X2	Nicotiana tomentosiformis	NA	NA	NA	NA	NA
TR40490|c1_g3_i10	72.1249	250.787	1.79789	0.087446	0.94005	No	PREDICTED: probable protein phosphatase 2C 55	Sesamum indicum	NA	NA	NA	NA	NA
TR35838|c1_g2_i2	46.669	162.163	1.79691	0.095328	0.944679	No	PREDICTED: uncharacterized protein LOC105170041	Sesamum indicum	NA	NA	NA	NA	NA
TR39450|c0_g1_i1	46.669	162.163	1.79691	0.095328	0.944907	No	NA	NA	NA	NA	NA	NA	NA
TR31039|c0_g2_i2	112.43	390.323	1.79564	0.0801265	0.921152	No	PREDICTED: casein kinase II subunit alpha-like	Sesamum indicum	NA	NA	NA	NA	NA
TR28780|c0_g1_i3	44.5477	154.621	1.79531	0.0960471	0.946779	No	hypothetical protein MIMGU_mgv1a016902mg	Mimulus guttatus	NA	NA	2 iron, 2 sulfur cluster binding[GO:0051537]	intracellular membrane-bounded organelle[GO:0043231]	NA
TR38515|c1_g1_i1	65.7609	228.16	1.79474	0.0902159	0.93982	No	PREDICTED: cyclic nucleotide-gated ion channel 4	Sesamum indicum	NA	NA	NA	NA	NA
TR39216|c2_g1_i9	108.187	375.238	1.79427	0.0809592	0.919149	No	PREDICTED: ATP-dependent zinc metalloprotease FTSH 7, chloroplastic-like	Sesamum indicum	NA	NA	NA	NA	NA
TR43734|c0_g1_i2	322.441	1118.17	1.79404	0.075872	0.909136	No	PREDICTED: ABC transporter G family member 22 isoform X1	Erythranthe guttatus	NA	metabolic process[GO:0008152]	ATPase activity[GO:0016887] ; ATP binding[GO:0005524]	integral component of membrane[GO:0016021]	map00230:Purine metabolism(adenylpyrophosphatase[ec:3.6.1.3])
TR2768|c1_g2_i2	193.04	669.394	1.79396	0.0743946	0.907583	No	AF479058_170 kDa heat shock protein	Sandersonia aurantiaca	NA	NA	ATP binding[GO:0005524]	NA	NA
TR28053|c0_g4_i1	21.2132	73.5391	1.79355	0.0800063	0.921575	No	NA	NA	NA	NA	NA	NA	NA
TR34049|c1_g3_i1	21.2132	73.5391	1.79355	0.0800063	0.921317	No	PREDICTED: uncharacterized protein LOC105109051	Populus euphratica	NA	NA	NA	NA	NA
TR3554|c0_g2_i2	21.2132	73.5391	1.79355	0.0800063	0.921059	No	PREDICTED: probable receptor-like protein kinase At5g24010	Sesamum indicum	NA	NA	NA	NA	NA
TR39653|c0_g2_i2	21.2132	73.5391	1.79355	0.0800063	0.922092	No	NA	NA	NA	NA	NA	NA	NA
TR40571|c0_g4_i2	21.2132	73.5391	1.79355	0.0800063	0.920801	No	PREDICTED: lysosomal Pro-X carboxypeptidase	Sesamum indicum	NA	NA	NA	NA	NA
TR8213|c1_g3_i1	21.2132	73.5391	1.79355	0.0800063	0.921834	No	NA	NA	NA	NA	NA	NA	NA
TR36394|c0_g1_i2	42.4264	147.078	1.79355	0.0968338	0.950202	No	hypothetical protein MIMGU_mgv1a010765mg	Mimulus guttatus	NA	NA	nucleic acid binding[GO:0003676]	nucleus[GO:0005634]	NA
TR38595|c0_g3_i8	63.6396	220.617	1.79355	0.0912031	0.941507	No	hypothetical protein MIMGU_mgv1a012466mg	Mimulus guttatus	NA	NA	zinc ion binding[GO:0008270]	NA	NA
TR30109|c0_g1_i1	11966.4	41477.9	1.79336	0.487093	1.1081	No	hypothetical protein MIMGU_mgv1a013719mg	Mimulus guttatus	NA	NA	manganese ion binding[GO:0030145] ; nutrient reservoir activity[GO:0045735]	extracellular region[GO:0005576]	NA
TR34952|c0_g1_i7	61.5183	213.075	1.79227	0.092207	0.941694	No	PREDICTED: uncharacterized protein LOC105949037	Erythranthe guttatus	NA	NA	NA	NA	NA
TR21292|c0_g1_i1	101.823	352.611	1.79201	0.0822906	0.924048	No	hypothetical protein MIMGU_mgv1a017331mg	Mimulus guttatus	NA	NA	NA	NA	NA
TR42065|c1_g6_i2	59.397	205.532	1.7909	0.0932146	0.944471	No	PREDICTED: uncharacterized protein LOC105160331	Sesamum indicum	NA	NA	NA	NA	NA
TR35040|c0_g1_i1	19.0919	65.9966	1.78943	0.0733245	0.910208	No	NA	NA	NA	NA	NA	NA	NA
TR44164|c4_g12_i1	19.0919	65.9966	1.78943	0.0733245	0.909933	No	PREDICTED: ankyrin repeat-containing protein At5g02620-like	Sesamum indicum	NA	NA	NA	NA	NA
TR44222|c0_g1_i3	57.2756	197.99	1.78943	0.0942099	0.943845	No	hypothetical protein MIMGU_mgv1a000991mg	Mimulus guttatus	NA	NA	NA	NA	NA
TR33670|c0_g2_i1	74.2462	256.444	1.78825	0.0884979	0.938343	No	PREDICTED: peptidyl-prolyl cis-trans isomerase FKBP62	Sesamum indicum	NA	NA	NA	NA	NA
TR30975|c0_g2_i1	55.1543	190.447	1.78785	0.0951724	0.94725	No	NA	NA	NA	NA	NA	NA	NA
TR34874|c1_g2_i1	55.1543	190.447	1.78785	0.0951724	0.94748	No	hypothetical protein MIMGU_mgv1a014667mg	Mimulus guttatus	NA	NA	NA	NA	NA
TR34419|c0_g1_i1	420.021	1450.04	1.78756	0.0811465	0.919496	No	PREDICTED: BI1-like protein	Sesamum indicum	NA	NA	NA	NA	NA
TR44215|c1_g8_i4	36.0624	124.451	1.78701	0.0989835	0.955321	No	PREDICTED: probable galactinol--sucrose galactosyltransferase 2	Sesamum indicum	NA	NA	NA	NA	NA
TR8118|c1_g5_i1	36.0624	124.451	1.78701	0.0989835	0.955096	No	NA	NA	NA	NA	NA	NA	NA
TR33659|c0_g1_i8	72.1249	248.902	1.78701	0.0894074	0.937579	No	PREDICTED: uncharacterized protein LOC105168911	Sesamum indicum	NA	NA	NA	NA	NA
TR32822|c0_g4_i2	161.22	556.257	1.78672	0.076772	0.912467	No	hydroxymethylbutenyl diphosphate reductase	Paeonia lactiflora	NA	dimethylallyl diphosphate biosynthetic process[GO:0050992] ; isopentenyl diphosphate biosynthetic process, methylerythritol 4-phosphate pathway[GO:0019288] ; oxidation-reduction process[GO:0055114]	4-hydroxy-3-methylbut-2-en-1-yl diphosphate reductase activity[GO:0051745] ; metal ion binding[GO:0046872]	NA	NA
TR7501|c0_g2_i1	89.0955	307.356	1.78649	0.0852161	0.933423	No	PREDICTED: plastidic ATP/ADP-transporter	Sesamum indicum	NA	NA	NA	NA	NA
TR2687|c0_g1_i4	123.037	424.264	1.78588	0.0803654	0.920806	No	PREDICTED: uncharacterized protein LOC105157888	Sesamum indicum	NA	NA	NA	NA	NA
TR2743|c0_g2_i1	86.9741	299.813	1.78541	0.0857777	0.936329	No	PREDICTED: uncharacterized protein LOC105164530	Sesamum indicum	NA	NA	NA	NA	NA
TR3016|c3_g4_i1	16.9706	58.4542	1.78427	0.064455	0.876673	No	NA	NA	NA	NA	NA	NA	NA
TR6578|c0_g1_i1	16.9706	58.4542	1.78427	0.064455	0.876964	No	hypothetical protein AMTR_s00007p00246340	Amborella trichopoda	NA	NA	NA	NA	NA
TR33799|c0_g1_i1	82.7315	284.728	1.78308	0.0870859	0.940858	No	protein binding protein, putative	Ricinus communis	NA	NA	NA	NA	NA
TR42038|c1_g1_i1	82.7315	284.728	1.78308	0.0870859	0.941106	No	PREDICTED: uncharacterized protein LOC105162718	Sesamum indicum	NA	NA	NA	NA	NA
TR23052|c0_g2_i1	131.522	452.548	1.78277	0.0798945	0.921322	No	hypothetical protein MIMGU_mgv1a002294mg	Mimulus guttatus	NA	NA	oxidoreductase activity[GO:0016491] ; iron-sulfur cluster binding[GO:0051536]	NA	NA
TR31615|c0_g1_i1	114.551	394.094	1.78255	0.0820422	0.923025	No	PREDICTED: oxygen-evolving enhancer protein 3-2, chloroplastic-like	Vigna radiata var. radiata	NA	NA	NA	NA	NA
TR30087|c0_g1_i5	462.448	1589.58	1.78128	0.0844049	0.929744	No	hypothetical protein SOVF_003690	Spinacia oleracea	NA	NA	NA	NA	NA
TR34671|c0_g1_i3	31.8198	109.366	1.78117	0.0991463	0.955546	No	hypothetical protein MIMGU_mgv1a024146mg	Mimulus guttatus	NA	NA	NA	integral component of membrane[GO:0016021]	NA
TR40405|c1_g4_i1	31.8198	109.366	1.78117	0.0991463	0.955321	No	NA	NA	NA	NA	NA	NA	NA
TR43669|c0_g1_i4	222.739	765.561	1.78117	0.0759966	0.909832	No	NA	NA	NA	NA	NA	NA	NA
TR35296|c0_g8_i9	1482.8	5094.94	1.78074	0.146304	1.02047	No	PREDICTED: aquaporin TIP1-1-like	Sesamum indicum	NA	NA	NA	NA	NA
TR37080|c0_g1_i2	78.4889	269.643	1.78049	0.0886408	0.936714	No	PREDICTED: probable aldo-keto reductase 2 isoform X1	Sesamum indicum	NA	NA	NA	NA	NA
TR39306|c0_g6_i3	169.706	582.656	1.77961	0.0774759	0.912124	No	PREDICTED: diacylglycerol kinase 5	Sesamum indicum	NA	NA	NA	NA	NA
TR41801|c1_g1_i4	61.5183	211.189	1.77945	0.0945775	0.945913	No	PREDICTED: uncharacterized protein LOC105170964	Sesamum indicum	NA	NA	NA	NA	NA
TR43599|c0_g1_i2	165.463	567.571	1.77829	0.0779018	0.913733	No	PREDICTED: sec1 family domain-containing protein MIP3	Sesamum indicum	NA	NA	NA	NA	NA
TR23503|c0_g2_i1	14.8492	50.9117	1.77761	0.0528041	0.834866	No	hypothetical protein MIMGU_mgv1a001891mg	Mimulus guttatus	NA	proteolysis[GO:0006508]	serine-type endopeptidase activity[GO:0004252]	membrane[GO:0016020] ; cell wall[GO:0005618]	NA
TR35050|c0_g2_i4	14.8492	50.9117	1.77761	0.0528041	0.834545	No	hypothetical protein MIMGU_mgv1a014947mg	Mimulus guttatus	NA	NA	NA	NA	NA
TR35440|c2_g2_i1	14.8492	50.9117	1.77761	0.0528041	0.833903	No	ribosomal protein L16 (plastid)	Veronica americana	NA	translation[GO:0006412]	structural constituent of ribosome[GO:0003735] ; rRNA binding[GO:0019843]	ribosome[GO:0005840] ; plastid[GO:0009536]	NA
[truncated: 39,128 more rows]
