# Supplementary material for: Altered Developmental and Metabolic Gene Expression in Basil Interspecific Hybrids
Source: Plants (Basel). 2022 Jul 18;11(14):1873. doi: 10.3390/plants11141873 (PMC9321874; doi:10.3390/plants11141873)
Supplement: Supplementary file 1 [file plants-11-01873-s001.zip › Table S9_DGE_OBP1_vs_F1. XLSX.xlsx]

## Sheet: F1 specific
TrID	F1 Readcount
TR10024|c0_g1_i1	232
TR10025|c1_g1_i2	42
TR1003|c0_g1_i1	134
TR10043|c0_g2_i1	48
TR10069|c0_g2_i1	44
TR10174|c0_g1_i1	34
TR10182|c0_g1_i2	36
TR10213|c0_g2_i1	34
TR10214|c0_g1_i1	26
TR10358|c0_g1_i1	30
TR10397|c0_g1_i2	22
TR10750|c0_g2_i1	20
TR10783|c0_g1_i1	142
TR10783|c0_g1_i3	128
TR10783|c0_g1_i5	226
TR1094|c0_g1_i2	22
TR11026|c0_g1_i1	26
TR1109|c0_g1_i1	32
TR11239|c0_g1_i1	26
TR11249|c0_g1_i1	12
TR1130|c0_g1_i1	20
TR11338|c0_g1_i2	22
TR11353|c0_g1_i1	28
TR11379|c0_g1_i1	22
TR11407|c0_g1_i1	26
TR11415|c0_g1_i1	80
TR11554|c0_g1_i1	46
TR11563|c0_g1_i1	26
TR11646|c0_g1_i1	66
TR11672|c0_g1_i1	18
TR11714|c0_g1_i1	20
TR11752|c0_g1_i1	28
TR1181|c0_g2_i1	52
TR11815|c0_g1_i1	32
TR11832|c0_g1_i1	56
TR11959|c0_g2_i1	26
TR11981|c0_g3_i1	22
TR12021|c0_g1_i1	120
TR12046|c0_g1_i2	26
TR12101|c0_g1_i1	56
TR12107|c0_g1_i1	102
TR12107|c0_g1_i2	90
TR12109|c0_g1_i1	124
TR1220|c0_g1_i1	14
TR12273|c0_g2_i1	58
TR12324|c0_g1_i1	94
TR12358|c0_g1_i1	32
TR12412|c0_g1_i1	412
TR1242|c0_g1_i1	46
TR12421|c0_g1_i1	26
TR12460|c0_g1_i1	326
TR1256|c0_g1_i1	82
TR12645|c0_g2_i1	112
TR12691|c0_g1_i1	30
TR12726|c0_g1_i1	234
TR12744|c0_g1_i1	30
TR12808|c0_g1_i1	14
TR12855|c0_g1_i1	26
TR12890|c0_g1_i1	12
TR13029|c0_g1_i1	20
TR13050|c0_g1_i1	24
TR13072|c0_g2_i1	22
TR13131|c0_g1_i1	32
TR13208|c0_g1_i1	30
TR13287|c0_g1_i1	40
TR13288|c0_g1_i1	22
TR13343|c0_g1_i1	22
TR13501|c0_g1_i1	16
TR13567|c0_g1_i1	12
TR13595|c0_g1_i1	32
TR13762|c0_g1_i1	24
TR13764|c0_g1_i1	20
TR13772|c0_g1_i1	30
TR13829|c0_g1_i1	12
TR13948|c0_g2_i1	28
TR13966|c0_g1_i1	20
TR13987|c0_g1_i2	52
TR13994|c0_g1_i1	12
TR14086|c0_g1_i1	46
TR14086|c0_g2_i1	38
TR14086|c0_g4_i1	42
TR14123|c0_g1_i1	16
TR14143|c0_g1_i1	22
TR14171|c0_g2_i1	34
TR14201|c0_g2_i1	34
TR1428|c0_g1_i1	22
TR14300|c0_g1_i1	12
TR14312|c0_g1_i1	28
TR14323|c0_g1_i2	44
TR14369|c0_g1_i1	106
TR14390|c0_g1_i1	16
TR14392|c0_g1_i1	34
TR1447|c0_g1_i1	64
TR1448|c0_g1_i1	14
TR14485|c0_g1_i1	76
TR14501|c0_g1_i1	40
TR14602|c0_g1_i1	884
TR14639|c0_g1_i1	62
TR14642|c0_g1_i1	18
TR1465|c0_g1_i2	24
TR1466|c0_g2_i1	26
TR14670|c0_g1_i1	16
TR14684|c0_g1_i1	20
TR14720|c0_g1_i1	54
TR14733|c0_g1_i1	12
TR1479|c0_g2_i1	72
TR148|c0_g1_i1	38
TR14887|c0_g1_i1	54
TR14907|c0_g1_i1	16
TR14914|c0_g1_i1	20
TR15085|c0_g1_i1	22
TR15129|c0_g1_i1	26
TR15134|c0_g1_i1	12
TR15166|c0_g1_i1	14
TR1522|c0_g1_i1	32
TR1522|c1_g1_i1	22
TR1531|c0_g1_i1	28
TR15340|c0_g1_i1	50
TR15444|c0_g1_i1	52
TR15468|c0_g1_i1	34
TR15501|c0_g1_i1	22
TR15506|c0_g1_i1	24
TR15665|c0_g1_i1	16
TR15706|c0_g1_i1	12
TR15725|c0_g1_i2	18
TR1580|c0_g1_i1	90
TR16000|c0_g1_i1	12
TR16037|c0_g1_i1	34
TR16047|c0_g1_i1	32
TR16141|c0_g2_i1	50
TR1615|c0_g2_i1	52
TR16225|c0_g1_i1	42
TR16237|c0_g2_i2	772
TR16308|c0_g1_i1	26
TR16325|c0_g2_i2	20
TR16495|c0_g1_i1	38
TR16500|c0_g1_i1	24
TR16509|c1_g1_i1	4068
TR1656|c0_g1_i1	18
TR16571|c0_g2_i1	16
TR16582|c0_g1_i1	24
TR16609|c0_g1_i1	18
TR16614|c0_g1_i1	84
TR1667|c0_g1_i3	220
TR16684|c0_g1_i1	28
TR1673|c0_g1_i1	36
TR16961|c0_g1_i1	54
TR17021|c0_g1_i2	62
TR17081|c0_g1_i1	24
TR17091|c0_g1_i1	56
TR17142|c0_g1_i1	12
TR17163|c0_g1_i2	18
TR17166|c0_g1_i1	88
TR17166|c0_g3_i1	88
TR17240|c0_g1_i1	18
TR17245|c0_g1_i1	14
TR17265|c0_g1_i1	36
TR17305|c0_g1_i1	18
TR1731|c0_g2_i1	34
TR17311|c0_g1_i2	72
TR17329|c0_g1_i1	50
TR17330|c0_g1_i3	60
TR17361|c0_g1_i1	110
TR17385|c0_g1_i1	14
TR1739|c0_g1_i1	60
TR17404|c0_g1_i1	14
TR17408|c0_g1_i1	16
TR17459|c0_g1_i1	28
TR17490|c0_g1_i1	20
TR17551|c0_g1_i1	18
TR17604|c0_g1_i1	16
TR17657|c0_g1_i1	20
TR17675|c0_g1_i1	18
TR17678|c0_g1_i1	12
TR17754|c0_g1_i1	18
TR17761|c0_g1_i1	32
TR17780|c0_g1_i1	18
TR17799|c0_g1_i1	18
TR17805|c0_g2_i1	10
TR17806|c0_g1_i1	28
TR17807|c1_g1_i1	16
TR17841|c0_g1_i2	58
TR17851|c0_g1_i1	22
TR17852|c0_g1_i1	18
TR17880|c0_g1_i1	28
TR17903|c0_g1_i1	18
TR17944|c0_g2_i1	16
TR17945|c0_g3_i1	90
TR17945|c0_g4_i1	56
TR17966|c0_g1_i2	182
TR17995|c0_g1_i1	26
TR17996|c0_g1_i1	24
TR17996|c0_g1_i2	48
TR18017|c0_g1_i1	58
TR18047|c0_g1_i1	18
TR18100|c0_g1_i1	90
TR18100|c0_g2_i1	70
TR18109|c0_g3_i2	18
TR18144|c1_g1_i1	188
TR18157|c0_g1_i1	32
TR18159|c0_g2_i1	16
TR18205|c0_g1_i1	20
TR18261|c0_g2_i1	16
TR18263|c0_g1_i1	40
TR18273|c0_g2_i1	34
TR18281|c0_g1_i1	32
TR18288|c0_g2_i1	34
TR1829|c0_g1_i1	18
TR18322|c0_g1_i1	30
TR18329|c0_g1_i1	28
TR18366|c0_g1_i2	42
TR18395|c0_g1_i4	46
TR18395|c0_g1_i5	10
TR18419|c0_g1_i1	74
TR18453|c0_g1_i1	162
TR18453|c0_g1_i2	84
TR18478|c1_g1_i1	52
TR18478|c1_g1_i2	46
TR18506|c0_g1_i1	18
TR18548|c0_g1_i1	46
TR18584|c0_g1_i1	58
TR18634|c0_g1_i1	26
TR18636|c0_g2_i1	14
TR18650|c0_g2_i1	42
TR18650|c0_g4_i1	14
TR1867|c0_g1_i1	26
TR18697|c0_g1_i1	20
TR18720|c0_g1_i1	58
TR18731|c0_g1_i1	50
TR18736|c0_g1_i1	24
TR18745|c0_g1_i1	38
TR18755|c0_g1_i2	18
TR18788|c0_g1_i1	36
TR18798|c0_g2_i1	824
TR18849|c0_g2_i1	58
TR18865|c0_g1_i1	14
TR18865|c0_g1_i2	26
TR18867|c0_g1_i1	70
TR18883|c1_g1_i1	12
TR18899|c0_g1_i2	52
TR18905|c0_g3_i1	40
TR1891|c0_g2_i1	22
TR1893|c0_g1_i1	78
TR18957|c0_g1_i1	16
TR19025|c0_g1_i1	58
TR19050|c0_g1_i1	16
TR19058|c0_g1_i1	28
TR19077|c0_g1_i1	62
TR19099|c0_g1_i1	12
TR19108|c0_g2_i1	26
TR1911|c0_g1_i1	28
TR1911|c0_g2_i1	24
TR19116|c0_g1_i1	32
TR19125|c0_g1_i2	24
TR19137|c0_g1_i3	234
TR1917|c0_g2_i1	60
TR19205|c0_g1_i1	20
TR19231|c0_g1_i1	366
TR1926|c0_g1_i2	12
TR19264|c0_g1_i1	10
TR19318|c1_g1_i2	26
TR19328|c0_g1_i1	32
TR19328|c0_g2_i1	36
TR19335|c0_g1_i2	48
TR19335|c0_g1_i3	30
TR19356|c0_g1_i1	48
TR19356|c0_g2_i1	20
TR19375|c0_g1_i1	12
TR19383|c0_g1_i1	20
TR19399|c0_g1_i1	78
TR19399|c0_g2_i1	114
TR19414|c0_g1_i1	20
TR19425|c0_g3_i1	26
TR19450|c0_g2_i1	70
TR19450|c0_g2_i2	92
TR19472|c0_g1_i1	40
TR19486|c0_g1_i2	106
TR19523|c0_g1_i2	140
TR19535|c0_g1_i1	14
TR19536|c0_g1_i1	450
TR19540|c0_g1_i1	86
TR19543|c0_g1_i1	126
TR19547|c0_g1_i1	180
TR19547|c2_g1_i2	62
TR19547|c2_g1_i3	376
TR19603|c0_g1_i1	46
TR19611|c0_g3_i1	32
TR19612|c0_g1_i1	28
TR1962|c0_g1_i1	80
TR19626|c0_g1_i1	34
TR19626|c0_g1_i2	20
TR19639|c0_g1_i1	72
TR19698|c0_g1_i1	16
TR19728|c0_g1_i1	14
TR19728|c0_g2_i1	48
TR19741|c1_g1_i1	38
TR19744|c0_g1_i2	56
TR19744|c0_g1_i3	110
TR19797|c0_g1_i1	30
TR19860|c0_g1_i1	20
TR19895|c1_g3_i1	42
TR19910|c0_g1_i1	36
TR19920|c0_g1_i1	12
TR19928|c0_g1_i1	14
TR19971|c0_g1_i1	18
TR19983|c0_g1_i1	22
TR19997|c0_g1_i1	18
TR20003|c0_g1_i1	14
TR20008|c0_g1_i1	48
TR20068|c0_g2_i1	78
TR20070|c0_g1_i2	176
TR20081|c0_g1_i1	156
TR20082|c0_g1_i1	22
TR20119|c0_g1_i2	48
TR20119|c0_g1_i4	26
TR20124|c1_g1_i2	26
TR20151|c0_g1_i2	26
TR20189|c0_g1_i1	28
TR20199|c0_g1_i1	40
TR20249|c0_g1_i1	28
TR2026|c0_g2_i1	32
TR20263|c0_g1_i1	16
TR20307|c0_g1_i2	34
TR20308|c0_g1_i2	20
TR20350|c0_g1_i1	76
TR20372|c0_g1_i1	14
TR20378|c0_g1_i3	16
TR20393|c0_g2_i1	116
TR20432|c0_g1_i2	52
TR20438|c0_g1_i1	18
TR20451|c0_g1_i1	20
TR20459|c0_g1_i1	24
TR20554|c0_g1_i3	36
TR20581|c0_g1_i1	18
TR20586|c0_g1_i1	82
TR20605|c0_g1_i1	128
TR20606|c1_g1_i1	52
TR20665|c0_g1_i1	622
TR2067|c0_g1_i1	48
TR20704|c0_g1_i3	264
TR20704|c0_g2_i1	314
TR20714|c0_g1_i1	30
TR20714|c0_g1_i3	42
TR20714|c0_g1_i5	38
TR20720|c0_g1_i1	18
TR20745|c0_g1_i2	28
TR20767|c1_g1_i1	18
TR20786|c0_g1_i1	18
TR20798|c0_g1_i1	20
TR20812|c0_g1_i1	192
TR20833|c0_g1_i3	70
TR20845|c0_g2_i1	14
TR20850|c0_g1_i2	12
TR20855|c0_g2_i2	46
TR20877|c0_g1_i1	116
TR20903|c0_g1_i4	28
TR20919|c0_g1_i2	94
TR2092|c0_g1_i1	360
TR20923|c0_g1_i1	26
TR20924|c0_g1_i3	16
TR20932|c0_g1_i2	118
TR20937|c0_g2_i1	16
TR2094|c0_g2_i1	212
TR20948|c0_g1_i1	14
TR20987|c0_g1_i3	46
TR21001|c0_g1_i1	36
TR21001|c0_g1_i4	262
TR21037|c0_g2_i1	18
TR21042|c0_g1_i2	50
TR21053|c1_g1_i7	20
TR21101|c0_g1_i2	28
TR21127|c0_g1_i1	14
TR21154|c0_g1_i1	30
TR21154|c1_g2_i1	40
TR21154|c1_g3_i1	28
TR21186|c0_g1_i1	254
TR21189|c0_g1_i1	24
TR212|c0_g1_i1	36
TR21201|c0_g1_i1	58
TR21220|c0_g1_i2	16
TR21224|c0_g1_i1	24
TR21231|c0_g1_i1	38
TR21246|c0_g2_i2	24
TR21256|c0_g1_i2	26
TR21263|c0_g3_i1	28
TR21276|c0_g1_i2	56
TR21286|c0_g1_i1	26
TR21300|c0_g1_i2	54
TR21319|c0_g1_i1	114
TR21358|c2_g1_i1	14
TR21365|c0_g1_i2	58
TR21377|c0_g1_i1	80
TR21385|c0_g2_i1	192
TR21386|c0_g4_i1	38
TR21389|c0_g1_i3	26
TR21397|c0_g1_i3	50
TR21400|c0_g1_i6	26
TR21473|c0_g1_i1	1570
TR21617|c0_g1_i1	30
TR2162|c0_g1_i1	60
TR2162|c0_g1_i4	84
TR2162|c0_g1_i5	60
TR21624|c0_g1_i1	86
TR21624|c0_g1_i4	78
TR21637|c0_g1_i4	34
TR21642|c0_g1_i1	16
TR21667|c0_g1_i1	12
TR21672|c1_g2_i1	16
TR21683|c2_g1_i1	396
TR2170|c1_g2_i1	28
TR2170|c1_g4_i1	244
TR21700|c0_g1_i1	32
TR21701|c0_g3_i1	26
TR21711|c0_g1_i1	26
TR2172|c0_g2_i3	46
TR2172|c0_g2_i6	28
TR2172|c0_g3_i1	18
TR21741|c0_g1_i1	84
TR21747|c0_g1_i1	50
TR21755|c0_g1_i1	42
TR2178|c6_g2_i1	26
TR2178|c6_g3_i1	26
TR2179|c0_g1_i2	166
TR21792|c2_g1_i1	30
TR21805|c0_g1_i1	38
TR2182|c0_g1_i5	34
TR21821|c0_g1_i1	138
TR21825|c0_g1_i1	26
TR21829|c0_g1_i1	62
TR2183|c0_g1_i2	80
TR2184|c0_g1_i1	74
TR21848|c0_g1_i3	48
TR21856|c0_g3_i1	32
TR21863|c0_g1_i1	28
TR2187|c0_g1_i11	78
TR2187|c0_g1_i4	66
TR21880|c0_g1_i1	36
TR21881|c0_g1_i1	146
TR21881|c0_g4_i1	114
TR21882|c0_g1_i3	136
TR21882|c0_g1_i5	48
TR2190|c0_g1_i1	396
TR21904|c0_g1_i2	38
TR21912|c0_g1_i2	20
TR2192|c0_g2_i2	170
TR21928|c0_g1_i3	42
TR21931|c0_g1_i1	16
TR21958|c0_g2_i3	20
TR2196|c0_g2_i1	54
TR21975|c0_g2_i1	20
TR21979|c0_g1_i3	34
TR21991|c0_g2_i2	32
TR2203|c1_g1_i1	76
TR22036|c0_g1_i1	38
TR22037|c0_g1_i1	290
TR22037|c0_g1_i2	56
TR2204|c0_g1_i5	30
TR22043|c0_g1_i1	98
TR2205|c0_g1_i1	844
TR22051|c0_g1_i2	92
TR2207|c0_g1_i6	50
TR22076|c0_g3_i2	38
TR22076|c0_g3_i3	14
TR22105|c0_g1_i2	176
TR22110|c0_g2_i1	16
TR2212|c1_g1_i3	42
TR2213|c0_g2_i1	12
TR22133|c0_g1_i3	26
TR22142|c0_g1_i1	30
TR22153|c0_g1_i2	42
TR2216|c1_g4_i5	96
TR2216|c1_g4_i7	162
TR22164|c0_g1_i1	28
TR2217|c0_g1_i4	100
TR2217|c1_g1_i3	160
TR22173|c0_g1_i1	34
TR2218|c1_g4_i13	56
TR2218|c1_g4_i5	38
TR22186|c1_g1_i1	24
TR22210|c0_g1_i1	364
TR2223|c0_g1_i4	34
TR2225|c1_g11_i9	288
TR2225|c1_g5_i1	32
TR22255|c0_g1_i2	104
TR22255|c0_g1_i3	98
TR22257|c0_g1_i5	36
TR22263|c0_g1_i1	50
TR2227|c2_g1_i3	54
TR2228|c0_g1_i2	90
TR2228|c0_g1_i4	240
TR22303|c0_g2_i1	68
TR2233|c3_g3_i3	36
TR22339|c0_g2_i2	16
TR22342|c0_g1_i1	20
TR22350|c0_g1_i1	28
TR22351|c0_g1_i1	24
TR2237|c0_g2_i2	52
TR2237|c0_g3_i1	48
TR2239|c0_g3_i7	268
TR22398|c0_g1_i2	32
TR2240|c0_g1_i1	18
TR2240|c0_g1_i3	100
TR2240|c0_g1_i4	22
TR22409|c0_g1_i1	24
TR22414|c0_g2_i1	330
TR22414|c0_g3_i1	58
TR2244|c1_g1_i1	566
TR2248|c0_g1_i1	88
TR2248|c1_g1_i2	194
TR2248|c1_g6_i2	118
TR22495|c0_g1_i1	66
TR2250|c2_g2_i1	66
TR22523|c0_g1_i1	34
TR2254|c0_g1_i7	470
TR2254|c0_g1_i9	158
TR2255|c10_g2_i1	42
TR2255|c10_g3_i2	1474
TR2256|c3_g1_i7	126
TR2256|c3_g1_i8	318
TR22565|c1_g1_i1	146
TR22565|c1_g1_i2	114
TR2257|c0_g1_i3	30
TR22581|c0_g1_i3	18
TR22597|c0_g1_i1	24
TR22608|c1_g1_i1	34
TR2262|c0_g6_i1	20
TR2262|c0_g8_i1	14
TR2263|c1_g1_i10	40
TR2263|c1_g1_i6	20
TR2263|c1_g3_i1	32
TR2264|c0_g1_i1	44
TR22646|c0_g1_i1	42
TR22646|c0_g2_i2	46
TR22662|c0_g1_i1	24
TR22662|c0_g2_i1	22
TR22662|c1_g2_i1	20
TR22662|c1_g3_i1	76
TR22674|c0_g2_i1	80
TR2268|c0_g1_i3	38
TR2269|c0_g1_i2	68
TR22715|c0_g1_i1	58
TR22715|c0_g2_i1	56
TR2272|c0_g2_i3	28
TR22729|c0_g1_i2	20
TR22730|c0_g5_i1	32
TR2274|c0_g1_i6	130
TR22742|c0_g1_i1	90
TR22742|c0_g1_i2	92
TR22755|c0_g2_i1	80
TR22762|c0_g1_i1	102
TR22766|c0_g1_i1	124
TR22776|c0_g2_i2	44
TR22786|c0_g1_i1	18
TR22801|c0_g1_i1	12
TR2282|c0_g3_i2	20
TR2283|c0_g2_i3	44
TR2283|c0_g3_i2	44
TR22836|c0_g1_i1	32
TR2286|c0_g1_i1	22
TR22892|c0_g2_i2	30
TR2290|c0_g2_i1	102
TR2290|c0_g2_i3	92
TR22903|c0_g1_i1	40
TR22905|c0_g1_i1	20
TR22925|c0_g2_i1	82
TR22925|c0_g2_i2	358
TR2293|c0_g1_i4	92
TR2294|c0_g7_i1	36
TR22944|c0_g1_i3	16
TR22947|c0_g1_i2	34
TR22951|c0_g1_i1	30
TR22952|c0_g3_i1	30
TR2296|c0_g4_i2	36
TR22964|c0_g1_i1	400
TR2297|c0_g2_i1	126
TR22973|c0_g1_i1	20
TR23001|c0_g1_i2	114
TR23014|c0_g1_i2	46
TR23015|c0_g1_i2	90
TR2302|c0_g1_i1	130
TR23025|c0_g1_i1	28
TR23029|c0_g1_i1	80
TR2303|c0_g2_i1	50
TR2303|c1_g1_i1	114
TR23036|c0_g1_i1	16
TR23040|c1_g1_i1	50
TR23049|c0_g1_i1	38
TR2305|c0_g1_i1	30
TR2305|c0_g1_i2	14
TR2305|c0_g1_i4	42
TR2307|c0_g1_i2	482
TR2308|c3_g1_i2	74
TR2308|c3_g1_i3	54
TR23086|c0_g2_i2	56
TR23088|c0_g1_i1	1224
TR2309|c0_g1_i1	56
TR23119|c0_g2_i1	102
TR2312|c0_g3_i1	66
TR2312|c0_g4_i7	40
TR2312|c0_g4_i9	46
TR23125|c0_g1_i2	32
TR23126|c0_g1_i4	152
TR23126|c0_g2_i1	16
TR23129|c0_g1_i1	80
TR23129|c0_g1_i2	132
TR23129|c0_g1_i3	146
TR23129|c0_g1_i4	38
TR23129|c0_g2_i1	16
TR23129|c0_g3_i2	26
TR2313|c0_g2_i2	90
TR2313|c0_g2_i3	114
TR2313|c0_g2_i5	78
TR23150|c1_g1_i1	32
TR23161|c0_g1_i1	14
TR23167|c0_g1_i2	42
TR23167|c0_g1_i3	22
TR23168|c1_g1_i1	14
TR23168|c1_g2_i1	18
TR2317|c1_g1_i2	534
TR23170|c0_g1_i3	18
TR23173|c0_g1_i1	20
TR23179|c0_g1_i1	28
TR23179|c0_g1_i2	26
TR23182|c0_g1_i1	124
TR23200|c1_g1_i1	136
TR23205|c0_g2_i1	84
TR23208|c0_g1_i2	46
TR23208|c0_g1_i3	24
TR23208|c0_g1_i4	76
TR23214|c0_g2_i3	22
TR2322|c0_g1_i3	54
TR2323|c0_g1_i3	158
TR23233|c0_g1_i2	382
TR23240|c0_g2_i1	22
TR23240|c0_g2_i2	24
TR23249|c0_g1_i1	20
TR23257|c0_g1_i4	76
TR2327|c0_g1_i2	16
TR23278|c0_g1_i3	38
TR2329|c0_g3_i1	634
TR2330|c0_g1_i5	54
TR23317|c0_g4_i1	52
TR23339|c0_g1_i1	86
TR2334|c0_g1_i2	56
TR23358|c0_g1_i1	42
TR2337|c0_g1_i6	62
TR23380|c0_g2_i1	14
TR2339|c0_g1_i1	104
TR2339|c0_g1_i2	100
TR2339|c0_g1_i5	100
TR2340|c0_g1_i10	14
TR2340|c0_g1_i6	68
TR2340|c0_g1_i7	566
TR23405|c0_g1_i1	34
TR2343|c0_g1_i1	20
TR23454|c0_g1_i1	24
TR23478|c0_g2_i1	40
TR2348|c0_g1_i3	858
TR23492|c0_g1_i1	40
TR2350|c0_g1_i2	198
TR2350|c0_g2_i3	82
TR2351|c1_g1_i3	62
TR2351|c1_g3_i1	22
TR23518|c0_g1_i1	48
TR23534|c0_g4_i2	38
TR23534|c0_g5_i2	42
TR23540|c0_g1_i2	76
TR23548|c0_g2_i1	12
TR23561|c0_g6_i1	24
TR2358|c0_g1_i2	62
TR2358|c0_g1_i3	122
TR23580|c0_g1_i1	42
TR2360|c0_g1_i2	42
TR2360|c0_g1_i4	144
TR2360|c0_g1_i5	34
TR2360|c0_g1_i9	124
TR23601|c0_g2_i2	22
TR23615|c0_g2_i1	22
TR23623|c0_g1_i1	114
TR23623|c0_g2_i1	74
TR23632|c0_g1_i1	32
TR2364|c0_g1_i2	56
TR23658|c0_g1_i1	86
TR23659|c0_g1_i3	36
TR23668|c0_g1_i1	44
TR2367|c0_g1_i2	44
TR2369|c0_g1_i5	32
TR2369|c0_g4_i2	34
TR23691|c1_g1_i2	84
TR23692|c0_g1_i1	30
TR23696|c0_g1_i3	48
TR23697|c0_g1_i1	40
TR2370|c0_g1_i1	14
TR2370|c0_g3_i1	28
TR23712|c0_g2_i1	28
TR23719|c0_g2_i1	44
TR23731|c0_g2_i1	46
TR23731|c0_g2_i3	32
TR23747|c0_g1_i2	124
TR23767|c0_g1_i1	34
TR23775|c0_g1_i1	96
TR23775|c0_g1_i3	116
TR23777|c0_g1_i2	38
TR23777|c0_g1_i3	22
TR2379|c1_g1_i1	90
TR23809|c0_g1_i2	76
TR2381|c0_g1_i4	28
TR23823|c0_g1_i2	23354
TR2384|c0_g3_i1	24
TR23850|c0_g2_i3	230
TR23850|c0_g2_i4	230
TR23859|c0_g1_i1	10
TR23866|c0_g2_i2	28
TR23876|c0_g1_i1	56
TR23882|c0_g1_i4	34
TR2389|c0_g2_i5	22
TR2389|c0_g3_i1	14
TR23898|c0_g1_i10	40
TR23898|c0_g1_i7	54
TR23898|c0_g1_i9	244
TR23914|c0_g1_i1	32
TR2392|c0_g2_i3	90
TR2392|c0_g2_i4	30
TR23920|c0_g1_i1	306
TR23926|c0_g1_i1	140
TR23936|c0_g2_i1	114
TR23936|c0_g2_i2	430
TR23939|c3_g1_i2	36
TR23939|c3_g4_i1	24
TR23939|c3_g5_i2	22
TR2395|c0_g1_i1	30
TR23961|c0_g2_i1	12
TR2397|c0_g1_i1	98
TR23991|c0_g3_i5	98
TR23992|c0_g1_i2	146
TR23996|c0_g2_i2	36
TR23999|c0_g1_i1	58
TR24007|c0_g5_i1	24
TR24010|c0_g1_i1	14
TR24012|c0_g1_i3	34
TR24040|c0_g1_i1	22
TR24041|c0_g1_i2	82
TR24048|c0_g1_i2	610
TR24050|c0_g1_i1	66
TR24060|c1_g2_i2	32
TR24063|c0_g2_i1	28
TR2407|c0_g1_i3	92
TR24072|c0_g1_i1	176
TR24078|c0_g1_i3	28
TR24078|c0_g1_i4	30
TR2409|c0_g4_i1	54
TR24090|c0_g2_i5	48
TR2410|c0_g2_i1	18
TR24102|c0_g1_i1	42
TR2411|c0_g1_i1	34
TR2411|c0_g1_i4	38
TR24117|c0_g2_i1	44
TR2412|c0_g1_i3	112
TR2413|c0_g4_i1	24
TR2415|c1_g1_i1	38
TR2415|c2_g1_i1	26
TR2415|c2_g1_i2	36
TR24166|c0_g1_i1	266
TR24170|c0_g1_i2	84
TR24177|c0_g1_i1	14
TR24177|c4_g1_i1	130
TR24177|c4_g1_i3	86
TR24177|c4_g2_i1	48
TR24177|c4_g2_i3	168
TR24177|c4_g2_i4	66
TR2419|c0_g1_i3	56
TR24198|c0_g1_i1	152
TR2420|c3_g3_i2	56
TR24201|c0_g1_i1	26
TR24217|c0_g2_i2	44
TR24221|c0_g1_i1	32
TR24222|c0_g1_i1	22
TR24232|c0_g1_i5	32
TR24241|c0_g1_i1	34
TR24244|c0_g4_i1	28
TR24246|c0_g1_i2	34
TR24247|c0_g1_i1	46
TR2425|c0_g2_i5	68
TR2425|c0_g2_i6	1202
TR2425|c0_g3_i1	472
TR2427|c0_g1_i2	50
TR2429|c0_g1_i1	230
TR2429|c0_g2_i4	1420
TR24290|c0_g1_i1	14
TR24324|c0_g1_i2	18
TR2435|c0_g4_i1	708
TR2435|c0_g6_i1	4110
TR2435|c0_g6_i4	4682
TR24374|c0_g1_i1	50
TR24377|c0_g2_i1	452
TR24399|c0_g3_i1	82
TR24403|c1_g1_i1	20
TR24407|c0_g1_i1	30
TR2441|c0_g1_i2	118
TR24414|c0_g1_i1	130
TR24427|c0_g2_i1	112
TR2443|c1_g3_i11	304
TR24432|c0_g1_i1	66
TR24497|c0_g1_i1	200
TR24501|c0_g1_i1	36
TR24510|c0_g2_i1	148
TR24513|c0_g1_i1	44
TR24522|c0_g1_i2	38
TR24535|c0_g1_i1	12
TR24535|c0_g1_i4	260
TR24540|c0_g1_i1	14
TR24549|c0_g1_i4	76
TR2455|c0_g1_i2	44
TR24553|c0_g1_i3	52
TR24560|c0_g1_i3	54
TR24570|c1_g1_i4	72
TR24571|c0_g1_i4	68
TR24575|c0_g1_i5	80
TR24577|c0_g2_i1	18
TR24579|c0_g1_i1	56
TR24581|c0_g1_i2	18
TR2459|c0_g1_i4	72
TR24603|c0_g1_i2	32
TR24607|c0_g1_i1	30
TR2462|c0_g2_i1	20
TR24626|c0_g2_i1	122
TR24635|c0_g1_i2	18
TR2464|c0_g1_i2	316
TR24648|c0_g1_i2	116
TR24653|c0_g1_i1	462
TR24655|c0_g1_i2	18
TR24655|c0_g1_i3	24
TR24667|c1_g1_i2	336
TR24667|c1_g1_i3	228
TR24677|c0_g1_i1	28
TR24682|c0_g2_i1	40
TR24682|c0_g2_i11	32
TR2470|c1_g1_i1	56
TR2470|c1_g1_i10	28
TR2470|c1_g1_i11	22
TR2470|c1_g1_i2	64
TR2470|c1_g1_i9	166
TR2470|c1_g4_i1	14
TR24705|c1_g2_i1	222
TR24705|c1_g2_i3	202
TR2471|c0_g1_i3	418
TR24715|c0_g2_i1	31932
TR24727|c0_g2_i1	16
TR24742|c0_g1_i4	16
TR24744|c0_g1_i3	44
TR24749|c0_g1_i1	22
TR2475|c0_g3_i3	412
TR24755|c0_g1_i1	34
TR24760|c0_g2_i1	122
TR2477|c0_g1_i1	78
TR24776|c0_g1_i1	20
TR24776|c0_g2_i2	56
TR24782|c0_g1_i1	42
TR24798|c0_g1_i2	156
TR24798|c0_g2_i4	802
TR24813|c0_g2_i1	28
TR24814|c1_g1_i3	96
TR24816|c0_g1_i2	126
TR2483|c0_g2_i2	38
TR2483|c0_g2_i5	28
TR24833|c0_g1_i1	24
TR24853|c0_g2_i2	32
TR2486|c0_g2_i1	102
TR24869|c0_g1_i2	74
TR24879|c1_g2_i1	74
TR24879|c1_g2_i6	96
TR24879|c1_g2_i7	42
TR24879|c1_g2_i8	104
TR24879|c1_g2_i9	86
TR24883|c1_g1_i1	28
TR24894|c0_g2_i2	28
TR24897|c0_g1_i1	244
TR2490|c0_g1_i1	120
TR2491|c0_g1_i3	280
TR24928|c0_g3_i1	44
TR24934|c0_g1_i1	26
TR24934|c0_g1_i4	56
TR24942|c0_g1_i2	24
TR24943|c0_g2_i2	1170
TR24943|c0_g2_i3	1250
TR24948|c0_g1_i1	48
TR24949|c0_g1_i3	78
TR2495|c1_g1_i4	56
TR2496|c0_g1_i4	140
TR24961|c0_g1_i2	36
TR2497|c0_g1_i1	290
TR2497|c0_g3_i4	2730
TR24981|c0_g1_i1	136
TR24984|c0_g1_i1	56
TR24984|c0_g1_i2	30
TR2499|c0_g1_i1	46
TR24992|c0_g1_i1	36
TR2500|c0_g1_i3	38
TR25005|c0_g2_i1	38
TR25007|c0_g1_i2	20
TR2501|c1_g1_i3	174
TR2501|c1_g2_i1	26
TR25026|c0_g1_i1	18
TR25028|c0_g1_i2	78
TR25028|c0_g1_i4	92
TR25033|c0_g1_i4	18
TR25036|c0_g2_i1	28
TR2504|c0_g2_i2	150
TR2504|c0_g3_i1	10
TR2504|c0_g3_i5	36
TR25046|c0_g1_i2	22
TR25053|c1_g1_i1	28
TR25053|c1_g1_i2	32
TR25053|c1_g2_i1	10
TR2506|c0_g2_i2	58
TR2507|c0_g1_i1	46
TR25076|c3_g2_i1	1304
TR25078|c1_g1_i7	54
TR2508|c0_g1_i2	58
TR25099|c0_g1_i2	12
TR25109|c0_g5_i1	14
TR25111|c0_g2_i1	160
TR25111|c0_g2_i2	36
TR25116|c0_g1_i1	24
TR25119|c0_g1_i1	106
TR25131|c0_g1_i1	36
TR25135|c0_g3_i1	16
TR25137|c1_g1_i1	48
TR2514|c1_g10_i3	78
TR2517|c0_g1_i2	18
TR2517|c0_g1_i3	76
TR2519|c0_g1_i3	68
TR25193|c0_g1_i2	40
TR2521|c0_g1_i1	46
TR2522|c0_g1_i2	56
TR2522|c0_g1_i4	70
TR25222|c0_g2_i1	86
TR25227|c0_g1_i3	58
TR2524|c0_g1_i2	62
TR25258|c0_g1_i3	42
TR25258|c0_g1_i4	30
TR25261|c0_g1_i1	18
TR25267|c0_g2_i1	140
TR25267|c0_g2_i2	140
TR25267|c0_g2_i3	146
TR25272|c0_g4_i1	366
TR25274|c0_g1_i2	40
TR25277|c1_g1_i1	16
TR25277|c1_g2_i1	276
TR2528|c3_g1_i4	66
TR25286|c0_g1_i3	26
TR25292|c0_g1_i1	96
TR25301|c0_g2_i2	22
TR2532|c0_g4_i3	40
TR25332|c0_g1_i2	52
TR25343|c1_g1_i3	32
TR25345|c0_g1_i5	26
TR25345|c0_g1_i6	478
TR25355|c0_g1_i1	18
TR25355|c0_g1_i2	82
TR25356|c0_g2_i1	60
TR25364|c1_g1_i1	10
TR2538|c0_g1_i1	74
TR2538|c0_g1_i2	34
TR25383|c0_g2_i1	88
TR25384|c0_g1_i1	20
TR2541|c0_g2_i3	74
TR2543|c1_g1_i2	282
TR2543|c1_g1_i6	24
TR2543|c1_g1_i7	102
TR2544|c0_g1_i1	260
TR2544|c0_g4_i1	26
TR2544|c0_g4_i2	42
TR2545|c0_g3_i1	86
TR2546|c0_g1_i1	14
TR2547|c0_g2_i5	188
TR25490|c0_g1_i1	26
TR25495|c0_g1_i1	36
TR2550|c1_g1_i1	16
TR2550|c1_g4_i2	46
TR25524|c0_g2_i1	26
TR25525|c1_g2_i2	20
TR25530|c2_g2_i1	14
TR25544|c0_g1_i1	594
TR25558|c0_g1_i1	88
TR25569|c0_g1_i2	16
TR25570|c0_g1_i3	32
TR25576|c0_g1_i3	30
TR25578|c0_g1_i2	2154
TR25578|c0_g1_i3	2114
TR2558|c2_g3_i1	344
TR2558|c2_g3_i2	160
TR25581|c0_g1_i2	40
TR25586|c1_g4_i1	28
TR2559|c2_g5_i1	146
TR25599|c0_g1_i3	38
TR25600|c0_g1_i2	304
TR25600|c0_g1_i3	264
TR25607|c0_g1_i4	32
TR25613|c0_g1_i3	28
TR25614|c0_g1_i2	20
TR25619|c0_g1_i1	30
TR2562|c0_g8_i2	26
TR2562|c0_g8_i4	34
TR25630|c0_g1_i1	38
TR25636|c0_g1_i2	36
TR2564|c0_g1_i6	68
TR25646|c0_g1_i1	46
TR25648|c0_g1_i3	56
TR25664|c0_g2_i1	36
TR25668|c1_g1_i1	38
TR25675|c0_g1_i1	22
TR25677|c0_g1_i1	130
TR25685|c0_g1_i1	24
TR2569|c0_g1_i10	62
TR2569|c0_g1_i2	92
TR2570|c0_g1_i12	34
TR2570|c0_g1_i9	100
TR25701|c4_g1_i1	38
TR25701|c4_g4_i2	28
TR25701|c4_g4_i4	24
TR25701|c4_g7_i1	14
TR2571|c0_g1_i4	216
TR2571|c1_g3_i2	48
TR2571|c1_g3_i5	26
TR25717|c0_g1_i1	64
TR25718|c0_g1_i2	894
TR25718|c0_g1_i3	238
TR2572|c0_g2_i4	36
TR2572|c1_g2_i3	20
TR25722|c1_g1_i2	60
TR25733|c0_g1_i1	18
TR2575|c0_g2_i1	14
TR25751|c1_g1_i1	612
TR25751|c1_g1_i3	166
TR25751|c2_g1_i1	126
TR25756|c0_g2_i2	40
TR2576|c0_g2_i3	144
TR25764|c0_g1_i1	92
TR2577|c0_g1_i2	32
TR2577|c0_g2_i2	298
TR25770|c0_g1_i1	618
TR2578|c1_g1_i2	188
TR25782|c0_g1_i4	24
TR25783|c0_g1_i1	82
TR25795|c0_g1_i1	30
TR25796|c0_g1_i2	308
TR2580|c0_g1_i6	18
TR2580|c0_g1_i8	130
TR2580|c0_g2_i1	42
TR2580|c0_g3_i3	28
TR2581|c0_g1_i3	188
TR2581|c0_g1_i4	170
TR25814|c1_g1_i3	36
TR25814|c1_g1_i4	18
TR25814|c1_g2_i1	18
TR25814|c1_g2_i3	18
TR25815|c0_g3_i1	506
TR25828|c0_g2_i1	18
TR25835|c0_g3_i1	14
TR25852|c0_g3_i1	116
TR25860|c0_g1_i1	24
TR2589|c0_g1_i1	96
TR2589|c0_g10_i3	150
TR2589|c0_g2_i1	36
TR2589|c0_g5_i1	20
TR25899|c0_g4_i2	210
TR2590|c0_g1_i1	88
TR2590|c0_g1_i6	26
TR25906|c0_g1_i3	54
TR25911|c0_g1_i4	22
TR25915|c0_g1_i2	64
TR25915|c0_g1_i3	44
TR25917|c0_g1_i2	184
TR25917|c0_g1_i5	76
TR25917|c0_g1_i6	72
TR25922|c0_g2_i2	56
TR25938|c0_g1_i3	24
TR25950|c0_g1_i4	24
TR25955|c0_g2_i1	30
TR25956|c0_g4_i1	96
TR2597|c0_g5_i1	20
TR25981|c0_g1_i1	36
TR25989|c0_g1_i2	104
TR2599|c1_g1_i1	66
TR2599|c2_g6_i4	40
TR25995|c1_g1_i1	36
TR25995|c1_g1_i2	36
TR25995|c1_g1_i4	42
TR2600|c0_g1_i1	116
TR2600|c0_g1_i8	122
TR26005|c0_g1_i3	64
TR26009|c0_g1_i1	22
TR26009|c0_g2_i1	36
TR26025|c0_g1_i1	52
TR26028|c0_g1_i3	68
TR26028|c0_g1_i4	42
TR2605|c0_g2_i2	16
TR2605|c0_g3_i1	52
TR26061|c0_g1_i3	26
TR26069|c0_g1_i9	38
TR2607|c2_g2_i1	12
TR26070|c0_g1_i5	46
TR26075|c0_g1_i1	208
TR26075|c0_g1_i3	106
TR26079|c0_g1_i1	22
TR26084|c0_g1_i1	62
TR26090|c0_g2_i1	76
TR26098|c0_g1_i1	36
TR26099|c0_g1_i2	32
TR26100|c0_g2_i1	638
TR26108|c0_g1_i5	46
TR2611|c1_g1_i1	146
TR2611|c1_g1_i7	24
TR26111|c0_g1_i3	54
TR26113|c0_g1_i2	26
TR26115|c0_g2_i1	20
TR26120|c0_g1_i1	14
TR26120|c0_g2_i1	42
TR26121|c0_g1_i1	28
TR26127|c0_g1_i2	98
TR26147|c0_g1_i1	640
TR26148|c0_g1_i2	82
TR2615|c1_g1_i4	60
TR26150|c0_g3_i2	30
TR26151|c0_g1_i4	28
TR26152|c0_g1_i2	30
TR26155|c0_g1_i1	18
TR26158|c0_g3_i1	28
TR26166|c0_g1_i2	154
TR26175|c0_g1_i1	28
TR26177|c0_g1_i1	28
TR2618|c0_g1_i2	28
TR26188|c3_g1_i1	28
TR26193|c0_g1_i4	28
TR26197|c1_g3_i1	24
TR2620|c1_g1_i1	94
TR2620|c3_g1_i1	60
TR26202|c1_g1_i2	34
TR26206|c0_g1_i1	18
TR26209|c0_g1_i2	24
TR26210|c0_g1_i1	16
TR26212|c0_g1_i2	88
TR26213|c0_g1_i4	32
TR26214|c0_g1_i2	30
TR26229|c0_g1_i1	52
TR26229|c0_g1_i3	46
TR26238|c0_g2_i2	22
TR26244|c0_g2_i2	220
TR26249|c0_g1_i1	20
TR26253|c0_g1_i1	30
TR26262|c0_g1_i1	94
TR26272|c0_g1_i1	40
TR26273|c0_g1_i1	18
TR26275|c1_g1_i5	34
TR26275|c1_g1_i7	116
TR26286|c0_g2_i6	170
TR26287|c1_g1_i1	32
TR26287|c1_g3_i1	22
TR26291|c0_g2_i1	14
TR26298|c0_g1_i4	40
TR26299|c0_g1_i2	34
TR26317|c1_g1_i3	26
TR26317|c1_g1_i5	40
TR2632|c1_g1_i2	104
TR2632|c1_g1_i4	122
TR26323|c0_g1_i5	42
TR26327|c0_g2_i1	18
TR26332|c0_g1_i3	28
TR26339|c0_g2_i1	16
TR2634|c1_g1_i2	36
TR26341|c0_g1_i2	74
TR26341|c0_g1_i4	30
TR26342|c0_g1_i2	44
TR26342|c0_g1_i3	86
TR26365|c0_g1_i4	182
TR26369|c1_g2_i1	30
TR26369|c1_g5_i2	190
TR26369|c1_g7_i1	56
TR26369|c1_g7_i2	58
TR26376|c0_g1_i1	96
TR26379|c0_g1_i4	334
TR2638|c0_g1_i1	42
TR26386|c0_g1_i3	18
TR26387|c0_g1_i5	64
TR26390|c0_g1_i3	140
TR26399|c0_g1_i1	66
TR26399|c0_g1_i6	106
TR2640|c0_g2_i1	36
TR2640|c0_g2_i2	200
TR26407|c0_g1_i1	24
TR26410|c0_g3_i1	14
TR26413|c0_g1_i4	126
TR26418|c1_g1_i3	44
TR26421|c0_g1_i1	52
TR26432|c0_g2_i1	68
TR26435|c0_g1_i1	32
TR2644|c0_g2_i2	284
TR26446|c1_g1_i2	512
TR26454|c0_g1_i1	272
TR26466|c0_g1_i3	36
TR26476|c0_g2_i3	198
TR2648|c0_g3_i5	70
TR26480|c0_g1_i2	102
TR2653|c2_g1_i2	1098
TR26538|c0_g1_i3	72
TR26538|c0_g1_i6	32
TR26549|c0_g2_i2	26
TR2655|c0_g5_i7	130
TR26550|c0_g4_i1	18
TR26561|c0_g1_i1	94
TR26566|c0_g1_i2	30
TR26572|c0_g1_i4	64
TR26582|c0_g1_i2	34
TR26582|c0_g1_i5	36
TR2660|c0_g1_i1	176
TR2660|c0_g1_i5	166
TR26600|c0_g1_i1	738
TR26607|c0_g1_i1	70
TR26610|c0_g1_i1	34
TR26614|c0_g1_i1	178
TR26618|c0_g1_i3	22
TR26619|c0_g1_i1	20
TR26620|c0_g1_i1	62
TR26623|c0_g1_i4	30
TR26629|c0_g2_i1	28
TR26629|c0_g4_i1	14
TR26630|c1_g1_i1	172
TR26634|c0_g1_i1	32
TR2664|c2_g3_i3	60
TR26645|c0_g1_i1	514
TR26645|c0_g1_i4	172
TR26650|c0_g3_i1	62
TR26657|c0_g1_i2	34
TR2666|c1_g2_i7	248
TR2666|c2_g1_i3	530
TR2666|c2_g1_i4	200
TR2666|c2_g3_i1	26
TR2666|c3_g1_i1	12
TR26660|c0_g1_i4	32
TR26662|c5_g1_i4	44
TR26666|c0_g5_i1	130
TR26666|c0_g6_i1	24
TR26668|c0_g1_i6	34
TR26671|c0_g1_i1	64
TR26671|c1_g1_i4	182
TR26671|c1_g1_i7	140
TR26674|c2_g1_i1	22
TR26674|c2_g1_i4	30
TR26683|c0_g1_i7	22
TR26687|c0_g1_i3	34
TR26688|c0_g3_i4	30
TR26698|c0_g2_i1	22
TR2670|c0_g1_i3	40
TR2670|c0_g1_i5	96
TR26702|c0_g1_i1	28
TR26704|c1_g1_i1	30
TR26705|c1_g2_i3	230
TR26705|c1_g3_i1	74
TR26711|c0_g1_i2	16
TR26711|c1_g1_i1	28
TR26716|c0_g1_i1	48
TR26717|c0_g2_i1	30
TR26717|c0_g2_i4	32
TR2672|c0_g3_i3	50
TR26723|c0_g1_i1	68
TR26728|c0_g1_i1	46
TR26731|c0_g1_i1	90
TR26744|c0_g1_i1	28
TR26747|c0_g1_i1	200
TR26747|c0_g1_i3	80
TR26749|c0_g1_i2	16
TR2675|c0_g2_i10	68
TR2675|c0_g2_i8	1084
TR26750|c0_g2_i1	22
TR26763|c0_g1_i1	30
TR26764|c0_g1_i2	36
TR2677|c0_g1_i3	80
TR26775|c0_g1_i1	400
TR26775|c0_g1_i2	234
TR26775|c0_g1_i4	212
TR26775|c0_g1_i7	432
TR26777|c0_g1_i4	22
TR2679|c2_g1_i1	50
TR2679|c2_g1_i2	52
TR26792|c0_g1_i1	42
TR26794|c0_g1_i2	34
TR26799|c0_g1_i2	24
TR26804|c0_g1_i3	16
TR26805|c0_g1_i2	88
TR26806|c0_g1_i3	32
TR26806|c0_g1_i4	40
TR26806|c0_g2_i6	32
TR26813|c1_g2_i1	38
TR26813|c2_g1_i1	514
TR26813|c2_g2_i1	210
TR26818|c0_g1_i4	48
TR26824|c0_g2_i1	68
TR26824|c0_g2_i2	64
TR26826|c0_g1_i4	36
TR26833|c0_g1_i2	138
TR26833|c0_g1_i3	434
TR2684|c0_g2_i5	70
TR2685|c0_g1_i1	42
TR2685|c0_g1_i7	26
TR26851|c0_g1_i4	182
TR26853|c2_g10_i1	24
TR26866|c0_g1_i2	130
TR2687|c0_g1_i2	118
TR26877|c0_g2_i1	114
TR2688|c0_g5_i3	68
TR26887|c1_g1_i1	578
TR26891|c0_g3_i4	62
TR26892|c0_g6_i1	40
TR26897|c0_g1_i2	310
TR26904|c0_g1_i1	46
TR26911|c0_g1_i1	20
TR26916|c0_g1_i2	104
TR26920|c0_g1_i1	70
TR26922|c1_g1_i1	50
TR26928|c0_g1_i2	20
TR2693|c1_g1_i2	40
TR26931|c0_g1_i1	66
TR26933|c0_g2_i1	72
TR26937|c0_g1_i4	22
TR26942|c0_g1_i3	14
TR26942|c0_g2_i2	46
TR26949|c0_g1_i1	22
TR26959|c1_g1_i1	648
TR26962|c0_g1_i3	82
TR26962|c0_g1_i5	64
TR26962|c0_g2_i1	60
TR26968|c0_g1_i2	20
TR26969|c0_g1_i2	656
TR2697|c0_g2_i2	76
TR2697|c0_g2_i3	74
TR2698|c0_g1_i11	196
TR2698|c0_g1_i12	136
TR26985|c0_g4_i1	26
TR26985|c0_g5_i1	24
TR2699|c1_g5_i2	20
TR2699|c1_g8_i2	48
TR26992|c0_g1_i1	26
TR26996|c0_g2_i2	28
TR26998|c0_g1_i1	32
TR26999|c0_g1_i1	42
TR27003|c0_g1_i2	52
TR27010|c0_g1_i1	32
TR27013|c0_g1_i4	60
TR27019|c2_g1_i1	120
TR27019|c2_g1_i2	102
TR2702|c0_g1_i2	32
TR27022|c1_g3_i1	138
TR27023|c0_g1_i1	62
TR27023|c1_g1_i1	330
TR2703|c0_g1_i4	66
TR27045|c0_g2_i1	28
TR27047|c0_g1_i3	68
TR27052|c0_g2_i1	136
TR2706|c0_g1_i1	56
TR27060|c0_g1_i2	58
TR27061|c0_g1_i1	80
TR27072|c0_g2_i1	34
TR27075|c0_g2_i1	370
TR27076|c0_g1_i1	90
TR27076|c0_g1_i3	184
TR27078|c0_g2_i2	94
TR27078|c0_g2_i3	46
TR27083|c0_g1_i3	3868
TR27085|c0_g1_i1	38
TR27086|c0_g1_i1	108
TR27088|c0_g1_i1	476
TR2709|c0_g2_i1	56
TR2709|c0_g3_i3	98
TR2709|c0_g3_i4	58
TR27095|c0_g1_i2	64
TR27096|c0_g1_i1	22
TR27100|c0_g3_i1	70
TR27103|c0_g3_i1	62
TR27104|c0_g2_i1	20
TR27107|c0_g2_i1	28
TR27117|c0_g1_i2	66
TR27118|c0_g1_i3	64
TR2712|c0_g1_i1	88
TR27123|c0_g3_i1	12
TR27127|c0_g1_i3	196
TR2713|c2_g1_i2	38
TR2713|c2_g1_i4	14
TR27130|c0_g2_i2	60
TR27136|c0_g1_i1	28
TR27136|c0_g4_i2	234
TR27141|c0_g4_i1	32
TR27153|c0_g1_i1	106
TR27161|c0_g1_i2	38
TR27162|c0_g1_i1	74
TR27162|c0_g1_i3	34
TR27167|c0_g1_i4	44
TR27181|c0_g1_i4	32
TR27187|c0_g1_i3	20
TR2719|c0_g1_i2	16
TR2719|c0_g1_i6	268
TR27197|c0_g1_i2	276
TR27200|c0_g1_i1	60
TR27201|c0_g1_i1	64
TR27201|c1_g1_i1	68
TR27202|c0_g3_i1	16
TR2722|c1_g1_i11	42
TR2722|c1_g1_i5	94
TR2722|c1_g1_i7	114
TR27221|c0_g1_i2	40
TR27226|c0_g1_i2	1690
TR27233|c0_g1_i2	40
TR27235|c0_g1_i1	98
TR27238|c0_g1_i2	232
TR27238|c0_g1_i3	728
TR2724|c0_g2_i2	84
TR27252|c0_g1_i2	38
TR27265|c1_g1_i1	36
TR2727|c0_g1_i4	66
TR27276|c0_g1_i2	80
TR27279|c1_g3_i2	72
TR27280|c0_g1_i1	28
TR27285|c0_g1_i3	32
TR27291|c0_g1_i5	28
TR27297|c2_g4_i1	26
TR2730|c0_g7_i3	14
TR27306|c0_g1_i2	30
TR27307|c1_g1_i1	222
TR27307|c1_g1_i3	158
TR2731|c0_g2_i1	32
TR2731|c0_g2_i3	170
TR2731|c0_g4_i1	40
TR27313|c0_g1_i1	40
TR27317|c1_g1_i1	90
TR27319|c0_g1_i1	52
TR2732|c1_g2_i1	68
TR2732|c2_g1_i2	14
TR2732|c2_g6_i1	18
TR27323|c1_g1_i1	28
TR2733|c1_g1_i2	76
TR2733|c1_g1_i4	56
TR27330|c0_g1_i2	14
TR27331|c0_g1_i3	52
TR27335|c1_g7_i1	32
TR27336|c0_g6_i1	22
TR27339|c0_g2_i1	22
TR2735|c0_g2_i2	16
TR27353|c0_g1_i1	120
TR27353|c0_g1_i2	38
TR2736|c0_g1_i1	552
TR27364|c0_g1_i3	132
TR27366|c0_g2_i1	134
TR27366|c0_g2_i3	278
TR27385|c0_g1_i3	30
TR27391|c0_g1_i1	16
TR27394|c0_g1_i1	98
TR27406|c1_g1_i1	28
TR27408|c0_g2_i2	72
TR2741|c1_g1_i3	36
TR27411|c0_g1_i1	1836
TR27414|c0_g3_i1	128
TR27429|c0_g1_i1	54
TR27443|c0_g1_i1	20
TR2745|c0_g4_i3	92
TR27450|c0_g2_i1	12
TR27472|c0_g1_i2	28
TR27472|c0_g1_i3	46
TR27477|c0_g1_i3	54
TR27479|c0_g1_i3	48
TR27479|c0_g1_i4	142
TR27479|c0_g4_i3	138
TR27483|c1_g1_i2	86
TR27487|c0_g2_i2	16
TR27488|c0_g1_i2	118
TR27489|c0_g1_i1	30
TR27492|c0_g1_i2	30
TR27496|c1_g2_i1	96
TR27497|c1_g2_i1	12
TR2750|c2_g2_i1	58
TR2750|c2_g3_i3	194
TR2750|c4_g14_i1	28
TR2750|c4_g3_i3	44
TR2750|c4_g3_i4	104
TR2750|c4_g3_i5	100
TR2750|c4_g3_i6	86
TR2750|c4_g7_i2	100
TR27502|c0_g1_i2	60
TR27505|c0_g1_i4	72
TR27507|c0_g1_i2	144
TR27510|c0_g1_i2	648
TR2753|c1_g6_i3	990
TR27535|c0_g3_i3	200
TR27544|c0_g1_i2	34
TR2755|c1_g1_i5	46
TR2755|c1_g2_i6	32
TR27550|c0_g1_i2	110
TR27554|c0_g1_i5	118
TR27558|c0_g3_i1	48
TR2756|c1_g1_i1	22
TR2756|c4_g4_i11	116
TR2756|c4_g4_i8	70
TR27560|c0_g1_i1	100
TR27561|c0_g1_i4	42
TR27563|c0_g1_i1	36
TR27563|c0_g1_i2	38
TR27570|c0_g1_i1	96
TR27576|c0_g1_i4	118
TR27587|c0_g1_i2	66
TR27590|c0_g1_i3	138
TR27590|c0_g1_i4	38
TR27590|c0_g2_i1	70
TR27591|c0_g1_i2	346
TR27599|c0_g1_i2	114
TR27599|c0_g1_i4	82
TR27607|c0_g1_i4	58
TR27612|c0_g9_i3	84
TR27612|c0_g9_i4	118
TR27614|c0_g2_i1	50
TR27615|c0_g1_i2	102
TR27616|c0_g2_i1	42
TR27618|c0_g1_i1	172
TR2762|c1_g1_i1	34
TR2762|c4_g2_i12	34
TR2762|c4_g2_i19	256
TR2762|c4_g2_i4	80
TR2762|c4_g2_i8	246
TR2762|c4_g2_i9	182
TR27627|c1_g1_i4	178
TR27627|c1_g1_i8	216
TR27627|c1_g1_i9	152
TR27628|c0_g3_i2	20
TR27630|c0_g1_i1	338
TR27633|c0_g1_i1	310
TR27633|c0_g1_i2	280
TR27639|c0_g1_i1	78
TR27639|c0_g2_i2	1658
TR27641|c1_g1_i1	58
TR27641|c1_g1_i4	24
TR27646|c0_g1_i2	212
TR2765|c0_g1_i5	58
TR27654|c0_g1_i1	26
TR27658|c0_g2_i1	72
TR27659|c0_g1_i3	62
TR2766|c0_g1_i3	230
TR27664|c0_g1_i2	26
TR27665|c0_g3_i2	244
TR2767|c1_g1_i1	44
TR2767|c1_g1_i5	30
TR2767|c1_g1_i8	48
TR27671|c0_g2_i1	66
TR27671|c0_g2_i2	124
TR27675|c0_g3_i1	46
TR27681|c0_g1_i3	114
TR27683|c0_g1_i4	40
TR27686|c0_g1_i3	42
TR27693|c0_g1_i1	78
TR27693|c0_g2_i2	14
TR2770|c0_g2_i1	226
TR27700|c0_g2_i4	68
TR27701|c0_g1_i3	18
TR27704|c0_g1_i1	112
TR27710|c0_g1_i3	50
TR27718|c0_g1_i3	38
TR27721|c0_g1_i3	56
TR27725|c0_g1_i1	92
TR27733|c0_g1_i1	32
TR27733|c0_g1_i4	42
TR27733|c0_g1_i5	40
TR27739|c0_g1_i1	70
TR27740|c0_g1_i3	70
TR27742|c0_g1_i1	28
TR27742|c0_g3_i2	26
TR27749|c0_g1_i3	166
TR27749|c0_g1_i4	126
TR27760|c0_g1_i1	74
TR27760|c0_g1_i3	54
TR27762|c0_g2_i1	34
TR27762|c0_g2_i2	44
TR27762|c0_g2_i3	60
TR27767|c0_g1_i2	40
TR27772|c0_g1_i1	28
TR27773|c0_g2_i1	24
TR27777|c0_g1_i7	270
TR27787|c0_g3_i1	56
TR2779|c0_g1_i4	30
TR27794|c0_g1_i6	78
TR27795|c0_g3_i1	44
TR27797|c4_g2_i3	106
TR27799|c0_g1_i3	36
TR2780|c0_g2_i1	108
TR27804|c0_g1_i1	86
TR27805|c0_g1_i1	24
TR27808|c0_g1_i2	28
TR27815|c2_g1_i1	358
TR27815|c2_g1_i2	56
TR27815|c2_g1_i7	276
TR27822|c0_g3_i1	34
TR27823|c0_g2_i1	494
TR27824|c4_g11_i1	190
TR27827|c0_g1_i2	120
TR27832|c0_g2_i2	58
TR27836|c0_g1_i2	124
TR27836|c0_g1_i3	64
TR27837|c0_g1_i1	70
TR2785|c0_g5_i1	32
TR2785|c0_g5_i11	28
TR27860|c0_g1_i4	88
TR27862|c0_g2_i1	34
TR27865|c0_g1_i1	14
TR27866|c0_g1_i3	46
TR27867|c0_g1_i1	112
TR27867|c0_g1_i3	50
TR2787|c2_g3_i1	52
TR2787|c2_g3_i3	50
TR2787|c2_g3_i7	56
TR27870|c0_g1_i2	124
TR27871|c0_g1_i4	26
TR27871|c0_g1_i5	20
TR27873|c0_g1_i1	194
TR27877|c0_g4_i4	40
TR27877|c0_g4_i5	24
TR27878|c1_g1_i1	52
TR27878|c3_g4_i1	64
TR27878|c3_g6_i1	78
TR27889|c0_g1_i1	270
TR27889|c0_g1_i2	166
TR2789|c1_g2_i1	198
TR2789|c1_g4_i2	44
TR27893|c0_g1_i1	76
TR27899|c0_g1_i3	96
TR27902|c0_g2_i2	26
TR27905|c0_g1_i3	24
TR27906|c0_g7_i1	26
TR27907|c0_g1_i3	400
TR27909|c0_g1_i2	270
TR27917|c0_g1_i1	18
TR2792|c1_g7_i2	418
TR27921|c0_g1_i1	70
TR27925|c1_g3_i3	42
TR27929|c0_g1_i2	74
TR2793|c0_g4_i3	3508
TR2793|c0_g5_i1	4122
TR27937|c0_g1_i2	168
TR27941|c0_g1_i1	28
TR27946|c0_g2_i3	40
TR27951|c0_g1_i3	82
TR27956|c0_g1_i1	56
TR27960|c0_g1_i4	50
TR27960|c0_g1_i5	70
TR27969|c0_g1_i1	40
TR27969|c0_g2_i1	14
TR27971|c0_g1_i1	36
TR27974|c0_g1_i2	38
TR27976|c0_g2_i5	54
TR27976|c0_g2_i7	46
TR27983|c0_g4_i1	22
TR27985|c1_g1_i1	144
TR27986|c0_g1_i3	48
TR27986|c0_g1_i4	22
TR27987|c0_g2_i4	80
TR27988|c0_g1_i3	24
TR27989|c0_g1_i2	178
TR27992|c0_g1_i7	54
TR27998|c1_g2_i1	106
TR2800|c0_g2_i2	14
TR28004|c0_g1_i6	138
TR28005|c0_g7_i1	574
TR28005|c0_g9_i1	126
TR28007|c0_g2_i1	74
TR2801|c1_g2_i2	32
TR28010|c0_g1_i2	42
TR28012|c0_g1_i2	54
TR28013|c0_g1_i2	144
TR28030|c1_g1_i2	486
TR28037|c0_g1_i5	118
TR28042|c0_g1_i3	20
TR28043|c0_g1_i2	138
TR28045|c0_g1_i1	76
TR28047|c0_g2_i3	106
TR28049|c3_g2_i4	142
TR2805|c0_g1_i1	1470
TR28050|c0_g1_i3	64
TR28051|c0_g1_i3	134
TR28051|c0_g1_i5	100
TR28054|c0_g2_i3	28
TR2806|c0_g1_i1	30
TR28062|c1_g2_i1	42
TR28062|c2_g1_i1	18
TR2807|c0_g1_i1	26
TR2807|c0_g1_i3	14
TR2807|c0_g1_i5	58
TR28071|c0_g1_i1	56
TR28077|c1_g1_i1	86
TR28084|c0_g1_i1	68
TR28084|c0_g5_i1	36
TR28085|c0_g2_i2	82
TR28086|c0_g1_i2	22
TR28091|c0_g1_i14	36
TR28096|c0_g1_i1	72
TR28100|c0_g1_i1	66
TR28105|c0_g2_i1	12
TR28108|c0_g4_i6	40
TR2811|c0_g2_i1	52
TR2811|c0_g5_i1	58
TR28120|c0_g1_i2	28
TR28123|c1_g5_i3	40
TR28125|c0_g1_i1	36
TR28127|c1_g1_i1	88
TR2813|c0_g1_i1	60
TR2813|c0_g3_i2	24
TR28132|c0_g1_i1	110
TR28133|c0_g1_i2	36
TR28134|c0_g1_i3	186
TR28138|c0_g1_i2	56
TR2814|c0_g2_i2	16
TR28168|c0_g2_i5	62
TR28170|c0_g1_i4	72
TR28172|c0_g1_i2	42
TR2818|c3_g2_i10	36
TR2818|c3_g2_i4	36
TR28195|c0_g1_i3	104
TR28197|c0_g1_i3	94
TR28199|c0_g1_i1	318
TR2820|c1_g2_i3	64
TR28204|c0_g1_i3	62
TR28206|c0_g4_i1	52
TR28209|c0_g1_i4	46
TR28215|c1_g1_i3	106
TR28217|c0_g1_i3	30
TR28219|c0_g2_i1	24
TR28220|c0_g1_i2	24
TR28224|c0_g1_i1	308
TR28224|c0_g9_i2	242
TR28226|c0_g1_i2	48
TR28227|c0_g1_i1	14
TR28227|c0_g2_i1	54
TR2823|c0_g1_i2	58
TR28231|c0_g2_i1	30
TR28231|c0_g4_i1	50
TR28233|c0_g2_i1	430
TR28234|c0_g3_i3	70
TR28236|c0_g1_i3	84
TR28237|c0_g1_i1	42
TR28239|c0_g1_i4	586
TR2824|c0_g6_i3	20
TR28240|c0_g1_i3	36
TR28243|c0_g1_i1	60
TR28249|c1_g1_i1	48
TR28249|c1_g1_i4	116
TR2825|c1_g1_i10	44
TR28252|c0_g2_i3	40
TR28252|c0_g2_i4	12
TR28255|c0_g3_i1	118
TR28255|c0_g3_i3	82
TR28256|c0_g3_i1	374
TR28265|c0_g1_i1	110
TR2827|c0_g2_i3	36
TR2827|c0_g2_i4	90
TR28270|c0_g1_i2	34
TR2828|c0_g2_i5	22
TR28282|c1_g1_i6	156
TR28284|c0_g1_i5	72
TR28284|c0_g3_i1	54
TR28285|c0_g1_i2	66
TR28286|c0_g2_i1	50
TR28286|c0_g2_i2	14
TR28286|c0_g3_i1	16
TR28287|c0_g1_i1	34
TR28288|c0_g2_i1	28
TR28291|c0_g3_i2	46
TR28295|c0_g2_i1	38
TR28299|c0_g1_i1	78
TR28301|c0_g1_i2	30
TR28301|c0_g1_i4	30
TR28303|c0_g2_i1	44
TR28303|c0_g2_i3	42
TR28311|c0_g1_i3	24
TR28314|c0_g2_i3	926
TR28318|c0_g1_i1	64
TR2832|c0_g2_i2	62
TR28321|c0_g2_i1	52
TR28325|c0_g2_i1	58
TR28325|c0_g2_i2	28
TR28330|c1_g1_i4	318
TR28334|c0_g1_i1	134
TR28335|c0_g1_i1	62
TR28338|c0_g3_i2	44
TR28341|c1_g2_i1	52
TR28347|c0_g4_i1	76
TR28348|c0_g1_i2	36
TR28350|c0_g2_i5	54
TR28351|c0_g1_i4	24
TR28352|c0_g1_i1	24
TR28356|c0_g1_i1	154
TR28356|c0_g1_i4	162
TR28356|c0_g1_i7	40
TR28357|c2_g1_i1	118
TR2836|c0_g1_i1	14
TR2836|c0_g2_i1	52
TR2836|c0_g4_i4	134
TR28368|c0_g3_i1	12
TR28370|c0_g2_i1	18
TR28371|c0_g1_i5	30
TR28374|c0_g1_i4	150
TR28390|c0_g2_i1	80
TR28394|c0_g1_i3	38
TR28396|c0_g1_i1	36
TR28396|c0_g1_i5	64
TR28399|c0_g3_i1	112
TR28404|c0_g2_i2	12
TR28405|c0_g1_i3	12
TR28407|c0_g1_i1	22
TR28407|c0_g2_i1	22
TR28407|c0_g4_i1	14
TR28408|c0_g1_i2	42
TR2841|c0_g1_i9	62
TR28411|c0_g4_i2	42
TR28415|c0_g1_i7	104
TR28417|c0_g1_i3	16
TR2842|c0_g3_i2	810
TR28420|c0_g1_i1	16
TR28422|c0_g2_i1	40
TR28425|c0_g1_i4	96
TR28426|c0_g2_i1	22
TR28427|c1_g2_i2	16
TR28428|c0_g1_i1	24
TR28431|c0_g1_i3	28
TR28446|c0_g5_i4	28
TR28447|c0_g1_i4	54
TR28448|c0_g1_i3	108
TR28448|c0_g1_i4	106
TR28449|c1_g1_i7	230
TR28452|c0_g1_i4	24
TR28457|c2_g1_i3	48
TR28459|c0_g1_i1	32
TR28460|c0_g1_i3	22
TR28470|c0_g1_i1	12
TR2848|c0_g1_i1	66
TR2848|c0_g2_i2	32
TR2849|c0_g1_i3	64
TR28493|c0_g1_i1	494
TR2850|c1_g4_i3	184
TR28526|c0_g2_i1	54
TR28530|c1_g1_i5	74
TR28530|c1_g4_i1	88
TR28534|c1_g1_i1	62
TR28545|c0_g2_i3	28
TR28548|c0_g1_i2	36
TR28549|c0_g1_i1	114
TR2855|c0_g1_i2	86
TR28550|c2_g4_i3	18
TR28554|c0_g2_i1	100
TR28554|c0_g3_i1	38
TR28555|c0_g2_i3	120
TR28558|c0_g1_i2	252
TR28566|c0_g1_i1	966
TR2857|c1_g1_i1	746
TR2857|c1_g1_i2	34
TR28579|c0_g2_i5	18
TR28588|c0_g1_i1	82
TR28591|c0_g1_i1	116
TR28604|c0_g1_i2	36
TR28605|c1_g1_i2	14
TR28608|c0_g1_i3	174
TR28614|c1_g8_i1	22
TR28615|c0_g1_i1	12
TR28616|c0_g1_i2	282
TR28616|c0_g1_i3	68
TR28616|c0_g1_i5	1222
TR28617|c0_g1_i3	38
TR28619|c0_g4_i1	38
TR28620|c0_g1_i3	464
TR28620|c0_g1_i4	138
TR28620|c0_g1_i6	976
TR28621|c0_g1_i1	34
TR28622|c1_g4_i3	74
TR28624|c2_g5_i2	14
TR28626|c0_g1_i5	194
TR28627|c0_g4_i1	42
TR28633|c0_g1_i2	54
TR28633|c0_g2_i2	38
TR28634|c0_g1_i2	104
TR28650|c0_g1_i3	28
TR28656|c0_g1_i1	40
TR28660|c0_g2_i1	98
TR28665|c1_g4_i1	28
TR28665|c1_g6_i1	18
TR28665|c1_g7_i14	22
TR28668|c1_g1_i1	34
TR2867|c0_g1_i2	42
TR28671|c0_g2_i2	36
TR28678|c0_g1_i3	18
TR28693|c0_g1_i1	66
TR28693|c0_g1_i2	78
TR28693|c0_g2_i2	28
TR28694|c0_g1_i1	28
TR28695|c0_g2_i1	1104
TR2871|c1_g1_i1	62
TR28710|c0_g1_i4	26
TR28713|c0_g3_i1	14
TR28713|c0_g3_i9	20
TR28724|c0_g1_i2	378
TR28729|c0_g1_i1	20
TR2873|c0_g1_i4	98
TR28736|c1_g1_i6	90
TR28749|c0_g1_i3	28
TR28749|c0_g2_i1	26
TR2875|c0_g1_i1	70
TR28754|c0_g1_i2	50
TR28754|c0_g1_i4	36
TR28757|c0_g2_i1	20
TR28757|c0_g4_i1	36
TR28761|c1_g1_i1	84
TR28761|c1_g1_i3	130
TR28761|c1_g1_i4	88
TR28761|c1_g1_i5	42
TR28765|c0_g1_i2	86
TR28767|c0_g1_i5	78
TR28780|c0_g1_i4	70
TR28787|c0_g1_i1	150
TR28787|c0_g1_i9	62
TR28790|c0_g1_i2	82
TR28792|c0_g1_i3	36
TR28795|c0_g4_i1	118
TR28795|c0_g4_i3	114
TR28800|c0_g1_i2	32
TR28802|c2_g2_i11	166
TR28802|c2_g2_i12	86
TR28802|c2_g2_i4	112
TR28802|c2_g2_i7	106
TR28802|c2_g6_i1	36
TR28814|c0_g2_i2	14
TR28814|c0_g2_i6	66
TR28816|c1_g2_i2	42
TR28819|c0_g1_i2	52
TR28823|c1_g1_i3	50
TR28823|c1_g1_i9	40
TR28844|c1_g1_i4	56
TR28848|c1_g2_i1	52
TR28853|c0_g3_i2	184
TR28855|c0_g1_i1	218
TR28860|c0_g1_i6	66
TR28861|c0_g2_i1	24
TR28864|c0_g4_i2	14
TR28867|c1_g17_i1	38
TR28872|c0_g1_i2	186
TR28873|c0_g1_i1	432
TR28878|c2_g1_i2	100
TR28878|c2_g1_i4	158
TR28881|c0_g1_i2	90
TR28883|c0_g2_i2	22
TR28888|c0_g1_i1	46
TR28891|c0_g1_i2	82
TR28891|c0_g2_i1	34
TR28892|c0_g2_i1	200
TR28895|c0_g1_i3	402
TR28896|c0_g1_i2	52
TR28900|c0_g1_i1	146
TR28900|c0_g1_i3	44
TR28903|c0_g1_i1	20
TR28904|c0_g1_i3	46
TR28906|c0_g1_i1	28
TR2891|c0_g1_i4	378
TR28910|c1_g1_i2	158
TR28912|c0_g1_i1	76
TR28913|c0_g1_i1	54
TR28925|c0_g1_i3	132
TR28926|c0_g1_i4	66
TR28927|c0_g2_i1	220
TR28927|c0_g3_i1	112
TR28929|c1_g6_i2	164
TR28939|c0_g1_i4	32
TR28943|c0_g2_i3	56
TR28943|c0_g3_i1	130
TR28946|c0_g1_i2	68
TR28946|c0_g1_i3	38
TR28947|c0_g1_i1	36
TR28947|c1_g1_i2	30
TR28950|c0_g1_i3	24
TR28953|c2_g1_i4	596
TR2896|c1_g1_i1	192
TR2896|c1_g1_i4	632
TR2896|c1_g1_i8	912
TR28963|c0_g1_i3	36
TR28966|c0_g1_i1	46
TR28966|c0_g2_i1	16
TR2897|c0_g1_i2	60
TR28979|c0_g1_i1	30
TR28982|c0_g2_i1	28
TR2899|c3_g3_i1	18
TR28990|c0_g1_i4	144
TR28991|c0_g1_i2	48
TR28991|c0_g3_i1	64
TR28994|c0_g1_i2	42
TR2900|c0_g1_i1	50
TR2900|c0_g2_i1	678
TR2900|c0_g2_i4	68
TR29001|c0_g4_i2	126
TR29001|c0_g4_i3	52
[truncated: 22,247 more rows]

## Sheet: OB_P1 specific
TrID	OB_P1
TR10077|c0_g1_i1	12
TR1128|c0_g1_i1	14
TR11878|c0_g1_i1	12
TR12578|c0_g1_i1	16
TR13914|c0_g1_i1	16
TR1399|c0_g1_i1	14
TR15012|c0_g2_i1	14
TR15804|c0_g1_i1	28
TR16454|c0_g1_i1	40
TR16793|c0_g1_i1	26
TR17324|c0_g1_i1	30
TR18702|c0_g1_i1	16
TR18831|c0_g1_i1	10
TR18920|c0_g1_i1	12
TR19158|c0_g1_i1	48
TR19437|c0_g1_i1	40
TR19595|c0_g1_i1	36
TR19948|c0_g1_i1	22
TR20234|c0_g1_i1	26
TR20268|c0_g1_i1	24
TR20752|c0_g1_i1	20
TR20904|c0_g1_i1	36
TR21007|c0_g1_i3	42
TR21055|c0_g1_i6	64
TR21070|c0_g1_i1	20
TR21214|c0_g1_i1	14
TR2158|c0_g1_i1	48
TR21622|c0_g1_i1	30
TR21665|c0_g1_i1	20
TR21670|c0_g1_i1	20
TR2173|c0_g1_i3	62
TR21853|c0_g1_i2	28
TR21899|c0_g1_i1	26
TR2192|c0_g1_i1	224
TR22096|c0_g1_i1	22
TR2223|c0_g1_i1	14
TR22362|c0_g1_i1	22
TR22440|c0_g1_i1	16
TR2263|c1_g2_i1	46
TR2270|c0_g1_i1	114
TR22707|c0_g1_i1	66
TR22783|c0_g1_i1	18
TR22836|c0_g2_i1	16
TR22848|c0_g2_i1	30
TR2286|c0_g1_i2	26
TR22941|c0_g1_i2	38
TR2296|c0_g4_i1	22
TR23046|c0_g1_i1	20
TR2311|c0_g4_i1	64
TR23163|c0_g1_i1	20
TR23190|c0_g1_i2	26
TR23354|c0_g1_i3	18
TR2338|c0_g1_i3	286
TR2345|c0_g1_i1	86
TR2345|c0_g1_i2	58
TR2355|c1_g2_i5	42
TR2361|c2_g1_i4	24
TR23627|c0_g1_i2	30
TR23663|c0_g1_i1	32
TR23843|c0_g1_i1	16
TR23892|c1_g1_i1	40
TR23892|c1_g1_i2	44
TR23930|c0_g1_i1	20
TR2408|c0_g1_i10	30
TR2408|c0_g1_i9	36
TR2413|c0_g5_i1	44
TR24174|c0_g1_i2	20
TR24227|c0_g1_i3	52
TR24289|c0_g3_i2	40
TR24552|c1_g1_i2	38
TR24557|c0_g1_i5	14
TR24641|c0_g1_i1	68
TR24674|c0_g1_i2	20
TR24960|c0_g1_i2	18
TR24988|c0_g1_i1	22
TR25037|c0_g1_i2	12
TR25070|c0_g1_i1	36
TR25112|c0_g1_i1	16
TR25124|c0_g2_i3	44
TR25248|c0_g2_i1	28
TR25385|c0_g3_i1	12
TR25548|c0_g1_i3	86
TR25680|c0_g1_i1	62
TR25833|c0_g1_i2	42
TR25892|c0_g1_i1	22
TR25892|c0_g1_i2	24
TR25892|c0_g1_i3	20
TR25919|c0_g1_i2	26
TR2605|c0_g1_i2	38
TR26061|c0_g1_i2	26
TR26072|c0_g1_i2	42
TR26185|c0_g1_i3	38
TR26227|c2_g1_i1	22
TR26299|c0_g1_i3	32
TR2632|c1_g1_i1	66
TR26378|c0_g1_i2	28
TR26443|c0_g1_i1	96
TR2655|c0_g3_i1	80
TR26605|c0_g1_i1	30
TR26616|c0_g1_i3	132
TR26679|c1_g2_i4	16
TR26704|c1_g1_i3	42
TR2672|c0_g1_i1	40
TR26722|c0_g1_i2	18
TR26729|c0_g2_i1	14
TR2673|c2_g2_i2	72
TR2673|c2_g2_i6	38
TR26892|c0_g5_i1	24
TR26907|c0_g1_i2	24
TR26922|c1_g1_i5	26
TR26949|c0_g1_i3	60
TR2699|c1_g5_i1	24
TR27055|c0_g6_i1	52
TR27079|c0_g1_i1	24
TR27079|c0_g2_i1	26
TR27086|c0_g2_i1	14
TR27134|c0_g1_i1	112
TR27254|c0_g1_i3	104
TR27376|c0_g1_i1	32
TR27472|c0_g2_i1	18
TR27494|c0_g1_i1	32
TR27519|c0_g1_i3	72
TR27527|c0_g1_i3	16
TR27648|c0_g3_i1	30
TR2769|c0_g1_i2	84
TR27744|c0_g1_i1	40
TR2778|c0_g2_i9	22
TR27818|c1_g1_i1	16
TR27831|c0_g1_i2	38
TR27860|c0_g1_i3	44
TR28035|c0_g1_i1	44
TR28081|c0_g1_i1	462
TR28116|c0_g2_i1	26
TR28126|c1_g1_i3	28
TR28140|c0_g1_i1	20
TR28218|c0_g1_i3	54
TR28236|c0_g3_i2	16
TR28302|c0_g2_i5	40
TR2831|c0_g1_i2	34
TR2832|c0_g1_i1	30
TR28347|c0_g1_i2	34
TR28380|c0_g1_i2	36
TR28385|c0_g1_i6	34
TR28409|c0_g1_i3	38
TR28458|c0_g1_i4	18
TR2847|c1_g5_i4	72
TR2847|c1_g5_i5	68
TR28599|c1_g1_i1	18
TR28668|c0_g1_i2	12
TR2870|c0_g1_i2	46
TR28816|c1_g2_i4	30
TR28845|c0_g1_i4	88
TR28846|c0_g4_i2	88
TR28853|c0_g2_i1	20
TR28880|c0_g1_i1	34
TR28880|c0_g3_i7	70
TR28883|c0_g1_i3	46
TR28903|c0_g8_i1	16
TR28915|c0_g2_i1	10
TR28924|c0_g1_i2	16
TR28950|c0_g1_i4	18
TR28958|c0_g1_i2	32
TR28972|c0_g1_i2	60
TR2902|c0_g1_i1	42
TR2902|c0_g1_i8	24
TR29038|c0_g1_i1	52
TR29049|c0_g1_i2	28
TR29064|c0_g6_i1	28
TR29083|c0_g1_i1	14
TR29122|c0_g2_i2	120
TR29145|c0_g1_i2	52
TR2918|c0_g1_i1	46
TR29243|c0_g2_i5	24
TR29254|c2_g1_i1	32
TR29332|c0_g1_i1	24
TR29357|c0_g2_i1	56
TR29415|c0_g1_i1	60
TR29517|c0_g1_i1	60
TR29519|c0_g1_i1	18
TR29540|c0_g3_i3	28
TR29629|c1_g5_i1	46
TR29638|c0_g1_i2	118
TR29642|c0_g1_i1	44
TR29675|c0_g1_i4	14
TR2968|c0_g1_i7	72
TR29694|c0_g2_i4	26
TR2973|c0_g4_i2	36
TR2976|c0_g2_i1	26
TR29824|c0_g1_i3	16
TR29848|c0_g1_i1	32
TR29871|c0_g2_i2	30
TR29886|c0_g2_i2	30
TR29940|c1_g1_i4	10
TR29964|c0_g1_i3	48
TR30026|c0_g1_i1	36
TR30032|c0_g1_i2	90
TR30130|c1_g2_i3	52
TR30130|c1_g8_i9	74
TR30171|c0_g3_i2	30
TR30216|c0_g2_i1	30
TR30222|c0_g2_i1	26
TR3026|c1_g1_i2	20
TR30309|c0_g2_i1	22
TR30389|c0_g1_i5	50
TR30417|c0_g1_i1	90
TR30419|c0_g1_i1	48
TR30546|c0_g1_i2	36
TR30554|c0_g1_i2	56
TR30591|c0_g1_i3	90
TR30660|c0_g1_i2	88
TR30670|c0_g4_i1	30
TR30675|c0_g2_i2	22
TR30699|c1_g3_i1	42
TR30703|c0_g3_i2	44
TR30761|c0_g1_i2	60
TR3078|c0_g1_i1	38
TR30783|c0_g5_i1	54
TR3079|c0_g1_i1	18
TR30792|c0_g2_i1	18
TR30804|c2_g1_i3	32
TR30840|c0_g2_i1	24
TR30892|c0_g1_i1	56
TR30903|c0_g1_i3	36
TR30928|c0_g4_i5	30
TR30944|c0_g2_i2	18
TR30946|c0_g2_i1	40
TR30950|c0_g1_i2	18
TR30961|c0_g1_i2	34
TR30985|c0_g1_i7	18
TR31020|c0_g1_i1	36
TR31045|c0_g1_i2	30
TR31048|c0_g1_i1	60
TR3105|c1_g1_i2	16
TR31066|c0_g6_i1	1972
TR31077|c0_g2_i3	26
TR31091|c0_g4_i4	28
TR3110|c0_g1_i1	84
TR31107|c0_g4_i2	24
TR3113|c0_g2_i5	26
TR31153|c0_g1_i1	50
TR31153|c0_g1_i3	16
TR31188|c0_g1_i3	14
TR31209|c0_g1_i1	112
TR31265|c0_g1_i1	24
TR31292|c0_g1_i4	88
TR3133|c0_g1_i5	28
TR31445|c0_g1_i1	44
TR31446|c0_g2_i1	18
TR3156|c1_g6_i3	32
TR31573|c1_g4_i1	76
TR31629|c0_g1_i2	96
TR31776|c1_g1_i1	14
TR31779|c0_g1_i7	48
TR31795|c0_g1_i2	80
TR31795|c0_g1_i4	36
TR31820|c0_g10_i4	146
TR31821|c0_g1_i1	26
TR31832|c1_g1_i4	18
TR31885|c1_g1_i1	24
TR31890|c0_g6_i1	14
TR31924|c0_g2_i3	116
TR31939|c0_g2_i2	26
TR31941|c0_g2_i1	16
TR31959|c0_g3_i3	58
TR31967|c0_g1_i3	34
TR32034|c0_g4_i4	68
TR32098|c0_g2_i4	48
TR32111|c1_g1_i1	14
TR32113|c1_g3_i1	42
TR32115|c1_g2_i1	30
TR32116|c0_g1_i3	104
TR32158|c0_g1_i3	22
TR32168|c0_g3_i2	228
TR32182|c0_g3_i4	12
TR32182|c0_g3_i7	28
TR32194|c0_g1_i1	18
TR32194|c0_g3_i1	12
TR32195|c0_g2_i1	18
TR32200|c0_g2_i1	38
TR32200|c0_g3_i1	32
TR32250|c0_g5_i1	22
TR32277|c1_g8_i1	22
TR32299|c0_g1_i1	160
TR32299|c0_g1_i2	132
TR32299|c0_g1_i3	54
TR32300|c3_g1_i2	26
TR32304|c0_g3_i7	22
TR32311|c1_g2_i5	22
TR32347|c0_g2_i7	68
TR3235|c0_g2_i2	28
TR32375|c0_g1_i1	112
TR32382|c1_g1_i5	24
TR32440|c0_g4_i1	16
TR32450|c0_g1_i2	18
TR32519|c2_g4_i3	42
TR3252|c0_g1_i4	74
TR3255|c0_g1_i1	42
TR3255|c0_g1_i3	108
TR32556|c0_g1_i1	46
TR32564|c1_g2_i1	12
TR32646|c0_g1_i3	40
TR32678|c0_g2_i1	128
TR32686|c0_g2_i3	20
TR32694|c3_g4_i1	166
TR32706|c0_g1_i3	46
TR32742|c2_g1_i2	56
TR32759|c1_g3_i6	228
TR32776|c1_g2_i1	62
TR32784|c0_g5_i1	26
TR32812|c0_g2_i1	28
TR32819|c0_g1_i1	108
TR32857|c0_g1_i1	30
TR32857|c0_g1_i5	50
TR32864|c0_g5_i1	24
TR32864|c0_g6_i1	108
TR32868|c0_g1_i4	50
TR32924|c0_g9_i1	14
TR32963|c1_g1_i4	26
TR32991|c2_g1_i8	24
TR32998|c1_g2_i3	12
TR33042|c0_g1_i1	16
TR33043|c0_g1_i1	42
TR33049|c1_g1_i1	28
TR33103|c0_g1_i1	84
TR33114|c0_g3_i3	38
TR33127|c0_g1_i2	22
TR33157|c0_g2_i2	22
TR33162|c0_g1_i1	24
TR33173|c0_g1_i5	54
TR3321|c0_g5_i1	34
TR33214|c1_g3_i1	12
TR33214|c1_g4_i2	10
TR33218|c0_g1_i1	12
TR33276|c0_g1_i2	34
TR33286|c1_g1_i1	24
TR33286|c1_g4_i1	22
TR33287|c0_g6_i3	24
TR33309|c0_g2_i1	52
TR33336|c0_g3_i1	30
TR33339|c0_g1_i5	118
TR33351|c2_g3_i1	16
TR33386|c0_g6_i1	22
TR33401|c0_g2_i1	16
TR33411|c0_g3_i2	172
TR33439|c0_g13_i5	3238
TR33466|c1_g2_i3	32
TR33593|c0_g4_i2	26
TR33598|c0_g1_i6	152
TR33599|c0_g2_i4	18
TR33624|c0_g1_i5	36
TR33660|c1_g4_i1	24
TR33711|c0_g1_i1	68
TR33711|c0_g1_i2	66
TR33711|c0_g1_i3	86
TR33723|c0_g1_i8	38
TR33732|c1_g2_i1	30
TR33734|c0_g1_i2	16
TR33752|c0_g1_i2	146
TR33755|c0_g1_i3	30
TR3376|c0_g1_i1	34
TR33762|c0_g2_i8	46
TR33779|c0_g2_i1	116
TR33804|c0_g1_i4	56
TR33817|c1_g2_i3	16
TR33822|c0_g2_i6	16
TR33827|c0_g2_i2	64
TR33856|c0_g1_i1	14
TR33874|c0_g1_i2	30
TR3388|c0_g1_i5	42
TR33890|c0_g1_i1	114
TR33920|c0_g1_i1	110
TR33948|c0_g5_i1	50
TR33958|c0_g1_i2	20
TR33973|c0_g1_i7	58
TR33980|c1_g1_i2	12
TR33989|c0_g2_i7	54
TR34013|c1_g1_i2	182
TR34055|c0_g3_i1	14
TR34070|c0_g1_i1	80
TR34072|c0_g1_i5	92
TR34123|c0_g1_i1	26
TR34126|c0_g2_i1	146
TR34126|c2_g5_i1	68
TR3416|c0_g2_i1	16
TR34179|c0_g1_i1	14
TR34179|c0_g1_i4	38
TR34194|c0_g2_i9	48
TR34266|c1_g1_i1	134
TR34271|c2_g5_i1	36
TR34277|c0_g1_i2	30
TR34296|c0_g1_i2	66
TR34318|c1_g3_i1	26
TR34373|c0_g1_i2	140
TR34373|c0_g1_i4	126
TR34377|c0_g1_i6	36
TR34382|c0_g3_i4	28
TR34390|c0_g1_i2	144
TR34414|c0_g2_i6	82
TR34417|c0_g2_i1	94
TR34459|c0_g3_i1	30
TR34468|c0_g8_i1	18
TR34482|c0_g1_i2	100
TR34496|c0_g1_i7	24
TR34508|c0_g1_i8	112
TR34542|c0_g4_i1	38
TR34565|c2_g5_i1	34
TR34576|c0_g3_i2	20
TR34625|c0_g1_i3	74
TR34627|c0_g2_i1	18
TR3463|c0_g2_i2	38
TR34640|c0_g1_i3	20
TR34640|c1_g1_i5	54
TR34643|c0_g1_i3	36
TR34666|c0_g1_i3	82
TR34721|c0_g1_i2	90
TR34742|c0_g1_i1	96
TR34759|c2_g2_i4	48
TR34760|c2_g1_i3	60
TR34768|c0_g1_i1	24
TR34770|c1_g1_i2	22
TR34776|c0_g1_i3	34
TR34776|c0_g2_i2	42
TR3480|c1_g1_i6	96
TR34810|c0_g3_i1	12
TR34846|c0_g1_i2	14
TR3485|c0_g3_i1	20
TR34894|c0_g5_i1	38
TR3491|c0_g2_i1	20
TR34919|c0_g1_i5	38
TR34920|c0_g1_i8	60
TR34988|c0_g1_i6	26
TR35006|c2_g1_i3	28
TR35017|c0_g1_i2	40
TR35040|c0_g2_i4	316
TR35051|c1_g1_i1	12
TR35051|c1_g5_i1	64
TR3506|c3_g1_i2	26
TR35066|c0_g2_i1	10
TR35080|c0_g1_i4	72
TR35086|c0_g1_i4	22
TR35091|c0_g1_i2	38
TR35133|c0_g1_i1	182
TR3514|c2_g11_i1	72
TR3515|c0_g1_i4	46
TR35169|c0_g1_i4	28
TR35233|c2_g2_i11	76
TR35233|c2_g2_i9	86
TR35237|c0_g1_i1	24
TR35242|c0_g1_i2	34
TR35242|c0_g2_i1	20
TR35263|c0_g2_i2	50
TR35266|c1_g1_i3	48
TR35266|c1_g3_i5	46
TR35267|c0_g1_i4	272
TR35279|c0_g4_i1	14
TR35289|c0_g1_i2	18
TR3529|c2_g1_i8	40
TR35305|c0_g1_i1	14
TR35340|c1_g1_i4	32
TR35350|c0_g2_i1	34
TR35357|c0_g1_i2	76
TR35371|c2_g1_i5	1110
TR35385|c0_g4_i1	36
TR35389|c0_g1_i3	70
TR35392|c0_g1_i4	62
TR35447|c0_g1_i4	66
TR35462|c0_g1_i1	486
TR35462|c0_g1_i3	164
TR3548|c1_g3_i1	40
TR35492|c1_g1_i1	80
TR35507|c0_g1_i1	32
TR35509|c0_g1_i4	18
TR3551|c0_g1_i3	52
TR35567|c0_g3_i2	62
TR3557|c0_g1_i3	22
TR3559|c0_g1_i2	28
TR35603|c1_g1_i1	14
TR35607|c0_g1_i1	96
TR35607|c0_g1_i8	116
TR35614|c1_g1_i3	32
TR35674|c0_g2_i7	76
TR35674|c0_g3_i1	12
TR35710|c0_g1_i5	58
TR35738|c0_g2_i4	58
TR35742|c0_g1_i5	76
TR35752|c0_g2_i1	18
TR35766|c2_g5_i2	24
TR35825|c0_g1_i1	116
TR35849|c4_g6_i1	20
TR35853|c2_g2_i1	40
TR35894|c0_g1_i3	34
TR35932|c1_g2_i1	22
TR35932|c1_g3_i1	24
TR35964|c0_g1_i3	76
TR35972|c0_g3_i5	54
TR35975|c0_g2_i1	26
TR35976|c0_g2_i3	72
TR35980|c2_g2_i1	50
TR35982|c0_g6_i1	46
TR35983|c0_g1_i2	78
TR35984|c0_g1_i4	68
TR36003|c0_g1_i1	26
TR36028|c1_g2_i1	30
TR36033|c1_g1_i1	76
TR36051|c0_g2_i1	20
TR36180|c0_g2_i1	36
TR36219|c0_g1_i1	18
TR36229|c0_g1_i1	184
TR36238|c1_g6_i3	36
TR36240|c0_g4_i2	42
TR36260|c0_g1_i2	72
TR36268|c1_g2_i1	14
TR36273|c0_g3_i1	50
TR36288|c0_g1_i1	26
TR36289|c0_g3_i16	48
TR36303|c0_g1_i1	16
TR36326|c1_g5_i8	12
TR36339|c1_g1_i2	444
TR36342|c0_g1_i6	72
TR36352|c0_g2_i3	56
TR36374|c0_g7_i2	10
TR36396|c0_g5_i2	54
TR36396|c0_g5_i3	40
TR36401|c0_g1_i1	14
TR36403|c0_g2_i1	92
TR36411|c0_g1_i10	28
TR36420|c0_g1_i7	34
TR36440|c0_g5_i1	20
TR36480|c1_g1_i5	90
TR36539|c0_g1_i1	96
TR36603|c3_g2_i5	188
TR36619|c0_g1_i4	326
TR36635|c0_g2_i1	46
TR36650|c0_g3_i6	26
TR3667|c3_g1_i3	94
TR3667|c3_g1_i4	48
TR36735|c0_g1_i1	114
TR36751|c0_g1_i2	40
TR36762|c1_g3_i1	12
TR36825|c1_g1_i7	38
TR36826|c1_g4_i1	28
TR36832|c0_g5_i1	58
TR36836|c1_g2_i4	90
TR36838|c1_g1_i9	202
TR36910|c1_g1_i4	24
TR36915|c1_g1_i2	18
TR36934|c0_g3_i10	38
TR36958|c0_g2_i4	176
TR36960|c0_g1_i4	92
TR36989|c0_g2_i3	66
TR36989|c0_g2_i4	104
TR36991|c1_g1_i2	120
TR36995|c0_g3_i1	764
TR37008|c0_g6_i1	10
TR37020|c1_g1_i1	24
TR37027|c0_g4_i2	14
TR3706|c1_g8_i1	16
TR37061|c0_g3_i1	18
TR37067|c0_g3_i1	26
TR37086|c1_g2_i5	66
TR37092|c4_g4_i2	94
TR3712|c0_g1_i1	42
TR37126|c0_g1_i1	50
TR37171|c3_g3_i3	24
TR37199|c0_g1_i3	158
TR37212|c0_g5_i5	40
TR37219|c2_g2_i4	50
TR37228|c0_g2_i1	52
TR37257|c1_g4_i2	28
TR37263|c3_g4_i1	40
TR3727|c0_g1_i5	82
TR37272|c1_g1_i7	78
TR37280|c0_g3_i6	40
TR37283|c0_g2_i2	32
TR37302|c0_g3_i1	32
TR37351|c0_g1_i2	66
TR37366|c0_g2_i2	14
TR37370|c0_g1_i3	68
TR37382|c0_g6_i2	24
TR37384|c0_g2_i4	42
TR37384|c0_g3_i1	42
TR3740|c0_g1_i1	12
TR37400|c0_g1_i1	34
TR3744|c0_g1_i1	12
TR37444|c3_g3_i1	30
TR37457|c0_g1_i11	84
TR37466|c0_g2_i1	74
TR37471|c2_g10_i3	104
TR37474|c1_g6_i2	132
TR37475|c0_g4_i1	34
TR37478|c0_g1_i1	20
TR37491|c0_g3_i5	48
TR37541|c1_g4_i1	16
TR37548|c0_g1_i2	44
TR37551|c1_g1_i4	32
TR37573|c1_g6_i6	54
TR37576|c0_g1_i1	26
TR37587|c0_g1_i3	38
TR37588|c1_g2_i1	36
TR37625|c0_g3_i1	20
TR37635|c0_g3_i9	50
TR3765|c0_g3_i1	10
TR37662|c0_g3_i1	10
TR3767|c0_g1_i1	24
TR37736|c0_g8_i1	48
TR37789|c0_g3_i1	18
TR37789|c0_g5_i2	18
TR3779|c0_g2_i2	18
TR3779|c0_g3_i1	94
TR37795|c0_g2_i6	118
TR37819|c2_g2_i2	40
TR37822|c0_g1_i1	10
TR37822|c0_g4_i3	42
TR37826|c0_g1_i2	68
TR37831|c2_g1_i1	36
TR37845|c0_g1_i2	22
TR37850|c0_g4_i3	30
TR37852|c1_g1_i3	54
TR37908|c0_g1_i4	84
TR37914|c0_g14_i1	130
TR37938|c1_g3_i2	74
TR37954|c1_g3_i6	12
TR37982|c1_g8_i1	18
TR37986|c1_g1_i1	20
TR37989|c1_g1_i1	14
TR38002|c0_g1_i2	70
TR38010|c0_g1_i7	26
TR38011|c2_g3_i5	12
TR38046|c0_g1_i5	50
TR3805|c1_g1_i6	16
TR38081|c1_g1_i3	176
TR38097|c0_g4_i3	16
TR38097|c0_g5_i3	24
TR38108|c0_g8_i3	36
TR38131|c0_g2_i1	14
TR38136|c1_g3_i5	54
TR38139|c0_g2_i1	20
TR38148|c0_g6_i1	176
TR38152|c0_g1_i3	22
TR38175|c1_g2_i1	18
TR38182|c0_g4_i1	22
TR38182|c0_g6_i1	38
TR38188|c0_g1_i6	410
TR38217|c1_g3_i3	30
TR38231|c0_g1_i5	72
TR38274|c0_g3_i5	64
TR38299|c0_g2_i1	50
TR38318|c1_g1_i2	76
TR38334|c0_g5_i2	80
TR38341|c0_g3_i2	28
TR38350|c0_g2_i4	72
TR38398|c0_g4_i2	14
TR38419|c0_g1_i2	62
TR3844|c1_g1_i9	18
TR38460|c0_g1_i2	82
TR38468|c0_g1_i1	14
TR38470|c0_g5_i3	34
TR38487|c0_g2_i4	22
TR3849|c0_g1_i5	42
TR38498|c0_g2_i1	150
TR3850|c0_g1_i1	1486
TR38514|c1_g1_i2	86
TR38598|c0_g1_i1	16
TR3861|c0_g1_i4	20
TR38613|c0_g2_i6	72
TR38625|c0_g1_i1	36
TR38638|c0_g1_i1	16
TR38658|c0_g1_i1	96
TR38662|c1_g2_i1	38
TR38681|c0_g2_i1	24
TR38728|c0_g1_i1	34
TR38740|c0_g2_i5	18
TR38752|c0_g2_i11	160
TR38754|c1_g1_i3	18
TR38766|c0_g6_i2	20
TR38773|c0_g1_i1	34
TR38773|c0_g1_i2	42
TR38795|c0_g1_i5	16
TR38800|c1_g1_i1	38
TR38810|c1_g1_i1	118
TR38810|c1_g1_i4	34
TR38841|c0_g2_i5	60
TR38841|c0_g2_i9	26
TR38888|c0_g2_i2	28
TR38911|c2_g1_i3	20
TR38914|c0_g8_i3	70
TR38952|c0_g1_i1	160
TR38967|c0_g1_i1	18
TR38967|c0_g2_i4	22
TR38968|c0_g4_i1	14
TR38975|c0_g2_i5	22
TR39003|c0_g3_i9	30
TR39028|c0_g2_i1	62
TR39037|c0_g2_i1	62
TR39041|c0_g5_i1	22
TR39043|c0_g1_i1	212
TR39082|c2_g1_i1	410
TR39095|c0_g1_i1	66
TR39115|c1_g1_i1	16
TR39121|c1_g1_i1	28
TR39129|c1_g1_i5	18
TR39141|c1_g4_i1	18
TR39158|c2_g6_i1	18
TR39160|c0_g1_i4	128
TR39176|c0_g1_i1	72
TR39188|c0_g3_i5	28
TR39189|c0_g1_i1	22
TR3921|c1_g6_i1	60
TR39212|c0_g1_i2	28
TR39244|c0_g2_i4	28
TR39252|c0_g2_i1	18
TR39256|c0_g4_i1	12
TR39262|c1_g2_i4	34
TR39262|c1_g2_i9	54
TR3928|c1_g1_i14	18
TR39289|c0_g1_i3	32
TR39298|c0_g3_i1	80
TR39302|c0_g4_i5	64
TR39334|c1_g3_i5	32
TR39338|c0_g3_i2	38
TR39341|c0_g1_i1	30
TR39343|c0_g4_i2	30
TR39376|c0_g5_i11	42
TR39382|c0_g1_i10	70
TR39389|c0_g2_i6	36
TR39396|c2_g8_i5	30
TR39414|c1_g5_i1	40
TR39472|c2_g3_i1	32
TR39473|c0_g3_i1	20
TR3954|c1_g6_i1	72
TR39550|c0_g1_i2	40
TR39567|c0_g1_i2	22
TR39586|c1_g1_i5	18
TR39592|c0_g1_i2	34
TR39609|c0_g1_i2	134
TR39614|c0_g4_i1	16
TR39616|c0_g1_i1	60
TR39679|c0_g1_i1	106
TR39685|c0_g2_i4	34
TR39685|c0_g2_i5	16
TR39695|c0_g1_i3	22
TR39718|c1_g1_i13	36
TR39757|c0_g3_i2	44
TR39770|c0_g2_i9	164
TR39803|c0_g2_i3	36
TR39825|c0_g4_i2	44
TR39841|c0_g2_i2	50
TR39846|c0_g1_i1	46
TR39846|c0_g3_i1	64
TR39852|c0_g3_i6	38
TR39855|c1_g2_i2	26
TR39857|c0_g1_i2	30
TR39857|c0_g1_i5	24
TR39866|c0_g2_i10	28
TR39867|c1_g3_i1	22
TR39869|c3_g2_i2	94
TR39870|c1_g1_i11	26
TR39872|c0_g3_i1	16
TR39874|c1_g1_i2	202
TR39880|c0_g1_i3	42
TR39897|c2_g1_i1	214
TR39950|c0_g2_i3	24
TR39964|c0_g4_i5	162
TR39967|c0_g9_i1	18
TR39974|c0_g3_i1	78
TR39974|c0_g3_i6	86
TR39990|c0_g2_i2	20
TR39997|c3_g1_i1	30
TR39997|c3_g4_i9	112
TR40016|c0_g3_i1	32
TR40021|c1_g1_i1	30
TR40037|c0_g2_i4	36
TR40040|c0_g3_i1	18
TR4005|c0_g1_i1	38
TR40050|c0_g1_i8	40
TR4010|c0_g1_i2	34
TR40117|c0_g2_i6	388
TR40134|c0_g4_i6	14
TR40154|c1_g5_i1	16
TR40172|c0_g2_i3	26
TR40202|c0_g2_i1	22
TR40202|c0_g2_i4	148
TR40202|c0_g3_i3	34
TR40204|c0_g6_i4	20
TR40206|c0_g1_i1	14
TR40220|c0_g1_i4	40
TR40228|c0_g1_i1	18
TR40264|c0_g1_i2	14
TR40299|c0_g2_i1	34
TR4030|c0_g2_i3	14
TR40308|c0_g1_i1	14
TR40313|c0_g1_i1	20
TR40322|c0_g4_i3	34
TR40357|c0_g5_i1	32
TR40369|c0_g1_i2	44
TR40385|c0_g2_i17	40
TR40386|c0_g2_i3	20
TR40421|c1_g1_i2	26
TR40426|c0_g5_i1	24
TR40458|c1_g3_i1	16
TR40459|c0_g1_i2	24
TR40475|c3_g4_i2	10
TR40486|c0_g3_i5	18
TR40489|c1_g1_i10	24
TR40492|c1_g1_i1	122
TR40495|c0_g8_i1	24
TR40534|c0_g1_i9	16
TR40536|c0_g2_i5	14
TR40542|c0_g1_i1	20
TR40543|c1_g3_i6	52
TR40553|c0_g2_i3	28
TR40554|c0_g5_i1	32
TR40580|c1_g2_i2	22
TR40594|c1_g6_i1	24
TR40618|c0_g2_i1	28
TR40618|c0_g3_i2	54
TR40620|c0_g1_i1	100
TR40631|c1_g2_i5	94
TR40631|c1_g2_i9	92
TR40632|c0_g3_i2	30
TR40646|c0_g1_i1	22
TR40649|c2_g1_i1	50
TR40663|c0_g3_i1	20
TR40673|c1_g3_i3	58
TR40682|c0_g6_i5	128
TR40691|c0_g2_i1	18
TR40691|c0_g3_i4	32
TR40696|c0_g1_i3	64
TR40699|c1_g1_i1	42
TR40708|c1_g2_i6	30
TR40708|c1_g4_i1	38
TR40717|c0_g4_i3	52
TR40728|c0_g1_i7	88
TR40736|c0_g3_i2	44
TR40745|c0_g1_i1	86
TR40749|c0_g1_i1	14
TR40769|c0_g2_i3	38
TR40777|c4_g6_i2	18
TR40791|c0_g2_i1	24
TR40799|c0_g2_i1	62
TR40813|c0_g3_i1	38
TR40829|c0_g2_i4	20
TR40845|c0_g2_i1	16
TR40851|c1_g1_i2	16
TR40882|c0_g1_i1	54
TR40894|c1_g7_i1	36
TR40899|c0_g1_i1	22
TR4090|c0_g1_i1	66
TR40930|c0_g1_i6	44
TR40932|c1_g5_i1	40
TR40976|c1_g3_i4	28
TR40999|c0_g1_i1	24
TR41032|c0_g1_i7	80
TR41088|c0_g8_i3	28
TR41094|c1_g5_i22	44
TR41097|c2_g5_i3	28
TR41127|c1_g4_i2	42
TR41132|c2_g1_i4	34
TR41139|c1_g4_i6	24
TR41142|c0_g1_i1	70
TR41144|c0_g5_i2	32
TR41171|c0_g3_i5	68
TR41202|c0_g4_i1	14
TR41213|c0_g1_i2	28
TR41224|c0_g3_i1	48
TR41237|c1_g1_i21	96
TR41266|c3_g5_i6	24
TR41272|c1_g1_i5	24
TR41273|c1_g3_i3	58
TR41292|c0_g1_i1	40
TR41309|c0_g1_i1	26
TR41313|c0_g2_i6	134
TR41341|c0_g4_i1	14
TR41403|c2_g1_i4	52
TR41405|c0_g4_i1	14
TR41405|c0_g5_i1	12
TR41407|c0_g2_i2	22
TR41446|c0_g4_i4	36
TR41459|c0_g1_i1	54
TR41463|c2_g2_i1	12
TR41473|c0_g1_i4	54
TR41485|c0_g1_i1	32
TR41489|c0_g4_i1	14
TR41562|c1_g6_i4	28
TR41573|c1_g6_i1	26
TR41612|c0_g1_i1	38
TR41624|c0_g1_i1	44
TR41624|c0_g3_i1	146
TR41626|c0_g2_i3	64
TR41649|c0_g1_i1	54
TR41652|c1_g1_i5	18
TR41661|c0_g5_i1	22
TR41671|c1_g1_i1	28
TR41688|c0_g4_i1	36
TR41700|c1_g3_i1	86
TR41743|c0_g3_i1	20
TR41750|c0_g1_i7	18
TR41762|c0_g11_i1	24
TR41762|c0_g2_i1	36
TR41776|c1_g1_i5	82
TR41790|c0_g4_i1	40
TR41799|c0_g3_i1	24
TR41803|c0_g5_i2	38
TR41804|c0_g1_i1	18
TR41808|c0_g1_i2	42
TR41813|c0_g4_i2	66
TR41818|c2_g6_i6	10
TR41866|c1_g1_i4	78
TR41868|c1_g3_i1	20
TR41877|c0_g2_i1	30
TR41885|c0_g4_i3	22
TR41903|c1_g6_i1	20
TR41904|c1_g1_i1	22
TR41938|c0_g3_i2	12
TR41944|c0_g1_i9	32
TR41944|c0_g3_i3	42
TR41956|c0_g3_i6	40
TR41964|c0_g8_i6	34
TR41995|c1_g1_i1	10
TR42015|c0_g5_i1	32
TR42035|c0_g3_i3	32
TR42042|c0_g6_i1	24
TR42067|c1_g1_i1	18
TR42077|c0_g1_i5	280
TR42085|c0_g4_i1	20
TR42090|c0_g3_i5	38
TR42104|c0_g5_i1	10
TR42111|c0_g1_i5	20
TR42112|c0_g1_i1	62
TR42133|c0_g1_i2	58
TR42137|c0_g3_i7	62
TR42138|c0_g1_i3	14
TR42184|c1_g6_i4	18
TR42191|c0_g1_i1	14
TR42206|c0_g3_i3	36
TR42217|c0_g3_i1	38
TR42241|c0_g1_i3	44
TR42254|c0_g1_i2	58
TR42264|c0_g1_i6	34
TR42291|c0_g2_i2	36
TR42294|c0_g3_i1	16
TR42296|c1_g3_i1	22
TR42300|c0_g2_i3	14
TR42300|c0_g3_i4	44
TR42305|c1_g2_i6	14
TR42316|c0_g2_i1	16
TR42322|c0_g7_i1	18
TR42335|c1_g1_i4	20
TR42338|c0_g2_i7	94
TR42341|c0_g1_i2	98
TR42346|c1_g2_i1	188
TR42346|c1_g2_i2	34
TR42350|c1_g2_i2	40
TR42354|c0_g1_i3	40
TR42378|c0_g1_i1	50
TR42380|c0_g1_i2	94
TR42381|c1_g1_i3	50
TR42405|c2_g2_i4	46
TR42429|c0_g2_i1	104
TR42435|c1_g2_i20	34
TR42506|c1_g1_i5	20
TR42507|c0_g4_i3	30
TR42510|c0_g4_i2	26
TR42536|c0_g5_i1	14
TR42536|c0_g9_i1	20
TR42542|c0_g1_i1	22
TR42556|c1_g4_i1	32
TR42558|c1_g1_i10	46
TR42580|c0_g2_i1	34
TR42580|c0_g3_i3	42
TR42587|c2_g1_i1	16
TR42587|c2_g1_i3	16
TR42587|c2_g3_i2	20
TR42600|c0_g8_i4	32
TR42601|c0_g2_i5	36
TR42620|c0_g1_i3	66
TR42623|c1_g1_i1	24
TR42632|c0_g3_i5	40
TR42675|c1_g7_i2	34
TR42686|c0_g2_i3	96
TR42692|c0_g1_i2	60
TR42699|c0_g1_i1	50
TR42705|c0_g4_i1	26
TR42708|c0_g1_i5	26
TR42713|c0_g1_i3	22
TR42713|c1_g6_i1	24
TR42714|c1_g4_i1	24
TR42726|c1_g2_i2	58
TR42726|c1_g5_i1	54
TR42726|c1_g5_i2	20
TR42738|c1_g10_i1	30
TR42742|c1_g5_i1	14
TR42744|c0_g2_i2	34
TR42776|c0_g6_i4	14
TR42794|c0_g3_i4	28
TR42826|c1_g5_i2	32
TR42861|c0_g3_i1	22
TR42876|c0_g3_i2	420
TR42904|c0_g5_i1	66
TR42907|c0_g1_i2	38
TR42910|c0_g1_i1	46
TR42920|c0_g5_i1	22
TR42950|c0_g5_i8	22
TR42969|c0_g4_i1	56
TR42993|c0_g5_i4	134
TR43005|c2_g8_i2	20
TR43006|c1_g2_i2	80
TR43007|c0_g2_i5	74
TR43007|c0_g2_i8	66
TR43013|c0_g3_i1	14
TR43037|c0_g2_i1	14
TR43054|c0_g1_i2	82
TR43061|c0_g1_i2	16
TR43061|c0_g1_i5	28
TR43076|c0_g5_i1	16
TR43077|c0_g4_i1	22
TR43088|c1_g1_i1	98
TR43092|c0_g1_i3	170
TR43159|c0_g1_i4	38
TR43159|c0_g1_i6	30
TR43168|c1_g6_i5	28
TR43176|c0_g3_i1	12
TR43200|c0_g1_i3	88
TR43210|c0_g6_i1	16
TR43210|c0_g8_i4	14
TR43217|c0_g1_i1	518
TR43217|c0_g1_i2	206
TR43224|c1_g2_i1	18
TR43242|c0_g3_i1	18
TR43243|c1_g1_i1	40
TR43249|c0_g1_i1	38
TR43252|c0_g2_i9	38
TR43254|c0_g1_i5	36
TR43287|c0_g1_i1	22
TR43313|c0_g1_i3	26
TR43320|c0_g5_i1	12
TR43326|c0_g7_i1	20
TR43327|c0_g2_i2	42
TR43330|c1_g2_i7	16
TR43351|c0_g1_i2	140
TR43370|c0_g1_i1	16
TR43419|c1_g3_i1	14
TR43427|c0_g6_i1	48
TR43429|c0_g1_i2	30
TR43434|c1_g1_i5	22
TR43465|c1_g1_i1	32
TR43589|c0_g1_i2	20
TR43591|c0_g5_i1	30
TR43595|c1_g7_i1	22
TR43600|c0_g9_i1	16
TR43650|c0_g4_i4	54
TR43656|c1_g1_i1	12
TR43677|c0_g10_i1	30
TR43677|c0_g11_i1	20
TR43680|c2_g1_i5	44
TR43680|c2_g1_i7	92
TR43701|c1_g1_i1	10
TR43704|c3_g4_i1	40
TR43728|c0_g4_i1	46
TR43745|c1_g3_i2	14
TR43747|c0_g1_i3	66
TR43750|c1_g2_i3	38
TR43787|c0_g2_i2	104
TR43787|c0_g2_i3	30
TR43788|c1_g1_i5	40
TR43798|c0_g5_i2	70
TR43816|c0_g5_i2	90
TR43817|c2_g3_i1	10
TR43825|c0_g2_i2	76
TR43832|c1_g2_i1	36
TR43841|c0_g1_i3	12
TR43851|c1_g4_i3	26
TR43869|c0_g1_i1	16
TR43881|c2_g2_i2	42
TR43894|c2_g2_i2	34
TR43907|c0_g1_i1	42
TR43908|c1_g1_i3	34
TR43961|c1_g3_i1	26
TR43961|c1_g4_i3	46
TR43961|c1_g5_i1	168
TR43963|c0_g2_i1	46
TR43964|c0_g2_i1	14
TR43973|c2_g4_i1	32
TR43988|c0_g4_i1	24
TR44033|c0_g2_i3	66
TR44033|c0_g6_i6	50
TR44043|c2_g9_i7	96
TR44046|c0_g1_i3	130
TR44053|c1_g4_i1	16
TR44058|c2_g2_i2	46
TR44062|c1_g2_i1	18
TR44065|c1_g4_i2	22
TR44074|c0_g4_i2	24
TR44076|c0_g2_i1	34
TR44108|c1_g1_i2	34
TR44110|c0_g1_i2	94
TR44114|c0_g1_i6	64
TR44123|c1_g1_i2	54
TR44131|c4_g1_i1	16
TR44139|c2_g2_i1	44
TR44139|c2_g6_i1	14
TR44156|c1_g6_i7	14
TR44160|c2_g3_i3	12
TR44163|c0_g3_i1	34
TR44189|c1_g2_i4	54
TR44199|c3_g4_i2	54
TR44204|c1_g3_i1	16
TR44206|c0_g2_i1	36
TR44227|c0_g1_i3	24
TR44248|c4_g3_i1	26
TR44255|c0_g5_i1	26
TR44259|c2_g3_i2	82
TR44263|c1_g3_i1	44
TR44267|c0_g7_i1	84
TR44274|c2_g1_i5	36
TR44274|c2_g5_i1	18
TR44289|c0_g1_i3	30
TR44298|c1_g6_i1	12
TR44300|c2_g2_i1	22
TR44301|c1_g3_i1	12
TR44309|c1_g2_i3	46
TR44309|c1_g3_i3	22
TR44317|c0_g1_i1	26
TR44355|c2_g1_i4	40
TR44360|c0_g2_i3	130
TR44364|c1_g1_i1	14
TR44370|c0_g1_i1	22
TR44379|c0_g4_i4	18
TR44381|c3_g1_i1	18
TR44382|c0_g2_i2	34
TR44402|c0_g2_i6	34
TR44415|c0_g1_i5	60
TR44420|c2_g9_i2	22
TR44434|c2_g4_i1	16
TR44447|c2_g2_i1	46
TR44555|c2_g12_i1	12
TR44556|c2_g1_i2	50
TR44562|c2_g1_i5	38
TR44571|c5_g4_i1	32
TR44595|c0_g1_i1	16
TR44604|c3_g3_i3	24
TR44609|c8_g4_i1	36
TR44609|c8_g5_i6	18
TR44618|c0_g2_i2	18
TR44628|c1_g1_i1	108
TR44631|c0_g2_i3	78
TR44641|c2_g9_i1	48
TR44670|c1_g3_i1	36
TR44720|c0_g4_i3	20
TR44736|c0_g2_i1	32
TR44745|c2_g1_i1	24
TR44750|c1_g2_i2	14
TR44761|c0_g1_i2	30
TR44779|c2_g3_i1	28
TR44786|c2_g3_i3	38
TR44791|c1_g3_i3	38
TR44799|c1_g1_i2	34
TR44808|c4_g7_i1	22
TR44811|c3_g3_i2	26
TR44824|c2_g2_i2	22
TR44841|c1_g2_i1	40
TR44855|c1_g5_i2	20
TR44855|c2_g6_i1	16
TR44855|c3_g6_i1	18
TR44876|c0_g3_i3	70
TR44878|c3_g2_i4	24
TR44878|c4_g2_i1	18
TR7005|c0_g1_i1	16
TR7281|c0_g1_i3	42
TR7338|c0_g1_i3	26
TR7470|c0_g1_i1	1032
TR7501|c0_g1_i1	22
TR7503|c1_g3_i1	90
TR7514|c0_g1_i2	62
TR7629|c0_g2_i1	20
TR7663|c0_g5_i2	22
TR7676|c1_g2_i1	42
TR7731|c5_g2_i1	18
TR7737|c0_g1_i2	122
TR7776|c0_g2_i1	20
TR7804|c0_g1_i2	28
TR7817|c0_g5_i1	56
TR7817|c0_g5_i2	42
TR7824|c0_g1_i3	90
TR7829|c0_g3_i1	38
TR7837|c0_g2_i1	74
TR7857|c0_g4_i1	16
TR7877|c0_g1_i5	78
TR7879|c0_g5_i1	22
TR7928|c0_g6_i1	18
TR7936|c0_g1_i3	204
TR7946|c0_g1_i5	20
TR8039|c0_g2_i2	30
TR8068|c1_g4_i4	94
TR8132|c0_g7_i1	14
TR8132|c0_g7_i2	18
TR8149|c0_g3_i4	34
TR8158|c0_g3_i5	28
TR8158|c0_g4_i1	24
TR8173|c0_g2_i2	24
TR8174|c3_g1_i1	52
TR8187|c0_g12_i1	14
TR8189|c0_g5_i3	40
TR8217|c0_g7_i1	18
TR8217|c0_g7_i2	16
TR8219|c0_g1_i2	26
TR8219|c0_g5_i1	14
TR8228|c0_g2_i3	18
TR8229|c5_g3_i1	26
TR8238|c0_g10_i1	48
TR8262|c1_g3_i1	26
TR8270|c1_g1_i1	16
TR8297|c2_g2_i2	56
TR8310|c0_g5_i2	30
TR9065|c0_g1_i1	26
TR9432|c0_g1_i1	16
TR9580|c0_g1_i1	16
TR9940|c0_g1_i1	10
TR10488|c0_g1_i1	16
TR10529|c0_g1_i1	26
TR10822|c0_g1_i1	56
TR10829|c0_g1_i1	14
TR10894|c0_g1_i1	24
TR1091|c0_g1_i1	14
TR1092|c0_g1_i2	14
TR11257|c0_g2_i2	56
TR1127|c0_g2_i1	32
TR11312|c0_g1_i1	38
TR11360|c0_g2_i1	40
TR11476|c0_g1_i1	50
TR11500|c0_g1_i1	44
TR11599|c1_g1_i1	36
TR11807|c0_g2_i1	14
TR11950|c0_g1_i2	54
TR12034|c0_g1_i1	14
TR12258|c0_g1_i1	7760
TR1233|c0_g1_i1	20
TR12379|c0_g2_i1	12
TR12395|c0_g1_i1	184
TR12415|c0_g1_i1	22
TR1274|c0_g1_i1	18
TR12982|c0_g2_i1	40
TR1303|c0_g1_i1	12
TR13124|c0_g1_i1	14
TR13129|c0_g1_i4	20
TR1317|c0_g1_i2	20
TR13307|c0_g1_i1	16
TR13461|c0_g1_i1	18
TR13562|c0_g1_i1	12
TR13632|c0_g1_i1	18
TR1397|c0_g1_i2	144
TR13978|c0_g1_i1	14
TR1401|c0_g1_i1	52
TR14045|c0_g1_i1	20
TR1409|c1_g1_i1	12
TR14139|c0_g1_i1	26
TR14190|c1_g1_i1	28
TR14253|c0_g1_i1	24
TR14388|c0_g2_i1	20
TR14391|c0_g2_i1	28
TR14454|c0_g1_i1	24
TR14484|c0_g1_i1	30
TR14539|c0_g1_i1	66
TR14539|c0_g2_i1	38
TR14791|c0_g1_i1	308
TR14791|c0_g2_i1	208
TR14812|c1_g1_i1	14
TR14862|c0_g1_i1	22
TR15041|c0_g1_i1	20
TR1517|c0_g1_i1	18
TR15304|c0_g1_i1	24
TR15380|c0_g1_i2	14
TR15395|c0_g2_i1	18
TR15403|c0_g2_i1	32
TR15446|c0_g2_i1	30
TR15494|c0_g1_i1	22
TR15494|c0_g1_i2	24
TR15593|c0_g2_i1	32
TR15667|c0_g1_i1	54
TR15731|c0_g1_i1	46
TR15806|c0_g1_i1	16
TR15819|c0_g1_i1	58
TR15970|c0_g1_i1	110
TR16113|c0_g1_i1	12
TR16128|c0_g2_i1	36
TR16173|c0_g1_i1	22
TR16219|c1_g1_i1	30
TR16229|c0_g1_i1	28
TR16301|c0_g1_i1	22
TR16396|c0_g1_i1	60
TR16427|c0_g1_i1	28
TR16445|c0_g1_i1	42
TR16501|c0_g1_i1	24
TR1653|c0_g2_i3	10
TR16575|c0_g1_i1	18
TR16741|c0_g1_i1	108
TR16771|c0_g1_i1	18
TR16925|c0_g1_i1	88
TR16925|c0_g1_i2	84
TR17115|c0_g2_i1	14
TR1719|c0_g1_i2	14
TR17231|c0_g1_i1	18
TR17234|c0_g1_i1	16
TR17241|c0_g1_i1	26
TR17272|c0_g2_i1	18
TR17281|c0_g1_i4	14
TR17334|c0_g1_i1	20
TR17398|c0_g1_i2	44
TR17457|c0_g1_i1	14
TR17468|c0_g1_i2	12
TR17521|c0_g1_i1	72
TR17605|c0_g1_i1	24
TR17636|c0_g1_i3	58
TR17773|c1_g1_i2	90
TR17796|c0_g1_i1	56
TR17819|c0_g1_i1	16
TR17833|c0_g2_i1	180
TR17899|c0_g1_i1	48
TR17916|c0_g1_i1	16
TR17991|c1_g1_i1	12
TR18004|c0_g1_i1	18
TR18121|c0_g1_i1	14
TR18144|c0_g1_i1	38
TR1819|c0_g1_i1	18
TR18269|c0_g1_i1	22
TR18294|c0_g1_i1	32
TR18299|c0_g1_i1	44
TR18313|c0_g1_i1	26
TR18323|c0_g1_i1	14
TR18346|c0_g1_i1	18
TR18452|c0_g1_i1	34
TR1855|c0_g1_i1	24
TR18553|c0_g1_i2	14
TR18618|c0_g1_i1	28
TR18643|c0_g1_i1	50
TR18643|c0_g1_i2	18
TR18662|c0_g2_i1	20
TR18671|c1_g1_i2	26
TR18671|c2_g1_i2	128
TR18679|c0_g1_i2	44
TR18701|c1_g2_i1	42
TR18703|c0_g1_i1	22
TR18732|c0_g2_i1	18
TR18756|c0_g1_i1	24
TR18756|c0_g1_i3	84
TR18844|c0_g1_i2	20
TR19042|c0_g1_i1	52
TR19072|c0_g1_i1	14
TR19082|c0_g1_i1	50
TR19106|c0_g2_i3	30
TR19191|c0_g1_i1	60
TR19315|c0_g2_i1	20
TR19350|c0_g2_i1	28
TR19367|c0_g1_i2	28
TR19388|c0_g1_i1	88
TR19425|c0_g2_i1	26
TR19467|c0_g1_i1	26
TR19602|c0_g1_i1	10
TR19693|c0_g1_i1	268
TR19693|c0_g3_i1	186
TR19735|c0_g1_i1	30
TR1978|c0_g2_i1	22
TR1981|c0_g1_i2	12
TR19917|c0_g1_i1	18
TR19938|c0_g1_i2	16
TR19975|c0_g1_i1	28
TR19979|c0_g2_i1	22
TR20073|c0_g1_i1	12
TR20084|c0_g1_i1	14
TR20093|c0_g3_i1	10
TR20108|c0_g1_i2	38
TR20222|c0_g1_i1	44
TR20276|c0_g1_i4	696
TR20321|c0_g1_i1	14
TR20396|c0_g1_i2	24
TR20405|c0_g2_i1	20
TR20538|c0_g1_i1	12
TR20553|c0_g1_i2	16
TR20553|c0_g1_i3	50
TR20558|c0_g1_i1	20
TR2063|c0_g1_i1	64
TR20638|c0_g1_i1	14
TR20706|c0_g1_i1	18
TR20710|c1_g1_i1	30
TR20788|c0_g1_i2	74
TR20790|c0_g1_i2	36
TR20815|c0_g1_i2	14
TR20819|c0_g1_i1	16
TR2084|c0_g3_i1	18
TR20840|c0_g1_i1	24
TR20860|c0_g3_i1	24
TR20880|c0_g1_i1	42
TR21000|c0_g2_i1	22
TR21001|c0_g1_i5	92
TR21120|c0_g1_i1	70
TR21131|c0_g1_i1	36
TR21163|c0_g1_i1	14
TR21206|c1_g1_i1	16
TR21285|c1_g2_i1	20
TR2130|c0_g1_i1	64
TR2130|c0_g1_i2	44
TR21317|c0_g1_i2	26
TR21345|c0_g1_i2	18
TR21458|c0_g1_i1	22
TR21474|c0_g1_i2	16
TR21477|c0_g1_i3	78
TR21496|c0_g1_i1	106
TR21542|c0_g1_i1	16
TR21613|c1_g1_i1	36
TR21615|c0_g2_i1	14
TR2162|c0_g1_i2	42
TR21652|c0_g1_i1	194
TR21664|c0_g1_i1	40
TR2168|c0_g1_i2	24
TR21684|c0_g1_i1	22
TR21703|c0_g1_i1	18
TR2173|c0_g1_i2	34
TR2174|c1_g1_i2	44
TR2181|c0_g1_i1	86
TR21817|c0_g1_i1	36
TR21820|c0_g1_i2	84
TR21859|c0_g1_i1	40
TR2192|c0_g1_i4	18
TR21922|c0_g3_i1	58
TR2195|c0_g2_i1	20
TR21973|c0_g1_i1	20
TR21988|c0_g1_i1	66
TR2199|c0_g1_i2	132
TR22015|c0_g1_i2	20
TR2204|c0_g1_i4	20
TR22041|c0_g2_i2	40
TR2206|c0_g3_i2	30
TR22067|c0_g1_i3	40
TR22087|c0_g1_i1	20
TR2210|c0_g1_i2	180
TR2211|c0_g1_i1	126
TR2212|c0_g1_i1	18
TR22121|c1_g2_i1	30
TR22126|c0_g1_i1	42
TR22126|c0_g1_i3	44
TR22130|c0_g1_i2	18
TR2214|c3_g11_i1	44
TR22141|c0_g1_i1	98
TR2218|c1_g5_i2	16
TR22229|c0_g1_i2	50
TR2233|c3_g4_i1	50
TR22375|c0_g2_i1	20
TR22396|c0_g3_i1	28
TR22397|c0_g1_i3	22
TR2241|c0_g1_i1	60
TR22428|c0_g1_i1	24
TR22433|c0_g2_i1	18
TR2245|c7_g3_i1	436
TR2247|c0_g1_i2	20
TR2248|c1_g5_i1	28
TR22484|c0_g1_i1	24
TR22544|c0_g1_i3	16
TR2256|c2_g1_i2	20
TR2258|c1_g3_i1	48
TR22585|c0_g1_i1	26
TR22593|c0_g1_i1	12
TR22617|c0_g1_i1	40
TR2263|c1_g1_i13	84
TR22646|c0_g2_i1	16
TR22647|c0_g1_i3	28
TR2267|c0_g1_i1	50
TR2267|c0_g1_i2	106
TR22751|c0_g1_i2	36
TR22765|c1_g1_i1	78
TR22770|c0_g1_i2	30
TR22776|c0_g1_i1	14
TR22831|c0_g1_i2	18
TR22837|c0_g1_i1	24
TR22872|c2_g1_i1	46
TR22953|c0_g1_i1	34
TR2296|c0_g2_i4	40
TR22966|c0_g3_i1	18
TR22967|c0_g1_i2	24
TR22980|c0_g2_i1	26
TR2300|c0_g4_i3	32
TR23017|c0_g1_i1	14
TR23022|c0_g1_i1	22
TR23031|c0_g1_i1	36
TR23031|c0_g1_i2	40
TR23034|c0_g1_i3	60
TR2306|c0_g3_i2	62
TR23073|c0_g1_i1	100
TR23073|c0_g1_i2	170
TR2308|c4_g1_i1	66
TR2308|c4_g1_i7	26
TR23081|c0_g1_i1	100
TR23089|c0_g5_i1	16
TR23155|c0_g2_i1	36
TR2322|c0_g3_i1	34
TR23250|c1_g2_i1	20
TR23267|c0_g1_i2	24
TR23273|c0_g2_i3	30
TR23274|c0_g1_i4	22
TR2330|c0_g1_i4	26
TR23301|c0_g1_i1	44
TR2331|c0_g1_i2	78
TR23323|c0_g1_i1	32
TR23333|c0_g4_i1	34
TR23339|c0_g1_i3	58
TR23339|c0_g3_i1	70
TR23365|c0_g1_i2	26
TR23369|c0_g1_i2	24
TR23420|c0_g2_i1	18
TR23433|c0_g1_i2	30
TR2347|c0_g1_i3	70
TR2351|c0_g2_i1	16
TR23514|c0_g1_i3	24
TR2352|c0_g1_i3	86
TR23520|c0_g2_i1	18
TR23531|c0_g2_i2	42
TR2355|c1_g2_i2	94
TR2355|c1_g2_i6	118
TR23567|c0_g1_i1	56
TR2357|c0_g1_i3	56
TR23603|c0_g1_i4	36
TR2362|c0_g3_i1	34
TR23648|c0_g1_i1	40
TR23652|c0_g1_i1	60
TR23694|c0_g1_i3	30
TR2370|c0_g3_i2	62
TR23706|c1_g1_i4	54
TR2371|c0_g2_i1	154
TR23710|c0_g1_i2	182
TR23713|c1_g2_i2	34
TR2372|c0_g1_i3	102
TR23749|c0_g2_i1	28
TR2375|c0_g1_i4	68
TR23753|c0_g1_i3	30
TR23766|c0_g3_i1	48
TR23766|c0_g3_i2	18
TR2377|c0_g1_i2	120
TR23777|c0_g1_i1	38
TR2378|c0_g1_i4	28
TR23790|c0_g1_i1	26
TR23804|c0_g1_i1	38
TR23827|c0_g1_i1	14
TR23837|c0_g1_i1	38
TR23840|c0_g1_i1	26
TR2386|c0_g1_i1	28
TR2386|c1_g2_i2	32
TR23862|c0_g1_i1	40
TR23912|c0_g1_i2	78
TR23938|c0_g1_i1	200
TR23946|c0_g1_i1	22
TR23958|c0_g1_i1	378
TR23999|c0_g1_i7	24
TR24013|c0_g1_i1	16
TR2402|c1_g1_i6	48
TR24049|c0_g1_i1	28
TR2409|c0_g1_i1	18
TR24090|c0_g2_i3	32
TR24092|c0_g1_i3	68
TR24147|c0_g1_i1	90
TR24147|c0_g1_i3	70
TR2415|c3_g1_i2	14
TR24168|c0_g1_i1	140
TR24168|c0_g1_i2	180
TR2417|c0_g1_i1	248
TR2417|c0_g1_i5	984
TR24172|c0_g1_i1	52
TR2418|c0_g1_i1	36
TR2418|c0_g2_i3	28
TR24189|c1_g1_i1	64
TR2422|c2_g1_i2	102
TR2422|c2_g1_i7	52
TR24251|c1_g1_i2	36
TR24273|c0_g2_i1	154
TR24273|c0_g2_i2	68
TR24295|c0_g1_i2	44
TR24298|c0_g2_i1	20
TR2432|c1_g3_i4	32
TR24347|c0_g1_i2	40
TR24347|c0_g1_i4	70
TR24347|c0_g1_i5	36
TR24387|c0_g1_i2	32
TR24393|c0_g1_i3	38
TR24427|c0_g1_i1	32
TR24437|c0_g1_i3	30
TR24539|c0_g2_i2	192
TR24539|c0_g2_i3	188
TR24548|c0_g1_i1	96
TR24551|c0_g1_i2	12
TR2460|c0_g1_i1	34
TR2461|c1_g6_i1	14
TR24639|c0_g1_i2	160
TR2466|c0_g1_i2	56
TR2467|c2_g1_i5	70
TR24671|c0_g3_i3	12
TR24675|c0_g1_i1	50
TR24710|c0_g1_i3	16
TR24797|c0_g2_i1	28
TR24805|c0_g1_i1	16
TR24806|c0_g1_i1	22
TR24818|c0_g1_i4	42
TR24825|c0_g1_i1	38
TR24843|c0_g1_i2	26
TR2485|c2_g1_i5	28
TR2487|c0_g1_i4	50
TR24896|c0_g2_i1	46
TR24907|c1_g3_i1	36
TR24951|c0_g1_i1	70
TR24983|c0_g1_i3	18
TR25008|c0_g1_i3	46
TR25008|c0_g1_i5	58
TR2503|c0_g1_i1	36
TR25032|c0_g1_i2	28
TR25057|c0_g1_i2	22
TR25057|c0_g2_i1	22
TR25069|c0_g2_i1	30
TR2508|c2_g1_i1	34
TR25135|c0_g4_i1	58
TR25148|c0_g1_i2	76
TR2515|c0_g3_i1	30
TR25185|c0_g1_i1	108
TR2519|c0_g2_i1	66
TR25214|c0_g1_i3	108
TR25234|c0_g1_i1	26
TR25278|c0_g1_i9	14
TR25280|c1_g1_i6	38
TR25308|c0_g1_i1	46
TR25458|c1_g1_i1	26
TR25483|c0_g1_i1	22
TR25532|c0_g1_i1	24
TR25555|c0_g1_i2	32
TR25582|c0_g1_i1	40
TR25666|c1_g2_i10	56
TR25679|c0_g3_i2	46
TR25687|c0_g1_i2	50
TR2569|c0_g1_i3	34
TR2569|c0_g1_i6	12
TR25697|c0_g1_i1	30
TR2570|c0_g1_i11	14
TR25701|c3_g2_i4	50
TR25701|c3_g2_i8	82
TR25701|c3_g2_i9	54
TR25711|c0_g1_i1	40
TR25712|c0_g2_i1	64
TR25772|c0_g1_i1	44
TR25773|c0_g2_i1	24
TR25787|c0_g1_i1	32
TR2580|c0_g3_i8	60
TR25808|c0_g1_i1	46
TR25828|c0_g2_i2	52
TR25828|c0_g2_i3	48
TR25828|c0_g2_i4	40
TR25838|c0_g1_i2	60
TR25862|c0_g1_i1	18
TR25882|c0_g2_i2	12
TR25899|c0_g4_i1	204
TR25901|c0_g1_i1	204
TR25901|c0_g1_i2	352
TR25901|c0_g1_i3	456
TR25915|c0_g1_i1	58
TR25919|c0_g1_i1	32
TR25927|c0_g2_i2	42
TR25937|c0_g1_i1	40
TR25937|c0_g1_i2	46
TR25943|c0_g1_i1	24
TR25979|c0_g2_i1	16
TR25988|c0_g3_i1	54
TR25997|c0_g2_i1	104
TR2600|c0_g2_i1	26
TR26024|c0_g1_i5	114
TR26037|c0_g1_i3	32
TR26086|c0_g1_i4	154
TR26107|c0_g1_i1	16
TR26117|c0_g1_i6	28
TR26130|c2_g1_i1	22
TR26140|c0_g1_i5	84
TR2616|c0_g1_i3	110
TR26173|c0_g1_i2	62
TR26203|c0_g1_i5	60
TR26237|c0_g1_i6	42
TR26259|c1_g1_i1	74
TR26260|c0_g1_i1	64
TR26260|c0_g1_i2	18
TR26276|c0_g2_i3	144
TR26305|c0_g1_i3	86
TR26306|c0_g1_i1	42
TR26319|c0_g1_i1	24
TR26323|c0_g1_i1	42
TR26330|c1_g7_i3	30
TR26334|c0_g1_i1	34
TR26342|c0_g1_i4	12
TR26352|c0_g1_i3	38
TR26360|c0_g1_i2	34
TR2637|c0_g1_i3	28
TR26373|c0_g1_i3	58
TR26373|c0_g1_i5	50
TR26375|c0_g1_i1	54
TR26375|c0_g1_i2	110
TR26375|c0_g1_i3	58
TR26375|c0_g1_i4	36
TR26393|c0_g1_i4	40
TR26409|c0_g1_i5	14
TR2642|c0_g1_i1	52
TR26431|c0_g1_i2	38
TR26438|c0_g1_i1	22
TR26448|c0_g1_i2	18
TR26448|c0_g3_i1	20
TR26477|c0_g2_i1	22
TR26477|c0_g2_i3	40
TR26477|c0_g2_i4	68
TR2650|c1_g1_i1	138
TR2650|c1_g3_i2	52
TR26536|c0_g1_i5	28
TR26538|c0_g1_i1	18
TR26549|c0_g2_i1	58
TR2655|c0_g2_i1	22
TR26575|c0_g2_i1	48
TR26576|c0_g3_i1	14
TR2658|c0_g1_i3	80
TR26582|c0_g1_i1	32
TR26583|c0_g1_i1	24
TR26602|c0_g1_i1	48
TR26611|c1_g1_i3	36
TR2664|c2_g1_i4	14
TR26674|c2_g1_i5	26
TR2668|c0_g1_i6	76
TR26680|c0_g3_i2	36
TR2669|c2_g5_i1	66
TR2669|c2_g6_i1	24
TR26696|c0_g3_i1	78
TR26704|c1_g1_i5	44
TR2672|c0_g2_i1	16
TR26726|c0_g2_i1	14
TR2673|c2_g2_i7	80
TR26742|c0_g1_i2	20
TR26773|c0_g1_i1	22
TR26792|c0_g2_i1	18
TR2680|c0_g1_i2	46
TR26811|c0_g1_i1	20
TR26840|c0_g1_i1	18
TR26846|c0_g1_i4	62
TR2685|c0_g1_i4	128
TR26857|c1_g1_i5	50
TR26867|c0_g5_i1	20
TR26878|c0_g1_i3	158
TR26898|c0_g1_i2	48
TR2691|c1_g2_i2	24
TR26916|c0_g1_i3	56
TR26922|c1_g1_i6	46
TR26924|c0_g1_i2	22
TR2693|c1_g1_i4	24
TR26938|c0_g1_i3	36
TR2694|c2_g2_i6	150
TR26947|c1_g1_i2	18
TR26951|c0_g1_i3	30
TR2697|c0_g1_i1	322
TR26989|c1_g1_i1	48
TR26990|c0_g2_i1	14
TR26997|c0_g2_i1	54
TR2700|c1_g1_i4	72
TR27046|c0_g1_i1	32
TR2707|c0_g1_i1	38
TR27085|c0_g1_i2	32
TR27093|c0_g7_i1	28
TR27118|c0_g3_i1	44
TR27133|c0_g3_i1	34
TR27139|c0_g1_i2	42
TR27147|c0_g1_i1	48
TR2715|c1_g1_i1	28
TR27151|c0_g1_i4	24
TR27156|c0_g1_i1	144
TR27167|c0_g1_i3	14
TR27183|c1_g1_i1	18
TR27183|c1_g1_i3	24
TR27201|c0_g2_i1	52
TR27201|c1_g1_i2	30
TR27209|c0_g1_i8	28
TR27224|c0_g1_i2	136
TR27227|c0_g9_i1	24
TR27240|c1_g1_i2	34
TR27253|c0_g3_i3	82
TR27258|c0_g2_i4	32
TR27258|c0_g2_i5	60
TR27268|c0_g2_i1	12
TR27275|c0_g1_i1	106
TR2732|c2_g5_i1	72
TR27320|c0_g1_i1	34
TR2734|c0_g1_i4	14
TR27362|c0_g1_i1	32
TR27376|c0_g1_i6	66
TR27378|c0_g1_i1	32
TR2738|c0_g1_i1	168
TR27381|c0_g2_i1	52
TR27393|c0_g1_i2	48
TR27410|c0_g2_i1	24
TR27426|c0_g1_i6	44
TR2744|c0_g3_i7	38
TR2745|c0_g2_i3	58
TR2745|c0_g5_i1	16
TR27462|c0_g2_i1	32
TR27469|c0_g1_i1	30
TR27469|c1_g1_i1	30
TR27479|c0_g3_i1	26
TR27501|c1_g1_i1	20
TR27522|c1_g1_i3	92
TR27529|c1_g1_i1	48
TR27530|c1_g7_i3	28
TR27543|c0_g1_i4	78
TR27568|c1_g1_i1	118
TR27581|c0_g1_i3	32
TR27593|c0_g2_i2	82
TR27598|c0_g2_i1	36
TR2760|c1_g1_i1	48
TR27601|c0_g1_i1	50
TR27608|c0_g1_i1	48
TR27635|c1_g1_i2	80
TR27640|c0_g2_i2	22
TR27700|c0_g2_i2	46
TR27730|c0_g1_i1	24
TR2777|c0_g1_i1	162
TR27778|c0_g1_i1	138
TR27806|c0_g1_i10	78
TR27821|c0_g1_i1	64
TR27823|c0_g2_i3	118
TR27829|c0_g1_i1	12
TR27829|c0_g1_i3	32
TR27829|c0_g1_i4	50
TR2783|c0_g2_i1	40
TR2785|c0_g2_i2	34
TR2785|c0_g2_i3	18
TR27851|c0_g1_i1	80
TR27851|c0_g1_i4	118
TR27861|c0_g1_i2	294
TR27880|c0_g1_i3	44
TR27895|c0_g1_i4	32
TR27906|c0_g10_i1	50
TR27907|c0_g1_i1	28
TR27915|c0_g1_i1	68
TR2792|c1_g5_i1	18
TR27924|c2_g1_i3	38
TR27948|c0_g1_i1	10
TR27961|c0_g1_i1	98
TR27978|c0_g1_i5	48
TR2800|c0_g1_i1	22
TR28008|c0_g1_i1	24
TR2801|c1_g1_i11	128
TR2801|c1_g1_i2	132
TR2802|c0_g1_i4	28
TR28047|c0_g1_i1	30
TR28055|c0_g1_i1	34
TR28085|c0_g1_i1	26
TR28091|c0_g2_i2	36
TR28108|c0_g3_i1	34
TR28110|c0_g1_i3	48
TR28113|c0_g2_i1	406
TR28121|c0_g1_i2	28
TR28126|c1_g1_i1	38
TR28147|c0_g1_i1	34
TR28164|c1_g1_i1	78
TR28168|c0_g2_i2	44
TR2818|c3_g2_i12	142
TR2818|c3_g2_i9	52
TR28187|c1_g1_i1	54
TR2819|c0_g1_i7	86
TR28202|c0_g2_i2	32
TR28255|c0_g3_i2	44
TR28270|c0_g1_i1	20
TR28274|c0_g1_i1	226
TR28291|c0_g4_i1	18
TR28337|c0_g1_i1	52
TR28342|c0_g1_i1	20
TR2835|c0_g1_i2	112
TR28350|c0_g2_i1	32
TR28358|c0_g2_i1	60
TR28363|c1_g1_i4	54
TR28374|c0_g1_i2	14
TR28374|c0_g1_i3	110
TR28384|c0_g1_i3	112
TR28384|c0_g1_i4	34
TR28385|c0_g1_i3	16
TR2839|c0_g1_i6	40
TR28397|c0_g3_i2	22
TR28404|c0_g3_i1	20
TR28420|c0_g2_i5	112
TR28421|c0_g1_i3	28
TR28424|c1_g1_i1	52
TR28428|c0_g1_i4	42
TR28439|c0_g1_i2	18
TR2844|c2_g1_i3	32
TR2844|c2_g1_i6	32
TR28468|c0_g2_i1	12
TR28468|c0_g5_i1	30
TR2847|c1_g4_i1	12
TR2847|c1_g5_i6	38
TR2847|c1_g5_i7	102
TR2849|c1_g3_i1	34
TR2850|c1_g2_i1	40
TR2851|c0_g2_i1	64
TR2853|c0_g1_i3	30
TR28535|c1_g1_i1	98
TR28541|c0_g1_i2	28
TR28552|c0_g1_i4	102
TR2856|c0_g2_i3	44
TR28563|c0_g1_i4	34
TR28596|c0_g1_i3	50
TR2860|c0_g1_i2	80
TR28600|c0_g4_i1	14
TR28606|c1_g1_i1	16
TR2861|c2_g11_i2	32
TR28657|c0_g1_i1	74
TR28661|c0_g1_i2	28
TR28665|c0_g2_i1	52
TR28673|c1_g1_i1	36
TR28677|c1_g1_i1	256
TR28694|c0_g2_i1	18
TR28710|c0_g1_i3	64
TR28712|c0_g1_i1	52
TR28740|c0_g2_i4	54
TR28741|c0_g1_i2	42
TR28745|c0_g1_i1	74
TR2877|c0_g1_i6	24
TR28796|c0_g2_i1	22
TR28802|c2_g2_i1	34
TR28814|c0_g1_i1	20
TR28823|c1_g1_i10	54
TR28852|c0_g1_i2	188
TR2886|c0_g1_i1	146
TR2887|c0_g1_i1	92
TR28875|c0_g1_i4	28
TR28880|c0_g3_i2	32
TR28880|c0_g5_i1	56
TR28910|c0_g2_i1	146
TR2892|c0_g1_i4	72
TR28928|c4_g10_i1	42
TR28929|c1_g4_i1	118
TR2893|c1_g3_i1	20
TR2893|c1_g3_i4	20
TR28932|c0_g3_i1	24
TR28952|c0_g1_i1	106
TR28964|c0_g1_i3	34
TR28967|c0_g1_i1	80
TR28980|c0_g1_i2	36
TR28982|c0_g2_i2	42
TR2899|c3_g1_i2	16
TR2899|c3_g2_i3	26
TR29013|c0_g1_i5	22
TR29021|c0_g2_i2	24
TR29028|c1_g1_i1	30
TR29033|c0_g1_i1	66
TR29033|c0_g2_i2	42
TR29043|c0_g3_i1	24
TR29080|c0_g1_i3	60
TR29080|c0_g1_i4	44
TR29085|c0_g1_i1	18
TR29087|c0_g1_i2	18
TR29097|c0_g5_i1	44
TR29100|c1_g2_i1	20
TR29106|c0_g1_i1	78
TR29113|c0_g1_i2	66
TR29116|c3_g3_i1	122
TR29116|c3_g3_i2	76
TR29143|c0_g2_i6	10
TR29143|c0_g4_i1	20
TR29149|c1_g1_i1	30
TR29149|c3_g4_i3	26
TR29158|c0_g1_i3	112
TR29159|c0_g1_i1	66
TR29174|c0_g1_i1	76
TR29174|c0_g1_i2	24
TR2918|c0_g1_i7	40
TR29180|c1_g1_i1	50
TR29186|c1_g5_i1	20
TR29189|c0_g1_i1	34
TR29209|c0_g1_i3	34
TR29238|c1_g1_i1	336
TR29239|c0_g1_i2	20
TR29258|c0_g1_i4	130
TR29258|c0_g2_i1	218
TR29267|c1_g1_i1	50
TR29302|c1_g1_i3	24
TR29303|c0_g1_i4	62
TR29305|c0_g1_i3	14
TR29306|c1_g2_i3	118
TR29314|c0_g1_i4	68
TR29332|c0_g1_i3	40
TR29334|c0_g3_i4	58
TR29346|c1_g2_i1	20
TR2936|c0_g1_i1	78
TR2936|c2_g1_i6	104
TR2938|c0_g1_i3	42
TR2938|c0_g1_i5	50
TR29389|c0_g1_i2	14
TR29402|c0_g1_i1	168
TR29408|c0_g1_i4	38
TR29410|c0_g2_i2	14
TR29412|c0_g3_i2	20
TR29413|c0_g1_i4	30
TR29419|c0_g1_i2	32
TR29470|c0_g1_i1	36
TR29479|c0_g2_i5	100
TR29504|c0_g2_i5	76
[truncated: 13,100 more rows]

## Sheet: OB_P1_vs_F1_Differential
Transcript ID	baseMeanA( F1 )	baseMeanB( OB_P1 )	log2FoldChange( OB_P1 Vs. F1 )	pval	padj	Significant	Hit Description	Hit Organism	Family	Gene Ontology (Biological Process)	Gene Ontology (Molecular Function)	Gene Ontology (Cellular Component)	Pathway
TR33439|c0_g5_i2	43.5623	4069.57	6.54565	2.85169e-13	7.50562e-09	Yes	NA	NA	NA	NA	NA	NA	NA
TR35271|c1_g2_i4	28.3155	2339.64	6.36855	1.45682e-13	7.68997e-09	Yes	SMLII	Salvia miltiorrhiza	NA	NA	NA	NA	NA
TR35271|c1_g2_i3	37.028	1392.03	5.23243	1.02728e-10	1.08502e-06	Yes	LEC2_CLALURecName: Full=Agglutinin-2; AltName: Full=Agglutinin II; AltName: Full=ClAII; AltName: Full=LecClAII; Flags: Precursor	Cladrastis kentukea	NA	NA	NA	NA	NA
TR6520|c0_g1_i1	272.264	7961.01	4.86987	7.16691e-08	0.000290501	Yes	SMLII	Salvia miltiorrhiza	NA	NA	NA	NA	NA
TR33439|c0_g5_i10	65.3435	1568.33	4.58504	3.69575e-09	3.24804e-05	Yes	PREDICTED: chlorophyll a-b binding protein of LHCII type 1-like	Glycine max	NA	response to light stimulus[GO:0009416] ; protein-chromophore linkage[GO:0018298] ; photosynthesis, light harvesting in photosystem I[GO:0009768]	chlorophyll binding[GO:0016168] ; pigment binding[GO:0031409]	integral component of membrane[GO:0016021] ; chloroplast envelope[GO:0009941] ; chloroplast thylakoid membrane[GO:0009535] ; photosystem II[GO:0009523] ; plastoglobule[GO:0010287]	NA
TR26216|c0_g1_i1	15.2468	350.762	4.52391	5.07942e-07	0.000786967	Yes	NA	NA	NA	NA	NA	NA	NA
TR24593|c0_g1_i8	222.168	4273.42	4.26567	1.16183e-07	0.000381865	Yes	PREDICTED: chlorophyll a-b binding protein, chloroplastic-like	Cucumis sativus	NA	photosynthesis, light harvesting[GO:0009765] ; protein-chromophore linkage[GO:0018298]	metal ion binding[GO:0046872] ; chlorophyll binding[GO:0016168]	photosystem II[GO:0009523] ; integral component of membrane[GO:0016021] ; chloroplast[GO:0009507] ; photosystem I[GO:0009522]	NA
TR34181|c0_g7_i1	28.3155	541.753	4.25797	2.67558e-07	0.000641629	Yes	NAC transcription factor 1	Salvia miltiorrhiza	NA	NA	NA	NA	NA
TR30737|c0_g1_i2	43.5623	752.945	4.11139	1.88743e-07	0.000497741	Yes	PREDICTED: chaperone protein dnaJ 6	Sesamum indicum	NA	NA	NA	NA	NA
TR32510|c3_g1_i13	41.3842	699.687	4.07956	2.70609e-07	0.000620602	Yes	PREDICTED: protein diaphanous homolog 1-like	Sesamum indicum	NA	NA	NA	NA	NA
TR43235|c3_g1_i1	372.458	5399.16	3.85759	2.15423e-06	0.0024618	Yes	PREDICTED: probable disease resistance protein At4g27220-like isoform X5	Citrus sinensis	NA	NA	NA	NA	NA
TR37650|c2_g1_i14	115.44	1597.71	3.79079	3.63469e-07	0.000708132	Yes	hypothetical protein B456_006G095700, partial	Gossypium raimondii	NA	NA	NA	NA	NA
TR37831|c2_g2_i1	10.8906	143.243	3.71731	8.78642e-05	0.0328353	Yes	PREDICTED: UDP-glucose 4-epimerase GEPI48	Sesamum indicum	NA	NA	NA	NA	NA
TR32527|c3_g4_i1	76.234	999.029	3.71202	8.50508e-07	0.00117955	Yes	hypothetical protein MIMGU_mgv1a004883mg	Mimulus guttatus	NA	oxidation-reduction process[GO:0055114]	heme binding[GO:0020037] ; oxidoreductase activity, acting on paired donors, with incorporation or reduction of molecular oxygen[GO:0016705] ; monooxygenase activity[GO:0004497] ; iron ion binding[GO:0005506]	NA	NA
TR35271|c1_g3_i4	855.999	10693.6	3.643	6.14985e-05	0.025506	Yes	SMLII	Salvia miltiorrhiza	NA	NA	NA	NA	NA
TR36559|c4_g2_i17	161.181	1983.37	3.6212	1.02104e-06	0.00137755	Yes	PREDICTED: uncharacterized protein LOC104789524	Camelina sativa	NA	NA	NA	NA	NA
TR26216|c0_g4_i1	15.2468	185.481	3.6047	8.49854e-05	0.0319788	Yes	NA	NA	NA	NA	NA	NA	NA
TR25093|c1_g2_i2	39.2061	471.968	3.58954	8.8634e-06	0.00648146	Yes	NA	NA	NA	NA	NA	NA	NA
TR32527|c3_g4_i2	39.2061	468.295	3.57827	9.53722e-06	0.00679029	Yes	cinnamic acid 4-hydroxylase	Lithospermum erythrorhizon	NA	oxidation-reduction process[GO:0055114]	heme binding[GO:0020037] ; oxidoreductase activity, acting on paired donors, with incorporation or reduction of molecular oxygen[GO:0016705] ; monooxygenase activity[GO:0004497] ; iron ion binding[GO:0005506]	integral component of membrane[GO:0016021]	NA
TR26216|c0_g1_i6	74.0559	870.477	3.55512	2.44275e-06	0.00267744	Yes	NA	NA	NA	NA	NA	NA	NA
TR32261|c4_g4_i1	47.9185	560.117	3.54707	6.53023e-06	0.00521124	Yes	NA	NA	NA	NA	NA	NA	NA
TR36559|c4_g2_i10	135.043	1548.13	3.51903	1.69643e-06	0.00208234	Yes	PREDICTED: uncharacterized protein LOC104789524	Camelina sativa	NA	NA	NA	NA	NA
TR35907|c1_g1_i1	219.99	2436.97	3.46958	2.95137e-06	0.00293169	Yes	hypothetical protein MIMGU_mgv11b003533mg	Mimulus guttatus	NA	NA	NA	integral component of membrane[GO:0016021]	NA
TR39520|c1_g4_i1	104.55	1151.45	3.4612	2.75894e-06	0.00279561	Yes	hypothetical protein MIMGU_mgv1a004925mg	Mimulus guttatus	NA	proteolysis[GO:0006508] ; lipid metabolic process[GO:0006629]	aspartic-type endopeptidase activity[GO:0004190]	NA	NA
TR44604|c3_g3_i2	204.743	2220.27	3.43885	3.15296e-06	0.00291077	Yes	PREDICTED: subtilisin-like protease	Sesamum indicum	NA	NA	NA	NA	NA
TR31449|c0_g1_i9	167.715	1792.38	3.41779	3.0414e-06	0.00296518	Yes	menthol dehydrogenase	Mentha canadensis	Lamiaceae	oxidation-reduction process[GO:0055114]	oxidoreductase activity[GO:0016491]	NA	NA
TR3540|c0_g1_i1	117.618	1224.91	3.38049	4.05079e-06	0.00355529	Yes	hypothetical protein MIMGU_mgv1a005882mg	Mimulus guttatus	NA	NA	NA	membrane[GO:0016020]	NA
TR50555|c0_g1_i1	43.5623	451.767	3.37443	2.57199e-05	0.0138127	Yes	NA	NA	NA	NA	NA	NA	NA
TR44022|c0_g2_i1	34.8498	359.944	3.36855	4.74736e-05	0.0215679	Yes	PREDICTED: beta-galactosidase 10	Sesamum indicum	NA	NA	NA	NA	NA
TR43235|c3_g1_i15	167.715	1645.46	3.29441	5.90221e-06	0.00478091	Yes	hypothetical protein CICLE_v10018706mg	Citrus clementina	NA	NA	NA	NA	NA
TR3304|c0_g6_i1	23.9593	235.066	3.29441	0.000160831	0.0495388	Yes	hypothetical protein M569_02083, partial	Genlisea aurea	NA	translation[GO:0006412]	structural constituent of ribosome[GO:0003735]	ribosome[GO:0005840]	NA
TR20078|c0_g1_i1	163.359	1579.35	3.27321	6.61338e-06	0.00519635	Yes	PREDICTED: EG45-like domain containing protein	Sesamum indicum	NA	NA	NA	NA	NA
TR4058|c1_g1_i1	159.002	1537.11	3.2731	6.62358e-06	0.00512768	Yes	PREDICTED: probable carotenoid cleavage dioxygenase 4, chloroplastic	Sesamum indicum	NA	NA	NA	NA	NA
TR39964|c0_g4_i3	43.5623	420.547	3.27112	4.82513e-05	0.0213782	Yes	PREDICTED: nudix hydrolase 8-like isoform X3	Sesamum indicum	NA	NA	NA	NA	NA
TR2796|c0_g1_i5	76.234	705.197	3.20952	2.00479e-05	0.0121083	Yes	DHN	Vaccinium corymbosum	NA	NA	NA	NA	NA
TR43235|c3_g1_i3	376.814	3472.73	3.20414	2.12755e-05	0.0126055	Yes	NA	NA	NA	NA	NA	NA	NA
TR37650|c2_g1_i3	104.55	953.118	3.18847	1.43224e-05	0.00918531	Yes	PREDICTED: protein ROOT HAIR DEFECTIVE 3 homolog 2 isoform X1	Sesamum indicum	NA	NA	NA	NA	NA
TR33197|c0_g1_i8	54.4529	494.005	3.18145	4.73977e-05	0.0217096	Yes	PREDICTED: uncharacterized protein LOC105175007	Sesamum indicum	NA	NA	NA	NA	NA
TR30409|c0_g1_i6	117.618	1061.47	3.17388	1.37633e-05	0.00908575	Yes	PREDICTED: CASP-like protein 1	Sesamum indicum	NA	NA	NA	NA	NA
TR30668|c4_g5_i1	52.2748	468.295	3.16323	5.84249e-05	0.0248063	Yes	NA	NA	NA	NA	NA	NA	NA
TR2417|c0_g1_i2	115.44	1032.08	3.16035	1.51799e-05	0.00953094	Yes	hypothetical protein CICLE_v10008962mg	Citrus clementina	NA	inositol catabolic process[GO:0019310] ; oxidation-reduction process[GO:0055114]	iron ion binding[GO:0005506] ; inositol oxygenase activity[GO:0050113]	cytoplasm[GO:0005737]	map00562:Inositol phosphate metabolism(oxygenase[ec:1.13.99.1]) ; map00053:Ascorbate and aldarate metabolism(oxygenase[ec:1.13.99.1])
TR28550|c2_g3_i11	54.4529	486.659	3.15983	5.40286e-05	0.0233134	Yes	hypothetical protein MIMGU_mgv1a012878mg	Mimulus guttatus	NA	methylation[GO:0032259]	O-methyltransferase activity[GO:0008171]	NA	NA
TR2245|c7_g2_i1	50.0967	444.421	3.14914	7.04601e-05	0.0285639	Yes	hypothetical protein MIMGU_mgv1a011672mg	Mimulus guttatus	NA	carbohydrate metabolic process[GO:0005975] ; chitin catabolic process[GO:0006032] ; cell wall macromolecule catabolic process[GO:0016998]	chitinase activity[GO:0004568] ; chitin binding[GO:0008061]	NA	map00520:Amino sugar and nucleotide sugar metabolism(chitodextrinase[ec:3.2.1.14])
TR33439|c0_g5_i5	494.432	4376.26	3.14585	4.49743e-05	0.0207912	Yes	chlorophyll a/b binding protein	Medicago sativa	NA	photosynthesis, light harvesting[GO:0009765] ; protein-chromophore linkage[GO:0018298]	metal ion binding[GO:0046872] ; chlorophyll binding[GO:0016168]	photosystem II[GO:0009523] ; integral component of membrane[GO:0016021] ; chloroplast[GO:0009507] ; photosystem I[GO:0009522]	NA
TR32261|c4_g3_i3	89.3027	784.164	3.13438	2.44532e-05	0.0133035	Yes	NA	NA	NA	NA	NA	NA	NA
TR2595|c0_g1_i2	104.55	914.552	3.12888	2.04134e-05	0.0122101	Yes	PREDICTED: protein NIM1-INTERACTING 2	Sesamum indicum	NA	NA	NA	NA	NA
TR35232|c0_g2_i4	93.659	793.346	3.08246	3.10678e-05	0.0157507	Yes	PREDICTED: beta-amyrin 28-oxidase-like	Sesamum indicum	NA	NA	NA	NA	NA
TR30276|c0_g2_i3	145.934	1215.73	3.05844	2.27009e-05	0.0131388	Yes	PREDICTED: uncharacterized protein LOC105177434	Sesamum indicum	NA	NA	NA	NA	NA
TR2796|c0_g1_i1	209.099	1726.26	3.04539	2.30485e-05	0.0130262	Yes	putative dehydrin	Helianthus ciliaris	NA	response to stress[GO:0006950] ; response to water[GO:0009415]	NA	NA	NA
TR28550|c2_g3_i5	106.728	875.987	3.03698	3.41805e-05	0.0163759	Yes	hypothetical protein MIMGU_mgv1a012878mg	Mimulus guttatus	NA	methylation[GO:0032259]	O-methyltransferase activity[GO:0008171]	NA	NA
TR34270|c2_g4_i2	100.193	773.145	2.94795	6.20757e-05	0.0255537	Yes	NA	NA	NA	NA	NA	NA	NA
TR29230|c0_g3_i3	82.7684	629.902	2.92798	9.1824e-05	0.0340507	Yes	NA	NA	NA	NA	NA	NA	NA
TR40678|c0_g5_i1	196.03	1480.18	2.91662	4.48215e-05	0.020882	Yes	PREDICTED: RING finger and CHY zinc finger domain-containing protein 1-like isoform X1	Sesamum indicum	NA	NA	NA	NA	NA
TR10876|c0_g1_i1	89.3027	664.795	2.89613	9.81053e-05	0.0351498	Yes	NA	NA	NA	NA	NA	NA	NA
TR33439|c0_g5_i11	507.501	3606.79	2.82923	0.000150456	0.0468915	Yes	PREDICTED: chlorophyll a-b binding protein 21, chloroplastic-like	Sesamum indicum	NA	NA	NA	NA	NA
TR33197|c0_g1_i6	128.509	907.206	2.81956	9.64529e-05	0.0350535	Yes	PREDICTED: uncharacterized protein LOC105175007	Sesamum indicum	NA	NA	NA	NA	NA
TR43235|c3_g1_i4	152.468	1074.32	2.81685	8.48588e-05	0.032171	Yes	NA	NA	NA	NA	NA	NA	NA
TR22442|c0_g1_i1	350.677	2411.26	2.78157	0.000115175	0.0386394	Yes	unnamed protein product	Coffea canephora	NA	NA	NA	NA	NA
TR24593|c0_g1_i6	174.249	1177.16	2.75609	0.000109075	0.0380469	Yes	PREDICTED: chlorophyll a-b binding protein, chloroplastic-like	Cucumis sativus	NA	photosynthesis, light harvesting[GO:0009765] ; protein-chromophore linkage[GO:0018298]	metal ion binding[GO:0046872] ; chlorophyll binding[GO:0016168]	photosystem II[GO:0009523] ; integral component of membrane[GO:0016021] ; chloroplast[GO:0009507] ; photosystem I[GO:0009522]	NA
TR39869|c3_g4_i1	187.318	1204.71	2.68513	0.000153894	0.0476809	Yes	hypothetical protein VITISV_024659	Vitis vinifera	NA	NA	binding[GO:0005488]	NA	NA
TR34090|c0_g4_i5	2097.52	314.033	-2.7397	0.000125488	0.0407999	Yes	Heat shock cognate protein 70-1 isoform 2, partial	Theobroma cacao	NA	NA	ATP binding[GO:0005524]	NA	NA
TR35882|c0_g1_i3	805.903	119.369	-2.75517	0.000144269	0.0460533	Yes	hypothetical protein LR48_Vigan05g047200	Vigna angularis	NA	NA	nucleic acid binding[GO:0003676] ; nucleotide binding[GO:0000166]	NA	NA
TR37065|c3_g2_i3	1698.93	251.594	-2.75546	0.000103384	0.0365459	Yes	PREDICTED: cytochrome P450 CYP72A219-like	Sesamum indicum	NA	NA	NA	NA	NA
TR36187|c0_g5_i1	757.984	104.678	-2.85621	9.53612e-05	0.0348945	Yes	PREDICTED: 20 kDa chaperonin, chloroplastic-like	Sesamum indicum	NA	NA	NA	NA	NA
TR39848|c0_g2_i1	548.885	75.2945	-2.86589	0.000145939	0.0460285	Yes	NA	NA	NA	NA	NA	NA	NA
TR3739|c2_g1_i4	633.832	86.3132	-2.87645	0.000110528	0.0375588	Yes	PREDICTED: 1-aminocyclopropane-1-carboxylate oxidase 5-like	Sesamum indicum	NA	NA	NA	NA	NA
TR42175|c0_g1_i1	651.256	88.1496	-2.8852	0.000101984	0.0362946	Yes	PREDICTED: 5'-3' exoribonuclease 3-like isoform X2	Pyrus x bretschneideri	NA	NA	NA	NA	NA
TR40105|c0_g2_i1	507.501	67.9487	-2.90089	0.000144825	0.0459523	Yes	hypothetical protein MIMGU_mgv1a024409mg	Mimulus guttatus	NA	tryptophan biosynthetic process[GO:0000162]	tryptophan synthase activity[GO:0004834]	NA	map00260:Glycine, serine and threonine metabolism(synthase[ec:4.2.1.20]) ; map01130:Biosynthesis of antibiotics(synthase[ec:4.2.1.20]) ; map00400:Phenylalanine, tyrosine and tryptophan biosynthesis(synthase[ec:4.2.1.20])
TR41929|c2_g1_i2	1733.78	231.393	-2.90551	4.76147e-05	0.0214285	Yes	PREDICTED: transcription factor MYC2	Sesamum indicum	NA	NA	NA	NA	NA
TR31573|c1_g2_i1	1762.1	235.066	-2.90616	4.77294e-05	0.0212916	Yes	NA	NA	NA	NA	NA	NA	NA
TR39837|c4_g3_i2	633.832	82.6403	-2.93918	8.24787e-05	0.0314881	Yes	PREDICTED: cytosolic sulfotransferase 12-like	Sesamum indicum	NA	NA	NA	NA	NA
TR32330|c1_g1_i3	662.147	86.3132	-2.9395	7.70958e-05	0.030081	Yes	PREDICTED: phospholipase A1-IIbeta-like	Sesamum indicum	NA	NA	NA	NA	NA
TR41203|c2_g5_i3	503.145	64.2758	-2.96863	0.000109389	0.0379054	Yes	PREDICTED: ATP-dependent zinc metalloprotease FtsH-like	Brassica oleracea var. oleracea	NA	NA	ATP binding[GO:0005524]	integral component of membrane[GO:0016021]	NA
TR7631|c0_g2_i1	910.452	115.696	-2.97624	4.27007e-05	0.0200808	Yes	NA	NA	NA	NA	NA	NA	NA
TR3151|c0_g4_i1	4584.93	582.155	-2.97743	0.000112103	0.0378499	Yes	unnamed protein product	Coffea canephora	NA	NA	NA	NA	NA
TR36039|c0_g1_i2	1725.07	218.538	-2.9807	3.19093e-05	0.015851	Yes	PREDICTED: GDSL esterase/lipase At5g33370-like	Sesamum indicum	NA	NA	NA	NA	NA
TR43167|c0_g11_i1	422.554	53.2571	-2.98809	0.000146332	0.0458777	Yes	pheophytinase	Pyrus x bretschneideri	NA	NA	NA	NA	NA
TR36865|c0_g2_i1	1234.99	154.262	-3.00105	2.95357e-05	0.0152333	Yes	PREDICTED: chlorophyllase-2, chloroplastic isoform X2	Solanum lycopersicum	NA	NA	NA	NA	NA
TR34568|c2_g1_i2	694.819	86.3132	-3.00898	5.15111e-05	0.0224178	Yes	NA	NA	NA	NA	NA	NA	NA
TR30655|c2_g1_i3	509.679	62.4393	-3.02906	8.14442e-05	0.031295	Yes	NA	NA	NA	NA	NA	NA	NA
TR36690|c0_g1_i5	821.149	99.1683	-3.04969	3.33832e-05	0.016289	Yes	PREDICTED: probable carotenoid cleavage dioxygenase 4, chloroplastic	Sesamum indicum	NA	NA	NA	NA	NA
TR42649|c2_g10_i7	1082.52	130.388	-3.05352	2.44346e-05	0.0133872	Yes	PREDICTED: uncharacterized protein LOC105168700	Sesamum indicum	NA	NA	NA	NA	NA
TR38928|c0_g1_i7	346.32	40.4019	-3.09961	0.000140313	0.0450636	Yes	NA	NA	NA	NA	NA	NA	NA
TR29717|c0_g1_i1	1735.96	202.01	-3.10324	1.65518e-05	0.0102863	Yes	hypothetical protein MIMGU_mgv1a013771mg	Mimulus guttatus	NA	NA	NA	NA	NA
TR21697|c0_g1_i1	505.323	58.7664	-3.10414	5.93691e-05	0.0248306	Yes	unnamed protein product	Coffea canephora	NA	metabolic process[GO:0008152]	GTPase activity[GO:0003924] ; GTP binding[GO:0005525]	NA	NA
TR37723|c0_g4_i3	494.432	56.93	-3.11851	5.85134e-05	0.02465	Yes	PREDICTED: bifunctional L-3-cyanoalanine synthase/cysteine synthase 1, mitochondrial	Sesamum indicum	NA	NA	NA	NA	NA
TR30567|c0_g2_i2	339.786	38.5655	-3.13925	0.000124151	0.0406159	Yes	PREDICTED: uncharacterized protein LOC105955433 isoform X1	Erythranthe guttatus	NA	NA	NA	NA	NA
TR38713|c1_g3_i2	958.371	108.351	-3.14488	1.70771e-05	0.010473	Yes	PREDICTED: 28 kDa ribonucleoprotein, chloroplastic-like	Sesamum indicum	NA	NA	NA	NA	NA
TR42297|c2_g2_i2	651.256	73.458	-3.14823	2.92423e-05	0.0153799	Yes	Os06g0133800, partial	Oryza sativa Japonica Group	NA	NA	NA	NA	NA
TR39049|c0_g14_i9	363.745	40.4019	-3.17043	9.52498e-05	0.0350649	Yes	PREDICTED: xyloglucan endotransglucosylase/hydrolase protein 24-like isoform X1	Sesamum indicum	NA	NA	NA	NA	NA
TR33460|c0_g5_i8	551.063	60.6029	-3.18476	3.39277e-05	0.0163812	Yes	hypothetical protein MIMGU_mgv1a014959mg	Mimulus guttatus	NA	protein folding[GO:0006457] ; protein peptidyl-prolyl isomerization[GO:0000413]	peptidyl-prolyl cis-trans isomerase activity[GO:0003755]	NA	NA
TR37554|c0_g9_i3	300.58	33.0561	-3.18476	0.000131963	0.0426419	Yes	PREDICTED: NAD(P)H-quinone oxidoreductase subunit M, chloroplastic	Sesamum indicum	NA	NA	NA	NA	NA
TR28256|c0_g4_i1	1021.54	112.023	-3.18887	1.26922e-05	0.00846736	Yes	PREDICTED: photosystem II reaction center W protein, chloroplastic-like	Nicotiana sylvestris	NA	NA	NA	NA	NA
TR43167|c0_g9_i3	320.183	34.8926	-3.19791	0.000110269	0.0377141	Yes	PREDICTED: pheophytinase, chloroplastic	Sesamum indicum	NA	NA	NA	NA	NA
TR3641|c0_g1_i5	631.653	67.9487	-3.21662	2.22183e-05	0.0129922	Yes	hypothetical protein MIMGU_mgv1a014011mg	Mimulus guttatus	NA	NA	NA	NA	NA
TR27909|c0_g1_i3	291.867	31.2197	-3.22479	0.00012008	0.0395296	Yes	BnaAnng33460D, partial	Brassica napus	NA	NA	NA	NA	NA
TR40823|c0_g3_i2	363.745	38.5655	-3.23755	7.2352e-05	0.028672	Yes	hypothetical protein SOVF_023890	Spinacia oleracea	NA	NA	NA	integral component of membrane[GO:0016021]	NA
TR35255|c2_g1_i1	400.773	42.2384	-3.24616	5.57642e-05	0.0238946	Yes	PREDICTED: chlorophyll a-b binding protein CP29.1, chloroplastic	Sesamum indicum	NA	NA	NA	NA	NA
TR31943|c1_g2_i2	527.104	55.0935	-3.25813	2.68086e-05	0.0142584	Yes	NA	NA	NA	NA	NA	NA	NA
TR37602|c0_g4_i1	446.514	45.9113	-3.28178	3.65559e-05	0.0173672	Yes	PREDICTED: endoplasmin homolog, partial	Nicotiana tomentosiformis	NA	NA	NA	NA	NA
TR43830|c0_g8_i1	267.908	27.5468	-3.28178	0.00011574	0.0385832	Yes	hypothetical protein MIMGU_mgv1a019845mg	Mimulus guttatus	NA	NA	NA	NA	NA
TR29230|c0_g3_i4	270.086	27.5468	-3.29347	0.00010885	0.0382216	Yes	NA	NA	NA	NA	NA	NA	NA
TR39520|c1_g5_i3	344.142	34.8926	-3.30201	6.26776e-05	0.0256006	Yes	hypothetical protein, partial	Zea mays	NA	proteolysis[GO:0006508]	aspartic-type endopeptidase activity[GO:0004190]	NA	NA
TR36187|c0_g3_i11	352.855	34.8926	-3.33808	5.12447e-05	0.022473	Yes	PREDICTED: 20 kDa chaperonin, chloroplastic-like	Sesamum indicum	NA	NA	NA	NA	NA
TR35296|c0_g8_i4	744.915	73.458	-3.34209	8.92288e-06	0.00643596	Yes	PREDICTED: aquaporin TIP1-1-like	Sesamum indicum	NA	NA	NA	NA	NA
TR30052|c2_g2_i1	784.121	77.1309	-3.3457	8.03232e-06	0.00604212	Yes	PREDICTED: photosystem I reaction center subunit IV B, chloroplastic	Sesamum indicum	NA	NA	NA	NA	NA
TR35227|c1_g1_i1	418.198	40.4019	-3.37169	2.93641e-05	0.015332	Yes	NA	NA	NA	NA	NA	NA	NA
TR29043|c0_g4_i4	522.748	49.5842	-3.39816	1.4382e-05	0.0091381	Yes	hypothetical protein MIMGU_mgv1a015384mg	Mimulus guttatus	NA	NA	NA	NA	NA
TR19435|c0_g1_i1	174.249	16.5281	-3.39816	0.000161004	0.0493037	Yes	hypothetical protein EUGRSUZ_K015082, partial	Eucalyptus grandis	NA	methionine biosynthetic process[GO:0009086] ; methylation[GO:0032259]	zinc ion binding[GO:0008270] ; 5-methyltetrahydropteroyltriglutamate-homocysteine S-methyltransferase activity[GO:0003871]	NA	map00450:Selenocompound metabolism(S-methyltransferase[ec:2.1.1.14]) ; map00270:Cysteine and methionine metabolism(S-methyltransferase[ec:2.1.1.14])
TR8118|c1_g2_i1	3410.93	323.215	-3.3996	7.265e-06	0.00554191	Yes	hypothetical protein MIMGU_mgv1a001909mg	Mimulus guttatus	NA	proteolysis[GO:0006508]	serine-type endopeptidase activity[GO:0004252]	NA	NA
TR37644|c0_g2_i1	254.839	23.8739	-3.41609	7.78986e-05	0.0301696	Yes	hypothetical protein MIMGU_mgv1a007445mg	Mimulus guttatus	NA	glycine catabolic process[GO:0006546] ; methylation[GO:0032259]	aminomethyltransferase activity[GO:0004047] ; transaminase activity[GO:0008483]	NA	map00260:Glycine, serine and threonine metabolism(S-aminomethyldihydrolipoylprotein:(6S)-tetrahydrofolate aminomethyltransferase (ammonia-forming)[ec:2.1.2.10]) ; map00670:One carbon pool by folate(S-aminomethyldihydrolipoylprotein:(6S)-tetrahydrofolate aminomethyltransferase (ammonia-forming)[ec:2.1.2.10])
TR2653|c2_g1_i6	215.633	20.201	-3.41609	0.000109585	0.0377252	Yes	PREDICTED: uncharacterized protein LOC105158286	Sesamum indicum	NA	NA	NA	NA	NA
TR32059|c1_g1_i3	1165.29	108.351	-3.42691	3.13424e-06	0.00294393	Yes	PREDICTED: 50S ribosomal protein L24, chloroplastic	Sesamum indicum	NA	NA	NA	NA	NA
TR28695|c0_g3_i1	416.02	38.5655	-3.43127	2.30474e-05	0.0128876	Yes	NA	NA	NA	NA	NA	NA	NA
TR37231|c1_g2_i2	198.208	18.3645	-3.43203	0.000119666	0.0396411	Yes	putative fructose-bisphosphate aldolase protein	Solanum tuberosum	NA	glycolytic process[GO:0006096]	fructose-bisphosphate aldolase activity[GO:0004332]	NA	map00030:Pentose phosphate pathway(aldolase[ec:4.1.2.13]) ; map01130:Biosynthesis of antibiotics(aldolase[ec:4.1.2.13]) ; map00051:Fructose and mannose metabolism(aldolase[ec:4.1.2.13]) ; map00710:Carbon fixation in photosynthetic organisms(aldolase[ec:4.1.2.13]) ; map00010:Glycolysis / Gluconeogenesis(aldolase[ec:4.1.2.13]) ; map00680:Methane metabolism(aldolase[ec:4.1.2.13])
TR29803|c1_g6_i2	895.205	82.6403	-3.4373	4.05989e-06	0.00350564	Yes	PREDICTED: 17.8 kDa class I heat shock protein-like	Sesamum indicum	NA	NA	NA	NA	NA
TR35316|c0_g5_i1	243.949	22.0374	-3.46855	7.05743e-05	0.0283861	Yes	PREDICTED: proteasome subunit beta type-4-like	Sesamum indicum	NA	NA	NA	NA	NA
TR27415|c0_g1_i1	3461.03	310.36	-3.47918	4.87861e-06	0.00414572	Yes	hypothetical protein MIMGU_mgv1a015106mg	Mimulus guttatus	NA	photosynthesis[GO:0015979]	NA	photosystem I[GO:0009522]	NA
TR42812|c3_g4_i5	226.524	20.201	-3.48717	7.71294e-05	0.0303055	Yes	hypothetical protein MIMGU_mgv1a009480mg	Mimulus guttatus	NA	dephosphorylation[GO:0016311] ; carbohydrate metabolic process[GO:0005975]	fructose 1,6-bisphosphate 1-phosphatase activity[GO:0042132]	NA	map00030:Pentose phosphate pathway(hexose diphosphatase[ec:3.1.3.11]) ; map01130:Biosynthesis of antibiotics(hexose diphosphatase[ec:3.1.3.11]) ; map00051:Fructose and mannose metabolism(hexose diphosphatase[ec:3.1.3.11]) ; map00710:Carbon fixation in photosynthetic organisms(hexose diphosphatase[ec:3.1.3.11]) ; map00010:Glycolysis / Gluconeogenesis(hexose diphosphatase[ec:3.1.3.11]) ; map00680:M…
TR34005|c0_g3_i3	810.259	71.6216	-3.49992	3.44336e-06	0.00307099	Yes	hypothetical protein MIMGU_mgv1a013841mg	Mimulus guttatus	NA	NA	NA	NA	NA
TR40179|c3_g7_i3	424.732	36.729	-3.53156	1.41064e-05	0.00916866	Yes	PREDICTED: glucan endo-1,3-beta-glucosidase, basic isoform-like	Camelina sativa	NA	NA	NA	NA	NA
TR3835|c0_g1_i2	1158.76	99.1683	-3.54656	1.63602e-06	0.00205668	Yes	PREDICTED: epidermis-specific secreted glycoprotein EP1-like	Sesamum indicum	NA	NA	NA	NA	NA
TR3151|c0_g4_i2	3095.1	262.612	-3.55898	2.54809e-06	0.00263355	Yes	NA	NA	NA	NA	NA	NA	NA
TR2563|c0_g5_i1	326.717	27.5468	-3.56809	2.39403e-05	0.0132509	Yes	PREDICTED: macrophage migration inhibitory factor homolog isoform X2	Phoenix dactylifera	NA	NA	NA	NA	NA
TR41456|c2_g1_i3	659.969	55.0935	-3.58244	3.39532e-06	0.00308761	Yes	PREDICTED: phospho-2-dehydro-3-deoxyheptonate aldolase 2, chloroplastic	Sesamum indicum	NA	NA	NA	NA	NA
TR41900|c1_g1_i1	180.784	14.6916	-3.6212	7.11412e-05	0.0283705	Yes	PREDICTED: 2-isopropylmalate synthase A-like	Sesamum indicum	NA	NA	NA	NA	NA
TR33604|c0_g2_i3	137.221	11.0187	-3.63848	9.73772e-05	0.0351381	Yes	NA	NA	NA	NA	NA	NA	NA
TR3024|c0_g1_i1	581.557	45.9113	-3.663	3.10317e-06	0.00296873	Yes	PREDICTED: 1-aminocyclopropane-1-carboxylate oxidase 5-like	Sesamum indicum	NA	NA	NA	NA	NA
TR34090|c0_g4_i3	468.295	36.729	-3.67243	5.65531e-06	0.00465809	Yes	BnaC03g46680D	Brassica napus	NA	NA	ATP binding[GO:0005524]	NA	NA
TR32955|c0_g7_i4	400.773	31.2197	-3.68226	8.71561e-06	0.00646889	Yes	NA	NA	NA	NA	NA	NA	NA
TR7805|c1_g5_i4	472.651	36.729	-3.68578	5.17373e-06	0.00432237	Yes	PREDICTED: photosystem II 22 kDa protein, chloroplastic-like	Solanum tuberosum	NA	NA	NA	NA	NA
TR8164|c0_g4_i1	361.567	27.5468	-3.71431	1.01909e-05	0.007069	Yes	hypothetical protein GLYMA_12G1662001, partial	Glycine max	NA	NA	NA	NA	NA
TR36925|c0_g3_i1	363.745	27.5468	-3.72297	9.67098e-06	0.00679105	Yes	NA	NA	NA	NA	NA	NA	NA
TR40105|c0_g3_i1	703.531	53.2571	-3.72357	1.44984e-06	0.00186275	Yes	PREDICTED: tryptophan synthase beta chain 1	Erythranthe guttatus	NA	NA	NA	NA	NA
TR31615|c0_g2_i4	1413.6	102.841	-3.78088	3.793e-07	0.00071294	Yes	hypothetical protein PRUPE_ppa010884mg	Prunus persica	NA	photosynthesis[GO:0015979]	calcium ion binding[GO:0005509]	photosystem II oxygen evolving complex[GO:0009654] ; extrinsic component of membrane[GO:0019898]	NA
TR8164|c0_g2_i3	202.565	14.6916	-3.78532	3.33284e-05	0.016392	Yes	hypothetical protein M569_07782, partial	Genlisea aurea	NA	NA	NA	NA	NA
TR37080|c0_g1_i1	644.722	45.9113	-3.81176	1.14455e-06	0.00150112	Yes	PREDICTED: probable aldo-keto reductase 2 isoform X1	Sesamum indicum	NA	NA	NA	NA	NA
TR7805|c1_g8_i4	1860.11	132.224	-3.81433	3.12337e-07	0.000657334	Yes	PsbS	Pisum sativum	NA	NA	NA	NA	NA
TR4017|c0_g3_i2	2173.76	152.425	-3.83402	3.16503e-07	0.000642181	Yes	PREDICTED: ATP synthase delta chain, chloroplastic-like	Sesamum indicum	NA	NA	NA	NA	NA
TR38383|c0_g3_i5	185.14	12.8552	-3.8482	3.14486e-05	0.0157511	Yes	PREDICTED: protein TIFY 7	Sesamum indicum	NA	NA	NA	NA	NA
TR43864|c1_g6_i1	505.323	34.8926	-3.85621	1.91365e-06	0.0022864	Yes	PREDICTED: galactinol--sucrose galactosyltransferase	Sesamum indicum	NA	NA	NA	NA	NA
TR42531|c0_g1_i6	213.455	14.6916	-3.86087	2.29422e-05	0.0131105	Yes	unknown	Glycine max	NA	carbohydrate metabolic process[GO:0005975]	glycogen phosphorylase activity[GO:0008184]	NA	NA
TR36039|c0_g1_i5	801.546	55.0935	-3.86283	5.29472e-07	0.000796085	Yes	PREDICTED: GDSL esterase/lipase At5g33370-like isoform X2	Erythranthe guttatus	NA	NA	NA	NA	NA
TR3102|c1_g1_i1	855.999	58.7664	-3.86455	4.57428e-07	0.000776472	Yes	NA	NA	NA	NA	NA	NA	NA
TR2435|c0_g2_i1	1931.99	130.388	-3.8892	2.06716e-07	0.000519186	Yes	PREDICTED: ferredoxin, chloroplastic-like	Solanum lycopersicum	NA	electron transport chain[GO:0022900]	metal ion binding[GO:0046872] ; electron carrier activity[GO:0009055] ; 2 iron, 2 sulfur cluster binding[GO:0051537]	NA	NA
TR2335|c0_g2_i1	165.537	11.0187	-3.90913	3.10081e-05	0.0158524	Yes	NA	NA	NA	NA	NA	NA	NA
TR30798|c0_g7_i3	1877.54	123.042	-3.93162	1.58724e-07	0.000440773	Yes	PREDICTED: ruBisCO large subunit-binding protein subunit beta, chloroplastic	Sesamum indicum	NA	NA	NA	NA	NA
TR41462|c0_g1_i3	450.87	29.3832	-3.93965	1.93789e-06	0.00227071	Yes	hypothetical protein MIMGU_mgv1a003782mg	Mimulus guttatus	NA	protein phosphorylation[GO:0006468]	ATP binding[GO:0005524] ; protein serine/threonine kinase activity[GO:0004674]	integral component of membrane[GO:0016021]	NA
TR39520|c1_g3_i2	424.732	27.5468	-3.9466	2.30994e-06	0.00258872	Yes	PREDICTED: aspartic proteinase-like isoform X1	Sesamum indicum	NA	NA	NA	NA	NA
TR37246|c0_g2_i1	577.201	36.729	-3.97408	7.0668e-07	0.00100644	Yes	PREDICTED: uncharacterized protein LOC104711140	Camelina sativa	NA	NA	NA	NA	NA
TR40433|c1_g1_i7	644.722	40.4019	-3.99618	4.5574e-07	0.000800599	Yes	PREDICTED: protein NRT1/ PTR FAMILY 5.10-like	Sesamum indicum	NA	NA	NA	NA	NA
TR8164|c0_g1_i2	557.598	34.8926	-3.99823	7.04945e-07	0.00103147	Yes	chloroplast heat shock protein 70-2, partial	Genlisea aurea	NA	NA	ATP binding[GO:0005524]	NA	NA
TR3031|c1_g1_i1	235.236	14.6916	-4.00105	1.09904e-05	0.00752443	Yes	PREDICTED: putative laccase-9	Erythranthe guttatus	NA	NA	NA	NA	NA
TR44165|c1_g3_i3	383.348	23.8739	-4.00515	2.53066e-06	0.00266515	Yes	hypothetical protein OsI_15715	Oryza sativa Indica Group	NA	NA	NA	NA	NA
TR40635|c1_g5_i1	213.455	12.8552	-4.05352	1.16573e-05	0.00790065	Yes	NA	NA	NA	NA	NA	NA	NA
TR33020|c0_g6_i9	988.864	58.7664	-4.07271	1.11993e-07	0.000393277	Yes	hypothetical protein MIMGU_mgv1a014490mg	Mimulus guttatus	NA	translation[GO:0006412]	structural constituent of ribosome[GO:0003735]	ribosome[GO:0005840]	NA
TR36609|c3_g2_i5	1034.6	60.6029	-4.09355	9.2024e-08	0.000346124	Yes	lipid transfer protein 2	Salvia miltiorrhiza	NA	lipid transport[GO:0006869]	lipid binding[GO:0008289]	NA	NA
TR29763|c3_g4_i2	535.816	31.2197	-4.10121	4.9712e-07	0.000793257	Yes	PREDICTED: 36.4 kDa proline-rich protein isoform X1	Cucumis melo	NA	NA	NA	NA	NA
TR39127|c1_g1_i4	633.832	36.729	-4.10911	2.72368e-07	0.000596938	Yes	NA	NA	NA	NA	NA	NA	NA
TR3102|c1_g1_i2	1775.16	93.659	-4.24439	2.47365e-08	0.000130097	Yes	PREDICTED: inositol-3-phosphate synthase-like	Sesamum indicum	NA	NA	NA	NA	NA
TR29823|c5_g2_i2	1258.95	66.1122	-4.25116	2.82479e-08	0.000135029	Yes	SMLII	Salvia miltiorrhiza	NA	NA	NA	NA	NA
TR20366|c0_g2_i1	585.913	29.3832	-4.31762	1.27346e-07	0.000371623	Yes	NA	NA	NA	NA	NA	NA	NA
TR20137|c0_g1_i2	259.196	12.8552	-4.33362	2.46915e-06	0.00265505	Yes	Os02g0519900, partial	Oryza sativa Japonica Group	NA	NA	NA	NA	NA
TR37001|c0_g6_i2	337.608	14.6916	-4.52228	4.67736e-07	0.000770313	Yes	fructose-bisphosphate aldolase	Plantago major	NA	glycolytic process[GO:0006096]	fructose-bisphosphate aldolase activity[GO:0004332]	NA	map00030:Pentose phosphate pathway(aldolase[ec:4.1.2.13]) ; map01130:Biosynthesis of antibiotics(aldolase[ec:4.1.2.13]) ; map00051:Fructose and mannose metabolism(aldolase[ec:4.1.2.13]) ; map00710:Carbon fixation in photosynthetic organisms(aldolase[ec:4.1.2.13]) ; map00010:Glycolysis / Gluconeogenesis(aldolase[ec:4.1.2.13]) ; map00680:Methane metabolism(aldolase[ec:4.1.2.13])
TR37193|c1_g6_i1	387.705	14.6916	-4.72189	1.22856e-07	0.00038109	Yes	NA	NA	NA	NA	NA	NA	NA
TR35255|c2_g2_i5	291.867	11.0187	-4.72729	3.79925e-07	0.000690172	Yes	hypothetical protein CARUB_v10016258mg	Capsella rubella	NA	photosynthesis, light harvesting[GO:0009765] ; protein-chromophore linkage[GO:0018298]	metal ion binding[GO:0046872] ; chlorophyll binding[GO:0016168]	photosystem II[GO:0009523] ; integral component of membrane[GO:0016021] ; chloroplast[GO:0009507] ; photosystem I[GO:0009522]	NA
TR2255|c10_g1_i1	694.819	25.7103	-4.75622	7.88344e-09	4.61164e-05	Yes	lavandulyl diphsophate synthase	Lavandula x intermedia	NA	NA	NA	NA	NA
TR27032|c0_g3_i2	579.379	18.3645	-4.97951	5.74539e-09	3.78573e-05	Yes	NA	NA	NA	NA	NA	NA	NA
TR19875|c0_g1_i2	524.926	14.6916	-5.15905	4.26526e-09	3.21293e-05	Yes	TPA: histone H3	Zea mays	NA	glucose catabolic process[GO:0006007] ; protein targeting[GO:0006605]	DNA binding[GO:0003677] ; protein heterodimerization activity[GO:0046982]	integral component of membrane[GO:0016021] ; nucleosome[GO:0000786] ; nucleus[GO:0005634]	NA
TR36925|c0_g4_i2	910.452	18.3645	-5.63159	3.28577e-11	4.33219e-07	Yes	Q8OMT_MENPIRecName: Full=8-hydroxyquercetin 8-O-methyltransferase; AltName: Full=Flavonol 8-O-methyltransferase	Mentha piperita	Lamiaceae	methylation[GO:0032259] ; flavonoid metabolic process[GO:0009812]	8-hydroxyquercitin 8-O-methyltransferase activity[GO:0030761] ; O-methyltransferase activity[GO:0008171] ; protein dimerization activity[GO:0046983]	NA	NA
TR31788|c0_g1_i1	16462.2	269.958	-5.93028	6.50292e-08	0.000285301	Yes	hypothetical protein JCGZ_05889	Jatropha curcas	NA	photorespiration[GO:0009853] ; oxidation-reduction process[GO:0055114] ; photosynthesis[GO:0015979] ; carbon fixation[GO:0015977]	ribulose-bisphosphate carboxylase activity[GO:0016984] ; monooxygenase activity[GO:0004497]	chloroplast[GO:0009507]	map00630:Glyoxylate and dicarboxylate metabolism(carboxylase[ec:4.1.1.39]) ; map01130:Biosynthesis of antibiotics(carboxylase[ec:4.1.1.39]) ; map00710:Carbon fixation in photosynthetic organisms(carboxylase[ec:4.1.1.39])
TR33839|c1_g4_i4	1600.91	25.7103	-5.96041	1.12857e-12	1.98394e-08	Yes	NA	NA	NA	NA	NA	NA	NA
TR34270|c2_g4_i3	19.603	194.664	3.31183	0.000211661	0.0596171	No	NA	NA	NA	NA	NA	NA	NA
TR25557|c0_g1_i2	21.7812	213.028	3.28989	0.000196769	0.0585538	No	PREDICTED: uncharacterized protein LOC105168254	Sesamum indicum	NA	NA	NA	NA	NA
TR33994|c2_g1_i1	15.2468	139.57	3.19441	0.000468016	0.104012	No	NA	NA	NA	NA	NA	NA	NA
TR38613|c0_g2_i7	23.9593	216.701	3.17705	0.000282344	0.0736205	No	NA	NA	NA	NA	NA	NA	NA
TR43270|c0_g2_i4	32.6717	260.776	2.9967	0.000382682	0.0907939	No	PREDICTED: primary amine oxidase-like	Sesamum indicum	NA	NA	NA	NA	NA
TR30741|c0_g8_i3	1302.51	10230.9	2.97356	0.000755328	0.136714	No	PREDICTED: chlorophyll a-b binding protein 5, chloroplastic	Sesamum indicum	NA	NA	NA	NA	NA
TR33197|c0_g1_i10	43.5623	334.234	2.93971	0.000301905	0.0768195	No	PREDICTED: uncharacterized protein LOC105175007	Sesamum indicum	NA	NA	NA	NA	NA
TR24986|c0_g1_i1	28.3155	216.701	2.93604	0.000648882	0.126582	No	PREDICTED: E3 ubiquitin-protein ligase RNF13-like	Sesamum indicum	NA	NA	NA	NA	NA
TR35480|c0_g1_i3	58.8091	448.094	2.92969	0.000174575	0.0528451	No	PREDICTED: uncharacterized protein LOC105164999	Sesamum indicum	NA	NA	NA	NA	NA
TR39555|c1_g3_i1	34.8498	258.939	2.89339	0.000562103	0.118902	No	PREDICTED: probable 6-phosphogluconolactonase 4, chloroplastic	Sesamum indicum	NA	NA	NA	NA	NA
TR33469|c1_g5_i1	32.6717	242.411	2.89134	0.000633363	0.124943	No	PREDICTED: glutathione S-transferase DHAR3, chloroplastic	Sesamum indicum	NA	NA	NA	NA	NA
TR25093|c1_g3_i1	681.75	5050.24	2.88904	0.000207657	0.0597678	No	glycine-rich protein 1	Boea hygrometrica	NA	NA	NA	NA	NA
TR31954|c1_g3_i2	15.2468	112.023	2.87722	0.00145145	0.214745	No	PREDICTED: abscisic acid receptor PYL4	Sesamum indicum	NA	NA	NA	NA	NA
TR38320|c0_g6_i3	34.8498	249.757	2.8413	0.000719161	0.132909	No	PREDICTED: uncharacterized protein LOC105967667	Erythranthe guttatus	NA	NA	NA	NA	NA
TR19607|c0_g1_i1	65.3435	462.785	2.82423	0.000253998	0.0682568	No	PREDICTED: 15.4 kDa class V heat shock protein	Sesamum indicum	NA	NA	NA	NA	NA
TR40809|c0_g5_i4	82.7684	583.991	2.81879	0.000169773	0.0516885	No	PREDICTED: uncharacterized protein LOC105157533	Sesamum indicum	NA	NA	NA	NA	NA
TR44215|c1_g7_i3	39.2061	275.468	2.81273	0.0006765	0.127713	No	PREDICTED: probable galactinol--sucrose galactosyltransferase 2	Sesamum indicum	NA	NA	NA	NA	NA
TR3549|c0_g8_i1	13.0687	91.8225	2.81273	0.0017698	0.231883	No	PREDICTED: glutaredoxin-C6	Vitis vinifera	NA	cell redox homeostasis[GO:0045454] ; oxidation-reduction process[GO:0055114]	electron carrier activity[GO:0009055] ; protein disulfide oxidoreductase activity[GO:0015035]	cell[GO:0005623]	NA
TR29125|c1_g2_i1	23.9593	167.117	2.8022	0.00138	0.20947	No	NA	NA	NA	NA	NA	NA	NA
TR12042|c0_g1_i1	21.7812	150.589	2.78946	0.00158134	0.221518	No	PREDICTED: pleiotropic drug resistance protein 2-like	Sesamum indicum	NA	NA	NA	NA	NA
TR37487|c0_g3_i1	28.3155	194.664	2.78132	0.0012651	0.197727	No	hypothetical protein MIMGU_mgv1a011894mg	Mimulus guttatus	NA	NA	NA	NA	NA
TR40225|c1_g5_i1	82.7684	561.954	2.7633	0.000231001	0.0637019	No	PREDICTED: golgin candidate 4	Erythranthe guttatus	NA	NA	NA	NA	NA
TR40414|c0_g1_i7	45.7404	304.851	2.73656	0.000758385	0.136798	No	PREDICTED: urea-proton symporter DUR3	Sesamum indicum	NA	NA	NA	NA	NA
TR35469|c1_g1_i3	28.3155	187.318	2.72583	0.0015867	0.221679	No	NA	NA	NA	NA	NA	NA	NA
TR2563|c0_g4_i1	26.1374	172.626	2.72347	0.00172903	0.228245	No	NA	NA	NA	NA	NA	NA	NA
TR50839|c0_g1_i1	13.0687	86.3132	2.72347	0.00228978	0.265066	No	NA	NA	NA	NA	NA	NA	NA
TR33654|c0_g9_i4	32.6717	214.865	2.71731	0.0013832	0.209352	No	PREDICTED: uncharacterized protein LOC105179131	Sesamum indicum	NA	NA	NA	NA	NA
TR29306|c1_g1_i1	32.6717	213.028	2.70493	0.00145865	0.214604	No	O-methyltransferase	Mentha x piperita	NA	NA	methyltransferase activity[GO:0008168]	NA	NA
TR36899|c1_g4_i12	43.5623	282.813	2.6987	0.000979625	0.164324	No	hypothetical protein MIMGU_mgv1a016465mg	Mimulus guttatus	NA	NA	NA	NA	NA
TR12563|c0_g1_i1	21.7812	141.407	2.6987	0.00221577	0.258773	No	NA	NA	NA	NA	NA	NA	NA
TR33439|c0_g5_i14	3951.1	25550.5	2.69303	0.0154905	0.612537	No	PREDICTED: chlorophyll a-b binding protein 21, chloroplastic-like	Sesamum indicum	NA	NA	NA	NA	NA
TR40678|c0_g2_i1	23.9593	154.262	2.68673	0.00214689	0.25411	No	PREDICTED: RING finger and CHY zinc finger domain-containing protein 1-like isoform X2	Sesamum indicum	NA	NA	NA	NA	NA
TR39403|c0_g4_i5	34.8498	224.047	2.68458	0.00145952	0.214134	No	PREDICTED: GDSL esterase/lipase At1g29670-like	Sesamum indicum	NA	NA	NA	NA	NA
TR44018|c4_g2_i1	32.6717	209.355	2.67984	0.00162272	0.223745	No	unnamed protein product	Coffea canephora	NA	NA	NA	NA	NA
TR33439|c0_g5_i15	1555.17	9949.89	2.6776	0.00212828	0.253044	No	NA	NA	NA	NA	NA	NA	NA
TR30741|c0_g8_i1	768.875	4903.32	2.67294	0.000524936	0.112394	No	chlorophyll a/b-binding protein	Tagetes erecta	NA	photosynthesis, light harvesting[GO:0009765] ; protein-chromophore linkage[GO:0018298]	metal ion binding[GO:0046872] ; chlorophyll binding[GO:0016168]	photosystem II[GO:0009523] ; integral component of membrane[GO:0016021] ; chloroplast[GO:0009507] ; photosystem I[GO:0009522]	NA
TR31283|c0_g5_i1	32.6717	207.519	2.66713	0.00171188	0.22712	No	NA	NA	NA	NA	NA	NA	NA
TR30451|c0_g2_i1	30.4936	192.827	2.66073	0.00190518	0.238355	No	Proline-rich protein	Medicago truncatula	NA	NA	NA	NA	NA
TR38920|c1_g10_i15	32.6717	205.682	2.6543	0.00180616	0.234316	No	NA	NA	NA	NA	NA	NA	NA
TR43164|c5_g2_i1	26.1374	163.444	2.64461	0.00233816	0.268308	No	NA	NA	NA	NA	NA	NA	NA
TR3037|c0_g3_i3	143.756	898.024	2.64314	0.000228239	0.0636062	No	NA	NA	NA	NA	NA	NA	NA
TR50112|c0_g1_i1	17.4249	108.351	2.63648	0.00306527	0.304624	No	NA	NA	NA	NA	NA	NA	NA
TR39174|c0_g4_i9	19.603	121.206	2.62831	0.00302806	0.303215	No	NA	NA	NA	NA	NA	NA	NA
TR35055|c0_g2_i2	1248.06	7711.25	2.62728	0.00153217	0.219893	No	PREDICTED: thiamine thiazole synthase 1, chloroplastic	Eucalyptus grandis	NA	NA	NA	NA	NA
TR14459|c0_g1_i1	34.8498	213.028	2.61182	0.00199208	0.243445	No	NA	NA	NA	NA	NA	NA	NA
TR34800|c0_g2_i1	17.4249	106.514	2.61182	0.00331406	0.316797	No	PREDICTED: glucan endo-1,3-beta-glucosidase, acidic isoform PR-Q'-like	Sesamum indicum	NA	NA	NA	NA	NA
TR35232|c0_g2_i3	28.3155	172.626	2.60799	0.0025113	0.276722	No	PREDICTED: dammarenediol 12-hydroxylase-like	Erythranthe guttatus	NA	NA	NA	NA	NA
TR40462|c1_g6_i1	63.1653	383.818	2.60322	0.000873603	0.150371	No	NA	NA	NA	NA	NA	NA	NA
TR33675|c0_g4_i1	23.9593	145.08	2.59819	0.00297608	0.299719	No	PREDICTED: ribulose-phosphate 3-epimerase, cytoplasmic isoform isoform X1	Sesamum indicum	NA	NA	NA	NA	NA
TR32606|c0_g5_i1	13.0687	78.9674	2.59514	0.00327377	0.314658	No	hypothetical protein MIMGU_mgv1a006023mg	Mimulus guttatus	NA	NA	transferase activity[GO:0016740]	NA	NA
TR34091|c4_g1_i1	145.934	879.66	2.59163	0.000296457	0.0757994	No	PREDICTED: probable WRKY transcription factor 40	Sesamum indicum	NA	NA	NA	NA	NA
TR38920|c1_g10_i12	30.4936	183.645	2.59034	0.00251861	0.275796	No	NA	NA	NA	NA	NA	NA	NA
TR7955|c1_g1_i2	200.387	1206.55	2.59003	0.000245901	0.0664198	No	hypothetical protein MIMGU_mgv1a001731mg	Mimulus guttatus	NA	proteolysis[GO:0006508]	serine-type endopeptidase activity[GO:0004252]	NA	NA
TR7416|c0_g1_i2	163.359	980.664	2.58572	0.000280318	0.0734559	No	PREDICTED: uncharacterized protein LOC105160472	Sesamum indicum	NA	NA	NA	NA	NA
TR44164|c4_g10_i7	45.7404	273.631	2.58069	0.0015693	0.221008	No	hypothetical protein MIMGU_mgv1a022389mg	Mimulus guttatus	NA	NA	NA	NA	NA
TR40414|c0_g1_i4	187.318	1120.23	2.58024	0.000266116	0.0707909	No	PREDICTED: urea-proton symporter DUR3	Sesamum indicum	NA	NA	NA	NA	NA
TR33439|c0_g5_i12	23.9593	143.243	2.57981	0.00318043	0.309071	No	putative chloroplast chlorophyll a/b binding protein	Vitis hybrid cultivar	NA	photosynthesis, light harvesting[GO:0009765] ; protein-chromophore linkage[GO:0018298]	chlorophyll binding[GO:0016168]	photosystem II[GO:0009523] ; integral component of membrane[GO:0016021] ; chloroplast[GO:0009507]	NA
TR25221|c0_g1_i2	444.336	2655.51	2.57927	0.000345935	0.0847476	No	hypothetical protein M569_11308, partial	Genlisea aurea	NA	metabolic process[GO:0008152]	transferase activity, transferring hexosyl groups[GO:0016758]	NA	NA
TR40635|c1_g7_i1	34.8498	207.519	2.57402	0.00233125	0.268099	No	PREDICTED: phosphoglucan phosphatase DSP4, amyloplastic	Sesamum indicum	NA	NA	NA	NA	NA
TR2523|c0_g2_i1	1180.54	7015.24	2.57105	0.00158954	0.221488	No	PREDICTED: chlorophyll a-b binding protein 21, chloroplastic-like	Sesamum indicum	NA	NA	NA	NA	NA
TR33439|c0_g13_i4	1065.1	6308.21	2.56624	0.00132199	0.203004	No	NA	NA	NA	NA	NA	NA	NA
TR40403|c0_g2_i3	128.509	758.454	2.56119	0.000392113	0.0922008	No	PREDICTED: glycosylphosphatidylinositol anchor attachment 1 protein	Sesamum indicum	NA	NA	NA	NA	NA
TR28284|c0_g1_i1	32.6717	192.827	2.56119	0.00263786	0.281823	No	hypothetical protein MIMGU_mgv1a014165mg	Mimulus guttatus	NA	NA	NA	integral component of membrane[GO:0016021]	NA
TR42765|c7_g10_i2	10.8906	64.2758	2.56119	0.0030452	0.303776	No	NA	NA	NA	NA	NA	NA	NA
TR33439|c0_g2_i1	753.628	4431.35	2.55582	0.000748025	0.136329	No	hypothetical protein PHAVU_004G093100g	Phaseolus vulgaris	NA	photosynthesis, light harvesting[GO:0009765] ; protein-chromophore linkage[GO:0018298]	chlorophyll binding[GO:0016168]	photosystem II[GO:0009523] ; integral component of membrane[GO:0016021] ; chloroplast[GO:0009507]	NA
TR34270|c2_g4_i1	296.224	1737.28	2.55207	0.000294535	0.0756754	No	NA	NA	NA	NA	NA	NA	NA
TR31876|c0_g4_i3	121.974	714.379	2.55011	0.000438822	0.100492	No	PREDICTED: protein GDAP2 homolog	Sesamum indicum	NA	NA	NA	NA	NA
TR42206|c0_g3_i4	34.8498	203.846	2.54826	0.00259048	0.279596	No	PREDICTED: ethanolamine-phosphate cytidylyltransferase-like	Sesamum indicum	NA	NA	NA	NA	NA
TR33439|c0_g5_i1	193.852	1133.09	2.54723	0.000310553	0.0778911	No	NA	NA	NA	NA	NA	NA	NA
TR2900|c0_g2_i2	3068.96	17932.9	2.54679	0.0107925	0.539838	No	PREDICTED: chlorophyll a-b binding protein 8, chloroplastic	Sesamum indicum	NA	NA	NA	NA	NA
TR4029|c0_g1_i4	60.9872	356.271	2.5464	0.00122279	0.196358	No	NA	NA	NA	NA	NA	NA	NA
TR30741|c0_g2_i1	52.2748	304.851	2.54392	0.00153737	0.22004	No	PREDICTED: chlorophyll a-b binding protein 13, chloroplastic	Sesamum indicum	NA	NA	NA	NA	NA
TR32848|c1_g3_i4	21.7812	126.715	2.54044	0.00387525	0.342472	No	PREDICTED: lipoxygenase homology domain-containing protein 1-like	Sesamum indicum	NA	NA	NA	NA	NA
TR33024|c0_g1_i3	19.603	113.86	2.53811	0.00408255	0.350787	No	PREDICTED: putative 12-oxophytodienoate reductase 11	Sesamum indicum	NA	NA	NA	NA	NA
TR31495|c1_g1_i2	93.659	543.589	2.53703	0.000645737	0.126909	No	PREDICTED: late embryogenesis abundant protein Lea5-like	Nicotiana sylvestris	NA	NA	NA	NA	NA
TR41876|c1_g1_i12	182.962	1061.47	2.53645	0.000337825	0.0835379	No	unnamed protein product	Vitis vinifera	NA	transport[GO:0006810]	transporter activity[GO:0005215]	integral component of membrane[GO:0016021]	NA
TR30799|c0_g2_i1	32.6717	189.154	2.53345	0.00294262	0.298059	No	hypothetical protein MIMGU_mgv1a017508mg	Mimulus guttatus	NA	ATP hydrolysis coupled proton transport[GO:0015991]	hydrogen ion transmembrane transporter activity[GO:0015078]	proton-transporting V-type ATPase, V0 domain[GO:0033179] ; integral component of membrane[GO:0016021]	NA
TR40831|c0_g3_i11	30.4936	176.299	2.53145	0.00315582	0.30896	No	PREDICTED: zinc finger CCCH domain-containing protein 29-like	Sesamum indicum	NA	NA	NA	NA	NA
TR37300|c2_g4_i9	15.2468	88.1496	2.53145	0.00415252	0.354485	No	PREDICTED: tryptophan aminotransferase-related protein 4-like	Sesamum indicum	NA	NA	NA	NA	NA
TR28190|c0_g2_i2	26.1374	150.589	2.52643	0.0036213	0.332295	No	hydroxymethylglutaryl-CoA synthase	Lavandula angustifolia	Lamiaceae	isoprenoid biosynthetic process[GO:0008299]	hydroxymethylglutaryl-CoA synthase activity[GO:0004421]	NA	map00072:Synthesis and degradation of ketone bodies(synthase[ec:2.3.3.10]) ; map01130:Biosynthesis of antibiotics(synthase[ec:2.3.3.10]) ; map00280:Valine, leucine and isoleucine degradation(synthase[ec:2.3.3.10]) ; map00650:Butanoate metabolism(synthase[ec:2.3.3.10]) ; map00900:Terpenoid backbone biosynthesis(synthase[ec:2.3.3.10])
TR32208|c1_g4_i1	13.0687	75.2945	2.52643	0.00393792	0.344542	No	NA	NA	NA	NA	NA	NA	NA
TR33439|c0_g6_i2	267.908	1538.95	2.52213	0.000332416	0.0825881	No	hypothetical protein MIMGU_mgv1a012019mg	Mimulus guttatus	NA	photosynthesis, light harvesting[GO:0009765] ; protein-chromophore linkage[GO:0018298]	metal ion binding[GO:0046872] ; chlorophyll binding[GO:0016168]	photosystem II[GO:0009523] ; integral component of membrane[GO:0016021] ; chloroplast[GO:0009507] ; photosystem I[GO:0009522]	NA
TR37265|c0_g1_i1	211.277	1206.55	2.51368	0.0003564	0.0857166	No	PREDICTED: PI-PLC X-box domain-containing protein DDB_G0293730	Sesamum indicum	NA	NA	NA	NA	NA
TR39683|c3_g1_i5	47.9185	273.631	2.51358	0.00198749	0.244016	No	hypothetical protein MIMGU_mgv1a007342mg	Mimulus guttatus	NA	NA	NA	NA	NA
TR25221|c0_g1_i1	492.254	2807.93	2.51203	0.000505572	0.110037	No	PREDICTED: 7-deoxyloganetin glucosyltransferase-like	Sesamum indicum	NA	NA	NA	NA	NA
TR40759|c2_g1_i3	548.885	3127.47	2.51042	0.000572832	0.120206	No	PREDICTED: beta-D-xylosidase 1	Sesamum indicum	NA	NA	NA	NA	NA
TR2523|c0_g3_i2	150.29	855.786	2.5095	0.000444998	0.101028	No	PREDICTED: chlorophyll a-b binding protein 21, chloroplastic-like	Sesamum indicum	NA	NA	NA	NA	NA
TR42728|c1_g7_i1	17.4249	99.1683	2.50873	0.00454705	0.371891	No	PREDICTED: root phototropism protein 2-like	Sesamum indicum	NA	NA	NA	NA	NA
TR31482|c1_g3_i2	67.5216	383.818	2.507	0.001264	0.198143	No	hypothetical protein VITISV_026753	Vitis vinifera	NA	NA	NA	NA	NA
TR33988|c1_g1_i1	32.6717	185.481	2.50516	0.00328421	0.315087	No	PREDICTED: probable S-adenosylmethionine-dependent methyltransferase At5g37990	Sesamum indicum	NA	NA	NA	NA	NA
TR44164|c4_g10_i5	47.9185	269.958	2.49408	0.00216722	0.255368	No	hypothetical protein MIMGU_mgv1a022389mg	Mimulus guttatus	NA	NA	NA	integral component of membrane[GO:0016021]	NA
TR3702|c0_g1_i1	45.7404	257.103	2.49081	0.00234109	0.26806	No	NA	NA	NA	NA	NA	NA	NA
TR3001|c2_g1_i2	100.193	561.954	2.48767	0.000761139	0.13636	No	hypothetical protein L484_014228	Morus notabilis	NA	NA	NA	NA	NA
TR41231|c0_g2_i3	104.55	585.828	2.48629	0.000727542	0.133987	No	PREDICTED: pentatricopeptide repeat-containing protein At3g59040	Sesamum indicum	NA	NA	NA	NA	NA
TR34371|c2_g1_i1	1459.34	8170.37	2.48509	0.00294371	0.297597	No	PREDICTED: uncharacterized protein LOC105165426	Sesamum indicum	NA	NA	NA	NA	NA
TR16897|c0_g1_i1	23.9593	134.061	2.48423	0.00445728	0.367977	No	NA	NA	NA	NA	NA	NA	NA
TR8231|c0_g1_i1	23.9593	134.061	2.48423	0.00445728	0.368555	No	PREDICTED: probable protein S-acyltransferase 22 isoform X2	Sesamum indicum	NA	NA	NA	NA	NA
TR7486|c0_g1_i5	69.6997	387.491	2.47494	0.00140708	0.210546	No	unnamed protein product	Coffea canephora	NA	NA	NA	NA	NA
TR30451|c0_g2_i5	117.618	653.776	2.47469	0.000675077	0.128365	No	NA	NA	NA	NA	NA	NA	NA
TR7115|c2_g2_i1	298.402	1658.31	2.47439	0.000425387	0.09827	No	NA	NA	NA	NA	NA	NA	NA
TR36400|c0_g1_i5	135.043	749.272	2.47207	0.000594148	0.120828	No	PREDICTED: beta-glucosidase 11-like isoform X3	Solanum tuberosum	NA	NA	NA	NA	NA
TR40182|c1_g2_i1	15.2468	84.4767	2.47005	0.00494173	0.386755	No	NA	NA	NA	NA	NA	NA	NA
TR42204|c1_g3_i3	39.2061	216.701	2.46656	0.00315602	0.308406	No	PREDICTED: uncharacterized protein LOC105155456	Sesamum indicum	NA	NA	NA	NA	NA
TR20188|c0_g2_i1	19.603	108.351	2.46656	0.00512968	0.394431	No	NA	NA	NA	NA	NA	NA	NA
TR36534|c0_g1_i1	23.9593	132.224	2.46433	0.00477382	0.380396	No	NA	NA	NA	NA	NA	NA	NA
TR18686|c0_g1_i1	60.9872	336.07	2.46218	0.00181968	0.234913	No	PREDICTED: non-specific lipid-transfer protein 2-like	Pyrus x bretschneideri	NA	NA	NA	NA	NA
TR31380|c1_g3_i1	32.6717	179.972	2.46166	0.00387599	0.341964	No	PREDICTED: protein RADIALIS-like 1	Sesamum indicum	NA	NA	NA	NA	NA
TR39035|c0_g1_i1	755.806	4163.23	2.46162	0.00103602	0.172685	No	endopeptidase 1	Plantago major	NA	proteolysis[GO:0006508]	peptidase activity[GO:0008233]	NA	NA
TR31264|c0_g2_i3	601.16	3301.94	2.45749	0.00078046	0.138877	No	PREDICTED: thaumatin-like protein	Sesamum indicum	NA	NA	NA	NA	NA
TR30254|c1_g1_i2	67.5216	369.126	2.45069	0.0016601	0.224202	No	PREDICTED: flavanone 3-dioxygenase-like	Sesamum indicum	NA	NA	NA	NA	NA
TR44018|c4_g1_i6	41.3842	225.883	2.44843	0.00318865	0.30873	No	NA	NA	NA	NA	NA	NA	NA
TR39085|c0_g1_i1	23.9593	130.388	2.44415	0.00511475	0.393858	No	NA	NA	NA	NA	NA	NA	NA
TR43800|c2_g8_i5	43.5623	236.902	2.44314	0.0030603	0.304705	No	PREDICTED: dihydrolipoyllysine-residue acetyltransferase component 5 of pyruvate dehydrogenase complex, chloroplastic	Sesamum indicum	NA	NA	NA	NA	NA
TR38613|c0_g2_i1	19.603	106.514	2.4419	0.00553997	0.412141	No	PREDICTED: fibrous sheath CABYR-binding protein	Sesamum indicum	NA	NA	NA	NA	NA
TR2614|c0_g1_i6	34.8498	189.154	2.44034	0.00396892	0.346105	No	hypothetical protein MIMGU_mgv1a019554mg, partial	Mimulus guttatus	NA	protein phosphorylation[GO:0006468]	ATP binding[GO:0005524] ; protein serine/threonine kinase activity[GO:0004674]	NA	NA
TR18376|c0_g1_i2	178.605	964.136	2.43246	0.000583182	0.119987	No	NA	NA	NA	NA	NA	NA	NA
TR2313|c0_g1_i2	69.6997	372.799	2.41918	0.00184068	0.234746	No	hypothetical protein MIMGU_mgv1a019378mg	Mimulus guttatus	NA	NA	NA	NA	NA
TR43235|c3_g1_i13	32.6717	174.463	2.4168	0.00457958	0.372239	No	PREDICTED: probable disease resistance protein At4g27220-like	Solanum tuberosum	NA	NA	NA	NA	NA
TR35743|c2_g1_i2	56.631	301.178	2.41095	0.00251686	0.276179	No	PREDICTED: uncharacterized protein LOC105169314	Sesamum indicum	NA	NA	NA	NA	NA
TR34401|c0_g5_i1	1413.6	7507.41	2.40894	0.00336796	0.320206	No	PREDICTED: uncharacterized protein LOC105165595	Sesamum indicum	NA	NA	NA	NA	NA
TR40758|c0_g2_i2	37.028	196.5	2.40784	0.00424491	0.357163	No	hypothetical protein MIMGU_mgv1a018561mg, partial	Mimulus guttatus	NA	NA	nucleic acid binding[GO:0003676] ; nucleotide binding[GO:0000166]	NA	NA
TR34800|c0_g1_i7	307.114	1627.09	2.40545	0.000590944	0.120642	No	PREDICTED: glucan endo-1,3-beta-glucosidase, acidic isoform PR-Q'-like	Sesamum indicum	NA	NA	NA	NA	NA
TR29230|c0_g1_i1	217.812	1153.29	2.4046	0.000608675	0.121899	No	NA	NA	NA	NA	NA	NA	NA
TR38920|c1_g10_i16	47.9185	253.43	2.40293	0.00321874	0.311072	No	PREDICTED: uncharacterized protein LOC105166164	Sesamum indicum	NA	NA	NA	NA	NA
TR33439|c0_g13_i3	3622.21	19148.7	2.4023	0.0181064	0.650978	No	chloroplast LHCII type I chlorophyll a-b binding precursor protein	Ipomoea nil	NA	photosynthesis, light harvesting[GO:0009765] ; protein-chromophore linkage[GO:0018298]	chlorophyll binding[GO:0016168]	photosystem II[GO:0009523] ; integral component of membrane[GO:0016021] ; chloroplast[GO:0009507]	NA
TR36400|c0_g1_i6	76.234	402.183	2.39934	0.00177209	0.231608	No	unnamed protein product	Coffea canephora	NA	NA	NA	membrane[GO:0016020]	NA
TR34800|c0_g1_i13	250.483	1318.57	2.39619	0.000612855	0.12181	No	beta-1,3-glucanase	Olea europaea	NA	NA	hydrolase activity[GO:0016787]	NA	NA
TR3037|c0_g1_i1	71.8778	378.309	2.39595	0.00196494	0.242947	No	NA	NA	NA	NA	NA	NA	NA
TR40759|c2_g1_i1	598.982	3149.51	2.39454	0.00098741	0.165104	No	PREDICTED: beta-D-xylosidase 1	Sesamum indicum	NA	NA	NA	NA	NA
TR31989|c0_g1_i1	76.234	400.346	2.39274	0.00182951	0.23503	No	unnamed protein product	Coffea canephora	NA	organic substance metabolic process[GO:0071704]	hydrolase activity, hydrolyzing O-glycosyl compounds[GO:0004553]	NA	NA
TR34401|c0_g5_i7	1548.64	8107.93	2.38833	0.00414768	0.354647	No	PREDICTED: uncharacterized protein LOC105165595	Sesamum indicum	NA	NA	NA	NA	NA
TR29212|c0_g7_i1	10.8906	56.93	2.38611	0.00449221	0.369701	No	NA	NA	NA	NA	NA	NA	NA
TR7127|c0_g1_i1	30.4936	157.935	2.37275	0.00563686	0.415825	No	PREDICTED: 36.4 kDa proline-rich protein	Pyrus x bretschneideri	NA	NA	NA	NA	NA
TR32977|c0_g2_i1	17.4249	89.9861	2.36855	0.00683214	0.46493	No	PREDICTED: proteasome subunit alpha type-2-A	Sesamum indicum	NA	NA	NA	NA	NA
TR1181|c0_g2_i2	37.028	190.991	2.36682	0.00496996	0.387812	No	putative chloroplast chlorophyll A-B binding protein type I	Sorghum bicolor	NA	photosynthesis, light harvesting[GO:0009765] ; protein-chromophore linkage[GO:0018298]	chlorophyll binding[GO:0016168]	photosystem II[GO:0009523] ; integral component of membrane[GO:0016021] ; chloroplast[GO:0009507]	NA
TR3863|c0_g1_i4	19.603	101.005	2.36527	0.00699703	0.467691	No	hypothetical protein MIMGU_mgv1a015081mg	Mimulus guttatus	NA	NA	calcium ion binding[GO:0005509]	NA	NA
TR30524|c0_g1_i2	63.1653	325.052	2.36346	0.0027188	0.284131	No	PREDICTED: bidirectional sugar transporter SWEET3b	Sesamum indicum	NA	NA	NA	NA	NA
TR35232|c0_g2_i5	63.1653	325.052	2.36346	0.0027188	0.284696	No	PREDICTED: beta-amyrin 28-oxidase-like	Sesamum indicum	NA	NA	NA	NA	NA
TR40403|c0_g2_i4	261.374	1340.61	2.3587	0.000730341	0.134034	No	PREDICTED: glycosylphosphatidylinositol anchor attachment 1 protein	Sesamum indicum	NA	NA	NA	NA	NA
TR3880|c0_g2_i1	26.1374	134.061	2.3587	0.00652013	0.451277	No	NA	NA	NA	NA	NA	NA	NA
TR34800|c0_g1_i2	206.921	1059.63	2.35641	0.000788375	0.139813	No	beta-1,3-glucanase	Olea europaea	NA	NA	hydrolase activity[GO:0016787]	NA	NA
TR36101|c0_g1_i10	416.02	2126.61	2.35383	0.000851668	0.147076	No	PREDICTED: uncharacterized protein LOC105158378	Sesamum indicum	NA	NA	NA	NA	NA
TR38058|c0_g2_i3	34.8498	178.136	2.35375	0.00549401	0.412215	No	NA	NA	NA	NA	NA	NA	NA
TR2620|c2_g2_i1	243.949	1245.11	2.35163	0.000763887	0.136389	No	NA	NA	NA	NA	NA	NA	NA
TR39149|c2_g2_i2	76.234	385.655	2.3388	0.00236517	0.267905	No	PREDICTED: uncharacterized protein LOC106448030	Brassica napus	NA	NA	NA	NA	NA
TR32975|c0_g1_i4	30.4936	154.262	2.3388	0.00635536	0.444546	No	PREDICTED: cytochrome b-c1 complex subunit Rieske, mitochondrial	Vitis vinifera	NA	oxidation-reduction process[GO:0055114] ; hydrogen ion transmembrane transport[GO:1902600]	ubiquinol-cytochrome-c reductase activity[GO:0008121] ; 2 iron, 2 sulfur cluster binding[GO:0051537] ; metal ion binding[GO:0046872]	integral component of membrane[GO:0016021] ; mitochondrial inner membrane[GO:0005743] ; respiratory chain[GO:0070469]	map00190:Oxidative phosphorylation(reductase[ec:1.10.2.2])
TR33258|c1_g4_i8	23.9593	121.206	2.3388	0.00726232	0.475763	No	PREDICTED: heptahelical transmembrane protein 2-like	Sesamum indicum	NA	NA	NA	NA	NA
TR30741|c0_g8_i2	755.806	3814.31	2.33533	0.00160763	0.22283	No	chlorophyll a/b-binding protein	Tagetes erecta	NA	photosynthesis, light harvesting[GO:0009765] ; protein-chromophore linkage[GO:0018298]	metal ion binding[GO:0046872] ; chlorophyll binding[GO:0016168]	photosystem II[GO:0009523] ; integral component of membrane[GO:0016021] ; chloroplast[GO:0009507] ; photosystem I[GO:0009522]	NA
TR37650|c2_g1_i16	154.646	776.818	2.32861	0.00108901	0.179248	No	hypothetical protein B456_006G095700, partial	Gossypium raimondii	NA	NA	NA	NA	NA
TR2497|c0_g3_i3	520.57	2611.43	2.32668	0.00112492	0.182873	No	lipid transfer protein 2	Salvia miltiorrhiza	NA	lipid transport[GO:0006869]	lipid binding[GO:0008289]	NA	NA
TR42640|c0_g2_i1	76.234	381.982	2.325	0.00252317	0.275722	No	NA	NA	NA	NA	NA	NA	NA
TR34142|c0_g11_i1	58.8091	293.832	2.32088	0.00355797	0.329933	No	PREDICTED: major allergen Pru ar 1-like	Sesamum indicum	NA	NA	NA	NA	NA
TR36400|c0_g1_i3	139.399	696.015	2.31989	0.00124232	0.196498	No	PREDICTED: beta-glucosidase 11-like isoform X2	Nicotiana tomentosiformis	NA	NA	NA	NA	NA
TR41094|c1_g5_i3	50.0967	249.757	2.31774	0.00436085	0.36286	No	PREDICTED: probable receptor-like protein kinase At5g39020	Prunus mume	NA	NA	NA	NA	NA
TR43165|c4_g4_i6	23.9593	119.369	2.31678	0.00779881	0.487852	No	CYP450 monooxygenase CYP93B23	Ocimum basilicum	Lamiaceae	oxidation-reduction process[GO:0055114]	heme binding[GO:0020037] ; oxidoreductase activity, acting on paired donors, with incorporation or reduction of molecular oxygen[GO:0016705] ; monooxygenase activity[GO:0004497] ; iron ion binding[GO:0005506]	NA	NA
TR37323|c1_g1_i2	93.659	464.622	2.31057	0.00202332	0.245554	No	PREDICTED: cinnamoyl-CoA reductase 1-like	Sesamum indicum	NA	NA	NA	NA	NA
TR35948|c0_g1_i4	111.084	550.935	2.31023	0.00163267	0.222784	No	tyrosine aminotransferase 2	Salvia miltiorrhiza	NA	cellular amino acid metabolic process[GO:0006520] ; biosynthetic process[GO:0009058]	pyridoxal phosphate binding[GO:0030170] ; transaminase activity[GO:0008483]	NA	NA
TR43678|c1_g3_i1	111.084	550.935	2.31023	0.00163267	0.223362	No	hypothetical protein MIMGU_mgv1a003108mg	Mimulus guttatus	NA	regulation of transcription, DNA-templated[GO:0006355]	double-stranded DNA binding[GO:0003690]	mitochondrion[GO:0005739]	NA
TR29230|c0_g1_i4	612.05	3030.14	2.30766	0.00140637	0.21104	No	NA	NA	NA	NA	NA	NA	NA
TR34371|c2_g1_i2	503.145	2488.39	2.30617	0.00118844	0.191426	No	PREDICTED: uncharacterized protein LOC105165426	Sesamum indicum	NA	NA	NA	NA	NA
TR29778|c0_g2_i1	15.2468	75.2945	2.30404	0.00778409	0.48751	No	unnamed protein product	Coffea canephora	NA	regulation of transcription, DNA-templated[GO:0006355] ; transcription, DNA-templated[GO:0006351]	transcription factor activity, transcription factor binding[GO:0000989]	nucleus[GO:0005634]	NA
TR39035|c0_g1_i2	3824.77	18862.2	2.30205	0.0228781	0.707999	No	hypothetical protein MIMGU_mgv1a005412mg	Mimulus guttatus	NA	proteolysis[GO:0006508]	peptidase activity[GO:0008233]	NA	NA
TR43971|c0_g1_i2	150.29	740.089	2.29995	0.00128396	0.198905	No	PREDICTED: CSC1-like protein ERD4	Sesamum indicum	NA	NA	NA	NA	NA
TR22662|c1_g3_i4	23.9593	117.533	2.29441	0.00837824	0.502608	No	NA	NA	NA	NA	NA	NA	NA
TR35948|c0_g1_i3	98.0152	479.313	2.28989	0.00210358	0.250673	No	tyrosine aminotransferase 2	Salvia miltiorrhiza	NA	cellular amino acid metabolic process[GO:0006520] ; biosynthetic process[GO:0009058]	pyridoxal phosphate binding[GO:0030170] ; transaminase activity[GO:0008483]	NA	NA
TR34192|c0_g1_i1	21.7812	106.514	2.28989	0.00870396	0.510519	No	PREDICTED: protein YLS9	Sesamum indicum	NA	NA	NA	NA	NA
TR42550|c0_g7_i1	21.7812	106.514	2.28989	0.00870396	0.509951	No	PREDICTED: pentatricopeptide repeat-containing protein At5g25630	Sesamum indicum	NA	NA	NA	NA	NA
TR38920|c1_g10_i19	50.0967	244.248	2.28556	0.00497824	0.387883	No	NA	NA	NA	NA	NA	NA	NA
TR12883|c0_g1_i1	19.603	95.4954	2.28435	0.00887502	0.514253	No	lipid transfer protein 2	Salvia miltiorrhiza	NA	lipid transport[GO:0006869]	lipid binding[GO:0008289]	NA	NA
TR35053|c1_g2_i2	82.7684	402.183	2.2807	0.00276902	0.285975	No	hypothetical protein CICLE_v10019846mg	Citrus clementina	NA	NA	ATP binding[GO:0005524]	integral component of membrane[GO:0016021]	NA
TR2461|c1_g2_i10	80.5903	391.164	2.2791	0.00289354	0.294788	No	hypothetical protein CISIN_1g039044mg, partial	Citrus sinensis	NA	NA	NA	NA	NA
TR43270|c0_g6_i1	121.974	591.337	2.2774	0.00173572	0.228555	No	PREDICTED: primary amine oxidase-like	Sesamum indicum	NA	NA	NA	NA	NA
TR36243|c0_g3_i1	17.4249	84.4767	2.2774	0.00882739	0.514323	No	NA	NA	NA	NA	NA	NA	NA
TR35948|c0_g1_i2	58.8091	284.65	2.27508	0.00432248	0.363109	No	tyrosine aminotransferase 2	Salvia miltiorrhiza	NA	cellular amino acid metabolic process[GO:0006520] ; biosynthetic process[GO:0009058]	pyridoxal phosphate binding[GO:0030170] ; transaminase activity[GO:0008483]	NA	NA
TR3908|c0_g2_i6	564.132	2727.13	2.27328	0.00148912	0.216667	No	PREDICTED: floral homeotic protein AGAMOUS-like	Sesamum indicum	NA	NA	NA	NA	NA
TR30276|c0_g2_i1	65.3435	315.869	2.27321	0.00387413	0.342948	No	hypothetical protein CICLE_v10014684mg	Citrus clementina	NA	NA	NA	integral component of membrane[GO:0016021]	NA
TR41296|c1_g2_i3	32.6717	157.935	2.27321	0.00764496	0.486314	No	NA	NA	NA	NA	NA	NA	NA
TR27695|c1_g1_i1	23.9593	115.696	2.27169	0.00900433	0.50778	No	PREDICTED: uncharacterized protein LOC105167116	Sesamum indicum	NA	NA	NA	NA	NA
TR41245|c0_g5_i1	23.9593	115.696	2.27169	0.00900433	0.508325	No	PREDICTED: LOW QUALITY PROTEIN: glutamine--tRNA ligase-like	Sesamum indicum	NA	NA	NA	NA	NA
TR41962|c1_g3_i1	23.9593	115.696	2.27169	0.00900433	0.50887	No	NA	NA	NA	NA	NA	NA	NA
TR7544|c0_g1_i1	78.4121	378.309	2.27041	0.00312524	0.308258	No	NA	NA	NA	NA	NA	NA	NA
TR44659|c0_g1_i4	54.4529	262.612	2.26985	0.00482582	0.383959	No	PREDICTED: small subunit processome component 20 homolog isoform X3	Sesamum indicum	NA	NA	NA	NA	NA
TR29549|c1_g1_i1	69.6997	336.07	2.26954	0.00364961	0.332575	No	PREDICTED: probable WRKY transcription factor 50	Sesamum indicum	NA	NA	NA	NA	NA
TR40759|c2_g1_i2	298.402	1437.94	2.26868	0.00111	0.181006	No	PREDICTED: beta-D-xylosidase 1	Sesamum indicum	NA	NA	NA	NA	NA
TR43678|c1_g3_i2	30.4936	146.916	2.26841	0.0081111	0.491622	No	hypothetical protein M569_13638, partial	Genlisea aurea	NA	NA	NA	NA	NA
TR39189|c0_g6_i1	15.2468	73.458	2.26841	0.00855385	0.505656	No	PREDICTED: 3-ketoacyl-CoA synthase 6-like	Sesamum indicum	NA	NA	NA	NA	NA
TR13374|c0_g1_i1	15.2468	73.458	2.26841	0.00855385	0.506225	No	hypothetical protein MIMGU_mgv1a013178mg	Mimulus guttatus	NA	NA	NA	NA	NA
TR39035|c0_g1_i7	1023.71	4923.52	2.26588	0.00301777	0.30276	No	unnamed protein product	Coffea canephora	NA	proteolysis[GO:0006508]	peptidase activity[GO:0008233]	NA	NA
TR38320|c0_g1_i1	19.603	93.659	2.25634	0.00961683	0.516865	No	NA	NA	NA	NA	NA	NA	NA
TR40736|c0_g1_i1	13.0687	62.4393	2.25634	0.00776947	0.48892	No	PREDICTED: zinc finger CCCH domain-containing protein 33 isoform X4	Sesamum indicum	NA	NA	NA	NA	NA
TR39997|c3_g4_i2	121.974	582.155	2.25482	0.00193463	0.240328	No	NA	NA	NA	NA	NA	NA	NA
TR37126|c0_g1_i4	115.44	550.935	2.25474	0.00204648	0.246659	No	PREDICTED: probable isoaspartyl peptidase/L-asparaginase 2-like	Solanum tuberosum	NA	metabolic process[GO:0008152]	asparaginase activity[GO:0004067]	NA	map00250:Alanine, aspartate and glutamate metabolism(asparaginase II[ec:3.5.1.1]) ; map00460:Cyanoamino acid metabolism(asparaginase II[ec:3.5.1.1])
TR36283|c0_g8_i1	163.359	778.655	2.25294	0.00151226	0.218225	No	hypothetical protein EUGRSUZ_I02449	Eucalyptus grandis	NA	NA	NA	NA	NA
TR33824|c0_g2_i2	119.796	569.3	2.2486	0.00202893	0.245668	No	DAG_ANTMARecName: Full=DAG protein, chloroplastic; Flags: Precursor	Antirrhinum majus	NA	NA	NA	chloroplast[GO:0009507]	NA
TR42765|c7_g7_i1	23.9593	113.86	2.2486	0.00968114	0.518207	No	PREDICTED: probable LRR receptor-like serine/threonine-protein kinase At3g47570	Erythranthe guttatus	NA	NA	NA	NA	NA
TR1309|c0_g1_i1	17.4249	82.6403	2.24569	0.00963623	0.51738	No	hypothetical protein M569_12626, partial	Genlisea aurea	NA	(1->3)-beta-D-glucan biosynthetic process[GO:0006075]	1,3-beta-D-glucan synthase activity[GO:0003843]	1,3-beta-D-glucan synthase complex[GO:0000148]	map00500:Starch and sucrose metabolism(synthase[ec:2.4.1.34])
TR44018|c4_g1_i1	63.1653	299.341	2.24459	0.00453823	0.372326	No	hypothetical protein EUGRSUZ_E00733, partial	Eucalyptus grandis	NA	NA	NA	NA	NA
TR2184|c0_g4_i10	113.262	536.243	2.24322	0.00220729	0.258932	No	NA	NA	NA	NA	NA	NA	NA
TR39848|c0_g7_i1	28.3155	134.061	2.24322	0.00920172	0.50697	No	S-adenosylmethionine synthetase, partial	Populus trichocarpa	NA	S-adenosylmethionine biosynthetic process[GO:0006556]	methionine adenosyltransferase activity[GO:0004478] ; ATP binding[GO:0005524]	NA	map00270:Cysteine and methionine metabolism(adenosyltransferase[ec:2.5.1.6])
TR3241|c1_g3_i4	104.55	494.005	2.24034	0.00245788	0.274278	No	hypothetical protein MIMGU_mgv1a023263mg	Mimulus guttatus	NA	NA	NA	NA	NA
TR36757|c1_g1_i1	32.6717	154.262	2.23927	0.00859683	0.507628	No	hypothetical protein MIMGU_mgv1a011374mg	Mimulus guttatus	NA	NA	NA	NA	NA
TR41396|c0_g1_i11	32.6717	154.262	2.23927	0.00859683	0.507059	No	PREDICTED: vegetative cell wall protein gp1-like	Sesamum indicum	NA	NA	NA	NA	NA
TR1613|c0_g1_i1	37.028	174.463	2.23623	0.00802904	0.488335	No	NA	NA	NA	NA	NA	NA	NA
TR28434|c0_g2_i1	198.208	932.917	2.23473	0.00145707	0.214974	No	hypothetical protein CICLE_v10022542mg	Citrus clementina	NA	response to stress[GO:0006950]	NA	NA	NA
TR41396|c0_g1_i4	56.631	266.285	2.23331	0.0053675	0.405612	No	PREDICTED: vegetative cell wall protein gp1-like	Sesamum indicum	NA	NA	NA	NA	NA
TR33279|c0_g1_i1	174.249	819.057	2.23281	0.00159167	0.2212	No	PREDICTED: carboxyl-terminal-processing peptidase 3, chloroplastic	Sesamum indicum	NA	NA	NA	NA	NA
TR39149|c2_g2_i3	76.234	358.108	2.23189	0.00385812	0.342683	No	NA	NA	NA	NA	NA	NA	NA
TR38890|c0_g4_i2	30.4936	143.243	2.23189	0.00918161	0.506392	No	PREDICTED: myb family transcription factor APL isoform X3	Sesamum indicum	NA	NA	NA	NA	NA
TR1203|c0_g1_i1	15.2468	71.6216	2.23189	0.00941099	0.512072	No	NA	NA	NA	NA	NA	NA	NA
TR34270|c2_g5_i1	169.893	797.019	2.22999	0.0016421	0.223491	No	NA	NA	NA	NA	NA	NA	NA
TR2474|c0_g1_i1	34.8498	163.444	2.22957	0.00854337	0.506173	No	PREDICTED: uncharacterized protein LOC104211068	Nicotiana sylvestris	NA	NA	NA	NA	NA
TR31283|c0_g6_i1	128.509	602.356	2.22875	0.00208352	0.249979	No	NA	NA	NA	NA	NA	NA	NA
TR25992|c0_g4_i1	39.2061	183.645	2.22777	0.00793359	0.487028	No	gibberellin 2 oxidase 1	Camellia lipoensis	NA	NA	NA	NA	NA
TR39727|c3_g1_i1	19.603	91.8225	2.22777	0.0104263	0.536819	No	PREDICTED: serine/threonine-protein kinase BRI1-like 2	Erythranthe guttatus	NA	NA	NA	NA	NA
TR33279|c0_g1_i2	167.715	784.164	2.22515	0.00169637	0.226776	No	PREDICTED: carboxyl-terminal-processing peptidase 3, chloroplastic	Sesamum indicum	NA	NA	NA	NA	NA
TR30075|c1_g1_i1	784.121	3663.72	2.22416	0.00247916	0.275485	No	hypothetical protein MIMGU_mgv1a004505mg	Mimulus guttatus	NA	NA	metal ion binding[GO:0046872] ; oxidoreductase activity[GO:0016491]	NA	NA
TR35319|c3_g2_i2	56.631	264.449	2.22332	0.00559191	0.414833	No	cytochrome P450 CYP71D410	Salvia miltiorrhiza	NA	oxidation-reduction process[GO:0055114]	heme binding[GO:0020037] ; oxidoreductase activity, acting on paired donors, with incorporation or reduction of molecular oxygen[GO:0016705] ; monooxygenase activity[GO:0004497] ; iron ion binding[GO:0005506]	NA	NA
TR23607|c0_g1_i1	56.631	262.612	2.21327	0.00582633	0.423281	No	hypothetical protein MIMGU_mgv1a011768mg	Mimulus guttatus	NA	carbohydrate metabolic process[GO:0005975] ; chitin catabolic process[GO:0006032] ; cell wall macromolecule catabolic process[GO:0016998]	chitinase activity[GO:0004568] ; chitin binding[GO:0008061]	NA	map00520:Amino sugar and nucleotide sugar metabolism(chitodextrinase[ec:3.2.1.14])
TR7951|c0_g4_i2	47.9185	222.21	2.21327	0.00696994	0.469455	No	NA	NA	NA	NA	NA	NA	NA
TR42776|c0_g7_i1	34.8498	161.608	2.21327	0.00903821	0.50806	No	NA	NA	NA	NA	NA	NA	NA
TR28929|c1_g1_i1	17.4249	80.8038	2.21327	0.0105313	0.538537	No	NA	NA	NA	NA	NA	NA	NA
TR42671|c0_g8_i3	17.4249	80.8038	2.21327	0.0105313	0.538014	No	PREDICTED: methionine--tRNA ligase, mitochondrial	Sesamum indicum	NA	NA	NA	NA	NA
TR7816|c0_g1_i5	63.1653	291.996	2.20874	0.00527059	0.401747	No	NA	NA	NA	NA	NA	NA	NA
TR3941|c2_g1_i7	37.028	170.79	2.20554	0.00894437	0.514873	No	PREDICTED: glycine-rich RNA-binding protein 4, mitochondrial	Sesamum indicum	NA	NA	NA	NA	NA
TR2461|c1_g2_i8	100.193	460.949	2.20182	0.00310975	0.307305	No	NA	NA	NA	NA	NA	NA	NA
TR40831|c0_g3_i1	56.631	258.939	2.19295	0.00632705	0.443744	No	PREDICTED: zinc finger CCCH domain-containing protein 29-like	Sesamum indicum	NA	NA	NA	NA	NA
TR33263|c0_g1_i3	26.1374	119.369	2.19124	0.0112724	0.552821	No	NA	NA	NA	NA	NA	NA	NA
TR33924|c3_g9_i1	37.028	168.953	2.18994	0.00944227	0.512187	No	PREDICTED: 50S ribosomal protein L5, chloroplastic	Sesamum indicum	NA	NA	NA	NA	NA
TR3135|c0_g2_i1	47.9185	218.538	2.18923	0.00764916	0.485409	No	NA	NA	NA	NA	NA	NA	NA
TR36609|c2_g2_i1	156.824	714.379	2.18754	0.00213506	0.253278	No	PREDICTED: non-specific lipid-transfer protein 2-like	Sesamum indicum	NA	lipid transport[GO:0006869]	lipid binding[GO:0008289]	NA	NA
TR34091|c4_g1_i2	359.389	1636.28	2.1868	0.00164622	0.223474	No	PREDICTED: probable WRKY transcription factor 40	Sesamum indicum	NA	NA	NA	NA	NA
TR43421|c0_g2_i3	28.3155	128.552	2.18268	0.0112169	0.551126	No	PREDICTED: LOW QUALITY PROTEIN: protein tesmin/TSO1-like CXC 2	Sesamum indicum	NA	NA	NA	NA	NA
TR31725|c0_g1_i1	405.129	1829.1	2.17468	0.00180363	0.234565	No	PREDICTED: glucan endo-1,3-beta-glucosidase-like	Sesamum indicum	NA	NA	NA	NA	NA
TR36528|c0_g1_i1	270.086	1219.4	2.17468	0.00172748	0.228613	No	cytochrome P450 CYP92A73	Salvia miltiorrhiza	NA	oxidation-reduction process[GO:0055114]	heme binding[GO:0020037] ; oxidoreductase activity, acting on paired donors, with incorporation or reduction of molecular oxygen[GO:0016705] ; monooxygenase activity[GO:0004497] ; iron ion binding[GO:0005506]	NA	NA
TR3709|c1_g4_i1	56.631	255.267	2.17234	0.00687365	0.465949	No	PREDICTED: probable (S)-N-methylcoclaurine 3'-hydroxylase isozyme 2	Sesamum indicum	NA	NA	NA	NA	NA
TR32399|c0_g1_i1	228.702	1030.25	2.17145	0.00184035	0.235274	No	PREDICTED: probable carboxylesterase 12	Sesamum indicum	NA	NA	NA	NA	NA
TR41664|c1_g5_i1	19.603	88.1496	2.16888	0.0122902	0.568337	No	hypothetical protein B456_006G038700	Gossypium raimondii	NA	glucose metabolic process[GO:0006006] ; pentose-phosphate shunt[GO:0006098] ; oxidation-reduction process[GO:0055114]	NADP binding[GO:0050661] ; glucose-6-phosphate dehydrogenase activity[GO:0004345]	NA	map00480:Glutathione metabolism(dehydrogenase (NADP+)[ec:1.1.1.49]) ; map00030:Pentose phosphate pathway(dehydrogenase (NADP+)[ec:1.1.1.49]) ; map01130:Biosynthesis of antibiotics(dehydrogenase (NADP+)[ec:1.1.1.49])
TR38595|c0_g1_i1	13.0687	58.7664	2.16888	0.00953677	0.51572	No	hypothetical protein MIMGU_mgv1a012466mg	Mimulus guttatus	NA	NA	zinc ion binding[GO:0008270]	NA	NA
TR2597|c0_g1_i3	13.0687	58.7664	2.16888	0.00953677	0.515191	No	NA	NA	NA	NA	NA	NA	NA
TR42204|c1_g6_i1	230.88	1035.76	2.16547	0.00188568	0.238751	No	PREDICTED: amino acid permease 4-like isoform X2	Musa acuminata subsp. malaccensis	NA	NA	NA	NA	NA
TR40403|c0_g2_i7	280.977	1259.8	2.16468	0.00179751	0.234348	No	PREDICTED: glycosylphosphatidylinositol anchor attachment 1 protein	Sesamum indicum	NA	NA	NA	NA	NA
TR51836|c0_g1_i1	28.3155	126.715	2.16192	0.0119909	0.562399	No	PREDICTED: PRA1 family protein B3	Sesamum indicum	NA	NA	NA	NA	NA
TR40069|c0_g2_i1	30.4936	135.897	2.15594	0.0118126	0.55701	No	PREDICTED: rhodanese-like domain-containing protein 8, chloroplastic	Sesamum indicum	NA	NA	NA	NA	NA
TR41602|c0_g2_i1	30.4936	135.897	2.15594	0.0118126	0.557509	No	BnaA03g32860D	Brassica napus	NA	tRNA aminoacylation for protein translation[GO:0006418]	aminoacyl-tRNA ligase activity[GO:0004812] ; ATP binding[GO:0005524]	NA	NA
TR43183|c2_g9_i1	15.2468	67.9487	2.15594	0.0114342	0.556097	No	PREDICTED: F-box/LRR-repeat protein 14	Sesamum indicum	NA	NA	NA	NA	NA
TR40434|c0_g2_i5	15.2468	67.9487	2.15594	0.0114342	0.556611	No	NA	NA	NA	NA	NA	NA	NA
TR42231|c0_g4_i1	15.2468	67.9487	2.15594	0.0114342	0.557125	No	PREDICTED: cell division protein FtsZ homolog 1, chloroplastic isoform X1	Sesamum indicum	NA	NA	NA	NA	NA
TR31966|c0_g1_i1	78.4121	348.926	2.15377	0.00525142	0.401448	No	hypothetical protein MIMGU_mgv1a010248mg	Mimulus guttatus	NA	metabolic process[GO:0008152]	molybdenum ion binding[GO:0030151] ; pyridoxal phosphate binding[GO:0030170] ; catalytic activity[GO:0003824]	NA	NA
TR44439|c0_g1_i1	102.371	455.44	2.15345	0.00379104	0.338437	No	PREDICTED: alpha-glucan water dikinase, chloroplastic	Pyrus x bretschneideri	NA	NA	NA	NA	NA
TR44572|c2_g4_i6	23.9593	106.514	2.15239	0.0129915	0.581372	No	hypothetical protein MIMGU_mgv1a001054mg	Mimulus guttatus	NA	carbohydrate metabolic process[GO:0005975]	carbohydrate binding[GO:0030246] ; hydrolase activity, hydrolyzing O-glycosyl compounds[GO:0004553]	NA	NA
TR32995|c0_g1_i6	130.687	580.318	2.15073	0.00295991	0.298662	No	PREDICTED: protein CURVATURE THYLAKOID 1A, chloroplastic-like	Sesamum indicum	NA	NA	NA	NA	NA
TR3863|c0_g1_i2	50.0967	222.21	2.14914	0.0085377	0.506407	No	hypothetical protein MIMGU_mgv1a015081mg	Mimulus guttatus	NA	NA	calcium ion binding[GO:0005509]	NA	NA
TR39997|c3_g4_i4	117.618	521.552	2.1487	0.00330634	0.316634	No	cytochrome P450 CYP92B28	Salvia miltiorrhiza	NA	NA	metal ion binding[GO:0046872] ; oxidoreductase activity[GO:0016491]	NA	NA
TR44439|c0_g2_i1	7431.73	32916.5	2.14704	0.0761326	1.01007	No	PREDICTED: alpha-glucan water dikinase, chloroplastic-like	Sesamum indicum	NA	NA	NA	NA	NA
TR31449|c0_g1_i7	26.1374	115.696	2.14616	0.0129751	0.581627	No	neomenthol dehydrogenase	Mentha x piperita	NA	NA	NA	NA	NA
TR29491|c1_g1_i1	111.084	490.332	2.14211	0.00362861	0.332387	No	PREDICTED: probable carboxylesterase 15 isoform X1	Sesamum indicum	NA	NA	NA	NA	NA
TR28365|c0_g1_i4	74.0559	326.888	2.14211	0.00588627	0.425873	No	PREDICTED: non-specific lipid-transfer protein 2-like	Sesamum indicum	NA	transport[GO:0006810]	NA	NA	NA
TR30551|c2_g3_i2	28.3155	124.879	2.14086	0.012823	0.579244	No	NA	NA	NA	NA	NA	NA	NA
TR36817|c0_g1_i2	28.3155	124.879	2.14086	0.012823	0.579741	No	hypothetical protein MIMGU_mgv1a011016mg	Mimulus guttatus	NA	NA	NA	NA	NA
TR42204|c1_g2_i1	115.44	508.697	2.13966	0.0035169	0.328437	No	PREDICTED: uncharacterized protein LOC105155456	Sesamum indicum	NA	NA	NA	NA	NA
TR36678|c0_g1_i2	67.5216	297.505	2.13949	0.00653922	0.452005	No	PREDICTED: probable F-box protein At1g60180	Sesamum indicum	NA	NA	NA	NA	NA
TR20436|c0_g1_i1	30.4936	134.061	2.13631	0.0125912	0.573199	No	AF448811_1unknown	Davidia involucrata	NA	NA	NA	integral component of membrane[GO:0016021]	NA
TR36515|c0_g2_i4	63.1653	277.304	2.13426	0.00714441	0.470968	No	PREDICTED: uncharacterized protein LOC105967360	Erythranthe guttatus	NA	NA	NA	NA	NA
TR31595|c0_g1_i1	117.618	516.042	2.13338	0.00354896	0.329678	No	PREDICTED: glucan endo-1,3-beta-glucosidase-like	Sesamum indicum	NA	NA	NA	NA	NA
TR7520|c0_g1_i1	43.5623	190.991	2.13235	0.010301	0.53245	No	RL31_PERFRRecName: Full=60S ribosomal protein L31	Perilla frutescens	Lamiaceae	translation[GO:0006412]	structural constituent of ribosome[GO:0003735]	ribosome[GO:0005840]	NA
TR35131|c1_g5_i1	21.7812	95.4954	2.13235	0.013839	0.595031	No	hypothetical protein MIMGU_mgv1a009830mg	Mimulus guttatus	NA	NA	NA	NA	NA
TR3112|c0_g1_i5	21.7812	95.4954	2.13235	0.013839	0.595517	No	NA	NA	NA	NA	NA	NA	NA
TR36515|c0_g2_i7	182.962	800.692	2.12971	0.00251399	0.276439	No	PREDICTED: uncharacterized protein LOC105966291	Erythranthe guttatus	NA	NA	NA	NA	NA
TR2250|c2_g2_i5	47.9185	209.355	2.1273	0.00966908	0.518087	No	Sal m 1 allergen	Salvia miltiorrhiza	NA	response to biotic stimulus[GO:0009607] ; defense response[GO:0006952]	NA	NA	NA
TR22540|c0_g3_i3	23.9593	104.678	2.1273	0.0139981	0.592204	No	PREDICTED: LOB domain-containing protein 1	Sesamum indicum	NA	NA	NA	NA	NA
TR25059|c0_g1_i2	180.784	789.674	2.12699	0.00256567	0.278632	No	hypothetical protein MIMGU_mgv1a016979mg	Mimulus guttatus	NA	NA	NA	NA	NA
TR41094|c1_g5_i24	50.0967	218.538	2.1251	0.00935463	0.511649	No	PREDICTED: probable receptor-like protein kinase At1g67000	Prunus mume	NA	NA	NA	NA	NA
TR7941|c1_g1_i2	117.618	512.37	2.12307	0.00372133	0.335053	No	hypothetical protein MIMGU_mgv1a023022mg, partial	Mimulus guttatus	NA	ion transmembrane transport[GO:0034220]	ion channel activity[GO:0005216]	integral component of membrane[GO:0016021]	NA
TR39887|c0_g1_i1	39.2061	170.79	2.12307	0.0114734	0.557489	No	NA	NA	NA	NA	NA	NA	NA
TR3435|c2_g2_i1	26.1374	113.86	2.12307	0.0139289	0.595978	No	hypothetical protein MIMGU_mgv1a026895mg	Mimulus guttatus	NA	NA	NA	NA	NA
TR38113|c1_g2_i1	13.0687	56.93	2.12307	0.0105892	0.534748	No	PREDICTED: putative quinone-oxidoreductase homolog, chloroplastic	Prunus mume	NA	NA	NA	NA	NA
TR34720|c0_g3_i5	13.0687	56.93	2.12307	0.0105892	0.535261	No	NA	NA	NA	NA	NA	NA	NA
TR44531|c5_g10_i1	13.0687	56.93	2.12307	0.0105892	0.535775	No	PREDICTED: leucine-rich repeat receptor protein kinase EXS-like	Prunus mume	NA	NA	NA	NA	NA
TR35367|c1_g5_i2	54.4529	236.902	2.12121	0.00875282	0.511675	No	PREDICTED: probable WRKY transcription factor 70	Sesamum indicum	NA	NA	NA	NA	NA
TR38992|c0_g3_i1	54.4529	236.902	2.12121	0.00875282	0.512244	No	PREDICTED: NAC domain-containing protein 72-like	Sesamum indicum	NA	NA	NA	NA	NA
TR38338|c0_g3_i2	41.3842	179.972	2.12062	0.0111635	0.549524	No	hypothetical protein MIMGU_mgv1a009538mg	Mimulus guttatus	NA	NA	NA	NA	NA
TR31254|c1_g8_i2	41.3842	179.972	2.12062	0.0111635	0.550038	No	NA	NA	NA	NA	NA	NA	NA
TR43639|c0_g1_i1	28.3155	123.042	2.11949	0.0137178	0.592722	No	PREDICTED: U-box domain-containing protein 44	Sesamum indicum	NA	NA	NA	NA	NA
TR25277|c1_g3_i2	43.5623	189.154	2.11841	0.0108293	0.540656	No	PREDICTED: protein PF14_0175-like	Camelina sativa	NA	NA	NA	NA	NA
TR37412|c0_g3_i6	15.2468	66.1122	2.11641	0.0126284	0.574395	No	hypothetical protein MIMGU_mgv1a015990mg	Mimulus guttatus	NA	regulation of transcription, DNA-templated[GO:0006355]	sequence-specific DNA binding[GO:0043565] ; transcription factor activity, sequence-specific DNA binding[GO:0003700]	NA	NA
TR40380|c0_g1_i1	15.2468	66.1122	2.11641	0.0126284	0.5739	No	NA	NA	NA	NA	NA	NA	NA
TR34800|c0_g1_i5	78.4121	339.743	2.1153	0.0061893	0.436993	No	beta-1,3-glucanase	Olea europaea	NA	metabolic process[GO:0008152]	hydrolase activity, acting on glycosyl bonds[GO:0016798]	NA	NA
TR30409|c0_g1_i4	32.6717	141.407	2.11374	0.0130948	0.583022	No	NA	NA	NA	NA	NA	NA	NA
TR36609|c2_g2_i3	32.6717	141.407	2.11374	0.0130948	0.58253	No	lipid transfer protein 2	Salvia miltiorrhiza	NA	lipid transport[GO:0006869]	lipid binding[GO:0008289]	NA	NA
TR26943|c0_g1_i1	287.511	1239.6	2.10819	0.00231702	0.267045	No	cytochrome P450	Salvia miltiorrhiza	NA	NA	metal ion binding[GO:0046872] ; oxidoreductase activity[GO:0016491]	NA	NA
TR30451|c0_g2_i3	252.661	1089.01	2.10775	0.00238882	0.269425	No	PREDICTED: 14 kDa proline-rich protein DC2.15-like	Erythranthe guttatus	NA	NA	NA	NA	NA
TR41296|c1_g1_i3	39.2061	168.953	2.10748	0.0121003	0.565015	No	p-type H+-ATPase, partial	Vicia faba	NA	metabolic process[GO:0008152]	ATP binding[GO:0005524] ; hydrolase activity[GO:0016787]	integral component of membrane[GO:0016021]	NA
TR28729|c0_g2_i1	19.603	84.4767	2.10748	0.0145521	0.598809	No	late embryogenesis-like protein	Salvia miltiorrhiza	NA	response to desiccation[GO:0009269]	NA	NA	NA
TR32953|c1_g6_i2	19.603	84.4767	2.10748	0.0145521	0.597875	No	hypothetical protein MIMGU_mgv1a016563mg	Mimulus guttatus	NA	protein import into mitochondrial matrix[GO:0030150]	NA	mitochondrial inner membrane presequence translocase complex[GO:0005744]	NA
TR40793|c0_g1_i4	19.603	84.4767	2.10748	0.0145521	0.598342	No	PREDICTED: F-box/LRR-repeat protein 14	Sesamum indicum	NA	NA	NA	NA	NA
TR31624|c1_g1_i1	19.603	84.4767	2.10748	0.0145521	0.599277	No	NA	NA	NA	NA	NA	NA	NA
TR2669|c2_g1_i1	23.9593	102.841	2.10176	0.0150897	0.608101	No	lysine and histidine specific transporter family protein	Populus trichocarpa	NA	amino acid transmembrane transport[GO:0003333]	amino acid transmembrane transporter activity[GO:0015171]	plasma membrane[GO:0005886] ; integral component of membrane[GO:0016021]	NA
TR7941|c1_g1_i1	169.893	729.071	2.10143	0.00301257	0.302815	No	PREDICTED: cyclic nucleotide-gated ion channel 1-like	Sesamum indicum	NA	NA	NA	NA	NA
TR3618|c0_g1_i3	52.2748	224.047	2.09961	0.00989233	0.524184	No	hypothetical protein MIMGU_mgv1a014071mg	Mimulus guttatus	NA	NA	NA	membrane[GO:0016020]	NA
TR34515|c1_g1_i2	26.1374	112.023	2.09961	0.0149589	0.60701	No	PREDICTED: protein CutA, chloroplastic	Sesamum indicum	NA	NA	NA	NA	NA
TR40182|c1_g2_i7	26.1374	112.023	2.09961	0.0149589	0.606543	No	PREDICTED: uncharacterized protein LOC105160499	Sesamum indicum	NA	NA	NA	NA	NA
TR2495|c1_g1_i2	185.14	793.346	2.09934	0.00287367	0.293331	No	NA	NA	NA	NA	NA	NA	NA
TR33024|c0_g1_i7	106.728	457.276	2.09913	0.00462395	0.374114	No	PREDICTED: putative 12-oxophytodienoate reductase 11 isoform X1	Erythranthe guttatus	NA	NA	NA	NA	NA
TR44173|c0_g1_i2	261.374	1118.4	2.09725	0.0024824	0.275264	No	PREDICTED: protein PHYLLO, chloroplastic	Sesamum indicum	NA	NA	NA	NA	NA
TR40434|c0_g8_i2	30.4936	130.388	2.09623	0.0143205	0.599581	No	PREDICTED: uncharacterized protein LOC105175433	Sesamum indicum	NA	NA	NA	NA	NA
TR16518|c0_g2_i1	30.4936	130.388	2.09623	0.0143205	0.600058	No	12-oxophytodienoate reductase	Isodon eriocalyx	Lamiaceae	oxidation-reduction process[GO:0055114]	oxidoreductase activity[GO:0016491] ; FMN binding[GO:0010181]	NA	NA
TR41604|c1_g4_i5	69.6997	297.505	2.09369	0.00762855	0.487034	No	hypothetical protein MIMGU_mgv1a0017511mg, partial	Mimulus guttatus	NA	proteolysis[GO:0006508]	serine-type endopeptidase activity[GO:0004252]	NA	NA
TR36515|c0_g2_i2	141.577	604.192	2.09342	0.00359501	0.332198	No	NA	NA	NA	NA	NA	NA	NA
TR43064|c0_g2_i1	37.028	157.935	2.09264	0.0131305	0.582643	No	NA	NA	NA	NA	NA	NA	NA
TR19514|c0_g1_i1	189.496	808.038	2.09226	0.00292715	0.297637	No	PREDICTED: calcium-binding protein KIC-like	Sesamum indicum	NA	NA	NA	NA	NA
TR3241|c1_g3_i6	176.427	749.272	2.08641	0.00314662	0.309208	No	NA	NA	NA	NA	NA	NA	NA
TR4087|c0_g1_i6	60.9872	258.939	2.08604	0.00896293	0.512024	No	PREDICTED: cucumber peeling cupredoxin-like	Nelumbo nucifera	NA	NA	NA	NA	NA
TR3241|c1_g3_i1	219.99	932.917	2.08431	0.00280426	0.289047	No	PREDICTED: receptor-like protein 12	Erythranthe guttatus	NA	NA	NA	NA	NA
TR3908|c0_g2_i1	566.31	2398.4	2.08241	0.00314945	0.30891	No	PREDICTED: protein UXT homolog isoform X2	Sesamum indicum	NA	NA	NA	NA	NA
TR41876|c1_g1_i6	115.44	488.496	2.0812	0.00459457	0.372882	No	hypothetical protein SOVF_189280, partial	Spinacia oleracea	NA	NA	NA	NA	NA
TR41286|c1_g1_i2	537.994	2275.36	2.08043	0.00307299	0.304243	No	PREDICTED: probable LRR receptor-like serine/threonine-protein kinase At3g47570-like	Solanum tuberosum	NA	NA	NA	NA	NA
TR30975|c0_g1_i2	344.142	1454.47	2.07942	0.0026181	0.280281	No	NA	NA	NA	NA	NA	NA	NA
TR33180|c1_g1_i6	1054.21	4451.56	2.07815	0.00564056	0.415516	No	hypothetical protein MIMGU_mgv1a011637mg	Mimulus guttatus	NA	NA	NA	NA	NA
TR43655|c1_g9_i5	63.1653	266.285	2.07577	0.00901307	0.50773	No	PREDICTED: uncharacterized protein LOC105162464	Sesamum indicum	NA	NA	NA	NA	NA
TR40831|c0_g6_i1	56.631	238.739	2.07577	0.0100301	0.529887	No	PREDICTED: zinc finger CCCH domain-containing protein 29	Sesamum indicum	NA	NA	NA	NA	NA
TR39106|c1_g4_i9	39.2061	165.281	2.07577	0.0134639	0.589003	No	PREDICTED: protein phosphatase methylesterase 1-like	Nicotiana sylvestris	NA	NA	NA	NA	NA
TR7816|c0_g1_i1	34.8498	146.916	2.07577	0.0143394	0.599897	No	hypothetical protein B456_011G239300	Gossypium raimondii	NA	metabolic process[GO:0008152]	N-acetyltransferase activity[GO:0008080]	NA	NA
TR35412|c0_g4_i1	34.8498	146.916	2.07577	0.0143394	0.599421	No	PREDICTED: hypersensitive-induced response protein 2	Nicotiana tomentosiformis	NA	NA	NA	NA	NA
TR32703|c1_g1_i1	30.4936	128.552	2.07577	0.0152801	0.610635	No	hypothetical protein MIMGU_mgv1a011677mg	Mimulus guttatus	NA	metabolic process[GO:0008152]	hydrolase activity[GO:0016787]	NA	NA
TR38516|c3_g7_i2	28.3155	119.369	2.07577	0.0157164	0.616382	No	NA	NA	NA	NA	NA	NA	NA
TR3595|c1_g2_i2	26.1374	110.187	2.07577	0.0160717	0.621065	No	cytochrome P450 oxidoreductase	Ocimum basilicum	Lamiaceae	oxidation-reduction process[GO:0055114]	NADPH-hemoprotein reductase activity[GO:0003958] ; iron ion binding[GO:0005506] ; FMN binding[GO:0010181]	endoplasmic reticulum membrane[GO:0005789] ; integral component of membrane[GO:0016021]	NA
TR36393|c2_g1_i1	26.1374	110.187	2.07577	0.0160717	0.620609	No	NA	NA	NA	NA	NA	NA	NA
TR25960|c0_g1_i2	26.1374	110.187	2.07577	0.0160717	0.621521	No	PREDICTED: uncharacterized protein LOC105170588	Sesamum indicum	NA	NA	NA	NA	NA
TR33362|c0_g2_i1	23.9593	101.005	2.07577	0.016274	0.626586	No	BnaA06g05530D	Brassica napus	NA	nucleocytoplasmic transport[GO:0006913] ; intracellular protein transport[GO:0006886] ; metabolic process[GO:0008152] ; small GTPase mediated signal transduction[GO:0007264]	GTP binding[GO:0005525] ; GTPase activity[GO:0003924]	intracellular[GO:0005622] ; membrane[GO:0016020]	NA
TR36732|c0_g1_i1	23.9593	101.005	2.07577	0.016274	0.626128	No	PREDICTED: LOW QUALITY PROTEIN: AP2/ERF and B3 domain-containing transcription factor RAV1-like	Erythranthe guttatus	NA	NA	NA	NA	NA
TR41656|c0_g4_i3	19.603	82.6403	2.07577	0.0158617	0.617938	No	PREDICTED: glucan endo-1,3-beta-D-glucosidase isoform X2	Sesamum indicum	NA	NA	NA	NA	NA
TR33321|c2_g1_i1	17.4249	73.458	2.07577	0.015203	0.610799	No	NA	NA	NA	NA	NA	NA	NA
TR39228|c0_g1_i1	17.4249	73.458	2.07577	0.015203	0.610333	No	hypothetical protein MIMGU_mgv1a026042mg, partial	Mimulus guttatus	NA	NA	NA	NA	NA
TR35103|c3_g1_i6	17.4249	73.458	2.07577	0.015203	0.609868	No	PREDICTED: epsin-3-like	Sesamum indicum	NA	NA	NA	NA	NA
TR16349|c0_g2_i1	15.2468	64.2758	2.07577	0.0139667	0.593738	No	NA	NA	NA	NA	NA	NA	NA
TR41222|c1_g1_i6	15.2468	64.2758	2.07577	0.0139667	0.592781	No	cytochrome P450 CYP90C19	Salvia miltiorrhiza	NA	oxidation-reduction process[GO:0055114]	heme binding[GO:0020037] ; oxidoreductase activity, acting on paired donors, with incorporation or reduction of molecular oxygen[GO:0016705] ; monooxygenase activity[GO:0004497] ; iron ion binding[GO:0005506]	NA	NA
TR36772|c0_g1_i3	15.2468	64.2758	2.07577	0.0139667	0.593259	No	PREDICTED: omega-amidase,chloroplastic	Sesamum indicum	NA	NA	NA	NA	NA
TR3954|c1_g1_i2	13.0687	55.0935	2.07577	0.0117771	0.558338	No	PREDICTED: signal peptide peptidase-like 4 isoform X2	Sesamum indicum	NA	NA	NA	NA	NA
TR42204|c1_g5_i4	662.147	2782.22	2.07101	0.00367964	0.33358	No	PREDICTED: uncharacterized protein LOC105155456	Sesamum indicum	NA	NA	NA	NA	NA
TR33761|c1_g2_i1	50.0967	209.355	2.06317	0.0117766	0.558815	No	NA	NA	NA	NA	NA	NA	NA
TR39384|c1_g2_i3	60.9872	253.43	2.05501	0.0101108	0.529369	No	PREDICTED: probable mannitol dehydrogenase-like	Fragaria vesca subsp. vesca	NA	NA	NA	NA	NA
TR32138|c0_g1_i3	89.3027	370.963	2.0545	0.00692453	0.468192	No	PREDICTED: isoleucine N-monooxygenase 1-like	Sesamum indicum	NA	NA	NA	NA	NA
TR28756|c0_g1_i2	115.44	479.313	2.05382	0.00519688	0.399016	No	hypothetical protein MIMGU_mgv1a003476mg	Mimulus guttatus	NA	transport[GO:0006810]	transporter activity[GO:0005215]	integral component of membrane[GO:0016021] ; intracellular[GO:0005622]	NA
TR36558|c0_g7_i1	26.1374	108.351	2.05152	0.0172745	0.644382	No	PREDICTED: putative lysine-specific demethylase JMJD5	Sesamum indicum	NA	NA	NA	NA	NA
TR31954|c1_g1_i2	26.1374	108.351	2.05152	0.0172745	0.644838	No	PREDICTED: abscisic acid receptor PYL4	Sesamum indicum	NA	NA	NA	NA	NA
TR34788|c0_g7_i1	23.9593	99.1683	2.0493	0.0175599	0.644977	No	NA	NA	NA	NA	NA	NA	NA
TR42231|c0_g5_i2	108.906	449.93	2.04662	0.0057182	0.418892	No	PREDICTED: cell division protein FtsZ homolog 1, chloroplastic isoform X1	Sesamum indicum	NA	NA	NA	NA	NA
TR40235|c0_g5_i2	43.5623	179.972	2.04662	0.0139295	0.595521	No	PREDICTED: uncharacterized protein LOC104597700	Nelumbo nucifera	NA	NA	NA	NA	NA
TR31264|c0_g2_i1	250.483	1033.92	2.04534	0.00318115	0.308571	No	hypothetical protein MIMGU_mgv1a013131mg	Mimulus guttatus	NA	NA	NA	NA	NA
TR35367|c1_g6_i2	60.9872	251.594	2.04452	0.0105272	0.538852	No	hypothetical protein MIMGU_mgv1a010128mg	Mimulus guttatus	NA	NA	NA	NA	NA
TR40434|c0_g2_i3	100.193	413.201	2.04406	0.00635384	0.445031	No	PREDICTED: uncharacterized protein LOC105175433	Sesamum indicum	NA	NA	NA	NA	NA
TR2891|c0_g1_i7	355.033	1463.65	2.04355	0.00306733	0.304255	No	hypothetical protein M569_07033	Genlisea aurea	NA	NA	NA	NA	NA
TR32500|c1_g5_i5	176.427	727.234	2.04335	0.00383111	0.341435	No	PREDICTED: UDP-glycosyltransferase 74F2-like	Erythranthe guttatus	NA	NA	NA	NA	NA
TR33604|c0_g5_i1	78.4121	323.215	2.04335	0.00833969	0.502586	No	PREDICTED: protein EARLY FLOWERING 4	Sesamum indicum	NA	NA	NA	NA	NA
TR38257|c3_g1_i3	19.603	80.8038	2.04335	0.0173091	0.645213	No	hypothetical protein L484_026017	Morus notabilis	NA	NA	NA	NA	NA
TR3549|c0_g8_i2	69.6997	286.486	2.03924	0.00946674	0.512986	No	PREDICTED: glutaredoxin-C6	Vitis vinifera	NA	cell redox homeostasis[GO:0045454] ; oxidation-reduction process[GO:0055114]	electron carrier activity[GO:0009055] ; protein disulfide oxidoreductase activity[GO:0015035]	cell[GO:0005623]	NA
TR41848|c0_g5_i4	52.2748	214.865	2.03924	0.0123854	0.569241	No	NA	NA	NA	NA	NA	NA	NA
TR30772|c0_g1_i4	191.674	786.001	2.03587	0.00376254	0.33761	No	putative ethylene-responsive element binding protein	Salvia miltiorrhiza	NA	NA	NA	NA	NA
TR35227|c1_g4_i3	1498.54	6142.93	2.03537	0.00986052	0.523025	No	PREDICTED: dehydration-responsive protein RD22	Sesamum indicum	NA	NA	NA	NA	NA
TR30771|c1_g1_i5	45.7404	187.318	2.03395	0.0140626	0.593029	No	PREDICTED: pleiotropic drug resistance protein 2-like	Erythranthe guttatus	NA	NA	NA	NA	NA
TR38458|c2_g2_i1	15.2468	62.4393	2.03395	0.0154697	0.612633	No	PREDICTED: protein NLRC3	Sesamum indicum	NA	NA	NA	NA	NA
TR34092|c4_g1_i2	15.2468	62.4393	2.03395	0.0154697	0.613094	No	NA	NA	NA	NA	NA	NA	NA
TR13101|c0_g1_i1	265.73	1085.34	2.03012	0.00334618	0.31871	No	NA	NA	NA	NA	NA	NA	NA
TR29230|c0_g1_i2	152.468	622.557	2.0297	0.00452142	0.371525	No	NA	NA	NA	NA	NA	NA	NA
TR37000|c0_g3_i3	82.7684	337.907	2.02947	0.00835203	0.502754	No	PREDICTED: MATE efflux family protein 5-like isoform X1	Sesamum indicum	NA	NA	NA	NA	NA
TR43669|c0_g1_i4	182.962	745.599	2.02686	0.00403219	0.348735	No	NA	NA	NA	NA	NA	NA	NA
TR41267|c1_g1_i6	26.1374	106.514	2.02686	0.0185754	0.658845	No	PREDICTED: E3 ubiquitin-protein ligase MBR2-like	Nicotiana tomentosiformis	NA	NA	NA	NA	NA
TR38177|c0_g3_i1	13.0687	53.2571	2.02686	0.0131223	0.583263	No	NA	NA	NA	NA	NA	NA	NA
TR43912|c2_g2_i1	13.0687	53.2571	2.02686	0.0131223	0.582771	No	PREDICTED: translation initiation factor IF-2, chloroplastic-like	Citrus sinensis	NA	NA	NA	NA	NA
TR7951|c0_g4_i4	89.3027	363.617	2.02564	0.00782469	0.486581	No	PREDICTED: uncharacterized protein LOC105166742 isoform X1	Sesamum indicum	NA	NA	NA	NA	NA
TR39174|c0_g4_i2	23.9593	97.3319	2.02233	0.0189569	0.664765	No	PREDICTED: probable disease resistance protein At1g61300 isoform X1	Solanum lycopersicum	NA	NA	NA	NA	NA
TR30524|c0_g1_i3	34.8498	141.407	2.02063	0.0171357	0.646068	No	PREDICTED: bidirectional sugar transporter SWEET3b	Sesamum indicum	NA	NA	NA	NA	NA
TR30741|c0_g7_i1	740.559	3004.43	2.02041	0.00484135	0.384614	No	Chlorophyll a-b binding protein 13	Morus notabilis	NA	photosynthesis, light harvesting[GO:0009765] ; protein-chromophore linkage[GO:0018298]	metal ion binding[GO:0046872] ; chlorophyll binding[GO:0016168]	photosystem II[GO:0009523] ; integral component of membrane[GO:0016021] ; chloroplast[GO:0009507] ; photosystem I[GO:0009522]	NA
TR30731|c0_g5_i1	91.4808	370.963	2.01973	0.00781302	0.488161	No	PREDICTED: protein NIM1-INTERACTING 2	Sesamum indicum	NA	NA	NA	NA	NA
TR44813|c4_g1_i2	246.127	997.192	2.01847	0.00361144	0.331969	No	PREDICTED: probable leucine-rich repeat receptor-like protein kinase At5g63930	Sesamum indicum	NA	NA	NA	NA	NA
TR36101|c0_g1_i8	673.038	2725.29	2.01765	0.00454085	0.371962	No	PREDICTED: uncharacterized protein LOC105158378	Sesamum indicum	NA	NA	NA	NA	NA
TR36838|c1_g1_i4	196.03	793.346	2.01687	0.00404654	0.34883	No	hypothetical protein MIMGU_mgv1a010577mg	Mimulus guttatus	NA	NA	NA	NA	NA
TR31283|c0_g3_i5	130.687	528.898	2.01687	0.00542374	0.409275	No	PREDICTED: uncharacterized protein LOC105160017	Sesamum indicum	NA	NA	NA	NA	NA
TR7614|c1_g1_i6	108.906	440.748	2.01687	0.00651921	0.451807	No	PREDICTED: ethylene-responsive transcription factor ERF107-like	Sesamum indicum	NA	NA	NA	NA	NA
TR30751|c1_g2_i5	32.6717	132.224	2.01687	0.0178582	0.648697	No	NA	NA	NA	NA	NA	NA	NA
TR28852|c0_g1_i3	32.6717	132.224	2.01687	0.0178582	0.64825	No	PREDICTED: homeobox-leucine zipper protein ATHB-52-like	Sesamum indicum	NA	NA	NA	NA	NA
TR39411|c0_g4_i4	21.7812	88.1496	2.01687	0.0190567	0.665166	No	PREDICTED: protein kinase G11A-like	Setaria italica	NA	protein phosphorylation[GO:0006468]	protein kinase activity[GO:0004672] ; ATP binding[GO:0005524]	NA	NA
TR30741|c0_g1_i1	128.509	519.715	2.01585	0.00553164	0.412103	No	Os03g0592500, partial	Oryza sativa Japonica Group	NA	NA	NA	NA	NA
TR36115|c0_g2_i1	322.361	1302.04	2.01403	0.00348082	0.325645	No	NA	NA	NA	NA	NA	NA	NA
TR3241|c1_g3_i7	71.8778	290.159	2.01323	0.0101896	0.531385	No	PREDICTED: receptor-like protein 12	Erythranthe guttatus	NA	NA	NA	NA	NA
TR34891|c0_g1_i2	39.2061	157.935	2.01018	0.0167128	0.636501	No	PREDICTED: formimidoyltransferase-cyclodeaminase	Sesamum indicum	NA	NA	NA	NA	NA
TR3745|c0_g1_i2	19.603	78.9674	2.01018	0.0189106	0.666694	No	hypothetical protein MIMGU_mgv1a025225mg	Mimulus guttatus	NA	NA	NA	NA	NA
TR8187|c0_g8_i1	19.603	78.9674	2.01018	0.0189106	0.666248	No	PREDICTED: probable beta-1,3-galactosyltransferase 2	Sesamum indicum	NA	NA	NA	NA	NA
TR39168|c2_g14_i2	19.603	78.9674	2.01018	0.0189106	0.665357	No	NA	NA	NA	NA	NA	NA	NA
TR39665|c0_g3_i1	19.603	78.9674	2.01018	0.0189106	0.665802	No	PREDICTED: uncharacterized protein LOC105168293	Sesamum indicum	NA	NA	NA	NA	NA
TR9386|c0_g1_i1	19.603	78.9674	2.01018	0.0189106	0.664913	No	hypothetical protein MIMGU_mgv1a004405mg	Mimulus guttatus	NA	NA	oxidoreductase activity[GO:0016491] ; binding[GO:0005488]	NA	NA
TR37817|c0_g1_i15	104.55	420.547	2.00808	0.00708413	0.469343	No	hypothetical protein MIMGU_mgv1a009658mg	Mimulus guttatus	NA	metabolic process[GO:0008152]	catalytic activity[GO:0003824]	NA	NA
TR29491|c1_g1_i2	84.9465	341.58	2.0076	0.00889408	0.514226	No	PREDICTED: probable carboxylesterase 15 isoform X1	Sesamum indicum	NA	NA	NA	NA	NA
TR42204|c1_g5_i2	533.638	2144.97	2.00703	0.00408317	0.350268	No	PREDICTED: uncharacterized protein LOC105155456	Sesamum indicum	NA	NA	NA	NA	NA
TR34142|c0_g1_i1	219.99	883.333	2.00552	0.00400978	0.34794	No	PREDICTED: major allergen Pru ar 1-like	Sesamum indicum	NA	NA	NA	NA	NA
TR39035|c0_g1_i4	104.55	418.711	2.00177	0.00728019	0.47575	No	endopeptidase 1	Plantago major	NA	proteolysis[GO:0006508]	peptidase activity[GO:0008233]	NA	NA
TR31277|c1_g1_i4	34.8498	139.57	2.00177	0.0181954	0.652839	No	PREDICTED: probable serine/threonine-protein kinase Cx32, chloroplastic isoform X2	Sesamum indicum	NA	NA	NA	NA	NA
TR7736|c1_g3_i5	34.8498	139.57	2.00177	0.0181954	0.653284	No	hypothetical protein MIMGU_mgv1a012378mg	Mimulus guttatus	NA	NA	NA	NA	NA
TR37663|c0_g1_i1	26.1374	104.678	2.00177	0.019983	0.680366	No	PTC52-like protein 1	Ocimum basilicum	Lamiaceae	oxidation-reduction process[GO:0055114]	metal ion binding[GO:0046872] ; 2 iron, 2 sulfur cluster binding[GO:0051537] ; chlorophyllide a oxygenase [overall] activity[GO:0010277]	NA	map00860:Porphyrin and chlorophyll metabolism(oxygenase[ec:1.14.13.122])
TR41915|c0_g2_i1	26.1374	104.678	2.00177	0.019983	0.679926	No	PREDICTED: ultraviolet-B receptor UVR8 isoform X2	Sesamum indicum	NA	NA	NA	NA	NA
TR30810|c0_g1_i6	26.1374	104.678	2.00177	0.019983	0.681247	No	PREDICTED: LOW QUALITY PROTEIN: succinate dehydrogenase assembly factor 4, mitochondrial	Erythranthe guttatus	NA	NA	NA	NA	NA
TR39439|c0_g1_i2	26.1374	104.678	2.00177	0.019983	0.680806	No	NA	NA	NA	NA	NA	NA	NA
TR43933|c0_g5_i1	17.4249	69.7851	2.00177	0.0184041	0.653648	No	PREDICTED: protein SMG7L	Sesamum indicum	NA	NA	NA	NA	NA
TR42640|c0_g2_i7	17.4249	69.7851	2.00177	0.0184041	0.654089	No	PREDICTED: protein NRT1/ PTR FAMILY 5.10-like	Sesamum indicum	NA	NA	NA	NA	NA
TR37708|c0_g4_i8	58.8091	235.066	1.99895	0.0129359	0.581355	No	hypothetical protein MIMGU_mgv1a027009mg	Mimulus guttatus	NA	NA	NA	NA	NA
TR40309|c0_g2_i1	108.906	435.239	1.99873	0.007056	0.468659	No	hydroxycinnamoyltransferase 2	Glechoma hederacea	Lamiaceae	NA	transferase activity[GO:0016740]	NA	NA
TR37188|c0_g1_i1	32.6717	130.388	1.9967	0.01902	0.666093	No	hypothetical protein MIMGU_mgv1a006268mg	Mimulus guttatus	NA	NA	NA	integral component of membrane[GO:0016021]	NA
TR50516|c0_g1_i1	95.8371	381.982	1.99485	0.00824809	0.498206	No	PREDICTED: EG45-like domain containing protein	Prunus mume	NA	NA	NA	NA	NA
TR51559|c0_g1_i1	23.9593	95.4954	1.99485	0.0204756	0.681284	No	NA	NA	NA	NA	NA	NA	NA
TR34142|c0_g12_i2	204.743	815.384	1.99367	0.00438387	0.363627	No	PREDICTED: major allergen Pru ar 1-like	Sesamum indicum	NA	NA	NA	NA	NA
TR30998|c0_g4_i3	39.2061	156.098	1.99331	0.0176533	0.646155	No	NA	NA	NA	NA	NA	NA	NA
TR41316|c0_g7_i1	30.4936	121.206	1.99088	0.0198752	0.67845	No	hypothetical protein MIMGU_mgv1a003692mg	Mimulus guttatus	NA	NA	organic cyclic compound binding[GO:0097159] ; heterocyclic compound binding[GO:1901363]	NA	NA
TR2731|c0_g1_i1	15.2468	60.6029	1.99088	0.0171612	0.646564	No	hypothetical protein M569_08532, partial	Genlisea aurea	NA	NA	NA	NA	NA
TR38992|c0_g1_i4	58.8091	233.229	1.98764	0.0134904	0.589668	No	NA	NA	NA	NA	NA	NA	NA
TR13101|c0_g2_i1	115.44	457.276	1.98592	0.00701323	0.467587	No	NA	NA	NA	NA	NA	NA	NA
TR30544|c2_g1_i1	50.0967	198.337	1.98516	0.015576	0.612698	No	PREDICTED: remorin	Cucumis melo	NA	NA	NA	NA	NA
TR44659|c0_g1_i6	50.0967	198.337	1.98516	0.015576	0.612241	No	NA	NA	NA	NA	NA	NA	NA
TR42054|c3_g1_i1	28.3155	112.023	1.98414	0.0207243	0.683941	No	PREDICTED: thioredoxin F1, chloroplastic-like	Sesamum indicum	NA	NA	NA	NA	NA
TR2326|c0_g1_i1	104.55	413.201	1.98266	0.00790331	0.486303	No	PREDICTED: uncharacterized protein LOC105177873	Sesamum indicum	NA	NA	NA	NA	NA
TR28084|c0_g2_i1	180.784	714.379	1.98243	0.00495734	0.387401	No	NA	NA	NA	NA	NA	NA	NA
TR33109|c1_g2_i17	54.4529	214.865	1.98035	0.0148121	0.604315	No	NA	NA	NA	NA	NA	NA	NA
TR23940|c0_g1_i1	444.336	1751.97	1.97926	0.00421222	0.354979	No	putative ethylene-responsive element binding protein	Salvia miltiorrhiza	NA	NA	NA	NA	NA
TR38338|c0_g4_i6	426.911	1682.19	1.97833	0.00417727	0.354301	No	hypothetical protein MIMGU_mgv1a009538mg	Mimulus guttatus	NA	NA	NA	NA	NA
TR30871|c0_g1_i1	1193.61	4699.48	1.97717	0.00885746	0.514368	No	heat shock protein 70	Genlisea aurea	NA	NA	ATP binding[GO:0005524]	NA	NA
TR29836|c0_g1_i6	39.2061	154.262	1.97623	0.0186519	0.660669	No	NA	NA	NA	NA	NA	NA	NA
TR39601|c0_g1_i2	19.603	77.1309	1.97623	0.0206849	0.685648	No	PREDICTED: molybdate transporter 2	Sesamum indicum	NA	NA	NA	NA	NA
TR36014|c0_g3_i1	19.603	77.1309	1.97623	0.0206849	0.685216	No	NA	NA	NA	NA	NA	NA	NA
TR18806|c0_g1_i1	13.0687	51.4206	1.97623	0.0146511	0.600536	No	NA	NA	NA	NA	NA	NA	NA
TR17432|c0_g1_i1	74.0559	290.159	1.97016	0.0117238	0.557818	No	cinnamoyl CoA reductase	Salvia miltiorrhiza	NA	oxidation-reduction process[GO:0055114]	cinnamoyl-CoA reductase activity[GO:0016621] ; coenzyme binding[GO:0050662]	NA	map00940:Phenylpropanoid biosynthesis(reductase[ec:1.2.1.44])
TR28842|c0_g1_i4	74.0559	290.159	1.97016	0.0117238	0.557315	No	NA	NA	NA	NA	NA	NA	NA
TR42728|c1_g6_i6	60.9872	238.739	1.96885	0.0140003	0.591823	No	NA	NA	NA	NA	NA	NA	NA
TR34326|c0_g3_i7	30.4936	119.369	1.96885	0.0212444	0.691571	No	NA	NA	NA	NA	NA	NA	NA
TR39227|c1_g3_i2	30.4936	119.369	1.96885	0.0212444	0.691999	No	PREDICTED: F-box protein At3g07870-like	Sesamum indicum	NA	NA	NA	NA	NA
TR38680|c0_g10_i1	176.427	690.505	1.96858	0.00535394	0.405169	No	PREDICTED: 24-methylenesterol C-methyltransferase 2	Sesamum indicum	NA	NA	NA	NA	NA
TR43328|c1_g4_i7	54.4529	213.028	1.96796	0.0154856	0.612803	No	unnamed protein product	Coffea canephora	NA	NA	NA	integral component of membrane[GO:0016021]	NA
TR36380|c0_g2_i6	82.7684	323.215	1.96534	0.0108208	0.540743	No	PREDICTED: probable 2-carboxy-D-arabinitol-1-phosphatase	Sesamum indicum	NA	NA	NA	NA	NA
TR34640|c1_g2_i2	41.3842	161.608	1.96534	0.0188104	0.664049	No	PREDICTED: uncharacterized protein LOC105166004	Sesamum indicum	NA	NA	NA	NA	NA
TR39581|c1_g3_i1	34.8498	135.897	1.96329	0.0205343	0.682372	No	NA	NA	NA	NA	NA	NA	NA
TR38628|c0_g5_i7	17.4249	67.9487	1.96329	0.0202899	0.681129	No	PREDICTED: RPM1-interacting protein 4-like	Sesamum indicum	NA	NA	NA	NA	NA
TR2862|c0_g1_i1	119.796	466.458	1.96116	0.00751952	0.483591	No	NA	NA	NA	NA	NA	NA	NA
TR31449|c0_g1_i1	113.262	440.748	1.96029	0.00799104	0.489414	No	NA	NA	NA	NA	NA	NA	NA
TR38628|c0_g3_i3	56.631	220.374	1.96029	0.0154051	0.610994	No	NA	NA	NA	NA	NA	NA	NA
TR28912|c0_g1_i2	139.399	541.753	1.95841	0.00663522	0.456245	No	NA	NA	NA	NA	NA	NA	NA
TR36283|c0_g11_i2	243.949	947.608	1.95771	0.00474612	0.378762	No	NA	NA	NA	NA	NA	NA	NA
TR14459|c0_g2_i1	32.6717	126.715	1.95547	0.0215966	0.694877	No	NA	NA	NA	NA	NA	NA	NA
TR35673|c0_g6_i2	10.8906	42.2384	1.95547	0.0105444	0.536603	No	NA	NA	NA	NA	NA	NA	NA
TR44697|c14_g2_i5	10.8906	42.2384	1.95547	0.0105444	0.537122	No	PREDICTED: ubiquitin-like-specific protease ESD4	Pyrus x bretschneideri	NA	NA	NA	NA	NA
TR37313|c0_g1_i1	10.8906	42.2384	1.95547	0.0105444	0.536085	No	NA	NA	NA	NA	NA	NA	NA
TR38920|c1_g10_i11	80.5903	312.197	1.95378	0.0116074	0.555795	No	PREDICTED: carbon catabolite repressor protein 4 homolog 1-like	Sesamum indicum	NA	NA	NA	NA	NA
TR31989|c0_g1_i2	47.9185	185.481	1.95262	0.0180009	0.648069	No	PREDICTED: chitotriosidase-1	Vitis vinifera	NA	carbohydrate metabolic process[GO:0005975] ; chitin catabolic process[GO:0006032]	chitinase activity[GO:0004568] ; chitin binding[GO:0008061]	extracellular region[GO:0005576]	map00520:Amino sugar and nucleotide sugar metabolism(chitodextrinase[ec:3.2.1.14])
TR37188|c0_g2_i1	37.028	143.243	1.95178	0.0207176	0.685869	No	NA	NA	NA	NA	NA	NA	NA
TR34831|c0_g2_i5	15.2468	58.7664	1.94648	0.0190696	0.664737	No	PREDICTED: casein kinase I-like	Nelumbo nucifera	NA	NA	NA	NA	NA
TR44145|c1_g1_i3	15.2468	58.7664	1.94648	0.0190696	0.665177	No	PREDICTED: probable cyclic nucleotide-gated ion channel 20, chloroplastic	Sesamum indicum	NA	NA	NA	NA	NA
TR44813|c4_g5_i4	15.2468	58.7664	1.94648	0.0190696	0.663858	No	PREDICTED: LRR receptor-like serine/threonine-protein kinase GSO1	Pyrus x bretschneideri	NA	NA	NA	NA	NA
TR7858|c0_g3_i1	15.2468	58.7664	1.94648	0.0190696	0.664297	No	transcription factor	Medicago truncatula	NA	NA	NA	NA	NA
TR29604|c0_g1_i1	65.3435	251.594	1.94498	0.0143912	0.597793	No	hypothetical protein POPTR_0001s40030g	Populus trichocarpa	NA	NA	NA	NA	NA
TR29828|c3_g2_i1	119.796	460.949	1.94402	0.0080955	0.491242	No	unknown	Zea mays	NA	microtubule-based process[GO:0007017] ; metabolic process[GO:0008152]	structural constituent of cytoskeleton[GO:0005200] ; GTP binding[GO:0005525] ; GTPase activity[GO:0003924]	cytoplasm[GO:0005737] ; microtubule[GO:0005874]	NA
TR38054|c0_g1_i1	34.8498	134.061	1.94366	0.0218243	0.697093	No	NA	NA	NA	NA	NA	NA	NA
TR40777|c4_g13_i6	54.4529	209.355	1.94287	0.0169304	0.640159	No	NA	NA	NA	NA	NA	NA	NA
TR3435|c2_g8_i1	182.962	703.36	1.94272	0.00586213	0.42471	No	hypothetical protein MIMGU_mgv1a026895mg	Mimulus guttatus	NA	NA	NA	NA	NA
TR28369|c0_g1_i1	226.524	870.477	1.94214	0.00524101	0.401235	No	NA	NA	NA	NA	NA	NA	NA
TR25557|c0_g1_i1	58.8091	225.883	1.94147	0.0159706	0.619887	No	PREDICTED: uncharacterized protein LOC105168254	Sesamum indicum	NA	NA	NA	NA	NA
TR35948|c0_g1_i1	39.2061	150.589	1.94147	0.0208394	0.684309	No	NA	NA	NA	NA	NA	NA	NA
TR3267|c1_g1_i2	43.5623	167.117	1.93971	0.0199109	0.679227	No	NA	NA	NA	NA	NA	NA	NA
TR25142|c0_g1_i4	143.756	550.935	1.93826	0.00706685	0.468788	No	NA	NA	NA	NA	NA	NA	NA
TR40969|c0_g1_i3	148.112	567.463	1.93784	0.00692187	0.468614	No	PREDICTED: protein ECERIFERUM 3-like	Sesamum indicum	NA	NA	NA	NA	NA
TR37319|c1_g2_i6	80.5903	308.524	1.9367	0.012403	0.568564	No	PREDICTED: RNA polymerase sigma factor sigD, chloroplastic	Sesamum indicum	NA	NA	NA	NA	NA
TR8245|c2_g4_i7	28.3155	108.351	1.93604	0.0238547	0.717562	No	NA	NA	NA	NA	NA	NA	NA
TR36101|c0_g2_i1	352.855	1349.79	1.93559	0.00486465	0.382427	No	PREDICTED: uncharacterized protein LOC105158378	Sesamum indicum	NA	NA	NA	NA	NA
TR40117|c0_g2_i1	126.331	482.986	1.93478	0.00800331	0.488462	No	PREDICTED: probable long-chain-alcohol O-fatty-acyltransferase 5	Sesamum indicum	NA	NA	NA	NA	NA
TR33716|c2_g1_i1	32.6717	124.879	1.93441	0.0230244	0.709607	No	NA	NA	NA	NA	NA	NA	NA
TR39174|c0_g4_i5	32.6717	124.879	1.93441	0.0230244	0.709192	No	unnamed protein product	Coffea canephora	NA	NA	NA	NA	NA
TR41286|c1_g1_i1	1404.88	5366.11	1.93342	0.0120775	0.56495	No	unnamed protein product	Coffea canephora	NA	NA	kinase activity[GO:0016301]	NA	NA
TR31831|c1_g2_i1	4687.3	17894.4	1.93268	0.0527542	0.924664	No	PREDICTED: chlorophyll a-b binding protein 6, chloroplastic-like	Malus domestica	NA	NA	NA	NA	NA
TR38338|c0_g3_i1	119.796	457.276	1.93248	0.00850536	0.505058	No	hypothetical protein MIMGU_mgv1a009538mg	Mimulus guttatus	NA	NA	NA	NA	NA
TR2732|c2_g4_i3	95.8371	365.454	1.93103	0.0107484	0.539168	No	PREDICTED: uncharacterized protein LOC105158935	Sesamum indicum	NA	NA	NA	NA	NA
TR7969|c1_g2_i7	95.8371	365.454	1.93103	0.0107484	0.538655	No	NA	NA	NA	NA	NA	NA	NA
TR41679|c1_g2_i2	54.4529	207.519	1.93016	0.0177051	0.647599	No	hypothetical protein MIMGU_mgv1a021164mg, partial	Mimulus guttatus	NA	NA	protein kinase activity[GO:0004672]	NA	NA
TR36025|c0_g1_i6	89.3027	339.743	1.92767	0.0116864	0.557549	No	PREDICTED: ankyrin repeat-containing protein At5g02620-like	Sesamum indicum	NA	NA	NA	NA	NA
TR30771|c1_g1_i4	283.155	1074.32	1.92376	0.00525514	0.40115	No	PREDICTED: pleiotropic drug resistance protein 2-like, partial	Erythranthe guttatus	NA	NA	NA	NA	NA
TR2461|c1_g2_i2	113.262	429.729	1.92376	0.00933491	0.511101	No	NA	NA	NA	NA	NA	NA	NA
TR33834|c0_g2_i1	65.3435	247.921	1.92376	0.0155655	0.613203	No	NA	NA	NA	NA	NA	NA	NA
TR41012|c0_g3_i1	56.631	214.865	1.92376	0.0175531	0.645179	No	PREDICTED: ATP-dependent Clp protease ATP-binding subunit clpX-like, mitochondrial	Sesamum indicum	NA	NA	NA	NA	NA
TR34326|c0_g3_i6	26.1374	99.1683	1.92376	0.0249474	0.730815	No	NA	NA	NA	NA	NA	NA	NA
TR36993|c0_g5_i1	21.7812	82.6403	1.92376	0.024459	0.72416	No	PREDICTED: probable magnesium transporter NIPA4	Sesamum indicum	NA	NA	NA	NA	NA
TR32398|c0_g2_i3	17.4249	66.1122	1.92376	0.0224008	0.700637	No	PREDICTED: uncharacterized protein LOC103491714	Cucumis melo	NA	NA	NA	NA	NA
TR36966|c0_g2_i1	17.4249	66.1122	1.92376	0.0224008	0.700221	No	hypothetical protein MIMGU_mgv1a019822mg, partial	Mimulus guttatus	NA	NA	ATP binding[GO:0005524]	NA	NA
TR8180|c0_g2_i1	13.0687	49.5842	1.92376	0.0163958	0.628517	No	PREDICTED: VIN3-like protein 2 isoform X1	Sesamum indicum	NA	NA	NA	NA	NA
TR23098|c0_g1_i3	119.796	453.603	1.92085	0.00893727	0.515027	No	PREDICTED: uncharacterized protein LOC105162031	Sesamum indicum	NA	NA	NA	NA	NA
TR37914|c0_g8_i7	50.0967	189.154	1.91678	0.0197169	0.676112	No	unnamed protein product	Coffea canephora	NA	NA	NA	integral component of membrane[GO:0016021]	NA
TR3117|c0_g3_i2	41.3842	156.098	1.9153	0.0220701	0.696079	No	PREDICTED: calvin cycle protein CP12-3, chloroplastic	Erythranthe guttatus	NA	NA	NA	NA	NA
TR39012|c1_g5_i1	41.3842	156.098	1.9153	0.0220701	0.696497	No	hypothetical protein MIMGU_mgv1a005575mg	Mimulus guttatus	NA	D-xylose metabolic process[GO:0042732] ; pentose-phosphate shunt[GO:0006098]	metal ion binding[GO:0046872] ; xylose isomerase activity[GO:0009045]	NA	map00051:Fructose and mannose metabolism(isomerase[ec:5.3.1.5]) ; map00040:Pentose and glucuronate interconversions(isomerase[ec:5.3.1.5])
TR2326|c0_g1_i5	78.4121	295.668	1.91483	0.0137989	0.594279	No	NA	NA	NA	NA	NA	NA	NA
TR38509|c0_g1_i4	37.028	139.57	1.9143	0.0232878	0.711893	No	PREDICTED: zinc finger protein NUTCRACKER-like	Sesamum indicum	NA	NA	NA	NA	NA
TR40442|c0_g1_i2	139.399	525.225	1.91371	0.0080389	0.48837	No	NA	NA	NA	NA	NA	NA	NA
TR44018|c4_g1_i4	32.6717	123.042	1.91304	0.0245548	0.725366	No	unnamed protein product	Coffea canephora	NA	NA	NA	NA	NA
TR28729|c0_g2_i2	60.9872	229.556	1.91227	0.0172091	0.647444	No	hypothetical protein MIMGU_mgv1a015256mg	Mimulus guttatus	NA	response to desiccation[GO:0009269]	NA	NA	NA
TR7497|c0_g1_i1	80.5903	303.014	1.91071	0.0137033	0.594049	No	PREDICTED: 1,2-dihydroxy-3-keto-5-methylthiopentene dioxygenase 1	Sesamum indicum	NA	NA	NA	NA	NA
TR38338|c0_g4_i5	444.336	1669.33	1.90955	0.00558723	0.415071	No	hypothetical protein MIMGU_mgv1a009538mg	Mimulus guttatus	NA	NA	NA	NA	NA
TR43420|c0_g2_i3	47.9185	179.972	1.90912	0.0208286	0.684381	No	PREDICTED: DNA-directed RNA polymerase 3, chloroplastic isoform X1	Sesamum indicum	NA	NA	NA	NA	NA
TR32208|c1_g6_i1	67.5216	253.43	1.90817	0.0160282	0.620753	No	NA	NA	NA	NA	NA	NA	NA
TR39778|c0_g1_i1	87.1246	326.888	1.90764	0.0129456	0.580801	No	PREDICTED: 60S acidic ribosomal protein P1-like	Sesamum indicum	NA	NA	NA	NA	NA
TR37098|c0_g1_i3	39.2061	146.916	1.90584	0.0233095	0.71173	No	PREDICTED: arogenate dehydratase/prephenate dehydratase 1, chloroplastic	Sesamum indicum	NA	NA	NA	NA	NA
TR34096|c0_g1_i1	19.603	73.458	1.90584	0.0248395	0.729276	No	PREDICTED: protein SRG1-like	Sesamum indicum	NA	NA	NA	NA	NA
TR27529|c3_g1_i11	19.603	73.458	1.90584	0.0248395	0.729683	No	NA	NA	NA	NA	NA	NA	NA
TR36110|c0_g1_i1	19.603	73.458	1.90584	0.0248395	0.72887	No	hypothetical protein MIMGU_mgv1a008127mg	Mimulus guttatus	NA	oxidation-reduction process[GO:0055114]	NAD binding[GO:0051287] ; oxidoreductase activity, acting on the CH-OH group of donors, NAD or NADP as acceptor[GO:0016616]	NA	NA
TR41150|c1_g3_i2	19.603	73.458	1.90584	0.0248395	0.73009	No	NA	NA	NA	NA	NA	NA	NA
TR33410|c0_g1_i1	65.3435	244.248	1.90223	0.0168414	0.639549	No	PREDICTED: uncharacterized protein LOC105166840	Sesamum indicum	NA	NA	NA	NA	NA
TR31267|c2_g1_i6	30.4936	113.86	1.90068	0.0260009	0.745506	No	PREDICTED: transcriptional corepressor LEUNIG-like	Erythranthe guttatus	NA	NA	NA	NA	NA
TR3863|c0_g1_i1	30.4936	113.86	1.90068	0.0260009	0.745912	No	NA	NA	NA	NA	NA	NA	NA
TR29196|c0_g1_i1	15.2468	56.93	1.90068	0.0212288	0.692347	No	PREDICTED: uncharacterized protein LOC105177873	Sesamum indicum	NA	NA	NA	NA	NA
TR36139|c0_g1_i5	87.1246	325.052	1.89952	0.0133625	0.586515	No	NA	NA	NA	NA	NA	NA	NA
TR34195|c0_g1_i3	63.1653	235.066	1.89586	0.0177303	0.648072	No	NA	NA	NA	NA	NA	NA	NA
TR26868|c0_g1_i2	795.012	2956.68	1.89493	0.00797825	0.489199	No	PREDICTED: photosystem I subunit O-like	Nicotiana tomentosiformis	NA	NA	NA	NA	NA
TR19514|c0_g1_i2	47.9185	178.136	1.89432	0.0218712	0.69648	No	PREDICTED: calcium-binding protein KIC-like	Sesamum indicum	NA	NA	NA	NA	NA
TR27529|c3_g1_i10	47.9185	178.136	1.89432	0.0218712	0.696901	No	NA	NA	NA	NA	NA	NA	NA
TR2705|c0_g1_i1	47.9185	178.136	1.89432	0.0218712	0.697323	No	hypothetical protein MIMGU_mgv1a026963mg	Mimulus guttatus	NA	NA	NA	NA	NA
TR3908|c0_g2_i3	596.804	2214.76	1.89182	0.0067434	0.461874	No	hypothetical protein MIMGU_mgv1a015739mg	Mimulus guttatus	NA	NA	NA	NA	NA
TR20987|c0_g1_i1	32.6717	121.206	1.89134	0.0261959	0.746625	No	PREDICTED: subtilisin-like protease SDD1	Sesamum indicum	NA	NA	NA	NA	NA
TR34800|c0_g1_i4	21.7812	80.8038	1.89134	0.0266403	0.752773	No	beta-1,3-glucanase	Olea europaea	NA	NA	hydrolase activity[GO:0016787]	NA	NA
TR36515|c0_g2_i9	104.55	387.491	1.88998	0.0116437	0.556014	No	NA	NA	NA	NA	NA	NA	NA
TR40635|c1_g1_i1	82.7684	306.687	1.88962	0.0145188	0.598371	No	PREDICTED: phosphoglucan phosphatase DSP4, chloroplastic-like	Fragaria vesca subsp. vesca	NA	NA	NA	NA	NA
TR33604|c0_g2_i4	71.8778	266.285	1.88935	0.0162981	0.626597	No	PREDICTED: protein EARLY FLOWERING 4	Sesamum indicum	NA	NA	NA	NA	NA
TR35227|c1_g4_i2	167.715	620.72	1.88793	0.00785554	0.487349	No	PREDICTED: dehydration-responsive protein RD22	Sesamum indicum	NA	NA	NA	NA	NA
TR24948|c0_g1_i3	39.2061	145.08	1.8877	0.0246626	0.726511	No	PREDICTED: uncharacterized protein LOC104436619	Eucalyptus grandis	NA	NA	NA	NA	NA
TR2850|c1_g4_i4	56.631	209.355	1.88629	0.0200169	0.67976	No	PREDICTED: uncharacterized protein LOC105173228	Sesamum indicum	NA	NA	NA	NA	NA
TR33867|c1_g10_i1	28.3155	104.678	1.88629	0.0275036	0.760043	No	hypothetical protein PRUPE_ppa016993mg	Prunus persica	NA	NA	NA	NA	NA
TR42863|c2_g7_i3	28.3155	104.678	1.88629	0.0275036	0.759645	No	NA	NA	NA	NA	NA	NA	NA
TR25506|c2_g2_i2	102.371	378.309	1.88575	0.0120954	0.565284	No	hypothetical protein CL192Contig1_03	Pinus taeda	NA	microtubule-based process[GO:0007017]	structural constituent of cytoskeleton[GO:0005200] ; GTP binding[GO:0005525]	microtubule[GO:0005874]	NA
TR44244|c0_g1_i6	381.17	1408.56	1.88571	0.00600843	0.429403	No	NA	NA	NA	NA	NA	NA	NA
TR37073|c0_g4_i1	45.7404	168.953	1.88508	0.0231431	0.709529	No	NA	NA	NA	NA	NA	NA	NA
TR2326|c0_g1_i8	87.1246	321.379	1.88312	0.0142384	0.597568	No	PREDICTED: uncharacterized protein LOC105177873	Sesamum indicum	NA	NA	NA	NA	NA
TR32994|c0_g1_i7	52.2748	192.827	1.88312	0.0214522	0.692772	No	PREDICTED: uncharacterized protein LOC105172402	Sesamum indicum	NA	NA	NA	NA	NA
TR39189|c0_g4_i6	34.8498	128.552	1.88312	0.0262502	0.746557	No	NA	NA	NA	NA	NA	NA	NA
TR34693|c0_g1_i3	93.659	345.253	1.88216	0.0133745	0.586551	No	PREDICTED: sugar transport protein 14-like	Sesamum indicum	NA	NA	NA	NA	NA
TR34225|c0_g1_i7	58.8091	216.701	1.88159	0.019761	0.676305	No	hypothetical protein MIMGU_mgv1a011175mg	Mimulus guttatus	NA	NA	NA	NA	NA
TR44659|c0_g1_i5	100.193	369.126	1.88133	0.0125761	0.573006	No	PREDICTED: small subunit processome component 20 homolog isoform X2	Sesamum indicum	NA	NA	NA	NA	NA
TR7966|c0_g1_i9	82.7684	304.851	1.88095	0.0150033	0.605084	No	PREDICTED: acylamino-acid-releasing enzyme-like	Sesamum indicum	NA	NA	NA	NA	NA
TR29836|c0_g1_i13	41.3842	152.425	1.88095	0.0245843	0.725829	No	NA	NA	NA	NA	NA	NA	NA
TR40814|c0_g3_i1	130.687	481.15	1.88037	0.00977757	0.520722	No	PREDICTED: two-component response regulator-like APRR9	Sesamum indicum	NA	NA	NA	NA	NA
TR3450|c0_g4_i1	23.9593	88.1496	1.87937	0.0280252	0.766415	No	PREDICTED: protein CREG1-like	Sesamum indicum	NA	NA	NA	NA	NA
TR39311|c0_g3_i1	23.9593	88.1496	1.87937	0.0280252	0.766018	No	PREDICTED: leucine-rich repeat receptor-like serine/threonine/tyrosine-protein kinase SOBIR1	Sesamum indicum	NA	NA	NA	NA	NA
TR42672|c2_g4_i13	23.9593	88.1496	1.87937	0.0280252	0.76562	No	PREDICTED: protein NRT1/ PTR FAMILY 5.5-like isoform X2	Sesamum indicum	NA	NA	NA	NA	NA
TR30584|c0_g1_i1	879.959	3235.83	1.87863	0.00911495	0.505894	No	PREDICTED: calvin cycle protein CP12-1, chloroplastic-like	Sesamum indicum	NA	NA	NA	NA	NA
TR37358|c0_g2_i2	54.4529	200.173	1.87817	0.0211941	0.691646	No	PREDICTED: UDP-glycosyltransferase 74F2-like	Erythranthe guttatus	NA	NA	NA	NA	NA
TR36373|c0_g5_i1	30.4936	112.023	1.87722	0.0278331	0.762745	No	PREDICTED: uncharacterized protein LOC105166244	Sesamum indicum	NA	NA	NA	NA	NA
TR41845|c1_g5_i2	98.0152	359.944	1.8767	0.0130875	0.583192	No	hypothetical protein MIMGU_mgv1a003476mg	Mimulus guttatus	NA	transport[GO:0006810]	transporter activity[GO:0005215]	integral component of membrane[GO:0016021] ; intracellular[GO:0005622]	NA
TR2891|c0_g1_i5	333.252	1223.08	1.87583	0.00627419	0.441802	No	hypothetical protein M569_07033	Genlisea aurea	NA	NA	NA	NA	NA
TR32325|c1_g1_i1	37.028	135.897	1.87583	0.0262076	0.746554	No	NA	NA	NA	NA	NA	NA	NA
TR37589|c0_g1_i8	43.5623	159.771	1.87485	0.0244844	0.724096	No	PREDICTED: uncharacterized protein LOC105177049	Sesamum indicum	NA	NA	NA	NA	NA
TR12035|c0_g2_i1	93.659	343.416	1.87447	0.0137858	0.594198	No	hypothetical protein VITISV_034590	Vitis vinifera	NA	NA	NA	NA	NA
TR3435|c2_g8_i2	69.6997	255.267	1.87278	0.0177644	0.64842	No	PREDICTED: probable calcium-binding protein CML36	Sesamum indicum	NA	NA	NA	NA	NA
TR3898|c1_g4_i1	152.468	558.281	1.87248	0.00895288	0.512006	No	NA	NA	NA	NA	NA	NA	NA
TR30741|c0_g7_i3	115.44	422.384	1.87141	0.0113976	0.555856	No	PREDICTED: chlorophyll a-b binding protein 13, chloroplastic	Sesamum indicum	NA	NA	NA	NA	NA
TR12669|c0_g1_i1	78.4121	286.486	1.86932	0.0163568	0.627938	No	PREDICTED: pleiotropic drug resistance protein 2-like isoform X3	Eucalyptus grandis	NA	NA	NA	NA	NA
TR32030|c0_g1_i14	45.7404	167.117	1.86932	0.0243401	0.722264	No	hypothetical protein MIMGU_mgv1a013063mg	Mimulus guttatus	NA	vesicle-mediated transport[GO:0016192]	NA	integral component of membrane[GO:0016021]	NA
TR32435|c0_g3_i1	45.7404	167.117	1.86932	0.0243401	0.722671	No	PREDICTED: uncharacterized J domain-containing protein C3E7.11c	Sesamum indicum	NA	NA	NA	NA	NA
TR26534|c0_g1_i5	39.2061	143.243	1.86932	0.0261015	0.746357	No	PREDICTED: LOW QUALITY PROTEIN: threonine dehydratase biosynthetic, chloroplastic	Sesamum indicum	NA	NA	NA	NA	NA
TR34932|c0_g4_i1	39.2061	143.243	1.86932	0.0261015	0.745952	No	NA	NA	NA	NA	NA	NA	NA
TR41176|c1_g3_i10	26.1374	95.4954	1.86932	0.028995	0.774832	No	hypothetical protein MIMGU_mgv1a008110mg	Mimulus guttatus	NA	NA	NA	NA	NA
TR7886|c0_g4_i10	19.603	71.6216	1.86932	0.0272717	0.759612	No	PREDICTED: uncharacterized protein LOC105174188 isoform X2	Sesamum indicum	NA	NA	NA	NA	NA
TR26835|c0_g1_i3	19.603	71.6216	1.86932	0.0272717	0.760014	No	PREDICTED: protein S-acyltransferase 24-like	Sesamum indicum	NA	NA	NA	NA	NA
TR36896|c0_g3_i1	13.0687	47.7477	1.86932	0.0183967	0.654268	No	PREDICTED: uncharacterized protein LOC105172258	Sesamum indicum	NA	NA	NA	NA	NA
TR31699|c0_g1_i1	165.537	604.192	1.86786	0.00862908	0.508392	No	PREDICTED: probable WRKY transcription factor 35	Sesamum indicum	NA	NA	NA	NA	NA
TR20074|c0_g1_i1	479.185	1748.3	1.8673	0.00675774	0.462255	No	hypothetical protein MIMGU_mgv1a017106mg	Mimulus guttatus	NA	NA	NA	NA	NA
TR39778|c0_g1_i2	74.0559	269.958	1.86605	0.0173273	0.645435	No	PREDICTED: 60S acidic ribosomal protein P1-like	Sesamum indicum	NA	NA	NA	NA	NA
TR37311|c0_g2_i4	60.9872	222.21	1.86535	0.0203297	0.681595	No	PREDICTED: protease Do-like 5, chloroplastic	Sesamum indicum	NA	NA	NA	NA	NA
TR36243|c0_g1_i2	237.415	864.968	1.86524	0.00716667	0.470668	No	PREDICTED: haloacid dehalogenase-like hydrolase domain-containing protein 3	Sesamum indicum	NA	NA	NA	NA	NA
TR35504|c2_g2_i1	102.371	372.799	1.86459	0.0131723	0.583513	No	PREDICTED: uncharacterized protein LOC105175444	Sesamum indicum	NA	NA	NA	NA	NA
TR40709|c2_g4_i1	82.7684	301.178	1.86346	0.016023	0.621007	No	PREDICTED: probable glutamate carboxypeptidase 2 isoform X1	Sesamum indicum	NA	NA	NA	NA	NA
TR38815|c0_g4_i3	28.3155	102.841	1.86075	0.0295514	0.781768	No	PREDICTED: 26S proteasome non-ATPase regulatory subunit 11 homolog	Sesamum indicum	NA	NA	NA	NA	NA
TR4093|c1_g8_i3	28.3155	102.841	1.86075	0.0295514	0.781376	No	NA	NA	NA	NA	NA	NA	NA
TR26868|c0_g2_i1	270.086	980.664	1.86034	0.00698685	0.467604	No	PREDICTED: uncharacterized protein LOC102602224	Solanum tuberosum	NA	pentose-phosphate shunt[GO:0006098] ; regulation of protein dephosphorylation[GO:0035304] ; cellular cation homeostasis[GO:0030003] ; photosystem II assembly[GO:0010207] ; divalent metal ion transport[GO:0070838] ; cysteine biosynthetic process[GO:0019344] ; plastid organization[GO:0009657] ; photosynthesis, light harvesting in photosystem I[GO:0009768] ; rRNA processing[GO:0006364]	NA	photosystem I[GO:0009522] ; chloroplast[GO:0009507] ; integral component of membrane[GO:0016021]	NA
TR32540|c0_g1_i1	100.193	363.617	1.85963	0.0137153	0.593102	No	PREDICTED: beta-fructofuranosidase, insoluble isoenzyme 1-like isoform X1	Sesamum indicum	NA	NA	NA	NA	NA
TR44741|c5_g1_i5	21.7812	78.9674	1.85818	0.0290491	0.7751	No	unnamed protein product	Coffea canephora	NA	NA	NA	NA	NA
TR36809|c0_g1_i3	37.028	134.061	1.8562	0.0278142	0.762626	No	PREDICTED: acyl-coenzyme A thioesterase 9, mitochondrial-like isoform X2	Sesamum indicum	NA	NA	NA	NA	NA
TR38496|c1_g1_i4	52.2748	189.154	1.85538	0.0235402	0.712987	No	hypothetical protein MIMGU_mgv1a006158mg	Mimulus guttatus	NA	NA	NA	NA	NA
TR42592|c0_g3_i2	52.2748	189.154	1.85538	0.0235402	0.712577	No	PREDICTED: probable protein phosphatase 2C 50	Sesamum indicum	NA	NA	NA	NA	NA
TR43885|c1_g11_i1	30.4936	110.187	1.85338	0.0298057	0.778331	No	PREDICTED: transcription factor LHW-like	Erythranthe guttatus	NA	NA	NA	NA	NA
TR2793|c0_g4_i8	832.04	3006.27	1.85325	0.00952813	0.515782	No	PREDICTED: glycine-rich RNA-binding protein 2-like	Sesamum indicum	NA	NA	NA	NA	NA
TR40251|c0_g2_i2	63.1653	227.72	1.85005	0.0208665	0.684347	No	hypothetical protein CISIN_1g039699mg, partial	Citrus sinensis	NA	NA	NA	NA	NA
TR37708|c0_g2_i1	23.9593	86.3132	1.849	0.0303617	0.785452	No	hypothetical protein MIMGU_mgv1a027009mg	Mimulus guttatus	NA	NA	NA	NA	NA
TR31966|c0_g1_i3	65.3435	235.066	1.84695	0.0205376	0.682054	No	hypothetical protein MIMGU_mgv1a010248mg	Mimulus guttatus	NA	metabolic process[GO:0008152]	molybdenum ion binding[GO:0030151] ; pyridoxal phosphate binding[GO:0030170] ; catalytic activity[GO:0003824]	NA	NA
TR7463|c0_g1_i1	148.112	532.571	1.84629	0.0101958	0.531179	No	hypothetical protein MIMGU_mgv1a019221mg	Mimulus guttatus	NA	NA	NA	NA	NA
TR37311|c0_g2_i2	41.3842	148.752	1.84576	0.0274141	0.759163	No	PREDICTED: protease Do-like 5, chloroplastic	Sesamum indicum	NA	NA	NA	NA	NA
TR40709|c2_g2_i1	91.4808	328.725	1.84534	0.0157694	0.616165	No	PREDICTED: probable glutamate carboxypeptidase 2 isoform X1	Sesamum indicum	NA	NA	NA	NA	NA
TR40174|c0_g2_i1	50.0967	179.972	1.84499	0.0250203	0.732543	No	PREDICTED: uncharacterized protein LOC105949855	Erythranthe guttatus	NA	NA	NA	NA	NA
TR39820|c0_g1_i1	67.5216	242.411	1.84404	0.0202153	0.680358	No	AT1G78900	Arabidopsis thaliana	NA	NA	NA	NA	NA
TR7335|c0_g1_i1	67.5216	242.411	1.84404	0.0202153	0.679924	No	PREDICTED: uncharacterized protein LOC104211068	Nicotiana sylvestris	NA	NA	NA	NA	NA
TR32235|c2_g1_i5	254.839	914.552	1.84348	0.00765049	0.484909	No	PREDICTED: ethylene-responsive transcription factor 5-like	Solanum lycopersicum	NA	NA	NA	NA	NA
TR41604|c1_g4_i4	169.893	609.701	1.84348	0.00940141	0.51208	No	PREDICTED: subtilisin-like protease	Sesamum indicum	NA	NA	NA	NA	NA
TR41447|c3_g3_i2	84.9465	304.851	1.84348	0.0169081	0.639776	No	hypothetical protein MIMGU_mgv1a008790mg	Mimulus guttatus	NA	NA	zinc ion binding[GO:0008270]	NA	NA
TR32030|c0_g1_i15	43.5623	156.098	1.8413	0.0271806	0.759082	No	PREDICTED: protein transport protein SFT2-like	Sesamum indicum	NA	NA	NA	NA	NA
TR44218|c2_g3_i5	34.8498	124.879	1.8413	0.0297355	0.779979	No	PREDICTED: uncharacterized protein LOC105170351	Sesamum indicum	NA	NA	NA	NA	NA
TR35089|c0_g1_i1	1065.1	3812.47	1.83974	0.0121249	0.564159	No	PREDICTED: CBS domain-containing protein CBSX3, mitochondrial-like	Sesamum indicum	NA	NA	NA	NA	NA
TR19150|c0_g1_i2	54.4529	194.664	1.8379	0.0242782	0.724099	No	PREDICTED: 29 kDa ribonucleoprotein A, chloroplastic	Sesamum indicum	NA	NA	NA	NA	NA
TR30406|c4_g5_i1	37.028	132.224	1.8363	0.0295281	0.781545	No	NA	NA	NA	NA	NA	NA	NA
TR7969|c1_g2_i2	104.55	372.799	1.83421	0.0145721	0.598227	No	NA	NA	NA	NA	NA	NA	NA
TR28929|c0_g2_i1	76.234	271.795	1.83401	0.0190314	0.665606	No	PREDICTED: ethylene-responsive transcription factor RAP2-12-like	Sesamum indicum	NA	NA	NA	NA	NA
TR37708|c0_g4_i5	76.234	271.795	1.83401	0.0190314	0.666049	No	PREDICTED: probable membrane-associated kinase regulator 1	Sesamum indicum	NA	NA	NA	NA	NA
TR39227|c1_g2_i2	315.827	1125.74	1.83367	0.00753691	0.484118	No	PREDICTED: F-box protein At3g07870-like	Sesamum indicum	NA	NA	NA	NA	NA
TR2973|c0_g1_i1	47.9185	170.79	1.83357	0.0266182	0.752958	No	BEL29 protein	Solanum etuberosum	NA	NA	NA	NA	NA
TR30584|c1_g1_i7	163.359	582.155	1.83336	0.0100603	0.528826	No	NA	NA	NA	NA	NA	NA	NA
TR33246|c2_g2_i7	272.264	969.646	1.83245	0.00784278	0.487131	No	PREDICTED: lysine histidine transporter-like 8	Sesamum indicum	NA	NA	NA	NA	NA
TR42643|c1_g12_i1	39.2061	139.57	1.83184	0.0292604	0.776019	No	NA	NA	NA	NA	NA	NA	NA
TR42093|c0_g2_i1	19.603	69.7851	1.83184	0.0299814	0.780213	No	cytochrome P450 CYP71AU51	Salvia miltiorrhiza	NA	NA	metal ion binding[GO:0046872] ; oxidoreductase activity[GO:0016491]	membrane[GO:0016020]	NA
TR41097|c2_g7_i1	19.603	69.7851	1.83184	0.0299814	0.779058	No	NA	NA	NA	NA	NA	NA	NA
TR41964|c0_g7_i2	19.603	69.7851	1.83184	0.0299814	0.779443	No	hypothetical protein MIMGU_mgv1a014097mg	Mimulus guttatus	NA	cell redox homeostasis[GO:0045454] ; glycerol ether metabolic process[GO:0006662] ; oxidation-reduction process[GO:0055114]	protein disulfide oxidoreductase activity[GO:0015035]	cell[GO:0005623]	NA
TR33160|c0_g3_i1	19.603	69.7851	1.83184	0.0299814	0.779828	No	NA	NA	NA	NA	NA	NA	NA
TR36661|c0_g8_i1	30.4936	108.351	1.82913	0.0319305	0.797822	No	NA	NA	NA	NA	NA	NA	NA
TR27529|c3_g1_i8	124.153	440.748	1.82784	0.0127315	0.576102	No	NA	NA	NA	NA	NA	NA	NA
TR15638|c1_g1_i1	41.3842	146.916	1.82784	0.0289604	0.774695	No	glycosyl hydrolase family 10 protein	Medicago truncatula	NA	NA	hydrolase activity[GO:0016787]	NA	NA
TR26387|c0_g1_i7	41.3842	146.916	1.82784	0.0289604	0.774302	No	unnamed protein product	Coffea canephora	NA	metabolic process[GO:0008152]	oxidoreductase activity[GO:0016491]	NA	NA
TR40235|c0_g6_i3	291.867	1035.76	1.8273	0.00786478	0.487348	No	PREDICTED: photosynthetic NDH subunit of subcomplex B 2, chloroplastic	Erythranthe guttatus	NA	NA	NA	NA	NA
TR37399|c0_g1_i1	52.2748	185.481	1.82709	0.025841	0.744976	No	NA	NA	NA	NA	NA	NA	NA
TR37483|c1_g2_i1	137.221	486.659	1.82641	0.0117407	0.557615	No	basic helix-loop-helix transcription factor	Salvia miltiorrhiza	NA	NA	protein dimerization activity[GO:0046983]	NA	NA
TR35137|c0_g1_i5	54.4529	192.827	1.82423	0.0254075	0.73651	No	hypothetical protein MIMGU_mgv1a007956mg	Mimulus guttatus	NA	transmembrane transport[GO:0055085]	transmembrane transporter activity[GO:0022857]	integral component of membrane[GO:0016021]	NA
TR36450|c1_g2_i4	54.4529	192.827	1.82423	0.0254075	0.736105	No	PREDICTED: isoflavone reductase homolog	Erythranthe guttatus	NA	NA	NA	NA	NA
TR41250|c0_g3_i3	21.7812	77.1309	1.82423	0.0317126	0.79464	No	NA	NA	NA	NA	NA	NA	NA
TR33021|c1_g5_i1	21.7812	77.1309	1.82423	0.0317126	0.794262	No	PREDICTED: CBL-interacting protein kinase 23	Sesamum indicum	NA	NA	NA	NA	NA
TR23226|c0_g1_i1	78.4121	277.304	1.82232	0.019428	0.669256	No	hypothetical protein MIMGU_mgv1a000405mg	Mimulus guttatus	NA	NA	NA	NA	NA
TR35367|c1_g8_i5	180.784	639.085	1.82174	0.00990721	0.524445	No	NA	NA	NA	NA	NA	NA	NA
TR34225|c0_g1_i4	178.605	629.902	1.81835	0.0101218	0.529422	No	PREDICTED: uncharacterized protein LOC105177106	Sesamum indicum	NA	NA	NA	NA	NA
TR28752|c0_g1_i1	47.9185	168.953	1.81797	0.0279654	0.765574	No	PREDICTED: loricrin-like	Erythranthe guttatus	NA	NA	NA	NA	NA
TR8046|c0_g1_i1	23.9593	84.4767	1.81797	0.032927	0.809663	No	NA	NA	NA	NA	NA	NA	NA
TR29753|c0_g1_i1	108.906	383.818	1.81734	0.0149965	0.605273	No	hypothetical protein MIMGU_mgv1a008735mg	Mimulus guttatus	NA	NA	NA	NA	NA
TR32030|c0_g1_i13	37.028	130.388	1.81612	0.0313568	0.795565	No	hypothetical protein MIMGU_mgv1a013063mg	Mimulus guttatus	NA	vesicle-mediated transport[GO:0016192]	NA	integral component of membrane[GO:0016021]	NA
TR41286|c1_g1_i3	248.305	874.15	1.81577	0.00868141	0.510333	No	PREDICTED: probable LRR receptor-like serine/threonine-protein kinase At3g47570	Nicotiana sylvestris	NA	NA	NA	NA	NA
TR42762|c0_g2_i1	76.234	268.122	1.81438	0.0204292	0.6806	No	hypothetical protein MIMGU_mgv1a024732mg, partial	Mimulus guttatus	NA	NA	NA	NA	NA
TR27298|c0_g2_i1	130.687	459.113	1.81273	0.01294	0.58104	No	NA	NA	NA	NA	NA	NA	NA
TR25549|c0_g1_i1	65.3435	229.556	1.81273	0.0231567	0.709532	No	caleosin B	Sesamum indicum	NA	NA	NA	integral component of membrane[GO:0016021]	NA
TR37194|c1_g1_i5	39.2061	137.734	1.81273	0.0309933	0.789004	No	tetraspanin-like protein	Solanum demissum	NA	NA	NA	integral component of membrane[GO:0016021]	NA
TR28876|c1_g1_i2	26.1374	91.8225	1.81273	0.0337697	0.81666	No	unnamed protein product	Vitis vinifera	NA	NA	NA	NA	NA
TR14968|c0_g1_i1	26.1374	91.8225	1.81273	0.0337697	0.816285	No	unnamed protein product	Coffea canephora	NA	protein phosphorylation[GO:0006468]	ATP binding[GO:0005524] ; protein serine/threonine kinase activity[GO:0004674]	integral component of membrane[GO:0016021]	NA
TR36965|c1_g8_i2	26.1374	91.8225	1.81273	0.0337697	0.81591	No	PREDICTED: uncharacterized protein LOC105176787	Sesamum indicum	NA	NA	NA	NA	NA
TR41203|c2_g4_i1	26.1374	91.8225	1.81273	0.0337697	0.815536	No	PREDICTED: probable mitochondrial chaperone BCS1-B	Sesamum indicum	NA	NA	NA	NA	NA
TR36357|c0_g1_i1	13.0687	45.9113	1.81273	0.0207183	0.68503	No	PREDICTED: serine/threonine protein phosphatase 2A 55 kDa regulatory subunit B beta isoform-like isoform X2	Sesamum indicum	NA	NA	NA	NA	NA
TR39434|c0_g1_i1	13.0687	45.9113	1.81273	0.0207183	0.68546	No	PREDICTED: carbon catabolite repressor protein 4 homolog 1-like	Sesamum indicum	NA	NA	NA	NA	NA
TR44053|c1_g6_i1	13.0687	45.9113	1.81273	0.0207183	0.684171	No	hypothetical protein MIMGU_mgv1a003986mg	Mimulus guttatus	NA	carbohydrate metabolic process[GO:0005975]	phosphoacetylglucosamine mutase activity[GO:0004610]	NA	map01130:Biosynthesis of antibiotics(mutase[ec:5.4.2.3]) ; map00520:Amino sugar and nucleotide sugar metabolism(mutase[ec:5.4.2.3])
TR41028|c0_g9_i1	13.0687	45.9113	1.81273	0.0207183	0.6846	No	NA	NA	NA	NA	NA	NA	NA
TR35367|c1_g8_i6	174.249	611.538	1.81129	0.0105816	0.535908	No	PREDICTED: probable WRKY transcription factor 70	Sesamum indicum	NA	NA	NA	NA	NA
TR43014|c4_g1_i1	148.112	519.715	1.81103	0.0117905	0.558469	No	cytokinin binding protein CBP57	Nicotiana sylvestris	NA	one-carbon metabolic process[GO:0006730]	adenosylhomocysteinase activity[GO:0004013]	NA	map00270:Cysteine and methionine metabolism(S-adenosylhomocysteine synthase[ec:3.3.1.1])
TR39778|c0_g1_i4	82.7684	290.159	1.80969	0.0195321	0.671964	No	PREDICTED: 60S acidic ribosomal protein P1-like	Sesamum indicum	NA	NA	NA	NA	NA
TR23226|c0_g1_i2	69.6997	244.248	1.80912	0.0223126	0.699123	No	NA	NA	NA	NA	NA	NA	NA
TR3810|c0_g1_i1	84.9465	297.505	1.80829	0.0192561	0.665947	No	PREDICTED: LOW QUALITY PROTEIN: transcription factor UNE10-like	Sesamum indicum	NA	NA	NA	NA	NA
TR31911|c0_g2_i1	28.3155	99.1683	1.80829	0.0341616	0.810141	No	PREDICTED: ras-related protein RABA1f-like	Citrus sinensis	NA	small GTPase mediated signal transduction[GO:0007264] ; protein transport[GO:0015031]	GTP binding[GO:0005525]	intracellular[GO:0005622]	NA
TR38734|c0_g3_i1	28.3155	99.1683	1.80829	0.0341616	0.809777	No	NA	NA	NA	NA	NA	NA	NA
TR39035|c0_g1_i3	572.844	2005.4	1.80768	0.00908046	0.506113	No	endopeptidase 1	Plantago major	NA	proteolysis[GO:0006508]	peptidase activity[GO:0008233]	NA	NA
TR38734|c0_g2_i1	43.5623	152.425	1.80695	0.0302044	0.782537	No	hypothetical protein PRUPE_ppa006138mg	Prunus persica	NA	metabolic process[GO:0008152]	catalytic activity[GO:0003824]	plant-type cell wall[GO:0009505]	NA
TR35250|c1_g1_i1	261.374	914.552	1.80695	0.00884327	0.514678	No	PREDICTED: uncharacterized protein LOC104230835, partial	Nicotiana sylvestris	NA	NA	NA	NA	NA
TR3571|c0_g1_i2	74.0559	258.939	1.80593	0.0215322	0.694502	No	PREDICTED: uncharacterized protein LOC105172092	Sesamum indicum	NA	NA	NA	NA	NA
TR38344|c0_g2_i1	74.0559	258.939	1.80593	0.0215322	0.694928	No	PREDICTED: THO complex subunit 4A	Sesamum indicum	NA	NA	NA	NA	NA
TR25466|c0_g1_i1	30.4936	106.514	1.80447	0.0342203	0.810074	No	NA	NA	NA	NA	NA	NA	NA
TR30528|c0_g2_i1	30.4936	106.514	1.80447	0.0342203	0.810438	No	hypothetical protein MIMGU_mgv1a016279mg	Mimulus guttatus	NA	protein folding[GO:0006457]	unfolded protein binding[GO:0051082]	prefoldin complex[GO:0016272]	NA
TR34220|c0_g4_i5	15.2468	53.2571	1.80447	0.026469	0.749947	No	PREDICTED: uncharacterized protein LOC105156381	Sesamum indicum	NA	NA	NA	NA	NA
TR4018|c1_g1_i2	108.906	380.145	1.80347	0.0158418	0.617617	No	PREDICTED: protein CURVATURE THYLAKOID 1A, chloroplastic-like	Sesamum indicum	NA	NA	NA	NA	NA
TR41901|c0_g1_i1	47.9185	167.117	1.8022	0.0293839	0.77851	No	PREDICTED: LOW QUALITY PROTEIN: zeaxanthin epoxidase, chloroplastic	Sesamum indicum	NA	NA	NA	NA	NA
TR24922|c0_g1_i1	176.427	615.211	1.80201	0.0109127	0.54276	No	PREDICTED: probable glutathione S-transferase parC isoform 1	Vitis vinifera	NA	toxin catabolic process[GO:0009407] ; glutathione metabolic process[GO:0006749]	glutathione transferase activity[GO:0004364]	cytoplasm[GO:0005737]	map00480:Glutathione metabolism(transferase[ec:2.5.1.18]) ; map00982:Drug metabolism - cytochrome P450(transferase[ec:2.5.1.18]) ; map00980:Metabolism of xenobiotics by cytochrome P450(transferase[ec:2.5.1.18])
TR37193|c1_g1_i2	257.018	896.188	1.80193	0.00908328	0.505735	No	PREDICTED: 60S ribosomal protein L7a	Sesamum indicum	NA	NA	NA	NA	NA
TR23560|c0_g1_i1	261.374	910.879	1.80115	0.00906026	0.506058	No	hypothetical protein MIMGU_mgv1a025199mg, partial	Mimulus guttatus	NA	NA	NA	NA	NA
TR10099|c0_g1_i1	32.6717	113.86	1.80115	0.0340494	0.811867	No	NA	NA	NA	NA	NA	NA	NA
TR3237|c0_g1_i3	117.618	409.528	1.79985	0.0149764	0.605391	No	PREDICTED: uncharacterized protein LOC105175296	Sesamum indicum	NA	NA	NA	NA	NA
TR39534|c4_g1_i4	135.043	470.131	1.79964	0.0132747	0.584611	No	NA	NA	NA	NA	NA	NA	NA
TR3247|c1_g4_i2	67.5216	235.066	1.79964	0.0236361	0.714249	No	hypothetical protein MIMGU_mgv1a015249mg	Mimulus guttatus	NA	response to biotic stimulus[GO:0009607] ; defense response[GO:0006952]	NA	NA	NA
TR42392|c1_g1_i5	34.8498	121.206	1.79823	0.0337263	0.816736	No	PREDICTED: protein TRANSPORT INHIBITOR RESPONSE 1-like	Sesamum indicum	NA	NA	NA	NA	NA
TR44440|c0_g4_i1	17.4249	60.6029	1.79823	0.0304247	0.786309	No	hypothetical protein MIMGU_mgv1a000534mg	Mimulus guttatus	NA	isoleucyl-tRNA aminoacylation[GO:0006428] ; regulation of translational fidelity[GO:0006450]	isoleucine-tRNA ligase activity[GO:0004822] ; aminoacyl-tRNA editing activity[GO:0002161] ; ATP binding[GO:0005524]	cytoplasm[GO:0005737]	map00970:Aminoacyl-tRNA biosynthesis(ligase[ec:6.1.1.5])
TR30341|c0_g1_i1	74.0559	257.103	1.79566	0.0223323	0.699324	No	PREDICTED: uncharacterized protein At1g76070	Sesamum indicum	NA	NA	NA	NA	NA
TR8143|c4_g3_i1	37.028	128.552	1.79566	0.0333086	0.812973	No	NA	NA	NA	NA	NA	NA	NA
TR41569|c0_g3_i1	37.028	128.552	1.79566	0.0333086	0.81335	No	hypothetical protein EUGRSUZ_B02380	Eucalyptus grandis	NA	protein insertion into membrane[GO:0051205]	NA	integral component of membrane[GO:0016021]	NA
TR3435|c2_g1_i5	176.427	611.538	1.79337	0.0113085	0.553558	No	hypothetical protein MIMGU_mgv1a026895mg	Mimulus guttatus	NA	NA	NA	NA	NA
TR30853|c0_g4_i1	98.0152	339.743	1.79337	0.0181062	0.651415	No	PREDICTED: uncharacterized protein LOC105160689	Sesamum indicum	NA	NA	NA	NA	NA
TR40251|c0_g3_i2	58.8091	203.846	1.79337	0.0267211	0.753439	No	NA	NA	NA	NA	NA	NA	NA
TR43449|c1_g2_i1	19.603	67.9487	1.79337	0.0330053	0.810454	No	NA	NA	NA	NA	NA	NA	NA
TR43736|c3_g7_i1	19.603	67.9487	1.79337	0.0330053	0.810832	No	STYLOSA protein	Antirrhinum majus	NA	NA	NA	NA	NA
TR33859|c0_g2_i5	19.603	67.9487	1.79337	0.0330053	0.810076	No	PREDICTED: potassium/sodium hyperpolarization-activated cyclic nucleotide-gated channel 4	Sesamum indicum	NA	NA	NA	NA	NA
TR33283|c0_g1_i5	100.193	347.089	1.79252	0.0178196	0.648189	No	PREDICTED: uncharacterized protein LOC105168965	Sesamum indicum	NA	NA	NA	NA	NA
TR34142|c0_g7_i1	322.361	1116.56	1.79231	0.00891603	0.514366	No	pathogenesis-related protein 10	Salvia miltiorrhiza	NA	response to biotic stimulus[GO:0009607] ; defense response[GO:0006952]	NA	NA	NA
TR44593|c0_g1_i10	413.842	1432.43	1.79131	0.00887112	0.514593	No	PREDICTED: probable LRR receptor-like serine/threonine-protein kinase At1g06840	Sesamum indicum	NA	NA	NA	NA	NA
TR39219|c0_g4_i1	41.3842	143.243	1.79131	0.0323453	0.804371	No	hypothetical protein MIMGU_mgv1a004994mg	Mimulus guttatus	NA	oxidation-reduction process[GO:0055114]	oxidoreductase activity, acting on the aldehyde or oxo group of donors, NAD or NADP as acceptor[GO:0016620]	NA	NA
TR43270|c0_g4_i2	63.1653	218.538	1.79068	0.025625	0.740776	No	hypothetical protein MIMGU_mgv1a002006mg	Mimulus guttatus	NA	oxidation-reduction process[GO:0055114] ; amine metabolic process[GO:0009308]	copper ion binding[GO:0005507] ; quinone binding[GO:0048038] ; primary amine oxidase activity[GO:0008131]	NA	map00260:Glycine, serine and threonine metabolism(oxidase[ec:1.4.3.21]) ; map00350:Tyrosine metabolism(oxidase[ec:1.4.3.21]) ; map00410:beta-Alanine metabolism(oxidase[ec:1.4.3.21]) ; map00950:Isoquinoline alkaloid biosynthesis(oxidase[ec:1.4.3.21]) ; map00360:Phenylalanine metabolism(oxidase[ec:1.4.3.21]) ; map00960:Tropane, piperidine and pyridine alkaloid biosynthesis(oxidase[ec:1.4.3.21])
TR38058|c0_g4_i1	87.1246	301.178	1.78946	0.0202334	0.680099	No	hypothetical protein MIMGU_mgv1a010170mg	Mimulus guttatus	NA	NA	NA	NA	NA
TR43302|c2_g2_i1	21.7812	75.2945	1.78946	0.0346611	0.817205	No	PREDICTED: oxysterol-binding protein-related protein 1C-like isoform X2	Sesamum indicum	NA	NA	NA	NA	NA
TR31138|c0_g8_i1	23.9593	82.6403	1.78626	0.0357471	0.823998	No	NA	NA	NA	NA	NA	NA	NA
TR32054|c0_g1_i2	52.2748	179.972	1.78359	0.0297416	0.77975	No	unnamed protein product	Coffea canephora	NA	NA	electron carrier activity[GO:0009055]	NA	NA
TR40900|c0_g9_i5	52.2748	179.972	1.78359	0.0297416	0.779362	No	PREDICTED: protein NRT1/ PTR FAMILY 3.1-like	Sesamum indicum	NA	NA	NA	NA	NA
TR36824|c0_g1_i1	26.1374	89.9861	1.78359	0.0364747	0.83203	No	hypothetical protein MIMGU_mgv1a013675mg	Mimulus guttatus	NA	NA	NA	integral component of membrane[GO:0016021]	NA
TR28305|c0_g1_i4	26.1374	89.9861	1.78359	0.0364747	0.83239	No	PREDICTED: F-box protein At2g27310	Sesamum indicum	NA	NA	NA	NA	NA
TR29125|c1_g1_i6	272.264	936.59	1.78241	0.00966498	0.518395	No	NA	NA	NA	NA	NA	NA	NA
TR29269|c0_g1_i1	137.221	471.968	1.78218	0.0140627	0.592557	No	PREDICTED: uncharacterized protein LOC105169499	Sesamum indicum	NA	NA	NA	NA	NA
TR30573|c0_g1_i3	167.715	576.645	1.78167	0.0122395	0.566988	No	PREDICTED: uncharacterized protein LOC105177798	Sesamum indicum	NA	NA	NA	NA	NA
TR2800|c0_g3_i1	56.631	194.664	1.78132	0.0285215	0.767239	No	PREDICTED: dihydroflavonol-4-reductase-like	Sesamum indicum	NA	NA	NA	NA	NA
TR39106|c1_g4_i5	60.9872	209.355	1.77937	0.0273004	0.759209	No	PREDICTED: protein phosphatase methylesterase 1-like	Nicotiana sylvestris	NA	NA	NA	NA	NA
TR24806|c0_g5_i2	30.4936	104.678	1.77937	0.036689	0.834751	No	PREDICTED: protein TIME FOR COFFEE	Sesamum indicum	NA	NA	NA	NA	NA
TR40005|c0_g4_i1	189.496	650.103	1.7785	0.0115311	0.555168	No	NA	NA	NA	NA	NA	NA	NA
TR32460|c0_g3_i2	2463.45	8445.83	1.77756	0.0333828	0.812525	No	hypothetical protein B456_003G125200	Gossypium raimondii	NA	NA	NA	NA	NA
TR30882|c0_g2_i1	165.537	567.463	1.77737	0.0125585	0.572701	No	PREDICTED: phosphoethanolamine N-methyltransferase-like isoform X2	Sesamum indicum	NA	NA	NA	NA	NA
TR2184|c0_g4_i1	67.5216	231.393	1.77692	0.0255696	0.739581	No	NA	NA	NA	NA	NA	NA	NA
TR43042|c1_g1_i1	34.8498	119.369	1.77621	0.0359356	0.826175	No	PREDICTED: receptor-like protein 12	Erythranthe guttatus	NA	NA	NA	NA	NA
TR44593|c0_g1_i9	322.361	1103.71	1.77561	0.0095485	0.515296	No	PREDICTED: probable LRR receptor-like serine/threonine-protein kinase At1g06840	Sesamum indicum	NA	NA	NA	NA	NA
TR41121|c0_g6_i1	37.028	126.715	1.7749	0.0353923	0.819046	No	hypothetical protein MIMGU_mgv1a002934mg	Mimulus guttatus	NA	NA	NA	NA	NA
TR38992|c0_g1_i1	39.2061	134.061	1.77374	0.0348022	0.819796	No	PREDICTED: NAC domain-containing protein 72-like	Sesamum indicum	NA	NA	NA	NA	NA
TR3838|c0_g1_i2	39.2061	134.061	1.77374	0.0348022	0.81943	No	PREDICTED: lysine histidine transporter 1-like	Sesamum indicum	NA	NA	NA	NA	NA
TR39384|c1_g5_i1	82.7684	282.813	1.7727	0.0223106	0.699477	No	hypothetical protein JCGZ_18736	Jatropha curcas	NA	oxidation-reduction process[GO:0055114]	zinc ion binding[GO:0008270] ; oxidoreductase activity[GO:0016491]	NA	NA
TR30920|c1_g1_i4	41.3842	141.407	1.7727	0.0341968	0.810247	No	PREDICTED: uncharacterized protein LOC105164048	Sesamum indicum	NA	NA	NA	NA	NA
TR35502|c1_g2_i3	87.1246	297.505	1.77176	0.0215768	0.694664	No	PREDICTED: caffeoylshikimate esterase-like	Sesamum indicum	NA	NA	NA	NA	NA
TR27529|c3_g1_i5	43.5623	148.752	1.77176	0.0335986	0.814767	No	NA	NA	NA	NA	NA	NA	NA
TR41296|c1_g2_i2	43.5623	148.752	1.77176	0.0335986	0.814392	No	NA	NA	NA	NA	NA	NA	NA
TR39653|c0_g5_i1	45.7404	156.098	1.77091	0.0330235	0.810144	No	hypothetical protein MIMGU_mgv1a005592mg	Mimulus guttatus	NA	metabolic process[GO:0008152]	GTP binding[GO:0005525] ; GTPase activity[GO:0003924]	cytoplasm[GO:0005737]	NA
TR28420|c0_g2_i2	47.9185	163.444	1.77014	0.032451	0.804721	No	hypothetical protein MIMGU_mgv1a0146781mg, partial	Mimulus guttatus	NA	NA	NA	integral component of membrane[GO:0016021]	NA
TR30771|c1_g1_i1	47.9185	163.444	1.77014	0.032451	0.804342	No	hypothetical protein MIMGU_mgv1a0189871mg, partial	Mimulus guttatus	NA	NA	NA	integral component of membrane[GO:0016021]	NA
TR33246|c2_g2_i8	257.018	874.15	1.76601	0.0105423	0.537533	No	hypothetical protein BVRB_7g177210	Beta vulgaris subsp. vulgaris	NA	NA	binding[GO:0005488]	membrane[GO:0016020]	NA
TR33439|c0_g4_i1	2315.34	7872.86	1.76567	0.0321628	0.801347	No	PREDICTED: chlorophyll a-b binding protein of LHCII type 1-like	Glycine max	NA	response to light stimulus[GO:0009416] ; protein-chromophore linkage[GO:0018298] ; photosynthesis, light harvesting in photosystem I[GO:0009768]	chlorophyll binding[GO:0016168] ; pigment binding[GO:0031409]	integral component of membrane[GO:0016021] ; chloroplast envelope[GO:0009941] ; chloroplast thylakoid membrane[GO:0009535] ; photosystem II[GO:0009523] ; plastoglobule[GO:0010287]	NA
TR35227|c1_g4_i4	714.422	2427.79	1.76479	0.0117981	0.558325	No	NA	NA	NA	NA	NA	NA	NA
TR37930|c0_g1_i3	923.521	3136.66	1.76401	0.0138617	0.593585	No	PREDICTED: sugar carrier protein C	Sesamum indicum	NA	NA	NA	NA	NA
TR29516|c1_g1_i3	82.7684	280.977	1.7633	0.0230692	0.709327	No	hypothetical protein MIMGU_mgv1a022715mg	Mimulus guttatus	NA	NA	NA	NA	NA
TR35183|c0_g1_i1	82.7684	280.977	1.7633	0.0230692	0.708913	No	PREDICTED: inorganic phosphate transporter 1-4-like	Sesamum indicum	NA	NA	NA	NA	NA
TR37743|c2_g1_i2	167.715	569.3	1.76318	0.0131946	0.583519	No	PREDICTED: uncharacterized protein LOC105162071	Sesamum indicum	NA	NA	NA	NA	NA
TR44593|c0_g1_i1	172.071	583.991	1.76294	0.0130008	0.580804	No	hypothetical protein PRUPE_ppa000952mg	Prunus persica	NA	protein phosphorylation[GO:0006468]	ATP binding[GO:0005524] ; protein serine/threonine kinase activity[GO:0004674]	integral component of membrane[GO:0016021]	NA
TR27945|c1_g1_i2	156.824	530.734	1.75884	0.0140119	0.591362	No	NA	NA	NA	NA	NA	NA	NA
TR38762|c0_g3_i4	165.537	560.117	1.75858	0.0135519	0.591375	No	NA	NA	NA	NA	NA	NA	NA
TR40973|c1_g1_i1	337.608	1138.6	1.75384	0.0103627	0.534062	No	hypothetical protein MIMGU_mgv1a002252mg	Mimulus guttatus	NA	transmembrane transport[GO:0055085]	NA	integral component of membrane[GO:0016021]	NA
TR34371|c2_g1_i3	263.552	888.842	1.75384	0.0109871	0.544917	No	PREDICTED: uncharacterized protein LOC105165426	Sesamum indicum	NA	NA	NA	NA	NA
TR32606|c0_g1_i2	217.812	734.58	1.75384	0.0118726	0.558841	No	PREDICTED: UDP-glycosyltransferase 74E2-like	Sesamum indicum	NA	NA	NA	NA	NA
TR26704|c1_g1_i2	117.618	396.673	1.75384	0.0179601	0.648819	No	PREDICTED: plasma membrane ATPase 4-like	Sesamum indicum	NA	NA	NA	NA	NA
TR32399|c0_g1_i3	60.9872	205.682	1.75384	0.0297211	0.779991	No	NA	NA	NA	NA	NA	NA	NA
TR41709|c0_g1_i1	60.9872	205.682	1.75384	0.0297211	0.78038	No	PREDICTED: protein TRM32 isoform X1	Sesamum indicum	NA	NA	NA	NA	NA
TR22657|c0_g3_i1	58.8091	198.337	1.75384	0.0304476	0.785746	No	NA	NA	NA	NA	NA	NA	NA
TR22821|c0_g1_i2	54.4529	183.645	1.75384	0.0319348	0.797552	No	PREDICTED: elongation factor G-1, chloroplastic	Sesamum indicum	NA	NA	NA	NA	NA
TR29491|c1_g1_i4	54.4529	183.645	1.75384	0.0319348	0.797174	No	PREDICTED: probable carboxylesterase 15 isoform X1	Sesamum indicum	NA	NA	NA	NA	NA
TR3440|c0_g3_i2	52.2748	176.299	1.75384	0.0326791	0.808094	No	PREDICTED: uncharacterized protein LOC105954756	Erythranthe guttatus	NA	NA	NA	NA	NA
TR35962|c0_g2_i2	47.9185	161.608	1.75384	0.0341082	0.810336	No	NA	NA	NA	NA	NA	NA	NA
TR38070|c0_g4_i2	43.5623	146.916	1.75384	0.0354495	0.819649	No	PREDICTED: LOW QUALITY PROTEIN: ADP-ribosylation factor-binding protein GGA3	Sesamum indicum	NA	NA	NA	NA	NA
TR35504|c2_g2_i3	39.2061	132.224	1.75384	0.036894	0.837245	No	NA	NA	NA	NA	NA	NA	NA
TR30450|c0_g1_i2	37.028	124.879	1.75384	0.0376176	0.842414	No	hypothetical protein MIMGU_mgv1a015605mg	Mimulus guttatus	NA	NA	NA	integral component of membrane[GO:0016021]	NA
TR32667|c1_g2_i1	34.8498	117.533	1.75384	0.0383021	0.852666	No	PREDICTED: uncharacterized protein LOC105969080	Erythranthe guttatus	NA	NA	NA	NA	NA
TR26261|c0_g1_i2	32.6717	110.187	1.75384	0.0389016	0.859473	No	Uncharacterized protein TCM_029816	Theobroma cacao	NA	NA	NA	integral component of membrane[GO:0016021]	NA
TR32189|c0_g4_i7	32.6717	110.187	1.75384	0.0389016	0.860195	No	PREDICTED: uncharacterized protein LOC104115794	Nicotiana tomentosiformis	NA	NA	NA	NA	NA
TR38821|c1_g2_i5	32.6717	110.187	1.75384	0.0389016	0.859113	No	NA	NA	NA	NA	NA	NA	NA
TR32846|c1_g3_i5	32.6717	110.187	1.75384	0.0389016	0.859834	No	NA	NA	NA	NA	NA	NA	NA
TR34671|c0_g1_i4	30.4936	102.841	1.75384	0.0393521	0.863271	No	NA	NA	NA	NA	NA	NA	NA
TR28985|c3_g1_i3	28.3155	95.4954	1.75384	0.0395651	0.860063	No	hypothetical protein MIMGU_mgv1a023077mg	Mimulus guttatus	NA	NA	NA	NA	NA
TR28901|c0_g2_i4	26.1374	88.1496	1.75384	0.0394193	0.862948	No	PREDICTED: bromo adjacent homology domain-containing 1 protein isoform X2	Sesamum indicum	NA	NA	NA	NA	NA
TR43015|c0_g1_i6	26.1374	88.1496	1.75384	0.0394193	0.862231	No	hypothetical protein MIMGU_mgv1a026830mg	Mimulus guttatus	NA	NA	kinase activity[GO:0016301]	NA	NA
TR7956|c2_g1_i1	26.1374	88.1496	1.75384	0.0394193	0.86259	No	expansin	Rehmannia glutinosa	NA	plant-type cell wall organization[GO:0009664]	NA	extracellular region[GO:0005576] ; cell wall[GO:0005618] ; membrane[GO:0016020]	NA
TR20055|c0_g1_i1	23.9593	80.8038	1.75384	0.0388506	0.859789	No	PREDICTED: protein SGT1 homolog At5g65490-like	Sesamum indicum	NA	NA	NA	NA	NA
TR36626|c0_g8_i4	23.9593	80.8038	1.75384	0.0388506	0.859428	No	NA	NA	NA	NA	NA	NA	NA
TR21282|c1_g1_i2	21.7812	73.458	1.75384	0.0379296	0.846521	No	PREDICTED: elongation factor G-2, chloroplastic	Musa acuminata subsp. malaccensis	NA	NA	NA	NA	NA
TR43629|c4_g2_i3	21.7812	73.458	1.75384	0.0379296	0.846162	No	PREDICTED: uncharacterized protein At4g22160	Sesamum indicum	NA	NA	NA	NA	NA
TR42738|c1_g1_i1	19.603	66.1122	1.75384	0.0363857	0.831441	No	NA	NA	NA	NA	NA	NA	NA
TR30607|c1_g8_i1	19.603	66.1122	1.75384	0.0363857	0.832163	No	NA	NA	NA	NA	NA	NA	NA
TR41901|c0_g4_i5	19.603	66.1122	1.75384	0.0363857	0.831802	No	zeaxanthin epoxidase 1	Erythranthe lewisii	NA	oxidation-reduction process[GO:0055114] ; abscisic acid biosynthetic process[GO:0009688]	zeaxanthin epoxidase activity[GO:0052662] ; antheraxanthin epoxidase activity[GO:0052663] ; zeaxanthin epoxidase [overall] activity[GO:0009540] ; FAD binding[GO:0071949]	chloroplast[GO:0009507] ; membrane[GO:0016020]	map00906:Carotenoid biosynthesis(epoxidase[ec:1.14.13.90])
TR32199|c0_g2_i4	19.603	66.1122	1.75384	0.0363857	0.832524	No	hypothetical protein MIMGU_mgv1a011111mg	Mimulus guttatus	NA	protein phosphorylation[GO:0006468]	protein kinase activity[GO:0004672] ; ATP binding[GO:0005524]	NA	NA
TR36232|c0_g11_i1	17.4249	58.7664	1.75384	0.0338081	0.815716	No	PREDICTED: uncharacterized protein LOC105173891	Sesamum indicum	NA	NA	NA	NA	NA
TR18830|c0_g1_i2	17.4249	58.7664	1.75384	0.0338081	0.814597	No	PREDICTED: AP-4 complex subunit epsilon	Sesamum indicum	NA	NA	NA	NA	NA
TR19034|c0_g1_i1	17.4249	58.7664	1.75384	0.0338081	0.815343	No	hypothetical protein MIMGU_mgv1a002562mg	Mimulus guttatus	NA	NA	NA	integral component of membrane[GO:0016021]	NA
TR40164|c0_g2_i5	17.4249	58.7664	1.75384	0.0338081	0.81497	No	hypothetical protein MIMGU_mgv1a010987mg	Mimulus guttatus	NA	folic acid-containing compound biosynthetic process[GO:0009396] ; oxidation-reduction process[GO:0055114]	methylenetetrahydrofolate dehydrogenase (NADP+) activity[GO:0004488]	NA	map00670:One carbon pool by folate(dehydrogenase (NADP+)[ec:1.5.1.5]) ; map00720:Carbon fixation pathways in prokaryotes(dehydrogenase (NADP+)[ec:1.5.1.5])
TR43042|c1_g9_i1	17.4249	58.7664	1.75384	0.0338081	0.814224	No	hypothetical protein MIMGU_mgv1a019608mg, partial	Mimulus guttatus	NA	NA	NA	integral component of membrane[GO:0016021]	NA
TR34683|c0_g4_i1	15.2468	51.4206	1.75384	0.0296585	0.782246	No	PREDICTED: nitrilase-like protein 2	Sesamum indicum	NA	NA	NA	NA	NA
TR36911|c0_g4_i2	15.2468	51.4206	1.75384	0.0296585	0.781855	No	NA	NA	NA	NA	NA	NA	NA
TR31489|c0_g3_i1	15.2468	51.4206	1.75384	0.0296585	0.781463	No	NA	NA	NA	NA	NA	NA	NA
TR34084|c0_g4_i2	15.2468	51.4206	1.75384	0.0296585	0.781073	No	hypothetical protein MIMGU_mgv1a010708mg	Mimulus guttatus	NA	oxidation-reduction process[GO:0055114]	oxidoreductase activity[GO:0016491]	NA	NA
TR36197|c0_g3_i2	15.2468	51.4206	1.75384	0.0296585	0.779514	No	PREDICTED: ribose-phosphate pyrophosphokinase 4	Sesamum indicum	NA	NA	NA	NA	NA
TR36904|c0_g10_i1	15.2468	51.4206	1.75384	0.0296585	0.779903	No	hypothetical protein MIMGU_mgv1a014358mg	Mimulus guttatus	NA	small GTPase mediated signal transduction[GO:0007264]	GTP binding[GO:0005525]	intracellular[GO:0005622]	NA
TR43187|c2_g10_i1	15.2468	51.4206	1.75384	0.0296585	0.780292	No	PREDICTED: oligopeptide transporter 5-like	Sesamum indicum	NA	NA	NA	NA	NA
TR20543|c0_g1_i1	15.2468	51.4206	1.75384	0.0296585	0.780682	No	NA	NA	NA	NA	NA	NA	NA
TR43384|c0_g6_i1	15.2468	51.4206	1.75384	0.0296585	0.782638	No	NA	NA	NA	NA	NA	NA	NA
TR34046|c0_g6_i3	10.8906	36.729	1.75384	0.0157421	0.615555	No	PREDICTED: uncharacterized protein LOC105164603	Sesamum indicum	NA	NA	NA	NA	NA
TR44439|c0_g2_i3	202.565	679.487	1.74606	0.0127028	0.575295	No	PREDICTED: alpha-glucan water dikinase, chloroplastic-like	Sesamum indicum	NA	NA	NA	NA	NA
TR35019|c0_g2_i12	100.193	336.07	1.74598	0.021245	0.691164	No	PREDICTED: uncharacterized protein LOC103928328 isoform X2	Pyrus x bretschneideri	NA	NA	NA	NA	NA
TR23138|c0_g1_i1	1847.04	6188.84	1.74445	0.0269193	0.756196	No	NA	NA	NA	NA	NA	NA	NA
TR43624|c0_g1_i1	320.183	1072.49	1.74399	0.010873	0.541809	No	PREDICTED: pleiotropic drug resistance protein 1-like	Sesamum indicum	NA	NA	NA	NA	NA
TR19069|c0_g1_i1	764.518	2560.01	1.74353	0.013193	0.58394	No	NA	NA	NA	NA	NA	NA	NA
TR30878|c0_g1_i1	143.756	481.15	1.74287	0.0158765	0.618057	No	NA	NA	NA	NA	NA	NA	NA
TR30451|c0_g2_i6	254.839	852.113	1.74146	0.0116951	0.557459	No	NA	NA	NA	NA	NA	NA	NA
TR9922|c0_g3_i1	117.618	393	1.74042	0.0189219	0.664867	No	PREDICTED: ankyrin repeat-containing protein At5g02620-like	Sesamum indicum	NA	NA	NA	NA	NA
TR37910|c0_g1_i1	50.0967	167.117	1.73807	0.0350705	0.81626	No	PREDICTED: cellulose synthase A catalytic subunit 1 [UDP-forming]	Sesamum indicum	NA	NA	NA	NA	NA
TR41461|c0_g1_i5	50.0967	167.117	1.73807	0.0350705	0.816621	No	PREDICTED: uncharacterized WD repeat-containing protein C2A9.03-like	Solanum tuberosum	NA	NA	NA	NA	NA
TR2250|c2_g2_i2	246.127	820.893	1.73779	0.0120274	0.563109	No	Sal m 1 allergen	Salvia miltiorrhiza	NA	response to biotic stimulus[GO:0009607] ; defense response[GO:0006952]	NA	NA	NA
TR34640|c1_g2_i4	98.0152	326.888	1.73772	0.0223009	0.699591	No	PREDICTED: uncharacterized protein LOC105166004	Sesamum indicum	NA	NA	NA	NA	NA
TR43014|c4_g3_i4	241.771	806.202	1.7375	0.0121268	0.563754	No	unnamed protein product	Coffea canephora	NA	one-carbon metabolic process[GO:0006730]	adenosylhomocysteinase activity[GO:0004013]	NA	map00270:Cysteine and methionine metabolism(S-adenosylhomocysteine synthase[ec:3.3.1.1])
TR39520|c1_g7_i5	879.959	2929.14	1.73497	0.0147808	0.603505	No	PREDICTED: aspartic proteinase-like isoform X1	Sesamum indicum	NA	NA	NA	NA	NA
TR39786|c0_g1_i3	82.7684	275.468	1.73473	0.0255144	0.738796	No	PREDICTED: uncharacterized aarF domain-containing protein kinase At1g79600, chloroplastic	Sesamum indicum	NA	NA	NA	NA	NA
TR31458|c0_g1_i1	39.2061	130.388	1.73366	0.0391225	0.860384	No	PREDICTED: RING-H2 finger protein ATL66	Sesamum indicum	NA	NA	NA	NA	NA
TR42964|c0_g1_i2	39.2061	130.388	1.73366	0.0391225	0.860743	No	NA	NA	NA	NA	NA	NA	NA
TR43270|c0_g6_i2	219.99	730.907	1.73225	0.0129046	0.580443	No	PREDICTED: primary amine oxidase-like	Sesamum indicum	NA	NA	NA	NA	NA
TR40715|c0_g5_i1	71.8778	238.739	1.73181	0.0285087	0.767679	No	PREDICTED: LOW QUALITY PROTEIN: DELLA protein GAI	Sesamum indicum	NA	NA	NA	NA	NA
TR3983|c0_g1_i4	178.605	593.173	1.73168	0.014425	0.598253	No	PREDICTED: uncharacterized protein LOC105165125	Sesamum indicum	NA	NA	NA	NA	NA
TR31186|c0_g4_i3	34.8498	115.696	1.73112	0.0408377	0.871894	No	NA	NA	NA	NA	NA	NA	NA
TR3571|c1_g2_i2	204.743	679.487	1.73063	0.0134497	0.588867	No	hypothetical protein MIMGU_mgv1a011768mg	Mimulus guttatus	NA	organic substance metabolic process[GO:0071704]	NA	NA	NA
TR27973|c0_g1_i1	67.5216	224.047	1.73038	0.029951	0.780193	No	PREDICTED: uncharacterized protein LOC105175073	Sesamum indicum	NA	NA	NA	NA	NA
TR37031|c0_g1_i4	32.6717	108.351	1.72959	0.0416039	0.869225	No	PREDICTED: uncharacterized protein LOC105159210	Sesamum indicum	NA	NA	NA	NA	NA
TR40708|c1_g2_i10	95.8371	317.706	1.72904	0.0234336	0.710986	No	PREDICTED: zinc finger CCCH domain-containing protein 20-like	Sesamum indicum	NA	NA	NA	NA	NA
TR20420|c0_g2_i2	63.1653	209.355	1.72875	0.0315301	0.79651	No	hypothetical protein MIMGU_mgv1a0014942mg, partial	Mimulus guttatus	NA	vesicle-mediated transport[GO:0016192] ; intracellular protein transport[GO:0006886]	NA	clathrin adaptor complex[GO:0030131]	NA
TR32974|c0_g3_i2	60.9872	202.01	1.72784	0.0323666	0.80452	No	PREDICTED: uncharacterized protein LOC105160600	Sesamum indicum	NA	NA	NA	NA	NA
TR25185|c0_g1_i2	30.4936	101.005	1.72784	0.0422262	0.875629	No	NA	NA	NA	NA	NA	NA	NA
TR34515|c1_g1_i10	30.4936	101.005	1.72784	0.0422262	0.875284	No	PREDICTED: protein CutA, chloroplastic	Sesamum indicum	NA	NA	NA	NA	NA
TR32651|c0_g2_i3	58.8091	194.664	1.72687	0.0332299	0.811804	No	NA	NA	NA	NA	NA	NA	NA
TR42169|c0_g2_i6	87.1246	288.323	1.72653	0.0253512	0.736501	No	PREDICTED: MLO-like protein 1 isoform X3	Sesamum indicum	NA	NA	NA	NA	NA
TR26413|c0_g3_i1	56.631	187.318	1.72583	0.034115	0.810131	No	NA	NA	NA	NA	NA	NA	NA
TR34126|c1_g1_i4	56.631	187.318	1.72583	0.034115	0.809766	No	PREDICTED: membrane-anchored ubiquitin-fold protein 4	Sesamum indicum	NA	NA	NA	NA	NA
TR3986|c0_g3_i7	28.3155	93.659	1.72583	0.0426108	0.87363	No	PREDICTED: short-chain dehydrogenase TIC 32, chloroplastic-like	Prunus mume	NA	NA	NA	NA	NA
TR41911|c1_g6_i2	28.3155	93.659	1.72583	0.0426108	0.874311	No	PREDICTED: myosin-14	Sesamum indicum	NA	NA	NA	NA	NA
TR42989|c1_g10_i1	28.3155	93.659	1.72583	0.0426108	0.87329	No	NA	NA	NA	NA	NA	NA	NA
TR33023|c0_g1_i8	28.3155	93.659	1.72583	0.0426108	0.874992	No	NA	NA	NA	NA	NA	NA	NA
TR44245|c3_g1_i1	28.3155	93.659	1.72583	0.0426108	0.874651	No	PREDICTED: endoglucanase 6	Sesamum indicum	NA	NA	NA	NA	NA
TR35873|c0_g3_i1	28.3155	93.659	1.72583	0.0426108	0.87397	No	PREDICTED: zinc finger protein CONSTANS-LIKE 5-like	Sesamum indicum	NA	NA	NA	NA	NA
TR2849|c1_g1_i1	54.4529	179.972	1.72469	0.0350149	0.817858	No	uncharacterized protein LOC100500014	Glycine max	NA	NA	NA	NA	NA
TR31761|c2_g11_i5	54.4529	179.972	1.72469	0.0350149	0.817495	No	hypothetical protein MIMGU_mgv1a013200mg	Mimulus guttatus	NA	NA	NA	NA	NA
TR41641|c0_g13_i1	52.2748	172.626	1.72347	0.0359202	0.826542	No	PREDICTED: elongation factor 1-gamma 3-like	Setaria italica	NA	NA	NA	NA	NA
TR31725|c0_g1_i3	128.509	424.22	1.72295	0.0187845	0.664025	No	PREDICTED: glucan endo-1,3-beta-glucosidase-like	Sesamum indicum	NA	NA	NA	NA	NA
TR34142|c0_g5_i2	50.0967	165.281	1.72213	0.0368185	0.837336	No	pathogenesis-related protein 10	Salvia miltiorrhiza	NA	response to biotic stimulus[GO:0009607] ; defense response[GO:0006952]	NA	NA	NA
TR43028|c0_g3_i2	121.974	402.183	1.72127	0.0197526	0.676457	No	PREDICTED: tubulin-specific chaperone E-like	Cicer arietinum	NA	NA	NA	NA	NA
TR3969|c0_g3_i5	71.8778	236.902	1.72067	0.0296092	0.781727	No	PREDICTED: U-box domain-containing protein 38-like	Sesamum indicum	NA	NA	NA	NA	NA
TR36149|c2_g6_i1	23.9593	78.9674	1.72067	0.0422695	0.875491	No	NA	NA	NA	NA	NA	NA	NA
TR3959|c2_g2_i1	23.9593	78.9674	1.72067	0.0422695	0.874803	No	PREDICTED: BEL1-like homeodomain protein 1	Sesamum indicum	NA	NA	NA	NA	NA
TR43270|c0_g7_i1	23.9593	78.9674	1.72067	0.0422695	0.87446	No	Amine oxidase [copper-containing] precursor, putative	Ricinus communis	NA	oxidation-reduction process[GO:0055114] ; amine metabolic process[GO:0009308]	copper ion binding[GO:0005507] ; quinone binding[GO:0048038] ; primary amine oxidase activity[GO:0008131]	integral component of membrane[GO:0016021]	map00260:Glycine, serine and threonine metabolism(oxidase[ec:1.4.3.21]) ; map00350:Tyrosine metabolism(oxidase[ec:1.4.3.21]) ; map00410:beta-Alanine metabolism(oxidase[ec:1.4.3.21]) ; map00950:Isoquinoline alkaloid biosynthesis(oxidase[ec:1.4.3.21]) ; map00360:Phenylalanine metabolism(oxidase[ec:1.4.3.21]) ; map00960:Tropane, piperidine and pyridine alkaloid biosynthesis(oxidase[ec:1.4.3.21])
TR7867|c1_g1_i2	23.9593	78.9674	1.72067	0.0422695	0.875147	No	hypothetical protein B456_003G128700	Gossypium raimondii	NA	formation of translation preinitiation complex[GO:0001731] ; regulation of translational initiation[GO:0006446]	translation initiation factor activity[GO:0003743] ; nucleotide binding[GO:0000166]	eukaryotic 43S preinitiation complex[GO:0016282] ; eukaryotic translation initiation factor 3 complex[GO:0005852] ; eukaryotic 48S preinitiation complex[GO:0033290]	NA
TR25912|c0_g1_i3	111.084	365.454	1.71804	0.0216439	0.693013	No	hypothetical protein MIMGU_mgv1a010534mg	Mimulus guttatus	NA	NA	NA	NA	NA
TR44245|c3_g3_i5	130.687	429.729	1.71731	0.0189373	0.664523	No	PREDICTED: endoglucanase 6	Sesamum indicum	NA	NA	NA	NA	NA
TR30099|c0_g3_i1	21.7812	71.6216	1.71731	0.0415576	0.868603	No	NA	NA	NA	NA	NA	NA	NA
TR31324|c0_g4_i6	21.7812	71.6216	1.71731	0.0415576	0.869984	No	PREDICTED: ER membrane protein complex subunit 4	Sesamum indicum	NA	NA	NA	NA	NA
TR33470|c0_g2_i1	21.7812	71.6216	1.71731	0.0415576	0.87033	No	PREDICTED: mannose-1-phosphate guanyltransferase alpha-B	Sesamum indicum	NA	NA	NA	NA	NA
TR39156|c1_g3_i1	21.7812	71.6216	1.71731	0.0415576	0.870676	No	hypothetical protein MIMGU_mgv1a008077mg	Mimulus guttatus	NA	metabolic process[GO:0008152]	NA	NA	NA
TR39618|c0_g1_i8	21.7812	71.6216	1.71731	0.0415576	0.871023	No	PREDICTED: oral cancer-overexpressed protein 1 homolog	Sesamum indicum	NA	NA	NA	NA	NA
TR39639|c0_g4_i2	21.7812	71.6216	1.71731	0.0415576	0.869639	No	PREDICTED: probable pectate lyase 5	Sesamum indicum	NA	NA	NA	NA	NA
TR44609|c8_g8_i1	21.7812	71.6216	1.71731	0.0415576	0.869293	No	Uncharacterized protein TCM_035241	Theobroma cacao	NA	NA	NA	NA	NA
TR51775|c0_g1_i1	21.7812	71.6216	1.71731	0.0415576	0.868948	No	NA	NA	NA	NA	NA	NA	NA
TR32456|c1_g5_i1	21.7812	71.6216	1.71731	0.0415576	0.87137	No	PREDICTED: uncharacterized protein LOC105971639	Erythranthe guttatus	NA	NA	NA	NA	NA
TR34821|c1_g1_i1	191.674	629.902	1.71647	0.0147378	0.602683	No	PREDICTED: NADP-dependent malic enzyme	Sesamum indicum	NA	NA	NA	NA	NA
TR2796|c0_g1_i7	60.9872	200.173	1.71467	0.0337802	0.815415	No	NA	NA	NA	NA	NA	NA	NA
TR9922|c0_g1_i1	117.618	385.655	1.7132	0.0210097	0.686903	No	PREDICTED: ankyrin repeat-containing protein At5g02620-like	Sesamum indicum	NA	NA	NA	NA	NA
TR31725|c1_g2_i2	98.0152	321.379	1.7132	0.0243939	0.723046	No	PREDICTED: glucan endo-1,3-beta-glucosidase, acidic isoform PR-Q'-like	Sesamum indicum	NA	NA	NA	NA	NA
TR38338|c0_g1_i1	39.2061	128.552	1.7132	0.041497	0.871487	No	hypothetical protein MIMGU_mgv1a009538mg	Mimulus guttatus	NA	NA	NA	NA	NA
TR44604|c3_g4_i2	39.2061	128.552	1.7132	0.041497	0.87114	No	PREDICTED: subtilisin-like protease	Sesamum indicum	NA	NA	NA	NA	NA
TR40241|c2_g1_i1	19.603	64.2758	1.7132	0.0401717	0.863273	No	Os04g0319900	Oryza sativa Japonica Group	NA	NA	NA	NA	NA
TR30731|c0_g3_i1	76.234	249.757	1.71202	0.0292491	0.776111	No	NA	NA	NA	NA	NA	NA	NA
TR37483|c1_g2_i2	113.262	370.963	1.71161	0.0218176	0.697727	No	PREDICTED: transcription factor bHLH104	Sesamum indicum	NA	NA	NA	NA	NA
TR42964|c0_g1_i7	74.0559	242.411	1.71077	0.0299807	0.780579	No	NA	NA	NA	NA	NA	NA	NA
TR2756|c4_g4_i10	37.028	121.206	1.71077	0.0425349	0.874797	No	unknown	Lotus japonicus	NA	translational initiation[GO:0006413]	translation initiation factor activity[GO:0003743]	NA	NA
TR39306|c0_g6_i2	37.028	121.206	1.71077	0.0425349	0.874456	No	PREDICTED: diacylglycerol kinase 5	Sesamum indicum	NA	NA	NA	NA	NA
TR40415|c0_g4_i2	37.028	121.206	1.71077	0.0425349	0.875139	No	hypothetical protein MIMGU_mgv1a009442mg	Mimulus guttatus	NA	NA	NA	NA	NA
TR35250|c1_g1_i2	128.509	420.547	1.7104	0.0197234	0.675895	No	PREDICTED: uncharacterized protein LOC104230835, partial	Nicotiana sylvestris	NA	NA	NA	NA	NA
TR35833|c0_g2_i3	283.155	925.571	1.70875	0.0129039	0.580906	No	PREDICTED: putative receptor-like protein kinase At1g72540	Sesamum indicum	NA	NA	NA	NA	NA
TR42728|c1_g8_i3	17.4249	56.93	1.70804	0.0376392	0.842181	No	unnamed protein product	Vitis vinifera	NA	NA	NA	NA	NA
TR36323|c0_g1_i3	189.496	618.884	1.7075	0.0153703	0.612381	No	NA	NA	NA	NA	NA	NA	NA
TR26139|c1_g1_i1	309.292	1010.05	1.70738	0.0126892	0.575177	No	putative metallothionin 2a	Salvia miltiorrhiza	NA	NA	NA	NA	NA
TR30406|c5_g2_i6	67.5216	220.374	1.70653	0.0324299	0.804575	No	NA	NA	NA	NA	NA	NA	NA
TR36450|c1_g2_i1	115.44	376.472	1.7054	0.0219834	0.697524	No	PREDICTED: isoflavone reductase homolog isoform X1	Sesamum indicum	NA	NA	NA	NA	NA
TR42717|c0_g1_i1	32.6717	106.514	1.70493	0.0445104	0.889381	No	PREDICTED: uncharacterized protein LOC105158309	Sesamum indicum	NA	NA	NA	NA	NA
TR32179|c0_g7_i6	32.6717	106.514	1.70493	0.0445104	0.889718	No	PREDICTED: UPF0548 protein At2g17695	Sesamum indicum	NA	NA	NA	NA	NA
TR37399|c2_g1_i1	178.605	582.155	1.70463	0.0160675	0.621816	No	PREDICTED: putative late blight resistance protein homolog R1B-16	Erythranthe guttatus	NA	NA	NA	NA	NA
TR38754|c1_g1_i2	47.9185	156.098	1.7038	0.0396319	0.860096	No	PREDICTED: protein COBRA	Sesamum indicum	NA	NA	NA	NA	NA
TR32099|c0_g2_i1	63.1653	205.682	1.70321	0.0342751	0.811009	No	PREDICTED: glucuronoxylan 4-O-methyltransferase 1-like	Sesamum indicum	NA	NA	NA	NA	NA
TR11704|c0_g2_i1	78.4121	255.267	1.70286	0.0295893	0.781987	No	unnamed protein product	Coffea canephora	NA	NA	NA	NA	NA
TR41451|c2_g1_i1	78.4121	255.267	1.70286	0.0295893	0.781595	No	hypothetical protein MIMGU_mgv1a0070051mg, partial	Mimulus guttatus	NA	transmembrane transport[GO:0055085]	NA	integral component of membrane[GO:0016021]	NA
TR30619|c0_g1_i2	45.7404	148.752	1.70137	0.0406278	0.870235	No	PREDICTED: uncharacterized protein LOC105173291	Sesamum indicum	NA	NA	NA	NA	NA
TR29515|c0_g1_i2	30.4936	99.1683	1.70137	0.0453297	0.894553	No	NA	NA	NA	NA	NA	NA	NA
TR31954|c0_g11_i1	30.4936	99.1683	1.70137	0.0453297	0.894889	No	PREDICTED: uncharacterized protein LOC105170101	Sesamum indicum	NA	NA	NA	NA	NA
TR36896|c0_g4_i1	30.4936	99.1683	1.70137	0.0453297	0.894218	No	PREDICTED: uncharacterized protein LOC105172258	Sesamum indicum	NA	NA	NA	NA	NA
TR35743|c0_g1_i1	15.2468	49.5842	1.70137	0.0333206	0.812138	No	PREDICTED: uncharacterized protein LOC105169314	Sesamum indicum	NA	NA	NA	NA	NA
TR41103|c3_g1_i2	15.2468	49.5842	1.70137	0.0333206	0.812514	No	NA	NA	NA	NA	NA	NA	NA
TR41729|c0_g8_i2	15.2468	49.5842	1.70137	0.0333206	0.811763	No	PREDICTED: UTP--glucose-1-phosphate uridylyltransferase-like	Sesamum indicum	NA	NA	NA	NA	NA
TR42923|c2_g6_i1	15.2468	49.5842	1.70137	0.0333206	0.812891	No	NA	NA	NA	NA	NA	NA	NA
TR37678|c2_g3_i4	89.3027	290.159	1.70007	0.0273528	0.759462	No	NA	NA	NA	NA	NA	NA	NA
TR39227|c1_g3_i1	58.8091	190.991	1.69939	0.0362778	0.831501	No	PREDICTED: F-box protein At3g07870-like	Sesamum indicum	NA	NA	NA	NA	NA
TR35230|c2_g1_i1	455.226	1478.34	1.69933	0.0128491	0.57943	No	NA	NA	NA	NA	NA	NA	NA
TR2402|c1_g1_i3	43.5623	141.407	1.6987	0.0416989	0.870521	No	hypothetical protein MIMGU_mgv1a007994mg	Mimulus guttatus	NA	oxidation-reduction process[GO:0055114]	zinc ion binding[GO:0008270] ; oxidoreductase activity[GO:0016491]	NA	NA
TR28434|c0_g1_i2	1585.67	5145.73	1.69829	0.0262328	0.746465	No	PREDICTED: universal stress protein A-like protein	Sesamum indicum	NA	NA	NA	NA	NA
TR43661|c2_g2_i4	100.193	325.052	1.69788	0.0253531	0.736148	No	PREDICTED: uncharacterized protein LOC105156657	Sesamum indicum	NA	NA	NA	NA	NA
TR30332|c0_g1_i1	28.3155	91.8225	1.69726	0.0459146	0.898688	No	NA	NA	NA	NA	NA	NA	NA
TR44218|c2_g2_i1	28.3155	91.8225	1.69726	0.0459146	0.899022	No	PREDICTED: uncharacterized protein LOC105173250	Sesamum indicum	NA	NA	NA	NA	NA
TR7690|c1_g3_i1	41.3842	134.061	1.69574	0.0428369	0.876219	No	NA	NA	NA	NA	NA	NA	NA
TR40235|c0_g9_i5	161.181	521.552	1.69413	0.0177926	0.647652	No	NA	NA	NA	NA	NA	NA	NA
TR36836|c1_g2_i2	78.4121	253.43	1.69244	0.0306593	0.788118	No	hypothetical protein MIMGU_mgv1a008287mg	Mimulus guttatus	NA	NA	NA	integral component of membrane[GO:0016021]	NA
TR33791|c0_g10_i3	26.1374	84.4767	1.69244	0.0461282	0.896539	No	RNA-dependent RNA polymerase 1	Salvia miltiorrhiza	NA	transcription, RNA-templated[GO:0001172]	RNA-directed RNA polymerase activity[GO:0003968]	NA	NA
TR36284|c0_g7_i2	26.1374	84.4767	1.69244	0.0461282	0.896208	No	PREDICTED: uncharacterized protein LOC105175041	Sesamum indicum	NA	NA	NA	NA	NA
TR38854|c0_g2_i5	26.1374	84.4767	1.69244	0.0461282	0.895878	No	PREDICTED: uncharacterized protein LOC105179968	Sesamum indicum	NA	NA	NA	NA	NA
TR18645|c0_g1_i2	13.0687	42.2384	1.69244	0.0266786	0.753453	No	NA	NA	NA	NA	NA	NA	NA
TR33208|c1_g1_i1	13.0687	42.2384	1.69244	0.0266786	0.753049	No	NA	NA	NA	NA	NA	NA	NA
TR32974|c0_g3_i7	102.371	330.561	1.6911	0.0255549	0.739563	No	PREDICTED: uncharacterized protein LOC105160600	Sesamum indicum	NA	NA	NA	NA	NA
TR42204|c1_g4_i1	572.844	1845.63	1.6879	0.014161	0.595273	No	PREDICTED: uncharacterized protein LOC105155456	Sesamum indicum	NA	NA	NA	NA	NA
TR42208|c1_g11_i1	23.9593	77.1309	1.68673	0.0460401	0.896811	No	NA	NA	NA	NA	NA	NA	NA
TR43158|c0_g1_i2	23.9593	77.1309	1.68673	0.0460401	0.897143	No	PREDICTED: RNA-dependent RNA polymerase 2	Sesamum indicum	NA	NA	NA	NA	NA
TR32995|c0_g1_i10	932.233	3000.76	1.68656	0.0179923	0.648204	No	hypothetical protein MIMGU_mgv1a015340mg	Mimulus guttatus	NA	NA	NA	integral component of membrane[GO:0016021]	NA
TR30202|c0_g5_i10	58.8091	189.154	1.68545	0.0379096	0.846433	No	translation elongation factor 1, partial	Ziziphus jujuba	NA	translational elongation[GO:0006414]	translation elongation factor activity[GO:0003746] ; GTP binding[GO:0005525] ; GTPase activity[GO:0003924]	NA	NA
TR43971|c0_g2_i3	348.498	1120.23	1.68458	0.0136141	0.592127	No	PREDICTED: CSC1-like protein ERD4	Sesamum indicum	NA	NA	NA	NA	NA
TR32784|c0_g3_i3	115.44	370.963	1.68413	0.0238145	0.717173	No	PREDICTED: uncharacterized protein LOC105168308	Sesamum indicum	NA	NA	NA	NA	NA
TR32241|c0_g3_i4	56.631	181.809	1.68276	0.039053	0.860653	No	PREDICTED: far upstream element-binding protein 2 isoform X2	Sesamum indicum	NA	NA	NA	NA	NA
TR37734|c0_g3_i3	56.631	181.809	1.68276	0.039053	0.860293	No	PREDICTED: protein trichome birefringence-like 38	Sesamum indicum	NA	NA	NA	NA	NA
TR35019|c0_g2_i6	119.796	383.818	1.67984	0.0234812	0.71161	No	PREDICTED: uncharacterized protein LOC103928328 isoform X2	Pyrus x bretschneideri	NA	NA	NA	NA	NA
TR38992|c0_g1_i2	108.906	348.926	1.67984	0.0253615	0.735985	No	PREDICTED: NAC domain-containing protein 72-like	Sesamum indicum	NA	NA	NA	NA	NA
TR39326|c0_g2_i6	32.6717	104.678	1.67984	0.047638	0.903219	No	big map kinase/bmk, putative	Ricinus communis	NA	MAPK cascade[GO:0000165]	MAP kinase activity[GO:0004707] ; ATP binding[GO:0005524]	intracellular[GO:0005622]	map04150:mTOR signaling pathway(protein kinase[ec:2.7.11.24])
TR22821|c0_g1_i4	32.6717	104.678	1.67984	0.047638	0.902894	No	NA	NA	NA	NA	NA	NA	NA
TR28118|c0_g3_i1	21.7812	69.7851	1.67984	0.0455906	0.896008	No	PREDICTED: hydroxymethylglutaryl-CoA synthase-like	Nicotiana tomentosiformis	NA	NA	NA	NA	NA
TR35081|c0_g6_i1	21.7812	69.7851	1.67984	0.0455906	0.896342	No	NA	NA	NA	NA	NA	NA	NA
TR42182|c0_g3_i8	21.7812	69.7851	1.67984	0.0455906	0.895006	No	PREDICTED: vacuolar protein 8	Sesamum indicum	NA	NA	NA	NA	NA
TR43187|c2_g1_i1	21.7812	69.7851	1.67984	0.0455906	0.89534	No	PREDICTED: oligopeptide transporter 5-like	Sesamum indicum	NA	NA	NA	NA	NA
TR44738|c7_g5_i2	21.7812	69.7851	1.67984	0.0455906	0.895674	No	PREDICTED: probable LRR receptor-like serine/threonine-protein kinase At3g47570	Erythranthe guttatus	NA	NA	NA	NA	NA
TR37173|c0_g1_i2	10.8906	34.8926	1.67984	0.0183379	0.655274	No	hypothetical protein MIMGU_mgv1a009226mg	Mimulus guttatus	NA	NA	NA	NA	NA
TR35699|c0_g6_i6	52.2748	167.117	1.67667	0.0414239	0.870992	No	hypothetical protein PRUPE_ppa016117mg, partial	Prunus persica	NA	myo-inositol hexakisphosphate biosynthetic process[GO:0010264] ; photosystem II assembly[GO:0010207]	NA	chloroplast[GO:0009507]	NA
TR2876|c0_g2_i1	52.2748	167.117	1.67667	0.0414239	0.870645	No	NA	NA	NA	NA	NA	NA	NA
TR40844|c1_g2_i2	82.7684	264.449	1.67584	0.0312691	0.794489	No	hypothetical protein MIMGU_mgv1a001688mg	Mimulus guttatus	NA	carbohydrate metabolic process[GO:0005975]	hydrolase activity, hydrolyzing O-glycosyl compounds[GO:0004553]	NA	NA
TR30976|c0_g2_i1	41.3842	132.224	1.67584	0.0453482	0.893912	No	NA	NA	NA	NA	NA	NA	NA
TR36528|c0_g1_i2	579.379	1849.31	1.6744	0.0149323	0.6064	No	cytochrome P450 CYP92A73	Salvia miltiorrhiza	NA	oxidation-reduction process[GO:0055114]	heme binding[GO:0020037] ; oxidoreductase activity, acting on paired donors, with incorporation or reduction of molecular oxygen[GO:0016705] ; monooxygenase activity[GO:0004497] ; iron ion binding[GO:0005506]	NA	NA
TR7666|c0_g1_i2	60.9872	194.664	1.6744	0.0384199	0.853845	No	NA	NA	NA	NA	NA	NA	NA
TR41648|c2_g3_i10	30.4936	97.3319	1.6744	0.0486829	0.906389	No	PREDICTED: uncharacterized protein LOC105170752	Sesamum indicum	NA	NA	NA	NA	NA
TR8125|c1_g12_i1	30.4936	97.3319	1.6744	0.0486829	0.90671	No	NA	NA	NA	NA	NA	NA	NA
TR34800|c0_g1_i1	259.196	826.403	1.6728	0.0153276	0.611608	No	beta-1,3-glucanase	Olea europaea	NA	NA	NA	NA	NA
TR21385|c0_g1_i1	128.509	409.528	1.6721	0.0228462	0.707426	No	PREDICTED: chlorophyll a-b binding protein CP24 10A, chloroplastic	Sesamum indicum	NA	NA	NA	NA	NA
TR36781|c0_g1_i3	128.509	409.528	1.6721	0.0228462	0.707842	No	hypothetical protein M569_03169	Genlisea aurea	NA	cation transmembrane transport[GO:0098655]	cation transmembrane transporter activity[GO:0008324]	integral component of membrane[GO:0016021]	NA
TR43412|c0_g1_i2	823.328	2622.45	1.67138	0.0175947	0.644906	No	PREDICTED: phosphomethylpyrimidine synthase, chloroplastic	Nicotiana sylvestris	NA	NA	NA	NA	NA
TR27979|c0_g1_i1	529.282	1685.86	1.67138	0.0147	0.601602	No	PREDICTED: chlorophyll a-b binding protein CP24 10A, chloroplastic	Cucumis melo	NA	NA	NA	NA	NA
TR33439|c0_g13_i2	58.8091	187.318	1.67138	0.0396178	0.860499	No	NA	NA	NA	NA	NA	NA	NA
TR39189|c0_g5_i4	58.8091	187.318	1.67138	0.0396178	0.860144	No	PREDICTED: 3-ketoacyl-CoA synthase 6-like	Sesamum indicum	NA	NA	NA	NA	NA
TR7311|c0_g2_i3	39.2061	124.879	1.67138	0.0467262	0.897563	No	PREDICTED: uncharacterized protein LOC105158727	Sesamum indicum	NA	NA	NA	NA	NA
TR42169|c0_g1_i1	19.603	62.4393	1.67138	0.0444204	0.890285	No	PREDICTED: MLO-like protein 1 isoform X3	Sesamum indicum	NA	NA	NA	NA	NA
TR37217|c0_g3_i1	19.603	62.4393	1.67138	0.0444204	0.890624	No	NA	NA	NA	NA	NA	NA	NA
TR38338|c0_g4_i3	19.603	62.4393	1.67138	0.0444204	0.889946	No	hypothetical protein MIMGU_mgv1a009538mg	Mimulus guttatus	NA	NA	NA	NA	NA
TR40272|c1_g1_i1	19.603	62.4393	1.67138	0.0444204	0.891982	No	NA	NA	NA	NA	NA	NA	NA
TR41771|c0_g2_i1	19.603	62.4393	1.67138	0.0444204	0.891302	No	PREDICTED: protein tipD	Sesamum indicum	NA	NA	NA	NA	NA
TR42160|c1_g2_i1	19.603	62.4393	1.67138	0.0444204	0.890963	No	PREDICTED: probable 28S rRNA (cytosine(4447)-C(5))-methyltransferase	Populus euphratica	NA	NA	NA	NA	NA
TR43360|c0_g1_i4	19.603	62.4393	1.67138	0.0444204	0.891642	No	PREDICTED: pentatricopeptide repeat-containing protein At5g39980, chloroplastic	Malus domestica	NA	NA	NA	NA	NA
TR8264|c1_g1_i1	19.603	62.4393	1.67138	0.0444204	0.892322	No	PREDICTED: dipeptidyl peptidase 9	Sesamum indicum	NA	NA	NA	NA	NA
TR30573|c0_g1_i1	193.852	617.047	1.67042	0.0175845	0.644982	No	PREDICTED: uncharacterized protein LOC105177798	Sesamum indicum	NA	NA	NA	NA	NA
TR3456|c1_g1_i3	47.9185	152.425	1.66945	0.0438371	0.88635	No	NA	NA	NA	NA	NA	NA	NA
TR3682|c0_g1_i1	47.9185	152.425	1.66945	0.0438371	0.88601	No	NA	NA	NA	NA	NA	NA	NA
TR4775|c0_g1_i1	47.9185	152.425	1.66945	0.0438371	0.88567	No	NA	NA	NA	NA	NA	NA	NA
TR22805|c0_g1_i2	315.827	1004.54	1.66933	0.014699	0.60203	No	hypothetical protein MIMGU_mgv1a017510mg	Mimulus guttatus	NA	NA	NA	NA	NA
TR31369|c0_g4_i2	28.3155	89.9861	1.66811	0.0495009	0.911949	No	PREDICTED: putative late blight resistance protein homolog R1B-14	Sesamum indicum	NA	NA	NA	NA	NA
TR27277|c1_g1_i1	28.3155	89.9861	1.66811	0.0495009	0.912268	No	NA	NA	NA	NA	NA	NA	NA
TR39903|c0_g1_i2	28.3155	89.9861	1.66811	0.0495009	0.912588	No	NA	NA	NA	NA	NA	NA	NA
TR41447|c3_g1_i3	263.552	837.421	1.66787	0.0155411	0.613618	No	hypothetical protein MIMGU_mgv1a008790mg	Mimulus guttatus	NA	NA	zinc ion binding[GO:0008270]	NA	NA
TR34062|c0_g1_i2	263.552	837.421	1.66787	0.0155411	0.613158	No	PREDICTED: probable protein phosphatase 2C 34	Sesamum indicum	NA	NA	NA	NA	NA
TR32703|c1_g1_i11	206.921	657.449	1.6678	0.0171926	0.647283	No	PREDICTED: nudix hydrolase 2-like isoform X2	Erythranthe guttatus	NA	NA	NA	NA	NA
TR35411|c0_g1_i4	289.689	920.062	1.66722	0.0151342	0.609429	No	hypothetical protein MIMGU_mgv1a020989mg	Mimulus guttatus	NA	NA	transferase activity[GO:0016740]	NA	NA
TR40235|c0_g7_i1	400.773	1272.66	1.66699	0.0144479	0.598731	No	PREDICTED: uncharacterized protein LOC105159766	Sesamum indicum	NA	NA	NA	NA	NA
TR2973|c0_g4_i1	185.14	587.664	1.66638	0.0183069	0.655503	No	PREDICTED: BEL1-like homeodomain protein 1	Sesamum indicum	NA	NA	NA	NA	NA
TR30584|c1_g2_i1	701.353	2225.78	1.6661	0.0165569	0.63102	No	PREDICTED: calvin cycle protein CP12-1, chloroplastic-like	Sesamum indicum	NA	NA	NA	NA	NA
TR41360|c1_g4_i2	45.7404	145.08	1.6653	0.0451275	0.895933	No	PREDICTED: DNA excision repair protein ERCC-8	Sesamum indicum	NA	NA	NA	NA	NA
TR42927|c1_g3_i4	45.7404	145.08	1.6653	0.0451275	0.895595	No	PREDICTED: probable protein phosphatase 2C 52	Sesamum indicum	NA	NA	NA	NA	NA
TR31254|c1_g8_i1	206.921	655.613	1.66376	0.0174677	0.645642	No	NA	NA	NA	NA	NA	NA	NA
TR39665|c0_g1_i1	80.5903	255.267	1.66333	0.0332096	0.811685	No	PREDICTED: uncharacterized protein LOC105168293	Sesamum indicum	NA	NA	NA	NA	NA
TR38005|c0_g1_i3	1158.76	3669.23	1.6629	0.0224703	0.701146	No	PREDICTED: BTB/POZ domain-containing protein At2g30600	Sesamum indicum	NA	NA	NA	NA	NA
TR44604|c3_g5_i1	106.728	337.907	1.66269	0.0274284	0.75916	No	PREDICTED: subtilisin-like protease	Sesamum indicum	NA	NA	NA	NA	NA
TR3969|c0_g3_i3	87.1246	275.468	1.66073	0.0318277	0.796009	No	PREDICTED: U-box domain-containing protein 38-like	Sesamum indicum	NA	NA	NA	NA	NA
TR33681|c0_g1_i9	60.9872	192.827	1.66073	0.04011	0.862651	No	NA	NA	NA	NA	NA	NA	NA
TR42093|c0_g2_i3	52.2748	165.281	1.66073	0.0434481	0.88187	No	cytochrome P450 CYP71AU51	Salvia miltiorrhiza	NA	oxidation-reduction process[GO:0055114]	heme binding[GO:0020037] ; oxidoreductase activity, acting on paired donors, with incorporation or reduction of molecular oxygen[GO:0016705] ; monooxygenase activity[GO:0004497] ; iron ion binding[GO:0005506]	integral component of membrane[GO:0016021]	NA
TR27529|c3_g1_i9	52.2748	165.281	1.66073	0.0434481	0.88153	No	NA	NA	NA	NA	NA	NA	NA
TR19217|c0_g1_i3	34.8498	110.187	1.66073	0.0495958	0.913058	No	PREDICTED: 40S ribosomal protein S5-like	Solanum tuberosum	NA	translation[GO:0006412]	structural constituent of ribosome[GO:0003735] ; RNA binding[GO:0003723]	small ribosomal subunit[GO:0015935]	NA
TR41730|c0_g9_i1	34.8498	110.187	1.66073	0.0495958	0.912739	No	PREDICTED: uncharacterized protein LOC105166786 isoform X1	Sesamum indicum	NA	NA	NA	NA	NA
TR35438|c1_g3_i8	34.8498	110.187	1.66073	0.0495958	0.912102	No	NA	NA	NA	NA	NA	NA	NA
TR38411|c3_g2_i1	34.8498	110.187	1.66073	0.0495958	0.91242	No	NA	NA	NA	NA	NA	NA	NA
TR32735|c2_g1_i6	26.1374	82.6403	1.66073	0.0499643	0.914727	No	unnamed protein product	Coffea canephora	NA	response to stress[GO:0006950]	NA	NA	NA
TR35257|c1_g1_i8	26.1374	82.6403	1.66073	0.0499643	0.915045	No	hypothetical protein MIMGU_mgv1a011498mg	Mimulus guttatus	NA	NA	NA	NA	NA
TR42564|c0_g1_i5	26.1374	82.6403	1.66073	0.0499643	0.915364	No	NA	NA	NA	NA	NA	NA	NA
TR44609|c8_g9_i1	17.4249	55.0935	1.66073	0.0419902	0.873486	No	NA	NA	NA	NA	NA	NA	NA
TR25701|c4_g2_i1	17.4249	55.0935	1.66073	0.0419902	0.873831	No	NA	NA	NA	NA	NA	NA	NA
TR36163|c0_g2_i1	17.4249	55.0935	1.66073	0.0419902	0.874176	No	NA	NA	NA	NA	NA	NA	NA
TR32703|c1_g1_i4	196.03	618.884	1.65859	0.0183127	0.655265	No	hypothetical protein MIMGU_mgv1a011677mg	Mimulus guttatus	NA	NA	NA	NA	NA
TR7789|c0_g1_i14	58.8091	185.481	1.65716	0.0414062	0.870969	No	NA	NA	NA	NA	NA	NA	NA
TR36177|c0_g2_i10	50.0967	157.935	1.65654	0.0447732	0.893614	No	NA	NA	NA	NA	NA	NA	NA
TR43270|c0_g4_i1	91.4808	288.323	1.65614	0.0313407	0.79554	No	PREDICTED: primary amine oxidase-like	Sesamum indicum	NA	NA	NA	NA	NA
TR26139|c1_g2_i1	41.3842	130.388	1.65566	0.0480191	0.906528	No	NA	NA	NA	NA	NA	NA	NA
TR39009|c1_g3_i1	41.3842	130.388	1.65566	0.0480191	0.906203	No	unnamed protein product	Coffea canephora	NA	positive regulation of GTPase activity[GO:0043547]	GTPase activator activity[GO:0005096]	NA	NA
TR40900|c0_g9_i6	65.3435	205.682	1.6543	0.039263	0.862036	No	PREDICTED: protein NRT1/ PTR FAMILY 3.1-like	Sesamum indicum	NA	NA	NA	NA	NA
TR39311|c0_g5_i1	65.3435	205.682	1.6543	0.039263	0.861677	No	PREDICTED: leucine-rich repeat receptor-like serine/threonine/tyrosine-protein kinase SOBIR1	Sesamum indicum	NA	NA	NA	NA	NA
TR44593|c0_g2_i1	65.3435	205.682	1.6543	0.039263	0.862395	No	NA	NA	NA	NA	NA	NA	NA
TR36757|c1_g3_i4	32.6717	102.841	1.6543	0.0510051	0.913461	No	PREDICTED: uncharacterized protein LOC105164444	Sesamum indicum	NA	NA	NA	NA	NA
TR43209|c1_g7_i2	32.6717	102.841	1.6543	0.0510051	0.91315	No	PREDICTED: putative clathrin assembly protein At2g25430	Sesamum indicum	NA	NA	NA	NA	NA
TR30137|c0_g1_i2	193.852	609.701	1.65315	0.0188136	0.663719	No	hypothetical protein MIMGU_mgv1a016210mg	Mimulus guttatus	NA	photosynthesis[GO:0015979]	chlorophyll binding[GO:0016168]	photosystem I[GO:0009522]	NA
TR44593|c0_g1_i8	424.732	1335.1	1.65232	0.0152994	0.610943	No	PREDICTED: probable LRR receptor-like serine/threonine-protein kinase At1g06840	Erythranthe guttatus	NA	NA	NA	NA	NA
TR43187|c2_g1_i4	143.756	451.767	1.65196	0.0226342	0.704175	No	hypothetical protein MIMGU_mgv1a002615mg	Mimulus guttatus	NA	transmembrane transport[GO:0055085]	NA	integral component of membrane[GO:0016021]	NA
TR33085|c0_g2_i4	71.8778	225.883	1.65196	0.0372177	0.840966	No	PREDICTED: probable quinone oxidoreductase	Sesamum indicum	NA	NA	NA	NA	NA
TR34345|c3_g2_i1	47.9185	150.589	1.65196	0.0461197	0.896704	No	NA	NA	NA	NA	NA	NA	NA
TR38321|c0_g3_i1	47.9185	150.589	1.65196	0.0461197	0.897036	No	RNA-binding family protein	Theobroma cacao	NA	positive regulation of cell proliferation[GO:0008284] ; mRNA splicing, via spliceosome[GO:0000398] ; photoperiodism, flowering[GO:0048573]	nucleic acid binding[GO:0003676] ; nucleotide binding[GO:0000166]	nucleus[GO:0005634]	NA
TR35968|c1_g3_i1	23.9593	75.2945	1.65196	0.0502034	0.911815	No	PREDICTED: zinc finger CCCH domain-containing protein 14-like	Sesamum indicum	NA	NA	NA	NA	NA
TR42081|c1_g9_i1	23.9593	75.2945	1.65196	0.0502034	0.9115	No	NA	NA	NA	NA	NA	NA	NA
TR2691|c1_g2_i6	23.9593	75.2945	1.65196	0.0502034	0.912129	No	NA	NA	NA	NA	NA	NA	NA
TR40384|c0_g1_i1	78.4121	246.084	1.65	0.0353637	0.819464	No	PREDICTED: transmembrane protein 53	Sesamum indicum	NA	NA	NA	NA	NA
TR36969|c0_g1_i2	39.2061	123.042	1.65	0.0496037	0.91193	No	hypothetical protein POPTR_0015s08810g	Populus trichocarpa	NA	NA	NA	NA	NA
TR7878|c0_g2_i4	472.651	1482.02	1.64871	0.0156505	0.614253	No	PREDICTED: protein EARLY RESPONSIVE TO DEHYDRATION 15	Sesamum indicum	NA	NA	NA	NA	NA
TR33834|c0_g4_i2	69.6997	218.538	1.64866	0.0383797	0.853674	No	NA	NA	NA	NA	NA	NA	NA
TR34017|c4_g3_i7	213.455	668.468	1.64692	0.0183857	0.656092	No	PREDICTED: protein NLP7-like isoform X1	Erythranthe guttatus	NA	NA	NA	NA	NA
TR39610|c0_g6_i1	45.7404	143.243	1.64692	0.0475776	0.902723	No	NA	NA	NA	NA	NA	NA	NA
TR30005|c0_g1_i1	45.7404	143.243	1.64692	0.0475776	0.902398	No	PREDICTED: uncharacterized protein LOC105159948	Sesamum indicum	NA	NA	NA	NA	NA
TR41175|c2_g4_i1	30.4936	95.4954	1.64692	0.0523077	0.92329	No	hypothetical protein M569_01051, partial	Genlisea aurea	NA	NA	NA	NA	NA
TR32275|c2_g3_i3	15.2468	47.7477	1.64692	0.0375463	0.844767	No	PREDICTED: cytochrome b5-like	Sesamum indicum	NA	NA	NA	NA	NA
TR39198|c0_g3_i1	15.2468	47.7477	1.64692	0.0375463	0.845489	No	FAD/NAD(P)-binding oxidoreductase family protein	Theobroma cacao	NA	oxidation-reduction process[GO:0055114]	oxidoreductase activity[GO:0016491]	chloroplast[GO:0009507]	NA
TR29001|c0_g3_i1	15.2468	47.7477	1.64692	0.0375463	0.845128	No	NA	NA	NA	NA	NA	NA	NA
TR37818|c0_g1_i3	15.2468	47.7477	1.64692	0.0375463	0.844406	No	NA	NA	NA	NA	NA	NA	NA
TR34017|c4_g1_i1	15.2468	47.7477	1.64692	0.0375463	0.844046	No	hypothetical protein MIMGU_mgv1a007144mg	Mimulus guttatus	NA	NA	NA	NA	NA
TR35442|c0_g3_i1	15.2468	47.7477	1.64692	0.0375463	0.845851	No	NA	NA	NA	NA	NA	NA	NA
TR37463|c0_g4_i1	128.509	402.183	1.64598	0.0252113	0.736905	No	NA	NA	NA	NA	NA	NA	NA
TR39520|c1_g6_i1	337.608	1055.96	1.64513	0.0159663	0.620179	No	AChain A, Crystal Structure Of The Saposin-Like Domain Of Plant Aspartic Protease From Solanum Tuberosum	Solanum tuberosum	NA	proteolysis[GO:0006508] ; lipid metabolic process[GO:0006629]	aspartic-type endopeptidase activity[GO:0004190]	NA	NA
TR3816|c0_g2_i1	156.824	490.332	1.64461	0.0219212	0.696388	No	PREDICTED: heme-binding-like protein At3g10130, chloroplastic	Sesamum indicum	NA	NA	NA	NA	NA
TR32545|c0_g1_i5	89.3027	279.14	1.64421	0.0331393	0.811098	No	hypothetical protein MIMGU_mgv1a008849mg	Mimulus guttatus	NA	transmembrane transport[GO:0055085]	transmembrane transporter activity[GO:0022857]	integral component of membrane[GO:0016021]	NA
TR36515|c0_g2_i6	185.14	578.482	1.64366	0.0199959	0.679927	No	PREDICTED: uncharacterized protein LOC105971463	Erythranthe guttatus	NA	NA	NA	NA	NA
TR2294|c0_g5_i1	37.028	115.696	1.64366	0.0512579	0.91612	No	PREDICTED: NADH dehydrogenase [ubiquinone] 1 alpha subcomplex subunit 2-like	Solanum lycopersicum	NA	NA	NA	NA	NA
TR37859|c0_g1_i3	58.8091	183.645	1.64281	0.0432787	0.880469	No	PREDICTED: probable protein phosphatase 2C 49	Sesamum indicum	NA	NA	NA	NA	NA
TR37463|c0_g1_i1	80.5903	251.594	1.64242	0.0356185	0.822835	No	hypothetical protein MIMGU_mgv1a011479mg	Mimulus guttatus	NA	NA	NA	NA	NA
TR35227|c1_g4_i1	124.153	387.491	1.64205	0.0262832	0.747092	No	PREDICTED: dehydration-responsive protein RD22	Sesamum indicum	NA	NA	NA	NA	NA
TR34963|c2_g4_i3	124.153	387.491	1.64205	0.0262832	0.746689	No	NA	NA	NA	NA	NA	NA	NA
TR44593|c0_g1_i12	174.249	543.589	1.64136	0.0208528	0.684323	No	Leucine-rich repeat protein kinase family protein isoform 1	Theobroma cacao	NA	protein phosphorylation[GO:0006468]	ATP binding[GO:0005524] ; protein serine/threonine kinase activity[GO:0004674]	integral component of membrane[GO:0016021]	NA
TR26845|c0_g2_i3	43.5623	135.897	1.64136	0.049159	0.909786	No	PREDICTED: acyl-[acyl-carrier-protein] desaturase, chloroplastic	Erythranthe guttatus	NA	NA	NA	NA	NA
TR3699|c1_g1_i1	21.7812	67.9487	1.64136	0.0500806	0.912416	No	hypothetical protein M569_12652, partial	Genlisea aurea	NA	NA	NA	NA	NA
TR40169|c0_g2_i1	21.7812	67.9487	1.64136	0.0500806	0.912101	No	NA	NA	NA	NA	NA	NA	NA
TR3872|c0_g1_i2	143.756	448.094	1.64018	0.023672	0.714926	No	PREDICTED: autophagy-related protein 8C-like	Sesamum indicum	NA	NA	NA	NA	NA
TR3659|c1_g3_i1	71.8778	224.047	1.64018	0.0386727	0.856932	No	PREDICTED: arogenate dehydratase/prephenate dehydratase 6, chloroplastic	Vigna radiata var. radiata	NA	NA	NA	NA	NA
TR40187|c1_g2_i1	71.8778	224.047	1.64018	0.0386727	0.856572	No	hypothetical protein MIMGU_mgv1a006804mg	Mimulus guttatus	NA	NA	NA	NA	NA
TR37194|c1_g1_i4	50.0967	156.098	1.63967	0.0470295	0.898147	No	Senescence-associated protein, putative	Solanum demissum	NA	NA	NA	integral component of membrane[GO:0016021]	NA
TR35400|c0_g1_i2	50.0967	156.098	1.63967	0.0470295	0.897822	No	hypothetical protein B456_003G123300	Gossypium raimondii	NA	negative regulation of transcription, DNA-templated[GO:0045892] ; oxidation-reduction process[GO:0055114]	oxidoreductase activity[GO:0016491] ; FMN binding[GO:0010181]	NA	NA
TR39581|c1_g4_i3	50.0967	156.098	1.63967	0.0470295	0.898473	No	NA	NA	NA	NA	NA	NA	NA
TR42786|c0_g3_i4	50.0967	156.098	1.63967	0.0470295	0.897496	No	PREDICTED: molybdenum cofactor sulfurase-like	Sesamum indicum	NA	NA	NA	NA	NA
TR31330|c3_g8_i2	228.702	712.543	1.63951	0.018353	0.65537	No	PREDICTED: oxygen-evolving enhancer protein 2-1, chloroplastic-like	Sesamum indicum	NA	NA	NA	NA	NA
TR43449|c1_g3_i3	163.359	508.697	1.63876	0.0218542	0.697624	No	PREDICTED: EIN3-binding F-box protein 1-like	Sesamum indicum	NA	NA	NA	NA	NA
TR33834|c0_g4_i1	84.9465	264.449	1.63836	0.0348901	0.816392	No	NA	NA	NA	NA	NA	NA	NA
TR3764|c1_g1_i2	56.631	176.299	1.63836	0.0447389	0.893268	No	PREDICTED: ZF-HD homeobox protein At4g24660	Vitis vinifera	NA	NA	NA	NA	NA
TR39104|c0_g2_i1	28.3155	88.1496	1.63836	0.0533967	0.932822	No	hypothetical protein MIMGU_mgv1a023481mg	Mimulus guttatus	NA	metabolic process[GO:0008152]	NA	membrane[GO:0016020]	NA
TR40421|c1_g1_i7	28.3155	88.1496	1.63836	0.0533967	0.933442	No	PREDICTED: G-box-binding factor 1-like isoform X1	Sesamum indicum	NA	NA	NA	NA	NA
TR43738|c0_g10_i1	28.3155	88.1496	1.63836	0.0533967	0.933132	No	SecA homolog	Pisum sativum=peas, Peptide Chloroplast Partial, 276 aa	NA	protein import[GO:0017038] ; protein targeting[GO:0006605]	ATP binding[GO:0005524]	intracellular[GO:0005622] ; membrane[GO:0016020]	NA
TR32848|c1_g2_i1	104.55	325.052	1.63648	0.0305958	0.786871	No	PREDICTED: lipoxygenase homology domain-containing protein 1-like	Sesamum indicum	NA	NA	NA	NA	NA
TR44215|c1_g4_i3	69.6997	216.701	1.63648	0.0399165	0.861304	No	PREDICTED: probable galactinol--sucrose galactosyltransferase 2	Sesamum indicum	NA	NA	NA	NA	NA
TR41470|c0_g1_i1	34.8498	108.351	1.63648	0.0529501	0.926556	No	NA	NA	NA	NA	NA	NA	NA
TR36739|c0_g2_i2	41.3842	128.552	1.63519	0.0508605	0.916481	No	PREDICTED: stem-specific protein TSJT1-like	Sesamum indicum	NA	NA	NA	NA	NA
TR34271|c2_g5_i6	47.9185	148.752	1.63426	0.0485321	0.905823	No	PREDICTED: probable xyloglucan endotransglucosylase/hydrolase protein 23-like	Vitis vinifera	NA	cell wall organization[GO:0071555] ; xyloglucan metabolic process[GO:0010411] ; cell wall biogenesis[GO:0042546]	xyloglucan:xyloglucosyl transferase activity[GO:0016762] ; hydrolase activity, hydrolyzing O-glycosyl compounds[GO:0004553]	cell wall[GO:0005618] ; apoplast[GO:0048046]	NA
TR32440|c0_g2_i2	47.9185	148.752	1.63426	0.0485321	0.905182	No	PREDICTED: uncharacterized protein LOC105175548	Sesamum indicum	NA	NA	NA	NA	NA
TR34017|c4_g3_i8	47.9185	148.752	1.63426	0.0485321	0.905502	No	PREDICTED: protein NLP7-like isoform X1	Erythranthe guttatus	NA	NA	NA	NA	NA
TR33478|c0_g1_i2	54.4529	168.953	1.63355	0.0462526	0.896971	No	hypothetical protein MIMGU_mgv1a005645mg	Mimulus guttatus	NA	metabolic process[GO:0008152]	transferase activity, transferring hexosyl groups[GO:0016758]	NA	NA
TR7880|c1_g2_i3	54.4529	168.953	1.63355	0.0462526	0.897301	No	PREDICTED: uncharacterized protein LOC105174256	Sesamum indicum	NA	NA	NA	NA	NA
TR33180|c1_g1_i4	795.012	2466.35	1.63333	0.0196482	0.674196	No	NA	NA	NA	NA	NA	NA	NA
TR38005|c0_g1_i1	1343.9	4168.74	1.63319	0.0274128	0.759525	No	PREDICTED: BTB/POZ domain-containing protein At2g30600	Sesamum indicum	NA	NA	NA	NA	NA
TR33614|c0_g2_i2	121.974	378.309	1.63299	0.0275561	0.759501	No	PREDICTED: LOW QUALITY PROTEIN: probable WRKY transcription factor 33	Sesamum indicum	NA	NA	NA	NA	NA
TR43167|c0_g12_i1	74.0559	229.556	1.63216	0.0389354	0.859139	No	NA	NA	NA	NA	NA	NA	NA
TR29230|c0_g3_i2	74.0559	229.556	1.63216	0.0389354	0.859499	No	NA	NA	NA	NA	NA	NA	NA
TR35166|c0_g5_i3	890.849	2760.18	1.63151	0.0209781	0.686297	No	PREDICTED: thioredoxin-like protein CDSP32, chloroplastic	Nicotiana sylvestris	NA	NA	NA	NA	NA
TR34801|c1_g2_i1	132.865	411.365	1.63046	0.0260414	0.745854	No	PREDICTED: nuclear transcription factor Y subunit B-3-like	Sesamum indicum	NA	NA	NA	NA	NA
TR36122|c0_g1_i4	65.3435	202.01	1.62831	0.0426312	0.873367	No	PREDICTED: uncharacterized protein LOC105175084	Sesamum indicum	NA	NA	NA	NA	NA
TR44164|c4_g10_i3	45.7404	141.407	1.62831	0.0501723	0.91188	No	hypothetical protein MIMGU_mgv1a022389mg	Mimulus guttatus	NA	NA	NA	integral component of membrane[GO:0016021]	NA
TR33601|c0_g4_i3	32.6717	101.005	1.62831	0.0546316	0.943752	No	NA	NA	NA	NA	NA	NA	NA
TR31731|c1_g3_i2	26.1374	80.8038	1.62831	0.0541744	0.939861	No	NA	NA	NA	NA	NA	NA	NA
TR35759|c3_g1_i1	26.1374	80.8038	1.62831	0.0541744	0.940791	No	PREDICTED: PRA1 family protein F3-like	Solanum tuberosum	NA	vesicle-mediated transport[GO:0016192]	NA	integral component of membrane[GO:0016021]	NA
TR43962|c1_g2_i1	26.1374	80.8038	1.62831	0.0541744	0.940481	No	NA	NA	NA	NA	NA	NA	NA
TR36518|c2_g1_i1	26.1374	80.8038	1.62831	0.0541744	0.940171	No	gag-pol polyprotein	Eustoma exaltatum subsp. russellianum	NA	NA	NA	NA	NA
TR21204|c0_g1_i1	19.603	60.6029	1.62831	0.049199	0.909888	No	PREDICTED: CASP-like protein 4A3	Sesamum indicum	NA	NA	NA	NA	NA
TR36238|c1_g6_i1	19.603	60.6029	1.62831	0.049199	0.910207	No	NA	NA	NA	NA	NA	NA	NA
TR39408|c2_g1_i1	13.0687	40.4019	1.62831	0.0305547	0.786583	No	PREDICTED: uncharacterized protein LOC105159715	Sesamum indicum	NA	NA	NA	NA	NA
TR39965|c0_g1_i1	13.0687	40.4019	1.62831	0.0305547	0.786199	No	PREDICTED: calcium-dependent protein kinase 1-like	Sesamum indicum	NA	NA	NA	NA	NA
TR33261|c1_g6_i2	13.0687	40.4019	1.62831	0.0305547	0.786968	No	PREDICTED: uncharacterized protein LOC105169149	Sesamum indicum	NA	NA	NA	NA	NA
TR39766|c1_g1_i1	13.0687	40.4019	1.62831	0.0305547	0.787738	No	NA	NA	NA	NA	NA	NA	NA
TR34633|c0_g9_i1	13.0687	40.4019	1.62831	0.0305547	0.787353	No	NA	NA	NA	NA	NA	NA	NA
TR38613|c0_g2_i8	161.181	497.678	1.62654	0.0230819	0.70889	No	NA	NA	NA	NA	NA	NA	NA
TR44593|c0_g1_i13	409.486	1263.48	1.62552	0.0169404	0.640079	No	PREDICTED: probable LRR receptor-like serine/threonine-protein kinase At1g06840	Erythranthe guttatus	NA	NA	NA	NA	NA
TR39520|c1_g5_i2	540.173	1665.66	1.6246	0.0175471	0.645407	No	hypothetical protein, partial	Zea mays	NA	proteolysis[GO:0006508]	aspartic-type endopeptidase activity[GO:0004190]	NA	NA
TR34449|c0_g1_i1	145.934	449.93	1.62439	0.0248603	0.729075	No	hypothetical protein MIMGU_mgv1a001106mg	Mimulus guttatus	NA	NA	NA	NA	NA
TR34393|c1_g2_i4	106.728	328.725	1.62295	0.0316168	0.793372	No	hypothetical protein MIMGU_mgv1a023077mg	Mimulus guttatus	NA	NA	NA	NA	NA
TR31154|c0_g2_i3	156.824	482.986	1.62283	0.0238153	0.716785	No	PREDICTED: uncharacterized protein LOC105972393	Erythranthe guttatus	NA	NA	NA	NA	NA
TR35779|c0_g1_i1	50.0967	154.262	1.62259	0.0494048	0.911773	No	hypothetical protein MIMGU_mgv1a011828mg	Mimulus guttatus	NA	oxidation-reduction process[GO:0055114]	oxidoreductase activity[GO:0016491]	NA	NA
TR3856|c0_g1_i2	50.0967	154.262	1.62259	0.0494048	0.911454	No	hypothetical protein MIMGU_mgv1a010259mg	Mimulus guttatus	NA	NA	NA	NA	NA
TR34017|c4_g3_i4	217.812	670.304	1.62174	0.0200909	0.680081	No	PREDICTED: protein NLP7-like isoform X1	Erythranthe guttatus	NA	NA	NA	NA	NA
TR40791|c0_g3_i7	43.5623	134.061	1.62174	0.0519566	0.91925	No	PREDICTED: beta-D-glucosyl crocetin beta-1,6-glucosyltransferase-like	Sesamum indicum	NA	NA	NA	NA	NA
TR35367|c1_g5_i7	37.028	113.86	1.62057	0.0545798	0.943786	No	PREDICTED: probable WRKY transcription factor 70	Sesamum indicum	NA	NA	NA	NA	NA
TR33608|c0_g1_i7	37.028	113.86	1.62057	0.0545798	0.943476	No	hypothetical protein MIMGU_mgv1a015013mg	Mimulus guttatus	NA	NA	NA	NA	NA
TR33093|c0_g3_i1	67.5216	207.519	1.61982	0.0429298	0.877778	No	NA	NA	NA	NA	NA	NA	NA
TR30672|c1_g1_i8	30.4936	93.659	1.61891	0.0562286	0.946506	No	NA	NA	NA	NA	NA	NA	NA
TR38068|c0_g1_i1	30.4936	93.659	1.61891	0.0562286	0.946809	No	NA	NA	NA	NA	NA	NA	NA
TR38734|c0_g3_i2	980.152	3008.11	1.61778	0.0231678	0.70946	No	hypothetical protein MIMGU_mgv1a006915mg	Mimulus guttatus	NA	metabolic process[GO:0008152]	catalytic activity[GO:0003824]	NA	NA
TR41075|c0_g1_i2	47.9185	146.916	1.61634	0.0510819	0.914216	No	NA	NA	NA	NA	NA	NA	NA
TR36610|c0_g1_i1	23.9593	73.458	1.61634	0.0548058	0.943359	No	hypothetical protein MIMGU_mgv1a011147mg	Mimulus guttatus	NA	NA	NA	NA	NA
TR41328|c0_g1_i1	23.9593	73.458	1.61634	0.0548058	0.943667	No	NA	NA	NA	NA	NA	NA	NA
TR30073|c0_g2_i1	65.3435	200.173	1.61513	0.0444266	0.889732	No	PREDICTED: uncharacterized protein LOC100855103	Vitis vinifera	NA	NA	NA	NA	NA
TR31816|c0_g2_i3	65.3435	200.173	1.61513	0.0444266	0.889393	No	PREDICTED: RING-H2 finger protein ATL73-like	Sesamum indicum	NA	NA	NA	NA	NA
TR41150|c1_g1_i15	82.7684	253.43	1.61444	0.0384132	0.854056	No	hypothetical protein JCGZ_19514	Jatropha curcas	NA	NA	NA	NA	NA
TR35016|c0_g5_i2	58.8091	179.972	1.61366	0.0472925	0.900557	No	PREDICTED: uncharacterized protein LOC105174459 isoform X2	Sesamum indicum	NA	NA	NA	NA	NA
TR28449|c1_g1_i2	374.636	1145.94	1.61298	0.0178484	0.648788	No	PREDICTED: geraniol 8-hydroxylase-like	Sesamum indicum	NA	NA	NA	NA	NA
TR23348|c0_g1_i2	261.374	798.856	1.61182	0.0194155	0.669264	No	PREDICTED: putative lipid-binding protein At4g00165-like	Solanum lycopersicum	NA	NA	NA	NA	NA
TR42093|c0_g1_i3	52.2748	159.771	1.61182	0.0501627	0.91202	No	hypothetical protein MIMGU_mgv1a025513mg	Mimulus guttatus	NA	oxidation-reduction process[GO:0055114]	heme binding[GO:0020037] ; oxidoreductase activity, acting on paired donors, with incorporation or reduction of molecular oxygen[GO:0016705] ; monooxygenase activity[GO:0004497] ; iron ion binding[GO:0005506]	NA	NA
TR34407|c0_g1_i2	34.8498	106.514	1.61182	0.0565509	0.945885	No	PREDICTED: cinnamoyl-CoA reductase 1-like	Sesamum indicum	NA	NA	NA	NA	NA
TR41911|c1_g8_i4	34.8498	106.514	1.61182	0.0565509	0.946185	No	PREDICTED: myosin-14	Sesamum indicum	NA	NA	NA	NA	NA
TR36941|c3_g2_i1	17.4249	53.2571	1.61182	0.0469483	0.898878	No	EMB1873 protein, partial	Erythranthe guttata	NA	putrescine biosynthetic process[GO:0009446]	protein-arginine deiminase activity[GO:0004668] ; agmatine deiminase activity[GO:0047632]	NA	map00330:Arginine and proline metabolism(deiminase[ec:3.5.3.12])
TR42445|c0_g5_i1	17.4249	53.2571	1.61182	0.0469483	0.89986	No	NA	NA	NA	NA	NA	NA	NA
TR32864|c0_g3_i2	17.4249	53.2571	1.61182	0.0469483	0.899205	No	PREDICTED: auxin transporter-like protein 2	Sesamum indicum	NA	NA	NA	NA	NA
TR3629|c2_g14_i3	17.4249	53.2571	1.61182	0.0469483	0.898225	No	NA	NA	NA	NA	NA	NA	NA
TR37932|c0_g9_i1	17.4249	53.2571	1.61182	0.0469483	0.899532	No	hypothetical protein B456_007G172000	Gossypium raimondii	NA	proteolysis[GO:0006508] ; protein initiator methionine removal[GO:0070084]	metal ion binding[GO:0046872] ; metalloaminopeptidase activity[GO:0070006]	cytoplasm[GO:0005737]	NA
TR7951|c0_g5_i1	17.4249	53.2571	1.61182	0.0469483	0.898552	No	hypothetical protein EUGRSUZ_K00370	Eucalyptus grandis	NA	NA	NA	NA	NA
TR39174|c0_g2_i1	17.4249	53.2571	1.61182	0.0469483	0.897899	No	NA	NA	NA	NA	NA	NA	NA
TR35411|c0_g1_i1	370.28	1131.25	1.61124	0.0179872	0.649353	No	hypothetical protein MIMGU_mgv1a020989mg	Mimulus guttatus	NA	NA	transferase activity[GO:0016740]	NA	NA
TR37100|c0_g1_i5	328.895	1004.54	1.61083	0.0183235	0.655204	No	PREDICTED: purple acid phosphatase 2-like	Sesamum indicum	NA	NA	NA	NA	NA
TR35089|c0_g1_i2	108.906	332.397	1.60983	0.0326322	0.807313	No	hypothetical protein M569_11621	Genlisea aurea	NA	NA	NA	NA	NA
TR32413|c0_g1_i6	74.0559	225.883	1.60889	0.0419784	0.874276	No	hypothetical protein EUGRSUZ_G01572	Eucalyptus grandis	NA	NA	NA	NA	NA
TR44593|c0_g2_i5	74.0559	225.883	1.60889	0.0419784	0.874622	No	PREDICTED: probable LRR receptor-like serine/threonine-protein kinase At1g06840	Sesamum indicum	NA	NA	NA	NA	NA
TR41355|c0_g2_i2	56.631	172.626	1.60799	0.0490024	0.907207	No	unnamed protein product	Coffea canephora	NA	carbohydrate metabolic process[GO:0005975]	NA	NA	NA
TR23925|c0_g1_i1	28.3155	86.3132	1.60799	0.0576322	0.951283	No	PREDICTED: E3 ubiquitin-protein ligase RHA2A-like	Sesamum indicum	NA	NA	NA	NA	NA
TR33105|c0_g4_i2	28.3155	86.3132	1.60799	0.0576322	0.95188	No	PREDICTED: chaperone protein dnaJ 20, chloroplastic-like	Sesamum indicum	NA	NA	NA	NA	NA
TR41855|c0_g1_i1	28.3155	86.3132	1.60799	0.0576322	0.951581	No	NA	NA	NA	NA	NA	NA	NA
TR3741|c3_g4_i1	135.043	411.365	1.607	0.02807	0.766049	No	NA	NA	NA	NA	NA	NA	NA
TR38388|c0_g1_i1	117.618	358.108	1.60628	0.0312205	0.793637	No	hypothetical protein MIMGU_mgv1a004721mg	Mimulus guttatus	NA	NA	NA	integral component of membrane[GO:0016021]	NA
TR43412|c0_g1_i1	368.101	1120.23	1.60563	0.0183885	0.655749	No	PREDICTED: phosphomethylpyrimidine synthase, chloroplastic isoform X1	Sesamum indicum	NA	NA	NA	NA	NA
TR40327|c0_g1_i1	150.29	457.276	1.60532	0.0261681	0.746641	No	PREDICTED: long-chain-alcohol oxidase FAO4A-like	Erythranthe guttatus	NA	NA	NA	NA	NA
TR15975|c1_g3_i1	60.9872	185.481	1.6047	0.0476821	0.902754	No	NA	NA	NA	NA	NA	NA	NA
TR36380|c0_g1_i1	71.8778	218.538	1.60426	0.0434045	0.881326	No	PREDICTED: probable 2-carboxy-D-arabinitol-1-phosphatase	Sesamum indicum	NA	NA	NA	NA	NA
TR7858|c0_g3_i2	585.913	1781.36	1.60422	0.0193046	0.665874	No	NA	NA	NA	NA	NA	NA	NA
TR35955|c0_g2_i4	104.55	317.706	1.60351	0.0343452	0.811938	No	NA	NA	NA	NA	NA	NA	NA
TR28635|c0_g4_i1	191.674	582.155	1.60275	0.0229721	0.70924	No	PREDICTED: protein EARLY RESPONSIVE TO DEHYDRATION 15-like	Erythranthe guttatus	NA	NA	NA	NA	NA
TR40685|c0_g2_i1	206.921	628.066	1.60184	0.0222065	0.698708	No	PREDICTED: zinc finger BED domain-containing protein RICESLEEPER 2-like	Cicer arietinum	NA	NA	NA	NA	NA
TR41461|c0_g3_i1	76.234	231.393	1.60184	0.0421668	0.87474	No	NA	NA	NA	NA	NA	NA	NA
TR26413|c0_g2_i1	21.7812	66.1122	1.60184	0.0550876	0.940524	No	NA	NA	NA	NA	NA	NA	NA
TR30786|c0_g1_i8	21.7812	66.1122	1.60184	0.0550876	0.940829	No	1-deoxy-D-xylulose-5-phosphate synthase, partial	Satureja khuzistanica	Lamiaceae	metabolic process[GO:0008152]	catalytic activity[GO:0003824]	NA	NA
TR35765|c0_g3_i4	21.7812	66.1122	1.60184	0.0550876	0.94022	No	PREDICTED: probable protein phosphatase 2C 60	Sesamum indicum	NA	NA	NA	NA	NA
TR42392|c1_g1_i8	21.7812	66.1122	1.60184	0.0550876	0.939611	No	NA	NA	NA	NA	NA	NA	NA
TR43094|c0_g2_i4	21.7812	66.1122	1.60184	0.0550876	0.94144	No	PREDICTED: protein EARLY FLOWERING 3-like	Sesamum indicum	NA	NA	NA	NA	NA
TR35962|c0_g2_i3	21.7812	66.1122	1.60184	0.0550876	0.939915	No	hypothetical protein JCGZ_26812	Jatropha curcas	NA	metabolic process[GO:0008152]	amino acid binding[GO:0016597]	NA	NA
TR41131|c0_g6_i1	21.7812	66.1122	1.60184	0.0550876	0.941134	No	hypothetical protein MIMGU_mgv1a004293mg	Mimulus guttatus	NA	pectin biosynthetic process[GO:0045489] ; cell wall organization[GO:0071555]	polygalacturonate 4-alpha-galacturonosyltransferase activity[GO:0047262]	Golgi membrane[GO:0000139] ; integral component of membrane[GO:0016021]	map00500:Starch and sucrose metabolism(4-alpha-galacturonosyltransferase[ec:2.4.1.43]) ; map00520:Amino sugar and nucleotide sugar metabolism(4-alpha-galacturonosyltransferase[ec:2.4.1.43])
TR23708|c0_g1_i1	10.8906	33.0561	1.60184	0.0216335	0.695215	No	NA	NA	NA	NA	NA	NA	NA
TR41389|c0_g5_i1	10.8906	33.0561	1.60184	0.0216335	0.694368	No	PREDICTED: uncharacterized protein LOC105156347	Sesamum indicum	NA	NA	NA	NA	NA
TR31380|c1_g1_i5	10.8906	33.0561	1.60184	0.0216335	0.694791	No	NA	NA	NA	NA	NA	NA	NA
TR35833|c0_g2_i1	263.552	798.856	1.59985	0.0202776	0.68115	No	PREDICTED: putative receptor-like protein kinase At1g72540	Sesamum indicum	NA	NA	NA	NA	NA
TR2313|c0_g1_i1	117.618	356.271	1.59886	0.0320619	0.799967	No	NA	NA	NA	NA	NA	NA	NA
TR4087|c0_g2_i1	58.8091	178.136	1.59886	0.0494425	0.91183	No	NA	NA	NA	NA	NA	NA	NA
TR40141|c0_g1_i4	106.728	323.215	1.59856	0.03444	0.813084	No	PREDICTED: O-acyltransferase WSD1-like	Sesamum indicum	NA	NA	NA	NA	NA
TR34635|c0_g3_i6	37.028	112.023	1.59711	0.058135	0.953902	No	hypothetical protein MIMGU_mgv1a014197mg	Mimulus guttatus	NA	NA	NA	NA	NA
TR26896|c0_g1_i1	63.1653	190.991	1.5963	0.0480003	0.906498	No	hypothetical protein MIMGU_mgv1a002892mg	Mimulus guttatus	NA	NA	NA	integral component of membrane[GO:0016021]	NA
TR2461|c1_g2_i1	63.1653	190.991	1.5963	0.0480003	0.907148	No	BnaC03g19930D	Brassica napus	NA	NA	NA	NA	NA
TR39192|c0_g5_i1	63.1653	190.991	1.5963	0.0480003	0.906823	No	hypothetical protein B456_007G107100	Gossypium raimondii	NA	NA	transferase activity, transferring glycosyl groups[GO:0016757]	NA	NA
TR32431|c1_g1_i4	52.2748	157.935	1.59514	0.0526344	0.923794	No	NA	NA	NA	NA	NA	NA	NA
TR29868|c0_g2_i1	26.1374	78.9674	1.59514	0.0587994	0.959722	No	PREDICTED: uncharacterized protein LOC104236755	Nicotiana sylvestris	NA	NA	NA	NA	NA
TR18156|c0_g1_i3	26.1374	78.9674	1.59514	0.0587994	0.959127	No	hypothetical protein B456_005G011400	Gossypium raimondii	NA	NA	NA	NA	NA
TR40248|c0_g1_i6	26.1374	78.9674	1.59514	0.0587994	0.959424	No	PREDICTED: serine hydroxymethyltransferase 3, chloroplastic	Erythranthe guttatus	NA	NA	NA	NA	NA
TR33224|c0_g2_i1	296.224	894.351	1.59415	0.020009	0.679933	No	PREDICTED: remorin-like	Sesamum indicum	NA	NA	NA	NA	NA
TR39727|c3_g2_i10	368.101	1111.05	1.59375	0.0192411	0.666303	No	PREDICTED: probable leucine-rich repeat receptor-like protein kinase At5g63930	Sesamum indicum	NA	NA	NA	NA	NA
TR39179|c0_g4_i1	98.0152	295.668	1.5929	0.0371842	0.84057	No	hypothetical protein MIMGU_mgv1a005225mg	Mimulus guttatus	NA	proteolysis[GO:0006508]	aspartic-type endopeptidase activity[GO:0004190]	integral component of membrane[GO:0016021]	NA
TR41005|c1_g1_i2	498.788	1502.22	1.59059	0.0195694	0.672805	No	PREDICTED: beta-galactosidase-like	Sesamum indicum	NA	NA	NA	NA	NA
TR3373|c0_g1_i2	91.4808	275.468	1.59034	0.0391079	0.861143	No	hypothetical protein MIMGU_mgv1a011313mg	Mimulus guttatus	NA	NA	NA	NA	NA
TR42527|c0_g3_i1	45.7404	137.734	1.59034	0.0558327	0.94346	No	hypothetical protein MIMGU_mgv1a000652mg	Mimulus guttatus	NA	metabolic process[GO:0008152]	glycogen (starch) synthase activity[GO:0004373]	NA	map00500:Starch and sucrose metabolism(synthase[ec:2.4.1.11])
TR37652|c2_g6_i1	30.4936	91.8225	1.59034	0.0604725	0.965781	No	NA	NA	NA	NA	NA	NA	NA
TR18527|c0_g4_i1	15.2468	45.9113	1.59034	0.0424496	0.875779	No	PREDICTED: serine/arginine repetitive matrix protein 1 isoform X1	Sesamum indicum	NA	NA	NA	NA	NA
TR2604|c0_g2_i1	15.2468	45.9113	1.59034	0.0424496	0.874751	No	PREDICTED: uncharacterized protein LOC105161463	Sesamum indicum	NA	NA	NA	NA	NA
TR28385|c0_g1_i4	15.2468	45.9113	1.59034	0.0424496	0.875437	No	PREDICTED: protein phosphatase methylesterase 1	Sesamum indicum	NA	NA	NA	NA	NA
TR44204|c1_g2_i1	15.2468	45.9113	1.59034	0.0424496	0.87681	No	hypothetical protein MIMGU_mgv11b020544mg	Mimulus guttatus	NA	NA	zinc ion binding[GO:0008270]	NA	NA
TR1100|c0_g1_i1	15.2468	45.9113	1.59034	0.0424496	0.876466	No	NA	NA	NA	NA	NA	NA	NA
TR28125|c0_g1_i3	15.2468	45.9113	1.59034	0.0424496	0.876123	No	NA	NA	NA	NA	NA	NA	NA
TR28623|c0_g1_i4	15.2468	45.9113	1.59034	0.0424496	0.875094	No	hypothetical protein OsI_30038	Oryza sativa Indica Group	NA	metabolic process[GO:0008152]	catalytic activity[GO:0003824]	NA	NA
TR36918|c0_g1_i3	187.318	563.79	1.58967	0.0244214	0.723454	No	PREDICTED: uncharacterized protein LOC105170638 isoform X2	Sesamum indicum	NA	NA	NA	NA	NA
TR35230|c2_g1_i7	581.557	1748.3	1.58796	0.0204146	0.680543	No	PREDICTED: aldose 1-epimerase-like	Sesamum indicum	NA	NA	NA	NA	NA
TR2976|c0_g3_i1	185.14	556.444	1.58762	0.0247585	0.728521	No	PREDICTED: two-component response regulator-like APRR9	Sesamum indicum	NA	NA	NA	NA	NA
TR4087|c0_g1_i3	209.099	628.066	1.58673	0.0234072	0.712649	No	PREDICTED: cucumber peeling cupredoxin	Sesamum indicum	NA	NA	NA	NA	NA
TR40187|c1_g2_i4	69.6997	209.355	1.58673	0.0467341	0.89706	No	PREDICTED: uncharacterized WD repeat-containing protein C2A9.03-like	Sesamum indicum	NA	NA	NA	NA	NA
TR38589|c0_g4_i2	69.6997	209.355	1.58673	0.0467341	0.897387	No	AMT1;5	Malus hupehensis var. mengshanensis	NA	ammonium transmembrane transport[GO:0072488]	ammonium transmembrane transporter activity[GO:0008519]	integral component of membrane[GO:0016021]	NA
TR32684|c0_g2_i2	34.8498	104.678	1.58673	0.0604177	0.965199	No	NA	NA	NA	NA	NA	NA	NA
TR33834|c0_g2_i3	34.8498	104.678	1.58673	0.0604177	0.965492	No	NA	NA	NA	NA	NA	NA	NA
TR40831|c0_g3_i6	34.8498	104.678	1.58673	0.0604177	0.965785	No	PREDICTED: zinc finger CCCH domain-containing protein 29	Sesamum indicum	NA	NA	NA	NA	NA
TR7858|c0_g3_i6	585.913	1759.32	1.58626	0.0205813	0.682643	No	PREDICTED: LOW QUALITY PROTEIN: transcription factor UNE10-like	Sesamum indicum	NA	NA	NA	NA	NA
TR34671|c0_g1_i5	74.0559	222.21	1.58524	0.0452704	0.894387	No	hypothetical protein MIMGU_mgv1a024146mg	Mimulus guttatus	NA	NA	NA	NA	NA
TR33879|c2_g1_i3	58.8091	176.299	1.58391	0.0516942	0.91769	No	PREDICTED: structure-specific endonuclease subunit SLX1-like	Sesamum indicum	NA	NA	NA	NA	NA
TR39384|c1_g2_i1	58.8091	176.299	1.58391	0.0516942	0.917999	No	PREDICTED: probable mannitol dehydrogenase	Sesamum indicum	NA	NA	NA	NA	NA
TR37425|c1_g6_i1	19.603	58.7664	1.58391	0.0545861	0.943276	No	PREDICTED: uncharacterized protein LOC105162498	Sesamum indicum	NA	NA	NA	NA	NA
TR38922|c0_g1_i6	365.923	1096.36	1.58311	0.0200487	0.679966	No	PREDICTED: lysM domain-containing GPI-anchored protein 2	Sesamum indicum	NA	NA	NA	NA	NA
TR30976|c0_g2_i2	63.1653	189.154	1.58236	0.0500798	0.912717	No	PREDICTED: uncharacterized protein LOC105170876	Sesamum indicum	NA	NA	NA	NA	NA
TR11775|c0_g3_i1	87.1246	260.776	1.58166	0.0414378	0.87059	No	hypothetical protein MIMGU_mgv1a023921mg, partial	Mimulus guttatus	NA	NA	NA	NA	NA
TR7593|c0_g1_i4	43.5623	130.388	1.58166	0.0580809	0.953313	No	hypothetical protein MIMGU_mgv1a022199mg	Mimulus guttatus	NA	phosphorelay signal transduction system[GO:0000160]	signal transducer activity[GO:0004871]	intracellular[GO:0005622]	NA
TR42640|c0_g2_i6	43.5623	130.388	1.58166	0.0580809	0.95361	No	NA	NA	NA	NA	NA	NA	NA
TR26416|c1_g1_i1	2130.2	6374.32	1.58128	0.046062	0.896574	No	NA	NA	NA	NA	NA	NA	NA
TR31831|c1_g2_i2	230.88	690.505	1.58051	0.0229525	0.709051	No	PREDICTED: chlorophyll a-b binding protein 6, chloroplastic	Sesamum indicum	NA	NA	NA	NA	NA
TR25167|c1_g1_i1	139.399	416.874	1.58039	0.0302532	0.783031	No	hypothetical protein MIMGU_mgv1a010047mg	Mimulus guttatus	NA	carbohydrate phosphorylation[GO:0046835] ; D-ribose metabolic process[GO:0006014]	ribokinase activity[GO:0004747]	NA	map00030:Pentose phosphate pathway(deoxyribokinase[ec:2.7.1.15])
TR34142|c0_g3_i1	167.715	501.351	1.57981	0.0268735	0.756117	No	pathogenesis-related protein 10	Salvia miltiorrhiza	NA	response to biotic stimulus[GO:0009607] ; defense response[GO:0006952]	NA	NA	NA
TR42670|c0_g2_i1	23.9593	71.6216	1.57981	0.0599002	0.960427	No	PREDICTED: acetyl-coenzyme A synthetase, chloroplastic/glyoxysomal-like	Nelumbo nucifera	NA	NA	NA	NA	NA
TR43167|c0_g1_i4	23.9593	71.6216	1.57981	0.0599002	0.961891	No	PREDICTED: pheophytinase, chloroplastic	Sesamum indicum	NA	NA	NA	NA	NA
TR31281|c0_g2_i9	23.9593	71.6216	1.57981	0.0599002	0.960719	No	NA	NA	NA	NA	NA	NA	NA
TR36546|c1_g5_i2	23.9593	71.6216	1.57981	0.0599002	0.961012	No	NA	NA	NA	NA	NA	NA	NA
TR37194|c1_g4_i1	23.9593	71.6216	1.57981	0.0599002	0.961598	No	PREDICTED: tetraspanin-3-like	Sesamum indicum	NA	NA	NA	NA	NA
TR8167|c0_g2_i10	23.9593	71.6216	1.57981	0.0599002	0.961305	No	PREDICTED: LOW QUALITY PROTEIN: protein SENSITIVE TO PROTON RHIZOTOXICITY 1	Sesamum indicum	NA	NA	NA	NA	NA
TR31277|c1_g1_i1	100.193	299.341	1.57901	0.0384272	0.853287	No	PREDICTED: probable serine/threonine-protein kinase Cx32, chloroplastic isoform X2	Sesamum indicum	NA	NA	NA	NA	NA
TR32690|c3_g3_i8	100.193	299.341	1.57901	0.0384272	0.853647	No	hypothetical protein PHAVU_002G240900g	Phaseolus vulgaris	NA	NA	NA	NA	NA
TR40777|c4_g6_i4	76.234	227.72	1.57875	0.0454013	0.894626	No	PREDICTED: uncharacterized protein LOC104214185, partial	Nicotiana sylvestris	NA	NA	NA	NA	NA
TR34832|c0_g4_i2	185.14	552.771	1.57807	0.0256623	0.74104	No	PREDICTED: sphinganine C(4)-monooxygenase 1-like	Sesamum indicum	NA	NA	NA	NA	NA
TR40403|c0_g2_i2	988.864	2951.18	1.57745	0.0264707	0.749589	No	PREDICTED: glycosylphosphatidylinositol anchor attachment 1 protein	Sesamum indicum	NA	NA	NA	NA	NA
TR37899|c0_g6_i3	84.9465	253.43	1.57696	0.0427302	0.874716	No	PREDICTED: phytochrome A-associated F-box protein	Erythranthe guttatus	NA	NA	NA	NA	NA
TR31143|c0_g2_i4	56.631	168.953	1.57696	0.0536897	0.934221	No	hypothetical protein MIMGU_mgv1a000411mg	Mimulus guttatus	NA	NA	NA	NA	NA
TR36985|c0_g1_i1	56.631	168.953	1.57696	0.0536897	0.93453	No	PREDICTED: chaperone protein dnaJ 20, chloroplastic-like	Sesamum indicum	NA	NA	NA	NA	NA
TR30853|c0_g4_i4	28.3155	84.4767	1.57696	0.0622407	0.975678	No	PREDICTED: uncharacterized protein LOC105160689	Sesamum indicum	NA	NA	NA	NA	NA
TR31936|c2_g2_i9	239.593	714.379	1.57611	0.0229962	0.709568	No	PREDICTED: putative disease resistance RPP13-like protein 1	Sesamum indicum	NA	NA	NA	NA	NA
TR7972|c2_g6_i1	32.6717	97.3319	1.57487	0.0627524	0.98253	No	NA	NA	NA	NA	NA	NA	NA
TR44738|c6_g3_i15	139.399	415.038	1.57402	0.0309666	0.788705	No	hypothetical protein MIMGU_mgv1a000542mg	Mimulus guttatus	NA	NA	kinase activity[GO:0016301]	NA	NA
TR41205|c0_g1_i2	185.14	550.935	1.57327	0.0261272	0.746282	No	PREDICTED: G-type lectin S-receptor-like serine/threonine-protein kinase At1g34300	Sesamum indicum	NA	NA	NA	NA	NA
TR32864|c0_g2_i1	37.028	110.187	1.57327	0.0619411	0.975045	No	NA	NA	NA	NA	NA	NA	NA
TR7906|c0_g2_i1	37.028	110.187	1.57327	0.0619411	0.975336	No	NA	NA	NA	NA	NA	NA	NA
TR29230|c0_g3_i5	496.61	1476.51	1.572	0.0209348	0.686159	No	NA	NA	NA	NA	NA	NA	NA
TR38524|c2_g4_i5	41.3842	123.042	1.572	0.0605281	0.965498	No	hypothetical protein MIMGU_mgv1a004862mg	Mimulus guttatus	NA	protein phosphorylation[GO:0006468]	protein kinase activity[GO:0004672] ; ATP binding[GO:0005524]	NA	NA
TR37292|c1_g1_i9	41.3842	123.042	1.572	0.0605281	0.965205	No	PREDICTED: glutathione S-transferase TCHQD	Sesamum indicum	NA	NA	NA	NA	NA
TR42215|c0_g4_i1	41.3842	123.042	1.572	0.0605281	0.964913	No	NA	NA	NA	NA	NA	NA	NA
TR43270|c0_g1_i4	137.221	407.692	1.57098	0.0316651	0.794207	No	PREDICTED: primary amine oxidase-like	Sesamum indicum	NA	NA	NA	NA	NA
TR42863|c2_g2_i1	45.7404	135.897	1.57098	0.0589182	0.958691	No	PREDICTED: serine/threonine-protein kinase STN8, chloroplastic	Sesamum indicum	NA	NA	NA	NA	NA
TR37746|c0_g1_i1	104.55	310.36	1.56976	0.0385672	0.855675	No	PREDICTED: probable linoleate 9S-lipoxygenase 5 isoform X2	Sesamum indicum	NA	NA	NA	NA	NA
TR2876|c0_g1_i1	71.8778	213.028	1.56743	0.0487423	0.906855	No	NA	NA	NA	NA	NA	NA	NA
TR29230|c0_g3_i7	80.5903	238.739	1.56675	0.0456002	0.894862	No	NA	NA	NA	NA	NA	NA	NA
TR31831|c1_g3_i1	890.849	2638.98	1.56673	0.0259185	0.745578	No	chlorophyll a/b-binding protein type I	Malus domestica	NA	NA	NA	NA	NA
TR35055|c0_g4_i1	4966.1	14706.3	1.56625	0.099316	1.06215	No	PREDICTED: thiamine thiazole synthase 2, chloroplastic-like	Sesamum indicum	NA	NA	NA	NA	NA
TR3146|c1_g1_i1	98.0152	290.159	1.56577	0.0407231	0.871567	No	PREDICTED: uncharacterized protein LOC105169660	Sesamum indicum	NA	NA	NA	NA	NA
TR37597|c0_g1_i5	98.0152	290.159	1.56577	0.0407231	0.871213	No	PREDICTED: probable inactive purple acid phosphatase 29 isoform X1	Sesamum indicum	NA	NA	NA	NA	NA
TR43721|c1_g4_i3	111.084	328.725	1.56523	0.0375965	0.844094	No	hypothetical protein MIMGU_mgv1a002979mg	Mimulus guttatus	NA	NA	NA	NA	NA
TR30146|c2_g4_i4	65.3435	192.827	1.56119	0.0524314	0.924854	No	PREDICTED: malate dehydrogenase, mitochondrial	Nicotiana sylvestris	NA	NA	NA	NA	NA
TR33096|c0_g1_i1	60.9872	179.972	1.56119	0.0543263	0.941876	No	hypothetical protein MIMGU_mgv1a009408mg	Mimulus guttatus	NA	metabolic process[GO:0008152]	coenzyme binding[GO:0050662] ; catalytic activity[GO:0003824]	NA	NA
TR3944|c2_g4_i4	60.9872	179.972	1.56119	0.0543263	0.941566	No	hypothetical protein MIMGU_mgv1a001880mg	Mimulus guttatus	NA	intracellular transport[GO:0046907]	NA	NA	NA
TR27171|c0_g4_i4	52.2748	154.262	1.56119	0.0579662	0.954404	No	PREDICTED: U6 snRNA-associated Sm-like protein LSm7	Sesamum indicum	NA	NA	NA	NA	NA
TR26832|c2_g1_i2	47.9185	141.407	1.56119	0.0596422	0.960384	No	PREDICTED: transcription factor IBH1-like	Sesamum indicum	NA	NA	NA	NA	NA
TR7503|c0_g1_i3	39.2061	115.696	1.56119	0.0631754	0.981278	No	PREDICTED: ras-related protein RABE1a-like	Solanum lycopersicum	NA	vesicle docking involved in exocytosis[GO:0006904] ; protein secretion[GO:0009306] ; small GTPase mediated signal transduction[GO:0007264]	GTP binding[GO:0005525]	intracellular[GO:0005622]	NA
TR2439|c0_g1_i1	34.8498	102.841	1.56119	0.064572	0.984962	No	PREDICTED: probable 6-phosphogluconolactonase 2-like	Solanum tuberosum	NA	carbohydrate metabolic process[GO:0005975] ; pentose-phosphate shunt[GO:0006098]	6-phosphogluconolactonase activity[GO:0017057]	NA	map00030:Pentose phosphate pathway(phosphogluconolactonase[ec:3.1.1.31]) ; map01130:Biosynthesis of antibiotics(phosphogluconolactonase[ec:3.1.1.31])
TR26244|c0_g1_i1	34.8498	102.841	1.56119	0.064572	0.985533	No	PREDICTED: uncharacterized protein LOC105169591	Sesamum indicum	NA	NA	NA	NA	NA
TR40437|c0_g7_i3	34.8498	102.841	1.56119	0.064572	0.985247	No	PREDICTED: pyrroline-5-carboxylate reductase	Sesamum indicum	NA	NA	NA	NA	NA
TR35498|c0_g4_i8	34.8498	102.841	1.56119	0.064572	0.985818	No	PREDICTED: uncharacterized protein LOC105159582 isoform X1	Sesamum indicum	NA	NA	NA	NA	NA
TR32971|c0_g3_i15	34.8498	102.841	1.56119	0.064572	0.984677	No	unnamed protein product	Vitis vinifera	NA	defense response[GO:0006952] ; response to biotic stimulus[GO:0009607]	calmodulin binding[GO:0005516]	integral component of membrane[GO:0016021] ; plasma membrane[GO:0005886]	NA
TR804|c0_g2_i1	30.4936	89.9861	1.56119	0.0650689	0.982863	No	NA	NA	NA	NA	NA	NA	NA
TR28072|c0_g1_i1	26.1374	77.1309	1.56119	0.0638853	0.985908	No	PREDICTED: uncharacterized protein LOC104440686	Eucalyptus grandis	NA	NA	NA	integral component of membrane[GO:0016021]	NA
TR39097|c0_g4_i2	26.1374	77.1309	1.56119	0.0638853	0.986486	No	PREDICTED: delta(8)-fatty-acid desaturase	Sesamum indicum	NA	NA	NA	NA	NA
TR40791|c0_g5_i1	26.1374	77.1309	1.56119	0.0638853	0.986197	No	PREDICTED: beta-D-glucosyl crocetin beta-1,6-glucosyltransferase-like	Sesamum indicum	NA	NA	NA	NA	NA
TR24068|c0_g2_i1	21.7812	64.2758	1.56119	0.0606807	0.962975	No	unnamed protein product	Coffea canephora	NA	actin filament bundle assembly[GO:0051017]	actin filament binding[GO:0051015]	NA	NA
TR33608|c0_g1_i1	21.7812	64.2758	1.56119	0.0606807	0.963265	No	PREDICTED: uncharacterized protein LOC105157814	Sesamum indicum	NA	NA	NA	NA	NA
TR7818|c0_g1_i5	21.7812	64.2758	1.56119	0.0606807	0.962685	No	PREDICTED: uncharacterized protein LOC105966263	Erythranthe guttatus	NA	NA	NA	NA	NA
TR8183|c0_g4_i11	21.7812	64.2758	1.56119	0.0606807	0.963846	No	PREDICTED: sorting nexin 2B-like	Sesamum indicum	NA	NA	NA	NA	NA
TR20361|c0_g1_i2	21.7812	64.2758	1.56119	0.0606807	0.963556	No	NA	NA	NA	NA	NA	NA	NA
TR42221|c2_g1_i1	17.4249	51.4206	1.56119	0.0526193	0.924145	No	PREDICTED: BEL1-like homeodomain protein 1	Sesamum indicum	NA	NA	NA	NA	NA
TR29772|c0_g5_i2	17.4249	51.4206	1.56119	0.0526193	0.924453	No	NA	NA	NA	NA	NA	NA	NA
TR37777|c0_g7_i1	17.4249	51.4206	1.56119	0.0526193	0.924762	No	NA	NA	NA	NA	NA	NA	NA
TR39585|c1_g4_i1	17.4249	51.4206	1.56119	0.0526193	0.925071	No	NA	NA	NA	NA	NA	NA	NA
TR40011|c0_g5_i1	17.4249	51.4206	1.56119	0.0526193	0.923837	No	NA	NA	NA	NA	NA	NA	NA
TR42831|c0_g2_i3	17.4249	51.4206	1.56119	0.0526193	0.925379	No	NA	NA	NA	NA	NA	NA	NA
TR33403|c0_g4_i1	13.0687	38.5655	1.56119	0.0352567	0.818065	No	PREDICTED: uncharacterized protein LOC105161197	Sesamum indicum	NA	NA	NA	NA	NA
TR33593|c0_g1_i1	13.0687	38.5655	1.56119	0.0352567	0.818425	No	PREDICTED: protein MEI2-like 2	Sesamum indicum	NA	NA	NA	NA	NA
TR35739|c0_g1_i7	13.0687	38.5655	1.56119	0.0352567	0.818786	No	NA	NA	NA	NA	NA	NA	NA
TR43609|c1_g2_i1	13.0687	38.5655	1.56119	0.0352567	0.819147	No	PREDICTED: uncharacterized protein LOC105176172 isoform X1	Sesamum indicum	NA	NA	NA	NA	NA
TR38704|c1_g4_i4	594.625	1750.14	1.55741	0.0228859	0.707824	No	NA	NA	NA	NA	NA	NA	NA
TR40685|c0_g2_i6	102.371	301.178	1.5568	0.0408432	0.871657	No	NA	NA	NA	NA	NA	NA	NA
TR36212|c1_g3_i4	93.659	275.468	1.55639	0.0431258	0.879735	No	NA	NA	NA	NA	NA	NA	NA
TR30771|c1_g1_i2	1365.68	4016.32	1.55626	0.0345997	0.816122	No	PREDICTED: pleiotropic drug resistance protein 2-like, partial	Erythranthe guttatus	NA	NA	NA	NA	NA
TR28624|c2_g5_i1	84.9465	249.757	1.5559	0.0457388	0.896913	No	NA	NA	NA	NA	NA	NA	NA
TR26837|c0_g1_i3	161.181	473.804	1.55561	0.0300819	0.7809	No	S-adenosyl-L-homocysteine hydrolase	Ligularia fischeri	NA	one-carbon metabolic process[GO:0006730]	adenosylhomocysteinase activity[GO:0004013]	NA	map00270:Cysteine and methionine metabolism(S-adenosylhomocysteine synthase[ec:3.3.1.1])
TR36063|c0_g3_i7	614.229	1805.23	1.55534	0.0232631	0.711551	No	PREDICTED: uncharacterized protein LOC105948969	Erythranthe guttatus	NA	NA	NA	NA	NA
TR30406|c5_g2_i2	76.234	224.047	1.55529	0.0488955	0.90778	No	NA	NA	NA	NA	NA	NA	NA
TR35962|c0_g2_i1	76.234	224.047	1.55529	0.0488955	0.90746	No	hypothetical protein MIMGU_mgv1a018428mg	Mimulus guttatus	NA	transmembrane transport[GO:0055085]	transmembrane transporter activity[GO:0022857]	integral component of membrane[GO:0016021]	NA
TR32315|c2_g1_i1	67.5216	198.337	1.55453	0.0525559	0.924883	No	NA	NA	NA	NA	NA	NA	NA
TR33761|c1_g5_i1	572.844	1682.19	1.55412	0.022931	0.708803	No	hypothetical protein LR48_Vigan05g055400	Vigna angularis	NA	photosynthesis[GO:0015979]	chlorophyll binding[GO:0016168]	integral component of membrane[GO:0016021] ; photosystem I[GO:0009522]	NA
TR3481|c1_g1_i3	252.661	741.926	1.55407	0.0245067	0.72435	No	PREDICTED: zinc finger A20 and AN1 domain-containing stress-associated protein 8-like	Sesamum indicum	NA	NA	NA	NA	NA
TR32165|c1_g1_i1	63.1653	185.481	1.55407	0.054524	0.943751	No	PREDICTED: uncharacterized protein LOC105161253	Sesamum indicum	NA	NA	NA	NA	NA
TR39534|c4_g1_i3	520.57	1527.93	1.55341	0.0225495	0.702367	No	PREDICTED: pleiotropic drug resistance protein 2-like	Sesamum indicum	NA	NA	NA	NA	NA
TR33176|c0_g2_i6	172.071	505.024	1.55335	0.0292191	0.775706	No	PREDICTED: glutathione transferase GST 23-like	Sesamum indicum	NA	NA	NA	NA	NA
TR34195|c0_g4_i1	104.55	306.687	1.55258	0.0408739	0.87196	No	NA	NA	NA	NA	NA	NA	NA
TR33109|c1_g2_i6	50.0967	146.916	1.55221	0.0602765	0.964406	No	NA	NA	NA	NA	NA	NA	NA
TR34659|c0_g1_i2	95.8371	280.977	1.5518	0.0432108	0.880787	No	PREDICTED: UPF0400 protein C337.03 isoform X3	Sesamum indicum	NA	NA	NA	NA	NA
TR38613|c0_g3_i1	91.4808	268.122	1.55135	0.0444346	0.889216	No	NA	NA	NA	NA	NA	NA	NA
TR28434|c1_g1_i1	45.7404	134.061	1.55135	0.0621884	0.976603	No	NA	NA	NA	NA	NA	NA	NA
TR7895|c0_g1_i7	124.153	363.617	1.55031	0.0366288	0.834101	No	PREDICTED: probable carboxylesterase 15 isoform X1	Sesamum indicum	NA	NA	NA	NA	NA
TR35300|c0_g1_i3	82.7684	242.411	1.55031	0.0472932	0.900246	No	PREDICTED: 1-aminocyclopropane-1-carboxylate oxidase homolog 1-like isoform X1	Sesamum indicum	NA	NA	NA	NA	NA
TR40406|c0_g4_i3	82.7684	242.411	1.55031	0.0472932	0.899921	No	unnamed protein product	Coffea canephora	NA	NA	NA	NA	NA
TR35103|c3_g1_i4	161.181	471.968	1.55001	0.0307066	0.78818	No	PREDICTED: epsin-2-like	Solanum tuberosum	NA	NA	NA	NA	NA
TR42599|c0_g1_i3	111.084	325.052	1.54902	0.0397497	0.860524	No	PREDICTED: pentatricopeptide repeat-containing protein At4g18520-like isoform X4	Sesamum indicum	NA	NA	NA	NA	NA
TR48082|c0_g1_i1	37.028	108.351	1.54902	0.0660173	0.99009	No	PREDICTED: uncharacterized protein LOC105176694	Sesamum indicum	NA	NA	NA	NA	NA
TR40791|c0_g3_i16	37.028	108.351	1.54902	0.0660173	0.989808	No	PREDICTED: beta-D-glucosyl crocetin beta-1,6-glucosyltransferase-like	Sesamum indicum	NA	NA	NA	NA	NA
TR34142|c0_g9_i1	326.717	954.954	1.54739	0.0233675	0.712264	No	pathogenesis-related protein 10	Salvia miltiorrhiza	NA	response to biotic stimulus[GO:0009607] ; defense response[GO:0006952]	NA	NA	NA
TR29144|c0_g1_i1	65.3435	190.991	1.54739	0.0546573	0.943886	No	hypothetical protein MIMGU_mgv1a004020mg	Mimulus guttatus	NA	NA	NA	integral component of membrane[GO:0016021]	NA
TR39106|c1_g4_i14	32.6717	95.4954	1.54739	0.0672969	0.985157	No	PREDICTED: protein phosphatase methylesterase 1-like isoform X4	Phoenix dactylifera	NA	NA	NA	NA	NA
TR38053|c3_g10_i9	32.6717	95.4954	1.54739	0.0672969	0.985431	No	PREDICTED: reticulon-like protein B17	Sesamum indicum	NA	NA	NA	NA	NA
TR38400|c1_g3_i7	32.6717	95.4954	1.54739	0.0672969	0.985979	No	PREDICTED: uncharacterized protein LOC105163000 isoform X3	Sesamum indicum	NA	NA	NA	NA	NA
TR7860|c0_g4_i3	32.6717	95.4954	1.54739	0.0672969	0.985705	No	cytochrome P450 CYP706C35	Salvia miltiorrhiza	NA	oxidation-reduction process[GO:0055114]	heme binding[GO:0020037] ; oxidoreductase activity, acting on paired donors, with incorporation or reduction of molecular oxygen[GO:0016705] ; monooxygenase activity[GO:0004497] ; iron ion binding[GO:0005506]	integral component of membrane[GO:0016021]	NA
TR37717|c0_g1_i1	126.331	369.126	1.54691	0.0366163	0.834178	No	PREDICTED: pleiotropic drug resistance protein 2-like	Sesamum indicum	NA	NA	NA	NA	NA
TR42612|c2_g2_i7	60.9872	178.136	1.5464	0.0567487	0.947389	No	PREDICTED: calcium-dependent protein kinase 26-like	Malus domestica	NA	NA	NA	NA	NA
TR33834|c0_g2_i2	56.631	165.281	1.54525	0.0588445	0.958973	No	NA	NA	NA	NA	NA	NA	NA
TR40056|c0_g3_i1	28.3155	82.6403	1.54525	0.0672603	0.986541	No	hypothetical protein POPTR_0015s06580g	Populus trichocarpa	NA	NA	NA	integral component of membrane[GO:0016021]	NA
TR28694|c0_g1_i2	28.3155	82.6403	1.54525	0.0672603	0.986816	No	hypothetical protein MIMGU_mgv1a0125942mg, partial	Mimulus guttatus	NA	NA	NA	membrane[GO:0016020]	NA
TR34889|c2_g1_i1	28.3155	82.6403	1.54525	0.0672603	0.986267	No	NA	NA	NA	NA	NA	NA	NA
TR39792|c0_g2_i2	28.3155	82.6403	1.54525	0.0672603	0.987091	No	PREDICTED: DNA topoisomerase 6 subunit B isoform X2	Sesamum indicum	NA	NA	NA	NA	NA
TR47765|c0_g1_i1	28.3155	82.6403	1.54525	0.0672603	0.985992	No	NA	NA	NA	NA	NA	NA	NA
TR41604|c1_g4_i1	866.89	2528.79	1.54453	0.0274921	0.760124	No	hypothetical protein MIMGU_mgv1a001789mg	Mimulus guttatus	NA	proteolysis[GO:0006508]	serine-type endopeptidase activity[GO:0004252]	NA	NA
TR37112|c0_g1_i1	132.865	387.491	1.5442	0.0356765	0.823092	No	PREDICTED: LOW QUALITY PROTEIN: benzyl alcohol O-benzoyltransferase-like	Sesamum indicum	NA	NA	NA	NA	NA
TR37844|c0_g8_i2	76.234	222.21	1.54342	0.0507464	0.915051	No	unknown	Medicago truncatula	NA	proteolysis[GO:0006508]	serine-type carboxypeptidase activity[GO:0004185]	NA	NA
TR39210|c1_g1_i5	200.387	583.991	1.54316	0.028115	0.76688	No	NA	NA	NA	NA	NA	NA	NA
TR32762|c0_g4_i1	320.183	932.917	1.54285	0.0238706	0.717629	No	hypothetical protein B456_009G262000	Gossypium raimondii	NA	photosynthesis, light harvesting[GO:0009765] ; protein-chromophore linkage[GO:0018298]	chlorophyll binding[GO:0016168]	photosystem II[GO:0009523] ; integral component of membrane[GO:0016021] ; chloroplast[GO:0009507]	NA
TR35250|c1_g6_i1	215.633	628.066	1.54234	0.0272814	0.759079	No	hypothetical protein MIMGU_mgv1a013599mg	Mimulus guttatus	NA	NA	NA	NA	NA
TR42237|c0_g1_i1	71.8778	209.355	1.54234	0.0526764	0.923915	No	PREDICTED: G-type lectin S-receptor-like serine/threonine-protein kinase At4g27290 isoform X1	Sesamum indicum	NA	NA	NA	NA	NA
TR34113|c0_g2_i5	47.9185	139.57	1.54234	0.0628305	0.982293	No	NA	NA	NA	NA	NA	NA	NA
TR34509|c0_g1_i5	47.9185	139.57	1.54234	0.0628305	0.982001	No	cytochrome P450 71AU53-like protein	Salvia pomifera	Lamiaceae	NA	NA	NA	NA
TR34817|c0_g1_i1	23.9593	69.7851	1.54234	0.0655464	0.987809	No	NA	NA	NA	NA	NA	NA	NA
TR7493|c0_g3_i3	23.9593	69.7851	1.54234	0.0655464	0.987527	No	PREDICTED: synaptotagmin-5	Sesamum indicum	NA	NA	NA	NA	NA
TR38330|c0_g1_i2	385.526	1122.07	1.54126	0.0233419	0.711893	No	PREDICTED: sulfate transporter 4.1, chloroplastic	Sesamum indicum	NA	NA	NA	NA	NA
TR34379|c0_g4_i2	1261.13	3667.39	1.54004	0.0343737	0.811883	No	PREDICTED: proline-rich protein 4	Sesamum indicum	NA	NA	NA	NA	NA
TR2593|c1_g1_i4	420.376	1221.24	1.53859	0.0234633	0.711477	No	PREDICTED: fasciclin-like arabinogalactan protein 13	Sesamum indicum	NA	NA	NA	NA	NA
TR34662|c0_g1_i1	298.402	866.804	1.53845	0.024681	0.726649	No	PREDICTED: uncharacterized protein LOC105166195	Sesamum indicum	NA	NA	NA	NA	NA
TR30975|c0_g4_i1	78.4121	227.72	1.53811	0.0507504	0.91481	No	NA	NA	NA	NA	NA	NA	NA
TR38097|c0_g2_i1	58.8091	170.79	1.53811	0.0591103	0.958854	No	NA	NA	NA	NA	NA	NA	NA
TR38745|c0_g6_i1	19.603	56.93	1.53811	0.0606749	0.964044	No	PREDICTED: pinin	Sesamum indicum	NA	NA	NA	NA	NA
TR39116|c2_g2_i1	19.603	56.93	1.53811	0.0606749	0.964626	No	PREDICTED: uncharacterized protein LOC105158248	Sesamum indicum	NA	NA	NA	NA	NA
TR43361|c0_g5_i1	19.603	56.93	1.53811	0.0606749	0.965209	No	NA	NA	NA	NA	NA	NA	NA
TR26578|c1_g1_i1	19.603	56.93	1.53811	0.0606749	0.964918	No	PREDICTED: protein LONGIFOLIA 2-like	Sesamum indicum	NA	NA	NA	NA	NA
TR29210|c0_g3_i1	19.603	56.93	1.53811	0.0606749	0.964335	No	NA	NA	NA	NA	NA	NA	NA
TR44437|c0_g1_i3	300.58	872.314	1.5371	0.0247599	0.728158	No	PREDICTED: E3 ubiquitin-protein ligase SHPRH isoform X4	Sesamum indicum	NA	NA	NA	NA	NA
TR32191|c2_g1_i6	54.4529	157.935	1.53625	0.0612922	0.968593	No	PREDICTED: SAGA-associated factor 29-like isoform X1	Sesamum indicum	NA	NA	NA	NA	NA
TR37112|c0_g1_i8	54.4529	157.935	1.53625	0.0612922	0.968883	No	hypothetical protein MIMGU_mgv1a009242mg	Mimulus guttatus	NA	NA	NA	NA	NA
TR21800|c0_g1_i2	795.012	2304.74	1.53556	0.0272524	0.759878	No	PREDICTED: probable xyloglucan endotransglucosylase/hydrolase protein 7	Sesamum indicum	NA	NA	NA	NA	NA
TR31939|c0_g2_i3	169.893	492.169	1.53453	0.031519	0.79661	No	PREDICTED: putative E3 ubiquitin-protein ligase XBAT31	Sesamum indicum	NA	NA	NA	NA	NA
TR34509|c0_g1_i3	172.071	497.678	1.53221	0.031567	0.797059	No	hypothetical protein MIMGU_mgv1a019330mg	Mimulus guttatus	NA	oxidation-reduction process[GO:0055114]	heme binding[GO:0020037] ; oxidoreductase activity, acting on paired donors, with incorporation or reduction of molecular oxygen[GO:0016705] ; monooxygenase activity[GO:0004497] ; iron ion binding[GO:0005506]	integral component of membrane[GO:0016021]	NA
TR38345|c0_g3_i3	76.234	220.374	1.53145	0.0526704	0.924118	No	PREDICTED: nuclear transcription factor Y subunit A-1-like	Sesamum indicum	NA	NA	NA	NA	NA
TR23304|c0_g1_i1	45.7404	132.224	1.53145	0.0656549	0.988878	No	hypothetical protein	Malus domestica	NA	NA	NA	NA	NA
TR32849|c1_g2_i3	30.4936	88.1496	1.53145	0.0700504	0.99317	No	hypothetical protein M569_05971, partial	Genlisea aurea	NA	translation[GO:0006412]	structural constituent of ribosome[GO:0003735] ; RNA binding[GO:0003723] ; transferase activity[GO:0016740]	large ribosomal subunit[GO:0015934]	NA
TR34807|c0_g1_i1	30.4936	88.1496	1.53145	0.0700504	0.992902	No	NA	NA	NA	NA	NA	NA	NA
TR38220|c0_g1_i8	30.4936	88.1496	1.53145	0.0700504	0.992635	No	PREDICTED: 1,4-dihydroxy-2-naphthoate polyprenyltransferase, chloroplastic-like isoform X1	Sesamum indicum	NA	NA	NA	NA	NA
TR28440|c0_g2_i8	15.2468	44.0748	1.53145	0.048193	0.905916	No	PREDICTED: macrophage migration inhibitory factor homolog	Sesamum indicum	NA	NA	NA	NA	NA
TR42921|c0_g2_i1	15.2468	44.0748	1.53145	0.048193	0.907211	No	PREDICTED: ultraviolet-B receptor UVR8	Sesamum indicum	NA	NA	NA	NA	NA
TR37956|c2_g2_i9	15.2468	44.0748	1.53145	0.048193	0.907535	No	hypothetical protein MIMGU_mgv1a005975mg	Mimulus guttatus	NA	metabolic process[GO:0008152]	pyridoxal phosphate binding[GO:0030170] ; catalytic activity[GO:0003824]	NA	NA
TR38132|c0_g1_i3	15.2468	44.0748	1.53145	0.048193	0.906887	No	NA	NA	NA	NA	NA	NA	NA
TR38470|c0_g2_i2	15.2468	44.0748	1.53145	0.048193	0.90851	No	NA	NA	NA	NA	NA	NA	NA
TR42103|c0_g4_i1	15.2468	44.0748	1.53145	0.048193	0.90786	No	NA	NA	NA	NA	NA	NA	NA
TR16756|c0_g1_i1	15.2468	44.0748	1.53145	0.048193	0.906239	No	NA	NA	NA	NA	NA	NA	NA
TR1706|c0_g1_i1	15.2468	44.0748	1.53145	0.048193	0.906563	No	predicted protein	Hordeum vulgare subsp. vulgare	NA	NA	NA	NA	NA
TR35414|c1_g1_i11	15.2468	44.0748	1.53145	0.048193	0.908184	No	hypothetical protein CICLE_v10022030mg	Citrus clementina	NA	NA	NA	NA	NA
TR30071|c1_g2_i1	154.646	446.257	1.5289	0.0340207	0.811918	No	NA	NA	NA	NA	NA	NA	NA
TR29310|c1_g1_i2	82.7684	238.739	1.52828	0.0507111	0.914727	No	PREDICTED: uncharacterized protein LOC105168272	Sesamum indicum	NA	NA	NA	NA	NA
TR33833|c0_g6_i3	41.3842	119.369	1.52828	0.0680618	0.981891	No	NA	NA	NA	NA	NA	NA	NA
TR38593|c2_g3_i3	41.3842	119.369	1.52828	0.0680618	0.981622	No	hypothetical protein MIMGU_mgv1a019608mg, partial	Mimulus guttatus	NA	NA	NA	NA	NA
TR35071|c2_g3_i2	93.659	269.958	1.52725	0.0473916	0.900492	No	PREDICTED: uncharacterized protein LOC105161213	Sesamum indicum	NA	NA	NA	NA	NA
TR3674|c0_g1_i3	250.483	721.725	1.52673	0.0272377	0.759872	No	PREDICTED: 21 kDa protein-like	Sesamum indicum	NA	NA	NA	NA	NA
TR31101|c0_g1_i2	156.824	451.767	1.52643	0.0340262	0.811682	No	PREDICTED: fatty acyl-CoA reductase 3-like	Sesamum indicum	NA	NA	NA	NA	NA
TR3507|c2_g2_i5	26.1374	75.2945	1.52643	0.0694841	0.988066	No	PREDICTED: tubulin beta-8 chain-like, partial	Camelina sativa	NA	NA	NA	NA	NA
TR37651|c0_g3_i2	26.1374	75.2945	1.52643	0.0694841	0.988333	No	PREDICTED: transcription factor bHLH130-like	Solanum tuberosum	NA	NA	NA	NA	NA
TR32456|c1_g2_i6	63.1653	181.809	1.52522	0.0593783	0.959066	No	PREDICTED: uncharacterized protein LOC105155197 isoform X1	Sesamum indicum	NA	NA	NA	NA	NA
TR34963|c2_g4_i7	148.112	426.056	1.52436	0.0355605	0.821854	No	NA	NA	NA	NA	NA	NA	NA
TR42094|c0_g1_i4	37.028	106.514	1.52436	0.0703841	0.994688	No	PREDICTED: uncharacterized protein LOC105165107 isoform X2	Sesamum indicum	NA	NA	NA	NA	NA
TR40937|c0_g3_i2	58.8091	168.953	1.52251	0.0618209	0.974317	No	PREDICTED: allantoate deiminase	Sesamum indicum	NA	NA	NA	NA	NA
TR34966|c1_g1_i1	189.496	543.589	1.52035	0.0313977	0.794306	No	hypothetical protein CISIN_1g013221mg	Citrus sinensis	NA	transmembrane transport[GO:0055085]	NA	integral component of membrane[GO:0016021]	NA
TR30201|c5_g3_i1	446.514	1280.01	1.51937	0.0251733	0.736203	No	PREDICTED: LOW QUALITY PROTEIN: uncharacterized protein LOC104613072	Nelumbo nucifera	NA	NA	NA	NA	NA
TR41175|c2_g9_i1	87.1246	249.757	1.51937	0.0506312	0.914539	No	PREDICTED: probable polyamine oxidase 4	Sesamum indicum	NA	NA	NA	NA	NA
TR29422|c0_g1_i2	65.3435	187.318	1.51937	0.0594077	0.958366	No	NA	NA	NA	NA	NA	NA	NA
TR7789|c0_g1_i3	65.3435	187.318	1.51937	0.0594077	0.958073	No	PREDICTED: probable WRKY transcription factor 11	Sesamum indicum	NA	NA	NA	NA	NA
TR37409|c0_g2_i2	54.4529	156.098	1.51937	0.0642569	0.989902	No	PREDICTED: LOW QUALITY PROTEIN: benzyl alcohol O-benzoyltransferase-like	Sesamum indicum	NA	NA	NA	NA	NA
TR38942|c0_g1_i1	54.4529	156.098	1.51937	0.0642569	0.990192	No	PREDICTED: cytochrome P450 714C2-like, partial	Sesamum indicum	NA	NA	NA	NA	NA
TR35041|c0_g4_i1	32.6717	93.659	1.51937	0.0722016	1.00527	No	PREDICTED: probable ribose-5-phosphate isomerase-like	Cicer arietinum	NA	NA	NA	NA	NA
TR39115|c1_g1_i4	32.6717	93.659	1.51937	0.0722016	1.005	No	PREDICTED: inositol-tetrakisphosphate 1-kinase 2-like isoform X1	Sesamum indicum	NA	NA	NA	NA	NA
TR31393|c1_g1_i1	21.7812	62.4393	1.51937	0.0669403	0.986793	No	NA	NA	NA	NA	NA	NA	NA
TR31886|c0_g4_i6	21.7812	62.4393	1.51937	0.0669403	0.986517	No	hypothetical protein MIMGU_mgv1a000542mg	Mimulus guttatus	NA	protein phosphorylation[GO:0006468]	ATP binding[GO:0005524] ; protein serine/threonine kinase activity[GO:0004674]	integral component of membrane[GO:0016021]	NA
TR38713|c1_g1_i4	21.7812	62.4393	1.51937	0.0669403	0.987069	No	hypothetical protein MIMGU_mgv1a011418mg	Mimulus guttatus	NA	NA	nucleic acid binding[GO:0003676] ; nucleotide binding[GO:0000166]	NA	NA
TR42655|c0_g4_i1	21.7812	62.4393	1.51937	0.0669403	0.986241	No	PREDICTED: uncharacterized protein LOC105159987	Sesamum indicum	NA	NA	NA	NA	NA
TR2572|c1_g1_i1	10.8906	31.2197	1.51937	0.0259093	0.746537	No	NA	NA	NA	NA	NA	NA	NA
TR43178|c1_g5_i1	10.8906	31.2197	1.51937	0.0259093	0.746129	No	PREDICTED: protein IQ-DOMAIN 1 isoform X1	Erythranthe guttatus	NA	NA	NA	NA	NA
TR41476|c0_g1_i2	115.44	330.561	1.51777	0.0430905	0.879697	No	PREDICTED: protein NRT1/ PTR FAMILY 8.1-like	Sesamum indicum	NA	NA	NA	NA	NA
TR37300|c2_g4_i1	165.537	473.804	1.51714	0.034065	0.810039	No	PREDICTED: tryptophan aminotransferase-related protein 4-like isoform X1	Erythranthe guttatus	NA	NA	NA	NA	NA
TR34109|c0_g2_i10	71.8778	205.682	1.5168	0.0569409	0.949394	No	NA	NA	NA	NA	NA	NA	NA
TR27088|c0_g1_i2	121.974	348.926	1.51634	0.0417337	0.870901	No	NA	NA	NA	NA	NA	NA	NA
TR39791|c0_g2_i6	50.0967	143.243	1.51568	0.0666617	0.985445	No	PREDICTED: shaggy-related protein kinase alpha-like	Sesamum indicum	NA	NA	NA	NA	NA
TR17874|c0_g1_i1	39.2061	112.023	1.51465	0.0714173	1.00176	No	NA	NA	NA	NA	NA	NA	NA
TR37838|c0_g1_i1	67.5216	192.827	1.51389	0.0593826	0.958842	No	PREDICTED: uncharacterized protein LOC105162016	Sesamum indicum	NA	NA	NA	NA	NA
TR40940|c0_g1_i7	67.5216	192.827	1.51389	0.0593826	0.958548	No	NA	NA	NA	NA	NA	NA	NA
TR43328|c1_g4_i5	84.9465	242.411	1.51283	0.0524413	0.9241	No	PREDICTED: calcium permeable stress-gated cation channel 1-like	Sesamum indicum	NA	NA	NA	NA	NA
TR27055|c0_g1_i1	84.9465	242.411	1.51283	0.0524413	0.924719	No	PREDICTED: uncharacterized protein LOC105178910	Sesamum indicum	NA	NA	NA	NA	NA
TR32545|c0_g1_i3	84.9465	242.411	1.51283	0.0524413	0.92441	No	hypothetical protein MIMGU_mgv1a008849mg	Mimulus guttatus	NA	transmembrane transport[GO:0055085]	transmembrane transporter activity[GO:0022857]	integral component of membrane[GO:0016021]	NA
TR23928|c0_g1_i3	56.631	161.608	1.51283	0.0645155	0.985812	No	NA	NA	NA	NA	NA	NA	NA
TR43633|c1_g1_i11	28.3155	80.8038	1.51283	0.0727481	1.00994	No	transducin/WD40 repeat-like superfamily protein, partial	Carica papaya	NA	NA	NA	NA	NA
TR37668|c0_g1_i5	102.371	291.996	1.51213	0.0473405	0.900171	No	hypothetical protein MIMGU_mgv1a008665mg	Mimulus guttatus	NA	methylation[GO:0032259]	methyltransferase activity[GO:0008168]	NA	NA
TR34870|c0_g1_i1	324.539	925.571	1.51195	0.026714	0.753645	No	PREDICTED: extra-large guanine nucleotide-binding protein 1	Sesamum indicum	NA	NA	NA	NA	NA
TR31816|c0_g2_i2	74.0559	211.192	1.51187	0.0568572	0.948598	No	NA	NA	NA	NA	NA	NA	NA
TR34225|c0_g1_i3	422.554	1204.71	1.51148	0.0259166	0.745932	No	PREDICTED: uncharacterized protein LOC105177106	Sesamum indicum	NA	NA	NA	NA	NA
TR30763|c0_g1_i10	45.7404	130.388	1.51127	0.0693301	0.987476	No	PREDICTED: serine/threonine-protein kinase BRI1-like 2	Erythranthe guttatus	NA	NA	NA	NA	NA
TR32456|c1_g2_i8	45.7404	130.388	1.51127	0.0693301	0.987744	No	PREDICTED: uncharacterized protein LOC105155250	Sesamum indicum	NA	NA	NA	NA	NA
TR41309|c0_g2_i6	98.0152	279.14	1.50991	0.0488706	0.907638	No	PREDICTED: probable alpha,alpha-trehalose-phosphate synthase [UDP-forming] 11	Sesamum indicum	NA	NA	NA	NA	NA
TR32235|c2_g1_i9	174.249	495.842	1.50873	0.0341392	0.809975	No	PREDICTED: ethylene-responsive transcription factor 5-like	Sesamum indicum	NA	NA	NA	NA	NA
TR39318|c2_g2_i1	87.1246	247.921	1.50873	0.0523606	0.923915	No	Selenium-binding protein 1 isoform 2	Theobroma cacao	NA	NA	selenium binding[GO:0008430]	NA	NA
TR26052|c0_g6_i1	34.8498	99.1683	1.50873	0.073838	1.01385	No	NA	NA	NA	NA	NA	NA	NA
TR18109|c0_g2_i1	34.8498	99.1683	1.50873	0.073838	1.01464	No	NA	NA	NA	NA	NA	NA	NA
TR25366|c0_g1_i2	34.8498	99.1683	1.50873	0.073838	1.01358	No	hypothetical protein MIMGU_mgv1a011155mg	Mimulus guttatus	NA	NA	NA	NA	NA
TR3589|c1_g1_i9	34.8498	99.1683	1.50873	0.073838	1.01438	No	PREDICTED: ethylene-responsive transcription factor WRI1-like	Nicotiana sylvestris	NA	NA	NA	NA	NA
TR44799|c1_g2_i2	34.8498	99.1683	1.50873	0.073838	1.01411	No	PREDICTED: CBL-interacting serine/threonine-protein kinase 3 isoform X1	Sesamum indicum	NA	NA	NA	NA	NA
TR29475|c0_g2_i2	17.4249	49.5842	1.50873	0.0591325	0.957151	No	NA	NA	NA	NA	NA	NA	NA
TR3803|c0_g3_i2	17.4249	49.5842	1.50873	0.0591325	0.958329	No	PREDICTED: dynamin-2A-like	Sesamum indicum	NA	NA	NA	NA	NA
TR41565|c0_g5_i1	17.4249	49.5842	1.50873	0.0591325	0.958624	No	hypothetical protein MIMGU_mgv1a0041261mg, partial	Mimulus guttatus	NA	cell redox homeostasis[GO:0045454]	NA	cell[GO:0005623]	NA
TR43323|c1_g7_i1	17.4249	49.5842	1.50873	0.0591325	0.958034	No	NA	NA	NA	NA	NA	NA	NA
TR2474|c0_g3_i3	17.4249	49.5842	1.50873	0.0591325	0.957445	No	NA	NA	NA	NA	NA	NA	NA
TR29574|c0_g3_i1	17.4249	49.5842	1.50873	0.0591325	0.957739	No	PREDICTED: probable serine/threonine-protein kinase Cx32, chloroplastic isoform X2	Sesamum indicum	NA	NA	NA	NA	NA
TR34853|c0_g1_i3	250.483	712.543	1.50826	0.0291705	0.777158	No	PREDICTED: protein GPR107-like	Sesamum indicum	NA	NA	NA	NA	NA
TR2123|c0_g1_i1	111.084	315.869	1.50768	0.0457025	0.896534	No	NA	NA	NA	NA	NA	NA	NA
TR29196|c0_g2_i1	100.193	284.65	1.5064	0.0488272	0.907472	No	PREDICTED: uncharacterized protein LOC105177873	Sesamum indicum	NA	NA	NA	NA	NA
TR35239|c0_g1_i2	100.193	284.65	1.5064	0.0488272	0.907152	No	NA	NA	NA	NA	NA	NA	NA
TR43453|c1_g2_i4	82.7684	235.066	1.50591	0.0543876	0.942008	No	PREDICTED: MADS-box transcription factor 23-like	Sesamum indicum	NA	NA	NA	NA	NA
TR32211|c0_g3_i3	41.3842	117.533	1.50591	0.0722015	1.00553	No	AF363286_1aluminium induced protein	Avicennia marina	NA	NA	NA	NA	NA
TR40760|c0_g1_i2	2082.28	5913.37	1.50582	0.0542829	0.941435	No	PREDICTED: probable leucine-rich repeat receptor-like protein kinase At5g49770 isoform X2	Sesamum indicum	NA	NA	NA	NA	NA
TR39963|c2_g8_i1	65.3435	185.481	1.50516	0.0619413	0.974757	No	NA	NA	NA	NA	NA	NA	NA
TR29630|c0_g1_i3	143.756	407.692	1.50386	0.0390117	0.860102	No	PREDICTED: RING-H2 finger protein ATL74	Vitis vinifera	NA	NA	metal ion binding[GO:0046872]	membrane[GO:0016020]	NA
TR2858|c0_g3_i1	47.9185	135.897	1.50386	0.0697721	0.990824	No	MYB-related transcription factor	Salvia miltiorrhiza	NA	NA	NA	NA	NA
TR44169|c1_g1_i1	47.9185	135.897	1.50386	0.0697721	0.991091	No	PREDICTED: protein IQ-DOMAIN 32-like	Sesamum indicum	NA	NA	NA	NA	NA
TR29721|c0_g3_i1	47.9185	135.897	1.50386	0.0697721	0.99029	No	PREDICTED: solute carrier family 35 member F1-like isoform X2	Sesamum indicum	NA	NA	NA	NA	NA
TR41306|c0_g5_i2	47.9185	135.897	1.50386	0.0697721	0.990557	No	PREDICTED: solute carrier family 40 member 3, chloroplastic isoform X2	Sesamum indicum	NA	NA	NA	NA	NA
TR34515|c1_g2_i1	23.9593	67.9487	1.50386	0.071813	1.00251	No	NA	NA	NA	NA	NA	NA	NA
TR39702|c0_g1_i3	23.9593	67.9487	1.50386	0.071813	1.00304	No	NA	NA	NA	NA	NA	NA	NA
TR32425|c0_g2_i2	23.9593	67.9487	1.50386	0.071813	1.00331	No	NA	NA	NA	NA	NA	NA	NA
TR38628|c0_g4_i1	23.9593	67.9487	1.50386	0.071813	1.00357	No	NA	NA	NA	NA	NA	NA	NA
TR36871|c0_g1_i2	23.9593	67.9487	1.50386	0.071813	1.00224	No	BnaC03g38050D	Brassica napus	NA	amino acid transmembrane transport[GO:0003333]	amino acid transmembrane transporter activity[GO:0015171]	integral component of membrane[GO:0016021]	NA
TR38232|c0_g1_i1	23.9593	67.9487	1.50386	0.071813	1.00277	No	PREDICTED: 60S ribosomal protein L18a-like protein	Sesamum indicum	NA	NA	NA	NA	NA
TR30882|c0_g3_i1	204.743	580.318	1.50303	0.0322608	0.803408	No	PREDICTED: phosphoethanolamine N-methyltransferase 1-like	Sesamum indicum	NA	NA	NA	NA	NA
TR30834|c1_g1_i3	78.4121	222.21	1.50278	0.0566222	0.946777	No	NA	NA	NA	NA	NA	NA	NA
TR33601|c0_g4_i1	54.4529	154.262	1.5023	0.0673712	0.984603	No	hypothetical protein MIMGU_mgv1a003213mg	Mimulus guttatus	NA	NA	NA	NA	NA
TR19144|c0_g1_i1	30.4936	86.3132	1.50107	0.0754533	1.01176	No	NA	NA	NA	NA	NA	NA	NA
TR28101|c0_g1_i4	30.4936	86.3132	1.50107	0.0754533	1.01279	No	NA	NA	NA	NA	NA	NA	NA
TR31781|c0_g4_i1	30.4936	86.3132	1.50107	0.0754533	1.01228	No	PREDICTED: uncharacterized protein LOC105161353	Sesamum indicum	NA	NA	NA	NA	NA
TR42215|c0_g3_i1	30.4936	86.3132	1.50107	0.0754533	1.01253	No	hypothetical protein MIMGU_mgv1a011704mg	Mimulus guttatus	NA	sodium ion transport[GO:0006814] ; hydrogen ion transmembrane transport[GO:1902600] ; potassium ion homeostasis[GO:0055075] ; response to salt stress[GO:0009651]	solute:proton antiporter activity[GO:0015299]	integral component of membrane[GO:0016021] ; vacuolar membrane[GO:0005774] ; plasma membrane[GO:0005886]	NA
TR43933|c0_g6_i1	30.4936	86.3132	1.50107	0.0754533	1.01305	No	PREDICTED: protein SMG7L	Sesamum indicum	NA	NA	NA	NA	NA
TR38471|c0_g3_i1	30.4936	86.3132	1.50107	0.0754533	1.01202	No	PREDICTED: uncharacterized protein LOC105175222	Sesamum indicum	NA	NA	NA	NA	NA
TR7473|c0_g1_i4	30.4936	86.3132	1.50107	0.0754533	1.0115	No	PREDICTED: MYB-like transcription factor ETC3	Sesamum indicum	NA	NA	NA	NA	NA
TR41492|c0_g3_i1	620.763	1755.65	1.49989	0.0282795	0.764244	No	PREDICTED: receptor-like protein kinase HAIKU2	Sesamum indicum	NA	NA	NA	NA	NA
TR25002|c0_g2_i1	37.028	104.678	1.49927	0.0750641	1.0169	No	acetolactate synthase, partial	Monochoria vaginalis	NA	NA	thiamine pyrophosphate binding[GO:0030976]	NA	NA
TR2652|c2_g2_i14	37.028	104.678	1.49927	0.0750641	1.01716	No	NA	NA	NA	NA	NA	NA	NA
TR12307|c0_g1_i1	154.646	437.075	1.49891	0.0378832	0.846204	No	hypothetical protein BVRB_7g177280	Beta vulgaris subsp. vulgaris	NA	NA	NA	NA	NA
TR38737|c0_g6_i2	80.5903	227.72	1.49858	0.0564808	0.946215	No	NA	NA	NA	NA	NA	NA	NA
TR8252|c2_g1_i1	143.756	405.855	1.49735	0.0399177	0.860977	No	PREDICTED: uncharacterized protein At5g05190	Sesamum indicum	NA	NA	NA	NA	NA
TR31236|c7_g3_i1	437.801	1235.93	1.49725	0.027277	0.759358	No	polyubiquitin	Lemna minor	NA	NA	NA	NA	NA
TR38321|c0_g3_i9	100.193	282.813	1.49706	0.0503155	0.911964	No	hypothetical protein EUGRSUZ_L013831, partial	Eucalyptus grandis	NA	NA	nucleic acid binding[GO:0003676] ; nucleotide binding[GO:0000166]	NA	NA
TR30952|c2_g1_i8	56.631	159.771	1.49634	0.067561	0.986829	No	TdcA1-ORF1-ORF2	Daucus carota	NA	NA	NA	NA	NA
TR42776|c0_g6_i3	189.496	534.407	1.49577	0.0343219	0.81175	No	PREDICTED: uncharacterized protein LOC105165171	Sesamum indicum	NA	NA	NA	NA	NA
TR32517|c1_g9_i2	63.1653	178.136	1.49577	0.0646816	0.982933	No	beta-tubulin, partial	Vanilla planifolia	NA	microtubule-based process[GO:0007017] ; metabolic process[GO:0008152]	structural constituent of cytoskeleton[GO:0005200] ; GTP binding[GO:0005525] ; GTPase activity[GO:0003924]	microtubule[GO:0005874]	NA
TR44248|c4_g1_i6	82.7684	233.229	1.4946	0.056329	0.947287	No	PREDICTED: subtilisin-like protease	Sesamum indicum	NA	NA	NA	NA	NA
TR7878|c0_g12_i1	479.185	1349.79	1.49408	0.0276578	0.760316	No	PREDICTED: protein EARLY RESPONSIVE TO DEHYDRATION 15	Sesamum indicum	NA	NA	NA	NA	NA
TR34407|c0_g1_i1	167.715	471.968	1.49268	0.0369163	0.837029	No	PREDICTED: cinnamoyl-CoA reductase 1-like	Sesamum indicum	NA	NA	NA	NA	NA
TR36738|c0_g2_i5	287.511	808.038	1.49081	0.029765	0.779588	No	hypothetical protein MIMGU_mgv1a011760mg	Mimulus guttatus	NA	NA	NA	NA	NA
TR28449|c1_g1_i4	124.153	348.926	1.49081	0.0450052	0.895868	No	PREDICTED: geraniol 8-hydroxylase-like	Sesamum indicum	NA	NA	NA	NA	NA
TR3712|c1_g1_i6	98.0152	275.468	1.49081	0.051942	0.919299	No	PREDICTED: uncharacterized protein LOC105156381	Sesamum indicum	NA	NA	NA	NA	NA
TR41747|c0_g5_i6	84.9465	238.739	1.49081	0.0561702	0.94643	No	PREDICTED: E3 ubiquitin-protein ligase RHF2A	Sesamum indicum	NA	NA	NA	NA	NA
TR33714|c0_g1_i1	71.8778	202.01	1.49081	0.0615643	0.971435	No	PREDICTED: uncharacterized protein LOC105162365	Sesamum indicum	NA	NA	NA	NA	NA
TR30121|c1_g8_i2	45.7404	128.552	1.49081	0.0732275	1.01073	No	hypothetical protein AMTR_s00010p00192110	Amborella trichopoda	NA	translation[GO:0006412]	structural constituent of ribosome[GO:0003735]	ribosome[GO:0005840]	NA
TR36058|c0_g4_i2	45.7404	128.552	1.49081	0.0732275	1.011	No	hypothetical protein MIMGU_mgv1a007374mg	Mimulus guttatus	NA	oxidation-reduction process[GO:0055114]	oxidoreductase activity[GO:0016491]	NA	NA
TR13642|c0_g1_i1	39.2061	110.187	1.49081	0.0759657	1.0104	No	PREDICTED: uncharacterized protein LOC105960828, partial	Erythranthe guttatus	NA	NA	NA	NA	NA
TR3315|c0_g2_i2	39.2061	110.187	1.49081	0.0759657	1.01066	No	protein ralf-like 34	Arabidopsis thaliana	NA	cell-cell signaling[GO:0007267] ; calcium-mediated signaling[GO:0019722]	signal transducer activity[GO:0004871]	plasmodesma[GO:0009506] ; apoplast[GO:0048046]	NA
TR39411|c0_g4_i11	32.6717	91.8225	1.49081	0.0774979	1.01894	No	PREDICTED: serine/threonine-protein kinase D6PK	Sesamum indicum	NA	NA	NA	NA	NA
TR40174|c0_g1_i3	32.6717	91.8225	1.49081	0.0774979	1.0192	No	PREDICTED: uncharacterized protein LOC105949855	Erythranthe guttatus	NA	NA	NA	NA	NA
TR14292|c0_g1_i1	26.1374	73.458	1.49081	0.075654	1.01213	No	unnamed protein product	Vitis vinifera	NA	NA	NA	NA	NA
TR30011|c0_g1_i10	26.1374	73.458	1.49081	0.075654	1.01316	No	hypothetical protein MIMGU_mgv1a009906mg	Mimulus guttatus	NA	phospholipid biosynthetic process[GO:0008654]	CDP-diacylglycerol-glycerol-3-phosphate 3-phosphatidyltransferase activity[GO:0008444]	integral component of membrane[GO:0016021]	map00564:Glycerophospholipid metabolism(3-phosphatidyltransferase[ec:2.7.8.5])
TR35186|c0_g2_i1	26.1374	73.458	1.49081	0.075654	1.01265	No	hypothetical protein CISIN_1g043525mg	Citrus sinensis	NA	NA	NA	NA	NA
TR3669|c0_g4_i1	26.1374	73.458	1.49081	0.075654	1.01239	No	PREDICTED: keratin-associated protein 21-1 isoform X4	Sesamum indicum	NA	NA	NA	NA	NA
TR43384|c0_g3_i6	26.1374	73.458	1.49081	0.075654	1.01291	No	PREDICTED: probable WRKY transcription factor 26	Sesamum indicum	NA	NA	NA	NA	NA
TR34628|c0_g11_i3	19.603	55.0935	1.49081	0.067576	0.985409	No	NA	NA	NA	NA	NA	NA	NA
TR42182|c0_g3_i3	19.603	55.0935	1.49081	0.067576	0.986502	No	hypothetical protein MIMGU_mgv1a005904mg	Mimulus guttatus	NA	NA	NA	NA	NA
TR44164|c4_g13_i1	19.603	55.0935	1.49081	0.067576	0.985955	No	PREDICTED: ankyrin-1-like, partial	Erythranthe guttatus	NA	NA	NA	NA	NA
TR29995|c0_g3_i1	19.603	55.0935	1.49081	0.067576	0.984864	No	NA	NA	NA	NA	NA	NA	NA
TR33084|c0_g2_i1	19.603	55.0935	1.49081	0.067576	0.985136	No	PREDICTED: protein FLUORESCENT IN BLUE LIGHT, chloroplastic	Sesamum indicum	NA	NA	NA	NA	NA
TR39792|c0_g2_i3	19.603	55.0935	1.49081	0.067576	0.985682	No	NA	NA	NA	NA	NA	NA	NA
TR41730|c0_g5_i1	19.603	55.0935	1.49081	0.067576	0.986775	No	PREDICTED: uncharacterized protein LOC105166786 isoform X1	Sesamum indicum	NA	NA	NA	NA	NA
TR41856|c0_g4_i1	19.603	55.0935	1.49081	0.067576	0.986228	No	NA	NA	NA	NA	NA	NA	NA
TR17273|c0_g1_i1	13.0687	36.729	1.49081	0.0410363	0.873303	No	hypothetical protein CARUB_v10014752mg, partial	Capsella rubella	NA	protein transport[GO:0015031]	protein transporter activity[GO:0008565]	NA	NA
TR43337|c2_g5_i1	13.0687	36.729	1.49081	0.0410363	0.87295	No	PREDICTED: CDPK-related protein kinase isoform X2	Sesamum indicum	NA	NA	NA	NA	NA
TR30736|c1_g2_i1	13.0687	36.729	1.49081	0.0410363	0.872246	No	hypothetical protein MIMGU_mgv1a010400mg	Mimulus guttatus	NA	NA	NA	NA	NA
TR30911|c0_g2_i5	13.0687	36.729	1.49081	0.0410363	0.873656	No	NA	NA	NA	NA	NA	NA	NA
TR22395|c0_g1_i2	13.0687	36.729	1.49081	0.0410363	0.872598	No	NA	NA	NA	NA	NA	NA	NA
TR2355|c0_g1_i1	13.0687	36.729	1.49081	0.0410363	0.871894	No	NA	NA	NA	NA	NA	NA	NA
TR7966|c0_g1_i7	246.127	690.505	1.48825	0.0315967	0.793625	No	PREDICTED: acylamino-acid-releasing enzyme-like isoform X2	Sesamum indicum	NA	NA	NA	NA	NA
TR41479|c0_g2_i2	1568.24	4398.3	1.4878	0.046049	0.896653	No	unknown	Lotus japonicus	NA	carbohydrate metabolic process[GO:0005975]	glycogen phosphorylase activity[GO:0008184]	NA	NA
TR43623|c2_g1_i7	87.1246	244.248	1.48719	0.0560074	0.944594	No	hypothetical protein MIMGU_mgv1a001060mg	Mimulus guttatus	NA	NA	NA	NA	NA
TR9900|c0_g1_i1	74.0559	207.519	1.48656	0.0613715	0.969555	No	PREDICTED: adenosylhomocysteinase	Sesamum indicum	NA	NA	NA	NA	NA
TR39786|c0_g1_i1	890.849	2495.74	1.48621	0.0335839	0.815536	No	PREDICTED: uncharacterized aarF domain-containing protein kinase At1g79600, chloroplastic	Sesamum indicum	NA	NA	NA	NA	NA
TR30112|c0_g1_i1	67.5216	189.154	1.48614	0.0644385	0.98578	No	NA	NA	NA	NA	NA	NA	NA
TR34113|c0_g2_i1	67.5216	189.154	1.48614	0.0644385	0.985494	No	PREDICTED: dnaJ homolog subfamily B member 4	Sesamum indicum	NA	NA	NA	NA	NA
TR41156|c0_g1_i7	67.5216	189.154	1.48614	0.0644385	0.986066	No	unnamed protein product	Coffea canephora	NA	NA	NA	NA	NA
TR43627|c0_g6_i1	60.9872	170.79	1.48564	0.067615	0.984614	No	hypothetical protein MIMGU_mgv1a0244301mg, partial	Mimulus guttatus	NA	methylation[GO:0032259]	methyltransferase activity[GO:0008168]	NA	NA
TR44572|c1_g1_i3	278.799	780.491	1.48516	0.0306622	0.78781	No	hypothetical protein MIMGU_mgv1a001054mg	Mimulus guttatus	NA	carbohydrate metabolic process[GO:0005975]	carbohydrate binding[GO:0030246] ; hydrolase activity, hydrolyzing O-glycosyl compounds[GO:0004553]	NA	NA
TR36166|c0_g2_i3	54.4529	152.425	1.48502	0.0706429	0.996741	No	PREDICTED: serine/threonine-protein phosphatase PP1 isozyme 3 isoform X1	Sesamum indicum	NA	NA	NA	NA	NA
TR27334|c0_g1_i1	47.9185	134.061	1.48423	0.0735486	1.01304	No	NA	NA	NA	NA	NA	NA	NA
TR8238|c0_g2_i2	47.9185	134.061	1.48423	0.0735486	1.01331	No	PREDICTED: arginine decarboxylase-like	Fragaria vesca subsp. vesca	NA	NA	NA	NA	NA
TR2989|c0_g2_i2	47.9185	134.061	1.48423	0.0735486	1.01357	No	hypothetical protein CICLE_v10009504mg	Citrus clementina	NA	transcription, DNA-templated[GO:0006351]	DNA-directed RNA polymerase activity[GO:0003899] ; DNA binding[GO:0003677]	nucleus[GO:0005634]	map00240:Pyrimidine metabolism(RNA polymerase[ec:2.7.7.6]) ; map00230:Purine metabolism(RNA polymerase[ec:2.7.7.6])
TR7717|c0_g1_i4	137.221	383.818	1.48392	0.0431326	0.879534	No	PREDICTED: sugar transporter ERD6-like 7	Sesamum indicum	NA	NA	NA	NA	NA
TR42525|c1_g1_i1	82.7684	231.393	1.48319	0.0583426	0.957012	No	PREDICTED: uncharacterized protein LOC105163552	Sesamum indicum	NA	NA	NA	NA	NA
TR37975|c0_g1_i6	41.3842	115.696	1.48319	0.0766128	1.0144	No	NA	NA	NA	NA	NA	NA	NA
TR36279|c2_g1_i10	41.3842	115.696	1.48319	0.0766128	1.01491	No	NA	NA	NA	NA	NA	NA	NA
TR38272|c0_g1_i3	41.3842	115.696	1.48319	0.0766128	1.01465	No	PREDICTED: triacylglycerol lipase 1 isoform X1	Sesamum indicum	NA	NA	NA	NA	NA
TR39727|c3_g2_i4	241.771	675.814	1.48299	0.0324215	0.804746	No	NA	NA	NA	NA	NA	NA	NA
TR7603|c1_g2_i1	111.084	310.36	1.48229	0.0497042	0.911549	No	PREDICTED: vacuolar protein sorting-associated protein 2 homolog 2-like	Sesamum indicum	NA	NA	NA	NA	NA
TR33978|c1_g1_i6	69.6997	194.664	1.48176	0.0642466	0.990612	No	PREDICTED: tubulin-folding cofactor C	Sesamum indicum	NA	NA	NA	NA	NA
TR42921|c0_g3_i5	69.6997	194.664	1.48176	0.0642466	0.990323	No	hypothetical protein MIMGU_mgv1a004258mg	Mimulus guttatus	NA	NA	NA	NA	NA
TR42550|c0_g2_i1	34.8498	97.3319	1.48176	0.0790026	1.01789	No	PREDICTED: pentatricopeptide repeat-containing protein At5g25630	Sesamum indicum	NA	NA	NA	NA	NA
TR7880|c1_g2_i4	56.631	157.935	1.47966	0.0707562	0.997804	No	PREDICTED: uncharacterized protein LOC105174256	Sesamum indicum	NA	NA	NA	NA	NA
TR36005|c0_g1_i1	28.3155	78.9674	1.47966	0.0787585	1.01798	No	PREDICTED: glutathione S-transferase 2-like	Sesamum indicum	NA	NA	NA	NA	NA
TR21940|c0_g1_i1	28.3155	78.9674	1.47966	0.0787585	1.01848	No	PREDICTED: uncharacterized protein LOC105173250	Sesamum indicum	NA	NA	NA	NA	NA
TR32995|c0_g5_i2	28.3155	78.9674	1.47966	0.0787585	1.01823	No	NA	NA	NA	NA	NA	NA	NA
TR33250|c0_g3_i2	248.305	692.342	1.47937	0.0325342	0.806026	No	PREDICTED: NADPH-dependent 1-acyldihydroxyacetone phosphate reductase-like	Sesamum indicum	NA	NA	NA	NA	NA
TR7358|c2_g1_i1	100.193	279.14	1.4782	0.0534326	0.932213	No	PREDICTED: polyol transporter 5-like isoform X1	Sesamum indicum	NA	NA	NA	NA	NA
TR26591|c0_g1_i3	50.0967	139.57	1.4782	0.0737829	1.01494	No	hypothetical protein M569_04305, partial	Genlisea aurea	NA	NA	NA	NA	NA
TR34698|c0_g1_i1	50.0967	139.57	1.4782	0.0737829	1.01468	No	PREDICTED: RING-H2 finger protein ATL7-like	Sesamum indicum	NA	NA	NA	NA	NA
TR33093|c0_g1_i1	172.071	479.313	1.47796	0.0383593	0.85358	No	NA	NA	NA	NA	NA	NA	NA
TR2209|c0_g3_i3	65.3435	181.809	1.47631	0.0673495	0.985106	No	PREDICTED: iron-sulfur assembly protein IscA, chloroplastic	Sesamum indicum	NA	NA	NA	NA	NA
TR34760|c2_g1_i5	65.3435	181.809	1.47631	0.0673495	0.984832	No	hypothetical protein PHAVU_009G119900g	Phaseolus vulgaris	NA	NA	DNA binding[GO:0003677]	NA	NA
TR42679|c0_g5_i6	43.5623	121.206	1.47631	0.0770626	1.01728	No	PREDICTED: zinc finger CCCH domain-containing protein 48-like	Sesamum indicum	NA	NA	NA	NA	NA
TR42516|c2_g1_i11	43.5623	121.206	1.47631	0.0770626	1.01754	No	PREDICTED: receptor-like protein kinase HSL1	Sesamum indicum	NA	NA	NA	NA	NA
TR24609|c0_g1_i1	21.7812	60.6029	1.47631	0.0739595	1.01314	No	PREDICTED: uncharacterized protein LOC103951096	Pyrus x bretschneideri	NA	NA	NA	NA	NA
TR31443|c3_g1_i1	21.7812	60.6029	1.47631	0.0739595	1.01367	No	PREDICTED: auxin-responsive protein IAA14	Sesamum indicum	NA	NA	NA	NA	NA
TR42623|c1_g4_i1	21.7812	60.6029	1.47631	0.0739595	1.01235	No	PREDICTED: TOM1-like protein 2	Sesamum indicum	NA	NA	NA	NA	NA
TR3146|c1_g1_i3	21.7812	60.6029	1.47631	0.0739595	1.0134	No	PREDICTED: uncharacterized protein LOC105952050	Erythranthe guttatus	NA	NA	NA	NA	NA
TR32359|c0_g5_i1	21.7812	60.6029	1.47631	0.0739595	1.01261	No	NA	NA	NA	NA	NA	NA	NA
TR32504|c1_g1_i2	21.7812	60.6029	1.47631	0.0739595	1.01182	No	NA	NA	NA	NA	NA	NA	NA
TR34863|c0_g1_i1	21.7812	60.6029	1.47631	0.0739595	1.01288	No	NA	NA	NA	NA	NA	NA	NA
TR7841|c0_g6_i1	21.7812	60.6029	1.47631	0.0739595	1.01209	No	NA	NA	NA	NA	NA	NA	NA
TR3412|c5_g4_i2	21.7812	60.6029	1.47631	0.0739595	1.01156	No	NA	NA	NA	NA	NA	NA	NA
TR7416|c0_g1_i5	211.277	587.664	1.47585	0.0351103	0.816466	No	PREDICTED: uncharacterized protein LOC105160472	Sesamum indicum	NA	NA	NA	NA	NA
TR3634|c2_g1_i1	616.407	1713.41	1.47491	0.0307524	0.788971	No	PREDICTED: cysteine proteinase 3-like	Sesamum indicum	NA	NA	NA	NA	NA
TR37110|c2_g1_i1	58.8091	163.444	1.47469	0.0707533	0.998031	No	PREDICTED: vacuolar amino acid transporter 1	Erythranthe guttatus	NA	NA	NA	NA	NA
TR43840|c4_g1_i13	95.8371	266.285	1.47432	0.0553632	0.937633	No	hypothetical protein MIMGU_mgv1a002448mg	Mimulus guttatus	NA	L-arabinose metabolic process[GO:0046373]	alpha-L-arabinofuranosidase activity[GO:0046556]	NA	map00520:Amino sugar and nucleotide sugar metabolism(end alpha-L-arabinofuranosidase[ec:3.2.1.55])
TR22867|c0_g1_i1	37.028	102.841	1.47373	0.0800814	1.02303	No	NA	NA	NA	NA	NA	NA	NA
TR42880|c2_g3_i8	37.028	102.841	1.47373	0.0800814	1.02353	No	PREDICTED: uncharacterized protein LOC105156425 isoform X2	Sesamum indicum	NA	NA	NA	NA	NA
TR8068|c0_g1_i3	37.028	102.841	1.47373	0.0800814	1.02328	No	NA	NA	NA	NA	NA	NA	NA
TR36365|c1_g1_i2	659.969	1832.78	1.47356	0.031449	0.795222	No	PREDICTED: UDP-glycosyltransferase 83A1	Sesamum indicum	NA	NA	NA	NA	NA
TR29817|c0_g2_i3	424.732	1179	1.47294	0.0297995	0.778556	No	NA	NA	NA	NA	NA	NA	NA
TR28750|c1_g1_i4	1289.44	3577.4	1.47216	0.0424378	0.87691	No	Oxygen-evolving enhancer protein 3-1	Populus trichocarpa	NA	photosynthesis[GO:0015979]	calcium ion binding[GO:0005509]	photosystem II oxygen evolving complex[GO:0009654] ; extrinsic component of membrane[GO:0019898]	NA
TR40968|c1_g1_i13	67.5216	187.318	1.47207	0.0671314	0.987675	No	PREDICTED: receptor-like protein 12	Erythranthe guttatus	NA	NA	NA	NA	NA
TR34213|c0_g2_i3	618.585	1715.24	1.47137	0.0311534	0.792695	No	NA	NA	NA	NA	NA	NA	NA
TR39740|c2_g5_i3	274.443	760.29	1.47005	0.0325579	0.806233	No	NA	NA	NA	NA	NA	NA	NA
TR44593|c0_g1_i7	137.221	380.145	1.47005	0.0452459	0.894911	No	PREDICTED: probable LRR receptor-like serine/threonine-protein kinase At1g06840	Sesamum indicum	NA	NA	NA	NA	NA
TR3152|c0_g3_i2	45.7404	126.715	1.47005	0.077361	1.01867	No	hypothetical protein MIMGU_mgv1a009585mg	Mimulus guttatus	NA	glucose metabolic process[GO:0006006] ; oxidation-reduction process[GO:0055114]	NAD binding[GO:0051287] ; oxidoreductase activity, acting on the aldehyde or oxo group of donors, NAD or NADP as acceptor[GO:0016620] ; NADP binding[GO:0050661]	NA	NA
TR42669|c0_g1_i1	45.7404	126.715	1.47005	0.077361	1.01893	No	NA	NA	NA	NA	NA	NA	NA
TR40188|c0_g1_i1	30.4936	84.4767	1.47005	0.0813174	1.02539	No	PREDICTED: lysosomal beta glucosidase-like	Sesamum indicum	NA	NA	NA	NA	NA
TR35498|c0_g4_i3	30.4936	84.4767	1.47005	0.0813174	1.02638	No	NA	NA	NA	NA	NA	NA	NA
TR36166|c0_g5_i2	30.4936	84.4767	1.47005	0.0813174	1.02564	No	NA	NA	NA	NA	NA	NA	NA
TR36809|c0_g1_i4	30.4936	84.4767	1.47005	0.0813174	1.02588	No	PREDICTED: acyl-coenzyme A thioesterase 9, mitochondrial-like isoform X1	Sesamum indicum	NA	NA	NA	NA	NA
TR38504|c0_g5_i5	30.4936	84.4767	1.47005	0.0813174	1.02613	No	hypothetical protein MIMGU_mgv1a006570mg	Mimulus guttatus	NA	NA	zinc ion binding[GO:0008270]	NA	NA
TR35893|c1_g1_i8	15.2468	42.2384	1.47005	0.0550019	0.942422	No	PREDICTED: probable xyloglucan endotransglucosylase/hydrolase protein 8	Sesamum indicum	NA	NA	NA	NA	NA
TR42637|c0_g4_i1	15.2468	42.2384	1.47005	0.0550019	0.941809	No	hypothetical protein B456_001G192800	Gossypium raimondii	NA	regulation of transcription, DNA-templated[GO:0006355] ; transcription, DNA-templated[GO:0006351]	NA	NA	NA
TR2756|c2_g1_i1	15.2468	42.2384	1.47005	0.0550019	0.943343	No	NA	NA	NA	NA	NA	NA	NA
TR2861|c2_g2_i1	15.2468	42.2384	1.47005	0.0550019	0.94365	No	NA	NA	NA	NA	NA	NA	NA
TR36674|c0_g1_i1	15.2468	42.2384	1.47005	0.0550019	0.941503	No	hypothetical protein POPTR_0017s03070g, partial	Populus trichocarpa	NA	NA	NA	NA	NA
TR38917|c0_g4_i1	15.2468	42.2384	1.47005	0.0550019	0.943036	No	NA	NA	NA	NA	NA	NA	NA
TR41489|c0_g2_i8	15.2468	42.2384	1.47005	0.0550019	0.942729	No	PREDICTED: topless-related protein 1-like	Sesamum indicum	NA	NA	NA	NA	NA
TR11308|c0_g2_i1	15.2468	42.2384	1.47005	0.0550019	0.940892	No	PREDICTED: uncharacterized calcium-binding protein At1g02270-like	Musa acuminata subsp. malaccensis	NA	NA	NA	NA	NA
TR41326|c0_g3_i1	15.2468	42.2384	1.47005	0.0550019	0.942116	No	PREDICTED: uncharacterized protein LOC105172792, partial	Sesamum indicum	NA	NA	NA	NA	NA
TR50917|c0_g1_i1	15.2468	42.2384	1.47005	0.0550019	0.941197	No	NA	NA	NA	NA	NA	NA	NA
TR23832|c1_g1_i2	145.934	404.019	1.46911	0.0436327	0.883914	No	PREDICTED: uncharacterized protein LOC105158077	Sesamum indicum	NA	NA	NA	NA	NA
TR27308|c0_g1_i1	54.4529	150.589	1.46754	0.0740804	1.01216	No	PREDICTED: uncharacterized protein LOC105168419	Sesamum indicum	NA	NA	NA	NA	NA
TR28352|c1_g1_i6	54.4529	150.589	1.46754	0.0740804	1.01243	No	NA	NA	NA	NA	NA	NA	NA
TR28795|c0_g1_i1	54.4529	150.589	1.46754	0.0740804	1.01269	No	hypothetical protein MIMGU_mgv1a016078mg	Mimulus guttatus	NA	NA	NA	NA	NA
TR10099|c0_g3_i1	93.659	258.939	1.46713	0.0573139	0.952596	No	PREDICTED: vacuolar protein sorting-associated protein 52 A-like	Sesamum indicum	NA	NA	NA	NA	NA
TR38321|c0_g3_i5	93.659	258.939	1.46713	0.0573139	0.952897	No	NA	NA	NA	NA	NA	NA	NA
TR32346|c0_g1_i4	78.4121	216.701	1.46656	0.0632027	0.981122	No	PREDICTED: monoacylglycerol lipase abhd6-B	Sesamum indicum	NA	NA	NA	NA	NA
TR39197|c0_g1_i1	39.2061	108.351	1.46656	0.0808272	1.02362	No	PREDICTED: CBS domain-containing protein CBSX5-like	Solanum tuberosum	NA	NA	NA	NA	NA
TR3618|c0_g6_i2	39.2061	108.351	1.46656	0.0808272	1.02289	No	hypothetical protein MIMGU_mgv1a014071mg	Mimulus guttatus	NA	NA	NA	membrane[GO:0016020]	NA
TR44460|c1_g2_i4	39.2061	108.351	1.46656	0.0808272	1.02338	No	PREDICTED: G-type lectin S-receptor-like serine/threonine-protein kinase SD1-1	Erythranthe guttatus	NA	NA	NA	NA	NA
TR42964|c0_g1_i5	39.2061	108.351	1.46656	0.0808272	1.02313	No	NA	NA	NA	NA	NA	NA	NA
TR7966|c0_g1_i5	126.331	348.926	1.46571	0.048439	0.904726	No	NA	NA	NA	NA	NA	NA	NA
TR39143|c1_g1_i2	1084.7	2993.41	1.46449	0.0394504	0.862195	No	alpha-tubulin, partial	Populus fremontii	NA	microtubule-based process[GO:0007017]	structural constituent of cytoskeleton[GO:0005200] ; GTP binding[GO:0005525]	microtubule[GO:0005874]	NA
TR37926|c0_g2_i10	71.8778	198.337	1.46433	0.0665772	0.987521	No	PREDICTED: uncharacterized calcium-binding protein At1g02270	Sesamum indicum	NA	NA	NA	NA	NA
TR30866|c1_g1_i1	47.9185	132.224	1.46433	0.0775458	1.01881	No	PREDICTED: AP2-like ethylene-responsive transcription factor AIL6 isoform X1	Sesamum indicum	NA	NA	NA	NA	NA
TR34563|c0_g3_i1	23.9593	66.1122	1.46433	0.0787783	1.01724	No	hypothetical protein MIMGU_mgv1a005776mg	Mimulus guttatus	NA	carbohydrate metabolic process[GO:0005975]	hydrolase activity, hydrolyzing O-glycosyl compounds[GO:0004553]	NA	NA
TR35691|c0_g7_i2	23.9593	66.1122	1.46433	0.0787783	1.01699	No	NA	NA	NA	NA	NA	NA	NA
TR35729|c0_g1_i4	23.9593	66.1122	1.46433	0.0787783	1.01674	No	hypothetical protein MIMGU_mgv1a009348mg	Mimulus guttatus	NA	phytochromobilin biosynthetic process[GO:0010024] ; oxidation-reduction process[GO:0055114]	cobalt ion binding[GO:0050897] ; oxidoreductase activity, acting on the CH-CH group of donors, iron-sulfur protein as acceptor[GO:0016636]	NA	NA
TR38381|c0_g3_i1	23.9593	66.1122	1.46433	0.0787783	1.01649	No	ZIP metal ion transporter family isoform 1	Theobroma cacao	NA	transmembrane transport[GO:0055085] ; metal ion transport[GO:0030001]	metal ion transmembrane transporter activity[GO:0046873]	integral component of membrane[GO:0016021] ; endoplasmic reticulum[GO:0005783]	NA
TR39972|c2_g3_i2	23.9593	66.1122	1.46433	0.0787783	1.01625	No	NA	NA	NA	NA	NA	NA	NA
TR4111|c1_g4_i3	23.9593	66.1122	1.46433	0.0787783	1.016	No	NA	NA	NA	NA	NA	NA	NA
TR36005|c0_g10_i2	23.9593	66.1122	1.46433	0.0787783	1.01575	No	PREDICTED: glutathione S-transferase 2-like	Sesamum indicum	NA	NA	NA	NA	NA
TR30619|c0_g1_i7	152.468	420.547	1.46376	0.0432514	0.881274	No	PREDICTED: uncharacterized protein LOC105173291	Sesamum indicum	NA	NA	NA	NA	NA
TR7846|c0_g1_i1	137.221	378.309	1.46306	0.0463423	0.898049	No	PREDICTED: beta-amyrin synthase	Sesamum indicum	NA	NA	NA	NA	NA
TR44279|c1_g2_i1	56.631	156.098	1.46279	0.0741085	1.01228	No	PREDICTED: AP-4 complex subunit epsilon	Sesamum indicum	NA	NA	NA	NA	NA
TR31635|c0_g1_i3	32.6717	89.9861	1.46166	0.0832205	1.03064	No	PREDICTED: ubiquitin carboxyl-terminal hydrolase 24	Sesamum indicum	NA	NA	NA	NA	NA
TR38890|c0_g6_i1	32.6717	89.9861	1.46166	0.0832205	1.03088	No	PREDICTED: myb family transcription factor APL isoform X4	Sesamum indicum	NA	NA	NA	NA	NA
TR51861|c0_g1_i1	32.6717	89.9861	1.46166	0.0832205	1.03112	No	NA	NA	NA	NA	NA	NA	NA
TR28223|c0_g1_i2	278.799	767.636	1.4612	0.0334622	0.813705	No	hypothetical protein MIMGU_mgv1a012197mg	Mimulus guttatus	NA	metabolic process[GO:0008152] ; carbon utilization[GO:0015976]	zinc ion binding[GO:0008270] ; carbonate dehydratase activity[GO:0004089]	NA	map00910:Nitrogen metabolism(dehydratase[ec:4.2.1.1])
TR32150|c0_g1_i7	148.112	407.692	1.46079	0.0444921	0.889691	No	hypothetical protein POPTR_0004s08350g, partial	Populus trichocarpa	NA	NA	NA	NA	NA
TR37723|c0_g4_i1	74.0559	203.846	1.46079	0.0662579	0.985282	No	PREDICTED: bifunctional L-3-cyanoalanine synthase/cysteine synthase 1, mitochondrial	Sesamum indicum	NA	NA	NA	NA	NA
TR38608|c0_g1_i4	74.0559	203.846	1.46079	0.0662579	0.985839	No	PREDICTED: probable pectinesterase/pectinesterase inhibitor 12	Sesamum indicum	NA	NA	NA	NA	NA
TR33669|c0_g1_i1	74.0559	203.846	1.46079	0.0662579	0.98556	No	hypothetical protein MIMGU_mgv1a009977mg	Mimulus guttatus	NA	NA	NA	NA	NA
TR32762|c0_g1_i1	3953.28	10881	1.46069	0.0984872	1.05866	No	Type I (26 kD) CP29 polypeptide	Solanum lycopersicum	NA	photosynthesis, light harvesting[GO:0009765] ; protein-chromophore linkage[GO:0018298]	metal ion binding[GO:0046872] ; chlorophyll binding[GO:0016168]	photosystem II[GO:0009523] ; integral component of membrane[GO:0016021] ; chloroplast[GO:0009507] ; photosystem I[GO:0009522]	NA
TR41848|c0_g1_i2	115.44	317.706	1.46055	0.0521401	0.921568	No	PREDICTED: U-box domain-containing protein 4-like	Sesamum indicum	NA	NA	NA	NA	NA
TR44436|c2_g3_i3	446.514	1228.59	1.46022	0.0311559	0.792376	No	hypothetical protein LR48_Vigan08g059400	Vigna angularis	NA	NA	NA	NA	NA
TR39326|c0_g2_i11	206.921	569.3	1.46011	0.0374803	0.844725	No	PREDICTED: mitogen-activated protein kinase 3	Sesamum indicum	NA	NA	NA	NA	NA
TR29198|c0_g1_i5	41.3842	113.86	1.46011	0.0813149	1.02708	No	NA	NA	NA	NA	NA	NA	NA
TR39306|c0_g3_i2	41.3842	113.86	1.46011	0.0813149	1.02659	No	PREDICTED: diacylglycerol kinase 5	Sesamum indicum	NA	NA	NA	NA	NA
TR44133|c1_g4_i2	41.3842	113.86	1.46011	0.0813149	1.02684	No	hypothetical protein MIMGU_mgv1a001806mg	Mimulus guttatus	NA	lipid metabolic process[GO:0006629]	glycerophosphodiester phosphodiesterase activity[GO:0008889]	NA	map00564:Glycerophospholipid metabolism(phosphodiesterase[ec:3.1.4.46])
TR3431|c0_g1_i1	50.0967	137.734	1.4591	0.0776471	1.01912	No	PREDICTED: uncharacterized protein LOC105156082	Sesamum indicum	NA	NA	NA	NA	NA
TR40973|c1_g2_i1	435.623	1197.37	1.45871	0.0313354	0.795788	No	PREDICTED: probable metal-nicotianamine transporter YSL7	Sesamum indicum	NA	NA	NA	NA	NA
TR39210|c1_g1_i15	226.524	622.557	1.45854	0.0363112	0.831904	No	putative retroelement pol polyprotein	Arabidopsis thaliana	NA	NA	NA	NA	NA
TR36603|c3_g2_i4	58.8091	161.608	1.45838	0.07402	1.01212	No	NA	NA	NA	NA	NA	NA	NA
TR43412|c0_g1_i10	1337.36	3672.9	1.45753	0.0452207	0.895085	No	PREDICTED: phosphomethylpyrimidine synthase, chloroplastic isoform X2	Sesamum indicum	NA	NA	NA	NA	NA
TR35084|c0_g1_i3	357.211	980.664	1.45698	0.0321047	0.800657	No	PREDICTED: lysine histidine transporter 1-like	Sesamum indicum	NA	NA	NA	NA	NA
TR32214|c0_g3_i3	178.605	490.332	1.45698	0.0405257	0.868401	No	NA	NA	NA	NA	NA	NA	NA
TR3496|c1_g2_i4	217.812	596.846	1.45428	0.0374537	0.84485	No	PREDICTED: uncharacterized protein LOC105179123	Sesamum indicum	NA	NA	NA	NA	NA
TR37126|c0_g1_i3	60.9872	167.117	1.45428	0.0738354	1.01487	No	PREDICTED: probable isoaspartyl peptidase/L-asparaginase 2-like	Solanum lycopersicum	NA	metabolic process[GO:0008152]	hydrolase activity[GO:0016787]	NA	NA
TR18626|c0_g2_i1	60.9872	167.117	1.45428	0.0738354	1.01514	No	beta-tubulin 6	Oryza sativa Indica Group	NA	microtubule-based process[GO:0007017] ; metabolic process[GO:0008152]	structural constituent of cytoskeleton[GO:0005200] ; GTP binding[GO:0005525] ; GTPase activity[GO:0003924]	microtubule[GO:0005874]	NA
TR2981|c0_g1_i1	52.2748	143.243	1.45428	0.0776895	1.01892	No	hypothetical protein MIMGU_mgv1a013474mg	Mimulus guttatus	NA	NA	NA	NA	NA
TR35453|c0_g2_i7	52.2748	143.243	1.45428	0.0776895	1.01867	No	NA	NA	NA	NA	NA	NA	NA
TR42098|c0_g1_i3	52.2748	143.243	1.45428	0.0776895	1.01917	No	hypothetical protein M569_08822, partial	Genlisea aurea	NA	protein phosphorylation[GO:0006468]	protein kinase activity[GO:0004672] ; ATP binding[GO:0005524]	NA	NA
TR2294|c0_g4_i4	43.5623	119.369	1.45428	0.0816049	1.02779	No	PREDICTED: peptide-N4-(N-acetyl-beta-glucosaminyl)asparagine amidase A-like	Sesamum indicum	NA	NA	NA	NA	NA
TR31506|c0_g1_i3	43.5623	119.369	1.45428	0.0816049	1.02754	No	PREDICTED: uncharacterized protein LOC105166052	Sesamum indicum	NA	NA	NA	NA	NA
TR33027|c0_g1_i1	34.8498	95.4954	1.45428	0.0845608	1.03339	No	NA	NA	NA	NA	NA	NA	NA
TR41978|c0_g4_i4	34.8498	95.4954	1.45428	0.0845608	1.03363	No	PREDICTED: transmembrane 9 superfamily member 3-like	Nicotiana sylvestris	NA	NA	NA	NA	NA
TR34049|c1_g3_i1	26.1374	71.6216	1.45428	0.0824608	1.02897	No	PREDICTED: uncharacterized protein LOC105109051	Populus euphratica	NA	NA	NA	NA	NA
TR30997|c0_g6_i1	26.1374	71.6216	1.45428	0.0824608	1.02873	No	PREDICTED: probable WRKY transcription factor 40	Sesamum indicum	NA	NA	NA	NA	NA
TR31345|c0_g2_i1	26.1374	71.6216	1.45428	0.0824608	1.02849	No	hypothetical protein MIMGU_mgv1a015976mg	Mimulus guttatus	NA	NA	calcium ion binding[GO:0005509]	NA	NA
TR2349|c0_g1_i1	17.4249	47.7477	1.45428	0.0666474	0.986063	No	PREDICTED: peroxisomal membrane protein PMP22-like	Fragaria vesca subsp. vesca	NA	NA	NA	NA	NA
TR30200|c0_g1_i5	17.4249	47.7477	1.45428	0.0666474	0.986895	No	cytochrome P450 CYP51G1	Salvia miltiorrhiza	NA	oxidation-reduction process[GO:0055114]	heme binding[GO:0020037] ; oxidoreductase activity, acting on paired donors, with incorporation or reduction of molecular oxygen[GO:0016705] ; monooxygenase activity[GO:0004497] ; iron ion binding[GO:0005506]	integral component of membrane[GO:0016021]	NA
TR43613|c1_g2_i6	17.4249	47.7477	1.45428	0.0666474	0.98745	No	hypothetical protein MIMGU_mgv1a002427mg	Mimulus guttatus	NA	fatty acid beta-oxidation[GO:0006635]	flavin adenine dinucleotide binding[GO:0050660] ; acyl-CoA dehydrogenase activity[GO:0003995] ; acyl-CoA oxidase activity[GO:0003997]	peroxisome[GO:0005777]	map00071:Fatty acid degradation(oxidase[ec:1.3.3.6]) ; map01040:Biosynthesis of unsaturated fatty acids(oxidase[ec:1.3.3.6]) ; map00592:alpha-Linolenic acid metabolism(oxidase[ec:1.3.3.6])
TR7972|c2_g5_i7	17.4249	47.7477	1.45428	0.0666474	0.987728	No	hypothetical protein MIMGU_mgv1a013714mg	Mimulus guttatus	NA	NA	binding[GO:0005488]	NA	NA
TR29367|c0_g1_i8	17.4249	47.7477	1.45428	0.0666474	0.98634	No	hypothetical protein MIMGU_mgv1a005775mg	Mimulus guttatus	NA	NA	NA	NA	NA
TR32974|c0_g1_i1	17.4249	47.7477	1.45428	0.0666474	0.988006	No	PREDICTED: uncharacterized protein LOC105160600	Sesamum indicum	NA	NA	NA	NA	NA
TR3302|c1_g1_i4	17.4249	47.7477	1.45428	0.0666474	0.985786	No	PREDICTED: protein vip1-like	Sesamum indicum	NA	NA	NA	NA	NA
TR33250|c0_g2_i1	17.4249	47.7477	1.45428	0.0666474	0.986618	No	PREDICTED: NADPH-dependent 1-acyldihydroxyacetone phosphate reductase-like	Sesamum indicum	NA	NA	NA	NA	NA
TR36816|c1_g2_i2	17.4249	47.7477	1.45428	0.0666474	0.987173	No	hypothetical protein MIMGU_mgv1a012091mg	Mimulus guttatus	NA	iron-sulfur cluster assembly[GO:0016226] ; negative regulation of apoptotic process[GO:0043066]	metal ion binding[GO:0046872] ; electron carrier activity[GO:0009055] ; 2 iron, 2 sulfur cluster binding[GO:0051537]	mitochondrial intermembrane space[GO:0005758]	NA
TR37959|c0_g3_i1	17.4249	47.7477	1.45428	0.0666474	0.988284	No	NA	NA	NA	NA	NA	NA	NA
TR43415|c3_g3_i1	17.4249	47.7477	1.45428	0.0666474	0.98551	No	PREDICTED: gamma-glutamyltranspeptidase 3	Sesamum indicum	NA	NA	NA	NA	NA
TR3794|c1_g2_i16	176.427	482.986	1.45291	0.041362	0.871084	No	hypothetical protein MIMGU_mgv1a0034083mg, partial	Mimulus guttatus	NA	NA	NA	NA	NA
TR32116|c0_g1_i1	320.183	875.987	1.45201	0.0333711	0.812616	No	UGT88A7	Perilla frutescens	Lamiaceae	metabolic process[GO:0008152]	transferase activity, transferring hexosyl groups[GO:0016758]	NA	NA
TR29280|c0_g1_i2	126.331	345.253	1.45045	0.0509781	0.918286	No	hypothetical protein M569_04644, partial	Genlisea aurea	NA	NA	NA	NA	NA
TR29170|c2_g1_i4	3770.32	10302.5	1.45023	0.096822	1.05584	No	NA	NA	NA	NA	NA	NA	NA
TR3126|c0_g1_i2	1524.68	4165.07	1.44983	0.050094	0.912029	No	PREDICTED: CBS domain-containing protein CBSX1, chloroplastic	Sesamum indicum	NA	NA	NA	NA	NA
TR39066|c0_g1_i6	100.193	273.631	1.44945	0.0584818	0.958698	No	galactinol synthase 2	Salvia miltiorrhiza	NA	metabolic process[GO:0008152]	transferase activity, transferring glycosyl groups[GO:0016757]	NA	NA
TR19928|c0_g2_i1	45.7404	124.879	1.44898	0.081746	1.02809	No	PREDICTED: uncharacterized protein LOC101254702 isoform 2	Solanum lycopersicum	NA	NA	NA	NA	NA
TR35183|c1_g1_i1	148.112	404.019	1.44774	0.046542	0.899602	No	PREDICTED: inorganic phosphate transporter 1-4-like	Sesamum indicum	NA	NA	NA	NA	NA
TR31858|c0_g2_i2	37.028	101.005	1.44774	0.0854624	1.02959	No	PREDICTED: DNA-directed RNA polymerase III subunit RPC7-like	Sesamum indicum	NA	NA	NA	NA	NA
TR43655|c1_g8_i1	37.028	101.005	1.44774	0.0854624	1.02936	No	PREDICTED: uncharacterized protein At2g40430	Sesamum indicum	NA	NA	NA	NA	NA
TR13038|c1_g1_i1	37.028	101.005	1.44774	0.0854624	1.02983	No	NA	NA	NA	NA	NA	NA	NA
TR33314|c2_g3_i1	93.659	255.267	1.44652	0.0610877	0.967975	No	PREDICTED: probable CCR4-associated factor 1 homolog 11	Sesamum indicum	NA	NA	NA	NA	NA
TR41898|c1_g5_i1	93.659	255.267	1.44652	0.0610877	0.967684	No	PREDICTED: uncharacterized protein LOC105169481	Sesamum indicum	NA	NA	NA	NA	NA
TR2958|c0_g1_i1	753.628	2053.15	1.44592	0.0358904	0.826217	No	PREDICTED: protein NRT1/ PTR FAMILY 5.2-like	Sesamum indicum	NA	NA	NA	NA	NA
TR2942|c0_g1_i3	28.3155	77.1309	1.44572	0.0853471	1.02962	No	NA	NA	NA	NA	NA	NA	NA
TR36450|c1_g1_i3	28.3155	77.1309	1.44572	0.0853471	1.02985	No	PREDICTED: isoflavone reductase homolog isoform X2	Sesamum indicum	NA	NA	NA	NA	NA
TR19638|c0_g2_i1	28.3155	77.1309	1.44572	0.0853471	1.02891	No	NA	NA	NA	NA	NA	NA	NA
TR26358|c0_g3_i2	28.3155	77.1309	1.44572	0.0853471	1.02915	No	NA	NA	NA	NA	NA	NA	NA
TR3615|c0_g3_i2	28.3155	77.1309	1.44572	0.0853471	1.02938	No	PREDICTED: uncharacterized protein LOC105161859	Sesamum indicum	NA	NA	NA	NA	NA
TR30547|c0_g1_i1	446.514	1215.73	1.44505	0.032883	0.808958	No	hypothetical protein MIMGU_mgv1a016162mg	Mimulus guttatus	NA	NA	NA	NA	NA
TR25502|c0_g3_i1	392.061	1066.98	1.44438	0.0331982	0.81216	No	conserved hypothetical protein	Ricinus communis	NA	NA	NA	NA	NA
TR37003|c1_g8_i3	47.9185	130.388	1.44415	0.081777	1.02652	No	NA	NA	NA	NA	NA	NA	NA
TR31101|c0_g1_i1	165.537	449.93	1.44255	0.0443676	0.892963	No	PREDICTED: fatty acyl-CoA reductase 3-like	Sesamum indicum	NA	NA	NA	NA	NA
TR34087|c0_g2_i2	117.618	319.542	1.4419	0.0547894	0.94431	No	PREDICTED: thioredoxin-like 1-1, chloroplastic	Sesamum indicum	NA	NA	NA	NA	NA
TR42776|c0_g7_i4	98.0152	266.285	1.4419	0.0605323	0.964689	No	PREDICTED: uncharacterized protein LOC105165171	Sesamum indicum	NA	NA	NA	NA	NA
TR3507|c1_g2_i1	58.8091	159.771	1.4419	0.0774432	1.01924	No	beta-tubulin 1	x Doritaenopsis hybrid cultivar	NA	microtubule-based process[GO:0007017] ; metabolic process[GO:0008152]	structural constituent of cytoskeleton[GO:0005200] ; GTP binding[GO:0005525] ; GTPase activity[GO:0003924]	cytoplasm[GO:0005737] ; microtubule[GO:0005874]	NA
TR28332|c0_g2_i1	39.2061	106.514	1.4419	0.0860248	1.03048	No	PREDICTED: E3 ubiquitin-protein ligase At1g63170-like	Sesamum indicum	NA	NA	NA	NA	NA
TR32235|c2_g1_i7	39.2061	106.514	1.4419	0.0860248	1.03071	No	putative ethylene responsive element-DREB	Capsicum annuum	NA	regulation of transcription, DNA-templated[GO:0006355] ; transcription, DNA-templated[GO:0006351]	transcription factor activity, sequence-specific DNA binding[GO:0003700] ; DNA binding[GO:0003677]	nucleus[GO:0005634]	NA
TR37585|c0_g5_i1	19.603	53.2571	1.4419	0.0754219	1.01366	No	PREDICTED: E3 ubiquitin-protein ligase MBR1	Sesamum indicum	NA	NA	NA	NA	NA
TR3837|c1_g2_i6	19.603	53.2571	1.4419	0.0754219	1.01548	No	PREDICTED: uncharacterized protein LOC105179333	Sesamum indicum	NA	NA	NA	NA	NA
TR23978|c0_g1_i1	19.603	53.2571	1.4419	0.0754219	1.01315	No	NA	NA	NA	NA	NA	NA	NA
TR28234|c0_g3_i1	19.603	53.2571	1.4419	0.0754219	1.01418	No	NA	NA	NA	NA	NA	NA	NA
TR35249|c0_g2_i1	19.603	53.2571	1.4419	0.0754219	1.01392	No	PREDICTED: E3 ubiquitin-protein ligase TRAF7-like	Nicotiana sylvestris	NA	NA	NA	NA	NA
TR36979|c0_g1_i1	19.603	53.2571	1.4419	0.0754219	1.01574	No	PREDICTED: uncharacterized protein LOC105171401	Sesamum indicum	NA	NA	NA	NA	NA
TR38606|c0_g3_i3	19.603	53.2571	1.4419	0.0754219	1.0134	No	hypothetical protein MIMGU_mgv1a006560mg	Mimulus guttatus	NA	NA	NA	integral component of membrane[GO:0016021]	NA
TR44208|c1_g1_i2	19.603	53.2571	1.4419	0.0754219	1.01444	No	NA	NA	NA	NA	NA	NA	NA
TR44531|c4_g1_i2	19.603	53.2571	1.4419	0.0754219	1.01289	No	PREDICTED: probably inactive leucine-rich repeat receptor-like protein kinase At2g25790 isoform X3	Vigna radiata var. radiata	NA	NA	NA	NA	NA
TR31171|c2_g5_i1	19.603	53.2571	1.4419	0.0754219	1.01496	No	NA	NA	NA	NA	NA	NA	NA
TR33975|c0_g1_i4	19.603	53.2571	1.4419	0.0754219	1.0147	No	NA	NA	NA	NA	NA	NA	NA
TR8171|c1_g5_i2	19.603	53.2571	1.4419	0.0754219	1.01522	No	hypothetical protein MIMGU_mgv1a008431mg	Mimulus guttatus	NA	NA	NA	NA	NA
TR32463|c1_g1_i2	206.921	561.954	1.44137	0.0400557	0.862539	No	PREDICTED: dof zinc finger protein DOF5.4-like	Sesamum indicum	NA	NA	NA	NA	NA
TR35084|c0_g1_i8	257.018	697.851	1.44105	0.0369212	0.83678	No	NA	NA	NA	NA	NA	NA	NA
TR3950|c0_g1_i2	209.099	567.463	1.44034	0.0400247	0.862224	No	PREDICTED: thiosulfate sulfurtransferase 16, chloroplastic	Sesamum indicum	NA	NA	NA	NA	NA
TR7675|c2_g2_i2	69.6997	189.154	1.44034	0.072457	1.00776	No	PREDICTED: trihelix transcription factor GT-2-like	Sesamum indicum	NA	NA	NA	NA	NA
TR30853|c0_g3_i1	50.0967	135.897	1.43973	0.0817296	1.02813	No	PREDICTED: uncharacterized protein LOC105160689	Sesamum indicum	NA	NA	NA	NA	NA
TR31101|c0_g1_i3	180.784	490.332	1.4395	0.0428291	0.876399	No	PREDICTED: fatty acyl-CoA reductase 3-like	Sesamum indicum	NA	NA	NA	NA	NA
TR33463|c0_g2_i2	60.9872	165.281	1.43834	0.0771649	1.01761	No	hypothetical protein MIMGU_mgv1a014126mg	Mimulus guttatus	NA	small GTPase mediated signal transduction[GO:0007264] ; protein transport[GO:0015031]	GTP binding[GO:0005525]	intracellular[GO:0005622]	NA
TR33297|c0_g8_i1	30.4936	82.6403	1.43834	0.0876872	1.03393	No	PREDICTED: uncharacterized protein At1g47420, mitochondrial	Sesamum indicum	NA	NA	NA	NA	NA
TR36214|c0_g2_i2	30.4936	82.6403	1.43834	0.0876872	1.03347	No	PREDICTED: probable WRKY transcription factor 4	Sesamum indicum	NA	NA	NA	NA	NA
TR41208|c0_g4_i3	30.4936	82.6403	1.43834	0.0876872	1.0337	No	PREDICTED: protein FLX-like 2	Sesamum indicum	NA	NA	NA	NA	NA
TR40323|c0_g1_i2	315.827	855.786	1.43812	0.0351937	0.818044	No	PREDICTED: uncharacterized protein LOC104226710	Nicotiana sylvestris	NA	NA	NA	NA	NA
TR24574|c0_g1_i1	82.7684	224.047	1.43665	0.067176	0.987779	No	PREDICTED: rhodanese-like domain-containing protein 14, chloroplastic	Sesamum indicum	NA	NA	NA	NA	NA
TR36054|c0_g2_i1	41.3842	112.023	1.43665	0.086328	1.03059	No	PREDICTED: uncharacterized protein LOC105161362	Sesamum indicum	NA	NA	NA	NA	NA
TR36872|c0_g1_i2	41.3842	112.023	1.43665	0.086328	1.03083	No	PREDICTED: chaperone protein dnaJ 49-like	Sesamum indicum	NA	NA	NA	NA	NA
TR40836|c0_g2_i5	41.3842	112.023	1.43665	0.086328	1.03036	No	NA	NA	NA	NA	NA	NA	NA
TR34944|c1_g1_i2	291.867	789.674	1.43594	0.0361788	0.83104	No	PREDICTED: uncharacterized protein LOC105178437	Sesamum indicum	NA	NA	NA	NA	NA
TR38407|c1_g1_i1	52.2748	141.407	1.43566	0.0816287	1.0276	No	basic helix-loop-helix transcription factor	Salvia miltiorrhiza	NA	NA	protein dimerization activity[GO:0046983]	NA	NA
TR40973|c0_g1_i1	335.43	907.206	1.43542	0.0350837	0.816206	No	PREDICTED: probable metal-nicotianamine transporter YSL7	Sesamum indicum	NA	NA	NA	NA	NA
TR22805|c0_g1_i3	63.1653	170.79	1.43502	0.0768098	1.01573	No	PREDICTED: uncharacterized protein LOC104599900 isoform X3	Nelumbo nucifera	NA	NA	NA	NA	NA
TR33432|c0_g2_i3	63.1653	170.79	1.43502	0.0768098	1.01598	No	NA	NA	NA	NA	NA	NA	NA
TR7717|c0_g1_i3	378.992	1022.9	1.43243	0.0347771	0.819574	No	PREDICTED: sugar transporter ERD6-like 7	Sesamum indicum	NA	NA	NA	NA	NA
TR42996|c0_g7_i4	98.0152	264.449	1.43191	0.062423	0.977663	No	PREDICTED: copper-transporting ATPase RAN1	Sesamum indicum	NA	NA	NA	NA	NA
TR30834|c1_g1_i1	87.1246	235.066	1.43191	0.0663315	0.985821	No	NA	NA	NA	NA	NA	NA	NA
TR42081|c1_g3_i1	65.3435	176.299	1.43191	0.0763935	1.01302	No	PREDICTED: serine/threonine-protein kinase SRK2A-like	Sesamum indicum	NA	NA	NA	NA	NA
TR42447|c2_g2_i6	54.4529	146.916	1.43191	0.0814948	1.02738	No	hypothetical protein MIMGU_mgv1a013272mg	Mimulus guttatus	NA	NA	NA	NA	NA
TR37821|c0_g4_i3	43.5623	117.533	1.43191	0.0864356	1.03048	No	PREDICTED: armadillo repeat-containing kinesin-like protein 1 isoform X1	Sesamum indicum	NA	NA	NA	NA	NA
TR36964|c2_g11_i1	32.6717	88.1496	1.43191	0.0894074	1.04231	No	PREDICTED: carboxymethylenebutenolidase homolog	Sesamum indicum	NA	NA	NA	NA	NA
TR29518|c0_g1_i5	32.6717	88.1496	1.43191	0.0894074	1.04255	No	PREDICTED: uncharacterized protein LOC104218929	Nicotiana sylvestris	NA	NA	NA	NA	NA
TR15341|c0_g1_i1	21.7812	58.7664	1.43191	0.0818473	1.02642	No	PREDICTED: 4-alpha-glucanotransferase DPE2	Sesamum indicum	NA	NA	NA	NA	NA
TR2514|c0_g1_i1	21.7812	58.7664	1.43191	0.0818473	1.02594	No	NA	NA	NA	NA	NA	NA	NA
TR27009|c0_g1_i1	21.7812	58.7664	1.43191	0.0818473	1.02667	No	hypothetical protein MIMGU_mgv1a012203mg	Mimulus guttatus	NA	nucleosome assembly[GO:0006334]	NA	nucleus[GO:0005634]	NA
TR43264|c0_g6_i4	21.7812	58.7664	1.43191	0.0818473	1.02545	No	PREDICTED: uncharacterized protein LOC105163063 isoform X3	Sesamum indicum	NA	NA	NA	NA	NA
TR29338|c1_g1_i2	21.7812	58.7664	1.43191	0.0818473	1.02691	No	PREDICTED: MYB-like transcription factor ETC3	Sesamum indicum	NA	NA	NA	NA	NA
TR30640|c0_g1_i1	21.7812	58.7664	1.43191	0.0818473	1.02569	No	PREDICTED: cancer-related nucleoside-triphosphatase homolog isoform X1	Sesamum indicum	NA	NA	NA	NA	NA
TR36401|c0_g2_i1	21.7812	58.7664	1.43191	0.0818473	1.02618	No	PREDICTED: uncharacterized protein LOC104225893	Nicotiana sylvestris	NA	NA	NA	NA	NA
TR34476|c0_g1_i1	10.8906	29.3832	1.43191	0.0315944	0.795463	No	PREDICTED: protein TORNADO 2	Populus euphratica	NA	NA	NA	NA	NA
TR3513|c0_g2_i1	10.8906	29.3832	1.43191	0.0315944	0.795083	No	NA	NA	NA	NA	NA	NA	NA
TR23883|c2_g5_i1	10.8906	29.3832	1.43191	0.0315944	0.793945	No	NA	NA	NA	NA	NA	NA	NA
TR40064|c0_g3_i1	10.8906	29.3832	1.43191	0.0315944	0.794324	No	PREDICTED: uncharacterized protein LOC105168601	Sesamum indicum	NA	NA	NA	NA	NA
TR42532|c0_g14_i1	10.8906	29.3832	1.43191	0.0315944	0.795843	No	NA	NA	NA	NA	NA	NA	NA
TR43384|c0_g1_i1	10.8906	29.3832	1.43191	0.0315944	0.794703	No	NA	NA	NA	NA	NA	NA	NA
TR44466|c2_g1_i3	692.641	1865.83	1.42964	0.0369111	0.837271	No	PREDICTED: receptor-like protein kinase HAIKU2	Sesamum indicum	NA	NA	NA	NA	NA
TR42714|c1_g2_i7	67.5216	181.809	1.429	0.0759293	1.01299	No	NA	NA	NA	NA	NA	NA	NA
TR37226|c0_g1_i3	45.7404	123.042	1.42761	0.0863984	1.03027	No	hypothetical protein MIMGU_mgv1a013052mg	Mimulus guttatus	NA	NA	NA	NA	NA
TR31106|c0_g2_i3	45.7404	123.042	1.42761	0.0863984	1.03073	No	NA	NA	NA	NA	NA	NA	NA
TR36031|c3_g3_i11	45.7404	123.042	1.42761	0.0863984	1.0305	No	PREDICTED: uncharacterized protein LOC105158430	Sesamum indicum	NA	NA	NA	NA	NA
TR7858|c0_g2_i1	217.812	585.828	1.4274	0.0411976	0.872154	No	NA	NA	NA	NA	NA	NA	NA
TR34966|c1_g1_i5	378.992	1019.23	1.42724	0.0354264	0.819475	No	hypothetical protein POPTR_0365s00230g	Populus trichocarpa	NA	NA	NA	membrane[GO:0016020]	NA
TR33168|c0_g1_i3	34.8498	93.659	1.42626	0.0905456	1.04449	No	PREDICTED: 7-deoxyloganetic acid glucosyltransferase-like	Sesamum indicum	NA	NA	NA	NA	NA
TR32752|c0_g1_i3	34.8498	93.659	1.42626	0.0905456	1.04494	No	PREDICTED: uncharacterized protein LOC105178335	Sesamum indicum	NA	NA	NA	NA	NA
TR34096|c0_g5_i1	34.8498	93.659	1.42626	0.0905456	1.04472	No	PREDICTED: leucoanthocyanidin dioxygenase-like	Sesamum indicum	NA	NA	NA	NA	NA
TR37300|c1_g1_i1	34.8498	93.659	1.42626	0.0905456	1.04426	No	NA	NA	NA	NA	NA	NA	NA
TR7645|c0_g1_i3	128.509	345.253	1.42579	0.0547345	0.9446	No	PREDICTED: mitogen-activated protein kinase 20-like	Sesamum indicum	NA	NA	NA	NA	NA
TR25010|c0_g1_i1	93.659	251.594	1.42561	0.0651223	0.983387	No	PREDICTED: transcription factor bHLH35	Erythranthe guttatus	NA	NA	NA	NA	NA
TR43453|c1_g2_i2	58.8091	157.935	1.42522	0.0810307	1.02472	No	PREDICTED: MADS-box transcription factor 23-like	Sesamum indicum	NA	NA	NA	NA	NA
TR32910|c0_g1_i1	1254.59	3368.05	1.42469	0.0479003	0.905909	No	cytochrome P450 CYP89A115	Salvia miltiorrhiza	NA	oxidation-reduction process[GO:0055114]	heme binding[GO:0020037] ; oxidoreductase activity, acting on paired donors, with incorporation or reduction of molecular oxygen[GO:0016705] ; monooxygenase activity[GO:0004497] ; iron ion binding[GO:0005506]	NA	NA
TR3531|c0_g1_i2	6235.94	16733.7	1.42408	0.149628	1.10735	No	PREDICTED: low-temperature-induced cysteine proteinase-like	Sesamum indicum	NA	NA	NA	NA	NA
TR41150|c1_g1_i5	95.8371	257.103	1.42369	0.0647421	0.983284	No	hypothetical protein JCGZ_19514	Jatropha curcas	NA	NA	NA	NA	NA
TR33253|c0_g2_i15	47.9185	128.552	1.42369	0.0862569	1.03045	No	PREDICTED: uncharacterized protein At4g08330, chloroplastic isoform X2	Sesamum indicum	NA	NA	NA	NA	NA
TR39021|c1_g1_i2	47.9185	128.552	1.42369	0.0862569	1.03021	No	PREDICTED: probable transcription factor GLK1	Sesamum indicum	NA	NA	NA	NA	NA
TR30989|c1_g2_i2	23.9593	64.2758	1.42369	0.0865321	1.03	No	PREDICTED: 60S ribosomal protein L27a-3-like	Solanum lycopersicum	NA	translation[GO:0006412]	structural constituent of ribosome[GO:0003735]	cytosolic large ribosomal subunit[GO:0022625]	NA
TR38173|c1_g1_i1	23.9593	64.2758	1.42369	0.0865321	1.03046	No	NA	NA	NA	NA	NA	NA	NA
TR39177|c0_g1_i1	23.9593	64.2758	1.42369	0.0865321	1.03023	No	PREDICTED: reticuline oxidase-like protein	Sesamum indicum	NA	NA	NA	NA	NA
TR3481|c1_g1_i1	252.661	677.65	1.42334	0.0395552	0.860202	No	PREDICTED: zinc finger A20 and AN1 domain-containing stress-associated protein 8-like	Sesamum indicum	NA	NA	NA	NA	NA
TR29515|c0_g1_i3	84.9465	227.72	1.42263	0.0691055	0.989091	No	NA	NA	NA	NA	NA	NA	NA
TR36789|c1_g1_i2	135.043	361.781	1.42169	0.0538182	0.93584	No	PREDICTED: cytochrome P450 CYP72A219-like	Sesamum indicum	NA	NA	NA	NA	NA
TR43028|c0_g2_i2	74.0559	198.337	1.42126	0.0743541	1.01432	No	hypothetical protein MIMGU_mgv1a004207mg	Mimulus guttatus	NA	NA	NA	NA	NA
TR43627|c0_g12_i2	37.028	99.1683	1.42126	0.0912355	1.0424	No	PREDICTED: probable methyltransferase PMT14, partial	Camelina sativa	NA	NA	NA	NA	NA
TR37597|c0_g1_i6	137.221	367.29	1.42042	0.0535199	0.933118	No	NA	NA	NA	NA	NA	NA	NA
TR2893|c1_g3_i3	50.0967	134.061	1.4201	0.0860434	1.02976	No	PREDICTED: uncharacterized protein LOC105173891	Sesamum indicum	NA	NA	NA	NA	NA
TR37068|c0_g5_i2	50.0967	134.061	1.4201	0.0860434	1.03047	No	PREDICTED: uncharacterized protein LOC105170375	Sesamum indicum	NA	NA	NA	NA	NA
TR39876|c0_g6_i1	50.0967	134.061	1.4201	0.0860434	1.02953	No	NA	NA	NA	NA	NA	NA	NA
TR29338|c3_g1_i1	50.0967	134.061	1.4201	0.0860434	1.03	No	NA	NA	NA	NA	NA	NA	NA
TR37817|c0_g1_i18	50.0967	134.061	1.4201	0.0860434	1.03023	No	hypothetical protein MIMGU_mgv1a009658mg	Mimulus guttatus	NA	metabolic process[GO:0008152]	catalytic activity[GO:0003824]	NA	NA
TR35239|c0_g1_i1	490.076	1311.23	1.41984	0.0359849	0.826946	No	hypothetical protein MIMGU_mgv1a009493mg	Mimulus guttatus	NA	menaquinone biosynthetic process[GO:0009234]	1,4-dihydroxy-2-naphthoyl-CoA synthase activity[GO:0008935]	NA	map00130:Ubiquinone and other terpenoid-quinone biosynthesis(synthase[ec:4.1.3.36])
TR34509|c0_g1_i4	126.331	337.907	1.41942	0.0564727	0.946381	No	hypothetical protein MIMGU_mgv1a019330mg	Mimulus guttatus	NA	oxidation-reduction process[GO:0055114]	heme binding[GO:0020037] ; oxidoreductase activity, acting on paired donors, with incorporation or reduction of molecular oxygen[GO:0016705] ; monooxygenase activity[GO:0004497] ; iron ion binding[GO:0005506]	integral component of membrane[GO:0016021]	NA
TR7463|c0_g2_i1	63.1653	168.953	1.41942	0.0801943	1.02423	No	hypothetical protein MIMGU_mgv1a019221mg	Mimulus guttatus	NA	NA	calcium ion binding[GO:0005509]	NA	NA
TR33601|c0_g6_i3	115.44	308.524	1.41824	0.059773	0.960728	No	NA	NA	NA	NA	NA	NA	NA
TR41012|c0_g4_i1	128.509	343.416	1.41809	0.0561362	0.946463	No	hypothetical protein MIMGU_mgv1a003646mg	Mimulus guttatus	NA	protein folding[GO:0006457]	ATP binding[GO:0005524] ; unfolded protein binding[GO:0051082]	NA	NA
TR2167|c0_g1_i1	235.236	628.066	1.4168	0.0415156	0.871182	No	PREDICTED: 6-phosphogluconate dehydrogenase, decarboxylating 3	Sesamum indicum	NA	NA	NA	NA	NA
TR42640|c0_g1_i3	39.2061	104.678	1.4168	0.0915836	1.04321	No	hypothetical protein MIMGU_mgv1a003626mg	Mimulus guttatus	NA	transport[GO:0006810]	transporter activity[GO:0005215]	integral component of membrane[GO:0016021]	NA
TR4059|c0_g4_i3	26.1374	69.7851	1.4168	0.0899793	1.04115	No	PREDICTED: cyclin-B1-2-like	Sesamum indicum	NA	NA	NA	NA	NA
TR26030|c0_g1_i1	26.1374	69.7851	1.4168	0.0899793	1.04137	No	4-hydroxy-3-methylbut-2-enyl diphosphate reductase 2	Salvia miltiorrhiza	NA	dimethylallyl diphosphate biosynthetic process[GO:0050992] ; isopentenyl diphosphate biosynthetic process, methylerythritol 4-phosphate pathway[GO:0019288] ; oxidation-reduction process[GO:0055114]	4-hydroxy-3-methylbut-2-en-1-yl diphosphate reductase activity[GO:0051745] ; metal ion binding[GO:0046872]	NA	NA
TR29680|c0_g1_i2	26.1374	69.7851	1.4168	0.0899793	1.0416	No	hypothetical protein MIMGU_mgv1a015944mg	Mimulus guttatus	NA	NA	NA	integral component of membrane[GO:0016021]	NA
TR39335|c0_g3_i1	26.1374	69.7851	1.4168	0.0899793	1.04183	No	unnamed protein product	Coffea canephora	NA	NA	NA	integral component of membrane[GO:0016021]	NA
TR43453|c2_g8_i1	26.1374	69.7851	1.4168	0.0899793	1.04206	No	NA	NA	NA	NA	NA	NA	NA
TR29388|c0_g1_i1	13.0687	34.8926	1.4168	0.0482452	0.904313	No	NA	NA	NA	NA	NA	NA	NA
TR32798|c0_g12_i1	13.0687	34.8926	1.4168	0.0482452	0.904635	No	PREDICTED: MICOS complex subunit Mic10-like	Sesamum indicum	NA	NA	NA	NA	NA
TR37192|c0_g10_i1	13.0687	34.8926	1.4168	0.0482452	0.904957	No	NA	NA	NA	NA	NA	NA	NA
TR38260|c0_g3_i3	13.0687	34.8926	1.4168	0.0482452	0.905602	No	PREDICTED: uncharacterized protein LOC105156013	Sesamum indicum	NA	NA	NA	NA	NA
TR41958|c0_g4_i1	13.0687	34.8926	1.4168	0.0482452	0.905925	No	unnamed protein product	Coffea canephora	NA	NA	NA	integral component of membrane[GO:0016021]	NA
TR23749|c0_g1_i1	13.0687	34.8926	1.4168	0.0482452	0.903349	No	NA	NA	NA	NA	NA	NA	NA
TR34005|c0_g2_i1	13.0687	34.8926	1.4168	0.0482452	0.903028	No	hypothetical protein MIMGU_mgv1a003364mg	Mimulus guttatus	NA	lysyl-tRNA aminoacylation[GO:0006430]	nucleic acid binding[GO:0003676] ; lysine-tRNA ligase activity[GO:0004824] ; ATP binding[GO:0005524]	cytoplasm[GO:0005737]	map00970:Aminoacyl-tRNA biosynthesis(ligase[ec:6.1.1.6])
TR34407|c0_g3_i1	13.0687	34.8926	1.4168	0.0482452	0.90528	No	hypothetical protein MIMGU_mgv1a010141mg	Mimulus guttatus	NA	metabolic process[GO:0008152]	coenzyme binding[GO:0050662] ; catalytic activity[GO:0003824]	NA	NA
TR37058|c0_g2_i2	13.0687	34.8926	1.4168	0.0482452	0.906248	No	unnamed protein product	Vitis vinifera	NA	NA	NA	NA	NA
TR37358|c0_g1_i1	13.0687	34.8926	1.4168	0.0482452	0.90367	No	hypothetical protein MIMGU_mgv1a006064mg	Mimulus guttatus	NA	NA	transferase activity, transferring glycosyl groups[GO:0016757]	NA	NA
TR42215|c0_g1_i4	13.0687	34.8926	1.4168	0.0482452	0.903992	No	NA	NA	NA	NA	NA	NA	NA
TR2783|c0_g1_i2	472.651	1259.8	1.41435	0.0366366	0.833917	No	PREDICTED: UDP-glycosyltransferase 74F2-like	Sesamum indicum	NA	NA	NA	NA	NA
TR41853|c1_g1_i1	67.5216	179.972	1.41435	0.0791197	1.01816	No	PREDICTED: RNA polymerase sigma factor sigF, chloroplastic isoform X2	Sesamum indicum	NA	NA	NA	NA	NA
TR42741|c0_g1_i2	67.5216	179.972	1.41435	0.0791197	1.0184	No	PREDICTED: pentatricopeptide repeat-containing protein At2g01860	Sesamum indicum	NA	NA	NA	NA	NA
TR2326|c0_g1_i9	54.4529	145.08	1.41376	0.085498	1.02908	No	PREDICTED: uncharacterized protein LOC105177873	Sesamum indicum	NA	NA	NA	NA	NA
TR30657|c0_g3_i2	54.4529	145.08	1.41376	0.085498	1.02932	No	PREDICTED: protein CREG1 isoform X1	Sesamum indicum	NA	NA	NA	NA	NA
TR36964|c2_g10_i2	54.4529	145.08	1.41376	0.085498	1.02885	No	PREDICTED: carboxymethylenebutenolidase homolog	Sesamum indicum	NA	NA	NA	NA	NA
TR37205|c0_g8_i3	54.4529	145.08	1.41376	0.085498	1.02955	No	PREDICTED: vesicle-associated protein 4-2	Sesamum indicum	NA	NA	NA	NA	NA
TR38254|c1_g3_i1	95.8371	255.267	1.41335	0.0668098	0.985422	No	NA	NA	NA	NA	NA	NA	NA
TR37300|c2_g4_i3	357.211	951.281	1.4131	0.0375677	0.843808	No	hypothetical protein MIMGU_mgv1a008741mg	Mimulus guttatus	NA	metabolic process[GO:0008152]	carbon-sulfur lyase activity[GO:0016846]	NA	NA
TR32931|c2_g1_i5	111.084	295.668	1.41233	0.0622151	0.97644	No	hypothetical protein MIMGU_mgv1a024506mg, partial	Mimulus guttatus	NA	NA	NA	NA	NA
TR40403|c0_g2_i6	69.6997	185.481	1.41205	0.0785259	1.01773	No	PREDICTED: glycosylphosphatidylinositol anchor attachment 1 protein	Sesamum indicum	NA	NA	NA	NA	NA
TR33880|c2_g1_i7	69.6997	185.481	1.41205	0.0785259	1.01798	No	PREDICTED: flavonoid 3'-monooxygenase-like isoform X2	Sesamum indicum	NA	NA	NA	NA	NA
TR34782|c0_g1_i5	98.0152	260.776	1.41173	0.0663924	0.985335	No	hypothetical protein MIMGU_mgv1a014561mg	Mimulus guttatus	NA	NA	NA	NA	NA
TR38321|c0_g3_i10	84.9465	225.883	1.41095	0.0715457	1.00196	No	PREDICTED: U11/U12 small nuclear ribonucleoprotein 35 kDa protein	Sesamum indicum	NA	NA	NA	NA	NA
TR39778|c0_g1_i3	84.9465	225.883	1.41095	0.0715457	1.00223	No	PREDICTED: 60S acidic ribosomal protein P1-like	Sesamum indicum	NA	NA	NA	NA	NA
TR44555|c2_g3_i1	56.631	150.589	1.41095	0.0851916	1.02892	No	hypothetical protein MIMGU_mgv1a000811mg	Mimulus guttatus	NA	defense response[GO:0006952]	ADP binding[GO:0043531]	NA	NA
TR2384|c0_g1_i1	28.3155	75.2945	1.41095	0.0925762	1.04772	No	PREDICTED: eukaryotic translation initiation factor 4B-like	Sesamum indicum	NA	NA	NA	NA	NA
TR34005|c0_g5_i1	28.3155	75.2945	1.41095	0.0925762	1.04727	No	hypothetical protein MIMGU_mgv1a003364mg	Mimulus guttatus	NA	lysyl-tRNA aminoacylation[GO:0006430]	nucleic acid binding[GO:0003676] ; lysine-tRNA ligase activity[GO:0004824] ; ATP binding[GO:0005524]	cytoplasm[GO:0005737]	map00970:Aminoacyl-tRNA biosynthesis(ligase[ec:6.1.1.6])
TR37708|c1_g4_i1	28.3155	75.2945	1.41095	0.0925762	1.04749	No	PREDICTED: probable membrane-associated kinase regulator 1	Sesamum indicum	NA	NA	NA	NA	NA
TR43338|c2_g8_i1	28.3155	75.2945	1.41095	0.0925762	1.04704	No	NA	NA	NA	NA	NA	NA	NA
TR43373|c2_g1_i3	28.3155	75.2945	1.41095	0.0925762	1.04794	No	PREDICTED: protein TRANSPORT INHIBITOR RESPONSE 1-like	Nelumbo nucifera	NA	NA	NA	NA	NA
TR29096|c0_g2_i2	185.14	492.169	1.41054	0.0468186	0.898355	No	PREDICTED: uncharacterized protein LOC105960631	Erythranthe guttatus	NA	NA	NA	NA	NA
TR7881|c1_g1_i12	100.193	266.285	1.41019	0.0659917	0.99027	No	PREDICTED: probable receptor-like protein kinase At5g39020, partial	Erythranthe guttatus	NA	NA	NA	NA	NA
TR41451|c2_g1_i2	631.653	1678.52	1.40998	0.0385066	0.854691	No	PREDICTED: uncharacterized protein LOC104239662	Nicotiana sylvestris	NA	NA	NA	NA	NA
TR36283|c0_g11_i1	1052.03	2795.08	1.40971	0.0458535	0.898493	No	NA	NA	NA	NA	NA	NA	NA
TR32931|c2_g1_i6	87.1246	231.393	1.40919	0.0709986	0.999083	No	NA	NA	NA	NA	NA	NA	NA
TR44604|c3_g3_i4	43.5623	115.696	1.40919	0.0915739	1.04355	No	PREDICTED: subtilisin-like protease	Sesamum indicum	NA	NA	NA	NA	NA
TR8068|c1_g3_i2	43.5623	115.696	1.40919	0.0915739	1.04332	No	PREDICTED: uncharacterized protein LOC105168516 isoform X2	Sesamum indicum	NA	NA	NA	NA	NA
TR43183|c2_g6_i5	58.8091	156.098	1.40834	0.0847908	1.03022	No	PREDICTED: F-box/LRR-repeat protein 14	Sesamum indicum	NA	NA	NA	NA	NA
TR31837|c0_g4_i4	74.0559	196.5	1.40784	0.0772743	1.01829	No	PREDICTED: chaperone protein dnaJ 8, chloroplastic	Sesamum indicum	NA	NA	NA	NA	NA
TR4087|c0_g1_i1	104.55	277.304	1.40728	0.0652204	0.983459	No	PREDICTED: cucumber peeling cupredoxin	Sesamum indicum	NA	NA	NA	NA	NA
TR43453|c1_g2_i1	104.55	277.304	1.40728	0.0652204	0.983741	No	PREDICTED: MADS-box transcription factor 23-like	Sesamum indicum	NA	NA	NA	NA	NA
TR35796|c5_g3_i11	60.9872	161.608	1.40592	0.0842981	1.03402	No	NA	NA	NA	NA	NA	NA	NA
TR38361|c0_g2_i1	45.7404	121.206	1.40592	0.0913355	1.04309	No	PREDICTED: omega-6 fatty acid desaturase, endoplasmic reticulum isozyme 2-like, partial	Malus domestica	NA	NA	NA	NA	NA
TR39895|c0_g3_i1	45.7404	121.206	1.40592	0.0913355	1.04286	No	PREDICTED: uncharacterized oxidoreductase At1g06690, chloroplastic	Erythranthe guttatus	NA	NA	NA	NA	NA
TR8298|c1_g1_i2	30.4936	80.8038	1.40592	0.0946121	1.05244	No	PREDICTED: protein MEI2-like 2	Sesamum indicum	NA	NA	NA	NA	NA
TR27298|c0_g3_i1	30.4936	80.8038	1.40592	0.0946121	1.05333	No	NA	NA	NA	NA	NA	NA	NA
TR28662|c0_g1_i1	30.4936	80.8038	1.40592	0.0946121	1.05378	No	hypothetical protein MIMGU_mgv1a020357mg	Mimulus guttatus	NA	NA	NA	NA	NA
TR40150|c0_g1_i4	30.4936	80.8038	1.40592	0.0946121	1.05266	No	NA	NA	NA	NA	NA	NA	NA
TR43410|c0_g3_i1	30.4936	80.8038	1.40592	0.0946121	1.05289	No	hypothetical protein MIMGU_mgv1a001202mg	Mimulus guttatus	NA	NA	NA	NA	NA
TR44354|c4_g1_i2	30.4936	80.8038	1.40592	0.0946121	1.05311	No	hypothetical protein MIMGU_mgv1a001283mg	Mimulus guttatus	NA	NA	NA	NA	NA
TR7419|c2_g1_i1	30.4936	80.8038	1.40592	0.0946121	1.05355	No	NA	NA	NA	NA	NA	NA	NA
TR2051|c0_g1_i1	15.2468	40.4019	1.40592	0.0631493	0.984356	No	PREDICTED: uncharacterized protein LOC105956412 isoform X1	Erythranthe guttatus	NA	NA	NA	NA	NA
TR33941|c0_g1_i2	15.2468	40.4019	1.40592	0.0631493	0.98523	No	hypothetical protein MIMGU_mgv1a001105mg	Mimulus guttatus	NA	NA	NA	NA	NA
TR34308|c0_g1_i1	15.2468	40.4019	1.40592	0.0631493	0.983192	No	hypothetical protein MIMGU_mgv1a006743mg	Mimulus guttatus	NA	protein phosphorylation[GO:0006468] ; signal transduction[GO:0007165]	ATP binding[GO:0005524] ; protein serine/threonine kinase activity[GO:0004674]	NA	NA
TR41664|c1_g3_i1	15.2468	40.4019	1.40592	0.0631493	0.982611	No	PREDICTED: glucose-6-phosphate 1-dehydrogenase, cytoplasmic isoform-like	Sesamum indicum	NA	NA	NA	NA	NA
TR22621|c1_g1_i2	15.2468	40.4019	1.40592	0.0631493	0.981162	No	PREDICTED: probably inactive leucine-rich repeat receptor-like protein kinase At3g28040	Sesamum indicum	NA	NA	NA	NA	NA
TR28718|c0_g1_i2	15.2468	40.4019	1.40592	0.0631493	0.981451	No	NA	NA	NA	NA	NA	NA	NA
TR3005|c0_g1_i9	15.2468	40.4019	1.40592	0.0631493	0.982031	No	PREDICTED: homeobox-leucine zipper protein HAT5	Sesamum indicum	NA	NA	NA	NA	NA
TR32454|c1_g4_i1	15.2468	40.4019	1.40592	0.0631493	0.981741	No	PREDICTED: probable DEAD-box ATP-dependent RNA helicase 48	Phoenix dactylifera	NA	NA	NA	NA	NA
TR36104|c0_g1_i1	15.2468	40.4019	1.40592	0.0631493	0.983773	No	PREDICTED: ABC transporter B family member 19	Sesamum indicum	NA	NA	NA	NA	NA
TR37864|c0_g3_i2	15.2468	40.4019	1.40592	0.0631493	0.984647	No	PREDICTED: probable mitochondrial import inner membrane translocase subunit TIM21	Sesamum indicum	NA	NA	NA	NA	NA
TR38867|c0_g2_i9	15.2468	40.4019	1.40592	0.0631493	0.983483	No	PREDICTED: uncharacterized protein LOC105958544 isoform X2	Erythranthe guttatus	NA	NA	NA	NA	NA
TR42246|c0_g6_i1	15.2468	40.4019	1.40592	0.0631493	0.984939	No	PREDICTED: MAP7 domain-containing protein 1	Sesamum indicum	NA	NA	NA	NA	NA
TR21041|c0_g3_i1	15.2468	40.4019	1.40592	0.0631493	0.985522	No	hypothetical protein PRUPE_ppa011677mg	Prunus persica	NA	NA	NA	integral component of membrane[GO:0016021] ; plasma membrane[GO:0005886]	NA
TR29888|c0_g3_i5	15.2468	40.4019	1.40592	0.0631493	0.982321	No	NA	NA	NA	NA	NA	NA	NA
TR38496|c1_g2_i3	15.2468	40.4019	1.40592	0.0631493	0.982901	No	hypothetical protein MIMGU_mgv1a006158mg	Mimulus guttatus	NA	NA	NA	NA	NA
TR38525|c0_g1_i1	15.2468	40.4019	1.40592	0.0631493	0.984065	No	NA	NA	NA	NA	NA	NA	NA
TR31656|c0_g4_i4	919.165	2433.3	1.40452	0.0439949	0.887157	No	PREDICTED: metal transporter Nramp3	Sesamum indicum	NA	NA	NA	NA	NA
TR32702|c0_g3_i7	93.659	247.921	1.40439	0.0694358	0.987913	No	PREDICTED: protein ENHANCED DISEASE RESISTANCE 2-like	Sesamum indicum	NA	NA	NA	NA	NA
TR36791|c3_g1_i2	78.4121	207.519	1.40409	0.0759859	1.01041	No	PREDICTED: putative receptor-like protein kinase At5g39000	Erythranthe guttatus	NA	NA	NA	NA	NA
TR40187|c1_g3_i3	141.577	374.636	1.4039	0.0554823	0.939045	No	PREDICTED: uncharacterized WD repeat-containing protein C2A9.03-like	Sesamum indicum	NA	NA	NA	NA	NA
TR43467|c2_g4_i5	63.1653	167.117	1.40365	0.0837329	1.02924	No	PREDICTED: uncharacterized protein LOC105162500	Sesamum indicum	NA	NA	NA	NA	NA
TR36395|c1_g3_i5	63.1653	167.117	1.40365	0.0837329	1.02948	No	NA	NA	NA	NA	NA	NA	NA
TR35036|c1_g5_i1	95.8371	253.43	1.40293	0.0689467	0.987086	No	hypothetical protein MIMGU_mgv1a004814mg	Mimulus guttatus	NA	NA	NA	NA	NA
TR31781|c0_g5_i1	47.9185	126.715	1.40293	0.0910006	1.0422	No	PREDICTED: uncharacterized protein LOC105161353	Sesamum indicum	NA	NA	NA	NA	NA
TR28092|c0_g1_i2	47.9185	126.715	1.40293	0.0910006	1.04198	No	Uncharacterized protein TCM_034800	Theobroma cacao	NA	NA	NA	NA	NA
TR37679|c0_g2_i1	176.427	466.458	1.40267	0.0492171	0.909583	No	PREDICTED: purple acid phosphatase 18-like	Sesamum indicum	NA	NA	NA	NA	NA
TR39046|c0_g6_i4	80.5903	213.028	1.40237	0.0753419	1.01857	No	PREDICTED: zinc finger protein CONSTANS-LIKE 13	Sesamum indicum	NA	NA	NA	NA	NA
TR33031|c0_g1_i2	32.6717	86.3132	1.40154	0.0961005	1.05562	No	NA	NA	NA	NA	NA	NA	NA
TR38311|c1_g3_i5	32.6717	86.3132	1.40154	0.0961005	1.05584	No	PREDICTED: putative glucose-6-phosphate 1-epimerase	Sesamum indicum	NA	NA	NA	NA	NA
TR33436|c2_g1_i1	32.6717	86.3132	1.40154	0.0961005	1.05606	No	PREDICTED: G-type lectin S-receptor-like serine/threonine-protein kinase At4g27290	Erythranthe guttatus	NA	NA	NA	NA	NA
TR39324|c2_g6_i6	32.6717	86.3132	1.40154	0.0961005	1.0554	No	NA	NA	NA	NA	NA	NA	NA
TR33116|c0_g2_i3	642.544	1696.88	1.40102	0.0398232	0.860701	No	PREDICTED: peptide methionine sulfoxide reductase A1-like	Sesamum indicum	NA	NA	NA	NA	NA
TR34994|c3_g1_i1	1082.52	2857.52	1.40036	0.0477765	0.904216	No	PREDICTED: amino acid permease 2-like	Sesamum indicum	NA	NA	NA	NA	NA
TR36283|c0_g11_i3	1017.18	2684.89	1.40029	0.0464751	0.898968	No	NA	NA	NA	NA	NA	NA	NA
TR23029|c0_g2_i1	50.0967	132.224	1.4002	0.0906023	1.044	No	PREDICTED: amino acid permease 3-like	Nicotiana sylvestris	NA	NA	NA	NA	NA
TR7729|c1_g1_i4	50.0967	132.224	1.4002	0.0906023	1.04423	No	MYB-related transcription factor	Salvia miltiorrhiza	NA	NA	NA	NA	NA
TR38704|c1_g2_i2	172.071	453.603	1.39843	0.0505744	0.915082	No	PREDICTED: calreticulin-3-like	Malus domestica	NA	NA	NA	NA	NA
TR34419|c0_g4_i1	104.55	275.468	1.3977	0.0671622	0.987853	No	PREDICTED: BI1-like protein	Sesamum indicum	NA	NA	NA	NA	NA
TR34973|c1_g1_i1	69.6997	183.645	1.3977	0.0817545	1.02795	No	PREDICTED: uncharacterized protein LOC105175213	Sesamum indicum	NA	NA	NA	NA	NA
TR23034|c0_g1_i1	34.8498	91.8225	1.3977	0.0969927	1.05683	No	conserved hypothetical protein	Ricinus communis	NA	NA	NA	NA	NA
TR33107|c0_g3_i1	34.8498	91.8225	1.3977	0.0969927	1.05727	No	PREDICTED: N-acetyltransferase 9-like protein isoform X1	Sesamum indicum	NA	NA	NA	NA	NA
TR38315|c0_g3_i2	34.8498	91.8225	1.3977	0.0969927	1.05661	No	PREDICTED: optic atrophy 3 protein homolog	Sesamum indicum	NA	NA	NA	NA	NA
TR42734|c2_g3_i4	34.8498	91.8225	1.3977	0.0969927	1.05639	No	PREDICTED: putative BPI/LBP family protein At1g04970	Sesamum indicum	NA	NA	NA	NA	NA
TR7698|c0_g1_i5	34.8498	91.8225	1.3977	0.0969927	1.05705	No	PREDICTED: uncharacterized protein LOC105161097	Sesamum indicum	NA	NA	NA	NA	NA
TR38613|c0_g4_i1	17.4249	45.9113	1.3977	0.0753625	1.01832	No	NA	NA	NA	NA	NA	NA	NA
TR42017|c1_g6_i1	17.4249	45.9113	1.3977	0.0753625	1.0178	No	PREDICTED: 3-ketoacyl-CoA synthase 12-like, partial	Sesamum indicum	NA	NA	NA	NA	NA
TR20679|c0_g1_i2	17.4249	45.9113	1.3977	0.0753625	1.01676	No	PREDICTED: serine/threonine-protein kinase D6PKL1-like	Sesamum indicum	NA	NA	NA	NA	NA
TR38053|c3_g10_i18	17.4249	45.9113	1.3977	0.0753625	1.01572	No	PREDICTED: uncharacterized protein LOC105178474 isoform X2	Sesamum indicum	NA	NA	NA	NA	NA
TR39136|c0_g2_i1	17.4249	45.9113	1.3977	0.0753625	1.01598	No	hypothetical protein MIMGU_mgv1a009098mg	Mimulus guttatus	NA	NA	NA	NA	NA
TR43265|c0_g1_i1	17.4249	45.9113	1.3977	0.0753625	1.01702	No	PREDICTED: uncharacterized protein LOC105170871	Sesamum indicum	NA	NA	NA	NA	NA
TR43270|c0_g5_i2	17.4249	45.9113	1.3977	0.0753625	1.01754	No	Copper amine oxidase family protein	Theobroma cacao	NA	oxidation-reduction process[GO:0055114] ; amine metabolic process[GO:0009308]	copper ion binding[GO:0005507] ; quinone binding[GO:0048038] ; primary amine oxidase activity[GO:0008131]	NA	map00260:Glycine, serine and threonine metabolism(oxidase[ec:1.4.3.21]) ; map00350:Tyrosine metabolism(oxidase[ec:1.4.3.21]) ; map00410:beta-Alanine metabolism(oxidase[ec:1.4.3.21]) ; map00950:Isoquinoline alkaloid biosynthesis(oxidase[ec:1.4.3.21]) ; map00360:Phenylalanine metabolism(oxidase[ec:1.4.3.21]) ; map00960:Tropane, piperidine and pyridine alkaloid biosynthesis(oxidase[ec:1.4.3.21])
TR7930|c0_g1_i3	17.4249	45.9113	1.3977	0.0753625	1.01728	No	NA	NA	NA	NA	NA	NA	NA
TR24847|c0_g1_i1	17.4249	45.9113	1.3977	0.0753625	1.01806	No	PREDICTED: protein ELF4-LIKE 4	Sesamum indicum	NA	NA	NA	NA	NA
TR28622|c0_g1_i2	17.4249	45.9113	1.3977	0.0753625	1.01858	No	NA	NA	NA	NA	NA	NA	NA
[truncated: 50,672 more rows]
