# Supplementary material for: Altered Developmental and Metabolic Gene Expression in Basil Interspecific Hybrids
Source: Plants (Basel). 2022 Jul 18;11(14):1873. doi: 10.3390/plants11141873 (PMC9321874; doi:10.3390/plants11141873)
Supplement: Supplementary file 1 [file plants-11-01873-s001.zip › Table S10_DGE_OBP1_vs_Amphid2.XLSX.xlsx]

## Sheet: OB_P1 specific
TrID	OB_P1 readcount
TR10664|c0_g1_i1	20
TR12586|c0_g1_i1	14
TR12658|c0_g1_i1	18
TR12717|c0_g1_i1	20
TR13295|c0_g1_i1	18
TR13421|c0_g1_i1	12
TR13460|c0_g1_i1	18
TR13983|c0_g2_i1	16
TR14036|c0_g1_i1	16
TR14725|c0_g1_i1	24
TR15032|c0_g1_i1	12
TR15275|c0_g1_i1	18
TR15727|c0_g1_i2	22
TR16030|c0_g1_i1	12
TR16374|c0_g1_i1	22
TR17308|c0_g1_i1	20
TR17786|c0_g1_i1	16
TR18073|c0_g1_i1	12
TR18266|c0_g1_i1	32
TR18349|c0_g1_i1	10
TR18350|c0_g1_i2	34
TR1845|c0_g1_i1	16
TR18718|c0_g1_i1	44
TR18744|c0_g1_i1	22
TR18868|c0_g1_i1	32
TR18900|c0_g1_i1	40
TR19153|c0_g1_i1	22
TR19565|c0_g1_i1	48
TR20489|c0_g1_i1	34
TR20757|c0_g2_i1	22
TR20930|c0_g2_i1	24
TR20966|c0_g1_i5	64
TR21216|c0_g2_i1	26
TR21405|c0_g1_i1	22
TR21496|c1_g3_i1	42
TR2161|c0_g3_i1	92
TR2165|c0_g2_i1	10
TR21716|c0_g1_i1	20
TR2176|c0_g1_i6	34
TR21761|c0_g1_i1	14
TR21795|c0_g1_i1	26
TR21831|c0_g1_i1	18
TR21877|c0_g1_i1	28
TR21883|c0_g1_i3	18
TR21941|c0_g1_i2	56
TR22013|c0_g1_i2	16
TR2228|c0_g1_i5	82
TR22284|c0_g1_i1	12
TR22307|c0_g1_i1	22
TR22372|c0_g1_i1	28
TR22528|c0_g1_i1	26
TR22652|c0_g1_i1	22
TR2284|c0_g2_i1	16
TR22867|c0_g1_i1	112
TR22920|c0_g1_i1	12
TR23141|c0_g1_i1	24
TR23160|c0_g1_i3	24
TR23232|c0_g1_i2	34
TR23292|c0_g1_i1	14
TR23305|c0_g1_i1	30
TR23377|c0_g1_i1	26
TR23582|c0_g1_i1	30
TR23670|c0_g1_i4	36
TR23733|c0_g3_i4	22
TR23887|c0_g3_i1	18
TR24035|c1_g2_i3	16
TR24050|c0_g1_i3	46
TR24068|c0_g2_i1	70
TR24069|c1_g1_i1	18
TR24211|c0_g6_i1	68
TR24338|c0_g1_i1	22
TR24505|c0_g1_i1	64
TR2460|c0_g1_i4	28
TR24619|c0_g1_i1	34
TR24636|c0_g1_i1	16
TR24739|c0_g1_i1	62
TR24790|c0_g1_i1	22
TR24810|c0_g1_i1	48
TR24844|c0_g1_i2	46
TR24870|c0_g3_i1	54
TR2489|c0_g3_i1	54
TR24931|c1_g1_i1	24
TR25083|c0_g1_i2	328
TR25122|c0_g1_i1	412
TR2534|c0_g2_i1	88
TR25367|c1_g1_i1	20
TR25520|c0_g2_i1	14
TR2554|c0_g3_i1	46
TR25588|c0_g1_i2	20
TR25698|c0_g1_i1	36
TR25736|c1_g1_i2	20
TR25810|c0_g1_i2	42
TR25951|c1_g2_i1	14
TR25991|c1_g1_i2	52
TR26085|c0_g1_i3	22
TR26100|c0_g2_i2	292
TR26216|c0_g4_i1	202
TR26228|c0_g1_i1	62
TR26275|c0_g1_i1	16
TR26534|c0_g1_i5	156
TR26581|c0_g1_i2	42
TR26617|c0_g1_i2	38
TR2662|c0_g1_i1	42
TR26719|c0_g1_i1	30
TR26766|c1_g1_i2	30
TR26978|c0_g2_i1	32
TR2701|c0_g1_i1	88
TR27091|c0_g2_i5	32
TR27108|c0_g1_i2	34
TR2712|c0_g2_i1	12
TR27164|c0_g1_i1	32
TR27194|c0_g1_i1	42
TR27288|c0_g1_i3	24
TR27303|c0_g1_i1	78
TR27396|c0_g3_i2	22
TR27404|c0_g1_i3	30
TR27695|c1_g1_i1	126
TR27731|c0_g1_i1	110
TR27740|c0_g1_i2	76
TR27743|c0_g1_i1	54
TR27751|c0_g1_i2	30
TR27806|c0_g1_i7	114
TR27848|c0_g3_i1	28
TR2793|c0_g7_i3	220
TR27937|c0_g1_i4	256
TR27941|c0_g2_i1	26
TR2798|c0_g1_i1	60
TR28000|c0_g2_i1	18
TR28049|c2_g1_i1	46
TR28093|c0_g1_i2	60
TR28103|c1_g1_i1	36
TR2812|c0_g1_i1	38
TR28135|c0_g1_i2	62
TR2833|c0_g1_i1	66
TR28338|c0_g2_i1	16
TR28393|c0_g2_i1	94
TR28524|c0_g1_i2	40
TR2856|c0_g1_i3	100
TR28662|c0_g1_i1	88
TR28701|c0_g1_i5	34
TR2872|c0_g2_i1	18
TR28731|c0_g1_i3	34
TR28758|c0_g1_i1	22
TR28790|c0_g1_i3	36
TR2880|c0_g2_i3	26
TR28832|c0_g1_i1	54
TR28832|c0_g1_i2	52
TR28867|c1_g4_i2	28
TR28976|c0_g1_i1	148
TR29027|c1_g1_i2	222
TR29030|c0_g1_i2	70
TR29061|c0_g1_i6	134
TR29079|c0_g1_i1	112
TR29098|c1_g1_i1	38
TR29163|c0_g1_i2	44
TR29181|c2_g1_i11	38
TR29197|c1_g1_i1	64
TR29247|c1_g1_i1	54
TR2925|c1_g2_i2	14
TR29284|c0_g1_i2	114
TR29322|c0_g2_i1	26
TR29338|c3_g6_i3	30
TR29406|c0_g1_i1	26
TR2941|c0_g1_i1	68
TR29510|c0_g1_i1	40
TR29570|c0_g1_i3	18
TR29631|c0_g1_i5	60
TR29681|c0_g1_i5	28
TR29707|c1_g1_i1	48
TR29732|c0_g1_i1	22
TR29760|c1_g1_i3	68
TR29764|c0_g4_i1	20
TR29768|c0_g1_i2	38
TR2978|c0_g1_i3	28
TR29797|c0_g2_i2	30
TR29819|c0_g1_i3	164
TR29849|c0_g1_i1	70
TR29904|c0_g1_i3	28
TR29928|c0_g4_i4	14
TR29933|c0_g1_i1	20
TR29936|c0_g1_i2	34
TR3000|c0_g1_i2	150
TR3001|c3_g3_i1	98
TR30034|c1_g1_i1	36
TR3004|c0_g1_i2	22
TR30050|c0_g5_i1	28
TR30086|c0_g2_i1	34
TR30139|c0_g4_i1	24
TR30140|c1_g3_i1	36
TR30145|c0_g1_i1	16
TR3016|c2_g1_i1	26
TR30184|c0_g1_i2	32
TR30199|c0_g1_i2	28
TR3026|c1_g4_i1	24
TR30265|c0_g3_i1	30
TR30310|c0_g1_i1	34
TR30316|c0_g3_i2	58
TR30454|c0_g2_i2	12
TR30515|c2_g2_i1	18
TR30667|c3_g2_i1	110
TR30697|c0_g3_i1	28
TR30804|c2_g2_i1	22
TR30853|c0_g4_i4	92
TR30859|c0_g2_i4	530
TR30884|c1_g4_i1	42
TR30898|c0_g2_i1	46
TR30950|c0_g5_i1	22
TR30984|c0_g2_i1	34
TR30989|c1_g2_i2	70
TR31072|c0_g1_i1	26
TR31080|c0_g4_i1	34
TR31117|c0_g1_i1	56
TR31119|c0_g2_i4	78
TR31158|c1_g3_i1	42
TR31218|c0_g4_i1	44
TR31218|c0_g9_i4	14
TR31343|c2_g3_i3	106
TR31360|c0_g1_i3	18
TR31410|c0_g3_i1	124
TR31410|c0_g3_i2	132
TR31424|c0_g1_i6	68
TR3144|c0_g2_i1	16
TR31461|c0_g1_i6	132
TR31474|c0_g3_i1	98
TR3153|c0_g2_i8	18
TR31568|c0_g2_i1	18
TR31575|c1_g1_i4	64
TR31665|c0_g1_i7	102
TR31686|c0_g1_i4	66
TR31705|c0_g2_i7	80
TR31761|c2_g8_i4	50
TR31761|c2_g9_i1	28
TR31781|c0_g4_i2	62
TR31800|c0_g1_i1	120
TR31892|c0_g3_i1	10
TR31910|c1_g1_i3	28
TR31928|c0_g2_i1	16
TR31950|c0_g2_i1	26
TR31996|c0_g1_i1	78
TR32079|c0_g1_i1	40
TR32112|c0_g3_i1	26
TR32159|c0_g1_i1	30
TR3219|c0_g1_i4	94
TR32283|c0_g2_i4	52
TR3230|c1_g7_i2	36
TR32326|c0_g2_i4	28
TR32362|c0_g1_i1	20
TR32404|c0_g4_i3	152
TR3247|c1_g4_i2	256
TR32477|c0_g2_i2	206
TR3251|c0_g2_i3	26
TR32544|c0_g1_i3	78
TR32632|c0_g3_i2	16
TR32675|c1_g3_i1	24
TR32714|c1_g4_i1	42
TR32723|c0_g1_i1	44
TR32726|c1_g1_i3	96
TR32729|c0_g1_i1	60
TR32741|c1_g2_i5	308
TR32752|c0_g1_i4	60
TR32772|c0_g1_i2	44
TR32775|c0_g1_i2	60
TR32782|c0_g2_i1	92
TR3281|c0_g5_i2	28
TR32814|c2_g5_i1	10
TR3283|c0_g5_i1	126
TR32849|c1_g1_i1	136
TR32915|c0_g1_i3	34
TR3292|c0_g2_i2	56
TR32927|c0_g1_i1	82
TR32951|c0_g1_i4	52
TR32956|c0_g2_i1	16
TR32977|c0_g6_i3	22
TR32995|c0_g5_i1	60
TR33078|c2_g1_i3	44
TR3308|c0_g1_i2	24
TR33082|c1_g1_i2	152
TR33082|c1_g1_i3	28
TR33082|c1_g1_i5	196
TR33097|c0_g1_i1	16
TR33097|c0_g2_i1	10
TR33134|c0_g1_i3	28
TR3314|c0_g6_i1	30
TR33151|c0_g2_i1	22
TR33160|c0_g3_i5	22
TR33182|c1_g2_i1	12
TR33199|c0_g1_i2	96
TR3323|c0_g1_i4	50
TR33258|c1_g4_i8	132
TR33347|c0_g2_i1	16
TR33348|c0_g1_i3	52
TR33365|c0_g1_i2	62
TR33381|c2_g1_i6	96
TR33397|c0_g4_i1	12
TR33414|c0_g4_i1	38
TR33430|c0_g4_i3	94
TR3346|c1_g3_i3	94
TR33584|c0_g2_i1	76
TR33585|c1_g3_i3	30
TR33590|c0_g1_i3	142
TR33618|c0_g1_i3	34
TR33720|c0_g1_i3	16
TR33736|c0_g2_i8	48
TR33754|c0_g4_i2	26
TR33798|c0_g1_i1	38
TR33802|c0_g3_i3	26
TR33807|c0_g4_i1	32
TR33816|c0_g2_i1	126
TR33858|c0_g1_i1	76
TR33907|c0_g1_i1	14
TR33957|c0_g1_i2	64
TR33966|c1_g3_i1	178
TR33991|c1_g4_i4	86
TR33998|c3_g3_i1	30
TR34008|c0_g1_i1	110
TR34029|c0_g1_i1	12
TR34038|c1_g6_i1	22
TR34058|c0_g1_i2	44
TR34060|c0_g1_i9	86
TR34075|c2_g7_i4	14
TR3408|c0_g1_i6	24
TR34080|c2_g3_i3	34
TR34145|c0_g2_i2	40
TR34146|c0_g1_i3	130
TR34180|c0_g1_i6	34
TR34224|c0_g1_i3	96
TR34227|c0_g1_i3	30
TR34229|c2_g3_i1	26
TR34245|c0_g2_i2	20
TR34274|c0_g1_i3	20
TR34294|c0_g1_i1	566
TR34317|c0_g2_i3	70
TR34391|c0_g1_i5	32
TR34398|c1_g4_i1	152
TR34405|c0_g1_i5	60
TR34411|c0_g4_i1	36
TR3442|c0_g4_i1	34
TR34477|c1_g3_i1	22
TR34490|c0_g1_i3	126
TR34531|c0_g4_i1	14
TR34552|c0_g2_i4	264
TR34553|c1_g2_i1	20
TR3458|c0_g1_i4	164
TR34583|c1_g3_i1	24
TR34658|c5_g1_i2	92
TR34672|c0_g1_i7	14
TR34693|c0_g1_i3	376
TR34708|c0_g1_i1	14
TR34925|c0_g1_i1	32
TR34936|c0_g1_i1	18
TR34971|c0_g2_i1	34
TR34992|c0_g6_i3	38
TR35026|c0_g1_i2	152
TR35074|c1_g1_i6	24
TR35098|c0_g1_i2	34
TR35129|c0_g1_i8	44
TR35160|c3_g3_i1	26
TR35186|c0_g2_i1	80
TR3522|c0_g3_i1	28
TR35229|c1_g2_i3	16
TR3524|c0_g3_i6	14
TR35259|c0_g1_i3	34
TR35259|c0_g2_i1	28
TR35278|c0_g2_i8	22
TR35340|c1_g3_i1	20
TR35362|c0_g6_i1	46
TR35383|c1_g1_i1	38
TR35465|c0_g8_i1	22
TR35491|c1_g1_i1	52
TR35491|c1_g4_i2	108
TR35578|c0_g1_i1	134
TR35592|c0_g7_i2	50
TR35597|c1_g1_i2	468
TR35597|c1_g1_i3	140
TR35605|c0_g1_i4	12
TR35611|c0_g1_i1	14
TR35676|c1_g1_i1	66
TR35677|c0_g1_i1	126
TR35721|c2_g3_i5	26
TR35730|c0_g2_i1	52
TR35739|c0_g1_i7	42
TR3578|c1_g1_i1	42
TR35804|c0_g2_i2	12
TR35873|c0_g7_i1	96
TR35879|c0_g2_i1	44
TR35922|c0_g1_i7	20
TR35929|c0_g3_i4	46
TR35933|c0_g1_i3	68
TR35969|c0_g5_i6	24
TR35978|c0_g4_i1	26
TR3600|c0_g2_i1	144
TR36001|c0_g1_i1	66
TR36001|c0_g3_i4	148
TR36016|c0_g1_i1	112
TR36024|c0_g4_i4	38
TR36034|c0_g4_i4	12
TR36049|c3_g2_i1	70
TR36079|c0_g2_i2	54
TR36110|c0_g1_i1	80
TR36118|c1_g1_i3	36
TR36130|c0_g2_i1	40
TR36150|c1_g3_i1	16
TR36164|c0_g2_i2	40
TR36173|c0_g2_i4	24
TR36177|c0_g2_i4	76
TR3618|c0_g7_i2	62
TR36208|c0_g1_i3	114
TR36216|c2_g1_i4	20
TR36218|c1_g1_i13	100
TR36257|c1_g1_i3	106
TR36261|c1_g2_i1	16
TR36268|c1_g3_i3	76
TR36273|c0_g5_i1	18
TR36325|c0_g1_i1	122
TR36325|c0_g1_i10	100
TR36347|c0_g4_i3	18
TR36357|c0_g6_i2	20
TR36437|c0_g14_i1	26
TR36439|c0_g2_i8	24
TR36452|c0_g1_i1	78
TR36496|c1_g1_i1	42
TR36497|c0_g3_i4	46
TR36502|c1_g2_i1	60
TR36513|c0_g2_i3	162
TR36521|c0_g2_i1	10
TR36538|c0_g1_i2	84
TR3655|c0_g1_i6	38
TR36551|c1_g1_i1	28
TR36560|c1_g4_i1	14
TR36603|c1_g1_i2	150
TR36634|c1_g1_i1	48
TR36643|c1_g5_i5	20
TR36653|c0_g1_i5	94
TR36680|c0_g4_i1	76
TR36680|c0_g6_i1	192
TR36680|c0_g6_i2	122
TR36689|c0_g4_i1	36
TR36771|c1_g2_i10	104
TR36796|c0_g3_i1	50
TR36833|c0_g1_i1	16
TR36878|c0_g1_i8	34
TR36882|c0_g1_i4	32
TR36897|c2_g1_i1	16
TR36919|c0_g1_i5	52
TR36931|c0_g1_i3	88
TR36936|c0_g2_i7	218
TR36960|c0_g1_i2	140
TR36965|c1_g10_i2	20
TR36988|c1_g4_i3	76
TR37011|c0_g6_i5	28
TR37015|c1_g3_i5	26
TR37109|c1_g1_i1	116
TR37122|c0_g3_i7	30
TR37124|c0_g1_i5	82
TR37138|c0_g4_i5	14
TR37173|c0_g1_i2	38
TR37196|c0_g1_i2	16
TR37212|c0_g2_i2	48
TR37213|c0_g9_i1	18
TR37226|c0_g2_i1	12
TR37262|c1_g1_i1	28
TR37270|c0_g1_i9	16
TR37276|c1_g2_i2	48
TR37288|c0_g2_i1	12
TR37299|c0_g1_i1	384
TR37305|c0_g4_i3	90
TR37311|c0_g2_i4	242
TR37335|c0_g1_i3	122
TR37338|c0_g1_i3	104
TR37339|c0_g5_i3	76
TR37358|c0_g1_i1	38
TR37358|c0_g2_i2	218
TR37377|c0_g9_i1	12
TR37421|c0_g1_i2	126
TR37422|c0_g4_i2	32
TR37432|c0_g5_i1	24
TR3744|c0_g6_i1	30
TR3748|c0_g4_i1	16
TR37539|c0_g2_i4	38
TR3756|c1_g4_i1	62
TR37566|c0_g1_i6	66
TR3758|c0_g4_i1	18
TR37603|c1_g1_i4	28
TR37663|c2_g1_i1	40
TR37679|c0_g2_i2	120
TR37697|c0_g7_i2	30
TR37700|c1_g1_i3	24
TR37731|c0_g2_i1	18
TR37736|c0_g5_i2	44
TR37740|c0_g2_i9	18
TR37778|c1_g1_i1	40
TR37786|c1_g7_i1	26
TR3784|c0_g1_i3	98
TR37842|c0_g3_i1	18
TR37877|c0_g2_i2	20
TR37902|c0_g4_i1	30
TR37922|c1_g1_i1	114
TR37932|c0_g9_i1	58
TR37968|c1_g2_i1	20
TR38018|c0_g2_i1	16
TR38020|c0_g1_i1	178
TR38023|c0_g4_i3	212
TR3803|c0_g3_i2	54
TR38032|c0_g1_i10	34
TR38066|c0_g1_i3	86
TR38077|c0_g6_i1	12
TR38099|c1_g1_i11	78
TR38193|c0_g1_i6	14
TR38248|c0_g1_i6	72
TR38307|c0_g1_i4	106
TR38309|c0_g5_i1	38
TR38422|c0_g1_i1	36
TR38429|c0_g1_i2	18
TR38441|c0_g2_i3	28
TR38486|c1_g2_i2	52
TR38523|c0_g1_i1	12
TR3857|c0_g1_i1	46
TR38631|c1_g1_i3	34
TR3864|c0_g1_i5	58
TR38644|c0_g1_i7	34
TR38657|c0_g1_i1	276
TR3869|c0_g2_i1	40
TR38699|c2_g2_i2	26
TR38742|c0_g2_i1	22
TR38759|c0_g2_i5	26
TR38771|c1_g1_i4	16
TR38778|c0_g1_i1	48
TR38779|c0_g3_i7	50
TR38782|c0_g1_i4	48
TR38792|c1_g2_i1	34
TR38813|c0_g6_i1	14
TR38865|c0_g4_i1	50
TR38916|c0_g2_i3	96
TR3893|c0_g1_i1	36
TR38934|c0_g1_i1	154
TR38969|c0_g2_i2	30
TR38987|c0_g1_i2	160
TR39003|c0_g7_i1	18
TR3904|c0_g1_i1	44
TR39046|c0_g1_i1	46
TR39106|c1_g1_i1	18
TR39136|c0_g3_i4	22
TR39174|c0_g4_i3	42
TR39182|c1_g2_i4	20
TR39190|c0_g1_i1	16
TR39203|c1_g2_i2	42
TR39203|c1_g3_i2	26
TR39212|c1_g1_i9	78
TR39253|c0_g1_i1	106
TR39259|c0_g4_i1	38
TR39265|c0_g1_i2	26
TR39311|c0_g3_i1	96
TR39317|c0_g1_i1	20
TR39330|c0_g3_i3	86
TR39349|c0_g2_i2	30
TR39372|c0_g2_i14	62
TR39372|c0_g2_i16	72
TR39373|c1_g1_i6	20
TR39379|c0_g1_i1	42
TR39418|c0_g8_i1	24
TR39435|c1_g2_i2	32
TR39442|c3_g1_i1	24
TR39457|c0_g7_i1	24
TR39458|c0_g3_i3	52
TR39527|c3_g1_i10	162
TR39542|c0_g10_i5	28
TR39562|c2_g5_i1	18
TR39564|c0_g6_i1	16
TR39608|c0_g10_i1	30
TR3961|c0_g1_i2	40
TR39615|c2_g3_i7	58
TR39619|c2_g3_i2	28
TR39631|c0_g1_i1	26
TR39638|c1_g4_i1	34
TR39665|c0_g3_i1	86
TR39669|c0_g2_i1	56
TR39715|c0_g5_i1	30
TR39718|c1_g1_i10	16
TR39724|c0_g1_i4	28
TR39824|c0_g1_i3	116
TR39838|c0_g1_i1	30
TR39844|c1_g1_i1	12
TR3986|c0_g3_i14	44
TR39862|c0_g3_i3	106
TR39920|c0_g10_i3	56
TR39932|c0_g1_i5	30
TR39982|c0_g3_i6	36
TR40012|c0_g4_i1	24
TR40013|c1_g5_i4	50
TR40066|c0_g1_i1	20
TR40066|c0_g6_i2	62
TR40101|c0_g4_i1	26
TR40134|c0_g4_i5	42
TR4019|c1_g12_i1	24
TR40215|c0_g4_i3	54
TR40257|c0_g1_i1	44
TR40285|c0_g4_i2	82
TR40384|c0_g1_i1	268
TR40413|c1_g2_i1	88
TR40413|c1_g5_i1	16
TR40427|c1_g4_i5	2044
TR40437|c0_g1_i2	44
TR40438|c0_g1_i2	46
TR40438|c0_g4_i1	48
TR40456|c0_g5_i1	22
TR40473|c0_g3_i3	36
TR40498|c0_g1_i5	38
TR40521|c0_g2_i9	24
TR40530|c0_g1_i1	70
TR40534|c0_g1_i3	32
TR40548|c0_g1_i5	22
TR4055|c1_g1_i2	34
TR40556|c0_g1_i2	100
TR40572|c0_g1_i1	16
TR40573|c0_g1_i5	30
TR40627|c0_g5_i1	16
TR40644|c2_g2_i1	20
TR40660|c0_g1_i10	106
TR40665|c2_g3_i1	34
TR40689|c0_g1_i3	174
TR40732|c0_g5_i8	90
TR40757|c3_g5_i1	20
TR40777|c4_g13_i6	228
TR40780|c0_g4_i4	38
TR40815|c0_g3_i1	44
TR40816|c2_g5_i2	40
TR40827|c0_g5_i1	46
TR40832|c0_g2_i1	92
TR40848|c0_g1_i5	46
TR40848|c0_g2_i2	100
TR40858|c0_g2_i7	12
TR40883|c0_g1_i2	18
TR40891|c1_g2_i3	52
TR40926|c0_g1_i1	10
TR40939|c2_g9_i1	22
TR40947|c1_g4_i1	24
TR40958|c0_g1_i5	100
TR4096|c0_g3_i1	108
TR40985|c0_g1_i8	30
TR41029|c0_g1_i6	18
TR41039|c0_g5_i1	18
TR41048|c0_g1_i4	62
TR41071|c0_g1_i11	256
TR41149|c0_g7_i3	10
TR41210|c0_g4_i1	22
TR41213|c2_g1_i4	38
TR41254|c0_g3_i2	22
TR41260|c0_g2_i5	22
TR41303|c0_g1_i11	40
TR41303|c0_g1_i5	26
TR41303|c0_g1_i7	42
TR41308|c0_g4_i2	22
TR41317|c0_g1_i2	16
TR41318|c0_g1_i2	78
TR41328|c1_g3_i7	38
TR41380|c0_g6_i1	32
TR41390|c0_g4_i1	14
TR41392|c0_g4_i1	42
TR41401|c0_g6_i1	22
TR41405|c0_g7_i2	28
TR41408|c0_g1_i1	20
TR41409|c2_g1_i1	12
TR41411|c0_g1_i2	132
TR41462|c0_g8_i1	50
TR41475|c0_g1_i4	58
TR41566|c1_g1_i6	90
TR41574|c1_g1_i3	42
TR41595|c1_g5_i1	56
TR41618|c1_g2_i1	24
TR41640|c0_g3_i2	26
TR41651|c2_g3_i2	22
TR41656|c0_g9_i1	10
TR41659|c0_g1_i2	132
TR41704|c0_g1_i1	92
TR41746|c0_g1_i4	254
TR41774|c0_g6_i1	62
TR41803|c0_g1_i2	18
TR41856|c0_g1_i3	16
TR41859|c0_g6_i1	30
TR41866|c1_g1_i1	72
TR41878|c0_g1_i2	160
TR41878|c0_g1_i5	156
TR41887|c0_g1_i1	22
TR41888|c0_g1_i3	106
TR41890|c1_g2_i1	22
TR41894|c0_g1_i1	14
TR41895|c0_g3_i1	76
TR41903|c1_g3_i4	28
TR41906|c0_g1_i3	42
TR41920|c0_g3_i1	40
TR41927|c0_g1_i1	26
TR41955|c1_g1_i1	24
TR41974|c0_g8_i4	66
TR41985|c0_g1_i1	278
TR41988|c0_g1_i7	16
TR41997|c0_g2_i1	26
TR42006|c1_g5_i4	20
TR42013|c1_g2_i4	58
TR42019|c0_g2_i2	14
TR42035|c0_g7_i2	20
TR42039|c0_g1_i2	68
TR42061|c0_g1_i4	26
TR42064|c0_g1_i2	128
TR42083|c0_g7_i1	12
TR42108|c0_g1_i1	12
TR42169|c0_g4_i1	32
TR42176|c0_g1_i1	14
TR42182|c0_g1_i1	14
TR42184|c1_g2_i1	20
TR42272|c0_g3_i1	118
TR42324|c2_g3_i1	32
TR42356|c1_g9_i3	14
TR42359|c0_g4_i1	42
TR42393|c1_g1_i2	20
TR42401|c0_g2_i2	36
TR42407|c0_g7_i2	108
TR42414|c0_g2_i1	40
TR42422|c0_g1_i2	256
TR42435|c1_g2_i19	46
TR42440|c0_g1_i1	82
TR42441|c0_g1_i1	20
TR42442|c1_g1_i1	24
TR42442|c1_g2_i2	16
TR42445|c0_g2_i1	62
TR42512|c0_g3_i3	22
TR42514|c1_g1_i1	78
TR42519|c0_g2_i1	18
TR42524|c1_g2_i7	70
TR42540|c0_g1_i6	30
TR42594|c0_g3_i1	28
TR42610|c2_g9_i1	64
TR42661|c0_g4_i1	40
TR42668|c1_g2_i2	20
TR42682|c0_g1_i3	20
TR42708|c0_g1_i2	64
TR42716|c0_g5_i3	34
TR42717|c0_g4_i1	24
TR42723|c2_g2_i1	38
TR42746|c0_g1_i1	284
TR42749|c1_g3_i4	62
TR42767|c0_g7_i1	20
TR42767|c0_g9_i2	20
TR42803|c0_g1_i4	58
TR42806|c0_g12_i1	20
TR42831|c0_g2_i7	68
TR42832|c0_g1_i1	34
TR42840|c0_g1_i1	96
TR42845|c0_g4_i4	28
TR42849|c0_g4_i1	12
TR42858|c0_g10_i3	20
TR42868|c1_g1_i7	50
TR42874|c0_g1_i3	24
TR42887|c1_g1_i1	8
TR42889|c1_g1_i2	62
TR42919|c0_g1_i3	14
TR42923|c2_g8_i1	38
TR42932|c1_g2_i1	14
TR42941|c0_g1_i1	14
TR42944|c0_g1_i2	34
TR42981|c0_g1_i3	52
TR42982|c0_g2_i1	18
TR42998|c0_g9_i6	14
TR43011|c1_g1_i5	18
TR43038|c0_g1_i3	24
TR43042|c1_g6_i3	16
TR43042|c1_g9_i1	64
TR43071|c0_g2_i5	30
TR43075|c0_g6_i2	116
TR43076|c0_g2_i13	18
TR43078|c0_g1_i3	12
TR43078|c0_g1_i8	20
TR43103|c0_g8_i1	20
TR43103|c0_g9_i1	12
TR43108|c4_g8_i1	26
TR43126|c2_g3_i5	60
TR43190|c1_g1_i3	26
TR43237|c3_g1_i3	16
TR43251|c0_g1_i2	32
TR43275|c0_g1_i1	40
TR43293|c0_g1_i4	62
TR43311|c1_g1_i2	14
TR43313|c0_g1_i1	24
TR43320|c0_g1_i1	22
TR43359|c1_g4_i3	28
TR43371|c2_g1_i1	140
TR43371|c2_g1_i2	36
TR43394|c1_g4_i1	12
TR43406|c1_g1_i5	50
TR43419|c1_g1_i2	22
TR43423|c0_g4_i1	20
TR43465|c1_g4_i1	36
TR43473|c0_g1_i1	36
TR43481|c0_g2_i1	12
TR43595|c1_g4_i3	14
TR43609|c1_g2_i1	42
TR43652|c0_g8_i1	22
TR43654|c0_g7_i1	12
TR43661|c2_g2_i3	30
TR43666|c3_g2_i3	22
TR43683|c2_g2_i1	22
TR43683|c3_g1_i4	34
TR43684|c0_g2_i2	26
TR43718|c0_g1_i3	42
TR43734|c0_g1_i4	352
TR43734|c0_g2_i4	20
TR43737|c0_g1_i2	64
TR43753|c0_g1_i6	176
TR43797|c2_g2_i6	132
TR43800|c2_g8_i5	258
TR43807|c0_g5_i1	30
TR43826|c1_g4_i1	14
TR43828|c0_g1_i4	14
TR43851|c0_g1_i3	70
TR43863|c0_g7_i1	18
TR43907|c1_g1_i8	90
TR43941|c0_g18_i1	18
TR43948|c2_g3_i1	34
TR43964|c0_g9_i7	48
TR43988|c0_g2_i1	30
TR44006|c0_g1_i1	30
TR44006|c0_g2_i1	18
TR44019|c0_g2_i2	16
TR44024|c0_g3_i1	28
TR44034|c3_g1_i3	48
TR44039|c1_g20_i2	18
TR44060|c0_g1_i1	16
TR44060|c0_g5_i3	100
TR44072|c5_g1_i1	150
TR44072|c5_g1_i2	408
TR44081|c3_g4_i1	36
TR44090|c0_g4_i1	18
TR44114|c0_g1_i8	92
TR44127|c1_g3_i1	20
TR44158|c1_g5_i1	16
TR44170|c1_g1_i2	30
TR44184|c3_g1_i3	36
TR44204|c1_g5_i1	30
TR44215|c1_g7_i3	300
TR44230|c0_g1_i1	18
TR44237|c0_g1_i1	16
TR44261|c2_g4_i1	44
TR44281|c0_g4_i1	14
TR44309|c1_g2_i2	74
TR44319|c1_g2_i1	18
TR44325|c0_g3_i2	200
TR44335|c2_g1_i2	94
TR44363|c0_g1_i1	40
TR44363|c0_g2_i1	34
TR44369|c1_g3_i1	30
TR44370|c0_g2_i1	42
TR44370|c0_g3_i1	12
TR44370|c0_g5_i3	14
TR44406|c1_g2_i1	18
TR44419|c1_g1_i5	64
TR44437|c0_g1_i4	108
TR44450|c0_g1_i1	28
TR44461|c1_g2_i3	62
TR44474|c2_g2_i1	12
TR44482|c1_g1_i4	18
TR44533|c2_g1_i4	28
TR44536|c2_g5_i1	18
TR44555|c2_g1_i1	12
TR44555|c2_g3_i5	20
TR44577|c0_g2_i2	146
TR44597|c1_g3_i1	86
TR44608|c0_g1_i2	56
TR44609|c8_g8_i1	78
TR44619|c0_g1_i2	116
TR44624|c1_g3_i1	54
TR44648|c1_g2_i3	116
TR44649|c0_g2_i4	52
TR44658|c1_g1_i3	66
TR44658|c1_g1_i4	72
TR44670|c2_g4_i2	18
TR44675|c2_g1_i3	88
TR44683|c2_g3_i1	24
TR44695|c1_g1_i5	32
TR44695|c1_g2_i3	22
TR44697|c14_g2_i5	46
TR44704|c2_g5_i2	14
TR44714|c1_g1_i1	58
TR44722|c1_g1_i2	144
TR44737|c2_g1_i1	90
TR44746|c2_g1_i2	16
TR44767|c1_g2_i4	24
TR44775|c0_g3_i1	12
TR44785|c0_g1_i2	38
TR44801|c1_g1_i4	22
TR44801|c3_g4_i2	26
TR44802|c0_g2_i2	26
TR44808|c3_g1_i1	18
TR44808|c4_g3_i2	36
TR44808|c4_g3_i3	98
TR44808|c4_g4_i2	18
TR44811|c1_g2_i1	26
TR44816|c0_g1_i1	32
TR44816|c0_g2_i1	74
TR44833|c5_g2_i2	26
TR44834|c3_g3_i1	44
TR44873|c0_g2_i4	110
TR44878|c4_g3_i4	28
TR44882|c0_g2_i5	86
TR6792|c0_g1_i1	14
TR7028|c0_g1_i1	24
TR7045|c0_g1_i1	18
TR7112|c0_g1_i1	24
TR7278|c0_g1_i1	58
TR7281|c0_g1_i4	28
TR7450|c0_g1_i2	60
TR7468|c0_g1_i1	80
TR7498|c0_g1_i2	44
TR7585|c0_g1_i7	120
TR7647|c1_g1_i15	14
TR7647|c1_g2_i4	92
TR7647|c1_g4_i1	24
TR7678|c2_g1_i3	242
TR7681|c0_g1_i1	68
TR7715|c1_g1_i2	22
TR7730|c0_g2_i1	46
TR7748|c2_g1_i1	16
TR7783|c0_g7_i1	16
TR7792|c0_g1_i7	42
TR7804|c0_g2_i1	16
TR7810|c0_g1_i3	102
TR7817|c0_g2_i1	42
TR7901|c0_g1_i3	24
TR7903|c2_g1_i2	44
TR7922|c0_g3_i1	54
TR7928|c0_g3_i1	32
TR7934|c2_g2_i1	76
TR7934|c2_g2_i4	114
TR8027|c1_g1_i9	58
TR8038|c1_g3_i3	18
TR8048|c3_g2_i1	20
TR8064|c0_g3_i3	52
TR8131|c1_g1_i5	18
TR8133|c0_g3_i5	22
TR8148|c1_g2_i3	20
TR8162|c2_g7_i1	28
TR8169|c0_g1_i9	32
TR8178|c2_g7_i1	62
TR8213|c1_g3_i1	78
TR8218|c2_g4_i1	26
TR8230|c2_g2_i6	20
TR8234|c1_g3_i1	122
TR8279|c0_g2_i5	90
TR8308|c1_g1_i2	32
TR10261|c0_g1_i1	74
TR10510|c0_g1_i1	34
TR10646|c0_g2_i1	34
TR10664|c0_g1_i2	14
TR10688|c0_g1_i1	14
TR10829|c0_g1_i1	14
TR10894|c0_g1_i1	24
TR1091|c0_g1_i1	14
TR11150|c0_g1_i1	20
TR11265|c0_g2_i1	18
TR11308|c0_g2_i1	46
TR11525|c0_g1_i1	76
TR11529|c0_g2_i1	20
TR11728|c0_g1_i1	20
TR12093|c0_g2_i1	268
TR12237|c0_g1_i1	134
TR12296|c1_g1_i1	58
TR12307|c0_g1_i1	476
TR12375|c0_g2_i1	104
TR12415|c0_g2_i1	38
TR12721|c0_g1_i1	48
TR12883|c0_g1_i1	104
TR12918|c0_g1_i1	22
TR1303|c0_g1_i1	12
TR1309|c0_g1_i1	90
TR13124|c0_g1_i1	14
TR13225|c0_g1_i1	78
TR13461|c0_g1_i1	18
TR13568|c0_g1_i1	42
TR13632|c0_g1_i1	18
TR13697|c1_g3_i1	46
TR13733|c0_g1_i1	38
TR1378|c0_g1_i1	16
TR13780|c0_g1_i1	28
TR13961|c0_g1_i1	64
TR14004|c0_g1_i1	14
TR14006|c0_g1_i1	98
TR14027|c0_g2_i1	14
TR14316|c0_g1_i1	126
TR14365|c0_g1_i1	16
TR14384|c0_g1_i1	16
TR14496|c0_g1_i1	16
TR146|c0_g2_i1	64
TR14674|c0_g1_i1	36
TR1481|c0_g1_i1	34
TR14845|c0_g1_i1	62
TR14862|c0_g1_i1	22
TR14962|c0_g1_i1	12
TR1500|c0_g1_i1	38
TR1505|c0_g2_i1	32
TR15187|c0_g1_i1	12
TR15229|c0_g1_i2	46
TR1527|c0_g1_i1	22
TR15508|c0_g1_i1	20
TR15662|c0_g1_i1	32
TR15667|c0_g1_i1	54
TR15775|c0_g1_i1	98
TR15806|c0_g1_i1	16
TR15945|c0_g1_i2	26
TR15970|c0_g1_i1	110
TR16124|c0_g1_i1	20
TR16157|c0_g1_i1	30
TR16159|c0_g1_i1	18
TR16326|c0_g3_i1	26
TR16363|c0_g1_i1	66
TR16379|c0_g1_i1	16
TR16584|c0_g1_i1	16
TR16633|c0_g1_i1	12
TR16756|c0_g1_i1	48
TR16771|c0_g1_i1	18
TR16781|c0_g1_i1	30
TR16782|c0_g1_i1	56
TR16782|c0_g1_i3	74
TR16782|c0_g1_i4	80
TR17006|c0_g1_i1	24
TR17050|c0_g1_i1	34
TR1706|c0_g1_i1	48
TR17151|c0_g1_i1	20
TR17198|c0_g2_i1	32
TR17231|c0_g1_i1	18
TR1726|c0_g2_i1	12
TR17272|c0_g2_i1	18
TR17281|c0_g1_i4	14
TR17353|c0_g1_i1	330
TR17414|c0_g1_i1	44
TR17468|c0_g1_i2	12
TR17500|c0_g1_i1	16
TR17605|c0_g1_i1	24
TR17670|c0_g1_i1	24
TR17873|c0_g2_i2	46
TR17940|c0_g1_i1	44
TR17991|c1_g1_i1	12
TR18004|c0_g1_i1	18
TR1803|c0_g1_i1	58
TR18156|c0_g1_i3	86
TR18158|c0_g1_i1	86
TR18252|c0_g1_i1	24
TR18303|c0_g1_i1	18
TR18313|c0_g1_i1	26
TR18315|c0_g1_i1	18
TR1860|c0_g1_i1	28
TR18638|c0_g1_i2	40
TR18662|c0_g2_i1	20
TR18679|c0_g1_i2	44
TR18689|c0_g1_i1	42
TR18770|c0_g1_i1	26
TR18844|c0_g1_i2	20
TR18875|c0_g2_i1	40
TR18892|c0_g2_i1	14
TR19012|c0_g2_i1	20
TR19022|c0_g1_i1	24
TR1907|c1_g1_i1	14
TR19072|c0_g1_i1	14
TR19295|c0_g1_i2	18
TR19702|c0_g2_i1	22
TR19720|c0_g1_i3	42
TR19723|c0_g1_i1	30
TR1978|c0_g2_i1	22
TR19790|c0_g1_i1	22
TR19814|c0_g1_i1	24
TR19853|c0_g1_i1	36
TR19954|c1_g1_i1	40
TR19979|c0_g2_i1	22
TR19997|c0_g2_i1	24
TR20012|c0_g1_i1	14
TR20017|c0_g2_i1	14
TR20052|c1_g1_i2	34
TR20052|c1_g1_i3	136
TR20084|c0_g1_i1	14
TR20103|c0_g1_i1	34
TR20110|c0_g1_i2	24
TR20110|c0_g1_i3	60
TR20136|c0_g2_i1	110
TR20183|c1_g2_i1	38
TR20204|c0_g1_i1	134
TR20261|c0_g2_i1	30
TR20273|c0_g1_i1	56
TR20299|c0_g1_i1	42
TR20321|c0_g1_i1	14
TR20326|c0_g5_i1	14
TR2034|c0_g2_i1	12
TR20361|c0_g1_i2	70
TR20454|c0_g1_i1	34
TR20503|c1_g1_i1	16
TR20524|c0_g1_i1	18
TR20543|c0_g1_i1	56
TR20553|c0_g1_i2	16
TR206|c0_g1_i1	24
TR20706|c0_g1_i1	18
TR20715|c0_g1_i1	32
TR20748|c0_g1_i1	34
TR20760|c0_g1_i1	20
TR20796|c0_g1_i4	22
TR20805|c0_g1_i1	44
TR20840|c0_g1_i1	24
TR2088|c0_g1_i1	16
TR20889|c0_g1_i1	24
TR20944|c0_g1_i3	24
TR20966|c0_g1_i3	116
TR20969|c0_g1_i3	24
TR20987|c0_g1_i4	16
TR21027|c0_g1_i2	244
TR21041|c0_g3_i1	44
TR21120|c0_g1_i1	70
TR21163|c0_g1_i1	14
TR21202|c0_g1_i1	90
TR21271|c0_g1_i2	30
TR21399|c0_g1_i1	52
TR21458|c0_g1_i1	22
TR2161|c0_g1_i1	32
TR21613|c1_g1_i1	36
TR21634|c1_g1_i1	14
TR2164|c0_g1_i4	102
TR21689|c0_g1_i1	20
TR2172|c0_g1_i1	42
TR21732|c0_g2_i1	18
TR2185|c0_g1_i1	34
TR21859|c0_g1_i1	40
TR21903|c0_g1_i2	22
TR2192|c0_g1_i4	18
TR21936|c0_g1_i1	12
TR21938|c0_g2_i1	28
TR21940|c0_g1_i1	86
TR21941|c0_g1_i1	48
TR21967|c0_g1_i1	14
TR22015|c0_g1_i2	20
TR22022|c0_g1_i1	24
TR22077|c1_g2_i1	40
TR2211|c0_g1_i1	126
TR22132|c0_g2_i1	46
TR22189|c0_g1_i1	70
TR22247|c0_g1_i1	26
TR2227|c3_g3_i5	78
TR2233|c2_g1_i3	42
TR2233|c3_g1_i1	44
TR2233|c3_g4_i1	50
TR22360|c0_g1_i1	38
TR22395|c0_g1_i2	40
TR22396|c0_g3_i1	28
TR2240|c0_g1_i7	128
TR22406|c0_g1_i3	62
TR2241|c0_g1_i2	18
TR22437|c0_g2_i1	20
TR22444|c0_g1_i1	22
TR2247|c0_g1_i2	20
TR22484|c0_g1_i1	24
TR22534|c0_g1_i2	46
TR22544|c0_g1_i2	20
TR22553|c0_g1_i1	38
TR22646|c0_g2_i1	16
TR22648|c0_g1_i1	64
TR22662|c1_g3_i4	128
TR2267|c0_g1_i1	50
TR2267|c0_g1_i2	106
TR22753|c0_g3_i1	12
TR22806|c0_g1_i1	18
TR22821|c0_g1_i4	114
TR22837|c0_g1_i1	24
TR2289|c0_g1_i5	88
TR2289|c0_g1_i6	66
TR22932|c0_g1_i2	24
TR2294|c0_g6_i1	26
TR22962|c0_g1_i7	26
TR22963|c1_g1_i1	64
TR2297|c0_g4_i1	198
TR22980|c0_g2_i1	26
TR22991|c0_g1_i1	20
TR23031|c0_g1_i1	36
TR23031|c0_g1_i2	40
TR2306|c0_g3_i2	62
TR2316|c0_g1_i3	18
TR23171|c0_g1_i1	50
TR23205|c0_g1_i1	58
TR23230|c0_g1_i2	80
TR23254|c0_g5_i1	36
TR23255|c0_g1_i2	20
TR23342|c0_g1_i5	54
TR23364|c0_g1_i1	54
TR23369|c0_g1_i2	24
TR23394|c0_g1_i2	48
TR23414|c0_g1_i1	144
TR23430|c0_g1_i1	98
TR23466|c0_g1_i1	66
TR23472|c0_g1_i3	54
TR2351|c0_g2_i1	16
TR2354|c0_g1_i4	48
TR2355|c0_g1_i1	40
TR2355|c1_g2_i3	96
TR23575|c0_g1_i3	50
TR23587|c0_g1_i1	10
TR23617|c0_g1_i1	186
TR23643|c0_g1_i2	26
TR23643|c0_g1_i3	40
TR23660|c0_g2_i2	22
TR23733|c0_g1_i1	24
TR23749|c0_g2_i1	28
TR23764|c0_g1_i2	26
TR2378|c0_g1_i4	28
TR23837|c0_g1_i1	38
TR2384|c0_g2_i1	44
TR2386|c1_g2_i2	32
TR23870|c0_g1_i3	20
TR23883|c2_g5_i1	32
TR23902|c0_g1_i2	14
TR23918|c0_g1_i2	16
TR23946|c0_g1_i1	22
TR23952|c1_g1_i1	24
TR23977|c0_g1_i1	22
TR23992|c0_g1_i3	280
TR23992|c0_g1_i4	236
TR24049|c0_g1_i1	28
TR24053|c0_g1_i3	22
TR24060|c1_g2_i1	58
TR24092|c0_g1_i3	68
TR24153|c0_g2_i1	22
TR2417|c0_g1_i1	248
TR2417|c0_g1_i5	984
TR24172|c0_g1_i1	52
TR24178|c0_g1_i4	30
TR2418|c0_g2_i3	28
TR24195|c0_g1_i4	46
TR24216|c1_g1_i1	16
TR2422|c3_g3_i2	44
TR24251|c1_g1_i2	36
TR24298|c0_g3_i1	26
TR2432|c1_g3_i4	32
TR2439|c0_g2_i1	42
TR24404|c0_g1_i1	36
TR24412|c1_g2_i1	14
TR24425|c0_g1_i1	106
TR24427|c0_g1_i1	32
TR24539|c0_g2_i2	192
TR24539|c0_g2_i3	188
TR24542|c0_g1_i1	30
TR24574|c0_g1_i1	244
TR24583|c0_g1_i1	1736
TR2460|c0_g1_i1	34
TR2460|c0_g2_i1	82
TR2461|c1_g10_i2	16
TR2466|c0_g1_i2	56
TR24660|c2_g4_i1	34
TR24672|c0_g1_i2	36
TR24675|c0_g1_i1	50
TR24689|c0_g1_i1	38
TR24713|c0_g1_i2	248
TR2474|c0_g1_i1	178
TR2474|c0_g3_i2	52
TR2474|c0_g3_i3	54
TR24760|c0_g3_i1	44
TR2477|c0_g2_i2	28
TR24780|c0_g2_i2	26
TR24797|c0_g2_i1	28
TR24803|c0_g2_i4	44
TR24805|c0_g1_i1	16
TR24806|c0_g1_i1	22
TR24830|c0_g1_i3	74
TR24835|c0_g1_i1	14
TR24847|c0_g1_i1	50
TR24855|c0_g1_i2	12
TR24896|c0_g1_i1	24
TR24907|c1_g1_i3	44
TR24919|c0_g1_i1	32
TR24945|c1_g5_i1	16
TR24983|c0_g1_i4	84
TR24983|c0_g1_i6	102
TR2501|c1_g1_i2	22
TR2503|c0_g1_i1	36
TR2508|c2_g1_i1	34
TR25092|c0_g1_i3	628
TR25100|c0_g1_i1	44
TR25115|c0_g2_i1	66
TR2514|c1_g10_i2	124
TR2515|c0_g3_i1	30
TR25161|c0_g1_i1	20
TR25173|c0_g1_i1	34
TR25174|c0_g1_i1	40
TR25198|c0_g2_i1	12
TR25199|c0_g1_i1	16
TR25200|c0_g1_i2	86
TR25260|c0_g1_i1	26
TR25266|c0_g3_i1	150
TR25308|c0_g1_i1	46
TR25312|c0_g2_i1	36
TR25331|c0_g1_i3	22
TR25359|c0_g1_i2	50
TR25489|c0_g1_i2	72
TR25494|c1_g1_i3	128
TR25538|c0_g1_i1	110
TR25545|c0_g1_i4	50
TR25555|c0_g1_i2	32
TR25579|c0_g1_i3	32
TR25582|c0_g1_i1	40
TR25598|c0_g3_i1	12
TR25634|c0_g1_i1	40
TR2564|c0_g1_i9	14
TR25654|c0_g1_i2	52
TR25679|c0_g3_i2	46
TR2569|c0_g1_i3	34
TR25697|c0_g1_i1	30
TR2570|c0_g1_i11	14
TR25759|c0_g1_i1	38
TR25761|c0_g1_i1	44
TR25800|c0_g1_i1	24
TR25808|c0_g1_i1	46
TR2589|c0_g3_i2	16
TR25905|c0_g1_i1	54
TR25916|c0_g1_i4	14
TR25937|c0_g1_i1	40
TR25937|c0_g1_i2	46
TR25943|c0_g1_i1	24
TR25949|c0_g1_i3	56
TR25951|c0_g1_i1	26
TR25955|c0_g1_i2	48
TR25960|c0_g1_i2	120
TR2597|c0_g4_i2	22
TR25979|c0_g2_i1	16
TR25992|c0_g4_i1	200
TR26055|c0_g2_i1	54
TR26055|c0_g2_i2	50
TR26055|c0_g2_i3	54
TR26070|c0_g1_i2	56
TR26073|c0_g1_i1	78
TR26096|c0_g1_i1	14
TR2610|c0_g5_i1	46
TR26117|c0_g1_i6	28
TR2613|c0_g1_i1	22
TR2613|c0_g2_i1	94
TR26130|c2_g1_i1	22
TR2614|c0_g1_i6	206
TR2616|c0_g1_i3	110
TR26172|c1_g2_i2	48
TR26173|c0_g1_i2	62
TR26196|c0_g1_i1	24
TR26216|c0_g1_i1	382
TR26219|c0_g1_i1	50
TR26237|c0_g1_i6	42
TR26242|c0_g1_i1	94
TR26260|c0_g1_i2	18
TR26276|c0_g2_i3	144
TR26312|c0_g1_i3	34
TR26318|c1_g1_i1	126
TR26323|c0_g1_i1	42
TR26333|c0_g1_i3	64
TR26345|c1_g1_i1	16
TR2635|c0_g1_i1	78
TR2635|c1_g1_i1	112
TR26362|c1_g2_i1	36
TR26404|c0_g1_i5	46
TR26430|c0_g1_i2	14
TR26456|c0_g4_i2	20
TR2650|c1_g3_i2	52
TR2652|c2_g2_i14	114
TR26535|c0_g2_i2	252
TR26535|c0_g2_i3	304
TR26535|c0_g2_i6	198
TR26538|c0_g1_i1	18
TR2658|c0_g1_i3	80
TR26609|c0_g1_i1	28
TR26626|c0_g2_i1	36
TR26628|c0_g1_i5	104
TR2665|c0_g1_i1	54
TR26656|c0_g1_i2	18
TR26678|c0_g3_i1	26
TR26688|c0_g3_i3	40
TR2669|c1_g1_i7	142
TR2669|c2_g5_i2	106
TR2669|c2_g8_i3	176
TR26693|c0_g1_i1	68
TR26696|c0_g3_i1	78
TR26724|c1_g1_i1	104
TR26726|c0_g2_i1	14
TR26736|c0_g1_i2	56
TR26758|c1_g2_i1	52
TR26758|c1_g4_i1	52
TR26773|c0_g1_i1	22
TR26774|c0_g3_i1	32
TR26802|c0_g1_i2	44
TR26806|c0_g2_i7	18
TR2681|c0_g1_i7	72
TR26832|c1_g1_i1	68
TR26832|c2_g1_i2	154
TR2685|c0_g1_i5	104
TR26873|c1_g1_i1	24
TR26879|c0_g1_i1	30
TR26886|c0_g1_i1	28
TR26890|c0_g1_i1	700
TR26890|c0_g1_i2	522
TR26890|c0_g1_i5	28
TR26890|c0_g1_i8	62
TR26890|c0_g1_i9	678
TR2691|c1_g2_i5	46
TR2691|c1_g2_i6	82
TR2694|c1_g2_i6	60
TR26945|c0_g1_i1	88
TR26945|c0_g1_i2	134
TR26945|c0_g1_i4	172
TR2696|c0_g1_i4	46
TR26978|c0_g1_i1	20
TR26989|c1_g1_i1	48
TR26990|c0_g2_i1	14
TR2700|c1_g1_i7	36
TR27009|c0_g3_i3	38
TR27026|c2_g2_i3	36
TR27040|c0_g1_i3	268
TR2705|c0_g1_i1	194
TR27055|c0_g1_i1	264
TR2707|c0_g1_i1	38
TR2707|c0_g3_i2	90
TR27098|c0_g1_i2	44
TR2711|c1_g3_i7	60
TR27118|c0_g3_i1	44
TR27129|c2_g1_i1	58
TR2713|c0_g2_i2	34
TR27141|c0_g3_i2	20
TR27147|c0_g1_i1	48
TR2715|c1_g1_i1	28
TR27156|c0_g1_i1	144
TR27157|c0_g1_i1	26
TR27173|c0_g1_i1	22
TR27174|c0_g1_i3	60
TR27183|c1_g1_i3	24
TR27188|c0_g3_i1	36
TR27234|c0_g1_i1	34
TR27243|c0_g1_i3	164
TR27243|c0_g1_i5	190
TR27258|c0_g2_i4	32
TR27297|c2_g5_i2	26
TR27298|c0_g2_i1	500
TR27311|c0_g1_i1	40
TR27322|c0_g1_i3	26
TR27324|c0_g4_i2	68
TR27336|c0_g3_i1	24
TR27344|c0_g1_i1	106
TR27417|c0_g2_i1	34
TR2745|c0_g5_i1	16
TR27470|c0_g2_i1	34
TR2748|c0_g1_i2	36
TR2753|c3_g1_i1	52
TR2754|c0_g4_i11	44
TR27568|c1_g1_i3	42
TR27596|c0_g1_i1	86
TR27627|c1_g2_i1	20
TR2766|c0_g1_i4	32
TR27687|c0_g1_i1	22
TR27718|c0_g2_i5	14
TR27728|c0_g1_i1	64
TR27730|c0_g1_i1	24
TR27737|c0_g1_i2	62
TR27804|c0_g1_i7	86
TR27806|c0_g1_i10	78
TR2784|c0_g2_i1	26
TR2789|c1_g2_i3	24
TR27899|c0_g1_i2	22
TR27927|c0_g1_i2	32
TR27929|c0_g1_i3	20
TR2793|c0_g4_i9	1832
TR27943|c0_g1_i3	16
TR27948|c0_g1_i1	10
TR2800|c0_g1_i1	22
TR28008|c0_g1_i1	24
TR28027|c1_g1_i8	56
TR2808|c0_g1_i10	62
TR28092|c0_g1_i2	138
TR28112|c0_g1_i1	40
TR2812|c1_g1_i5	158
TR28126|c1_g1_i1	38
TR28126|c2_g1_i3	60
TR28128|c0_g1_i7	44
TR28133|c0_g2_i1	18
TR28167|c0_g1_i2	14
TR2820|c1_g1_i2	14
TR2821|c0_g1_i1	108
TR28217|c0_g1_i1	66
TR28235|c0_g1_i2	80
TR28246|c0_g1_i2	32
TR28250|c0_g1_i3	54
TR28255|c0_g3_i2	44
TR28266|c0_g1_i5	16
TR28266|c0_g1_i6	64
TR28291|c0_g4_i1	18
TR28305|c0_g1_i4	98
TR28319|c0_g1_i3	28
TR28321|c0_g1_i2	28
TR28321|c0_g2_i3	36
TR28337|c0_g1_i1	52
TR28338|c0_g1_i3	34
TR28347|c0_g2_i1	358
TR28365|c0_g1_i4	356
TR28375|c0_g1_i5	36
TR28377|c0_g1_i1	52
TR28379|c0_g1_i2	42
TR28384|c0_g1_i4	34
TR28385|c0_g1_i3	16
TR28385|c0_g1_i8	24
TR28397|c0_g3_i2	22
TR28404|c0_g2_i1	16
TR28421|c0_g1_i4	52
TR28424|c1_g1_i1	52
TR28437|c0_g1_i1	78
TR28445|c0_g1_i1	20
TR28466|c1_g1_i1	64
TR2847|c1_g5_i6	38
TR2850|c1_g1_i1	30
TR28530|c1_g3_i1	12
TR28535|c1_g1_i1	98
TR28556|c0_g1_i6	90
TR2856|c0_g1_i2	32
TR2856|c0_g4_i1	22
TR28598|c0_g2_i1	68
TR28606|c1_g1_i1	16
TR28622|c0_g1_i2	50
TR28622|c1_g2_i1	12
TR28623|c0_g1_i4	50
TR28623|c0_g1_i5	70
TR28631|c0_g1_i2	54
TR28650|c0_g1_i4	52
TR28658|c0_g1_i1	14
TR28661|c0_g1_i1	90
TR28661|c0_g1_i2	28
TR28664|c2_g1_i2	42
TR28677|c1_g1_i1	256
TR28687|c1_g1_i1	58
TR28712|c0_g1_i1	52
TR28713|c0_g3_i2	22
TR28741|c0_g1_i2	42
TR28745|c0_g1_i1	74
TR28752|c0_g1_i1	184
TR28753|c0_g1_i3	56
TR28755|c2_g1_i1	28
TR28755|c2_g1_i5	40
TR2876|c0_g2_i1	182
TR2876|c1_g2_i3	102
TR2876|c1_g2_i5	92
TR2877|c0_g3_i7	52
TR28832|c0_g1_i4	38
TR28852|c0_g1_i3	144
TR28856|c0_g1_i3	74
TR28856|c0_g1_i5	134
TR28860|c0_g1_i4	92
TR28860|c0_g1_i7	64
TR28864|c0_g1_i2	18
TR28880|c0_g3_i2	32
TR28909|c2_g2_i1	36
TR28909|c2_g2_i2	64
TR28916|c0_g1_i1	42
TR28921|c0_g2_i1	42
TR28922|c0_g1_i1	166
TR28928|c4_g8_i3	26
TR28929|c1_g1_i1	88
TR2898|c0_g3_i3	18
TR28980|c0_g1_i2	36
TR28985|c2_g3_i1	34
TR2899|c3_g1_i2	16
TR2899|c3_g2_i3	26
TR29010|c0_g2_i1	30
TR29013|c0_g1_i5	22
TR29017|c1_g1_i2	52
TR29020|c0_g1_i2	60
TR29028|c1_g1_i1	30
TR29033|c0_g2_i2	42
TR29070|c1_g1_i1	110
TR29074|c0_g1_i11	68
TR29076|c0_g1_i2	50
TR29081|c2_g1_i1	20
TR29082|c0_g3_i2	98
TR29102|c0_g1_i4	36
TR29106|c0_g1_i6	26
TR29114|c0_g1_i6	26
TR29174|c0_g1_i1	76
TR29174|c0_g1_i2	24
TR2918|c0_g1_i7	40
TR29183|c0_g6_i1	108
TR29183|c0_g6_i2	52
TR29212|c0_g7_i1	62
TR29219|c0_g1_i5	40
TR29222|c0_g1_i1	18
TR2923|c0_g3_i1	10
TR29238|c1_g1_i1	336
TR29246|c0_g1_i1	78
TR29284|c0_g1_i6	112
TR29297|c9_g3_i2	108
TR29297|c9_g3_i6	160
TR29328|c0_g1_i3	34
TR29329|c0_g4_i1	26
TR29335|c0_g1_i1	34
TR29338|c1_g1_i2	64
TR29338|c3_g1_i1	146
TR29338|c3_g1_i5	150
TR29338|c3_g1_i6	82
TR29338|c3_g4_i1	26
TR2934|c0_g1_i2	36
TR29341|c0_g1_i1	92
TR29341|c0_g1_i4	44
TR29376|c0_g1_i3	82
TR29381|c1_g2_i7	70
TR29381|c1_g2_i8	74
TR29389|c0_g1_i2	14
TR2939|c1_g1_i1	88
TR2939|c1_g1_i2	78
TR2939|c1_g1_i3	86
TR2939|c1_g1_i4	98
TR29392|c0_g1_i1	50
TR29399|c0_g1_i1	72
TR29410|c0_g2_i2	14
TR29470|c0_g1_i1	36
TR29491|c0_g2_i1	24
TR29491|c1_g1_i4	200
TR29491|c1_g1_i5	24
TR29493|c1_g1_i1	60
TR29508|c1_g1_i1	22
TR29518|c0_g1_i4	44
TR29524|c3_g1_i1	18
TR29534|c0_g1_i5	42
TR29554|c1_g2_i1	66
TR29574|c0_g1_i3	108
TR29574|c0_g3_i1	54
TR29585|c0_g1_i3	38
TR29587|c0_g1_i3	96
TR29608|c0_g2_i5	62
TR29620|c0_g1_i3	92
TR2966|c6_g5_i4	28
TR2966|c6_g5_i6	40
TR29662|c0_g1_i1	224
TR2967|c0_g2_i1	18
TR29693|c0_g4_i1	28
TR29694|c0_g2_i5	18
TR29694|c0_g3_i2	24
TR29702|c0_g1_i1	12
TR29702|c0_g2_i1	26
TR29709|c0_g1_i1	40
TR29710|c0_g1_i1	52
TR29778|c0_g2_i1	82
TR29780|c0_g1_i4	114
TR29782|c0_g1_i2	52
TR29788|c0_g1_i1	50
TR29792|c0_g2_i9	22
TR29793|c0_g2_i1	18
TR29820|c0_g1_i2	34
TR29836|c0_g1_i13	166
TR29841|c0_g1_i3	22
TR29853|c0_g2_i1	16
TR29862|c0_g4_i1	48
TR29863|c0_g1_i4	50
TR29866|c0_g1_i5	22
TR29867|c1_g4_i2	20
TR29878|c0_g1_i1	54
TR29883|c0_g1_i1	42
TR29888|c0_g3_i5	44
TR29893|c0_g1_i3	24
TR29921|c0_g1_i1	96
TR2994|c0_g3_i3	112
TR29952|c0_g1_i1	100
TR29962|c0_g1_i3	180
TR29983|c0_g1_i2	74
TR29983|c0_g1_i6	32
TR29999|c2_g3_i2	60
TR3000|c0_g1_i1	146
TR30004|c0_g1_i5	16
TR30011|c0_g1_i7	20
TR30012|c0_g1_i2	26
TR30020|c2_g1_i1	26
TR30051|c0_g2_i1	28
TR30085|c0_g2_i7	26
TR30095|c0_g2_i1	156
TR30103|c0_g1_i4	100
TR30107|c0_g1_i2	108
TR30109|c0_g2_i2	10254
TR30124|c0_g4_i1	38
TR30133|c0_g2_i2	20
TR30146|c2_g4_i1	72
TR30166|c0_g2_i1	14
TR30168|c0_g4_i1	40
TR30173|c0_g2_i1	24
TR30178|c0_g2_i1	12
TR3018|c0_g1_i1	98
TR30180|c0_g2_i7	38
TR30215|c0_g5_i7	34
TR30248|c0_g2_i2	114
TR30254|c1_g1_i2	402
TR30281|c2_g1_i1	56
TR30281|c3_g1_i2	30
TR30290|c0_g2_i1	16
TR30308|c0_g2_i3	72
TR30308|c0_g2_i6	30
TR3031|c3_g1_i1	20
TR30311|c0_g1_i3	18
TR3032|c1_g1_i4	52
TR30327|c0_g1_i1	216
TR30345|c0_g1_i2	16
TR30381|c5_g1_i3	38
TR30389|c0_g2_i1	26
TR30406|c4_g5_i1	144
TR30413|c0_g1_i2	44
TR30447|c0_g1_i8	14
TR30450|c0_g1_i2	136
TR30450|c0_g1_i6	16
TR3048|c0_g1_i2	58
TR3049|c0_g3_i1	12
TR30524|c0_g1_i3	154
TR30524|c0_g1_i4	36
TR30531|c2_g1_i1	54
TR30531|c2_g1_i4	86
TR30531|c2_g2_i1	62
TR30539|c0_g1_i1	44
TR30553|c0_g1_i2	60
TR30562|c0_g1_i1	54
TR30568|c0_g1_i1	16
TR30572|c0_g1_i3	24
TR30573|c0_g1_i3	628
TR30576|c0_g1_i1	26
TR30586|c0_g1_i10	66
TR30586|c0_g1_i11	12
TR30606|c0_g1_i2	22
TR30630|c0_g1_i3	38
TR3064|c0_g1_i1	16
TR3064|c1_g1_i4	48
TR30640|c0_g1_i1	64
TR30644|c0_g1_i1	30
TR30653|c0_g1_i6	40
TR30664|c0_g2_i1	18
TR30667|c3_g1_i1	40
TR30677|c0_g1_i4	36
TR30678|c3_g1_i10	102
TR30678|c3_g1_i8	78
TR30679|c0_g4_i2	30
TR30681|c0_g1_i1	44
TR30687|c0_g1_i5	42
TR30695|c0_g1_i3	46
TR30729|c0_g1_i2	38
TR30738|c0_g1_i5	64
TR30748|c0_g1_i1	60
TR30748|c0_g1_i5	174
TR30750|c0_g1_i1	44
TR30755|c0_g1_i5	30
TR30766|c4_g1_i6	30
TR30807|c2_g1_i3	28
TR30809|c0_g1_i2	58
TR30809|c0_g1_i4	30
TR30814|c0_g1_i2	28
TR30832|c0_g2_i3	14
TR30839|c2_g1_i5	46
TR30846|c0_g1_i1	52
TR30846|c0_g1_i7	52
TR30860|c1_g3_i4	38
TR30884|c1_g1_i1	12
TR30909|c0_g1_i1	64
TR30910|c2_g2_i1	180
TR30918|c2_g1_i5	126
TR30918|c2_g3_i5	66
TR30918|c2_g5_i1	38
TR30923|c0_g3_i2	24
TR30934|c5_g2_i11	42
TR30934|c5_g2_i16	24
TR30934|c5_g3_i1	124
TR30952|c2_g1_i2	24
TR30960|c0_g1_i2	16
TR30974|c0_g2_i5	32
TR30974|c0_g3_i1	12
TR30981|c0_g1_i1	28
TR30985|c0_g1_i1	24
TR30997|c0_g2_i1	170
TR30998|c0_g2_i1	22
TR31008|c0_g1_i1	60
TR31010|c0_g1_i2	90
TR31014|c0_g1_i2	74
TR31016|c1_g1_i1	18
TR31039|c0_g1_i1	62
TR31057|c0_g1_i1	32
TR31069|c0_g2_i1	46
TR3107|c0_g1_i1	116
TR3107|c0_g1_i7	20
TR31096|c0_g1_i1	18
TR31106|c0_g2_i3	134
TR31111|c0_g1_i4	18
TR31112|c0_g3_i3	16
TR31115|c0_g4_i2	454
TR3112|c0_g1_i5	104
TR31124|c0_g1_i1	46
TR31135|c1_g2_i1	12
TR31138|c0_g8_i1	90
TR31170|c0_g1_i2	132
TR31171|c2_g5_i1	58
TR31195|c0_g1_i10	52
TR31195|c0_g1_i9	34
TR31197|c0_g2_i1	442
TR31223|c0_g3_i2	80
TR31231|c0_g1_i1	92
TR31233|c0_g2_i4	22
TR31246|c1_g2_i3	48
TR31248|c1_g4_i1	32
TR31254|c1_g8_i2	196
TR31274|c0_g1_i3	92
TR31279|c0_g1_i3	28
TR31291|c0_g2_i3	10
TR31314|c0_g1_i2	120
TR31330|c3_g3_i1	312
TR3134|c1_g4_i3	30
TR31370|c0_g1_i1	138
TR31380|c1_g1_i5	36
TR31392|c1_g1_i1	12
TR31394|c3_g4_i1	86
TR31399|c0_g2_i4	124
TR3140|c0_g2_i3	174
TR31407|c0_g2_i2	18
TR31407|c0_g2_i4	30
TR31415|c1_g1_i10	32
TR31449|c0_g1_i7	126
TR31455|c0_g1_i10	56
TR31460|c0_g2_i1	14
TR31462|c0_g2_i1	30
TR31464|c0_g1_i5	16
TR31482|c1_g3_i2	418
TR31482|c1_g7_i3	60
TR31487|c0_g1_i1	42
TR31506|c0_g1_i3	130
TR3153|c0_g1_i1	28
TR3155|c0_g2_i8	34
TR31580|c0_g1_i1	76
TR31587|c0_g1_i1	92
TR3159|c0_g2_i1	36
TR31600|c0_g1_i4	16
TR31601|c0_g1_i2	70
TR31601|c0_g3_i2	52
TR31616|c0_g1_i2	52
TR31624|c1_g1_i1	92
TR31636|c0_g4_i1	40
TR31646|c0_g1_i1	46
TR31649|c0_g1_i2	46
TR31663|c1_g2_i4	20
TR31667|c1_g2_i1	36
TR31670|c2_g3_i2	36
TR31675|c0_g1_i1	40
TR31694|c1_g6_i2	34
TR31698|c0_g2_i3	54
TR31717|c0_g1_i1	24
TR31720|c0_g1_i2	30
TR31728|c2_g2_i2	28
TR31737|c1_g1_i1	14
TR31738|c0_g4_i1	14
TR31742|c0_g7_i1	26
TR31757|c0_g2_i3	26
TR31766|c0_g2_i2	32
TR31794|c0_g1_i1	18
TR31794|c1_g1_i2	70
TR31795|c0_g1_i3	42
TR31804|c0_g2_i1	14
TR31810|c0_g5_i2	108
TR31820|c0_g10_i3	38
TR31825|c0_g2_i1	14
TR31854|c0_g1_i2	64
TR31855|c0_g1_i2	24
TR31856|c0_g1_i1	22
TR31885|c1_g3_i1	10
TR31895|c1_g1_i4	36
TR31908|c0_g3_i2	40
TR31919|c0_g1_i3	14
TR31931|c0_g1_i3	34
TR31944|c0_g1_i4	20
TR31944|c0_g1_i6	108
TR31951|c0_g1_i3	58
TR31954|c1_g1_i2	118
TR31954|c1_g3_i2	122
TR31959|c0_g3_i2	32
TR31961|c0_g1_i3	124
TR32008|c0_g3_i1	32
TR32030|c0_g1_i13	142
TR32030|c0_g1_i15	170
TR32043|c3_g10_i1	16
TR32048|c0_g1_i9	18
TR32050|c2_g7_i3	36
TR32080|c2_g1_i1	60
TR32080|c4_g1_i1	80
TR32113|c1_g3_i5	46
TR32128|c1_g2_i2	14
TR32135|c1_g1_i3	44
TR32137|c0_g1_i2	72
TR32140|c0_g2_i1	62
TR32173|c0_g1_i10	30
TR32173|c0_g1_i2	190
TR32173|c0_g1_i4	64
TR32173|c0_g1_i7	20
TR32191|c1_g2_i2	60
TR32199|c0_g2_i4	72
TR3220|c0_g1_i2	30
TR32209|c0_g1_i2	88
TR32237|c2_g2_i2	54
TR32244|c0_g2_i5	98
TR32257|c2_g1_i5	48
TR32259|c2_g1_i3	16
TR3227|c0_g2_i19	76
TR32275|c1_g2_i1	36
TR32285|c0_g1_i1	42
TR32293|c0_g4_i1	20
TR32304|c0_g1_i1	12
TR32305|c0_g2_i1	18
TR32306|c0_g4_i4	22
TR32317|c0_g1_i2	114
TR32321|c1_g2_i1	90
TR32340|c1_g3_i1	136
TR32340|c1_g4_i1	726
TR32363|c0_g1_i8	38
TR32369|c0_g4_i3	124
TR32379|c0_g2_i1	24
TR32383|c1_g1_i13	30
TR32383|c1_g1_i7	26
TR32384|c0_g2_i2	18
TR32384|c0_g3_i1	10
TR32398|c0_g2_i1	52
TR32401|c0_g1_i9	96
TR32404|c0_g4_i10	108
TR32404|c0_g4_i5	16
TR32404|c0_g4_i7	20
TR32404|c0_g4_i9	84
TR3241|c1_g3_i4	538
TR32412|c3_g2_i2	16
TR32420|c0_g1_i1	42
TR32422|c0_g1_i2	50
TR32426|c0_g2_i2	38
TR32431|c1_g1_i4	172
TR32431|c1_g1_i7	216
TR32431|c1_g1_i8	218
TR32431|c1_g1_i9	232
TR32433|c2_g3_i5	24
TR32443|c0_g1_i2	20
TR32454|c1_g5_i3	42
TR32456|c1_g5_i1	78
TR32463|c0_g1_i3	84
TR32464|c1_g3_i1	216
TR3247|c1_g1_i1	28
TR32486|c3_g1_i4	64
TR32489|c1_g1_i1	22
TR32500|c1_g5_i1	34
TR32504|c2_g1_i1	38
TR32511|c4_g2_i3	50
TR32516|c0_g2_i1	30
TR32519|c2_g2_i1	14
TR32522|c0_g2_i1	214
TR32536|c0_g1_i2	40
TR32538|c1_g1_i2	150
TR32540|c0_g1_i1	396
TR32545|c0_g1_i3	264
TR32545|c0_g1_i5	304
TR32547|c1_g1_i6	62
TR32550|c2_g1_i3	58
TR3256|c0_g1_i1	16
TR32564|c1_g5_i1	18
TR32566|c0_g1_i2	10
TR32606|c0_g5_i1	86
TR32612|c1_g1_i11	48
TR32615|c0_g1_i3	114
TR32615|c1_g1_i9	128
TR32623|c0_g1_i3	52
TR32630|c0_g1_i2	62
TR32630|c0_g1_i6	14
TR32634|c0_g1_i2	50
TR32640|c0_g1_i3	86
TR32645|c1_g1_i5	22
TR32675|c1_g5_i3	22
TR32682|c3_g1_i1	56
TR32682|c4_g1_i6	46
TR32685|c1_g1_i1	30
TR32695|c0_g2_i1	18
TR32696|c1_g1_i4	34
TR32696|c1_g1_i5	42
TR32711|c0_g1_i8	30
TR32714|c1_g1_i2	30
TR32726|c1_g1_i1	42
TR32726|c1_g3_i4	38
TR32731|c0_g4_i2	58
TR32738|c0_g2_i2	42
TR32746|c0_g1_i6	16
TR32765|c0_g5_i2	32
TR3277|c3_g1_i8	28
TR32780|c0_g5_i2	38
TR32795|c1_g3_i4	74
TR32796|c0_g1_i2	144
TR32805|c0_g1_i8	32
TR32808|c0_g2_i6	32
TR32819|c0_g1_i2	26
TR32827|c0_g1_i1	12
TR32829|c1_g2_i1	28
TR32839|c0_g3_i1	12
TR32845|c1_g2_i15	48
TR32845|c1_g2_i3	46
TR32845|c1_g2_i8	38
TR32846|c1_g3_i2	42
TR32846|c1_g3_i5	120
TR32849|c1_g1_i2	116
TR32849|c1_g1_i3	216
TR3286|c0_g1_i2	68
TR32871|c0_g6_i1	104
TR32875|c0_g1_i4	112
[truncated: 12,211 more rows]

## Sheet: AMPHID2 specific
TrID	AMPHID2 readcount
TR10024|c0_g1_i1	220
TR10025|c1_g1_i2	42
TR1003|c0_g1_i1	152
TR10043|c0_g2_i1	26
TR10069|c0_g2_i1	22
TR10174|c0_g1_i1	28
TR10182|c0_g1_i2	22
TR10213|c0_g2_i1	22
TR10214|c0_g1_i1	28
TR10358|c0_g1_i1	38
TR10397|c0_g1_i2	28
TR10750|c0_g2_i1	32
TR10783|c0_g1_i1	204
TR10783|c0_g1_i3	182
TR10783|c0_g1_i5	288
TR1094|c0_g1_i2	26
TR11026|c0_g1_i1	24
TR1109|c0_g1_i1	70
TR11239|c0_g1_i1	26
TR11249|c0_g1_i1	12
TR1130|c0_g1_i1	30
TR11338|c0_g1_i2	34
TR11353|c0_g1_i1	38
TR11379|c0_g1_i1	38
TR11407|c0_g1_i1	32
TR11415|c0_g1_i1	68
TR11554|c0_g1_i1	52
TR11563|c0_g1_i1	20
TR11646|c0_g1_i1	60
TR11672|c0_g1_i1	18
TR11714|c0_g1_i1	18
TR11752|c0_g1_i1	18
TR1181|c0_g2_i1	70
TR11815|c0_g1_i1	20
TR11832|c0_g1_i1	42
TR11959|c0_g2_i1	20
TR11981|c0_g3_i1	56
TR12021|c0_g1_i1	88
TR12046|c0_g1_i2	40
TR12101|c0_g1_i1	58
TR12107|c0_g1_i1	62
TR12107|c0_g1_i2	62
TR12109|c0_g1_i1	124
TR1220|c0_g1_i1	26
TR12273|c0_g2_i1	92
TR12324|c0_g1_i1	100
TR12358|c0_g1_i1	70
TR12412|c0_g1_i1	528
TR1242|c0_g1_i1	54
TR12421|c0_g1_i1	18
TR12460|c0_g1_i1	328
TR1256|c0_g1_i1	88
TR12645|c0_g2_i1	102
TR12691|c0_g1_i1	40
TR12726|c0_g1_i1	154
TR12744|c0_g1_i1	32
TR12808|c0_g1_i1	12
TR12855|c0_g1_i1	34
TR12890|c0_g1_i1	28
TR13029|c0_g1_i1	20
TR13050|c0_g1_i1	26
TR13072|c0_g2_i1	28
TR13131|c0_g1_i1	24
TR13208|c0_g1_i1	32
TR13287|c0_g1_i1	36
TR13288|c0_g1_i1	22
TR13343|c0_g1_i1	32
TR13501|c0_g1_i1	32
TR13567|c0_g1_i1	16
TR13595|c0_g1_i1	32
TR13762|c0_g1_i1	22
TR13764|c0_g1_i1	24
TR13772|c0_g1_i1	32
TR13829|c0_g1_i1	22
TR13948|c0_g2_i1	22
TR13966|c0_g1_i1	26
TR13987|c0_g1_i2	72
TR13994|c0_g1_i1	16
TR14086|c0_g1_i1	52
TR14086|c0_g2_i1	34
TR14086|c0_g4_i1	34
TR14123|c0_g1_i1	16
TR14143|c0_g1_i1	22
TR14171|c0_g2_i1	28
TR14201|c0_g2_i1	22
TR1428|c0_g1_i1	22
TR14300|c0_g1_i1	28
TR14312|c0_g1_i1	26
TR14323|c0_g1_i2	54
TR14369|c0_g1_i1	114
TR14390|c0_g1_i1	26
TR14392|c0_g1_i1	24
TR1447|c0_g1_i1	40
TR1448|c0_g1_i1	14
TR14485|c0_g1_i1	62
TR14501|c0_g1_i1	42
TR14602|c0_g1_i1	786
TR14639|c0_g1_i1	86
TR14642|c0_g1_i1	22
TR1465|c0_g1_i2	24
TR1466|c0_g2_i1	22
TR14670|c0_g1_i1	34
TR14684|c0_g1_i1	16
TR14720|c0_g1_i1	54
TR14733|c0_g1_i1	12
TR1479|c0_g2_i1	124
TR148|c0_g1_i1	34
TR14887|c0_g1_i1	28
TR14907|c0_g1_i1	34
TR14914|c0_g1_i1	28
TR15085|c0_g1_i1	22
TR15129|c0_g1_i1	32
TR15134|c0_g1_i1	34
TR15166|c0_g1_i1	32
TR1522|c0_g1_i1	26
TR1522|c1_g1_i1	48
TR1531|c0_g1_i1	38
TR15340|c0_g1_i1	90
TR15444|c0_g1_i1	40
TR15468|c0_g1_i1	36
TR15501|c0_g1_i1	28
TR15506|c0_g1_i1	12
TR15665|c0_g1_i1	22
TR15706|c0_g1_i1	24
TR15725|c0_g1_i2	26
TR1580|c0_g1_i1	96
TR16000|c0_g1_i1	16
TR16037|c0_g1_i1	52
TR16047|c0_g1_i1	62
TR16141|c0_g2_i1	76
TR1615|c0_g2_i1	108
TR16225|c0_g1_i1	32
TR16237|c0_g2_i2	570
TR16308|c0_g1_i1	24
TR16325|c0_g2_i2	18
TR16495|c0_g1_i1	32
TR16500|c0_g1_i1	22
TR16509|c1_g1_i1	1470
TR1656|c0_g1_i1	34
TR16571|c0_g2_i1	22
TR16582|c0_g1_i1	18
TR16609|c0_g1_i1	20
TR16614|c0_g1_i1	64
TR1667|c0_g1_i3	236
TR16684|c0_g1_i1	24
TR1673|c0_g1_i1	40
TR16961|c0_g1_i1	50
TR17021|c0_g1_i2	68
TR17081|c0_g1_i1	16
TR17091|c0_g1_i1	36
TR17142|c0_g1_i1	14
TR17163|c0_g1_i2	24
TR17166|c0_g1_i1	90
TR17166|c0_g3_i1	82
TR17240|c0_g1_i1	14
TR17245|c0_g1_i1	16
TR17265|c0_g1_i1	46
TR17305|c0_g1_i1	46
TR1731|c0_g2_i1	50
TR17311|c0_g1_i2	92
TR17329|c0_g1_i1	40
TR17330|c0_g1_i3	46
TR17361|c0_g1_i1	316
TR17385|c0_g1_i1	10
TR1739|c0_g1_i1	48
TR17404|c0_g1_i1	28
TR17408|c0_g1_i1	16
TR17459|c0_g1_i1	42
TR17490|c0_g1_i1	28
TR17551|c0_g1_i1	16
TR17604|c0_g1_i1	22
TR17657|c0_g1_i1	40
TR17675|c0_g1_i1	22
TR17678|c0_g1_i1	12
TR17754|c0_g1_i1	20
TR17761|c0_g1_i1	28
TR17780|c0_g1_i1	26
TR17799|c0_g1_i1	26
TR17805|c0_g2_i1	20
TR17806|c0_g1_i1	32
TR17807|c1_g1_i1	16
TR17841|c0_g1_i2	40
TR17851|c0_g1_i1	60
TR17852|c0_g1_i1	16
TR17880|c0_g1_i1	40
TR17903|c0_g1_i1	22
TR17944|c0_g2_i1	12
TR17945|c0_g3_i1	74
TR17945|c0_g4_i1	46
TR17966|c0_g1_i2	36
TR17995|c0_g1_i1	20
TR17996|c0_g1_i1	24
TR17996|c0_g1_i2	52
TR18017|c0_g1_i1	52
TR18047|c0_g1_i1	16
TR18100|c0_g1_i1	60
TR18100|c0_g2_i1	48
TR18109|c0_g3_i2	16
TR18144|c1_g1_i1	168
TR18157|c0_g1_i1	38
TR18159|c0_g2_i1	16
TR18205|c0_g1_i1	16
TR18261|c0_g2_i1	12
TR18263|c0_g1_i1	42
TR18273|c0_g2_i1	40
TR18281|c0_g1_i1	62
TR18288|c0_g2_i1	78
TR1829|c0_g1_i1	12
TR18322|c0_g1_i1	16
TR18329|c0_g1_i1	20
TR18366|c0_g1_i2	26
TR18395|c0_g1_i4	80
TR18395|c0_g1_i5	14
TR18419|c0_g1_i1	72
TR18453|c0_g1_i1	172
TR18453|c0_g1_i2	110
TR18478|c1_g1_i1	40
TR18478|c1_g1_i2	30
TR18506|c0_g1_i1	22
TR18548|c0_g1_i1	38
TR18584|c0_g1_i1	112
TR18634|c0_g1_i1	20
TR18636|c0_g2_i1	16
TR18650|c0_g2_i1	34
TR18650|c0_g4_i1	32
TR1867|c0_g1_i1	24
TR18697|c0_g1_i1	26
TR18720|c0_g1_i1	48
TR18731|c0_g1_i1	80
TR18736|c0_g1_i1	20
TR18745|c0_g1_i1	18
TR18755|c0_g1_i2	22
TR18788|c0_g1_i1	48
TR18798|c0_g2_i1	684
TR18849|c0_g2_i1	92
TR18865|c0_g1_i1	16
TR18865|c0_g1_i2	44
TR18867|c0_g1_i1	74
TR18883|c1_g1_i1	18
TR18899|c0_g1_i2	66
TR18905|c0_g3_i1	38
TR1891|c0_g2_i1	34
TR1893|c0_g1_i1	102
TR18957|c0_g1_i1	18
TR19025|c0_g1_i1	122
TR19050|c0_g1_i1	38
TR19058|c0_g1_i1	18
TR19077|c0_g1_i1	54
TR19099|c0_g1_i1	12
TR19108|c0_g2_i1	28
TR1911|c0_g1_i1	24
TR1911|c0_g2_i1	36
TR19116|c0_g1_i1	30
TR19125|c0_g1_i2	20
TR19137|c0_g1_i3	228
TR1917|c0_g2_i1	68
TR19205|c0_g1_i1	36
TR19231|c0_g1_i1	382
TR1926|c0_g1_i2	14
TR19264|c0_g1_i1	10
TR19318|c1_g1_i2	22
TR19328|c0_g1_i1	30
TR19328|c0_g2_i1	34
TR19335|c0_g1_i2	38
TR19335|c0_g1_i3	26
TR19356|c0_g1_i1	38
TR19356|c0_g2_i1	18
TR19375|c0_g1_i1	12
TR19383|c0_g1_i1	26
TR19399|c0_g1_i1	180
TR19399|c0_g2_i1	258
TR19414|c0_g1_i1	12
TR19425|c0_g3_i1	26
TR19450|c0_g2_i1	62
TR19450|c0_g2_i2	86
TR19472|c0_g1_i1	24
TR19486|c0_g1_i2	178
TR19523|c0_g1_i2	122
TR19535|c0_g1_i1	18
TR19536|c0_g1_i1	460
TR19540|c0_g1_i1	118
TR19543|c0_g1_i1	136
TR19547|c0_g1_i1	240
TR19547|c2_g1_i2	104
TR19547|c2_g1_i3	428
TR19603|c0_g1_i1	46
TR19611|c0_g3_i1	32
TR19612|c0_g1_i1	30
TR1962|c0_g1_i1	52
TR19626|c0_g1_i1	144
TR19626|c0_g1_i2	142
TR19639|c0_g1_i1	64
TR19698|c0_g1_i1	20
TR19728|c0_g1_i1	22
TR19728|c0_g2_i1	70
TR19741|c1_g1_i1	72
TR19744|c0_g1_i2	76
TR19744|c0_g1_i3	104
TR19797|c0_g1_i1	46
TR19860|c0_g1_i1	12
TR19895|c1_g3_i1	40
TR19910|c0_g1_i1	36
TR19920|c0_g1_i1	14
TR19928|c0_g1_i1	22
TR19971|c0_g1_i1	16
TR19983|c0_g1_i1	16
TR19997|c0_g1_i1	16
TR20003|c0_g1_i1	24
TR20008|c0_g1_i1	56
TR20068|c0_g2_i1	70
TR20070|c0_g1_i2	228
TR20081|c0_g1_i1	54
TR20082|c0_g1_i1	24
TR20119|c0_g1_i2	58
TR20119|c0_g1_i4	22
TR20124|c1_g1_i2	28
TR20151|c0_g1_i2	18
TR20189|c0_g1_i1	30
TR20199|c0_g1_i1	30
TR20249|c0_g1_i1	38
TR2026|c0_g2_i1	42
TR20263|c0_g1_i1	30
TR20307|c0_g1_i2	24
TR20308|c0_g1_i2	14
TR20350|c0_g1_i1	100
TR20372|c0_g1_i1	16
TR20378|c0_g1_i3	26
TR20393|c0_g2_i1	112
TR20432|c0_g1_i2	76
TR20438|c0_g1_i1	20
TR20451|c0_g1_i1	22
TR20459|c0_g1_i1	20
TR20554|c0_g1_i3	44
TR20581|c0_g1_i1	24
TR20586|c0_g1_i1	72
TR20605|c0_g1_i1	56
TR20606|c1_g1_i1	40
TR20665|c0_g1_i1	540
TR2067|c0_g1_i1	48
TR20704|c0_g1_i3	336
TR20704|c0_g2_i1	394
TR20714|c0_g1_i1	20
TR20714|c0_g1_i3	34
TR20714|c0_g1_i5	34
TR20720|c0_g1_i1	14
TR20745|c0_g1_i2	38
TR20767|c1_g1_i1	24
TR20786|c0_g1_i1	14
TR20798|c0_g1_i1	20
TR20812|c0_g1_i1	316
TR20833|c0_g1_i3	56
TR20845|c0_g2_i1	14
TR20850|c0_g1_i2	38
TR20855|c0_g2_i2	34
TR20877|c0_g1_i1	64
TR20903|c0_g1_i4	26
TR20919|c0_g1_i2	158
TR2092|c0_g1_i1	160
TR20923|c0_g1_i1	36
TR20924|c0_g1_i3	16
TR20932|c0_g1_i2	130
TR20937|c0_g2_i1	14
TR2094|c0_g2_i1	226
TR20948|c0_g1_i1	28
TR20987|c0_g1_i3	36
TR21001|c0_g1_i1	30
TR21001|c0_g1_i4	184
TR21037|c0_g2_i1	14
TR21042|c0_g1_i2	34
TR21053|c1_g1_i7	32
TR21101|c0_g1_i2	42
TR21127|c0_g1_i1	20
TR21154|c0_g1_i1	24
TR21154|c1_g2_i1	24
TR21154|c1_g3_i1	30
TR21186|c0_g1_i1	270
TR21189|c0_g1_i1	48
TR212|c0_g1_i1	38
TR21201|c0_g1_i1	62
TR21220|c0_g1_i2	20
TR21224|c0_g1_i1	22
TR21231|c0_g1_i1	60
TR21246|c0_g2_i2	16
TR21256|c0_g1_i2	44
TR21263|c0_g3_i1	26
TR21276|c0_g1_i2	72
TR21286|c0_g1_i1	24
TR21300|c0_g1_i2	38
TR21319|c0_g1_i1	88
TR21358|c2_g1_i1	22
TR21365|c0_g1_i2	74
TR21377|c0_g1_i1	114
TR21385|c0_g2_i1	178
TR21386|c0_g4_i1	36
TR21389|c0_g1_i3	38
TR21397|c0_g1_i3	72
TR21400|c0_g1_i6	46
TR21473|c0_g1_i1	1388
TR21617|c0_g1_i1	24
TR2162|c0_g1_i1	88
TR2162|c0_g1_i4	76
TR2162|c0_g1_i5	64
TR21624|c0_g1_i1	72
TR21624|c0_g1_i4	64
TR21637|c0_g1_i4	32
TR21642|c0_g1_i1	26
TR21667|c0_g1_i1	16
TR21672|c1_g2_i1	14
TR21683|c2_g1_i1	236
TR2170|c1_g2_i1	32
TR2170|c1_g4_i1	326
TR21700|c0_g1_i1	24
TR21701|c0_g3_i1	24
TR21711|c0_g1_i1	26
TR2172|c0_g2_i3	36
TR2172|c0_g2_i6	24
TR2172|c0_g3_i1	14
TR21741|c0_g1_i1	102
TR21747|c0_g1_i1	30
TR21755|c0_g1_i1	30
TR2178|c6_g2_i1	28
TR2178|c6_g3_i1	52
TR2179|c0_g1_i2	126
TR21792|c2_g1_i1	36
TR21805|c0_g1_i1	40
TR2182|c0_g1_i5	30
TR21821|c0_g1_i1	82
TR21825|c0_g1_i1	26
TR21829|c0_g1_i1	50
TR2183|c0_g1_i2	90
TR2184|c0_g1_i1	46
TR21848|c0_g1_i3	28
TR21856|c0_g3_i1	36
TR21863|c0_g1_i1	22
TR2187|c0_g1_i11	84
TR2187|c0_g1_i4	76
TR21880|c0_g1_i1	40
TR21881|c0_g1_i1	116
TR21881|c0_g4_i1	94
TR21882|c0_g1_i3	102
TR21882|c0_g1_i5	38
TR2190|c0_g1_i1	138
TR21904|c0_g1_i2	42
TR21912|c0_g1_i2	20
TR2192|c0_g2_i2	168
TR21928|c0_g1_i3	36
TR21931|c0_g1_i1	30
TR21958|c0_g2_i3	48
TR2196|c0_g2_i1	68
TR21975|c0_g2_i1	20
TR21979|c0_g1_i3	30
TR21991|c0_g2_i2	38
TR2203|c1_g1_i1	100
TR22036|c0_g1_i1	22
TR22037|c0_g1_i1	260
TR22037|c0_g1_i2	48
TR2204|c0_g1_i5	34
TR22043|c0_g1_i1	102
TR2205|c0_g1_i1	804
TR22051|c0_g1_i2	90
TR2207|c0_g1_i6	60
TR22076|c0_g3_i2	42
TR22076|c0_g3_i3	14
TR22105|c0_g1_i2	178
TR22110|c0_g2_i1	36
TR2212|c1_g1_i3	22
TR2213|c0_g2_i1	22
TR22133|c0_g1_i3	36
TR22142|c0_g1_i1	34
TR22153|c0_g1_i2	42
TR2216|c1_g4_i5	110
TR2216|c1_g4_i7	196
TR22164|c0_g1_i1	44
TR2217|c0_g1_i4	120
TR2217|c1_g1_i3	210
TR22173|c0_g1_i1	24
TR2218|c1_g4_i13	48
TR2218|c1_g4_i5	32
TR22186|c1_g1_i1	24
TR22210|c0_g1_i1	400
TR2223|c0_g1_i4	36
TR2225|c1_g11_i9	362
TR2225|c1_g5_i1	32
TR22255|c0_g1_i2	120
TR22255|c0_g1_i3	124
TR22257|c0_g1_i5	50
TR22263|c0_g1_i1	46
TR2227|c2_g1_i3	66
TR2228|c0_g1_i2	94
TR2228|c0_g1_i4	176
TR22303|c0_g2_i1	56
TR2233|c3_g3_i3	40
TR22339|c0_g2_i2	12
TR22342|c0_g1_i1	14
TR22350|c0_g1_i1	46
TR22351|c0_g1_i1	18
TR2237|c0_g2_i2	32
TR2237|c0_g3_i1	60
TR2239|c0_g3_i7	338
TR22398|c0_g1_i2	32
TR2240|c0_g1_i1	34
TR2240|c0_g1_i3	110
TR2240|c0_g1_i4	38
TR22409|c0_g1_i1	20
TR22414|c0_g2_i1	274
TR22414|c0_g3_i1	76
TR2244|c1_g1_i1	572
TR2248|c0_g1_i1	160
TR2248|c1_g1_i2	104
TR2248|c1_g6_i2	74
TR22495|c0_g1_i1	88
TR2250|c2_g2_i1	70
TR22523|c0_g1_i1	32
TR2254|c0_g1_i7	274
TR2254|c0_g1_i9	102
TR2255|c10_g2_i1	46
TR2255|c10_g3_i2	708
TR2256|c3_g1_i7	138
TR2256|c3_g1_i8	364
TR22565|c1_g1_i1	124
TR22565|c1_g1_i2	132
TR2257|c0_g1_i3	36
TR22581|c0_g1_i3	14
TR22597|c0_g1_i1	20
TR22608|c1_g1_i1	20
TR2262|c0_g6_i1	18
TR2262|c0_g8_i1	28
TR2263|c1_g1_i10	52
TR2263|c1_g1_i6	20
TR2263|c1_g3_i1	32
TR2264|c0_g1_i1	70
TR22646|c0_g1_i1	36
TR22646|c0_g2_i2	54
TR22662|c0_g1_i1	32
TR22662|c0_g2_i1	34
TR22662|c1_g2_i1	14
TR22662|c1_g3_i1	74
TR22674|c0_g2_i1	140
TR2268|c0_g1_i3	46
TR2269|c0_g1_i2	96
TR22715|c0_g1_i1	70
TR22715|c0_g2_i1	68
TR2272|c0_g2_i3	32
TR22729|c0_g1_i2	22
TR22730|c0_g5_i1	24
TR2274|c0_g1_i6	92
TR22742|c0_g1_i1	70
TR22742|c0_g1_i2	84
TR22755|c0_g2_i1	122
TR22762|c0_g1_i1	116
TR22766|c0_g1_i1	184
TR22776|c0_g2_i2	62
TR22786|c0_g1_i1	34
TR22801|c0_g1_i1	22
TR2282|c0_g3_i2	14
TR2283|c0_g2_i3	70
TR2283|c0_g3_i2	54
TR22836|c0_g1_i1	56
TR2286|c0_g1_i1	46
TR22892|c0_g2_i2	42
TR2290|c0_g2_i1	112
TR2290|c0_g2_i3	68
TR22903|c0_g1_i1	42
TR22905|c0_g1_i1	22
TR22925|c0_g2_i1	94
TR22925|c0_g2_i2	488
TR2293|c0_g1_i4	134
TR2294|c0_g7_i1	54
TR22944|c0_g1_i3	16
TR22947|c0_g1_i2	54
TR22951|c0_g1_i1	54
TR22952|c0_g3_i1	30
TR2296|c0_g4_i2	50
TR22964|c0_g1_i1	448
TR2297|c0_g2_i1	148
TR22973|c0_g1_i1	24
TR23001|c0_g1_i2	104
TR23014|c0_g1_i2	60
TR23015|c0_g1_i2	70
TR2302|c0_g1_i1	152
TR23025|c0_g1_i1	76
TR23029|c0_g1_i1	82
TR2303|c0_g2_i1	42
TR2303|c1_g1_i1	102
TR23036|c0_g1_i1	30
TR23040|c1_g1_i1	56
TR23049|c0_g1_i1	28
TR2305|c0_g1_i1	26
TR2305|c0_g1_i2	30
TR2305|c0_g1_i4	52
TR2307|c0_g1_i2	536
TR2308|c3_g1_i2	110
TR2308|c3_g1_i3	90
TR23086|c0_g2_i2	46
TR23088|c0_g1_i1	1128
TR2309|c0_g1_i1	34
TR23119|c0_g2_i1	184
TR2312|c0_g3_i1	62
TR2312|c0_g4_i7	34
TR2312|c0_g4_i9	46
TR23125|c0_g1_i2	32
TR23126|c0_g1_i4	122
TR23126|c0_g2_i1	26
TR23129|c0_g1_i1	62
TR23129|c0_g1_i2	112
TR23129|c0_g1_i3	120
TR23129|c0_g1_i4	64
TR23129|c0_g2_i1	16
TR23129|c0_g3_i2	38
TR2313|c0_g2_i2	98
TR2313|c0_g2_i3	122
TR2313|c0_g2_i5	70
TR23150|c1_g1_i1	44
TR23161|c0_g1_i1	16
TR23167|c0_g1_i2	32
TR23167|c0_g1_i3	30
TR23168|c1_g1_i1	32
TR23168|c1_g2_i1	28
TR2317|c1_g1_i2	494
TR23170|c0_g1_i3	18
TR23173|c0_g1_i1	16
TR23179|c0_g1_i1	32
TR23179|c0_g1_i2	28
TR23182|c0_g1_i1	186
TR23200|c1_g1_i1	296
TR23205|c0_g2_i1	42
TR23208|c0_g1_i2	72
TR23208|c0_g1_i3	26
TR23208|c0_g1_i4	126
TR23214|c0_g2_i3	24
TR2322|c0_g1_i3	52
TR2323|c0_g1_i3	150
TR23233|c0_g1_i2	404
TR23240|c0_g2_i1	28
TR23240|c0_g2_i2	22
TR23249|c0_g1_i1	16
TR23257|c0_g1_i4	58
TR2327|c0_g1_i2	16
TR23278|c0_g1_i3	38
TR2329|c0_g3_i1	754
TR2330|c0_g1_i5	48
TR23317|c0_g4_i1	70
TR23339|c0_g1_i1	100
TR2334|c0_g1_i2	98
TR23358|c0_g1_i1	46
TR2337|c0_g1_i6	56
TR23380|c0_g2_i1	12
TR2339|c0_g1_i1	114
TR2339|c0_g1_i2	76
TR2339|c0_g1_i5	102
TR2340|c0_g1_i10	44
TR2340|c0_g1_i6	76
TR2340|c0_g1_i7	654
TR23405|c0_g1_i1	28
TR2343|c0_g1_i1	16
TR23454|c0_g1_i1	38
TR23478|c0_g2_i1	40
TR2348|c0_g1_i3	1062
TR23492|c0_g1_i1	22
TR2350|c0_g1_i2	278
TR2350|c0_g2_i3	150
TR2351|c1_g1_i3	54
TR2351|c1_g3_i1	16
TR23518|c0_g1_i1	54
TR23534|c0_g4_i2	88
TR23534|c0_g5_i2	64
TR23540|c0_g1_i2	42
TR23548|c0_g2_i1	32
TR23561|c0_g6_i1	16
TR2358|c0_g1_i2	60
TR2358|c0_g1_i3	110
TR23580|c0_g1_i1	46
TR2360|c0_g1_i2	76
TR2360|c0_g1_i4	192
TR2360|c0_g1_i5	54
TR2360|c0_g1_i9	168
TR23601|c0_g2_i2	14
TR23615|c0_g2_i1	32
TR23623|c0_g1_i1	80
TR23623|c0_g2_i1	78
TR23632|c0_g1_i1	36
TR2364|c0_g1_i2	48
TR23658|c0_g1_i1	104
TR23659|c0_g1_i3	54
TR23668|c0_g1_i1	42
TR2367|c0_g1_i2	40
TR2369|c0_g1_i5	30
TR2369|c0_g4_i2	30
TR23691|c1_g1_i2	58
TR23692|c0_g1_i1	38
TR23696|c0_g1_i3	50
TR23697|c0_g1_i1	56
TR2370|c0_g1_i1	14
TR2370|c0_g3_i1	40
TR23712|c0_g2_i1	22
TR23719|c0_g2_i1	32
TR23731|c0_g2_i1	36
TR23731|c0_g2_i3	42
TR23747|c0_g1_i2	164
TR23767|c0_g1_i1	62
TR23775|c0_g1_i1	90
TR23775|c0_g1_i3	136
TR23777|c0_g1_i2	38
TR23777|c0_g1_i3	16
TR2379|c1_g1_i1	126
TR23809|c0_g1_i2	104
TR2381|c0_g1_i4	74
TR23823|c0_g1_i2	18492
TR2384|c0_g3_i1	20
TR23850|c0_g2_i3	148
TR23850|c0_g2_i4	130
TR23859|c0_g1_i1	22
TR23866|c0_g2_i2	32
TR23876|c0_g1_i1	56
TR23882|c0_g1_i4	26
TR2389|c0_g2_i5	34
TR2389|c0_g3_i1	20
TR23898|c0_g1_i10	46
TR23898|c0_g1_i7	56
TR23898|c0_g1_i9	220
TR23914|c0_g1_i1	44
TR2392|c0_g2_i3	196
TR2392|c0_g2_i4	32
TR23920|c0_g1_i1	398
TR23926|c0_g1_i1	122
TR23936|c0_g2_i1	130
TR23936|c0_g2_i2	496
TR23939|c3_g1_i2	24
TR23939|c3_g4_i1	22
TR23939|c3_g5_i2	16
TR2395|c0_g1_i1	48
TR23961|c0_g2_i1	12
TR2397|c0_g1_i1	122
TR23991|c0_g3_i5	160
TR23992|c0_g1_i2	110
TR23996|c0_g2_i2	36
TR23999|c0_g1_i1	66
TR24007|c0_g5_i1	22
TR24010|c0_g1_i1	14
TR24012|c0_g1_i3	22
TR24040|c0_g1_i1	34
TR24041|c0_g1_i2	82
TR24048|c0_g1_i2	734
TR24050|c0_g1_i1	64
TR24060|c1_g2_i2	42
TR24063|c0_g2_i1	20
TR2407|c0_g1_i3	100
TR24072|c0_g1_i1	192
TR24078|c0_g1_i3	28
TR24078|c0_g1_i4	34
TR2409|c0_g4_i1	74
TR24090|c0_g2_i5	70
TR2410|c0_g2_i1	18
TR24102|c0_g1_i1	40
TR2411|c0_g1_i1	50
TR2411|c0_g1_i4	50
TR24117|c0_g2_i1	30
TR2412|c0_g1_i3	130
TR2413|c0_g4_i1	32
TR2415|c1_g1_i1	32
TR2415|c2_g1_i1	68
TR2415|c2_g1_i2	76
TR24166|c0_g1_i1	330
TR24170|c0_g1_i2	86
TR24177|c0_g1_i1	10
TR24177|c4_g1_i1	148
TR24177|c4_g1_i3	96
TR24177|c4_g2_i1	116
TR24177|c4_g2_i3	172
TR24177|c4_g2_i4	134
TR2419|c0_g1_i3	38
TR24198|c0_g1_i1	150
TR2420|c3_g3_i2	80
TR24201|c0_g1_i1	30
TR24217|c0_g2_i2	52
TR24221|c0_g1_i1	24
TR24222|c0_g1_i1	20
TR24232|c0_g1_i5	30
TR24241|c0_g1_i1	28
TR24244|c0_g4_i1	42
TR24246|c0_g1_i2	28
TR24247|c0_g1_i1	34
TR2425|c0_g2_i5	40
TR2425|c0_g2_i6	970
TR2425|c0_g3_i1	374
TR2427|c0_g1_i2	86
TR2429|c0_g1_i1	166
TR2429|c0_g2_i4	1232
TR24290|c0_g1_i1	16
TR24324|c0_g1_i2	18
TR2435|c0_g4_i1	470
TR2435|c0_g6_i1	3322
TR2435|c0_g6_i4	3882
TR24374|c0_g1_i1	30
TR24377|c0_g2_i1	402
TR24399|c0_g3_i1	38
TR24403|c1_g1_i1	16
TR24407|c0_g1_i1	22
TR2441|c0_g1_i2	118
TR24414|c0_g1_i1	124
TR24427|c0_g2_i1	150
TR2443|c1_g3_i11	276
TR24432|c0_g1_i1	116
TR24497|c0_g1_i1	210
TR24501|c0_g1_i1	36
TR24510|c0_g2_i1	166
TR24513|c0_g1_i1	30
TR24522|c0_g1_i2	30
TR24535|c0_g1_i1	18
TR24535|c0_g1_i4	240
TR24540|c0_g1_i1	18
TR24549|c0_g1_i4	66
TR2455|c0_g1_i2	62
TR24553|c0_g1_i3	28
TR24560|c0_g1_i3	38
TR24570|c1_g1_i4	172
TR24571|c0_g1_i4	56
TR24575|c0_g1_i5	90
TR24577|c0_g2_i1	24
TR24579|c0_g1_i1	40
TR24581|c0_g1_i2	26
TR2459|c0_g1_i4	58
TR24603|c0_g1_i2	64
TR24607|c0_g1_i1	16
TR2462|c0_g2_i1	36
TR24626|c0_g2_i1	136
TR24635|c0_g1_i2	36
TR2464|c0_g1_i2	324
TR24648|c0_g1_i2	172
TR24653|c0_g1_i1	392
TR24655|c0_g1_i2	14
TR24655|c0_g1_i3	28
TR24667|c1_g1_i2	112
TR24667|c1_g1_i3	96
TR24677|c0_g1_i1	34
TR24682|c0_g2_i1	46
TR24682|c0_g2_i11	42
TR2470|c1_g1_i1	68
TR2470|c1_g1_i10	22
TR2470|c1_g1_i11	38
TR2470|c1_g1_i2	80
TR2470|c1_g1_i9	140
TR2470|c1_g4_i1	34
TR24705|c1_g2_i1	226
TR24705|c1_g2_i3	202
TR2471|c0_g1_i3	318
TR24715|c0_g2_i1	27108
TR24727|c0_g2_i1	20
TR24742|c0_g1_i4	32
TR24744|c0_g1_i3	46
TR24749|c0_g1_i1	26
TR2475|c0_g3_i3	378
TR24755|c0_g1_i1	48
TR24760|c0_g2_i1	156
TR2477|c0_g1_i1	116
TR24776|c0_g1_i1	18
TR24776|c0_g2_i2	62
TR24782|c0_g1_i1	60
TR24798|c0_g1_i2	100
TR24798|c0_g2_i4	736
TR24813|c0_g2_i1	26
TR24814|c1_g1_i3	98
TR24816|c0_g1_i2	132
TR2483|c0_g2_i2	48
TR2483|c0_g2_i5	34
TR24833|c0_g1_i1	20
TR24853|c0_g2_i2	20
TR2486|c0_g2_i1	114
TR24869|c0_g1_i2	78
TR24879|c1_g2_i1	56
TR24879|c1_g2_i6	72
TR24879|c1_g2_i7	50
TR24879|c1_g2_i8	82
TR24879|c1_g2_i9	50
TR24883|c1_g1_i1	24
TR24894|c0_g2_i2	26
TR24897|c0_g1_i1	226
TR2490|c0_g1_i1	150
TR2491|c0_g1_i3	288
TR24928|c0_g3_i1	42
TR24934|c0_g1_i1	46
TR24934|c0_g1_i4	58
TR24942|c0_g1_i2	32
TR24943|c0_g2_i2	314
TR24943|c0_g2_i3	330
TR24948|c0_g1_i1	64
TR24949|c0_g1_i3	92
TR2495|c1_g1_i4	116
TR2496|c0_g1_i4	140
TR24961|c0_g1_i2	24
TR2497|c0_g1_i1	284
TR2497|c0_g3_i4	2658
TR24981|c0_g1_i1	194
TR24984|c0_g1_i1	76
TR24984|c0_g1_i2	36
TR2499|c0_g1_i1	50
TR24992|c0_g1_i1	40
TR2500|c0_g1_i3	16
TR25005|c0_g2_i1	64
TR25007|c0_g1_i2	28
TR2501|c1_g1_i3	234
TR2501|c1_g2_i1	16
TR25026|c0_g1_i1	26
TR25028|c0_g1_i2	84
TR25028|c0_g1_i4	106
TR25033|c0_g1_i4	12
TR25036|c0_g2_i1	52
TR2504|c0_g2_i2	120
TR2504|c0_g3_i1	14
TR2504|c0_g3_i5	54
TR25046|c0_g1_i2	46
TR25053|c1_g1_i1	22
TR25053|c1_g1_i2	40
TR25053|c1_g2_i1	16
TR2506|c0_g2_i2	58
TR2507|c0_g1_i1	36
TR25076|c3_g2_i1	1098
TR25078|c1_g1_i7	58
TR2508|c0_g1_i2	78
TR25099|c0_g1_i2	20
TR25109|c0_g5_i1	14
TR25111|c0_g2_i1	174
TR25111|c0_g2_i2	48
TR25116|c0_g1_i1	46
TR25119|c0_g1_i1	108
TR25131|c0_g1_i1	50
TR25135|c0_g3_i1	28
TR25137|c1_g1_i1	56
TR2514|c1_g10_i3	100
TR2517|c0_g1_i2	26
TR2517|c0_g1_i3	86
TR2519|c0_g1_i3	64
TR25193|c0_g1_i2	32
TR2521|c0_g1_i1	72
TR2522|c0_g1_i2	36
TR2522|c0_g1_i4	102
TR25222|c0_g2_i1	54
TR25227|c0_g1_i3	38
TR2524|c0_g1_i2	84
TR25258|c0_g1_i3	38
TR25258|c0_g1_i4	26
TR25261|c0_g1_i1	18
TR25267|c0_g2_i1	100
TR25267|c0_g2_i2	104
TR25267|c0_g2_i3	110
TR25272|c0_g4_i1	254
TR25274|c0_g1_i2	46
TR25277|c1_g1_i1	46
TR25277|c1_g2_i1	760
TR2528|c3_g1_i4	84
TR25286|c0_g1_i3	24
TR25292|c0_g1_i1	64
TR25301|c0_g2_i2	36
TR2532|c0_g4_i3	56
TR25332|c0_g1_i2	46
TR25343|c1_g1_i3	28
TR25345|c0_g1_i5	14
TR25345|c0_g1_i6	576
TR25355|c0_g1_i1	16
TR25355|c0_g1_i2	118
TR25356|c0_g2_i1	42
TR25364|c1_g1_i1	12
TR2538|c0_g1_i1	78
TR2538|c0_g1_i2	34
TR25383|c0_g2_i1	118
TR25384|c0_g1_i1	24
TR2541|c0_g2_i3	64
TR2543|c1_g1_i2	340
TR2543|c1_g1_i6	30
TR2543|c1_g1_i7	132
TR2544|c0_g1_i1	294
TR2544|c0_g4_i1	20
TR2544|c0_g4_i2	44
TR2545|c0_g3_i1	74
TR2546|c0_g1_i1	12
TR2547|c0_g2_i5	232
TR25490|c0_g1_i1	42
TR25495|c0_g1_i1	70
TR2550|c1_g1_i1	34
TR2550|c1_g4_i2	56
TR25524|c0_g2_i1	30
TR25525|c1_g2_i2	20
TR25530|c2_g2_i1	22
TR25544|c0_g1_i1	652
TR25558|c0_g1_i1	66
TR25569|c0_g1_i2	24
TR25570|c0_g1_i3	46
TR25576|c0_g1_i3	30
TR25578|c0_g1_i2	3032
TR25578|c0_g1_i3	2896
TR2558|c2_g3_i1	192
TR2558|c2_g3_i2	84
TR25581|c0_g1_i2	32
TR25586|c1_g4_i1	14
TR2559|c2_g5_i1	152
TR25599|c0_g1_i3	28
TR25600|c0_g1_i2	498
TR25600|c0_g1_i3	454
TR25607|c0_g1_i4	36
TR25613|c0_g1_i3	26
TR25614|c0_g1_i2	22
TR25619|c0_g1_i1	28
TR2562|c0_g8_i2	26
TR2562|c0_g8_i4	44
TR25630|c0_g1_i1	70
TR25636|c0_g1_i2	32
TR2564|c0_g1_i6	52
TR25646|c0_g1_i1	40
TR25648|c0_g1_i3	54
TR25664|c0_g2_i1	32
TR25668|c1_g1_i1	54
TR25675|c0_g1_i1	20
TR25677|c0_g1_i1	170
TR25685|c0_g1_i1	44
TR2569|c0_g1_i10	88
TR2569|c0_g1_i2	136
TR2570|c0_g1_i12	32
TR2570|c0_g1_i9	94
TR25701|c4_g1_i1	82
TR25701|c4_g4_i2	42
TR25701|c4_g4_i4	26
TR25701|c4_g7_i1	16
TR2571|c0_g1_i4	306
TR2571|c1_g3_i2	54
TR2571|c1_g3_i5	38
TR25717|c0_g1_i1	22
TR25718|c0_g1_i2	516
TR25718|c0_g1_i3	130
TR2572|c0_g2_i4	36
TR2572|c1_g2_i3	22
TR25722|c1_g1_i2	30
TR25733|c0_g1_i1	14
TR2575|c0_g2_i1	28
TR25751|c1_g1_i1	320
TR25751|c1_g1_i3	104
TR25751|c2_g1_i1	46
TR25756|c0_g2_i2	60
TR2576|c0_g2_i3	158
TR25764|c0_g1_i1	126
TR2577|c0_g1_i2	26
TR2577|c0_g2_i2	288
TR25770|c0_g1_i1	122
TR2578|c1_g1_i2	194
TR25782|c0_g1_i4	32
TR25783|c0_g1_i1	86
TR25795|c0_g1_i1	32
TR25796|c0_g1_i2	428
TR2580|c0_g1_i6	14
TR2580|c0_g1_i8	110
TR2580|c0_g2_i1	36
TR2580|c0_g3_i3	18
TR2581|c0_g1_i3	162
TR2581|c0_g1_i4	148
TR25814|c1_g1_i3	18
TR25814|c1_g1_i4	20
TR25814|c1_g2_i1	24
TR25814|c1_g2_i3	20
TR25815|c0_g3_i1	418
TR25828|c0_g2_i1	14
TR25835|c0_g3_i1	16
TR25852|c0_g3_i1	196
TR25860|c0_g1_i1	18
TR2589|c0_g1_i1	82
TR2589|c0_g10_i3	196
TR2589|c0_g2_i1	40
TR2589|c0_g5_i1	28
TR25899|c0_g4_i2	250
TR2590|c0_g1_i1	74
TR2590|c0_g1_i6	26
TR25906|c0_g1_i3	72
TR25911|c0_g1_i4	40
TR25915|c0_g1_i2	68
TR25915|c0_g1_i3	40
TR25917|c0_g1_i2	208
TR25917|c0_g1_i5	142
TR25917|c0_g1_i6	110
TR25922|c0_g2_i2	38
TR25938|c0_g1_i3	20
TR25950|c0_g1_i4	20
TR25955|c0_g2_i1	24
TR25956|c0_g4_i1	140
TR2597|c0_g5_i1	28
TR25981|c0_g1_i1	72
TR25989|c0_g1_i2	102
TR2599|c1_g1_i1	30
TR2599|c2_g6_i4	68
TR25995|c1_g1_i1	42
TR25995|c1_g1_i2	30
TR25995|c1_g1_i4	50
TR2600|c0_g1_i1	118
TR2600|c0_g1_i8	140
TR26005|c0_g1_i3	44
TR26009|c0_g1_i1	56
TR26009|c0_g2_i1	68
TR26025|c0_g1_i1	94
TR26028|c0_g1_i3	62
TR26028|c0_g1_i4	42
TR2605|c0_g2_i2	24
TR2605|c0_g3_i1	50
TR26061|c0_g1_i3	22
TR26069|c0_g1_i9	20
TR2607|c2_g2_i1	26
TR26070|c0_g1_i5	40
TR26075|c0_g1_i1	220
TR26075|c0_g1_i3	108
TR26079|c0_g1_i1	40
TR26084|c0_g1_i1	62
TR26090|c0_g2_i1	142
TR26098|c0_g1_i1	42
TR26099|c0_g1_i2	46
TR26100|c0_g2_i1	632
TR26108|c0_g1_i5	54
TR2611|c1_g1_i1	120
TR2611|c1_g1_i7	38
TR26111|c0_g1_i3	54
TR26113|c0_g1_i2	60
TR26115|c0_g2_i1	16
TR26120|c0_g1_i1	14
TR26120|c0_g2_i1	58
TR26121|c0_g1_i1	18
TR26127|c0_g1_i2	136
TR26147|c0_g1_i1	402
TR26148|c0_g1_i2	68
TR2615|c1_g1_i4	64
TR26150|c0_g3_i2	62
TR26151|c0_g1_i4	26
TR26152|c0_g1_i2	30
TR26155|c0_g1_i1	22
TR26158|c0_g3_i1	22
TR26166|c0_g1_i2	136
TR26175|c0_g1_i1	32
TR26177|c0_g1_i1	36
TR2618|c0_g1_i2	42
TR26188|c3_g1_i1	34
TR26193|c0_g1_i4	40
TR26197|c1_g3_i1	32
TR2620|c1_g1_i1	68
TR2620|c3_g1_i1	100
TR26202|c1_g1_i2	48
TR26206|c0_g1_i1	28
TR26209|c0_g1_i2	40
TR26210|c0_g1_i1	12
TR26212|c0_g1_i2	154
TR26213|c0_g1_i4	16
TR26214|c0_g1_i2	28
TR26229|c0_g1_i1	82
TR26229|c0_g1_i3	76
TR26238|c0_g2_i2	24
TR26244|c0_g2_i2	180
TR26249|c0_g1_i1	18
TR26253|c0_g1_i1	32
TR26262|c0_g1_i1	82
TR26272|c0_g1_i1	52
TR26273|c0_g1_i1	26
TR26275|c1_g1_i5	14
TR26275|c1_g1_i7	32
TR26286|c0_g2_i6	192
TR26287|c1_g1_i1	42
TR26287|c1_g3_i1	30
TR26291|c0_g2_i1	18
TR26298|c0_g1_i4	32
TR26299|c0_g1_i2	32
TR26317|c1_g1_i3	32
TR26317|c1_g1_i5	36
TR2632|c1_g1_i2	146
TR2632|c1_g1_i4	200
TR26323|c0_g1_i5	54
TR26327|c0_g2_i1	26
TR26332|c0_g1_i3	38
TR26339|c0_g2_i1	20
TR2634|c1_g1_i2	30
TR26341|c0_g1_i2	74
TR26341|c0_g1_i4	40
TR26342|c0_g1_i2	68
TR26342|c0_g1_i3	94
TR26365|c0_g1_i4	112
TR26369|c1_g2_i1	22
TR26369|c1_g5_i2	204
TR26369|c1_g7_i1	52
TR26369|c1_g7_i2	54
TR26376|c0_g1_i1	154
TR26379|c0_g1_i4	328
TR2638|c0_g1_i1	62
TR26386|c0_g1_i3	20
TR26387|c0_g1_i5	88
TR26390|c0_g1_i3	138
TR26399|c0_g1_i1	104
TR26399|c0_g1_i6	152
TR2640|c0_g2_i1	98
TR2640|c0_g2_i2	258
TR26407|c0_g1_i1	28
TR26410|c0_g3_i1	38
TR26413|c0_g1_i4	222
TR26418|c1_g1_i3	56
TR26421|c0_g1_i1	32
TR26432|c0_g2_i1	72
TR26435|c0_g1_i1	26
TR2644|c0_g2_i2	208
TR26446|c1_g1_i2	466
TR26454|c0_g1_i1	320
TR26466|c0_g1_i3	30
TR26476|c0_g2_i3	228
TR2648|c0_g3_i5	122
TR26480|c0_g1_i2	44
TR2653|c2_g1_i2	860
TR26538|c0_g1_i3	76
TR26538|c0_g1_i6	28
TR26549|c0_g2_i2	34
TR2655|c0_g5_i7	112
TR26550|c0_g4_i1	20
TR26561|c0_g1_i1	98
TR26566|c0_g1_i2	20
TR26572|c0_g1_i4	54
TR26582|c0_g1_i2	40
TR26582|c0_g1_i5	48
TR2660|c0_g1_i1	120
TR2660|c0_g1_i5	154
TR26600|c0_g1_i1	864
TR26607|c0_g1_i1	112
TR26610|c0_g1_i1	44
TR26614|c0_g1_i1	228
TR26618|c0_g1_i3	32
TR26619|c0_g1_i1	24
TR26620|c0_g1_i1	78
TR26623|c0_g1_i4	38
TR26629|c0_g2_i1	26
TR26629|c0_g4_i1	12
TR26630|c1_g1_i1	278
TR26634|c0_g1_i1	22
TR2664|c2_g3_i3	70
TR26645|c0_g1_i1	694
TR26645|c0_g1_i4	240
TR26650|c0_g3_i1	56
TR26657|c0_g1_i2	66
TR2666|c1_g2_i7	262
TR2666|c2_g1_i3	612
TR2666|c2_g1_i4	110
TR2666|c2_g3_i1	34
TR2666|c3_g1_i1	24
TR26660|c0_g1_i4	32
TR26662|c5_g1_i4	34
TR26666|c0_g5_i1	98
TR26666|c0_g6_i1	18
TR26668|c0_g1_i6	26
TR26671|c0_g1_i1	78
TR26671|c1_g1_i4	178
TR26671|c1_g1_i7	170
TR26674|c2_g1_i1	22
TR26674|c2_g1_i4	42
TR26683|c0_g1_i7	24
TR26687|c0_g1_i3	30
TR26688|c0_g3_i4	32
TR26698|c0_g2_i1	44
TR2670|c0_g1_i3	32
TR2670|c0_g1_i5	62
TR26702|c0_g1_i1	44
TR26704|c1_g1_i1	44
TR26705|c1_g2_i3	284
TR26705|c1_g3_i1	50
TR26711|c0_g1_i2	20
TR26711|c1_g1_i1	52
TR26716|c0_g1_i1	44
TR26717|c0_g2_i1	48
TR26717|c0_g2_i4	42
TR2672|c0_g3_i3	68
TR26723|c0_g1_i1	80
TR26728|c0_g1_i1	44
TR26731|c0_g1_i1	80
TR26744|c0_g1_i1	30
TR26747|c0_g1_i1	202
TR26747|c0_g1_i3	102
TR26749|c0_g1_i2	24
TR2675|c0_g2_i10	70
TR2675|c0_g2_i8	806
TR26750|c0_g2_i1	16
TR26763|c0_g1_i1	26
TR26764|c0_g1_i2	62
TR2677|c0_g1_i3	88
TR26775|c0_g1_i1	164
TR26775|c0_g1_i2	120
TR26775|c0_g1_i4	72
TR26775|c0_g1_i7	240
TR26777|c0_g1_i4	32
TR2679|c2_g1_i1	50
TR2679|c2_g1_i2	70
TR26792|c0_g1_i1	46
TR26794|c0_g1_i2	44
TR26799|c0_g1_i2	20
TR26804|c0_g1_i3	14
TR26805|c0_g1_i2	76
TR26806|c0_g1_i3	70
TR26806|c0_g1_i4	34
TR26806|c0_g2_i6	36
TR26813|c1_g2_i1	66
TR26813|c2_g1_i1	478
TR26813|c2_g2_i1	214
TR26818|c0_g1_i4	110
TR26824|c0_g2_i1	132
TR26824|c0_g2_i2	116
TR26826|c0_g1_i4	62
TR26833|c0_g1_i2	188
TR26833|c0_g1_i3	590
TR2684|c0_g2_i5	62
TR2685|c0_g1_i1	62
TR2685|c0_g1_i7	30
TR26851|c0_g1_i4	96
TR26853|c2_g10_i1	26
TR26866|c0_g1_i2	122
TR2687|c0_g1_i2	94
TR26877|c0_g2_i1	162
TR2688|c0_g5_i3	86
TR26887|c1_g1_i1	580
TR26891|c0_g3_i4	72
TR26892|c0_g6_i1	52
TR26897|c0_g1_i2	294
TR26904|c0_g1_i1	52
TR26911|c0_g1_i1	34
TR26916|c0_g1_i2	92
TR26920|c0_g1_i1	74
TR26922|c1_g1_i1	112
TR26928|c0_g1_i2	24
TR2693|c1_g1_i2	46
TR26931|c0_g1_i1	94
TR26933|c0_g2_i1	108
TR26937|c0_g1_i4	42
TR26942|c0_g1_i3	30
TR26942|c0_g2_i2	54
TR26949|c0_g1_i1	26
TR26959|c1_g1_i1	698
TR26962|c0_g1_i3	80
TR26962|c0_g1_i5	50
TR26962|c0_g2_i1	60
TR26968|c0_g1_i2	18
TR26969|c0_g1_i2	856
TR2697|c0_g2_i2	100
TR2697|c0_g2_i3	72
TR2698|c0_g1_i11	184
TR2698|c0_g1_i12	142
TR26985|c0_g4_i1	38
TR26985|c0_g5_i1	18
TR2699|c1_g5_i2	36
TR2699|c1_g8_i2	34
TR26992|c0_g1_i1	14
TR26996|c0_g2_i2	38
TR26998|c0_g1_i1	28
TR26999|c0_g1_i1	64
TR27003|c0_g1_i2	38
TR27010|c0_g1_i1	30
TR27013|c0_g1_i4	66
TR27019|c2_g1_i1	114
TR27019|c2_g1_i2	94
TR2702|c0_g1_i2	116
TR27022|c1_g3_i1	122
TR27023|c0_g1_i1	42
TR27023|c1_g1_i1	238
TR2703|c0_g1_i4	64
TR27045|c0_g2_i1	36
TR27047|c0_g1_i3	94
TR27052|c0_g2_i1	172
TR2706|c0_g1_i1	74
TR27060|c0_g1_i2	38
TR27061|c0_g1_i1	162
TR27072|c0_g2_i1	64
TR27075|c0_g2_i1	274
TR27076|c0_g1_i1	156
TR27076|c0_g1_i3	284
TR27078|c0_g2_i2	92
TR27078|c0_g2_i3	26
TR27083|c0_g1_i3	3162
TR27085|c0_g1_i1	46
TR27086|c0_g1_i1	116
TR27088|c0_g1_i1	530
TR2709|c0_g2_i1	90
TR2709|c0_g3_i3	96
TR2709|c0_g3_i4	38
TR27095|c0_g1_i2	50
TR27096|c0_g1_i1	20
TR27100|c0_g3_i1	42
TR27103|c0_g3_i1	90
TR27104|c0_g2_i1	30
TR27107|c0_g2_i1	40
TR27117|c0_g1_i2	48
TR27118|c0_g1_i3	78
TR2712|c0_g1_i1	82
TR27123|c0_g3_i1	18
TR27127|c0_g1_i3	174
TR2713|c2_g1_i2	20
TR2713|c2_g1_i4	24
TR27130|c0_g2_i2	60
TR27136|c0_g1_i1	28
TR27136|c0_g4_i2	356
TR27141|c0_g4_i1	26
TR27153|c0_g1_i1	84
TR27161|c0_g1_i2	48
TR27162|c0_g1_i1	78
TR27162|c0_g1_i3	48
TR27167|c0_g1_i4	40
TR27181|c0_g1_i4	50
TR27187|c0_g1_i3	20
TR2719|c0_g1_i2	14
TR2719|c0_g1_i6	310
TR27197|c0_g1_i2	320
TR27200|c0_g1_i1	56
TR27201|c0_g1_i1	56
TR27201|c1_g1_i1	66
TR27202|c0_g3_i1	32
TR2722|c1_g1_i11	50
TR2722|c1_g1_i5	120
TR2722|c1_g1_i7	124
TR27221|c0_g1_i2	32
TR27226|c0_g1_i2	2486
TR27233|c0_g1_i2	80
TR27235|c0_g1_i1	160
TR27238|c0_g1_i2	58
TR27238|c0_g1_i3	142
TR2724|c0_g2_i2	56
TR27252|c0_g1_i2	56
TR27265|c1_g1_i1	72
TR2727|c0_g1_i4	82
TR27276|c0_g1_i2	86
TR27279|c1_g3_i2	72
TR27280|c0_g1_i1	60
TR27285|c0_g1_i3	24
TR27291|c0_g1_i5	26
TR27297|c2_g4_i1	28
TR2730|c0_g7_i3	12
TR27306|c0_g1_i2	58
TR27307|c1_g1_i1	82
TR27307|c1_g1_i3	86
TR2731|c0_g2_i1	72
TR2731|c0_g2_i3	192
TR2731|c0_g4_i1	32
TR27313|c0_g1_i1	52
TR27317|c1_g1_i1	108
TR27319|c0_g1_i1	32
TR2732|c1_g2_i1	70
TR2732|c2_g1_i2	12
TR2732|c2_g6_i1	30
TR27323|c1_g1_i1	42
TR2733|c1_g1_i2	84
TR2733|c1_g1_i4	44
TR27330|c0_g1_i2	20
TR27331|c0_g1_i3	50
TR27335|c1_g7_i1	54
TR27336|c0_g6_i1	18
TR27339|c0_g2_i1	22
TR2735|c0_g2_i2	14
TR27353|c0_g1_i1	248
TR27353|c0_g1_i2	74
TR2736|c0_g1_i1	648
TR27364|c0_g1_i3	144
TR27366|c0_g2_i1	184
TR27366|c0_g2_i3	370
TR27385|c0_g1_i3	62
TR27391|c0_g1_i1	18
TR27394|c0_g1_i1	126
TR27406|c1_g1_i1	48
TR27408|c0_g2_i2	80
TR2741|c1_g1_i3	26
TR27411|c0_g1_i1	2078
TR27414|c0_g3_i1	160
TR27429|c0_g1_i1	92
TR27443|c0_g1_i1	30
TR2745|c0_g4_i3	136
TR27450|c0_g2_i1	24
TR27472|c0_g1_i2	34
TR27472|c0_g1_i3	46
TR27477|c0_g1_i3	46
TR27479|c0_g1_i3	38
TR27479|c0_g1_i4	152
TR27479|c0_g4_i3	118
TR27483|c1_g1_i2	56
TR27487|c0_g2_i2	30
TR27488|c0_g1_i2	58
TR27489|c0_g1_i1	36
TR27492|c0_g1_i2	38
TR27496|c1_g2_i1	100
TR27497|c1_g2_i1	16
TR2750|c2_g2_i1	80
TR2750|c2_g3_i3	254
TR2750|c4_g14_i1	40
TR2750|c4_g3_i3	58
TR2750|c4_g3_i4	100
TR2750|c4_g3_i5	162
TR2750|c4_g3_i6	156
TR2750|c4_g7_i2	144
TR27502|c0_g1_i2	68
TR27505|c0_g1_i4	90
TR27507|c0_g1_i2	186
TR27510|c0_g1_i2	1382
TR2753|c1_g6_i3	1022
TR27535|c0_g3_i3	128
TR27544|c0_g1_i2	42
TR2755|c1_g1_i5	46
TR2755|c1_g2_i6	18
TR27550|c0_g1_i2	90
TR27554|c0_g1_i5	140
TR27558|c0_g3_i1	76
TR2756|c1_g1_i1	38
TR2756|c4_g4_i11	136
TR2756|c4_g4_i8	74
TR27560|c0_g1_i1	86
TR27561|c0_g1_i4	52
TR27563|c0_g1_i1	30
TR27563|c0_g1_i2	32
TR27570|c0_g1_i1	72
TR27576|c0_g1_i4	120
TR27587|c0_g1_i2	70
TR27590|c0_g1_i3	82
TR27590|c0_g1_i4	54
TR27590|c0_g2_i1	38
TR27591|c0_g1_i2	382
TR27599|c0_g1_i2	78
TR27599|c0_g1_i4	56
TR27607|c0_g1_i4	60
TR27612|c0_g9_i3	60
TR27612|c0_g9_i4	106
TR27614|c0_g2_i1	50
TR27615|c0_g1_i2	94
TR27616|c0_g2_i1	50
TR27618|c0_g1_i1	102
TR2762|c1_g1_i1	44
TR2762|c4_g2_i12	32
TR2762|c4_g2_i19	228
TR2762|c4_g2_i4	106
TR2762|c4_g2_i8	270
TR2762|c4_g2_i9	176
TR27627|c1_g1_i4	166
TR27627|c1_g1_i8	206
TR27627|c1_g1_i9	126
TR27628|c0_g3_i2	44
TR27630|c0_g1_i1	188
TR27633|c0_g1_i1	312
TR27633|c0_g1_i2	306
TR27639|c0_g1_i1	78
TR27639|c0_g2_i2	1580
TR27641|c1_g1_i1	80
TR27641|c1_g1_i4	34
TR27646|c0_g1_i2	202
TR2765|c0_g1_i5	46
TR27654|c0_g1_i1	16
TR27658|c0_g2_i1	48
TR27659|c0_g1_i3	56
TR2766|c0_g1_i3	144
TR27664|c0_g1_i2	22
TR27665|c0_g3_i2	178
TR2767|c1_g1_i1	56
TR2767|c1_g1_i5	38
TR2767|c1_g1_i8	84
TR27671|c0_g2_i1	130
TR27671|c0_g2_i2	216
TR27675|c0_g3_i1	72
TR27681|c0_g1_i3	100
TR27683|c0_g1_i4	22
TR27686|c0_g1_i3	38
TR27693|c0_g1_i1	74
TR27693|c0_g2_i2	32
TR2770|c0_g2_i1	240
TR27700|c0_g2_i4	92
TR27701|c0_g1_i3	24
TR27704|c0_g1_i1	88
TR27710|c0_g1_i3	42
TR27718|c0_g1_i3	48
TR27721|c0_g1_i3	54
TR27725|c0_g1_i1	120
TR27733|c0_g1_i1	32
TR27733|c0_g1_i4	36
TR27733|c0_g1_i5	28
TR27739|c0_g1_i1	88
TR27740|c0_g1_i3	60
TR27742|c0_g1_i1	34
TR27742|c0_g3_i2	20
TR27749|c0_g1_i3	128
TR27749|c0_g1_i4	142
TR27760|c0_g1_i1	64
TR27760|c0_g1_i3	48
TR27762|c0_g2_i1	26
TR27762|c0_g2_i2	58
TR27762|c0_g2_i3	90
TR27767|c0_g1_i2	32
TR27772|c0_g1_i1	22
TR27773|c0_g2_i1	28
TR27777|c0_g1_i7	224
TR27787|c0_g3_i1	70
TR2779|c0_g1_i4	32
TR27794|c0_g1_i6	58
TR27795|c0_g3_i1	44
TR27797|c4_g2_i3	158
TR27799|c0_g1_i3	30
TR2780|c0_g2_i1	88
TR27804|c0_g1_i1	58
TR27805|c0_g1_i1	40
TR27808|c0_g1_i2	24
TR27815|c2_g1_i1	440
TR27815|c2_g1_i2	72
TR27815|c2_g1_i7	306
TR27822|c0_g3_i1	68
TR27823|c0_g2_i1	708
TR27824|c4_g11_i1	208
TR27827|c0_g1_i2	188
TR27832|c0_g2_i2	54
TR27836|c0_g1_i2	94
TR27836|c0_g1_i3	62
TR27837|c0_g1_i1	80
TR2785|c0_g5_i1	44
TR2785|c0_g5_i11	34
TR27860|c0_g1_i4	146
TR27862|c0_g2_i1	34
TR27865|c0_g1_i1	16
TR27866|c0_g1_i3	44
TR27867|c0_g1_i1	194
TR27867|c0_g1_i3	86
TR2787|c2_g3_i1	58
TR2787|c2_g3_i3	46
TR2787|c2_g3_i7	46
TR27870|c0_g1_i2	122
TR27871|c0_g1_i4	30
TR27871|c0_g1_i5	34
TR27873|c0_g1_i1	188
TR27877|c0_g4_i4	36
TR27877|c0_g4_i5	38
TR27878|c1_g1_i1	34
TR27878|c3_g4_i1	66
TR27878|c3_g6_i1	82
TR27889|c0_g1_i1	264
TR27889|c0_g1_i2	154
TR2789|c1_g2_i1	180
TR2789|c1_g4_i2	40
TR27893|c0_g1_i1	82
TR27899|c0_g1_i3	120
TR27902|c0_g2_i2	32
TR27905|c0_g1_i3	42
TR27906|c0_g7_i1	40
TR27907|c0_g1_i3	662
TR27909|c0_g1_i2	258
TR27917|c0_g1_i1	16
TR2792|c1_g7_i2	476
TR27921|c0_g1_i1	62
TR27925|c1_g3_i3	56
TR27929|c0_g1_i2	84
TR2793|c0_g4_i3	3680
TR2793|c0_g5_i1	5158
TR27937|c0_g1_i2	126
TR27941|c0_g1_i1	54
TR27946|c0_g2_i3	42
TR27951|c0_g1_i3	98
TR27956|c0_g1_i1	44
TR27960|c0_g1_i4	44
TR27960|c0_g1_i5	88
TR27969|c0_g1_i1	42
TR27969|c0_g2_i1	18
TR27971|c0_g1_i1	36
TR27974|c0_g1_i2	28
TR27976|c0_g2_i5	74
TR27976|c0_g2_i7	68
TR27983|c0_g4_i1	18
TR27985|c1_g1_i1	158
TR27986|c0_g1_i3	88
TR27986|c0_g1_i4	36
TR27987|c0_g2_i4	90
TR27988|c0_g1_i3	38
TR27989|c0_g1_i2	208
TR27992|c0_g1_i7	60
TR27998|c1_g2_i1	114
TR2800|c0_g2_i2	24
TR28004|c0_g1_i6	134
TR28005|c0_g7_i1	618
TR28005|c0_g9_i1	144
TR28007|c0_g2_i1	60
TR2801|c1_g2_i2	36
TR28010|c0_g1_i2	38
TR28012|c0_g1_i2	40
TR28013|c0_g1_i2	232
TR28030|c1_g1_i2	722
TR28037|c0_g1_i5	128
TR28042|c0_g1_i3	22
TR28043|c0_g1_i2	162
TR28045|c0_g1_i1	64
TR28047|c0_g2_i3	124
TR28049|c3_g2_i4	184
TR2805|c0_g1_i1	1318
TR28050|c0_g1_i3	100
TR28051|c0_g1_i3	106
TR28051|c0_g1_i5	88
TR28054|c0_g2_i3	54
TR2806|c0_g1_i1	34
TR28062|c1_g2_i1	44
TR28062|c2_g1_i1	22
TR2807|c0_g1_i1	32
TR2807|c0_g1_i3	30
TR2807|c0_g1_i5	44
TR28071|c0_g1_i1	66
TR28077|c1_g1_i1	126
TR28084|c0_g1_i1	110
TR28084|c0_g5_i1	50
TR28085|c0_g2_i2	100
TR28086|c0_g1_i2	16
TR28091|c0_g1_i14	34
TR28096|c0_g1_i1	92
TR28100|c0_g1_i1	62
TR28105|c0_g2_i1	18
TR28108|c0_g4_i6	76
TR2811|c0_g2_i1	90
TR2811|c0_g5_i1	102
TR28120|c0_g1_i2	22
TR28123|c1_g5_i3	44
TR28125|c0_g1_i1	34
TR28127|c1_g1_i1	124
TR2813|c0_g1_i1	58
TR2813|c0_g3_i2	32
TR28132|c0_g1_i1	140
TR28133|c0_g1_i2	32
TR28134|c0_g1_i3	220
TR28138|c0_g1_i2	62
TR2814|c0_g2_i2	26
TR28168|c0_g2_i5	108
TR28170|c0_g1_i4	52
TR28172|c0_g1_i2	36
TR2818|c3_g2_i10	46
TR2818|c3_g2_i4	42
TR28195|c0_g1_i3	92
TR28197|c0_g1_i3	98
TR28199|c0_g1_i1	166
TR2820|c1_g2_i3	46
TR28204|c0_g1_i3	112
TR28206|c0_g4_i1	60
TR28209|c0_g1_i4	36
TR28215|c1_g1_i3	122
TR28217|c0_g1_i3	26
TR28219|c0_g2_i1	28
TR28220|c0_g1_i2	22
TR28224|c0_g1_i1	188
TR28224|c0_g9_i2	168
TR28226|c0_g1_i2	96
TR28227|c0_g1_i1	14
TR28227|c0_g2_i1	46
TR2823|c0_g1_i2	88
TR28231|c0_g2_i1	42
TR28231|c0_g4_i1	50
TR28233|c0_g2_i1	522
TR28234|c0_g3_i3	84
TR28236|c0_g1_i3	142
TR28237|c0_g1_i1	66
TR28239|c0_g1_i4	788
TR2824|c0_g6_i3	24
TR28240|c0_g1_i3	44
TR28243|c0_g1_i1	68
TR28249|c1_g1_i1	50
TR28249|c1_g1_i4	108
TR2825|c1_g1_i10	46
TR28252|c0_g2_i3	44
TR28252|c0_g2_i4	12
TR28255|c0_g3_i1	146
TR28255|c0_g3_i3	52
TR28256|c0_g3_i1	352
TR28265|c0_g1_i1	60
TR2827|c0_g2_i3	34
TR2827|c0_g2_i4	56
TR28270|c0_g1_i2	46
TR2828|c0_g2_i5	16
TR28282|c1_g1_i6	214
TR28284|c0_g1_i5	74
TR28284|c0_g3_i1	44
TR28285|c0_g1_i2	72
TR28286|c0_g2_i1	68
TR28286|c0_g2_i2	24
TR28286|c0_g3_i1	12
TR28287|c0_g1_i1	16
TR28288|c0_g2_i1	40
TR28291|c0_g3_i2	46
TR28295|c0_g2_i1	40
TR28299|c0_g1_i1	60
TR28301|c0_g1_i2	56
TR28301|c0_g1_i4	36
TR28303|c0_g2_i1	32
TR28303|c0_g2_i3	30
TR28311|c0_g1_i3	22
TR28314|c0_g2_i3	924
TR28318|c0_g1_i1	58
TR2832|c0_g2_i2	66
TR28321|c0_g2_i1	48
TR28325|c0_g2_i1	68
TR28325|c0_g2_i2	46
TR28330|c1_g1_i4	428
TR28334|c0_g1_i1	122
TR28335|c0_g1_i1	64
TR28338|c0_g3_i2	36
TR28341|c1_g2_i1	50
TR28347|c0_g4_i1	74
TR28348|c0_g1_i2	58
TR28350|c0_g2_i5	50
TR28351|c0_g1_i4	34
TR28352|c0_g1_i1	22
TR28356|c0_g1_i1	196
TR28356|c0_g1_i4	222
TR28356|c0_g1_i7	70
TR28357|c2_g1_i1	52
TR2836|c0_g1_i1	40
TR2836|c0_g2_i1	76
TR2836|c0_g4_i4	148
TR28368|c0_g3_i1	10
TR28370|c0_g2_i1	22
TR28371|c0_g1_i5	78
TR28374|c0_g1_i4	130
TR28390|c0_g2_i1	96
TR28394|c0_g1_i3	40
TR28396|c0_g1_i1	24
TR28396|c0_g1_i5	50
TR28399|c0_g3_i1	116
TR28404|c0_g2_i2	20
TR28405|c0_g1_i3	18
TR28407|c0_g1_i1	32
TR28407|c0_g2_i1	24
TR28407|c0_g4_i1	24
TR28408|c0_g1_i2	62
TR2841|c0_g1_i9	78
TR28411|c0_g4_i2	34
TR28415|c0_g1_i7	142
TR28417|c0_g1_i3	24
TR2842|c0_g3_i2	818
TR28420|c0_g1_i1	20
TR28422|c0_g2_i1	56
TR28425|c0_g1_i4	98
TR28426|c0_g2_i1	14
TR28427|c1_g2_i2	22
TR28428|c0_g1_i1	56
TR28431|c0_g1_i3	40
TR28446|c0_g5_i4	32
TR28447|c0_g1_i4	50
TR28448|c0_g1_i3	102
TR28448|c0_g1_i4	112
TR28449|c1_g1_i7	154
TR28452|c0_g1_i4	28
TR28457|c2_g1_i3	56
TR28459|c0_g1_i1	42
TR28460|c0_g1_i3	38
TR28470|c0_g1_i1	14
TR2848|c0_g1_i1	74
TR2848|c0_g2_i2	40
TR2849|c0_g1_i3	40
TR28493|c0_g1_i1	438
TR2850|c1_g4_i3	88
TR28526|c0_g2_i1	60
TR28530|c1_g1_i5	44
TR28530|c1_g4_i1	70
TR28534|c1_g1_i1	40
TR28545|c0_g2_i3	24
TR28548|c0_g1_i2	50
TR28549|c0_g1_i1	116
TR2855|c0_g1_i2	132
TR28550|c2_g4_i3	36
TR28554|c0_g2_i1	126
TR28554|c0_g3_i1	28
TR28555|c0_g2_i3	166
TR28558|c0_g1_i2	238
TR28566|c0_g1_i1	882
TR2857|c1_g1_i1	602
TR2857|c1_g1_i2	24
TR28579|c0_g2_i5	16
TR28588|c0_g1_i1	106
TR28591|c0_g1_i1	96
TR28604|c0_g1_i2	36
TR28605|c1_g1_i2	18
TR28608|c0_g1_i3	184
TR28614|c1_g8_i1	32
TR28615|c0_g1_i1	14
TR28616|c0_g1_i2	138
TR28616|c0_g1_i3	40
TR28616|c0_g1_i5	650
TR28617|c0_g1_i3	56
TR28619|c0_g4_i1	32
TR28620|c0_g1_i3	326
TR28620|c0_g1_i4	114
TR28620|c0_g1_i6	648
TR28621|c0_g1_i1	42
TR28622|c1_g4_i3	98
TR28624|c2_g5_i2	16
TR28626|c0_g1_i5	252
TR28627|c0_g4_i1	66
TR28633|c0_g1_i2	62
TR28633|c0_g2_i2	42
TR28634|c0_g1_i2	122
TR28650|c0_g1_i3	20
TR28656|c0_g1_i1	64
TR28660|c0_g2_i1	86
TR28665|c1_g4_i1	24
TR28665|c1_g6_i1	18
TR28665|c1_g7_i14	16
TR28668|c1_g1_i1	38
TR2867|c0_g1_i2	48
TR28671|c0_g2_i2	36
TR28678|c0_g1_i3	18
TR28693|c0_g1_i1	62
TR28693|c0_g1_i2	100
TR28693|c0_g2_i2	16
TR28694|c0_g1_i1	26
TR28695|c0_g2_i1	1278
TR2871|c1_g1_i1	70
TR28710|c0_g1_i4	36
TR28713|c0_g3_i1	26
TR28713|c0_g3_i9	20
TR28724|c0_g1_i2	360
TR28729|c0_g1_i1	18
TR2873|c0_g1_i4	146
TR28736|c1_g1_i6	138
TR28749|c0_g1_i3	44
TR28749|c0_g2_i1	22
TR2875|c0_g1_i1	118
TR28754|c0_g1_i2	114
TR28754|c0_g1_i4	28
TR28757|c0_g2_i1	36
TR28757|c0_g4_i1	54
TR28761|c1_g1_i1	134
TR28761|c1_g1_i3	214
TR28761|c1_g1_i4	196
TR28761|c1_g1_i5	46
TR28765|c0_g1_i2	68
TR28767|c0_g1_i5	70
TR28780|c0_g1_i4	62
TR28787|c0_g1_i1	120
TR28787|c0_g1_i9	68
TR28790|c0_g1_i2	36
TR28792|c0_g1_i3	34
TR28795|c0_g4_i1	82
TR28795|c0_g4_i3	90
TR28800|c0_g1_i2	42
TR28802|c2_g2_i11	300
TR28802|c2_g2_i12	154
TR28802|c2_g2_i4	216
TR28802|c2_g2_i7	170
TR28802|c2_g6_i1	48
TR28814|c0_g2_i2	28
TR28814|c0_g2_i6	132
TR28816|c1_g2_i2	28
TR28819|c0_g1_i2	66
TR28823|c1_g1_i3	40
TR28823|c1_g1_i9	36
TR28844|c1_g1_i4	78
TR28848|c1_g2_i1	50
TR28853|c0_g3_i2	224
TR28855|c0_g1_i1	260
TR28860|c0_g1_i6	52
TR28861|c0_g2_i1	28
TR28864|c0_g4_i2	18
TR28867|c1_g17_i1	44
TR28872|c0_g1_i2	198
TR28873|c0_g1_i1	474
TR28878|c2_g1_i2	64
TR28878|c2_g1_i4	138
TR28881|c0_g1_i2	82
TR28883|c0_g2_i2	24
TR28888|c0_g1_i1	70
TR28891|c0_g1_i2	74
TR28891|c0_g2_i1	24
TR28892|c0_g2_i1	246
TR28895|c0_g1_i3	196
TR28896|c0_g1_i2	68
TR28900|c0_g1_i1	100
TR28900|c0_g1_i3	40
TR28903|c0_g1_i1	36
TR28904|c0_g1_i3	52
TR28906|c0_g1_i1	44
TR2891|c0_g1_i4	726
TR28910|c1_g1_i2	90
TR28912|c0_g1_i1	88
TR28913|c0_g1_i1	78
TR28925|c0_g1_i3	182
TR28926|c0_g1_i4	46
TR28927|c0_g2_i1	226
TR28927|c0_g3_i1	142
TR28929|c1_g6_i2	180
TR28939|c0_g1_i4	50
TR28943|c0_g2_i3	66
TR28943|c0_g3_i1	130
TR28946|c0_g1_i2	104
TR28946|c0_g1_i3	54
TR28947|c0_g1_i1	72
TR28947|c1_g1_i2	24
TR28950|c0_g1_i3	34
TR28953|c2_g1_i4	730
TR2896|c1_g1_i1	136
TR2896|c1_g1_i4	756
TR2896|c1_g1_i8	1096
TR28963|c0_g1_i3	34
TR28966|c0_g1_i1	48
TR28966|c0_g2_i1	28
TR2897|c0_g1_i2	92
TR28979|c0_g1_i1	32
TR28982|c0_g2_i1	34
TR2899|c3_g3_i1	14
TR28990|c0_g1_i4	324
TR28991|c0_g1_i2	56
TR28991|c0_g3_i1	44
TR28994|c0_g1_i2	48
TR2900|c0_g1_i1	78
TR2900|c0_g2_i1	872
TR2900|c0_g2_i4	106
TR29001|c0_g4_i2	206
TR29001|c0_g4_i3	90
[truncated: 21,004 more rows]

## Sheet: OBP1_vs_AMPHID2_Differential
Transcript ID	baseMeanA( AMPHID2 )	baseMeanB( OB_P1 )	log2FoldChange( OB_P1 Vs. AMPHID2 )	pval	padj	Significant	Hit Description	Hit Organism	Family	Gene Ontology (Biological Process)	Gene Ontology (Molecular Function)	Gene Ontology (Cellular Component)	Pathway
TR2563|c0_g5_i1	293.596	27.9977	-3.39045	0.000117648	0.0508163	No	PREDICTED: macrophage migration inhibitory factor homolog isoform X2	Phoenix dactylifera	NA	NA	NA	NA	NA
TR21697|c0_g1_i1	510.042	59.7284	-3.09413	0.000119832	0.0513456	No	unnamed protein product	Coffea canephora	NA	metabolic process[GO:0008152]	GTPase activity[GO:0003924] ; GTP binding[GO:0005525]	NA	NA
TR37193|c1_g4_i1	162.871	13.0656	-3.63988	0.000121782	0.051767	No	PREDICTED: 60S ribosomal protein L7a	Sesamum indicum	NA	NA	NA	NA	NA
TR38383|c0_g3_i5	156.441	13.0656	-3.58178	0.000153367	0.0574429	No	PREDICTED: protein TIFY 7	Sesamum indicum	NA	NA	NA	NA	NA
TR8164|c0_g2_i3	175.729	14.9321	-3.55686	0.000145356	0.0560091	No	hypothetical protein M569_07782, partial	Genlisea aurea	NA	NA	NA	NA	NA
TR37848|c0_g4_i3	212.16	18.6651	-3.50674	0.000135926	0.0547383	No	NA	NA	NA	NA	NA	NA	NA
TR37231|c1_g2_i2	210.017	18.6651	-3.49209	0.000144849	0.0562182	No	putative fructose-bisphosphate aldolase protein	Solanum tuberosum	NA	glycolytic process[GO:0006096]	fructose-bisphosphate aldolase activity[GO:0004332]	NA	map00030:Pentose phosphate pathway(aldolase[ec:4.1.2.13]) ; map01130:Biosynthesis of antibiotics(aldolase[ec:4.1.2.13]) ; map00051:Fructose and mannose metabolism(aldolase[ec:4.1.2.13]) ; map00710:Carbon fixation in photosynthetic organisms(aldolase[ec:4.1.2.13]) ; map00010:Glycolysis / Gluconeogenesis(aldolase[ec:4.1.2.13]) ; map00680:Methane metabolism(aldolase[ec:4.1.2.13])
TR41900|c1_g1_i1	160.728	14.9321	-3.42813	0.000243353	0.0780478	No	PREDICTED: 2-isopropylmalate synthase A-like	Sesamum indicum	NA	NA	NA	NA	NA
TR36996|c0_g2_i1	220.732	20.5316	-3.42638	0.00016865	0.0606234	No	NA	NA	NA	NA	NA	NA	NA
TR32544|c0_g1_i4	195.016	18.6651	-3.38518	0.000227222	0.0751235	No	NA	NA	NA	NA	NA	NA	NA
TR33651|c0_g3_i1	304.311	29.8642	-3.34906	0.000127977	0.0531353	No	PREDICTED: uncharacterized protein Os08g0359500-like	Erythranthe guttatus	NA	NA	NA	NA	NA
TR27909|c0_g1_i3	317.169	31.7307	-3.3213	0.000131286	0.0536769	No	BnaAnng33460D, partial	Brassica napus	NA	NA	NA	NA	NA
TR36073|c0_g4_i4	128.582	13.0656	-3.29884	0.000436338	0.1129	No	hypothetical protein MIMGU_mgv1a012999mg	Mimulus guttatus	NA	oxidation-reduction process[GO:0055114]	protein disulfide oxidoreductase activity[GO:0015035]	NA	NA
TR35255|c2_g3_i2	237.877	24.2647	-3.29328	0.000237998	0.0777267	No	AF139466_1chlorophyll a/b binding protein CP29	Vigna radiata	NA	photosynthesis, light harvesting[GO:0009765] ; protein-chromophore linkage[GO:0018298]	metal ion binding[GO:0046872] ; chlorophyll binding[GO:0016168]	photosystem II[GO:0009523] ; integral component of membrane[GO:0016021] ; chloroplast[GO:0009507] ; photosystem I[GO:0009522]	NA
TR39282|c0_g8_i5	145.726	14.9321	-3.28677	0.000417503	0.112369	No	hypothetical protein MIMGU_mgv1a009208mg	Mimulus guttatus	NA	lysine biosynthetic process via diaminopimelate[GO:0009089] ; oxidation-reduction process[GO:0055114]	4-hydroxy-tetrahydrodipicolinate reductase[GO:0008839] ; NADPH binding[GO:0070402]	NA	map00261:Monobactam biosynthesis(reductase[ec:1.17.1.8]) ; map01130:Biosynthesis of antibiotics(reductase[ec:1.17.1.8]) ; map00300:Lysine biosynthesis(reductase[ec:1.17.1.8])
TR33604|c0_g2_i3	109.295	11.1991	-3.28677	0.000468283	0.116657	No	NA	NA	NA	NA	NA	NA	NA
TR42812|c3_g4_i5	199.302	20.5316	-3.27904	0.000315923	0.0940046	No	hypothetical protein MIMGU_mgv1a009480mg	Mimulus guttatus	NA	dephosphorylation[GO:0016311] ; carbohydrate metabolic process[GO:0005975]	fructose 1,6-bisphosphate 1-phosphatase activity[GO:0042132]	NA	map00030:Pentose phosphate pathway(hexose diphosphatase[ec:3.1.3.11]) ; map01130:Biosynthesis of antibiotics(hexose diphosphatase[ec:3.1.3.11]) ; map00051:Fructose and mannose metabolism(hexose diphosphatase[ec:3.1.3.11]) ; map00710:Carbon fixation in photosynthetic organisms(hexose diphosphatase[ec:3.1.3.11]) ; map00010:Glycolysis / Gluconeogenesis(hexose diphosphatase[ec:3.1.3.11]) ; map00680:M…
TR29828|c3_g4_i3	214.303	22.3982	-3.2582	0.000310539	0.0939688	No	beta-tubulin, partial	Ammopiptanthus mongolicus	NA	microtubule-based process[GO:0007017]	structural constituent of cytoskeleton[GO:0005200] ; GTP binding[GO:0005525]	microtubule[GO:0005874]	NA
TR32240|c0_g7_i3	107.152	11.1991	-3.2582	0.000510047	0.121956	No	PREDICTED: leucine-rich repeat extensin-like protein 6	Erythranthe guttatus	NA	NA	NA	NA	NA
TR35316|c0_g5_i1	210.017	22.3982	-3.22906	0.000351305	0.101708	No	PREDICTED: proteasome subunit beta type-4-like	Sesamum indicum	NA	NA	NA	NA	NA
TR42827|c0_g1_i4	122.153	13.0656	-3.22484	0.00056062	0.129426	No	PREDICTED: pentatricopeptide repeat-containing protein At2g31400, chloroplastic	Sesamum indicum	NA	NA	NA	NA	NA
TR4072|c0_g1_i2	173.586	18.6651	-3.21723	0.000445001	0.114039	No	PREDICTED: transcription factor DIVARICATA	Sesamum indicum	NA	NA	NA	NA	NA
TR35025|c0_g4_i9	188.587	20.5316	-3.19931	0.000435551	0.113243	No	hypothetical protein MIMGU_mgv1a010790mg	Mimulus guttatus	NA	NA	NA	NA	NA
TR41734|c2_g1_i1	188.587	20.5316	-3.19931	0.000435551	0.113796	No	PREDICTED: transcription factor bHLH130-like	Sesamum indicum	NA	NA	NA	NA	NA
TR29917|c0_g2_i1	171.443	18.6651	-3.19931	0.000477315	0.117811	No	PREDICTED: dammarenediol II synthase-like	Sesamum indicum	NA	NA	NA	NA	NA
TR41253|c0_g1_i7	85.7213	9.33257	-3.19931	0.000560449	0.129947	No	PREDICTED: protein NRT1/ PTR FAMILY 5.10-like	Sesamum indicum	NA	NA	NA	NA	NA
TR35255|c2_g1_i1	390.032	42.9298	-3.18354	0.000149244	0.0566916	No	PREDICTED: chlorophyll a-b binding protein CP29.1, chloroplastic	Sesamum indicum	NA	NA	NA	NA	NA
TR42796|c1_g2_i1	117.867	13.0656	-3.17331	0.000663673	0.146886	No	hypothetical protein POPTR_0893s00200g, partial	Populus trichocarpa	NA	chromatin remodeling[GO:0006338] ; metabolic process[GO:0008152]	hydrolase activity, acting on acid anhydrides, in phosphorus-containing anhydrides[GO:0016818] ; DNA binding[GO:0003677] ; ATP binding[GO:0005524]	nucleus[GO:0005634]	NA
TR40055|c1_g4_i1	150.012	16.7986	-3.15867	0.000611894	0.13946	No	HMGR	Salvia miltiorrhiza	NA	coenzyme A metabolic process[GO:0015936] ; oxidation-reduction process[GO:0055114]	coenzyme binding[GO:0050662] ; hydroxymethylglutaryl-CoA reductase (NADPH) activity[GO:0004420]	NA	map01130:Biosynthesis of antibiotics(reductase (NADPH)[ec:1.1.1.34]) ; map00900:Terpenoid backbone biosynthesis(reductase (NADPH)[ec:1.1.1.34])
TR19553|c0_g1_i1	216.446	24.2647	-3.15708	0.000431231	0.113777	No	NA	NA	NA	NA	NA	NA	NA
TR40722|c0_g9_i1	81.4353	9.33257	-3.12531	0.000679232	0.148488	No	PREDICTED: probable N-acetyl-gamma-glutamyl-phosphate reductase, chloroplastic	Sesamum indicum	NA	NA	NA	NA	NA
TR42850|c0_g4_i8	128.582	14.9321	-3.1062	0.000795231	0.160122	No	PREDICTED: scarecrow-like protein 13	Sesamum indicum	NA	NA	NA	NA	NA
TR37554|c0_g9_i3	289.31	33.5972	-3.1062	0.000336625	0.0990639	No	PREDICTED: NAD(P)H-quinone oxidoreductase subunit M, chloroplastic	Sesamum indicum	NA	NA	NA	NA	NA
TR40887|c0_g5_i1	96.4365	11.1991	-3.1062	0.000793141	0.160304	No	PREDICTED: cytochrome P450 77A1-like	Nicotiana tomentosiformis	NA	NA	NA	NA	NA
TR43864|c1_g7_i3	304.311	35.4637	-3.10113	0.000315886	0.0945187	No	PREDICTED: galactinol--sucrose galactosyltransferase	Sesamum indicum	NA	NA	NA	NA	NA
TR40005|c0_g2_i2	272.165	31.7307	-3.10053	0.000378322	0.105536	No	NA	NA	NA	NA	NA	NA	NA
TR41456|c2_g1_i3	480.04	55.9954	-3.09977	0.000132949	0.0539451	No	PREDICTED: phospho-2-dehydro-3-deoxyheptonate aldolase 2, chloroplastic	Sesamum indicum	NA	NA	NA	NA	NA
TR43378|c3_g3_i1	143.583	16.7986	-3.09547	0.000771753	0.156572	No	cullin 1C	Nicotiana tabacum	NA	ubiquitin-dependent protein catabolic process[GO:0006511]	ubiquitin protein ligase binding[GO:0031625]	cullin-RING ubiquitin ligase complex[GO:0031461]	NA
TR42812|c3_g4_i4	158.584	18.6651	-3.08683	0.000734804	0.155558	No	hypothetical protein MIMGU_mgv1a009480mg	Mimulus guttatus	NA	dephosphorylation[GO:0016311] ; carbohydrate metabolic process[GO:0005975]	fructose 1,6-bisphosphate 1-phosphatase activity[GO:0042132]	NA	map00030:Pentose phosphate pathway(hexose diphosphatase[ec:3.1.3.11]) ; map01130:Biosynthesis of antibiotics(hexose diphosphatase[ec:3.1.3.11]) ; map00051:Fructose and mannose metabolism(hexose diphosphatase[ec:3.1.3.11]) ; map00710:Carbon fixation in photosynthetic organisms(hexose diphosphatase[ec:3.1.3.11]) ; map00010:Glycolysis / Gluconeogenesis(hexose diphosphatase[ec:3.1.3.11]) ; map00680:M…
TR34695|c2_g8_i1	173.586	20.5316	-3.07973	0.00069519	0.150746	No	PREDICTED: REF/SRPP-like protein At3g05500	Sesamum indicum	NA	NA	NA	NA	NA
TR30674|c0_g1_i3	441.465	52.2624	-3.07845	0.000173154	0.061014	No	PREDICTED: methyl-CpG-binding domain-containing protein 11	Sesamum indicum	NA	NA	NA	NA	NA
TR44383|c4_g1_i2	282.88	33.5972	-3.07378	0.000391543	0.108098	No	PREDICTED: protein argonaute 4	Sesamum indicum	NA	NA	NA	NA	NA
TR3414|c0_g2_i2	141.44	16.7986	-3.07378	0.000834628	0.164348	No	PREDICTED: calmodulin	Vitis vinifera	NA	NA	calcium ion binding[GO:0005509]	NA	NA
TR33648|c0_g1_i2	171.443	20.5316	-3.06181	0.00074476	0.155211	No	PREDICTED: 60S ribosomal protein L21-1	Sesamum indicum	NA	NA	NA	NA	NA
TR34379|c0_g4_i12	5409.02	655.146	-3.04548	0.000122179	0.0515268	No	NA	NA	NA	NA	NA	NA	NA
TR28695|c0_g3_i1	321.455	39.1968	-3.03581	0.000366852	0.103414	No	NA	NA	NA	NA	NA	NA	NA
TR32554|c0_g2_i1	289.31	35.4637	-3.0282	0.000444587	0.114481	No	PREDICTED: E3 ubiquitin-protein ligase RING1-like	Sesamum indicum	NA	NA	NA	NA	NA
TR23728|c0_g2_i1	441.465	54.1289	-3.02783	0.000211529	0.0708093	No	PREDICTED: histone H3.3-like, partial	Phoenix dactylifera	NA	NA	NA	NA	NA
TR2653|c2_g1_i6	167.157	20.5316	-3.02528	0.000856072	0.16734	No	PREDICTED: uncharacterized protein LOC105158286	Sesamum indicum	NA	NA	NA	NA	NA
TR41203|c2_g5_i3	529.329	65.328	-3.01839	0.000152545	0.0575374	No	PREDICTED: ATP-dependent zinc metalloprotease FtsH-like	Brassica oleracea var. oleracea	NA	NA	ATP binding[GO:0005524]	integral component of membrane[GO:0016021]	NA
TR36187|c0_g3_i11	287.166	35.4637	-3.01747	0.000467148	0.117467	No	PREDICTED: 20 kDa chaperonin, chloroplastic-like	Sesamum indicum	NA	NA	NA	NA	NA
TR34788|c0_g2_i3	315.026	39.1968	-3.00666	0.000420995	0.112182	No	hypothetical protein MIMGU_mgv1a013310mg	Mimulus guttatus	NA	NA	NA	NA	NA
TR41447|c3_g1_i1	270.022	33.5972	-3.00666	0.000532195	0.12557	No	NA	NA	NA	NA	NA	NA	NA
TR8143|c2_g1_i3	135.011	16.7986	-3.00666	0.00105866	0.185907	No	PREDICTED: photosystem II core complex proteins psbY, chloroplastic-like	Sesamum indicum	NA	NA	NA	NA	NA
TR40960|c1_g2_i5	445.751	55.9954	-2.99286	0.000238075	0.0772806	No	GDS_OCIBARecName: Full=Germacrene-D synthase; AltName: Full=(-)-germacrene D synthase	Ocimum basilicum	Lamiaceae	terpenoid biosynthetic process[GO:0016114]	magnesium ion binding[GO:0000287] ; terpene synthase activity[GO:0010333]	NA	NA
TR38105|c0_g4_i1	117.867	14.9321	-2.98067	0.00120594	0.199352	No	PREDICTED: myb family transcription factor APL-like	Sesamum indicum	NA	NA	NA	NA	NA
TR3259|c0_g1_i1	308.597	39.1968	-2.97692	0.000483831	0.118329	No	NA	NA	NA	NA	NA	NA	NA
TR38105|c0_g4_i3	203.588	26.1312	-2.96181	0.000885656	0.171248	No	PREDICTED: myb family transcription factor APL-like	Sesamum indicum	NA	NA	NA	NA	NA
TR42643|c1_g5_i1	130.725	16.7986	-2.96012	0.00124337	0.201802	No	PREDICTED: transcription factor bHLH143-like	Sesamum indicum	NA	NA	NA	NA	NA
TR32043|c3_g12_i1	677.199	87.7261	-2.9485	0.000141477	0.055717	No	PREDICTED: ADP-ribosylation factor 1 isoform X1	Sesamum indicum	NA	NA	NA	NA	NA
TR3739|c2_g1_i1	100.723	13.0656	-2.94654	0.00132089	0.20931	No	PREDICTED: 1-aminocyclopropane-1-carboxylate oxidase 5-like	Sesamum indicum	NA	NA	NA	NA	NA
TR33116|c0_g1_i1	244.306	31.7307	-2.94474	0.000757455	0.154845	No	PREDICTED: peptide methionine sulfoxide reductase A1-like	Nicotiana tomentosiformis	NA	NA	NA	NA	NA
TR38235|c0_g1_i9	143.583	18.6651	-2.94347	0.00124363	0.201235	No	NA	NA	NA	NA	NA	NA	NA
TR43239|c2_g5_i2	229.305	29.8642	-2.94078	0.00083172	0.164989	No	PREDICTED: endoglucanase 25-like	Sesamum indicum	NA	NA	NA	NA	NA
TR19435|c0_g1_i1	128.582	16.7986	-2.93627	0.0013484	0.211171	No	hypothetical protein EUGRSUZ_K015082, partial	Eucalyptus grandis	NA	methionine biosynthetic process[GO:0009086] ; methylation[GO:0032259]	zinc ion binding[GO:0008270] ; 5-methyltetrahydropteroyltriglutamate-homocysteine S-methyltransferase activity[GO:0003871]	NA	map00450:Selenocompound metabolism(S-methyltransferase[ec:2.1.1.14]) ; map00270:Cysteine and methionine metabolism(S-methyltransferase[ec:2.1.1.14])
TR3710|c3_g1_i1	242.163	31.7307	-2.93202	0.000800003	0.16048	No	PREDICTED: probable serine incorporator	Sesamum indicum	NA	NA	NA	NA	NA
TR29043|c0_g4_i4	383.603	50.3959	-2.92824	0.000408144	0.110405	No	hypothetical protein MIMGU_mgv1a015384mg	Mimulus guttatus	NA	NA	NA	NA	NA
TR2346|c2_g3_i6	113.581	14.9321	-2.92723	0.00142847	0.216127	No	unknown	Glycine max	NA	translation[GO:0006412]	structural constituent of ribosome[GO:0003735]	small ribosomal subunit[GO:0015935]	NA
TR3151|c0_g4_i1	4487.51	591.685	-2.92302	0.000165641	0.0603519	No	unnamed protein product	Coffea canephora	NA	NA	NA	NA	NA
TR22792|c0_g1_i1	141.44	18.6651	-2.92177	0.00134334	0.210996	No	isopentyl pyrophosphate isomerase	Picrorhiza kurrooa	NA	isoprenoid biosynthetic process[GO:0008299]	hydrolase activity[GO:0016787] ; isopentenyl-diphosphate delta-isomerase activity[GO:0004452]	chloroplast[GO:0009507]	map01130:Biosynthesis of antibiotics(Delta-isomerase[ec:5.3.3.2]) ; map00900:Terpenoid backbone biosynthesis(Delta-isomerase[ec:5.3.3.2])
TR41465|c0_g8_i1	197.159	26.1312	-2.91552	0.00106348	0.186143	No	PREDICTED: probable transporter mch1	Sesamum indicum	NA	NA	NA	NA	NA
TR29803|c1_g6_i2	632.195	83.9931	-2.91203	0.000181293	0.0630523	No	PREDICTED: 17.8 kDa class I heat shock protein-like	Sesamum indicum	NA	NA	NA	NA	NA
TR34522|c0_g1_i4	306.454	41.0633	-2.89975	0.000644627	0.144461	No	PREDICTED: putative nuclease HARBI1	Sesamum indicum	NA	NA	NA	NA	NA
TR37233|c0_g4_i4	207.874	27.9977	-2.89233	0.0010903	0.188986	No	NA	NA	NA	NA	NA	NA	NA
TR31786|c1_g4_i7	180.015	24.2647	-2.89119	0.00124065	0.201973	No	PREDICTED: 40S ribosomal protein S15a	Musa acuminata subsp. malaccensis	NA	NA	NA	NA	NA
TR30786|c0_g1_i11	152.155	20.5316	-2.88962	0.00141632	0.215507	No	1-deoxy-D-xylulose 5-phosphate synthase	Plectranthus barbatus	Lamiaceae	terpenoid biosynthetic process[GO:0016114]	1-deoxy-D-xylulose-5-phosphate synthase activity[GO:0008661]	NA	map00730:Thiamine metabolism(synthase[ec:2.2.1.7]) ; map01130:Biosynthesis of antibiotics(synthase[ec:2.2.1.7]) ; map00900:Terpenoid backbone biosynthesis(synthase[ec:2.2.1.7])
TR33256|c0_g1_i2	537.901	72.794	-2.88545	0.000257181	0.0815066	No	PREDICTED: 60S acidic ribosomal protein P0	Sesamum indicum	NA	NA	NA	NA	NA
TR30052|c2_g3_i1	482.183	65.328	-2.88381	0.000314848	0.0947374	No	hypothetical protein MIMGU_mgv1a015998mg	Mimulus guttatus	NA	photosynthesis[GO:0015979]	NA	photosystem I reaction center[GO:0009538]	NA
TR29968|c0_g1_i3	233.591	31.7307	-2.88003	0.000997281	0.181066	No	NA	NA	NA	NA	NA	NA	NA
TR34275|c0_g1_i1	548.617	74.6605	-2.87738	0.00025736	0.0810835	No	PREDICTED: ferredoxin--NADP reductase, leaf isozyme, chloroplastic isoform 1	Glycine max	NA	NA	NA	NA	NA
TR34695|c2_g7_i1	218.589	29.8642	-2.87173	0.0011067	0.19121	No	PREDICTED: REF/SRPP-like protein At3g05500	Erythranthe guttatus	NA	NA	NA	NA	NA
TR31771|c0_g1_i2	668.626	91.4591	-2.87	0.000202541	0.0686588	No	PREDICTED: uncharacterized protein LOC105176273	Sesamum indicum	NA	NA	NA	NA	NA
TR29001|c0_g4_i4	162.871	22.3982	-2.86227	0.00146974	0.220502	No	PREDICTED: FRIGIDA-like protein 3	Sesamum indicum	NA	NA	NA	NA	NA
TR4018|c1_g5_i9	310.74	42.9298	-2.85566	0.000739578	0.154734	No	PREDICTED: eukaryotic translation initiation factor 1A	Nelumbo nucifera	NA	NA	NA	NA	NA
TR31798|c0_g2_i3	415.748	57.8619	-2.84503	0.000483022	0.118673	No	PREDICTED: plasminogen activator inhibitor 1 RNA-binding protein-like isoform X1	Sesamum indicum	NA	NA	NA	NA	NA
TR8118|c1_g2_i1	2359.48	328.506	-2.84448	0.00013721	0.054843	No	hypothetical protein MIMGU_mgv1a001909mg	Mimulus guttatus	NA	proteolysis[GO:0006508]	serine-type endopeptidase activity[GO:0004252]	NA	NA
TR32214|c0_g3_i4	160.728	22.3982	-2.84316	0.00157659	0.229463	No	PREDICTED: uncharacterized protein LOC105168194 isoform X1	Sesamum indicum	NA	NA	NA	NA	NA
TR41462|c0_g4_i4	495.041	69.061	-2.8416	0.000355254	0.101751	No	PREDICTED: receptor-like protein kinase FERONIA	Sesamum indicum	NA	NA	NA	NA	NA
TR28049|c1_g1_i2	347.171	48.5293	-2.83872	0.000671207	0.147335	No	AF212157_1S-adenosylhomocysteine hydrolase	Allium cepa	NA	one-carbon metabolic process[GO:0006730]	adenosylhomocysteinase activity[GO:0004013]	NA	map00270:Cysteine and methionine metabolism(S-adenosylhomocysteine synthase[ec:3.3.1.1])
TR36861|c1_g2_i6	786.493	110.124	-2.8363	0.000195185	0.0674459	No	chalcone synthase	Agastache rugosa	Lamiaceae	biosynthetic process[GO:0009058]	transferase activity, transferring acyl groups other than amino-acyl groups[GO:0016747]	NA	NA
TR41947|c0_g6_i1	291.453	41.0633	-2.82734	0.000893931	0.170388	No	PREDICTED: serine carboxypeptidase-like	Sesamum indicum	NA	NA	NA	NA	NA
TR42013|c1_g2_i1	171.443	24.2647	-2.8208	0.0016137	0.232338	No	PREDICTED: protein BPS1, chloroplastic-like	Sesamum indicum	NA	NA	NA	NA	NA
TR38123|c3_g5_i3	447.894	63.4614	-2.81921	0.000465396	0.118136	No	PREDICTED: fumarylacetoacetase	Sesamum indicum	NA	NA	NA	NA	NA
TR41929|c2_g1_i2	1658.71	235.181	-2.81822	0.000139924	0.0555136	No	PREDICTED: transcription factor MYC2	Sesamum indicum	NA	NA	NA	NA	NA
TR31573|c1_g4_i1	499.327	70.9275	-2.81557	0.000388352	0.107773	No	hypothetical protein MIMGU_mgv1a014049mg	Mimulus guttatus	NA	NA	NA	NA	NA
TR35078|c0_g8_i1	105.009	14.9321	-2.81402	0.00201379	0.257419	No	PREDICTED: deoxyuridine 5'-triphosphate nucleotidohydrolase-like	Sesamum indicum	NA	NA	NA	NA	NA
TR29717|c0_g1_i1	1442.26	205.316	-2.81241	0.000145821	0.0557869	No	hypothetical protein MIMGU_mgv1a013771mg	Mimulus guttatus	NA	NA	NA	NA	NA
TR28049|c2_g1_i2	1165.81	166.12	-2.81104	0.000159256	0.0588259	No	PREDICTED: adenosylhomocysteinase-like	Populus euphratica	NA	NA	NA	NA	NA
TR37979|c0_g5_i1	353.601	50.3959	-2.81074	0.00072288	0.154253	No	NA	NA	NA	NA	NA	NA	NA
TR32984|c0_g6_i1	130.725	18.6651	-2.80812	0.00198982	0.25805	No	Acyl Carrier Protein	Salvia miltiorrhiza	NA	fatty acid biosynthetic process[GO:0006633]	NA	NA	NA
TR41088|c0_g4_i1	130.725	18.6651	-2.80812	0.00198982	0.258676	No	acetyl-CoA C-acetyltransferase	Panax notoginseng	NA	metabolic process[GO:0008152]	transferase activity, transferring acyl groups other than amino-acyl groups[GO:0016747]	NA	NA
TR40433|c1_g1_i7	285.023	41.0633	-2.79516	0.00103084	0.18282	No	PREDICTED: protein NRT1/ PTR FAMILY 5.10-like	Sesamum indicum	NA	NA	NA	NA	NA
TR40235|c0_g5_i3	308.597	44.7963	-2.78427	0.000962106	0.178306	No	PREDICTED: uncharacterized protein LOC104098400	Nicotiana tomentosiformis	NA	NA	NA	NA	NA
TR35488|c0_g1_i1	77.1492	11.1991	-2.78427	0.00189649	0.254576	No	NA	NA	NA	NA	NA	NA	NA
TR34532|c0_g1_i1	141.44	20.5316	-2.78427	0.0020598	0.258974	No	PREDICTED: polyadenylate-binding protein RBP45-like	Sesamum indicum	NA	NA	NA	NA	NA
TR40412|c0_g3_i3	90.0074	13.0656	-2.78427	0.00209649	0.260529	No	PREDICTED: DEAD-box ATP-dependent RNA helicase 38	Sesamum indicum	NA	NA	NA	NA	NA
TR32416|c0_g1_i2	115.724	16.7986	-2.78427	0.00221448	0.266533	No	NA	NA	NA	NA	NA	NA	NA
TR35336|c1_g5_i6	306.454	44.7963	-2.77422	0.00100628	0.181468	No	PREDICTED: cytochrome P450 71A1-like	Erythranthe guttatus	NA	NA	NA	NA	NA
TR36010|c1_g3_i2	267.879	39.1968	-2.77278	0.00120784	0.198441	No	PREDICTED: reticulon-like protein B2 isoform X1	Sesamum indicum	NA	NA	NA	NA	NA
TR3641|c0_g1_i5	471.467	69.061	-2.77122	0.000511867	0.121847	No	hypothetical protein MIMGU_mgv1a014011mg	Mimulus guttatus	NA	NA	NA	NA	NA
TR43830|c0_g8_i1	190.73	27.9977	-2.76815	0.00176519	0.248798	No	hypothetical protein MIMGU_mgv1a019845mg	Mimulus guttatus	NA	NA	NA	NA	NA
TR41462|c0_g8_i3	165.014	24.2647	-2.76566	0.00197569	0.259995	No	PREDICTED: receptor-like protein kinase FERONIA	Sesamum indicum	NA	NA	NA	NA	NA
TR37065|c3_g2_i3	1738	255.712	-2.76483	0.000181264	0.0634542	No	PREDICTED: cytochrome P450 CYP72A219-like	Sesamum indicum	NA	NA	NA	NA	NA
TR37419|c0_g7_i1	152.155	22.3982	-2.76409	0.00209793	0.259504	No	NA	NA	NA	NA	NA	NA	NA
TR44200|c0_g1_i1	152.155	22.3982	-2.76409	0.00209793	0.260104	No	argonaute 2	Salvia miltiorrhiza	NA	NA	nucleic acid binding[GO:0003676]	NA	NA
TR33283|c0_g1_i3	619.337	91.4591	-2.75952	0.000356576	0.101586	No	PREDICTED: uncharacterized protein LOC105168965	Sesamum indicum	NA	NA	NA	NA	NA
TR40105|c0_g3_i1	366.459	54.1289	-2.75918	0.000825603	0.164384	No	PREDICTED: tryptophan synthase beta chain 1	Erythranthe guttatus	NA	NA	NA	NA	NA
TR3024|c0_g1_i1	315.026	46.6628	-2.75512	0.00103751	0.183397	No	PREDICTED: 1-aminocyclopropane-1-carboxylate oxidase 5-like	Sesamum indicum	NA	NA	NA	NA	NA
TR42297|c2_g2_i2	503.613	74.6605	-2.7539	0.000489685	0.118677	No	Os06g0133800, partial	Oryza sativa Japonica Group	NA	NA	NA	NA	NA
TR41443|c2_g1_i2	100.723	14.9321	-2.7539	0.00239736	0.276134	No	PREDICTED: peptide-N4-(N-acetyl-beta-glucosaminyl)asparagine amidase A-like	Sesamum indicum	NA	NA	NA	NA	NA
TR43228|c0_g1_i1	100.723	14.9321	-2.7539	0.00239736	0.275542	No	PREDICTED: uncharacterized protein LOC105163678	Sesamum indicum	NA	NA	NA	NA	NA
TR7709|c1_g9_i1	263.593	39.1968	-2.74951	0.00133449	0.210221	No	PREDICTED: squamosa promoter-binding-like protein 9	Sesamum indicum	NA	NA	NA	NA	NA
TR38134|c1_g1_i4	87.8644	13.0656	-2.74951	0.00230888	0.272988	No	NA	NA	NA	NA	NA	NA	NA
TR38242|c0_g2_i4	87.8644	13.0656	-2.74951	0.00230888	0.272387	No	PREDICTED: geranylgeranyl pyrophosphate synthase, chloroplastic-like	Sesamum indicum	NA	NA	NA	NA	NA
TR34788|c0_g5_i2	250.735	37.3303	-2.74775	0.00142756	0.216601	No	PREDICTED: uncharacterized protein LOC105155796	Sesamum indicum	NA	NA	NA	NA	NA
TR43167|c0_g9_i3	237.877	35.4637	-2.7458	0.00152861	0.225544	No	PREDICTED: pheophytinase, chloroplastic	Sesamum indicum	NA	NA	NA	NA	NA
TR28256|c0_g4_i1	760.777	113.857	-2.74025	0.000308489	0.0944153	No	PREDICTED: photosystem II reaction center W protein, chloroplastic-like	Nicotiana sylvestris	NA	NA	NA	NA	NA
TR36690|c0_g1_i5	672.913	100.792	-2.73904	0.000353374	0.101757	No	PREDICTED: probable carotenoid cleavage dioxygenase 4, chloroplastic	Sesamum indicum	NA	NA	NA	NA	NA
TR28903|c0_g7_i4	608.622	91.4591	-2.73435	0.000404702	0.110591	No	hypothetical protein CICLE_v10004755mg	Citrus clementina	NA	microtubule-based process[GO:0007017] ; metabolic process[GO:0008152]	structural constituent of cytoskeleton[GO:0005200] ; GTP binding[GO:0005525] ; GTPase activity[GO:0003924]	microtubule[GO:0005874]	NA
TR39756|c1_g4_i4	285.023	42.9298	-2.73103	0.00128706	0.206392	No	NA	NA	NA	NA	NA	NA	NA
TR36123|c0_g2_i2	272.165	41.0633	-2.72856	0.00137665	0.213719	No	PREDICTED: uncharacterized protein DDB_G0290685	Sesamum indicum	NA	NA	NA	NA	NA
TR43209|c1_g7_i3	259.307	39.1968	-2.72585	0.00147538	0.22073	No	PREDICTED: probable clathrin assembly protein At4g32285	Sesamum indicum	NA	NA	NA	NA	NA
TR44720|c1_g5_i1	197.159	29.8642	-2.72287	0.0019879	0.259055	No	BnaA03g42230D	Brassica napus	NA	metabolic process[GO:0008152] ; microtubule-based movement[GO:0007018]	microtubule motor activity[GO:0003777]	kinesin complex[GO:0005871]	NA
TR37844|c0_g5_i1	98.5795	14.9321	-2.72287	0.00262039	0.285841	No	hypothetical protein MIMGU_mgv1a004824mg	Mimulus guttatus	NA	proteolysis[GO:0006508]	serine-type carboxypeptidase activity[GO:0004185]	NA	NA
TR32176|c0_g1_i3	184.301	27.9977	-2.71868	0.00212198	0.261272	No	hypothetical protein B456_002G198900	Gossypium raimondii	NA	transport[GO:0006810]	transporter activity[GO:0005215]	integral component of membrane[GO:0016021]	NA
TR36925|c0_g3_i1	184.301	27.9977	-2.71868	0.00212198	0.260672	No	NA	NA	NA	NA	NA	NA	NA
TR32707|c0_g3_i1	135.011	20.5316	-2.71716	0.00259409	0.284712	No	hypothetical protein MIMGU_mgv1a016187mg	Mimulus guttatus	NA	NA	NA	NA	NA
TR40722|c0_g2_i1	85.7213	13.0656	-2.71388	0.00254611	0.282924	No	NA	NA	NA	NA	NA	NA	NA
TR28626|c0_g1_i2	317.169	48.5293	-2.70832	0.00121334	0.198736	No	PREDICTED: GDSL esterase/lipase APG	Sesamum indicum	NA	NA	NA	NA	NA
TR7892|c0_g1_i2	267.879	41.0633	-2.70566	0.00151793	0.225209	No	NA	NA	NA	NA	NA	NA	NA
TR38149|c0_g1_i3	145.726	22.3982	-2.70181	0.00261274	0.286173	No	PREDICTED: uncharacterized protein LOC105172718 isoform X3	Sesamum indicum	NA	NA	NA	NA	NA
TR41203|c2_g3_i2	205.731	31.7307	-2.69681	0.0020835	0.260122	No	NA	NA	NA	NA	NA	NA	NA
TR28310|c2_g1_i4	132.868	20.5316	-2.69407	0.00280412	0.299181	No	PREDICTED: LOW QUALITY PROTEIN: expansin-A10-like	Sesamum indicum	NA	NA	NA	NA	NA
TR44688|c0_g1_i4	229.305	35.4637	-2.69285	0.00189621	0.255178	No	PREDICTED: LOW QUALITY PROTEIN: translocase of chloroplast 159, chloroplastic, partial	Sesamum indicum	NA	NA	NA	NA	NA
TR36865|c0_g5_i1	636.481	98.9252	-2.68571	0.000471288	0.116862	No	PREDICTED: chlorophyllase-1-like	Sesamum indicum	NA	NA	NA	NA	NA
TR37162|c0_g4_i5	240.02	37.3303	-2.68474	0.00185293	0.253818	No	PREDICTED: thaumatin-like protein	Sesamum indicum	NA	NA	NA	NA	NA
TR30537|c1_g4_i5	83.5783	13.0656	-2.67736	0.00281131	0.298758	No	NA	NA	NA	NA	NA	NA	NA
TR44224|c3_g2_i1	107.152	16.7986	-2.67324	0.00311089	0.31497	No	PREDICTED: probable serine/threonine-protein kinase At1g54610	Sesamum indicum	NA	NA	NA	NA	NA
TR35247|c1_g10_i4	282.88	44.7963	-2.65874	0.00166526	0.238479	No	NA	NA	NA	NA	NA	NA	NA
TR39127|c1_g1_i4	235.734	37.3303	-2.65874	0.00205912	0.259498	No	NA	NA	NA	NA	NA	NA	NA
TR41841|c1_g2_i3	188.587	29.8642	-2.65874	0.00252683	0.283132	No	putative Na+ dependent ileal bile acid transporter	Arabidopsis thaliana	NA	NA	NA	NA	NA
TR43959|c1_g1_i3	165.014	26.1312	-2.65874	0.00276288	0.29596	No	hypothetical protein MIMGU_mgv1a001748mg	Mimulus guttatus	NA	proteolysis[GO:0006508]	serine-type endopeptidase activity[GO:0004252]	NA	NA
TR43627|c0_g14_i1	141.44	22.3982	-2.65874	0.00303181	0.313482	No	hypothetical protein MIMGU_mgv1a004747mg	Mimulus guttatus	NA	methylation[GO:0032259]	methyltransferase activity[GO:0008168]	integral component of membrane[GO:0016021]	NA
TR39005|c0_g6_i1	94.2935	14.9321	-2.65874	0.00314469	0.314821	No	PREDICTED: uncharacterized protein LOC105156918	Sesamum indicum	NA	NA	NA	NA	NA
TR3909|c1_g11_i1	94.2935	14.9321	-2.65874	0.00314469	0.315411	No	PREDICTED: 60S ribosomal protein L10a-1	Sesamum indicum	NA	NA	NA	NA	NA
TR38713|c1_g3_i2	692.2	110.124	-2.65206	0.000496459	0.119239	No	PREDICTED: 28 kDa ribonucleoprotein, chloroplastic-like	Sesamum indicum	NA	NA	NA	NA	NA
TR30017|c1_g1_i2	375.031	59.7284	-2.65052	0.00118335	0.198063	No	PREDICTED: pistil-specific extensin-like protein	Sesamum indicum	NA	NA	NA	NA	NA
TR30079|c0_g1_i1	175.729	27.9977	-2.64997	0.00272448	0.293608	No	PREDICTED: uncharacterized protein At5g39570-like	Nicotiana sylvestris	NA	NA	NA	NA	NA
TR3612|c1_g1_i3	257.164	41.0633	-2.64677	0.00194332	0.257634	No	PREDICTED: pollen-specific leucine-rich repeat extensin-like protein 1	Sesamum indicum	NA	NA	NA	NA	NA
TR26397|c1_g3_i1	338.599	54.1289	-2.64511	0.00139584	0.21483	No	Ferredoxin	Morus notabilis	NA	electron transport chain[GO:0022900]	metal ion binding[GO:0046872] ; electron carrier activity[GO:0009055] ; 2 iron, 2 sulfur cluster binding[GO:0051537]	NA	NA
TR2335|c0_g4_i1	210.017	33.5972	-2.64409	0.00242367	0.276195	No	PREDICTED: uncharacterized protein LOC105177419	Sesamum indicum	NA	NA	NA	NA	NA
TR29404|c0_g2_i4	267.879	42.9298	-2.64153	0.00188534	0.254997	No	NA	NA	NA	NA	NA	NA	NA
TR33460|c0_g5_i6	1047.94	167.986	-2.64115	0.000369528	0.103623	No	NA	NA	NA	NA	NA	NA	NA
TR42688|c0_g6_i1	81.4353	13.0656	-2.63988	0.00310806	0.31528	No	hypothetical protein MIMGU_mgv1a003163mg	Mimulus guttatus	NA	mRNA splicing, via spliceosome[GO:0000398]	NA	spliceosomal complex[GO:0005681]	NA
TR42717|c0_g3_i2	81.4353	13.0656	-2.63988	0.00310806	0.315878	No	PREDICTED: uncharacterized protein LOC105158309	Sesamum indicum	NA	NA	NA	NA	NA
TR41915|c0_g5_i1	220.732	35.4637	-2.63788	0.00235891	0.27347	No	PREDICTED: ultraviolet-B receptor UVR8 isoform X2	Sesamum indicum	NA	NA	NA	NA	NA
TR36609|c3_g4_i1	278.594	44.7963	-2.63671	0.00182856	0.252417	No	lipid transfer protein 2	Salvia miltiorrhiza	NA	lipid transport[GO:0006869]	lipid binding[GO:0008289]	NA	NA
TR29370|c0_g4_i1	347.171	55.9954	-2.63227	0.00141281	0.215584	No	60S ribosomal protein L37a	Aegilops tauschii	NA	translation[GO:0006412]	structural constituent of ribosome[GO:0003735]	ribosome[GO:0005840]	NA
TR39848|c0_g2_i1	473.61	76.527	-2.62966	0.000880444	0.170857	No	NA	NA	NA	NA	NA	NA	NA
TR32258|c0_g4_i5	207.874	33.5972	-2.6293	0.00256527	0.284463	No	PREDICTED: uncharacterized protein At5g48480	Sesamum indicum	NA	NA	NA	NA	NA
TR43167|c0_g11_i1	334.313	54.1289	-2.62673	0.00151444	0.225315	No	pheophytinase	Pyrus x bretschneideri	NA	NA	NA	NA	NA
TR2414|c0_g2_i2	402.89	65.328	-2.62461	0.00116355	0.197215	No	hypothetical protein MIMGU_mgv1a014606mg	Mimulus guttatus	NA	response to desiccation[GO:0009269]	NA	NA	NA
TR34568|c2_g1_i2	540.044	87.7261	-2.622	0.000745759	0.15422	No	NA	NA	NA	NA	NA	NA	NA
TR37115|c0_g1_i7	229.305	37.3303	-2.61885	0.00241535	0.275834	No	PREDICTED: putative glutathione-specific gamma-glutamylcyclotransferase 2	Sesamum indicum	NA	NA	NA	NA	NA
TR37193|c1_g1_i7	1086.52	177.319	-2.6153	0.000406662	0.110563	No	PREDICTED: 60S ribosomal protein L7a	Sesamum indicum	NA	NA	NA	NA	NA
TR25796|c0_g1_i1	582.905	95.1922	-2.61435	0.000698627	0.150881	No	PREDICTED: uncharacterized protein At1g04910-like	Sesamum indicum	NA	NA	NA	NA	NA
TR32795|c1_g3_i2	240.02	39.1968	-2.61435	0.00233668	0.272071	No	NA	NA	NA	NA	NA	NA	NA
TR40271|c0_g3_i1	68.5771	11.1991	-2.61435	0.00286329	0.302481	No	hypothetical protein MIMGU_mgv1a021892mg	Mimulus guttatus	NA	proteolysis[GO:0006508]	aspartic-type endopeptidase activity[GO:0004190]	NA	NA
TR36990|c0_g8_i3	250.735	41.0633	-2.61024	0.00225816	0.26937	No	hypothetical protein MIMGU_mgv1a009405mg	Mimulus guttatus	NA	NA	NA	NA	NA
TR2214|c3_g11_i1	250.735	41.0633	-2.61024	0.00225816	0.269972	No	polyubiquitin containing 7 ubiquitin monomers	Zea mays	NA	ubiquitin-dependent protein catabolic process[GO:0006511]	NA	cytoplasm[GO:0005737]	NA
TR39814|c0_g1_i2	182.158	29.8642	-2.6087	0.00303164	0.314071	No	PREDICTED: 30S ribosomal protein S11, chloroplastic	Sesamum indicum	NA	NA	NA	NA	NA
TR35626|c0_g6_i5	383.603	63.4614	-2.59566	0.001395	0.21532	No	hypothetical protein MIMGU_mgv1a005378mg	Mimulus guttatus	NA	branched-chain amino acid biosynthetic process[GO:0009082]	amino acid binding[GO:0016597] ; acetolactate synthase activity[GO:0003984]	NA	map00290:Valine, leucine and isoleucine biosynthesis(synthase[ec:2.2.1.6]) ; map01130:Biosynthesis of antibiotics(synthase[ec:2.2.1.6]) ; map00660:C5-Branched dibasic acid metabolism(synthase[ec:2.2.1.6]) ; map00650:Butanoate metabolism(synthase[ec:2.2.1.6]) ; map00770:Pantothenate and CoA biosynthesis(synthase[ec:2.2.1.6])
TR26984|c0_g1_i5	270.022	44.7963	-2.59163	0.00220882	0.266451	No	NA	NA	NA	NA	NA	NA	NA
TR18288|c0_g1_i1	996.511	166.12	-2.58466	0.000490582	0.118358	No	pathogenesis-related protein 1	Bacopa monnieri	NA	NA	NA	extracellular region[GO:0005576]	NA
TR3481|c1_g1_i4	705.058	117.59	-2.58397	0.000649903	0.144435	No	PREDICTED: zinc finger A20 and AN1 domain-containing stress-associated protein 8-like	Sesamum indicum	NA	NA	NA	NA	NA
TR44469|c1_g4_i1	55.7189	9.33257	-2.57782	0.00217954	0.264707	No	PREDICTED: K(+) efflux antiporter 2, chloroplastic-like	Nicotiana tomentosiformis	NA	NA	NA	NA	NA
TR34481|c1_g2_i8	1210.81	203.45	-2.57323	0.000467498	0.117006	No	hypothetical protein L484_022691	Morus notabilis	NA	NA	NA	NA	NA
TR35323|c3_g2_i2	310.74	52.2624	-2.57186	0.00200352	0.257953	No	PREDICTED: zinc-finger homeodomain protein 9-like	Sesamum indicum	NA	NA	NA	NA	NA
TR44383|c4_g1_i3	486.469	82.1266	-2.56643	0.00107775	0.188028	No	PREDICTED: protein argonaute 4	Sesamum indicum	NA	NA	NA	NA	NA
TR39093|c0_g2_i1	396.461	67.1945	-2.56077	0.00150636	0.224737	No	hypothetical protein MIMGU_mgv1a005332mg	Mimulus guttatus	NA	NA	transferase activity, transferring glycosyl groups[GO:0016757]	NA	NA
TR41596|c0_g1_i3	857.213	145.588	-2.55776	0.000613434	0.139218	No	PREDICTED: ornithine aminotransferase, mitochondrial	Sesamum indicum	NA	NA	NA	NA	NA
TR35982|c0_g4_i2	527.186	89.5926	-2.55686	0.000997621	0.180515	No	PREDICTED: annexin D1-like	Sesamum indicum	NA	NA	NA	NA	NA
TR2823|c0_g1_i3	295.739	50.3959	-2.55295	0.00226506	0.269593	No	hypothetical protein SETIT_0306602mg, partial	Setaria italica	NA	NA	NA	NA	NA
TR41847|c0_g8_i2	229.305	39.1968	-2.54846	0.00303444	0.312548	No	NA	NA	NA	NA	NA	NA	NA
TR31345|c0_g1_i1	272.165	46.6628	-2.54414	0.00256584	0.283939	No	PREDICTED: uncharacterized protein LOC105168504	Sesamum indicum	NA	NA	NA	NA	NA
TR37723|c0_g4_i3	336.456	57.8619	-2.53973	0.00203913	0.259419	No	PREDICTED: bifunctional L-3-cyanoalanine synthase/cysteine synthase 1, mitochondrial	Sesamum indicum	NA	NA	NA	NA	NA
TR19914|c0_g1_i1	312.883	54.1289	-2.53115	0.00228678	0.271574	No	phenylalanine ammonia lyase	Citrus sinensis	NA	metabolic process[GO:0008152]	lyase activity[GO:0016829]	NA	NA
TR37065|c3_g2_i2	398.604	69.061	-2.52901	0.00167655	0.238819	No	hypothetical protein MIMGU_mgv1a018638mg, partial	Mimulus guttatus	NA	NA	NA	NA	NA
TR42013|c1_g1_i2	405.033	70.9275	-2.51362	0.00173116	0.244646	No	PREDICTED: protein BPS1, chloroplastic-like	Sesamum indicum	NA	NA	NA	NA	NA
TR35882|c0_g1_i5	1150.81	201.583	-2.5132	0.000624645	0.141164	No	PREDICTED: 30S ribosomal protein 2, chloroplastic	Sesamum indicum	NA	NA	NA	NA	NA
TR40974|c0_g1_i3	576.476	102.658	-2.48941	0.0011705	0.197767	No	PREDICTED: uncharacterized protein LOC105155189	Sesamum indicum	NA	NA	NA	NA	NA
TR35234|c2_g1_i3	261.45	46.6628	-2.48619	0.00324755	0.321513	No	PREDICTED: probable inactive shikimate kinase like 1, chloroplastic	Sesamum indicum	NA	NA	NA	NA	NA
TR40432|c1_g2_i2	490.755	87.7261	-2.48392	0.00145955	0.219588	No	NA	NA	NA	NA	NA	NA	NA
TR35040|c0_g2_i2	323.598	57.8619	-2.48352	0.00259373	0.285257	No	PREDICTED: zinc finger A20 and AN1 domain-containing stress-associated protein 8-like isoform X1	Sesamum indicum	NA	NA	NA	NA	NA
TR31573|c1_g2_i1	1332.97	238.914	-2.48008	0.000690169	0.150266	No	NA	NA	NA	NA	NA	NA	NA
TR34205|c0_g4_i1	289.31	52.2624	-2.46877	0.00308454	0.314083	No	NA	NA	NA	NA	NA	NA	NA
TR30125|c0_g6_i1	51.4328	9.33257	-2.46234	0.00264671	0.286959	No	PREDICTED: LOW QUALITY PROTEIN: omega-hydroxypalmitate O-feruloyl transferase	Sesamum indicum	NA	NA	NA	NA	NA
TR37573|c1_g2_i4	51.4328	9.33257	-2.46234	0.00264671	0.287541	No	PREDICTED: aldehyde dehydrogenase family 3 member F1-like	Sesamum indicum	NA	NA	NA	NA	NA
TR32280|c0_g2_i2	295.739	54.1289	-2.44985	0.00320883	0.319451	No	dehydration protein	Salvia miltiorrhiza	NA	response to stress[GO:0006950] ; response to water[GO:0009415]	NA	NA	NA
TR41915|c0_g3_i3	407.176	74.6605	-2.44724	0.00218323	0.264556	No	PREDICTED: ultraviolet-B receptor UVR8 isoform X2	Sesamum indicum	NA	NA	NA	NA	NA
TR36477|c0_g3_i1	760.777	143.722	-2.4042	0.0012878	0.205894	No	hypothetical protein MIMGU_mgv1a015971mg	Mimulus guttatus	NA	actin filament depolymerization[GO:0030042]	actin binding[GO:0003779]	actin cytoskeleton[GO:0015629]	NA
TR40235|c0_g6_i2	784.35	149.321	-2.39308	0.00131748	0.209389	No	PREDICTED: uncharacterized protein LOC105159766	Sesamum indicum	NA	NA	NA	NA	NA
TR2885|c0_g1_i3	1017.94	194.117	-2.39065	0.00112977	0.193944	No	PREDICTED: LOW QUALITY PROTEIN: apyrase-like	Sesamum indicum	NA	NA	NA	NA	NA
TR38878|c1_g1_i2	587.191	111.991	-2.39045	0.00170155	0.241737	No	PREDICTED: uncharacterized protein LOC105163796	Sesamum indicum	NA	NA	NA	NA	NA
TR40323|c0_g3_i1	537.901	102.658	-2.38949	0.00186678	0.254414	No	PREDICTED: uncharacterized protein LOC104226710	Nicotiana sylvestris	NA	NA	NA	NA	NA
TR32980|c0_g8_i1	4099.62	787.669	-2.37983	0.00166714	0.238112	No	PREDICTED: LOW QUALITY PROTEIN: oxygen-evolving enhancer protein 2, chloroplastic-like	Sesamum indicum	NA	NA	NA	NA	NA
TR28990|c0_g1_i1	1585.84	309.841	-2.35565	0.00117907	0.197966	No	lipid transfer protein	Chimonanthus praecox	NA	NA	NA	NA	NA
TR41323|c0_g1_i1	1030.8	201.583	-2.35431	0.00131149	0.209057	No	PREDICTED: dynamin-related protein 4C-like	Sesamum indicum	NA	NA	NA	NA	NA
TR29268|c0_g4_i1	428.607	83.9931	-2.35131	0.00287017	0.302611	No	NA	NA	NA	NA	NA	NA	NA
TR42437|c0_g3_i6	1217.24	238.914	-2.34906	0.00125815	0.202361	No	PREDICTED: uncharacterized protein LOC105170823	Sesamum indicum	NA	NA	NA	NA	NA
TR35882|c0_g1_i3	615.051	121.323	-2.34185	0.00197531	0.260585	No	hypothetical protein LR48_Vigan05g047200	Vigna angularis	NA	NA	nucleic acid binding[GO:0003676] ; nucleotide binding[GO:0000166]	NA	NA
TR3892|c0_g1_i1	602.192	119.457	-2.33374	0.00207741	0.259968	No	PREDICTED: putative UDP-rhamnose:rhamnosyltransferase 1	Sesamum indicum	NA	NA	NA	NA	NA
TR3756|c1_g2_i2	619.337	123.19	-2.32984	0.00205832	0.260009	No	NA	NA	NA	NA	NA	NA	NA
TR36187|c0_g5_i1	533.615	106.391	-2.32642	0.00239684	0.27667	No	PREDICTED: 20 kDa chaperonin, chloroplastic-like	Sesamum indicum	NA	NA	NA	NA	NA
TR27574|c1_g1_i1	587.191	117.59	-2.32006	0.00224055	0.268465	No	PREDICTED: uncharacterized protein LOC105168700	Sesamum indicum	NA	NA	NA	NA	NA
TR3305|c1_g1_i1	784.35	158.654	-2.30562	0.00188641	0.254499	No	squamosa promoter binding protein-like 4, partial	Pogostemon cablin	Lamiaceae	NA	DNA binding[GO:0003677]	nucleus[GO:0005634]	NA
TR41323|c0_g1_i3	3771.74	774.603	-2.2837	0.00233012	0.272492	No	hypothetical protein MIMGU_mgv1a001825mg	Mimulus guttatus	NA	metabolic process[GO:0008152]	GTPase activity[GO:0003924] ; GTP binding[GO:0005525]	NA	NA
TR42285|c0_g3_i1	488.612	100.792	-2.27731	0.00317991	0.317162	No	unknown	Medicago truncatula	NA	branched-chain amino acid biosynthetic process[GO:0009082] ; oxidation-reduction process[GO:0055114]	ketol-acid reductoisomerase activity[GO:0004455]	NA	map00290:Valine, leucine and isoleucine biosynthesis(reductoisomerase (NADP+)[ec:1.1.1.86]) ; map01130:Biosynthesis of antibiotics(reductoisomerase (NADP+)[ec:1.1.1.86]) ; map00770:Pantothenate and CoA biosynthesis(reductoisomerase (NADP+)[ec:1.1.1.86])
TR43319|c1_g2_i1	720.059	149.321	-2.2697	0.00231617	0.272048	No	PREDICTED: probable galactinol--sucrose galactosyltransferase 1	Sesamum indicum	NA	NA	NA	NA	NA
TR28953|c2_g1_i1	717.916	151.188	-2.24748	0.00253542	0.282911	No	NA	NA	NA	NA	NA	NA	NA
TR28799|c0_g1_i1	623.623	132.522	-2.23444	0.00296745	0.308615	No	NA	NA	NA	NA	NA	NA	NA
TR2497|c0_g4_i1	1913.73	406.9	-2.23364	0.00206228	0.258678	No	lipid transfer protein 1	Salvia miltiorrhiza	NA	lipid transport[GO:0006869]	lipid binding[GO:0008289]	NA	NA
TR31236|c7_g2_i3	1146.52	246.38	-2.21831	0.00223398	0.268278	No	NA	NA	NA	NA	NA	NA	NA
TR41805|c1_g5_i5	1182.95	255.712	-2.2098	0.00229383	0.271808	No	elongation factor 1-alpha, partial	Lotus tenuis	NA	translational elongation[GO:0006414]	translation elongation factor activity[GO:0003746] ; GTP binding[GO:0005525] ; GTPase activity[GO:0003924]	NA	NA
TR38657|c0_g10_i1	1600.85	349.038	-2.19738	0.00233746	0.271571	No	NA	NA	NA	NA	NA	NA	NA
TR40019|c0_g2_i10	728.631	160.52	-2.18243	0.0032426	0.321618	No	hypothetical protein MIMGU_mgv1a008527mg	Mimulus guttatus	NA	tetrapyrrole biosynthetic process[GO:0033014] ; peptidyl-pyrromethane cofactor linkage[GO:0018160]	hydroxymethylbilane synthase activity[GO:0004418]	NA	map00860:Porphyrin and chlorophyll metabolism(synthase[ec:2.5.1.61])
TR41805|c1_g10_i1	979.366	216.516	-2.17738	0.00280652	0.298841	No	hypothetical protein B456_011G2412002, partial	Gossypium raimondii	NA	NA	GTP binding[GO:0005525]	NA	NA
TR2260|c0_g3_i1	1150.81	259.445	-2.14915	0.00297248	0.308539	No	PREDICTED: remorin-like	Sesamum indicum	NA	NA	NA	NA	NA
TR7842|c1_g3_i1	1371.54	309.841	-2.1462	0.00290869	0.30547	No	PREDICTED: formin-1 isoform X1	Sesamum indicum	NA	NA	NA	NA	NA
TR43940|c0_g3_i1	105.009	16.7986	-2.64409	0.00339082	0.329605	No	PREDICTED: protein STRUBBELIG-RECEPTOR FAMILY 8	Sesamum indicum	NA	NA	NA	NA	NA
TR4044|c2_g8_i1	115.724	18.6651	-2.63227	0.0035195	0.336015	No	PREDICTED: rapid alkalinization factor-like	Sesamum indicum	NA	NA	NA	NA	NA
TR8250|c2_g2_i6	115.724	18.6651	-2.63227	0.0035195	0.336615	No	PREDICTED: probable LRR receptor-like serine/threonine-protein kinase At1g63430 isoform X1	Sesamum indicum	NA	NA	NA	NA	NA
TR3382|c0_g2_i1	126.439	20.5316	-2.62252	0.00355239	0.334975	No	PREDICTED: sec-independent protein translocase protein TATA, chloroplastic-like	Sesamum indicum	NA	NA	NA	NA	NA
TR44586|c2_g3_i2	158.584	26.1312	-2.60141	0.0033852	0.329657	No	PREDICTED: LOW QUALITY PROTEIN: auxilin-related protein 2-like	Sesamum indicum	NA	NA	NA	NA	NA
TR35643|c1_g6_i1	167.157	27.9977	-2.57782	0.00352459	0.335902	No	NA	NA	NA	NA	NA	NA	NA
TR3881|c0_g3_i1	175.729	29.8642	-2.55686	0.00364716	0.338548	No	PREDICTED: copper transporter 2-like	Sesamum indicum	NA	NA	NA	NA	NA
TR40550|c0_g2_i2	186.444	31.7307	-2.55479	0.00353722	0.334724	No	NA	NA	NA	NA	NA	NA	NA
TR3151|c0_g5_i1	197.159	33.5972	-2.55295	0.00341736	0.32979	No	PREDICTED: acid phosphatase 1-like	Nicotiana sylvestris	NA	NA	NA	NA	NA
TR34695|c2_g5_i2	64.291	11.1991	-2.52124	0.00353395	0.336197	No	NA	NA	NA	NA	NA	NA	NA
TR43629|c4_g2_i2	64.291	11.1991	-2.52124	0.00353395	0.335006	No	PREDICTED: uncharacterized protein At4g22160	Sesamum indicum	NA	NA	NA	NA	NA
TR44239|c2_g1_i1	64.291	11.1991	-2.52124	0.00353395	0.3356	No	PREDICTED: spermatogenesis-associated protein 20-like isoform X1	Glycine max	NA	metabolic process[GO:0008152]	catalytic activity[GO:0003824]	NA	NA
TR3451|c0_g1_i3	237.877	42.9298	-2.47016	0.00376699	0.347264	No	hypothetical protein MIMGU_mgv1a015673mg	Mimulus guttatus	NA	intracellular protein transport[GO:0006886]	NA	integral component of membrane[GO:0016021] ; endoplasmic reticulum[GO:0005783]	NA
TR31834|c1_g1_i1	274.308	50.3959	-2.44442	0.00354107	0.334497	No	YABBY-like transcription factor GRAMINIFOLIA	Antirrhinum majus	NA	multicellular organismal development[GO:0007275]	NA	NA	NA
TR39085|c0_g6_i1	357.887	69.061	-2.37356	0.00336042	0.328438	No	hypothetical protein MIMGU_mgv1a011228mg	Mimulus guttatus	NA	nucleosome assembly[GO:0006334]	DNA binding[GO:0003677]	nucleosome[GO:0000786] ; nucleus[GO:0005634]	NA
TR33457|c0_g3_i2	456.466	93.3257	-2.29016	0.003296	0.323915	No	hypothetical protein MIMGU_mgv1a010500mg	Mimulus guttatus	NA	NA	NA	NA	NA
TR32330|c1_g1_i3	426.464	87.7261	-2.28134	0.0037065	0.342867	No	PREDICTED: phospholipase A1-IIbeta-like	Sesamum indicum	NA	NA	NA	NA	NA
TR32183|c0_g1_i2	471.467	98.9252	-2.25275	0.00362734	0.339651	No	PREDICTED: cyclin-D3-1	Sesamum indicum	NA	NA	NA	NA	NA
TR40432|c1_g2_i1	529.329	113.857	-2.21694	0.00364555	0.338985	No	PREDICTED: uncharacterized protein LOC105171616	Sesamum indicum	NA	NA	NA	NA	NA
TR43066|c2_g5_i6	3358.13	744.739	-2.17285	0.00339746	0.329652	No	PREDICTED: receptor-like protein kinase FERONIA	Sesamum indicum	NA	NA	NA	NA	NA
TR40055|c1_g2_i1	660.054	147.455	-2.16231	0.00375276	0.346548	No	HMGR	Salvia miltiorrhiza	NA	coenzyme A metabolic process[GO:0015936] ; oxidation-reduction process[GO:0055114]	coenzyme binding[GO:0050662] ; hydroxymethylglutaryl-CoA reductase (NADPH) activity[GO:0004420]	NA	map01130:Biosynthesis of antibiotics(reductase (NADPH)[ec:1.1.1.34]) ; map00900:Terpenoid backbone biosynthesis(reductase (NADPH)[ec:1.1.1.34])
TR2408|c0_g1_i5	829.354	186.651	-2.15164	0.00338211	0.329956	No	PREDICTED: nuclear transcription factor Y subunit A-10	Sesamum indicum	NA	NA	NA	NA	NA
TR41805|c1_g4_i1	1673.71	390.101	-2.10113	0.00351315	0.336609	No	AC026875_2T6D22.2	Arabidopsis thaliana	NA	NA	NA	NA	NA
TR44164|c4_g10_i5	68.5771	274.377	2.00036	0.0147216	0.645775	No	hypothetical protein MIMGU_mgv1a022389mg	Mimulus guttatus	NA	NA	NA	integral component of membrane[GO:0016021]	NA
TR34958|c0_g2_i1	10.7152	42.9298	2.00233	0.00980738	0.542088	No	PREDICTED: LOW QUALITY PROTEIN: cell division protein FtsY homolog, chloroplastic, partial	Erythranthe guttatus	NA	NA	NA	NA	NA
TR32953|c1_g6_i2	21.4303	85.8596	2.00233	0.0222364	0.738363	No	hypothetical protein MIMGU_mgv1a016563mg	Mimulus guttatus	NA	protein import into mitochondrial matrix[GO:0030150]	NA	mitochondrial inner membrane presequence translocase complex[GO:0005744]	NA
TR35498|c0_g4_i3	21.4303	85.8596	2.00233	0.0222364	0.736992	No	NA	NA	NA	NA	NA	NA	NA
TR40793|c0_g1_i4	21.4303	85.8596	2.00233	0.0222364	0.737906	No	PREDICTED: F-box/LRR-repeat protein 14	Sesamum indicum	NA	NA	NA	NA	NA
TR40939|c2_g5_i1	21.4303	85.8596	2.00233	0.0222364	0.737449	No	NA	NA	NA	NA	NA	NA	NA
TR7851|c0_g6_i1	261.45	1048.98	2.00438	0.00550358	0.421102	No	hypothetical protein M569_14824, partial	Genlisea aurea	NA	NA	organic cyclic compound binding[GO:0097159] ; heterocyclic compound binding[GO:1901363]	NA	NA
TR3571|c1_g1_i4	246.449	989.252	2.00505	0.00559883	0.425956	No	hypothetical protein MIMGU_mgv1a011768mg	Mimulus guttatus	NA	catabolic process[GO:0009056] ; macromolecule metabolic process[GO:0043170]	NA	NA	NA
TR30741|c0_g2_i1	77.1492	309.841	2.00581	0.0131784	0.616987	No	PREDICTED: chlorophyll a-b binding protein 13, chloroplastic	Sesamum indicum	NA	NA	NA	NA	NA
TR3450|c0_g5_i3	27.8594	111.991	2.00714	0.0224635	0.742222	No	PREDICTED: protein CREG1-like	Sesamum indicum	NA	NA	NA	NA	NA
TR19069|c0_g1_i1	647.196	2601.92	2.0073	0.00583351	0.435764	No	NA	NA	NA	NA	NA	NA	NA
TR7881|c1_g1_i2	72.8631	293.043	2.00785	0.0136769	0.626096	No	PREDICTED: probable receptor-like protein kinase At5g39020, partial	Erythranthe guttatus	NA	NA	NA	NA	NA
TR19514|c0_g1_i2	45.0037	181.052	2.00829	0.0189725	0.69696	No	PREDICTED: calcium-binding protein KIC-like	Sesamum indicum	NA	NA	NA	NA	NA
TR44738|c7_g2_i1	79.2922	319.174	2.00909	0.0127291	0.607097	No	PREDICTED: probable LRR receptor-like serine/threonine-protein kinase At3g47570	Sesamum indicum	NA	NA	NA	NA	NA
TR42206|c0_g3_i4	51.4328	207.183	2.01014	0.0174925	0.684866	No	PREDICTED: ethanolamine-phosphate cytidylyltransferase-like	Sesamum indicum	NA	NA	NA	NA	NA
TR20330|c0_g2_i1	17.1443	69.061	2.01014	0.0198887	0.712059	No	NA	NA	NA	NA	NA	NA	NA
TR40434|c0_g2_i5	17.1443	69.061	2.01014	0.0198887	0.712535	No	NA	NA	NA	NA	NA	NA	NA
TR38922|c0_g1_i6	276.451	1114.31	2.01105	0.00526786	0.412495	No	PREDICTED: lysM domain-containing GPI-anchored protein 2	Sesamum indicum	NA	NA	NA	NA	NA
TR31699|c0_g1_i1	152.155	614.083	2.01289	0.00697468	0.471077	No	PREDICTED: probable WRKY transcription factor 35	Sesamum indicum	NA	NA	NA	NA	NA
TR39780|c0_g7_i5	47.1467	190.384	2.01368	0.0182034	0.687085	No	NA	NA	NA	NA	NA	NA	NA
TR31876|c0_g1_i1	47.1467	190.384	2.01368	0.0182034	0.686601	No	PREDICTED: protein GDAP2 homolog	Sesamum indicum	NA	NA	NA	NA	NA
TR37914|c0_g14_i1	30.0025	121.323	2.0157	0.0216196	0.733341	No	PREDICTED: heparan-alpha-glucosaminide N-acetyltransferase isoform X2	Sesamum indicum	NA	NA	NA	NA	NA
TR35230|c2_g1_i1	370.745	1502.54	2.01891	0.00490611	0.397536	No	NA	NA	NA	NA	NA	NA	NA
TR3863|c0_g1_i2	55.7189	225.848	2.01911	0.0160945	0.663604	No	hypothetical protein MIMGU_mgv1a015081mg	Mimulus guttatus	NA	NA	calcium ion binding[GO:0005509]	NA	NA
TR34671|c0_g1_i5	55.7189	225.848	2.01911	0.0160945	0.663093	No	hypothetical protein MIMGU_mgv1a024146mg	Mimulus guttatus	NA	NA	NA	NA	NA
TR41876|c1_g1_i6	122.153	496.492	2.02308	0.00788477	0.491056	No	hypothetical protein SOVF_189280, partial	Spinacia oleracea	NA	NA	NA	NA	NA
TR36904|c0_g10_i1	12.8582	52.2624	2.02308	0.0139516	0.628468	No	hypothetical protein MIMGU_mgv1a014358mg	Mimulus guttatus	NA	small GTPase mediated signal transduction[GO:0007264]	GTP binding[GO:0005525]	intracellular[GO:0005622]	NA
TR49118|c0_g1_i1	12.8582	52.2624	2.02308	0.0139516	0.628997	No	PREDICTED: organ-specific protein S2-like	Sesamum indicum	NA	NA	NA	NA	NA
TR41250|c0_g3_i3	19.2873	78.3935	2.02308	0.020415	0.719835	No	NA	NA	NA	NA	NA	NA	NA
TR35186|c0_g2_i5	19.2873	78.3935	2.02308	0.020415	0.720784	No	NA	NA	NA	NA	NA	NA	NA
TR38034|c0_g1_i3	19.2873	78.3935	2.02308	0.020415	0.721259	No	NA	NA	NA	NA	NA	NA	NA
TR37427|c0_g3_i4	19.2873	78.3935	2.02308	0.020415	0.720309	No	NA	NA	NA	NA	NA	NA	NA
TR35673|c0_g16_i1	32.1455	130.656	2.02308	0.0207518	0.726447	No	NA	NA	NA	NA	NA	NA	NA
TR34380|c0_g1_i2	25.7164	104.525	2.02308	0.0216261	0.733098	No	PREDICTED: uncharacterized protein LOC105174762	Sesamum indicum	NA	NA	NA	NA	NA
TR43953|c5_g2_i1	25.7164	104.525	2.02308	0.0216261	0.732635	No	PREDICTED: subtilisin-like protease	Sesamum indicum	NA	NA	NA	NA	NA
TR33180|c1_g1_i6	1110.09	4524.43	2.02706	0.00739364	0.484704	No	hypothetical protein MIMGU_mgv1a011637mg	Mimulus guttatus	NA	NA	NA	NA	NA
TR37268|c0_g1_i5	53.5758	218.382	2.0272	0.0160902	0.663937	No	PREDICTED: protein STRICTOSIDINE SYNTHASE-LIKE 11	Sesamum indicum	NA	NA	NA	NA	NA
TR41848|c0_g5_i4	53.5758	218.382	2.0272	0.0160902	0.664449	No	NA	NA	NA	NA	NA	NA	NA
TR3431|c0_g1_i1	34.2885	139.988	2.02951	0.0199058	0.711719	No	PREDICTED: uncharacterized protein LOC105156082	Sesamum indicum	NA	NA	NA	NA	NA
TR36054|c0_g2_i1	27.8594	113.857	2.03099	0.0210064	0.729639	No	PREDICTED: uncharacterized protein LOC105161362	Sesamum indicum	NA	NA	NA	NA	NA
TR40182|c1_g2_i7	27.8594	113.857	2.03099	0.0210064	0.730113	No	PREDICTED: uncharacterized protein LOC105160499	Sesamum indicum	NA	NA	NA	NA	NA
TR2563|c0_g4_i1	42.8607	175.452	2.03335	0.0179455	0.688017	No	NA	NA	NA	NA	NA	NA	NA
TR42215|c0_g3_i1	21.4303	87.7261	2.03335	0.0205168	0.720578	No	hypothetical protein MIMGU_mgv1a011704mg	Mimulus guttatus	NA	sodium ion transport[GO:0006814] ; hydrogen ion transmembrane transport[GO:1902600] ; potassium ion homeostasis[GO:0055075] ; response to salt stress[GO:0009651]	solute:proton antiporter activity[GO:0015299]	integral component of membrane[GO:0016021] ; vacuolar membrane[GO:0005774] ; plasma membrane[GO:0005886]	NA
TR31380|c1_g1_i1	102.866	421.832	2.03591	0.00887104	0.520979	No	PREDICTED: protein RADIALIS-like 4	Sesamum indicum	NA	NA	NA	NA	NA
TR42231|c0_g5_i2	111.438	457.296	2.03689	0.00813527	0.497971	No	PREDICTED: cell division protein FtsZ homolog 1, chloroplastic isoform X1	Sesamum indicum	NA	NA	NA	NA	NA
TR41108|c0_g3_i2	15.0012	61.5949	2.03773	0.0167021	0.669082	No	PREDICTED: probable indole-3-acetic acid-amido synthetase GH3.5	Nicotiana tomentosiformis	NA	NA	NA	NA	NA
TR3146|c1_g1_i3	15.0012	61.5949	2.03773	0.0167021	0.668582	No	PREDICTED: uncharacterized protein LOC105952050	Erythranthe guttatus	NA	NA	NA	NA	NA
TR41604|c1_g4_i1	625.766	2570.19	2.03818	0.00513235	0.40664	No	hypothetical protein MIMGU_mgv1a001789mg	Mimulus guttatus	NA	proteolysis[GO:0006508]	serine-type endopeptidase activity[GO:0004252]	NA	NA
TR31264|c0_g2_i3	816.496	3355.99	2.03922	0.00580979	0.435206	No	PREDICTED: thaumatin-like protein	Sesamum indicum	NA	NA	NA	NA	NA
TR12669|c0_g1_i1	70.7201	291.176	2.0417	0.0123906	0.601666	No	PREDICTED: pleiotropic drug resistance protein 2-like isoform X3	Eucalyptus grandis	NA	NA	NA	NA	NA
TR40434|c0_g8_i2	32.1455	132.522	2.04355	0.019532	0.708282	No	PREDICTED: uncharacterized protein LOC105175433	Sesamum indicum	NA	NA	NA	NA	NA
TR25912|c0_g1_i3	90.0074	371.436	2.045	0.00983843	0.542684	No	hypothetical protein MIMGU_mgv1a010534mg	Mimulus guttatus	NA	NA	NA	NA	NA
TR33176|c0_g2_i6	124.296	513.291	2.046	0.00706441	0.473554	No	PREDICTED: glutathione transferase GST 23-like	Sesamum indicum	NA	NA	NA	NA	NA
TR30975|c0_g1_i2	357.887	1478.28	2.04634	0.00439091	0.373891	No	NA	NA	NA	NA	NA	NA	NA
TR38338|c0_g4_i6	413.605	1709.73	2.04744	0.00441216	0.374509	No	hypothetical protein MIMGU_mgv1a009538mg	Mimulus guttatus	NA	NA	NA	NA	NA
TR40785|c1_g3_i2	17.1443	70.9275	2.04862	0.0181059	0.685821	No	hypothetical protein MIMGU_mgv1a007945mg	Mimulus guttatus	NA	acetyl-CoA biosynthetic process from pyruvate[GO:0006086] ; oxidation-reduction process[GO:0055114]	pyruvate dehydrogenase (acetyl-transferring) activity[GO:0004739]	intracellular membrane-bounded organelle[GO:0043231]	map01130:Biosynthesis of antibiotics(dehydrogenase (acetyl-transferring)[ec:1.2.4.1]) ; map00020:Citrate cycle (TCA cycle)(dehydrogenase (acetyl-transferring)[ec:1.2.4.1]) ; map00620:Pyruvate metabolism(dehydrogenase (acetyl-transferring)[ec:1.2.4.1]) ; map00010:Glycolysis / Gluconeogenesis(dehydrogenase (acetyl-transferring)[ec:1.2.4.1])
TR38920|c1_g10_i3	17.1443	70.9275	2.04862	0.0181059	0.686306	No	hypothetical protein AMTR_s00059p00105450	Amborella trichopoda	NA	negative regulation of transcription, DNA-templated[GO:0045892]	NA	NA	NA
TR24806|c0_g5_i2	25.7164	106.391	2.04862	0.0201602	0.715561	No	PREDICTED: protein TIME FOR COFFEE	Sesamum indicum	NA	NA	NA	NA	NA
TR30975|c0_g4_i1	55.7189	231.448	2.05445	0.0142617	0.636547	No	NA	NA	NA	NA	NA	NA	NA
TR43340|c0_g1_i1	27.8594	115.724	2.05445	0.0196518	0.710224	No	PREDICTED: ribonuclease E/G-like protein, chloroplastic isoform X1	Erythranthe guttatus	NA	NA	NA	NA	NA
TR29198|c0_g1_i5	27.8594	115.724	2.05445	0.0196518	0.709746	No	NA	NA	NA	NA	NA	NA	NA
TR39166|c0_g4_i4	75.0062	311.708	2.05511	0.0112501	0.583309	No	PREDICTED: lysosomal beta glucosidase-like	Sesamum indicum	NA	NA	NA	NA	NA
TR28284|c0_g1_i1	47.1467	195.984	2.05551	0.0158934	0.659882	No	hypothetical protein MIMGU_mgv1a014165mg	Mimulus guttatus	NA	NA	NA	integral component of membrane[GO:0016021]	NA
TR35653|c0_g1_i2	66.434	276.244	2.05595	0.0123739	0.603046	No	PREDICTED: LOW QUALITY PROTEIN: butyrate--CoA ligase AAE11, peroxisomal-like	Sesamum indicum	NA	NA	NA	NA	NA
TR37112|c0_g1_i8	38.5746	160.52	2.05703	0.0174424	0.683403	No	hypothetical protein MIMGU_mgv1a009242mg	Mimulus guttatus	NA	NA	NA	NA	NA
TR3146|c1_g1_i1	70.7201	294.909	2.06008	0.0115878	0.588845	No	PREDICTED: uncharacterized protein LOC105169660	Sesamum indicum	NA	NA	NA	NA	NA
TR29628|c0_g4_i1	111.438	464.762	2.06025	0.00738703	0.484864	No	PREDICTED: glutathione transferase GST 23-like	Sesamum indicum	NA	NA	NA	NA	NA
TR37452|c0_g7_i2	40.7176	169.853	2.06056	0.0168577	0.670302	No	HPPR_SOLSCRecName: Full=Hydroxyphenylpyruvate reductase; Short=HPPR	Plectranthus scutellarioides	Lamiaceae	oxidation-reduction process[GO:0055114]	NAD binding[GO:0051287] ; hydroxyphenylpyruvate reductase activity[GO:0047995]	NA	map00130:Ubiquinone and other terpenoid-quinone biosynthesis(reductase[ec:1.1.1.237]) ; map00350:Tyrosine metabolism(reductase[ec:1.1.1.237]) ; map00360:Phenylalanine metabolism(reductase[ec:1.1.1.237]) ; map00960:Tropane, piperidine and pyridine alkaloid biosynthesis(reductase[ec:1.1.1.237])
TR37319|c1_g2_i6	75.0062	313.574	2.06373	0.0108958	0.569901	No	PREDICTED: RNA polymerase sigma factor sigD, chloroplastic	Sesamum indicum	NA	NA	NA	NA	NA
TR29125|c1_g1_i6	227.162	951.922	2.06712	0.00445666	0.375312	No	NA	NA	NA	NA	NA	NA	NA
TR30920|c1_g1_i4	34.2885	143.722	2.06748	0.0177447	0.685719	No	PREDICTED: uncharacterized protein LOC105164048	Sesamum indicum	NA	NA	NA	NA	NA
TR33912|c0_g2_i1	47.1467	197.85	2.06918	0.0151942	0.648449	No	PREDICTED: ATP-dependent Clp protease proteolytic subunit 5, chloroplastic-like	Sesamum indicum	NA	NA	NA	NA	NA
TR28550|c2_g3_i10	72.8631	306.108	2.07078	0.0108732	0.569276	No	hypothetical protein MIMGU_mgv1a012878mg	Mimulus guttatus	NA	NA	NA	NA	NA
TR24798|c0_g2_i1	574.333	2413.4	2.07111	0.00438653	0.374112	No	NA	NA	NA	NA	NA	NA	NA
TR30341|c0_g1_i1	62.148	261.312	2.07199	0.0123248	0.602846	No	PREDICTED: uncharacterized protein At1g76070	Sesamum indicum	NA	NA	NA	NA	NA
TR30882|c0_g2_i1	137.154	576.753	2.07215	0.00586974	0.436644	No	PREDICTED: phosphoethanolamine N-methyltransferase-like isoform X2	Sesamum indicum	NA	NA	NA	NA	NA
TR40403|c0_g2_i7	304.311	1280.43	2.07301	0.00398978	0.357345	No	PREDICTED: glycosylphosphatidylinositol anchor attachment 1 protein	Sesamum indicum	NA	NA	NA	NA	NA
TR2849|c1_g2_i1	12.8582	54.1289	2.07371	0.0125872	0.60736	No	Vacuolar H+-pumping ATPase 16 kDa proteolipid subunit 4 isoform 2, partial	Theobroma cacao	NA	ATP hydrolysis coupled proton transport[GO:0015991]	hydrogen ion transmembrane transporter activity[GO:0015078]	proton-transporting V-type ATPase, V0 domain[GO:0033179] ; integral component of membrane[GO:0016021]	NA
TR38606|c0_g3_i3	12.8582	54.1289	2.07371	0.0125872	0.606813	No	hypothetical protein MIMGU_mgv1a006560mg	Mimulus guttatus	NA	NA	NA	integral component of membrane[GO:0016021]	NA
TR25557|c0_g1_i2	51.4328	216.516	2.07371	0.0141379	0.634724	No	PREDICTED: uncharacterized protein LOC105168254	Sesamum indicum	NA	NA	NA	NA	NA
TR41911|c1_g8_i4	25.7164	108.258	2.07371	0.0188021	0.696433	No	PREDICTED: myosin-14	Sesamum indicum	NA	NA	NA	NA	NA
TR3908|c0_g2_i1	578.619	2437.67	2.07481	0.00433711	0.373466	No	PREDICTED: protein UXT homolog isoform X2	Sesamum indicum	NA	NA	NA	NA	NA
TR42640|c0_g2_i1	92.1504	388.235	2.07487	0.00851887	0.513818	No	NA	NA	NA	NA	NA	NA	NA
TR41245|c0_g5_i1	27.8594	117.59	2.07753	0.0183919	0.68838	No	PREDICTED: LOW QUALITY PROTEIN: glutamine--tRNA ligase-like	Sesamum indicum	NA	NA	NA	NA	NA
TR3435|c2_g8_i1	169.3	714.874	2.07811	0.00496269	0.398503	No	hypothetical protein MIMGU_mgv1a026895mg	Mimulus guttatus	NA	NA	NA	NA	NA
TR32797|c2_g1_i2	201.445	851.13	2.07899	0.00448061	0.373803	No	PREDICTED: probable S-adenosylmethionine-dependent methyltransferase At5g37990	Sesamum indicum	NA	NA	NA	NA	NA
TR41286|c1_g1_i3	210.017	888.46	2.0808	0.00435601	0.374491	No	PREDICTED: probable LRR receptor-like serine/threonine-protein kinase At3g47570	Nicotiana sylvestris	NA	NA	NA	NA	NA
TR38320|c0_g6_i3	60.0049	253.846	2.0808	0.0122834	0.602472	No	PREDICTED: uncharacterized protein LOC105967667	Erythranthe guttatus	NA	NA	NA	NA	NA
TR43424|c2_g4_i3	15.0012	63.4614	2.0808	0.0151278	0.646646	No	NA	NA	NA	NA	NA	NA	NA
TR2326|c0_g1_i8	77.1492	326.64	2.08198	0.00992088	0.546107	No	PREDICTED: uncharacterized protein LOC105177873	Sesamum indicum	NA	NA	NA	NA	NA
TR38005|c0_g1_i3	880.787	3729.29	2.08204	0.00523253	0.412138	No	PREDICTED: BTB/POZ domain-containing protein At2g30600	Sesamum indicum	NA	NA	NA	NA	NA
TR31876|c0_g4_i3	171.443	726.074	2.08239	0.00483593	0.394235	No	PREDICTED: protein GDAP2 homolog	Sesamum indicum	NA	NA	NA	NA	NA
TR2694|c2_g2_i7	32.1455	136.255	2.08363	0.0173209	0.681637	No	NA	NA	NA	NA	NA	NA	NA
TR4081|c0_g2_i5	98.5795	418.099	2.08448	0.00761148	0.489401	No	hypothetical protein MIMGU_mgv11b012645mg	Mimulus guttatus	NA	NA	NA	NA	NA
TR41709|c0_g1_i1	49.2898	209.049	2.08448	0.0140329	0.631069	No	PREDICTED: protein TRM32 isoform X1	Sesamum indicum	NA	NA	NA	NA	NA
TR33654|c0_g9_i4	51.4328	218.382	2.08609	0.013553	0.622021	No	PREDICTED: uncharacterized protein LOC105179131	Sesamum indicum	NA	NA	NA	NA	NA
TR39039|c0_g2_i3	17.1443	72.794	2.08609	0.0165039	0.665623	No	PREDICTED: transcription factor TCP10-like	Sesamum indicum	NA	NA	NA	NA	NA
TR40078|c0_g1_i2	17.1443	72.794	2.08609	0.0165039	0.665122	No	PREDICTED: putative phospholipid-transporting ATPase 9	Sesamum indicum	NA	NA	NA	NA	NA
TR38890|c0_g4_i2	34.2885	145.588	2.08609	0.0167619	0.668976	No	PREDICTED: myb family transcription factor APL isoform X3	Sesamum indicum	NA	NA	NA	NA	NA
TR33176|c0_g2_i8	19.2873	82.1266	2.0902	0.0171854	0.677799	No	PREDICTED: glutathione transferase GST 23-like	Sesamum indicum	NA	NA	NA	NA	NA
TR20469|c0_g1_i1	19.2873	82.1266	2.0902	0.0171854	0.6773	No	NA	NA	NA	NA	NA	NA	NA
TR34800|c0_g1_i2	252.878	1076.98	2.09048	0.00387857	0.352693	No	beta-1,3-glucanase	Olea europaea	NA	NA	hydrolase activity[GO:0016787]	NA	NA
TR39887|c0_g1_i1	40.7176	173.586	2.09192	0.015274	0.64875	No	NA	NA	NA	NA	NA	NA	NA
TR22805|c0_g1_i3	40.7176	173.586	2.09192	0.015274	0.649265	No	PREDICTED: uncharacterized protein LOC104599900 isoform X3	Nelumbo nucifera	NA	NA	NA	NA	NA
TR37620|c4_g8_i1	40.7176	173.586	2.09192	0.015274	0.649781	No	NA	NA	NA	NA	NA	NA	NA
TR35502|c1_g2_i3	70.7201	302.375	2.09615	0.0101447	0.554437	No	PREDICTED: caffeoylshikimate esterase-like	Sesamum indicum	NA	NA	NA	NA	NA
TR33448|c1_g1_i3	23.5734	100.792	2.09615	0.0176779	0.687105	No	PREDICTED: rRNA-processing protein EFG1-like isoform X2	Sesamum indicum	NA	NA	NA	NA	NA
TR28081|c0_g1_i1	100.723	431.165	2.09785	0.0070336	0.472672	No	unnamed protein product	Coffea canephora	NA	metal ion transport[GO:0030001]	metal ion binding[GO:0046872]	NA	NA
TR28856|c0_g1_i9	25.7164	110.124	2.09837	0.0175432	0.685351	No	hypothetical protein CARUB_v10003541mg	Capsella rubella	NA	protein phosphorylation[GO:0006468]	protein kinase activity[GO:0004672] ; ATP binding[GO:0005524]	NA	NA
TR38005|c0_g1_i1	987.938	4236.98	2.10054	0.00531485	0.413755	No	PREDICTED: BTB/POZ domain-containing protein At2g30600	Sesamum indicum	NA	NA	NA	NA	NA
TR31781|c0_g5_i1	30.0025	128.789	2.10186	0.0167924	0.669694	No	PREDICTED: uncharacterized protein LOC105161353	Sesamum indicum	NA	NA	NA	NA	NA
TR33439|c0_g13_i5	702.915	3021.88	2.10403	0.0042408	0.368729	No	PREDICTED: chlorophyll a-b binding protein of LHCII type 1-like	Glycine max	NA	response to light stimulus[GO:0009416] ; protein-chromophore linkage[GO:0018298] ; photosynthesis, light harvesting in photosystem I[GO:0009768]	chlorophyll binding[GO:0016168] ; pigment binding[GO:0031409]	integral component of membrane[GO:0016021] ; chloroplast envelope[GO:0009941] ; chloroplast thylakoid membrane[GO:0009535] ; photosystem II[GO:0009523] ; plastoglobule[GO:0010287]	NA
TR2958|c0_g1_i1	484.326	2086.76	2.10722	0.00360767	0.338401	No	PREDICTED: protein NRT1/ PTR FAMILY 5.2-like	Sesamum indicum	NA	NA	NA	NA	NA
TR42527|c0_g1_i8	40.7176	175.452	2.10735	0.0145423	0.646378	No	PREDICTED: non-lysosomal glucosylceramidase isoform X3	Sesamum indicum	NA	NA	NA	NA	NA
TR30771|c1_g1_i4	252.878	1091.91	2.11034	0.00356432	0.33551	No	PREDICTED: pleiotropic drug resistance protein 2-like, partial	Erythranthe guttatus	NA	NA	NA	NA	NA
TR38992|c0_g3_i1	55.7189	240.78	2.11148	0.0116821	0.589722	No	PREDICTED: NAC domain-containing protein 72-like	Sesamum indicum	NA	NA	NA	NA	NA
TR34800|c0_g1_i13	308.597	1340.16	2.11861	0.00328981	0.323901	No	beta-1,3-glucanase	Olea europaea	NA	NA	hydrolase activity[GO:0016787]	NA	NA
TR26139|c1_g1_i1	235.734	1026.58	2.12262	0.00346633	0.333316	No	putative metallothionin 2a	Salvia miltiorrhiza	NA	NA	NA	NA	NA
TR41420|c0_g7_i1	75.0062	326.64	2.12262	0.00871658	0.517583	No	PREDICTED: protein EXECUTER 1, chloroplastic	Sesamum indicum	NA	NA	NA	NA	NA
TR3954|c1_g1_i2	12.8582	55.9954	2.12262	0.011375	0.585248	No	PREDICTED: signal peptide peptidase-like 4 isoform X2	Sesamum indicum	NA	NA	NA	NA	NA
TR23764|c0_g1_i3	47.1467	205.316	2.12262	0.0127078	0.607163	No	PREDICTED: uncharacterized protein LOC105170479	Sesamum indicum	NA	NA	NA	NA	NA
TR40309|c0_g2_i3	47.1467	205.316	2.12262	0.0127078	0.607705	No	NA	NA	NA	NA	NA	NA	NA
TR22821|c0_g1_i2	42.8607	186.651	2.12262	0.0134774	0.620677	No	PREDICTED: elongation factor G-1, chloroplastic	Sesamum indicum	NA	NA	NA	NA	NA
TR44164|c4_g3_i1	15.0012	65.328	2.12262	0.013721	0.625976	No	PREDICTED: ankyrin-1-like, partial	Erythranthe guttatus	NA	NA	NA	NA	NA
TR38942|c0_g1_i1	36.4316	158.654	2.12262	0.014572	0.64449	No	PREDICTED: cytochrome P450 714C2-like, partial	Sesamum indicum	NA	NA	NA	NA	NA
TR43678|c1_g3_i2	34.2885	149.321	2.12262	0.0149709	0.649789	No	hypothetical protein M569_13638, partial	Genlisea aurea	NA	NA	NA	NA	NA
TR27529|c3_g1_i11	17.1443	74.6605	2.12262	0.0150622	0.649542	No	NA	NA	NA	NA	NA	NA	NA
TR33321|c2_g1_i1	17.1443	74.6605	2.12262	0.0150622	0.651115	No	NA	NA	NA	NA	NA	NA	NA
TR41150|c1_g3_i2	17.1443	74.6605	2.12262	0.0150622	0.65059	No	NA	NA	NA	NA	NA	NA	NA
TR38920|c1_g10_i2	17.1443	74.6605	2.12262	0.0150622	0.650066	No	hypothetical protein MIMGU_mgv1a002605mg	Mimulus guttatus	NA	NA	NA	NA	NA
TR3863|c0_g1_i4	23.5734	102.658	2.12262	0.0164425	0.668685	No	hypothetical protein MIMGU_mgv1a015081mg	Mimulus guttatus	NA	NA	calcium ion binding[GO:0005509]	NA	NA
TR25221|c0_g1_i2	617.194	2698.98	2.12862	0.00363192	0.338895	No	hypothetical protein M569_11308, partial	Genlisea aurea	NA	metabolic process[GO:0008152]	transferase activity, transferring hexosyl groups[GO:0016758]	NA	NA
TR36702|c0_g3_i3	85.7213	375.169	2.12981	0.0073788	0.484919	No	hypothetical protein BVRB_1g009970	Beta vulgaris subsp. vulgaris	NA	NA	NA	NA	NA
TR26943|c0_g1_i1	287.166	1259.9	2.13335	0.00312699	0.314815	No	cytochrome P450	Salvia miltiorrhiza	NA	NA	metal ion binding[GO:0046872] ; oxidoreductase activity[GO:0016491]	NA	NA
TR33934|c1_g1_i1	51.4328	225.848	2.13459	0.011458	0.58558	No	PREDICTED: probable xyloglucan endotransglucosylase/hydrolase protein 7	Sesamum indicum	NA	NA	NA	NA	NA
TR14459|c0_g1_i1	49.2898	216.516	2.13511	0.0118044	0.59199	No	NA	NA	NA	NA	NA	NA	NA
TR26810|c1_g1_i3	141.44	621.549	2.13568	0.00439132	0.373332	No	PREDICTED: protein lin-12	Sesamum indicum	NA	NA	NA	NA	NA
TR31910|c1_g1_i6	87.8644	388.235	2.14358	0.00678436	0.466457	No	expansin	Breonia chinensis	NA	plant-type cell wall organization[GO:0009664]	NA	integral component of membrane[GO:0016021] ; extracellular region[GO:0005576] ; cell wall[GO:0005618]	NA
TR28550|c2_g3_i7	81.4353	360.237	2.14522	0.00733304	0.483097	No	hypothetical protein MIMGU_mgv1a012878mg	Mimulus guttatus	NA	methylation[GO:0032259]	O-methyltransferase activity[GO:0008171]	NA	NA
TR25221|c0_g1_i1	645.053	2853.9	2.14544	0.00348061	0.334089	No	PREDICTED: 7-deoxyloganetin glucosyltransferase-like	Sesamum indicum	NA	NA	NA	NA	NA
TR41005|c1_g1_i2	345.028	1526.81	2.14573	0.00291659	0.3057	No	PREDICTED: beta-galactosidase-like	Sesamum indicum	NA	NA	NA	NA	NA
TR40414|c0_g1_i4	257.164	1138.57	2.14647	0.00303762	0.312274	No	PREDICTED: urea-proton symporter DUR3	Sesamum indicum	NA	NA	NA	NA	NA
TR28912|c0_g1_i2	124.296	550.621	2.14728	0.00461827	0.383496	No	NA	NA	NA	NA	NA	NA	NA
TR34671|c0_g1_i4	23.5734	104.525	2.14861	0.0153006	0.648854	No	NA	NA	NA	NA	NA	NA	NA
TR35498|c0_g4_i8	23.5734	104.525	2.14861	0.0153006	0.648341	No	PREDICTED: uncharacterized protein LOC105159582 isoform X1	Sesamum indicum	NA	NA	NA	NA	NA
TR38058|c0_g2_i3	40.7176	181.052	2.15268	0.0125626	0.60672	No	NA	NA	NA	NA	NA	NA	NA
TR23693|c0_g4_i7	57.8619	257.579	2.15433	0.00970701	0.54157	No	PREDICTED: uncharacterized protein LOC103401619	Malus domestica	NA	NA	NA	NA	NA
TR3507|c1_g2_i1	36.4316	162.387	2.15617	0.013103	0.613995	No	beta-tubulin 1	x Doritaenopsis hybrid cultivar	NA	microtubule-based process[GO:0007017] ; metabolic process[GO:0008152]	structural constituent of cytoskeleton[GO:0005200] ; GTP binding[GO:0005525] ; GTPase activity[GO:0003924]	cytoplasm[GO:0005737] ; microtubule[GO:0005874]	NA
TR51633|c0_g1_i1	53.5758	238.914	2.15684	0.0102554	0.555949	No	PREDICTED: 31 kDa ribonucleoprotein, chloroplastic-like	Setaria italica	NA	NA	NA	NA	NA
TR3357|c2_g1_i1	17.1443	76.527	2.15824	0.013763	0.625762	No	NA	NA	NA	NA	NA	NA	NA
TR37914|c0_g11_i4	32.1455	143.722	2.16059	0.0136764	0.626612	No	PREDICTED: heparan-alpha-glucosaminide N-acetyltransferase	Prunus mume	NA	NA	NA	NA	NA
TR31966|c0_g1_i1	79.2922	354.637	2.16109	0.00708018	0.473426	No	hypothetical protein MIMGU_mgv1a010248mg	Mimulus guttatus	NA	metabolic process[GO:0008152]	molybdenum ion binding[GO:0030151] ; pyridoxal phosphate binding[GO:0030170] ; catalytic activity[GO:0003824]	NA	NA
TR38338|c0_g4_i8	105.009	470.361	2.16326	0.005092	0.40645	No	hypothetical protein MIMGU_mgv1a009538mg	Mimulus guttatus	NA	NA	NA	NA	NA
TR30751|c1_g2_i5	30.0025	134.389	2.16326	0.0139458	0.629794	No	NA	NA	NA	NA	NA	NA	NA
TR20074|c0_g1_i1	396.461	1776.92	2.16413	0.00273855	0.293942	No	hypothetical protein MIMGU_mgv1a017106mg	Mimulus guttatus	NA	NA	NA	NA	NA
TR2796|c0_g1_i1	390.032	1754.52	2.16941	0.00267243	0.289163	No	putative dehydrin	Helianthus ciliaris	NA	response to stress[GO:0006950] ; response to water[GO:0009415]	NA	NA	NA
TR26578|c1_g1_i1	12.8582	57.8619	2.16993	0.0102945	0.556383	No	PREDICTED: protein LONGIFOLIA 2-like	Sesamum indicum	NA	NA	NA	NA	NA
TR36243|c0_g1_i2	195.016	879.128	2.17248	0.00304594	0.312529	No	PREDICTED: haloacid dehalogenase-like hydrolase domain-containing protein 3	Sesamum indicum	NA	NA	NA	NA	NA
TR2523|c0_g3_i2	192.873	869.795	2.17302	0.0030568	0.311852	No	PREDICTED: chlorophyll a-b binding protein 21, chloroplastic-like	Sesamum indicum	NA	NA	NA	NA	NA
TR20420|c0_g2_i2	47.1467	212.782	2.17415	0.0106489	0.563591	No	hypothetical protein MIMGU_mgv1a0014942mg, partial	Mimulus guttatus	NA	vesicle-mediated transport[GO:0016192] ; intracellular protein transport[GO:0006886]	NA	clathrin adaptor complex[GO:0030131]	NA
TR37663|c0_g1_i1	23.5734	106.391	2.17415	0.0142447	0.636852	No	PTC52-like protein 1	Ocimum basilicum	Lamiaceae	oxidation-reduction process[GO:0055114]	metal ion binding[GO:0046872] ; 2 iron, 2 sulfur cluster binding[GO:0051537] ; chlorophyllide a oxygenase [overall] activity[GO:0010277]	NA	map00860:Porphyrin and chlorophyll metabolism(oxygenase[ec:1.14.13.122])
TR39439|c0_g1_i2	23.5734	106.391	2.17415	0.0142447	0.636321	No	NA	NA	NA	NA	NA	NA	NA
TR2796|c0_g1_i5	158.584	716.741	2.1762	0.00339936	0.32924	No	DHN	Vaccinium corymbosum	NA	NA	NA	NA	NA
TR42649|c2_g8_i2	222.875	1007.92	2.17707	0.00280075	0.299418	No	PREDICTED: uncharacterized protein LOC105168700	Sesamum indicum	NA	NA	NA	NA	NA
TR36101|c0_g1_i10	477.896	2161.42	2.17721	0.00272441	0.294193	No	PREDICTED: uncharacterized protein LOC105158378	Sesamum indicum	NA	NA	NA	NA	NA
TR2326|c0_g1_i5	66.434	300.509	2.17741	0.00788903	0.490751	No	NA	NA	NA	NA	NA	NA	NA
TR36987|c0_g1_i4	87.8644	397.567	2.17785	0.00588329	0.437044	No	PREDICTED: uncharacterized protein LOC105173804	Sesamum indicum	NA	NA	NA	NA	NA
TR33439|c0_g5_i12	32.1455	145.588	2.1792	0.0129029	0.610492	No	putative chloroplast chlorophyll a/b binding protein	Vitis hybrid cultivar	NA	photosynthesis, light harvesting[GO:0009765] ; protein-chromophore linkage[GO:0018298]	chlorophyll binding[GO:0016168]	photosystem II[GO:0009523] ; integral component of membrane[GO:0016021] ; chloroplast[GO:0009507]	NA
TR33182|c1_g3_i5	21.4303	97.0587	2.1792	0.0139473	0.62933	No	unnamed protein product	Coffea canephora	NA	NA	NA	NA	NA
TR32527|c3_g4_i2	105.009	475.961	2.18033	0.00473056	0.388602	No	cinnamic acid 4-hydroxylase	Lithospermum erythrorhizon	NA	oxidation-reduction process[GO:0055114]	heme binding[GO:0020037] ; oxidoreductase activity, acting on paired donors, with incorporation or reduction of molecular oxygen[GO:0016705] ; monooxygenase activity[GO:0004497] ; iron ion binding[GO:0005506]	integral component of membrane[GO:0016021]	NA
TR42762|c0_g2_i1	60.0049	272.511	2.18316	0.00845482	0.511684	No	hypothetical protein MIMGU_mgv1a024732mg, partial	Mimulus guttatus	NA	NA	NA	NA	NA
TR36610|c0_g1_i2	36.4316	166.12	2.18896	0.0117967	0.59271	No	NA	NA	NA	NA	NA	NA	NA
TR19514|c0_g1_i1	180.015	821.266	2.18973	0.00295465	0.307882	No	PREDICTED: calcium-binding protein KIC-like	Sesamum indicum	NA	NA	NA	NA	NA
TR10267|c0_g1_i1	17.1443	78.3935	2.19301	0.0125907	0.605892	No	NA	NA	NA	NA	NA	NA	NA
TR28072|c0_g1_i1	17.1443	78.3935	2.19301	0.0125907	0.606437	No	PREDICTED: uncharacterized protein LOC104440686	Eucalyptus grandis	NA	NA	NA	integral component of membrane[GO:0016021]	NA
TR31186|c0_g4_i3	25.7164	117.59	2.19301	0.0133522	0.616502	No	NA	NA	NA	NA	NA	NA	NA
TR33702|c0_g4_i5	25.7164	117.59	2.19301	0.0133522	0.615971	No	PREDICTED: salicylate carboxymethyltransferase-like	Sesamum indicum	NA	NA	NA	NA	NA
TR34401|c0_g5_i7	1800.15	8240.66	2.19464	0.00687459	0.468452	No	PREDICTED: uncharacterized protein LOC105165595	Sesamum indicum	NA	NA	NA	NA	NA
TR37323|c1_g1_i2	102.866	472.228	2.19872	0.00447041	0.374118	No	PREDICTED: cinnamoyl-CoA reductase 1-like	Sesamum indicum	NA	NA	NA	NA	NA
TR38459|c0_g1_i3	23.5734	108.258	2.19924	0.0132677	0.614191	No	NA	NA	NA	NA	NA	NA	NA
TR35084|c0_g1_i8	154.298	709.275	2.20062	0.00311368	0.314065	No	NA	NA	NA	NA	NA	NA	NA
TR28449|c1_g1_i4	77.1492	354.637	2.20062	0.00621691	0.445753	No	PREDICTED: geraniol 8-hydroxylase-like	Sesamum indicum	NA	NA	NA	NA	NA
TR31934|c0_g2_i1	158.584	729.807	2.20226	0.00303308	0.313009	No	NA	NA	NA	NA	NA	NA	NA
TR37384|c0_g3_i4	156.441	720.474	2.20332	0.00304745	0.312087	No	PREDICTED: probable galactinol--sucrose galactosyltransferase 2	Sesamum indicum	NA	NA	NA	NA	NA
TR7632|c2_g2_i2	222.875	1028.45	2.20616	0.00246552	0.279183	No	PREDICTED: AP2/ERF and B3 domain-containing transcription factor RAV1-like	Sesamum indicum	NA	NA	NA	NA	NA
TR42612|c2_g2_i3	21.4303	98.9252	2.20668	0.0129449	0.609253	No	hypothetical protein JCGZ_10741	Jatropha curcas	NA	protein phosphorylation[GO:0006468]	protein kinase activity[GO:0004672] ; calcium ion binding[GO:0005509] ; ATP binding[GO:0005524]	NA	NA
TR42797|c0_g6_i1	21.4303	98.9252	2.20668	0.0129449	0.608718	No	hypothetical protein MIMGU_mgv1a019446mg	Mimulus guttatus	NA	NA	NA	NA	NA
TR39384|c1_g5_i1	62.148	287.443	2.2095	0.00741715	0.483876	No	hypothetical protein JCGZ_18736	Jatropha curcas	NA	oxidation-reduction process[GO:0055114]	zinc ion binding[GO:0008270] ; oxidoreductase activity[GO:0016491]	NA	NA
TR39581|c1_g4_i3	34.2885	158.654	2.21008	0.0113499	0.585083	No	NA	NA	NA	NA	NA	NA	NA
TR41286|c1_g1_i2	499.327	2312.61	2.21147	0.00241377	0.276242	No	PREDICTED: probable LRR receptor-like serine/threonine-protein kinase At3g47570-like	Solanum tuberosum	NA	NA	NA	NA	NA
TR38050|c3_g6_i4	66.434	307.975	2.21282	0.00688855	0.468806	No	NA	NA	NA	NA	NA	NA	NA
TR35250|c1_g1_i2	92.1504	427.431	2.21363	0.00477286	0.391477	No	PREDICTED: uncharacterized protein LOC104230835, partial	Nicotiana sylvestris	NA	NA	NA	NA	NA
TR38595|c0_g1_i1	12.8582	59.7284	2.21573	0.00932898	0.529301	No	hypothetical protein MIMGU_mgv1a012466mg	Mimulus guttatus	NA	NA	zinc ion binding[GO:0008270]	NA	NA
TR30249|c1_g2_i1	12.8582	59.7284	2.21573	0.00932898	0.529863	No	NA	NA	NA	NA	NA	NA	NA
TR31155|c0_g1_i1	12.8582	59.7284	2.21573	0.00932898	0.528741	No	PREDICTED: uncharacterized protein LOC105173634	Sesamum indicum	NA	NA	NA	NA	NA
TR34831|c0_g2_i5	12.8582	59.7284	2.21573	0.00932898	0.528182	No	PREDICTED: casein kinase I-like	Nelumbo nucifera	NA	NA	NA	NA	NA
TR28901|c0_g2_i4	19.2873	89.5926	2.21573	0.0123468	0.602273	No	PREDICTED: bromo adjacent homology domain-containing 1 protein isoform X2	Sesamum indicum	NA	NA	NA	NA	NA
TR30075|c1_g1_i1	801.495	3723.69	2.21597	0.00305654	0.312421	No	hypothetical protein MIMGU_mgv1a004505mg	Mimulus guttatus	NA	NA	metal ion binding[GO:0046872] ; oxidoreductase activity[GO:0016491]	NA	NA
TR32413|c0_g1_i6	49.2898	229.581	2.21964	0.0087601	0.519017	No	hypothetical protein EUGRSUZ_G01572	Eucalyptus grandis	NA	NA	NA	NA	NA
TR40035|c0_g1_i3	109.295	509.558	2.22102	0.00379274	0.348438	No	PREDICTED: uncharacterized protein LOC105177096 isoform X4	Sesamum indicum	NA	NA	NA	NA	NA
TR40414|c0_g1_i7	66.434	309.841	2.22153	0.00666034	0.460889	No	PREDICTED: urea-proton symporter DUR3	Sesamum indicum	NA	NA	NA	NA	NA
TR41451|c2_g1_i9	77.1492	360.237	2.22322	0.00566746	0.428137	No	PREDICTED: uncharacterized protein LOC105174183	Sesamum indicum	NA	NA	NA	NA	NA
TR31154|c0_g2_i3	105.009	490.893	2.2249	0.00389502	0.352991	No	PREDICTED: uncharacterized protein LOC105972393	Erythranthe guttatus	NA	NA	NA	NA	NA
TR43064|c0_g2_i1	34.2885	160.52	2.22696	0.0107488	0.567196	No	NA	NA	NA	NA	NA	NA	NA
TR34986|c3_g2_i2	17.1443	80.2601	2.22696	0.0115316	0.588221	No	PREDICTED: FAD synthase isoform X2	Sesamum indicum	NA	NA	NA	NA	NA
TR23958|c0_g1_i1	75.0062	352.771	2.23365	0.00560586	0.425283	No	hypothetical protein MIMGU_mgv1a015662mg	Mimulus guttatus	NA	response to biotic stimulus[GO:0009607] ; defense response[GO:0006952]	NA	NA	NA
TR39534|c4_g1_i2	64.291	302.375	2.23365	0.00655174	0.458707	No	hypothetical protein MIMGU_mgv1a0189873mg, partial	Mimulus guttatus	NA	metabolic process[GO:0008152]	ATPase activity[GO:0016887] ; ATP binding[GO:0005524]	NA	map00230:Purine metabolism(adenylpyrophosphatase[ec:3.6.1.3])
TR41319|c1_g2_i4	32.1455	151.188	2.23365	0.0108565	0.568958	No	PREDICTED: probable indole-3-acetic acid-amido synthetase GH3.5 isoform X1	Populus euphratica	NA	NA	NA	NA	NA
TR21732|c0_g1_i3	21.4303	100.792	2.23365	0.0120206	0.59835	No	NA	NA	NA	NA	NA	NA	NA
TR36896|c0_g4_i1	21.4303	100.792	2.23365	0.0120206	0.597795	No	PREDICTED: uncharacterized protein LOC105172258	Sesamum indicum	NA	NA	NA	NA	NA
TR42728|c1_g7_i1	21.4303	100.792	2.23365	0.0120206	0.59724	No	PREDICTED: root phototropism protein 2-like	Sesamum indicum	NA	NA	NA	NA	NA
TR41231|c0_g2_i3	126.439	595.418	2.23546	0.00311365	0.314655	No	PREDICTED: pentatricopeptide repeat-containing protein At3g59040	Sesamum indicum	NA	NA	NA	NA	NA
TR40403|c0_g2_i4	289.31	1362.55	2.23563	0.0020129	0.257921	No	PREDICTED: glycosylphosphatidylinositol anchor attachment 1 protein	Sesamum indicum	NA	NA	NA	NA	NA
TR35734|c0_g3_i2	25.7164	121.323	2.2381	0.0116769	0.590012	No	PREDICTED: uncharacterized protein LOC105177167	Sesamum indicum	NA	NA	NA	NA	NA
TR30772|c0_g1_i4	169.3	798.868	2.23838	0.00247521	0.279689	No	putative ethylene-responsive element binding protein	Salvia miltiorrhiza	NA	NA	NA	NA	NA
TR37650|c2_g1_i16	167.157	789.535	2.2398	0.00247997	0.278464	No	hypothetical protein B456_006G095700, partial	Gossypium raimondii	NA	NA	NA	NA	NA
TR28449|c1_g1_i2	246.449	1164.7	2.2406	0.00204216	0.259189	No	PREDICTED: geraniol 8-hydroxylase-like	Sesamum indicum	NA	NA	NA	NA	NA
TR39771|c0_g2_i1	15.0012	70.9275	2.24126	0.0103159	0.555854	No	PREDICTED: probable sulfate transporter 3.3	Sesamum indicum	NA	NA	NA	NA	NA
TR44738|c7_g5_i2	15.0012	70.9275	2.24126	0.0103159	0.555296	No	PREDICTED: probable LRR receptor-like serine/threonine-protein kinase At3g47570	Erythranthe guttatus	NA	NA	NA	NA	NA
TR31283|c0_g3_i5	113.581	537.556	2.2427	0.00331509	0.325195	No	PREDICTED: uncharacterized protein LOC105160017	Sesamum indicum	NA	NA	NA	NA	NA
TR41604|c1_g4_i4	130.725	619.682	2.24499	0.00290526	0.305708	No	PREDICTED: subtilisin-like protease	Sesamum indicum	NA	NA	NA	NA	NA
TR40434|c0_g3_i1	38.5746	182.918	2.24548	0.00952448	0.53529	No	NA	NA	NA	NA	NA	NA	NA
TR37817|c0_g1_i15	90.0074	427.431	2.24758	0.00424076	0.369325	No	hypothetical protein MIMGU_mgv1a009658mg	Mimulus guttatus	NA	metabolic process[GO:0008152]	catalytic activity[GO:0003824]	NA	NA
TR38932|c0_g1_i2	75.0062	356.504	2.24884	0.00526624	0.412972	No	PREDICTED: LRR receptor-like serine/threonine-protein kinase GSO1	Sesamum indicum	NA	NA	NA	NA	NA
TR40120|c0_g1_i2	96.4365	459.162	2.25135	0.00383045	0.350699	No	PREDICTED: transmembrane 9 superfamily member 3	Sesamum indicum	NA	NA	NA	NA	NA
TR38058|c0_g4_i1	64.291	306.108	2.25135	0.00611658	0.443908	No	hypothetical protein MIMGU_mgv1a010170mg	Mimulus guttatus	NA	NA	NA	NA	NA
TR34800|c0_g1_i7	347.171	1653.73	2.252	0.0018669	0.253784	No	PREDICTED: glucan endo-1,3-beta-glucosidase, acidic isoform PR-Q'-like	Sesamum indicum	NA	NA	NA	NA	NA
TR32931|c2_g1_i6	49.2898	235.181	2.25441	0.00772184	0.48829	No	NA	NA	NA	NA	NA	NA	NA
TR34225|c0_g1_i8	57.8619	276.244	2.25526	0.00665711	0.461261	No	hypothetical protein JCGZ_09570	Jatropha curcas	NA	NA	NA	NA	NA
TR30741|c0_g8_i3	2175.18	10398.3	2.25715	0.00705129	0.473267	No	PREDICTED: chlorophyll a-b binding protein 5, chloroplastic	Sesamum indicum	NA	NA	NA	NA	NA
TR32527|c3_g4_i1	212.16	1015.38	2.2588	0.00199466	0.258053	No	hypothetical protein MIMGU_mgv1a004883mg	Mimulus guttatus	NA	oxidation-reduction process[GO:0055114]	heme binding[GO:0020037] ; oxidoreductase activity, acting on paired donors, with incorporation or reduction of molecular oxygen[GO:0016705] ; monooxygenase activity[GO:0004497] ; iron ion binding[GO:0005506]	NA	NA
TR40406|c0_g4_i3	51.4328	246.38	2.26012	0.00728449	0.481082	No	unnamed protein product	Coffea canephora	NA	NA	NA	NA	NA
TR19388|c0_g1_i1	17.1443	82.1266	2.26012	0.0105736	0.564067	No	PREDICTED: chlorophyll a-b binding protein 21, chloroplastic-like	Sesamum indicum	NA	NA	NA	NA	NA
TR13101|c0_g1_i1	229.305	1103.11	2.26624	0.00186833	0.253337	No	NA	NA	NA	NA	NA	NA	NA
TR39727|c3_g2_i7	40.7176	195.984	2.26701	0.0085591	0.513354	No	PREDICTED: LRR receptor-like serine/threonine-protein kinase FLS2	Sesamum indicum	NA	NA	NA	NA	NA
TR34142|c0_g7_i1	235.734	1134.84	2.26726	0.00184138	0.252882	No	pathogenesis-related protein 10	Salvia miltiorrhiza	NA	response to biotic stimulus[GO:0009607] ; defense response[GO:0006952]	NA	NA	NA
TR42549|c1_g2_i10	68.5771	330.373	2.2683	0.00536934	0.416182	No	NA	NA	NA	NA	NA	NA	NA
TR2188|c0_g1_i2	27.8594	134.389	2.27018	0.0103055	0.556416	No	PREDICTED: uncharacterized protein LOC105177909	Sesamum indicum	NA	NA	NA	NA	NA
TR33934|c1_g1_i3	336.456	1623.87	2.27094	0.00171849	0.243499	No	PREDICTED: probable xyloglucan endotransglucosylase/hydrolase protein 7	Sesamum indicum	NA	NA	NA	NA	NA
TR23226|c0_g1_i2	51.4328	248.246	2.27101	0.00699509	0.47186	No	NA	NA	NA	NA	NA	NA	NA
TR8181|c5_g3_i2	42.8607	207.183	2.27318	0.00807743	0.494997	No	NA	NA	NA	NA	NA	NA	NA
TR43678|c1_g3_i1	115.724	559.954	2.27462	0.00282877	0.300017	No	hypothetical protein MIMGU_mgv1a003108mg	Mimulus guttatus	NA	regulation of transcription, DNA-templated[GO:0006355]	double-stranded DNA binding[GO:0003690]	mitochondrion[GO:0005739]	NA
TR30997|c0_g5_i1	38.5746	186.651	2.27462	0.00863391	0.516107	No	PREDICTED: probable WRKY transcription factor 40	Sesamum indicum	NA	NA	NA	NA	NA
TR3908|c0_g2_i6	572.19	2771.77	2.27624	0.00198607	0.260083	No	PREDICTED: floral homeotic protein AGAMOUS-like	Sesamum indicum	NA	NA	NA	NA	NA
TR28420|c0_g2_i2	34.2885	166.12	2.27642	0.00914735	0.527376	No	hypothetical protein MIMGU_mgv1a0146781mg, partial	Mimulus guttatus	NA	NA	NA	integral component of membrane[GO:0016021]	NA
TR43953|c5_g1_i2	188.587	914.591	2.2779	0.00194318	0.258255	No	PREDICTED: subtilisin-like protease SDD1	Sesamum indicum	NA	NA	NA	NA	NA
TR33604|c0_g2_i4	55.7189	270.644	2.28016	0.00627253	0.447346	No	PREDICTED: protein EARLY FLOWERING 4	Sesamum indicum	NA	NA	NA	NA	NA
TR41075|c0_g2_i1	25.7164	125.056	2.28182	0.0102277	0.556136	No	PREDICTED: probable WRKY transcription factor 4 isoform X1	Sesamum indicum	NA	NA	NA	NA	NA
TR2250|c2_g2_i2	171.443	834.331	2.28289	0.00201127	0.258331	No	Sal m 1 allergen	Salvia miltiorrhiza	NA	response to biotic stimulus[GO:0009607] ; defense response[GO:0006952]	NA	NA	NA
TR36757|c1_g1_i1	32.1455	156.787	2.28612	0.00916206	0.526524	No	hypothetical protein MIMGU_mgv1a011374mg	Mimulus guttatus	NA	NA	NA	NA	NA
TR40678|c0_g2_i1	32.1455	156.787	2.28612	0.00916206	0.527089	No	PREDICTED: RING finger and CHY zinc finger domain-containing protein 1-like isoform X2	Sesamum indicum	NA	NA	NA	NA	NA
TR35271|c1_g3_i4	2226.61	10868.7	2.28726	0.0066828	0.461251	No	SMLII	Salvia miltiorrhiza	NA	NA	NA	NA	NA
TR36101|c0_g2_i1	280.737	1371.89	2.28887	0.00160222	0.231308	No	PREDICTED: uncharacterized protein LOC105158378	Sesamum indicum	NA	NA	NA	NA	NA
TR36728|c0_g3_i3	105.009	513.291	2.28927	0.00292668	0.306158	No	PREDICTED: transcription factor BEE 2	Sesamum indicum	NA	NA	NA	NA	NA
TR3838|c0_g1_i2	27.8594	136.255	2.29008	0.00968093	0.540678	No	PREDICTED: lysine histidine transporter 1-like	Sesamum indicum	NA	NA	NA	NA	NA
TR32703|c1_g1_i4	128.582	629.015	2.29041	0.0024075	0.276116	No	hypothetical protein MIMGU_mgv1a011677mg	Mimulus guttatus	NA	NA	NA	NA	NA
TR34371|c2_g1_i2	516.471	2529.13	2.29188	0.00177768	0.249248	No	PREDICTED: uncharacterized protein LOC105165426	Sesamum indicum	NA	NA	NA	NA	NA
TR2326|c0_g1_i1	85.7213	419.965	2.29254	0.0037053	0.34335	No	PREDICTED: uncharacterized protein LOC105177873	Sesamum indicum	NA	NA	NA	NA	NA
TR33834|c0_g2_i1	51.4328	251.979	2.29254	0.00645236	0.455321	No	NA	NA	NA	NA	NA	NA	NA
TR29491|c1_g1_i2	70.7201	347.171	2.29546	0.00464608	0.384018	No	PREDICTED: probable carboxylesterase 15 isoform X1	Sesamum indicum	NA	NA	NA	NA	NA
TR36609|c2_g2_i1	147.869	726.074	2.29579	0.00210281	0.259509	No	PREDICTED: non-specific lipid-transfer protein 2-like	Sesamum indicum	NA	lipid transport[GO:0006869]	lipid binding[GO:0008289]	NA	NA
TR32995|c0_g1_i6	120.01	589.818	2.29712	0.00247897	0.278936	No	PREDICTED: protein CURVATURE THYLAKOID 1A, chloroplastic-like	Sesamum indicum	NA	NA	NA	NA	NA
TR36728|c0_g6_i4	30.0025	147.455	2.29712	0.00915196	0.527074	No	hypothetical protein MIMGU_mgv1a010637mg	Mimulus guttatus	NA	regulation of transcription, DNA-templated[GO:0006355]	protein dimerization activity[GO:0046983] ; transcription factor activity, sequence-specific DNA binding[GO:0003700]	nucleus[GO:0005634]	NA
TR30451|c0_g2_i3	225.019	1106.84	2.29833	0.00162994	0.234047	No	PREDICTED: 14 kDa proline-rich protein DC2.15-like	Erythranthe guttatus	NA	NA	NA	NA	NA
TR31283|c0_g6_i1	124.296	612.216	2.30026	0.00237095	0.274272	No	NA	NA	NA	NA	NA	NA	NA
TR13101|c0_g2_i1	94.2935	464.762	2.30126	0.00315445	0.31521	No	NA	NA	NA	NA	NA	NA	NA
TR33439|c0_g5_i11	743.633	3665.83	2.30148	0.00212352	0.260265	No	PREDICTED: chlorophyll a-b binding protein 21, chloroplastic-like	Sesamum indicum	NA	NA	NA	NA	NA
TR1740|c0_g2_i1	12.8582	63.4614	2.30319	0.00768786	0.490193	No	NA	NA	NA	NA	NA	NA	NA
TR30771|c1_g1_i5	38.5746	190.384	2.30319	0.00783131	0.489434	No	PREDICTED: pleiotropic drug resistance protein 2-like	Erythranthe guttatus	NA	NA	NA	NA	NA
TR25901|c0_g1_i1	38.5746	190.384	2.30319	0.00783131	0.488864	No	PREDICTED: ankyrin repeat-containing protein At3g12360-like	Erythranthe guttatus	NA	NA	NA	NA	NA
TR3117|c0_g3_i2	32.1455	158.654	2.30319	0.00866394	0.516749	No	PREDICTED: calvin cycle protein CP12-3, chloroplastic	Erythranthe guttatus	NA	NA	NA	NA	NA
TR7311|c0_g2_i3	25.7164	126.923	2.30319	0.00957746	0.536578	No	PREDICTED: uncharacterized protein LOC105158727	Sesamum indicum	NA	NA	NA	NA	NA
TR31737|c1_g6_i1	47.1467	233.314	2.30704	0.00661329	0.459414	No	NA	NA	NA	NA	NA	NA	NA
TR29280|c0_g1_i2	70.7201	350.904	2.31089	0.00435739	0.37401	No	hypothetical protein M569_04644, partial	Genlisea aurea	NA	NA	NA	NA	NA
TR44604|c3_g3_i2	454.323	2256.61	2.31237	0.00155299	0.227263	No	PREDICTED: subtilisin-like protease	Sesamum indicum	NA	NA	NA	NA	NA
TR42762|c1_g6_i6	30.0025	149.321	2.31526	0.00862939	0.516413	No	PREDICTED: probable receptor-like protein kinase At5g39020 isoform X2	Fragaria vesca subsp. vesca	NA	NA	NA	NA	NA
TR44221|c4_g4_i9	107.152	533.823	2.31671	0.00253018	0.282915	No	PREDICTED: putative disease resistance RPP13-like protein 1	Sesamum indicum	NA	NA	NA	NA	NA
TR20078|c0_g1_i1	321.455	1605.2	2.32007	0.00138814	0.214881	No	PREDICTED: EG45-like domain containing protein	Sesamum indicum	NA	NA	NA	NA	NA
TR22442|c0_g1_i1	490.755	2450.73	2.32014	0.00155216	0.227763	No	unnamed protein product	Coffea canephora	NA	NA	NA	NA	NA
TR31595|c0_g1_i1	105.009	524.49	2.32041	0.00254369	0.283244	No	PREDICTED: glucan endo-1,3-beta-glucosidase-like	Sesamum indicum	NA	NA	NA	NA	NA
TR40235|c0_g5_i2	36.4316	182.918	2.32794	0.00745653	0.480592	No	PREDICTED: uncharacterized protein LOC104597700	Nelumbo nucifera	NA	NA	NA	NA	NA
TR37194|c1_g1_i5	27.8594	139.988	2.32907	0.00855216	0.51409	No	tetraspanin-like protein	Solanum demissum	NA	NA	NA	integral component of membrane[GO:0016021]	NA
TR39534|c4_g1_i3	308.597	1552.94	2.33121	0.00132146	0.208783	No	PREDICTED: pleiotropic drug resistance protein 2-like	Sesamum indicum	NA	NA	NA	NA	NA
TR34401|c0_g5_i1	1515.12	7630.31	2.3323	0.00384405	0.350745	No	PREDICTED: uncharacterized protein LOC105165595	Sesamum indicum	NA	NA	NA	NA	NA
TR43406|c1_g1_i1	147.869	744.739	2.33241	0.0017809	0.248398	No	PREDICTED: AMP deaminase-like isoform X2	Sesamum indicum	NA	NA	NA	NA	NA
TR33182|c1_g3_i1	49.2898	248.246	2.33241	0.00577502	0.434424	No	unnamed protein product	Coffea canephora	NA	NA	NA	NA	NA
TR35250|c1_g1_i1	184.301	929.523	2.33443	0.00152314	0.225358	No	PREDICTED: uncharacterized protein LOC104230835, partial	Nicotiana sylvestris	NA	NA	NA	NA	NA
TR7463|c0_g1_i1	107.152	541.289	2.33674	0.00231098	0.272035	No	hypothetical protein MIMGU_mgv1a019221mg	Mimulus guttatus	NA	NA	NA	NA	NA
TR2313|c0_g1_i2	75.0062	378.902	2.33674	0.00363113	0.339413	No	hypothetical protein MIMGU_mgv1a019378mg	Mimulus guttatus	NA	NA	NA	NA	NA
TR2900|c0_g2_i2	3587.44	18226.5	2.34501	0.0106104	0.564341	No	PREDICTED: chlorophyll a-b binding protein 8, chloroplastic	Sesamum indicum	NA	NA	NA	NA	NA
TR31876|c0_g1_i2	15.0012	76.527	2.35089	0.00783696	0.488647	No	NA	NA	NA	NA	NA	NA	NA
TR37265|c0_g1_i1	240.02	1226.3	2.35309	0.00124539	0.200913	No	PREDICTED: PI-PLC X-box domain-containing protein DDB_G0293730	Sesamum indicum	NA	NA	NA	NA	NA
TR41286|c1_g1_i1	1067.23	5453.95	2.35343	0.00244657	0.277623	No	unnamed protein product	Coffea canephora	NA	NA	kinase activity[GO:0016301]	NA	NA
TR7816|c0_g1_i5	57.8619	296.776	2.35869	0.0044452	0.374937	No	NA	NA	NA	NA	NA	NA	NA
TR34817|c0_g4_i3	19.2873	98.9252	2.35869	0.00837518	0.508012	No	PREDICTED: protein FATTY ACID EXPORT 2, chloroplastic-like	Erythranthe guttatus	NA	NA	NA	NA	NA
TR39311|c0_g5_i1	40.7176	209.049	2.36012	0.00616305	0.444869	No	PREDICTED: leucine-rich repeat receptor-like serine/threonine/tyrosine-protein kinase SOBIR1	Sesamum indicum	NA	NA	NA	NA	NA
TR44593|c0_g2_i1	40.7176	209.049	2.36012	0.00616305	0.44427	No	NA	NA	NA	NA	NA	NA	NA
TR30524|c0_g1_i2	64.291	330.373	2.36141	0.00393985	0.354058	No	PREDICTED: bidirectional sugar transporter SWEET3b	Sesamum indicum	NA	NA	NA	NA	NA
TR39227|c1_g3_i2	23.5734	121.323	2.36363	0.00816472	0.499203	No	PREDICTED: F-box protein At3g07870-like	Sesamum indicum	NA	NA	NA	NA	NA
TR34142|c0_g12_i2	160.728	828.732	2.36629	0.00143496	0.216497	No	PREDICTED: major allergen Pru ar 1-like	Sesamum indicum	NA	NA	NA	NA	NA
TR28369|c0_g1_i1	171.443	884.727	2.36751	0.00136693	0.212828	No	NA	NA	NA	NA	NA	NA	NA
TR30771|c1_g1_i1	32.1455	166.12	2.36953	0.00695101	0.470665	No	hypothetical protein MIMGU_mgv1a0189871mg, partial	Mimulus guttatus	NA	NA	NA	integral component of membrane[GO:0016021]	NA
TR35055|c0_g2_i2	1515.12	7837.49	2.37095	0.00342794	0.330217	No	PREDICTED: thiamine thiazole synthase 1, chloroplastic	Eucalyptus grandis	NA	NA	NA	NA	NA
TR40635|c1_g7_i1	40.7176	210.916	2.37294	0.00588373	0.435868	No	PREDICTED: phosphoglucan phosphatase DSP4, amyloplastic	Sesamum indicum	NA	NA	NA	NA	NA
TR31283|c0_g5_i1	40.7176	210.916	2.37294	0.00588373	0.436471	No	NA	NA	NA	NA	NA	NA	NA
TR39534|c4_g1_i4	92.1504	477.827	2.37443	0.00233062	0.271956	No	NA	NA	NA	NA	NA	NA	NA
TR41876|c1_g1_i12	207.874	1078.84	2.3757	0.00118504	0.197727	No	unnamed protein product	Vitis vinifera	NA	transport[GO:0006810]	transporter activity[GO:0005215]	integral component of membrane[GO:0016021]	NA
TR35504|c2_g2_i1	72.8631	378.902	2.37856	0.00314335	0.315869	No	PREDICTED: uncharacterized protein LOC105175444	Sesamum indicum	NA	NA	NA	NA	NA
TR40225|c1_g5_i1	109.295	571.153	2.38565	0.00181296	0.25091	No	PREDICTED: golgin candidate 4	Erythranthe guttatus	NA	NA	NA	NA	NA
TR41604|c1_g4_i5	57.8619	302.375	2.38565	0.00398961	0.357929	No	hypothetical protein MIMGU_mgv1a0017511mg, partial	Mimulus guttatus	NA	proteolysis[GO:0006508]	serine-type endopeptidase activity[GO:0004252]	NA	NA
TR33469|c1_g5_i1	47.1467	246.38	2.38565	0.00491932	0.396805	No	PREDICTED: glutathione S-transferase DHAR3, chloroplastic	Sesamum indicum	NA	NA	NA	NA	NA
TR35300|c0_g1_i3	47.1467	246.38	2.38565	0.00491932	0.397403	No	PREDICTED: 1-aminocyclopropane-1-carboxylate oxidase homolog 1-like isoform X1	Sesamum indicum	NA	NA	NA	NA	NA
TR2184|c0_g4_i1	45.0037	235.181	2.38565	0.00514231	0.406828	No	NA	NA	NA	NA	NA	NA	NA
TR2981|c0_g1_i1	27.8594	145.588	2.38565	0.00711987	0.474304	No	hypothetical protein MIMGU_mgv1a013474mg	Mimulus guttatus	NA	NA	NA	NA	NA
TR18109|c0_g2_i1	19.2873	100.792	2.38565	0.00777038	0.489625	No	NA	NA	NA	NA	NA	NA	NA
TR29515|c0_g1_i2	19.2873	100.792	2.38565	0.00777038	0.48905	No	NA	NA	NA	NA	NA	NA	NA
TR34371|c2_g1_i1	1583.7	8304.12	2.39053	0.00340419	0.329113	No	PREDICTED: uncharacterized protein LOC105165426	Sesamum indicum	NA	NA	NA	NA	NA
TR39082|c2_g1_i1	72.8631	382.635	2.39271	0.0029541	0.308424	No	hypothetical protein MIMGU_mgv1a0042812mg, partial	Mimulus guttatus	NA	NA	NA	NA	NA
TR18376|c0_g1_i2	186.444	979.919	2.39392	0.00115051	0.195623	No	NA	NA	NA	NA	NA	NA	NA
TR23226|c0_g1_i1	53.5758	281.843	2.39524	0.00416223	0.367264	No	hypothetical protein MIMGU_mgv1a000405mg	Mimulus guttatus	NA	NA	NA	NA	NA
TR33748|c2_g1_i1	49.2898	259.445	2.39607	0.00452124	0.376606	No	PREDICTED: probable LRR receptor-like serine/threonine-protein kinase At3g47570	Sesamum indicum	NA	NA	NA	NA	NA
TR24351|c0_g1_i5	45.0037	237.047	2.39706	0.00492498	0.396664	No	PREDICTED: photosystem I subunit O	Sesamum indicum	NA	NA	NA	NA	NA
TR42627|c0_g2_i1	32.1455	169.853	2.4016	0.00623854	0.446109	No	NA	NA	NA	NA	NA	NA	NA
TR40309|c0_g2_i1	83.5783	442.364	2.40403	0.00232244	0.272188	No	hydroxycinnamoyltransferase 2	Glechoma hederacea	Lamiaceae	NA	transferase activity[GO:0016740]	NA	NA
TR39848|c0_g7_i1	25.7164	136.255	2.40555	0.0069351	0.471375	No	S-adenosylmethionine synthetase, partial	Populus trichocarpa	NA	S-adenosylmethionine biosynthetic process[GO:0006556]	methionine adenosyltransferase activity[GO:0004478] ; ATP binding[GO:0005524]	NA	map00270:Cysteine and methionine metabolism(adenosyltransferase[ec:2.5.1.6])
TR28434|c1_g1_i1	25.7164	136.255	2.40555	0.0069351	0.470182	No	NA	NA	NA	NA	NA	NA	NA
TR38054|c0_g1_i1	25.7164	136.255	2.40555	0.0069351	0.470778	No	NA	NA	NA	NA	NA	NA	NA
TR3618|c0_g1_i3	42.8607	227.715	2.4095	0.0049176	0.397865	No	hypothetical protein MIMGU_mgv1a014071mg	Mimulus guttatus	NA	NA	NA	membrane[GO:0016020]	NA
TR33246|c2_g2_i8	167.157	888.46	2.41011	0.00114018	0.195105	No	hypothetical protein BVRB_7g177210	Beta vulgaris subsp. vulgaris	NA	NA	binding[GO:0005488]	membrane[GO:0016020]	NA
TR2876|c0_g1_i1	40.7176	216.516	2.41074	0.00512348	0.406538	No	NA	NA	NA	NA	NA	NA	NA
TR44593|c0_g2_i5	42.8607	229.581	2.42128	0.00470419	0.38703	No	PREDICTED: probable LRR receptor-like serine/threonine-protein kinase At1g06840	Sesamum indicum	NA	NA	NA	NA	NA
TR31449|c0_g1_i1	83.5783	447.963	2.42218	0.00213616	0.260621	No	NA	NA	NA	NA	NA	NA	NA
TR32032|c1_g1_i10	355.744	1911.31	2.42565	0.000894609	0.169312	No	NA	NA	NA	NA	NA	NA	NA
TR41094|c1_g5_i3	47.1467	253.846	2.42872	0.00416435	0.366846	No	PREDICTED: probable receptor-like protein kinase At5g39020	Prunus mume	NA	NA	NA	NA	NA
TR30551|c2_g3_i2	23.5734	126.923	2.42872	0.00667074	0.461012	No	NA	NA	NA	NA	NA	NA	NA
TR44221|c4_g4_i10	173.586	935.123	2.42951	0.00101639	0.182677	No	PREDICTED: putative disease resistance RPP13-like protein 1	Sesamum indicum	NA	NA	NA	NA	NA
TR38207|c0_g4_i1	53.5758	289.31	2.43296	0.00357767	0.336175	No	hypothetical protein MIMGU_mgv1a010087mg	Mimulus guttatus	NA	NA	NA	NA	NA
TR37456|c0_g2_i4	21.4303	115.724	2.43296	0.00675537	0.465061	No	NA	NA	NA	NA	NA	NA	NA
TR2184|c0_g4_i10	100.723	545.022	2.43593	0.00156805	0.228841	No	NA	NA	NA	NA	NA	NA	NA
TR36400|c0_g1_i3	130.725	707.408	2.43601	0.00121891	0.199038	No	PREDICTED: beta-glucosidase 11-like isoform X2	Nicotiana tomentosiformis	NA	NA	NA	NA	NA
TR44738|c6_g3_i8	79.2922	429.298	2.43673	0.0021528	0.262054	No	hypothetical protein MIMGU_mgv1a000542mg	Mimulus guttatus	NA	NA	kinase activity[GO:0016301]	NA	NA
TR29156|c0_g1_i4	38.5746	209.049	2.43812	0.0048497	0.394757	No	hypothetical protein MIMGU_mgv1a004155mg	Mimulus guttatus	NA	NA	NA	membrane[GO:0016020]	NA
TR32543|c1_g1_i3	420.035	2277.15	2.43865	0.000894312	0.169856	No	hypothetical protein MIMGU_mgv1a006316mg	Mimulus guttatus	NA	metabolic process[GO:0008152]	transferase activity, transferring acyl groups other than amino-acyl groups[GO:0016747]	NA	NA
TR33439|c0_g13_i4	1178.67	6411.47	2.4435	0.00205317	0.259971	No	NA	NA	NA	NA	NA	NA	NA
TR31084|c0_g1_i3	25.7164	139.988	2.44455	0.0061107	0.444083	No	4-coumarate:coenzyme A ligase 1	Melissa officinalis	Lamiaceae	metabolic process[GO:0008152]	4-coumarate-CoA ligase activity[GO:0016207]	NA	map00130:Ubiquinone and other terpenoid-quinone biosynthesis(ligase[ec:6.2.1.12]) ; map00940:Phenylpropanoid biosynthesis(ligase[ec:6.2.1.12]) ; map00360:Phenylalanine metabolism(ligase[ec:6.2.1.12])
TR43953|c5_g1_i5	81.4353	444.23	2.44758	0.00197034	0.260571	No	NA	NA	NA	NA	NA	NA	NA
TR2812|c1_g1_i4	40.7176	222.115	2.44758	0.00446666	0.375564	No	PREDICTED: probable LRR receptor-like serine/threonine-protein kinase At3g47570	Sesamum indicum	NA	NA	NA	NA	NA
TR44738|c7_g5_i3	21.4303	117.59	2.45604	0.00629773	0.44795	No	PREDICTED: probable LRR receptor-like serine/threonine-protein kinase At3g47570	Erythranthe guttatus	NA	NA	NA	NA	NA
TR33439|c0_g13_i3	3546.72	19462.1	2.45611	0.00834101	0.506513	No	chloroplast LHCII type I chlorophyll a-b binding precursor protein	Ipomoea nil	NA	photosynthesis, light harvesting[GO:0009765] ; protein-chromophore linkage[GO:0018298]	chlorophyll binding[GO:0016168]	photosystem II[GO:0009523] ; integral component of membrane[GO:0016021] ; chloroplast[GO:0009507]	NA
TR2250|c2_g2_i5	38.5746	212.782	2.46366	0.0044138	0.373465	No	Sal m 1 allergen	Salvia miltiorrhiza	NA	response to biotic stimulus[GO:0009607] ; defense response[GO:0006952]	NA	NA	NA
TR35742|c0_g1_i5	12.8582	70.9275	2.46366	0.00528429	0.412575	No	hypothetical protein M569_12032	Genlisea aurea	NA	metabolic process[GO:0008152]	hydro-lyase activity[GO:0016836]	NA	NA
TR3540|c0_g1_i1	225.019	1244.96	2.46799	0.000749935	0.154487	No	hypothetical protein MIMGU_mgv1a005882mg	Mimulus guttatus	NA	NA	NA	membrane[GO:0016020]	NA
TR38338|c0_g4_i5	306.454	1696.66	2.46896	0.000720322	0.154322	No	hypothetical protein MIMGU_mgv1a009538mg	Mimulus guttatus	NA	NA	NA	NA	NA
TR32500|c1_g5_i5	132.868	739.139	2.47585	0.000996246	0.181493	No	PREDICTED: UDP-glycosyltransferase 74F2-like	Erythranthe guttatus	NA	NA	NA	NA	NA
TR39905|c0_g6_i1	10.7152	59.7284	2.47876	0.00403536	0.359623	No	NA	NA	NA	NA	NA	NA	NA
TR40434|c0_g2_i3	75.0062	419.965	2.48519	0.00186576	0.254923	No	PREDICTED: uncharacterized protein LOC105175433	Sesamum indicum	NA	NA	NA	NA	NA
TR32931|c2_g1_i5	53.5758	300.509	2.48775	0.00285979	0.302708	No	hypothetical protein MIMGU_mgv1a024506mg, partial	Mimulus guttatus	NA	NA	NA	NA	NA
TR35053|c1_g2_i2	72.8631	408.766	2.48802	0.00192208	0.257367	No	hypothetical protein CICLE_v10019846mg	Citrus clementina	NA	NA	ATP binding[GO:0005524]	integral component of membrane[GO:0016021]	NA
TR7473|c0_g1_i6	23.5734	132.522	2.49101	0.00546879	0.420242	No	PREDICTED: MYB-like transcription factor ETC3	Sesamum indicum	NA	NA	NA	NA	NA
TR42640|c0_g2_i6	23.5734	132.522	2.49101	0.00546879	0.420846	No	NA	NA	NA	NA	NA	NA	NA
TR3241|c1_g3_i6	135.011	761.537	2.49584	0.000893669	0.171559	No	NA	NA	NA	NA	NA	NA	NA
TR33263|c0_g1_i3	21.4303	121.323	2.50113	0.00547982	0.419885	No	NA	NA	NA	NA	NA	NA	NA
TR36380|c0_g2_i6	57.8619	328.506	2.50524	0.00243547	0.276951	No	PREDICTED: probable 2-carboxy-D-arabinitol-1-phosphatase	Sesamum indicum	NA	NA	NA	NA	NA
TR25010|c0_g1_i1	45.0037	255.712	2.50641	0.00321845	0.319815	No	PREDICTED: transcription factor bHLH35	Erythranthe guttatus	NA	NA	NA	NA	NA
TR27823|c0_g2_i3	19.2873	110.124	2.51341	0.00537703	0.416176	No	NA	NA	NA	NA	NA	NA	NA
TR36243|c0_g3_i1	15.0012	85.8596	2.5169	0.00506487	0.405493	No	NA	NA	NA	NA	NA	NA	NA
TR3241|c1_g3_i7	51.4328	294.909	2.51951	0.00262698	0.285978	No	PREDICTED: receptor-like protein 12	Erythranthe guttatus	NA	NA	NA	NA	NA
TR39326|c0_g2_i11	100.723	578.619	2.52223	0.0010448	0.184077	No	PREDICTED: mitogen-activated protein kinase 3	Sesamum indicum	NA	NA	NA	NA	NA
TR37801|c0_g1_i1	27.8594	160.52	2.52652	0.00443547	0.374706	No	PREDICTED: alcohol dehydrogenase 1B	Sesamum indicum	NA	NA	NA	NA	NA
TR37487|c0_g3_i1	34.2885	197.85	2.52861	0.0038329	0.350324	No	hypothetical protein MIMGU_mgv1a011894mg	Mimulus guttatus	NA	NA	NA	NA	NA
TR42550|c0_g2_i1	17.1443	98.9252	2.52861	0.00509488	0.406074	No	PREDICTED: pentatricopeptide repeat-containing protein At5g25630	Sesamum indicum	NA	NA	NA	NA	NA
TR32703|c1_g1_i11	115.724	668.212	2.52962	0.0008754	0.170496	No	PREDICTED: nudix hydrolase 2-like isoform X2	Erythranthe guttatus	NA	NA	NA	NA	NA
TR40403|c0_g2_i3	132.868	770.87	2.53649	0.000745625	0.154789	No	PREDICTED: glycosylphosphatidylinositol anchor attachment 1 protein	Sesamum indicum	NA	NA	NA	NA	NA
TR7614|c1_g1_i6	77.1492	447.963	2.53766	0.00139666	0.214341	No	PREDICTED: ethylene-responsive transcription factor ERF107-like	Sesamum indicum	NA	NA	NA	NA	NA
TR44738|c7_g5_i6	60.0049	349.038	2.54023	0.00200017	0.258142	No	NA	NA	NA	NA	NA	NA	NA
TR33246|c2_g2_i7	169.3	985.519	2.5413	0.000606978	0.138931	No	PREDICTED: lysine histidine transporter-like 8	Sesamum indicum	NA	NA	NA	NA	NA
TR36400|c0_g1_i5	130.725	761.537	2.54238	0.000735143	0.155017	No	PREDICTED: beta-glucosidase 11-like isoform X3	Solanum tuberosum	NA	NA	NA	NA	NA
TR26578|c2_g1_i1	55.7189	326.64	2.55146	0.00209194	0.260569	No	PREDICTED: protein LONGIFOLIA 2-like	Sesamum indicum	NA	NA	NA	NA	NA
TR33197|c0_g1_i10	57.8619	339.705	2.5536	0.00197813	0.259679	No	PREDICTED: uncharacterized protein LOC105175007	Sesamum indicum	NA	NA	NA	NA	NA
TR34017|c4_g3_i4	115.724	681.277	2.55756	0.000765495	0.155893	No	PREDICTED: protein NLP7-like isoform X1	Erythranthe guttatus	NA	NA	NA	NA	NA
TR44813|c4_g7_i2	45.0037	265.045	2.55812	0.00261305	0.285622	No	PREDICTED: probable leucine-rich repeat receptor-like protein kinase At5g63930	Sesamum indicum	NA	NA	NA	NA	NA
TR3241|c1_g3_i1	160.728	948.189	2.56056	0.000572298	0.131555	No	PREDICTED: receptor-like protein 12	Erythranthe guttatus	NA	NA	NA	NA	NA
TR42527|c0_g3_i1	23.5734	139.988	2.57008	0.00421804	0.369148	No	hypothetical protein MIMGU_mgv1a000652mg	Mimulus guttatus	NA	metabolic process[GO:0008152]	glycogen (starch) synthase activity[GO:0004373]	NA	map00500:Starch and sucrose metabolism(synthase[ec:2.4.1.11])
TR29491|c1_g1_i1	83.5783	498.359	2.57598	0.00102786	0.184121	No	PREDICTED: probable carboxylesterase 15 isoform X1	Sesamum indicum	NA	NA	NA	NA	NA
TR37781|c0_g1_i2	315.026	1879.58	2.57687	0.000448339	0.114348	No	PREDICTED: uncharacterized protein LOC105174142	Sesamum indicum	NA	NA	NA	NA	NA
TR43738|c0_g10_i1	15.0012	89.5926	2.5783	0.00428507	0.370175	No	SecA homolog	Pisum sativum=peas, Peptide Chloroplast Partial, 276 aa	NA	protein import[GO:0017038] ; protein targeting[GO:0006605]	ATP binding[GO:0005524]	intracellular[GO:0005622] ; membrane[GO:0016020]	NA
TR34142|c0_g1_i1	150.012	897.793	2.5813	0.000543722	0.127727	No	PREDICTED: major allergen Pru ar 1-like	Sesamum indicum	NA	NA	NA	NA	NA
TR27945|c1_g1_i2	90.0074	539.422	2.5833	0.000892912	0.17203	No	NA	NA	NA	NA	NA	NA	NA
TR37930|c0_g1_i3	529.329	3188	2.59042	0.000545876	0.127673	No	PREDICTED: sugar carrier protein C	Sesamum indicum	NA	NA	NA	NA	NA
TR3267|c1_g1_i2	27.8594	169.853	2.60805	0.00333782	0.326826	No	NA	NA	NA	NA	NA	NA	NA
TR2595|c0_g1_i2	152.155	929.523	2.61095	0.000465447	0.117591	No	PREDICTED: protein NIM1-INTERACTING 2	Sesamum indicum	NA	NA	NA	NA	NA
TR2523|c0_g2_i1	1165.81	7130.08	2.61259	0.00119283	0.197796	No	PREDICTED: chlorophyll a-b binding protein 21, chloroplastic-like	Sesamum indicum	NA	NA	NA	NA	NA
TR21800|c0_g1_i1	102.866	630.881	2.61661	0.00064937	0.144918	No	hypothetical protein MIMGU_mgv1a011266mg	Mimulus guttatus	NA	cell wall organization[GO:0071555] ; xyloglucan metabolic process[GO:0010411] ; cell wall biogenesis[GO:0042546]	xyloglucan:xyloglucosyl transferase activity[GO:0016762] ; hydrolase activity, hydrolyzing O-glycosyl compounds[GO:0004553]	cell wall[GO:0005618] ; apoplast[GO:0048046]	NA
TR23098|c0_g1_i3	75.0062	461.029	2.61978	0.000981286	0.179992	No	PREDICTED: uncharacterized protein LOC105162031	Sesamum indicum	NA	NA	NA	NA	NA
TR30668|c4_g5_i1	77.1492	475.961	2.62512	0.000913673	0.171706	No	NA	NA	NA	NA	NA	NA	NA
TR32690|c3_g3_i8	49.2898	304.242	2.62586	0.00176583	0.248235	No	hypothetical protein PHAVU_002G240900g	Phaseolus vulgaris	NA	NA	NA	NA	NA
TR31725|c0_g1_i1	300.025	1859.05	2.63141	0.000347329	0.101103	No	PREDICTED: glucan endo-1,3-beta-glucosidase-like	Sesamum indicum	NA	NA	NA	NA	NA
TR38589|c0_g4_i2	34.2885	212.782	2.63358	0.00258767	0.285764	No	AMT1;5	Malus hupehensis var. mengshanensis	NA	ammonium transmembrane transport[GO:0072488]	ammonium transmembrane transporter activity[GO:0008519]	integral component of membrane[GO:0016021]	NA
TR40758|c0_g2_i2	32.1455	199.717	2.63527	0.00272597	0.293179	No	hypothetical protein MIMGU_mgv1a018561mg, partial	Mimulus guttatus	NA	NA	nucleic acid binding[GO:0003676] ; nucleotide binding[GO:0000166]	NA	NA
TR42169|c0_g2_i6	47.1467	293.043	2.63588	0.00178799	0.248094	No	PREDICTED: MLO-like protein 1 isoform X3	Sesamum indicum	NA	NA	NA	NA	NA
TR39727|c3_g1_i1	15.0012	93.3257	2.63719	0.00364087	0.339139	No	PREDICTED: serine/threonine-protein kinase BRI1-like 2	Erythranthe guttatus	NA	NA	NA	NA	NA
TR44659|c0_g1_i4	42.8607	266.911	2.63863	0.00198647	0.259501	No	PREDICTED: small subunit processome component 20 homolog isoform X3	Sesamum indicum	NA	NA	NA	NA	NA
TR7941|c1_g1_i2	83.5783	520.757	2.63941	0.000752286	0.154377	No	hypothetical protein MIMGU_mgv1a023022mg, partial	Mimulus guttatus	NA	ion transmembrane transport[GO:0034220]	ion channel activity[GO:0005216]	integral component of membrane[GO:0016021]	NA
TR35480|c0_g1_i3	72.8631	455.429	2.64397	0.00091342	0.172263	No	PREDICTED: uncharacterized protein LOC105164999	Sesamum indicum	NA	NA	NA	NA	NA
TR33675|c0_g4_i1	23.5734	147.455	2.64504	0.00327255	0.322795	No	PREDICTED: ribulose-phosphate 3-epimerase, cytoplasmic isoform isoform X1	Sesamum indicum	NA	NA	NA	NA	NA
TR44659|c0_g1_i6	32.1455	201.583	2.64869	0.00259226	0.285682	No	NA	NA	NA	NA	NA	NA	NA
TR39384|c1_g2_i3	40.7176	257.579	2.66129	0.00192319	0.256233	No	PREDICTED: probable mannitol dehydrogenase-like	Fragaria vesca subsp. vesca	NA	NA	NA	NA	NA
TR33197|c0_g1_i8	79.2922	502.092	2.6627	0.000726025	0.154309	No	PREDICTED: uncharacterized protein LOC105175007	Sesamum indicum	NA	NA	NA	NA	NA
TR36559|c1_g1_i2	130.725	832.465	2.67085	0.000391601	0.10756	No	NA	NA	NA	NA	NA	NA	NA
TR20987|c0_g1_i1	19.2873	123.19	2.67516	0.00326567	0.32271	No	PREDICTED: subtilisin-like protease SDD1	Sesamum indicum	NA	NA	NA	NA	NA
TR33934|c1_g1_i2	334.313	2140.89	2.67894	0.000290778	0.0895061	No	hypothetical protein MIMGU_mgv1a011266mg	Mimulus guttatus	NA	cell wall organization[GO:0071555] ; xyloglucan metabolic process[GO:0010411] ; cell wall biogenesis[GO:0042546]	xyloglucan:xyloglucosyl transferase activity[GO:0016762] ; hydrolase activity, hydrolyzing O-glycosyl compounds[GO:0004553]	cell wall[GO:0005618] ; apoplast[GO:0048046]	NA
TR38613|c0_g2_i7	34.2885	220.249	2.68333	0.00213342	0.260882	No	NA	NA	NA	NA	NA	NA	NA
TR32399|c0_g1_i1	162.871	1047.11	2.68462	0.000308798	0.0939728	No	PREDICTED: probable carboxylesterase 12	Sesamum indicum	NA	NA	NA	NA	NA
TR39035|c0_g1_i3	312.883	2038.23	2.70362	0.000254384	0.0811	No	endopeptidase 1	Plantago major	NA	proteolysis[GO:0006508]	peptidase activity[GO:0008233]	NA	NA
TR30451|c0_g2_i1	30.0025	195.984	2.70758	0.0022058	0.266687	No	Proline-rich protein	Medicago truncatula	NA	NA	NA	NA	NA
TR34142|c0_g5_i2	25.7164	167.986	2.70758	0.00247684	0.279283	No	pathogenesis-related protein 10	Salvia miltiorrhiza	NA	response to biotic stimulus[GO:0009607] ; defense response[GO:0006952]	NA	NA	NA
TR36400|c0_g1_i6	62.148	408.766	2.7175	0.000832111	0.164457	No	unnamed protein product	Coffea canephora	NA	NA	NA	membrane[GO:0016020]	NA
TR33197|c0_g1_i6	139.297	922.057	2.72669	0.000280435	0.0868214	No	PREDICTED: uncharacterized protein LOC105175007	Sesamum indicum	NA	NA	NA	NA	NA
TR44018|c4_g2_i1	32.1455	212.782	2.72669	0.00192292	0.256837	No	unnamed protein product	Coffea canephora	NA	NA	NA	NA	NA
TR25901|c0_g1_i2	49.2898	328.506	2.73656	0.00108895	0.189365	No	hypothetical protein MIMGU_mgv1a005882mg	Mimulus guttatus	NA	NA	NA	membrane[GO:0016020]	NA
TR36559|c4_g2_i1	111.438	742.872	2.73688	0.000328262	0.0971365	No	NA	NA	NA	NA	NA	NA	NA
TR41876|c1_g1_i5	167.157	1116.17	2.73929	0.000231513	0.0760726	No	unnamed protein product	Vitis vinifera	NA	transport[GO:0006810]	transporter activity[GO:0005215]	integral component of membrane[GO:0016021]	NA
TR4018|c1_g1_i2	57.8619	386.368	2.73929	0.000844413	0.165666	No	PREDICTED: protein CURVATURE THYLAKOID 1A, chloroplastic-like	Sesamum indicum	NA	NA	NA	NA	NA
TR35186|c0_g1_i7	53.5758	358.371	2.7418	0.000943842	0.175528	No	PREDICTED: uncharacterized protein LOC105160086	Sesamum indicum	NA	NA	NA	NA	NA
TR30451|c0_g2_i5	98.5795	664.479	2.75286	0.000346643	0.101455	No	NA	NA	NA	NA	NA	NA	NA
TR44215|c1_g4_i3	32.1455	220.249	2.77644	0.00158026	0.229374	No	PREDICTED: probable galactinol--sucrose galactosyltransferase 2	Sesamum indicum	NA	NA	NA	NA	NA
TR39869|c3_g4_i1	175.729	1224.43	2.80069	0.000165754	0.059985	No	hypothetical protein VITISV_024659	Vitis vinifera	NA	NA	binding[GO:0005488]	NA	NA
TR44738|c6_g8_i1	38.5746	268.778	2.80069	0.00114366	0.195078	No	unnamed protein product, partial	Coffea canephora	NA	NA	NA	NA	NA
TR33439|c0_g5_i5	634.338	4447.9	2.8098	0.000276164	0.0859962	No	chlorophyll a/b binding protein	Medicago sativa	NA	photosynthesis, light harvesting[GO:0009765] ; protein-chromophore linkage[GO:0018298]	metal ion binding[GO:0046872] ; chlorophyll binding[GO:0016168]	photosystem II[GO:0009523] ; integral component of membrane[GO:0016021] ; chloroplast[GO:0009507] ; photosystem I[GO:0009522]	NA
TR35367|c1_g6_i2	36.4316	255.712	2.81126	0.00117847	0.198487	No	hypothetical protein MIMGU_mgv1a010128mg	Mimulus guttatus	NA	NA	NA	NA	NA
TR43164|c5_g2_i1	23.5734	166.12	2.81699	0.00178024	0.248955	No	NA	NA	NA	NA	NA	NA	NA
TR36899|c1_g4_i12	40.7176	287.443	2.81955	0.000978732	0.180141	No	hypothetical protein MIMGU_mgv1a016465mg	Mimulus guttatus	NA	NA	NA	NA	NA
TR32208|c1_g6_i1	36.4316	257.579	2.82175	0.00112701	0.194092	No	NA	NA	NA	NA	NA	NA	NA
TR31380|c1_g3_i1	25.7164	182.918	2.83044	0.00158212	0.229023	No	PREDICTED: protein RADIALIS-like 1	Sesamum indicum	NA	NA	NA	NA	NA
TR804|c0_g2_i1	12.8582	91.4591	2.83044	0.00203085	0.258981	No	NA	NA	NA	NA	NA	NA	NA
TR30276|c0_g2_i3	173.586	1235.63	2.83153	0.000142803	0.0558287	No	PREDICTED: uncharacterized protein LOC105177434	Sesamum indicum	NA	NA	NA	NA	NA
TR28795|c0_g1_i1	21.4303	153.054	2.83632	0.00178461	0.248269	No	hypothetical protein MIMGU_mgv1a016078mg	Mimulus guttatus	NA	NA	NA	NA	NA
TR3658|c0_g1_i1	246.449	1763.85	2.83937	0.000128483	0.052935	No	PREDICTED: protein ASPARTIC PROTEASE IN GUARD CELL 1-like	Sesamum indicum	NA	NA	NA	NA	NA
TR7955|c1_g1_i2	169.3	1226.3	2.85666	0.000127341	0.0532842	No	hypothetical protein MIMGU_mgv1a001731mg	Mimulus guttatus	NA	proteolysis[GO:0006508]	serine-type endopeptidase activity[GO:0004252]	NA	NA
TR44018|c4_g1_i4	17.1443	125.056	2.86678	0.0018319	0.252227	No	unnamed protein product	Coffea canephora	NA	NA	NA	NA	NA
TR34270|c2_g4_i2	107.152	785.802	2.87451	0.000169065	0.0603675	No	NA	NA	NA	NA	NA	NA	NA
TR25901|c0_g1_i3	57.8619	425.565	2.87869	0.000422445	0.112011	No	hypothetical protein MIMGU_mgv1a005882mg	Mimulus guttatus	NA	NA	NA	NA	NA
TR34230|c0_g1_i4	38.5746	283.71	2.87869	0.000813128	0.162504	No	PREDICTED: probable metal-nicotianamine transporter YSL14, partial	Nelumbo nucifera	NA	NA	NA	NA	NA
TR19693|c0_g3_i1	23.5734	173.586	2.88042	0.00140998	0.215768	No	NA	NA	NA	NA	NA	NA	NA
TR31495|c1_g1_i2	75.0062	552.488	2.88086	0.000259294	0.0812151	No	PREDICTED: late embryogenesis abundant protein Lea5-like	Nicotiana sylvestris	NA	NA	NA	NA	NA
TR3304|c0_g6_i1	32.1455	238.914	2.8938	0.00097697	0.180436	No	hypothetical protein M569_02083, partial	Genlisea aurea	NA	translation[GO:0006412]	structural constituent of ribosome[GO:0003735]	ribosome[GO:0005840]	NA
TR30409|c0_g1_i4	19.2873	143.722	2.89755	0.00154712	0.227647	No	NA	NA	NA	NA	NA	NA	NA
TR32261|c4_g4_i1	75.0062	569.286	2.92407	0.000206509	0.0695637	No	NA	NA	NA	NA	NA	NA	NA
TR33176|c0_g2_i5	30.0025	227.715	2.92407	0.000938749	0.175802	No	NA	NA	NA	NA	NA	NA	NA
TR40831|c0_g3_i11	23.5734	179.185	2.92622	0.00118843	0.197678	No	PREDICTED: zinc finger CCCH domain-containing protein 29-like	Sesamum indicum	NA	NA	NA	NA	NA
TR2850|c1_g4_i4	27.8594	212.782	2.93314	0.000986886	0.180401	No	PREDICTED: uncharacterized protein LOC105173228	Sesamum indicum	NA	NA	NA	NA	NA
TR23098|c0_g1_i2	19.2873	147.455	2.93455	0.00135702	0.211901	No	PREDICTED: uncharacterized protein LOC105162031	Sesamum indicum	NA	NA	NA	NA	NA
TR41624|c0_g3_i3	30.0025	229.581	2.93585	0.000893892	0.170989	No	NA	NA	NA	NA	NA	NA	NA
TR34225|c0_g1_i4	83.5783	640.214	2.93735	0.000165017	0.0605364	No	PREDICTED: uncharacterized protein LOC105177106	Sesamum indicum	NA	NA	NA	NA	NA
TR34270|c2_g4_i3	25.7164	197.85	2.94365	0.00102967	0.18322	No	NA	NA	NA	NA	NA	NA	NA
TR39149|c2_g2_i3	47.1467	363.97	2.94859	0.000433666	0.113859	No	NA	NA	NA	NA	NA	NA	NA
TR44022|c0_g2_i1	47.1467	365.837	2.95597	0.000418286	0.112017	No	PREDICTED: beta-galactosidase 10	Sesamum indicum	NA	NA	NA	NA	NA
TR19693|c0_g1_i1	32.1455	250.113	2.95989	0.000736904	0.154779	No	PREDICTED: organ-specific protein S2-like	Sesamum indicum	NA	NA	NA	NA	NA
TR29125|c1_g2_i1	21.4303	169.853	2.98656	0.00102908	0.183725	No	NA	NA	NA	NA	NA	NA	NA
TR16897|c0_g1_i1	17.1443	136.255	2.99052	0.00120693	0.198903	No	NA	NA	NA	NA	NA	NA	NA
TR40831|c0_g6_i1	30.0025	242.647	3.0157	0.000636976	0.143346	No	PREDICTED: zinc finger CCCH domain-containing protein 29	Sesamum indicum	NA	NA	NA	NA	NA
TR19607|c0_g1_i1	57.8619	470.361	3.02308	0.000197308	0.0673109	No	PREDICTED: 15.4 kDa class V heat shock protein	Sesamum indicum	NA	NA	NA	NA	NA
TR39035|c0_g1_i4	51.4328	425.565	3.04862	0.000220022	0.0731949	No	endopeptidase 1	Plantago major	NA	proteolysis[GO:0006508]	peptidase activity[GO:0008233]	NA	NA
TR23607|c0_g1_i1	32.1455	266.911	3.05367	0.000487111	0.118589	No	hypothetical protein MIMGU_mgv1a011768mg	Mimulus guttatus	NA	carbohydrate metabolic process[GO:0005975] ; chitin catabolic process[GO:0006032] ; cell wall macromolecule catabolic process[GO:0016998]	chitinase activity[GO:0004568] ; chitin binding[GO:0008061]	NA	map00520:Amino sugar and nucleotide sugar metabolism(chitodextrinase[ec:3.2.1.14])
TR20188|c0_g2_i1	12.8582	110.124	3.09837	0.000940537	0.175523	No	NA	NA	NA	NA	NA	NA	NA
TR39149|c2_g2_i2	45.0037	391.968	3.12262	0.000196561	0.0674859	No	PREDICTED: uncharacterized protein LOC106448030	Brassica napus	NA	NA	NA	NA	NA
TR3908|c0_g3_i1	15.0012	134.389	3.16326	0.000720151	0.154905	No	NA	NA	NA	NA	NA	NA	NA
TR30799|c0_g2_i1	21.4303	192.251	3.16526	0.000518091	0.122783	No	hypothetical protein MIMGU_mgv1a017508mg	Mimulus guttatus	NA	ATP hydrolysis coupled proton transport[GO:0015991]	hydrogen ion transmembrane transporter activity[GO:0015078]	proton-transporting V-type ATPase, V0 domain[GO:0033179] ; integral component of membrane[GO:0016021]	NA
TR31712|c0_g1_i5	10.7152	98.9252	3.20668	0.000671034	0.147904	No	NA	NA	NA	NA	NA	NA	NA
TR4029|c0_g1_i4	38.5746	362.104	3.23068	0.000153385	0.0570507	No	NA	NA	NA	NA	NA	NA	NA
TR44609|c8_g2_i1	27.8594	266.911	3.26012	0.000238625	0.0769925	No	NA	NA	NA	NA	NA	NA	NA
TR39035|c0_g1_i2	1988.74	19171	3.269	0.000557876	0.129912	No	hypothetical protein MIMGU_mgv1a005412mg	Mimulus guttatus	NA	proteolysis[GO:0006508]	peptidase activity[GO:0008233]	NA	NA
TR12042|c0_g1_i1	15.0012	153.054	3.35089	0.000364131	0.10319	No	PREDICTED: pleiotropic drug resistance protein 2-like	Sesamum indicum	NA	NA	NA	NA	NA
TR33176|c0_g7_i1	17.1443	194.117	3.50113	0.000172522	0.0611939	No	PREDICTED: glutathione transferase GST 23-like	Erythranthe guttatus	NA	NA	NA	NA	NA
TR44269|c0_g2_i4	113.581	18.6651	-2.6053	0.00382575	0.350869	No	PREDICTED: subtilisin-like protease	Sesamum indicum	NA	NA	NA	NA	NA
TR25334|c0_g1_i3	100.723	16.7986	-2.58397	0.00403453	0.360149	No	NA	NA	NA	NA	NA	NA	NA
TR2369|c0_g5_i1	111.438	18.6651	-2.57782	0.00416076	0.36774	No	PREDICTED: MIP18 family protein At1g68310	Sesamum indicum	NA	NA	NA	NA	NA
TR41456|c2_g2_i1	111.438	18.6651	-2.57782	0.00416076	0.368348	No	NA	NA	NA	NA	NA	NA	NA
TR30121|c1_g1_i1	132.868	22.3982	-2.56854	0.00410658	0.365363	No	hypothetical protein PHAVU_003G132300g	Phaseolus vulgaris	NA	translation[GO:0006412]	structural constituent of ribosome[GO:0003735]	ribosome[GO:0005840]	NA
TR37644|c0_g2_i1	143.583	24.2647	-2.56496	0.0040046	0.358074	No	hypothetical protein MIMGU_mgv1a007445mg	Mimulus guttatus	NA	glycine catabolic process[GO:0006546] ; methylation[GO:0032259]	aminomethyltransferase activity[GO:0004047] ; transaminase activity[GO:0008483]	NA	map00260:Glycine, serine and threonine metabolism(S-aminomethyldihydrolipoylprotein:(6S)-tetrahydrofolate aminomethyltransferase (ammonia-forming)[ec:2.1.2.10]) ; map00670:One carbon pool by folate(S-aminomethyldihydrolipoylprotein:(6S)-tetrahydrofolate aminomethyltransferase (ammonia-forming)[ec:2.1.2.10])
TR31019|c0_g4_i1	87.8644	14.9321	-2.55686	0.00417981	0.367001	No	NA	NA	NA	NA	NA	NA	NA
TR38712|c2_g3_i1	87.8644	14.9321	-2.55686	0.00417981	0.3664	No	PREDICTED: MADS-box protein SOC1-like	Sesamum indicum	NA	NA	NA	NA	NA
TR42870|c2_g3_i1	87.8644	14.9321	-2.55686	0.00417981	0.367604	No	NA	NA	NA	NA	NA	NA	NA
TR39670|c1_g1_i1	173.586	29.8642	-2.53916	0.00388251	0.352453	No	hypothetical protein MIMGU_mgv1a0032971mg, partial	Mimulus guttatus	NA	cell wall modification[GO:0042545] ; pectin catabolic process[GO:0045490]	pectinesterase activity[GO:0030599] ; aspartyl esterase activity[GO:0045330]	cell wall[GO:0005618]	map00500:Starch and sucrose metabolism(pectin demethoxylase[ec:3.1.1.11]) ; map00040:Pentose and glucuronate interconversions(pectin demethoxylase[ec:3.1.1.11])
TR31018|c0_g3_i1	171.443	29.8642	-2.52124	0.00413495	0.367277	No	NA	NA	NA	NA	NA	NA	NA
TR40055|c1_g2_i4	75.0062	13.0656	-2.52124	0.00423098	0.369676	No	3-hydroxy-3-methylglutaryl-coenzyme A reductase 3	Salvia miltiorrhiza	NA	coenzyme A metabolic process[GO:0015936] ; oxidation-reduction process[GO:0055114] ; isoprenoid biosynthetic process[GO:0008299]	hydroxymethylglutaryl-CoA reductase (NADPH) activity[GO:0004420] ; NADP binding[GO:0050661]	integral component of membrane[GO:0016021] ; endoplasmic reticulum membrane[GO:0005789]	map01130:Biosynthesis of antibiotics(reductase (NADPH)[ec:1.1.1.34]) ; map00900:Terpenoid backbone biosynthesis(reductase (NADPH)[ec:1.1.1.34])
TR3149|c0_g1_i2	150.012	26.1312	-2.52124	0.00446826	0.374522	No	O-methyltransferase	Mentha x piperita	NA	methylation[GO:0032259]	O-methyltransferase activity[GO:0008171] ; protein dimerization activity[GO:0046983]	NA	NA
TR38671|c1_g14_i1	150.012	26.1312	-2.52124	0.00446826	0.375109	No	PREDICTED: 60S ribosomal protein L6-like	Sesamum indicum	NA	NA	NA	NA	NA
TR39739|c0_g3_i1	96.4365	16.7986	-2.52124	0.00481816	0.393385	No	PREDICTED: interactor of constitutive active ROPs 1-like	Sesamum indicum	NA	NA	NA	NA	NA
TR39435|c1_g2_i4	117.867	20.5316	-2.52124	0.00490375	0.397947	No	PREDICTED: uncharacterized protein LOC105168902	Sesamum indicum	NA	NA	NA	NA	NA
TR38746|c0_g9_i1	180.015	31.7307	-2.50416	0.00423561	0.369478	No	NA	NA	NA	NA	NA	NA	NA
TR35174|c0_g1_i5	210.017	37.3303	-2.49209	0.00393548	0.35426	No	PREDICTED: glucan endo-1,3-beta-glucosidase-like	Sesamum indicum	NA	NA	NA	NA	NA
TR40956|c0_g1_i2	105.009	18.6651	-2.49209	0.00536918	0.416773	No	PREDICTED: ninja-family protein mc410	Sesamum indicum	NA	NA	NA	NA	NA
TR30636|c0_g1_i4	94.2935	16.7986	-2.48882	0.00527724	0.412626	No	NA	NA	NA	NA	NA	NA	NA
TR35714|c0_g2_i3	72.8631	13.0656	-2.47942	0.00470057	0.387924	No	PREDICTED: UDP-glycosyltransferase 87A1-like	Sesamum indicum	NA	NA	NA	NA	NA
TR38123|c3_g5_i1	72.8631	13.0656	-2.47942	0.00470057	0.387327	No	PREDICTED: fumarylacetoacetase	Sesamum indicum	NA	NA	NA	NA	NA
TR34803|c1_g1_i1	62.148	11.1991	-2.47233	0.00393032	0.354391	No	NA	NA	NA	NA	NA	NA	NA
TR30641|c0_g4_i8	154.298	27.9977	-2.46234	0.00526018	0.413102	No	PREDICTED: zinc finger CCCH domain-containing protein 53	Sesamum indicum	NA	NA	NA	NA	NA
TR35323|c3_g4_i2	102.866	18.6651	-2.46234	0.00585187	0.435919	No	PREDICTED: zinc-finger homeodomain protein 9	Sesamum indicum	NA	NA	NA	NA	NA
TR33723|c0_g1_i8	195.016	35.4637	-2.45918	0.00462234	0.383239	No	NA	NA	NA	NA	NA	NA	NA
TR7709|c1_g8_i1	92.1504	16.7986	-2.45565	0.00578877	0.434848	No	PREDICTED: squamosa promoter-binding-like protein 9	Sesamum indicum	NA	NA	NA	NA	NA
TR44360|c0_g3_i2	132.868	24.2647	-2.45307	0.00580683	0.435594	No	PREDICTED: histidine--tRNA ligase	Sesamum indicum	NA	NA	NA	NA	NA
TR33648|c0_g13_i1	203.588	37.3303	-2.44724	0.00464605	0.384609	No	NA	NA	NA	NA	NA	NA	NA
TR33674|c0_g1_i6	81.4353	14.9321	-2.44724	0.00562763	0.425728	No	NA	NA	NA	NA	NA	NA	NA
TR41508|c0_g10_i1	81.4353	14.9321	-2.44724	0.00562763	0.426331	No	NA	NA	NA	NA	NA	NA	NA
TR33805|c0_g3_i1	122.153	22.3982	-2.44724	0.00606847	0.444634	No	hypothetical protein MIMGU_mgv1a0056111mg, partial	Mimulus guttatus	NA	D-xylose metabolic process[GO:0042732] ; pentose-phosphate shunt[GO:0006098]	metal ion binding[GO:0046872] ; xylose isomerase activity[GO:0009045]	NA	map00051:Fructose and mannose metabolism(isomerase[ec:5.3.1.5]) ; map00040:Pentose and glucuronate interconversions(isomerase[ec:5.3.1.5])
TR42864|c2_g8_i6	122.153	22.3982	-2.44724	0.00606847	0.445243	No	NA	NA	NA	NA	NA	NA	NA
TR21823|c0_g1_i1	70.7201	13.0656	-2.43635	0.00522869	0.412442	No	hypothetical protein MIMGU_mgv1a000773mg	Mimulus guttatus	NA	posttranscriptional gene silencing by RNA[GO:0035194] ; regulation of nucleic acid-templated transcription[GO:1903506]	transcription cofactor activity[GO:0003712]	RISC complex[GO:0016442]	NA
TR31684|c0_g2_i1	141.44	26.1312	-2.43635	0.00594328	0.439672	No	SQUAMOSA promoter binding protein-like 3, partial	Salvia miltiorrhiza	NA	NA	DNA binding[GO:0003677]	nucleus[GO:0005634]	NA
TR28184|c0_g1_i5	100.723	18.6651	-2.43197	0.0063816	0.452714	No	NA	NA	NA	NA	NA	NA	NA
TR30071|c2_g1_i1	261.45	48.5293	-2.42961	0.00390724	0.352904	No	hypothetical protein MIMGU_mgv1a016201mg	Mimulus guttatus	NA	NA	NA	NA	NA
TR35393|c0_g2_i1	160.728	29.8642	-2.42813	0.00570514	0.430377	No	PREDICTED: PHD finger protein ALFIN-LIKE 1-like	Sesamum indicum	NA	NA	NA	NA	NA
TR34891|c0_g1_i1	60.0049	11.1991	-2.4217	0.00437444	0.374273	No	PREDICTED: formimidoyltransferase-cyclodeaminase	Sesamum indicum	NA	NA	NA	NA	NA
TR43588|c0_g1_i1	150.012	27.9977	-2.4217	0.0060339	0.444534	No	PREDICTED: trihelix transcription factor GT-2-like isoform X1	Sesamum indicum	NA	NA	NA	NA	NA
TR28049|c3_g2_i1	90.0074	16.7986	-2.4217	0.0063594	0.451737	No	NA	NA	NA	NA	NA	NA	NA
TR33658|c0_g3_i2	120.01	22.3982	-2.4217	0.0065715	0.458891	No	NA	NA	NA	NA	NA	NA	NA
TR38495|c0_g9_i2	120.01	22.3982	-2.4217	0.0065715	0.458294	No	PREDICTED: protein TIC 21, chloroplastic	Sesamum indicum	NA	NA	NA	NA	NA
TR7639|c0_g1_i3	169.3	31.7307	-2.41563	0.0057584	0.433783	No	PREDICTED: NADH dehydrogenase [ubiquinone] iron-sulfur protein 1, mitochondrial	Sesamum indicum	NA	NA	NA	NA	NA
TR3908|c0_g2_i11	158.584	29.8642	-2.40876	0.00609291	0.443392	No	PREDICTED: uncharacterized protein LOC105160865	Sesamum indicum	NA	NA	NA	NA	NA
TR43341|c0_g6_i7	158.584	29.8642	-2.40876	0.00609291	0.443995	No	PREDICTED: far upstream element-binding protein 2 isoform X2	Sesamum indicum	NA	NA	NA	NA	NA
TR33803|c2_g3_i3	207.874	39.1968	-2.4069	0.00518369	0.409496	No	PREDICTED: 14-3-3-like protein 16R	Sesamum indicum	NA	NA	NA	NA	NA
TR31276|c0_g1_i1	167.157	31.7307	-2.39725	0.00613145	0.443186	No	PREDICTED: uncharacterized protein LOC105164037	Sesamum indicum	NA	NA	NA	NA	NA
TR7313|c0_g1_i1	117.867	22.3982	-2.39571	0.00711996	0.473721	No	1-deoxy-D-xylulose 5-phosphate synthase	Plectranthus barbatus	Lamiaceae	terpenoid biosynthetic process[GO:0016114]	1-deoxy-D-xylulose-5-phosphate synthase activity[GO:0008661]	NA	map00730:Thiamine metabolism(synthase[ec:2.2.1.7]) ; map01130:Biosynthesis of antibiotics(synthase[ec:2.2.1.7]) ; map00900:Terpenoid backbone biosynthesis(synthase[ec:2.2.1.7])
TR41909|c0_g3_i4	205.731	39.1968	-2.39195	0.00547416	0.420052	No	PREDICTED: macrophage erythroblast attacher	Erythranthe guttatus	NA	NA	NA	NA	NA
TR7773|c0_g5_i1	68.5771	13.0656	-2.39195	0.00582337	0.435614	No	NA	NA	NA	NA	NA	NA	NA
TR33129|c0_g3_i4	137.154	26.1312	-2.39195	0.00687427	0.469625	No	NA	NA	NA	NA	NA	NA	NA
TR34680|c0_g2_i3	137.154	26.1312	-2.39195	0.00687427	0.469026	No	hypothetical protein MIMGU_mgv1a011761mg	Mimulus guttatus	NA	NA	NA	integral component of membrane[GO:0016021]	NA
TR7663|c0_g12_i1	225.019	42.9298	-2.38999	0.00511654	0.40659	No	hypothetical protein POPTR_0014s18940g	Populus trichocarpa	NA	translation[GO:0006412]	structural constituent of ribosome[GO:0003735]	cytosolic large ribosomal subunit[GO:0022625]	NA
TR25026|c0_g2_i1	87.8644	16.7986	-2.38694	0.00699672	0.471377	No	PREDICTED: ubiquitin-activating enzyme E1 1	Erythranthe guttatus	NA	NA	NA	NA	NA
TR44572|c1_g1_i14	107.152	20.5316	-2.38373	0.00742441	0.482587	No	hypothetical protein GLYMA_15G133600	Glycine max	NA	carbohydrate metabolic process[GO:0005975]	hydrolase activity, hydrolyzing O-glycosyl compounds[GO:0004553]	NA	NA
TR40824|c0_g1_i1	107.152	20.5316	-2.38373	0.00742441	0.483173	No	PREDICTED: thiol-disulfide oxidoreductase LTO1	Sesamum indicum	NA	NA	NA	NA	NA
TR32777|c0_g2_i1	165.014	31.7307	-2.37863	0.0065316	0.458496	No	PREDICTED: uncharacterized protein LOC105169335	Sesamum indicum	NA	NA	NA	NA	NA
TR42371|c0_g4_i1	57.8619	11.1991	-2.36923	0.0048727	0.396027	No	unnamed protein product	Coffea canephora	NA	carbohydrate metabolic process[GO:0005975]	hydrolase activity, hydrolyzing O-glycosyl compounds[GO:0004553] ; cation binding[GO:0043169]	NA	NA
TR43709|c0_g10_i1	250.735	48.5293	-2.36923	0.00494779	0.397903	No	PREDICTED: inactive protein kinase SELMODRAFT_444075	Sesamum indicum	NA	NA	NA	NA	NA
TR30237|c2_g5_i1	173.586	33.5972	-2.36923	0.00654113	0.458564	No	PREDICTED: 60S ribosomal protein L12-3	Sesamum indicum	NA	NA	NA	NA	NA
TR34923|c0_g3_i2	135.011	26.1312	-2.36923	0.00739848	0.483837	No	unnamed protein product	Coffea canephora	NA	translation[GO:0006412]	structural constituent of ribosome[GO:0003735]	ribosome[GO:0005840]	NA
TR33220|c0_g2_i8	115.724	22.3982	-2.36923	0.0077183	0.488643	No	hypothetical protein MIMGU_mgv1a011581mg	Mimulus guttatus	NA	NA	nucleic acid binding[GO:0003676] ; nucleotide binding[GO:0000166]	NA	NA
TR36633|c0_g4_i1	115.724	22.3982	-2.36923	0.0077183	0.489221	No	R2R3-MYB protein	Rehmannia glutinosa	NA	NA	DNA binding[GO:0003677]	NA	NA
TR3612|c2_g1_i3	143.583	27.9977	-2.35851	0.0074392	0.482377	No	hypothetical protein MIMGU_mgv1a016656mg	Mimulus guttatus	NA	NA	NA	NA	NA
TR38671|c1_g7_i2	143.583	27.9977	-2.35851	0.0074392	0.481794	No	PREDICTED: 60S ribosomal protein L6-like	Sesamum indicum	NA	NA	NA	NA	NA
TR41171|c0_g6_i1	143.583	27.9977	-2.35851	0.0074392	0.482962	No	PREDICTED: UDP-sulfoquinovose synthase, chloroplastic isoform X2	Sesamum indicum	NA	NA	NA	NA	NA
TR38377|c0_g3_i2	267.879	52.2624	-2.35774	0.00481449	0.393686	No	PREDICTED: uncharacterized protein LOC105163461	Sesamum indicum	NA	NA	NA	NA	NA
TR41883|c0_g4_i1	229.305	44.7963	-2.35581	0.00560323	0.425687	No	hypothetical protein MIMGU_mgv1a001484mg	Mimulus guttatus	NA	methylation[GO:0032259]	methyltransferase activity[GO:0008168]	integral component of membrane[GO:0016021]	NA
TR8118|c1_g2_i3	210.017	41.0633	-2.35459	0.00604884	0.445022	No	hypothetical protein MIMGU_mgv1a001909mg	Mimulus guttatus	NA	proteolysis[GO:0006508]	serine-type endopeptidase activity[GO:0004252]	NA	NA
TR35443|c0_g2_i2	85.7213	16.7986	-2.35131	0.00770941	0.489818	No	PREDICTED: potassium transporter 8-like	Sesamum indicum	NA	NA	NA	NA	NA
TR25024|c0_g1_i4	152.155	29.8642	-2.34906	0.00744206	0.480817	No	NA	NA	NA	NA	NA	NA	NA
TR32428|c1_g2_i2	218.589	42.9298	-2.34817	0.00597617	0.441495	No	NA	NA	NA	NA	NA	NA	NA
TR33095|c0_g6_i6	8844.3	1737.72	-2.34755	0.00428149	0.370463	No	PREDICTED: carbonic anhydrase, chloroplastic-like isoform X3	Citrus sinensis	NA	NA	NA	NA	NA
TR32855|c0_g3_i1	66.434	13.0656	-2.34615	0.006494	0.457055	No	PREDICTED: mitochondrial import receptor subunit TOM20 isoform X1	Sesamum indicum	NA	NA	NA	NA	NA
TR42175|c0_g1_i11	312.883	61.5949	-2.34474	0.0043017	0.371013	No	PREDICTED: uncharacterized protein LOC105170059	Sesamum indicum	NA	NA	NA	NA	NA
TR38598|c0_g2_i4	246.449	48.5293	-2.34436	0.00544341	0.420099	No	NA	NA	NA	NA	NA	NA	NA
TR42780|c0_g6_i4	160.728	31.7307	-2.34066	0.00742188	0.483596	No	NA	NA	NA	NA	NA	NA	NA
TR35442|c0_g1_i2	94.2935	18.6651	-2.33681	0.00832014	0.50697	No	NA	NA	NA	NA	NA	NA	NA
TR44133|c0_g1_i2	94.2935	18.6651	-2.33681	0.00832014	0.506394	No	PREDICTED: glycerophosphodiester phosphodiesterase GDPDL3-like	Sesamum indicum	NA	NA	NA	NA	NA
TR39552|c0_g1_i1	310.74	61.5949	-2.33482	0.00447684	0.374071	No	PREDICTED: probable methyltransferase PMT2	Sesamum indicum	NA	NA	NA	NA	NA
TR36026|c0_g1_i6	216.446	42.9298	-2.33396	0.00629578	0.448407	No	PREDICTED: sterol 14-demethylase-like	Sesamum indicum	NA	NA	NA	NA	NA
TR38411|c5_g7_i2	319.312	63.4614	-2.33101	0.00441332	0.374015	No	PREDICTED: malonyl-CoA-acyl carrier protein transacylase, mitochondrial	Erythranthe guttatus	NA	NA	NA	NA	NA
TR43167|c0_g1_i1	225.019	44.7963	-2.32859	0.00620033	0.445758	No	hypothetical protein MIMGU_mgv1a004912mg	Mimulus guttatus	NA	NA	NA	NA	NA
TR40908|c1_g3_i5	225.019	44.7963	-2.32859	0.00620033	0.44516	No	NA	NA	NA	NA	NA	NA	NA
TR25797|c0_g1_i1	75.0062	14.9321	-2.32859	0.00767457	0.490513	No	unnamed protein product	Coffea canephora	NA	translation[GO:0006412]	structural constituent of ribosome[GO:0003735]	ribosome[GO:0005840]	NA
TR42788|c1_g2_i8	75.0062	14.9321	-2.32859	0.00767457	0.489928	No	NA	NA	NA	NA	NA	NA	NA
TR43095|c2_g4_i1	75.0062	14.9321	-2.32859	0.00767457	0.491099	No	PREDICTED: dammarenediol II synthase-like	Sesamum indicum	NA	NA	NA	NA	NA
TR39263|c0_g1_i9	177.872	35.4637	-2.32642	0.00735275	0.4838	No	PREDICTED: mediator-associated protein 1-like	Sesamum indicum	NA	NA	NA	NA	NA
TR29957|c0_g3_i2	280.737	55.9954	-2.32584	0.00509843	0.405753	No	uncharacterized protein LOC100499870	Glycine max	NA	negative regulation of transcription, DNA-templated[GO:0045892] ; oxidation-reduction process[GO:0055114]	oxidoreductase activity[GO:0016491] ; FMN binding[GO:0010181]	NA	NA
TR29306|c1_g2_i4	102.866	20.5316	-2.32484	0.00879888	0.520163	No	O-methyltransferase	Mentha x piperita	NA	NA	methyltransferase activity[GO:0008168]	NA	NA
TR30731|c0_g4_i1	55.7189	11.1991	-2.31479	0.00543267	0.419875	No	hypothetical protein MIMGU_mgv1a016475mg	Mimulus guttatus	NA	NA	NA	NA	NA
TR40898|c0_g1_i1	83.5783	16.7986	-2.31479	0.0085074	0.513705	No	PREDICTED: endoglucanase 10-like	Sesamum indicum	NA	NA	NA	NA	NA
TR41868|c1_g4_i2	111.438	22.3982	-2.31479	0.00908488	0.527179	No	hypothetical protein MIMGU_mgv1a004149mg	Mimulus guttatus	NA	NA	NA	NA	NA
TR36184|c0_g2_i2	342.885	69.061	-2.31178	0.0043628	0.373874	No	NA	NA	NA	NA	NA	NA	NA
TR30662|c1_g1_i1	379.317	76.527	-2.30936	0.00389955	0.352804	No	PREDICTED: endoglucanase 6	Sesamum indicum	NA	NA	NA	NA	NA
TR39579|c2_g2_i2	120.01	24.2647	-2.30622	0.0092203	0.527043	No	hypothetical protein MIMGU_mgv1a010108mg	Mimulus guttatus	NA	protein phosphorylation[GO:0006468]	protein kinase activity[GO:0004672] ; ATP binding[GO:0005524]	NA	NA
TR2589|c0_g1_i3	92.1504	18.6651	-2.30365	0.00911524	0.526091	No	NA	NA	NA	NA	NA	NA	NA
TR40489|c1_g2_i1	92.1504	18.6651	-2.30365	0.00911524	0.526658	No	PREDICTED: amino acid permease 3 isoform X2	Sesamum indicum	NA	NA	NA	NA	NA
TR44720|c1_g3_i4	248.592	50.3959	-2.3024	0.00616718	0.44397	No	NA	NA	NA	NA	NA	NA	NA
TR2329|c0_g2_i1	220.732	44.7963	-2.30085	0.00686543	0.46962	No	PREDICTED: 40S ribosomal protein S23-like	Zea mays	NA	NA	NA	NA	NA
TR34765|c1_g1_i2	64.291	13.0656	-2.29884	0.00725151	0.479495	No	NA	NA	NA	NA	NA	NA	NA
TR33848|c0_g4_i1	192.873	39.1968	-2.29884	0.00762193	0.489485	No	hypothetical protein MIMGU_mgv1a008646mg	Mimulus guttatus	NA	metabolic process[GO:0008152]	hydrolase activity, acting on ester bonds[GO:0016788]	NA	NA
TR2563|c0_g2_i1	128.582	26.1312	-2.29884	0.00925055	0.528209	No	NA	NA	NA	NA	NA	NA	NA
TR29681|c0_g2_i1	128.582	26.1312	-2.29884	0.00925055	0.527646	No	NA	NA	NA	NA	NA	NA	NA
TR35714|c0_g2_i4	366.459	74.6605	-2.29523	0.00427007	0.370072	No	PREDICTED: UDP-glycosyltransferase 87A1-like	Sesamum indicum	NA	NA	NA	NA	NA
TR44137|c0_g1_i2	137.154	27.9977	-2.29242	0.00921083	0.527064	No	PREDICTED: putative SWI/SNF-related matrix-associated actin-dependent regulator of chromatin subfamily A member 3-like 3	Nicotiana sylvestris	NA	NA	NA	NA	NA
TR3385|c0_g1_i3	291.453	59.7284	-2.28677	0.0055826	0.425326	No	PREDICTED: 1-aminocyclopropane-1-carboxylate oxidase 5-like	Sesamum indicum	NA	NA	NA	NA	NA
TR15373|c0_g1_i1	72.8631	14.9321	-2.28677	0.00853536	0.513656	No	hypothetical protein B456_002G226600	Gossypium raimondii	NA	glutamate biosynthetic process[GO:0006537] ; oxidation-reduction process[GO:0055114]	glutamate synthase activity[GO:0015930]	NA	NA
TR31778|c0_g3_i1	72.8631	14.9321	-2.28677	0.00853536	0.514234	No	PREDICTED: plasminogen activator inhibitor 1 RNA-binding protein-like isoform X1	Sesamum indicum	NA	NA	NA	NA	NA
TR44606|c2_g1_i5	417.892	85.8596	-2.28308	0.00378014	0.347877	No	PREDICTED: phospholipase D alpha 1-like	Sesamum indicum	NA	NA	NA	NA	NA
TR40948|c1_g1_i2	190.73	39.1968	-2.28272	0.00805953	0.494465	No	hypothetical protein GLYMA_02G165000	Glycine max	NA	glycolytic process[GO:0006096]	potassium ion binding[GO:0030955] ; pyruvate kinase activity[GO:0004743] ; magnesium ion binding[GO:0000287] ; kinase activity[GO:0016301]	NA	map01130:Biosynthesis of antibiotics(kinase[ec:2.7.1.40]) ; map00620:Pyruvate metabolism(kinase[ec:2.7.1.40]) ; map00010:Glycolysis / Gluconeogenesis(kinase[ec:2.7.1.40]) ; map00230:Purine metabolism(kinase[ec:2.7.1.40])
TR31493|c0_g3_i2	154.298	31.7307	-2.28177	0.00902007	0.527418	No	PREDICTED: cytochrome P450 83B1-like	Solanum lycopersicum	NA	secondary metabolite biosynthetic process[GO:0044550] ; oxidation-reduction process[GO:0055114]	oxidoreductase activity, acting on paired donors, with incorporation or reduction of molecular oxygen, NAD(P)H as one donor, and incorporation of one atom of oxygen[GO:0016709] ; heme binding[GO:0020037] ; iron ion binding[GO:0005506]	membrane[GO:0016020]	NA
TR40545|c0_g6_i1	117.867	24.2647	-2.28023	0.00997695	0.547505	No	PREDICTED: protein trichome birefringence-like 34	Erythranthe guttatus	NA	NA	NA	NA	NA
TR42583|c1_g4_i2	126.439	26.1312	-2.2746	0.00997563	0.547995	No	CsPK1.1 family protein	Populus trichocarpa	NA	protein phosphorylation[GO:0006468]	protein kinase activity[GO:0004672] ; ATP binding[GO:0005524]	NA	NA
TR7023|c0_g1_i1	225.019	46.6628	-2.2697	0.00744134	0.481351	No	PREDICTED: uncharacterized protein LOC103326508	Prunus mume	NA	NA	NA	NA	NA
TR32743|c1_g1_i2	377.174	78.3935	-2.26642	0.00455041	0.378447	No	PREDICTED: arogenate dehydrogenase 2, chloroplastic-like	Sesamum indicum	NA	NA	NA	NA	NA
TR42222|c1_g1_i5	143.583	29.8642	-2.2654	0.00977925	0.543901	No	PREDICTED: subtilisin-like protease SBT5.3	Sesamum indicum	NA	NA	NA	NA	NA
TR32182|c0_g1_i2	222.875	46.6628	-2.25589	0.00782401	0.489549	No	NA	NA	NA	NA	NA	NA	NA
TR37602|c0_g4_i1	222.875	46.6628	-2.25589	0.00782401	0.490122	No	PREDICTED: endoplasmin homolog, partial	Nicotiana tomentosiformis	NA	NA	NA	NA	NA
TR43945|c0_g2_i3	240.02	50.3959	-2.25178	0.00745377	0.480993	No	PREDICTED: DNA replication ATP-dependent helicase/nuclease DNA2 isoform X1	Sesamum indicum	NA	NA	NA	NA	NA
TR39049|c0_g14_i9	195.016	41.0633	-2.24767	0.0088327	0.521012	No	PREDICTED: xyloglucan endotransglucosylase/hydrolase protein 24-like isoform X1	Sesamum indicum	NA	NA	NA	NA	NA
TR42825|c0_g5_i2	132.868	27.9977	-2.24661	0.0106459	0.563989	No	NA	NA	NA	NA	NA	NA	NA
TR36207|c0_g1_i1	203.588	42.9298	-2.2456	0.00863662	0.515694	No	NA	NA	NA	NA	NA	NA	NA
TR18620|c0_g1_i1	70.7201	14.9321	-2.2437	0.00950692	0.535426	No	predicted protein	Hordeum vulgare subsp. vulgare	NA	microtubule-based process[GO:0007017]	structural constituent of cytoskeleton[GO:0005200] ; GTP binding[GO:0005525]	microtubule[GO:0005874]	NA
TR28927|c0_g1_i1	70.7201	14.9321	-2.2437	0.00950692	0.53599	No	hypothetical protein CICLE_v10032980mg	Citrus clementina	NA	translation[GO:0006412]	structural constituent of ribosome[GO:0003735] ; nucleotide binding[GO:0000166]	ribosome[GO:0005840]	NA
TR41811|c1_g2_i5	158.584	33.5972	-2.23884	0.0101012	0.552625	No	NA	NA	NA	NA	NA	NA	NA
TR33865|c1_g4_i7	79.2922	16.7986	-2.23884	0.0104067	0.558498	No	NA	NA	NA	NA	NA	NA	NA
TR42279|c0_g2_i1	79.2922	16.7986	-2.23884	0.0104067	0.557939	No	PREDICTED: embryogenesis-associated protein EMB8	Sesamum indicum	NA	NA	NA	NA	NA
TR39652|c0_g2_i3	87.8644	18.6651	-2.23493	0.0109903	0.572609	No	PREDICTED: growth-regulating factor 6-like	Sesamum indicum	NA	NA	NA	NA	NA
TR43484|c2_g1_i4	184.301	39.1968	-2.23326	0.00954006	0.535603	No	PREDICTED: auxin response factor 3	Sesamum indicum	NA	NA	NA	NA	NA
TR44625|c2_g2_i2	210.017	44.7963	-2.22906	0.00888236	0.520502	No	NA	NA	NA	NA	NA	NA	NA
TR24427|c0_g1_i3	105.009	22.3982	-2.22906	0.0116512	0.589828	No	PREDICTED: 3-ketoacyl-CoA synthase 6-like	Elaeis guineensis	NA	NA	NA	NA	NA
TR40960|c1_g2_i1	113.581	24.2647	-2.22679	0.0117005	0.589538	No	GDS_OCIBARecName: Full=Germacrene-D synthase; AltName: Full=(-)-germacrene D synthase	Ocimum basilicum	Lamiaceae	terpenoid biosynthetic process[GO:0016114]	magnesium ion binding[GO:0000287] ; terpene synthase activity[GO:0010333]	NA	NA
TR35824|c1_g8_i1	113.581	24.2647	-2.22679	0.0117005	0.588984	No	NA	NA	NA	NA	NA	NA	NA
TR34503|c1_g2_i1	244.306	52.2624	-2.22484	0.00798257	0.493133	No	unnamed protein product	Coffea canephora	NA	glycolytic process[GO:0006096]	fructose-bisphosphate aldolase activity[GO:0004332]	NA	map00030:Pentose phosphate pathway(aldolase[ec:4.1.2.13]) ; map01130:Biosynthesis of antibiotics(aldolase[ec:4.1.2.13]) ; map00051:Fructose and mannose metabolism(aldolase[ec:4.1.2.13]) ; map00710:Carbon fixation in photosynthetic organisms(aldolase[ec:4.1.2.13]) ; map00010:Glycolysis / Gluconeogenesis(aldolase[ec:4.1.2.13]) ; map00680:Methane metabolism(aldolase[ec:4.1.2.13])
TR29249|c0_g1_i6	130.725	27.9977	-2.22316	0.0114534	0.585908	No	PREDICTED: ABC transporter G family member 32-like	Sesamum indicum	NA	NA	NA	NA	NA
TR39429|c0_g1_i4	130.725	27.9977	-2.22316	0.0114534	0.586468	No	PREDICTED: UDP-glucuronic acid decarboxylase 4-like	Musa acuminata subsp. malaccensis	NA	NA	NA	NA	NA
TR39736|c0_g3_i2	156.441	33.5972	-2.21921	0.0107668	0.567588	No	PREDICTED: glutaredoxin domain-containing cysteine-rich protein 1-like	Sesamum indicum	NA	NA	NA	NA	NA
TR39387|c1_g2_i1	51.4328	11.1991	-2.19931	0.00678535	0.464736	No	PREDICTED: ABC transporter G family member 11	Nelumbo nucifera	NA	NA	NA	NA	NA
TR40525|c0_g2_i6	51.4328	11.1991	-2.19931	0.00678535	0.465927	No	NA	NA	NA	NA	NA	NA	NA
TR41605|c0_g2_i1	51.4328	11.1991	-2.19931	0.00678535	0.465331	No	unnamed protein product	Coffea canephora	NA	NA	NA	NA	NA
TR35176|c0_g1_i2	300.025	65.328	-2.19931	0.00721389	0.477597	No	PREDICTED: anthocyanidin 3-O-glucosyltransferase 5-like	Sesamum indicum	NA	NA	NA	NA	NA
TR30655|c2_g1_i3	291.453	63.4614	-2.19931	0.00740389	0.483601	No	NA	NA	NA	NA	NA	NA	NA
TR42175|c0_g1_i9	282.88	61.5949	-2.19931	0.00760443	0.489535	No	NA	NA	NA	NA	NA	NA	NA
TR40323|c0_g2_i2	265.736	57.8619	-2.19931	0.0080377	0.494259	No	PREDICTED: uncharacterized protein LOC104226710	Nicotiana sylvestris	NA	NA	NA	NA	NA
TR18682|c0_g1_i1	60.0049	13.0656	-2.19931	0.00908118	0.529258	No	PREDICTED: GDSL esterase/lipase At2g04570	Sesamum indicum	NA	NA	NA	NA	NA
TR39837|c3_g4_i2	60.0049	13.0656	-2.19931	0.00908118	0.528683	No	NA	NA	NA	NA	NA	NA	NA
TR40369|c1_g5_i2	60.0049	13.0656	-2.19931	0.00908118	0.527536	No	omega-3 fatty acid desaturase endoplasmic reticulum isozyme 3	Musa AB Group	NA	lipid metabolic process[GO:0006629]	NA	NA	NA
TR42028|c0_g1_i3	60.0049	13.0656	-2.19931	0.00908118	0.528109	No	PREDICTED: probable serine/threonine-protein kinase At4g35230 isoform X1	Sesamum indicum	NA	NA	NA	NA	NA
TR40015|c0_g1_i1	60.0049	13.0656	-2.19931	0.00908118	0.529835	No	PREDICTED: uncharacterized protein LOC105167168	Sesamum indicum	NA	NA	NA	NA	NA
TR38123|c3_g10_i2	214.303	46.6628	-2.19931	0.00957681	0.537103	No	PREDICTED: fumarylacetoacetase	Sesamum indicum	NA	NA	NA	NA	NA
TR35380|c0_g5_i1	68.5771	14.9321	-2.19931	0.0106054	0.56464	No	NA	NA	NA	NA	NA	NA	NA
TR40908|c1_g3_i7	180.015	39.1968	-2.19931	0.0106859	0.564436	No	Protein RRP5-like protein	Morus notabilis	NA	mRNA processing[GO:0006397]	nucleic acid binding[GO:0003676]	nucleus[GO:0005634]	NA
TR37213|c0_g6_i3	77.1492	16.7986	-2.19931	0.0115362	0.587338	No	PREDICTED: palmitoyl-acyl carrier protein thioesterase, chloroplastic	Sesamum indicum	NA	NA	NA	NA	NA
TR43913|c1_g2_i1	77.1492	16.7986	-2.19931	0.0115362	0.587897	No	PREDICTED: ABC transporter B family member 1	Sesamum indicum	NA	NA	NA	NA	NA
TR42550|c0_g5_i2	137.154	29.8642	-2.19931	0.0120605	0.597556	No	PREDICTED: pentatricopeptide repeat-containing protein At5g25630	Sesamum indicum	NA	NA	NA	NA	NA
TR35502|c1_g2_i7	85.7213	18.6651	-2.19931	0.0120953	0.598177	No	PREDICTED: caffeoylshikimate esterase-like	Sesamum indicum	NA	NA	NA	NA	NA
TR40908|c1_g3_i2	85.7213	18.6651	-2.19931	0.0120953	0.597625	No	hypothetical protein MIMGU_mgv1a000210mg	Mimulus guttatus	NA	NA	NA	membrane[GO:0016020]	NA
TR2994|c0_g1_i1	128.582	27.9977	-2.19931	0.0123282	0.602464	No	MYB-related transcription factor	Salvia miltiorrhiza	NA	NA	NA	NA	NA
TR39536|c0_g5_i2	120.01	26.1312	-2.19931	0.0125481	0.607117	No	PREDICTED: nuclear transcription factor Y subunit A-5-like	Sesamum indicum	NA	NA	NA	NA	NA
TR43095|c2_g14_i2	102.866	22.3982	-2.19931	0.0126739	0.609347	No	PREDICTED: dammarenediol II synthase-like	Sesamum indicum	NA	NA	NA	NA	NA
TR34821|c1_g4_i1	102.866	22.3982	-2.19931	0.0126739	0.6088	No	NA	NA	NA	NA	NA	NA	NA
TR7878|c0_g2_i2	340.742	74.6605	-2.19026	0.00658692	0.458176	No	PREDICTED: protein EARLY RESPONSIVE TO DEHYDRATION 15	Sesamum indicum	NA	NA	NA	NA	NA
TR42812|c3_g9_i1	306.454	67.1945	-2.18926	0.0073121	0.48231	No	fructose-1,6-bisphosphatase	Flaveria linearis	NA	dephosphorylation[GO:0016311] ; carbohydrate metabolic process[GO:0005975]	fructose 1,6-bisphosphate 1-phosphatase activity[GO:0042132]	NA	map00030:Pentose phosphate pathway(hexose diphosphatase[ec:3.1.3.11]) ; map01130:Biosynthesis of antibiotics(hexose diphosphatase[ec:3.1.3.11]) ; map00051:Fructose and mannose metabolism(hexose diphosphatase[ec:3.1.3.11]) ; map00710:Carbon fixation in photosynthetic organisms(hexose diphosphatase[ec:3.1.3.11]) ; map00010:Glycolysis / Gluconeogenesis(hexose diphosphatase[ec:3.1.3.11]) ; map00680:M…
TR40005|c0_g5_i1	280.737	61.5949	-2.18834	0.00792744	0.491997	No	NA	NA	NA	NA	NA	NA	NA
TR33004|c0_g2_i2	263.593	57.8619	-2.18763	0.00839645	0.508726	No	cytochrome P450 CYP77A27	Salvia miltiorrhiza	NA	oxidation-reduction process[GO:0055114]	heme binding[GO:0020037] ; oxidoreductase activity, acting on paired donors, with incorporation or reduction of molecular oxygen[GO:0016705] ; monooxygenase activity[GO:0004497] ; iron ion binding[GO:0005506]	integral component of membrane[GO:0016021]	NA
TR38432|c0_g3_i2	415.748	91.4591	-2.18451	0.00536229	0.416842	No	PREDICTED: proliferating cell nuclear antigen	Sesamum indicum	NA	NA	NA	NA	NA
TR44006|c0_g4_i3	177.872	39.1968	-2.18203	0.011313	0.585433	No	PREDICTED: kinesin-like protein NACK1	Sesamum indicum	NA	NA	NA	NA	NA
TR32811|c0_g1_i2	330.027	72.794	-2.18069	0.0070202	0.472364	No	PREDICTED: protein trichome birefringence-like 41	Sesamum indicum	NA	NA	NA	NA	NA
TR33822|c0_g3_i1	152.155	33.5972	-2.17913	0.0122483	0.601853	No	hypothetical protein L484_003714	Morus notabilis	NA	NA	NA	NA	NA
TR41470|c1_g5_i2	287.166	63.4614	-2.17794	0.0080314	0.494439	No	hypothetical protein M569_06257, partial	Genlisea aurea	NA	transport[GO:0006810]	NA	integral component of membrane[GO:0016021]	NA
TR39670|c1_g1_i4	396.461	87.7261	-2.1761	0.00583469	0.435245	No	PREDICTED: probable pectinesterase/pectinesterase inhibitor 61	Sesamum indicum	NA	NA	NA	NA	NA
TR43631|c0_g3_i1	109.295	24.2647	-2.17129	0.0137524	0.625808	No	NA	NA	NA	NA	NA	NA	NA
TR3552|c0_g2_i1	100.723	22.3982	-2.16894	0.013795	0.625095	No	NA	NA	NA	NA	NA	NA	NA
TR3915|c1_g2_i2	184.301	41.0633	-2.16614	0.0116394	0.589791	No	hypothetical protein MIMGU_mgv1a011356mg	Mimulus guttatus	NA	proteolysis[GO:0006508]	ATP-dependent peptidase activity[GO:0004176]	NA	NA
TR33927|c0_g4_i1	259.307	57.8619	-2.16398	0.00916617	0.526195	No	NA	NA	NA	NA	NA	NA	NA
TR36270|c0_g1_i1	167.157	37.3303	-2.16278	0.0123151	0.60292	No	PREDICTED: thymidine kinase-like isoform X1	Erythranthe guttatus	NA	NA	NA	NA	NA
TR29224|c0_g3_i1	83.5783	18.6651	-2.16278	0.0133317	0.616088	No	hypothetical protein MIMGU_mgv1a014965mg	Mimulus guttatus	NA	translation[GO:0006412]	structural constituent of ribosome[GO:0003735]	ribosome[GO:0005840]	NA
TR38747|c0_g4_i2	83.5783	18.6651	-2.16278	0.0133317	0.61662	No	PREDICTED: leucine-rich repeat extensin-like protein 4	Sesamum indicum	NA	NA	NA	NA	NA
TR26443|c0_g1_i1	400.747	89.5926	-2.16124	0.00606109	0.445312	No	PREDICTED: uncharacterized protein LOC105172861	Sesamum indicum	NA	NA	NA	NA	NA
TR31774|c2_g3_i7	317.169	70.9275	-2.16083	0.00777493	0.488762	No	NA	NA	NA	NA	NA	NA	NA
TR40105|c0_g2_i1	308.597	69.061	-2.15978	0.00799217	0.493158	No	hypothetical protein MIMGU_mgv1a024409mg	Mimulus guttatus	NA	tryptophan biosynthetic process[GO:0000162]	tryptophan synthase activity[GO:0004834]	NA	map00260:Glycine, serine and threonine metabolism(synthase[ec:4.2.1.20]) ; map01130:Biosynthesis of antibiotics(synthase[ec:4.2.1.20]) ; map00400:Phenylalanine, tyrosine and tryptophan biosynthesis(synthase[ec:4.2.1.20])
TR33020|c0_g6_i2	383.603	85.8596	-2.15956	0.00640805	0.45279	No	PREDICTED: 50S ribosomal protein L12, chloroplastic-like	Sesamum indicum	NA	NA	NA	NA	NA
TR27472|c0_g1_i1	75.0062	16.7986	-2.15867	0.0128084	0.610334	No	hypothetical protein MIMGU_mgv1a001861mg	Mimulus guttatus	NA	fatty acid biosynthetic process[GO:0006633]	acetyl-CoA carboxylase activity[GO:0003989]	acetyl-CoA carboxylase complex[GO:0009317]	map00640:Propanoate metabolism(carboxylase[ec:6.4.1.2]) ; map00254:Aflatoxin biosynthesis(carboxylase[ec:6.4.1.2]) ; map00253:Tetracycline biosynthesis(carboxylase[ec:6.4.1.2]) ; map00061:Fatty acid biosynthesis(carboxylase[ec:6.4.1.2]) ; map01130:Biosynthesis of antibiotics(carboxylase[ec:6.4.1.2]) ; map00720:Carbon fixation pathways in prokaryotes(carboxylase[ec:6.4.1.2]) ; map00620:Pyruvate me…
TR30848|c1_g2_i2	75.0062	16.7986	-2.15867	0.0128084	0.609792	No	NA	NA	NA	NA	NA	NA	NA
TR40326|c0_g1_i1	75.0062	16.7986	-2.15867	0.0128084	0.60925	No	PREDICTED: mitogen-activated protein kinase kinase kinase YODA-like	Sesamum indicum	NA	NA	NA	NA	NA
TR41171|c0_g4_i2	66.434	14.9321	-2.15351	0.01185	0.593163	No	PREDICTED: UDP-sulfoquinovose synthase, chloroplastic isoform X1	Sesamum indicum	NA	NA	NA	NA	NA
TR41915|c0_g4_i1	66.434	14.9321	-2.15351	0.01185	0.592609	No	NA	NA	NA	NA	NA	NA	NA
TR34257|c0_g1_i1	190.73	42.9298	-2.15148	0.0119222	0.594002	No	Biotin Carboxyl Carrier Protein	Salvia miltiorrhiza	NA	fatty acid biosynthetic process[GO:0006633]	acetyl-CoA carboxylase activity[GO:0003989]	acetyl-CoA carboxylase complex[GO:0009317]	map00640:Propanoate metabolism(carboxylase[ec:6.4.1.2]) ; map00254:Aflatoxin biosynthesis(carboxylase[ec:6.4.1.2]) ; map00253:Tetracycline biosynthesis(carboxylase[ec:6.4.1.2]) ; map00061:Fatty acid biosynthesis(carboxylase[ec:6.4.1.2]) ; map01130:Biosynthesis of antibiotics(carboxylase[ec:6.4.1.2]) ; map00720:Carbon fixation pathways in prokaryotes(carboxylase[ec:6.4.1.2]) ; map00620:Pyruvate me…
TR2906|c1_g1_i2	240.02	54.1289	-2.14868	0.0102374	0.55554	No	PREDICTED: NADP-dependent malic enzyme, chloroplastic-like	Sesamum indicum	NA	NA	NA	NA	NA
TR42803|c0_g2_i2	240.02	54.1289	-2.14868	0.0102374	0.556103	No	PREDICTED: zinc finger CCCH domain-containing protein 18-like	Sesamum indicum	NA	NA	NA	NA	NA
TR39140|c0_g1_i1	694.343	156.787	-2.14684	0.00384553	0.350284	No	Ca2+ antiporter cation exchanger, partial	Olea europaea	NA	NA	NA	membrane[GO:0016020]	NA
TR31618|c1_g4_i1	57.8619	13.0656	-2.14684	0.010187	0.556186	No	PREDICTED: 40S ribosomal protein S5	Nicotiana tomentosiformis	NA	NA	NA	NA	NA
TR42670|c0_g1_i1	57.8619	13.0656	-2.14684	0.010187	0.555619	No	hypothetical protein MIMGU_mgv1a001346mg	Mimulus guttatus	NA	acetyl-CoA biosynthetic process from acetate[GO:0019427]	AMP binding[GO:0016208] ; ATP binding[GO:0005524] ; acetate-CoA ligase activity[GO:0003987]	NA	map00640:Propanoate metabolism(ligase[ec:6.2.1.1]) ; map01130:Biosynthesis of antibiotics(ligase[ec:6.2.1.1]) ; map00720:Carbon fixation pathways in prokaryotes(ligase[ec:6.2.1.1]) ; map00620:Pyruvate metabolism(ligase[ec:6.2.1.1]) ; map00010:Glycolysis / Gluconeogenesis(ligase[ec:6.2.1.1]) ; map00680:Methane metabolism(ligase[ec:6.2.1.1])
TR43996|c1_g2_i6	57.8619	13.0656	-2.14684	0.010187	0.555054	No	hypothetical protein MIMGU_mgv1a024322mg, partial	Mimulus guttatus	NA	protein phosphorylation[GO:0006468]	ATP binding[GO:0005524] ; protein serine/threonine kinase activity[GO:0004674]	integral component of membrane[GO:0016021]	NA
TR33871|c0_g5_i4	115.724	26.1312	-2.14684	0.0146601	0.64625	No	hypothetical protein B456_010G049900	Gossypium raimondii	NA	NA	NA	NA	NA
TR38712|c2_g1_i8	115.724	26.1312	-2.14684	0.0146601	0.645718	No	NA	NA	NA	NA	NA	NA	NA
TR32182|c0_g3_i7	115.724	26.1312	-2.14684	0.0146601	0.645188	No	hypothetical protein MIMGU_mgv1a007680mg	Mimulus guttatus	NA	NA	DNA binding[GO:0003677]	nucleus[GO:0005634]	NA
TR29138|c1_g1_i1	495.041	111.991	-2.14417	0.00508379	0.4064	No	beta-1,3-glucanase	Vitis riparia	NA	NA	hydrolase activity[GO:0016787]	NA	NA
TR43880|c1_g1_i3	156.441	35.4637	-2.14121	0.0134993	0.62009	No	hypothetical protein LR48_Vigan02g003700	Vigna angularis	NA	NA	nucleic acid binding[GO:0003676]	NA	NA
TR41672|c0_g1_i1	49.2898	11.1991	-2.13791	0.00762461	0.488486	No	unnamed protein product	Coffea canephora	NA	regulation of transcription, DNA-templated[GO:0006355] ; transcription, DNA-templated[GO:0006351]	DNA binding[GO:0003677]	nucleus[GO:0005634]	NA
TR43022|c4_g6_i1	49.2898	11.1991	-2.13791	0.00762461	0.489071	No	PREDICTED: uncharacterized protein LOC105968380	Erythranthe guttatus	NA	NA	NA	NA	NA
TR37720|c0_g1_i4	246.449	55.9954	-2.13791	0.0103582	0.557014	No	NA	NA	NA	NA	NA	NA	NA
TR43142|c2_g3_i1	98.5795	22.3982	-2.13791	0.0150252	0.650567	No	NA	NA	NA	NA	NA	NA	NA
TR38847|c2_g2_i8	287.166	65.328	-2.13611	0.00916821	0.525748	No	PREDICTED: mitogen-activated protein kinase kinase kinase 2-like	Sesamum indicum	NA	NA	NA	NA	NA
TR35174|c0_g1_i1	90.0074	20.5316	-2.13219	0.0149294	0.649041	No	PREDICTED: glucan endo-1,3-beta-glucosidase-like	Sesamum indicum	NA	NA	NA	NA	NA
TR43164|c4_g2_i2	383.603	87.7261	-2.12854	0.00710981	0.474223	No	PREDICTED: uncharacterized protein LOC105174543	Sesamum indicum	NA	NA	NA	NA	NA
TR37305|c0_g3_i3	252.878	57.8619	-2.12776	0.010465	0.559943	No	enolase	Solanum lycopersicum	NA	glycolytic process[GO:0006096]	magnesium ion binding[GO:0000287] ; phosphopyruvate hydratase activity[GO:0004634]	phosphopyruvate hydratase complex[GO:0000015]	map01130:Biosynthesis of antibiotics(hydratase[ec:4.2.1.11]) ; map00010:Glycolysis / Gluconeogenesis(hydratase[ec:4.2.1.11]) ; map00680:Methane metabolism(hydratase[ec:4.2.1.11])
TR7709|c1_g9_i2	700.772	160.52	-2.12619	0.0041382	0.366957	No	SQUAMOSA promoter binding protein-like 6, partial	Salvia miltiorrhiza	NA	NA	DNA binding[GO:0003677]	nucleus[GO:0005634]	NA
TR41106|c1_g5_i5	488.612	111.991	-2.12531	0.00551119	0.421084	No	PREDICTED: uncharacterized protein LOC105160704 isoform X1	Sesamum indicum	NA	NA	NA	NA	NA
TR40214|c0_g2_i1	203.588	46.6628	-2.12531	0.012374	0.602503	No	PREDICTED: probable tRNA N6-adenosine threonylcarbamoyltransferase	Sesamum indicum	NA	NA	NA	NA	NA
TR7402|c0_g4_i1	203.588	46.6628	-2.12531	0.012374	0.601956	No	PREDICTED: heat shock protein 90-2, partial	Cucumis melo	NA	NA	NA	NA	NA
TR38177|c0_g5_i2	162.871	37.3303	-2.12531	0.0138868	0.627659	No	PREDICTED: uncharacterized protein LOC105162455	Sesamum indicum	NA	NA	NA	NA	NA
TR34303|c1_g5_i2	81.4353	18.6651	-2.12531	0.014717	0.646632	No	phi-1	Nicotiana tabacum	NA	NA	NA	NA	NA
TR40179|c3_g4_i1	81.4353	18.6651	-2.12531	0.014717	0.646102	No	1,3 beta glucanase, partial	Musa acuminata AAA Group	NA	metabolic process[GO:0008152]	hydrolase activity, acting on glycosyl bonds[GO:0016798]	NA	NA
TR3071|c0_g2_i1	195.016	44.7963	-2.12214	0.0128281	0.608568	No	unnamed protein product	Coffea canephora	NA	NA	heme binding[GO:0020037] ; metal ion binding[GO:0046872]	integral component of membrane[GO:0016021]	NA
TR40262|c0_g7_i3	332.17	76.527	-2.11788	0.00855506	0.513687	No	PREDICTED: double-stranded RNA-binding protein 2-like	Sesamum indicum	NA	NA	NA	NA	NA
TR31500|c2_g1_i1	72.8631	16.7986	-2.11685	0.0142435	0.638395	No	PREDICTED: beta-galactosidase-like	Sesamum indicum	NA	NA	NA	NA	NA
TR39429|c0_g3_i2	72.8631	16.7986	-2.11685	0.0142435	0.637861	No	PREDICTED: UDP-glucuronic acid decarboxylase 4-like	Brassica oleracea var. oleracea	NA	NA	NA	NA	NA
TR39972|c2_g1_i1	72.8631	16.7986	-2.11685	0.0142435	0.637328	No	NA	NA	NA	NA	NA	NA	NA
TR37628|c0_g1_i8	501.47	115.724	-2.11548	0.00556279	0.424421	No	NA	NA	NA	NA	NA	NA	NA
TR42273|c0_g7_i1	210.017	48.5293	-2.11358	0.0125513	0.606719	No	3-hydroxy-3-methylglutaryl coenzyme A synthase, partial	Picrorhiza kurrooa	NA	isoprenoid biosynthetic process[GO:0008299]	hydroxymethylglutaryl-CoA synthase activity[GO:0004421]	NA	map00072:Synthesis and degradation of ketone bodies(synthase[ec:2.3.3.10]) ; map01130:Biosynthesis of antibiotics(synthase[ec:2.3.3.10]) ; map00280:Valine, leucine and isoleucine degradation(synthase[ec:2.3.3.10]) ; map00650:Butanoate metabolism(synthase[ec:2.3.3.10]) ; map00900:Terpenoid backbone biosynthesis(synthase[ec:2.3.3.10])
TR40269|c0_g2_i1	105.009	24.2647	-2.11358	0.0162018	0.665977	No	PREDICTED: U-box domain-containing protein 9-like	Sesamum indicum	NA	NA	NA	NA	NA
TR35417|c0_g4_i2	242.163	55.9954	-2.1126	0.0113444	0.585364	No	PREDICTED: uncharacterized protein At4g15545	Vigna radiata var. radiata	NA	NA	NA	NA	NA
TR36798|c1_g3_i1	242.163	55.9954	-2.1126	0.0113444	0.585928	No	PREDICTED: uncharacterized protein LOC105159021	Sesamum indicum	NA	NA	NA	NA	NA
TR42768|c0_g4_i2	274.308	63.4614	-2.11185	0.0102802	0.556169	No	PREDICTED: DNA primase small subunit	Sesamum indicum	NA	NA	NA	NA	NA
TR32425|c1_g1_i1	137.154	31.7307	-2.11185	0.0154735	0.652567	No	NA	NA	NA	NA	NA	NA	NA
TR42015|c0_g7_i3	435.036	100.792	-2.10976	0.00658666	0.458753	No	PREDICTED: protein TRANSPARENT TESTA 12-like	Sesamum indicum	NA	NA	NA	NA	NA
TR2548|c0_g2_i1	64.291	14.9321	-2.1062	0.013263	0.615568	No	NA	NA	NA	NA	NA	NA	NA
TR30125|c0_g2_i1	64.291	14.9321	-2.1062	0.013263	0.616637	No	PREDICTED: LOW QUALITY PROTEIN: omega-hydroxypalmitate O-feruloyl transferase	Sesamum indicum	NA	NA	NA	NA	NA
TR36166|c0_g5_i3	64.291	14.9321	-2.1062	0.013263	0.616102	No	hypothetical protein BVRB_2g025590 isoform B	Beta vulgaris subsp. vulgaris	NA	metabolic process[GO:0008152]	hydrolase activity[GO:0016787]	NA	NA
TR39312|c0_g3_i1	64.291	14.9321	-2.1062	0.013263	0.614503	No	NA	NA	NA	NA	NA	NA	NA
TR43427|c0_g4_i5	64.291	14.9321	-2.1062	0.013263	0.615035	No	PREDICTED: neutral alpha-glucosidase C	Sesamum indicum	NA	NA	NA	NA	NA
TR3589|c2_g4_i2	96.4365	22.3982	-2.1062	0.0163763	0.668534	No	NA	NA	NA	NA	NA	NA	NA
TR44036|c0_g1_i1	96.4365	22.3982	-2.1062	0.0163763	0.669044	No	PREDICTED: leucine--tRNA ligase, cytoplasmic	Sesamum indicum	NA	NA	NA	NA	NA
TR34533|c0_g3_i1	216.446	50.3959	-2.10263	0.0127009	0.607916	No	NA	NA	NA	NA	NA	NA	NA
TR36419|c0_g1_i7	216.446	50.3959	-2.10263	0.0127009	0.60846	No	PREDICTED: gamma-interferon-inducible lysosomal thiol reductase isoform X2	Sesamum indicum	NA	NA	NA	NA	NA
TR36845|c5_g2_i3	304.311	70.9275	-2.10113	0.00975334	0.543589	No	PREDICTED: homeobox-leucine zipper protein ATHB-13	Sesamum indicum	NA	NA	NA	NA	NA
TR36505|c0_g2_i1	120.01	27.9977	-2.09977	0.0166307	0.667723	No	PREDICTED: 33 kDa ribonucleoprotein, chloroplastic	Sesamum indicum	NA	NA	NA	NA	NA
TR40019|c0_g2_i1	120.01	27.9977	-2.09977	0.0166307	0.668725	No	hypothetical protein PHAVU_011G1771000g, partial	Phaseolus vulgaris	NA	tetrapyrrole biosynthetic process[GO:0033014] ; peptidyl-pyrromethane cofactor linkage[GO:0018160]	hydroxymethylbilane synthase activity[GO:0004418]	NA	map00860:Porphyrin and chlorophyll metabolism(synthase[ec:2.5.1.61])
TR41088|c0_g8_i2	120.01	27.9977	-2.09977	0.0166307	0.668224	No	unknown	Lotus japonicus	NA	metabolic process[GO:0008152]	transferase activity, transferring acyl groups other than amino-acyl groups[GO:0016747]	NA	NA
TR2414|c0_g1_i1	87.8644	20.5316	-2.09743	0.0163803	0.66768	No	NA	NA	NA	NA	NA	NA	NA
TR25373|c1_g2_i3	87.8644	20.5316	-2.09743	0.0163803	0.668188	No	NA	NA	NA	NA	NA	NA	NA
TR36348|c0_g12_i1	87.8644	20.5316	-2.09743	0.0163803	0.667172	No	40S ribosomal protein S9-2	Zostera marina	NA	translation[GO:0006412]	structural constituent of ribosome[GO:0003735] ; rRNA binding[GO:0019843]	small ribosomal subunit[GO:0015935]	NA
TR35637|c1_g1_i1	143.583	33.5972	-2.09547	0.0159333	0.660518	No	hypothetical protein MIMGU_mgv1a010118mg	Mimulus guttatus	NA	NA	NA	membrane[GO:0016020]	NA
TR31348|c0_g1_i1	278.594	65.328	-2.09239	0.0107816	0.567252	No	PREDICTED: 10 kDa chaperonin-like	Sesamum indicum	NA	NA	NA	NA	NA
TR22051|c0_g1_i1	55.7189	13.0656	-2.09239	0.0114487	0.587349	No	40S ribosomal protein S30	Medicago truncatula	NA	translation[GO:0006412]	structural constituent of ribosome[GO:0003735]	ribosome[GO:0005840]	NA
TR38395|c0_g3_i4	55.7189	13.0656	-2.09239	0.0114487	0.586787	No	NA	NA	NA	NA	NA	NA	NA
TR38673|c1_g1_i4	222.875	52.2624	-2.09239	0.0128261	0.609015	No	PREDICTED: uncharacterized protein LOC105159671 isoform X1	Sesamum indicum	NA	NA	NA	NA	NA
TR36665|c0_g3_i1	167.157	39.1968	-2.09239	0.0150991	0.650089	No	PREDICTED: uncharacterized protein LOC105165459 isoform X2	Sesamum indicum	NA	NA	NA	NA	NA
TR35759|c2_g1_i5	111.438	26.1312	-2.09239	0.0171645	0.678475	No	NA	NA	NA	NA	NA	NA	NA
TR39093|c0_g3_i1	111.438	26.1312	-2.09239	0.0171645	0.677974	No	PREDICTED: UDP-glycosyltransferase 76C4-like	Sesamum indicum	NA	NA	NA	NA	NA
TR37628|c0_g1_i9	428.607	100.792	-2.08828	0.00720531	0.477619	No	PREDICTED: ribonucleoside-diphosphate reductase small chain	Sesamum indicum	NA	NA	NA	NA	NA
TR40132|c0_g1_i1	158.584	37.3303	-2.08683	0.0156846	0.655789	No	NA	NA	NA	NA	NA	NA	NA
TR42656|c0_g2_i3	79.2922	18.6651	-2.08683	0.0162715	0.667308	No	PREDICTED: putative nitric oxide synthase isoform X2	Sesamum indicum	NA	NA	NA	NA	NA
TR8147|c0_g3_i2	364.316	85.8596	-2.08514	0.00867284	0.516704	No	PREDICTED: auxin response factor 18-like	Sesamum indicum	NA	NA	NA	NA	NA
TR3237|c0_g1_i6	467.181	110.124	-2.08485	0.00665427	0.461661	No	PREDICTED: uncharacterized protein LOC105175296	Sesamum indicum	NA	NA	NA	NA	NA
TR34973|c1_g8_i4	102.866	24.2647	-2.08383	0.0176017	0.686632	No	PREDICTED: uncharacterized protein LOC105175213	Sesamum indicum	NA	NA	NA	NA	NA
TR42437|c0_g1_i1	197.159	46.6628	-2.07901	0.0144588	0.643737	No	PREDICTED: uncharacterized protein LOC105949092	Erythranthe guttatus	NA	NA	NA	NA	NA
TR3424|c0_g2_i1	512.185	121.323	-2.07781	0.00624063	0.445664	No	hypothetical protein M569_01919, partial	Genlisea aurea	NA	metabolic process[GO:0008152]	ATPase activity[GO:0016887] ; ATP binding[GO:0005524]	NA	map00230:Purine metabolism(adenylpyrophosphatase[ec:3.6.1.3])
TR23182|c0_g2_i3	527.186	125.056	-2.07573	0.00613105	0.443755	No	PREDICTED: putative phosphatidylglycerol/phosphatidylinositol transfer protein DDB_G0282179	Sesamum indicum	NA	NA	NA	NA	NA
TR3472|c0_g1_i2	259.307	61.5949	-2.07378	0.0120961	0.597113	No	ferredoxin	Ocimum basilicum	Lamiaceae	electron transport chain[GO:0022900]	metal ion binding[GO:0046872] ; electron carrier activity[GO:0009055] ; 2 iron, 2 sulfur cluster binding[GO:0051537]	NA	NA
TR36622|c3_g6_i5	70.7201	16.7986	-2.07378	0.0158655	0.660775	No	NA	NA	NA	NA	NA	NA	NA
TR42723|c2_g6_i6	70.7201	16.7986	-2.07378	0.0158655	0.660261	No	NA	NA	NA	NA	NA	NA	NA
TR41193|c0_g4_i5	321.455	76.527	-2.07058	0.0102593	0.555598	No	PREDICTED: transcription factor bHLH143-like	Sesamum indicum	NA	NA	NA	NA	NA
TR43986|c2_g7_i3	297.882	70.9275	-2.07032	0.010937	0.571498	No	hypothetical protein EUTSA_v10000938mg	Eutrema salsugineum	NA	NA	NA	NA	NA
TR26184|c0_g1_i2	1026.51	244.513	-2.06977	0.00425078	0.368998	No	hypothetical protein MIMGU_mgv1a016621mg	Mimulus guttatus	NA	lipid transport[GO:0006869]	lipid binding[GO:0008289]	NA	NA
TR42943|c0_g3_i1	180.015	42.9298	-2.06806	0.0156752	0.655911	No	PREDICTED: zinc phosphodiesterase ELAC protein 2-like isoform X2	Nicotiana sylvestris	NA	NA	NA	NA	NA
TR37567|c0_g2_i1	555.046	132.522	-2.06637	0.00609083	0.444448	No	PREDICTED: HAUS augmin-like complex subunit 1	Sesamum indicum	NA	NA	NA	NA	NA
TR42649|c2_g10_i7	555.046	132.522	-2.06637	0.00609083	0.445055	No	PREDICTED: uncharacterized protein LOC105168700	Sesamum indicum	NA	NA	NA	NA	NA
TR21949|c0_g3_i1	132.868	31.7307	-2.06604	0.0177882	0.686906	No	RL31_PERFRRecName: Full=60S ribosomal protein L31	Perilla frutescens	Lamiaceae	translation[GO:0006412]	structural constituent of ribosome[GO:0003735]	ribosome[GO:0005840]	NA
TR43864|c1_g2_i3	992.225	237.047	-2.06549	0.00437753	0.37394	No	hypothetical protein MIMGU_mgv1a001601mg	Mimulus guttatus	NA	metabolic process[GO:0008152]	catalytic activity[GO:0003824]	NA	NA
TR36764|c0_g5_i2	109.295	26.1312	-2.06438	0.0185885	0.689953	No	PREDICTED: probable 3-hydroxyisobutyrate dehydrogenase-like 1, mitochondrial	Sesamum indicum	NA	NA	NA	NA	NA
TR8234|c0_g2_i1	109.295	26.1312	-2.06438	0.0185885	0.69091	No	PREDICTED: ecotropic viral integration site 5 protein homolog	Sesamum indicum	NA	NA	NA	NA	NA
TR3247|c1_g3_i1	109.295	26.1312	-2.06438	0.0185885	0.690431	No	PREDICTED: uncharacterized protein C9orf85 homolog	Sesamum indicum	NA	NA	NA	NA	NA
TR40015|c0_g5_i6	304.311	72.794	-2.06365	0.0109783	0.573096	No	PREDICTED: uncharacterized protein LOC105167168	Sesamum indicum	NA	NA	NA	NA	NA
TR36139|c0_g1_i2	171.443	41.0633	-2.06181	0.0163136	0.668011	No	PREDICTED: polyol transporter 5-like	Sesamum indicum	NA	NA	NA	NA	NA
TR21522|c0_g2_i1	85.7213	20.5316	-2.06181	0.0179994	0.689097	No	hypothetical protein MIMGU_mgv1a006489mg	Mimulus guttatus	NA	metabolic process[GO:0008152]	GDP-D-glucose phosphorylase activity[GO:0080048]	NA	NA
TR25270|c0_g1_i1	85.7213	20.5316	-2.06181	0.0179994	0.688113	No	hypothetical protein MIMGU_mgv1a006337mg	Mimulus guttatus	NA	NA	NA	integral component of membrane[GO:0016021]	NA
TR27412|c0_g1_i1	85.7213	20.5316	-2.06181	0.0179994	0.68959	No	PREDICTED: thioredoxin H2-like	Sesamum indicum	NA	NA	NA	NA	NA
TR27827|c0_g1_i3	85.7213	20.5316	-2.06181	0.0179994	0.688605	No	NA	NA	NA	NA	NA	NA	NA
TR37761|c3_g2_i5	85.7213	20.5316	-2.06181	0.0179994	0.687623	No	hypothetical protein MIMGU_mgv1a000643mg	Mimulus guttatus	NA	metabolic process[GO:0008152]	N-acetyltransferase activity[GO:0008080]	NA	NA
TR41454|c1_g2_i3	295.739	70.9275	-2.05991	0.011365	0.5853	No	NA	NA	NA	NA	NA	NA	NA
TR34940|c0_g4_i2	147.869	35.4637	-2.05991	0.0174155	0.682852	No	NA	NA	NA	NA	NA	NA	NA
TR2188|c0_g5_i1	62.148	14.9321	-2.05729	0.0148713	0.647567	No	PREDICTED: uncharacterized protein LOC105177909	Sesamum indicum	NA	NA	NA	NA	NA
TR32102|c0_g2_i1	62.148	14.9321	-2.05729	0.0148713	0.64968	No	PREDICTED: uncharacterized protein LOC105170557 isoform X3	Sesamum indicum	NA	NA	NA	NA	NA
TR35921|c0_g3_i1	62.148	14.9321	-2.05729	0.0148713	0.649151	No	PREDICTED: uncharacterized protein LOC105160964	Sesamum indicum	NA	NA	NA	NA	NA
TR40960|c1_g3_i4	62.148	14.9321	-2.05729	0.0148713	0.648622	No	NA	NA	NA	NA	NA	NA	NA
TR7996|c0_g3_i3	62.148	14.9321	-2.05729	0.0148713	0.648094	No	NA	NA	NA	NA	NA	NA	NA
TR38518|c0_g1_i9	186.444	44.7963	-2.05729	0.0158866	0.660114	No	hypothetical protein MIMGU_mgv1a015137mg	Mimulus guttatus	NA	NA	NA	NA	NA
TR40126|c0_g3_i1	124.296	29.8642	-2.05729	0.0185768	0.691432	No	NA	NA	NA	NA	NA	NA	NA
TR26211|c0_g1_i2	240.02	57.8619	-2.05247	0.0136872	0.6255	No	photoperiodic response / GIGANTEA	Plantago major	NA	NA	NA	NA	NA
TR36677|c0_g1_i3	240.02	57.8619	-2.05247	0.0136872	0.626034	No	PREDICTED: PI-PLC X domain-containing protein At5g67130-like isoform X2	Erythranthe guttatus	NA	NA	NA	NA	NA
TR28527|c0_g1_i2	139.297	33.5972	-2.05175	0.0182201	0.686264	No	PREDICTED: histidine-containing phosphotransfer protein 1-like	Nicotiana sylvestris	NA	NA	NA	NA	NA
TR37720|c0_g1_i7	177.872	42.9298	-2.05079	0.0165666	0.666648	No	hypothetical protein MIMGU_mgv1a023469mg, partial	Mimulus guttatus	NA	oxidation-reduction process[GO:0055114]	oxidoreductase activity[GO:0016491]	NA	NA
TR42338|c0_g2_i6	177.872	42.9298	-2.05079	0.0165666	0.667149	No	BnaAnng28680D, partial	Brassica napus	NA	protein refolding[GO:0042026]	ATP binding[GO:0005524]	cytoplasm[GO:0005737]	NA
TR29676|c0_g3_i1	255.021	61.5949	-2.04973	0.0131816	0.616061	No	PREDICTED: H/ACA ribonucleoprotein complex subunit 3-like protein-like	Fragaria vesca subsp. vesca	NA	NA	NA	NA	NA
TR40137|c0_g1_i4	38.5746	9.33257	-2.04731	0.00528525	0.41205	No	NA	NA	NA	NA	NA	NA	NA
TR40268|c0_g4_i4	192.873	46.6628	-2.04731	0.0160537	0.663456	No	NA	NA	NA	NA	NA	NA	NA
TR33469|c1_g3_i4	154.298	37.3303	-2.04731	0.0177438	0.686674	No	PREDICTED: glutathione S-transferase DHAR3, chloroplastic, partial	Erythranthe guttatus	NA	NA	NA	NA	NA
TR32646|c0_g1_i3	154.298	37.3303	-2.04731	0.0177438	0.686178	No	PREDICTED: transcription initiation factor TFIID subunit 15b	Erythranthe guttatus	NA	NA	NA	NA	NA
TR26675|c0_g1_i1	77.1492	18.6651	-2.04731	0.0180187	0.683969	No	GTP-binding protein beta subunit	Salvia miltiorrhiza	NA	signal transduction[GO:0007165]	NA	NA	NA
TR27679|c0_g1_i1	77.1492	18.6651	-2.04731	0.0180187	0.684454	No	NA	NA	NA	NA	NA	NA	NA
TR39604|c2_g1_i3	77.1492	18.6651	-2.04731	0.0180187	0.68494	No	phototropin 2	Verbena perennis	NA	phosphorelay signal transduction system[GO:0000160] ; signal transduction by protein phosphorylation[GO:0023014]	phosphorelay sensor kinase activity[GO:0000155]	intracellular[GO:0005622]	NA
TR39814|c0_g1_i4	77.1492	18.6651	-2.04731	0.0180187	0.685913	No	hypothetical protein M569_11340, partial	Genlisea aurea	NA	translation[GO:0006412]	structural constituent of ribosome[GO:0003735]	ribosome[GO:0005840]	NA
TR40369|c1_g4_i1	77.1492	18.6651	-2.04731	0.0180187	0.686401	No	hypothetical protein MIMGU_mgv1a027096mg	Mimulus guttatus	NA	lipid metabolic process[GO:0006629] ; oxidation-reduction process[GO:0055114]	oxidoreductase activity[GO:0016491]	integral component of membrane[GO:0016021]	NA
TR41380|c0_g5_i2	77.1492	18.6651	-2.04731	0.0180187	0.685426	No	PREDICTED: LOW QUALITY PROTEIN: uncharacterized protein ycf45	Erythranthe guttatus	NA	NA	NA	NA	NA
TR32829|c1_g5_i4	115.724	27.9977	-2.04731	0.019375	0.705936	No	Malate dehydrogenase	Morus notabilis	NA	carbohydrate metabolic process[GO:0005975] ; malate metabolic process[GO:0006108] ; tricarboxylic acid cycle[GO:0006099]	L-malate dehydrogenase activity[GO:0030060]	NA	map00630:Glyoxylate and dicarboxylate metabolism(dehydrogenase[ec:1.1.1.37]) ; map01130:Biosynthesis of antibiotics(dehydrogenase[ec:1.1.1.37]) ; map00720:Carbon fixation pathways in prokaryotes(dehydrogenase[ec:1.1.1.37]) ; map00020:Citrate cycle (TCA cycle)(dehydrogenase[ec:1.1.1.37]) ; map00620:Pyruvate metabolism(dehydrogenase[ec:1.1.1.37]) ; map00270:Cysteine and methionine metabolism(dehydr…
TR3612|c1_g1_i2	115.724	27.9977	-2.04731	0.019375	0.706417	No	hypothetical protein LR48_Vigan09g200600	Vigna angularis	NA	metal ion transport[GO:0030001]	metal ion binding[GO:0046872]	NA	NA
TR39821|c0_g2_i3	285.023	69.061	-2.04514	0.012253	0.601533	No	PREDICTED: T-complex protein 1 subunit eta-like	Populus euphratica	NA	NA	NA	NA	NA
TR30432|c0_g1_i2	246.449	59.7284	-2.0448	0.0137312	0.625375	No	PREDICTED: dual specificity phosphatase Cdc25-like	Solanum tuberosum	NA	NA	NA	NA	NA
TR7834|c0_g1_i4	207.874	50.3959	-2.04433	0.015485	0.652539	No	PREDICTED: tetraspanin-2	Sesamum indicum	NA	NA	NA	NA	NA
TR37482|c0_g1_i1	169.3	41.0633	-2.04366	0.0172704	0.680151	No	zinc finger protein CONSTANS-LIKE 7	Lagerstroemia indica	NA	NA	zinc ion binding[GO:0008270]	intracellular[GO:0005622]	NA
TR33263|c0_g9_i2	130.725	31.7307	-2.04258	0.0190854	0.698712	No	unnamed protein product	Coffea canephora	NA	NA	nucleic acid binding[GO:0003676] ; nucleotide binding[GO:0000166]	NA	NA
TR21755|c0_g1_i4	92.1504	22.3982	-2.04061	0.0195059	0.708295	No	hypothetical protein MIMGU_mgv1a012895mg	Mimulus guttatus	NA	ubiquitin-dependent protein catabolic process[GO:0006511]	threonine-type endopeptidase activity[GO:0004298]	cytoplasm[GO:0005737] ; proteasome core complex, alpha-subunit complex[GO:0019773] ; nucleus[GO:0005634]	NA
TR36873|c0_g2_i1	145.726	35.4637	-2.03884	0.01858	0.691074	No	NA	NA	NA	NA	NA	NA	NA
TR2589|c0_g11_i2	306.454	74.6605	-2.03725	0.0118603	0.592573	No	NA	NA	NA	NA	NA	NA	NA
TR35386|c0_g2_i1	53.5758	13.0656	-2.03581	0.0128936	0.610592	No	NA	NA	NA	NA	NA	NA	NA
TR33478|c0_g1_i1	107.152	26.1312	-2.03581	0.0201423	0.715398	No	NA	NA	NA	NA	NA	NA	NA
TR42246|c0_g7_i8	175.729	42.9298	-2.0333	0.0175122	0.685136	No	PREDICTED: MAP7 domain-containing protein 1	Sesamum indicum	NA	NA	NA	NA	NA
TR38738|c0_g2_i3	122.153	29.8642	-2.0322	0.0199971	0.713078	No	PREDICTED: arginine biosynthesis bifunctional protein ArgJ, chloroplastic isoform X2	Sesamum indicum	NA	NA	NA	NA	NA
TR43677|c0_g7_i1	122.153	29.8642	-2.0322	0.0199971	0.712603	No	NA	NA	NA	NA	NA	NA	NA
TR31705|c0_g2_i8	435.036	106.391	-2.03175	0.00859285	0.514802	No	hypothetical protein POPTR_1112s00210g	Populus trichocarpa	NA	NA	protein heterodimerization activity[GO:0046982] ; DNA binding[GO:0003677]	nucleosome[GO:0000786] ; nucleus[GO:0005634]	NA
TR44630|c1_g1_i2	983.652	240.78	-2.03043	0.00504365	0.404398	No	PREDICTED: ABC transporter G family member 32-like	Sesamum indicum	NA	NA	NA	NA	NA
TR35982|c0_g7_i1	68.5771	16.7986	-2.02938	0.0177024	0.687057	No	hypothetical protein B456_009G237900	Gossypium raimondii	NA	NA	calcium ion binding[GO:0005509] ; calcium-dependent phospholipid binding[GO:0005544]	NA	NA
TR39334|c1_g4_i1	68.5771	16.7986	-2.02938	0.0177024	0.686063	No	hypothetical protein LR48_Vigan08g005200	Vigna angularis	NA	multicellular organismal development[GO:0007275] ; protein ubiquitination[GO:0016567] ; ubiquitin-dependent protein catabolic process[GO:0006511]	ligase activity[GO:0016874] ; zinc ion binding[GO:0008270]	nucleus[GO:0005634]	NA
TR30985|c0_g1_i7	68.5771	16.7986	-2.02938	0.0177024	0.686559	No	PREDICTED: sulfiredoxin, chloroplastic/mitochondrial isoform X1	Sesamum indicum	NA	NA	NA	NA	NA
TR33950|c0_g4_i3	137.154	33.5972	-2.02938	0.0194964	0.708912	No	NA	NA	NA	NA	NA	NA	NA
TR35797|c0_g1_i1	137.154	33.5972	-2.02938	0.0194964	0.708432	No	PREDICTED: probable envelope ADP,ATP carrier protein, chloroplastic	Sesamum indicum	NA	NA	NA	NA	NA
TR28030|c1_g1_i4	906.503	222.115	-2.029	0.00524023	0.412139	No	NA	NA	NA	NA	NA	NA	NA
TR39670|c1_g1_i2	304.311	74.6605	-2.02713	0.0123088	0.603165	No	PREDICTED: probable pectinesterase/pectinesterase inhibitor 61	Sesamum indicum	NA	NA	NA	NA	NA
TR42365|c1_g3_i1	402.89	98.9252	-2.02598	0.009484	0.535826	No	PREDICTED: cytochrome P450 86A7	Sesamum indicum	NA	NA	NA	NA	NA
TR8118|c1_g2_i6	1307.25	321.04	-2.02571	0.00478722	0.392054	No	hypothetical protein MIMGU_mgv1a001909mg	Mimulus guttatus	NA	proteolysis[GO:0006508]	serine-type endopeptidase activity[GO:0004252]	NA	NA
TR41384|c1_g5_i4	83.5783	20.5316	-2.02528	0.0198084	0.71204	No	PREDICTED: histone-lysine N-methyltransferase, H3 lysine-9 specific SUVH1-like	Sesamum indicum	NA	NA	NA	NA	NA
TR37910|c0_g1_i3	98.5795	24.2647	-2.02243	0.020815	0.726762	No	NA	NA	NA	NA	NA	NA	NA
TR43670|c1_g1_i4	98.5795	24.2647	-2.02243	0.020815	0.727236	No	PREDICTED: alpha,alpha-trehalose-phosphate synthase [UDP-forming] 5 isoform X2	Sesamum indicum	NA	NA	NA	NA	NA
TR28694|c0_g1_i3	113.581	27.9977	-2.02034	0.0209291	0.72932	No	PREDICTED: hypersensitive-induced response protein 1	Sesamum indicum	NA	NA	NA	NA	NA
TR40436|c0_g1_i2	445.751	110.124	-2.01711	0.00880984	0.520237	No	PREDICTED: FRIGIDA-like protein 3	Sesamum indicum	NA	NA	NA	NA	NA
TR4051|c1_g1_i1	203.588	50.3959	-2.01428	0.0171136	0.677963	No	PREDICTED: filament-like plant protein 3	Sesamum indicum	NA	NA	NA	NA	NA
TR43937|c2_g2_i1	218.589	54.1289	-2.01375	0.0163864	0.666913	No	NA	NA	NA	NA	NA	NA	NA
TR33730|c1_g4_i2	443.608	110.124	-2.01015	0.00906317	0.52936	No	PREDICTED: myb family transcription factor APL-like	Sesamum indicum	NA	NA	NA	NA	NA
TR21422|c0_g1_i1	45.0037	11.1991	-2.00666	0.00978417	0.541924	No	PREDICTED: uncharacterized protein LOC102578961	Solanum tuberosum	NA	NA	NA	trans-Golgi network[GO:0005802] ; integral component of membrane[GO:0016021] ; vacuolar membrane[GO:0005774] ; endosome[GO:0005768] ; plasma membrane[GO:0005886]	NA
TR29089|c0_g1_i3	45.0037	11.1991	-2.00666	0.00978417	0.54361	No	hypothetical protein MIMGU_mgv1a003740mg	Mimulus guttatus	NA	NA	NA	NA	NA
TR30466|c1_g1_i1	45.0037	11.1991	-2.00666	0.00978417	0.543047	No	PREDICTED: uncharacterized protein LOC100261165	Vitis vinifera	NA	NA	NA	NA	NA
TR3909|c1_g3_i1	45.0037	11.1991	-2.00666	0.00978417	0.541364	No	unknown	Medicago truncatula	NA	NA	RNA binding[GO:0003723]	ribosome[GO:0005840]	NA
TR42349|c1_g1_i3	45.0037	11.1991	-2.00666	0.00978417	0.542485	No	NA	NA	NA	NA	NA	NA	NA
TR36930|c3_g2_i2	60.0049	14.9321	-2.00666	0.0167072	0.66729	No	PREDICTED: F-box/FBD/LRR-repeat protein At1g13570-like isoform X2	Sesamum indicum	NA	NA	NA	NA	NA
TR40162|c2_g1_i1	60.0049	14.9321	-2.00666	0.0167072	0.668287	No	NA	NA	NA	NA	NA	NA	NA
TR7688|c1_g1_i1	60.0049	14.9321	-2.00666	0.0167072	0.667788	No	PREDICTED: regulation of nuclear pre-mRNA domain-containing protein 2-like	Sesamum indicum	NA	NA	NA	NA	NA
TR40369|c1_g5_i1	180.015	44.7963	-2.00666	0.0186856	0.693074	No	PREDICTED: delta(8)-fatty-acid desaturase 2-like	Sesamum indicum	NA	NA	NA	NA	NA
TR41915|c0_g3_i4	165.014	41.0633	-2.00666	0.0193759	0.705488	No	PREDICTED: ultraviolet-B receptor UVR8 isoform X1	Sesamum indicum	NA	NA	NA	NA	NA
TR17368|c0_g1_i1	75.0062	18.6651	-2.00666	0.0199855	0.714093	No	hypothetical protein L484_010561	Morus notabilis	NA	NA	NA	NA	NA
TR37435|c2_g3_i2	75.0062	18.6651	-2.00666	0.0199855	0.713141	No	hypothetical protein PRUPE_ppa008061mg	Prunus persica	NA	NA	NA	integral component of membrane[GO:0016021]	NA
TR44683|c2_g8_i1	75.0062	18.6651	-2.00666	0.0199855	0.713617	No	PREDICTED: FACT complex subunit SPT16-like	Sesamum indicum	NA	NA	NA	NA	NA
TR43971|c0_g1_i4	150.012	37.3303	-2.00666	0.0201057	0.715049	No	PREDICTED: CSC1-like protein ERD4	Sesamum indicum	NA	NA	NA	NA	NA
TR33256|c0_g1_i1	90.0074	22.3982	-2.00666	0.0213324	0.735239	No	hypothetical protein AALP_AA4G185700	Arabis alpina	NA	ribosome biogenesis[GO:0042254]	NA	ribosome[GO:0005840]	NA
TR41879|c0_g1_i7	90.0074	22.3982	-2.00666	0.0213324	0.734766	No	PREDICTED: uncharacterized protein LOC105172591 isoform X1	Sesamum indicum	NA	NA	NA	NA	NA
TR43912|c2_g4_i2	90.0074	22.3982	-2.00666	0.0213324	0.735712	No	PREDICTED: translation initiation factor IF-2, chloroplastic	Nicotiana sylvestris	NA	NA	NA	NA	NA
TR7490|c0_g2_i6	90.0074	22.3982	-2.00666	0.0213324	0.734294	No	PREDICTED: probable histone H2A variant 3	Sesamum indicum	NA	NA	NA	NA	NA
TR3478|c0_g1_i4	120.01	29.8642	-2.00666	0.0215366	0.733311	No	hypothetical protein MIMGU_mgv1a010549mg	Mimulus guttatus	NA	NA	NA	NA	NA
TR38132|c1_g2_i6	120.01	29.8642	-2.00666	0.0215366	0.733778	No	PREDICTED: diacylglycerol kinase 3-like	Sesamum indicum	NA	NA	NA	NA	NA
TR33746|c0_g2_i3	105.009	26.1312	-2.00666	0.0218389	0.733808	No	PREDICTED: chromatin structure-remodeling complex subunit RSC1-like	Sesamum indicum	NA	NA	NA	NA	NA
TR42904|c0_g7_i1	105.009	26.1312	-2.00666	0.0218389	0.734268	No	PREDICTED: CTL-like protein DDB_G0274487	Sesamum indicum	NA	NA	NA	NA	NA
TR2750|c4_g2_i1	777.921	194.117	-2.00269	0.00623509	0.446459	No	histone H4.3	Zea mays	NA	nucleosome assembly[GO:0006334]	DNA binding[GO:0003677] ; protein heterodimerization activity[GO:0046982]	nucleosome[GO:0000786] ; nucleus[GO:0005634]	NA
TR3516|c1_g1_i6	145.726	203.45	0.481413	0.54551	1.11436	No	PREDICTED: 3-deoxy-manno-octulosonate cytidylyltransferase, mitochondrial	Sesamum indicum	NA	NA	NA	NA	NA
TR36125|c1_g1_i6	135.011	188.518	0.481623	0.549054	1.11637	No	hypothetical protein MIMGU_mgv1a008123mg	Mimulus guttatus	NA	metabolic process[GO:0008152]	hydrolase activity[GO:0016787]	NA	NA
TR37183|c0_g1_i3	124.296	173.586	0.481869	0.552816	1.11626	No	unnamed protein product	Vitis vinifera	NA	NA	NA	NA	NA
TR38083|c0_g2_i3	1656.56	2314.48	0.482491	0.498002	1.12189	No	PREDICTED: protochlorophyllide reductase	Sesamum indicum	NA	NA	NA	NA	NA
TR3597|c0_g1_i1	390.032	545.022	0.482721	0.497647	1.12208	No	hypothetical protein MIMGU_mgv1a012710mg	Mimulus guttatus	NA	metabolic process[GO:0008152]	catalytic activity[GO:0003824]	NA	NA
TR39374|c0_g6_i3	92.1504	128.789	0.482951	0.56435	1.11184	No	unnamed protein product	Coffea canephora	NA	NA	NA	NA	NA
TR31360|c0_g1_i2	162.871	227.715	0.483501	0.538291	1.11428	No	hypothetical protein CISIN_1g031513mg	Citrus sinensis	NA	NA	structural constituent of ribosome[GO:0003735]	mitochondrion[GO:0005739]	NA
TR33829|c0_g1_i4	81.4353	113.857	0.483501	0.567741	1.11235	No	PREDICTED: glutathione S-transferase T1	Sesamum indicum	NA	NA	NA	NA	NA
TR2390|c0_g1_i2	315.026	440.497	0.483662	0.503869	1.12143	No	PREDICTED: uncharacterized protein LOC104089428	Nicotiana tomentosiformis	NA	NA	NA	NA	NA
TR2261|c0_g1_i1	222.875	311.708	0.483956	0.519901	1.12232	No	putative L24 ribosomal protein	Arachis hypogaea	NA	translation[GO:0006412]	structural constituent of ribosome[GO:0003735]	large ribosomal subunit[GO:0015934]	NA
TR3806|c0_g2_i1	141.44	197.85	0.484218	0.544549	1.115	No	PREDICTED: GATA transcription factor 26-like	Solanum tuberosum	NA	NA	NA	NA	NA
TR40646|c0_g2_i1	70.7201	98.9252	0.484218	0.57139	1.10951	No	PREDICTED: NF-kappa-B-activating protein	Sesamum indicum	NA	NA	NA	NA	NA
TR3647|c0_g1_i8	70.7201	98.9252	0.484218	0.57139	1.10935	No	PREDICTED: putative ribonuclease H protein At1g65750-like	Citrus sinensis	NA	NA	NA	NA	NA
TR39752|c0_g1_i1	653.625	914.591	0.484664	0.485783	1.12503	No	hypothetical protein MIMGU_mgv1a010526mg	Mimulus guttatus	NA	NA	NA	NA	NA
TR37139|c0_g2_i4	130.725	182.918	0.484664	0.548008	1.11551	No	PREDICTED: plastidial pyruvate kinase 2-like	Sesamum indicum	NA	NA	NA	NA	NA
TR34337|c0_g2_i3	4151.06	5810.46	0.485173	0.533685	1.11561	No	PREDICTED: glutamine synthetase cytosolic isozyme	Sesamum indicum	NA	NA	NA	NA	NA
TR26361|c1_g1_i1	60.0049	83.9931	0.485189	0.57452	1.10601	No	PREDICTED: LOW QUALITY PROTEIN: alanine--tRNA ligase	Sesamum indicum	NA	NA	NA	NA	NA
TR33775|c0_g7_i1	60.0049	83.9931	0.485189	0.57452	1.1062	No	PREDICTED: RNA polymerase II C-terminal domain phosphatase-like 1	Sesamum indicum	NA	NA	NA	NA	NA
TR41208|c0_g4_i3	60.0049	83.9931	0.485189	0.57452	1.10628	No	PREDICTED: protein FLX-like 2	Sesamum indicum	NA	NA	NA	NA	NA
TR43046|c0_g1_i1	158.584	222.115	0.486056	0.537392	1.11526	No	PREDICTED: LOW QUALITY PROTEIN: alanine--tRNA ligase	Sesamum indicum	NA	NA	NA	NA	NA
TR44067|c2_g1_i2	848.641	1188.97	0.486484	0.483581	1.12435	No	PREDICTED: protein phosphatase 2C and cyclic nucleotide-binding/kinase domain-containing protein isoform X1	Sesamum indicum	NA	NA	NA	NA	NA
TR37152|c0_g2_i7	147.869	207.183	0.486583	0.540334	1.11605	No	NA	NA	NA	NA	NA	NA	NA
TR28458|c0_g1_i2	49.2898	69.061	0.486583	0.575078	1.10589	No	PREDICTED: probable histone-arginine methyltransferase 1.3	Sesamum indicum	NA	NA	NA	NA	NA
TR39429|c0_g2_i1	49.2898	69.061	0.486583	0.575078	1.10613	No	NA	NA	NA	NA	NA	NA	NA
TR35984|c0_g1_i1	49.2898	69.061	0.486583	0.575078	1.10625	No	PREDICTED: uncharacterized protein LOC105170029	Sesamum indicum	NA	NA	NA	NA	NA
TR41742|c1_g3_i1	274.308	384.502	0.487192	0.506099	1.12178	No	MYC-RP	Perilla frutescens	Lamiaceae	NA	protein dimerization activity[GO:0046983]	NA	NA
TR42186|c0_g1_i1	175.729	246.38	0.487533	0.530728	1.11842	No	hypothetical protein MIMGU_mgv1a003794mg	Mimulus guttatus	NA	sodium ion transport[GO:0006814] ; transmembrane transport[GO:0055085]	transporter activity[GO:0005215]	integral component of membrane[GO:0016021]	NA
TR34009|c1_g3_i1	477.896	670.078	0.487631	0.487952	1.12219	No	hypothetical protein MIMGU_mgv1a011190mg	Mimulus guttatus	NA	cell redox homeostasis[GO:0045454]	NA	cell[GO:0005623]	NA
TR32171|c0_g4_i4	126.439	177.319	0.487904	0.546846	1.11539	No	PREDICTED: uncharacterized protein LOC105167918	Sesamum indicum	NA	NA	NA	NA	NA
TR41398|c0_g1_i1	231.448	324.773	0.488747	0.513449	1.11968	No	PREDICTED: uncharacterized protein LOC105177636	Sesamum indicum	NA	NA	NA	NA	NA
TR42100|c0_g2_i6	77.1492	108.258	0.488747	0.565049	1.11228	No	NA	NA	NA	NA	NA	NA	NA
TR41900|c1_g4_i2	77.1492	108.258	0.488747	0.565049	1.11216	No	PREDICTED: 2-isopropylmalate synthase A-like	Sesamum indicum	NA	NA	NA	NA	NA
TR34098|c0_g3_i2	38.5746	54.1289	0.488747	0.571087	1.10957	No	PREDICTED: PAX3- and PAX7-binding protein 1	Sesamum indicum	NA	NA	NA	NA	NA
TR41619|c1_g2_i3	38.5746	54.1289	0.488747	0.571087	1.10993	No	NA	NA	NA	NA	NA	NA	NA
TR27902|c0_g2_i1	38.5746	54.1289	0.488747	0.571087	1.10981	No	NA	NA	NA	NA	NA	NA	NA
TR4006|c0_g1_i1	38.5746	54.1289	0.488747	0.571087	1.10969	No	hypothetical protein VITISV_021887	Vitis vinifera	NA	NA	NA	NA	NA
TR31495|c1_g1_i3	1047.94	1470.81	0.489052	0.483229	1.12676	No	PREDICTED: late embryogenesis abundant protein Lea5	Sesamum indicum	NA	NA	NA	NA	NA
TR36995|c0_g2_i2	3623.87	5088.11	0.4896	0.523298	1.12049	No	secretory peroxidase	Avicennia marina	NA	cellular oxidant detoxification[GO:0098869] ; response to oxidative stress[GO:0006979] ; hydrogen peroxide catabolic process[GO:0042744] ; oxidation-reduction process[GO:0055114]	metal ion binding[GO:0046872] ; heme binding[GO:0020037] ; peroxidase activity[GO:0004601]	extracellular region[GO:0005576]	map00940:Phenylpropanoid biosynthesis(lactoperoxidase[ec:1.11.1.7])
TR40870|c2_g5_i2	1067.23	1498.81	0.489945	0.482674	1.12719	No	PREDICTED: lycopene beta cyclase, chloroplastic/chromoplastic	Sesamum indicum	NA	NA	NA	NA	NA
TR18163|c0_g1_i1	66.434	93.3257	0.490351	0.568004	1.11164	No	hypothetical protein AMTR_s00186p00045730	Amborella trichopoda	NA	NA	NA	NA	NA
TR23628|c0_g1_i1	66.434	93.3257	0.490351	0.568004	1.1114	No	NA	NA	NA	NA	NA	NA	NA
TR36186|c0_g2_i3	293.596	412.499	0.490562	0.500337	1.1214	No	PREDICTED: ras-related protein RABH1b	Fragaria vesca subsp. vesca	NA	NA	NA	NA	NA
TR25272|c0_g1_i1	565.761	795.135	0.491007	0.481776	1.1273	No	NA	NA	NA	NA	NA	NA	NA
TR41088|c0_g2_i3	338.599	475.961	0.491264	0.494492	1.12225	No	acetoacetyl-CoA thiolase	Picrorhiza kurrooa	NA	metabolic process[GO:0008152]	transferase activity, transferring acyl groups other than amino-acyl groups[GO:0016747]	NA	NA
TR39779|c0_g8_i1	150.012	210.916	0.491587	0.535322	1.1162	No	hypothetical protein MIMGU_mgv1a0125392mg, partial	Mimulus guttatus	NA	NA	NA	NA	NA
TR39658|c0_g1_i1	177.872	250.113	0.491741	0.526376	1.11969	No	PREDICTED: radical S-adenosyl methionine domain-containing protein 1, mitochondrial	Sesamum indicum	NA	NA	NA	NA	NA
TR36389|c0_g1_i3	278.594	391.968	0.492569	0.500636	1.12146	No	PREDICTED: probable serine/threonine-protein kinase DDB_G0291350	Sesamum indicum	NA	NA	NA	NA	NA
TR40691|c0_g3_i1	139.297	195.984	0.492569	0.538133	1.11533	No	NA	NA	NA	NA	NA	NA	NA
TR31824|c0_g1_i4	27.8594	39.1968	0.492569	0.552974	1.11502	No	PREDICTED: auxin-induced in root cultures protein 12-like	Sesamum indicum	NA	NA	NA	NA	NA
TR35265|c2_g7_i13	27.8594	39.1968	0.492569	0.552974	1.11603	No	PREDICTED: ATP-dependent RNA helicase FAL1 isoform X3	Sesamum indicum	NA	NA	NA	NA	NA
TR3986|c0_g3_i12	27.8594	39.1968	0.492569	0.552974	1.11599	No	hypothetical protein MIMGU_mgv1a0091942mg, partial	Mimulus guttatus	NA	metabolic process[GO:0008152]	NA	NA	NA
TR43273|c0_g10_i1	27.8594	39.1968	0.492569	0.552974	1.11557	No	PREDICTED: NPL4-like protein 2	Sesamum indicum	NA	NA	NA	NA	NA
TR30842|c0_g5_i4	27.8594	39.1968	0.492569	0.552974	1.11565	No	PREDICTED: uncharacterized protein LOC105164037	Sesamum indicum	NA	NA	NA	NA	NA
TR39376|c0_g5_i11	27.8594	39.1968	0.492569	0.552974	1.11519	No	NA	NA	NA	NA	NA	NA	NA
TR43972|c1_g10_i1	27.8594	39.1968	0.492569	0.552974	1.11549	No	NA	NA	NA	NA	NA	NA	NA
TR3073|c1_g2_i1	27.8594	39.1968	0.492569	0.552974	1.11536	No	PREDICTED: uncharacterized protein At5g39865-like	Sesamum indicum	NA	NA	NA	NA	NA
TR37162|c0_g6_i1	83.5783	117.59	0.492569	0.559396	1.11397	No	NA	NA	NA	NA	NA	NA	NA
TR42007|c0_g1_i4	55.7189	78.3935	0.492569	0.569583	1.11173	No	PREDICTED: coatomer subunit beta'-1 isoform X2	Sesamum indicum	NA	NA	NA	NA	NA
TR40791|c0_g5_i1	55.7189	78.3935	0.492569	0.569583	1.11185	No	PREDICTED: beta-D-glucosyl crocetin beta-1,6-glucosyltransferase-like	Sesamum indicum	NA	NA	NA	NA	NA
TR8269|c0_g2_i8	55.7189	78.3935	0.492569	0.569583	1.11181	No	PREDICTED: uncharacterized mitochondrial carrier YMR166C isoform X2	Erythranthe guttatus	NA	NA	NA	NA	NA
TR36232|c0_g7_i3	184.301	259.445	0.493368	0.522909	1.12032	No	PREDICTED: uncharacterized protein LOC105173891	Sesamum indicum	NA	NA	NA	NA	NA
TR30788|c3_g1_i1	128.582	181.052	0.493713	0.541087	1.11606	No	JHL20J20.4	Jatropha curcas	NA	ubiquitin-dependent protein catabolic process[GO:0006511]	NA	NA	NA
TR32239|c0_g2_i3	128.582	181.052	0.493713	0.541087	1.11601	No	hypothetical protein JCGZ_17893	Jatropha curcas	NA	NA	NA	NA	NA
TR33175|c0_g1_i2	302.168	425.565	0.49403	0.496144	1.12243	No	PREDICTED: peptidyl-prolyl cis-trans isomerase FKBP16-4, chloroplastic	Populus euphratica	NA	NA	NA	NA	NA
TR42745|c0_g5_i4	100.723	141.855	0.49403	0.551809	1.11578	No	PREDICTED: uncharacterized protein LOC105165458	Sesamum indicum	NA	NA	NA	NA	NA
TR42073|c0_g2_i5	347.171	489.026	0.494264	0.49096	1.12098	No	PREDICTED: aminoacylase-1 isoform X1	Sesamum indicum	NA	NA	NA	NA	NA
TR40690|c0_g4_i3	218.589	307.975	0.494588	0.511615	1.11877	No	PREDICTED: cleavage and polyadenylation specificity factor subunit 3-II isoform X1	Sesamum indicum	NA	NA	NA	NA	NA
TR41214|c0_g1_i1	72.8631	102.658	0.494588	0.561945	1.11354	No	Casein kinase, putative isoform 1	Theobroma cacao	NA	protein phosphorylation[GO:0006468]	ATP binding[GO:0005524] ; protein serine/threonine kinase activity[GO:0004674]	NA	NA
TR33920|c0_g1_i1	72.8631	102.658	0.494588	0.561945	1.11358	No	PREDICTED: uncharacterized protein At4g06744-like	Sesamum indicum	NA	NA	NA	NA	NA
TR35201|c0_g2_i1	572.19	806.334	0.494883	0.478135	1.12666	No	PREDICTED: uncharacterized protein LOC105174924 isoform X1	Sesamum indicum	NA	NA	NA	NA	NA
TR40150|c0_g1_i1	8792.87	12393.6	0.495195	0.570368	1.11127	No	PREDICTED: ATP-dependent zinc metalloprotease FTSH, chloroplastic-like	Sesamum indicum	NA	NA	NA	NA	NA
TR41602|c0_g1_i6	477.896	673.811	0.495646	0.480755	1.12802	No	PREDICTED: probable lysine--tRNA ligase, cytoplasmic	Sesamum indicum	NA	NA	NA	NA	NA
TR2930|c0_g1_i3	45.0037	63.4614	0.495837	0.567051	1.11238	No	PREDICTED: auxin-responsive protein IAA14	Sesamum indicum	NA	NA	NA	NA	NA
TR41192|c0_g4_i1	45.0037	63.4614	0.495837	0.567051	1.11254	No	PREDICTED: dnaJ homolog subfamily C member 2-like	Sesamum indicum	NA	NA	NA	NA	NA
TR33378|c0_g4_i3	45.0037	63.4614	0.495837	0.567051	1.11262	No	PREDICTED: uncharacterized protein LOC105171751	Sesamum indicum	NA	NA	NA	NA	NA
TR42250|c0_g1_i1	45.0037	63.4614	0.495837	0.567051	1.11246	No	NA	NA	NA	NA	NA	NA	NA
TR42575|c0_g1_i3	45.0037	63.4614	0.495837	0.567051	1.11258	No	NA	NA	NA	NA	NA	NA	NA
TR37714|c0_g1_i3	197.159	278.11	0.496298	0.51633	1.11921	No	PREDICTED: selenium-binding protein 1-like	Solanum tuberosum	NA	NA	selenium binding[GO:0008430]	NA	NA
TR7844|c1_g2_i2	152.155	214.649	0.496434	0.530467	1.11866	No	hypothetical protein MIMGU_mgv1a008775mg	Mimulus guttatus	NA	NA	NA	NA	NA
TR37221|c0_g1_i3	107.152	151.188	0.496685	0.54702	1.11549	No	PREDICTED: glucose-6-phosphate isomerase, cytosolic	Sesamum indicum	NA	NA	NA	NA	NA
TR8143|c4_g1_i1	276.451	390.101	0.496823	0.497186	1.12166	No	PREDICTED: transcription factor JUNGBRUNNEN 1	Sesamum indicum	NA	NA	NA	NA	NA
TR41853|c1_g6_i1	621.48	877.261	0.497299	0.474934	1.12441	No	PREDICTED: RNA polymerase sigma factor sigF, chloroplastic isoform X1	Sesamum indicum	NA	NA	NA	NA	NA
TR2813|c0_g2_i1	62.148	87.7261	0.497299	0.563868	1.11384	No	PREDICTED: neutral ceramidase isoform X1	Sesamum indicum	NA	NA	NA	NA	NA
TR38915|c3_g1_i1	62.148	87.7261	0.497299	0.563868	1.1138	No	PREDICTED: glucomannan 4-beta-mannosyltransferase 2-like	Sesamum indicum	NA	NA	NA	NA	NA
TR29193|c1_g2_i1	62.148	87.7261	0.497299	0.563868	1.11376	No	hypothetical protein MIMGU_mgv1a000759mg	Mimulus guttatus	NA	cation transmembrane transport[GO:0098655] ; metabolic process[GO:0008152] ; metal ion transport[GO:0030001]	copper ion binding[GO:0005507] ; nucleotide binding[GO:0000166] ; cation-transporting ATPase activity[GO:0019829]	integral component of membrane[GO:0016021]	NA
TR40487|c0_g1_i1	1446.55	2041.97	0.497345	0.481655	1.12712	No	PREDICTED: proline--tRNA ligase	Sesamum indicum	NA	NA	NA	NA	NA
TR37597|c0_g1_i7	158.584	223.982	0.498128	0.526991	1.12038	No	NA	NA	NA	NA	NA	NA	NA
TR44146|c0_g9_i1	79.2922	111.991	0.498128	0.55644	1.11384	No	PREDICTED: uncharacterized protein LOC105164037	Sesamum indicum	NA	NA	NA	NA	NA
TR2526|c0_g2_i1	272.165	384.502	0.498507	0.496379	1.12144	No	hypothetical protein MIMGU_mgv1a015215mg	Mimulus guttatus	NA	iron-sulfur cluster assembly[GO:0016226]	iron ion binding[GO:0005506] ; 2 iron, 2 sulfur cluster binding[GO:0051537]	mitochondrial matrix[GO:0005759]	NA
TR40186|c0_g4_i3	192.873	272.511	0.498663	0.515587	1.11892	No	hypothetical protein MIMGU_mgv1a004114mg	Mimulus guttatus	NA	NA	NA	NA	NA
TR43697|c1_g4_i1	96.4365	136.255	0.498663	0.549625	1.11613	No	hypothetical protein MIMGU_mgv1a000480mg	Mimulus guttatus	NA	protein targeting to peroxisome[GO:0006625] ; metabolic process[GO:0008152]	ATPase activity, coupled[GO:0042623] ; ATP binding[GO:0005524]	peroxisomal membrane[GO:0005778]	NA
TR32070|c0_g1_i9	698.629	987.385	0.499087	0.472412	1.12515	No	jasmonate ZIM-domain protein 1	Salvia miltiorrhiza	NA	NA	NA	NA	NA
TR30351|c0_g2_i1	505.756	714.874	0.499249	0.476354	1.12588	No	PREDICTED: elongation factor 1-alpha-like	Gossypium raimondii	NA	NA	NA	NA	NA
TR2261|c0_g3_i3	147.869	209.049	0.499522	0.529237	1.12088	No	PREDICTED: 60S ribosomal protein L26-1-like	Nicotiana tomentosiformis	NA	NA	NA	NA	NA
TR36144|c0_g1_i1	312.883	442.364	0.49961	0.489883	1.12028	No	beta-1,3-glucanase	Camellia sinensis	NA	metabolic process[GO:0008152]	hydrolase activity, hydrolyzing O-glycosyl compounds[GO:0004553]	NA	NA
TR44463|c1_g1_i3	387.889	548.755	0.500518	0.481859	1.1273	No	PREDICTED: mannosyl-oligosaccharide 1,2-alpha-mannosidase MNS3	Sesamum indicum	NA	NA	NA	NA	NA
TR33259|c0_g1_i2	154.298	218.382	0.501131	0.525762	1.11959	No	PREDICTED: adipocyte plasma membrane-associated protein-like	Fragaria vesca subsp. vesca	NA	NA	NA	NA	NA
TR3994|c0_g1_i2	120.01	169.853	0.501131	0.538133	1.11542	No	unknown	Populus trichocarpa	NA	NA	NA	integral component of membrane[GO:0016021]	NA
TR24821|c0_g1_i2	102.866	145.588	0.501131	0.545028	1.11457	No	PREDICTED: uncharacterized protein LOC105971347	Erythranthe guttatus	NA	NA	NA	NA	NA
TR33761|c1_g1_i1	51.4328	72.794	0.501131	0.563201	1.1138	No	NA	NA	NA	NA	NA	NA	NA
TR35600|c1_g2_i3	51.4328	72.794	0.501131	0.563201	1.11368	No	NA	NA	NA	NA	NA	NA	NA
TR32295|c0_g3_i2	17.1443	24.2647	0.501131	0.483507	1.12457	No	hypothetical protein MIMGU_mgv1a005178mg	Mimulus guttatus	NA	proteolysis[GO:0006508]	aspartic-type endopeptidase activity[GO:0004190]	integral component of membrane[GO:0016021]	NA
TR36806|c0_g1_i1	17.1443	24.2647	0.501131	0.483507	1.12462	No	hypothetical protein MIMGU_mgv1a011910mg	Mimulus guttatus	NA	carbohydrate metabolic process[GO:0005975] ; pentose-phosphate shunt[GO:0006098]	6-phosphogluconolactonase activity[GO:0017057]	NA	map00030:Pentose phosphate pathway(phosphogluconolactonase[ec:3.1.1.31]) ; map01130:Biosynthesis of antibiotics(phosphogluconolactonase[ec:3.1.1.31])
TR43889|c1_g4_i2	17.1443	24.2647	0.501131	0.483507	1.12467	No	NA	NA	NA	NA	NA	NA	NA
TR26061|c0_g1_i2	17.1443	24.2647	0.501131	0.483507	1.12511	No	hypothetical protein MIMGU_mgv1a000241mg	Mimulus guttatus	NA	TOR signaling[GO:0031929]	NA	TORC1 complex[GO:0031931]	NA
TR29694|c0_g2_i4	17.1443	24.2647	0.501131	0.483507	1.12526	No	NA	NA	NA	NA	NA	NA	NA
TR31248|c0_g1_i3	17.1443	24.2647	0.501131	0.483507	1.1253	No	NA	NA	NA	NA	NA	NA	NA
TR36181|c0_g4_i1	17.1443	24.2647	0.501131	0.483507	1.12447	No	hypothetical protein MIMGU_mgv1a007652mg	Mimulus guttatus	NA	protein N-linked glycosylation[GO:0006487]	beta-1,4-mannosylglycoprotein 4-beta-N-acetylglucosaminyltransferase activity[GO:0003830]	integral component of membrane[GO:0016021]	map00510:N-Glycan biosynthesis(4-beta-N-acetylglucosaminyltransferase[ec:2.4.1.144])
TR41662|c1_g1_i1	17.1443	24.2647	0.501131	0.483507	1.12697	No	PREDICTED: DDB1- and CUL4-associated factor 8 isoform X1	Sesamum indicum	NA	NA	NA	NA	NA
TR43110|c0_g4_i1	17.1443	24.2647	0.501131	0.483507	1.12423	No	NA	NA	NA	NA	NA	NA	NA
TR23790|c0_g1_i1	17.1443	24.2647	0.501131	0.483507	1.12442	No	NA	NA	NA	NA	NA	NA	NA
TR32189|c0_g4_i4	17.1443	24.2647	0.501131	0.483507	1.12428	No	hypothetical protein MIMGU_mgv1a015640mg	Mimulus guttatus	NA	regulation of transcription, DNA-templated[GO:0006355]	NA	H4/H2A histone acetyltransferase complex[GO:0043189]	NA
TR35614|c2_g9_i1	17.1443	24.2647	0.501131	0.483507	1.12599	No	NA	NA	NA	NA	NA	NA	NA
TR39295|c0_g2_i1	17.1443	24.2647	0.501131	0.483507	1.1254	No	PREDICTED: la-related protein 1C-like	Cucumis melo	NA	NA	NA	NA	NA
TR44158|c1_g4_i4	17.1443	24.2647	0.501131	0.483507	1.12477	No	PREDICTED: probable receptor-like serine/threonine-protein kinase At5g57670	Sesamum indicum	NA	NA	NA	NA	NA
TR43877|c0_g4_i1	171.443	242.647	0.501131	0.520307	1.12225	No	PREDICTED: pentatricopeptide repeat-containing protein At2g15820 isoform X1	Sesamum indicum	NA	NA	NA	NA	NA
TR44424|c0_g6_i1	85.7213	121.323	0.501131	0.551534	1.11616	No	PREDICTED: FIP1[V]-like protein isoform X2	Sesamum indicum	NA	NA	NA	NA	NA
TR37185|c0_g1_i4	34.2885	48.5293	0.501131	0.557712	1.11347	No	NA	NA	NA	NA	NA	NA	NA
TR29145|c0_g1_i2	34.2885	48.5293	0.501131	0.557712	1.1138	No	PREDICTED: uncharacterized protein LOC105172756	Sesamum indicum	NA	NA	NA	NA	NA
TR38747|c0_g7_i3	34.2885	48.5293	0.501131	0.557712	1.11384	No	hypothetical protein MIMGU_mgv1a007527mg	Mimulus guttatus	NA	NA	NA	NA	NA
TR8058|c0_g1_i3	34.2885	48.5293	0.501131	0.557712	1.11372	No	hypothetical protein MIMGU_mgv1a006909mg	Mimulus guttatus	NA	NA	NA	integral component of membrane[GO:0016021]	NA
TR42137|c0_g5_i1	34.2885	48.5293	0.501131	0.557712	1.11339	No	PREDICTED: serine/threonine-protein kinase At5g01020	Sesamum indicum	NA	NA	NA	NA	NA
TR36623|c0_g3_i1	68.5771	97.0587	0.501131	0.5583	1.11381	No	PREDICTED: biotin carboxyl carrier protein of acetyl-CoA carboxylase	Vitis vinifera	NA	NA	NA	NA	NA
TR33402|c1_g1_i4	1020.08	1444.68	0.502063	0.471423	1.1256	No	PREDICTED: uncharacterized protein LOC105159568	Sesamum indicum	NA	NA	NA	NA	NA
TR34533|c0_g2_i1	160.728	227.715	0.50261	0.522478	1.11998	No	PREDICTED: prosaposin-like isoform X2	Sesamum indicum	NA	NA	NA	NA	NA
TR44781|c2_g9_i1	218.589	309.841	0.503305	0.503947	1.121	No	PREDICTED: L-arabinokinase-like	Sesamum indicum	NA	NA	NA	NA	NA
TR31336|c0_g1_i3	92.1504	130.656	0.503709	0.547084	1.11545	No	PREDICTED: transportin-1-like	Sesamum indicum	NA	NA	NA	NA	NA
TR39633|c3_g2_i1	518.614	735.406	0.50388	0.471754	1.12544	No	PREDICTED: peroxisomal (S)-2-hydroxy-acid oxidase GLO1-like	Brassica rapa	NA	NA	NA	NA	NA
TR25193|c0_g1_i3	75.0062	106.391	0.504298	0.553087	1.11496	No	hypothetical protein PRUPE_ppa017278mg	Prunus persica	NA	NA	NA	integral component of membrane[GO:0016021]	NA
TR38007|c0_g5_i4	75.0062	106.391	0.504298	0.553087	1.11492	No	NA	NA	NA	NA	NA	NA	NA
TR32247|c0_g2_i3	1665.14	2363.01	0.504982	0.478644	1.12711	No	hypothetical protein MIMGU_mgv1a015025mg	Mimulus guttatus	NA	photosynthesis[GO:0015979] ; lipoate biosynthetic process[GO:0009107]	lipoate synthase activity[GO:0016992] ; 4 iron, 4 sulfur cluster binding[GO:0051539]	NA	map00785:Lipoic acid metabolism(synthase[ec:2.8.1.8])
TR39527|c3_g1_i3	115.724	164.253	0.505235	0.536399	1.11649	No	PREDICTED: phosphate transporter PHO1 homolog 9-like	Sesamum indicum	NA	NA	NA	NA	NA
TR38527|c3_g2_i4	57.8619	82.1266	0.505235	0.558734	1.11389	No	NA	NA	NA	NA	NA	NA	NA
TR30999|c0_g5_i5	57.8619	82.1266	0.505235	0.558734	1.11402	No	PREDICTED: uncharacterized protein LOC105173594	Sesamum indicum	NA	NA	NA	NA	NA
TR37149|c1_g3_i4	278.594	395.701	0.506244	0.488545	1.12124	No	PREDICTED: probable GTP diphosphokinase RSH2, chloroplastic isoform X2	Sesamum indicum	NA	NA	NA	NA	NA
TR34172|c0_g1_i1	604.335	858.596	0.50663	0.466971	1.1284	No	PREDICTED: NEDD8-activating enzyme E1 catalytic subunit	Sesamum indicum	NA	NA	NA	NA	NA
TR43363|c1_g1_i2	122.153	173.586	0.50696	0.532385	1.11699	No	PREDICTED: glutamate receptor 3.3	Sesamum indicum	NA	NA	NA	NA	NA
TR34459|c0_g2_i1	40.7176	57.8619	0.50696	0.557009	1.11381	No	unnamed protein product	Coffea canephora	NA	NA	NA	NA	NA
TR40716|c0_g5_i1	40.7176	57.8619	0.50696	0.557009	1.11385	No	pectin lyase-like superfamily protein, partial	Artemisia annua	NA	carbohydrate metabolic process[GO:0005975] ; cell wall organization[GO:0071555]	polygalacturonase activity[GO:0004650] ; lyase activity[GO:0016829]	extracellular region[GO:0005576]	map00500:Starch and sucrose metabolism(pectin depolymerase[ec:3.2.1.15]) ; map00040:Pentose and glucuronate interconversions(pectin depolymerase[ec:3.2.1.15])
TR38753|c0_g1_i1	40.7176	57.8619	0.50696	0.557009	1.11369	No	PREDICTED: uncharacterized protein LOC105974493 isoform X1	Erythranthe guttatus	NA	NA	NA	NA	NA
TR42112|c0_g1_i1	40.7176	57.8619	0.50696	0.557009	1.11331	No	PREDICTED: zinc finger CCCH domain-containing protein 13 isoform X4	Sesamum indicum	NA	NA	NA	NA	NA
TR36695|c0_g1_i2	1240.82	1763.85	0.507442	0.469729	1.12804	No	PREDICTED: uncharacterized protein LOC105176253 isoform X1	Sesamum indicum	NA	NA	NA	NA	NA
TR39235|c0_g1_i1	443.608	630.881	0.508084	0.471459	1.12558	No	PREDICTED: lipoyl synthase 2, mitochondrial	Sesamum indicum	NA	NA	NA	NA	NA
TR31890|c0_g2_i1	64.291	91.4591	0.50851	0.553947	1.11505	No	hypothetical protein MIMGU_mgv11b010555mg	Mimulus guttatus	NA	NA	NA	NA	NA
TR36518|c2_g3_i4	152.155	216.516	0.508925	0.519817	1.12223	No	NA	NA	NA	NA	NA	NA	NA
TR40449|c0_g1_i5	87.8644	125.056	0.509228	0.544118	1.11552	No	PREDICTED: ALA-interacting subunit 1-like	Sesamum indicum	NA	NA	NA	NA	NA
TR33374|c1_g1_i1	87.8644	125.056	0.509228	0.544118	1.11578	No	PREDICTED: protein TIFY 6B	Sesamum indicum	NA	NA	NA	NA	NA
TR36313|c1_g1_i2	820.782	1168.44	0.509509	0.46307	1.12947	No	PREDICTED: IAA-amino acid hydrolase ILR1-like 4	Sesamum indicum	NA	NA	NA	NA	NA
TR30643|c1_g4_i2	111.438	158.654	0.509642	0.534458	1.11614	No	hypothetical protein Csa_2G437080	Cucumis sativus	NA	NA	NA	NA	NA
TR36918|c0_g1_i5	135.011	192.251	0.509912	0.524966	1.11998	No	PREDICTED: uncharacterized protein LOC105170638 isoform X2	Sesamum indicum	NA	NA	NA	NA	NA
TR36381|c0_g1_i2	745.776	1062.05	0.510033	0.462532	1.12867	No	hypothetical protein MIMGU_mgv1a007349mg	Mimulus guttatus	NA	oxidation-reduction process[GO:0055114]	flavin adenine dinucleotide binding[GO:0050660] ; acyl-CoA dehydrogenase activity[GO:0003995]	NA	NA
TR42656|c0_g2_i2	252.878	360.237	0.510505	0.48938	1.12162	No	nitric oxide-associated protein	Elaeis guineensis	NA	NA	GTP binding[GO:0005525]	NA	NA
TR36123|c0_g2_i1	306.454	436.764	0.511185	0.480464	1.12783	No	PREDICTED: uncharacterized protein DDB_G0290685	Sesamum indicum	NA	NA	NA	NA	NA
TR34739|c0_g1_i1	23.5734	33.5972	0.511185	0.520385	1.12138	No	hypothetical protein M569_07320, partial	Genlisea aurea	NA	protein phosphorylation[GO:0006468]	protein kinase activity[GO:0004672] ; ATP binding[GO:0005524]	NA	NA
TR38437|c0_g9_i1	23.5734	33.5972	0.511185	0.520385	1.12142	No	NA	NA	NA	NA	NA	NA	NA
TR40442|c1_g3_i1	23.5734	33.5972	0.511185	0.520385	1.12047	No	hypothetical protein MIMGU_mgv1a023655mg	Mimulus guttatus	NA	oxylipin biosynthetic process[GO:0031408] ; oxidation-reduction process[GO:0055114]	metal ion binding[GO:0046872] ; oxidoreductase activity, acting on single donors with incorporation of molecular oxygen, incorporation of two atoms of oxygen[GO:0016702]	NA	NA
TR43652|c0_g10_i1	23.5734	33.5972	0.511185	0.520385	1.12178	No	PREDICTED: uncharacterized protein LOC104218381	Nicotiana sylvestris	NA	NA	NA	NA	NA
TR8201|c0_g3_i1	23.5734	33.5972	0.511185	0.520385	1.1212	No	NA	NA	NA	NA	NA	NA	NA
TR33605|c8_g3_i1	23.5734	33.5972	0.511185	0.520385	1.12111	No	NA	NA	NA	NA	NA	NA	NA
TR38625|c0_g1_i1	23.5734	33.5972	0.511185	0.520385	1.12061	No	hypothetical protein MIMGU_mgv1a009556mg	Mimulus guttatus	NA	NA	NA	NA	NA
TR42001|c0_g3_i1	23.5734	33.5972	0.511185	0.520385	1.1207	No	PREDICTED: uncharacterized protein LOC105166961	Sesamum indicum	NA	NA	NA	NA	NA
TR30811|c3_g5_i1	23.5734	33.5972	0.511185	0.520385	1.12187	No	NA	NA	NA	NA	NA	NA	NA
TR26665|c0_g1_i2	141.44	201.583	0.511185	0.521558	1.11994	No	hypothetical protein JCGZ_14283	Jatropha curcas	NA	NA	NA	NA	NA
TR33470|c0_g2_i3	94.2935	134.389	0.511185	0.540104	1.11614	No	NA	NA	NA	NA	NA	NA	NA
TR37291|c0_g4_i4	94.2935	134.389	0.511185	0.540104	1.11618	No	NA	NA	NA	NA	NA	NA	NA
TR42673|c1_g2_i1	70.7201	100.792	0.511185	0.549218	1.11611	No	PREDICTED: probable folate-biopterin transporter 2	Sesamum indicum	NA	NA	NA	NA	NA
TR40825|c2_g6_i1	70.7201	100.792	0.511185	0.549218	1.11615	No	PREDICTED: LL-diaminopimelate aminotransferase, chloroplastic-like	Solanum tuberosum	NA	systemic acquired resistance, salicylic acid mediated signaling pathway[GO:0009862] ; ethylene biosynthetic process[GO:0009693] ; lysine biosynthetic process via diaminopimelate[GO:0009089]	copper ion binding[GO:0005507] ; L,L-diaminopimelate aminotransferase activity[GO:0010285] ; pyridoxal phosphate binding[GO:0030170]	chloroplast stroma[GO:0009570]	map01130:Biosynthesis of antibiotics(aminotransferase[ec:2.6.1.83]) ; map00300:Lysine biosynthesis(aminotransferase[ec:2.6.1.83])
TR28815|c0_g1_i2	47.1467	67.1945	0.511185	0.554871	1.11528	No	hypothetical protein MIMGU_mgv1a002952mg	Mimulus guttatus	NA	fatty acid biosynthetic process[GO:0006633] ; oxidation-reduction process[GO:0055114]	oxidoreductase activity[GO:0016491] ; iron ion binding[GO:0005506]	integral component of membrane[GO:0016021]	NA
TR28735|c0_g1_i1	47.1467	67.1945	0.511185	0.554871	1.11541	No	PREDICTED: uncharacterized protein LOC105155864	Sesamum indicum	NA	NA	NA	NA	NA
TR43076|c0_g2_i3	47.1467	67.1945	0.511185	0.554871	1.11532	No	PREDICTED: uncharacterized protein At2g39910	Sesamum indicum	NA	NA	NA	NA	NA
TR7319|c0_g3_i1	1868.73	2663.51	0.511276	0.476761	1.12639	No	NA	NA	NA	NA	NA	NA	NA
TR21261|c0_g1_i1	147.869	210.916	0.512346	0.518346	1.121	No	PREDICTED: clustered mitochondria protein	Erythranthe guttatus	NA	NA	NA	NA	NA
TR36937|c1_g2_i3	177.872	253.846	0.513115	0.507908	1.1224	No	NA	NA	NA	NA	NA	NA	NA
TR38485|c0_g3_i3	231.448	330.373	0.513409	0.491738	1.12179	No	PREDICTED: NAC transcription factor 29-like isoform X3	Sesamum indicum	NA	NA	NA	NA	NA
TR40596|c1_g1_i1	77.1492	110.124	0.513409	0.544767	1.11467	No	PREDICTED: uncharacterized protein LOC105165931 isoform X2	Sesamum indicum	NA	NA	NA	NA	NA
TR38481|c0_g1_i6	207.874	296.776	0.513661	0.497977	1.12188	No	PREDICTED: peptidyl-prolyl cis-trans isomerase FKBP62	Sesamum indicum	NA	NA	NA	NA	NA
TR42245|c1_g9_i4	576.476	823.132	0.513864	0.461218	1.13072	No	PREDICTED: UBP1-associated protein 2A-like	Sesamum indicum	NA	NA	NA	NA	NA
TR38186|c0_g1_i4	107.152	153.054	0.514387	0.532277	1.11703	No	PREDICTED: zinc finger CCCH domain-containing protein ZFN-like	Sesamum indicum	NA	NA	NA	NA	NA
TR40113|c0_g2_i2	53.5758	76.527	0.514387	0.55226	1.11577	No	PREDICTED: probable protein phosphatase 2C 5	Sesamum indicum	NA	NA	NA	NA	NA
TR26269|c0_g1_i2	53.5758	76.527	0.514387	0.55226	1.11606	No	PREDICTED: uncharacterized protein LOC105163170	Sesamum indicum	NA	NA	NA	NA	NA
TR33079|c0_g1_i2	53.5758	76.527	0.514387	0.55226	1.11611	No	PREDICTED: uncharacterized protein LOC105168435	Sesamum indicum	NA	NA	NA	NA	NA
TR32251|c0_g1_i5	137.154	195.984	0.514937	0.519948	1.12215	No	hypothetical protein MIMGU_mgv1a012064mg	Mimulus guttatus	NA	NA	NA	NA	NA
TR33945|c0_g4_i5	1324.39	1892.64	0.51507	0.464438	1.12844	No	hypothetical protein MIMGU_mgv1a012400mg	Mimulus guttatus	NA	NA	NA	integral component of membrane[GO:0016021]	NA
TR32731|c0_g5_i2	167.157	238.914	0.515289	0.509582	1.11903	No	PREDICTED: uncharacterized protein At2g34460, chloroplastic	Sesamum indicum	NA	NA	NA	NA	NA
TR38286|c0_g1_i3	167.157	238.914	0.515289	0.509582	1.11908	No	PREDICTED: F-box/kelch-repeat protein At1g30090-like isoform X2	Sesamum indicum	NA	NA	NA	NA	NA
TR7708|c3_g2_i3	83.5783	119.457	0.515289	0.540716	1.11589	No	NA	NA	NA	NA	NA	NA	NA
TR37171|c3_g6_i4	113.581	162.387	0.515714	0.528535	1.1209	No	PREDICTED: random slug protein 5	Sesamum indicum	NA	NA	NA	NA	NA
TR41926|c0_g4_i1	203.588	291.176	0.516238	0.497031	1.12145	No	NA	NA	NA	NA	NA	NA	NA
TR34509|c0_g1_i4	240.02	343.438	0.516898	0.486626	1.12431	No	hypothetical protein MIMGU_mgv1a019330mg	Mimulus guttatus	NA	oxidation-reduction process[GO:0055114]	heme binding[GO:0020037] ; oxidoreductase activity, acting on paired donors, with incorporation or reduction of molecular oxygen[GO:0016705] ; monooxygenase activity[GO:0004497] ; iron ion binding[GO:0005506]	integral component of membrane[GO:0016021]	NA
TR33641|c0_g5_i2	120.01	171.719	0.516898	0.524936	1.12001	No	NA	NA	NA	NA	NA	NA	NA
TR30960|c1_g2_i1	30.0025	42.9298	0.516898	0.538182	1.11517	No	PREDICTED: mitochondrial pyruvate carrier 2	Sesamum indicum	NA	NA	NA	NA	NA
TR41508|c0_g8_i3	30.0025	42.9298	0.516898	0.538182	1.11474	No	PREDICTED: craniofacial development protein 1	Sesamum indicum	NA	NA	NA	NA	NA
TR2263|c1_g2_i1	30.0025	42.9298	0.516898	0.538182	1.1147	No	PREDICTED: protein phosphatase 2C 37-like	Sesamum indicum	NA	NA	NA	NA	NA
TR34871|c0_g6_i1	30.0025	42.9298	0.516898	0.538182	1.11461	No	NA	NA	NA	NA	NA	NA	NA
TR37955|c0_g1_i1	30.0025	42.9298	0.516898	0.538182	1.11457	No	PREDICTED: cytochrome P450 CYP749A22-like	Pyrus x bretschneideri	NA	NA	NA	NA	NA
TR40450|c0_g9_i1	30.0025	42.9298	0.516898	0.538182	1.11453	No	hypothetical protein CISIN_1g045581mg, partial	Citrus sinensis	NA	nucleotide-sugar transport[GO:0015780] ; nucleotide transmembrane transport[GO:1901679]	nucleotide-sugar transmembrane transporter activity[GO:0005338]	integral component of membrane[GO:0016021]	NA
TR34523|c0_g1_i3	30.0025	42.9298	0.516898	0.538182	1.11483	No	basic helix-loop-helix transcription factor	Salvia miltiorrhiza	NA	NA	protein dimerization activity[GO:0046983]	NA	NA
TR29893|c0_g2_i1	60.0049	85.8596	0.516898	0.548659	1.11603	No	PREDICTED: thioredoxin-like 3-3	Erythranthe guttatus	NA	NA	NA	NA	NA
TR36238|c1_g2_i1	60.0049	85.8596	0.516898	0.548659	1.11594	No	hypothetical protein MIMGU_mgv1a010567mg	Mimulus guttatus	NA	protein transport[GO:0015031]	NA	integral component of membrane[GO:0016021]	NA
TR7583|c3_g3_i3	246.449	352.771	0.517444	0.484695	1.12416	No	PREDICTED: protein TIFY 10A-like isoform X2	Sesamum indicum	NA	NA	NA	NA	NA
TR40916|c0_g2_i8	156.441	223.982	0.517757	0.510968	1.11877	No	PREDICTED: probable receptor-like protein kinase At5g47070 isoform X1	Sesamum indicum	NA	NA	NA	NA	NA
TR34007|c0_g5_i5	192.873	276.244	0.518291	0.498597	1.12012	No	PREDICTED: 5'-methylthioadenosine/S-adenosylhomocysteine nucleosidase 1-like	Sesamum indicum	NA	NA	NA	NA	NA
TR39962|c0_g1_i5	162.871	233.314	0.518548	0.508224	1.12051	No	PREDICTED: uncharacterized protein LOC105177297	Sesamum indicum	NA	NA	NA	NA	NA
TR38597|c0_g2_i1	66.434	95.1922	0.51892	0.54468	1.11471	No	PREDICTED: metal tolerance protein 2	Sesamum indicum	NA	NA	NA	NA	NA
TR26880|c0_g1_i3	66.434	95.1922	0.51892	0.54468	1.11484	No	hypothetical protein MIMGU_mgv1a013220mg	Mimulus guttatus	NA	NA	NA	NA	NA
TR40571|c0_g4_i1	368.602	528.223	0.519085	0.467098	1.12815	No	PREDICTED: lysosomal Pro-X carboxypeptidase	Sesamum indicum	NA	NA	NA	NA	NA
TR44356|c0_g2_i1	102.866	147.455	0.519509	0.529816	1.11892	No	hypothetical protein MIMGU_mgv1a026345mg	Mimulus guttatus	NA	NA	NA	NA	NA
TR41203|c2_g1_i6	902.217	1293.49	0.519726	0.454771	1.13322	No	PREDICTED: probable mitochondrial chaperone BCS1-B	Sesamum indicum	NA	NA	NA	NA	NA
TR40948|c3_g1_i3	145.726	209.049	0.520583	0.512145	1.11801	No	unnamed protein product	Coffea canephora	NA	glycolytic process[GO:0006096]	potassium ion binding[GO:0030955] ; pyruvate kinase activity[GO:0004743] ; magnesium ion binding[GO:0000287] ; kinase activity[GO:0016301]	NA	map01130:Biosynthesis of antibiotics(kinase[ec:2.7.1.40]) ; map00620:Pyruvate metabolism(kinase[ec:2.7.1.40]) ; map00010:Glycolysis / Gluconeogenesis(kinase[ec:2.7.1.40]) ; map00230:Purine metabolism(kinase[ec:2.7.1.40])
TR34078|c1_g1_i2	72.8631	104.525	0.520583	0.540702	1.11634	No	PREDICTED: bet1-like SNARE 1-2 isoform X1	Sesamum indicum	NA	NA	NA	NA	NA
TR18894|c0_g1_i1	36.4316	52.2624	0.520583	0.543762	1.1165	No	PREDICTED: uncharacterized protein LOC105157258	Sesamum indicum	NA	NA	NA	NA	NA
TR36911|c0_g4_i2	36.4316	52.2624	0.520583	0.543762	1.11646	No	NA	NA	NA	NA	NA	NA	NA
TR42036|c0_g2_i1	36.4316	52.2624	0.520583	0.543762	1.11611	No	PREDICTED: LOW QUALITY PROTEIN: uncharacterized protein LOC105164705	Sesamum indicum	NA	NA	NA	NA	NA
TR44677|c0_g2_i1	36.4316	52.2624	0.520583	0.543762	1.11663	No	PREDICTED: chloroplastic group IIA intron splicing facilitator CRS1, chloroplastic-like isoform X2	Solanum tuberosum	NA	NA	NA	NA	NA
TR28823|c1_g1_i5	36.4316	52.2624	0.520583	0.543762	1.11633	No	NA	NA	NA	NA	NA	NA	NA
TR44101|c1_g1_i1	36.4316	52.2624	0.520583	0.543762	1.11624	No	PREDICTED: uncharacterized protein LOC105953101 isoform X2	Erythranthe guttatus	NA	NA	NA	NA	NA
TR34505|c0_g1_i1	297.882	427.431	0.520954	0.47304	1.12559	No	NA	NA	NA	NA	NA	NA	NA
TR37609|c0_g1_i2	152.155	218.382	0.521309	0.509362	1.12135	No	unnamed protein product	Coffea canephora	NA	nucleocytoplasmic transport[GO:0006913] ; intracellular protein transport[GO:0006886] ; metabolic process[GO:0008152] ; small GTPase mediated signal transduction[GO:0007264]	GTP binding[GO:0005525] ; GTPase activity[GO:0003924]	intracellular[GO:0005622] ; membrane[GO:0016020]	NA
TR41438|c0_g2_i1	158.584	227.715	0.521975	0.506726	1.12196	No	PREDICTED: probable ubiquitin-like-specific protease 2B isoform X2	Sesamum indicum	NA	NA	NA	NA	NA
TR39232|c1_g3_i1	79.2922	113.857	0.521975	0.536943	1.11693	No	PREDICTED: probable amino-acid acetyltransferase NAGS1, chloroplastic	Sesamum indicum	NA	NA	NA	NA	NA
TR43171|c0_g3_i1	6114.07	8783.81	0.522713	0.525394	1.11934	No	PREDICTED: presequence protease 1, chloroplastic/mitochondrial-like	Sesamum indicum	NA	NA	NA	NA	NA
TR41342|c0_g4_i7	85.7213	123.19	0.523157	0.533528	1.11576	No	PREDICTED: LOW QUALITY PROTEIN: probable serine/threonine-protein kinase At1g18390	Erythranthe guttatus	NA	NA	NA	NA	NA
TR33194|c1_g3_i12	85.7213	123.19	0.523157	0.533528	1.11585	No	PREDICTED: formin-like protein CG32138	Sesamum indicum	NA	NA	NA	NA	NA
TR2965|c0_g3_i1	42.8607	61.5949	0.523157	0.544532	1.11547	No	PREDICTED: beta-xylosidase/alpha-L-arabinofuranosidase 2-like	Sesamum indicum	NA	NA	NA	NA	NA
TR44183|c1_g1_i1	42.8607	61.5949	0.523157	0.544532	1.11517	No	PREDICTED: lipoxygenase 6, chloroplastic	Sesamum indicum	NA	NA	NA	NA	NA
TR39993|c0_g2_i2	42.8607	61.5949	0.523157	0.544532	1.11509	No	PREDICTED: uncharacterized protein LOC105967625, partial	Erythranthe guttatus	NA	NA	NA	NA	NA
TR43692|c1_g5_i6	42.8607	61.5949	0.523157	0.544532	1.11526	No	PREDICTED: zinc finger BED domain-containing protein RICESLEEPER 1-like	Brassica napus	NA	NA	NA	NA	NA
TR41051|c0_g3_i4	606.478	871.662	0.523312	0.452331	1.13268	No	PREDICTED: transmembrane E3 ubiquitin-protein ligase 1	Sesamum indicum	NA	NA	NA	NA	NA
TR36068|c1_g3_i5	276.451	397.567	0.524174	0.473254	1.12535	No	hypothetical protein MIMGU_mgv1a010781mg	Mimulus guttatus	NA	regulation of transcription, DNA-templated[GO:0006355] ; transcription, DNA-templated[GO:0006351]	DNA binding[GO:0003677]	nucleus[GO:0005634]	NA
TR40331|c0_g1_i8	92.1504	132.522	0.524174	0.530312	1.11865	No	PREDICTED: uncharacterized protein LOC105168334	Sesamum indicum	NA	NA	NA	NA	NA
TR8034|c5_g10_i1	141.44	203.45	0.524481	0.510396	1.1188	No	putative Golgi-associated protein	Solanum lycopersicum	NA	cellulose biosynthetic process[GO:0030244]	intramolecular transferase activity[GO:0016866]	NA	NA
TR34514|c0_g1_i1	621.48	894.06	0.524664	0.450892	1.13151	No	PREDICTED: LOW QUALITY PROTEIN: ribose-phosphate pyrophosphokinase 1-like	Erythranthe guttatus	NA	NA	NA	NA	NA
TR32087|c0_g1_i1	98.5795	141.855	0.525057	0.527028	1.12037	No	hypothetical protein MIMGU_mgv1a003460mg	Mimulus guttatus	NA	NA	NA	integral component of membrane[GO:0016021]	NA
TR3506|c3_g3_i3	49.2898	70.9275	0.525057	0.543972	1.11633	No	PREDICTED: protein ELF4-LIKE 3	Pyrus x bretschneideri	NA	NA	NA	NA	NA
TR8045|c1_g2_i1	49.2898	70.9275	0.525057	0.543972	1.11599	No	NA	NA	NA	NA	NA	NA	NA
TR35051|c1_g2_i7	49.2898	70.9275	0.525057	0.543972	1.1159	No	NA	NA	NA	NA	NA	NA	NA
TR43923|c2_g4_i1	49.2898	70.9275	0.525057	0.543972	1.11573	No	PREDICTED: putative disease resistance protein RGA3	Sesamum indicum	NA	NA	NA	NA	NA
TR40963|c1_g1_i1	666.483	959.388	0.525545	0.449522	1.13173	No	PREDICTED: uncharacterized protein LOC105161555	Sesamum indicum	NA	NA	NA	NA	NA
TR38038|c0_g6_i4	210.017	302.375	0.525831	0.486853	1.12372	No	PREDICTED: uncharacterized protein LOC105163785	Sesamum indicum	NA	NA	NA	NA	NA
TR43234|c1_g1_i1	105.009	151.188	0.525831	0.52374	1.11973	No	hypothetical protein MIMGU_mgv1a000428mg	Mimulus guttatus	NA	phosphatidylinositol phosphorylation[GO:0046854] ; phosphatidylinositol-mediated signaling[GO:0048015]	phosphotransferase activity, alcohol group as acceptor[GO:0016773] ; kinase activity[GO:0016301]	intracellular[GO:0005622]	NA
TR8216|c1_g4_i2	160.728	231.448	0.526069	0.502584	1.1224	No	PREDICTED: EH domain-containing protein 1-like	Sesamum indicum	NA	NA	NA	NA	NA
TR32745|c0_g2_i5	167.157	240.78	0.526516	0.500076	1.12133	No	alpha-tubulin 2	Gossypium hirsutum	NA	microtubule-based process[GO:0007017] ; metabolic process[GO:0008152]	structural constituent of cytoskeleton[GO:0005200] ; GTP binding[GO:0005525] ; GTPase activity[GO:0003924]	microtubule[GO:0005874]	NA
TR33466|c0_g1_i1	55.7189	80.2601	0.526516	0.542132	1.11649	No	hypothetical protein M569_12550, partial	Genlisea aurea	NA	translational initiation[GO:0006413]	translation initiation factor binding[GO:0031369] ; translation initiation factor activity[GO:0003743]	eukaryotic translation initiation factor 3 complex[GO:0005852]	NA
TR41983|c1_g4_i2	55.7189	80.2601	0.526516	0.542132	1.11636	No	NA	NA	NA	NA	NA	NA	NA
TR39976|c0_g2_i9	55.7189	80.2601	0.526516	0.542132	1.11666	No	NA	NA	NA	NA	NA	NA	NA
TR39143|c1_g6_i8	3677.45	5299.03	0.527024	0.493715	1.12262	No	AF106570_1alpha-tubulin	Gossypium hirsutum	NA	microtubule-based process[GO:0007017]	structural constituent of cytoskeleton[GO:0005200] ; GTP binding[GO:0005525]	microtubule[GO:0005874]	NA
TR39619|c2_g3_i1	422.178	608.483	0.527368	0.455895	1.1315	No	PREDICTED: E3 ubiquitin-protein ligase At1g63170-like	Sesamum indicum	NA	NA	NA	NA	NA
TR37582|c0_g1_i2	310.74	447.963	0.527673	0.465611	1.1295	No	PREDICTED: 5'-nucleotidase domain-containing protein 4	Sesamum indicum	NA	NA	NA	NA	NA
TR2277|c0_g1_i3	62.148	89.5926	0.527673	0.53927	1.11519	No	PREDICTED: reticulon-like protein B9	Sesamum indicum	NA	NA	NA	NA	NA
TR35465|c0_g5_i3	255.021	367.703	0.527925	0.473822	1.12536	No	PREDICTED: uncharacterized protein LOC105155665 isoform X1	Sesamum indicum	NA	NA	NA	NA	NA
TR32182|c0_g1_i3	274.308	395.701	0.528612	0.469764	1.12802	No	NA	NA	NA	NA	NA	NA	NA
TR41268|c2_g4_i4	68.5771	98.9252	0.528612	0.536007	1.11619	No	PREDICTED: uncharacterized protein LOC105164092	Sesamum indicum	NA	NA	NA	NA	NA
TR32830|c0_g1_i2	68.5771	98.9252	0.528612	0.536007	1.11615	No	hypothetical protein MIMGU_mgv1a006823mg	Mimulus guttatus	NA	NA	NA	NA	NA
TR43123|c0_g7_i2	505.756	729.807	0.529073	0.450192	1.13081	No	PREDICTED: peptidyl-prolyl cis-trans isomerase FKBP62	Sesamum indicum	NA	NA	NA	NA	NA
TR38789|c1_g2_i2	225.019	324.773	0.529389	0.479589	1.12765	No	PREDICTED: isochorismate synthase, chloroplastic-like	Sesamum indicum	NA	NA	NA	NA	NA
TR27424|c1_g1_i5	1212.96	1750.79	0.529477	0.450472	1.13114	No	NA	NA	NA	NA	NA	NA	NA
TR42297|c2_g4_i4	550.76	795.135	0.529776	0.448067	1.13248	No	hypothetical protein EUTSA_v10006511mg	Eutrema salsugineum	NA	NA	NA	NA	NA
TR25514|c0_g1_i2	244.306	352.771	0.530044	0.474284	1.12411	No	NA	NA	NA	NA	NA	NA	NA
TR42229|c1_g2_i1	81.4353	117.59	0.530044	0.529576	1.12093	No	PREDICTED: sulfate transporter 3.1-like	Sesamum indicum	NA	NA	NA	NA	NA
TR42628|c0_g3_i5	169.3	244.513	0.530333	0.496143	1.12247	No	PREDICTED: uncharacterized protein LOC105156965	Sesamum indicum	NA	NA	NA	NA	NA
TR34010|c1_g2_i1	87.8644	126.923	0.530602	0.52673	1.12018	No	unnamed protein product	Coffea canephora	NA	NA	NA	NA	NA
TR38384|c2_g1_i4	94.2935	136.255	0.531084	0.523858	1.11976	No	PREDICTED: nucleolin 1-like	Sesamum indicum	NA	NA	NA	NA	NA
TR3821|c0_g5_i2	201.445	291.176	0.531505	0.484599	1.12447	No	PREDICTED: 14-3-3-like protein 16R	Sesamum indicum	NA	NA	NA	NA	NA
TR41761|c0_g1_i3	100.723	145.588	0.531505	0.520891	1.11972	No	PREDICTED: uncharacterized protein LOC105968455	Erythranthe guttatus	NA	NA	NA	NA	NA
TR44273|c0_g1_i2	214.303	309.841	0.531874	0.480432	1.1278	No	PREDICTED: LOW QUALITY PROTEIN: uncharacterized protein LOC105949058	Erythranthe guttatus	NA	NA	NA	NA	NA
TR37936|c0_g3_i3	340.742	492.759	0.532202	0.458369	1.13103	No	PREDICTED: E3 ubiquitin-protein ligase SINAT5	Sesamum indicum	NA	NA	NA	NA	NA
TR41258|c0_g4_i2	240.02	347.171	0.532495	0.473166	1.12565	No	PREDICTED: serine/threonine-protein kinase At5g01020	Sesamum indicum	NA	NA	NA	NA	NA
TR36826|c1_g3_i3	499.327	722.341	0.532695	0.447326	1.132	No	PREDICTED: probable sodium/metabolite cotransporter BASS2, chloroplastic isoform X1	Sesamum indicum	NA	NA	NA	NA	NA
TR8125|c1_g7_i1	139.297	201.583	0.533211	0.503914	1.1213	No	PREDICTED: probable E3 ubiquitin-protein ligase ARI8	Sesamum indicum	NA	NA	NA	NA	NA
TR38451|c0_g1_i3	4961.12	7180.48	0.533413	0.504829	1.12068	No	PREDICTED: glucose-1-phosphate adenylyltransferase large subunit 3, chloroplastic/amyloplastic	Sesamum indicum	NA	NA	NA	NA	NA
TR7880|c1_g1_i1	158.584	229.581	0.533752	0.496858	1.1212	No	hypothetical protein MIMGU_mgv1a007289mg	Mimulus guttatus	NA	metabolic process[GO:0008152]	amino acid binding[GO:0016597]	NA	NA
TR34275|c0_g1_i4	19868.1	28768.6	0.534042	0.607074	1.09422	No	PREDICTED: ferredoxin--NADP reductase, leaf isozyme, chloroplastic-like	Oryza brachyantha	NA	stomatal complex morphogenesis[GO:0010103] ; negative regulation of defense response[GO:0031348] ; pentose-phosphate shunt[GO:0006098] ; photorespiration[GO:0009853] ; detection of biotic stimulus[GO:0009595] ; jasmonic acid mediated signaling pathway[GO:0009867] ; salicylic acid biosynthetic process[GO:0009697] ; systemic acquired resistance, salicylic acid mediated signaling pathway[GO:0009862]…	oxidoreductase activity[GO:0016491] ; poly(U) RNA binding[GO:0008266]	apoplast[GO:0048046] ; chloroplast thylakoid[GO:0009534]	NA
TR3516|c1_g1_i2	349.314	505.825	0.534112	0.455875	1.1315	No	PREDICTED: 3-deoxy-manno-octulosonate cytidylyltransferase, mitochondrial	Sesamum indicum	NA	NA	NA	NA	NA
TR32955|c0_g7_i3	1247.25	1806.78	0.534679	0.446618	1.13165	No	PREDICTED: 30S ribosomal protein S10, chloroplastic	Sesamum indicum	NA	NA	NA	NA	NA
TR31813|c2_g1_i1	242.163	350.904	0.535101	0.470438	1.12561	No	hypothetical protein ZEAMMB73_301405	Zea mays	NA	microtubule-based process[GO:0007017] ; metabolic process[GO:0008152]	structural constituent of cytoskeleton[GO:0005200] ; GTP binding[GO:0005525] ; GTPase activity[GO:0003924]	microtubule[GO:0005874]	NA
TR38104|c1_g1_i2	300.025	434.898	0.535594	0.460156	1.13268	No	PREDICTED: uridine kinase-like protein 3 isoform X2	Sesamum indicum	NA	NA	NA	NA	NA
TR13495|c0_g1_i1	19.2873	27.9977	0.537657	0.470033	1.12685	No	PREDICTED: LOW QUALITY PROTEIN: uncharacterized protein LOC105176486	Sesamum indicum	NA	NA	NA	NA	NA
TR24301|c0_g1_i1	19.2873	27.9977	0.537657	0.470033	1.12806	No	PREDICTED: clathrin heavy chain 2-like, partial	Oryza brachyantha	NA	NA	NA	NA	NA
TR28332|c0_g3_i1	19.2873	27.9977	0.537657	0.470033	1.12811	No	NA	NA	NA	NA	NA	NA	NA
TR33352|c0_g1_i2	19.2873	27.9977	0.537657	0.470033	1.12786	No	PREDICTED: cytidine deaminase 1	Sesamum indicum	NA	NA	NA	NA	NA
TR3903|c0_g1_i1	19.2873	27.9977	0.537657	0.470033	1.12776	No	NA	NA	NA	NA	NA	NA	NA
TR43840|c4_g1_i16	19.2873	27.9977	0.537657	0.470033	1.12756	No	hypothetical protein B456_002G225800	Gossypium raimondii	NA	L-arabinose metabolic process[GO:0046373]	alpha-L-arabinofuranosidase activity[GO:0046556]	NA	map00520:Amino sugar and nucleotide sugar metabolism(end alpha-L-arabinofuranosidase[ec:3.2.1.55])
TR2570|c0_g1_i8	19.2873	27.9977	0.537657	0.470033	1.12816	No	hypothetical protein MIMGU_mgv1a013398mg	Mimulus guttatus	NA	membrane fusion[GO:0061025] ; vesicle-mediated transport[GO:0016192] ; intracellular protein transport[GO:0006886]	SNAP receptor activity[GO:0005484]	Golgi apparatus[GO:0005794] ; integral component of membrane[GO:0016021]	NA
TR34287|c1_g2_i3	19.2873	27.9977	0.537657	0.470033	1.12544	No	hypothetical protein MIMGU_mgv1a007460mg	Mimulus guttatus	NA	pectin catabolic process[GO:0045490]	metal ion binding[GO:0046872] ; pectate lyase activity[GO:0030570]	NA	map00040:Pentose and glucuronate interconversions(lyase[ec:4.2.2.2])
TR39857|c0_g1_i2	19.2873	27.9977	0.537657	0.470033	1.12534	No	PREDICTED: uncharacterized protein LOC105174537 isoform X1	Sesamum indicum	NA	NA	NA	NA	NA
TR43435|c1_g5_i4	19.2873	27.9977	0.537657	0.470033	1.12559	No	hypothetical protein MIMGU_mgv1a001682mg	Mimulus guttatus	NA	proteolysis[GO:0006508]	serine-type endopeptidase activity[GO:0004252]	NA	NA
TR14484|c0_g1_i1	19.2873	27.9977	0.537657	0.470033	1.12741	No	NA	NA	NA	NA	NA	NA	NA
TR30314|c0_g1_i1	19.2873	27.9977	0.537657	0.470033	1.12796	No	NA	NA	NA	NA	NA	NA	NA
TR34580|c1_g3_i1	19.2873	27.9977	0.537657	0.470033	1.12781	No	PREDICTED: extra-large guanine nucleotide-binding protein 3-like	Sesamum indicum	NA	NA	NA	NA	NA
TR41947|c0_g6_i5	19.2873	27.9977	0.537657	0.470033	1.12771	No	Serine carboxypeptidase-like 48	Morus notabilis	NA	proteolysis[GO:0006508]	serine-type carboxypeptidase activity[GO:0004185]	NA	NA
TR43226|c1_g1_i6	19.2873	27.9977	0.537657	0.470033	1.12766	No	PREDICTED: RING-H2 finger protein ATL13 isoform X2	Sesamum indicum	NA	NA	NA	NA	NA
TR30661|c0_g1_i6	77.1492	111.991	0.537657	0.525182	1.12013	No	PREDICTED: protein NSP-INTERACTING KINASE 3	Nicotiana sylvestris	NA	NA	NA	NA	NA
TR41327|c0_g4_i1	38.5746	55.9954	0.537657	0.53143	1.11805	No	hypothetical protein MIMGU_mgv1a006770mg	Mimulus guttatus	NA	NA	NA	NA	NA
TR2209|c0_g3_i5	38.5746	55.9954	0.537657	0.53143	1.11858	No	PREDICTED: iron-sulfur assembly protein IscA, chloroplastic	Sesamum indicum	NA	NA	NA	NA	NA
TR29995|c0_g3_i1	38.5746	55.9954	0.537657	0.53143	1.11862	No	NA	NA	NA	NA	NA	NA	NA
TR44415|c0_g1_i5	38.5746	55.9954	0.537657	0.53143	1.11849	No	hypothetical protein MIMGU_mgv1a0007212mg, partial	Mimulus guttatus	NA	regulation of transcription, DNA-templated[GO:0006355] ; chromatin modification[GO:0016568] ; transcription, DNA-templated[GO:0006351]	NA	nucleus[GO:0005634]	NA
TR35036|c1_g6_i3	38.5746	55.9954	0.537657	0.53143	1.11845	No	PREDICTED: homeobox protein knotted-1-like LET12 isoform X2	Sesamum indicum	NA	NA	NA	NA	NA
TR32542|c0_g3_i2	45.0037	65.328	0.537657	0.533429	1.11634	No	hypothetical protein MIMGU_mgv1a009660mg	Mimulus guttatus	NA	cellular amino acid metabolic process[GO:0006520]	pyridoxal phosphate binding[GO:0030170]	NA	NA
TR3437|c0_g1_i2	45.0037	65.328	0.537657	0.533429	1.11643	No	NA	NA	NA	NA	NA	NA	NA
TR24347|c0_g1_i4	45.0037	65.328	0.537657	0.533429	1.11647	No	hypothetical protein MIMGU_mgv1a010961mg	Mimulus guttatus	NA	oxidation-reduction process[GO:0055114]	zinc ion binding[GO:0008270] ; oxidoreductase activity[GO:0016491]	NA	NA
TR22180|c0_g1_i1	12.8582	18.6651	0.537657	0.39675	1.13484	No	hypothetical protein MIMGU_mgv1a001759mg	Mimulus guttatus	NA	NA	NA	NA	NA
TR3616|c0_g3_i1	12.8582	18.6651	0.537657	0.39675	1.13508	No	NA	NA	NA	NA	NA	NA	NA
TR20752|c0_g1_i1	12.8582	18.6651	0.537657	0.39675	1.13345	No	PREDICTED: VIN3-like protein 1	Sesamum indicum	NA	NA	NA	NA	NA
TR34925|c0_g2_i5	12.8582	18.6651	0.537657	0.39675	1.13339	No	hypothetical protein MIMGU_mgv1a011315mg	Mimulus guttatus	NA	fatty acid metabolic process[GO:0006631] ; oxidation-reduction process[GO:0055114]	3-hydroxyacyl-CoA dehydrogenase activity[GO:0003857] ; NAD+ binding[GO:0070403]	NA	map00071:Fatty acid degradation(dehydrogenase[ec:1.1.1.35]) ; map00380:Tryptophan metabolism(dehydrogenase[ec:1.1.1.35]) ; map00062:Fatty acid elongation(dehydrogenase[ec:1.1.1.35]) ; map01130:Biosynthesis of antibiotics(dehydrogenase[ec:1.1.1.35]) ; map00310:Lysine degradation(dehydrogenase[ec:1.1.1.35]) ; map00120:Primary bile acid biosynthesis(dehydrogenase[ec:1.1.1.35]) ; map00281:Geraniol de…
TR40313|c0_g1_i1	12.8582	18.6651	0.537657	0.39675	1.13478	No	NA	NA	NA	NA	NA	NA	NA
TR43439|c0_g7_i2	12.8582	18.6651	0.537657	0.39675	1.13315	No	PREDICTED: homeobox-leucine zipper protein MERISTEM L1-like	Sesamum indicum	NA	NA	NA	NA	NA
TR7776|c0_g2_i1	12.8582	18.6651	0.537657	0.39675	1.13309	No	NA	NA	NA	NA	NA	NA	NA
TR17334|c0_g1_i1	12.8582	18.6651	0.537657	0.39675	1.13303	No	PREDICTED: leukocyte receptor cluster member 8 homolog isoform X2	Nelumbo nucifera	NA	NA	NA	NA	NA
TR26811|c0_g1_i1	12.8582	18.6651	0.537657	0.39675	1.13266	No	NA	NA	NA	NA	NA	NA	NA
TR36599|c0_g1_i5	12.8582	18.6651	0.537657	0.39675	1.13333	No	hypothetical protein MIMGU_mgv1a005791mg	Mimulus guttatus	NA	NA	NA	NA	NA
TR44546|c3_g1_i3	12.8582	18.6651	0.537657	0.39675	1.13381	No	PREDICTED: LRR receptor-like serine/threonine-protein kinase RPK2	Sesamum indicum	NA	NA	NA	NA	NA
TR37181|c0_g1_i2	231.448	335.972	0.537657	0.470849	1.12583	No	PREDICTED: lycopene epsilon cyclase, chloroplastic	Sesamum indicum	NA	NA	NA	NA	NA
TR31244|c0_g1_i4	160.728	233.314	0.537657	0.492894	1.12233	No	hypothetical protein MIMGU_mgv1a012427mg	Mimulus guttatus	NA	NA	NA	NA	NA
TR43613|c1_g2_i3	141.44	205.316	0.537657	0.499453	1.12115	No	PREDICTED: acyl-coenzyme A oxidase 3, peroxisomal-like	Sesamum indicum	NA	NA	NA	NA	NA
TR19685|c0_g1_i1	25.7164	37.3303	0.537657	0.508204	1.12139	No	PREDICTED: pentatricopeptide repeat-containing protein At2g18940, chloroplastic	Sesamum indicum	NA	NA	NA	NA	NA
TR35569|c0_g3_i1	25.7164	37.3303	0.537657	0.508204	1.12171	No	PREDICTED: riboflavin synthase	Sesamum indicum	NA	NA	NA	NA	NA
TR39268|c4_g4_i1	25.7164	37.3303	0.537657	0.508204	1.12157	No	PREDICTED: PTI1-like tyrosine-protein kinase 1 isoform X1	Pyrus x bretschneideri	NA	NA	NA	NA	NA
TR43415|c3_g1_i1	25.7164	37.3303	0.537657	0.508204	1.12185	No	PREDICTED: gamma-glutamyltranspeptidase 3	Sesamum indicum	NA	NA	NA	NA	NA
TR33133|c0_g9_i2	25.7164	37.3303	0.537657	0.508204	1.12134	No	NA	NA	NA	NA	NA	NA	NA
TR40809|c0_g8_i1	25.7164	37.3303	0.537657	0.508204	1.12102	No	PREDICTED: uncharacterized protein LOC105164313	Sesamum indicum	NA	NA	NA	NA	NA
TR33094|c0_g1_i3	25.7164	37.3303	0.537657	0.508204	1.12088	No	NA	NA	NA	NA	NA	NA	NA
TR7425|c1_g1_i4	25.7164	37.3303	0.537657	0.508204	1.12056	No	hypothetical protein VITISV_003164	Vitis vinifera	NA	NA	NA	NA	NA
TR3758|c0_g2_i1	109.295	158.654	0.537657	0.512283	1.118	No	PREDICTED: uncharacterized protein LOC105156358	Sesamum indicum	NA	NA	NA	NA	NA
TR35196|c0_g1_i1	96.4365	139.988	0.537657	0.517673	1.12049	No	argininosuccinate synthase	Oryza sativa Indica Group	NA	arginine biosynthetic process[GO:0006526]	ATP binding[GO:0005524] ; argininosuccinate synthase activity[GO:0004055]	NA	map00220:Arginine biosynthesis(synthase[ec:6.3.4.5]) ; map00250:Alanine, aspartate and glutamate metabolism(synthase[ec:6.3.4.5]) ; map01130:Biosynthesis of antibiotics(synthase[ec:6.3.4.5])
TR40329|c1_g3_i6	83.5783	121.323	0.537657	0.522634	1.12005	No	PREDICTED: transcriptional corepressor SEUSS	Sesamum indicum	NA	NA	NA	NA	NA
TR37419|c0_g3_i1	32.1455	46.6628	0.537657	0.525337	1.12006	No	PREDICTED: nudix hydrolase 18, mitochondrial-like	Sesamum indicum	NA	NA	NA	NA	NA
TR24908|c0_g1_i1	32.1455	46.6628	0.537657	0.525337	1.12019	No	PREDICTED: probable pectate lyase 18	Sesamum indicum	NA	NA	NA	NA	NA
TR36328|c1_g2_i2	32.1455	46.6628	0.537657	0.525337	1.11948	No	PREDICTED: protein disulfide isomerase-like 2-3	Sesamum indicum	NA	NA	NA	NA	NA
TR40304|c1_g2_i2	32.1455	46.6628	0.537657	0.525337	1.11988	No	PREDICTED: crocetin glucosyltransferase, chloroplastic-like	Sesamum indicum	NA	NA	NA	NA	NA
TR42943|c0_g1_i3	32.1455	46.6628	0.537657	0.525337	1.11997	No	PREDICTED: zinc phosphodiesterase ELAC protein 2-like	Sesamum indicum	NA	NA	NA	NA	NA
TR40488|c1_g1_i4	70.7201	102.658	0.537657	0.527872	1.12078	No	PREDICTED: truncated FRIGIDA-like protein 1	Sesamum indicum	NA	NA	NA	NA	NA
TR39987|c0_g1_i2	64.291	93.3257	0.537657	0.530498	1.11838	No	PREDICTED: uncharacterized protein LOC105157181	Sesamum indicum	NA	NA	NA	NA	NA
TR32465|c0_g1_i10	64.291	93.3257	0.537657	0.530498	1.11842	No	PREDICTED: UPF0481 protein At3g47200-like	Sesamum indicum	NA	NA	NA	NA	NA
TR3059|c1_g1_i1	57.8619	83.9931	0.537657	0.532717	1.11585	No	PREDICTED: 25.3 kDa vesicle transport protein-like	Sesamum indicum	NA	NA	NA	NA	NA
TR40090|c0_g3_i1	51.4328	74.6605	0.537657	0.533949	1.11547	No	PREDICTED: uncharacterized protein LOC105161516	Sesamum indicum	NA	NA	NA	NA	NA
TR40574|c1_g1_i4	51.4328	74.6605	0.537657	0.533949	1.11542	No	PREDICTED: aspartic proteinase-like protein 2	Sesamum indicum	NA	NA	NA	NA	NA
TR35657|c0_g4_i4	465.038	675.678	0.538986	0.443477	1.13059	No	PREDICTED: uncharacterized protein LOC105159627	Sesamum indicum	NA	NA	NA	NA	NA
TR42285|c0_g12_i1	422.178	614.083	0.540583	0.444543	1.13159	No	PREDICTED: ketol-acid reductoisomerase, chloroplastic	Sesamum indicum	NA	NA	NA	NA	NA
TR2163|c0_g1_i2	357.887	520.757	0.541108	0.44908	1.13179	No	PREDICTED: soluble inorganic pyrophosphatase	Sesamum indicum	NA	NA	NA	NA	NA
TR25875|c0_g1_i3	150.012	218.382	0.541773	0.493037	1.12237	No	hypothetical protein LR48_Vigan01g056100	Vigna angularis	NA	NA	NA	NA	NA
TR38112|c1_g1_i6	143.583	209.049	0.541957	0.495132	1.12132	No	hypothetical protein MIMGU_mgv1a002443mg	Mimulus guttatus	NA	signal peptide processing[GO:0006465]	peptidase activity[GO:0008233]	integral component of membrane[GO:0016021]	NA
TR36698|c1_g2_i4	137.154	199.717	0.542158	0.497328	1.12165	No	PREDICTED: E3 ubiquitin-protein ligase ATL31-like	Sesamum indicum	NA	NA	NA	NA	NA
TR44032|c0_g2_i1	2811.66	4095.13	0.542487	0.467741	1.12838	No	PREDICTED: uncharacterized protein LOC105175953	Sesamum indicum	NA	NA	NA	NA	NA
TR42743|c2_g1_i1	837.926	1220.7	0.542813	0.434583	1.12937	No	PREDICTED: vacuolar protein 8	Sesamum indicum	NA	NA	NA	NA	NA
TR31480|c0_g1_i2	117.867	171.719	0.542893	0.504412	1.12138	No	PREDICTED: cysteine desulfurase 1, mitochondrial	Sesamum indicum	NA	NA	NA	NA	NA
TR31772|c1_g1_i2	334.313	487.16	0.543195	0.449647	1.13199	No	hypothetical protein MIMGU_mgv1a006675mg	Mimulus guttatus	NA	metabolic process[GO:0008152]	hydrolase activity[GO:0016787]	NA	NA
TR42821|c0_g1_i18	111.438	162.387	0.543195	0.506874	1.12178	No	hypothetical protein MIMGU_mgv1a001411mg	Mimulus guttatus	NA	response to stress[GO:0006950] ; protein phosphorylation[GO:0006468]	protein kinase activity[GO:0004672] ; ATP binding[GO:0005524]	NA	NA
TR36246|c0_g2_i15	210.017	306.108	0.543533	0.471788	1.12547	No	PREDICTED: heptahelical transmembrane protein 2-like	Sesamum indicum	NA	NA	NA	NA	NA
TR39328|c1_g2_i1	197.159	287.443	0.543916	0.475446	1.12487	No	PREDICTED: glutathione reductase, chloroplastic	Sesamum indicum	NA	NA	NA	NA	NA
TR42281|c0_g1_i7	92.1504	134.389	0.544351	0.514024	1.1182	No	PREDICTED: uncharacterized protein LOC105950180 isoform X2	Erythranthe guttatus	NA	NA	NA	NA	NA
TR31806|c0_g1_i1	171.443	250.113	0.544852	0.483268	1.12661	No	PREDICTED: phosphatidylinositol 4-phosphate 5-kinase 8-like	Sesamum indicum	NA	NA	NA	NA	NA
TR7960|c1_g1_i3	415.748	606.617	0.545074	0.441142	1.1317	No	hypothetical protein MIMGU_mgv1a005433mg	Mimulus guttatus	NA	NA	ATP binding[GO:0005524]	integral component of membrane[GO:0016021]	NA
TR42315|c0_g1_i2	158.584	231.448	0.545434	0.487163	1.12168	No	PREDICTED: chloride channel protein CLC-d isoform X4	Sesamum indicum	NA	NA	NA	NA	NA
TR40806|c0_g3_i1	231.448	337.839	0.54565	0.464066	1.12876	No	PREDICTED: putative wall-associated receptor kinase-like 16	Sesamum indicum	NA	NA	NA	NA	NA
TR21282|c2_g1_i1	72.8631	106.391	0.546118	0.520231	1.12254	No	unknown	Lotus japonicus	NA	NA	GTP binding[GO:0005525]	NA	NA
TR27165|c0_g1_i3	72.8631	106.391	0.546118	0.520231	1.12226	No	PREDICTED: serine/threonine-protein phosphatase PP2A-4 catalytic subunit-like	Brassica napus	NA	NA	NA	NA	NA
TR3459|c0_g1_i3	364.316	531.956	0.546118	0.444238	1.13146	No	PREDICTED: tropinone reductase homolog	Sesamum indicum	NA	NA	NA	NA	NA
TR43757|c2_g3_i1	1930.87	2820.3	0.546596	0.44859	1.13215	No	PREDICTED: probable alanine--tRNA ligase, chloroplastic isoform X2	Sesamum indicum	NA	NA	NA	NA	NA
TR36912|c0_g7_i1	199.302	291.176	0.546935	0.472226	1.12586	No	PREDICTED: probable lactoylglutathione lyase, chloroplast	Sesamum indicum	NA	NA	NA	NA	NA
TR41220|c0_g1_i3	66.434	97.0587	0.546935	0.522282	1.12001	No	PREDICTED: uncharacterized protein LOC105171071	Sesamum indicum	NA	NA	NA	NA	NA
TR34388|c0_g2_i3	192.873	281.843	0.547243	0.474041	1.12463	No	PREDICTED: 60S ribosomal protein L18a-like protein	Sesamum indicum	NA	NA	NA	NA	NA
TR36784|c0_g1_i5	672.913	983.652	0.54773	0.430542	1.12939	No	PREDICTED: uncharacterized protein LOC105172991 isoform X2	Sesamum indicum	NA	NA	NA	NA	NA
TR42685|c1_g1_i4	60.0049	87.7261	0.547925	0.523934	1.11974	No	hypothetical protein MIMGU_mgv1a000210mg	Mimulus guttatus	NA	NA	NA	integral component of membrane[GO:0016021]	NA
TR3315|c0_g2_i3	60.0049	87.7261	0.547925	0.523934	1.11943	No	PREDICTED: protein RALF-like 34	Sesamum indicum	NA	NA	NA	NA	NA
TR38775|c0_g1_i5	2760.23	4037.27	0.548592	0.461984	1.13063	No	PREDICTED: translation factor GUF1 homolog, chloroplastic	Sesamum indicum	NA	NA	NA	NA	NA
TR7917|c0_g1_i6	107.152	156.787	0.549152	0.503884	1.12142	No	PREDICTED: LOW QUALITY PROTEIN: probable serine/threonine-protein kinase drkD	Sesamum indicum	NA	NA	NA	NA	NA
TR44695|c2_g2_i1	53.5758	78.3935	0.549152	0.524651	1.11953	No	PREDICTED: putative leucine-rich repeat-containing protein DDB_G0290503	Sesamum indicum	NA	NA	NA	NA	NA
TR3552|c0_g1_i2	677.199	991.118	0.549478	0.429033	1.12925	No	PREDICTED: transcription factor TCP13-like	Nicotiana tomentosiformis	NA	NA	NA	NA	NA
TR37284|c1_g1_i4	402.89	589.818	0.549883	0.437959	1.12986	No	NA	NA	NA	NA	NA	NA	NA
TR39986|c0_g1_i2	100.723	147.455	0.549883	0.506043	1.12179	No	PREDICTED: cellulose synthase-like protein D4	Erythranthe guttatus	NA	NA	NA	NA	NA
TR36519|c0_g2_i3	147.869	216.516	0.550148	0.486888	1.12375	No	PREDICTED: serine/threonine-protein phosphatase 7 long form homolog	Sesamum indicum	NA	NA	NA	NA	NA
TR38995|c0_g1_i2	289.31	423.698	0.550424	0.44902	1.13169	No	PREDICTED: cytochrome P450 724B1-like	Sesamum indicum	NA	NA	NA	NA	NA
TR37582|c0_g2_i2	94.2935	138.122	0.550713	0.50807	1.12188	No	hypothetical protein VITISV_008691	Vitis vinifera	NA	NA	NA	NA	NA
TR31100|c2_g2_i8	47.1467	69.061	0.550713	0.523527	1.11963	No	PREDICTED: cysteine-rich receptor-like protein kinase 42	Sesamum indicum	NA	NA	NA	NA	NA
TR43231|c0_g1_i1	47.1467	69.061	0.550713	0.523527	1.11959	No	argonaute 5	Salvia miltiorrhiza	NA	NA	nucleic acid binding[GO:0003676]	NA	NA
TR33470|c1_g2_i1	47.1467	69.061	0.550713	0.523527	1.11955	No	NA	NA	NA	NA	NA	NA	NA
TR44353|c0_g4_i5	47.1467	69.061	0.550713	0.523527	1.1195	No	PREDICTED: 21 kDa protein	Sesamum indicum	NA	NA	NA	NA	NA
TR43198|c0_g1_i8	182.158	266.911	0.551172	0.474343	1.1239	No	PREDICTED: U-box domain-containing protein 35	Sesamum indicum	NA	NA	NA	NA	NA
TR37695|c0_g1_i2	1277.25	1872.11	0.551629	0.433017	1.13073	No	PREDICTED: oxysterol-binding protein-related protein 3A-like	Sesamum indicum	NA	NA	NA	NA	NA
TR42456|c0_g1_i1	87.8644	128.789	0.551664	0.509869	1.11884	No	PREDICTED: kinesin-like protein KIF3A	Sesamum indicum	NA	NA	NA	NA	NA
TR36397|c0_g3_i1	216.446	317.307	0.551871	0.462889	1.12918	No	PREDICTED: dehydrogenase/reductase SDR family member 12	Sesamum indicum	NA	NA	NA	NA	NA
TR29624|c1_g1_i2	379.317	556.221	0.552254	0.43777	1.12959	No	PREDICTED: sucrose nonfermenting 4-like protein	Sesamum indicum	NA	NA	NA	NA	NA
TR34854|c1_g2_i1	407.176	597.284	0.552764	0.435228	1.1288	No	PREDICTED: pyruvate dehydrogenase E1 component subunit beta-3, chloroplastic	Sesamum indicum	NA	NA	NA	NA	NA
TR28026|c0_g1_i1	81.4353	119.457	0.552764	0.511428	1.11855	No	PREDICTED: mitochondrial inner membrane protease ATP23	Sesamum indicum	NA	NA	NA	NA	NA
TR28606|c0_g1_i1	40.7176	59.7284	0.552764	0.520454	1.11954	No	PREDICTED: CCR4-NOT transcription complex subunit 1 isoform X2	Sesamum indicum	NA	NA	NA	NA	NA
TR36739|c0_g2_i3	40.7176	59.7284	0.552764	0.520454	1.11977	No	PREDICTED: stem-specific protein TSJT1-like	Sesamum indicum	NA	NA	NA	NA	NA
TR42913|c1_g4_i5	40.7176	59.7284	0.552764	0.520454	1.1199	No	PREDICTED: 6-phosphofructo-2-kinase/fructose-2,6-bisphosphatase	Sesamum indicum	NA	NA	NA	NA	NA
TR2420|c2_g2_i4	40.7176	59.7284	0.552764	0.520454	1.12008	No	PREDICTED: WEB family protein At5g55860-like	Sesamum indicum	NA	NA	NA	NA	NA
TR33827|c0_g2_i2	40.7176	59.7284	0.552764	0.520454	1.12013	No	NA	NA	NA	NA	NA	NA	NA
TR40098|c0_g10_i2	40.7176	59.7284	0.552764	0.520454	1.11923	No	PREDICTED: protein IQ-DOMAIN 1-like	Sesamum indicum	NA	NA	NA	NA	NA
TR7589|c0_g4_i2	40.7176	59.7284	0.552764	0.520454	1.12026	No	NA	NA	NA	NA	NA	NA	NA
TR35669|c3_g1_i5	822.925	1207.63	0.553351	0.425677	1.13362	No	NA	NA	NA	NA	NA	NA	NA
TR34013|c1_g1_i2	115.724	169.853	0.553598	0.496637	1.12141	No	PREDICTED: uncharacterized protein LOC105166323	Sesamum indicum	NA	NA	NA	NA	NA
TR34069|c0_g1_i1	750.062	1101.24	0.554051	0.424894	1.13305	No	unnamed protein product	Coffea canephora	NA	proteolysis[GO:0006508]	serine-type endopeptidase activity[GO:0004252]	NA	NA
TR27898|c0_g1_i2	150.012	220.249	0.554051	0.482955	1.12642	No	NA	NA	NA	NA	NA	NA	NA
TR32864|c0_g2_i2	109.295	160.52	0.554531	0.498637	1.12007	No	PREDICTED: auxin transporter-like protein 2	Sesamum indicum	NA	NA	NA	NA	NA
TR38900|c0_g1_i10	533.615	783.935	0.554935	0.427202	1.13171	No	2-oxoglutarate/malate translocator	Medicago truncatula	NA	sodium ion transport[GO:0006814] ; transmembrane transport[GO:0055085]	transporter activity[GO:0005215]	integral component of membrane[GO:0016021]	NA
TR43015|c0_g1_i4	308.597	453.563	0.555579	0.442158	1.12917	No	hypothetical protein MIMGU_mgv1a026830mg	Mimulus guttatus	NA	NA	kinase activity[GO:0016301]	NA	NA
TR43266|c0_g10_i4	137.154	201.583	0.555579	0.48636	1.12544	No	PREDICTED: zinc finger protein CONSTANS-LIKE 9	Sesamum indicum	NA	NA	NA	NA	NA
TR37818|c1_g4_i1	34.2885	50.3959	0.555579	0.51397	1.11858	No	hypothetical protein MIMGU_mgv1a011492mg	Mimulus guttatus	NA	NA	NA	NA	NA
TR2363|c1_g1_i2	34.2885	50.3959	0.555579	0.51397	1.1189	No	PREDICTED: uncharacterized protein LOC105171682	Sesamum indicum	NA	NA	NA	NA	NA
TR36136|c0_g2_i1	34.2885	50.3959	0.555579	0.51397	1.11872	No	hypothetical protein MIMGU_mgv1a009865mg	Mimulus guttatus	NA	NA	NA	NA	NA
TR38745|c0_g6_i3	34.2885	50.3959	0.555579	0.51397	1.11853	No	PREDICTED: pinin	Sesamum indicum	NA	NA	NA	NA	NA
TR42851|c0_g6_i1	34.2885	50.3959	0.555579	0.51397	1.11913	No	hypothetical protein MIMGU_mgv1a002153mg	Mimulus guttatus	NA	transmembrane transport[GO:0055085]	transporter activity[GO:0005215]	integral component of membrane[GO:0016021]	NA
TR37850|c0_g4_i1	68.5771	100.792	0.555579	0.514573	1.11844	No	PREDICTED: uncharacterized protein LOC105169576	Sesamum indicum	NA	NA	NA	NA	NA
TR38900|c0_g1_i2	507.899	746.605	0.555804	0.427373	1.13166	No	2-oxoglutarate/malate translocator	Medicago truncatula	NA	sodium ion transport[GO:0006814] ; transmembrane transport[GO:0055085]	transporter activity[GO:0005215]	integral component of membrane[GO:0016021]	NA
TR37727|c1_g6_i2	199.302	293.043	0.556153	0.46452	1.12823	No	PREDICTED: probable protein phosphatase 2C 63	Sesamum indicum	NA	NA	NA	NA	NA
TR29567|c0_g2_i1	227.162	334.106	0.556587	0.455981	1.13155	No	NA	NA	NA	NA	NA	NA	NA
TR33901|c0_g2_i1	96.4365	141.855	0.556766	0.502357	1.12236	No	PREDICTED: E3 ubiquitin-protein ligase At1g63170-like	Sesamum indicum	NA	NA	NA	NA	NA
TR36307|c0_g3_i4	220.732	324.773	0.557134	0.457271	1.13203	No	PREDICTED: methyltransferase-like protein 13 isoform X1	Sesamum indicum	NA	NA	NA	NA	NA
TR41043|c0_g9_i3	124.296	182.918	0.55742	0.489964	1.12037	No	putative sucrose transport protein SUT1	Nicotiana langsdorffii x Nicotiana sanderae	NA	NA	NA	integral component of membrane[GO:0016021]	NA
TR36864|c0_g1_i4	62.148	91.4591	0.55742	0.515718	1.11911	No	PREDICTED: uncharacterized protein LOC105165614	Sesamum indicum	NA	NA	NA	NA	NA
TR37092|c4_g1_i3	276.451	406.9	0.557648	0.44483	1.13173	No	PREDICTED: tubulin beta-3 chain-like, partial	Oryza brachyantha	NA	NA	NA	NA	NA
TR2561|c0_g1_i2	304.311	447.963	0.557835	0.44081	1.13133	No	PREDICTED: pumilio homolog 5 isoform X2	Sesamum indicum	NA	NA	NA	NA	NA
TR44079|c0_g1_i2	90.0074	132.522	0.558121	0.503916	1.12126	No	PREDICTED: CAP-Gly domain-containing linker protein 1	Sesamum indicum	NA	NA	NA	NA	NA
TR3354|c0_g1_i1	207.874	306.108	0.55833	0.460029	1.13268	No	PREDICTED: uncharacterized protein LOC105164595	Sesamum indicum	NA	NA	NA	NA	NA
TR37168|c0_g1_i1	117.867	173.586	0.55849	0.491787	1.12181	No	PREDICTED: E3 ubiquitin ligase BIG BROTHER-related-like isoform X1	Sesamum indicum	NA	NA	NA	NA	NA
TR2687|c0_g1_i4	285.023	419.965	0.55919	0.442284	1.12916	No	PREDICTED: uncharacterized protein LOC105157888	Sesamum indicum	NA	NA	NA	NA	NA
TR34672|c0_g1_i8	167.157	246.38	0.559683	0.472501	1.12516	No	Metallo-beta-lactamase family protein isoform 1	Theobroma cacao	NA	NA	NA	NA	NA
TR39810|c0_g2_i2	139.297	205.316	0.559683	0.48222	1.1274	No	NA	NA	NA	NA	NA	NA	NA
TR2869|c0_g2_i2	27.8594	41.0633	0.559683	0.498361	1.12162	No	hypothetical protein MIMGU_mgv1a002068mg	Mimulus guttatus	NA	metabolic process[GO:0008152]	transferase activity, transferring acyl groups other than amino-acyl groups[GO:0016747]	NA	NA
TR40415|c0_g2_i3	27.8594	41.0633	0.559683	0.498361	1.12157	No	NA	NA	NA	NA	NA	NA	NA
TR43950|c0_g2_i3	27.8594	41.0633	0.559683	0.498361	1.12143	No	PREDICTED: cyclin-dependent kinase G-2-like isoform X2	Erythranthe guttatus	NA	NA	NA	NA	NA
TR32201|c0_g4_i1	27.8594	41.0633	0.559683	0.498361	1.12138	No	hypothetical protein MIMGU_mgv1a018247mg	Mimulus guttatus	NA	NA	NA	NA	NA
TR38163|c1_g1_i3	27.8594	41.0633	0.559683	0.498361	1.12133	No	PREDICTED: enoyl-CoA hydratase 2, peroxisomal	Sesamum indicum	NA	NA	NA	NA	NA
TR42406|c0_g1_i2	27.8594	41.0633	0.559683	0.498361	1.12119	No	hypothetical protein MIMGU_mgv1a008607mg	Mimulus guttatus	NA	NA	NA	NA	NA
TR34046|c0_g1_i1	27.8594	41.0633	0.559683	0.498361	1.12115	No	NA	NA	NA	NA	NA	NA	NA
TR42973|c2_g3_i1	27.8594	41.0633	0.559683	0.498361	1.12096	No	PREDICTED: mannan endo-1,4-beta-mannosidase 2-like	Sesamum indicum	NA	NA	NA	NA	NA
TR39074|c0_g3_i6	83.5783	123.19	0.559683	0.505135	1.12066	No	PREDICTED: uncharacterized protein LOC105161057	Sesamum indicum	NA	NA	NA	NA	NA
TR35092|c0_g1_i1	55.7189	82.1266	0.559683	0.51599	1.1192	No	PREDICTED: uncharacterized protein At4g37920, chloroplastic	Sesamum indicum	NA	NA	NA	NA	NA
TR40337|c0_g2_i5	132.868	195.984	0.56074	0.483832	1.1243	No	PREDICTED: putative zinc finger protein At1g68190 isoform X2	Sesamum indicum	NA	NA	NA	NA	NA
TR28826|c0_g1_i3	336.456	496.492	0.561353	0.434146	1.12856	No	hypothetical protein MIMGU_mgv1a016693mg	Mimulus guttatus	NA	NA	NA	integral component of membrane[GO:0016021]	NA
TR35119|c0_g6_i4	77.1492	113.857	0.561504	0.506276	1.12143	No	hypothetical protein MIMGU_mgv1a004971mg	Mimulus guttatus	NA	NA	NA	NA	NA
TR32372|c0_g1_i7	582.905	860.463	0.561851	0.420104	1.13126	No	PREDICTED: protein SAWADEE HOMEODOMAIN HOMOLOG 1-like	Erythranthe guttatus	NA	NA	NA	NA	NA
TR34869|c0_g3_i2	2087.31	3081.61	0.562038	0.439062	1.1308	No	NA	NA	NA	NA	NA	NA	NA
TR38133|c1_g1_i8	197.159	291.176	0.562531	0.459918	1.13261	No	NA	NA	NA	NA	NA	NA	NA
TR28418|c0_g4_i1	49.2898	72.794	0.562531	0.514566	1.11874	No	PREDICTED: UDP-glucuronate 4-epimerase 3-like	Nicotiana tomentosiformis	NA	NA	NA	NA	NA
TR37485|c0_g3_i1	49.2898	72.794	0.562531	0.514566	1.1191	No	NA	NA	NA	NA	NA	NA	NA
TR40219|c0_g1_i2	49.2898	72.794	0.562531	0.514566	1.11888	No	hypothetical protein MIMGU_mgv1a004503mg	Mimulus guttatus	NA	glycolytic process through fructose-6-phosphate[GO:0061615] ; fructose 6-phosphate metabolic process[GO:0006002]	metal ion binding[GO:0046872] ; 6-phosphofructokinase activity[GO:0003872] ; ATP binding[GO:0005524]	cytoplasm[GO:0005737]	map00030:Pentose phosphate pathway(phosphohexokinase[ec:2.7.1.11]) ; map01130:Biosynthesis of antibiotics(phosphohexokinase[ec:2.7.1.11]) ; map00052:Galactose metabolism(phosphohexokinase[ec:2.7.1.11]) ; map00051:Fructose and mannose metabolism(phosphohexokinase[ec:2.7.1.11]) ; map00010:Glycolysis / Gluconeogenesis(phosphohexokinase[ec:2.7.1.11]) ; map00680:Methane metabolism(phosphohexokinase[ec…
TR36212|c1_g3_i1	169.3	250.113	0.563	0.469037	1.12749	No	PREDICTED: equilibrative nucleotide transporter 1	Sesamum indicum	NA	NA	NA	NA	NA
TR8250|c2_g5_i3	70.7201	104.525	0.563652	0.507328	1.12213	No	NA	NA	NA	NA	NA	NA	NA
TR34577|c0_g1_i2	92.1504	136.255	0.564251	0.498209	1.12175	No	PREDICTED: probable transcription factor GLK2	Sesamum indicum	NA	NA	NA	NA	NA
TR39986|c0_g1_i1	248.592	367.703	0.564762	0.444012	1.13104	No	PREDICTED: cellulose synthase-like protein D4	Erythranthe guttatus	NA	NA	NA	NA	NA
TR26112|c0_g2_i1	1165.81	1724.66	0.564977	0.42035	1.13084	No	PREDICTED: catalase isozyme 3 isoform X2	Sesamum indicum	NA	NA	NA	NA	NA
TR35756|c1_g1_i1	177.872	263.178	0.565203	0.464236	1.12877	No	PREDICTED: uncharacterized protein LOC105178089	Sesamum indicum	NA	NA	NA	NA	NA
TR37088|c0_g1_i4	462.895	685.01	0.56544	0.421316	1.13185	No	NA	NA	NA	NA	NA	NA	NA
TR29730|c1_g4_i1	456.466	675.678	0.565827	0.421324	1.13181	No	PREDICTED: uncharacterized protein At2g27730, mitochondrial-like	Nelumbo nucifera	NA	NA	NA	NA	NA
TR1691|c0_g1_i1	21.4303	31.7307	0.566226	0.462376	1.1286	No	hypothetical protein CISIN_1g008730mg	Citrus sinensis	NA	protein dephosphorylation[GO:0006470]	phosphoprotein phosphatase activity[GO:0004721]	cytoplasm[GO:0005737] ; nucleus[GO:0005634]	map04660:T cell receptor signaling pathway(phosphatase[ec:3.1.3.16])
TR32829|c1_g5_i5	21.4303	31.7307	0.566226	0.462376	1.12875	No	Malate dehydrogenase	Morus notabilis	NA	carbohydrate metabolic process[GO:0005975] ; malate metabolic process[GO:0006108] ; tricarboxylic acid cycle[GO:0006099]	L-malate dehydrogenase activity[GO:0030060]	NA	map00630:Glyoxylate and dicarboxylate metabolism(dehydrogenase[ec:1.1.1.37]) ; map01130:Biosynthesis of antibiotics(dehydrogenase[ec:1.1.1.37]) ; map00720:Carbon fixation pathways in prokaryotes(dehydrogenase[ec:1.1.1.37]) ; map00020:Citrate cycle (TCA cycle)(dehydrogenase[ec:1.1.1.37]) ; map00620:Pyruvate metabolism(dehydrogenase[ec:1.1.1.37]) ; map00270:Cysteine and methionine metabolism(dehydr…
TR42699|c0_g4_i1	21.4303	31.7307	0.566226	0.462376	1.12978	No	PREDICTED: MACPF domain-containing protein CAD1-like	Sesamum indicum	NA	NA	NA	NA	NA
TR8216|c1_g4_i1	21.4303	31.7307	0.566226	0.462376	1.13025	No	PREDICTED: EH domain-containing protein 1-like, partial	Eucalyptus grandis	NA	NA	NA	NA	NA
TR2216|c1_g4_i6	21.4303	31.7307	0.566226	0.462376	1.13004	No	NA	NA	NA	NA	NA	NA	NA
TR31913|c1_g1_i3	21.4303	31.7307	0.566226	0.462376	1.12999	No	PREDICTED: 6,7-dimethyl-8-ribityllumazine synthase, chloroplastic	Sesamum indicum	NA	NA	NA	NA	NA
TR33378|c0_g2_i3	21.4303	31.7307	0.566226	0.462376	1.12891	No	PREDICTED: uncharacterized protein LOC105171751	Sesamum indicum	NA	NA	NA	NA	NA
TR40818|c0_g6_i9	21.4303	31.7307	0.566226	0.462376	1.12886	No	PREDICTED: histidine biosynthesis bifunctional protein hisIE, chloroplastic	Sesamum indicum	NA	NA	NA	NA	NA
TR35323|c2_g2_i1	21.4303	31.7307	0.566226	0.462376	1.12881	No	PREDICTED: zinc-finger homeodomain protein 5	Sesamum indicum	NA	NA	NA	NA	NA
TR42093|c0_g2_i5	21.4303	31.7307	0.566226	0.462376	1.12947	No	cytochrome P450 CYP71AU51	Salvia miltiorrhiza	NA	oxidation-reduction process[GO:0055114]	heme binding[GO:0020037] ; oxidoreductase activity, acting on paired donors, with incorporation or reduction of molecular oxygen[GO:0016705] ; monooxygenase activity[GO:0004497] ; iron ion binding[GO:0005506]	integral component of membrane[GO:0016021]	NA
TR38749|c0_g2_i1	150.012	222.115	0.566226	0.473063	1.12555	No	PREDICTED: probable beta-1,3-galactosyltransferase 9 isoform X1	Sesamum indicum	NA	NA	NA	NA	NA
TR36608|c0_g4_i3	128.582	190.384	0.566226	0.481124	1.12834	No	PREDICTED: fasciclin-like arabinogalactan protein 2	Sesamum indicum	NA	NA	NA	NA	NA
TR43219|c3_g12_i6	85.7213	126.923	0.566226	0.499194	1.12095	No	PREDICTED: phosphatidylinositol/phosphatidylcholine transfer protein SFH8-like	Sesamum indicum	NA	NA	NA	NA	NA
TR39115|c1_g1_i4	64.291	95.1922	0.566226	0.508015	1.12199	No	PREDICTED: inositol-tetrakisphosphate 1-kinase 2-like isoform X1	Sesamum indicum	NA	NA	NA	NA	NA
TR42637|c0_g2_i2	42.8607	63.4614	0.566226	0.510648	1.11885	No	NA	NA	NA	NA	NA	NA	NA
TR38165|c0_g2_i1	42.8607	63.4614	0.566226	0.510648	1.11853	No	hypothetical protein B456_010G127300, partial	Gossypium raimondii	NA	NA	metal ion binding[GO:0046872] ; nucleotide binding[GO:0000166]	integral component of membrane[GO:0016021]	NA
TR40510|c1_g3_i1	42.8607	63.4614	0.566226	0.510648	1.11862	No	PREDICTED: acyl-[acyl-carrier-protein] desaturase, chloroplastic-like	Nicotiana tomentosiformis	NA	NA	NA	NA	NA
TR40044|c2_g4_i1	657.911	974.32	0.566502	0.415055	1.12965	No	NA	NA	NA	NA	NA	NA	NA
TR42846|c0_g1_i1	143.583	212.782	0.567492	0.474323	1.1241	No	PREDICTED: receptor-like protein kinase HSL1	Sesamum indicum	NA	NA	NA	NA	NA
TR8137|c0_g4_i1	589.334	873.528	0.567768	0.415071	1.12963	No	PREDICTED: uncharacterized protein LOC105957651	Erythranthe guttatus	NA	NA	NA	NA	NA
TR32530|c2_g3_i5	100.723	149.321	0.56803	0.491592	1.12156	No	hypothetical protein CISIN_1g004592mg	Citrus sinensis	NA	NA	NA	NA	NA
TR42720|c0_g4_i11	158.584	235.181	0.568518	0.468285	1.1269	No	NA	NA	NA	NA	NA	NA	NA
TR36124|c0_g4_i1	79.2922	117.59	0.568518	0.499898	1.12112	No	NA	NA	NA	NA	NA	NA	NA
TR36487|c0_g2_i2	252.878	375.169	0.5691	0.439516	1.13137	No	PREDICTED: probable protein phosphatase 2C 10	Sesamum indicum	NA	NA	NA	NA	NA
TR33287|c0_g4_i1	57.8619	85.8596	0.569366	0.507893	1.12255	No	NA	NA	NA	NA	NA	NA	NA
TR42006|c1_g2_i3	57.8619	85.8596	0.569366	0.507893	1.1225	No	NA	NA	NA	NA	NA	NA	NA
TR42376|c2_g2_i1	340.742	505.825	0.569957	0.426564	1.13423	No	PREDICTED: cyclin-dependent kinase F-4-like isoform X1	Sesamum indicum	NA	NA	NA	NA	NA
TR35173|c0_g1_i4	188.587	279.977	0.570078	0.456552	1.13192	No	unnamed protein product	Coffea canephora	NA	NA	NA	NA	NA
TR29041|c0_g2_i8	936.506	1390.55	0.570298	0.412839	1.12665	No	PREDICTED: 30S ribosomal protein S13, chloroplastic	Sesamum indicum	NA	NA	NA	NA	NA
TR43986|c2_g5_i1	109.295	162.387	0.571209	0.485331	1.12491	No	AF110228_1nuclear RNA binding protein A	Spinacia oleracea	NA	NA	NA	NA	NA
TR33779|c0_g2_i1	72.8631	108.258	0.571209	0.50051	1.1215	No	PREDICTED: caffeoylshikimate esterase	Sesamum indicum	NA	NA	NA	NA	NA
TR43457|c0_g2_i2	36.4316	54.1289	0.571209	0.503802	1.12156	No	PREDICTED: LRR receptor-like serine/threonine-protein kinase HSL2	Sesamum indicum	NA	NA	NA	NA	NA
TR34445|c0_g2_i1	36.4316	54.1289	0.571209	0.503802	1.12193	No	PREDICTED: pentatricopeptide repeat-containing protein At1g12775, mitochondrial-like	Sesamum indicum	NA	NA	NA	NA	NA
TR42506|c1_g1_i8	36.4316	54.1289	0.571209	0.503802	1.12184	No	PREDICTED: putative 1-phosphatidylinositol-3-phosphate 5-kinase FAB1D	Sesamum indicum	NA	NA	NA	NA	NA
TR2250|c3_g1_i1	1232.24	1831.05	0.571382	0.416231	1.12901	No	PREDICTED: uncharacterized protein LOC105163222	Sesamum indicum	NA	NA	NA	NA	NA
TR37808|c0_g1_i3	175.729	261.312	0.572422	0.45909	1.13203	No	PREDICTED: GTP-binding protein At2g22870	Nelumbo nucifera	NA	NA	NA	NA	NA
TR39694|c0_g1_i2	2468.77	3671.43	0.572547	0.437893	1.12975	No	PREDICTED: uncharacterized protein LOC105177775	Sesamum indicum	NA	NA	NA	NA	NA
TR37022|c0_g2_i1	102.866	153.054	0.573281	0.486514	1.12429	No	PREDICTED: peptide chain release factor PrfB3, chloroplastic isoform X2	Sesamum indicum	NA	NA	NA	NA	NA
TR41383|c0_g2_i2	51.4328	76.527	0.573281	0.506224	1.12192	No	PREDICTED: nicastrin	Sesamum indicum	NA	NA	NA	NA	NA
TR40399|c0_g2_i9	51.4328	76.527	0.573281	0.506224	1.12196	No	NA	NA	NA	NA	NA	NA	NA
TR41016|c0_g1_i2	169.3	251.979	0.573726	0.460303	1.13288	No	hypothetical protein MIMGU_mgv1a004398mg	Mimulus guttatus	NA	NA	NA	integral component of membrane[GO:0016021]	NA
TR36395|c1_g2_i3	117.867	175.452	0.57392	0.479457	1.12764	No	PREDICTED: Golgi to ER traffic protein 4 homolog	Sesamum indicum	NA	NA	NA	NA	NA
TR2807|c0_g1_i6	66.434	98.9252	0.574415	0.50078	1.12169	No	PREDICTED: lamin-like protein-like	Solanum tuberosum	NA	NA	electron carrier activity[GO:0009055]	NA	NA
TR32994|c0_g1_i3	362.173	539.422	0.574737	0.420557	1.13117	No	PREDICTED: uncharacterized protein LOC105172402	Sesamum indicum	NA	NA	NA	NA	NA
TR43442|c0_g1_i2	636.481	948.189	0.575057	0.408296	1.12393	No	PREDICTED: pentatricopeptide repeat-containing protein At4g30825, chloroplastic	Sesamum indicum	NA	NA	NA	NA	NA
TR41120|c0_g2_i3	340.742	507.692	0.575271	0.422192	1.13193	No	PREDICTED: GRAM domain-containing protein 1A	Sesamum indicum	NA	NA	NA	NA	NA
TR3320|c0_g2_i6	289.31	431.165	0.575625	0.428095	1.13128	No	PREDICTED: uncharacterized protein LOC105177020	Sesamum indicum	NA	NA	NA	NA	NA
TR35496|c0_g1_i1	96.4365	143.722	0.575625	0.487468	1.1217	No	hypothetical protein MIMGU_mgv1a0067461mg, partial	Mimulus guttatus	NA	NA	NA	NA	NA
TR41915|c0_g3_i2	565.761	843.664	0.576476	0.408467	1.12429	No	PREDICTED: ultraviolet-B receptor UVR8 isoform X2	Sesamum indicum	NA	NA	NA	NA	NA
TR37859|c0_g1_i1	327.884	489.026	0.576726	0.422374	1.13225	No	PREDICTED: probable protein phosphatase 2C 49	Sesamum indicum	NA	NA	NA	NA	NA
TR34258|c1_g3_i3	1045.8	1560.4	0.577313	0.408617	1.12441	No	isocitrate dehydrogenase (NADP+)	Eucalyptus globulus subsp. bicostata	NA	isocitrate metabolic process[GO:0006102] ; oxidation-reduction process[GO:0055114]	NAD binding[GO:0051287] ; isocitrate dehydrogenase (NADP+) activity[GO:0004450] ; magnesium ion binding[GO:0000287]	NA	map00480:Glutathione metabolism(dehydrogenase (NADP+)[ec:1.1.1.42]) ; map01130:Biosynthesis of antibiotics(dehydrogenase (NADP+)[ec:1.1.1.42]) ; map00720:Carbon fixation pathways in prokaryotes(dehydrogenase (NADP+)[ec:1.1.1.42]) ; map00020:Citrate cycle (TCA cycle)(dehydrogenase (NADP+)[ec:1.1.1.42])
TR36384|c0_g5_i1	1602.99	2392.87	0.577977	0.417457	1.1301	No	PREDICTED: sec-independent protein translocase protein TATC, chloroplastic	Sesamum indicum	NA	NA	NA	NA	NA
TR43224|c1_g7_i3	135.011	201.583	0.578299	0.468908	1.12733	No	PREDICTED: acetolactate synthase 1, chloroplastic	Sesamum indicum	NA	NA	NA	NA	NA
TR35589|c0_g2_i7	105.009	156.787	0.578299	0.481622	1.12719	No	hypothetical protein MIMGU_mgv1a011685mg	Mimulus guttatus	NA	NA	NA	NA	NA
TR43774|c0_g1_i4	90.0074	134.389	0.578299	0.488081	1.1222	No	PREDICTED: uncharacterized protein LOC105157959	Sesamum indicum	NA	NA	NA	NA	NA
TR7858|c0_g1_i1	75.0062	111.991	0.578299	0.494087	1.1218	No	Basic helix-loop-helix DNA-binding superfamily protein isoform 2	Theobroma cacao	NA	regulation of transcription, DNA-templated[GO:0006355] ; double fertilization forming a zygote and endosperm[GO:0009567]	transcription factor activity, sequence-specific DNA binding[GO:0003700] ; DNA binding[GO:0003677] ; protein dimerization activity[GO:0046983]	plasmodesma[GO:0009506] ; integral component of membrane[GO:0016021]	NA
TR36249|c0_g2_i1	75.0062	111.991	0.578299	0.494087	1.12185	No	NA	NA	NA	NA	NA	NA	NA
TR30954|c0_g2_i1	45.0037	67.1945	0.578299	0.501875	1.12198	No	PREDICTED: signal recognition particle receptor subunit beta-like isoform X1	Sesamum indicum	NA	NA	NA	NA	NA
TR42401|c0_g3_i3	45.0037	67.1945	0.578299	0.501875	1.12221	No	PREDICTED: uncharacterized protein LOC105177282	Sesamum indicum	NA	NA	NA	NA	NA
TR34531|c0_g6_i1	15.0012	22.3982	0.578299	0.390082	1.13845	No	PREDICTED: membrane-anchored ubiquitin-fold protein 3-like	Sesamum indicum	NA	NA	NA	NA	NA
TR41496|c0_g4_i21	15.0012	22.3982	0.578299	0.390082	1.13839	No	hypothetical protein MIMGU_mgv1a014396mg	Mimulus guttatus	NA	NA	NA	NA	NA
TR28037|c0_g1_i1	15.0012	22.3982	0.578299	0.390082	1.13832	No	hypothetical protein Csa_3G827290	Cucumis sativus	NA	ATP hydrolysis coupled proton transport[GO:0015991]	hydrogen ion transmembrane transporter activity[GO:0015078]	proton-transporting V-type ATPase, V0 domain[GO:0033179]	NA
TR34570|c3_g5_i1	15.0012	22.3982	0.578299	0.390082	1.13808	No	NA	NA	NA	NA	NA	NA	NA
TR36232|c0_g14_i1	15.0012	22.3982	0.578299	0.390082	1.13801	No	NA	NA	NA	NA	NA	NA	NA
TR42169|c0_g2_i3	15.0012	22.3982	0.578299	0.390082	1.13795	No	PREDICTED: MLO-like protein 1 isoform X2	Sesamum indicum	NA	NA	NA	NA	NA
TR44483|c2_g5_i1	15.0012	22.3982	0.578299	0.390082	1.13777	No	PREDICTED: MATH domain-containing protein At5g43560-like	Sesamum indicum	NA	NA	NA	NA	NA
TR27227|c0_g9_i1	15.0012	22.3982	0.578299	0.390082	1.13826	No	hypothetical protein PRUPE_ppb021028mg	Prunus persica	NA	NA	NA	NA	NA
TR35027|c0_g2_i1	15.0012	22.3982	0.578299	0.390082	1.13932	No	NA	NA	NA	NA	NA	NA	NA
TR42083|c0_g6_i11	15.0012	22.3982	0.578299	0.390082	1.13919	No	hypothetical protein MIMGU_mgv1a003403mg	Mimulus guttatus	NA	amino acid transmembrane transport[GO:0003333]	amino acid transmembrane transporter activity[GO:0015171]	integral component of membrane[GO:0016021]	NA
TR43303|c0_g4_i2	15.0012	22.3982	0.578299	0.390082	1.13764	No	hypothetical protein MIMGU_mgv1a024408mg	Mimulus guttatus	NA	NA	NA	NA	NA
TR34841|c0_g1_i2	120.01	179.185	0.578299	0.475067	1.12437	No	PREDICTED: pentatricopeptide repeat-containing protein At5g21222-like	Sesamum indicum	NA	NA	NA	NA	NA
TR30003|c0_g1_i1	30.0025	44.7963	0.578299	0.489517	1.12055	No	PREDICTED: E3 SUMO-protein ligase SIZ1 isoform X2	Sesamum indicum	NA	NA	NA	NA	NA
TR43208|c4_g2_i1	30.0025	44.7963	0.578299	0.489517	1.12007	No	NA	NA	NA	NA	NA	NA	NA
TR2539|c0_g3_i1	30.0025	44.7963	0.578299	0.489517	1.12126	No	NA	NA	NA	NA	NA	NA	NA
TR32152|c0_g1_i1	30.0025	44.7963	0.578299	0.489517	1.12016	No	PREDICTED: reticulon-like protein B8	Sesamum indicum	NA	NA	NA	NA	NA
TR42395|c0_g2_i5	30.0025	44.7963	0.578299	0.489517	1.12107	No	hypothetical protein MIMGU_mgv1a002248mg	Mimulus guttatus	NA	regulation of transcription, DNA-templated[GO:0006355] ; transcription, DNA-templated[GO:0006351]	NA	NA	NA
TR32808|c0_g2_i5	30.0025	44.7963	0.578299	0.489517	1.12102	No	unnamed protein product	Coffea canephora	NA	NA	NA	integral component of membrane[GO:0016021]	NA
TR42694|c1_g6_i1	30.0025	44.7963	0.578299	0.489517	1.12011	No	PREDICTED: myosin-14	Sesamum indicum	NA	NA	NA	NA	NA
TR25264|c0_g1_i1	60.0049	89.5926	0.578299	0.500304	1.12147	No	hypothetical protein MIMGU_mgv1a026980mg	Mimulus guttatus	NA	NA	NA	NA	NA
TR34016|c0_g2_i4	713.63	1065.78	0.57866	0.404746	1.12978	No	PREDICTED: copper chaperone for superoxide dismutase, chloroplastic/cytosolic	Sesamum indicum	NA	NA	NA	NA	NA
TR35669|c3_g1_i1	1116.52	1668.66	0.579683	0.407761	1.1239	No	PREDICTED: uncharacterized protein LOC105158192	Sesamum indicum	NA	NA	NA	NA	NA
TR27470|c0_g2_i4	158.584	237.047	0.579923	0.459097	1.132	No	NA	NA	NA	NA	NA	NA	NA
TR40045|c2_g1_i6	499.327	746.605	0.580361	0.407423	1.12384	No	4-coumarate:coenzyme A ligase 5	Salvia miltiorrhiza	NA	metabolic process[GO:0008152]	ligase activity[GO:0016874]	integral component of membrane[GO:0016021]	NA
TR22846|c0_g1_i2	98.5795	147.455	0.58091	0.482405	1.12715	No	PREDICTED: ultraviolet-B receptor UVR8 isoform X2	Sesamum indicum	NA	NA	NA	NA	NA
TR41233|c0_g5_i2	98.5795	147.455	0.58091	0.482405	1.12705	No	hypothetical protein MIMGU_mgv1a003572mg	Mimulus guttatus	NA	NA	NA	Golgi transport complex[GO:0017119]	NA
TR40337|c0_g2_i10	167.157	250.113	0.581378	0.454888	1.13204	No	PREDICTED: putative zinc finger protein At1g68190 isoform X1	Sesamum indicum	NA	NA	NA	NA	NA
TR26156|c0_g4_i5	83.5783	125.056	0.581378	0.488206	1.12061	No	NA	NA	NA	NA	NA	NA	NA
TR42819|c3_g2_i1	1225.82	1834.78	0.581867	0.407753	1.12394	No	PREDICTED: E3 ubiquitin-protein ligase COP1-like	Sesamum indicum	NA	NA	NA	NA	NA
TR35403|c0_g1_i1	68.5771	102.658	0.582051	0.493973	1.12264	No	PREDICTED: cystinosin homolog isoform X1	Sesamum indicum	NA	NA	NA	NA	NA
TR39359|c0_g1_i1	175.729	263.178	0.582691	0.450775	1.13137	No	PREDICTED: uncharacterized protein LOC105949957 isoform X2	Erythranthe guttatus	NA	NA	NA	NA	NA
TR40733|c2_g2_i1	160.728	240.78	0.5831	0.455797	1.13141	No	PREDICTED: uncharacterized protein LOC105176924	Sesamum indicum	NA	NA	NA	NA	NA
TR35717|c1_g5_i1	107.152	160.52	0.5831	0.476906	1.12629	No	PREDICTED: uncharacterized protein LOC105176468	Sesamum indicum	NA	NA	NA	NA	NA
TR24649|c0_g1_i1	53.5758	80.2601	0.5831	0.498422	1.12058	No	PREDICTED: thaumatin-like protein 1b	Sesamum indicum	NA	NA	NA	NA	NA
TR43449|c1_g7_i1	53.5758	80.2601	0.5831	0.498422	1.12044	No	unnamed protein product	Vitis vinifera	NA	NA	NA	NA	NA
TR42396|c5_g1_i1	53.5758	80.2601	0.5831	0.498422	1.12025	No	PREDICTED: receptor-like protein 12	Erythranthe guttatus	NA	NA	NA	NA	NA
TR3802|c0_g1_i5	237.877	356.504	0.583704	0.430884	1.1299	No	hypothetical protein M569_04846, partial	Genlisea aurea	NA	NA	nucleotide binding[GO:0000166]	NA	NA
TR3879|c0_g1_i1	92.1504	138.122	0.58388	0.482856	1.12737	No	hypothetical protein JCGZ_21680	Jatropha curcas	NA	NA	NA	NA	NA
TR44315|c0_g4_i4	130.725	195.984	0.584199	0.465932	1.12951	No	PREDICTED: B3 domain-containing transcription repressor VAL2	Sesamum indicum	NA	NA	NA	NA	NA
TR3360|c1_g1_i1	377.174	565.553	0.584434	0.411335	1.12634	No	phenylalanine ammonia-lyase	Solenostemon scutellarioides	NA	cinnamic acid biosynthetic process[GO:0009800] ; L-phenylalanine catabolic process[GO:0006559]	phenylalanine ammonia-lyase activity[GO:0045548]	cytoplasm[GO:0005737]	map00940:Phenylpropanoid biosynthesis(ammonia-lyase[ec:4.3.1.25]) ; map00940:Phenylpropanoid biosynthesis(ammonia-lyase[ec:4.3.1.24]) ; map00360:Phenylalanine metabolism(ammonia-lyase[ec:4.3.1.25]) ; map00360:Phenylalanine metabolism(ammonia-lyase[ec:4.3.1.24])
TR38007|c0_g8_i1	115.724	173.586	0.584963	0.471663	1.12532	No	hypothetical protein MIMGU_mgv1a010107mg	Mimulus guttatus	NA	NA	NA	NA	NA
TR3857|c0_g2_i4	77.1492	115.724	0.584963	0.488031	1.12218	No	PREDICTED: outer envelope pore protein 16, chloroplastic	Musa acuminata subsp. malaccensis	NA	transmembrane transport[GO:0055085] ; organic substance transport[GO:0071702]	NA	intracellular membrane-bounded organelle[GO:0043231] ; cytoplasmic part[GO:0044444] ; membrane[GO:0016020]	NA
TR41189|c1_g2_i1	38.5746	57.8619	0.584963	0.494654	1.12162	No	PREDICTED: protease Do-like 9 isoform X2	Sesamum indicum	NA	NA	NA	NA	NA
TR17986|c1_g1_i1	38.5746	57.8619	0.584963	0.494654	1.1218	No	NA	NA	NA	NA	NA	NA	NA
TR36597|c0_g2_i8	38.5746	57.8619	0.584963	0.494654	1.12223	No	NA	NA	NA	NA	NA	NA	NA
TR29303|c0_g1_i4	38.5746	57.8619	0.584963	0.494654	1.12176	No	NA	NA	NA	NA	NA	NA	NA
TR40307|c0_g4_i5	216.446	324.773	0.585423	0.435192	1.12876	No	PREDICTED: CAX-interacting protein 4-like	Sesamum indicum	NA	NA	NA	NA	NA
TR23694|c0_g1_i2	100.723	151.188	0.585952	0.47753	1.12622	No	unnamed protein product	Coffea canephora	NA	NA	NA	NA	NA
TR16253|c0_g1_i1	186.444	279.977	0.586566	0.443887	1.13099	No	putative actin family protein	Zea mays	NA	NA	ATP binding[GO:0005524]	NA	NA
TR29105|c2_g2_i1	62.148	93.3257	0.586566	0.493175	1.12225	No	hypothetical protein B456_006G267400	Gossypium raimondii	NA	translational frameshifting[GO:0006452] ; positive regulation of translational termination[GO:0045905] ; positive regulation of translational elongation[GO:0045901]	translation elongation factor activity[GO:0003746] ; ribosome binding[GO:0043022]	NA	NA
TR23081|c0_g1_i1	62.148	93.3257	0.586566	0.493175	1.12216	No	PREDICTED: peroxidase 21	Sesamum indicum	NA	NA	NA	NA	NA
TR29288|c0_g1_i1	85.7213	128.789	0.587288	0.482831	1.12741	No	PREDICTED: transcription factor DIVARICATA	Sesamum indicum	NA	NA	NA	NA	NA
TR34803|c1_g2_i1	132.868	199.717	0.587962	0.462097	1.13075	No	hypothetical protein MIMGU_mgv1a015819mg	Mimulus guttatus	NA	NA	NA	NA	NA
TR40088|c0_g1_i9	336.456	505.825	0.588219	0.412093	1.12657	No	PREDICTED: uncharacterized protein LOC105163859	Sesamum indicum	NA	NA	NA	NA	NA
TR32478|c0_g1_i1	3771.74	5672.33	0.588712	0.447594	1.13172	No	PREDICTED: rubisco accumulation factor 1, chloroplastic	Sesamum indicum	NA	NA	NA	NA	NA
TR37063|c3_g3_i1	188.587	283.71	0.589187	0.441038	1.13159	No	PREDICTED: glycine--tRNA ligase 1, mitochondrial-like	Nicotiana sylvestris	NA	NA	NA	NA	NA
TR31068|c0_g2_i1	23.5734	35.4637	0.589187	0.457374	1.13176	No	putative clathrin heavy chain family protein	Zea mays	NA	vesicle-mediated transport[GO:0016192] ; intracellular protein transport[GO:0006886]	structural molecule activity[GO:0005198]	integral component of membrane[GO:0016021] ; clathrin coat of coated pit[GO:0030132] ; clathrin coat of trans-Golgi network vesicle[GO:0030130]	NA
TR37647|c0_g2_i1	23.5734	35.4637	0.589187	0.457374	1.13197	No	PREDICTED: UPF0586 protein C9orf41 homolog	Erythranthe guttatus	NA	NA	NA	NA	NA
TR13459|c0_g1_i1	23.5734	35.4637	0.589187	0.457374	1.13192	No	PREDICTED: LOW QUALITY PROTEIN: protein SGT1 homolog	Sesamum indicum	NA	NA	NA	NA	NA
TR32050|c2_g3_i1	23.5734	35.4637	0.589187	0.457374	1.13187	No	hypothetical protein MIMGU_mgv1a016964mg	Mimulus guttatus	NA	translation[GO:0006412]	structural constituent of ribosome[GO:0003735]	ribosome[GO:0005840]	NA
TR37727|c1_g4_i1	23.5734	35.4637	0.589187	0.457374	1.13139	No	hypothetical protein MIMGU_mgv1a0096371mg, partial	Mimulus guttatus	NA	NA	hydrolase activity[GO:0016787]	NA	NA
TR39264|c0_g3_i1	23.5734	35.4637	0.589187	0.457374	1.13134	No	PREDICTED: heat shock factor protein HSF30	Sesamum indicum	NA	NA	NA	NA	NA
TR32818|c0_g1_i3	23.5734	35.4637	0.589187	0.457374	1.13124	No	NA	NA	NA	NA	NA	NA	NA
TR40496|c1_g2_i5	117.867	177.319	0.589187	0.467414	1.1284	No	NA	NA	NA	NA	NA	NA	NA
TR29515|c0_g1_i1	70.7201	106.391	0.589187	0.487562	1.12187	No	Dihydrodipicolinate synthase isoform 1	Theobroma cacao	NA	lysine biosynthetic process via diaminopimelate[GO:0009089]	4-hydroxy-tetrahydrodipicolinate synthase[GO:0008840]	NA	map00261:Monobactam biosynthesis(synthase[ec:4.3.3.7]) ; map01130:Biosynthesis of antibiotics(synthase[ec:4.3.3.7]) ; map00300:Lysine biosynthesis(synthase[ec:4.3.3.7])
TR31069|c0_g5_i1	47.1467	70.9275	0.589187	0.494024	1.12209	No	unnamed protein product	Coffea canephora	NA	NA	NA	NA	NA
TR37992|c0_g1_i1	47.1467	70.9275	0.589187	0.494024	1.12218	No	NA	NA	NA	NA	NA	NA	NA
TR34205|c0_g4_i2	47.1467	70.9275	0.589187	0.494024	1.12204	No	NA	NA	NA	NA	NA	NA	NA
TR8218|c2_g5_i4	47.1467	70.9275	0.589187	0.494024	1.12228	No	hypothetical protein MIMGU_mgv1a018388mg, partial	Mimulus guttatus	NA	NA	NA	NA	NA
TR32188|c3_g1_i2	1148.67	1728.39	0.58947	0.400499	1.13185	No	hypothetical protein MIMGU_mgv1a010993mg	Mimulus guttatus	NA	regulation of transcription, DNA-templated[GO:0006355] ; transcription, DNA-templated[GO:0006351]	DNA binding[GO:0003677]	nucleus[GO:0005634]	NA
TR43375|c0_g1_i1	244.306	367.703	0.589853	0.424395	1.13262	No	PREDICTED: probable leucine-rich repeat receptor-like protein kinase At2g33170	Sesamum indicum	NA	NA	NA	NA	NA
TR43161|c1_g8_i4	844.355	1271.1	0.59015	0.395921	1.13417	No	PREDICTED: probable galactinol--sucrose galactosyltransferase 1	Sesamum indicum	NA	NA	NA	NA	NA
TR41736|c0_g1_i2	402.89	606.617	0.590398	0.404525	1.12934	No	PREDICTED: serine/threonine-protein kinase BRI1-like 2	Erythranthe guttatus	NA	NA	NA	NA	NA
TR39208|c0_g1_i2	126.439	190.384	0.590473	0.462748	1.12894	No	PREDICTED: serine/threonine protein phosphatase 2A 57 kDa regulatory subunit B' theta isoform-like	Sesamum indicum	NA	NA	NA	NA	NA
TR33426|c0_g1_i6	102.866	154.921	0.590768	0.472833	1.1253	No	hypothetical protein MIMGU_mgv1a0026502mg, partial	Mimulus guttatus	NA	NA	NA	membrane[GO:0016020]	NA
TR38245|c0_g1_i3	3898.18	5872.05	0.591064	0.447669	1.13185	No	hypothetical protein JCGZ_19647	Jatropha curcas	NA	glycolytic process[GO:0006096]	fructose-bisphosphate aldolase activity[GO:0004332]	NA	map00030:Pentose phosphate pathway(aldolase[ec:4.1.2.13]) ; map01130:Biosynthesis of antibiotics(aldolase[ec:4.1.2.13]) ; map00051:Fructose and mannose metabolism(aldolase[ec:4.1.2.13]) ; map00710:Carbon fixation in photosynthetic organisms(aldolase[ec:4.1.2.13]) ; map00010:Glycolysis / Gluconeogenesis(aldolase[ec:4.1.2.13]) ; map00680:Methane metabolism(aldolase[ec:4.1.2.13])
TR7990|c2_g1_i3	79.2922	119.457	0.591238	0.482318	1.12749	No	hypothetical protein MIMGU_mgv1a025084mg, partial	Mimulus guttatus	NA	cellular process[GO:0009987]	NA	NA	NA
TR43396|c0_g1_i3	469.324	707.408	0.591958	0.399354	1.13412	No	PREDICTED: protein NLP7 isoform X1	Sesamum indicum	NA	NA	NA	NA	NA
TR36984|c0_g1_i4	111.438	167.986	0.592105	0.467964	1.12871	No	PREDICTED: uncharacterized protein LOC105163168	Sesamum indicum	NA	NA	NA	NA	NA
TR33901|c0_g3_i1	55.7189	83.9931	0.592105	0.491102	1.12101	No	PREDICTED: E3 ubiquitin-protein ligase At1g63170-like	Sesamum indicum	NA	NA	NA	NA	NA
TR3257|c0_g3_i1	55.7189	83.9931	0.592105	0.491102	1.1212	No	PREDICTED: uncharacterized protein LOC105951587	Erythranthe guttatus	NA	NA	NA	NA	NA
TR35296|c0_g1_i1	987.938	1489.48	0.592313	0.395891	1.1342	No	PREDICTED: aquaporin TIP1-1-like	Sesamum indicum	NA	NA	NA	NA	NA
TR38198|c0_g4_i3	143.583	216.516	0.592583	0.454327	1.13354	No	PREDICTED: uncharacterized protein LOC105160203	Sesamum indicum	NA	NA	NA	NA	NA
TR35309|c0_g1_i5	175.729	265.045	0.592886	0.442597	1.12953	No	PREDICTED: uncharacterized protein LOC105161520 isoform X1	Sesamum indicum	NA	NA	NA	NA	NA
TR40891|c1_g2_i7	87.8644	132.522	0.592886	0.477676	1.12637	No	hypothetical protein MIMGU_mgv1a023988mg, partial	Mimulus guttatus	NA	NA	NA	NA	NA
TR42758|c0_g2_i1	152.155	229.581	0.593459	0.45058	1.1312	No	PREDICTED: UV-stimulated scaffold protein A homolog	Sesamum indicum	NA	NA	NA	NA	NA
TR28725|c0_g1_i1	225.019	339.705	0.59424	0.42565	1.1336	No	PREDICTED: transmembrane 9 superfamily member 11	Sesamum indicum	NA	NA	NA	NA	NA
TR32754|c0_g4_i4	32.1455	48.5293	0.59424	0.481396	1.12809	No	hypothetical protein MIMGU_mgv1a014622mg	Mimulus guttatus	NA	NA	NA	NA	NA
TR40514|c0_g1_i4	32.1455	48.5293	0.59424	0.481396	1.12749	No	hypothetical protein MIMGU_mgv1a013501mg	Mimulus guttatus	NA	NA	NA	membrane[GO:0016020]	NA
TR44020|c4_g11_i1	32.1455	48.5293	0.59424	0.481396	1.12858	No	NA	NA	NA	NA	NA	NA	NA
TR33457|c0_g1_i2	32.1455	48.5293	0.59424	0.481396	1.12779	No	hypothetical protein MIMGU_mgv1a010500mg	Mimulus guttatus	NA	NA	NA	NA	NA
TR44128|c1_g1_i2	32.1455	48.5293	0.59424	0.481396	1.12794	No	PREDICTED: uncharacterized protein LOC105180295	Sesamum indicum	NA	NA	NA	NA	NA
TR41431|c0_g2_i1	32.1455	48.5293	0.59424	0.481396	1.12769	No	PREDICTED: laccase-11-like	Sesamum indicum	NA	NA	NA	NA	NA
TR30203|c0_g1_i1	64.291	97.0587	0.59424	0.486466	1.12462	No	PREDICTED: putative 1-phosphatidylinositol-3-phosphate 5-kinase FAB1D	Sesamum indicum	NA	NA	NA	NA	NA
TR41060|c0_g1_i1	741.49	1119.91	0.594882	0.391703	1.13741	No	PREDICTED: pentatricopeptide repeat-containing protein At5g02830, chloroplastic	Sesamum indicum	NA	NA	NA	NA	NA
TR38275|c2_g1_i2	177.872	268.778	0.595577	0.439684	1.13126	No	PREDICTED: double-stranded RNA-binding protein 3-like isoform X1	Sesamum indicum	NA	NA	NA	NA	NA
TR30410|c0_g1_i1	145.726	220.249	0.595871	0.450953	1.13156	No	PREDICTED: uncharacterized protein LOC105971525	Erythranthe guttatus	NA	NA	NA	NA	NA
TR31842|c0_g3_i2	72.8631	110.124	0.595871	0.481517	1.12719	No	PREDICTED: protein TIME FOR COFFEE	Sesamum indicum	NA	NA	NA	NA	NA
TR36099|c0_g1_i9	72.8631	110.124	0.595871	0.481517	1.12738	No	NA	NA	NA	NA	NA	NA	NA
TR38450|c1_g1_i1	1069.37	1616.4	0.596018	0.394139	1.1355	No	PREDICTED: tubby-like F-box protein 6	Sesamum indicum	NA	NA	NA	NA	NA
TR42326|c0_g1_i9	113.581	171.719	0.596333	0.463722	1.12982	No	NA	NA	NA	NA	NA	NA	NA
TR31508|c0_g2_i2	642.91	972.453	0.597012	0.390549	1.13801	No	PREDICTED: peroxiredoxin-2F, mitochondrial	Sesamum indicum	NA	NA	NA	NA	NA
TR3421|c1_g3_i1	122.153	184.785	0.597158	0.459332	1.132	No	hypothetical protein B456_007G014500	Gossypium raimondii	NA	NA	nucleotide binding[GO:0000166]	NA	NA
TR34336|c0_g1_i9	40.7176	61.5949	0.597158	0.486405	1.12525	No	PREDICTED: ATPase family AAA domain-containing protein 1	Nicotiana sylvestris	NA	NA	NA	NA	NA
TR41447|c3_g2_i2	40.7176	61.5949	0.597158	0.486405	1.12545	No	PREDICTED: putative E3 ubiquitin-protein ligase XBAT31	Sesamum indicum	NA	NA	NA	NA	NA
TR28227|c0_g2_i2	40.7176	61.5949	0.597158	0.486405	1.12515	No	NA	NA	NA	NA	NA	NA	NA
TR36846|c0_g5_i1	40.7176	61.5949	0.597158	0.486405	1.12472	No	PREDICTED: transcription factor GTE4 isoform X2	Sesamum indicum	NA	NA	NA	NA	NA
TR39979|c0_g1_i6	40.7176	61.5949	0.597158	0.486405	1.12506	No	NA	NA	NA	NA	NA	NA	NA
TR37246|c0_g1_i5	2492.35	3772.22	0.597909	0.418929	1.13128	No	PREDICTED: protein TIC 62, chloroplastic	Sesamum indicum	NA	NA	NA	NA	NA
TR28878|c2_g1_i3	4110.34	6222.95	0.598343	0.445282	1.13202	No	PREDICTED: glutamine synthetase leaf isozyme, chloroplastic	Sesamum indicum	NA	NA	NA	NA	NA
TR12688|c0_g1_i1	139.297	210.916	0.598502	0.451293	1.13145	No	NA	NA	NA	NA	NA	NA	NA
TR40377|c2_g1_i1	147.869	223.982	0.599057	0.447681	1.13177	No	PREDICTED: uncharacterized protein LOC105167598	Sesamum indicum	NA	NA	NA	NA	NA
TR33184|c0_g1_i3	98.5795	149.321	0.599057	0.468339	1.12672	No	hypothetical protein M569_05419, partial	Genlisea aurea	NA	metabolic process[GO:0008152]	hydrolase activity[GO:0016787]	NA	NA
TR39236|c0_g1_i8	49.2898	74.6605	0.599057	0.486778	1.12383	No	PREDICTED: LOW QUALITY PROTEIN: probable polyol transporter 4	Sesamum indicum	NA	NA	NA	NA	NA
TR32202|c0_g1_i3	49.2898	74.6605	0.599057	0.486778	1.12388	No	PREDICTED: L-ascorbate peroxidase 3, peroxisomal-like	Nicotiana sylvestris	NA	NA	NA	NA	NA
TR43626|c2_g2_i6	49.2898	74.6605	0.599057	0.486778	1.12403	No	NA	NA	NA	NA	NA	NA	NA
TR29536|c1_g1_i1	411.462	623.415	0.599433	0.396686	1.13521	No	PREDICTED: uncharacterized protein LOC105165646	Sesamum indicum	NA	NA	NA	NA	NA
TR2385|c0_g1_i1	576.476	873.528	0.599594	0.389611	1.14018	No	NA	NA	NA	NA	NA	NA	NA
TR43775|c1_g5_i1	107.152	162.387	0.599778	0.463931	1.12941	No	PREDICTED: ankyrin repeat domain-containing protein 50	Sesamum indicum	NA	NA	NA	NA	NA
TR39039|c0_g2_i2	173.586	263.178	0.600393	0.4374	1.12918	No	PREDICTED: transcription factor TCP10-like	Sesamum indicum	NA	NA	NA	NA	NA
TR24521|c0_g1_i1	57.8619	87.7261	0.600393	0.484217	1.12476	No	PREDICTED: uncharacterized protein LOC105166552	Sesamum indicum	NA	NA	NA	NA	NA
TR39442|c3_g6_i4	57.8619	87.7261	0.600393	0.484217	1.12471	No	PREDICTED: protein FAR-RED IMPAIRED RESPONSE 1 isoform X2	Sesamum indicum	NA	NA	NA	NA	NA
TR43663|c0_g1_i3	546.474	828.732	0.600754	0.389447	1.14007	No	PREDICTED: chaperone protein ClpB4, mitochondrial	Sesamum indicum	NA	NA	NA	NA	NA
TR31174|c0_g1_i1	447.894	679.411	0.601127	0.393121	1.13525	No	PREDICTED: protein NDR1-like	Sesamum indicum	NA	NA	NA	NA	NA
TR31737|c1_g3_i1	66.434	100.792	0.601382	0.480145	1.12787	No	hypothetical protein CISIN_1g022966mg	Citrus sinensis	NA	transport[GO:0006810]	transporter activity[GO:0005215]	integral component of membrane[GO:0016021]	NA
TR35893|c1_g1_i4	66.434	100.792	0.601382	0.480145	1.12752	No	PREDICTED: probable xyloglucan endotransglucosylase/hydrolase protein 8	Sesamum indicum	NA	NA	NA	NA	NA
TR43188|c0_g4_i4	282.88	429.298	0.601787	0.40789	1.12409	No	NA	NA	NA	NA	NA	NA	NA
TR2945|c0_g3_i1	75.0062	113.857	0.602146	0.475813	1.12539	No	PREDICTED: uncharacterized protein LOC105156092	Sesamum indicum	NA	NA	NA	NA	NA
TR42326|c0_g1_i11	75.0062	113.857	0.602146	0.475813	1.1252	No	hypothetical protein MIMGU_mgv1a001164mg	Mimulus guttatus	NA	ion transmembrane transport[GO:0034220] ; potassium ion transport[GO:0006813]	ion channel activity[GO:0005216]	membrane[GO:0016020]	NA
TR42226|c1_g1_i2	158.584	240.78	0.602465	0.441214	1.13177	No	hypothetical protein MIMGU_mgv1a0187412mg, partial	Mimulus guttatus	NA	protein phosphorylation[GO:0006468]	ATP binding[GO:0005524] ; protein serine/threonine kinase activity[GO:0004674]	integral component of membrane[GO:0016021]	NA
TR32983|c1_g1_i3	83.5783	126.923	0.602752	0.471832	1.12552	No	hypothetical protein AMTR_s00004p00175690	Amborella trichopoda	NA	metabolic process[GO:0008152]	hydrolase activity[GO:0016787]	NA	NA
TR38911|c2_g1_i6	267.879	406.9	0.603091	0.409163	1.12435	No	hypothetical protein MIMGU_mgv1a003577mg	Mimulus guttatus	NA	NA	NA	NA	NA
TR35457|c0_g2_i8	302.168	459.162	0.603654	0.403747	1.12828	No	PREDICTED: uncharacterized protein LOC105163765 isoform X2	Sesamum indicum	NA	NA	NA	NA	NA
TR41396|c0_g1_i2	109.295	166.12	0.603999	0.459709	1.13251	No	PREDICTED: vegetative cell wall protein gp1-like	Sesamum indicum	NA	NA	NA	NA	NA
TR3896|c0_g1_i1	117.867	179.185	0.604294	0.455655	1.13153	No	hypothetical protein MIMGU_mgv1a015064mg	Mimulus guttatus	NA	NA	NA	NA	NA
TR38261|c0_g2_i3	996.511	1515.61	0.60494	0.386137	1.13816	No	PREDICTED: probable trehalase	Erythranthe guttatus	NA	NA	NA	NA	NA
TR32164|c0_g1_i4	1219.39	1855.31	0.605508	0.389161	1.13992	No	PREDICTED: aldo-keto reductase	Sesamum indicum	NA	NA	NA	NA	NA
TR41894|c0_g3_i1	572.19	871.662	0.607274	0.383647	1.13941	No	PREDICTED: uncharacterized protein LOC105158481 isoform X1	Sesamum indicum	NA	NA	NA	NA	NA
TR38886|c0_g2_i3	368.602	561.82	0.608046	0.393156	1.13487	No	NA	NA	NA	NA	NA	NA	NA
TR31635|c0_g1_i1	128.582	195.984	0.608046	0.448156	1.13218	No	PREDICTED: ubiquitin carboxyl-terminal hydrolase 24	Sesamum indicum	NA	NA	NA	NA	NA
TR34462|c1_g5_i1	25.7164	39.1968	0.608046	0.453531	1.13362	No	hypothetical protein MIMGU_mgv1a005136mg	Mimulus guttatus	NA	G-protein coupled receptor signaling pathway[GO:0007186] ; metabolic process[GO:0008152]	guanyl nucleotide binding[GO:0019001] ; G-protein beta/gamma-subunit complex binding[GO:0031683] ; signal transducer activity[GO:0004871] ; GTPase activity[GO:0003924]	NA	NA
TR41852|c1_g8_i3	25.7164	39.1968	0.608046	0.453531	1.1334	No	NA	NA	NA	NA	NA	NA	NA
TR445|c0_g2_i1	25.7164	39.1968	0.608046	0.453531	1.13346	No	hypothetical protein CISIN_1g007627mg	Citrus sinensis	NA	oxidation-reduction process[GO:0055114]	oxidoreductase activity, acting on the aldehyde or oxo group of donors, NAD or NADP as acceptor[GO:0016620]	NA	NA
TR32195|c0_g3_i2	25.7164	39.1968	0.608046	0.453531	1.13351	No	PREDICTED: uncharacterized protein LOC105176382	Sesamum indicum	NA	NA	NA	NA	NA
TR37024|c0_g3_i1	25.7164	39.1968	0.608046	0.453531	1.13356	No	PREDICTED: uncharacterized protein LOC105160014	Sesamum indicum	NA	NA	NA	NA	NA
TR41710|c0_g1_i4	25.7164	39.1968	0.608046	0.453531	1.13372	No	NA	NA	NA	NA	NA	NA	NA
TR34382|c0_g1_i1	25.7164	39.1968	0.608046	0.453531	1.13399	No	NA	NA	NA	NA	NA	NA	NA
TR3932|c1_g1_i7	102.866	156.787	0.608046	0.459515	1.13225	No	TPA_inf: L18 ribosomal protein Heart Stopper	Erythranthe nasuta	NA	NA	NA	NA	NA
TR33081|c0_g1_i5	85.7213	130.656	0.608046	0.466985	1.12818	No	NA	NA	NA	NA	NA	NA	NA
TR3580|c1_g1_i2	85.7213	130.656	0.608046	0.466985	1.12833	No	PREDICTED: cytochrome b-c1 complex subunit 6	Sesamum indicum	NA	NA	NA	NA	NA
TR3071|c0_g7_i1	77.1492	117.59	0.608046	0.470429	1.12583	No	NA	NA	NA	NA	NA	NA	NA
TR43749|c1_g1_i1	77.1492	117.59	0.608046	0.470429	1.12573	No	unnamed protein product	Coffea canephora	NA	regulation of photoperiodism, flowering[GO:2000028]	NA	NA	NA
TR35978|c2_g3_i1	42.8607	65.328	0.608046	0.478967	1.12738	No	PREDICTED: PRA1 family protein B3	Sesamum indicum	NA	NA	NA	NA	NA
TR41745|c1_g1_i3	42.8607	65.328	0.608046	0.478967	1.12733	No	PREDICTED: RNA-binding protein 39 isoform X2	Sesamum indicum	NA	NA	NA	NA	NA
TR32257|c2_g1_i3	42.8607	65.328	0.608046	0.478967	1.12728	No	hypothetical protein MIMGU_mgv1a0066982mg, partial	Mimulus guttatus	NA	NA	NA	integral component of membrane[GO:0016021]	NA
TR35072|c0_g2_i6	42.8607	65.328	0.608046	0.478967	1.12743	No	PREDICTED: uncharacterized protein LOC106417200	Brassica napus	NA	NA	NA	NA	NA
TR42067|c3_g1_i2	42.8607	65.328	0.608046	0.478967	1.12683	No	NA	NA	NA	NA	NA	NA	NA
TR42226|c1_g1_i8	42.8607	65.328	0.608046	0.478967	1.12708	No	NA	NA	NA	NA	NA	NA	NA
TR43119|c0_g5_i3	42.8607	65.328	0.608046	0.478967	1.12718	No	PREDICTED: membrane-bound transcription factor site-2 protease	Sesamum indicum	NA	NA	NA	NA	NA
TR29052|c0_g9_i1	51.4328	78.3935	0.608046	0.479954	1.12772	No	PREDICTED: pyruvate dehydrogenase E1 component subunit beta, mitochondrial	Vigna radiata var. radiata	NA	NA	NA	NA	NA
TR42104|c0_g2_i2	51.4328	78.3935	0.608046	0.479954	1.12792	No	NA	NA	NA	NA	NA	NA	NA
TR42385|c0_g6_i1	51.4328	78.3935	0.608046	0.479954	1.12767	No	hypothetical protein M569_14341, partial	Genlisea aurea	NA	protein phosphorylation[GO:0006468]	ATP binding[GO:0005524] ; protein serine/threonine kinase activity[GO:0004674]	NA	NA
TR36946|c0_g2_i1	51.4328	78.3935	0.608046	0.479954	1.12787	No	PREDICTED: cell division cycle 20.1, cofactor of APC complex-like	Malus domestica	NA	NA	NA	NA	NA
TR3626|c0_g2_i1	51.4328	78.3935	0.608046	0.479954	1.12777	No	NA	NA	NA	NA	NA	NA	NA
TR2095|c0_g1_i1	17.1443	26.1312	0.608046	0.391904	1.13609	No	PREDICTED: ABC transporter E family member 2	Sesamum indicum	NA	NA	NA	NA	NA
TR25285|c0_g1_i1	17.1443	26.1312	0.608046	0.391904	1.13683	No	PREDICTED: probable LRR receptor-like serine/threonine-protein kinase At1g63430	Sesamum indicum	NA	NA	NA	NA	NA
TR34949|c1_g3_i1	17.1443	26.1312	0.608046	0.391904	1.1367	No	NA	NA	NA	NA	NA	NA	NA
TR36817|c0_g3_i2	17.1443	26.1312	0.608046	0.391904	1.13597	No	PREDICTED: protein XRI1-like	Sesamum indicum	NA	NA	NA	NA	NA
TR44176|c2_g2_i1	17.1443	26.1312	0.608046	0.391904	1.1364	No	PREDICTED: receptor-like protein kinase THESEUS 1, partial	Erythranthe guttatus	NA	NA	NA	NA	NA
TR44557|c3_g2_i4	17.1443	26.1312	0.608046	0.391904	1.13744	No	PREDICTED: leishmanolysin-like peptidase	Vitis vinifera	NA	cell adhesion[GO:0007155] ; proteolysis[GO:0006508]	metalloendopeptidase activity[GO:0004222]	membrane[GO:0016020]	NA
TR33728|c1_g1_i3	17.1443	26.1312	0.608046	0.391904	1.13541	No	NA	NA	NA	NA	NA	NA	NA
TR35418|c3_g2_i3	17.1443	26.1312	0.608046	0.391904	1.13677	No	hypothetical protein MIMGU_mgv1a007584mg	Mimulus guttatus	NA	NA	NA	NA	NA
TR37260|c4_g1_i1	17.1443	26.1312	0.608046	0.391904	1.13504	No	Dual specificity protein phosphatase, putative	Ricinus communis	NA	peptidyl-tyrosine dephosphorylation[GO:0035335]	protein tyrosine phosphatase activity[GO:0004725] ; protein tyrosine/serine/threonine phosphatase activity[GO:0008138]	NA	NA
TR37719|c0_g2_i1	17.1443	26.1312	0.608046	0.391904	1.13664	No	PREDICTED: protein CHROMATIN REMODELING 19 isoform X1	Sesamum indicum	NA	NA	NA	NA	NA
TR40080|c0_g6_i2	17.1443	26.1312	0.608046	0.391904	1.13646	No	NA	NA	NA	NA	NA	NA	NA
TR40302|c5_g4_i1	17.1443	26.1312	0.608046	0.391904	1.13652	No	PREDICTED: bifunctional epoxide hydrolase 2-like	Sesamum indicum	NA	NA	NA	NA	NA
TR44779|c2_g3_i1	17.1443	26.1312	0.608046	0.391904	1.13695	No	NA	NA	NA	NA	NA	NA	NA
TR14190|c1_g1_i1	17.1443	26.1312	0.608046	0.391904	1.13701	No	NA	NA	NA	NA	NA	NA	NA
TR30830|c0_g2_i1	17.1443	26.1312	0.608046	0.391904	1.13707	No	hypothetical protein MIMGU_mgv1a000651mg	Mimulus guttatus	NA	proteolysis[GO:0006508]	metal ion binding[GO:0046872] ; metalloendopeptidase activity[GO:0004222]	NA	NA
TR35364|c1_g1_i1	17.1443	26.1312	0.608046	0.391904	1.13738	No	PREDICTED: ankyrin-1	Sesamum indicum	NA	NA	NA	NA	NA
TR37189|c2_g1_i1	17.1443	26.1312	0.608046	0.391904	1.13732	No	PREDICTED: peroxisome biogenesis protein 22-like isoform X2	Glycine max	NA	NA	NA	NA	NA
TR38006|c0_g4_i2	17.1443	26.1312	0.608046	0.391904	1.1372	No	PREDICTED: pre-mRNA cleavage factor Im 25 kDa subunit 1	Sesamum indicum	NA	NA	NA	NA	NA
TR41964|c0_g7_i9	17.1443	26.1312	0.608046	0.391904	1.13658	No	PREDICTED: uncharacterized protein LOC103984680	Musa acuminata subsp. malaccensis	NA	cell redox homeostasis[GO:0045454] ; glycerol ether metabolic process[GO:0006662] ; photosystem II assembly[GO:0010207] ; oxidation-reduction process[GO:0055114]	protein disulfide oxidoreductase activity[GO:0015035]	plastid[GO:0009536]	NA
TR43423|c0_g10_i2	17.1443	26.1312	0.608046	0.391904	1.13713	No	NA	NA	NA	NA	NA	NA	NA
TR34376|c0_g2_i1	214.303	326.64	0.608046	0.417668	1.1305	No	PREDICTED: protein PAT1 homolog 1-like	Sesamum indicum	NA	NA	NA	NA	NA
TR41154|c0_g1_i4	188.587	287.443	0.608046	0.426003	1.13403	No	NA	NA	NA	NA	NA	NA	NA
TR34899|c0_g1_i5	137.154	209.049	0.608046	0.444688	1.13169	No	hypothetical protein MIMGU_mgv1a006331mg	Mimulus guttatus	NA	metabolic process[GO:0008152]	zinc ion binding[GO:0008270] ; protein-cysteine S-palmitoyltransferase activity[GO:0019706]	integral component of membrane[GO:0016021]	NA
TR2465|c0_g1_i2	120.01	182.918	0.608046	0.451818	1.13192	No	NA	NA	NA	NA	NA	NA	NA
TR40086|c0_g5_i1	111.438	169.853	0.608046	0.455628	1.13162	No	PREDICTED: ribulose-1,5 bisphosphate carboxylase/oxygenase large subunit N-methyltransferase, chloroplastic isoform X2	Sesamum indicum	NA	NA	NA	NA	NA
TR33175|c0_g2_i2	111.438	169.853	0.608046	0.455628	1.13157	No	PREDICTED: 1-aminocyclopropane-1-carboxylate oxidase 1	Sesamum indicum	NA	NA	NA	NA	NA
TR31646|c1_g1_i4	94.2935	143.722	0.608046	0.463362	1.12957	No	NA	NA	NA	NA	NA	NA	NA
TR36554|c1_g1_i2	94.2935	143.722	0.608046	0.463362	1.12951	No	NA	NA	NA	NA	NA	NA	NA
TR34367|c0_g2_i3	34.2885	52.2624	0.608046	0.473892	1.12472	No	PREDICTED: serine carboxypeptidase-like 34	Sesamum indicum	NA	NA	NA	NA	NA
TR35335|c1_g1_i3	34.2885	52.2624	0.608046	0.473892	1.12458	No	PREDICTED: proteasome subunit beta type-5-like	Nicotiana tomentosiformis	NA	NA	NA	NA	NA
TR42985|c0_g1_i1	34.2885	52.2624	0.608046	0.473892	1.12477	No	unknown	Lotus japonicus	NA	nucleoside metabolic process[GO:0009116]	transferase activity[GO:0016740]	NA	NA
TR43937|c2_g1_i1	34.2885	52.2624	0.608046	0.473892	1.12497	No	PREDICTED: uncharacterized protein LOC105179373	Sesamum indicum	NA	NA	NA	NA	NA
TR24974|c0_g1_i1	34.2885	52.2624	0.608046	0.473892	1.12537	No	NA	NA	NA	NA	NA	NA	NA
TR28956|c0_g1_i3	34.2885	52.2624	0.608046	0.473892	1.12532	No	PREDICTED: cation-chloride cotransporter 1	Sesamum indicum	NA	NA	NA	NA	NA
TR35377|c1_g3_i4	34.2885	52.2624	0.608046	0.473892	1.12527	No	hypothetical protein PRUPE_ppa025582mg	Prunus persica	NA	embryo development[GO:0009790] ; methylglyoxal catabolic process to D-lactate via S-lactoyl-glutathione[GO:0019243] ; oxidation-reduction process[GO:0055114]	oxidoreductase activity[GO:0016491]	protein complex[GO:0043234] ; mitochondrial inner membrane[GO:0005743] ; integral component of membrane[GO:0016021]	NA
TR37743|c0_g1_i1	34.2885	52.2624	0.608046	0.473892	1.12512	No	PREDICTED: myb-like protein K	Erythranthe guttatus	NA	NA	NA	NA	NA
TR23567|c0_g1_i1	34.2885	52.2624	0.608046	0.473892	1.12487	No	unnamed protein product	Coffea canephora	NA	NA	NA	NA	NA
TR31264|c0_g3_i1	34.2885	52.2624	0.608046	0.473892	1.12502	No	thaumatin like protein	Beta vulgaris	NA	NA	NA	NA	NA
TR3617|c0_g3_i1	68.5771	104.525	0.608046	0.474181	1.12397	No	PREDICTED: peroxiredoxin-2E-1, chloroplastic	Sesamum indicum	NA	NA	NA	NA	NA
TR37272|c1_g1_i2	68.5771	104.525	0.608046	0.474181	1.12426	No	hypothetical protein MIMGU_mgv1a018792mg	Mimulus guttatus	NA	protein methylation[GO:0006479]	nucleic acid binding[GO:0003676] ; protein methyltransferase activity[GO:0008276]	NA	NA
TR36966|c0_g1_i3	68.5771	104.525	0.608046	0.474181	1.12411	No	PREDICTED: uncharacterized protein ycf45 isoform X2	Erythranthe guttatus	NA	NA	NA	NA	NA
TR39997|c3_g4_i9	68.5771	104.525	0.608046	0.474181	1.12421	No	PREDICTED: cytochrome P450 76A1	Erythranthe guttatus	NA	NA	NA	NA	NA
TR8275|c0_g1_i1	60.0049	91.4591	0.608046	0.477729	1.12639	No	PREDICTED: dicer-like protein 4 isoform X2	Erythranthe guttatus	NA	NA	NA	NA	NA
TR28923|c0_g1_i2	670.769	1022.85	0.608704	0.381079	1.13714	No	hypothetical protein MIMGU_mgv1a016040mg	Mimulus guttatus	NA	NA	nucleic acid binding[GO:0003676] ; nucleotide binding[GO:0000166]	NA	NA
TR32120|c0_g1_i4	362.173	552.488	0.609265	0.392766	1.13509	No	PREDICTED: protein MEMO1 isoform X1	Sesamum indicum	NA	NA	NA	NA	NA
TR21410|c0_g1_i1	353.601	539.422	0.609295	0.39354	1.1353	No	hypothetical protein ZEAMMB73_095591	Zea mays	NA	NA	ATP binding[GO:0005524]	NA	NA
TR44032|c0_g2_i2	953.65	1455.88	0.61036	0.381367	1.13781	No	PREDICTED: uncharacterized protein LOC105175953	Sesamum indicum	NA	NA	NA	NA	NA
TR3786|c0_g1_i4	330.027	503.959	0.61072	0.394829	1.13584	No	PREDICTED: nucleolin 1-like	Sesamum indicum	NA	NA	NA	NA	NA
TR33096|c0_g2_i1	287.166	438.631	0.611119	0.399885	1.13448	No	NA	NA	NA	NA	NA	NA	NA
TR41893|c0_g2_i1	139.297	212.782	0.611213	0.441402	1.1296	No	hypothetical protein MIMGU_mgv1a004726mg	Mimulus guttatus	NA	response to stress[GO:0006950] ; regulation of transcription, DNA-templated[GO:0006355]	lipid binding[GO:0008289]	integral component of membrane[GO:0016021]	NA
TR2792|c1_g1_i2	139.297	212.782	0.611213	0.441402	1.12955	No	PREDICTED: uncharacterized protein LOC105170296	Sesamum indicum	NA	NA	NA	NA	NA
TR44056|c0_g1_i3	130.725	199.717	0.611421	0.444662	1.13167	No	PREDICTED: uncharacterized protein LOC105175394	Sesamum indicum	NA	NA	NA	NA	NA
TR31148|c0_g1_i4	235.734	360.237	0.611789	0.408878	1.12472	No	PREDICTED: alpha-L-arabinofuranosidase 1-like	Sesamum indicum	NA	NA	NA	NA	NA
TR16422|c1_g1_i2	1161.52	1775.05	0.611844	0.383337	1.13912	No	PREDICTED: putative late blight resistance protein homolog R1A-10	Sesamum indicum	NA	NA	NA	NA	NA
TR39138|c1_g3_i2	2863.09	4376.97	0.612359	0.415204	1.12988	No	PREDICTED: ABC transporter F family member 5-like	Sesamum indicum	NA	NA	NA	NA	NA
TR36131|c0_g4_i2	201.445	307.975	0.612425	0.418212	1.13117	No	PREDICTED: ubiquitin-conjugating enzyme E2 28-like	Sesamum indicum	NA	NA	NA	NA	NA
TR38716|c0_g1_i6	96.4365	147.455	0.612619	0.458935	1.13175	No	NA	NA	NA	NA	NA	NA	NA
TR43836|c1_g2_i3	96.4365	147.455	0.612619	0.458935	1.1317	No	PREDICTED: serine/threonine-protein phosphatase 6 regulatory subunit 3	Sesamum indicum	NA	NA	NA	NA	NA
TR29487|c0_g1_i1	87.8644	134.389	0.613064	0.46232	1.13042	No	PREDICTED: uncharacterized protein LOC105157329 isoform X2	Sesamum indicum	NA	NA	NA	NA	NA
TR42846|c0_g1_i6	87.8644	134.389	0.613064	0.46232	1.13068	No	NA	NA	NA	NA	NA	NA	NA
TR2542|c1_g1_i1	87.8644	134.389	0.613064	0.46232	1.13047	No	PREDICTED: flavonol synthase/flavanone 3-hydroxylase	Sesamum indicum	NA	NA	NA	NA	NA
TR32936|c2_g3_i5	87.8644	134.389	0.613064	0.46232	1.13063	No	NA	NA	NA	NA	NA	NA	NA
TR38900|c0_g1_i4	510.042	780.202	0.613233	0.380794	1.13667	No	2-oxoglutarate/malate translocator	Medicago truncatula	NA	sodium ion transport[GO:0006814] ; transmembrane transport[GO:0055085]	transporter activity[GO:0005215]	integral component of membrane[GO:0016021]	NA
TR2732|c2_g4_i1	167.157	255.712	0.613321	0.429587	1.12788	No	PREDICTED: uncharacterized protein LOC105158935	Sesamum indicum	NA	NA	NA	NA	NA
TR41009|c0_g4_i10	396.461	606.617	0.613606	0.386543	1.13829	No	NA	NA	NA	NA	NA	NA	NA
TR17405|c0_g1_i1	79.2922	121.323	0.613606	0.465343	1.12946	No	hypothetical protein GLYMA_08G2649001	Glycine max	NA	phosphorelay signal transduction system[GO:0000160] ; signal transduction by protein phosphorylation[GO:0023014]	phosphorelay sensor kinase activity[GO:0000155]	intracellular[GO:0005622]	NA
TR41944|c0_g1_i4	79.2922	121.323	0.613606	0.465343	1.12951	No	hypothetical protein MIMGU_mgv1a008409mg	Mimulus guttatus	NA	oxidation-reduction process[GO:0055114]	oxidoreductase activity[GO:0016491] ; iron ion binding[GO:0005506]	NA	NA
TR36728|c0_g6_i2	450.037	688.743	0.613923	0.382914	1.13881	No	hypothetical protein MIMGU_mgv1a010637mg	Mimulus guttatus	NA	regulation of transcription, DNA-templated[GO:0006355]	protein dimerization activity[GO:0046983] ; transcription factor activity, sequence-specific DNA binding[GO:0003700]	nucleus[GO:0005634]	NA
TR40211|c1_g5_i5	141.44	216.516	0.614278	0.438213	1.12965	No	PREDICTED: actin-related protein 9	Sesamum indicum	NA	NA	NA	NA	NA
TR25545|c0_g1_i2	70.7201	108.258	0.614278	0.46855	1.12688	No	PREDICTED: uncharacterized protein LOC105168457	Sesamum indicum	NA	NA	NA	NA	NA
TR3529|c2_g1_i9	70.7201	108.258	0.614278	0.46855	1.12693	No	PREDICTED: LOW QUALITY PROTEIN: uncharacterized protein LOC105177507	Sesamum indicum	NA	NA	NA	NA	NA
TR33421|c0_g4_i1	70.7201	108.258	0.614278	0.46855	1.12683	No	NA	NA	NA	NA	NA	NA	NA
TR34953|c0_g1_i1	690.057	1056.45	0.614433	0.376506	1.13667	No	PREDICTED: lysosomal Pro-X carboxypeptidase	Sesamum indicum	NA	NA	NA	NA	NA
TR26447|c0_g1_i1	132.868	203.45	0.614679	0.441274	1.13149	No	PREDICTED: sulfite reductase 1 [ferredoxin], chloroplastic-like	Sesamum indicum	NA	NA	NA	NA	NA
TR35780|c2_g3_i3	132.868	203.45	0.614679	0.441274	1.13139	No	proteasome subunit alpha type-6	Genlisea aurea	NA	ubiquitin-dependent protein catabolic process[GO:0006511]	threonine-type endopeptidase activity[GO:0004298]	cytoplasm[GO:0005737] ; proteasome core complex, alpha-subunit complex[GO:0019773] ; nucleus[GO:0005634]	NA
TR32604|c1_g1_i1	692.2	1060.18	0.615048	0.376019	1.1361	No	PREDICTED: protein notum homolog isoform X2	Sesamum indicum	NA	NA	NA	NA	NA
TR31636|c0_g6_i2	310.74	475.961	0.615136	0.393604	1.1353	No	PREDICTED: magnesium-dependent phosphatase 1-like	Sesamum indicum	NA	NA	NA	NA	NA
TR39964|c0_g4_i6	186.444	285.576	0.615136	0.421175	1.13193	No	NA	NA	NA	NA	NA	NA	NA
TR33991|c1_g4_i5	62.148	95.1922	0.615136	0.471605	1.12578	No	unknown	Lotus japonicus	NA	oxidation-reduction process[GO:0055114]	oxidoreductase activity[GO:0016491]	NA	NA
TR38523|c0_g4_i1	62.148	95.1922	0.615136	0.471605	1.12573	No	PREDICTED: uncharacterized protein LOC105167945	Sesamum indicum	NA	NA	NA	NA	NA
TR3956|c0_g4_i5	6508.39	9969.05	0.615154	0.462205	1.13071	No	PREDICTED: plastocyanin-like	Sesamum indicum	NA	NA	NA	NA	NA
TR41683|c1_g1_i1	115.724	177.319	0.615659	0.447867	1.13203	No	4-coumarate: CoA ligase	Scutellaria baicalensis	Lamiaceae	metabolic process[GO:0008152]	ligase activity[GO:0016874]	NA	NA
TR42913|c1_g4_i2	107.152	164.253	0.616267	0.451289	1.13155	No	PREDICTED: 6-phosphofructo-2-kinase/fructose-2,6-bisphosphatase	Sesamum indicum	NA	NA	NA	NA	NA
TR22259|c0_g1_i2	53.5758	82.1266	0.616267	0.473511	1.12527	No	PREDICTED: uncharacterized protein LOC105952207 isoform X1	Erythranthe guttatus	NA	NA	NA	NA	NA
TR43110|c0_g1_i2	53.5758	82.1266	0.616267	0.473511	1.12537	No	NA	NA	NA	NA	NA	NA	NA
TR8112|c0_g2_i1	53.5758	82.1266	0.616267	0.473511	1.12532	No	PREDICTED: UDP-glucuronate 4-epimerase 3-like	Sesamum indicum	NA	NA	NA	NA	NA
TR30660|c0_g1_i2	53.5758	82.1266	0.616267	0.473511	1.12542	No	hypothetical protein MIMGU_mgv1a015517mg	Mimulus guttatus	NA	NA	NA	NA	NA
TR31131|c0_g1_i4	53.5758	82.1266	0.616267	0.473511	1.12497	No	PREDICTED: uncharacterized protein LOC105161139	Sesamum indicum	NA	NA	NA	NA	NA
TR42194|c0_g1_i9	205.731	315.441	0.616608	0.413544	1.12702	No	PREDICTED: dicarboxylate transporter 2.1, chloroplastic-like	Sesamum indicum	NA	NA	NA	NA	NA
TR38477|c1_g1_i5	98.5795	151.188	0.616979	0.454664	1.13391	No	PREDICTED: WD repeat-containing protein 61	Sesamum indicum	NA	NA	NA	NA	NA
TR31882|c0_g1_i1	242.163	371.436	0.617137	0.40314	1.13226	No	PREDICTED: phospholipase D delta	Sesamum indicum	NA	NA	NA	NA	NA
TR33465|c2_g1_i1	143.583	220.249	0.617245	0.435119	1.12879	No	PREDICTED: uncharacterized protein LOC105164965	Sesamum indicum	NA	NA	NA	NA	NA
TR33100|c0_g1_i8	377.174	578.619	0.617384	0.385096	1.13835	No	NA	NA	NA	NA	NA	NA	NA
TR35364|c1_g4_i1	188.587	289.31	0.617384	0.418663	1.1309	No	NA	NA	NA	NA	NA	NA	NA
TR2858|c0_g3_i1	90.0074	138.122	0.617827	0.457826	1.131	No	MYB-related transcription factor	Salvia miltiorrhiza	NA	NA	NA	NA	NA
TR8071|c1_g2_i1	90.0074	138.122	0.617827	0.457826	1.13079	No	PREDICTED: dolichyl-diphosphooligosaccharide--protein glycosyltransferase 48 kDa subunit-like	Sesamum indicum	NA	NA	NA	NA	NA
TR40244|c1_g1_i4	90.0074	138.122	0.617827	0.457826	1.13084	No	NA	NA	NA	NA	NA	NA	NA
TR33586|c0_g1_i8	45.0037	69.061	0.617827	0.472277	1.12568	No	hypothetical protein MIMGU_mgv1a009481mg	Mimulus guttatus	NA	metabolic process[GO:0008152]	hydrolase activity[GO:0016787]	NA	NA
TR39514|c2_g9_i5	45.0037	69.061	0.617827	0.472277	1.12503	No	PREDICTED: kinesin-like protein KIN12B	Sesamum indicum	NA	NA	NA	NA	NA
TR41329|c0_g1_i3	45.0037	69.061	0.617827	0.472277	1.12543	No	NA	NA	NA	NA	NA	NA	NA
TR32117|c0_g2_i1	45.0037	69.061	0.617827	0.472277	1.12558	No	NA	NA	NA	NA	NA	NA	NA
TR3252|c0_g1_i4	45.0037	69.061	0.617827	0.472277	1.12573	No	PREDICTED: U-box domain-containing protein 40-like	Sesamum indicum	NA	NA	NA	NA	NA
TR35123|c1_g2_i1	45.0037	69.061	0.617827	0.472277	1.12498	No	hypothetical protein MIMGU_mgv1a009467mg	Mimulus guttatus	NA	NA	NA	membrane[GO:0016020]	NA
TR37008|c0_g2_i2	45.0037	69.061	0.617827	0.472277	1.12588	No	PREDICTED: aspartic proteinase-like protein 1	Sesamum indicum	NA	NA	NA	NA	NA
TR38535|c1_g5_i3	45.0037	69.061	0.617827	0.472277	1.12578	No	hypothetical protein MIMGU_mgv1a008441mg	Mimulus guttatus	NA	L-methionine biosynthetic process from methylthioadenosine[GO:0019509] ; L-methionine biosynthetic process from S-adenosylmethionine[GO:0019284]	S-methyl-5-thioribose-1-phosphate isomerase activity[GO:0046523]	cytoplasm[GO:0005737] ; nucleus[GO:0005634]	map00270:Cysteine and methionine metabolism(isomerase[ec:5.3.1.23])
TR38753|c0_g4_i1	45.0037	69.061	0.617827	0.472277	1.12583	No	PREDICTED: uncharacterized protein LOC105967360	Erythranthe guttatus	NA	NA	NA	NA	NA
TR43623|c1_g1_i4	45.0037	69.061	0.617827	0.472277	1.12593	No	NA	NA	NA	NA	NA	NA	NA
TR3634|c2_g4_i1	6589.83	10114.6	0.618131	0.461031	1.13036	No	vanillin synthase	Glechoma hederacea	Lamiaceae	proteolysis[GO:0006508]	cysteine-type peptidase activity[GO:0008234]	NA	NA
TR43848|c1_g1_i1	1056.52	1622	0.61846	0.37663	1.13685	No	hypothetical protein CISIN_1g0038272mg, partial	Citrus sinensis	NA	protein folding[GO:0006457] ; response to stress[GO:0006950]	ATP binding[GO:0005524] ; unfolded protein binding[GO:0051082]	NA	NA
TR35362|c0_g6_i7	126.439	194.117	0.618488	0.441022	1.13171	No	PREDICTED: vacuolar protein sorting-associated protein 29-like	Solanum tuberosum	NA	vesicle-mediated transport[GO:0016192] ; ubiquitin-dependent protein catabolic process[GO:0006511] ; protein targeting to vacuole[GO:0006623] ; response to misfolded protein[GO:0051788] ; proteasome core complex assembly[GO:0080129] ; endosomal transport[GO:0016197] ; receptor recycling[GO:0001881] ; photorespiration[GO:0009853]	NA	retromer complex[GO:0030904] ; multivesicular body[GO:0005771]	NA
TR22115|c0_g1_i1	244.306	375.169	0.618853	0.401309	1.13199	No	PREDICTED: uncharacterized protein LOC105158035	Sesamum indicum	NA	NA	NA	NA	NA
TR41726|c0_g2_i4	81.4353	125.056	0.618853	0.460538	1.13045	No	NA	NA	NA	NA	NA	NA	NA
TR43692|c1_g5_i4	235.734	362.104	0.619244	0.403012	1.13243	No	PREDICTED: zinc finger BED domain-containing protein RICESLEEPER 2-like	Brassica napus	NA	NA	NA	NA	NA
TR34702|c0_g3_i4	117.867	181.052	0.619244	0.444174	1.1314	No	unknown	Lotus japonicus	NA	metabolic process[GO:0008152]	ATP binding[GO:0005524] ; ligase activity[GO:0016874]	NA	NA
TR33184|c0_g1_i2	72.8631	111.991	0.620119	0.463231	1.1295	No	PREDICTED: haloacid dehalogenase-like hydrolase domain-containing protein At4g39970	Sesamum indicum	NA	NA	NA	NA	NA
TR39188|c0_g3_i2	72.8631	111.991	0.620119	0.463231	1.12945	No	PREDICTED: BTB/POZ and TAZ domain-containing protein 3	Sesamum indicum	NA	NA	NA	NA	NA
TR38747|c0_g3_i1	72.8631	111.991	0.620119	0.463231	1.12955	No	PREDICTED: leucine-rich repeat extensin-like protein 4	Sesamum indicum	NA	NA	NA	NA	NA
TR44665|c1_g1_i5	72.8631	111.991	0.620119	0.463231	1.12935	No	hypothetical protein MIMGU_mgv1a025374mg	Mimulus guttatus	NA	NA	NA	NA	NA
TR40523|c0_g1_i1	36.4316	55.9954	0.620119	0.466957	1.12872	No	unnamed protein product	Coffea canephora	NA	oxidation-reduction process[GO:0055114]	oxidoreductase activity[GO:0016491] ; copper ion binding[GO:0005507]	NA	NA
TR42640|c0_g2_i3	36.4316	55.9954	0.620119	0.466957	1.12882	No	PREDICTED: protein NRT1/ PTR FAMILY 5.10-like	Sesamum indicum	NA	NA	NA	NA	NA
TR44632|c0_g2_i1	36.4316	55.9954	0.620119	0.466957	1.12847	No	PREDICTED: kinesin-like protein NACK1	Sesamum indicum	NA	NA	NA	NA	NA
TR33990|c0_g2_i1	36.4316	55.9954	0.620119	0.466957	1.12893	No	NA	NA	NA	NA	NA	NA	NA
TR38300|c0_g2_i4	36.4316	55.9954	0.620119	0.466957	1.12898	No	hypothetical protein MIMGU_mgv1a006057mg	Mimulus guttatus	NA	phosphorylation[GO:0016310]	protein kinase activity[GO:0004672] ; nucleotide binding[GO:0000166]	membrane[GO:0016020]	NA
TR42514|c1_g3_i6	36.4316	55.9954	0.620119	0.466957	1.12928	No	NA	NA	NA	NA	NA	NA	NA
TR35483|c0_g1_i1	36.4316	55.9954	0.620119	0.466957	1.12923	No	PREDICTED: high affinity nitrate transporter 2.5-like	Erythranthe guttatus	NA	NA	NA	NA	NA
TR36762|c0_g2_i1	36.4316	55.9954	0.620119	0.466957	1.12918	No	PREDICTED: WAT1-related protein At3g28050-like isoform X2	Sesamum indicum	NA	NA	NA	NA	NA
TR8183|c0_g4_i9	36.4316	55.9954	0.620119	0.466957	1.12877	No	hypothetical protein MIMGU_mgv1a004160mg	Mimulus guttatus	NA	NA	phosphatidylinositol binding[GO:0035091]	NA	NA
TR41229|c1_g1_i3	109.295	167.986	0.620119	0.44738	1.13203	No	PREDICTED: LOW QUALITY PROTEIN: protein transport protein SEC31 homolog B-like	Sesamum indicum	NA	NA	NA	NA	NA
TR43925|c0_g2_i3	109.295	167.986	0.620119	0.44738	1.13192	No	hypothetical protein MIMGU_mgv1a000437mg	Mimulus guttatus	NA	NA	NA	NA	NA
TR37841|c0_g6_i3	173.586	266.911	0.620713	0.421465	1.13202	No	PREDICTED: probable WRKY transcription factor 40	Sesamum indicum	NA	NA	NA	NA	NA
TR28274|c0_g1_i1	137.154	210.916	0.62087	0.434805	1.12885	No	PREDICTED: CBL-interacting serine/threonine-protein kinase 20	Sesamum indicum	NA	NA	NA	NA	NA
TR43048|c0_g1_i2	100.723	154.921	0.621142	0.450539	1.13126	No	PREDICTED: long-chain-alcohol oxidase FAO2	Sesamum indicum	NA	NA	NA	NA	NA
TR38856|c0_g1_i1	165.014	253.846	0.621367	0.424129	1.13355	No	NA	NA	NA	NA	NA	NA	NA
TR29261|c0_g1_i1	2228.75	3428.78	0.621459	0.396283	1.13466	No	PREDICTED: tryptophan aminotransferase-related protein 4-like	Sesamum indicum	NA	NA	NA	NA	NA
TR2944|c1_g2_i3	64.291	98.9252	0.621721	0.465819	1.12954	No	PREDICTED: RNA polymerase II C-terminal domain phosphatase-like 2	Sesamum indicum	NA	NA	NA	NA	NA
TR40088|c0_g1_i6	64.291	98.9252	0.621721	0.465819	1.12944	No	PREDICTED: uncharacterized protein LOC105163859	Sesamum indicum	NA	NA	NA	NA	NA
TR32934|c0_g1_i4	64.291	98.9252	0.621721	0.465819	1.12959	No	hypothetical protein JCGZ_12969	Jatropha curcas	NA	NA	protein domain specific binding[GO:0019904]	NA	NA
TR40758|c1_g2_i1	64.291	98.9252	0.621721	0.465819	1.12964	No	NA	NA	NA	NA	NA	NA	NA
TR33586|c0_g1_i4	377.174	580.486	0.62203	0.38148	1.13764	No	PREDICTED: uncharacterized protein LOC105168449	Sesamum indicum	NA	NA	NA	NA	NA
TR42707|c0_g1_i2	690.057	1062.05	0.622059	0.370629	1.13544	No	PREDICTED: probable beta-D-xylosidase 6	Sesamum indicum	NA	NA	NA	NA	NA
TR32348|c0_g1_i1	1208.67	1860.91	0.62259	0.375966	1.13606	No	PREDICTED: protease Do-like 1, chloroplastic	Sesamum indicum	NA	NA	NA	NA	NA
TR3257|c0_g3_i5	203.588	313.574	0.623153	0.409107	1.1246	No	PREDICTED: uncharacterized protein LOC105175794	Sesamum indicum	NA	NA	NA	NA	NA
TR42190|c1_g4_i1	417.892	643.947	0.623813	0.377113	1.13748	No	hypothetical protein MIMGU_mgv1a003761mg	Mimulus guttatus	NA	pectin biosynthetic process[GO:0045489] ; cell wall organization[GO:0071555]	polygalacturonate 4-alpha-galacturonosyltransferase activity[GO:0047262]	Golgi membrane[GO:0000139] ; integral component of membrane[GO:0016021]	map00500:Starch and sucrose metabolism(4-alpha-galacturonosyltransferase[ec:2.4.1.43]) ; map00520:Amino sugar and nucleotide sugar metabolism(4-alpha-galacturonosyltransferase[ec:2.4.1.43])
TR2294|c0_g3_i2	278.594	429.298	0.623813	0.39122	1.13712	No	hypothetical protein MIMGU_mgv1a017013mg	Mimulus guttatus	NA	NA	NA	NA	NA
TR44365|c4_g6_i1	139.297	214.649	0.623813	0.431714	1.13025	No	PREDICTED: suppressor of RPS4-RLD 1	Sesamum indicum	NA	NA	NA	NA	NA
TR36530|c1_g1_i1	139.297	214.649	0.623813	0.431714	1.1303	No	NA	NA	NA	NA	NA	NA	NA
TR15317|c0_g1_i1	27.8594	42.9298	0.623813	0.449776	1.13077	No	BnaA01g31000D	Brassica napus	NA	vesicle-mediated transport[GO:0016192] ; intracellular protein transport[GO:0006886]	structural molecule activity[GO:0005198]	clathrin coat of coated pit[GO:0030132] ; clathrin coat of trans-Golgi network vesicle[GO:0030130]	NA
TR21614|c0_g1_i1	27.8594	42.9298	0.623813	0.449776	1.13093	No	PREDICTED: uncharacterized protein LOC105177625 isoform X2	Sesamum indicum	NA	NA	NA	NA	NA
TR32083|c0_g2_i1	27.8594	42.9298	0.623813	0.449776	1.13115	No	hypothetical protein MIMGU_mgv1a009853mg	Mimulus guttatus	NA	NA	NA	NA	NA
TR32401|c0_g3_i1	27.8594	42.9298	0.623813	0.449776	1.13125	No	hypothetical protein CISIN_1g0453204mg, partial	Citrus sinensis	NA	protein phosphorylation[GO:0006468]	protein kinase activity[GO:0004672] ; ATP binding[GO:0005524]	NA	NA
TR41175|c2_g1_i1	27.8594	42.9298	0.623813	0.449776	1.13141	No	hypothetical protein M569_01051, partial	Genlisea aurea	NA	NA	NA	NA	NA
TR41335|c2_g2_i1	27.8594	42.9298	0.623813	0.449776	1.13067	No	PREDICTED: probable leucine-rich repeat receptor-like protein kinase At1g35710	Sesamum indicum	NA	NA	NA	NA	NA
TR7432|c0_g1_i2	27.8594	42.9298	0.623813	0.449776	1.13162	No	PREDICTED: CUGBP Elav-like family member 3	Sesamum indicum	NA	NA	NA	NA	NA
TR8195|c1_g1_i1	27.8594	42.9298	0.623813	0.449776	1.13178	No	hypothetical protein MIMGU_mgv1a002468mg	Mimulus guttatus	NA	NA	NA	NA	NA
TR29856|c0_g1_i1	27.8594	42.9298	0.623813	0.449776	1.13194	No	PREDICTED: AP-2 complex subunit alpha-1-like	Nicotiana sylvestris	NA	NA	NA	NA	NA
TR32737|c5_g1_i3	27.8594	42.9298	0.623813	0.449776	1.13205	No	NA	NA	NA	NA	NA	NA	NA
TR36914|c1_g6_i7	27.8594	42.9298	0.623813	0.449776	1.132	No	NA	NA	NA	NA	NA	NA	NA
TR37451|c1_g4_i4	27.8594	42.9298	0.623813	0.449776	1.1321	No	NA	NA	NA	NA	NA	NA	NA
TR39852|c0_g3_i2	27.8594	42.9298	0.623813	0.449776	1.13146	No	PREDICTED: F-box/LRR-repeat protein 4	Sesamum indicum	NA	NA	NA	NA	NA
TR40955|c0_g1_i1	27.8594	42.9298	0.623813	0.449776	1.13061	No	hypothetical protein MIMGU_mgv1a020107mg	Mimulus guttatus	NA	protein phosphorylation[GO:0006468]	protein kinase activity[GO:0004672] ; calcium ion binding[GO:0005509] ; ATP binding[GO:0005524]	NA	NA
TR39390|c0_g4_i3	27.8594	42.9298	0.623813	0.449776	1.13184	No	PREDICTED: probable sugar phosphate/phosphate translocator At3g10290 isoform X2	Sesamum indicum	NA	NA	NA	NA	NA
TR31694|c1_g6_i7	83.5783	128.789	0.623813	0.455996	1.13143	No	PREDICTED: transcription factor bHLH148-like	Sesamum indicum	NA	NA	NA	NA	NA
TR41690|c0_g1_i5	83.5783	128.789	0.623813	0.455996	1.13138	No	PREDICTED: uncharacterized protein LOC104743381	Camelina sativa	NA	NA	NA	NA	NA
TR31885|c0_g1_i1	55.7189	85.8596	0.623813	0.467416	1.12815	No	PREDICTED: exocyst complex component EXO70B1	Sesamum indicum	NA	NA	NA	NA	NA
TR37730|c4_g3_i2	55.7189	85.8596	0.623813	0.467416	1.12825	No	PREDICTED: cysteine and histidine-rich domain-containing protein RAR1-like	Sesamum indicum	NA	NA	NA	NA	NA
TR22805|c0_g1_i1	660.054	1017.25	0.624017	0.369323	1.13972	No	hypothetical protein MIMGU_mgv1a017510mg	Mimulus guttatus	NA	NA	NA	NA	NA
TR27372|c0_g1_i2	587.191	905.259	0.6245	0.369952	1.13857	No	PREDICTED: uncharacterized protein LOC101214231	Cucumis sativus	NA	NA	NA	NA	NA
TR42527|c0_g1_i4	690.057	1063.91	0.624592	0.36869	1.1402	No	PREDICTED: non-lysosomal glucosylceramidase isoform X4	Sesamum indicum	NA	NA	NA	NA	NA
TR39599|c0_g1_i4	130.725	201.583	0.624841	0.434371	1.12904	No	PREDICTED: actin-related protein 3	Sesamum indicum	NA	NA	NA	NA	NA
TR43139|c1_g4_i6	439.322	677.544	0.625037	0.374868	1.1355	No	PREDICTED: amidase 1 isoform X1	Sesamum indicum	NA	NA	NA	NA	NA
TR48218|c0_g1_i1	102.866	158.654	0.62512	0.446554	1.13165	No	hypothetical protein	Beta vulgaris subsp. vulgaris	NA	NA	NA	NA	NA
TR7958|c0_g1_i1	655.768	1011.65	0.625452	0.368262	1.13986	No	PREDICTED: uncharacterized protein LOC105166943	Sesamum indicum	NA	NA	NA	NA	NA
TR30755|c0_g1_i3	150.012	231.448	0.625604	0.426369	1.13394	No	PREDICTED: LOW QUALITY PROTEIN: protein ALWAYS EARLY 3-like	Sesamum indicum	NA	NA	NA	NA	NA
TR38422|c0_g1_i2	150.012	231.448	0.625604	0.426369	1.13399	No	PREDICTED: uncharacterized protein LOC105173566	Sesamum indicum	NA	NA	NA	NA	NA
TR31146|c1_g1_i1	75.0062	115.724	0.625604	0.458203	1.13094	No	hypothetical protein MIMGU_mgv1a005482mg	Mimulus guttatus	NA	oxidation-reduction process[GO:0055114]	heme binding[GO:0020037] ; oxidoreductase activity, acting on paired donors, with incorporation or reduction of molecular oxygen[GO:0016705] ; monooxygenase activity[GO:0004497] ; iron ion binding[GO:0005506]	integral component of membrane[GO:0016021]	NA
TR30146|c2_g4_i9	75.0062	115.724	0.625604	0.458203	1.13099	No	PREDICTED: callose synthase 12	Sesamum indicum	NA	NA	NA	NA	NA
TR34996|c1_g3_i1	122.153	188.518	0.626013	0.437133	1.12964	No	PREDICTED: cytochrome b-c1 complex subunit Rieske-4, mitochondrial-like	Sesamum indicum	NA	NA	NA	NA	NA
TR36428|c1_g1_i2	122.153	188.518	0.626013	0.437133	1.12969	No	cytochrome P450 CYP72A330	Salvia miltiorrhiza	NA	oxidation-reduction process[GO:0055114]	heme binding[GO:0020037] ; oxidoreductase activity, acting on paired donors, with incorporation or reduction of molecular oxygen[GO:0016705] ; monooxygenase activity[GO:0004497] ; iron ion binding[GO:0005506]	NA	NA
TR39329|c4_g2_i3	94.2935	145.588	0.626662	0.449312	1.13221	No	PREDICTED: transcription factor TCP2	Nelumbo nucifera	NA	NA	NA	NA	NA
TR3704|c1_g2_i11	94.2935	145.588	0.626662	0.449312	1.13226	No	hypothetical protein MIMGU_mgv1a014597mg	Mimulus guttatus	NA	NA	NA	membrane[GO:0016020]	NA
TR32477|c0_g6_i1	47.1467	72.794	0.626662	0.466236	1.12968	No	PREDICTED: uncharacterized protein LOC105177601	Sesamum indicum	NA	NA	NA	NA	NA
TR33494|c0_g1_i4	47.1467	72.794	0.626662	0.466236	1.12937	No	UDP-glycosyltransferase 1	Linum usitatissimum	NA	NA	NA	NA	NA
TR36626|c0_g1_i4	47.1467	72.794	0.626662	0.466236	1.12983	No	hypothetical protein MIMGU_mgv1a015338mg	Mimulus guttatus	NA	NA	NA	membrane[GO:0016020]	NA
TR40369|c1_g5_i11	47.1467	72.794	0.626662	0.466236	1.12948	No	uncharacterized protein LOC105638142	Jatropha curcas	NA	lipid metabolic process[GO:0006629] ; oxidation-reduction process[GO:0055114]	oxidoreductase activity[GO:0016491]	integral component of membrane[GO:0016021]	NA
TR27543|c0_g1_i4	47.1467	72.794	0.626662	0.466236	1.12958	No	NA	NA	NA	NA	NA	NA	NA
TR30404|c0_g3_i2	1622.28	2504.86	0.626711	0.380504	1.13587	No	PREDICTED: uncharacterized protein LOC105176722	Sesamum indicum	NA	NA	NA	NA	NA
TR35072|c0_g2_i7	113.581	175.452	0.62736	0.439941	1.1316	No	PREDICTED: uncharacterized protein LOC103833330	Brassica rapa	NA	NA	NA	NA	NA
TR36437|c0_g12_i1	113.581	175.452	0.62736	0.439941	1.13165	No	hypothetical protein CICLE_v10012559mg	Citrus clementina	NA	proteolysis involved in cellular protein catabolic process[GO:0051603]	threonine-type endopeptidase activity[GO:0004298]	proteasome core complex[GO:0005839]	NA
TR25813|c0_g1_i2	180.015	278.11	0.627542	0.413822	1.1275	No	hypothetical protein MIMGU_mgv1a0056112mg, partial	Mimulus guttatus	NA	D-xylose metabolic process[GO:0042732] ; pentose-phosphate shunt[GO:0006098]	metal ion binding[GO:0046872] ; xylose isomerase activity[GO:0009045]	NA	map00051:Fructose and mannose metabolism(isomerase[ec:5.3.1.5]) ; map00040:Pentose and glucuronate interconversions(isomerase[ec:5.3.1.5])
TR32168|c0_g3_i4	180.015	278.11	0.627542	0.413822	1.12755	No	phosphate-responsive 1 family protein	Populus trichocarpa	NA	NA	NA	NA	NA
TR30860|c1_g3_i5	66.434	102.658	0.627855	0.460347	1.13284	No	PREDICTED: putative GATA transcription factor 22	Sesamum indicum	NA	NA	NA	NA	NA
TR39005|c0_g4_i4	66.434	102.658	0.627855	0.460347	1.13268	No	PREDICTED: uncharacterized protein LOC105156918	Sesamum indicum	NA	NA	NA	NA	NA
TR42541|c0_g1_i5	66.434	102.658	0.627855	0.460347	1.13273	No	NA	NA	NA	NA	NA	NA	NA
TR42225|c1_g1_i3	550.76	851.13	0.627957	0.368138	1.13967	No	PREDICTED: cellulose synthase-like protein G3	Sesamum indicum	NA	NA	NA	NA	NA
TR41834|c0_g2_i2	171.443	265.045	0.62851	0.416229	1.12906	No	PREDICTED: acetylornithine aminotransferase, chloroplastic/mitochondrial-like	Sesamum indicum	NA	NA	NA	NA	NA
TR43299|c0_g2_i2	85.7213	132.522	0.62851	0.451641	1.13196	No	PREDICTED: uncharacterized protein LOC105166784	Sesamum indicum	NA	NA	NA	NA	NA
TR4111|c1_g6_i1	85.7213	132.522	0.62851	0.451641	1.13201	No	NA	NA	NA	NA	NA	NA	NA
TR33144|c0_g1_i3	190.73	294.909	0.628739	0.409081	1.1247	No	PREDICTED: probable ATP-dependent RNA helicase DDX46	Sesamum indicum	NA	NA	NA	NA	NA
TR34424|c1_g5_i3	105.009	162.387	0.628925	0.442701	1.12926	No	PREDICTED: putative disease resistance protein RGA3	Sesamum indicum	NA	NA	NA	NA	NA
TR31330|c3_g4_i1	439.322	679.411	0.629006	0.371814	1.13524	No	NA	NA	NA	NA	NA	NA	NA
TR32651|c0_g2_i9	143.583	222.115	0.62942	0.425804	1.13384	No	PREDICTED: protein kinase 2B, chloroplastic-like	Erythranthe guttatus	NA	NA	NA	NA	NA
TR36341|c1_g2_i6	364.316	563.687	0.629705	0.376654	1.13686	No	PREDICTED: protein NRT1/ PTR FAMILY 3.1 isoform X2	Sesamum indicum	NA	NA	NA	NA	NA
TR31807|c0_g1_i1	2968.1	4595.36	0.630636	0.403883	1.12855	No	PREDICTED: ATP-dependent Clp protease proteolytic subunit 3, chloroplastic	Sesamum indicum	NA	NA	NA	NA	NA
TR37867|c1_g4_i2	327.884	507.692	0.630766	0.379466	1.13511	No	PREDICTED: vacuolar cation/proton exchanger 3-like	Sesamum indicum	NA	NA	NA	NA	NA
TR37894|c2_g1_i1	19.2873	29.8642	0.630766	0.395883	1.1346	No	PREDICTED: DNA (cytosine-5)-methyltransferase DRM2-like	Sesamum indicum	NA	NA	NA	NA	NA
TR39266|c0_g1_i1	19.2873	29.8642	0.630766	0.395883	1.13497	No	PREDICTED: beta-galactosidase 3-like	Nicotiana sylvestris	NA	NA	NA	NA	NA
TR22877|c0_g1_i2	19.2873	29.8642	0.630766	0.395883	1.13503	No	PREDICTED: probable alpha,alpha-trehalose-phosphate synthase [UDP-forming] 10	Sesamum indicum	NA	NA	NA	NA	NA
TR27376|c0_g1_i1	19.2873	29.8642	0.630766	0.395883	1.13509	No	NA	NA	NA	NA	NA	NA	NA
TR37283|c0_g2_i2	19.2873	29.8642	0.630766	0.395883	1.13515	No	PREDICTED: uncharacterized protein LOC102605440	Solanum tuberosum	NA	regulation of transcription, DNA-templated[GO:0006355]	double-stranded DNA binding[GO:0003690]	mitochondrion[GO:0005739]	NA
TR40100|c2_g3_i1	19.2873	29.8642	0.630766	0.395883	1.13521	No	PREDICTED: uncharacterized protein At1g04910-like	Sesamum indicum	NA	NA	NA	NA	NA
TR43260|c1_g3_i1	19.2873	29.8642	0.630766	0.395883	1.13527	No	PREDICTED: protein NRT1/ PTR FAMILY 2.11-like	Nicotiana tomentosiformis	NA	NA	NA	NA	NA
TR43344|c0_g1_i2	19.2873	29.8642	0.630766	0.395883	1.13436	No	NA	NA	NA	NA	NA	NA	NA
TR43805|c0_g3_i1	19.2873	29.8642	0.630766	0.395883	1.13533	No	NA	NA	NA	NA	NA	NA	NA
TR44741|c6_g2_i10	19.2873	29.8642	0.630766	0.395883	1.13539	No	PREDICTED: probable disease resistance RPP8-like protein 2	Sesamum indicum	NA	NA	NA	NA	NA
TR28202|c0_g2_i2	19.2873	29.8642	0.630766	0.395883	1.13545	No	NA	NA	NA	NA	NA	NA	NA
TR32997|c0_g1_i1	19.2873	29.8642	0.630766	0.395883	1.13551	No	PREDICTED: uncharacterized protein LOC105165312	Sesamum indicum	NA	NA	NA	NA	NA
TR42010|c0_g1_i1	19.2873	29.8642	0.630766	0.395883	1.13576	No	PREDICTED: uncharacterized protein LOC105167921	Sesamum indicum	NA	NA	NA	NA	NA
TR42524|c1_g3_i1	19.2873	29.8642	0.630766	0.395883	1.13588	No	PREDICTED: lysophospholipid acyltransferase LPEAT2	Sesamum indicum	NA	NA	NA	NA	NA
TR33299|c3_g4_i4	173.586	268.778	0.630766	0.413699	1.12727	No	PREDICTED: uncharacterized protein LOC105169883, partial	Sesamum indicum	NA	NA	NA	NA	NA
TR34205|c0_g2_i6	173.586	268.778	0.630766	0.413699	1.12733	No	NA	NA	NA	NA	NA	NA	NA
TR43107|c0_g4_i1	115.724	179.185	0.630766	0.436398	1.12975	No	NA	NA	NA	NA	NA	NA	NA
TR34896|c0_g1_i1	77.1492	119.457	0.630766	0.45345	1.13394	No	Chaperone DnaJ-domain superfamily protein	Theobroma cacao	NA	NA	NA	integral component of membrane[GO:0016021] ; chloroplast[GO:0009507]	NA
TR8291|c0_g3_i1	77.1492	119.457	0.630766	0.45345	1.1341	No	hypothetical protein MIMGU_mgv1a001879mg	Mimulus guttatus	NA	transmembrane transport[GO:0055085]	NA	integral component of membrane[GO:0016021]	NA
TR34187|c0_g1_i1	77.1492	119.457	0.630766	0.45345	1.13405	No	PREDICTED: phosphatidylinositol/phosphatidylcholine transfer protein SFH2-like	Sesamum indicum	NA	NA	NA	NA	NA
TR38515|c1_g3_i1	38.5746	59.7284	0.630766	0.460566	1.13016	No	unnamed protein product	Coffea canephora	NA	ion transmembrane transport[GO:0034220]	ion channel activity[GO:0005216]	integral component of membrane[GO:0016021]	NA
TR30629|c0_g4_i1	38.5746	59.7284	0.630766	0.460566	1.13	No	30S ribosomal protein S31, mitochondrial precursor, putative	Ricinus communis	NA	NA	NA	ribosome[GO:0005840]	NA
TR24189|c1_g1_i1	38.5746	59.7284	0.630766	0.460566	1.13021	No	hypothetical protein MIMGU_mgv1a001106mg	Mimulus guttatus	NA	NA	NA	NA	NA
TR27821|c0_g1_i1	38.5746	59.7284	0.630766	0.460566	1.12995	No	PREDICTED: ubiquitin carboxyl-terminal hydrolase 8 isoform X1	Sesamum indicum	NA	NA	NA	NA	NA
[truncated: 51,561 more rows]
