# Supplementary material for: Altered Developmental and Metabolic Gene Expression in Basil Interspecific Hybrids
Source: Plants (Basel). 2022 Jul 18;11(14):1873. doi: 10.3390/plants11141873 (PMC9321874; doi:10.3390/plants11141873)
Supplement: Supplementary file 1 [file plants-11-01873-s001.zip › Table S11_DGE_OKP2_vs_F1 .XLSX.xlsx]

## Sheet: OK_P2 specific
TrID	OK
TR10077|c0_g1_i1	22
TR1128|c0_g1_i1	14
TR11878|c0_g1_i1	24
TR12578|c0_g1_i1	12
TR13914|c0_g1_i1	16
TR1399|c0_g1_i1	18
TR15012|c0_g2_i1	14
TR15804|c0_g1_i1	22
TR16454|c0_g1_i1	36
TR16793|c0_g1_i1	18
TR17324|c0_g1_i1	20
TR18702|c0_g1_i1	14
TR18831|c0_g1_i1	12
TR18920|c0_g1_i1	12
TR19158|c0_g1_i1	26
TR19437|c0_g1_i1	34
TR19595|c0_g1_i1	32
TR19948|c0_g1_i1	36
TR20234|c0_g1_i1	20
TR20268|c0_g1_i1	12
TR20752|c0_g1_i1	12
TR20904|c0_g1_i1	26
TR21007|c0_g1_i3	18
TR21055|c0_g1_i6	68
TR21070|c0_g1_i1	26
TR21214|c0_g1_i1	10
TR2158|c0_g1_i1	42
TR21622|c0_g1_i1	28
TR21665|c0_g1_i1	14
TR21670|c0_g1_i1	44
TR2173|c0_g1_i3	40
TR21853|c0_g1_i2	36
TR21899|c0_g1_i1	22
TR2192|c0_g1_i1	102
TR22096|c0_g1_i1	20
TR2223|c0_g1_i1	24
TR22362|c0_g1_i1	30
TR22440|c0_g1_i1	20
TR2263|c1_g2_i1	34
TR2270|c0_g1_i1	34
TR22707|c0_g1_i1	16
TR22783|c0_g1_i1	14
TR22836|c0_g2_i1	44
TR22848|c0_g2_i1	32
TR2286|c0_g1_i2	50
TR22941|c0_g1_i2	22
TR2296|c0_g4_i1	24
TR23046|c0_g1_i1	20
TR2311|c0_g4_i1	32
TR23163|c0_g1_i1	16
TR23190|c0_g1_i2	38
TR23354|c0_g1_i3	18
TR2338|c0_g1_i3	180
TR2345|c0_g1_i1	42
TR2345|c0_g1_i2	68
TR2355|c1_g2_i5	28
TR2361|c2_g1_i4	58
TR23627|c0_g1_i2	16
TR23663|c0_g1_i1	22
TR23843|c0_g1_i1	10
TR23892|c1_g1_i1	72
TR23892|c1_g1_i2	32
TR23930|c0_g1_i1	30
TR2408|c0_g1_i10	70
TR2408|c0_g1_i9	54
TR2413|c0_g5_i1	78
TR24174|c0_g1_i2	66
TR24227|c0_g1_i3	14
TR24289|c0_g3_i2	158
TR24552|c1_g1_i2	72
TR24557|c0_g1_i5	16
TR24641|c0_g1_i1	26
TR24674|c0_g1_i2	58
TR24960|c0_g1_i2	26
TR24988|c0_g1_i1	22
TR25037|c0_g1_i2	26
TR25070|c0_g1_i1	26
TR25112|c0_g1_i1	18
TR25124|c0_g2_i3	44
TR25248|c0_g2_i1	28
TR25385|c0_g3_i1	16
TR25548|c0_g1_i3	36
TR25680|c0_g1_i1	34
TR25833|c0_g1_i2	54
TR25892|c0_g1_i1	56
TR25892|c0_g1_i2	24
TR25892|c0_g1_i3	32
TR25919|c0_g1_i2	26
TR2605|c0_g1_i2	30
TR26061|c0_g1_i2	26
TR26072|c0_g1_i2	34
TR26185|c0_g1_i3	32
TR26227|c2_g1_i1	26
TR26299|c0_g1_i3	20
TR2632|c1_g1_i1	48
TR26378|c0_g1_i2	16
TR26443|c0_g1_i1	246
TR2655|c0_g3_i1	110
TR26605|c0_g1_i1	22
TR26616|c0_g1_i3	76
TR26679|c1_g2_i4	12
TR26704|c1_g1_i3	40
TR2672|c0_g1_i1	22
TR26722|c0_g1_i2	32
TR26729|c0_g2_i1	26
TR2673|c2_g2_i2	36
TR2673|c2_g2_i6	16
TR26892|c0_g5_i1	14
TR26907|c0_g1_i2	18
TR26922|c1_g1_i5	24
TR26949|c0_g1_i3	26
TR2699|c1_g5_i1	16
TR27055|c0_g6_i1	32
TR27079|c0_g1_i1	14
TR27079|c0_g2_i1	34
TR27086|c0_g2_i1	26
TR27134|c0_g1_i1	136
TR27254|c0_g1_i3	52
TR27376|c0_g1_i1	30
TR27472|c0_g2_i1	22
TR27494|c0_g1_i1	20
TR27519|c0_g1_i3	132
TR27527|c0_g1_i3	26
TR27648|c0_g3_i1	32
TR2769|c0_g1_i2	24
TR27744|c0_g1_i1	22
TR2778|c0_g2_i9	20
TR27818|c1_g1_i1	24
TR27831|c0_g1_i2	28
TR27860|c0_g1_i3	50
TR28035|c0_g1_i1	68
TR28081|c0_g1_i1	52
TR28116|c0_g2_i1	18
TR28126|c1_g1_i3	60
TR28140|c0_g1_i1	14
TR28218|c0_g1_i3	62
TR28236|c0_g3_i2	18
TR28302|c0_g2_i5	70
TR2831|c0_g1_i2	38
TR2832|c0_g1_i1	16
TR28347|c0_g1_i2	268
TR28380|c0_g1_i2	32
TR28385|c0_g1_i6	24
TR28409|c0_g1_i3	52
TR28458|c0_g1_i4	14
TR2847|c1_g5_i4	66
TR2847|c1_g5_i5	56
TR28599|c1_g1_i1	14
TR28668|c0_g1_i2	12
TR2870|c0_g1_i2	22
TR28816|c1_g2_i4	28
TR28845|c0_g1_i4	50
TR28846|c0_g4_i2	98
TR28853|c0_g2_i1	10
TR28880|c0_g1_i1	26
TR28880|c0_g3_i7	110
TR28883|c0_g1_i3	36
TR28903|c0_g8_i1	30
TR28915|c0_g2_i1	20
TR28924|c0_g1_i2	26
TR28950|c0_g1_i4	34
TR28958|c0_g1_i2	32
TR28972|c0_g1_i2	68
TR2902|c0_g1_i1	52
TR2902|c0_g1_i8	20
TR29038|c0_g1_i1	62
TR29049|c0_g1_i2	18
TR29064|c0_g6_i1	14
TR29083|c0_g1_i1	16
TR29122|c0_g2_i2	122
TR29145|c0_g1_i2	36
TR2918|c0_g1_i1	70
TR29243|c0_g2_i5	14
TR29254|c2_g1_i1	44
TR29332|c0_g1_i1	28
TR29357|c0_g2_i1	134
TR29415|c0_g1_i1	60
TR29517|c0_g1_i1	28
TR29519|c0_g1_i1	18
TR29540|c0_g3_i3	46
TR29629|c1_g5_i1	64
TR29638|c0_g1_i2	62
TR29642|c0_g1_i1	26
TR29675|c0_g1_i4	32
TR2968|c0_g1_i7	68
TR29694|c0_g2_i4	10
TR2973|c0_g4_i2	22
TR2976|c0_g2_i1	28
TR29824|c0_g1_i3	22
TR29848|c0_g1_i1	40
TR29871|c0_g2_i2	96
TR29886|c0_g2_i2	48
TR29940|c1_g1_i4	24
TR29964|c0_g1_i3	32
TR30026|c0_g1_i1	62
TR30032|c0_g1_i2	72
TR30130|c1_g2_i3	54
TR30130|c1_g8_i9	52
TR30171|c0_g3_i2	84
TR30216|c0_g2_i1	92
TR30222|c0_g2_i1	20
TR3026|c1_g1_i2	40
TR30309|c0_g2_i1	20
TR30389|c0_g1_i5	46
TR30417|c0_g1_i1	38
TR30419|c0_g1_i1	28
TR30546|c0_g1_i2	44
TR30554|c0_g1_i2	94
TR30591|c0_g1_i3	66
TR30660|c0_g1_i2	52
TR30670|c0_g4_i1	52
TR30675|c0_g2_i2	52
TR30699|c1_g3_i1	128
TR30703|c0_g3_i2	70
TR30761|c0_g1_i2	56
TR3078|c0_g1_i1	24
TR30783|c0_g5_i1	88
TR3079|c0_g1_i1	30
TR30792|c0_g2_i1	14
TR30804|c2_g1_i3	56
TR30840|c0_g2_i1	22
TR30892|c0_g1_i1	46
TR30903|c0_g1_i3	42
TR30928|c0_g4_i5	38
TR30944|c0_g2_i2	18
TR30946|c0_g2_i1	40
TR30950|c0_g1_i2	28
TR30961|c0_g1_i2	24
TR30985|c0_g1_i7	84
TR31020|c0_g1_i1	70
TR31045|c0_g1_i2	16
TR31048|c0_g1_i1	32
TR3105|c1_g1_i2	50
TR31066|c0_g6_i1	1444
TR31077|c0_g2_i3	22
TR31091|c0_g4_i4	16
TR3110|c0_g1_i1	86
TR31107|c0_g4_i2	20
TR3113|c0_g2_i5	52
TR31153|c0_g1_i1	36
TR31153|c0_g1_i3	14
TR31188|c0_g1_i3	30
TR31209|c0_g1_i1	58
TR31265|c0_g1_i1	16
TR31292|c0_g1_i4	82
TR3133|c0_g1_i5	110
TR31445|c0_g1_i1	40
TR31446|c0_g2_i1	18
TR3156|c1_g6_i3	50
TR31573|c1_g4_i1	536
TR31629|c0_g1_i2	62
TR31776|c1_g1_i1	14
TR31779|c0_g1_i7	56
TR31795|c0_g1_i2	52
TR31795|c0_g1_i4	22
TR31820|c0_g10_i4	106
TR31821|c0_g1_i1	30
TR31832|c1_g1_i4	20
TR31885|c1_g1_i1	14
TR31890|c0_g6_i1	18
TR31924|c0_g2_i3	46
TR31939|c0_g2_i2	28
TR31941|c0_g2_i1	12
TR31959|c0_g3_i3	52
TR31967|c0_g1_i3	114
TR32034|c0_g4_i4	72
TR32098|c0_g2_i4	66
TR32111|c1_g1_i1	16
TR32113|c1_g3_i1	82
TR32115|c1_g2_i1	42
TR32116|c0_g1_i3	356
TR32158|c0_g1_i3	30
TR32168|c0_g3_i2	38
TR32182|c0_g3_i4	96
TR32182|c0_g3_i7	88
TR32194|c0_g1_i1	26
TR32194|c0_g3_i1	72
TR32195|c0_g2_i1	12
TR32200|c0_g2_i1	94
TR32200|c0_g3_i1	22
TR32250|c0_g5_i1	46
TR32277|c1_g8_i1	14
TR32299|c0_g1_i1	90
TR32299|c0_g1_i2	78
TR32299|c0_g1_i3	36
TR32300|c3_g1_i2	46
TR32304|c0_g3_i7	14
TR32311|c1_g2_i5	28
TR32347|c0_g2_i7	24
TR3235|c0_g2_i2	28
TR32375|c0_g1_i1	232
TR32382|c1_g1_i5	20
TR32440|c0_g4_i1	20
TR32450|c0_g1_i2	14
TR32519|c2_g4_i3	40
TR3252|c0_g1_i4	104
TR3255|c0_g1_i1	26
TR3255|c0_g1_i3	38
TR32556|c0_g1_i1	58
TR32564|c1_g2_i1	10
TR32646|c0_g1_i3	110
TR32678|c0_g2_i1	110
TR32686|c0_g2_i3	18
TR32694|c3_g4_i1	130
TR32706|c0_g1_i3	24
TR32742|c2_g1_i2	18
TR32759|c1_g3_i6	32
TR32776|c1_g2_i1	48
TR32784|c0_g5_i1	18
TR32812|c0_g2_i1	24
TR32819|c0_g1_i1	38
TR32857|c0_g1_i1	16
TR32857|c0_g1_i5	42
TR32864|c0_g5_i1	26
TR32864|c0_g6_i1	50
TR32868|c0_g1_i4	64
TR32924|c0_g9_i1	32
TR32963|c1_g1_i4	16
TR32991|c2_g1_i8	18
TR32998|c1_g2_i3	10
TR33042|c0_g1_i1	34
TR33043|c0_g1_i1	56
TR33049|c1_g1_i1	20
TR33103|c0_g1_i1	94
TR33114|c0_g3_i3	24
TR33127|c0_g1_i2	80
TR33157|c0_g2_i2	16
TR33162|c0_g1_i1	52
TR33173|c0_g1_i5	28
TR3321|c0_g5_i1	16
TR33214|c1_g3_i1	18
TR33214|c1_g4_i2	10
TR33218|c0_g1_i1	14
TR33276|c0_g1_i2	48
TR33286|c1_g1_i1	22
TR33286|c1_g4_i1	18
TR33287|c0_g6_i3	18
TR33309|c0_g2_i1	50
TR33336|c0_g3_i1	28
TR33339|c0_g1_i5	68
TR33351|c2_g3_i1	16
TR33386|c0_g6_i1	34
TR33401|c0_g2_i1	22
TR33411|c0_g3_i2	74
TR33439|c0_g13_i5	112
TR33466|c1_g2_i3	114
TR33593|c0_g4_i2	38
TR33598|c0_g1_i6	264
TR33599|c0_g2_i4	32
TR33624|c0_g1_i5	72
TR33660|c1_g4_i1	14
TR33711|c0_g1_i1	86
TR33711|c0_g1_i2	86
TR33711|c0_g1_i3	76
TR33723|c0_g1_i8	346
TR33732|c1_g2_i1	22
TR33734|c0_g1_i2	22
TR33752|c0_g1_i2	66
TR33755|c0_g1_i3	34
TR3376|c0_g1_i1	28
TR33762|c0_g2_i8	76
TR33779|c0_g2_i1	70
TR33804|c0_g1_i4	32
TR33817|c1_g2_i3	16
TR33822|c0_g2_i6	24
TR33827|c0_g2_i2	36
TR33856|c0_g1_i1	24
TR33874|c0_g1_i2	34
TR3388|c0_g1_i5	22
TR33890|c0_g1_i1	74
TR33920|c0_g1_i1	76
TR33948|c0_g5_i1	68
TR33958|c0_g1_i2	24
TR33973|c0_g1_i7	84
TR33980|c1_g1_i2	10
TR33989|c0_g2_i7	32
TR34013|c1_g1_i2	124
TR34055|c0_g3_i1	14
TR34070|c0_g1_i1	80
TR34072|c0_g1_i5	48
TR34123|c0_g1_i1	66
TR34126|c0_g2_i1	22
TR34126|c2_g5_i1	34
TR3416|c0_g2_i1	14
TR34179|c0_g1_i1	24
TR34179|c0_g1_i4	20
TR34194|c0_g2_i9	26
TR34266|c1_g1_i1	126
TR34271|c2_g5_i1	44
TR34277|c0_g1_i2	44
TR34296|c0_g1_i2	54
TR34318|c1_g3_i1	24
TR34373|c0_g1_i2	200
TR34373|c0_g1_i4	114
TR34377|c0_g1_i6	26
TR34382|c0_g3_i4	36
TR34390|c0_g1_i2	214
TR34414|c0_g2_i6	86
TR34417|c0_g2_i1	128
TR34459|c0_g3_i1	28
TR34468|c0_g8_i1	18
TR34482|c0_g1_i2	102
TR34496|c0_g1_i7	24
TR34508|c0_g1_i8	70
TR34542|c0_g4_i1	30
TR34565|c2_g5_i1	26
TR34576|c0_g3_i2	26
TR34625|c0_g1_i3	54
TR34627|c0_g2_i1	26
TR3463|c0_g2_i2	58
TR34640|c0_g1_i3	18
TR34640|c1_g1_i5	32
TR34643|c0_g1_i3	36
TR34666|c0_g1_i3	62
TR34721|c0_g1_i2	110
TR34742|c0_g1_i1	68
TR34759|c2_g2_i4	28
TR34760|c2_g1_i3	34
TR34768|c0_g1_i1	22
TR34770|c1_g1_i2	28
TR34776|c0_g1_i3	74
TR34776|c0_g2_i2	44
TR3480|c1_g1_i6	62
TR34810|c0_g3_i1	26
TR34846|c0_g1_i2	18
TR3485|c0_g3_i1	24
TR34894|c0_g5_i1	32
TR3491|c0_g2_i1	18
TR34919|c0_g1_i5	20
TR34920|c0_g1_i8	38
TR34988|c0_g1_i6	14
TR35006|c2_g1_i3	30
TR35017|c0_g1_i2	76
TR35040|c0_g2_i4	302
TR35051|c1_g1_i1	20
TR35051|c1_g5_i1	26
TR3506|c3_g1_i2	22
TR35066|c0_g2_i1	10
TR35080|c0_g1_i4	60
TR35086|c0_g1_i4	26
TR35091|c0_g1_i2	26
TR35133|c0_g1_i1	140
TR3514|c2_g11_i1	22
TR3515|c0_g1_i4	30
TR35169|c0_g1_i4	52
TR35233|c2_g2_i11	68
TR35233|c2_g2_i9	68
TR35237|c0_g1_i1	18
TR35242|c0_g1_i2	28
TR35242|c0_g2_i1	36
TR35263|c0_g2_i2	52
TR35266|c1_g1_i3	40
TR35266|c1_g3_i5	46
TR35267|c0_g1_i4	86
TR35279|c0_g4_i1	16
TR35289|c0_g1_i2	22
TR3529|c2_g1_i8	46
TR35305|c0_g1_i1	32
TR35340|c1_g1_i4	32
TR35350|c0_g2_i1	38
TR35357|c0_g1_i2	60
TR35371|c2_g1_i5	1582
TR35385|c0_g4_i1	132
TR35389|c0_g1_i3	52
TR35392|c0_g1_i4	84
TR35447|c0_g1_i4	144
TR35462|c0_g1_i1	134
TR35462|c0_g1_i3	60
TR3548|c1_g3_i1	26
TR35492|c1_g1_i1	30
TR35507|c0_g1_i1	42
TR35509|c0_g1_i4	28
TR3551|c0_g1_i3	34
TR35567|c0_g3_i2	142
TR3557|c0_g1_i3	36
TR3559|c0_g1_i2	26
TR35603|c1_g1_i1	20
TR35607|c0_g1_i1	90
TR35607|c0_g1_i8	94
TR35614|c1_g1_i3	26
TR35674|c0_g2_i7	116
TR35674|c0_g3_i1	24
TR35710|c0_g1_i5	32
TR35738|c0_g2_i4	50
TR35742|c0_g1_i5	14
TR35752|c0_g2_i1	14
TR35766|c2_g5_i2	34
TR35825|c0_g1_i1	98
TR35849|c4_g6_i1	28
TR35853|c2_g2_i1	42
TR35894|c0_g1_i3	20
TR35932|c1_g2_i1	20
TR35932|c1_g3_i1	70
TR35964|c0_g1_i3	114
TR35972|c0_g3_i5	26
TR35975|c0_g2_i1	20
TR35976|c0_g2_i3	48
TR35980|c2_g2_i1	90
TR35982|c0_g6_i1	136
TR35983|c0_g1_i2	140
TR35984|c0_g1_i4	24
TR36003|c0_g1_i1	40
TR36028|c1_g2_i1	26
TR36033|c1_g1_i1	12
TR36051|c0_g2_i1	70
TR36180|c0_g2_i1	30
TR36219|c0_g1_i1	28
TR36229|c0_g1_i1	146
TR36238|c1_g6_i3	18
TR36240|c0_g4_i2	50
TR36260|c0_g1_i2	68
TR36268|c1_g2_i1	14
TR36273|c0_g3_i1	32
TR36288|c0_g1_i1	30
TR36289|c0_g3_i16	56
TR36303|c0_g1_i1	24
TR36326|c1_g5_i8	10
TR36339|c1_g1_i2	354
TR36342|c0_g1_i6	42
TR36352|c0_g2_i3	52
TR36374|c0_g7_i2	40
TR36396|c0_g5_i2	30
TR36396|c0_g5_i3	40
TR36401|c0_g1_i1	18
TR36403|c0_g2_i1	128
TR36411|c0_g1_i10	28
TR36420|c0_g1_i7	36
TR36440|c0_g5_i1	10
TR36480|c1_g1_i5	30
TR36539|c0_g1_i1	86
TR36603|c3_g2_i5	82
TR36619|c0_g1_i4	340
TR36635|c0_g2_i1	16
TR36650|c0_g3_i6	58
TR3667|c3_g1_i3	136
TR3667|c3_g1_i4	76
TR36735|c0_g1_i1	226
TR36751|c0_g1_i2	80
TR36762|c1_g3_i1	30
TR36825|c1_g1_i7	32
TR36826|c1_g4_i1	20
TR36832|c0_g5_i1	38
TR36836|c1_g2_i4	60
TR36838|c1_g1_i9	166
TR36910|c1_g1_i4	20
TR36915|c1_g1_i2	20
TR36934|c0_g3_i10	42
TR36958|c0_g2_i4	64
TR36960|c0_g1_i4	84
TR36989|c0_g2_i3	72
TR36989|c0_g2_i4	98
TR36991|c1_g1_i2	186
TR36995|c0_g3_i1	438
TR37008|c0_g6_i1	16
TR37020|c1_g1_i1	30
TR37027|c0_g4_i2	16
TR3706|c1_g8_i1	12
TR37061|c0_g3_i1	28
TR37067|c0_g3_i1	20
TR37086|c1_g2_i5	40
TR37092|c4_g4_i2	92
TR3712|c0_g1_i1	26
TR37126|c0_g1_i1	44
TR37171|c3_g3_i3	20
TR37199|c0_g1_i3	172
TR37212|c0_g5_i5	26
TR37219|c2_g2_i4	22
TR37228|c0_g2_i1	44
TR37257|c1_g4_i2	18
TR37263|c3_g4_i1	36
TR3727|c0_g1_i5	28
TR37272|c1_g1_i7	86
TR37280|c0_g3_i6	46
TR37283|c0_g2_i2	22
TR37302|c0_g3_i1	28
TR37351|c0_g1_i2	108
TR37366|c0_g2_i2	22
TR37370|c0_g1_i3	38
TR37382|c0_g6_i2	40
TR37384|c0_g2_i4	102
TR37384|c0_g3_i1	116
TR3740|c0_g1_i1	14
TR37400|c0_g1_i1	40
TR3744|c0_g1_i1	10
TR37444|c3_g3_i1	12
TR37457|c0_g1_i11	66
TR37466|c0_g2_i1	114
TR37471|c2_g10_i3	152
TR37474|c1_g6_i2	78
TR37475|c0_g4_i1	58
TR37478|c0_g1_i1	42
TR37491|c0_g3_i5	32
TR37541|c1_g4_i1	16
TR37548|c0_g1_i2	48
TR37551|c1_g1_i4	24
TR37573|c1_g6_i6	68
TR37576|c0_g1_i1	38
TR37587|c0_g1_i3	30
TR37588|c1_g2_i1	14
TR37625|c0_g3_i1	22
TR37635|c0_g3_i9	70
TR3765|c0_g3_i1	28
TR37662|c0_g3_i1	14
TR3767|c0_g1_i1	26
TR37736|c0_g8_i1	30
TR37789|c0_g3_i1	28
TR37789|c0_g5_i2	44
TR3779|c0_g2_i2	14
TR3779|c0_g3_i1	90
TR37795|c0_g2_i6	60
TR37819|c2_g2_i2	108
TR37822|c0_g1_i1	16
TR37822|c0_g4_i3	50
TR37826|c0_g1_i2	72
TR37831|c2_g1_i1	12
TR37845|c0_g1_i2	18
TR37850|c0_g4_i3	22
TR37852|c1_g1_i3	52
TR37908|c0_g1_i4	82
TR37914|c0_g14_i1	54
TR37938|c1_g3_i2	64
TR37954|c1_g3_i6	30
TR37982|c1_g8_i1	38
TR37986|c1_g1_i1	16
TR37989|c1_g1_i1	14
TR38002|c0_g1_i2	60
TR38010|c0_g1_i7	26
TR38011|c2_g3_i5	28
TR38046|c0_g1_i5	112
TR3805|c1_g1_i6	20
TR38081|c1_g1_i3	164
TR38097|c0_g4_i3	104
TR38097|c0_g5_i3	26
TR38108|c0_g8_i3	16
TR38131|c0_g2_i1	26
TR38136|c1_g3_i5	34
TR38139|c0_g2_i1	18
TR38148|c0_g6_i1	126
TR38152|c0_g1_i3	20
TR38175|c1_g2_i1	36
TR38182|c0_g4_i1	38
TR38182|c0_g6_i1	36
TR38188|c0_g1_i6	212
TR38217|c1_g3_i3	12
TR38231|c0_g1_i5	88
TR38274|c0_g3_i5	100
TR38299|c0_g2_i1	32
TR38318|c1_g1_i2	48
TR38334|c0_g5_i2	78
TR38341|c0_g3_i2	38
TR38350|c0_g2_i4	68
TR38398|c0_g4_i2	36
TR38419|c0_g1_i2	98
TR3844|c1_g1_i9	36
TR38460|c0_g1_i2	66
TR38468|c0_g1_i1	20
TR38470|c0_g5_i3	22
TR38487|c0_g2_i4	50
TR3849|c0_g1_i5	26
TR38498|c0_g2_i1	108
TR3850|c0_g1_i1	226
TR38514|c1_g1_i2	118
TR38598|c0_g1_i1	12
TR3861|c0_g1_i4	18
TR38613|c0_g2_i6	138
TR38625|c0_g1_i1	26
TR38638|c0_g1_i1	10
TR38658|c0_g1_i1	154
TR38662|c1_g2_i1	12
TR38681|c0_g2_i1	20
TR38728|c0_g1_i1	24
TR38740|c0_g2_i5	20
TR38752|c0_g2_i11	104
TR38754|c1_g1_i3	22
TR38766|c0_g6_i2	64
TR38773|c0_g1_i1	12
TR38773|c0_g1_i2	20
TR38795|c0_g1_i5	26
TR38800|c1_g1_i1	28
TR38810|c1_g1_i1	96
TR38810|c1_g1_i4	32
TR38841|c0_g2_i5	86
TR38841|c0_g2_i9	24
TR38888|c0_g2_i2	28
TR38911|c2_g1_i3	14
TR38914|c0_g8_i3	46
TR38952|c0_g1_i1	150
TR38967|c0_g1_i1	24
TR38967|c0_g2_i4	24
TR38968|c0_g4_i1	14
TR38975|c0_g2_i5	82
TR39003|c0_g3_i9	20
TR39028|c0_g2_i1	48
TR39037|c0_g2_i1	34
TR39041|c0_g5_i1	18
TR39043|c0_g1_i1	130
TR39082|c2_g1_i1	50
TR39095|c0_g1_i1	30
TR39115|c1_g1_i1	12
TR39121|c1_g1_i1	38
TR39129|c1_g1_i5	20
TR39141|c1_g4_i1	28
TR39158|c2_g6_i1	10
TR39160|c0_g1_i4	110
TR39176|c0_g1_i1	36
TR39188|c0_g3_i5	44
TR39189|c0_g1_i1	16
TR3921|c1_g6_i1	26
TR39212|c0_g1_i2	26
TR39244|c0_g2_i4	18
TR39252|c0_g2_i1	14
TR39256|c0_g4_i1	30
TR39262|c1_g2_i4	50
TR39262|c1_g2_i9	26
TR3928|c1_g1_i14	14
TR39289|c0_g1_i3	22
TR39298|c0_g3_i1	114
TR39302|c0_g4_i5	56
TR39334|c1_g3_i5	36
TR39338|c0_g3_i2	64
TR39341|c0_g1_i1	14
TR39343|c0_g4_i2	22
TR39376|c0_g5_i11	24
TR39382|c0_g1_i10	82
TR39389|c0_g2_i6	18
TR39396|c2_g8_i5	28
TR39414|c1_g5_i1	24
TR39472|c2_g3_i1	34
TR39473|c0_g3_i1	16
TR3954|c1_g6_i1	16
TR39550|c0_g1_i2	36
TR39567|c0_g1_i2	60
TR39586|c1_g1_i5	14
TR39592|c0_g1_i2	32
TR39609|c0_g1_i2	100
TR39614|c0_g4_i1	14
TR39616|c0_g1_i1	46
TR39679|c0_g1_i1	80
TR39685|c0_g2_i4	40
TR39685|c0_g2_i5	14
TR39695|c0_g1_i3	28
TR39718|c1_g1_i13	36
TR39757|c0_g3_i2	28
TR39770|c0_g2_i9	154
TR39803|c0_g2_i3	24
TR39825|c0_g4_i2	36
TR39841|c0_g2_i2	64
TR39846|c0_g1_i1	76
TR39846|c0_g3_i1	24
TR39852|c0_g3_i6	28
TR39855|c1_g2_i2	28
TR39857|c0_g1_i2	20
TR39857|c0_g1_i5	18
TR39866|c0_g2_i10	40
TR39867|c1_g3_i1	32
TR39869|c3_g2_i2	108
TR39870|c1_g1_i11	20
TR39872|c0_g3_i1	16
TR39874|c1_g1_i2	98
TR39880|c0_g1_i3	40
TR39897|c2_g1_i1	76
TR39950|c0_g2_i3	20
TR39964|c0_g4_i5	92
TR39967|c0_g9_i1	52
TR39974|c0_g3_i1	48
TR39974|c0_g3_i6	50
TR39990|c0_g2_i2	38
TR39997|c3_g1_i1	28
TR39997|c3_g4_i9	18
TR40016|c0_g3_i1	36
TR40021|c1_g1_i1	82
TR40037|c0_g2_i4	48
TR40040|c0_g3_i1	16
TR4005|c0_g1_i1	40
TR40050|c0_g1_i8	40
TR4010|c0_g1_i2	42
TR40117|c0_g2_i6	104
TR40134|c0_g4_i6	12
TR40154|c1_g5_i1	18
TR40172|c0_g2_i3	26
TR40202|c0_g2_i1	16
TR40202|c0_g2_i4	126
TR40202|c0_g3_i3	28
TR40204|c0_g6_i4	34
TR40206|c0_g1_i1	22
TR40220|c0_g1_i4	20
TR40228|c0_g1_i1	18
TR40264|c0_g1_i2	28
TR40299|c0_g2_i1	54
TR4030|c0_g2_i3	18
TR40308|c0_g1_i1	10
TR40313|c0_g1_i1	14
TR40322|c0_g4_i3	24
TR40357|c0_g5_i1	20
TR40369|c0_g1_i2	42
TR40385|c0_g2_i17	46
TR40386|c0_g2_i3	22
TR40421|c1_g1_i2	52
TR40426|c0_g5_i1	18
TR40458|c1_g3_i1	22
TR40459|c0_g1_i2	14
TR40475|c3_g4_i2	12
TR40486|c0_g3_i5	12
TR40489|c1_g1_i10	22
TR40492|c1_g1_i1	174
TR40495|c0_g8_i1	14
TR40534|c0_g1_i9	14
TR40536|c0_g2_i5	14
TR40542|c0_g1_i1	26
TR40543|c1_g3_i6	36
TR40553|c0_g2_i3	46
TR40554|c0_g5_i1	18
TR40580|c1_g2_i2	24
TR40594|c1_g6_i1	12
TR40618|c0_g2_i1	20
TR40618|c0_g3_i2	48
TR40620|c0_g1_i1	202
TR40631|c1_g2_i5	88
TR40631|c1_g2_i9	126
TR40632|c0_g3_i2	46
TR40646|c0_g1_i1	22
TR40649|c2_g1_i1	42
TR40663|c0_g3_i1	44
TR40673|c1_g3_i3	42
TR40682|c0_g6_i5	46
TR40691|c0_g2_i1	22
TR40691|c0_g3_i4	16
TR40696|c0_g1_i3	26
TR40699|c1_g1_i1	22
TR40708|c1_g2_i6	40
TR40708|c1_g4_i1	20
TR40717|c0_g4_i3	30
TR40728|c0_g1_i7	102
TR40736|c0_g3_i2	14
TR40745|c0_g1_i1	100
TR40749|c0_g1_i1	12
TR40769|c0_g2_i3	42
TR40777|c4_g6_i2	28
TR40791|c0_g2_i1	18
TR40799|c0_g2_i1	62
TR40813|c0_g3_i1	20
TR40829|c0_g2_i4	78
TR40845|c0_g2_i1	12
TR40851|c1_g1_i2	14
TR40882|c0_g1_i1	42
TR40894|c1_g7_i1	20
TR40899|c0_g1_i1	18
TR4090|c0_g1_i1	82
TR40930|c0_g1_i6	28
TR40932|c1_g5_i1	12
TR40976|c1_g3_i4	20
TR40999|c0_g1_i1	26
TR41032|c0_g1_i7	88
TR41088|c0_g8_i3	32
TR41094|c1_g5_i22	80
TR41097|c2_g5_i3	20
TR41127|c1_g4_i2	108
TR41132|c2_g1_i4	16
TR41139|c1_g4_i6	46
TR41142|c0_g1_i1	22
TR41144|c0_g5_i2	34
TR41171|c0_g3_i5	42
TR41202|c0_g4_i1	14
TR41213|c0_g1_i2	34
TR41224|c0_g3_i1	38
TR41237|c1_g1_i21	110
TR41266|c3_g5_i6	42
TR41272|c1_g1_i5	18
TR41273|c1_g3_i3	38
TR41292|c0_g1_i1	26
TR41309|c0_g1_i1	30
TR41313|c0_g2_i6	98
TR41341|c0_g4_i1	18
TR41403|c2_g1_i4	30
TR41405|c0_g4_i1	16
TR41405|c0_g5_i1	12
TR41407|c0_g2_i2	30
TR41446|c0_g4_i4	52
TR41459|c0_g1_i1	46
TR41463|c2_g2_i1	18
TR41473|c0_g1_i4	48
TR41485|c0_g1_i1	18
TR41489|c0_g4_i1	18
TR41562|c1_g6_i4	12
TR41573|c1_g6_i1	22
TR41612|c0_g1_i1	18
TR41624|c0_g1_i1	26
TR41624|c0_g3_i1	110
TR41626|c0_g2_i3	58
TR41649|c0_g1_i1	78
TR41652|c1_g1_i5	22
TR41661|c0_g5_i1	26
TR41671|c1_g1_i1	52
TR41688|c0_g4_i1	12
TR41700|c1_g3_i1	72
TR41743|c0_g3_i1	20
TR41750|c0_g1_i7	28
TR41762|c0_g11_i1	24
TR41762|c0_g2_i1	14
TR41776|c1_g1_i5	130
TR41790|c0_g4_i1	48
TR41799|c0_g3_i1	22
TR41803|c0_g5_i2	74
TR41804|c0_g1_i1	20
TR41808|c0_g1_i2	60
TR41813|c0_g4_i2	152
TR41818|c2_g6_i6	16
TR41866|c1_g1_i4	82
TR41868|c1_g3_i1	102
TR41877|c0_g2_i1	18
TR41885|c0_g4_i3	46
TR41903|c1_g6_i1	16
TR41904|c1_g1_i1	20
TR41938|c0_g3_i2	12
TR41944|c0_g1_i9	26
TR41944|c0_g3_i3	36
TR41956|c0_g3_i6	38
TR41964|c0_g8_i6	34
TR41995|c1_g1_i1	12
TR42015|c0_g5_i1	92
TR42035|c0_g3_i3	24
TR42042|c0_g6_i1	20
TR42067|c1_g1_i1	22
TR42077|c0_g1_i5	124
TR42085|c0_g4_i1	16
TR42090|c0_g3_i5	26
TR42104|c0_g5_i1	14
TR42111|c0_g1_i5	20
TR42112|c0_g1_i1	34
TR42133|c0_g1_i2	90
TR42137|c0_g3_i7	52
TR42138|c0_g1_i3	14
TR42184|c1_g6_i4	24
TR42191|c0_g1_i1	14
TR42206|c0_g3_i3	50
TR42217|c0_g3_i1	20
TR42241|c0_g1_i3	52
TR42254|c0_g1_i2	52
TR42264|c0_g1_i6	44
TR42291|c0_g2_i2	14
TR42294|c0_g3_i1	22
TR42296|c1_g3_i1	32
TR42300|c0_g2_i3	18
TR42300|c0_g3_i4	46
TR42305|c1_g2_i6	30
TR42316|c0_g2_i1	24
TR42322|c0_g7_i1	14
TR42335|c1_g1_i4	36
TR42338|c0_g2_i7	74
TR42341|c0_g1_i2	42
TR42346|c1_g2_i1	58
TR42346|c1_g2_i2	36
TR42350|c1_g2_i2	32
TR42354|c0_g1_i3	24
TR42378|c0_g1_i1	42
TR42380|c0_g1_i2	76
TR42381|c1_g1_i3	42
TR42405|c2_g2_i4	56
TR42429|c0_g2_i1	138
TR42435|c1_g2_i20	12
TR42506|c1_g1_i5	12
TR42507|c0_g4_i3	34
TR42510|c0_g4_i2	14
TR42536|c0_g5_i1	14
TR42536|c0_g9_i1	10
TR42542|c0_g1_i1	36
TR42556|c1_g4_i1	24
TR42558|c1_g1_i10	38
TR42580|c0_g2_i1	60
TR42580|c0_g3_i3	34
TR42587|c2_g1_i1	36
TR42587|c2_g1_i3	12
TR42587|c2_g3_i2	16
TR42600|c0_g8_i4	32
TR42601|c0_g2_i5	52
TR42620|c0_g1_i3	100
TR42623|c1_g1_i1	20
TR42632|c0_g3_i5	56
TR42675|c1_g7_i2	18
TR42686|c0_g2_i3	94
TR42692|c0_g1_i2	64
TR42699|c0_g1_i1	14
TR42705|c0_g4_i1	32
TR42708|c0_g1_i5	18
TR42713|c0_g1_i3	14
TR42713|c1_g6_i1	42
TR42714|c1_g4_i1	16
TR42726|c1_g2_i2	46
TR42726|c1_g5_i1	42
TR42726|c1_g5_i2	14
TR42738|c1_g10_i1	28
TR42742|c1_g5_i1	14
TR42744|c0_g2_i2	16
TR42776|c0_g6_i4	58
TR42794|c0_g3_i4	18
TR42826|c1_g5_i2	36
TR42861|c0_g3_i1	18
TR42876|c0_g3_i2	254
TR42904|c0_g5_i1	24
TR42907|c0_g1_i2	50
TR42910|c0_g1_i1	50
TR42920|c0_g5_i1	12
TR42950|c0_g5_i8	16
TR42969|c0_g4_i1	40
TR42993|c0_g5_i4	148
TR43005|c2_g8_i2	68
TR43006|c1_g2_i2	74
TR43007|c0_g2_i5	78
TR43007|c0_g2_i8	52
TR43013|c0_g3_i1	18
TR43037|c0_g2_i1	12
TR43054|c0_g1_i2	72
TR43061|c0_g1_i2	16
TR43061|c0_g1_i5	22
TR43076|c0_g5_i1	14
TR43077|c0_g4_i1	46
TR43088|c1_g1_i1	64
TR43092|c0_g1_i3	504
TR43159|c0_g1_i4	28
TR43159|c0_g1_i6	22
TR43168|c1_g6_i5	24
TR43176|c0_g3_i1	46
TR43200|c0_g1_i3	76
TR43210|c0_g6_i1	14
TR43210|c0_g8_i4	14
TR43217|c0_g1_i1	228
TR43217|c0_g1_i2	100
TR43224|c1_g2_i1	14
TR43242|c0_g3_i1	14
TR43243|c1_g1_i1	28
TR43249|c0_g1_i1	16
TR43252|c0_g2_i9	78
TR43254|c0_g1_i5	16
TR43287|c0_g1_i1	42
TR43313|c0_g1_i3	30
TR43320|c0_g5_i1	14
TR43326|c0_g7_i1	10
TR43327|c0_g2_i2	24
TR43330|c1_g2_i7	14
TR43351|c0_g1_i2	86
TR43370|c0_g1_i1	34
TR43419|c1_g3_i1	14
TR43427|c0_g6_i1	18
TR43429|c0_g1_i2	20
TR43434|c1_g1_i5	20
TR43465|c1_g1_i1	22
TR43589|c0_g1_i2	20
TR43591|c0_g5_i1	14
TR43595|c1_g7_i1	80
TR43600|c0_g9_i1	20
TR43650|c0_g4_i4	36
TR43656|c1_g1_i1	12
TR43677|c0_g10_i1	14
TR43677|c0_g11_i1	20
TR43680|c2_g1_i5	38
TR43680|c2_g1_i7	32
TR43701|c1_g1_i1	20
TR43704|c3_g4_i1	14
TR43728|c0_g4_i1	14
TR43745|c1_g3_i2	16
TR43747|c0_g1_i3	52
TR43750|c1_g2_i3	54
TR43787|c0_g2_i2	74
TR43787|c0_g2_i3	44
TR43788|c1_g1_i5	50
TR43798|c0_g5_i2	26
TR43816|c0_g5_i2	82
TR43817|c2_g3_i1	24
TR43825|c0_g2_i2	50
TR43832|c1_g2_i1	22
TR43841|c0_g1_i3	22
TR43851|c1_g4_i3	28
TR43869|c0_g1_i1	20
TR43881|c2_g2_i2	40
TR43894|c2_g2_i2	12
TR43907|c0_g1_i1	30
TR43908|c1_g1_i3	18
TR43961|c1_g3_i1	16
TR43961|c1_g4_i3	82
TR43961|c1_g5_i1	122
TR43963|c0_g2_i1	58
TR43964|c0_g2_i1	22
TR43973|c2_g4_i1	38
TR43988|c0_g4_i1	16
TR44033|c0_g2_i3	132
TR44033|c0_g6_i6	26
TR44043|c2_g9_i7	34
TR44046|c0_g1_i3	178
TR44053|c1_g4_i1	16
TR44058|c2_g2_i2	34
TR44062|c1_g2_i1	12
TR44065|c1_g4_i2	26
TR44074|c0_g4_i2	14
TR44076|c0_g2_i1	14
TR44108|c1_g1_i2	36
TR44110|c0_g1_i2	74
TR44114|c0_g1_i6	60
TR44123|c1_g1_i2	48
TR44131|c4_g1_i1	22
TR44139|c2_g2_i1	28
TR44139|c2_g6_i1	16
TR44156|c1_g6_i7	14
TR44160|c2_g3_i3	20
TR44163|c0_g3_i1	34
TR44189|c1_g2_i4	36
TR44199|c3_g4_i2	34
TR44204|c1_g3_i1	20
TR44206|c0_g2_i1	44
TR44227|c0_g1_i3	16
TR44248|c4_g3_i1	12
TR44255|c0_g5_i1	22
TR44259|c2_g3_i2	54
TR44263|c1_g3_i1	58
TR44267|c0_g7_i1	90
TR44274|c2_g1_i5	62
TR44274|c2_g5_i1	10
TR44289|c0_g1_i3	36
TR44298|c1_g6_i1	22
TR44300|c2_g2_i1	48
TR44301|c1_g3_i1	16
TR44309|c1_g2_i3	34
TR44309|c1_g3_i3	36
TR44317|c0_g1_i1	20
TR44355|c2_g1_i4	30
TR44360|c0_g2_i3	44
TR44364|c1_g1_i1	22
TR44370|c0_g1_i1	16
TR44379|c0_g4_i4	16
TR44381|c3_g1_i1	20
TR44382|c0_g2_i2	38
TR44402|c0_g2_i6	40
TR44415|c0_g1_i5	64
TR44420|c2_g9_i2	14
TR44434|c2_g4_i1	22
TR44447|c2_g2_i1	54
TR44555|c2_g12_i1	12
TR44556|c2_g1_i2	52
TR44562|c2_g1_i5	36
TR44571|c5_g4_i1	22
TR44595|c0_g1_i1	20
TR44604|c3_g3_i3	16
TR44609|c8_g4_i1	70
TR44609|c8_g5_i6	116
TR44618|c0_g2_i2	34
TR44628|c1_g1_i1	110
TR44631|c0_g2_i3	72
TR44641|c2_g9_i1	28
TR44670|c1_g3_i1	28
TR44720|c0_g4_i3	12
TR44736|c0_g2_i1	26
TR44745|c2_g1_i1	16
TR44750|c1_g2_i2	18
TR44761|c0_g1_i2	22
TR44779|c2_g3_i1	12
TR44786|c2_g3_i3	22
TR44791|c1_g3_i3	30
TR44799|c1_g1_i2	24
TR44808|c4_g7_i1	14
TR44811|c3_g3_i2	22
TR44824|c2_g2_i2	24
TR44841|c1_g2_i1	60
TR44855|c1_g5_i2	16
TR44855|c2_g6_i1	22
TR44855|c3_g6_i1	36
TR44876|c0_g3_i3	66
TR44878|c3_g2_i4	36
TR44878|c4_g2_i1	38
TR7005|c0_g1_i1	22
TR7281|c0_g1_i3	36
TR7338|c0_g1_i3	68
TR7470|c0_g1_i1	220
TR7501|c0_g1_i1	22
TR7503|c1_g3_i1	30
TR7514|c0_g1_i2	38
TR7629|c0_g2_i1	72
TR7663|c0_g5_i2	74
TR7676|c1_g2_i1	46
TR7731|c5_g2_i1	18
TR7737|c0_g1_i2	80
TR7776|c0_g2_i1	14
TR7804|c0_g1_i2	24
TR7817|c0_g5_i1	110
TR7817|c0_g5_i2	70
TR7824|c0_g1_i3	220
TR7829|c0_g3_i1	26
TR7837|c0_g2_i1	44
TR7857|c0_g4_i1	36
TR7877|c0_g1_i5	78
TR7879|c0_g5_i1	20
TR7928|c0_g6_i1	14
TR7936|c0_g1_i3	48
TR7946|c0_g1_i5	72
TR8039|c0_g2_i2	34
TR8068|c1_g4_i4	24
TR8132|c0_g7_i1	14
TR8132|c0_g7_i2	20
TR8149|c0_g3_i4	38
TR8158|c0_g3_i5	42
TR8158|c0_g4_i1	16
TR8173|c0_g2_i2	48
TR8174|c3_g1_i1	124
TR8187|c0_g12_i1	42
TR8189|c0_g5_i3	38
TR8217|c0_g7_i1	22
TR8217|c0_g7_i2	14
TR8219|c0_g1_i2	48
TR8219|c0_g5_i1	16
TR8228|c0_g2_i3	12
TR8229|c5_g3_i1	22
TR8238|c0_g10_i1	408
TR8262|c1_g3_i1	34
TR8270|c1_g1_i1	28
TR8297|c2_g2_i2	54
TR8310|c0_g5_i2	20
TR9065|c0_g1_i1	20
TR9432|c0_g1_i1	18
TR9580|c0_g1_i1	14
TR9940|c0_g1_i1	16
TR10035|c1_g1_i1	22
TR1013|c0_g1_i1	20
TR10135|c0_g1_i1	22
TR10157|c0_g2_i1	12
TR10295|c0_g1_i2	38
TR10436|c0_g1_i1	38
TR1058|c0_g1_i1	66
TR10654|c0_g1_i1	50
TR10829|c0_g1_i1	12
TR10894|c0_g1_i1	18
TR1091|c0_g1_i1	16
TR10929|c0_g1_i1	22
TR10990|c0_g1_i1	22
TR11108|c0_g1_i1	12
TR1122|c0_g1_i1	10
TR11266|c0_g1_i1	20
TR11623|c0_g1_i1	26
TR11641|c0_g1_i1	26
TR11862|c1_g1_i1	68
TR11935|c0_g1_i1	40
TR12085|c0_g1_i1	20
TR12112|c0_g1_i1	22
TR12192|c0_g1_i1	22
TR12273|c0_g1_i1	20
TR12331|c0_g2_i1	20
TR12466|c0_g1_i2	32
TR12635|c0_g1_i1	24
TR12750|c0_g1_i3	30
TR12756|c0_g1_i1	24
TR12878|c0_g1_i1	16
TR1303|c0_g1_i1	16
TR13052|c0_g1_i1	14
TR13124|c0_g1_i1	34
TR13193|c0_g1_i1	14
TR13286|c0_g1_i2	16
TR1331|c0_g2_i1	24
TR13383|c0_g2_i1	24
TR13399|c0_g1_i1	22
TR13415|c0_g1_i1	24
TR13461|c0_g1_i1	10
TR1354|c1_g1_i1	32
TR13589|c0_g1_i1	20
TR13632|c0_g1_i1	16
TR13715|c0_g1_i1	32
TR13792|c0_g1_i2	20
TR13814|c0_g1_i1	78
TR14000|c0_g1_i1	18
TR14014|c0_g1_i1	24
TR14046|c0_g1_i1	26
TR14086|c0_g3_i1	52
TR14107|c0_g1_i2	44
TR14171|c0_g1_i1	80
TR14277|c0_g1_i1	28
TR14294|c0_g1_i1	66
TR14294|c0_g2_i1	38
TR14451|c0_g1_i1	60
TR14518|c0_g1_i1	72
TR14518|c0_g1_i2	66
TR14668|c0_g1_i1	24
TR14840|c0_g1_i1	26
TR14862|c0_g1_i1	24
TR14907|c0_g2_i1	14
TR14959|c0_g1_i1	24
TR15010|c0_g1_i1	24
TR15081|c0_g2_i1	18
TR15087|c0_g1_i1	20
TR15419|c0_g2_i1	60
TR15429|c0_g1_i1	26
TR15599|c0_g1_i1	8
TR15667|c0_g1_i1	62
TR15806|c0_g1_i1	14
TR15857|c0_g1_i1	60
TR15953|c0_g1_i1	42
TR15970|c0_g1_i1	12
TR16054|c1_g1_i1	38
TR16128|c0_g1_i1	18
TR16174|c0_g1_i1	32
TR16201|c0_g1_i2	14
TR16213|c0_g2_i1	16
TR16283|c0_g1_i1	16
TR16410|c0_g1_i2	12
TR16537|c0_g1_i1	40
TR16559|c0_g1_i2	22
TR1661|c0_g3_i1	16
TR16666|c0_g2_i1	112
TR16666|c0_g2_i2	100
TR16680|c1_g1_i1	10
TR16723|c0_g1_i1	48
TR16726|c0_g1_i1	24
TR16771|c0_g1_i1	20
TR1685|c0_g1_i1	16
TR16944|c0_g1_i1	28
TR16974|c0_g2_i1	12
TR17015|c0_g1_i1	22
TR17023|c0_g1_i1	58
TR17062|c0_g1_i1	16
TR1710|c1_g1_i1	42
TR17163|c0_g1_i3	60
TR17231|c0_g1_i1	12
TR17272|c0_g2_i1	14
TR1728|c0_g2_i1	18
TR17281|c0_g1_i4	14
TR17321|c0_g1_i1	16
TR17427|c0_g2_i1	48
TR17468|c0_g1_i2	12
TR17470|c0_g1_i1	42
TR17485|c0_g1_i1	26
TR1754|c0_g1_i2	58
TR1754|c0_g1_i3	48
TR17595|c0_g1_i2	18
TR17605|c0_g1_i1	20
TR17661|c0_g1_i1	42
TR17733|c0_g2_i1	64
TR17751|c0_g1_i1	28
TR17753|c0_g1_i1	14
TR17770|c0_g1_i1	32
TR17804|c0_g1_i1	18
TR1784|c0_g1_i1	18
TR17883|c0_g1_i2	132
TR17883|c0_g1_i4	136
TR17910|c0_g1_i1	22
TR17916|c0_g3_i1	20
TR17917|c0_g1_i1	36
TR17991|c1_g1_i1	14
TR18004|c0_g1_i1	14
TR18007|c0_g3_i1	34
TR18054|c0_g1_i1	18
TR18065|c0_g1_i1	12
TR18293|c0_g1_i1	58
TR18313|c0_g1_i1	30
TR18337|c0_g1_i1	28
TR18392|c0_g1_i1	22
TR18440|c0_g1_i1	32
TR1846|c0_g1_i1	26
TR18490|c0_g1_i1	16
TR18607|c0_g1_i3	34
TR18622|c0_g1_i1	14
TR18625|c0_g1_i1	32
TR18662|c0_g2_i1	28
TR18678|c0_g2_i1	18
TR18679|c0_g1_i2	48
TR18709|c0_g1_i1	44
TR18792|c1_g1_i1	44
TR18794|c0_g1_i1	18
TR18820|c0_g1_i1	12
TR18844|c0_g1_i2	24
TR1891|c0_g1_i1	24
TR1892|c0_g1_i1	52
TR18923|c0_g1_i1	22
TR18934|c0_g1_i1	18
TR18937|c0_g1_i1	34
TR19033|c0_g1_i2	38
TR19072|c0_g1_i1	20
TR19167|c0_g1_i2	36
TR19216|c0_g2_i1	30
TR19300|c0_g2_i2	38
TR19371|c0_g3_i2	10
TR19395|c0_g1_i3	34
TR19402|c0_g1_i1	18
TR19454|c0_g2_i1	14
TR19469|c1_g1_i1	20
TR19611|c0_g2_i1	24
TR19683|c0_g1_i1	30
TR19744|c0_g1_i1	26
TR19779|c0_g1_i1	22
TR1978|c0_g2_i1	20
TR19867|c0_g1_i2	24
TR19904|c0_g1_i3	78
TR19904|c0_g1_i4	72
TR19913|c0_g1_i1	30
TR19924|c0_g1_i1	48
TR1997|c0_g1_i2	38
TR19979|c0_g2_i1	16
TR19997|c0_g3_i2	112
TR20023|c0_g1_i2	66
TR20036|c0_g1_i1	26
TR20084|c0_g1_i1	18
TR20090|c0_g2_i2	36
TR20119|c0_g1_i1	40
TR20146|c0_g1_i1	14
TR20176|c0_g1_i1	24
TR20214|c0_g1_i2	24
TR20214|c0_g1_i3	28
TR20242|c0_g1_i2	22
TR20313|c0_g1_i4	436
TR20321|c0_g1_i1	24
TR20381|c0_g1_i3	20
TR20411|c0_g1_i1	16
TR20553|c0_g1_i2	22
TR20593|c0_g1_i2	20
TR20595|c0_g1_i1	22
TR20706|c0_g1_i1	38
TR20766|c0_g1_i1	22
TR20795|c0_g1_i1	16
TR20840|c0_g1_i1	70
TR20899|c0_g2_i1	66
TR21015|c0_g1_i1	14
TR21043|c1_g1_i1	70
TR21120|c0_g1_i1	38
TR21163|c0_g1_i1	14
TR21242|c0_g1_i1	30
TR21253|c0_g2_i1	16
TR21260|c0_g1_i1	28
TR21263|c0_g2_i1	36
TR21343|c0_g1_i4	20
TR21370|c0_g1_i1	334
TR21426|c0_g1_i4	14
TR21453|c2_g1_i1	30
TR21458|c0_g1_i1	14
TR21464|c0_g1_i2	22
TR21467|c0_g1_i1	16
TR2148|c0_g1_i1	12
TR21570|c0_g1_i1	32
TR21572|c0_g1_i1	58
TR2158|c0_g1_i3	44
TR2158|c0_g1_i4	34
TR21613|c1_g1_i1	24
TR21624|c0_g1_i2	82
TR21676|c0_g1_i1	32
TR21686|c0_g2_i1	14
TR2173|c0_g1_i1	76
TR2174|c1_g4_i1	34
TR21749|c0_g1_i1	26
TR2175|c1_g1_i1	60
TR2176|c0_g3_i2	36
TR2177|c0_g1_i4	48
TR2178|c1_g1_i2	12
TR2178|c6_g4_i1	62
TR21789|c0_g2_i1	18
TR21799|c0_g1_i2	18
TR21828|c0_g1_i1	48
TR21833|c0_g1_i1	38
TR21848|c0_g1_i2	42
TR2185|c0_g4_i1	18
TR21859|c0_g1_i1	30
TR21868|c0_g1_i3	32
TR2187|c0_g1_i6	296
TR21883|c0_g1_i1	36
TR21898|c0_g1_i1	20
TR2192|c0_g1_i4	22
TR21965|c0_g1_i2	50
TR2197|c0_g2_i3	90
TR2200|c0_g1_i2	60
TR22015|c0_g1_i2	36
TR2211|c0_g1_i1	74
TR22110|c0_g1_i1	22
TR22126|c0_g1_i2	18
TR22156|c0_g1_i1	14
TR22167|c0_g1_i1	68
TR22219|c0_g2_i1	16
TR22240|c1_g1_i1	26
TR22249|c0_g1_i4	26
TR22252|c0_g1_i2	68
TR22268|c0_g1_i1	18
TR22275|c0_g1_i1	26
TR22305|c0_g1_i3	14
TR22315|c0_g1_i2	66
TR22324|c0_g3_i1	22
TR2233|c3_g4_i1	30
TR22330|c0_g1_i2	26
TR2236|c0_g1_i2	16
TR22383|c0_g1_i1	784
TR22386|c0_g1_i2	28
TR22396|c0_g3_i1	16
TR2240|c0_g2_i1	16
TR2241|c0_g1_i4	42
TR2247|c0_g1_i2	20
TR22484|c0_g1_i1	16
TR22496|c0_g1_i1	182
TR22499|c0_g1_i1	30
TR2250|c2_g1_i1	26
TR2252|c0_g1_i1	54
TR2252|c0_g1_i3	34
TR22532|c0_g1_i2	40
TR22537|c0_g3_i1	26
TR2257|c0_g1_i2	54
TR2257|c0_g1_i4	22
TR22571|c0_g3_i1	14
TR22576|c0_g1_i2	42
TR22578|c0_g3_i1	34
TR22646|c0_g2_i1	24
TR2265|c0_g1_i1	18
TR22666|c0_g6_i3	30
TR2267|c0_g1_i1	34
TR2267|c0_g1_i2	68
TR22671|c0_g4_i1	42
TR22672|c0_g1_i3	20
TR22757|c0_g1_i1	22
TR22760|c0_g1_i1	22
TR22822|c0_g1_i4	82
TR22827|c0_g1_i3	26
TR22837|c0_g1_i1	18
TR22838|c0_g2_i1	28
TR22849|c0_g1_i1	18
TR2285|c0_g2_i13	54
TR2285|c0_g2_i3	38
TR22875|c0_g2_i3	32
TR22893|c0_g1_i1	20
TR22906|c0_g1_i1	64
TR2298|c0_g1_i3	64
TR22980|c0_g2_i1	32
TR23031|c0_g1_i1	52
TR23031|c0_g1_i2	62
TR23040|c0_g2_i1	14
TR2306|c0_g3_i2	92
TR23068|c0_g1_i1	34
TR2308|c3_g2_i1	22
TR23104|c0_g1_i2	34
TR23132|c0_g1_i1	26
TR23146|c0_g1_i1	74
TR23150|c1_g1_i2	54
TR23152|c0_g1_i1	32
TR23200|c1_g1_i5	26
TR23203|c0_g1_i1	42
TR23276|c0_g1_i1	36
TR23277|c0_g1_i1	34
TR2328|c0_g1_i6	26
TR23314|c0_g2_i1	16
TR23324|c1_g1_i1	18
TR23348|c0_g1_i3	546
TR23369|c0_g1_i2	28
TR23375|c0_g1_i5	16
TR23392|c0_g1_i2	12
TR23421|c0_g1_i1	26
TR2344|c0_g1_i3	44
TR2345|c0_g1_i4	32
TR23506|c0_g1_i1	16
TR2351|c0_g2_i1	22
TR23514|c0_g1_i4	24
TR23534|c0_g4_i1	22
TR23534|c0_g5_i1	44
TR23534|c0_g8_i1	20
TR2355|c2_g5_i2	46
TR23572|c0_g1_i2	22
TR23642|c0_g1_i2	28
TR2366|c0_g2_i6	22
TR23679|c0_g1_i1	28
TR2369|c0_g1_i4	28
TR23698|c0_g1_i1	20
TR2372|c0_g1_i1	16
TR23749|c0_g2_i1	24
TR2376|c0_g1_i1	38
TR2378|c0_g1_i4	50
TR23784|c0_g1_i1	26
TR23811|c0_g1_i1	14
TR23815|c0_g1_i2	44
TR23837|c0_g1_i1	22
TR23839|c0_g1_i2	76
TR23842|c0_g1_i3	154
TR2385|c0_g1_i3	12
TR23854|c0_g2_i2	14
TR2386|c1_g2_i2	50
TR2389|c0_g2_i4	40
TR23904|c0_g1_i1	104
TR23912|c0_g2_i1	42
TR23914|c0_g1_i4	36
TR23946|c0_g1_i1	20
TR23960|c0_g1_i1	44
TR2397|c0_g2_i1	32
TR23985|c0_g1_i1	40
TR24002|c0_g1_i2	78
TR24007|c0_g2_i1	14
TR24029|c0_g1_i2	22
TR24029|c0_g1_i3	68
TR24032|c0_g1_i2	72
TR24037|c0_g1_i3	56
TR24049|c0_g1_i1	24
TR2406|c0_g1_i1	66
TR2406|c0_g1_i2	58
TR24073|c0_g1_i2	26
TR24092|c0_g1_i3	28
TR24108|c0_g1_i1	60
TR24146|c1_g1_i3	30
TR2415|c3_g1_i1	38
TR24161|c0_g1_i2	38
TR2417|c0_g1_i1	128
TR2417|c0_g1_i5	218
TR24172|c0_g1_i1	20
TR24174|c0_g1_i1	40
TR2418|c0_g2_i3	14
TR24251|c1_g1_i2	50
TR24279|c0_g1_i3	20
TR24286|c0_g1_i2	24
TR24296|c0_g1_i1	20
TR24319|c0_g1_i2	48
TR2432|c1_g3_i4	38
TR24339|c0_g1_i2	32
TR24427|c0_g1_i1	34
TR24433|c0_g1_i1	26
TR24453|c0_g2_i1	20
TR24499|c0_g1_i1	34
TR24539|c0_g2_i2	106
TR24539|c0_g2_i3	100
TR2456|c0_g6_i1	20
TR2460|c0_g1_i1	20
TR24609|c0_g1_i2	48
TR24617|c0_g1_i1	42
TR24625|c0_g1_i5	38
TR24635|c0_g1_i4	42
TR24641|c0_g2_i1	30
TR2466|c0_g1_i2	58
TR24660|c2_g8_i1	38
TR24675|c0_g1_i1	24
TR24700|c0_g1_i1	26
TR24710|c0_g1_i2	42
TR24724|c0_g1_i2	48
TR2475|c0_g1_i1	240
TR24797|c0_g2_i1	20
TR24805|c0_g1_i1	26
TR24806|c0_g1_i1	14
TR24812|c0_g1_i4	18
TR2484|c0_g1_i1	14
TR2484|c0_g2_i1	26
TR2485|c3_g1_i1	48
TR2488|c0_g1_i1	128
TR24900|c1_g1_i2	98
TR24915|c0_g1_i1	78
TR24918|c0_g1_i1	16
TR24920|c0_g1_i1	80
TR24969|c0_g2_i1	36
TR2497|c0_g4_i2	56
TR24988|c0_g1_i3	48
TR25002|c0_g1_i1	28
TR25013|c0_g1_i1	462
TR2503|c0_g1_i1	22
TR25047|c0_g1_i1	20
TR2507|c0_g1_i5	22
TR25075|c0_g1_i4	46
TR2508|c2_g1_i1	44
TR25082|c1_g2_i1	18
TR25111|c0_g2_i3	214
TR2515|c0_g3_i1	68
TR2515|c0_g3_i2	42
TR25201|c0_g1_i4	58
TR25218|c0_g1_i4	16
TR25237|c0_g2_i2	22
TR25265|c0_g1_i1	430
TR25269|c0_g2_i1	20
TR25287|c0_g1_i1	42
TR25308|c0_g1_i1	32
TR25337|c0_g1_i1	38
TR25337|c0_g1_i6	40
TR25346|c0_g1_i1	52
TR25362|c0_g1_i1	20
TR25362|c0_g1_i3	24
TR25365|c0_g2_i1	126
TR25495|c0_g1_i3	108
TR25532|c1_g1_i1	58
TR25543|c0_g1_i1	60
TR25544|c1_g1_i3	26
TR25555|c0_g1_i2	18
TR25582|c0_g1_i1	38
TR2559|c2_g5_i2	22
TR25592|c1_g1_i1	90
TR25620|c0_g1_i1	14
TR25628|c0_g5_i1	28
TR25672|c0_g1_i1	24
TR25679|c0_g3_i2	40
TR2569|c0_g1_i3	22
TR25697|c0_g1_i1	34
TR2570|c0_g1_i11	16
TR25701|c3_g1_i1	18
TR25701|c3_g2_i1	24
TR25701|c4_g4_i1	18
TR25718|c0_g1_i4	48
TR2572|c0_g2_i2	26
TR25760|c0_g1_i2	24
TR25776|c0_g1_i4	66
TR25808|c0_g1_i1	40
TR25821|c1_g1_i3	34
TR25821|c1_g1_i6	34
TR2587|c0_g1_i2	32
TR25929|c0_g1_i3	50
TR25937|c0_g1_i1	38
TR25937|c0_g1_i2	64
TR25943|c0_g1_i1	12
TR25950|c0_g1_i3	16
TR25955|c0_g2_i2	26
TR25979|c0_g2_i1	16
TR25990|c0_g1_i1	20
TR25990|c0_g1_i2	38
TR25995|c1_g1_i3	48
TR26054|c0_g1_i1	78
TR26067|c0_g1_i3	56
TR26090|c0_g1_i1	38
TR26107|c0_g1_i3	26
TR2611|c0_g1_i1	16
TR26117|c0_g1_i6	16
TR26122|c0_g1_i5	28
TR26128|c1_g1_i1	36
TR26130|c2_g1_i1	32
TR26150|c0_g3_i1	16
TR2616|c0_g1_i2	268
TR2616|c0_g1_i3	70
TR26168|c0_g1_i1	50
TR26171|c0_g1_i2	18
TR26173|c0_g1_i2	32
TR26188|c3_g3_i1	38
TR26193|c0_g1_i5	34
TR2620|c5_g3_i8	12
TR26216|c0_g1_i2	262
TR26224|c0_g2_i1	24
TR26237|c0_g1_i6	38
TR26243|c0_g1_i1	22
TR26253|c0_g1_i2	20
TR26260|c0_g1_i2	16
TR26263|c0_g1_i1	60
TR26265|c0_g1_i2	120
TR26276|c0_g2_i3	76
TR2631|c1_g1_i2	84
TR26322|c0_g3_i1	48
TR26323|c0_g1_i1	32
TR26331|c0_g1_i2	40
TR26341|c0_g1_i3	62
TR26347|c0_g1_i2	24
TR2636|c0_g2_i2	88
TR2637|c0_g2_i1	32
TR26388|c0_g1_i3	234
TR26393|c0_g1_i2	38
TR26420|c0_g1_i1	58
TR26426|c0_g1_i3	36
TR26471|c1_g1_i2	68
TR2650|c1_g3_i2	22
TR2652|c2_g2_i7	24
TR26533|c0_g1_i4	66
TR26538|c0_g1_i1	30
TR26550|c0_g3_i1	30
TR26557|c0_g1_i3	20
TR26563|c2_g1_i1	42
TR26571|c0_g1_i3	50
TR2658|c0_g1_i3	84
TR26608|c0_g1_i1	88
TR26623|c0_g1_i2	28
TR26655|c0_g2_i1	58
TR2666|c1_g2_i5	24
TR26660|c0_g1_i5	76
TR26678|c0_g2_i2	30
TR26686|c0_g1_i1	40
TR26696|c0_g3_i1	44
TR26711|c1_g2_i1	18
TR26714|c0_g1_i6	24
TR26722|c0_g1_i1	42
TR26726|c0_g2_i1	22
TR26739|c0_g2_i1	110
TR26751|c0_g1_i1	14
TR26758|c0_g1_i1	52
TR26758|c1_g3_i2	32
TR26766|c1_g1_i1	36
TR2677|c0_g1_i1	64
TR26773|c0_g1_i1	16
TR2680|c0_g1_i7	154
TR26813|c2_g1_i2	250
TR26826|c0_g1_i3	46
TR2686|c3_g1_i9	48
TR26873|c3_g4_i4	16
TR26881|c0_g1_i1	20
TR26894|c0_g1_i6	52
TR26907|c0_g1_i1	46
TR26915|c0_g1_i1	38
TR26915|c0_g1_i2	84
TR26922|c1_g1_i8	42
TR26932|c0_g1_i2	68
TR26933|c0_g1_i1	18
TR26935|c0_g1_i7	28
TR2695|c2_g1_i5	32
TR26954|c0_g1_i13	66
TR26974|c0_g1_i1	28
TR26978|c0_g3_i1	26
TR26979|c0_g1_i1	74
TR26983|c0_g1_i2	20
TR26985|c0_g3_i1	10
TR26989|c1_g1_i1	48
TR26990|c0_g2_i1	12
TR27009|c0_g2_i2	40
TR27022|c0_g1_i1	38
TR27042|c0_g1_i2	54
TR27042|c0_g1_i3	58
TR27066|c0_g1_i5	24
TR2707|c0_g1_i1	22
TR27081|c0_g2_i3	30
TR27098|c0_g1_i1	64
TR2710|c0_g1_i1	162
TR27118|c0_g3_i1	18
TR27124|c0_g2_i1	32
TR27125|c0_g8_i1	26
TR27147|c0_g1_i1	58
TR2715|c1_g1_i1	94
TR27156|c0_g1_i1	98
TR27165|c0_g1_i1	38
TR27176|c0_g1_i4	20
TR27183|c1_g1_i3	40
TR27190|c0_g2_i3	32
TR27222|c0_g1_i1	40
TR27227|c0_g10_i2	48
TR27234|c0_g5_i1	34
TR27247|c0_g1_i3	68
TR27258|c0_g2_i4	26
TR27266|c0_g1_i2	22
TR2727|c0_g1_i5	54
TR27287|c0_g1_i1	38
TR27297|c2_g4_i3	48
TR27297|c2_g4_i7	24
TR2730|c0_g7_i1	86
TR27300|c0_g1_i3	28
TR27306|c0_g1_i4	50
TR27316|c0_g1_i2	34
TR27323|c1_g1_i3	36
TR27350|c0_g1_i1	40
TR27375|c0_g3_i2	34
TR27376|c0_g1_i4	40
TR27379|c1_g1_i1	24
TR2738|c0_g2_i1	38
TR27397|c0_g1_i3	26
TR2745|c0_g5_i1	14
TR27453|c0_g1_i1	12
TR2749|c0_g1_i3	66
TR27540|c0_g1_i3	66
TR27573|c0_g2_i1	16
TR27576|c0_g1_i6	36
TR27578|c0_g2_i1	18
TR27579|c0_g1_i1	84
TR27598|c0_g4_i1	18
TR27599|c0_g1_i1	30
TR27612|c0_g8_i5	228
TR27612|c0_g8_i8	258
TR2762|c4_g2_i15	68
TR27645|c0_g1_i6	36
TR27660|c0_g1_i1	34
TR2767|c1_g2_i1	22
TR27670|c0_g1_i3	20
TR27675|c0_g1_i1	62
TR27684|c0_g1_i1	96
TR27711|c0_g2_i4	50
TR27718|c0_g1_i1	34
TR2772|c1_g1_i4	142
TR27730|c0_g1_i1	24
TR27733|c0_g1_i3	12
TR27762|c0_g2_i4	24
TR27765|c0_g3_i2	22
TR27774|c0_g1_i2	296
TR27788|c0_g1_i1	38
TR27793|c0_g1_i1	78
TR27806|c0_g1_i10	76
TR27810|c0_g1_i1	58
TR27813|c0_g1_i4	46
TR27822|c0_g4_i1	24
TR27830|c0_g1_i1	30
TR27835|c0_g2_i2	54
TR27842|c0_g1_i2	22
TR2785|c0_g5_i4	30
TR2785|c0_g5_i6	16
TR2786|c0_g1_i12	70
TR27867|c0_g1_i2	52
TR27877|c0_g4_i3	72
TR27946|c0_g2_i1	30
TR27948|c0_g1_i1	18
TR27960|c0_g1_i3	98
TR27964|c1_g1_i3	38
TR27984|c0_g1_i1	36
TR2800|c0_g1_i1	10
TR28005|c0_g6_i1	166
TR28008|c0_g1_i1	28
TR28013|c0_g1_i1	98
TR28018|c1_g1_i3	20
TR28020|c0_g1_i2	242
TR28020|c0_g1_i3	232
TR28024|c0_g2_i12	28
TR28024|c0_g2_i3	24
TR28028|c0_g1_i1	20
TR2803|c0_g1_i1	28
TR28053|c0_g2_i1	186
TR2807|c0_g1_i9	52
TR28072|c0_g1_i5	28
TR28077|c1_g2_i1	62
TR28081|c0_g1_i3	182
TR2810|c0_g1_i4	28
TR2811|c0_g6_i1	30
TR28126|c1_g1_i1	76
TR28126|c1_g1_i2	76
TR28126|c1_g1_i7	60
TR28137|c0_g1_i1	68
TR28139|c1_g1_i3	86
TR2814|c0_g1_i2	34
TR28147|c0_g1_i2	38
TR28151|c0_g1_i6	40
TR28156|c0_g1_i2	36
TR28156|c0_g1_i3	92
TR28157|c0_g1_i2	18
TR2816|c0_g1_i2	34
TR28166|c0_g1_i7	32
TR28184|c0_g2_i1	26
TR28188|c1_g3_i1	14
TR28203|c0_g1_i4	146
TR28204|c0_g1_i5	32
TR28234|c0_g3_i4	30
TR28245|c0_g1_i1	18
TR28255|c0_g3_i2	96
TR28290|c0_g1_i1	60
TR28291|c0_g4_i1	36
TR28333|c0_g1_i2	48
TR28337|c0_g1_i1	34
TR28349|c1_g2_i1	30
TR28351|c0_g1_i1	50
TR28359|c1_g1_i2	50
TR28371|c0_g1_i1	36
TR28384|c0_g1_i4	54
TR28385|c0_g1_i3	20
TR28397|c0_g3_i2	44
TR2840|c0_g1_i3	90
TR28405|c0_g1_i1	42
TR28405|c0_g1_i2	50
TR28409|c0_g1_i2	76
TR28424|c1_g1_i1	40
TR28441|c1_g1_i1	56
TR2847|c1_g5_i6	76
TR28523|c1_g1_i7	78
TR28535|c1_g1_i1	26
TR28535|c1_g1_i4	32
TR28554|c0_g4_i1	38
TR28560|c0_g1_i3	42
TR28565|c0_g1_i2	20
TR28579|c0_g2_i3	68
TR2858|c0_g1_i1	34
TR28600|c0_g3_i6	54
TR28600|c0_g3_i8	36
TR28606|c1_g1_i1	10
TR28614|c1_g7_i2	42
TR28627|c0_g3_i4	78
TR28646|c0_g1_i6	40
TR28657|c0_g1_i2	34
TR2866|c0_g1_i3	66
TR2866|c0_g1_i4	22
TR28661|c0_g1_i2	28
TR28669|c0_g1_i1	22
TR2867|c0_g1_i1	10
TR28676|c0_g1_i1	70
TR28677|c1_g1_i1	448
TR28685|c2_g5_i3	48
TR28697|c0_g1_i1	54
TR28708|c0_g1_i2	28
TR28712|c0_g1_i1	64
TR28718|c0_g1_i3	32
TR28722|c0_g1_i2	18
TR28741|c0_g1_i2	38
TR28742|c0_g1_i3	40
TR28745|c0_g1_i1	30
TR28745|c1_g3_i1	20
TR28746|c0_g2_i1	32
TR28748|c2_g1_i1	46
TR28761|c0_g1_i1	30
TR28761|c1_g1_i2	38
TR28761|c2_g1_i1	12
TR28762|c0_g1_i1	26
TR28769|c0_g3_i1	28
TR28770|c0_g1_i1	26
TR28802|c2_g2_i10	170
TR28802|c2_g2_i9	40
TR28810|c0_g1_i6	24
TR28845|c0_g1_i2	12
TR28848|c1_g1_i1	42
TR28866|c0_g1_i5	38
TR2888|c0_g4_i2	26
TR28880|c0_g3_i2	90
TR28894|c0_g2_i1	34
TR28897|c0_g1_i7	150
TR28903|c0_g5_i1	36
TR2892|c0_g1_i3	32
TR28922|c0_g1_i5	16
TR28954|c0_g1_i1	32
TR28954|c0_g1_i2	34
TR28959|c0_g1_i1	114
TR28963|c0_g1_i2	74
TR28964|c0_g1_i2	28
TR2897|c0_g1_i3	54
TR28979|c0_g1_i2	46
TR28980|c0_g1_i2	32
TR2899|c3_g1_i2	14
TR2899|c3_g2_i3	32
TR28997|c0_g3_i6	24
TR29003|c0_g1_i1	26
TR29003|c0_g1_i3	36
[truncated: 14,465 more rows]

## Sheet: F1 Specific
TrID	F1
TR10099|c0_g1_i1	30
TR10099|c0_g3_i1	86
TR1017|c0_g1_i1	18
TR10250|c0_g2_i1	24
TR10267|c0_g1_i1	50
TR10427|c0_g3_i1	32
TR10471|c0_g1_i1	26
TR10579|c0_g1_i1	22
TR10677|c0_g1_i2	24
TR10688|c0_g1_i2	24
TR10757|c0_g2_i1	146
TR10798|c0_g1_i1	34
TR10873|c0_g1_i1	202
TR10876|c0_g1_i1	82
TR1100|c0_g1_i1	14
TR11152|c0_g2_i2	40
TR11385|c0_g1_i1	22
TR11478|c0_g1_i1	18
TR11478|c0_g1_i2	20
TR11638|c0_g1_i1	28
TR11649|c0_g2_i1	86
TR11704|c0_g2_i1	72
TR11775|c0_g3_i1	80
TR11778|c1_g1_i1	16
TR1181|c0_g2_i2	34
TR11901|c0_g3_i1	22
TR11950|c0_g1_i1	98
TR1203|c0_g1_i1	14
TR12035|c0_g2_i1	86
TR12042|c0_g1_i1	20
TR12224|c0_g1_i1	90
TR12360|c0_g1_i1	30
TR12415|c0_g4_i1	32
TR12563|c0_g1_i1	20
TR12591|c0_g1_i1	12
TR12609|c0_g1_i1	94
TR12615|c0_g1_i1	30
TR12626|c0_g1_i1	16
TR12688|c0_g1_i1	126
TR12703|c0_g1_i1	12
TR12839|c0_g1_i1	42
TR12901|c0_g1_i1	20
TR1291|c0_g1_i1	30
TR13016|c0_g1_i1	18
TR13038|c1_g1_i1	34
TR13101|c0_g1_i1	244
TR13101|c0_g2_i1	106
TR13374|c0_g1_i1	14
TR13388|c0_g1_i1	34
TR13428|c0_g1_i1	20
TR13442|c0_g1_i1	16
TR13459|c0_g1_i1	20
TR13539|c0_g1_i1	26
TR13547|c0_g1_i1	18
TR13559|c1_g1_i1	50
TR13576|c0_g1_i1	28
TR13576|c0_g2_i1	70
TR13642|c0_g1_i1	36
TR13692|c0_g1_i1	28
TR13743|c0_g1_i1	134
TR13743|c0_g1_i2	50
TR13743|c0_g1_i3	108
TR13758|c0_g1_i1	22
TR13884|c0_g3_i2	22
TR13948|c0_g3_i1	26
TR14081|c0_g1_i1	22
TR1409|c0_g1_i2	128
TR14115|c0_g2_i1	28
TR1423|c0_g1_i1	74
TR14292|c0_g1_i1	24
TR14292|c0_g1_i3	14
TR14337|c0_g1_i1	22
TR14349|c0_g2_i1	262
TR14370|c1_g1_i1	28
TR14448|c0_g2_i1	22
TR1445|c0_g1_i1	18
TR14459|c0_g1_i1	32
TR14459|c0_g2_i1	30
TR1454|c0_g1_i1	50
TR14546|c0_g1_i1	58
TR14613|c0_g2_i1	22
TR14707|c0_g1_i1	22
TR1480|c0_g1_i1	46
TR14824|c0_g2_i1	34
TR14867|c0_g1_i2	36
TR14868|c0_g3_i1	10
TR14968|c0_g1_i1	24
TR15176|c0_g1_i1	16
TR1523|c0_g1_i1	16
TR15302|c0_g1_i1	30
TR1533|c0_g1_i1	20
TR15341|c0_g1_i1	20
TR15446|c0_g1_i1	52
TR15454|c0_g1_i1	26
TR15468|c0_g2_i1	44
TR15587|c0_g1_i1	184
TR15593|c0_g1_i1	18
TR15617|c0_g1_i2	12
TR15638|c1_g1_i1	38
TR15638|c1_g3_i1	68
TR15728|c0_g1_i1	18
TR15735|c0_g1_i1	18
TR15782|c0_g1_i1	70
TR15790|c0_g1_i1	28
TR15928|c0_g1_i1	18
TR15975|c1_g3_i1	56
TR16071|c0_g1_i1	48
TR16115|c1_g3_i1	14
TR16121|c0_g2_i1	42
TR16121|c0_g3_i1	48
TR1613|c0_g1_i1	34
TR1615|c0_g1_i2	26
TR16188|c0_g1_i1	24
TR16201|c0_g1_i4	18
TR16349|c0_g2_i1	14
TR16422|c1_g1_i2	812
TR16470|c0_g1_i1	10
TR16486|c0_g2_i1	24
TR16518|c0_g2_i1	28
TR16558|c0_g1_i1	12
TR1657|c0_g3_i1	26
TR16590|c0_g1_i1	100
TR16590|c0_g1_i2	134
TR16590|c0_g1_i3	126
TR16614|c0_g4_i1	54
TR16725|c0_g2_i1	30
TR16727|c0_g1_i1	78
TR16732|c0_g1_i1	22
TR16739|c0_g1_i1	18
TR16836|c0_g1_i1	42
TR16860|c0_g1_i1	46
TR16897|c0_g1_i1	22
TR16946|c0_g1_i1	48
TR16958|c0_g1_i2	12
TR17043|c0_g2_i1	40
TR1714|c0_g1_i1	150
TR17144|c0_g4_i2	24
TR17226|c0_g2_i1	18
TR17230|c0_g1_i1	28
TR17295|c0_g1_i3	22
TR1731|c0_g3_i1	124
TR17323|c0_g2_i1	32
TR17323|c0_g2_i2	28
TR17349|c0_g1_i1	20
TR17355|c0_g1_i1	60
TR17355|c0_g1_i2	86
TR17355|c0_g1_i3	76
TR17398|c0_g1_i1	12
TR1740|c0_g2_i1	26
TR17419|c0_g1_i1	20
TR17432|c0_g1_i1	68
TR17477|c0_g1_i1	68
TR17485|c0_g2_i1	166
TR17485|c1_g1_i1	682
TR1752|c0_g2_i1	34
TR17596|c0_g1_i1	14
TR17702|c0_g1_i1	22
TR17726|c0_g1_i1	18
TR1774|c0_g2_i1	24
TR17749|c0_g1_i1	510
TR17773|c1_g1_i1	48
TR17778|c0_g1_i1	48
TR17833|c0_g2_i2	34
TR17859|c0_g1_i1	2816
TR17874|c0_g1_i1	36
TR17901|c0_g2_i2	34
TR17905|c0_g2_i1	36
TR17944|c0_g1_i1	42
TR17958|c0_g1_i1	28
TR17986|c1_g1_i1	28
TR17988|c0_g3_i1	14
TR18009|c0_g1_i1	24
TR18057|c1_g1_i1	34
TR18109|c0_g2_i1	32
TR18126|c0_g1_i1	54
TR18153|c0_g1_i4	22
TR1820|c0_g2_i1	16
TR18264|c0_g1_i1	16
TR18278|c0_g1_i1	16
TR18297|c0_g1_i2	14
TR18300|c1_g1_i1	72
TR18321|c0_g1_i1	24
TR18376|c0_g1_i2	164
TR18413|c0_g1_i1	38
TR18425|c0_g1_i1	68
TR18470|c0_g1_i2	84
TR18509|c0_g1_i1	18
TR18521|c0_g1_i1	68
TR18626|c0_g2_i1	56
TR18645|c0_g1_i2	12
TR18686|c0_g1_i1	56
TR18695|c0_g1_i1	40
TR1870|c0_g1_i1	1648
TR18712|c0_g2_i1	14
TR18735|c0_g1_i1	10
TR18756|c0_g1_i2	60
TR18788|c0_g2_i1	16
TR18796|c0_g1_i1	312
TR18806|c0_g1_i1	12
TR18809|c0_g1_i1	12
TR18824|c0_g4_i1	40
TR18830|c0_g1_i2	16
TR18893|c0_g1_i2	58
TR18927|c0_g1_i2	32
TR1901|c0_g1_i1	24
TR19034|c0_g1_i1	16
TR19052|c0_g1_i1	14
TR19073|c0_g1_i1	32
TR1914|c0_g1_i1	84
TR19144|c0_g1_i3	26
TR19148|c0_g1_i1	24
TR19150|c0_g1_i2	50
TR19158|c0_g1_i2	16
TR19205|c0_g5_i1	40
TR19207|c0_g1_i1	684
TR19217|c0_g1_i3	32
TR19239|c0_g2_i1	16
TR19289|c0_g1_i1	12
TR19359|c0_g1_i2	24
TR19365|c0_g1_i1	16
TR19370|c0_g1_i1	32
TR19374|c0_g2_i1	34
TR19406|c0_g1_i1	26
TR19410|c0_g1_i1	66
TR19502|c1_g1_i1	304
TR19502|c1_g2_i1	324
TR19502|c1_g4_i1	86
TR19517|c0_g3_i1	24
TR19528|c0_g1_i1	56
TR19536|c0_g1_i2	4320
TR19539|c0_g1_i1	12
TR19567|c0_g2_i2	28
TR19581|c0_g1_i2	12
TR19607|c0_g1_i1	60
TR19608|c0_g1_i1	10
TR19618|c0_g2_i1	26
TR19632|c0_g1_i1	16
TR19633|c0_g1_i1	62
TR19638|c0_g2_i1	26
TR19651|c0_g1_i1	14
TR19688|c0_g1_i1	110
TR19751|c0_g1_i1	32
TR19758|c0_g1_i1	20
TR19884|c0_g1_i1	132
TR19886|c0_g2_i1	24
TR19887|c0_g1_i1	28
TR19896|c0_g1_i1	18
TR19916|c0_g1_i1	90
TR19928|c0_g2_i1	42
TR19957|c0_g2_i1	24
TR19970|c0_g1_i3	28
TR19996|c0_g1_i4	34
TR19999|c0_g1_i1	354
TR20043|c0_g1_i2	48
TR20055|c0_g1_i1	22
TR20074|c0_g1_i1	440
TR20075|c0_g1_i4	12
TR20078|c0_g1_i1	150
TR20080|c0_g1_i4	40
TR20111|c0_g1_i1	20
TR20124|c0_g1_i1	444
TR20144|c0_g1_i1	62
TR20171|c0_g1_i2	12
TR20179|c1_g1_i3	3596
TR20179|c1_g1_i4	3556
TR20188|c0_g2_i1	18
TR20196|c0_g1_i2	24
TR20236|c0_g1_i1	16
TR20276|c0_g1_i3	82
TR20293|c0_g1_i2	38
TR20326|c0_g3_i1	30
TR20330|c0_g2_i1	52
TR20337|c0_g1_i1	46
TR20366|c0_g1_i1	362
TR20420|c0_g2_i2	58
TR20420|c0_g2_i5	50
TR20430|c0_g2_i1	16
TR20462|c0_g1_i2	48
TR20469|c0_g1_i1	30
TR20488|c0_g1_i1	14
TR20494|c0_g1_i1	32
TR20506|c0_g1_i2	22
TR20506|c0_g1_i3	14
TR20556|c0_g1_i1	96
TR20562|c0_g1_i1	30
TR20611|c0_g1_i1	16
TR20611|c0_g1_i2	14
TR2063|c0_g1_i2	54
TR20678|c0_g1_i1	28
TR20679|c0_g1_i2	16
TR20693|c0_g1_i4	54
TR20693|c0_g1_i5	88
TR20712|c0_g1_i1	16
TR20719|c0_g1_i2	2036
TR20727|c0_g2_i1	24
TR20735|c0_g2_i1	18
TR20735|c0_g2_i2	20
TR20767|c0_g1_i4	28
TR20801|c0_g1_i1	18
TR20804|c0_g1_i2	42
TR20816|c0_g1_i1	26
TR20856|c0_g1_i1	12
TR20880|c0_g3_i1	170
TR20880|c0_g3_i2	154
TR20880|c0_g3_i3	22
TR20892|c0_g1_i3	20
TR20892|c0_g1_i4	26
TR20929|c0_g1_i1	34
TR20932|c0_g1_i1	88
TR20940|c0_g1_i1	48
TR20952|c0_g1_i2	22
TR20959|c0_g1_i1	26
TR20987|c0_g1_i1	30
TR21011|c0_g1_i1	26
TR21036|c0_g1_i1	56
TR21055|c0_g1_i5	34
TR21101|c0_g1_i4	136
TR21111|c0_g1_i1	54
TR21153|c0_g1_i1	20
TR21167|c0_g1_i1	54
TR21174|c0_g1_i1	258
TR21204|c0_g1_i1	18
TR21221|c0_g1_i2	36
TR21222|c0_g1_i1	20
TR21229|c0_g1_i1	26
TR2123|c0_g1_i1	102
TR21282|c1_g1_i1	42
TR21282|c1_g1_i2	20
TR21285|c1_g1_i1	32
TR21293|c0_g1_i1	16
TR21313|c0_g1_i1	140
TR21337|c0_g1_i1	46
TR21346|c0_g1_i1	20
TR21361|c0_g1_i3	96
TR21369|c0_g1_i4	30
TR21392|c0_g1_i1	24
TR21409|c0_g1_i1	20
TR21441|c0_g1_i1	148
TR21441|c0_g1_i2	164
TR21481|c0_g1_i2	60
TR21506|c1_g1_i1	2288
TR21506|c1_g2_i1	502
TR2157|c0_g1_i4	30
TR21619|c0_g1_i1	96
TR2164|c0_g1_i3	56
TR21647|c0_g1_i2	16
TR2167|c0_g1_i1	216
TR2168|c0_g1_i1	446
TR2168|c0_g1_i3	160
TR21693|c0_g1_i3	42
TR21708|c0_g1_i4	36
TR21714|c0_g1_i1	26
TR2172|c0_g2_i7	22
TR21732|c0_g1_i3	36
TR21757|c0_g1_i2	288
TR2178|c6_g4_i5	16
TR21793|c0_g1_i1	20
TR21800|c0_g1_i2	730
TR2181|c0_g1_i2	66
TR21832|c0_g1_i1	24
TR21832|c0_g1_i2	224
TR21832|c0_g1_i3	284
TR2184|c0_g4_i1	62
TR2184|c0_g4_i10	104
TR2184|c0_g4_i11	186
TR2184|c0_g4_i2	250
TR21870|c0_g1_i2	46
TR2188|c0_g1_i2	72
TR21883|c0_g1_i2	36
TR21891|c0_g1_i1	50
TR21891|c0_g1_i2	98
TR21891|c0_g1_i3	52
TR21891|c0_g1_i4	110
TR21891|c0_g1_i5	84
TR21891|c0_g1_i6	108
TR21891|c0_g1_i7	86
TR21891|c0_g1_i8	96
TR21939|c0_g3_i1	22
TR21965|c0_g2_i1	44
TR2198|c0_g2_i3	96
TR2201|c0_g2_i1	34
TR2202|c0_g1_i2	38
TR22023|c0_g1_i2	22
TR22023|c0_g2_i2	54
TR22024|c0_g1_i1	68
TR22041|c0_g2_i1	22
TR2209|c0_g2_i1	54
TR2209|c0_g3_i1	52
TR2209|c0_g3_i5	26
TR22133|c0_g1_i1	32
TR2214|c3_g3_i1	530
TR2214|c3_g3_i2	32
TR2214|c3_g5_i1	120
TR22141|c0_g1_i2	20
TR2216|c1_g4_i1	108
TR2216|c1_g4_i3	90
TR2216|c1_g4_i6	20
TR2216|c1_g4_i8	160
TR22163|c0_g1_i1	42
TR2217|c0_g1_i3	38
TR2217|c1_g1_i4	126
TR22171|c1_g2_i1	24
TR2218|c1_g4_i12	62
TR2218|c1_g4_i2	80
TR2218|c1_g4_i6	64
TR2218|c1_g4_i7	72
TR22200|c0_g1_i1	2662
TR22200|c0_g1_i2	5292
TR22226|c0_g1_i1	60
TR2224|c0_g1_i3	84
TR22258|c0_g1_i2	48
TR2227|c2_g1_i4	26
TR2228|c0_g1_i1	32
TR2228|c0_g1_i3	154
TR2228|c0_g2_i1	246
TR2228|c0_g3_i1	100
TR22287|c0_g1_i1	736
TR22289|c0_g1_i1	2070
TR22297|c0_g1_i1	34
TR22306|c0_g2_i1	148
TR2232|c0_g1_i2	54
TR2233|c2_g1_i1	46
TR2233|c3_g1_i3	138
TR22335|c0_g1_i1	26
TR2234|c0_g2_i1	48
TR22342|c0_g3_i1	30
TR2236|c0_g1_i3	176
TR22364|c0_g1_i1	14
TR22365|c0_g1_i1	30
TR22365|c0_g1_i2	40
TR22365|c0_g3_i1	18
TR22373|c0_g1_i1	88
TR22373|c0_g1_i2	62
TR2239|c0_g2_i1	130
TR22412|c0_g2_i1	32
TR22416|c1_g1_i2	166
TR22425|c0_g1_i1	112
TR2244|c1_g1_i3	188
TR22442|c0_g1_i1	322
TR2245|c6_g1_i3	102
TR2245|c7_g2_i1	46
TR22485|c0_g1_i1	158
TR2250|c2_g2_i5	44
TR22516|c0_g1_i2	70
TR22526|c0_g2_i1	32
TR22536|c0_g2_i1	52
TR22537|c0_g1_i1	16
TR22540|c0_g3_i3	22
TR2255|c1_g1_i1	46
TR2255|c1_g2_i1	82
TR2255|c9_g4_i5	34
TR22557|c0_g2_i1	16
TR22561|c0_g1_i1	12
TR2258|c1_g1_i1	62
TR22591|c0_g1_i2	22
TR2260|c0_g1_i1	34
TR2261|c0_g3_i3	156
TR22616|c0_g1_i1	56
TR2262|c0_g1_i2	168
TR22621|c1_g1_i2	14
TR2263|c1_g1_i4	84
TR2263|c1_g1_i9	16
TR22654|c0_g1_i1	22
TR22657|c0_g3_i1	54
TR22665|c0_g1_i1	34
TR22691|c1_g1_i2	72
TR22717|c0_g1_i1	28
TR2273|c1_g1_i1	104
TR2275|c0_g3_i1	56
TR22759|c0_g1_i1	74
TR22759|c0_g1_i2	66
TR22773|c0_g1_i1	22
TR2278|c1_g1_i3	22
TR22783|c0_g1_i6	22
TR2280|c0_g4_i1	1430
TR22805|c0_g1_i2	290
TR22805|c0_g1_i3	58
TR2282|c0_g3_i1	24
TR2283|c0_g2_i2	20
TR22846|c0_g2_i1	70
TR22855|c0_g1_i4	34
TR22875|c0_g3_i1	26
TR22877|c0_g1_i1	60
TR22877|c0_g1_i2	38
TR22879|c0_g1_i1	20
TR22880|c0_g1_i1	72
TR22881|c0_g1_i2	24
TR2290|c0_g1_i1	42
TR22909|c0_g1_i1	90
TR22928|c0_g1_i2	26
TR2294|c0_g3_i1	18
TR2294|c0_g4_i4	40
TR22956|c0_g1_i1	88
TR2297|c0_g1_i1	22
TR2298|c0_g1_i4	126
TR22987|c0_g1_i3	56
TR22987|c0_g1_i4	64
TR22987|c0_g1_i5	48
TR2300|c0_g4_i1	42
TR23014|c0_g1_i1	68
TR23020|c0_g1_i1	34
TR23029|c0_g2_i1	46
TR2303|c1_g2_i1	24
TR2303|c1_g3_i6	610
TR23034|c0_g1_i1	32
TR2304|c0_g2_i1	20
TR23045|c0_g1_i2	38
TR2305|c0_g1_i5	134
TR23059|c0_g1_i2	42
TR2306|c0_g1_i1	18
TR2308|c4_g2_i1	44
TR2308|c4_g2_i2	18
TR23091|c0_g1_i1	80
TR23094|c0_g1_i2	72
TR23098|c0_g1_i2	54
TR23098|c0_g1_i3	110
TR23124|c0_g1_i1	150
TR23126|c0_g1_i1	158
TR23144|c0_g1_i1	56
TR23156|c0_g1_i1	30
TR23159|c0_g1_i1	36
TR23169|c1_g1_i1	34
TR23186|c2_g3_i1	92
TR2319|c2_g1_i1	42
TR2319|c2_g3_i1	52
TR2319|c2_g4_i2	26
TR2319|c2_g6_i6	18
TR23194|c0_g3_i1	18
TR2322|c0_g1_i4	186
TR2322|c0_g1_i8	46
TR23226|c0_g1_i1	72
TR23226|c0_g1_i2	64
TR2323|c1_g1_i1	70
TR2323|c1_g1_i6	64
TR23247|c0_g3_i1	42
TR2326|c0_g1_i1	96
TR2326|c0_g1_i5	72
TR2326|c0_g1_i9	50
TR2327|c0_g2_i2	126
TR2327|c0_g6_i1	16
TR2328|c0_g1_i3	18
TR2328|c0_g1_i5	22
TR2329|c0_g3_i7	192
TR2330|c0_g1_i3	50
TR23310|c0_g2_i1	22
TR2337|c0_g1_i1	68
TR23371|c0_g1_i1	44
TR23372|c0_g3_i1	22
TR23388|c0_g1_i1	116
TR2340|c0_g1_i3	380
TR23414|c0_g1_i4	54
TR23423|c0_g1_i1	34
TR23431|c0_g1_i1	64
TR23464|c0_g4_i1	14
TR23466|c0_g2_i1	40
TR2347|c0_g2_i3	50
TR23479|c0_g2_i1	72
TR2348|c0_g1_i2	12
TR2349|c0_g1_i3	70
TR2349|c0_g2_i1	12
TR23496|c0_g1_i3	34
TR2350|c0_g2_i2	748
TR23507|c0_g1_i1	22
TR23508|c0_g1_i1	32
TR23517|c0_g1_i1	54
TR23538|c0_g1_i1	24
TR2355|c1_g3_i4	16
TR23560|c0_g1_i1	240
TR23581|c0_g1_i1	32
TR23584|c0_g1_i3	34
TR2360|c0_g1_i1	22
TR2360|c0_g1_i10	50
TR23607|c0_g1_i1	52
TR2361|c2_g1_i3	2500
TR2361|c2_g1_i5	6338
TR2361|c2_g1_i6	6640
TR2361|c2_g1_i8	1206
TR23612|c0_g1_i2	32
TR23628|c0_g1_i1	72
TR2363|c1_g1_i2	26
TR2363|c1_g1_i3	46
TR2363|c1_g1_i7	56
TR23646|c0_g1_i1	172
TR23646|c0_g1_i2	164
TR23650|c1_g2_i1	60
TR2366|c0_g1_i1	22
TR2366|c0_g2_i3	44
TR23660|c0_g1_i1	24
TR23666|c0_g1_i1	46
TR23670|c0_g1_i1	36
TR23673|c0_g1_i4	80
TR23684|c0_g1_i1	52
TR23687|c0_g2_i1	40
TR23693|c0_g4_i7	94
TR23694|c0_g1_i1	14
TR23694|c0_g1_i2	64
TR23706|c0_g2_i1	36
TR23706|c1_g1_i1	56
TR23706|c1_g1_i3	42
TR23707|c1_g1_i1	100
TR2371|c0_g2_i2	78
TR2371|c0_g2_i4	72
TR23713|c1_g2_i1	104
TR23719|c0_g1_i1	32
TR23730|c0_g2_i2	34
TR23735|c0_g1_i1	18
TR23749|c0_g1_i1	12
TR23757|c0_g1_i1	40
TR23763|c1_g1_i1	38
TR23764|c0_g1_i3	76
TR23774|c0_g1_i1	92
TR23774|c0_g1_i2	62
TR2379|c1_g1_i4	178
TR23802|c0_g1_i1	56
TR23804|c0_g1_i3	36
TR2383|c0_g2_i1	1078
TR23832|c1_g1_i2	134
TR23833|c0_g4_i1	20
TR2384|c0_g1_i1	26
TR2384|c0_g3_i6	18
TR23843|c0_g4_i1	18
TR2385|c0_g3_i3	32
TR23850|c0_g2_i2	2314
TR23850|c0_g3_i1	560
TR23852|c0_g1_i2	52
TR23856|c0_g1_i1	150
TR2387|c0_g2_i1	28
TR23887|c0_g3_i3	62
TR23889|c0_g2_i1	18
TR2390|c0_g1_i2	264
TR2390|c0_g2_i1	38
TR2390|c0_g6_i2	40
TR23925|c0_g1_i1	26
TR23928|c0_g1_i3	52
TR23928|c0_g1_i4	88
TR2394|c0_g2_i2	30
TR2394|c0_g2_i6	94
TR2395|c0_g2_i2	48
TR23950|c1_g1_i1	52
TR23974|c0_g1_i3	44
TR23978|c0_g1_i1	18
TR23991|c0_g1_i1	40
TR23991|c0_g2_i1	26
TR23991|c0_g3_i2	20
TR24017|c0_g1_i1	20
TR2402|c1_g1_i3	40
TR2402|c1_g1_i7	72
TR2402|c1_g1_i8	62
TR24032|c0_g1_i1	20
TR24036|c0_g1_i1	12
TR24039|c0_g1_i1	376
TR24047|c1_g1_i1	50
TR24047|c1_g1_i3	88
TR24063|c0_g1_i2	30
TR24068|c0_g2_i2	18
TR2407|c0_g1_i1	108
TR24109|c0_g1_i2	38
TR24111|c0_g1_i1	292
TR2412|c0_g1_i2	124
TR24147|c0_g1_i2	68
TR24150|c0_g1_i1	50
TR24171|c12_g1_i3	18
TR24175|c0_g1_i1	54
TR24175|c0_g1_i3	34
TR2418|c0_g1_i3	48
TR24189|c0_g2_i10	184
TR24189|c0_g2_i2	150
TR24189|c0_g2_i4	202
TR24189|c0_g2_i7	168
TR24189|c0_g2_i9	194
TR24194|c0_g1_i2	16
TR2420|c2_g2_i1	76
TR2420|c2_g2_i3	120
TR2420|c2_g2_i4	36
TR2421|c0_g1_i1	38
TR24214|c1_g1_i1	28
TR24216|c1_g2_i2	108
TR24216|c1_g2_i3	68
TR24218|c0_g1_i1	24
TR24230|c0_g1_i1	20
TR24242|c0_g1_i1	22
TR24244|c0_g1_i1	44
TR24258|c0_g1_i1	30
TR2427|c0_g1_i4	52
TR24289|c0_g1_i3	42
TR24289|c0_g3_i1	24
TR2429|c0_g2_i2	356
TR24299|c0_g1_i2	200
TR24311|c0_g1_i1	20
TR24317|c0_g1_i1	58
TR24321|c0_g1_i1	112
TR24324|c0_g1_i3	10
TR24351|c0_g1_i5	102
TR24351|c0_g1_i6	18
TR24352|c0_g1_i2	34
TR24373|c0_g1_i2	30
TR24377|c0_g2_i3	388
TR24382|c0_g1_i2	266
TR24392|c0_g2_i1	20
TR2442|c1_g1_i2	24
TR2442|c1_g1_i7	154
TR2442|c1_g1_i8	126
TR2442|c1_g1_i9	192
TR24425|c0_g1_i4	56
TR2443|c1_g3_i1	78
TR2445|c0_g1_i5	402
TR2446|c0_g2_i1	26
TR2449|c0_g1_i1	62
TR24511|c0_g1_i2	78
TR24524|c0_g1_i1	22
TR24553|c0_g1_i5	34
TR24557|c0_g1_i1	32
TR24557|c0_g1_i3	38
TR24569|c0_g1_i1	38
TR24575|c0_g1_i3	56
TR24577|c0_g2_i3	36
TR24583|c0_g1_i2	1530
TR24584|c0_g1_i1	28
TR24584|c0_g1_i2	32
TR24588|c1_g4_i1	60
TR24593|c0_g1_i6	160
TR24609|c0_g2_i1	56
TR2461|c1_g2_i1	58
TR2461|c1_g2_i10	74
TR2461|c1_g2_i2	104
TR2461|c1_g2_i7	36
TR2461|c1_g2_i8	92
TR2461|c1_g3_i1	24
TR24614|c0_g2_i3	22
TR2462|c0_g1_i1	88
TR24623|c0_g1_i1	20
TR24625|c0_g1_i4	24
TR24629|c0_g1_i1	234
TR24629|c0_g1_i2	94
TR2464|c0_g1_i1	134
TR24653|c0_g1_i2	514
TR24662|c0_g1_i2	30
TR24663|c0_g1_i3	412
TR24686|c0_g1_i2	14
TR24687|c0_g1_i6	60
TR2469|c0_g1_i2	30
TR2470|c1_g6_i2	14
TR24705|c1_g1_i1	64
TR24740|c0_g1_i2	28
TR24740|c0_g1_i3	72
TR24760|c0_g1_i1	34
TR24771|c0_g1_i1	562
TR24771|c0_g2_i1	270
TR24775|c0_g1_i1	40
TR2480|c0_g1_i4	44
TR24812|c0_g1_i1	30
TR24821|c0_g1_i1	82
TR24821|c0_g1_i2	100
TR24843|c0_g1_i1	18
TR24853|c0_g1_i1	76
TR24881|c0_g1_i1	22
TR24889|c0_g2_i1	18
TR24906|c0_g1_i5	80
TR24908|c0_g1_i1	28
TR24913|c0_g2_i3	32
TR24914|c0_g2_i1	16
TR24916|c0_g1_i3	72
TR24916|c0_g1_i4	38
TR24919|c1_g1_i2	58
TR24922|c0_g1_i1	162
TR24928|c0_g2_i1	74
TR24936|c0_g1_i1	194
TR24948|c0_g1_i3	36
TR2495|c1_g1_i2	170
TR2495|c1_g1_i5	296
TR24974|c0_g1_i1	18
TR24983|c0_g1_i2	38
TR24986|c0_g1_i1	26
TR2499|c1_g1_i2	104
TR24998|c0_g1_i1	166
TR25000|c0_g1_i10	58
TR25002|c0_g2_i1	34
TR2501|c1_g1_i7	246
TR2501|c1_g1_i8	214
TR2501|c1_g1_i9	144
TR2501|c1_g3_i1	44
TR25010|c0_g1_i1	86
TR25015|c0_g1_i1	70
TR25028|c0_g1_i3	46
TR25029|c0_g2_i1	170
TR25037|c0_g1_i1	28
TR2504|c0_g5_i1	12
TR25042|c0_g2_i2	22
TR25059|c0_g1_i2	166
TR25061|c0_g2_i1	112
TR25065|c0_g3_i1	10
TR25066|c0_g2_i1	36
TR25069|c0_g1_i1	12
TR2507|c0_g2_i2	34
TR25078|c1_g1_i2	50
TR25078|c1_g1_i5	40
TR25093|c1_g2_i2	36
TR25099|c0_g1_i1	36
TR2510|c0_g1_i1	208
TR2510|c0_g2_i3	324
TR2510|c0_g5_i1	42
TR25102|c0_g1_i3	26
TR25119|c0_g1_i3	192
TR25128|c0_g1_i1	10
TR2514|c0_g1_i1	20
TR2514|c1_g2_i1	66
TR25144|c0_g2_i1	22
TR25152|c0_g1_i1	178
TR25159|c0_g1_i1	20
TR25160|c0_g1_i3	34
TR25167|c1_g1_i1	128
TR2517|c0_g1_i8	46
TR25171|c1_g1_i4	242
TR25181|c0_g1_i2	38
TR25185|c0_g1_i2	28
TR2521|c0_g5_i1	28
TR2521|c0_g7_i1	118
TR25221|c0_g1_i1	452
TR25221|c0_g1_i2	408
TR25223|c0_g1_i1	48
TR25227|c0_g1_i4	44
TR2523|c0_g2_i1	1084
TR25238|c0_g1_i1	58
TR25239|c0_g1_i1	196
TR25249|c0_g4_i1	88
TR2525|c0_g1_i4	48
TR25258|c0_g1_i2	110
TR25259|c0_g1_i1	268
TR25259|c0_g1_i5	118
TR2526|c0_g2_i1	306
TR2526|c0_g2_i2	270
TR25263|c0_g1_i5	22
TR25264|c0_g1_i1	62
TR25275|c0_g1_i1	30
TR25277|c1_g3_i2	40
TR25289|c0_g1_i2	36
TR25301|c0_g2_i1	68
TR25302|c0_g1_i3	42
TR25309|c0_g2_i1	12
TR25322|c0_g1_i2	292
TR25335|c0_g1_i1	20
TR25343|c1_g1_i1	66
TR25343|c1_g1_i4	18
TR25347|c0_g1_i1	40
TR25349|c0_g1_i3	38
TR2535|c0_g1_i6	28
TR25366|c0_g1_i2	32
TR25371|c0_g1_i1	56
TR25374|c0_g2_i3	16
TR25376|c0_g1_i1	304
TR25379|c0_g1_i1	16
TR2539|c0_g3_i1	26
TR2539|c0_g3_i2	50
TR2542|c1_g1_i1	58
TR2542|c1_g2_i2	812
TR2542|c1_g7_i1	224
TR2544|c0_g1_i7	120
TR2545|c0_g2_i5	806
TR25466|c0_g1_i1	28
TR2547|c0_g2_i2	406
TR2547|c0_g2_i4	1338
TR2548|c0_g3_i3	340
TR25491|c0_g1_i1	282
TR25506|c2_g1_i3	68
TR25506|c2_g1_i6	128
TR25506|c2_g2_i2	94
TR25512|c0_g1_i4	70
TR25528|c0_g1_i1	94
TR25528|c0_g1_i5	32
TR2553|c0_g1_i1	60
TR25537|c0_g1_i2	20
TR25540|c0_g2_i1	46
TR25549|c0_g1_i1	60
TR25554|c0_g1_i4	316
TR25560|c0_g1_i1	30
TR25567|c0_g1_i1	22
TR25569|c0_g1_i1	12
TR25573|c1_g1_i3	284
TR2559|c1_g1_i1	46
TR2559|c2_g3_i2	18
TR25597|c0_g1_i1	22
TR2560|c0_g1_i1	12
TR25607|c0_g1_i2	30
TR25618|c0_g1_i2	22
TR25619|c0_g1_i4	82
TR25621|c0_g2_i2	34
TR2563|c0_g3_i1	106
TR2564|c0_g1_i7	200
TR25648|c0_g1_i4	138
TR25653|c0_g1_i2	48
TR2566|c0_g1_i2	564
TR2570|c0_g1_i8	14
TR25701|c4_g2_i1	16
TR25707|c0_g1_i1	52
TR25707|c0_g1_i2	86
TR2571|c1_g1_i2	70
TR2571|c1_g2_i1	12
TR2572|c1_g1_i1	10
TR25733|c0_g2_i2	26
TR25734|c0_g1_i2	22
TR25741|c0_g1_i4	48
TR2575|c0_g9_i1	84
TR25751|c1_g1_i4	486
TR2576|c0_g2_i5	66
TR2577|c0_g3_i1	282
TR2578|c1_g1_i3	78
TR25780|c0_g1_i1	82
TR25781|c0_g1_i1	62
TR25793|c0_g1_i1	82
TR25793|c0_g1_i3	80
TR2580|c0_g1_i7	274
TR2581|c0_g1_i8	64
TR25812|c0_g1_i1	64
TR25812|c0_g3_i2	118
TR25813|c0_g1_i3	46
TR25814|c1_g1_i1	28
TR25814|c1_g1_i5	32
TR25824|c0_g1_i1	26
TR25828|c0_g2_i6	26
TR25833|c0_g1_i3	30
TR2584|c0_g1_i1	156
TR2584|c0_g1_i4	84
TR25849|c0_g3_i1	162
TR2585|c0_g1_i1	40
TR25862|c0_g2_i1	54
TR25882|c0_g2_i3	54
TR25888|c0_g1_i2	54
TR25889|c0_g1_i1	68
TR2589|c0_g3_i1	16
TR25899|c0_g2_i1	46
TR25900|c0_g1_i2	18
TR25904|c0_g1_i2	30
TR25912|c0_g1_i3	102
TR2592|c0_g1_i2	138
TR25922|c0_g4_i2	494
TR2593|c1_g1_i4	386
TR2593|c1_g3_i1	42
TR25932|c0_g1_i1	56
TR2595|c0_g1_i2	96
TR25964|c1_g1_i1	12
TR25969|c0_g1_i3	110
TR2597|c0_g1_i3	12
TR25971|c0_g1_i5	152
TR2600|c0_g1_i10	78
TR26018|c0_g1_i1	20
TR26030|c0_g1_i1	24
TR2605|c0_g2_i1	40
TR2608|c0_g1_i4	52
TR26086|c0_g1_i1	268
TR26086|c0_g1_i3	240
TR26093|c1_g1_i1	18
TR2611|c0_g1_i2	26
TR26123|c0_g1_i3	130
TR26123|c0_g1_i4	102
TR26126|c0_g1_i2	48
TR26128|c1_g1_i2	18
TR26128|c1_g1_i5	60
TR26131|c0_g1_i1	76
TR26131|c0_g2_i1	62
TR26133|c0_g1_i2	24
TR26139|c1_g1_i1	284
TR26139|c1_g2_i1	38
TR26150|c0_g1_i1	40
TR26154|c0_g1_i6	24
TR26156|c0_g4_i4	62
TR26156|c0_g4_i5	96
TR26156|c0_g4_i6	126
TR26156|c0_g4_i9	62
TR26169|c0_g3_i2	14
TR2618|c0_g2_i1	40
TR26187|c0_g2_i2	14
TR26193|c0_g1_i3	62
TR26194|c0_g1_i3	26
TR2620|c2_g2_i1	224
TR26200|c0_g1_i1	32
TR26204|c0_g1_i4	80
TR26213|c0_g1_i1	486
TR26213|c0_g1_i5	428
TR26216|c0_g2_i1	34
TR2622|c0_g1_i1	30
TR26254|c0_g2_i1	72
TR26254|c1_g1_i1	60
TR26261|c0_g1_i2	30
TR26264|c0_g1_i1	42
TR26269|c0_g1_i1	12
TR26269|c0_g1_i2	58
TR26279|c1_g1_i1	38
TR26286|c0_g2_i3	24
TR26286|c0_g2_i4	48
TR26287|c1_g2_i1	18
TR26291|c0_g3_i7	36
TR26294|c2_g1_i2	20
TR26296|c0_g1_i1	30
TR26297|c0_g2_i1	74
TR26298|c0_g1_i1	62
TR26303|c0_g1_i2	116
TR26330|c1_g3_i1	32
TR26330|c1_g7_i1	108
TR26330|c1_g7_i2	96
TR26330|c1_g7_i5	98
TR26330|c1_g7_i7	86
TR26333|c0_g1_i1	72
TR26349|c0_g1_i1	152
TR26351|c0_g1_i2	60
TR26357|c0_g1_i1	90
TR26357|c0_g2_i1	18
TR26357|c1_g1_i1	40
TR26358|c0_g3_i2	26
TR26362|c1_g1_i1	36
TR26362|c1_g1_i6	68
TR26363|c0_g3_i3	40
TR26369|c1_g5_i3	44
TR26387|c0_g1_i7	38
TR26387|c0_g2_i2	84
TR26388|c0_g1_i1	612
TR2639|c0_g2_i1	16
TR26391|c0_g1_i1	12
TR26400|c0_g1_i1	106
TR26403|c0_g1_i3	30
TR26404|c0_g1_i1	30
TR26410|c0_g2_i6	152
TR26413|c0_g3_i1	52
TR26415|c0_g1_i3	30
TR26457|c0_g4_i2	26
TR26465|c1_g3_i1	50
TR26475|c0_g1_i1	2614
TR2648|c0_g3_i3	212
TR26481|c0_g1_i2	20
TR26481|c0_g1_i7	32
TR2652|c2_g1_i1	24
TR2653|c2_g1_i3	746
TR26535|c0_g3_i2	44
TR26538|c0_g1_i2	52
TR2655|c0_g5_i10	16
TR2655|c0_g5_i4	16
TR26556|c1_g1_i1	68
TR26556|c1_g1_i2	72
TR26567|c0_g1_i2	16
TR26568|c0_g1_i2	120
TR26570|c0_g1_i1	16
TR26573|c0_g1_i2	28
TR26578|c1_g1_i1	18
TR26578|c2_g1_i1	174
TR26579|c0_g1_i1	26
TR26584|c5_g1_i13	28
TR2659|c0_g1_i3	30
TR26591|c0_g1_i3	46
TR26600|c0_g1_i2	776
TR2661|c0_g4_i1	22
TR26612|c0_g1_i2	240
TR26621|c0_g2_i3	28
TR2663|c0_g1_i1	118
TR26637|c0_g1_i2	38
TR2664|c2_g1_i2	94
TR2664|c2_g3_i2	22
TR26650|c0_g1_i1	640
TR26650|c0_g4_i2	908
TR26657|c0_g1_i1	110
TR2666|c1_g2_i6	54
TR2666|c2_g1_i1	236
TR26660|c0_g1_i2	54
TR26660|c0_g2_i1	14
TR26661|c0_g1_i1	40
TR26674|c2_g3_i1	38
TR26683|c0_g1_i8	18
TR26683|c0_g2_i2	162
TR26688|c0_g2_i1	18
TR2669|c1_g1_i2	42
TR2669|c1_g1_i6	48
TR2669|c2_g1_i1	22
TR2669|c2_g8_i4	82
TR26692|c0_g1_i1	34
TR26697|c0_g1_i1	34
TR26700|c0_g1_i1	714
TR26702|c0_g2_i1	36
TR26707|c0_g2_i3	20
TR26714|c0_g1_i2	38
TR26722|c0_g2_i1	32
TR2673|c2_g3_i1	38
TR26731|c0_g2_i1	40
TR26739|c0_g1_i2	492
TR26747|c0_g1_i2	162
TR2675|c0_g1_i1	40
TR2675|c0_g2_i3	1020
TR2675|c0_g4_i1	112
TR26755|c0_g1_i1	74
TR26759|c0_g1_i1	64
TR26763|c0_g2_i2	64
TR26768|c0_g1_i3	42
TR26769|c0_g3_i2	246
TR26784|c0_g1_i1	40
TR26800|c1_g1_i3	38
TR26806|c0_g1_i2	60
TR26809|c0_g1_i1	14
TR2681|c0_g1_i3	18
TR26810|c1_g1_i1	52
TR26810|c1_g1_i3	218
TR26817|c0_g1_i5	80
TR26818|c0_g1_i2	40
TR26818|c0_g1_i3	64
TR26820|c0_g1_i1	38
TR26821|c1_g1_i3	32
TR26826|c0_g1_i6	40
TR26835|c0_g1_i3	18
TR26837|c0_g1_i2	346
TR26837|c0_g1_i3	148
TR26845|c0_g2_i3	40
TR2685|c0_g1_i3	36
TR26856|c0_g1_i6	36
TR2686|c3_g1_i7	24
TR26868|c0_g1_i2	730
TR26868|c0_g2_i1	248
TR26875|c0_g1_i1	132
TR26878|c0_g1_i7	54
TR26880|c0_g1_i3	36
TR26885|c0_g1_i1	18
TR26885|c0_g2_i1	46
TR26887|c1_g1_i6	122
TR2690|c0_g1_i3	156
TR26910|c0_g1_i2	44
TR26929|c0_g2_i1	40
TR2693|c1_g1_i3	32
TR26930|c0_g1_i1	72
TR26935|c0_g1_i3	28
TR26936|c0_g1_i3	46
TR26939|c0_g1_i2	40
TR2694|c2_g2_i1	48
TR2694|c2_g2_i7	58
TR2697|c0_g1_i2	96
TR26970|c0_g1_i1	190
TR26971|c0_g1_i1	46
TR26978|c0_g3_i2	24
TR2698|c0_g1_i8	374
TR2698|c0_g1_i9	416
TR26980|c0_g2_i2	18
TR26981|c0_g1_i1	38
TR26984|c0_g1_i2	182
TR26985|c0_g6_i1	28
TR2699|c1_g10_i1	24
TR2699|c1_g5_i4	52
TR2699|c1_g6_i1	54
TR2699|c1_g6_i3	42
TR2699|c1_g6_i8	44
TR26999|c0_g2_i1	30
TR27002|c1_g1_i6	36
TR27006|c0_g2_i1	20
TR27008|c0_g1_i1	38
TR27009|c0_g1_i1	20
TR2701|c1_g2_i1	116
TR2702|c0_g1_i4	148
TR27032|c0_g3_i1	520
TR27037|c0_g1_i3	30
TR27040|c0_g1_i2	120
TR27051|c0_g1_i1	54
TR27061|c0_g1_i4	316
TR27063|c0_g1_i1	160
TR27063|c0_g1_i2	30
TR27064|c0_g1_i3	334
TR2707|c0_g3_i1	112
TR27079|c0_g2_i2	20
TR27083|c0_g1_i9	3632
TR2709|c0_g3_i2	134
TR27091|c0_g2_i1	18
TR27094|c0_g3_i1	32
TR27094|c0_g3_i2	62
TR27100|c0_g1_i1	16
TR27102|c0_g1_i3	14
TR27121|c0_g1_i3	40
TR27124|c0_g1_i1	50
TR27125|c0_g4_i1	36
TR27127|c0_g1_i1	88
TR27127|c0_g1_i2	72
TR27131|c0_g1_i1	360
TR27139|c0_g1_i1	36
TR27139|c0_g2_i1	14
TR27143|c0_g1_i1	120
TR27143|c0_g1_i2	142
TR27154|c0_g1_i1	14
TR27164|c0_g2_i1	26
TR27165|c0_g1_i3	54
TR27168|c0_g1_i1	84
TR27169|c0_g1_i1	60
TR27171|c0_g1_i1	20
TR27171|c0_g4_i4	48
TR27182|c0_g1_i2	54
TR27193|c0_g3_i2	24
TR2720|c1_g1_i2	104
TR27218|c0_g1_i3	546
TR27234|c0_g3_i1	250
TR27234|c0_g6_i1	16
TR27239|c0_g1_i1	278
TR2724|c0_g1_i1	152
TR2724|c0_g1_i2	120
TR27243|c0_g1_i4	110
TR27248|c1_g1_i2	34
TR27249|c0_g1_i1	52
TR27249|c0_g1_i3	30
TR27253|c0_g1_i1	30
TR27253|c0_g1_i3	48
TR27277|c1_g1_i1	26
TR27279|c1_g1_i1	38
TR27281|c0_g1_i1	1174
TR27287|c0_g2_i1	34
TR27291|c0_g1_i3	28
TR27296|c0_g3_i1	18
TR27298|c0_g3_i1	28
TR27298|c0_g5_i1	80
TR27307|c1_g1_i2	112
TR27309|c0_g1_i3	36
TR2731|c0_g1_i1	14
TR2731|c0_g7_i1	22
TR27319|c0_g2_i1	60
TR27322|c0_g1_i4	98
TR27324|c0_g2_i1	16
TR27327|c0_g1_i1	174
TR27331|c0_g2_i1	20
TR27337|c0_g1_i2	94
TR27339|c0_g1_i2	42
TR2734|c0_g1_i5	38
TR27359|c0_g1_i2	64
TR27366|c0_g1_i1	36
TR27368|c0_g1_i2	80
TR27377|c0_g1_i2	428
TR27380|c0_g1_i3	22
TR27380|c0_g1_i5	28
TR27383|c0_g1_i3	42
TR27392|c0_g1_i1	84
TR27396|c0_g3_i1	34
TR27400|c0_g1_i2	90
TR27400|c0_g3_i3	124
TR27411|c0_g1_i5	520
TR27414|c0_g1_i1	20
TR2745|c0_g2_i1	128
TR2747|c0_g1_i3	216
TR2747|c0_g1_i4	72
TR27470|c0_g2_i2	364
TR27470|c0_g2_i4	186
TR27470|c0_g2_i5	246
TR27476|c0_g1_i3	96
TR27481|c0_g1_i1	30
TR27484|c0_g1_i2	44
TR27496|c1_g2_i4	84
TR27497|c2_g1_i1	14
TR2750|c1_g1_i1	20
TR27503|c1_g2_i1	32
TR27512|c0_g2_i1	84
TR27527|c0_g2_i1	20
TR27529|c3_g1_i10	44
TR27529|c3_g1_i11	18
TR27529|c3_g1_i5	40
TR27529|c3_g1_i7	34
TR27529|c3_g1_i8	114
TR27529|c3_g1_i9	48
TR27530|c1_g7_i1	34
TR27538|c0_g3_i10	36
TR27538|c0_g3_i11	30
TR2755|c1_g1_i3	18
TR27554|c0_g1_i2	134
TR27556|c0_g1_i4	66
TR27559|c0_g1_i2	98
TR2756|c2_g1_i1	14
TR2756|c4_g4_i10	34
TR27574|c1_g1_i1	360
TR27585|c0_g1_i1	44
TR27589|c0_g1_i2	84
TR2759|c0_g1_i1	164
TR27590|c0_g1_i1	88
TR27599|c0_g3_i1	22
TR2760|c1_g1_i10	130
TR27608|c0_g1_i3	42
TR27611|c1_g1_i1	50
TR27612|c0_g8_i7	70
TR27613|c0_g3_i1	24
TR27619|c0_g1_i4	22
TR2762|c4_g2_i10	134
TR2762|c4_g2_i5	290
TR27622|c0_g3_i1	18
TR27627|c0_g2_i1	18
TR27628|c0_g4_i3	78
TR27631|c0_g1_i1	24
TR27654|c0_g2_i1	36
TR27665|c0_g2_i1	24
TR27665|c0_g2_i3	40
TR27668|c0_g1_i2	68
TR2767|c1_g1_i2	48
TR27680|c0_g1_i2	90
TR27681|c0_g1_i1	24
TR27681|c0_g1_i5	178
TR27689|c0_g1_i2	32
TR27689|c0_g3_i2	368
TR2769|c0_g1_i1	60
TR27701|c0_g1_i2	32
TR27706|c0_g1_i1	24
TR27711|c0_g2_i10	64
TR27712|c1_g1_i2	190
TR27713|c0_g1_i3	36
TR27718|c0_g2_i3	228
TR27728|c0_g2_i1	28
TR2773|c0_g3_i1	186
TR27735|c0_g1_i2	150
TR27742|c0_g2_i1	28
TR27743|c0_g1_i3	66
TR27743|c0_g3_i1	42
TR27750|c0_g1_i3	224
TR27762|c0_g3_i1	16
TR27763|c0_g2_i1	46
TR2778|c0_g2_i13	138
TR2778|c0_g2_i14	102
TR27782|c0_g2_i1	46
TR27783|c0_g1_i3	32
TR27787|c0_g1_i2	40
TR27794|c0_g1_i2	78
TR27795|c0_g2_i1	14
TR27797|c4_g2_i5	310
TR27797|c4_g3_i1	96
TR27798|c0_g1_i3	46
TR27807|c0_g1_i5	54
TR27811|c0_g1_i1	60
TR2782|c0_g3_i2	104
TR27820|c0_g1_i2	1138
TR27824|c4_g12_i1	88
TR2783|c0_g1_i2	434
TR2783|c0_g1_i3	388
TR2783|c0_g1_i4	194
TR27834|c0_g1_i1	98
TR27834|c0_g2_i1	62
TR27834|c0_g2_i2	26
TR27835|c0_g1_i2	32
TR27839|c0_g1_i1	50
TR27842|c0_g1_i3	28
TR27847|c0_g1_i3	40
TR27848|c0_g4_i1	44
TR27858|c2_g1_i1	20
TR2786|c0_g1_i6	150
TR27864|c0_g2_i1	22
TR27865|c0_g3_i2	54
TR27870|c0_g1_i1	30
TR2789|c1_g2_i4	308
TR27892|c0_g1_i2	40
TR27898|c0_g1_i2	128
TR27899|c0_g1_i4	114
TR27900|c0_g1_i1	44
TR27902|c0_g1_i2	16
TR27902|c0_g2_i1	44
TR27908|c0_g1_i1	42
TR27909|c0_g1_i4	92
TR27918|c0_g1_i2	30
TR2792|c1_g1_i2	104
TR27923|c0_g1_i1	38
TR27925|c1_g3_i1	224
TR27929|c0_g2_i1	20
TR2793|c0_g4_i8	764
TR2793|c0_g9_i1	1126
TR27931|c0_g1_i1	118
TR27935|c0_g1_i2	64
TR27939|c0_g1_i3	52
TR27943|c0_g1_i1	20
TR27945|c1_g1_i2	144
TR27945|c1_g1_i4	88
TR27955|c0_g1_i1	62
TR27955|c0_g1_i10	64
TR27955|c0_g1_i2	30
TR27955|c0_g1_i7	58
TR2796|c0_g1_i1	192
TR2796|c0_g1_i5	70
TR2796|c0_g1_i7	56
TR27973|c0_g1_i1	62
TR27982|c0_g3_i1	16
TR28000|c0_g1_i1	12
TR28000|c0_g2_i4	40
TR28009|c0_g1_i1	40
TR2801|c1_g1_i7	68
TR2802|c0_g1_i3	52
TR2802|c0_g1_i6	30
TR28024|c0_g2_i13	20
TR28026|c0_g1_i1	58
TR28026|c0_g1_i3	52
TR28026|c0_g1_i4	58
TR28026|c0_g1_i8	70
TR28031|c0_g1_i2	40
TR28036|c0_g2_i4	226
TR28037|c0_g1_i1	18
TR28038|c0_g1_i1	60
TR28047|c0_g2_i2	60
TR28049|c3_g2_i1	60
TR28049|c3_g2_i5	260
TR28050|c0_g1_i5	38
TR28051|c0_g1_i2	216
TR28056|c0_g3_i1	42
TR28063|c0_g1_i1	234
TR28065|c0_g1_i2	16
TR28069|c0_g1_i3	16
TR28069|c0_g1_i5	50
TR2807|c0_g1_i12	32
TR2807|c0_g1_i6	66
TR28072|c0_g1_i1	24
TR28072|c0_g1_i6	32
TR28076|c0_g1_i1	162
TR28076|c0_g1_i3	206
TR2808|c0_g1_i1	132
TR2808|c0_g1_i11	32
TR2808|c0_g1_i2	132
TR2808|c0_g1_i4	110
TR28080|c0_g1_i1	40
TR28082|c0_g2_i1	20
TR28082|c0_g2_i2	52
TR28084|c0_g2_i1	166
TR28084|c0_g5_i2	126
TR28102|c0_g2_i1	24
TR28108|c0_g1_i1	16
TR28108|c0_g4_i1	34
TR28119|c0_g2_i1	18
TR2812|c1_g1_i12	46
TR2812|c1_g1_i4	104
TR28120|c0_g1_i1	192
TR28125|c0_g1_i3	14
TR28125|c0_g3_i1	98
TR28128|c0_g1_i3	16
TR28129|c1_g1_i1	22
TR28131|c0_g2_i1	436
TR28134|c0_g1_i2	78
TR28148|c0_g1_i4	34
TR28149|c0_g1_i1	90
TR28156|c0_g1_i1	18
TR2817|c0_g1_i1	154
TR2817|c0_g1_i8	102
TR28173|c0_g1_i4	32
TR28176|c0_g1_i3	62
TR28184|c0_g1_i1	50
TR28190|c0_g2_i1	28
TR28192|c1_g1_i4	14
TR28197|c0_g1_i2	260
TR28199|c0_g1_i2	130
TR28202|c0_g2_i3	28
TR28204|c0_g1_i1	104
TR28204|c0_g1_i6	58
TR28212|c2_g1_i1	34
TR28214|c2_g1_i1	16
TR28214|c3_g3_i1	12
TR28219|c0_g3_i2	76
TR2822|c0_g1_i1	36
TR28220|c0_g1_i3	70
TR28224|c0_g6_i1	258
TR28224|c0_g7_i1	190
TR28224|c0_g9_i3	634
TR28226|c0_g1_i3	164
TR28227|c0_g2_i2	32
TR28234|c0_g3_i1	18
TR28234|c0_g3_i8	36
TR28238|c0_g1_i2	156
TR28241|c0_g1_i1	24
TR28241|c0_g1_i3	34
TR28241|c0_g1_i4	30
TR28252|c0_g2_i1	54
TR28256|c0_g1_i2	1114
TR28256|c0_g4_i1	938
TR28263|c0_g1_i1	300
TR28264|c0_g1_i3	686
TR28265|c0_g1_i2	50
TR28266|c0_g1_i2	60
TR28269|c2_g3_i3	38
TR28269|c2_g3_i5	56
TR28283|c0_g1_i1	174
TR28284|c0_g1_i1	30
TR28295|c0_g2_i2	70
TR28297|c0_g1_i2	22
TR2830|c0_g1_i2	20
TR28311|c0_g1_i2	40
TR28316|c0_g1_i1	74
TR2832|c0_g4_i1	12
TR28326|c0_g1_i1	20
TR28351|c0_g2_i1	14
TR28352|c1_g1_i2	40
TR28352|c1_g1_i3	96
TR28352|c1_g1_i4	108
TR28352|c1_g1_i6	50
TR28352|c1_g1_i8	32
TR28357|c1_g1_i1	26
TR2836|c0_g4_i2	62
TR2836|c0_g4_i5	20
TR28369|c0_g1_i1	208
TR28369|c0_g1_i2	326
TR28370|c0_g2_i3	40
TR28370|c0_g2_i4	46
TR28373|c0_g1_i1	28
TR28377|c0_g1_i4	44
TR2839|c1_g3_i1	32
TR28393|c0_g3_i1	22
TR28399|c0_g7_i1	16
TR28400|c0_g1_i2	116
TR28400|c0_g1_i4	84
TR28400|c0_g1_i8	114
TR28414|c0_g1_i7	60
TR28416|c0_g1_i2	26
TR28418|c0_g4_i2	38
TR28419|c1_g1_i2	52
TR2842|c0_g4_i1	26
TR28420|c0_g2_i2	44
TR28421|c0_g1_i2	22
TR28426|c0_g1_i2	26
TR28429|c0_g1_i2	36
TR28430|c0_g1_i1	26
TR28434|c0_g1_i2	1456
TR28434|c0_g2_i1	182
TR28434|c1_g1_i1	42
TR28439|c0_g2_i2	30
TR2844|c1_g5_i2	30
TR2844|c2_g1_i5	74
TR28447|c0_g1_i3	70
TR28451|c0_g1_i1	116
TR28451|c0_g1_i3	74
TR28459|c0_g1_i4	42
TR28462|c0_g5_i1	66
TR2848|c0_g1_i3	122
TR2849|c1_g1_i1	50
TR2849|c1_g2_i1	32
TR2850|c1_g4_i2	160
TR2850|c1_g4_i4	52
TR28534|c1_g3_i1	22
TR28545|c0_g2_i2	26
TR28546|c0_g1_i3	36
TR28550|c2_g3_i1	152
TR28550|c2_g3_i10	136
TR28550|c2_g3_i11	50
TR28550|c2_g3_i5	98
TR28550|c2_g3_i7	138
TR28552|c0_g1_i6	68
TR2856|c0_g2_i1	54
TR28568|c0_g1_i1	36
TR28573|c0_g1_i2	56
TR2859|c0_g2_i1	22
TR28592|c0_g1_i3	10
TR2861|c1_g2_i1	40
TR2861|c2_g2_i1	14
TR2861|c2_g6_i1	20
TR28616|c0_g1_i1	208
TR2862|c0_g1_i1	110
TR2862|c0_g1_i2	610
TR28621|c0_g1_i3	22
TR28624|c2_g5_i1	78
TR28633|c0_g2_i3	34
TR28635|c0_g4_i1	176
TR28635|c0_g8_i1	38
TR2864|c0_g1_i3	40
TR28640|c0_g1_i6	42
TR28655|c2_g2_i3	44
TR28655|c2_g2_i6	54
TR28659|c1_g2_i1	436
TR28659|c1_g2_i3	218
TR28659|c1_g2_i4	322
TR28659|c1_g2_i5	162
TR28660|c0_g2_i4	82
TR28662|c0_g2_i1	22
TR2867|c0_g2_i1	24
TR2867|c0_g3_i4	70
TR28672|c1_g3_i3	74
TR28672|c1_g3_i5	66
TR28672|c1_g3_i6	124
TR28682|c0_g3_i3	112
TR28688|c0_g1_i2	24
TR28694|c0_g1_i2	26
TR28695|c0_g3_i1	382
TR28705|c0_g1_i4	440
TR28706|c0_g1_i1	70
TR28713|c0_g3_i6	22
TR28716|c3_g2_i6	22
TR28716|c3_g2_i7	284
TR28717|c1_g1_i1	218
TR28717|c1_g1_i2	66
TR28718|c0_g1_i2	14
TR28719|c0_g1_i1	36
TR2872|c0_g1_i3	16
TR28722|c0_g1_i1	30
TR28724|c0_g1_i4	164
TR28729|c0_g2_i1	18
TR28729|c0_g2_i2	56
TR28729|c0_g5_i1	16
TR28731|c0_g1_i2	68
TR28735|c0_g1_i1	44
TR28737|c0_g1_i1	116
TR2874|c0_g1_i3	20
TR28740|c0_g2_i2	42
TR28750|c2_g3_i2	36
TR28759|c0_g1_i1	178
TR28759|c0_g1_i5	64
TR2876|c0_g1_i1	66
TR2876|c1_g2_i1	156
TR2876|c1_g2_i2	206
TR2876|c1_g2_i6	94
TR28769|c0_g1_i1	34
TR28787|c0_g1_i4	44
TR28795|c0_g1_i1	50
TR28795|c0_g4_i4	262
TR2882|c0_g1_i3	48
TR2882|c0_g1_i4	46
TR28820|c1_g4_i1	26
TR28820|c1_g4_i5	74
TR28820|c1_g4_i6	28
TR28823|c1_g1_i1	24
TR28823|c1_g1_i5	34
TR28823|c1_g1_i8	46
TR28825|c0_g1_i1	294
TR28834|c1_g2_i1	28
TR28834|c1_g3_i1	34
TR28835|c0_g1_i3	152
TR28841|c0_g1_i1	198
TR28842|c0_g1_i4	68
TR28844|c0_g1_i1	13374
TR28845|c0_g1_i1	498
TR28854|c0_g1_i1	16
TR28854|c0_g2_i2	352
TR28856|c0_g1_i8	26
TR28856|c0_g1_i9	54
TR28859|c0_g1_i4	22
TR28860|c0_g1_i3	54
TR28867|c1_g11_i1	38
TR28867|c1_g12_i1	148
TR28867|c1_g3_i1	52
TR28867|c1_g6_i2	26
TR28873|c0_g1_i2	902
TR28874|c0_g2_i1	26
TR28877|c0_g2_i1	24
TR28881|c0_g2_i1	30
TR28882|c6_g1_i2	54
TR28890|c0_g3_i5	210
TR28890|c0_g3_i6	106
TR28890|c0_g3_i7	242
TR28891|c0_g3_i1	30
TR28892|c0_g1_i1	82
TR28893|c0_g2_i1	24
TR28893|c1_g3_i2	80
TR28893|c1_g5_i3	48
TR28896|c0_g1_i1	48
TR28901|c0_g2_i1	60
TR28901|c0_g2_i4	24
TR28903|c0_g9_i1	16
TR28905|c0_g1_i2	88
TR2891|c0_g1_i1	1764
TR2891|c0_g1_i7	326
TR28910|c1_g3_i1	36
TR28912|c0_g1_i2	128
TR28912|c0_g1_i4	422
TR28919|c0_g1_i6	52
TR2892|c0_g1_i1	88
TR28923|c0_g1_i2	416
TR28928|c4_g1_i1	34
TR28931|c1_g1_i2	46
TR28942|c0_g2_i1	56
TR28943|c0_g1_i1	24
TR28943|c0_g2_i1	176
TR28947|c1_g1_i1	80
TR28953|c2_g1_i3	1480
TR28955|c0_g1_i3	170
TR28955|c0_g4_i1	22
TR28956|c0_g1_i3	44
TR28957|c0_g1_i1	40
TR28966|c0_g4_i2	30
TR28968|c0_g1_i5	66
TR2898|c0_g2_i2	18
TR28985|c3_g1_i3	26
TR28985|c3_g1_i7	92
TR28988|c1_g3_i1	304
TR28988|c1_g5_i1	1466
TR28990|c0_g1_i2	260
TR28991|c0_g1_i3	338
TR28991|c0_g1_i4	38
TR28995|c0_g1_i1	104
TR2900|c0_g2_i2	2818
TR29000|c0_g1_i1	20
TR29000|c0_g2_i4	12
TR29001|c0_g3_i1	14
TR29001|c0_g7_i2	92
TR29005|c0_g1_i2	1120
TR29005|c0_g1_i3	736
TR29006|c0_g1_i2	174
TR29007|c0_g1_i5	46
TR29010|c0_g3_i1	30
TR29011|c0_g1_i1	20
TR29015|c0_g1_i1	18
TR29015|c0_g1_i4	22
TR29018|c0_g1_i1	22
TR29018|c1_g1_i1	36
TR29018|c1_g1_i4	22
TR2902|c0_g1_i3	84
TR29029|c0_g1_i2	84
TR29031|c0_g1_i1	16
TR29037|c1_g1_i3	20
TR29041|c0_g2_i2	566
TR2905|c0_g2_i3	92
TR2905|c0_g2_i7	254
TR29058|c0_g2_i1	36
TR2906|c0_g1_i1	42
TR29060|c0_g1_i1	42
TR29062|c0_g1_i2	52
TR29064|c0_g1_i1	14
TR29070|c1_g1_i3	54
TR29074|c0_g1_i13	42
TR29074|c0_g1_i5	52
TR29079|c0_g1_i2	206
TR29079|c0_g3_i1	56
TR2908|c0_g5_i1	14
TR29081|c1_g1_i1	180
TR29081|c1_g2_i2	4742
TR29081|c2_g3_i1	20
TR29083|c0_g2_i2	34
TR29092|c0_g1_i1	44
TR29094|c0_g1_i2	56
TR29100|c0_g1_i2	92
TR29101|c2_g1_i1	34
TR29101|c2_g1_i3	28
TR29103|c0_g1_i3	88
TR29107|c0_g1_i1	70
TR2911|c0_g1_i1	28
TR29110|c0_g1_i6	66
TR29125|c1_g1_i1	236
TR29125|c1_g1_i3	908
TR29125|c1_g1_i4	414
TR29125|c1_g1_i6	250
TR29125|c1_g2_i1	22
TR29126|c0_g1_i3	30
TR2913|c0_g1_i3	90
TR29130|c0_g3_i1	72
TR29142|c0_g1_i3	40
TR29144|c0_g1_i1	60
TR29147|c0_g1_i3	70
TR29156|c0_g1_i4	80
TR29166|c0_g1_i6	218
TR29166|c0_g1_i7	86
TR29166|c0_g1_i8	82
TR29166|c0_g1_i9	44
TR2917|c0_g2_i2	40
TR2917|c0_g2_i4	62
TR2917|c0_g4_i1	32
TR29170|c2_g1_i4	3462
TR29171|c0_g1_i4	30
TR29178|c0_g1_i1	206
TR29178|c0_g1_i5	42
TR29193|c1_g2_i1	58
TR29196|c0_g1_i1	14
TR29198|c0_g1_i5	38
TR2920|c0_g1_i5	248
TR29204|c0_g1_i2	26
TR29210|c0_g3_i1	18
TR29229|c0_g1_i3	2306
TR2923|c0_g2_i1	34
TR29230|c0_g1_i1	200
TR29230|c0_g1_i2	140
TR29230|c0_g1_i3	362
TR29230|c0_g1_i4	562
TR29230|c0_g3_i2	68
TR29230|c0_g3_i3	76
TR29230|c0_g3_i5	456
TR29230|c0_g3_i7	74
TR29241|c0_g7_i1	28
TR2925|c1_g1_i1	16
TR29252|c0_g2_i3	192
TR29253|c0_g1_i2	34
TR29253|c0_g2_i5	192
TR29253|c0_g3_i4	56
TR29264|c0_g1_i3	1322
TR29268|c0_g1_i5	50
TR29269|c0_g1_i1	126
TR29273|c0_g1_i4	3642
TR29274|c3_g2_i1	286
TR29275|c2_g2_i1	36
TR29280|c0_g1_i2	116
TR29283|c0_g1_i2	110
TR29286|c0_g1_i3	60
TR29288|c0_g1_i1	66
TR29293|c0_g1_i1	46
TR29294|c2_g1_i1	98
TR29298|c1_g1_i5	44
TR29306|c1_g2_i4	54
TR29309|c0_g3_i1	68
TR29309|c0_g3_i6	54
TR29310|c1_g1_i2	76
TR29310|c1_g1_i4	190
TR29311|c0_g1_i1	46
TR2932|c0_g1_i1	72
TR29321|c0_g2_i1	56
TR29324|c0_g2_i3	34
TR29326|c0_g2_i4	64
TR29334|c0_g2_i1	16
TR29335|c0_g2_i8	128
TR29336|c0_g2_i4	92
TR29337|c0_g3_i1	102
TR29338|c3_g1_i4	34
TR29338|c3_g6_i1	56
TR29338|c3_g6_i7	42
TR29340|c1_g1_i2	38
TR29340|c1_g1_i4	210
TR29350|c1_g1_i1	50
TR29351|c0_g1_i1	14
TR29351|c0_g2_i2	12
TR29355|c0_g1_i1	52
TR29359|c0_g1_i9	50
TR2936|c2_g1_i3	68
TR2936|c2_g1_i9	82
TR29360|c0_g1_i2	270
TR29361|c0_g2_i10	38
TR29361|c0_g4_i2	26
TR29364|c0_g2_i3	130
TR29367|c0_g1_i1	68
TR29367|c0_g1_i2	86
TR29367|c0_g1_i8	16
TR29375|c0_g1_i1	42
TR29378|c0_g1_i3	270
TR29378|c0_g1_i4	132
TR29388|c0_g2_i2	12
TR29394|c0_g2_i1	34
TR29394|c0_g2_i2	260
TR29396|c0_g1_i2	78
TR29404|c0_g2_i2	344
TR29406|c0_g3_i1	42
TR29408|c0_g1_i5	28
TR2941|c0_g1_i2	46
TR29410|c0_g1_i1	42
TR29410|c0_g1_i3	22
TR29412|c0_g3_i1	16
TR29417|c0_g1_i1	22
TR29422|c0_g1_i2	60
TR29437|c0_g1_i1	24
TR2945|c0_g1_i2	38
TR29475|c0_g2_i1	38
TR29475|c0_g2_i2	16
TR29477|c0_g1_i2	32
TR29479|c0_g1_i1	102
TR29479|c0_g2_i3	152
TR29491|c1_g1_i1	102
TR29491|c1_g1_i2	78
TR29492|c0_g1_i2	52
TR29498|c0_g2_i2	28
TR2950|c0_g1_i2	116
TR29502|c0_g1_i1	54
TR29504|c0_g2_i6	94
TR29506|c0_g1_i5	54
TR29507|c0_g2_i2	20
TR29509|c0_g1_i4	220
TR29514|c0_g1_i2	54
TR29514|c0_g1_i5	60
TR29515|c0_g1_i2	28
TR29516|c1_g1_i3	76
TR29518|c0_g1_i5	30
TR29521|c1_g1_i2	98
TR29524|c3_g1_i3	94
TR29524|c5_g1_i1	92
TR29527|c0_g3_i2	28
TR2953|c0_g2_i3	60
TR29532|c0_g2_i5	34
TR29533|c0_g1_i3	74
TR29533|c0_g1_i4	98
TR29533|c0_g1_i6	38
TR2954|c0_g1_i1	36
TR2954|c0_g2_i2	74
TR29541|c0_g1_i1	18
TR29548|c1_g1_i1	26
TR29548|c1_g2_i1	154
TR29550|c0_g2_i1	34
TR29559|c0_g2_i2	46
TR29563|c0_g1_i1	40
TR29567|c0_g5_i1	172
TR2957|c0_g1_i1	70
TR2957|c0_g3_i9	56
TR29574|c0_g3_i2	36
TR2958|c0_g1_i1	692
TR29580|c0_g2_i4	108
TR29587|c0_g1_i1	34
TR29595|c0_g3_i1	118
TR29595|c0_g4_i1	104
TR29595|c0_g4_i4	154
TR29604|c0_g1_i1	60
TR29611|c0_g1_i3	50
TR2962|c0_g3_i1	26
TR29622|c1_g2_i3	18
TR29626|c0_g1_i2	28
TR29628|c0_g4_i1	200
TR2963|c1_g1_i1	32
TR29630|c0_g1_i2	60
TR29630|c0_g1_i8	100
TR29634|c0_g2_i1	52
TR29634|c0_g5_i1	14
TR29636|c0_g1_i2	42
TR2964|c0_g4_i4	26
TR29642|c2_g1_i3	36
TR29643|c1_g1_i2	470
TR29647|c0_g1_i4	20
TR2965|c0_g1_i1	36
TR2965|c0_g2_i1	60
TR2965|c0_g2_i2	112
TR29650|c0_g1_i1	150
TR29655|c0_g1_i2	32
TR2967|c0_g4_i4	106
TR29671|c0_g2_i1	128
TR29672|c4_g3_i1	92
TR29672|c4_g3_i4	22
TR29673|c0_g2_i2	74
TR29673|c0_g3_i1	22
TR29673|c0_g3_i2	56
TR29679|c0_g1_i2	22
TR29680|c0_g1_i2	24
TR29681|c0_g1_i1	334
TR29681|c0_g1_i4	408
TR29682|c0_g2_i1	42
TR29688|c0_g2_i10	20
TR29694|c0_g2_i2	86
TR29695|c1_g1_i3	132
TR29695|c1_g1_i7	76
TR29696|c0_g2_i2	28
TR29700|c0_g3_i1	86
TR29702|c0_g4_i2	52
TR29702|c0_g4_i3	68
TR29707|c1_g1_i3	1152
TR29711|c0_g2_i3	80
TR29712|c0_g2_i2	96
TR29719|c1_g5_i3	138
TR29719|c1_g6_i1	24
TR29719|c1_g6_i2	14
TR29721|c0_g3_i1	44
TR2973|c0_g1_i1	44
TR2973|c0_g4_i5	12
TR29743|c0_g2_i4	16
TR29746|c1_g2_i2	190
TR29747|c0_g2_i5	78
TR2975|c0_g2_i2	130
TR2975|c0_g3_i1	76
TR29753|c0_g1_i1	100
TR29754|c0_g1_i2	44
TR29759|c0_g1_i2	36
TR29760|c1_g1_i4	238
TR29763|c3_g1_i1	1030
TR29763|c3_g3_i1	518
TR29763|c3_g4_i2	492
TR29763|c3_g5_i2	620
TR29764|c0_g1_i1	56
TR29764|c0_g4_i2	68
TR29772|c0_g4_i3	56
TR29772|c0_g5_i2	16
TR29773|c0_g1_i6	168
TR29775|c0_g1_i1	46
TR29776|c1_g6_i1	262
TR29778|c0_g2_i5	120
TR29778|c0_g4_i2	238
TR29780|c0_g1_i6	46
TR29787|c0_g1_i2	24
TR29790|c1_g1_i1	72
TR29790|c1_g2_i1	30
TR29790|c2_g1_i4	474
TR29793|c0_g1_i3	140
TR29801|c0_g1_i1	94
TR29802|c0_g2_i1	58
TR29802|c0_g2_i2	46
TR29809|c3_g1_i1	188
TR29809|c3_g1_i3	148
TR2981|c0_g1_i1	48
TR29812|c0_g1_i5	56
TR29816|c0_g1_i4	30
TR29817|c0_g2_i3	390
TR29817|c0_g2_i4	1268
TR29823|c5_g1_i2	944
TR29823|c5_g2_i1	1388
TR29825|c1_g1_i1	450
TR29828|c3_g2_i1	110
TR29829|c0_g1_i1	410
TR29833|c0_g1_i1	98
TR29836|c0_g1_i6	36
TR2984|c0_g1_i1	204
TR29853|c0_g2_i2	36
TR29856|c0_g1_i1	22
TR2986|c0_g1_i6	94
TR29867|c1_g4_i3	54
TR29868|c0_g2_i1	24
TR29869|c0_g1_i11	86
TR29872|c0_g1_i2	462
TR29874|c1_g1_i4	60
TR29876|c0_g1_i3	34
TR29887|c0_g1_i2	378
TR29887|c0_g1_i4	360
TR29888|c0_g3_i1	18
TR2989|c0_g2_i2	44
TR29905|c0_g1_i7	56
TR29908|c0_g1_i2	90
TR29914|c0_g1_i2	126
TR29919|c0_g1_i1	86
TR29920|c0_g1_i3	64
TR29930|c0_g1_i1	702
TR2994|c0_g3_i1	20
TR29944|c0_g1_i3	48
TR29946|c0_g1_i2	84
TR29946|c0_g1_i3	72
TR29948|c1_g1_i3	46
TR29955|c4_g7_i8	56
TR29960|c0_g1_i2	26
TR29965|c0_g2_i1	20
TR29966|c4_g5_i1	48
TR29967|c0_g1_i1	20
TR29968|c0_g1_i3	180
TR29977|c0_g2_i2	48
TR29980|c0_g2_i1	90
TR29981|c0_g1_i1	50
[truncated: 18,117 more rows]

## Sheet: OKP2_vs_F1 Differential
Transcript ID	baseMeanA( F1 )	baseMeanB( OK_P2 )	log2FoldChange( OK_P2 Vs. F1 )	pval	padj	Significant	Hit Description	Hit Organism	Family	Gene Ontology (Biological Process)	Gene Ontology (Molecular Function)	Gene Ontology (Cellular Component)	Pathway
TR42502|c1_g3_i1	7032.06	567.263	-3.63186	0.000190775	0.0595396	No	PREDICTED: linoleate 13S-lipoxygenase 2-1, chloroplastic-like	Sesamum indicum	NA	NA	NA	NA	NA
TR27122|c0_g2_i4	114.91	11.6962	-3.29639	0.000139637	0.0501995	No	unnamed protein product	Vitis vinifera	NA	negative regulation of defense response[GO:0031348] ; protein folding[GO:0006457] ; response to high light intensity[GO:0009644] ; ER-nucleus signaling pathway[GO:0006984] ; response to endoplasmic reticulum stress[GO:0034976] ; response to hydrogen peroxide[GO:0042542] ; response to heat[GO:0009408]	NA	integral component of membrane[GO:0016021]	NA
TR2178|c4_g2_i1	125.169	13.6455	-3.19738	0.000184458	0.0582078	No	PREDICTED: uncharacterized protein LOC105169690	Sesamum indicum	NA	NA	NA	NA	NA
TR36023|c0_g5_i1	158.001	17.5442	-3.17086	0.000150137	0.0507615	No	PREDICTED: uncharacterized protein LOC105178033	Sesamum indicum	NA	NA	NA	NA	NA
TR40516|c0_g1_i2	7399.36	859.667	-3.10555	0.0013796	0.204602	No	PREDICTED: stachyose synthase	Sesamum indicum	NA	NA	NA	NA	NA
TR35824|c1_g1_i1	98.4939	11.6962	-3.074	0.000325366	0.0832483	No	Histone H2B.3	Morus notabilis	NA	NA	protein heterodimerization activity[GO:0046982] ; DNA binding[GO:0003677]	nucleosome[GO:0000786] ; nucleus[GO:0005634]	NA
TR3151|c0_g2_i1	8339.15	1007.82	-3.04866	0.00230576	0.260377	No	PREDICTED: acid phosphatase 1-like	Solanum lycopersicum	NA	NA	NA	NA	NA
TR42025|c0_g2_i1	108.754	13.6455	-2.99457	0.000415863	0.0952477	No	PREDICTED: LOW QUALITY PROTEIN: interactor of constitutive active ROPs 3	Sesamum indicum	NA	NA	NA	NA	NA
TR35838|c1_g5_i1	137.481	17.5442	-2.97016	0.000377095	0.0888771	No	PREDICTED: uncharacterized protein LOC105170041	Sesamum indicum	NA	NA	NA	NA	NA
TR8004|c0_g2_i1	151.845	19.4936	-2.96153	0.000344666	0.085119	No	NA	NA	NA	NA	NA	NA	NA
TR2510|c0_g2_i4	283.17	37.0378	-2.9346	0.000148785	0.0509105	No	PREDICTED: NAC transcription factor 29	Sesamum indicum	NA	NA	NA	NA	NA
TR8118|c1_g2_i3	238.027	31.1897	-2.93198	0.000202719	0.0622413	No	hypothetical protein MIMGU_mgv1a001909mg	Mimulus guttatus	NA	proteolysis[GO:0006508]	serine-type endopeptidase activity[GO:0004252]	NA	NA
TR8118|c1_g5_i1	248.287	33.1391	-2.9054	0.000210391	0.0628969	No	NA	NA	NA	NA	NA	NA	NA
TR42013|c1_g2_i5	174.416	23.3923	-2.89843	0.000362478	0.087242	No	PREDICTED: protein BPS1, chloroplastic-like	Sesamum indicum	NA	NA	NA	NA	NA
TR33640|c0_g1_i1	100.546	13.6455	-2.88136	0.000633196	0.124021	No	NA	NA	NA	NA	NA	NA	NA
TR34225|c0_g1_i8	100.546	13.6455	-2.88136	0.000633196	0.123595	No	hypothetical protein JCGZ_09570	Jatropha curcas	NA	NA	NA	NA	NA
TR36096|c0_g2_i2	100.546	13.6455	-2.88136	0.000633196	0.12445	No	PREDICTED: IAA-amino acid hydrolase ILR1-like 2	Sesamum indicum	NA	NA	NA	NA	NA
TR32077|c0_g6_i7	285.222	38.9872	-2.87101	0.000192459	0.059737	No	PREDICTED: histone H3.2-like isoform X2	Solanum tuberosum	NA	NA	NA	NA	NA
TR34265|c3_g3_i1	170.312	23.3923	-2.86408	0.000425791	0.0955943	No	NA	NA	NA	NA	NA	NA	NA
TR37395|c0_g2_i4	112.858	15.5949	-2.85536	0.00066826	0.127804	No	NA	NA	NA	NA	NA	NA	NA
TR34265|c3_g2_i1	1844.71	255.366	-2.85275	0.000146635	0.0504789	No	PREDICTED: uncharacterized protein LOC105160233	Sesamum indicum	NA	NA	NA	NA	NA
TR34779|c0_g3_i1	168.26	23.3923	-2.84659	0.000461854	0.101289	No	PREDICTED: 50S ribosomal protein L6, chloroplastic	Sesamum indicum	NA	NA	NA	NA	NA
TR30093|c0_g3_i2	139.533	19.4936	-2.83954	0.000594381	0.119298	No	hypothetical protein MIMGU_mgv1a011861mg	Mimulus guttatus	NA	oxidation-reduction process[GO:0055114]	oxidoreductase activity[GO:0016491]	NA	NA
TR41683|c1_g1_i1	209.3	29.2404	-2.83954	0.000358045	0.0865418	No	4-coumarate: CoA ligase	Scutellaria baicalensis	Lamiaceae	metabolic process[GO:0008152]	ligase activity[GO:0016874]	NA	NA
TR34419|c0_g1_i4	389.872	54.582	-2.8365	0.000146448	0.0507219	No	PREDICTED: BI1-like protein	Sesamum indicum	NA	NA	NA	NA	NA
TR35739|c0_g1_i6	291.378	40.9365	-2.83143	0.000219968	0.0647378	No	PREDICTED: putative glucose-6-phosphate 1-epimerase	Sesamum indicum	NA	NA	NA	NA	NA
TR28903|c0_g2_i1	332.417	46.7846	-2.82889	0.000183612	0.0582645	No	hypothetical protein CICLE_v10004755mg	Citrus clementina	NA	microtubule-based process[GO:0007017] ; metabolic process[GO:0008152]	structural constituent of cytoskeleton[GO:0005200] ; GTP binding[GO:0005525] ; GTPase activity[GO:0003924]	microtubule[GO:0005874]	NA
TR40235|c0_g9_i5	151.845	21.4429	-2.82402	0.000570841	0.116216	No	NA	NA	NA	NA	NA	NA	NA
TR30137|c0_g1_i5	285.222	40.9365	-2.80062	0.000258989	0.0721119	No	PREDICTED: photosystem I reaction center subunit psaK, chloroplastic	Sesamum indicum	NA	NA	NA	NA	NA
TR36764|c0_g5_i7	186.728	27.291	-2.77444	0.000532747	0.112076	No	PREDICTED: probable 3-hydroxyisobutyrate dehydrogenase-like 1, mitochondrial	Sesamum indicum	NA	NA	NA	NA	NA
TR21800|c0_g1_i1	252.391	37.0378	-2.76859	0.000358006	0.0869021	No	hypothetical protein MIMGU_mgv1a011266mg	Mimulus guttatus	NA	cell wall organization[GO:0071555] ; xyloglucan metabolic process[GO:0010411] ; cell wall biogenesis[GO:0042546]	xyloglucan:xyloglucosyl transferase activity[GO:0016762] ; hydrolase activity, hydrolyzing O-glycosyl compounds[GO:0004553]	cell wall[GO:0005618] ; apoplast[GO:0048046]	NA
TR28256|c0_g1_i1	2482.87	364.53	-2.7679	0.00037248	0.088896	No	PREDICTED: photosystem II reaction center W protein, chloroplastic-like	Nicotiana sylvestris	NA	NA	NA	NA	NA
TR7878|c0_g12_i1	451.43	66.2782	-2.7679	0.000169557	0.0550343	No	PREDICTED: protein EARLY RESPONSIVE TO DEHYDRATION 15	Sesamum indicum	NA	NA	NA	NA	NA
TR42225|c1_g1_i8	301.638	44.8353	-2.75011	0.000294944	0.0790241	No	NA	NA	NA	NA	NA	NA	NA
TR37991|c0_g1_i5	603.275	89.6705	-2.75011	0.000142789	0.0503761	No	malate dehydrogenase	Perilla frutescens	Lamiaceae	carbohydrate metabolic process[GO:0005975] ; malate metabolic process[GO:0006108] ; tricarboxylic acid cycle[GO:0006099]	L-malate dehydrogenase activity[GO:0030060]	NA	map00630:Glyoxylate and dicarboxylate metabolism(dehydrogenase[ec:1.1.1.37]) ; map01130:Biosynthesis of antibiotics(dehydrogenase[ec:1.1.1.37]) ; map00720:Carbon fixation pathways in prokaryotes(dehydrogenase[ec:1.1.1.37]) ; map00020:Citrate cycle (TCA cycle)(dehydrogenase[ec:1.1.1.37]) ; map00620:Pyruvate metabolism(dehydrogenase[ec:1.1.1.37]) ; map00270:Cysteine and methionine metabolism(dehydr…
TR25751|c1_g1_i3	170.312	25.3417	-2.7486	0.000656174	0.126773	No	PREDICTED: uncharacterized protein LOC105172028	Sesamum indicum	NA	NA	NA	NA	NA
TR7156|c0_g1_i1	313.949	46.7846	-2.74643	0.00028339	0.07814	No	cation-dependent phenylpropanoid and flavonoid O-methyltransferase	Ocimum basilicum	Lamiaceae	methylation[GO:0032259]	O-methyltransferase activity[GO:0008171]	NA	NA
TR25751|c1_g1_i1	627.899	93.5692	-2.74643	0.000142012	0.0504151	No	PREDICTED: uncharacterized protein LOC105172030	Sesamum indicum	NA	NA	NA	NA	NA
TR43724|c0_g4_i1	182.624	27.291	-2.74238	0.000617901	0.121866	No	PREDICTED: 2-oxoglutarate dehydrogenase, mitochondrial-like	Sesamum indicum	NA	NA	NA	NA	NA
TR32682|c4_g2_i1	1186.03	177.392	-2.74113	0.000152665	0.0513108	No	PREDICTED: bifunctional epoxide hydrolase 2-like	Nicotiana tomentosiformis	NA	NA	NA	NA	NA
TR39740|c2_g5_i4	439.119	66.2782	-2.728	0.000209681	0.0633515	No	PREDICTED: delta(8)-fatty-acid desaturase-like	Sesamum indicum	NA	NA	NA	NA	NA
TR38703|c0_g2_i3	451.43	68.2276	-2.72608	0.000205498	0.0627553	No	NA	NA	NA	NA	NA	NA	NA
TR33905|c0_g2_i4	822.835	124.759	-2.72146	0.000148894	0.0506427	No	PREDICTED: uncharacterized protein LOC105164617 isoform X1	Sesamum indicum	NA	NA	NA	NA	NA
TR37878|c0_g1_i2	642.262	97.4679	-2.72016	0.00015941	0.0529512	No	HSP70	Populus alba	NA	NA	NA	NA	NA
TR25573|c1_g1_i2	281.118	42.8859	-2.7126	0.000382432	0.0897625	No	NA	NA	NA	NA	NA	NA	NA
TR28102|c0_g4_i1	114.91	17.5442	-2.71143	0.00109757	0.177615	No	NA	NA	NA	NA	NA	NA	NA
TR42641|c0_g12_i2	1231.17	189.088	-2.70291	0.000189434	0.0594477	No	pyrophosphatase, partial	Solanum pimpinellifolium	NA	metabolic process[GO:0008152] ; proton transport[GO:0015992] ; transmembrane transport[GO:0055085]	inorganic diphosphatase activity[GO:0004427] ; hydrogen-translocating pyrophosphatase activity[GO:0009678]	integral component of membrane[GO:0016021]	map00190:Oxidative phosphorylation(diphosphatase[ec:3.6.1.1])
TR31294|c0_g2_i4	139.533	21.4429	-2.70203	0.000973865	0.163176	No	NA	NA	NA	NA	NA	NA	NA
TR40019|c0_g5_i1	279.066	42.8859	-2.70203	0.000403882	0.0936363	No	hypothetical protein MIMGU_mgv1a008527mg	Mimulus guttatus	NA	tetrapyrrole biosynthetic process[GO:0033014] ; peptidyl-pyrromethane cofactor linkage[GO:0018160]	hydroxymethylbilane synthase activity[GO:0004418]	NA	map00860:Porphyrin and chlorophyll metabolism(synthase[ec:2.5.1.61])
TR41663|c2_g7_i3	1368.66	210.531	-2.70066	0.000209771	0.0630434	No	PREDICTED: ruBisCO large subunit-binding protein subunit beta, chloroplastic	Sesamum indicum	NA	NA	NA	NA	NA
TR43123|c0_g1_i1	75.9224	11.6962	-2.69849	0.00119371	0.188345	No	PREDICTED: peptidyl-prolyl cis-trans isomerase FKBP62-like	Nicotiana sylvestris	NA	NA	NA	NA	NA
TR2701|c1_g1_i1	227.767	35.0885	-2.69849	0.00055261	0.113728	No	NA	NA	NA	NA	NA	NA	NA
TR37634|c0_g4_i2	870.03	134.506	-2.6934	0.000171313	0.0552884	No	PREDICTED: uncharacterized protein LOC105171465	Sesamum indicum	NA	NA	NA	NA	NA
TR29041|c0_g2_i1	352.937	54.582	-2.69291	0.000310731	0.0813356	No	hypothetical protein MIMGU_mgv1a015166mg	Mimulus guttatus	NA	translation[GO:0006412]	structural constituent of ribosome[GO:0003735] ; RNA binding[GO:0003723]	ribosome[GO:0005840]	NA
TR40103|c0_g2_i1	125.169	19.4936	-2.68281	0.0011479	0.184707	No	PREDICTED: UPF0051 protein ABCI8, chloroplastic	Sesamum indicum	NA	NA	NA	NA	NA
TR41789|c0_g1_i2	149.793	23.3923	-2.67886	0.000982959	0.163255	No	NA	NA	NA	NA	NA	NA	NA
TR36784|c0_g1_i5	660.73	103.316	-2.677	0.000193873	0.0598488	No	PREDICTED: uncharacterized protein LOC105172991 isoform X2	Sesamum indicum	NA	NA	NA	NA	NA
TR31131|c0_g1_i9	1089.59	171.544	-2.66714	0.000208874	0.0634452	No	PREDICTED: uncharacterized protein LOC105161139	Sesamum indicum	NA	NA	NA	NA	NA
TR37855|c1_g2_i1	556.08	87.7211	-2.6643	0.000227044	0.0657976	No	PREDICTED: uncharacterized protein LOC105155746	Sesamum indicum	NA	NA	NA	NA	NA
TR39328|c1_g1_i1	86.1822	13.6455	-2.65896	0.00140312	0.206473	No	PREDICTED: glutathione reductase, chloroplastic	Sesamum indicum	NA	NA	NA	NA	NA
TR41608|c0_g2_i3	135.429	21.4429	-2.65896	0.00116831	0.186933	No	PREDICTED: uncharacterized protein LOC105162694	Sesamum indicum	NA	NA	NA	NA	NA
TR33220|c0_g2_i1	160.053	25.3417	-2.65896	0.00098224	0.163614	No	PREDICTED: 28 kDa ribonucleoprotein, chloroplastic-like	Sesamum indicum	NA	NA	NA	NA	NA
TR40656|c0_g4_i1	172.364	27.291	-2.65896	0.000903425	0.154565	No	PREDICTED: uncharacterized protein LOC101258883	Solanum lycopersicum	NA	NA	NA	integral component of membrane[GO:0016021]	NA
TR33729|c0_g2_i5	209.3	33.1391	-2.65896	0.000722941	0.135078	No	PREDICTED: chlorophyll a-b binding protein, chloroplastic	Vitis vinifera	NA	regulation of proton transport[GO:0010155] ; pentose-phosphate shunt[GO:0006098] ; cellular cation homeostasis[GO:0030003] ; protein-chromophore linkage[GO:0018298] ; response to sucrose[GO:0009744] ; isopentenyl diphosphate biosynthetic process, methylerythritol 4-phosphate pathway[GO:0019288] ; response to high light intensity[GO:0009644] ; divalent metal ion transport[GO:0070838] ; glucosinola…	pigment binding[GO:0031409] ; metal ion binding[GO:0046872] ; chlorophyll binding[GO:0016168]	photosystem I[GO:0009522] ; chloroplast envelope[GO:0009941] ; integral component of membrane[GO:0016021] ; photosystem II[GO:0009523] ; chloroplast thylakoid membrane[GO:0009535] ; plastoglobule[GO:0010287]	NA
TR41722|c0_g3_i6	246.235	38.9872	-2.65896	0.000577949	0.117243	No	PREDICTED: carbamoyl-phosphate synthase small chain, chloroplastic	Sesamum indicum	NA	NA	NA	NA	NA
TR39740|c2_g5_i3	258.547	40.9365	-2.65896	0.000538547	0.112463	No	NA	NA	NA	NA	NA	NA	NA
TR42285|c0_g8_i4	295.482	46.7846	-2.65896	0.000445675	0.0985011	No	hypothetical protein POPTR_0011s05250g	Populus trichocarpa	NA	isoleucine biosynthetic process[GO:0009097] ; valine biosynthetic process[GO:0009099] ; oxidation-reduction process[GO:0055114]	ketol-acid reductoisomerase activity[GO:0004455] ; metal ion binding[GO:0046872]	NA	map00290:Valine, leucine and isoleucine biosynthesis(reductoisomerase (NADP+)[ec:1.1.1.86]) ; map01130:Biosynthesis of antibiotics(reductoisomerase (NADP+)[ec:1.1.1.86]) ; map00770:Pantothenate and CoA biosynthesis(reductoisomerase (NADP+)[ec:1.1.1.86])
TR2340|c0_g1_i8	443.223	70.1769	-2.65896	0.000284288	0.0780089	No	NA	NA	NA	NA	NA	NA	NA
TR7606|c0_g3_i1	662.782	105.265	-2.6545	0.000215746	0.063826	No	NA	NA	NA	NA	NA	NA	NA
TR34503|c1_g2_i4	453.482	72.1263	-2.65245	0.000286274	0.0781762	No	PREDICTED: fructose-bisphosphate aldolase 1, chloroplastic	Sesamum indicum	NA	NA	NA	NA	NA
TR42641|c0_g2_i1	917.225	146.202	-2.64931	0.00021431	0.0637331	No	NA	NA	NA	NA	NA	NA	NA
TR42825|c0_g7_i4	182.624	29.2404	-2.64284	0.000899648	0.154383	No	NA	NA	NA	NA	NA	NA	NA
TR8118|c1_g2_i6	1594.37	255.366	-2.64235	0.000328006	0.0835474	No	hypothetical protein MIMGU_mgv1a001909mg	Mimulus guttatus	NA	proteolysis[GO:0006508]	serine-type endopeptidase activity[GO:0004252]	NA	NA
TR42641|c0_g11_i1	328.313	52.6327	-2.64104	0.000420953	0.0952612	No	NA	NA	NA	NA	NA	NA	NA
TR37991|c0_g1_i3	467.846	76.025	-2.62149	0.000319906	0.0829725	No	PREDICTED: malate dehydrogenase, glyoxysomal	Vitis vinifera	NA	sulfur compound biosynthetic process[GO:0044272] ; coenzyme biosynthetic process[GO:0009108] ; cellular amino acid biosynthetic process[GO:0008652] ; jasmonic acid biosynthetic process[GO:0009695] ; leaf morphogenesis[GO:0009965] ; carotenoid biosynthetic process[GO:0016117] ; photorespiration[GO:0009853] ; regulation of plant-type hypersensitive response[GO:0010363] ; positive regulation of cata…	L-malate dehydrogenase activity[GO:0030060]	peroxisome[GO:0005777] ; chloroplast envelope[GO:0009941] ; vacuole[GO:0005773] ; apoplast[GO:0048046]	map00630:Glyoxylate and dicarboxylate metabolism(dehydrogenase[ec:1.1.1.37]) ; map01130:Biosynthesis of antibiotics(dehydrogenase[ec:1.1.1.37]) ; map00720:Carbon fixation pathways in prokaryotes(dehydrogenase[ec:1.1.1.37]) ; map00020:Citrate cycle (TCA cycle)(dehydrogenase[ec:1.1.1.37]) ; map00620:Pyruvate metabolism(dehydrogenase[ec:1.1.1.37]) ; map00270:Cysteine and methionine metabolism(dehydr…
TR38673|c1_g4_i1	71.8185	11.6962	-2.61832	0.00152826	0.214337	No	NA	NA	NA	NA	NA	NA	NA
TR37714|c0_g2_i1	287.274	46.7846	-2.61832	0.000548238	0.113651	No	hypothetical protein JCGZ_13151	Jatropha curcas	NA	NA	selenium binding[GO:0008430]	NA	NA
TR33905|c0_g1_i1	203.144	33.1391	-2.61589	0.00088505	0.152802	No	hypothetical protein MIMGU_mgv1a013424mg	Mimulus guttatus	NA	NA	NA	integral component of membrane[GO:0016021]	NA
TR38385|c0_g3_i3	106.702	17.5442	-2.60452	0.00164066	0.224017	No	PREDICTED: NADH--cytochrome b5 reductase 1-like	Sesamum indicum	NA	NA	NA	NA	NA
TR8118|c1_g2_i4	106.702	17.5442	-2.60452	0.00164066	0.22348	No	hypothetical protein MIMGU_mgv1a025139mg, partial	Mimulus guttatus	NA	proteolysis[GO:0006508]	serine-type endopeptidase activity[GO:0004252]	NA	NA
TR42331|c0_g4_i8	260.599	42.8859	-2.60325	0.00066679	0.127954	No	PREDICTED: uncharacterized protein LOC105167066	Sesamum indicum	NA	NA	NA	NA	NA
TR32784|c0_g1_i1	153.897	25.3417	-2.60238	0.00125891	0.194314	No	PREDICTED: uncharacterized protein LOC105168308	Sesamum indicum	NA	NA	NA	NA	NA
TR39127|c1_g1_i3	377.56	62.3795	-2.59756	0.000439507	0.0978998	No	PREDICTED: 3-oxoacyl-[acyl-carrier-protein] reductase FabG-like	Solanum lycopersicum	NA	oxidation-reduction process[GO:0055114]	oxidoreductase activity[GO:0016491]	NA	NA
TR35032|c1_g1_i3	648.418	107.215	-2.59642	0.000287116	0.078031	No	PREDICTED: calreticulin-3-like isoform X1	Cicer arietinum	NA	NA	NA	NA	NA
TR40516|c0_g2_i1	6867.9	1136.48	-2.5953	0.00592554	0.43598	No	stachyose synthase	Stachys affinis	Lamiaceae	metabolic process[GO:0008152]	galactinol-raffinose galactosyltransferase activity[GO:0047268]	NA	map00052:Galactose metabolism(galactosyltransferase[ec:2.4.1.67])
TR36328|c1_g4_i1	82.0783	13.6455	-2.58857	0.00178249	0.231158	No	PREDICTED: protein disulfide isomerase-like 2-3	Sesamum indicum	NA	NA	NA	NA	NA
TR33095|c1_g1_i2	1348.14	224.176	-2.58826	0.000356138	0.0868197	No	PREDICTED: carbonic anhydrase, chloroplastic-like isoform X2	Sesamum indicum	NA	NA	NA	NA	NA
TR44246|c1_g5_i2	316.001	52.6327	-2.5859	0.000556237	0.11365	No	PREDICTED: elongation factor G-1, chloroplastic	Sesamum indicum	NA	NA	NA	NA	NA
TR42666|c0_g9_i1	116.962	19.4936	-2.58496	0.00168965	0.224238	No	hypothetical protein MIMGU_mgv1a002810mg	Mimulus guttatus	NA	RNA modification[GO:0009451]	4 iron, 4 sulfur cluster binding[GO:0051539] ; transferase activity[GO:0016740]	NA	NA
TR43928|c0_g3_i11	116.962	19.4936	-2.58496	0.00168965	0.223715	No	PREDICTED: acetyl-coenzyme A carboxylase carboxyl transferase subunit alpha, chloroplastic-like	Sesamum indicum	NA	NA	NA	NA	NA
TR42531|c0_g1_i1	7978.01	1331.41	-2.58307	0.00841826	0.51471	No	unnamed protein product	Coffea canephora	NA	carbohydrate metabolic process[GO:0005975]	pyridoxal phosphate binding[GO:0030170] ; glycogen phosphorylase activity[GO:0008184]	NA	NA
TR3607|c0_g4_i1	104.65	17.5442	-2.5765	0.00181619	0.232869	No	PREDICTED: UDP-glucuronic acid decarboxylase 5-like	Erythranthe guttatus	NA	NA	NA	NA	NA
TR31494|c0_g4_i3	139.533	23.3923	-2.5765	0.0015223	0.21403	No	hypothetical protein JCGZ_00753	Jatropha curcas	NA	negative regulation of transcription, DNA-templated[GO:0045892] ; oxidation-reduction process[GO:0055114]	oxidoreductase activity[GO:0016491] ; FMN binding[GO:0010181]	NA	NA
TR39633|c3_g11_i2	279.066	46.7846	-2.5765	0.000676802	0.128572	No	NA	NA	NA	NA	NA	NA	NA
TR38803|c0_g6_i5	441.171	74.0756	-2.57427	0.000418105	0.0949951	No	cytochrome P450 CYP76A35	Salvia miltiorrhiza	NA	oxidation-reduction process[GO:0055114]	heme binding[GO:0020037] ; oxidoreductase activity, acting on paired donors, with incorporation or reduction of molecular oxygen[GO:0016705] ; monooxygenase activity[GO:0004497] ; iron ion binding[GO:0005506]	integral component of membrane[GO:0016021]	NA
TR42649|c2_g7_i4	707.925	118.911	-2.57372	0.000311015	0.0810365	No	PREDICTED: uncharacterized protein LOC105168700	Sesamum indicum	NA	NA	NA	NA	NA
TR40781|c0_g1_i5	127.221	21.4429	-2.56877	0.00169132	0.222897	No	PREDICTED: GTPase Era, mitochondrial	Sesamum indicum	NA	NA	NA	NA	NA
TR36623|c0_g1_i1	311.897	52.6327	-2.56704	0.000611443	0.121862	No	PREDICTED: biotin carboxyl carrier protein of acetyl-CoA carboxylase 1, chloroplastic isoform X1	Erythranthe guttatus	NA	NA	NA	NA	NA
TR42780|c0_g13_i4	242.131	40.9365	-2.56433	0.000861321	0.150535	No	PREDICTED: pyruvate dehydrogenase E1 component subunit alpha-3, chloroplastic	Sesamum indicum	NA	NA	NA	NA	NA
TR31330|c3_g4_i3	1013.67	171.544	-2.56294	0.000335646	0.0847335	No	PREDICTED: oxygen-evolving enhancer protein 2-1, chloroplastic-like	Sesamum indicum	NA	NA	NA	NA	NA
TR40255|c1_g2_i1	207.248	35.0885	-2.56229	0.0010603	0.174065	No	hypothetical protein AMTR_s00046p00069700	Amborella trichopoda	NA	polyamine catabolic process[GO:0006598] ; coumarin biosynthetic process[GO:0009805] ; response to wounding[GO:0009611] ; methylation[GO:0032259] ; positive regulation of flavonoid biosynthetic process[GO:0009963] ; cellular modified amino acid biosynthetic process[GO:0042398] ; cysteine biosynthetic process[GO:0019344]	O-methyltransferase activity[GO:0008171]	NA	NA
TR43166|c2_g3_i2	57.4548	9.74679	-2.55943	0.00137889	0.205032	No	NA	NA	NA	NA	NA	NA	NA
TR37450|c1_g5_i1	80.0263	13.6455	-2.55205	0.00201247	0.240147	No	NA	NA	NA	NA	NA	NA	NA
TR29803|c1_g6_i2	843.354	144.253	-2.54754	0.00034702	0.0849616	No	PREDICTED: 17.8 kDa class I heat shock protein-like	Sesamum indicum	NA	NA	NA	NA	NA
TR33175|c0_g3_i1	125.169	21.4429	-2.54531	0.00185746	0.233419	No	PREDICTED: peptidyl-prolyl cis-trans isomerase FKBP16-4, chloroplastic	Sesamum indicum	NA	NA	NA	NA	NA
TR32035|c0_g3_i1	170.312	29.2404	-2.54215	0.00140841	0.206717	No	alcohol acetyltransferase	Lavandula x intermedia	NA	NA	transferase activity[GO:0016740]	NA	NA
TR26100|c0_g2_i2	192.884	33.1391	-2.54113	0.00124533	0.193268	No	PREDICTED: 50S ribosomal protein 6, chloroplastic	Sesamum indicum	NA	NA	NA	NA	NA
TR34275|c0_g3_i4	4680.51	805.085	-2.53945	0.00326442	0.318049	No	chloroplast ferredoxin-NADP+ oxidoreductase precursor	Capsicum annuum	NA	oxidation-reduction process[GO:0055114]	ferredoxin-NADP+ reductase activity[GO:0004324] ; nucleotide binding[GO:0000166]	NA	map00195:Photosynthesis(reductase[ec:1.18.1.2])
TR7851|c0_g4_i1	1019.82	175.442	-2.53925	0.000377022	0.0892301	No	PREDICTED: 29 kDa ribonucleoprotein A, chloroplastic-like	Nelumbo nucifera	NA	NA	NA	NA	NA
TR29381|c1_g2_i9	135.429	23.3923	-2.53343	0.00181963	0.232786	No	NA	NA	NA	NA	NA	NA	NA
TR3571|c1_g1_i2	617.639	107.215	-2.52626	0.000407656	0.093746	No	PREDICTED: chitinase 6-like	Eucalyptus grandis	NA	organic substance metabolic process[GO:0071704]	NA	NA	NA
TR4029|c0_g1_i2	547.872	95.5186	-2.51999	0.00044844	0.0987281	No	PREDICTED: uncharacterized protein LOC105158187	Sesamum indicum	NA	NA	NA	NA	NA
TR37263|c3_g4_i2	100.546	17.5442	-2.51879	0.00223052	0.257512	No	hypothetical protein MIMGU_mgv1a004346mg	Mimulus guttatus	NA	NA	NA	membrane[GO:0016020]	NA
TR36633|c0_g3_i9	155.949	27.291	-2.51457	0.0017035	0.223983	No	PREDICTED: transcription factor MYB44-like	Sesamum indicum	NA	NA	NA	NA	NA
TR16704|c1_g1_i1	133.377	23.3923	-2.51141	0.00199088	0.240604	No	NA	NA	NA	NA	NA	NA	NA
TR35227|c1_g6_i1	188.78	33.1391	-2.5101	0.00142976	0.208236	No	PREDICTED: dehydration-responsive protein RD22-like	Populus euphratica	NA	NA	NA	NA	NA
TR35024|c0_g8_i5	521.197	91.6199	-2.5081	0.000490025	0.105832	No	SOD2	Scutellaria baicalensis	Lamiaceae	cellular response to high light intensity[GO:0071486] ; removal of superoxide radicals[GO:0019430] ; oxidation-reduction process[GO:0055114]	metal ion binding[GO:0046872] ; superoxide dismutase activity[GO:0004784]	chloroplast[GO:0009507]	NA
TR3765|c0_g1_i1	110.806	19.4936	-2.50696	0.00226932	0.259356	No	PREDICTED: ubiquitin-conjugating enzyme E2 5	Vitis vinifera	NA	protein ubiquitination[GO:0016567] ; ubiquitin-dependent protein catabolic process[GO:0006511]	ubiquitin protein ligase binding[GO:0031625] ; ubiquitin protein ligase activity[GO:0061630] ; ATP binding[GO:0005524]	cytoplasm[GO:0005737]	NA
TR4046|c0_g4_i1	110.806	19.4936	-2.50696	0.00226932	0.258835	No	fatty acid desaturase-like protein 1, partial	Perilla frutescens var. frutescens	NA	oxidation-reduction process[GO:0055114] ; lipid metabolic process[GO:0006629]	oxidoreductase activity, acting on paired donors, with oxidation of a pair of donors resulting in the reduction of molecular oxygen to two molecules of water[GO:0016717]	integral component of membrane[GO:0016021]	NA
TR40748|c0_g2_i2	55.4028	9.74679	-2.50696	0.00154265	0.215292	No	PREDICTED: peptide transporter PTR2-like	Glycine max	NA	oligopeptide transport[GO:0006857]	transporter activity[GO:0005215]	integral component of membrane[GO:0016021]	NA
TR33176|c0_g2_i5	88.2341	15.5949	-2.50027	0.00241498	0.266356	No	NA	NA	NA	NA	NA	NA	NA
TR4081|c0_g2_i2	176.468	31.1897	-2.50027	0.00158411	0.219997	No	NA	NA	NA	NA	NA	NA	NA
TR35457|c0_g2_i3	219.559	38.9872	-2.49354	0.0012856	0.196829	No	PREDICTED: uncharacterized protein LOC105954446	Erythranthe guttatus	NA	NA	NA	NA	NA
TR37303|c0_g1_i3	262.65	46.7846	-2.48904	0.00104225	0.171596	No	PREDICTED: bifunctional nitrilase/nitrile hydratase NIT4A	Sesamum indicum	NA	NA	NA	NA	NA
TR34869|c0_g2_i1	1366.6	243.67	-2.48759	0.000580632	0.117368	No	PREDICTED: ribulose bisphosphate carboxylase/oxygenase activase, chloroplastic-like	Solanum tuberosum	NA	NA	ATP binding[GO:0005524]	NA	NA
TR35137|c0_g1_i2	818.731	146.202	-2.48543	0.00046585	0.101382	No	PREDICTED: WAT1-related protein At4g19185-like	Sesamum indicum	NA	NA	NA	NA	NA
TR38271|c0_g3_i1	141.585	25.3417	-2.48209	0.0020959	0.245462	No	NA	NA	NA	NA	NA	NA	NA
TR34869|c0_g3_i2	4949.32	888.908	-2.47712	0.00452588	0.374744	No	NA	NA	NA	NA	NA	NA	NA
TR32802|c1_g3_i2	607.379	109.164	-2.4761	0.000518342	0.109859	No	PREDICTED: LOW QUALITY PROTEIN: 4-coumarate--CoA ligase 1-like	Sesamum indicum	NA	NA	NA	NA	NA
TR33118|c0_g1_i6	346.781	62.3795	-2.47488	0.000808868	0.14448	No	putative expansin	Capsicum annuum	NA	plant-type cell wall organization[GO:0009664]	NA	extracellular region[GO:0005576] ; cell wall[GO:0005618] ; membrane[GO:0016020]	NA
TR38803|c0_g6_i6	400.132	72.1263	-2.47188	0.000718247	0.134644	No	cytochrome P450 CYP76A35	Salvia miltiorrhiza	NA	oxidation-reduction process[GO:0055114]	heme binding[GO:0020037] ; oxidoreductase activity, acting on paired donors, with incorporation or reduction of molecular oxygen[GO:0016705] ; monooxygenase activity[GO:0004497] ; iron ion binding[GO:0005506]	integral component of membrane[GO:0016021]	NA
TR2280|c0_g1_i1	853.614	153.999	-2.47066	0.00050081	0.107345	No	PREDICTED: photosystem II core complex proteins psbY, chloroplastic-like	Sesamum indicum	NA	NA	NA	NA	NA
TR25751|c2_g1_i1	129.273	23.3923	-2.46632	0.0023867	0.264263	No	PREDICTED: uncharacterized protein LOC105172028	Sesamum indicum	NA	NA	NA	NA	NA
TR8004|c0_g5_i1	215.455	38.9872	-2.46632	0.00145855	0.210807	No	PREDICTED: GDSL esterase/lipase At5g33370-like	Sesamum indicum	NA	NA	NA	NA	NA
TR33100|c0_g1_i7	515.041	93.5692	-2.46058	0.000612655	0.121676	No	PREDICTED: aluminum-activated malate transporter 4-like	Sesamum indicum	NA	NA	NA	NA	NA
TR35734|c0_g1_i6	673.042	122.81	-2.45427	0.00055277	0.11335	No	PREDICTED: uncharacterized protein LOC105177167	Sesamum indicum	NA	NA	NA	NA	NA
TR37696|c2_g2_i2	1196.29	218.328	-2.454	0.000614337	0.121585	No	PREDICTED: desumoylating isopeptidase 1-like	Sesamum indicum	NA	NA	NA	NA	NA
TR39365|c0_g5_i1	373.456	68.2276	-2.45251	0.000831223	0.147085	No	PREDICTED: peroxisomal adenine nucleotide carrier 1-like	Sesamum indicum	NA	NA	NA	NA	NA
TR3582|c0_g3_i4	1311.2	239.771	-2.45116	0.000665115	0.128065	No	hypothetical protein M569_07040, partial	Genlisea aurea	NA	NA	NA	NA	NA
TR31449|c0_g1_i4	330.365	60.4301	-2.45072	0.000936092	0.158247	No	NA	NA	NA	NA	NA	NA	NA
TR3678|c0_g1_i2	277.014	50.6833	-2.45038	0.00113794	0.183625	No	unnamed protein product	Coffea canephora	NA	metabolic process[GO:0008152]	transferase activity, transferring hexosyl groups[GO:0016758]	NA	NA
TR34929|c0_g3_i1	116.962	21.4429	-2.44746	0.00271525	0.282988	No	hypothetical protein MIMGU_mgv1a011580mg	Mimulus guttatus	NA	NA	NA	NA	NA
TR38832|c1_g6_i1	116.962	21.4429	-2.44746	0.00271525	0.283509	No	hypothetical protein MIMGU_mgv1a012754mg	Mimulus guttatus	NA	NA	NA	NA	NA
TR3036|c1_g2_i3	127.221	23.3923	-2.44323	0.00261512	0.275077	No	NA	NA	NA	NA	NA	NA	NA
TR32842|c1_g1_i1	63.6107	11.6962	-2.44323	0.00251471	0.268999	No	hypothetical protein PRUPE_ppa013836mg	Prunus persica	NA	photorespiration[GO:0009853]	NA	integral component of membrane[GO:0016021]	NA
TR40440|c1_g7_i1	63.6107	11.6962	-2.44323	0.00251471	0.268493	No	NA	NA	NA	NA	NA	NA	NA
TR2537|c1_g1_i1	381.664	70.1769	-2.44323	0.000847996	0.149124	No	hypothetical protein MIMGU_mgv1a011959mg	Mimulus guttatus	NA	NA	NA	NA	NA
TR2675|c0_g2_i6	137.481	25.3417	-2.43965	0.00249376	0.268782	No	PREDICTED: 50S ribosomal protein L17, chloroplastic	Sesamum indicum	NA	NA	NA	NA	NA
TR28161|c2_g2_i1	137.481	25.3417	-2.43965	0.00249376	0.269293	No	NA	NA	NA	NA	NA	NA	NA
TR40516|c0_g3_i1	147.741	27.291	-2.43657	0.00236702	0.262596	No	hypothetical protein MIMGU_mgv1a001196mg	Mimulus guttatus	NA	metabolic process[GO:0008152]	catalytic activity[GO:0003824]	NA	NA
TR7467|c0_g1_i2	231.871	42.8859	-2.43475	0.00150662	0.212351	No	PREDICTED: WEB family protein At5g55860-like	Sesamum indicum	NA	NA	NA	NA	NA
TR40516|c0_g1_i1	1337.88	247.569	-2.43404	0.000732053	0.136332	No	PREDICTED: stachyose synthase	Sesamum indicum	NA	NA	NA	NA	NA
TR30936|c0_g4_i2	84.1302	15.5949	-2.43155	0.0030518	0.30735	No	PREDICTED: probable serine/threonine-protein kinase At1g01540	Sesamum indicum	NA	NA	NA	NA	NA
TR2350|c0_g2_i3	84.1302	15.5949	-2.43155	0.0030518	0.306806	No	NA	NA	NA	NA	NA	NA	NA
TR3602|c1_g1_i8	188.78	35.0885	-2.42764	0.0019415	0.236144	No	NA	NA	NA	NA	NA	NA	NA
TR40302|c5_g3_i3	199.04	37.0378	-2.42599	0.00185317	0.233915	No	hypothetical protein MIMGU_mgv1a010239mg	Mimulus guttatus	NA	metabolic process[GO:0008152]	catalytic activity[GO:0003824]	NA	NA
TR37039|c0_g4_i1	104.65	19.4936	-2.4245	0.0030614	0.307228	No	PREDICTED: serine/arginine-rich splicing factor RS40 isoform X2	Sesamum indicum	NA	NA	NA	NA	NA
TR37841|c0_g6_i2	219.559	40.9365	-2.42315	0.00168028	0.224041	No	NA	NA	NA	NA	NA	NA	NA
TR43780|c0_g5_i5	396.028	74.0756	-2.41853	0.00091217	0.155126	No	NA	NA	NA	NA	NA	NA	NA
TR3950|c0_g1_i2	196.988	37.0378	-2.41104	0.00197987	0.239784	No	PREDICTED: thiosulfate sulfurtransferase 16, chloroplastic	Sesamum indicum	NA	NA	NA	NA	NA
TR32802|c1_g3_i4	476.054	89.6705	-2.40842	0.000818699	0.145777	No	NA	NA	NA	NA	NA	NA	NA
TR39171|c0_g3_i6	496.574	93.5692	-2.4079	0.000795524	0.142995	No	hypothetical protein MIMGU_mgv1a004806mg	Mimulus guttatus	NA	oxidation-reduction process[GO:0055114]	heme binding[GO:0020037] ; oxidoreductase activity, acting on paired donors, with incorporation or reduction of molecular oxygen[GO:0016705] ; monooxygenase activity[GO:0004497] ; iron ion binding[GO:0005506]	NA	NA
TR35811|c0_g1_i1	289.326	54.582	-2.4062	0.00129127	0.197165	No	hypothetical protein MIMGU_mgv1a012525mg	Mimulus guttatus	NA	NA	NA	NA	NA
TR23787|c1_g1_i3	640.21	120.86	-2.40521	0.000703741	0.132362	No	PREDICTED: dnaJ homolog subfamily B member 7-like isoform X1	Sesamum indicum	NA	NA	NA	NA	NA
TR7606|c0_g2_i1	6188.7	1169.62	-2.4036	0.0087649	0.519682	No	hypothetical protein MIMGU_mgv1a015066mg	Mimulus guttatus	NA	NA	NA	integral component of membrane[GO:0016021]	NA
TR7708|c3_g2_i3	82.0783	15.5949	-2.39593	0.0034375	0.328157	No	NA	NA	NA	NA	NA	NA	NA
TR38668|c0_g1_i2	92.3381	17.5442	-2.39593	0.00342835	0.327835	No	hypothetical protein JCGZ_08750	Jatropha curcas	NA	protein ubiquitination[GO:0016567]	ligase activity[GO:0016874] ; ubiquitin-protein transferase activity[GO:0004842]	NA	NA
TR34174|c0_g8_i1	102.598	19.4936	-2.39593	0.00338616	0.326549	No	PREDICTED: uncharacterized protein LOC105165747	Sesamum indicum	NA	NA	NA	NA	NA
TR35332|c0_g8_i2	123.117	23.3923	-2.39593	0.00314421	0.312228	No	hypothetical protein MIMGU_mgv1a014477mg	Mimulus guttatus	NA	NA	NA	integral component of membrane[GO:0016021]	NA
TR43249|c1_g8_i1	61.5587	11.6962	-2.39593	0.00284935	0.29214	No	cellulose synthase 1B	Salix miyabeana	NA	cellulose biosynthetic process[GO:0030244]	cellulose synthase (UDP-forming) activity[GO:0016760]	integral component of membrane[GO:0016021]	map00500:Starch and sucrose metabolism(synthase (UDP-forming)[ec:2.4.1.12])
TR41934|c0_g6_i2	174.416	33.1391	-2.39593	0.00234376	0.263099	No	PREDICTED: protein ECERIFERUM 3-like	Fragaria vesca subsp. vesca	NA	NA	NA	NA	NA
TR32106|c0_g1_i2	205.196	38.9872	-2.39593	0.00200699	0.241523	No	PREDICTED: 14 kDa zinc-binding protein	Sesamum indicum	NA	NA	NA	NA	NA
TR39049|c0_g8_i1	215.455	40.9365	-2.39593	0.00190251	0.234922	No	xyloglucan endotransglucosylase XET3	Capsicum annuum	NA	cell wall organization[GO:0071555] ; xyloglucan metabolic process[GO:0010411] ; cell wall biogenesis[GO:0042546]	xyloglucan:xyloglucosyl transferase activity[GO:0016762] ; hydrolase activity, hydrolyzing O-glycosyl compounds[GO:0004553]	cell wall[GO:0005618] ; apoplast[GO:0048046]	NA
TR43406|c1_g1_i1	297.534	56.5314	-2.39593	0.00130487	0.198175	No	PREDICTED: AMP deaminase-like isoform X2	Sesamum indicum	NA	NA	NA	NA	NA
TR43015|c0_g1_i2	574.548	109.164	-2.39593	0.000767491	0.140174	No	NA	NA	NA	NA	NA	NA	NA
TR29776|c1_g7_i2	1366.6	261.214	-2.38729	0.000924385	0.156734	No	PREDICTED: mechanosensitive ion channel protein 10-like	Sesamum indicum	NA	NA	NA	NA	NA
TR36489|c0_g1_i2	954.16	183.24	-2.3805	0.00078061	0.141208	No	cytochrome P450 CYP81Q43	Salvia miltiorrhiza	NA	oxidation-reduction process[GO:0055114]	heme binding[GO:0020037] ; oxidoreductase activity, acting on paired donors, with incorporation or reduction of molecular oxygen[GO:0016705] ; monooxygenase activity[GO:0004497] ; iron ion binding[GO:0005506]	NA	NA
TR42531|c0_g1_i5	4930.85	949.338	-2.37684	0.00632788	0.450978	No	NA	NA	NA	NA	NA	NA	NA
TR17269|c0_g2_i1	4007.47	771.946	-2.37612	0.00441102	0.368999	No	PREDICTED: photosystem II 10 kDa polypeptide, chloroplastic	Sesamum indicum	NA	NA	NA	NA	NA
TR20605|c0_g1_i1	131.325	25.3417	-2.37356	0.00324825	0.317017	No	NA	NA	NA	NA	NA	NA	NA
TR8274|c0_g1_i1	262.65	50.6833	-2.37356	0.00164354	0.223337	No	NA	NA	NA	NA	NA	NA	NA
TR35332|c0_g11_i1	252.391	48.734	-2.37266	0.00172848	0.226743	No	PREDICTED: uncharacterized protein LOC105168768	Sesamum indicum	NA	NA	NA	NA	NA
TR32393|c0_g1_i3	373.456	72.1263	-2.37234	0.00116773	0.187367	No	NA	NA	NA	NA	NA	NA	NA
TR34529|c0_g3_i3	121.065	23.3923	-2.37168	0.00345017	0.326078	No	PREDICTED: FAM10 family protein At4g22670	Sesamum indicum	NA	NA	NA	NA	NA
TR38713|c1_g2_i1	242.131	46.7846	-2.37168	0.00182205	0.232571	No	PREDICTED: 28 kDa ribonucleoprotein, chloroplastic-like	Sesamum indicum	NA	NA	NA	NA	NA
TR38038|c0_g5_i1	100.546	19.4936	-2.36678	0.00374744	0.340574	No	PREDICTED: uncharacterized protein LOC105163785	Sesamum indicum	NA	NA	NA	NA	NA
TR8118|c1_g2_i10	190.832	37.0378	-2.36523	0.00241737	0.266103	No	NA	NA	NA	NA	NA	NA	NA
TR37921|c0_g1_i4	180.572	35.0885	-2.36351	0.00255524	0.27129	No	hypothetical protein MIMGU_mgv1a007161mg	Mimulus guttatus	NA	dephosphorylation[GO:0016311] ; carbohydrate metabolic process[GO:0005975]	fructose 1,6-bisphosphate 1-phosphatase activity[GO:0042132]	NA	map00030:Pentose phosphate pathway(hexose diphosphatase[ec:3.1.3.11]) ; map01130:Biosynthesis of antibiotics(hexose diphosphatase[ec:3.1.3.11]) ; map00051:Fructose and mannose metabolism(hexose diphosphatase[ec:3.1.3.11]) ; map00710:Carbon fixation in photosynthetic organisms(hexose diphosphatase[ec:3.1.3.11]) ; map00010:Glycolysis / Gluconeogenesis(hexose diphosphatase[ec:3.1.3.11]) ; map00680:M…
TR43590|c1_g7_i1	340.625	66.2782	-2.36158	0.00132077	0.199524	No	NA	NA	NA	NA	NA	NA	NA
TR33020|c0_g6_i4	330.365	64.3288	-2.36052	0.0013611	0.202918	No	NA	NA	NA	NA	NA	NA	NA
TR7708|c3_g5_i1	80.0263	15.5949	-2.3594	0.0038769	0.348436	No	hypothetical protein MIMGU_mgv1a011200mg	Mimulus guttatus	NA	metabolic process[GO:0008152]	amino acid binding[GO:0016597]	NA	NA
TR7894|c0_g2_i3	80.0263	15.5949	-2.3594	0.0038769	0.348989	No	hypothetical protein MIMGU_mgv1a009159mg	Mimulus guttatus	NA	metabolic process[GO:0008152]	coenzyme binding[GO:0050662] ; catalytic activity[GO:0003824]	NA	NA
TR8267|c1_g4_i2	629.951	122.81	-2.35882	0.000874037	0.151823	No	PREDICTED: uncharacterized protein LOC106770165 isoform X1	Vigna radiata var. radiata	NA	NA	NA	NA	NA
TR43014|c4_g4_i2	229.819	44.8353	-2.35779	0.00204121	0.241045	No	SAHH1, partial	Matthiola fruticulosa subsp. valesiaca	NA	one-carbon metabolic process[GO:0006730]	adenosylhomocysteinase activity[GO:0004013]	NA	map00270:Cysteine and methionine metabolism(S-adenosylhomocysteine synthase[ec:3.3.1.1])
TR7759|c1_g1_i1	69.7665	13.6455	-2.35411	0.00374671	0.341053	No	hypothetical protein MIMGU_mgv1a014037mg	Mimulus guttatus	NA	ATP synthesis coupled proton transport[GO:0015986]	proton-transporting ATPase activity, rotational mechanism[GO:0046961] ; proton-transporting ATP synthase activity, rotational mechanism[GO:0046933]	proton-transporting ATP synthase complex, catalytic core F(1)[GO:0045261]	NA
TR44143|c0_g1_i2	279.066	54.582	-2.35411	0.0016552	0.22385	No	NA	NA	NA	NA	NA	NA	NA
TR29089|c0_g1_i1	328.313	64.3288	-2.35153	0.00141997	0.207875	No	PREDICTED: uncharacterized protein LOC105967667	Erythranthe guttatus	NA	NA	NA	NA	NA
TR42437|c0_g3_i1	108.754	21.4429	-2.34249	0.00400079	0.349614	No	hypothetical protein MIMGU_mgv1a006463mg	Mimulus guttatus	NA	methylation[GO:0032259]	methyltransferase activity[GO:0008168]	integral component of membrane[GO:0016021]	NA
TR29089|c0_g1_i8	326.261	64.3288	-2.34249	0.00148166	0.210927	No	NA	NA	NA	NA	NA	NA	NA
TR23138|c0_g1_i1	1740.06	343.087	-2.34249	0.00144061	0.208746	No	NA	NA	NA	NA	NA	NA	NA
TR43100|c0_g1_i1	158.001	31.1897	-2.34079	0.00312145	0.31051	No	NA	NA	NA	NA	NA	NA	NA
TR34353|c2_g2_i2	502.729	99.4173	-2.33821	0.00107265	0.175079	No	unnamed protein product	Coffea canephora	NA	protein folding[GO:0006457]	NA	cytoplasm[GO:0005737]	NA
TR26416|c1_g1_i2	24953.8	4935.78	-2.33791	0.113491	1.07458	No	PREDICTED: light-regulated protein-like	Sesamum indicum	NA	NA	NA	NA	NA
TR36892|c0_g2_i3	3826.9	758.301	-2.33533	0.00473068	0.38332	No	plastid glutamine synthetase	Vigna radiata	NA	glutamine biosynthetic process[GO:0006542]	glutamate-ammonia ligase activity[GO:0004356] ; ATP binding[GO:0005524]	NA	map00220:Arginine biosynthesis(ligase[ec:6.3.1.2]) ; map00630:Glyoxylate and dicarboxylate metabolism(ligase[ec:6.3.1.2]) ; map00250:Alanine, aspartate and glutamate metabolism(ligase[ec:6.3.1.2]) ; map00910:Nitrogen metabolism(ligase[ec:6.3.1.2])
TR38425|c0_g1_i3	88.2341	17.5442	-2.33034	0.00429004	0.362078	No	PREDICTED: uncharacterized protein LOC104089941	Nicotiana tomentosiformis	NA	NA	NA	NA	NA
TR30975|c0_g2_i1	254.443	50.6833	-2.32776	0.00203672	0.241016	No	NA	NA	NA	NA	NA	NA	NA
TR25236|c0_g1_i2	486.314	97.4679	-2.31889	0.00119309	0.188772	No	PREDICTED: peptidyl-prolyl cis-trans isomerase FKBP62	Sesamum indicum	NA	NA	NA	NA	NA
TR3126|c0_g1_i2	1436.37	288.505	-2.31576	0.00133458	0.200544	No	PREDICTED: CBS domain-containing protein CBSX1, chloroplastic	Sesamum indicum	NA	NA	NA	NA	NA
TR3950|c0_g1_i3	601.223	120.86	-2.31456	0.00108447	0.176502	No	hypothetical protein MIMGU_mgv1a014589mg	Mimulus guttatus	NA	NA	NA	NA	NA
TR37895|c0_g1_i1	1563.59	315.796	-2.3078	0.00149709	0.211533	No	PREDICTED: acetate/butyrate--CoA ligase AAE7, peroxisomal	Sesamum indicum	NA	NA	NA	NA	NA
TR2228|c0_g2_i2	357.04	72.1263	-2.30749	0.00158891	0.220126	No	PREDICTED: uncharacterized protein LOC105160245	Sesamum indicum	NA	NA	NA	NA	NA
TR38592|c0_g1_i1	96.442	19.4936	-2.30666	0.004609	0.377771	No	PREDICTED: dnaJ homolog 1, mitochondrial-like	Sesamum indicum	NA	NA	NA	NA	NA
TR41465|c0_g6_i1	192.884	38.9872	-2.30666	0.0029637	0.301687	No	PREDICTED: probable transporter mch1	Sesamum indicum	NA	NA	NA	NA	NA
TR33275|c0_g1_i2	915.173	185.189	-2.30504	0.0010939	0.177527	No	PREDICTED: uncharacterized protein LOC105171048	Sesamum indicum	NA	NA	NA	NA	NA
TR31753|c0_g1_i6	1854.97	376.226	-2.30172	0.00185722	0.233907	No	PREDICTED: PGR5-like protein 1A, chloroplastic	Sesamum indicum	NA	NA	NA	NA	NA
TR36111|c1_g14_i4	268.806	54.582	-2.30007	0.00213216	0.247666	No	PREDICTED: uncharacterized protein LOC105968875	Erythranthe guttatus	NA	NA	NA	NA	NA
TR31615|c0_g3_i1	2129.93	432.758	-2.29918	0.00224469	0.258622	No	oxygen-evolving enhancer protein 3	Glycine max	NA	photosynthesis[GO:0015979]	calcium ion binding[GO:0005509]	photosystem II oxygen evolving complex[GO:0009654] ; extrinsic component of membrane[GO:0019898]	NA
TR35587|c1_g1_i3	412.443	83.8224	-2.29879	0.00146781	0.210538	No	PREDICTED: LOW QUALITY PROTEIN: phenylalanine ammonia-lyase-like	Sesamum indicum	NA	NA	NA	NA	NA
TR36752|c0_g1_i6	143.637	29.2404	-2.29639	0.00395015	0.346789	No	NA	NA	NA	NA	NA	NA	NA
TR43283|c0_g2_i1	57.4548	11.6962	-2.29639	0.00365913	0.336314	No	PREDICTED: coatomer subunit beta-1-like	Nicotiana sylvestris	NA	NA	NA	NA	NA
TR38942|c1_g1_i6	496.574	101.367	-2.29242	0.00132017	0.199966	No	cytochrome P450 CYP714G13	Salvia miltiorrhiza	NA	oxidation-reduction process[GO:0055114]	heme binding[GO:0020037] ; oxidoreductase activity, acting on paired donors, with incorporation or reduction of molecular oxygen[GO:0016705] ; monooxygenase activity[GO:0004497] ; iron ion binding[GO:0005506]	integral component of membrane[GO:0016021]	NA
TR42502|c1_g1_i2	648.418	132.556	-2.29032	0.00117992	0.187734	No	PREDICTED: linoleate 13S-lipoxygenase 2-1, chloroplastic-like	Sesamum indicum	NA	NA	NA	NA	NA
TR33275|c0_g1_i3	943.9	192.987	-2.29013	0.00117971	0.188226	No	PREDICTED: uncharacterized protein LOC105171048	Sesamum indicum	NA	NA	NA	NA	NA
TR33176|c0_g2_i4	104.65	21.4429	-2.28699	0.0048715	0.390827	No	NA	NA	NA	NA	NA	NA	NA
TR19383|c0_g1_i2	209.3	42.8859	-2.28699	0.00294128	0.299942	No	adenosylhomocysteinase, partial	Genlisea aurea	NA	one-carbon metabolic process[GO:0006730]	adenosylhomocysteinase activity[GO:0004013]	NA	map00270:Cysteine and methionine metabolism(S-adenosylhomocysteine synthase[ec:3.3.1.1])
TR42812|c3_g4_i3	911.069	187.138	-2.28345	0.00120589	0.189215	No	PREDICTED: fructose-1,6-bisphosphatase, cytosolic	Sesamum indicum	NA	NA	NA	NA	NA
TR42297|c2_g4_i3	738.704	152.05	-2.28045	0.00120593	0.1887	No	hypothetical protein M569_15756, partial	Genlisea aurea	NA	NA	NA	NA	NA
TR24798|c0_g2_i1	1210.65	249.518	-2.27857	0.00138829	0.205354	No	NA	NA	NA	NA	NA	NA	NA
TR30871|c0_g1_i1	1124.47	231.974	-2.27721	0.00133945	0.200744	No	heat shock protein 70	Genlisea aurea	NA	NA	ATP binding[GO:0005524]	NA	NA
TR39234|c1_g4_i7	94.39	19.4936	-2.27563	0.00512366	0.401974	No	hypothetical protein M569_13838, partial	Genlisea aurea	NA	protein folding[GO:0006457] ; protein peptidyl-prolyl isomerization[GO:0000413]	peptidyl-prolyl cis-trans isomerase activity[GO:0003755]	NA	NA
TR37143|c0_g2_i1	47.195	9.74679	-2.27563	0.00246461	0.268699	No	NA	NA	NA	NA	NA	NA	NA
TR2666|c1_g2_i7	254.443	52.6327	-2.27331	0.00250981	0.26898	No	PREDICTED: zinc finger protein ZAT10-like	Nicotiana tomentosiformis	NA	NA	NA	NA	NA
TR31194|c1_g6_i1	112.858	23.3923	-2.2704	0.00502698	0.398239	No	hypothetical protein M569_03153	Genlisea aurea	NA	glycine decarboxylation via glycine cleavage system[GO:0019464]	NA	glycine cleavage complex[GO:0005960]	NA
TR40040|c0_g1_i1	112.858	23.3923	-2.2704	0.00502698	0.397685	No	PREDICTED: probable serine/threonine-protein kinase At1g54610	Prunus mume	NA	NA	NA	NA	NA
TR4046|c0_g6_i1	65.6626	13.6455	-2.26665	0.00483397	0.388365	No	NA	NA	NA	NA	NA	NA	NA
TR34746|c0_g2_i2	806.419	167.645	-2.26612	0.00128433	0.197166	No	PREDICTED: uncharacterized protein LOC105174843	Sesamum indicum	NA	NA	NA	NA	NA
TR39359|c0_g3_i1	84.1302	17.5442	-2.26163	0.00539962	0.415025	No	NA	NA	NA	NA	NA	NA	NA
TR32682|c4_g2_i3	420.651	87.7211	-2.26163	0.00169087	0.223356	No	PREDICTED: bifunctional epoxide hydrolase 2-like	Nicotiana tomentosiformis	NA	NA	NA	NA	NA
TR32192|c3_g1_i2	354.989	74.0756	-2.2607	0.00193486	0.236349	No	hypothetical protein MIMGU_mgv1a006198mg	Mimulus guttatus	NA	pectin catabolic process[GO:0045490]	metal ion binding[GO:0046872] ; pectate lyase activity[GO:0030570]	NA	map00040:Pentose and glucuronate interconversions(lyase[ec:4.2.2.2])
TR33275|c0_g1_i1	354.989	74.0756	-2.2607	0.00193486	0.236858	No	PREDICTED: uncharacterized protein LOC105171045 isoform X2	Sesamum indicum	NA	NA	NA	NA	NA
TR39227|c1_g2_i2	297.534	62.3795	-2.25391	0.00230185	0.260452	No	PREDICTED: F-box protein At3g07870-like	Sesamum indicum	NA	NA	NA	NA	NA
TR30631|c0_g1_i4	176.468	37.0378	-2.25234	0.00388316	0.348448	No	hypothetical protein MIMGU_mgv1a015689mg	Mimulus guttatus	NA	metal ion transport[GO:0030001]	metal ion binding[GO:0046872]	NA	NA
TR7805|c1_g8_i5	352.937	74.0756	-2.25234	0.0020112	0.241519	No	PREDICTED: photosystem II 22 kDa protein, chloroplastic-like	Cicer arietinum	NA	NA	NA	NA	NA
TR33729|c0_g2_i6	1467.15	307.999	-2.25202	0.00180546	0.232544	No	PREDICTED: chlorophyll a-b binding protein, chloroplastic	Sesamum indicum	NA	NA	NA	NA	NA
TR31131|c0_g1_i3	231.871	48.734	-2.25032	0.00302626	0.305319	No	PREDICTED: uncharacterized protein LOC105161139	Sesamum indicum	NA	NA	NA	NA	NA
TR31615|c0_g2_i3	1054.71	222.227	-2.24674	0.00149176	0.211834	No	PREDICTED: oxygen-evolving enhancer protein 3, chloroplastic	Sesamum indicum	NA	NA	NA	NA	NA
TR43357|c0_g1_i1	3274.92	690.073	-2.24664	0.0051241	0.401454	No	PREDICTED: alpha-mannosidase-like	Sesamum indicum	NA	NA	NA	NA	NA
TR35734|c0_g1_i4	675.094	142.303	-2.24612	0.00142425	0.207966	No	PREDICTED: uncharacterized protein LOC105177167	Sesamum indicum	NA	NA	NA	NA	NA
TR34082|c0_g1_i4	989.043	208.581	-2.24542	0.0014649	0.210652	No	PREDICTED: ribulose-phosphate 3-epimerase, chloroplastic	Sesamum indicum	NA	NA	NA	NA	NA
TR38954|c0_g1_i2	92.3381	19.4936	-2.24393	0.00570465	0.429179	No	PREDICTED: uncharacterized protein LOC105178545	Sesamum indicum	NA	NA	NA	NA	NA
TR27815|c2_g1_i6	73.8704	15.5949	-2.24393	0.00560273	0.423756	No	NA	NA	NA	NA	NA	NA	NA
TR39328|c1_g3_i1	73.8704	15.5949	-2.24393	0.00560273	0.423192	No	glutathione reductase, partial	Dimocarpus longan	NA	oxidation-reduction process[GO:0055114]	oxidoreductase activity[GO:0016491]	NA	NA
TR38097|c0_g4_i2	129.273	27.291	-2.24393	0.00510185	0.401371	No	PREDICTED: uncharacterized protein LOC105164004	Sesamum indicum	NA	NA	NA	NA	NA
TR36645|c2_g1_i1	55.4028	11.6962	-2.24393	0.00414734	0.35585	No	PREDICTED: glucan endo-1,3-beta-glucosidase-like	Sesamum indicum	NA	NA	NA	NA	NA
TR39740|c2_g4_i1	55.4028	11.6962	-2.24393	0.00414734	0.355314	No	PREDICTED: delta(8)-fatty-acid desaturase-like	Sesamum indicum	NA	NA	NA	NA	NA
TR2653|c2_g1_i6	203.144	42.8859	-2.24393	0.00354472	0.3328	No	PREDICTED: uncharacterized protein LOC105158286	Sesamum indicum	NA	NA	NA	NA	NA
TR35124|c0_g1_i1	277.014	58.4808	-2.24393	0.00256833	0.271159	No	hypothetical protein MIMGU_mgv1a006001mg	Mimulus guttatus	NA	carbohydrate metabolic process[GO:0005975]	hydrolase activity, hydrolyzing O-glycosyl compounds[GO:0004553]	NA	NA
TR33100|c0_g1_i6	517.093	109.164	-2.24393	0.00158956	0.21968	No	PREDICTED: aluminum-activated malate transporter 4-like	Sesamum indicum	NA	NA	NA	NA	NA
TR35347|c1_g2_i4	229.819	48.734	-2.2375	0.00320398	0.31486	No	NA	NA	NA	NA	NA	NA	NA
TR39026|c0_g1_i2	1165.51	247.569	-2.23506	0.0016506	0.223761	No	hypothetical protein MIMGU_mgv1a011436mg	Mimulus guttatus	NA	NA	NA	NA	NA
TR32829|c0_g2_i2	330.365	70.1769	-2.23499	0.00227006	0.2584	No	malate dehydrogenase	Perilla frutescens	Lamiaceae	carbohydrate metabolic process[GO:0005975] ; malate metabolic process[GO:0006108] ; tricarboxylic acid cycle[GO:0006099]	L-malate dehydrogenase activity[GO:0030060]	NA	map00630:Glyoxylate and dicarboxylate metabolism(dehydrogenase[ec:1.1.1.37]) ; map01130:Biosynthesis of antibiotics(dehydrogenase[ec:1.1.1.37]) ; map00720:Carbon fixation pathways in prokaryotes(dehydrogenase[ec:1.1.1.37]) ; map00020:Citrate cycle (TCA cycle)(dehydrogenase[ec:1.1.1.37]) ; map00620:Pyruvate metabolism(dehydrogenase[ec:1.1.1.37]) ; map00270:Cysteine and methionine metabolism(dehydr…
TR30882|c0_g2_i1	155.949	33.1391	-2.23447	0.00457387	0.377069	No	PREDICTED: phosphoethanolamine N-methyltransferase-like isoform X2	Sesamum indicum	NA	NA	NA	NA	NA
TR37831|c2_g6_i1	1403.54	298.252	-2.23447	0.00187921	0.233569	No	PREDICTED: UDP-glucose 4-epimerase GEPI48	Sesamum indicum	NA	NA	NA	NA	NA
TR26987|c0_g1_i9	430.911	91.6199	-2.23366	0.00186841	0.233247	No	NA	NA	NA	NA	NA	NA	NA
TR37991|c0_g3_i2	705.873	150.101	-2.23348	0.00149586	0.211886	No	malate dehydrogenase, glyoxysomal	Genlisea aurea	NA	carbohydrate metabolic process[GO:0005975] ; malate metabolic process[GO:0006108] ; tricarboxylic acid cycle[GO:0006099]	L-malate dehydrogenase activity[GO:0030060]	NA	map00630:Glyoxylate and dicarboxylate metabolism(dehydrogenase[ec:1.1.1.37]) ; map01130:Biosynthesis of antibiotics(dehydrogenase[ec:1.1.1.37]) ; map00720:Carbon fixation pathways in prokaryotes(dehydrogenase[ec:1.1.1.37]) ; map00020:Citrate cycle (TCA cycle)(dehydrogenase[ec:1.1.1.37]) ; map00620:Pyruvate metabolism(dehydrogenase[ec:1.1.1.37]) ; map00270:Cysteine and methionine metabolism(dehydr…
TR25849|c0_g5_i1	137.481	29.2404	-2.2332	0.00506816	0.399828	No	hypothetical protein MIMGU_mgv1a002918mg	Mimulus guttatus	NA	ATP transport[GO:0015867] ; ADP transport[GO:0015866]	ATP:ADP antiporter activity[GO:0005471] ; ATP binding[GO:0005524]	integral component of membrane[GO:0016021]	NA
TR37701|c0_g1_i2	1502.03	319.695	-2.23215	0.00201165	0.241063	No	PREDICTED: putative formamidase C869.04 isoform X2	Sesamum indicum	NA	NA	NA	NA	NA
TR8183|c0_g1_i2	119.013	25.3417	-2.23154	0.00558309	0.422833	No	unnamed protein product	Vitis vinifera	NA	NA	NA	NA	NA
TR27949|c0_g1_i1	219.559	46.7846	-2.23051	0.0034469	0.327404	No	PREDICTED: uncharacterized protein LOC105160234 isoform X2	Sesamum indicum	NA	NA	NA	NA	NA
TR32114|c0_g1_i3	82.0783	17.5442	-2.226	0.00607054	0.440937	No	hypothetical protein MIMGU_mgv1a006903mg	Mimulus guttatus	NA	carbohydrate metabolic process[GO:0005975]	racemase and epimerase activity, acting on carbohydrates and derivatives[GO:0016857]	integral component of membrane[GO:0016021]	NA
TR37039|c0_g5_i3	63.6107	13.6455	-2.22084	0.0054977	0.419161	No	PREDICTED: serine/arginine-rich splicing factor RS40 isoform X2	Sesamum indicum	NA	NA	NA	NA	NA
TR28778|c0_g1_i1	190.832	40.9365	-2.22084	0.00407706	0.354099	No	NA	NA	NA	NA	NA	NA	NA
TR25272|c0_g1_i1	644.314	138.404	-2.21887	0.00162349	0.223282	No	NA	NA	NA	NA	NA	NA	NA
TR38592|c1_g1_i1	217.507	46.7846	-2.21696	0.00365678	0.336643	No	PREDICTED: dnaJ homolog 1, mitochondrial-like	Erythranthe guttatus	NA	NA	NA	NA	NA
TR34687|c0_g1_i4	217.507	46.7846	-2.21696	0.00365678	0.33719	No	hypothetical protein MIMGU_mgv1a010345mg	Mimulus guttatus	NA	proteolysis[GO:0006508]	serine-type endopeptidase activity[GO:0004252]	NA	NA
TR34270|c2_g2_i1	153.897	33.1391	-2.21536	0.00493768	0.393359	No	NA	NA	NA	NA	NA	NA	NA
TR41663|c1_g1_i1	615.587	132.556	-2.21536	0.00166943	0.225238	No	PREDICTED: chaperonin 60 subunit beta 2, chloroplastic	Nicotiana sylvestris	NA	NA	NA	NA	NA
TR29125|c1_g1_i7	859.77	185.189	-2.21495	0.0016259	0.223075	No	NA	NA	NA	NA	NA	NA	NA
TR37452|c0_g7_i2	90.2861	19.4936	-2.2115	0.00636119	0.452218	No	HPPR_SOLSCRecName: Full=Hydroxyphenylpyruvate reductase; Short=HPPR	Plectranthus scutellarioides	Lamiaceae	oxidation-reduction process[GO:0055114]	NAD binding[GO:0051287] ; hydroxyphenylpyruvate reductase activity[GO:0047995]	NA	map00130:Ubiquinone and other terpenoid-quinone biosynthesis(reductase[ec:1.1.1.237]) ; map00350:Tyrosine metabolism(reductase[ec:1.1.1.237]) ; map00360:Phenylalanine metabolism(reductase[ec:1.1.1.237]) ; map00960:Tropane, piperidine and pyridine alkaloid biosynthesis(reductase[ec:1.1.1.237])
TR38689|c1_g1_i7	90.2861	19.4936	-2.2115	0.00636119	0.451652	No	hypothetical protein CISIN_1g021726mg	Citrus sinensis	NA	oxidation-reduction process[GO:0055114]	heme binding[GO:0020037] ; oxidoreductase activity, acting on paired donors, with incorporation or reduction of molecular oxygen[GO:0016705] ; iron ion binding[GO:0005506]	NA	NA
TR43187|c2_g1_i4	135.429	29.2404	-2.2115	0.00551221	0.418582	No	hypothetical protein MIMGU_mgv1a002615mg	Mimulus guttatus	NA	transmembrane transport[GO:0055085]	NA	integral component of membrane[GO:0016021]	NA
TR34230|c0_g1_i6	180.572	38.9872	-2.2115	0.00440855	0.369336	No	hypothetical protein MIMGU_mgv1a003894mg	Mimulus guttatus	NA	transmembrane transport[GO:0055085]	NA	integral component of membrane[GO:0016021]	NA
TR3449|c0_g1_i5	523.249	113.063	-2.21037	0.00182497	0.232422	No	NA	NA	NA	NA	NA	NA	NA
TR36690|c0_g1_i4	3806.38	822.629	-2.2101	0.00734294	0.484984	No	hypothetical protein MIMGU_mgv1a024851mg	Mimulus guttatus	NA	NA	NA	NA	NA
TR34869|c0_g1_i1	8991.67	1943.51	-2.20992	0.0288791	0.785991	No	chloroplast ribulose-1,5-bisphosphate carboxylase/oxygenase activase	Solenostemon scutellarioides	NA	NA	ATP binding[GO:0005524]	NA	NA
TR6831|c0_g1_i1	260.599	56.5314	-2.2047	0.00317741	0.314426	No	PREDICTED: 30S ribosomal protein 2, chloroplastic	Sesamum indicum	NA	NA	NA	NA	NA
TR24521|c0_g1_i1	71.8185	15.5949	-2.20328	0.00634945	0.451949	No	PREDICTED: uncharacterized protein LOC105166552	Sesamum indicum	NA	NA	NA	NA	NA
TR33791|c0_g10_i4	143.637	31.1897	-2.20328	0.00542909	0.415604	No	NA	NA	NA	NA	NA	NA	NA
TR35643|c1_g7_i3	367.3	79.9237	-2.20026	0.00241196	0.26654	No	PREDICTED: protein Iojap, chloroplastic	Sesamum indicum	NA	NA	NA	NA	NA
TR40677|c0_g4_i2	295.482	64.3288	-2.19953	0.00286789	0.293512	No	PREDICTED: 3-hydroxyisobutyryl-CoA hydrolase-like protein 5	Sesamum indicum	NA	NA	NA	NA	NA
TR2592|c0_g1_i1	322.157	70.1769	-2.1987	0.00267557	0.280915	No	PREDICTED: rRNA-processing protein fcf2-like	Sesamum indicum	NA	NA	NA	NA	NA
TR3552|c0_g1_i2	572.496	124.759	-2.19812	0.0018455	0.233988	No	PREDICTED: transcription factor TCP13-like	Nicotiana tomentosiformis	NA	NA	NA	NA	NA
TR44165|c1_g12_i2	125.169	27.291	-2.19738	0.0060826	0.441249	No	predicted protein	Hordeum vulgare subsp. vulgare	NA	NA	ATP binding[GO:0005524]	NA	NA
TR38753|c0_g5_i3	357.04	77.9744	-2.19502	0.00251623	0.268151	No	NA	NA	NA	NA	NA	NA	NA
TR23940|c0_g1_i1	418.599	91.6199	-2.19184	0.00227023	0.257902	No	putative ethylene-responsive element binding protein	Salvia miltiorrhiza	NA	NA	NA	NA	NA
TR44007|c2_g7_i1	80.0263	17.5442	-2.18948	0.00683415	0.469391	No	NA	NA	NA	NA	NA	NA	NA
TR39049|c0_g8_i2	213.403	46.7846	-2.18948	0.00411798	0.35494	No	hypothetical protein MIMGU_mgv1a011220mg	Mimulus guttatus	NA	cell wall organization[GO:0071555] ; xyloglucan metabolic process[GO:0010411] ; cell wall biogenesis[GO:0042546]	xyloglucan:xyloglucosyl transferase activity[GO:0016762] ; hydrolase activity, hydrolyzing O-glycosyl compounds[GO:0004553]	cell wall[GO:0005618] ; apoplast[GO:0048046]	NA
TR32055|c0_g1_i1	373.456	81.8731	-2.18948	0.00248923	0.269316	No	PREDICTED: uncharacterized protein LOC105165185	Sesamum indicum	NA	NA	NA	NA	NA
TR28962|c0_g1_i4	888.497	194.936	-2.18837	0.00184019	0.233836	No	PREDICTED: photosystem II repair protein PSB27-H1, chloroplastic	Vigna radiata var. radiata	NA	NA	NA	NA	NA
TR3010|c0_g1_i3	274.962	60.4301	-2.18589	0.00323541	0.316307	No	PREDICTED: glycine-rich protein 2-like	Sesamum indicum	NA	NA	NA	NA	NA
TR31880|c4_g4_i1	718.185	157.898	-2.18536	0.00184774	0.23375	No	hypothetical protein B456_007G095300	Gossypium raimondii	NA	peroxisome fission[GO:0016559]	NA	integral component of peroxisomal membrane[GO:0005779]	NA
TR43264|c0_g5_i2	194.936	42.8859	-2.18442	0.0045585	0.376348	No	hypothetical protein MIMGU_mgv1a002033mg	Mimulus guttatus	NA	lipid metabolic process[GO:0006629]	hydrolase activity[GO:0016787]	integral component of membrane[GO:0016021]	NA
TR38038|c0_g2_i5	168.26	37.0378	-2.18363	0.00513406	0.401127	No	NA	NA	NA	NA	NA	NA	NA
TR34687|c0_g1_i1	141.585	31.1897	-2.18253	0.00588634	0.434221	No	hypothetical protein MIMGU_mgv1a010345mg	Mimulus guttatus	NA	proteolysis[GO:0006508]	serine-type endopeptidase activity[GO:0004252]	NA	NA
TR39153|c0_g1_i3	229.819	50.6833	-2.18092	0.00394818	0.347153	No	NA	NA	NA	NA	NA	NA	NA
TR2350|c0_g1_i2	203.144	44.8353	-2.1798	0.00446697	0.371491	No	major latex-like protein 1	Plantago major	NA	NA	NA	NA	NA
TR35210|c0_g1_i9	785.899	173.493	-2.17947	0.00189032	0.233926	No	PREDICTED: peptidyl-prolyl cis-trans isomerase CYP26-2, chloroplastic	Sesamum indicum	NA	NA	NA	NA	NA
TR23992|c0_g1_i2	149.793	33.1391	-2.17636	0.00576197	0.431206	No	hypothetical protein MIMGU_mgv1a016065mg	Mimulus guttatus	NA	NA	NA	NA	NA
TR43260|c1_g2_i5	272.91	60.4301	-2.17509	0.00339636	0.326977	No	PREDICTED: protein NRT1/ PTR FAMILY 2.11-like	Nicotiana tomentosiformis	NA	NA	NA	NA	NA
TR31753|c0_g1_i5	607.379	134.506	-2.17493	0.00199952	0.241135	No	PREDICTED: PGR5-like protein 1A, chloroplastic	Sesamum indicum	NA	NA	NA	NA	NA
TR38704|c1_g1_i1	1442.53	319.695	-2.17383	0.00250456	0.268925	No	hypothetical protein MIMGU_mgv1a006920mg	Mimulus guttatus	NA	protein folding[GO:0006457]	unfolded protein binding[GO:0051082] ; calcium ion binding[GO:0005509]	endoplasmic reticulum[GO:0005783]	NA
TR34421|c0_g1_i3	61.5587	13.6455	-2.17354	0.00625807	0.447689	No	PREDICTED: NAD-dependent protein deacetylase SRT2	Erythranthe guttatus	NA	NA	NA	NA	NA
TR35025|c0_g3_i1	61.5587	13.6455	-2.17354	0.00625807	0.448253	No	hypothetical protein MIMGU_mgv1a010790mg	Mimulus guttatus	NA	NA	NA	NA	NA
TR33670|c0_g2_i1	307.794	68.2276	-2.17354	0.00306434	0.30698	No	PREDICTED: peptidyl-prolyl cis-trans isomerase FKBP62	Sesamum indicum	NA	NA	NA	NA	NA
TR34994|c1_g5_i3	492.47	109.164	-2.17354	0.00220742	0.255364	No	NA	NA	NA	NA	NA	NA	NA
TR36213|c0_g4_i2	219.559	48.734	-2.17161	0.00427386	0.361788	No	hypothetical protein MIMGU_mgv1a010951mg	Mimulus guttatus	NA	NA	NA	membrane[GO:0016020]	NA
TR26416|c1_g1_i1	2006.81	446.403	-2.16849	0.00358445	0.333771	No	NA	NA	NA	NA	NA	NA	NA
TR34270|c2_g3_i1	892.601	198.835	-2.16645	0.00202976	0.240694	No	PREDICTED: uncharacterized protein LOC105177790	Sesamum indicum	NA	NA	NA	NA	NA
TR30689|c0_g2_i2	367.3	81.8731	-2.1655	0.00277648	0.28622	No	PREDICTED: zinc finger A20 and AN1 domain-containing stress-associated protein 5-like	Sesamum indicum	NA	NA	NA	NA	NA
TR32694|c2_g1_i1	986.991	220.278	-2.16371	0.00210801	0.245363	No	hypothetical protein MIMGU_mgv1a013112mg	Mimulus guttatus	NA	photosynthesis[GO:0015979]	NA	integral component of membrane[GO:0016021] ; photosystem I reaction center[GO:0009538]	NA
TR33904|c0_g3_i3	69.7665	15.5949	-2.16146	0.00720412	0.47972	No	NA	NA	NA	NA	NA	NA	NA
TR7933|c0_g2_i1	69.7665	15.5949	-2.16146	0.00720412	0.480283	No	NA	NA	NA	NA	NA	NA	NA
TR39050|c0_g1_i2	732.549	163.746	-2.16146	0.00204933	0.241502	No	PREDICTED: uncharacterized protein LOC105176091	Sesamum indicum	NA	NA	NA	NA	NA
TR26297|c0_g1_i1	2150.45	481.492	-2.15906	0.00405023	0.353391	No	hypothetical protein MIMGU_mgv1a017579mg	Mimulus guttatus	NA	NA	NA	NA	NA
TR2768|c1_g2_i2	790.003	177.392	-2.15492	0.00210671	0.245715	No	AF479058_170 kDa heat shock protein	Sandersonia aurantiaca	NA	NA	ATP binding[GO:0005524]	NA	NA
TR38396|c1_g2_i5	1473.3	331.391	-2.15245	0.00279472	0.287058	No	PREDICTED: uncharacterized protein LOC105158308	Sesamum indicum	NA	NA	NA	NA	NA
TR33014|c0_g1_i1	3145.65	707.617	-2.15232	0.00684991	0.469339	No	PREDICTED: glyceraldehyde-3-phosphate dehydrogenase B, chloroplastic	Sesamum indicum	NA	NA	NA	NA	NA
TR25272|c0_g3_i1	77.9744	17.5442	-2.152	0.00770418	0.494469	No	NA	NA	NA	NA	NA	NA	NA
TR42225|c1_g2_i2	121.065	27.291	-2.14929	0.00726558	0.482117	No	PREDICTED: cellulose synthase-like protein G3	Sesamum indicum	NA	NA	NA	NA	NA
TR18417|c0_g1_i1	242.131	54.582	-2.14929	0.00421036	0.35855	No	hypothetical protein MIMGU_mgv1a003614mg	Mimulus guttatus	NA	protein folding[GO:0006457]	NA	NA	NA
TR30741|c0_g8_i3	1227.07	276.809	-2.14826	0.00249541	0.268451	No	PREDICTED: chlorophyll a-b binding protein 5, chloroplastic	Sesamum indicum	NA	NA	NA	NA	NA
TR2966|c6_g4_i8	164.157	37.0378	-2.148	0.00591849	0.436026	No	NA	NA	NA	NA	NA	NA	NA
TR43406|c1_g1_i3	1208.6	272.91	-2.14684	0.0024884	0.26974	No	PREDICTED: AMP deaminase-like isoform X1	Sesamum indicum	NA	NA	NA	NA	NA
TR2826|c0_g1_i2	3174.38	717.364	-2.1457	0.00710709	0.47774	No	PREDICTED: 29 kDa ribonucleoprotein A, chloroplastic	Sesamum indicum	NA	NA	NA	NA	NA
TR30798|c0_g7_i1	551.976	124.759	-2.14546	0.00234919	0.262154	No	NA	NA	NA	NA	NA	NA	NA
TR32506|c0_g3_i1	86.1822	19.4936	-2.14439	0.00794492	0.501421	No	NA	NA	NA	NA	NA	NA	NA
TR34019|c0_g2_i1	129.273	29.2404	-2.14439	0.00711111	0.477445	No	NA	NA	NA	NA	NA	NA	NA
TR32032|c1_g2_i4	43.0911	9.74679	-2.14439	0.00318994	0.314024	No	NA	NA	NA	NA	NA	NA	NA
TR19108|c0_g1_i1	266.754	60.4301	-2.14217	0.00393303	0.348518	No	methionine synthase	Plantago major	NA	methionine biosynthetic process[GO:0009086] ; methylation[GO:0032259]	zinc ion binding[GO:0008270] ; 5-methyltetrahydropteroyltriglutamate-homocysteine S-methyltransferase activity[GO:0003871]	NA	map00450:Selenocompound metabolism(S-methyltransferase[ec:2.1.1.14]) ; map00270:Cysteine and methionine metabolism(S-methyltransferase[ec:2.1.1.14])
TR30071|c2_g1_i2	798.211	181.29	-2.13847	0.0022654	0.259954	No	hypothetical protein MIMGU_mgv1a016201mg	Mimulus guttatus	NA	NA	protein binding[GO:0005515]	NA	NA
TR34869|c0_g3_i3	15231.7	3460.11	-2.13818	0.0758322	0.986566	No	chloroplast ribulose-1,5-bisphosphate carboxylase/oxygenase activase	Solenostemon scutellarioides	NA	NA	ATP binding[GO:0005524]	NA	NA
TR38392|c0_g7_i1	94.39	21.4429	-2.13813	0.00806836	0.50417	No	hypothetical protein B456_002G028900	Gossypium raimondii	NA	NA	NA	NA	NA
TR41962|c1_g4_i3	94.39	21.4429	-2.13813	0.00806836	0.503616	No	PREDICTED: 1,4-alpha-glucan-branching enzyme-like	Erythranthe guttatus	NA	NA	NA	NA	NA
TR33227|c1_g1_i5	925.432	210.531	-2.1361	0.00233812	0.263508	No	PREDICTED: uncharacterized protein LOC105169796	Sesamum indicum	NA	NA	NA	NA	NA
TR36101|c0_g1_i8	634.055	144.253	-2.13601	0.00233949	0.263139	No	PREDICTED: uncharacterized protein LOC105158378	Sesamum indicum	NA	NA	NA	NA	NA
TR44455|c2_g5_i1	196.988	44.8353	-2.1354	0.0053764	0.413801	No	NA	NA	NA	NA	NA	NA	NA
TR23511|c0_g2_i1	393.976	89.6705	-2.1354	0.00298392	0.301583	No	PREDICTED: uncharacterized protein LOC105178584	Sesamum indicum	NA	NA	NA	NA	NA
TR34803|c1_g2_i3	153.897	35.0885	-2.13289	0.00654292	0.45769	No	hypothetical protein MIMGU_mgv1a015819mg	Mimulus guttatus	NA	NA	NA	NA	NA
TR44131|c4_g12_i1	51.2989	11.6962	-2.13289	0.00534944	0.413406	No	PREDICTED: heat shock 70 kDa protein 14-like	Sesamum indicum	NA	NA	NA	NA	NA
TR35139|c0_g4_i1	521.197	118.911	-2.13195	0.00255341	0.271604	No	PREDICTED: haloacid dehalogenase-like hydrolase domain-containing protein At3g48420 isoform X2	Populus euphratica	NA	NA	NA	NA	NA
TR31443|c3_g5_i1	59.5067	13.6455	-2.12463	0.00713028	0.478167	No	NA	NA	NA	NA	NA	NA	NA
TR32470|c0_g1_i1	1309.15	300.201	-2.12463	0.00288151	0.294375	No	diacylglycerol acyltransferase type 2	Olea europaea	NA	metabolic process[GO:0008152]	transferase activity, transferring acyl groups other than amino-acyl groups[GO:0016747]	integral component of membrane[GO:0016021]	NA
TR33439|c0_g5_i8	670.99	153.999	-2.12337	0.00244341	0.267931	No	unknown	Lotus japonicus	NA	photosynthesis, light harvesting[GO:0009765] ; protein-chromophore linkage[GO:0018298]	chlorophyll binding[GO:0016168]	photosystem II[GO:0009523] ; integral component of membrane[GO:0016021] ; chloroplast[GO:0009507]	NA
TR36380|c0_g1_i1	67.7146	15.5949	-2.11839	0.00818349	0.505801	No	PREDICTED: probable 2-carboxy-D-arabinitol-1-phosphatase	Sesamum indicum	NA	NA	NA	NA	NA
TR39005|c0_g4_i2	135.429	31.1897	-2.11839	0.0075223	0.490556	No	PREDICTED: uncharacterized protein LOC105156918	Sesamum indicum	NA	NA	NA	NA	NA
TR34217|c0_g2_i3	287.274	66.2782	-2.11582	0.00406142	0.353281	No	NA	NA	NA	NA	NA	NA	NA
TR41247|c0_g5_i6	227.767	52.6327	-2.11353	0.00509198	0.40115	No	PREDICTED: RNA pseudouridine synthase 6, chloroplastic	Sesamum indicum	NA	NA	NA	NA	NA
TR39347|c0_g3_i3	539.665	124.759	-2.11292	0.00272296	0.283273	No	PREDICTED: phospholipase A1-Igamma3, chloroplastic-like	Erythranthe guttatus	NA	NA	NA	NA	NA
TR30703|c0_g4_i3	867.978	200.784	-2.11201	0.00256523	0.271336	No	PREDICTED: ATP synthase delta chain, chloroplastic-like	Sesamum indicum	NA	NA	NA	NA	NA
TR37602|c0_g2_i1	160.053	37.0378	-2.11148	0.00683423	0.46883	No	NA	NA	NA	NA	NA	NA	NA
TR34205|c0_g2_i1	84.1302	19.4936	-2.10962	0.00889832	0.521603	No	PREDICTED: peptidyl-prolyl cis-trans isomerase CYP20-2, chloroplastic	Sesamum indicum	NA	NA	NA	NA	NA
TR17685|c0_g1_i1	92.3381	21.4429	-2.10642	0.00895984	0.524128	No	PREDICTED: NADH dehydrogenase [ubiquinone] iron-sulfur protein 7, mitochondrial	Sesamum indicum	NA	NA	NA	NA	NA
TR29041|c0_g2_i4	385.768	89.6705	-2.10503	0.0034214	0.327721	No	PREDICTED: 30S ribosomal protein S13, chloroplastic	Sesamum indicum	NA	NA	NA	NA	NA
TR38803|c0_g4_i3	209.3	48.734	-2.10257	0.00572713	0.4303	No	cytochrome P450 76A35-like protein	Salvia pomifera	Lamiaceae	NA	NA	NA	NA
TR30451|c0_g1_i1	108.754	25.3417	-2.10148	0.00888729	0.521495	No	PREDICTED: 14 kDa proline-rich protein DC2.15-like	Populus euphratica	NA	NA	NA	NA	NA
TR37701|c0_g1_i6	1530.76	356.733	-2.10133	0.00358774	0.332986	No	PREDICTED: putative formamidase C869.04 isoform X1	Sesamum indicum	NA	NA	NA	NA	NA
TR32865|c1_g1_i1	116.962	27.291	-2.09954	0.00869518	0.51989	No	NA	NA	NA	NA	NA	NA	NA
TR29687|c0_g4_i3	125.169	29.2404	-2.09785	0.00844629	0.515314	No	PREDICTED: uncharacterized protein LOC105168722	Sesamum indicum	NA	NA	NA	NA	NA
TR31753|c0_g1_i1	2302.3	538.023	-2.09733	0.00562437	0.424263	No	PREDICTED: PGR5-like protein 1A, chloroplastic	Sesamum indicum	NA	NA	NA	NA	NA
TR36299|c0_g10_i1	133.377	31.1897	-2.09637	0.00817023	0.505531	No	unnamed protein product	Coffea canephora	NA	small GTPase mediated signal transduction[GO:0007264]	GTP binding[GO:0005525]	intracellular[GO:0005622]	NA
TR33180|c1_g1_i4	748.964	175.442	-2.0939	0.00274769	0.284284	No	NA	NA	NA	NA	NA	NA	NA
TR34361|c0_g2_i1	190.832	44.8353	-2.0896	0.00648185	0.454538	No	hypothetical protein MIMGU_mgv1a013659mg	Mimulus guttatus	NA	NA	NA	NA	NA
TR41577|c0_g2_i2	199.04	46.7846	-2.08895	0.00627708	0.448484	No	hypothetical protein MIMGU_mgv1a001844mg	Mimulus guttatus	NA	proteolysis[GO:0006508]	metalloendopeptidase activity[GO:0004222] ; ATP binding[GO:0005524]	NA	NA
TR36187|c0_g3_i6	398.08	93.5692	-2.08895	0.0035736	0.333855	No	PREDICTED: 20 kDa chaperonin, chloroplastic-like	Sesamum indicum	NA	NA	NA	NA	NA
TR35172|c1_g2_i2	215.455	50.6833	-2.08781	0.00588026	0.434902	No	hypothetical protein MIMGU_mgv1a019226mg	Mimulus guttatus	NA	NA	NA	NA	NA
TR2311|c0_g1_i1	240.079	56.5314	-2.08638	0.00534584	0.413691	No	hypothetical protein MIMGU_mgv1a015664mg	Mimulus guttatus	NA	NA	NA	NA	NA
TR35411|c0_g1_i4	272.91	64.3288	-2.08489	0.00477574	0.385871	No	hypothetical protein MIMGU_mgv1a020989mg	Mimulus guttatus	NA	NA	transferase activity[GO:0016740]	NA	NA
TR32102|c0_g3_i1	82.0783	19.4936	-2.074	0.00998025	0.546135	No	PREDICTED: uncharacterized protein LOC105170557 isoform X1	Sesamum indicum	NA	NA	NA	NA	NA
TR35063|c1_g5_i8	82.0783	19.4936	-2.074	0.00998025	0.545609	No	hypothetical protein MIMGU_mgv1a014159mg	Mimulus guttatus	NA	NA	NA	integral component of membrane[GO:0016021]	NA
TR38589|c0_g2_i1	90.2861	21.4429	-2.074	0.00996471	0.545811	No	PREDICTED: ammonium transporter 1 member 3	Sesamum indicum	NA	NA	NA	NA	NA
TR2945|c0_g1_i1	73.8704	17.5442	-2.074	0.00982963	0.543654	No	NA	NA	NA	NA	NA	NA	NA
TR38481|c0_g2_i3	73.8704	17.5442	-2.074	0.00982963	0.544184	No	hypothetical protein MIMGU_mgv1a003614mg	Mimulus guttatus	NA	protein folding[GO:0006457]	NA	NA	NA
TR39411|c0_g2_i1	73.8704	17.5442	-2.074	0.00982963	0.544715	No	PREDICTED: serine/threonine-protein kinase D6PK	Sesamum indicum	NA	NA	NA	NA	NA
TR36709|c0_g1_i1	106.702	25.3417	-2.074	0.00976831	0.542906	No	PREDICTED: plastidal glycolate/glycerate translocator 1, chloroplastic	Eucalyptus grandis	NA	NA	NA	integral component of membrane[GO:0016021]	NA
TR39454|c0_g3_i1	114.91	27.291	-2.074	0.00951914	0.536406	No	hypothetical protein B456_009G246900	Gossypium raimondii	NA	cellular oxidant detoxification[GO:0098869] ; oxidation-reduction process[GO:0055114] ; response to oxidative stress[GO:0006979]	heme binding[GO:0020037] ; peroxidase activity[GO:0004601]	NA	map00940:Phenylpropanoid biosynthesis(lactoperoxidase[ec:1.11.1.7])
TR35862|c0_g3_i4	131.325	31.1897	-2.074	0.00887785	0.522019	No	PREDICTED: dnaJ homolog subfamily B member 7 isoform X1	Sesamum indicum	NA	NA	NA	NA	NA
TR41327|c0_g1_i3	57.4548	13.6455	-2.074	0.00813241	0.504289	No	NA	NA	NA	NA	NA	NA	NA
TR41403|c2_g5_i1	57.4548	13.6455	-2.074	0.00813241	0.504841	No	NA	NA	NA	NA	NA	NA	NA
TR36232|c0_g8_i3	164.157	38.9872	-2.074	0.00762075	0.493576	No	NA	NA	NA	NA	NA	NA	NA
TR32240|c0_g7_i1	196.988	46.7846	-2.074	0.00667156	0.4627	No	PREDICTED: leucine-rich repeat extensin-like protein 6	Erythranthe guttatus	NA	NA	NA	NA	NA
TR7839|c0_g2_i4	49.247	11.6962	-2.074	0.00610686	0.44188	No	hypothetical protein GLYMA_05G043800	Glycine max	NA	NA	NA	NA	NA
TR40443|c0_g1_i5	229.819	54.582	-2.074	0.0058231	0.432929	No	PREDICTED: probable serine/threonine-protein kinase At1g01540	Sesamum indicum	NA	NA	NA	NA	NA
TR2950|c0_g1_i3	377.56	89.6705	-2.074	0.00392843	0.3492	No	PREDICTED: uncharacterized protein LOC105171306	Sesamum indicum	NA	NA	NA	NA	NA
TR37411|c0_g2_i1	393.976	93.5692	-2.074	0.00381993	0.346607	No	hydroxypyruvate reductase	Solenostemon scutellarioides	NA	oxidation-reduction process[GO:0055114]	NAD binding[GO:0051287] ; glycerate dehydrogenase activity[GO:0008465]	NA	map00260:Glycine, serine and threonine metabolism(dehydrogenase[ec:1.1.1.29]) ; map00630:Glyoxylate and dicarboxylate metabolism(dehydrogenase[ec:1.1.1.29]) ; map01130:Biosynthesis of antibiotics(dehydrogenase[ec:1.1.1.29]) ; map00680:Methane metabolism(dehydrogenase[ec:1.1.1.29])
TR15230|c0_g1_i1	41.0391	9.74679	-2.074	0.00366569	0.336373	No	unknown	Lotus japonicus	NA	NA	GTP binding[GO:0005525]	NA	NA
TR34869|c0_g3_i1	6654.5	1582.88	-2.07178	0.0261844	0.751541	No	chloroplast ribulose-1,5-bisphosphate carboxylase/oxygenase activase	Solenostemon scutellarioides	NA	NA	ATP binding[GO:0005524]	NA	NA
TR41507|c1_g2_i4	465.794	111.113	-2.06766	0.00353771	0.332691	No	NA	NA	NA	NA	NA	NA	NA
TR27606|c1_g1_i1	408.339	97.4679	-2.06677	0.00384244	0.347539	No	PREDICTED: glutamyl-tRNA(Gln) amidotransferase subunit B, chloroplastic/mitochondrial	Sesamum indicum	NA	NA	NA	NA	NA
TR2920|c0_g1_i1	309.845	74.0756	-2.06448	0.00465378	0.379798	No	NA	NA	NA	NA	NA	NA	NA
TR26416|c1_g1_i3	2688.06	643.288	-2.06303	0.00774986	0.494052	No	PREDICTED: light-regulated protein-like	Sesamum indicum	NA	NA	NA	NA	NA
TR42225|c1_g1_i1	512.989	122.81	-2.0625	0.00343907	0.327756	No	PREDICTED: cellulose synthase-like protein G3	Sesamum indicum	NA	NA	NA	NA	NA
TR3696|c1_g1_i1	480.158	115.012	-2.06172	0.00356552	0.333649	No	sabinene synthase	Salvia pomifera	Lamiaceae	metabolic process[GO:0008152]	magnesium ion binding[GO:0000287] ; terpene synthase activity[GO:0010333]	NA	NA
TR37063|c3_g3_i1	186.728	44.8353	-2.05823	0.00734919	0.484271	No	PREDICTED: glycine--tRNA ligase 1, mitochondrial-like	Nicotiana sylvestris	NA	NA	NA	NA	NA
TR41258|c0_g4_i2	186.728	44.8353	-2.05823	0.00734919	0.484833	No	PREDICTED: serine/threonine-protein kinase At5g01020	Sesamum indicum	NA	NA	NA	NA	NA
TR33848|c0_g3_i1	178.52	42.8859	-2.05751	0.00760852	0.49391	No	PREDICTED: GDSL esterase/lipase At5g33370-like	Sesamum indicum	NA	NA	NA	NA	NA
TR41683|c2_g2_i4	178.52	42.8859	-2.05751	0.00760852	0.493346	No	4-coumarate:coenzyme A ligase 2	Salvia miltiorrhiza	NA	metabolic process[GO:0008152]	ligase activity[GO:0016874]	NA	NA
TR36283|c0_g8_i1	153.897	37.0378	-2.05489	0.00850648	0.515663	No	hypothetical protein EUGRSUZ_I02449	Eucalyptus grandis	NA	NA	NA	NA	NA
TR43123|c1_g5_i2	283.17	68.2276	-2.05324	0.00520914	0.405321	No	unnamed protein product	Coffea canephora	NA	protein folding[GO:0006457]	NA	NA	NA
TR39650|c1_g2_i2	266.754	64.3288	-2.05197	0.00550804	0.418825	No	PREDICTED: probable galactinol--sucrose galactosyltransferase 2	Eucalyptus grandis	NA	metabolic process[GO:0008152]	catalytic activity[GO:0003824]	NA	NA
TR31934|c0_g3_i1	129.273	31.1897	-2.05128	0.00965097	0.540616	No	hypothetical protein B456_012G087400	Gossypium raimondii	NA	translation[GO:0006412]	structural constituent of ribosome[GO:0003735]	ribosome[GO:0005840]	NA
TR36101|c0_g1_i6	2493.13	602.352	-2.04928	0.00744507	0.487197	No	PREDICTED: uncharacterized protein LOC105158378	Sesamum indicum	NA	NA	NA	NA	NA
TR33639|c1_g1_i4	814.627	196.885	-2.04878	0.00334533	0.32316	No	hypothetical protein OsJ_01227	Oryza sativa Japonica Group	NA	NA	calcium ion binding[GO:0005509]	NA	NA
TR34503|c1_g4_i2	112.858	27.291	-2.04801	0.0104263	0.559229	No	NA	NA	NA	NA	NA	NA	NA
TR40656|c0_g4_i3	217.507	52.6327	-2.04703	0.00673808	0.465042	No	PREDICTED: uncharacterized protein LOC101258883	Solanum lycopersicum	NA	NA	NA	integral component of membrane[GO:0016021]	NA
TR26775|c0_g1_i4	217.507	52.6327	-2.04703	0.00673808	0.464478	No	PREDICTED: uncharacterized protein LOC101256982	Solanum lycopersicum	NA	NA	NA	NA	NA
TR7862|c0_g4_i4	104.65	25.3417	-2.04599	0.0107424	0.566556	No	unnamed protein product	Coffea canephora	NA	proteolysis[GO:0006508]	aspartic-type endopeptidase activity[GO:0004190]	NA	NA
TR35587|c1_g1_i1	884.393	214.429	-2.04418	0.00344976	0.326583	No	PREDICTED: LOW QUALITY PROTEIN: phenylalanine ammonia-lyase-like	Sesamum indicum	NA	NA	NA	NA	NA
TR33460|c0_g1_i1	972.627	235.872	-2.04388	0.00353381	0.332875	No	PREDICTED: peptidyl-prolyl cis-trans isomerase 1	Sesamum indicum	NA	NA	NA	NA	NA
TR39050|c0_g1_i5	578.652	140.354	-2.04363	0.00355079	0.332819	No	NA	NA	NA	NA	NA	NA	NA
TR7663|c0_g1_i1	184.676	44.8353	-2.04229	0.00782762	0.496779	No	NA	NA	NA	NA	NA	NA	NA
TR4095|c0_g1_i8	457.586	111.113	-2.04201	0.00396619	0.347659	No	PREDICTED: transcription factor MYC2	Sesamum indicum	NA	NA	NA	NA	NA
TR32311|c1_g2_i6	88.2341	21.4429	-2.04083	0.0110986	0.57677	No	7-deoxyloganetic acid UDP-glucosyltransferase-like protein	Lonicera japonica	NA	metabolic process[GO:0008152]	transferase activity, transferring hexosyl groups[GO:0016758]	NA	NA
TR27951|c0_g1_i1	176.468	42.8859	-2.04083	0.00811865	0.504538	No	NA	NA	NA	NA	NA	NA	NA
TR23182|c0_g2_i3	496.574	120.86	-2.03867	0.00385285	0.347374	No	PREDICTED: putative phosphatidylglycerol/phosphatidylinositol transfer protein DDB_G0282179	Sesamum indicum	NA	NA	NA	NA	NA
TR29515|c0_g1_i3	80.0263	19.4936	-2.03747	0.0112094	0.577771	No	NA	NA	NA	NA	NA	NA	NA
TR42012|c0_g3_i1	80.0263	19.4936	-2.03747	0.0112094	0.577248	No	PREDICTED: formate--tetrahydrofolate ligase-like	Camelina sativa	NA	NA	NA	NA	NA
TR44572|c2_g4_i3	80.0263	19.4936	-2.03747	0.0112094	0.578296	No	hypothetical protein MIMGU_mgv1a001054mg	Mimulus guttatus	NA	carbohydrate metabolic process[GO:0005975]	carbohydrate binding[GO:0030246] ; hydrolase activity, hydrolyzing O-glycosyl compounds[GO:0004553]	NA	NA
TR30086|c0_g3_i4	160.053	38.9872	-2.03747	0.00877395	0.519135	No	PREDICTED: dof zinc finger protein DOF1.4-like	Nicotiana sylvestris	NA	NA	NA	NA	NA
TR42231|c0_g7_i1	160.053	38.9872	-2.03747	0.00877395	0.519676	No	FtsZ-like protein	Nicotiana tabacum	NA	microtubule-based process[GO:0007017] ; metabolic process[GO:0008152] ; cell division[GO:0051301]	GTP binding[GO:0005525] ; GTPase activity[GO:0003924]	cytoplasm[GO:0005737] ; microtubule[GO:0005874]	NA
TR2435|c0_g2_i2	878.237	214.429	-2.03411	0.00359714	0.333313	No	PREDICTED: ferredoxin-2, chloroplastic	Camelina sativa	NA	NA	NA	NA	NA
TR40196|c0_g3_i2	71.8185	17.5442	-2.03336	0.0111251	0.576565	No	PREDICTED: serine/threonine-protein kinase CDL1	Sesamum indicum	NA	NA	NA	NA	NA
TR40469|c0_g3_i1	71.8185	17.5442	-2.03336	0.0111251	0.57604	No	hypothetical protein MIMGU_mgv1a0098262mg, partial	Mimulus guttatus	NA	proteolysis[GO:0006508]	aspartic-type endopeptidase activity[GO:0004190]	NA	NA
TR36273|c0_g6_i10	71.8185	17.5442	-2.03336	0.0111251	0.577092	No	PREDICTED: ankyrin repeat and SAM domain-containing protein 4B-like	Sesamum indicum	NA	NA	NA	NA	NA
TR28695|c0_g2_i1	1132.68	276.809	-2.03278	0.00392915	0.348719	No	NA	NA	NA	NA	NA	NA	NA
TR41834|c0_g2_i2	135.429	33.1391	-2.03093	0.010026	0.547055	No	PREDICTED: acetylornithine aminotransferase, chloroplastic/mitochondrial-like	Sesamum indicum	NA	NA	NA	NA	NA
TR44215|c1_g8_i4	135.429	33.1391	-2.03093	0.010026	0.547581	No	PREDICTED: probable galactinol--sucrose galactosyltransferase 2	Sesamum indicum	NA	NA	NA	NA	NA
TR37552|c0_g1_i1	63.6107	15.5949	-2.0282	0.0105985	0.564732	No	PREDICTED: CRS2-associated factor 2, chloroplastic	Sesamum indicum	NA	NA	NA	NA	NA
TR41253|c0_g1_i7	63.6107	15.5949	-2.0282	0.0105985	0.565793	No	PREDICTED: protein NRT1/ PTR FAMILY 5.10-like	Sesamum indicum	NA	NA	NA	NA	NA
TR43724|c0_g6_i2	63.6107	15.5949	-2.0282	0.0105985	0.565262	No	PREDICTED: 2-oxoglutarate dehydrogenase, mitochondrial-like	Citrus sinensis	NA	NA	NA	NA	NA
TR28172|c0_g1_i3	3051.26	748.554	-2.02723	0.0103431	0.557928	No	PREDICTED: photosystem II 5 kDa protein, chloroplastic	Sesamum indicum	NA	NA	NA	NA	NA
TR2181|c0_g2_i1	119.013	29.2404	-2.02509	0.010971	0.574347	No	PREDICTED: glycerophosphodiester phosphodiesterase GDPDL3-like	Sesamum indicum	NA	NA	NA	NA	NA
TR36489|c0_g1_i4	476.054	116.962	-2.02509	0.00415899	0.35524	No	cytochrome P450 CYP81Q43	Salvia miltiorrhiza	NA	oxidation-reduction process[GO:0055114]	heme binding[GO:0020037] ; oxidoreductase activity, acting on paired donors, with incorporation or reduction of molecular oxygen[GO:0016705] ; monooxygenase activity[GO:0004497] ; iron ion binding[GO:0005506]	NA	NA
TR42331|c0_g1_i1	689.457	169.594	-2.02337	0.0037326	0.340313	No	PREDICTED: uncharacterized protein LOC105167066	Sesamum indicum	NA	NA	NA	NA	NA
TR44813|c4_g5_i2	110.806	27.291	-2.02153	0.0114255	0.58257	No	hypothetical protein MIMGU_mgv1a0176472mg, partial	Mimulus guttatus	NA	NA	NA	NA	NA
TR34360|c0_g1_i6	55.4028	13.6455	-2.02153	0.00928619	0.535498	No	hypothetical protein MIMGU_mgv1a012348mg	Mimulus guttatus	NA	metabolic process[GO:0008152]	catalytic activity[GO:0003824]	NA	NA
TR40563|c2_g6_i4	593.015	146.202	-2.02011	0.00389015	0.348524	No	12-oxophytodienoate reductase	Isodon eriocalyx	Lamiaceae	oxidation-reduction process[GO:0055114]	oxidoreductase activity[GO:0016491] ; FMN binding[GO:0010181]	NA	NA
TR39594|c0_g1_i1	482.21	118.911	-2.01978	0.00422205	0.359007	No	PREDICTED: probable aminotransferase ACS10	Sesamum indicum	NA	NA	NA	NA	NA
TR36913|c1_g3_i4	158.001	38.9872	-2.01886	0.00942004	0.534	No	NA	NA	NA	NA	NA	NA	NA
TR3746|c2_g1_i2	102.598	25.3417	-2.01742	0.0118202	0.593109	No	PREDICTED: uncharacterized protein LOC100500629 isoform X2	Glycine max	NA	NA	NA	NA	NA
TR2217|c0_g1_i4	102.598	25.3417	-2.01742	0.0118202	0.592063	No	PREDICTED: glycine-rich protein 2-like isoform X1	Sesamum indicum	NA	NA	NA	NA	NA
TR38699|c2_g1_i2	102.598	25.3417	-2.01742	0.0118202	0.592585	No	PREDICTED: uncharacterized protein LOC105167163 isoform X1	Sesamum indicum	NA	NA	NA	NA	NA
TR40796|c0_g5_i5	252.391	62.3795	-2.01652	0.00658398	0.458867	No	NA	NA	NA	NA	NA	NA	NA
TR32213|c0_g8_i4	149.793	37.0378	-2.0159	0.00986285	0.543903	No	NA	NA	NA	NA	NA	NA	NA
TR43738|c0_g6_i1	299.586	74.0756	-2.0159	0.00573621	0.430412	No	hypothetical protein JCGZ_14114	Jatropha curcas	NA	protein import[GO:0017038] ; protein targeting[GO:0006605]	ATP binding[GO:0005524]	intracellular[GO:0005622] ; membrane[GO:0016020]	NA
TR44018|c3_g1_i1	196.988	48.734	-2.01511	0.0081851	0.50535	No	PREDICTED: probable disease resistance RPP8-like protein 2	Sesamum indicum	NA	NA	NA	NA	NA
TR42757|c2_g7_i1	47.195	11.6962	-2.0126	0.00700353	0.474145	No	PREDICTED: protein TRANSPARENT TESTA 12-like	Erythranthe guttatus	NA	NA	NA	NA	NA
TR36049|c3_g4_i2	180.572	44.8353	-2.00987	0.00888488	0.521893	No	PREDICTED: uncharacterized protein LOC105156041	Sesamum indicum	NA	NA	NA	NA	NA
TR42225|c1_g1_i2	361.144	89.6705	-2.00987	0.0052006	0.405211	No	PREDICTED: cellulose synthase-like protein G3	Sesamum indicum	NA	NA	NA	NA	NA
TR38253|c0_g1_i2	305.742	76.025	-2.00777	0.00582988	0.432867	No	PREDICTED: probable LRR receptor-like serine/threonine-protein kinase At1g56140	Nicotiana tomentosiformis	NA	NA	NA	NA	NA
TR38385|c0_g6_i2	86.1822	21.4429	-2.00689	0.0123793	0.603052	No	PREDICTED: NADH--cytochrome b5 reductase 1-like	Sesamum indicum	NA	NA	NA	NA	NA
TR39957|c2_g1_i6	86.1822	21.4429	-2.00689	0.0123793	0.602535	No	PREDICTED: uncharacterized protein LOC105164663 isoform X1	Sesamum indicum	NA	NA	NA	NA	NA
TR6913|c0_g1_i1	86.1822	21.4429	-2.00689	0.0123793	0.601504	No	PREDICTED: 26S proteasome non-ATPase regulatory subunit 6 homolog	Sesamum indicum	NA	NA	NA	NA	NA
TR8181|c5_g3_i2	86.1822	21.4429	-2.00689	0.0123793	0.602019	No	NA	NA	NA	NA	NA	NA	NA
TR37072|c0_g1_i4	77.9744	19.4936	-2	0.0126073	0.604821	No	NA	NA	NA	NA	NA	NA	NA
TR32998|c1_g2_i1	194.936	48.734	-2	0.00869235	0.520817	No	PREDICTED: imidazoleglycerol-phosphate dehydratase-like	Sesamum indicum	NA	NA	NA	NA	NA
TR42502|c1_g3_i4	545.82	136.455	-2	0.00433814	0.365053	No	hypothetical protein MIMGU_mgv1a000979mg	Mimulus guttatus	NA	oxylipin biosynthetic process[GO:0031408] ; oxidation-reduction process[GO:0055114]	metal ion binding[GO:0046872] ; oxidoreductase activity, acting on single donors with incorporation of molecular oxygen, incorporation of two atoms of oxygen[GO:0016702]	NA	NA
TR35491|c0_g1_i1	38.9872	9.74679	-2	0.00425052	0.360349	No	NA	NA	NA	NA	NA	NA	NA
TR38083|c0_g5_i2	1270.16	317.745	-1.99907	0.00481472	0.387916	No	PREDICTED: protochlorophyllide reductase	Sesamum indicum	NA	NA	NA	NA	NA
TR26444|c0_g1_i1	755.12	189.088	-1.99765	0.00414243	0.355967	No	hypothetical protein MIMGU_mgv1a015733mg	Mimulus guttatus	NA	metabolic process[GO:0008152]	ATP binding[GO:0005524] ; ligase activity[GO:0016874]	NA	NA
TR37926|c0_g2_i6	334.469	83.8224	-1.99646	0.00574699	0.430653	No	PREDICTED: uncharacterized calcium-binding protein At1g02270	Sesamum indicum	NA	NA	NA	NA	NA
TR40516|c0_g1_i5	1087.54	272.91	-1.99457	0.00453441	0.374904	No	NA	NA	NA	NA	NA	NA	NA
TR33439|c0_g5_i5	465.794	116.962	-1.99366	0.00477499	0.386359	No	chlorophyll a/b binding protein	Medicago sativa	NA	photosynthesis, light harvesting[GO:0009765] ; protein-chromophore linkage[GO:0018298]	metal ion binding[GO:0046872] ; chlorophyll binding[GO:0016168]	photosystem II[GO:0009523] ; integral component of membrane[GO:0016021] ; chloroplast[GO:0009507] ; photosystem I[GO:0009522]	NA
TR40973|c1_g1_i1	318.053	79.9237	-1.99257	0.00601739	0.439323	No	hypothetical protein MIMGU_mgv1a002252mg	Mimulus guttatus	NA	transmembrane transport[GO:0055085]	NA	integral component of membrane[GO:0016021]	NA
TR42780|c0_g3_i1	209.3	52.6327	-1.99154	0.00845636	0.515375	No	PREDICTED: pyruvate dehydrogenase E1 component subunit alpha-3, chloroplastic-like	Vigna radiata var. radiata	NA	NA	NA	NA	NA
TR42436|c0_g9_i1	309.845	77.9744	-1.99048	0.00616726	0.443988	No	PREDICTED: LOW QUALITY PROTEIN: calreticulin-like, partial	Malus domestica	NA	NA	NA	NA	NA
TR28750|c1_g1_i4	1214.76	306.049	-1.98883	0.0048987	0.391903	No	Oxygen-evolving enhancer protein 3-1	Populus trichocarpa	NA	photosynthesis[GO:0015979]	calcium ion binding[GO:0005509]	photosystem II oxygen evolving complex[GO:0009654] ; extrinsic component of membrane[GO:0019898]	NA
TR30441|c0_g1_i3	603.275	152.05	-1.98827	0.00442121	0.368766	No	copper/zinc superoxide dismutase 3 family protein	Populus trichocarpa	NA	removal of superoxide radicals[GO:0019430] ; oxidation-reduction process[GO:0055114]	copper ion binding[GO:0005507] ; superoxide dismutase activity[GO:0004784] ; zinc ion binding[GO:0008270]	cytoplasm[GO:0005737] ; extracellular space[GO:0005615]	NA
TR4114|c1_g1_i2	231.871	58.4808	-1.98729	0.00787046	0.497828	No	hypothetical protein MIMGU_mgv1a012183mg	Mimulus guttatus	NA	NA	NA	NA	NA
TR41596|c0_g1_i1	262.65	66.2782	-1.98654	0.00709481	0.477479	No	NA	NA	NA	NA	NA	NA	NA
TR30882|c0_g3_i1	192.884	48.734	-1.98473	0.00923263	0.534579	No	PREDICTED: phosphoethanolamine N-methyltransferase 1-like	Sesamum indicum	NA	NA	NA	NA	NA
TR36925|c0_g4_i3	9463.62	2391.86	-1.98426	0.0535604	0.911956	No	O-methyltransferase	Mentha x piperita	NA	methylation[GO:0032259]	O-methyltransferase activity[GO:0008171] ; protein dimerization activity[GO:0046983]	NA	NA
TR36096|c0_g1_i1	92.3381	23.3923	-1.98089	0.013406	0.62212	No	PREDICTED: IAA-amino acid hydrolase ILR1-like 2	Sesamum indicum	NA	NA	NA	NA	NA
TR2956|c0_g3_i1	61.5587	15.5949	-1.98089	0.0120848	0.597933	No	PREDICTED: dnaJ homolog 1, mitochondrial-like, partial	Sesamum indicum	NA	NA	NA	NA	NA
TR34504|c0_g2_i1	61.5587	15.5949	-1.98089	0.0120848	0.597412	No	PREDICTED: two-component response regulator ARR8-like	Nelumbo nucifera	NA	NA	NA	NA	NA
TR29057|c0_g2_i3	153.897	38.9872	-1.98089	0.0108712	0.571225	No	PREDICTED: mitochondrial uncoupling protein 5-like	Nicotiana sylvestris	NA	NA	NA	NA	NA
TR35428|c2_g3_i6	430.911	109.164	-1.98089	0.00523893	0.406525	No	PREDICTED: 40S ribosomal protein S2-4-like	Sesamum indicum	NA	NA	NA	NA	NA
TR35719|c0_g1_i3	361.144	91.6199	-1.97884	0.00586367	0.434241	No	PREDICTED: type I inositol 1,4,5-trisphosphate 5-phosphatase 1-like isoform X2	Sesamum indicum	NA	NA	NA	NA	NA
TR39177|c0_g2_i2	145.689	37.0378	-1.97582	0.0114537	0.583483	No	hypothetical protein MIMGU_mgv1a004329mg	Mimulus guttatus	NA	oxidation-reduction process[GO:0055114]	flavin adenine dinucleotide binding[GO:0050660] ; oxidoreductase activity, acting on CH-OH group of donors[GO:0016614]	NA	NA
TR38673|c1_g1_i1	636.107	161.797	-1.97509	0.0046191	0.378054	No	PREDICTED: uncharacterized protein LOC105159671 isoform X1	Sesamum indicum	NA	NA	NA	NA	NA
TR14694|c0_g1_i1	84.1302	21.4429	-1.97212	0.0138275	0.630858	No	PREDICTED: pre-mRNA-processing-splicing factor 8-like	Camelina sativa	NA	NA	NA	NA	NA
TR37217|c0_g3_i2	84.1302	21.4429	-1.97212	0.0138275	0.631365	No	NA	NA	NA	NA	NA	NA	NA
TR42531|c0_g1_i3	420.651	107.215	-1.97212	0.00549733	0.419696	No	PREDICTED: alpha-1,4 glucan phosphorylase L-2 isozyme, chloroplastic/amyloplastic-like	Sesamum indicum	NA	NA	NA	NA	NA
TR8205|c1_g6_i1	137.481	35.0885	-1.97016	0.0120956	0.596907	No	hypothetical protein CISIN_1g0045481mg, partial	Citrus sinensis	NA	ion transmembrane transport[GO:0034220] ; regulation of ion transmembrane transport[GO:0034765]	voltage-gated ion channel activity[GO:0005244] ; calcium ion binding[GO:0005509]	integral component of membrane[GO:0016021]	NA
TR1003|c0_g1_i1	137.481	35.0885	-1.97016	0.0120956	0.597426	No	NA	NA	NA	NA	NA	NA	NA
TR40403|c0_g2_i2	931.588	237.822	-1.96981	0.00478048	0.385704	No	PREDICTED: glycosylphosphatidylinositol anchor attachment 1 protein	Sesamum indicum	NA	NA	NA	NA	NA
TR2655|c0_g5_i9	328.313	83.8224	-1.96966	0.0064378	0.453127	No	hypothetical protein MIMGU_mgv1a016610mg	Mimulus guttatus	NA	protein targeting[GO:0006605] ; protein transmembrane transport[GO:0071806]	P-P-bond-hydrolysis-driven protein transmembrane transporter activity[GO:0015450]	intracellular[GO:0005622] ; integral component of membrane[GO:0016021]	NA
TR3898|c1_g2_i3	2587.52	660.833	-1.96921	0.0104708	0.560027	No	PREDICTED: ribosome-binding factor PSRP1, chloroplastic	Sesamum indicum	NA	NA	NA	NA	NA
TR39963|c2_g2_i4	1007.51	257.315	-1.96919	0.00490166	0.391588	No	NA	NA	NA	NA	NA	NA	NA
TR36475|c0_g1_i2	5575.17	1424.98	-1.96807	0.027414	0.767821	No	hypothetical protein EUGRSUZ_I00886	Eucalyptus grandis	NA	NA	NA	NA	NA
TR34379|c0_g4_i7	160.053	40.9365	-1.96709	0.0110897	0.577363	No	PREDICTED: proline-rich protein 4	Sesamum indicum	NA	NA	NA	NA	NA
TR38500|c0_g6_i1	53.3509	13.6455	-1.96709	0.010618	0.564186	No	NA	NA	NA	NA	NA	NA	NA
TR44630|c0_g1_i2	53.3509	13.6455	-1.96709	0.010618	0.564715	No	PREDICTED: pleiotropic drug resistance protein 2-like	Sesamum indicum	NA	NA	NA	NA	NA
TR34165|c0_g2_i2	494.522	126.708	-1.96452	0.00521557	0.405266	No	hypothetical protein MIMGU_mgv1a011495mg	Mimulus guttatus	NA	protein phosphorylation[GO:0006468]	protein kinase activity[GO:0004672] ; ATP binding[GO:0005524]	NA	NA
TR30552|c0_g4_i1	311.897	79.9237	-1.96438	0.00677512	0.4659	No	RuBisCO subunit binding-protein beta subunit precursor	Arabidopsis thaliana	NA	NA	NA	NA	NA
TR43590|c1_g6_i3	129.273	33.1391	-1.96382	0.012793	0.608591	No	PREDICTED: zinc finger CCCH domain-containing protein 29-like isoform 1	Solanum lycopersicum	NA	NA	NA	NA	NA
TR30156|c0_g1_i3	517.093	132.556	-1.96382	0.00513211	0.401528	No	hypothetical protein MIMGU_mgv1a016615mg	Mimulus guttatus	NA	NA	NA	NA	NA
TR34662|c0_g1_i1	281.118	72.1263	-1.96258	0.00733422	0.485537	No	PREDICTED: uncharacterized protein LOC105166195	Sesamum indicum	NA	NA	NA	NA	NA
TR40759|c2_g1_i2	281.118	72.1263	-1.96258	0.00733422	0.484972	No	PREDICTED: beta-D-xylosidase 1	Sesamum indicum	NA	NA	NA	NA	NA
TR7711|c1_g4_i6	227.767	58.4808	-1.96153	0.00874905	0.519284	No	NA	NA	NA	NA	NA	NA	NA
TR27922|c0_g1_i1	478.106	122.81	-1.96091	0.00537466	0.414228	No	PREDICTED: uncharacterized protein LOC105176133	Sesamum indicum	NA	NA	NA	NA	NA
TR29041|c0_g2_i8	1023.93	263.163	-1.96008	0.00511964	0.402214	No	PREDICTED: 30S ribosomal protein S13, chloroplastic	Sesamum indicum	NA	NA	NA	NA	NA
TR29837|c0_g1_i3	98.4939	25.3417	-1.95852	0.0143355	0.639146	No	NA	NA	NA	NA	NA	NA	NA
TR32784|c0_g2_i4	98.4939	25.3417	-1.95852	0.0143355	0.639648	No	NA	NA	NA	NA	NA	NA	NA
TR35691|c0_g5_i1	98.4939	25.3417	-1.95852	0.0143355	0.640151	No	NA	NA	NA	NA	NA	NA	NA
TR36518|c2_g3_i4	98.4939	25.3417	-1.95852	0.0143355	0.640655	No	NA	NA	NA	NA	NA	NA	NA
TR30735|c0_g1_i5	393.976	101.367	-1.95852	0.00602022	0.438966	No	NA	NA	NA	NA	NA	NA	NA
TR38734|c0_g3_i2	923.381	237.822	-1.95704	0.00503221	0.397545	No	hypothetical protein MIMGU_mgv1a006915mg	Mimulus guttatus	NA	metabolic process[GO:0008152]	catalytic activity[GO:0003824]	NA	NA
TR29587|c0_g2_i1	143.637	37.0378	-1.95536	0.0123503	0.602152	No	hypothetical protein MIMGU_mgv1a012981mg	Mimulus guttatus	NA	NA	NA	NA	NA
TR38038|c0_g2_i4	166.208	42.8859	-1.95442	0.0112885	0.577656	No	PREDICTED: uncharacterized protein LOC105163785	Sesamum indicum	NA	NA	NA	NA	NA
TR31712|c0_g1_i1	166.208	42.8859	-1.95442	0.0112885	0.578177	No	hypothetical protein MIMGU_mgv1a016151mg	Mimulus guttatus	NA	NA	NA	NA	NA
TR39603|c0_g3_i10	211.352	54.582	-1.95315	0.00957989	0.53876	No	PREDICTED: ATP synthase gamma chain, chloroplastic-like	Sesamum indicum	NA	NA	NA	NA	NA
TR37634|c0_g1_i3	279.066	72.1263	-1.95201	0.0076661	0.494259	No	hypothetical protein MIMGU_mgv1a013946mg	Mimulus guttatus	NA	NA	NA	NA	NA
TR35041|c0_g4_i6	324.209	83.8224	-1.95152	0.00694718	0.472583	No	PREDICTED: probable ribose-5-phosphate isomerase 2	Sesamum indicum	NA	NA	NA	NA	NA
TR34489|c0_g1_i5	1536.92	397.669	-1.9504	0.00670491	0.464446	No	PREDICTED: protein EXORDIUM-like 5	Sesamum indicum	NA	NA	NA	NA	NA
TR42097|c1_g3_i1	90.2861	23.3923	-1.94847	0.0148683	0.653157	No	Uncharacterized protein isoform 1	Theobroma cacao	NA	protein autophosphorylation[GO:0046777] ; response to blue light[GO:0009637] ; regulation of proton transport[GO:0010155] ; cellular cation homeostasis[GO:0030003] ; divalent metal ion transport[GO:0070838]	NA	chloroplast thylakoid membrane[GO:0009535]	NA
TR40019|c0_g1_i1	112.858	29.2404	-1.94847	0.0143102	0.641036	No	PREDICTED: porphobilinogen deaminase, chloroplastic-like	Camelina sativa	NA	NA	NA	NA	NA
TR30906|c1_g2_i8	67.7146	17.5442	-1.94847	0.014308	0.641444	No	NA	NA	NA	NA	NA	NA	NA
TR28893|c1_g2_i2	45.143	11.6962	-1.94847	0.00807671	0.503032	No	PREDICTED: NADH dehydrogenase [ubiquinone] 1 beta subcomplex subunit 2	Pyrus x bretschneideri	NA	NA	NA	NA	NA
TR34654|c0_g3_i1	45.143	11.6962	-1.94847	0.00807671	0.503584	No	PREDICTED: scarecrow-like protein 27	Sesamum indicum	NA	NA	NA	NA	NA
TR28620|c0_g1_i5	270.858	70.1769	-1.94847	0.00794616	0.500943	No	NA	NA	NA	NA	NA	NA	NA
TR3283|c0_g6_i7	632.003	163.746	-1.94847	0.00516111	0.402687	No	PREDICTED: upstream activation factor subunit spp27-like	Sesamum indicum	NA	NA	NA	NA	NA
TR39963|c2_g7_i2	1300.94	337.239	-1.94771	0.00603962	0.439253	No	hypothetical protein JCGZ_03845	Jatropha curcas	NA	carbohydrate metabolic process[GO:0005975] ; phosphorylation[GO:0016310]	phosphoribulokinase activity[GO:0008974] ; ATP binding[GO:0005524]	NA	map00710:Carbon fixation in photosynthetic organisms(phosphopentokinase[ec:2.7.1.19])
TR32659|c0_g1_i5	149.793	38.9872	-1.9419	0.0125653	0.607422	No	NA	NA	NA	NA	NA	NA	NA
TR43015|c0_g1_i4	231.871	60.4301	-1.93998	0.00929494	0.535458	No	hypothetical protein MIMGU_mgv1a026830mg	Mimulus guttatus	NA	NA	kinase activity[GO:0016301]	NA	NA
TR34097|c0_g1_i1	209.3	54.582	-1.93907	0.010133	0.550778	No	PREDICTED: WAT1-related protein At5g07050	Sesamum indicum	NA	NA	NA	NA	NA
TR38699|c2_g3_i1	82.0783	21.4429	-1.9365	0.0154668	0.660054	No	PREDICTED: uncharacterized protein LOC105961476 isoform X2	Erythranthe guttatus	NA	NA	NA	NA	NA
TR39132|c1_g1_i7	82.0783	21.4429	-1.9365	0.0154668	0.661047	No	NA	NA	NA	NA	NA	NA	NA
TR43166|c2_g3_i3	82.0783	21.4429	-1.9365	0.0154668	0.66055	No	PREDICTED: uncharacterized protein LOC105169746	Sesamum indicum	NA	NA	NA	NA	NA
TR27061|c0_g1_i1	82.0783	21.4429	-1.9365	0.0154668	0.661545	No	hypothetical protein MIMGU_mgv1a014118mg	Mimulus guttatus	NA	NA	NA	integral component of membrane[GO:0016021]	NA
TR33259|c0_g1_i5	611.483	159.847	-1.93562	0.00547388	0.418468	No	PREDICTED: protein STRICTOSIDINE SYNTHASE-LIKE 5-like	Sesamum indicum	NA	NA	NA	NA	NA
TR35064|c0_g1_i7	141.585	37.0378	-1.9346	0.0133221	0.619239	No	PREDICTED: histone deacetylase 14 isoform X2	Sesamum indicum	NA	NA	NA	NA	NA
TR2698|c0_g1_i11	201.092	52.6327	-1.93382	0.0106409	0.564345	No	NA	NA	NA	NA	NA	NA	NA
TR20346|c0_g1_i1	320.105	83.8224	-1.93314	0.0074997	0.489644	No	hypothetical protein LR48_Vigan04g067800	Vigna angularis	NA	translational elongation[GO:0006414]	translation elongation factor activity[GO:0003746] ; GTP binding[GO:0005525] ; GTPase activity[GO:0003924]	intracellular[GO:0005622]	NA
TR44204|c1_g7_i1	59.5067	15.5949	-1.93198	0.013799	0.632093	No	hypothetical protein MIMGU_mgv11b020544mg	Mimulus guttatus	NA	NA	zinc ion binding[GO:0008270]	NA	NA
TR21201|c0_g1_i1	59.5067	15.5949	-1.93198	0.013799	0.631583	No	PREDICTED: probable receptor-like protein kinase At1g67000	Erythranthe guttatus	NA	NA	NA	NA	NA
TR35064|c0_g1_i8	357.04	93.5692	-1.93198	0.00706373	0.476516	No	PREDICTED: histone deacetylase 14 isoform X1	Sesamum indicum	NA	NA	NA	NA	NA
TR31602|c0_g1_i2	2593.67	680.326	-1.9307	0.0120736	0.598425	No	PREDICTED: uncharacterized protein LOC105169586	Sesamum indicum	NA	NA	NA	NA	NA
TR38762|c0_g3_i4	155.949	40.9365	-1.92961	0.0127503	0.607065	No	NA	NA	NA	NA	NA	NA	NA
TR33175|c0_g3_i2	96.442	25.3417	-1.92815	0.0158014	0.663368	No	FKBP-like peptidyl-prolyl cis-trans isomerase family protein isoform 2	Theobroma cacao	NA	protein peptidyl-prolyl isomerization[GO:0000413] ; protein folding[GO:0006457] ; cellular response to water deprivation[GO:0042631]	peptidyl-prolyl cis-trans isomerase activity[GO:0003755]	chloroplast thylakoid membrane[GO:0009535]	NA
TR37257|c1_g1_i3	96.442	25.3417	-1.92815	0.0158014	0.662878	No	PREDICTED: uncharacterized protein LOC105170590	Sesamum indicum	NA	NA	NA	NA	NA
TR38075|c0_g2_i3	96.442	25.3417	-1.92815	0.0158014	0.662389	No	NA	NA	NA	NA	NA	NA	NA
TR4003|c0_g1_i2	96.442	25.3417	-1.92815	0.0158014	0.6619	No	NA	NA	NA	NA	NA	NA	NA
TR35448|c0_g2_i1	289.326	76.025	-1.92815	0.00814745	0.504671	No	geranyl diphsophate synthase small subunit	Lavandula x intermedia	NA	NA	NA	NA	NA
TR24521|c0_g1_i2	229.819	60.4301	-1.92716	0.00979141	0.543658	No	PREDICTED: uncharacterized protein LOC105166552	Sesamum indicum	NA	NA	NA	NA	NA
TR39362|c1_g1_i2	570.444	150.101	-1.92616	0.00578202	0.432138	No	PREDICTED: probable pectate lyase 8	Sesamum indicum	NA	NA	NA	NA	NA
TR2781|c0_g1_i1	1881.64	495.137	-1.92609	0.0088061	0.520495	No	PREDICTED: protein TIC 20-v, chloroplastic	Sesamum indicum	NA	NA	NA	NA	NA
TR40443|c0_g1_i1	207.248	54.582	-1.92486	0.0107197	0.566408	No	PREDICTED: probable serine/threonine-protein kinase At1g01540	Sesamum indicum	NA	NA	NA	NA	NA
TR34503|c1_g2_i1	281.118	74.0756	-1.92411	0.00844059	0.515521	No	unnamed protein product	Coffea canephora	NA	glycolytic process[GO:0006096]	fructose-bisphosphate aldolase activity[GO:0004332]	NA	map00030:Pentose phosphate pathway(aldolase[ec:4.1.2.13]) ; map01130:Biosynthesis of antibiotics(aldolase[ec:4.1.2.13]) ; map00051:Fructose and mannose metabolism(aldolase[ec:4.1.2.13]) ; map00710:Carbon fixation in photosynthetic organisms(aldolase[ec:4.1.2.13]) ; map00010:Glycolysis / Gluconeogenesis(aldolase[ec:4.1.2.13]) ; map00680:Methane metabolism(aldolase[ec:4.1.2.13])
TR34165|c0_g2_i1	562.236	148.151	-1.92411	0.00585365	0.434064	No	PREDICTED: phosphoenolpyruvate carboxylase kinase 2	Sesamum indicum	NA	NA	NA	NA	NA
TR37362|c0_g2_i2	110.806	29.2404	-1.922	0.0156503	0.664887	No	PREDICTED: uncharacterized protein LOC105170157 isoform X1	Sesamum indicum	NA	NA	NA	NA	NA
TR40033|c1_g1_i3	110.806	29.2404	-1.922	0.0156503	0.66439	No	PREDICTED: protein NRT1/ PTR FAMILY 6.4	Sesamum indicum	NA	NA	NA	NA	NA
TR28826|c0_g1_i2	184.676	48.734	-1.922	0.0117712	0.592221	No	NA	NA	NA	NA	NA	NA	NA
TR30703|c0_g4_i4	1571.8	415.213	-1.92049	0.00769109	0.494747	No	PREDICTED: ATP synthase delta chain, chloroplastic-like	Sesamum indicum	NA	NA	NA	NA	NA
TR35838|c1_g2_i2	162.105	42.8859	-1.91835	0.0129133	0.612771	No	PREDICTED: uncharacterized protein LOC105170041	Sesamum indicum	NA	NA	NA	NA	NA
TR20144|c0_g1_i2	125.169	33.1391	-1.91728	0.0150816	0.653431	No	PREDICTED: pinin	Sesamum indicum	NA	NA	NA	NA	NA
TR34801|c1_g2_i1	125.169	33.1391	-1.91728	0.0150816	0.65393	No	PREDICTED: nuclear transcription factor Y subunit B-3-like	Sesamum indicum	NA	NA	NA	NA	NA
TR36232|c0_g7_i3	125.169	33.1391	-1.91728	0.0150816	0.652933	No	PREDICTED: uncharacterized protein LOC105173891	Sesamum indicum	NA	NA	NA	NA	NA
TR35950|c0_g11_i1	88.2341	23.3923	-1.9153	0.0165135	0.66808	No	PREDICTED: glutathione S-transferase T1-like	Sesamum indicum	NA	NA	NA	NA	NA
TR33234|c1_g2_i4	176.468	46.7846	-1.9153	0.0123933	0.601671	No	PREDICTED: auxin-induced protein PCNT115-like	Sesamum indicum	NA	NA	NA	NA	NA
TR31831|c1_g2_i1	4415.81	1171.56	-1.91424	0.0238619	0.736621	No	PREDICTED: chlorophyll a-b binding protein 6, chloroplastic-like	Malus domestica	NA	NA	NA	NA	NA
TR32904|c0_g1_i1	279.066	74.0756	-1.91354	0.00881738	0.520079	No	hypothetical protein MIMGU_mgv1a001022mg	Mimulus guttatus	NA	translational initiation[GO:0006413]	GTP binding[GO:0005525] ; translation initiation factor activity[GO:0003743] ; GTPase activity[GO:0003924]	intracellular[GO:0005622]	NA
TR2768|c1_g4_i2	558.132	148.151	-1.91354	0.00612136	0.442366	No	hypothetical protein MIMGU_mgv1a002667mg	Mimulus guttatus	NA	NA	ATP binding[GO:0005524]	NA	NA
TR32797|c2_g1_i1	1908.32	506.833	-1.91272	0.00939867	0.537077	No	PREDICTED: probable S-adenosylmethionine-dependent methyltransferase At5g37990	Sesamum indicum	NA	NA	NA	NA	NA
TR4004|c0_g1_i4	102.598	27.291	-1.9105	0.0165614	0.669541	No	NA	NA	NA	NA	NA	NA	NA
TR41074|c0_g2_i2	102.598	27.291	-1.9105	0.0165614	0.669065	No	NA	NA	NA	NA	NA	NA	NA
TR36148|c0_g3_i4	51.2989	13.6455	-1.9105	0.0121652	0.598784	No	NA	NA	NA	NA	NA	NA	NA
TR42535|c1_g2_i1	51.2989	13.6455	-1.9105	0.0121652	0.599824	No	hypothetical protein	Plantago major	NA	NA	NA	NA	NA
TR43187|c2_g5_i1	51.2989	13.6455	-1.9105	0.0121652	0.599304	No	PREDICTED: oligopeptide transporter 5-like	Sesamum indicum	NA	NA	NA	NA	NA
TR38253|c0_g1_i1	307.794	81.8731	-1.9105	0.00834866	0.511556	No	PREDICTED: probable LRR receptor-like serine/threonine-protein kinase At1g56140	Nicotiana tomentosiformis	NA	NA	NA	NA	NA
TR32322|c0_g1_i2	168.26	44.8353	-1.90799	0.0130611	0.616693	No	PREDICTED: uncharacterized protein LOC100257698	Vitis vinifera	NA	NA	NA	NA	NA
TR38821|c1_g5_i5	336.521	89.6705	-1.90799	0.00800429	0.502933	No	NA	NA	NA	NA	NA	NA	NA
TR34629|c0_g1_i6	116.962	31.1897	-1.90689	0.016075	0.66648	No	PREDICTED: acyl-[acyl-carrier-protein] desaturase, chloroplastic-like	Populus euphratica	NA	NA	NA	NA	NA
TR3925|c0_g8_i1	116.962	31.1897	-1.90689	0.016075	0.665994	No	uncharacterized protein LOC100305856	Glycine max	NA	spliceosomal complex assembly[GO:0000245] ; spliceosomal snRNP assembly[GO:0000387]	RNA binding[GO:0003723]	U4 snRNP[GO:0005687] ; prespliceosome[GO:0071010] ; precatalytic spliceosome[GO:0071011] ; U2 snRNP[GO:0005686] ; spliceosomal tri-snRNP complex[GO:0097526] ; U1 snRNP[GO:0005685] ; pICln-Sm protein complex[GO:0034715] ; U5 snRNP[GO:0005682] ; commitment complex[GO:0000243] ; catalytic step 2 spliceosome[GO:0071013] ; SMN-Sm protein complex[GO:0034719] ; U12-type spliceosomal complex[GO:0005689]	NA
TR35024|c0_g8_i3	299.586	79.9237	-1.90627	0.00862366	0.51889	No	PREDICTED: superoxide dismutase [Cu-Zn], chloroplastic	Phoenix dactylifera	NA	NA	NA	NA	NA
TR33835|c0_g3_i1	664.834	177.392	-1.90606	0.00609609	0.441663	No	NA	NA	NA	NA	NA	NA	NA
TR30168|c0_g10_i2	182.624	48.734	-1.90588	0.0125136	0.605437	No	PREDICTED: uncharacterized protein LOC105158092	Sesamum indicum	NA	NA	NA	NA	NA
TR43864|c1_g5_i1	365.248	97.4679	-1.90588	0.00769694	0.494563	No	PREDICTED: galactinol--sucrose galactosyltransferase	Sesamum indicum	NA	NA	NA	NA	NA
TR41654|c0_g5_i3	430.911	115.012	-1.9056	0.00703681	0.475831	No	NA	NA	NA	NA	NA	NA	NA
TR33014|c0_g1_i3	1832.4	489.289	-1.90497	0.00931955	0.534167	No	PREDICTED: glyceraldehyde-3-phosphate dehydrogenase B, chloroplastic-like	Populus euphratica	NA	NA	NA	NA	NA
TR40961|c0_g3_i4	839.25	224.176	-1.90447	0.00615024	0.443888	No	PREDICTED: violaxanthin de-epoxidase, chloroplastic	Sesamum indicum	NA	NA	NA	NA	NA
TR39250|c0_g2_i1	65.6626	17.5442	-1.90408	0.0162599	0.665401	No	PREDICTED: uncharacterized protein LOC105171867	Sesamum indicum	NA	NA	NA	NA	NA
TR40251|c0_g1_i1	65.6626	17.5442	-1.90408	0.0162599	0.666361	No	PREDICTED: pheophytinase, chloroplastic isoform X2	Sesamum indicum	NA	NA	NA	NA	NA
TR41462|c0_g5_i5	65.6626	17.5442	-1.90408	0.0162599	0.665881	No	PREDICTED: receptor-like protein kinase FERONIA	Sesamum indicum	NA	NA	NA	NA	NA
TR37011|c0_g6_i6	196.988	52.6327	-1.90408	0.011948	0.596887	No	PREDICTED: uncharacterized protein LOC105175002 isoform X2	Sesamum indicum	NA	NA	NA	NA	NA
TR28988|c1_g4_i1	262.65	70.1769	-1.90408	0.00954558	0.537362	No	hypothetical protein MIMGU_mgv1a015825mg	Mimulus guttatus	NA	NA	NA	integral component of membrane[GO:0016021]	NA
TR31309|c0_g1_i1	714.081	191.037	-1.90223	0.00616	0.444028	No	hypothetical protein MIMGU_mgv1a024078mg	Mimulus guttatus	NA	NA	NA	NA	NA
TR32802|c1_g2_i1	145.689	38.9872	-1.90182	0.0145454	0.64597	No	4-coumarate:coenzyme A ligase, partial	Lycium ruthenicum	NA	NA	NA	NA	NA
TR38005|c0_g1_i1	1266.06	339.188	-1.90018	0.0072141	0.479261	No	PREDICTED: BTB/POZ domain-containing protein At2g30600	Sesamum indicum	NA	NA	NA	NA	NA
TR41447|c3_g3_i2	80.0263	21.4429	-1.89997	0.0173245	0.67493	No	hypothetical protein MIMGU_mgv1a008790mg	Mimulus guttatus	NA	NA	zinc ion binding[GO:0008270]	NA	NA
TR20081|c0_g1_i1	160.053	42.8859	-1.89997	0.0138189	0.63148	No	PREDICTED: benzyl alcohol O-benzoyltransferase-like	Sesamum indicum	NA	NA	NA	NA	NA
TR37836|c2_g1_i4	320.105	85.7718	-1.89997	0.00848649	0.515001	No	hypothetical protein MIMGU_mgv1a006029mg	Mimulus guttatus	NA	NA	NA	NA	NA
TR30798|c0_g8_i2	1155.25	309.948	-1.89811	0.00694215	0.472807	No	cyclophilin, partial	Rhododendron micranthum	NA	NA	ATP binding[GO:0005524]	NA	NA
TR41663|c2_g8_i1	537.613	144.253	-1.89797	0.00659112	0.458802	No	RuBisCO subunit binding-protein beta subunit precursor	Arabidopsis thaliana	NA	NA	NA	NA	NA
TR7858|c0_g3_i2	551.976	148.151	-1.89754	0.00654848	0.457516	No	NA	NA	NA	NA	NA	NA	NA
TR34990|c0_g6_i7	94.39	25.3417	-1.89712	0.0174289	0.676215	No	PREDICTED: protein DEHYDRATION-INDUCED 19 homolog 3-like isoform X2	Sesamum indicum	NA	NA	NA	NA	NA
TR36212|c1_g2_i1	94.39	25.3417	-1.89712	0.0174289	0.676678	No	NA	NA	NA	NA	NA	NA	NA
TR44277|c4_g4_i1	94.39	25.3417	-1.89712	0.0174289	0.675754	No	PREDICTED: ETO1-like protein 1	Sesamum indicum	NA	NA	NA	NA	NA
TR44018|c3_g1_i2	188.78	50.6833	-1.89712	0.0126019	0.605073	No	PREDICTED: probable disease resistance RPP8-like protein 2	Sesamum indicum	NA	NA	NA	NA	NA
TR36830|c1_g1_i6	1378.91	370.378	-1.89646	0.0077091	0.494226	No	PREDICTED: pectinesterase 1-like	Sesamum indicum	NA	NA	NA	NA	NA
TR36250|c0_g1_i1	5776.26	1551.69	-1.8963	0.0351108	0.836547	No	PREDICTED: putative ion channel POLLUX-like 2 isoform X2	Sesamum indicum	NA	NA	NA	NA	NA
TR44346|c1_g1_i2	108.754	29.2404	-1.89503	0.0171243	0.670811	No	PREDICTED: uncharacterized protein LOC105159649	Sesamum indicum	NA	NA	NA	NA	NA
TR43910|c2_g8_i1	5772.15	1553.64	-1.89346	0.0353552	0.834321	No	glycine dehydrogenase [decarboxylating], mitochondrial, partial	Genlisea aurea	NA	glycine catabolic process[GO:0006546] ; oxidation-reduction process[GO:0055114]	glycine dehydrogenase (decarboxylating) activity[GO:0004375]	NA	map00260:Glycine, serine and threonine metabolism(dehydrogenase (aminomethyl-transferring)[ec:1.4.4.2])
TR44018|c3_g1_i3	123.117	33.1391	-1.89343	0.0163853	0.664788	No	NA	NA	NA	NA	NA	NA	NA
TR39786|c0_g1_i1	839.25	226.126	-1.89198	0.00647359	0.454519	No	PREDICTED: uncharacterized aarF domain-containing protein kinase At1g79600, chloroplastic	Sesamum indicum	NA	NA	NA	NA	NA
TR25805|c0_g1_i2	289.326	77.9744	-1.89162	0.00930784	0.535658	No	unknown	Populus trichocarpa	NA	methionine biosynthetic process[GO:0009086] ; methylation[GO:0032259]	zinc ion binding[GO:0008270] ; 5-methyltetrahydropteroyltriglutamate-homocysteine S-methyltransferase activity[GO:0003871]	NA	map00450:Selenocompound metabolism(S-methyltransferase[ec:2.1.1.14]) ; map00270:Cysteine and methionine metabolism(S-methyltransferase[ec:2.1.1.14])
TR37920|c0_g4_i2	289.326	77.9744	-1.89162	0.00930784	0.535116	No	PREDICTED: WAT1-related protein At3g02690, chloroplastic	Sesamum indicum	NA	NA	NA	NA	NA
TR3036|c1_g1_i3	578.652	155.949	-1.89162	0.00662152	0.459791	No	hypothetical protein MIMGU_mgv1a001772mg	Mimulus guttatus	NA	lipid metabolic process[GO:0006629]	glycerophosphodiester phosphodiesterase activity[GO:0008889]	integral component of membrane[GO:0016021]	map00564:Glycerophospholipid metabolism(phosphodiesterase[ec:3.1.4.46])
TR3956|c0_g4_i6	4401.45	1187.16	-1.89046	0.0255558	0.750956	No	PREDICTED: plastocyanin-like	Sesamum indicum	NA	NA	NA	NA	NA
TR42097|c1_g1_i1	166.208	44.8353	-1.89029	0.013943	0.634596	No	Uncharacterized protein isoform 1	Theobroma cacao	NA	protein autophosphorylation[GO:0046777] ; response to blue light[GO:0009637] ; regulation of proton transport[GO:0010155] ; cellular cation homeostasis[GO:0030003] ; divalent metal ion transport[GO:0070838]	NA	chloroplast thylakoid membrane[GO:0009535]	NA
TR35731|c3_g1_i5	180.572	48.734	-1.88958	0.013305	0.619456	No	NA	NA	NA	NA	NA	NA	NA
TR36875|c0_g2_i1	1307.1	352.834	-1.8893	0.00767676	0.494385	No	chloroplast PsbO2 precursor	Nicotiana benthamiana	NA	photosystem II stabilization[GO:0042549] ; photosynthesis[GO:0015979]	calcium ion binding[GO:0005509]	photosystem II oxygen evolving complex[GO:0009654] ; extrinsic component of membrane[GO:0019898] ; integral component of membrane[GO:0016021]	NA
TR36720|c0_g1_i1	570.444	153.999	-1.88916	0.00671078	0.463721	No	hypothetical protein POPTR_0005s27550g	Populus trichocarpa	NA	oxidation-reduction process[GO:0055114]	oxidoreductase activity, acting on the aldehyde or oxo group of donors, NAD or NADP as acceptor[GO:0016620]	NA	NA
TR39004|c0_g1_i1	209.3	56.5314	-1.88844	0.0120399	0.597796	No	PREDICTED: bifunctional riboflavin kinase/FMN phosphatase-like	Erythranthe guttatus	NA	NA	NA	NA	NA
TR35055|c0_g1_i1	1709.28	461.998	-1.88743	0.00937952	0.536522	No	NA	NA	NA	NA	NA	NA	NA
TR31373|c0_g3_i3	252.391	68.2276	-1.88723	0.0104478	0.559328	No	hypothetical protein MIMGU_mgv1a015050mg	Mimulus guttatus	NA	NA	NA	NA	NA
TR7708|c3_g2_i1	86.1822	23.3923	-1.88136	0.0183666	0.684541	No	PREDICTED: ACT domain-containing protein DS12, chloroplastic-like isoform X2	Sesamum indicum	NA	NA	NA	NA	NA
TR2824|c0_g6_i1	114.91	31.1897	-1.88136	0.0175289	0.676399	No	hypothetical protein MIMGU_mgv1a007176mg	Mimulus guttatus	NA	translational elongation[GO:0006414]	translation elongation factor activity[GO:0003746]	NA	NA
TR39234|c1_g5_i1	129.273	35.0885	-1.88136	0.0166066	0.668512	No	PREDICTED: peptidyl-prolyl cis-trans isomerase CYP38, chloroplastic	Nicotiana sylvestris	NA	NA	NA	NA	NA
TR29001|c0_g4_i2	129.273	35.0885	-1.88136	0.0166066	0.668986	No	NA	NA	NA	NA	NA	NA	NA
TR33095|c0_g5_i2	129.273	35.0885	-1.88136	0.0166066	0.668038	No	NA	NA	NA	NA	NA	NA	NA
TR34904|c0_g1_i1	143.637	38.9872	-1.88136	0.0156584	0.663742	No	NA	NA	NA	NA	NA	NA	NA
TR34904|c0_g2_i2	143.637	38.9872	-1.88136	0.0156584	0.664238	No	PREDICTED: uncharacterized protein LOC105953019	Erythranthe guttatus	NA	NA	NA	NA	NA
TR42531|c0_g1_i6	201.092	54.582	-1.88136	0.0127036	0.605856	No	unknown	Glycine max	NA	carbohydrate metabolic process[GO:0005975]	glycogen phosphorylase activity[GO:0008184]	NA	NA
TR14741|c0_g1_i1	43.0911	11.6962	-1.88136	0.00937739	0.536941	No	hypothetical protein MIMGU_mgv1a009762mg	Mimulus guttatus	NA	protein phosphorylation[GO:0006468] ; signal transduction[GO:0007165]	protein kinase activity[GO:0004672] ; ATP binding[GO:0005524]	integral component of membrane[GO:0016021]	NA
TR3439|c0_g2_i2	430.911	116.962	-1.88136	0.00772851	0.494355	No	unnamed protein product	Coffea canephora	NA	NA	NA	NA	NA
TR35719|c0_g1_i4	962.368	261.214	-1.88136	0.00695008	0.472215	No	PREDICTED: type I inositol 1,4,5-trisphosphate 5-phosphatase 1-like isoform X1	Sesamum indicum	NA	NA	NA	NA	NA
TR2383|c0_g6_i1	3906.93	1062.4	-1.87871	0.0229973	0.728132	No	PREDICTED: photosystem I reaction center subunit XI, chloroplastic	Sesamum indicum	NA	NA	NA	NA	NA
TR29817|c0_g2_i1	437.067	118.911	-1.87797	0.00777503	0.494546	No	NA	NA	NA	NA	NA	NA	NA
TR33108|c0_g1_i1	443.223	120.86	-1.87469	0.00782073	0.496897	No	PREDICTED: uncharacterized protein LOC104246111 isoform X1	Nicotiana sylvestris	NA	NA	NA	NA	NA
TR26133|c0_g1_i3	192.884	52.6327	-1.8737	0.0134243	0.621953	No	hypothetical protein MIMGU_mgv1a026849mg	Mimulus guttatus	NA	NA	NA	integral component of membrane[GO:0016021]	NA
TR35055|c0_g2_i1	39846.9	10877.4	-1.87313	0.322477	1.16528	No	PREDICTED: thiamine thiazole synthase 2, chloroplastic-like	Sesamum indicum	NA	NA	NA	NA	NA
TR3217|c0_g2_i7	313.949	85.7718	-1.87196	0.00951379	0.536637	No	PREDICTED: glucan endo-1,3-beta-glucosidase, basic isoform-like	Prunus mume	NA	NA	NA	NA	NA
TR40395|c1_g1_i3	149.793	40.9365	-1.87151	0.0157626	0.665673	No	NA	NA	NA	NA	NA	NA	NA
TR29330|c0_g5_i3	449.379	122.81	-1.87151	0.00786572	0.498083	No	PREDICTED: uncharacterized protein LOC105172026	Sesamum indicum	NA	NA	NA	NA	NA
TR25659|c0_g5_i1	256.495	70.1769	-1.86986	0.01097	0.574821	No	hypothetical protein M569_00899, partial	Genlisea aurea	NA	NA	ATP binding[GO:0005524]	NA	NA
TR36184|c0_g2_i1	1538.97	421.062	-1.86986	0.00924324	0.533562	No	hypothetical protein MIMGU_mgv1a005821mg	Mimulus guttatus	NA	oxidation-reduction process[GO:0055114]	oxidoreductase activity, acting on the aldehyde or oxo group of donors, disulfide as acceptor[GO:0016624]	NA	NA
TR32797|c2_g1_i2	619.691	169.594	-1.86946	0.00713732	0.478074	No	PREDICTED: probable S-adenosylmethionine-dependent methyltransferase At5g37990	Sesamum indicum	NA	NA	NA	NA	NA
TR38054|c0_g1_i9	106.702	29.2404	-1.86755	0.0187463	0.690536	No	PREDICTED: maltose excess protein 1-like, chloroplastic	Sesamum indicum	NA	NA	NA	NA	NA
TR31925|c1_g1_i5	199.04	54.582	-1.86656	0.0134475	0.620496	No	PREDICTED: protein DA1-related 1-like isoform X2	Phoenix dactylifera	NA	NA	NA	NA	NA
TR33825|c0_g1_i5	199.04	54.582	-1.86656	0.0134475	0.621	No	hypothetical protein MIMGU_mgv1a009284mg	Mimulus guttatus	NA	NA	NA	membrane[GO:0016020]	NA
TR44215|c1_g7_i2	92.3381	25.3417	-1.86541	0.019248	0.695486	No	PREDICTED: probable galactinol--sucrose galactosyltransferase 2	Sesamum indicum	NA	NA	NA	NA	NA
TR685|c0_g1_i1	184.676	50.6833	-1.86541	0.0142053	0.638854	No	NA	NA	NA	NA	NA	NA	NA
TR41447|c3_g1_i3	248.287	68.2276	-1.86358	0.0114931	0.584965	No	hypothetical protein MIMGU_mgv1a008790mg	Mimulus guttatus	NA	NA	zinc ion binding[GO:0008270]	NA	NA
TR32549|c0_g1_i2	77.9744	21.4429	-1.8625	0.0194319	0.696374	No	PREDICTED: GDSL esterase/lipase At1g33811-like	Sesamum indicum	NA	NA	NA	NA	NA
TR41672|c0_g2_i2	77.9744	21.4429	-1.8625	0.0194319	0.695496	No	PREDICTED: NAC domain-containing protein 78-like	Sesamum indicum	NA	NA	NA	NA	NA
TR42320|c0_g4_i5	77.9744	21.4429	-1.8625	0.0194319	0.695058	No	PREDICTED: FGGY carbohydrate kinase domain-containing protein isoform X2	Populus euphratica	NA	NA	NA	NA	NA
TR42679|c0_g5_i1	77.9744	21.4429	-1.8625	0.0194319	0.696814	No	PREDICTED: zinc finger CCCH domain-containing protein 48-like	Sesamum indicum	NA	NA	NA	NA	NA
TR43266|c0_g4_i9	77.9744	21.4429	-1.8625	0.0194319	0.695935	No	CONSTANS-like protein 9	Tectona grandis	Lamiaceae	NA	NA	NA	NA
TR37246|c0_g1_i5	3153.86	867.465	-1.86224	0.0190098	0.692164	No	PREDICTED: protein TIC 62, chloroplastic	Sesamum indicum	NA	NA	NA	NA	NA
TR37882|c0_g2_i2	906.965	249.518	-1.8619	0.00741564	0.486392	No	PREDICTED: dnaJ protein P58IPK homolog	Sesamum indicum	NA	NA	NA	NA	NA
TR2523|c0_g3_i2	141.585	38.9872	-1.8606	0.0168628	0.670746	No	PREDICTED: chlorophyll a-b binding protein 21, chloroplastic-like	Sesamum indicum	NA	NA	NA	NA	NA
TR40184|c0_g1_i1	410.391	113.063	-1.85988	0.00860145	0.518103	No	PREDICTED: probable starch synthase 4, chloroplastic/amyloplastic isoform X1	Sesamum indicum	NA	NA	NA	NA	NA
TR35491|c1_g3_i2	948.004	261.214	-1.85966	0.00756087	0.491942	No	hypothetical protein MIMGU_mgv1a012489mg	Mimulus guttatus	NA	plant-type cell wall organization[GO:0009664]	NA	extracellular region[GO:0005576] ; cell wall[GO:0005618] ; membrane[GO:0016020]	NA
TR43864|c1_g6_i7	664.834	183.24	-1.85926	0.0073671	0.484888	No	hypothetical protein MIMGU_mgv1a001787mg	Mimulus guttatus	NA	metabolic process[GO:0008152]	catalytic activity[GO:0003824]	NA	NA
TR2813|c0_g2_i1	63.6107	17.5442	-1.85827	0.0185048	0.686989	No	PREDICTED: neutral ceramidase isoform X1	Sesamum indicum	NA	NA	NA	NA	NA
TR30848|c1_g2_i1	63.6107	17.5442	-1.85827	0.0185048	0.688338	No	NA	NA	NA	NA	NA	NA	NA
TR32920|c1_g1_i1	63.6107	17.5442	-1.85827	0.0185048	0.687888	No	PREDICTED: cytochrome c6, chloroplastic	Erythranthe guttatus	NA	NA	NA	NA	NA
TR34830|c2_g2_i3	63.6107	17.5442	-1.85827	0.0185048	0.685644	No	PREDICTED: uncharacterized protein LOC105155212	Sesamum indicum	NA	NA	NA	NA	NA
TR36096|c0_g3_i8	63.6107	17.5442	-1.85827	0.0185048	0.68654	No	PREDICTED: IAA-amino acid hydrolase ILR1-like 2	Sesamum indicum	NA	NA	NA	NA	NA
TR36115|c0_g7_i5	63.6107	17.5442	-1.85827	0.0185048	0.686092	No	PREDICTED: heterogeneous nuclear ribonucleoprotein A1-like 2	Sesamum indicum	NA	NA	NA	NA	NA
TR41480|c0_g2_i3	63.6107	17.5442	-1.85827	0.0185048	0.687438	No	hypothetical protein MIMGU_mgv1a004394mg	Mimulus guttatus	NA	NA	NA	NA	NA
TR40436|c0_g2_i1	127.221	35.0885	-1.85827	0.0179939	0.684576	No	hypothetical protein MIMGU_mgv1a004360mg	Mimulus guttatus	NA	NA	NA	NA	NA
TR2188|c0_g1_i6	254.443	70.1769	-1.85827	0.0114938	0.584478	No	hypothetical protein MIMGU_mgv1a014044mg	Mimulus guttatus	NA	response to stress[GO:0006950]	NA	NA	NA
TR32143|c0_g2_i3	445.275	122.81	-1.85827	0.00831346	0.509949	No	PREDICTED: uncharacterized protein LOC105167031	Sesamum indicum	NA	NA	NA	NA	NA
TR36472|c4_g1_i1	112.858	31.1897	-1.85536	0.0191229	0.694502	No	NA	NA	NA	NA	NA	NA	NA
TR37801|c0_g1_i1	112.858	31.1897	-1.85536	0.0191229	0.694058	No	PREDICTED: alcohol dehydrogenase 1B	Sesamum indicum	NA	NA	NA	NA	NA
TR30662|c1_g1_i4	162.105	44.8353	-1.85422	0.0159064	0.662874	No	PREDICTED: endoglucanase 6	Sesamum indicum	NA	NA	NA	NA	NA
TR35347|c1_g1_i3	162.105	44.8353	-1.85422	0.0159064	0.663361	No	nucleoside diphosphate kinase	Solanum tuberosum	NA	nucleoside diphosphate phosphorylation[GO:0006165] ; UTP biosynthetic process[GO:0006228] ; GTP biosynthetic process[GO:0006183] ; CTP biosynthetic process[GO:0006241]	nucleoside diphosphate kinase activity[GO:0004550] ; ATP binding[GO:0005524]	NA	map01130:Biosynthesis of antibiotics(kinase[ec:2.7.4.6]) ; map00240:Pyrimidine metabolism(kinase[ec:2.7.4.6]) ; map00230:Purine metabolism(kinase[ec:2.7.4.6])
TR33862|c0_g2_i2	98.4939	27.291	-1.85161	0.020004	0.700956	No	hypothetical protein M569_12052, partial	Genlisea aurea	NA	metabolic process[GO:0008152]	ATPase activity[GO:0016887] ; ATP binding[GO:0005524]	integral component of membrane[GO:0016021]	map00230:Purine metabolism(adenylpyrophosphatase[ec:3.6.1.3])
TR1484|c0_g1_i1	49.247	13.6455	-1.85161	0.0139938	0.63589	No	PREDICTED: 26S proteasome non-ATPase regulatory subunit 6	Vitis vinifera	NA	response to cytokinin[GO:0009735] ; response to misfolded protein[GO:0051788] ; fatty acid beta-oxidation[GO:0006635] ; protein maturation[GO:0051604] ; toxin catabolic process[GO:0009407] ; proteasome core complex assembly[GO:0080129] ; regulation of unidimensional cell growth[GO:0051510] ; root hair elongation[GO:0048767] ; cullin deneddylation[GO:0010388] ; photomorphogenesis[GO:0009640] ; pro…	NA	cytosol[GO:0005829] ; plasma membrane[GO:0005886] ; nucleus[GO:0005634]	NA
TR39056|c0_g4_i1	49.247	13.6455	-1.85161	0.0139938	0.635381	No	PREDICTED: DNA damage-inducible protein 1	Sesamum indicum	NA	NA	NA	NA	NA
TR35041|c0_g9_i2	246.235	68.2276	-1.85161	0.0120569	0.598119	No	PREDICTED: probable ribose-5-phosphate isomerase 3, chloroplastic	Sesamum indicum	NA	NA	NA	NA	NA
TR37674|c0_g3_i1	295.482	81.8731	-1.85161	0.0106133	0.564989	No	cytochrome P450 monooxygenase	Sesamum indicum	NA	oxidation-reduction process[GO:0055114]	heme binding[GO:0020037] ; oxidoreductase activity, acting on paired donors, with incorporation or reduction of molecular oxygen[GO:0016705] ; monooxygenase activity[GO:0004497] ; iron ion binding[GO:0005506]	NA	NA
TR40069|c0_g1_i2	133.377	37.0378	-1.84844	0.0181066	0.68201	No	PREDICTED: rhodanese-like domain-containing protein 8, chloroplastic	Sesamum indicum	NA	NA	NA	NA	NA
TR31912|c1_g9_i2	3490.38	970.781	-1.84617	0.0224252	0.722914	No	PREDICTED: ATP synthase subunit b', chloroplastic	Sesamum indicum	NA	NA	NA	NA	NA
TR31405|c0_g1_i4	238.027	66.2782	-1.84452	0.012676	0.605557	No	PREDICTED: uncharacterized protein LOC105170974 isoform X1	Sesamum indicum	NA	NA	NA	NA	NA
TR32504|c2_g5_i1	153.897	42.8859	-1.84339	0.0169716	0.673657	No	actin	Ipomoea nil	NA	NA	NA	NA	NA
TR43187|c2_g6_i3	650.47	181.29	-1.84318	0.00787538	0.497586	No	PREDICTED: oligopeptide transporter 5-like	Sesamum indicum	NA	NA	NA	NA	NA
TR20669|c0_g1_i1	188.78	52.6327	-1.84268	0.0150925	0.652909	No	PREDICTED: coatomer subunit zeta-1-like	Sesamum indicum	NA	NA	NA	NA	NA
TR685|c0_g2_i1	223.663	62.3795	-1.84218	0.0133921	0.621982	No	NA	NA	NA	NA	NA	NA	NA
TR32682|c4_g2_i4	293.43	81.8731	-1.84155	0.0110518	0.575922	No	PREDICTED: bifunctional epoxide hydrolase 2-like	Solanum tuberosum	NA	NA	NA	NA	NA
TR30997|c0_g5_i1	69.7665	19.4936	-1.83954	0.020453	0.705803	No	PREDICTED: probable WRKY transcription factor 40	Sesamum indicum	NA	NA	NA	NA	NA
TR3554|c0_g2_i2	69.7665	19.4936	-1.83954	0.020453	0.706232	No	PREDICTED: probable receptor-like protein kinase At5g24010	Sesamum indicum	NA	NA	NA	NA	NA
TR41611|c0_g8_i1	69.7665	19.4936	-1.83954	0.020453	0.705375	No	PREDICTED: uncharacterized protein LOC105167842	Sesamum indicum	NA	NA	NA	NA	NA
TR31667|c1_g1_i4	139.533	38.9872	-1.83954	0.0181665	0.681107	No	hypothetical protein MIMGU_mgv1a023290mg	Mimulus guttatus	NA	NA	NA	NA	NA
TR40973|c1_g2_i2	139.533	38.9872	-1.83954	0.0181665	0.681557	No	unnamed protein product	Coffea canephora	NA	transmembrane transport[GO:0055085]	NA	integral component of membrane[GO:0016021]	NA
TR42743|c2_g1_i3	34.8833	9.74679	-1.83954	0.00592867	0.435083	No	PREDICTED: vacuolar protein 8	Sesamum indicum	NA	NA	NA	NA	NA
TR33382|c1_g5_i2	34.8833	9.74679	-1.83954	0.00592867	0.435646	No	NA	NA	NA	NA	NA	NA	NA
TR24653|c0_g1_i1	474.002	132.556	-1.83829	0.00873342	0.518898	No	PREDICTED: protein transport protein Sec61 subunit beta	Cucumis melo	NA	NA	NA	NA	NA
TR43009|c2_g7_i2	1218.86	341.138	-1.83711	0.0091054	0.52829	No	TPA: putative heat shock protein 90 family protein	Zea mays	NA	NA	NA	NA	NA
TR37090|c0_g1_i2	125.169	35.0885	-1.83481	0.0195049	0.694605	No	NA	NA	NA	NA	NA	NA	NA
TR36984|c0_g1_i2	305.742	85.7718	-1.83374	0.0110969	0.577209	No	PREDICTED: uncharacterized protein LOC105163168	Sesamum indicum	NA	NA	NA	NA	NA
TR29548|c1_g2_i4	90.2861	25.3417	-1.83299	0.0212865	0.716714	No	PREDICTED: probably inactive leucine-rich repeat receptor-like protein kinase At3g28040	Sesamum indicum	NA	NA	NA	NA	NA
TR3986|c0_g3_i3	361.144	101.367	-1.83299	0.0101771	0.552645	No	PREDICTED: short-chain dehydrogenase TIC 32, chloroplastic-like isoform X2	Erythranthe guttatus	NA	NA	NA	NA	NA
TR31433|c0_g1_i1	326.261	91.6199	-1.83229	0.0107741	0.567174	No	hypothetical protein MIMGU_mgv11b018128mg	Mimulus guttatus	NA	NA	NA	NA	NA
TR44246|c1_g3_i1	1733.9	487.34	-1.83102	0.0117898	0.592106	No	PREDICTED: elongation factor G-1, chloroplastic	Sesamum indicum	NA	NA	NA	NA	NA
TR37895|c0_g1_i2	402.184	113.063	-1.83073	0.00970335	0.541947	No	hypothetical protein MIMGU_mgv1a003718mg	Mimulus guttatus	NA	metabolic process[GO:0008152]	catalytic activity[GO:0003824]	NA	NA
TR29215|c0_g1_i3	422.703	118.911	-1.82976	0.00950206	0.536508	No	PREDICTED: stress enhanced protein 1, chloroplastic-like	Sesamum indicum	NA	NA	NA	NA	NA
TR33147|c0_g12_i1	55.4028	15.5949	-1.82889	0.0180779	0.683197	No	hypothetical protein MIMGU_mgv1a000127mg	Mimulus guttatus	NA	vesicle-mediated transport[GO:0016192] ; intracellular protein transport[GO:0006886]	structural molecule activity[GO:0005198]	clathrin coat of coated pit[GO:0030132] ; clathrin coat of trans-Golgi network vesicle[GO:0030130]	NA
TR3629|c2_g2_i1	55.4028	15.5949	-1.82889	0.0180779	0.682289	No	PREDICTED: 15 kDa selenoprotein	Sesamum indicum	NA	NA	NA	NA	NA
TR38298|c0_g3_i2	55.4028	15.5949	-1.82889	0.0180779	0.682743	No	PREDICTED: ethylene-responsive transcription factor ERF118-like	Sesamum indicum	NA	NA	NA	NA	NA
TR37078|c0_g2_i5	166.208	46.7846	-1.82889	0.0170171	0.669847	No	H(\+)-transporting atpase plant/fungi plasma membrane type, putative	Ricinus communis	NA	hydrogen ion transmembrane transport[GO:1902600] ; metabolic process[GO:0008152]	hydrogen-exporting ATPase activity, phosphorylative mechanism[GO:0008553] ; metal ion binding[GO:0046872] ; ATP binding[GO:0005524]	integral component of membrane[GO:0016021]	map00190:Oxidative phosphorylation(ATPase[ec:3.6.3.6])
TR3986|c0_g3_i15	221.611	62.3795	-1.82889	0.0141045	0.639383	No	PREDICTED: short-chain dehydrogenase TIC 32, chloroplastic-like isoform X1	Erythranthe guttatus	NA	NA	NA	NA	NA
TR42160|c1_g1_i1	408.339	115.012	-1.82798	0.00972984	0.54236	No	PREDICTED: probable 28S rRNA (cytosine-C(5))-methyltransferase isoform X2	Sesamum indicum	NA	NA	NA	NA	NA
TR33898|c1_g4_i1	131.325	37.0378	-1.82607	0.0195688	0.693404	No	PREDICTED: clavaminate synthase-like protein At3g21360	Sesamum indicum	NA	NA	NA	NA	NA
TR38649|c0_g1_i4	131.325	37.0378	-1.82607	0.0195688	0.692972	No	PREDICTED: probable LRR receptor-like serine/threonine-protein kinase At4g36180	Sesamum indicum	NA	NA	NA	NA	NA
TR42174|c0_g2_i1	131.325	37.0378	-1.82607	0.0195688	0.693837	No	PREDICTED: glucan endo-1,3-beta-glucosidase 1	Sesamum indicum	NA	NA	NA	NA	NA
TR34069|c0_g4_i1	525.301	148.151	-1.82607	0.00881645	0.520564	No	hypothetical protein MIMGU_mgv1a008007mg	Mimulus guttatus	NA	proteolysis[GO:0006508]	serine-type endopeptidase activity[GO:0004252]	NA	NA
TR43440|c0_g2_i1	207.248	58.4808	-1.82532	0.0149887	0.652891	No	hypothetical protein MIMGU_mgv1a003196mg	Mimulus guttatus	NA	NA	NA	NA	NA
TR40635|c1_g2_i1	75.9224	21.4429	-1.82402	0.0218255	0.724978	No	PREDICTED: phosphoglucan phosphatase DSP4, amyloplastic-like isoform X3	Populus euphratica	NA	NA	NA	NA	NA
TR42225|c1_g1_i3	683.302	192.987	-1.82402	0.00846392	0.515283	No	PREDICTED: cellulose synthase-like protein G3	Sesamum indicum	NA	NA	NA	NA	NA
TR32278|c0_g2_i1	683.302	192.987	-1.82402	0.00846392	0.514732	No	hypothetical protein MIMGU_mgv1a008735mg	Mimulus guttatus	NA	NA	NA	NA	NA
TR39277|c1_g1_i3	324.209	91.6199	-1.82319	0.0111752	0.578106	No	hypothetical protein MIMGU_mgv1a002844mg	Mimulus guttatus	NA	L-serine biosynthetic process[GO:0006564] ; oxidation-reduction process[GO:0055114]	NAD binding[GO:0051287] ; phosphoglycerate dehydrogenase activity[GO:0004617] ; amino acid binding[GO:0016597]	NA	map00260:Glycine, serine and threonine metabolism(dehydrogenase[ec:1.1.1.95]) ; map01130:Biosynthesis of antibiotics(dehydrogenase[ec:1.1.1.95]) ; map00680:Methane metabolism(dehydrogenase[ec:1.1.1.95])
TR32035|c0_g3_i4	172.364	48.734	-1.82246	0.0170327	0.669069	No	alcohol acetyltransferase	Lavandula x intermedia	NA	NA	transferase activity[GO:0016740]	NA	NA
TR28695|c0_g1_i2	3736.61	1056.55	-1.82237	0.0260899	0.751106	No	hypothetical protein MIMGU_mgv1a017579mg	Mimulus guttatus	NA	NA	NA	NA	NA
TR23928|c0_g1_i2	96.442	27.291	-1.82123	0.0220041	0.724553	No	PREDICTED: 29 kDa ribonucleoprotein A, chloroplastic	Sesamum indicum	NA	NA	NA	NA	NA
TR30112|c0_g1_i4	96.442	27.291	-1.82123	0.0220041	0.724973	No	PREDICTED: uncharacterized protein LOC105177328	Sesamum indicum	NA	NA	NA	NA	NA
TR42543|c1_g1_i6	96.442	27.291	-1.82123	0.0220041	0.725815	No	SEU3B protein	Antirrhinum majus	NA	NA	NA	NA	NA
TR48039|c0_g1_i1	96.442	27.291	-1.82123	0.0220041	0.725394	No	hypothetical protein MIMGU_mgv1a014264mg	Mimulus guttatus	NA	carbohydrate metabolic process[GO:0005975]	hydrolase activity, hydrolyzing O-glycosyl compounds[GO:0004553]	NA	NA
TR33385|c0_g1_i1	447.327	126.708	-1.81982	0.00961134	0.539994	No	PREDICTED: cytochrome P450 84A1-like	Sesamum indicum	NA	NA	NA	NA	NA
TR4078|c2_g1_i6	447.327	126.708	-1.81982	0.00961134	0.53946	No	PREDICTED: uncharacterized protein LOC105173489 isoform X1	Sesamum indicum	NA	NA	NA	NA	NA
TR33894|c1_g2_i1	116.962	33.1391	-1.81943	0.0210656	0.716066	No	hypothetical protein MIMGU_mgv1a016994mg	Mimulus guttatus	NA	NA	NA	NA	NA
TR35838|c1_g4_i2	116.962	33.1391	-1.81943	0.0210656	0.716494	No	NA	NA	NA	NA	NA	NA	NA
TR36995|c0_g2_i2	2152.5	610.149	-1.81878	0.0149659	0.653406	No	secretory peroxidase	Avicennia marina	NA	cellular oxidant detoxification[GO:0098869] ; response to oxidative stress[GO:0006979] ; hydrogen peroxide catabolic process[GO:0042744] ; oxidation-reduction process[GO:0055114]	metal ion binding[GO:0046872] ; heme binding[GO:0020037] ; peroxidase activity[GO:0004601]	extracellular region[GO:0005576]	map00940:Phenylpropanoid biosynthesis(lactoperoxidase[ec:1.11.1.7])
TR3004|c0_g1_i3	137.481	38.9872	-1.81816	0.0195781	0.69244	No	hypothetical protein MIMGU_mgv1a014101mg	Mimulus guttatus	NA	NA	NA	NA	NA
TR34996|c1_g4_i4	199.04	56.5314	-1.81593	0.0159054	0.663809	No	PREDICTED: cytochrome b-c1 complex subunit Rieske-4, mitochondrial-like	Sesamum indicum	NA	NA	NA	NA	NA
TR29355|c0_g1_i6	240.079	68.2276	-1.81508	0.0139315	0.634583	No	PREDICTED: LOW QUALITY PROTEIN: protein LOW PSII ACCUMULATION 2, chloroplastic	Sesamum indicum	NA	NA	NA	NA	NA
TR42933|c0_g3_i1	1323.51	376.226	-1.8147	0.0103965	0.560279	No	PREDICTED: beta-galactosidase 8-like	Sesamum indicum	NA	NA	NA	NA	NA
TR3439|c0_g2_i3	582.756	165.696	-1.81436	0.00898429	0.525017	No	PREDICTED: uncharacterized protein LOC105966158	Erythranthe guttatus	NA	NA	NA	NA	NA
TR39361|c0_g4_i3	342.677	97.4679	-1.81385	0.0112288	0.577721	No	PREDICTED: uncharacterized protein LOC105169804	Sesamum indicum	NA	NA	NA	NA	NA
TR34256|c0_g7_i1	82.0783	23.3923	-1.81097	0.0228138	0.725151	No	PREDICTED: bifunctional riboflavin biosynthesis protein RIBA 1, chloroplastic-like	Sesamum indicum	NA	NA	NA	NA	NA
TR42400|c0_g2_i1	82.0783	23.3923	-1.81097	0.0228138	0.724746	No	NA	NA	NA	NA	NA	NA	NA
TR25741|c0_g1_i3	61.5587	17.5442	-1.81097	0.021092	0.716107	No	hypothetical protein MIMGU_mgv1a0043831mg, partial	Mimulus guttatus	NA	NA	calcium ion binding[GO:0005509]	NA	NA
TR38702|c1_g4_i1	61.5587	17.5442	-1.81097	0.021092	0.715251	No	NA	NA	NA	NA	NA	NA	NA
TR39905|c0_g2_i1	61.5587	17.5442	-1.81097	0.021092	0.715679	No	PREDICTED: adenosine kinase	Sesamum indicum	NA	NA	NA	NA	NA
TR30280|c1_g2_i1	143.637	40.9365	-1.81097	0.0195499	0.694035	No	hypothetical protein B456_009G064300	Gossypium raimondii	NA	NA	unfolded protein binding[GO:0051082] ; heat shock protein binding[GO:0031072]	NA	NA
TR29865|c0_g4_i1	184.676	52.6327	-1.81097	0.0169786	0.672994	No	PREDICTED: shaggy-related protein kinase alpha	Sesamum indicum	NA	NA	NA	NA	NA
TR35838|c1_g3_i1	184.676	52.6327	-1.81097	0.0169786	0.673464	No	NA	NA	NA	NA	NA	NA	NA
TR36496|c1_g1_i1	41.0391	11.6962	-1.81097	0.0109767	0.574115	No	PREDICTED: pentatricopeptide repeat-containing protein At2g35130	Erythranthe guttatus	NA	NA	NA	NA	NA
TR43807|c0_g3_i1	252.391	72.1263	-1.80706	0.0138114	0.631645	No	basic helix-loop-helix transcription factor	Salvia miltiorrhiza	NA	NA	protein dimerization activity[GO:0046983]	NA	NA
TR3056|c0_g2_i3	211.352	60.4301	-1.8063	0.0157448	0.665418	No	hypothetical protein CISIN_1g031432mg	Citrus sinensis	NA	translational frameshifting[GO:0006452] ; positive regulation of translational termination[GO:0045905] ; positive regulation of translational elongation[GO:0045901]	translation elongation factor activity[GO:0003746] ; ribosome binding[GO:0043022]	NA	NA
TR2438|c0_g1_i1	129.273	37.0378	-1.80335	0.0211571	0.715323	No	PREDICTED: chaperone protein dnaJ 11, chloroplastic-like	Sesamum indicum	NA	NA	NA	NA	NA
TR27557|c0_g1_i2	129.273	37.0378	-1.80335	0.0211571	0.714473	No	hypothetical protein MIMGU_mgv1a009574mg	Mimulus guttatus	NA	NA	NA	NA	NA
TR33439|c0_g3_i1	129.273	37.0378	-1.80335	0.0211571	0.714898	No	unknown	Lotus japonicus	NA	photosynthesis, light harvesting[GO:0009765] ; protein-chromophore linkage[GO:0018298]	chlorophyll binding[GO:0016168]	photosystem II[GO:0009523] ; integral component of membrane[GO:0016021] ; chloroplast[GO:0009507]	NA
TR38009|c0_g1_i1	435.015	124.759	-1.80192	0.0104157	0.55972	No	NA	NA	NA	NA	NA	NA	NA
TR28695|c0_g1_i6	10945.1	3142.37	-1.80037	0.0952105	1.02717	No	hypothetical protein MIMGU_mgv1a017579mg	Mimulus guttatus	NA	NA	NA	NA	NA
TR25329|c0_g1_i2	88.2341	25.3417	-1.79983	0.0235733	0.732887	No	PREDICTED: uncharacterized protein LOC105172555	Sesamum indicum	NA	NA	NA	NA	NA
TR41627|c1_g4_i1	88.2341	25.3417	-1.79983	0.0235733	0.733288	No	PREDICTED: uncharacterized protein LOC105161687 isoform X2	Sesamum indicum	NA	NA	NA	NA	NA
TR38847|c2_g1_i3	176.468	50.6833	-1.79983	0.018085	0.682103	No	PREDICTED: mitogen-activated protein kinase kinase kinase 2-like	Sesamum indicum	NA	NA	NA	NA	NA
TR2741|c1_g1_i2	644.314	185.189	-1.79877	0.00940186	0.536718	No	PREDICTED: flavanone 3-dioxygenase-like	Sesamum indicum	NA	NA	NA	NA	NA
TR2653|c2_g1_i4	2000.66	575.061	-1.79869	0.0150594	0.653466	No	hypothetical protein MIMGU_mgv1a015294mg	Mimulus guttatus	NA	NA	iron ion binding[GO:0005506]	integral component of membrane[GO:0016021]	NA
TR33651|c0_g1_i3	155.949	44.8353	-1.79837	0.0194321	0.694628	No	PREDICTED: uncharacterized protein Os08g0359500	Sesamum indicum	NA	NA	NA	NA	NA
TR37234|c0_g4_i1	67.7146	19.4936	-1.79647	0.0231638	0.729338	No	PREDICTED: uncharacterized protein LOC105174471	Sesamum indicum	NA	NA	NA	NA	NA
TR38495|c0_g3_i2	67.7146	19.4936	-1.79647	0.0231638	0.728934	No	hypothetical protein MIMGU_mgv1a011199mg	Mimulus guttatus	NA	NA	NA	integral component of membrane[GO:0016021]	NA
TR43846|c1_g3_i2	67.7146	19.4936	-1.79647	0.0231638	0.72853	No	PREDICTED: calmodulin-binding transcription activator 2	Sesamum indicum	NA	NA	NA	NA	NA
TR41663|c2_g4_i2	744.86	214.429	-1.79647	0.00942707	0.533866	No	AT1G55490	Arabidopsis thaliana	NA	NA	NA	NA	NA
TR38013|c0_g1_i1	500.677	144.253	-1.79528	0.0100913	0.549039	No	PREDICTED: serine/arginine repetitive matrix protein 1 isoform X1	Erythranthe guttatus	NA	NA	NA	NA	NA
TR41451|c2_g1_i2	595.067	171.544	-1.79448	0.00967263	0.540763	No	PREDICTED: uncharacterized protein LOC104239662	Nicotiana sylvestris	NA	NA	NA	NA	NA
TR35673|c0_g6_i3	162.105	46.7846	-1.79282	0.0193616	0.694732	No	PREDICTED: PRA1 family protein A1	Sesamum indicum	NA	NA	NA	NA	NA
TR4056|c0_g2_i1	2134.03	615.997	-1.79259	0.0163201	0.664993	No	PREDICTED: hypersensitive-induced response protein 1	Sesamum indicum	NA	NA	NA	NA	NA
TR32120|c0_g1_i4	418.599	120.86	-1.79223	0.010995	0.573487	No	PREDICTED: protein MEMO1 isoform X1	Sesamum indicum	NA	NA	NA	NA	NA
TR41260|c0_g1_i1	1592.32	460.049	-1.79127	0.0128355	0.610101	No	PREDICTED: hsp70-Hsp90 organizing protein 3-like	Sesamum indicum	NA	NA	NA	NA	NA
TR43123|c0_g7_i2	843.354	243.67	-1.79121	0.00972304	0.542513	No	PREDICTED: peptidyl-prolyl cis-trans isomerase FKBP62	Sesamum indicum	NA	NA	NA	NA	NA
TR43836|c1_g2_i3	94.39	27.291	-1.79021	0.0242187	0.737611	No	PREDICTED: serine/threonine-protein phosphatase 6 regulatory subunit 3	Sesamum indicum	NA	NA	NA	NA	NA
TR13462|c0_g1_i2	47.195	13.6455	-1.79021	0.0161767	0.665837	No	hypothetical protein POPTR_0006s11720g	Populus trichocarpa	NA	base-excision repair[GO:0006284]	catalytic activity[GO:0003824] ; 4 iron, 4 sulfur cluster binding[GO:0051539]	NA	NA
TR24701|c0_g2_i1	47.195	13.6455	-1.79021	0.0161767	0.66632	No	NA	NA	NA	NA	NA	NA	NA
TR37194|c1_g1_i4	47.195	13.6455	-1.79021	0.0161767	0.667287	No	Senescence-associated protein, putative	Solanum demissum	NA	NA	NA	integral component of membrane[GO:0016021]	NA
TR3863|c0_g1_i2	47.195	13.6455	-1.79021	0.0161767	0.664873	No	hypothetical protein MIMGU_mgv1a015081mg	Mimulus guttatus	NA	NA	calcium ion binding[GO:0005509]	NA	NA
TR38702|c0_g1_i1	47.195	13.6455	-1.79021	0.0161767	0.666803	No	transcription factor MYC2	Salvia miltiorrhiza	NA	NA	NA	NA	NA
TR38954|c0_g2_i1	47.195	13.6455	-1.79021	0.0161767	0.665355	No	hypothetical protein MIMGU_mgv1a011993mg	Mimulus guttatus	NA	NA	NA	integral component of membrane[GO:0016021]	NA
TR38798|c0_g1_i2	755.12	218.328	-1.79021	0.00966749	0.541008	No	PREDICTED: non-specific phospholipase C3-like	Sesamum indicum	NA	NA	NA	NA	NA
TR34967|c0_g1_i6	262.65	76.025	-1.7886	0.0143182	0.640891	No	PREDICTED: mechanosensitive ion channel protein 2, chloroplastic-like	Sesamum indicum	NA	NA	NA	NA	NA
TR31469|c0_g2_i1	215.455	62.3795	-1.78825	0.0164909	0.667641	No	R2R3-MYB protein	Rehmannia glutinosa	NA	NA	NA	NA	NA
TR29043|c0_g4_i2	646.366	187.138	-1.78825	0.00979534	0.543345	No	hypothetical protein MIMGU_mgv1a015384mg	Mimulus guttatus	NA	NA	NA	NA	NA
TR31880|c4_g3_i1	7007.43	2029.28	-1.78792	0.0586948	0.938341	No	hypothetical protein MIMGU_mgv1a012938mg	Mimulus guttatus	NA	peroxisome fission[GO:0016559]	NA	integral component of peroxisomal membrane[GO:0005779]	NA
TR3659|c1_g2_i2	168.26	48.734	-1.7877	0.0192928	0.696221	No	PREDICTED: arogenate dehydratase/prephenate dehydratase 6, chloroplastic-like	Sesamum indicum	NA	NA	NA	NA	NA
TR33220|c0_g2_i3	289.326	83.8224	-1.78729	0.013523	0.623475	No	hypothetical protein MIMGU_mgv1a011581mg	Mimulus guttatus	NA	NA	nucleic acid binding[GO:0003676] ; nucleotide binding[GO:0000166]	NA	NA
TR30583|c0_g2_i2	242.131	70.1769	-1.78672	0.0152506	0.657743	No	PREDICTED: multiprotein-bridging factor 1a-like	Sesamum indicum	NA	NA	NA	NA	NA
TR33020|c0_g6_i3	2185.33	633.542	-1.78634	0.0170562	0.669528	No	hypothetical protein MIMGU_mgv1a014490mg	Mimulus guttatus	NA	translation[GO:0006412]	structural constituent of ribosome[GO:0003735]	ribosome[GO:0005840]	NA
TR28468|c0_g8_i1	73.8704	21.4429	-1.78449	0.0245475	0.742846	No	hypothetical protein MIMGU_mgv1a016899mg	Mimulus guttatus	NA	NA	NA	NA	NA
TR32888|c0_g9_i4	73.8704	21.4429	-1.78449	0.0245475	0.741661	No	PREDICTED: ras-related protein RABC1	Nicotiana tomentosiformis	NA	NA	NA	NA	NA
TR39846|c0_g4_i8	73.8704	21.4429	-1.78449	0.0245475	0.74245	No	PREDICTED: dihydroflavonol-4-reductase-like	Sesamum indicum	NA	NA	NA	NA	NA
TR41710|c0_g3_i9	73.8704	21.4429	-1.78449	0.0245475	0.742055	No	PREDICTED: GTP cyclohydrolase 1-like	Sesamum indicum	NA	NA	NA	NA	NA
TR38673|c1_g1_i7	147.741	42.8859	-1.78449	0.0209092	0.712883	No	PREDICTED: uncharacterized protein LOC105159671 isoform X2	Sesamum indicum	NA	NA	NA	NA	NA
TR41287|c1_g4_i2	227.767	66.2782	-1.78095	0.0162424	0.666126	No	PREDICTED: histidinol dehydrogenase, chloroplastic isoform X3	Erythranthe guttatus	NA	NA	NA	NA	NA
TR38905|c1_g2_i3	354.989	103.316	-1.78071	0.012443	0.602536	No	basic helix-loop-helix transcription factor	Salvia miltiorrhiza	NA	NA	protein dimerization activity[GO:0046983]	NA	NA
TR37808|c0_g1_i3	127.221	37.0378	-1.78027	0.0228828	0.724912	No	PREDICTED: GTP-binding protein At2g22870	Nelumbo nucifera	NA	NA	NA	NA	NA
TR35050|c0_g2_i2	716.133	208.581	-1.77962	0.0100732	0.548579	No	NA	NA	NA	NA	NA	NA	NA
TR37794|c1_g2_i8	153.897	44.8353	-1.77926	0.0207873	0.710431	No	PREDICTED: pollen-specific leucine-rich repeat extensin-like protein 1	Erythranthe guttatus	NA	NA	NA	NA	NA
TR34019|c0_g2_i2	387.82	113.063	-1.77826	0.012012	0.599031	No	hypothetical protein MIMGU_mgv1a015513mg	Mimulus guttatus	NA	electron transport chain[GO:0022900]	metal ion binding[GO:0046872] ; electron carrier activity[GO:0009055] ; 2 iron, 2 sulfur cluster binding[GO:0051537]	NA	NA
TR35055|c0_g2_i4	28996.2	8460.22	-1.7771	0.271251	1.15914	No	PREDICTED: thiamine thiazole synthase 1, chloroplastic	Eucalyptus grandis	NA	NA	NA	NA	NA
TR2979|c0_g2_i1	654.574	191.037	-1.7767	0.0102358	0.554248	No	PREDICTED: non-specific lipid-transfer protein-like	Sesamum indicum	NA	NA	NA	NA	NA
TR2643|c0_g1_i2	367.3	107.215	-1.77646	0.012422	0.602031	No	hypothetical protein MIMGU_mgv1a013443mg	Mimulus guttatus	NA	NA	NA	NA	NA
TR35318|c1_g1_i4	2476.71	723.212	-1.77594	0.0198861	0.69898	No	NA	NA	NA	NA	NA	NA	NA
TR20401|c0_g2_i1	80.0263	23.3923	-1.77444	0.0254778	0.751774	No	NA	NA	NA	NA	NA	NA	NA
TR40380|c0_g4_i1	80.0263	23.3923	-1.77444	0.0254778	0.752165	No	PREDICTED: probable receptor-like protein kinase At5g24010	Sesamum indicum	NA	NA	NA	NA	NA
TR36341|c1_g2_i4	106.702	31.1897	-1.77444	0.0248971	0.746662	No	hypothetical protein MIMGU_mgv1a004750mg	Mimulus guttatus	NA	transport[GO:0006810]	transporter activity[GO:0005215]	integral component of membrane[GO:0016021]	NA
TR39548|c0_g3_i1	106.702	31.1897	-1.77444	0.0248971	0.746268	No	PREDICTED: uncharacterized protein LOC105169457	Sesamum indicum	NA	NA	NA	NA	NA
TR39093|c0_g5_i3	53.3509	15.5949	-1.77444	0.02075	0.710869	No	PREDICTED: crocetin glucosyltransferase, chloroplastic-like	Sesamum indicum	NA	NA	NA	NA	NA
TR38657|c0_g9_i5	213.403	62.3795	-1.77444	0.0173777	0.676077	No	hypothetical protein MIMGU_mgv1a026814mg	Mimulus guttatus	NA	metabolic process[GO:0008152]	transferase activity, transferring hexosyl groups[GO:0016758]	NA	NA
TR44075|c1_g4_i1	213.403	62.3795	-1.77444	0.0173777	0.675615	No	PREDICTED: probable glucuronoxylan glucuronosyltransferase IRX7	Sesamum indicum	NA	NA	NA	NA	NA
TR43857|c0_g1_i1	266.754	77.9744	-1.77444	0.014882	0.652751	No	hypothetical protein MIMGU_mgv1a001986mg	Mimulus guttatus	NA	metabolic process[GO:0008152]	uridylyltransferase activity[GO:0070569]	NA	NA
TR42930|c0_g1_i4	246.235	72.1263	-1.77144	0.0158741	0.663965	No	PREDICTED: auxin response factor 1-like	Sesamum indicum	NA	NA	NA	NA	NA
TR36981|c1_g1_i1	139.533	40.9365	-1.76915	0.0226076	0.72509	No	deficiens	Salvia coccinea	Lamiaceae	regulation of transcription, DNA-templated[GO:0006355] ; transcription, DNA-templated[GO:0006351]	transcription factor activity, sequence-specific DNA binding[GO:0003700] ; DNA binding[GO:0003677] ; protein dimerization activity[GO:0046983]	nucleus[GO:0005634]	NA
TR3686|c1_g1_i2	279.066	81.8731	-1.76915	0.0147291	0.65006	No	Ascorbate peroxidase	Medicago truncatula	NA	response to stimulus[GO:0050896]	NA	vacuole[GO:0005773] ; chloroplast[GO:0009507] ; membrane[GO:0016020] ; intracellular organelle part[GO:0044446]	NA
TR30667|c3_g1_i6	478.106	140.354	-1.76826	0.0113737	0.581491	No	PREDICTED: myb-related protein Myb4-like	Sesamum indicum	NA	NA	NA	NA	NA
TR32950|c1_g4_i3	3525.26	1035.11	-1.76795	0.029057	0.788189	No	galactinol synthase	Salvia miltiorrhiza	NA	metabolic process[GO:0008152]	transferase activity, transferring glycosyl groups[GO:0016757]	NA	NA
TR31786|c1_g3_i2	112.858	33.1391	-1.7679	0.0249595	0.746564	No	hypothetical protein B456_001G108200	Gossypium raimondii	NA	translation[GO:0006412]	structural constituent of ribosome[GO:0003735]	ribosome[GO:0005840]	NA
TR35195|c0_g4_i3	112.858	33.1391	-1.7679	0.0249595	0.746171	No	PREDICTED: uncharacterized protein LOC105967110	Erythranthe guttatus	NA	NA	NA	NA	NA
TR32035|c0_g2_i2	876.186	257.315	-1.7677	0.0107336	0.566618	No	transferase, putative	Ricinus communis	NA	NA	transferase activity, transferring acyl groups other than amino-acyl groups[GO:0016747]	NA	NA
TR31797|c0_g2_i1	86.1822	25.3417	-1.76588	0.0261408	0.751809	No	hypothetical protein MIMGU_mgv1a013195mg	Mimulus guttatus	NA	NA	NA	integral component of membrane[GO:0016021]	NA
TR31047|c0_g3_i2	145.689	42.8859	-1.76432	0.0224304	0.721854	No	PREDICTED: protein TIC 20-II, chloroplastic	Sesamum indicum	NA	NA	NA	NA	NA
TR41286|c1_g1_i1	1323.51	389.872	-1.7633	0.0126918	0.605807	No	unnamed protein product	Coffea canephora	NA	NA	kinase activity[GO:0016301]	NA	NA
TR44439|c0_g2_i1	7001.28	2062.42	-1.76328	0.0622739	0.94578	No	PREDICTED: alpha-glucan water dikinase, chloroplastic-like	Sesamum indicum	NA	NA	NA	NA	NA
TR37543|c0_g1_i5	119.013	35.0885	-1.76206	0.0249014	0.746006	No	PREDICTED: chaperone protein dnaJ 6 isoform X2	Sesamum indicum	NA	NA	NA	NA	NA
TR35838|c1_g5_i7	59.5067	17.5442	-1.76206	0.0240803	0.736159	No	PREDICTED: uncharacterized protein LOC105170041	Sesamum indicum	NA	NA	NA	NA	NA
TR39948|c0_g10_i1	59.5067	17.5442	-1.76206	0.0240803	0.734183	No	hypothetical protein MIMGU_mgv1a011129mg	Mimulus guttatus	NA	regulation of transcription, DNA-templated[GO:0006355] ; transcription, DNA-templated[GO:0006351]	DNA binding[GO:0003677]	nucleus[GO:0005634]	NA
TR42454|c1_g1_i1	59.5067	17.5442	-1.76206	0.0240803	0.735367	No	PREDICTED: sulfite reductase 1 [ferredoxin], chloroplastic-like	Sesamum indicum	NA	NA	NA	NA	NA
TR42591|c0_g2_i3	59.5067	17.5442	-1.76206	0.0240803	0.734972	No	PREDICTED: dnaJ protein ERDJ3A	Sesamum indicum	NA	NA	NA	NA	NA
TR43014|c2_g1_i1	59.5067	17.5442	-1.76206	0.0240803	0.734578	No	putative adenosylhomocysteinase	Trifolium pratense	NA	one-carbon metabolic process[GO:0006730]	adenosylhomocysteinase activity[GO:0004013]	NA	map00270:Cysteine and methionine metabolism(S-adenosylhomocysteine synthase[ec:3.3.1.1])
TR44231|c0_g1_i2	59.5067	17.5442	-1.76206	0.0240803	0.735763	No	PREDICTED: ABC transporter B family member 1-like	Sesamum indicum	NA	NA	NA	NA	NA
TR38704|c1_g4_i3	357.04	105.265	-1.76206	0.0132768	0.621198	No	NA	NA	NA	NA	NA	NA	NA
TR24798|c0_g1_i3	1672.34	493.188	-1.76166	0.0148787	0.653113	No	PREDICTED: auxin-binding protein ABP19a	Sesamum indicum	NA	NA	NA	NA	NA
TR30137|c0_g2_i2	687.405	202.733	-1.76158	0.0108234	0.569238	No	PREDICTED: photosystem I reaction center subunit psaK, chloroplastic	Sesamum indicum	NA	NA	NA	NA	NA
TR35020|c0_g3_i4	151.845	44.8353	-1.75989	0.0222443	0.726565	No	PREDICTED: peptidyl-prolyl cis-trans isomerase FKBP18, chloroplastic	Sesamum indicum	NA	NA	NA	NA	NA
TR3795|c0_g1_i1	547.872	161.797	-1.75966	0.0112632	0.578448	No	hypothetical protein MIMGU_mgv1a000496mg	Mimulus guttatus	NA	intracellular protein transport[GO:0006886]	Ran GTPase binding[GO:0008536]	intracellular[GO:0005622]	NA
TR7601|c0_g1_i2	884.393	261.214	-1.75946	0.0111055	0.576603	No	flavone 8-hydroxylase	Ocimum basilicum	Lamiaceae	oxidation-reduction process[GO:0055114]	metal ion binding[GO:0046872] ; 2 iron, 2 sulfur cluster binding[GO:0051537] ; chlorophyllide a oxygenase [overall] activity[GO:0010277]	NA	map00860:Porphyrin and chlorophyll metabolism(oxygenase[ec:1.14.13.122])
TR36951|c0_g1_i4	244.183	72.1263	-1.75936	0.0166323	0.667184	No	PREDICTED: uncharacterized protein LOC105169569	Sesamum indicum	NA	NA	NA	NA	NA
TR38505|c0_g3_i8	244.183	72.1263	-1.75936	0.0166323	0.666714	No	NA	NA	NA	NA	NA	NA	NA
TR36830|c1_g1_i3	732.549	216.379	-1.75936	0.0109064	0.572548	No	PREDICTED: pectinesterase 1-like	Sesamum indicum	NA	NA	NA	NA	NA
TR35372|c0_g1_i5	92.3381	27.291	-1.7585	0.0266742	0.75794	No	hypothetical protein MIMGU_mgv1a009964mg	Mimulus guttatus	NA	formation of translation preinitiation complex[GO:0001731] ; regulation of translational initiation[GO:0006446]	translation initiation factor activity[GO:0003743]	eukaryotic 43S preinitiation complex[GO:0016282] ; eukaryotic translation initiation factor 3 complex[GO:0005852] ; eukaryotic 48S preinitiation complex[GO:0033290]	NA
TR40311|c1_g4_i1	125.169	37.0378	-1.75681	0.0247586	0.743687	No	cytochrome P450 CYP96A85	Salvia miltiorrhiza	NA	NA	metal ion binding[GO:0046872] ; oxidoreductase activity[GO:0016491]	NA	NA
TR40546|c0_g1_i6	125.169	37.0378	-1.75681	0.0247586	0.744081	No	PREDICTED: MATE efflux family protein 2, chloroplastic	Sesamum indicum	NA	NA	NA	NA	NA
TR44165|c1_g5_i1	125.169	37.0378	-1.75681	0.0247586	0.744474	No	PREDICTED: chaperone protein ClpC, chloroplastic	Malus domestica	NA	NA	NA	NA	NA
TR32272|c0_g2_i2	190.832	56.5314	-1.75518	0.0199263	0.698663	No	PREDICTED: WW domain-containing protein C11B10.08	Sesamum indicum	NA	NA	NA	NA	NA
TR31833|c1_g1_i1	223.663	66.2782	-1.75472	0.0179526	0.683461	No	NA	NA	NA	NA	NA	NA	NA
TR39705|c0_g2_i3	354.989	105.265	-1.75374	0.0137214	0.629557	No	PREDICTED: allene oxide synthase, chloroplastic	Sesamum indicum	NA	NA	NA	NA	NA
TR39132|c1_g1_i3	98.4939	29.2404	-1.75207	0.0270616	0.763601	No	NA	NA	NA	NA	NA	NA	NA
TR30365|c0_g1_i2	65.6626	19.4936	-1.75207	0.0262722	0.752919	No	hypothetical protein POPTR_0001s28440g	Populus trichocarpa	NA	mRNA splicing, via spliceosome[GO:0000398]	NA	U2 snRNP[GO:0005686] ; precatalytic spliceosome[GO:0071011] ; U12-type spliceosomal complex[GO:0005689] ; catalytic step 2 spliceosome[GO:0071013]	NA
TR33206|c0_g1_i1	65.6626	19.4936	-1.75207	0.0262722	0.753299	No	NA	NA	NA	NA	NA	NA	NA
TR37727|c1_g2_i1	65.6626	19.4936	-1.75207	0.0262722	0.752539	No	PREDICTED: probable protein phosphatase 2C 63	Sesamum indicum	NA	NA	NA	NA	NA
TR44460|c1_g5_i1	131.325	38.9872	-1.75207	0.0245589	0.740822	No	NA	NA	NA	NA	NA	NA	NA
TR7359|c0_g2_i2	131.325	38.9872	-1.75207	0.0245589	0.741215	No	PREDICTED: stress enhanced protein 1, chloroplastic	Sesamum indicum	NA	NA	NA	NA	NA
TR30975|c0_g1_i3	164.157	48.734	-1.75207	0.0218797	0.724657	No	NA	NA	NA	NA	NA	NA	NA
TR34386|c0_g5_i1	164.157	48.734	-1.75207	0.0218797	0.725503	No	NA	NA	NA	NA	NA	NA	NA
TR42317|c0_g7_i2	164.157	48.734	-1.75207	0.0218797	0.72508	No	PREDICTED: probable anion transporter 2, chloroplastic	Sesamum indicum	NA	NA	NA	NA	NA
TR7456|c0_g1_i2	492.47	146.202	-1.75207	0.0119641	0.597165	No	flowering locus T2	Helianthus annuus	NA	photoperiodism, flowering[GO:0048573] ; regulation of flower development[GO:0009909]	phosphatidylethanolamine binding[GO:0008429]	NA	NA
TR38334|c0_g2_i2	32.8313	9.74679	-1.75207	0.00717755	0.480202	No	hypothetical protein MIMGU_mgv1a010099mg	Mimulus guttatus	NA	NA	NA	NA	NA
TR39026|c0_g1_i6	531.457	157.898	-1.75096	0.011736	0.592548	No	PREDICTED: uncharacterized protein LOC105174419	Sesamum indicum	NA	NA	NA	NA	NA
TR38798|c0_g1_i1	203.144	60.4301	-1.74916	0.0195177	0.694627	No	hypothetical protein MIMGU_mgv1a004614mg	Mimulus guttatus	NA	metabolic process[GO:0008152]	hydrolase activity, acting on ester bonds[GO:0016788]	NA	NA
TR37183|c0_g1_i1	379.612	113.063	-1.7474	0.0135894	0.626025	No	PREDICTED: putative amidase C869.01-like isoform X2	Citrus sinensis	NA	NA	NA	NA	NA
TR43412|c0_g1_i1	346.781	103.316	-1.74696	0.014224	0.639191	No	PREDICTED: phosphomethylpyrimidine synthase, chloroplastic isoform X1	Sesamum indicum	NA	NA	NA	NA	NA
TR2510|c0_g3_i1	104.65	31.1897	-1.74643	0.0272116	0.76593	No	PREDICTED: putative NAC domain-containing protein 94	Sesamum indicum	NA	NA	NA	NA	NA
TR33825|c0_g1_i3	104.65	31.1897	-1.74643	0.0272116	0.765551	No	hypothetical protein MIMGU_mgv1a009284mg	Mimulus guttatus	NA	NA	NA	membrane[GO:0016020]	NA
TR35130|c0_g2_i3	104.65	31.1897	-1.74643	0.0272116	0.765172	No	PREDICTED: red chlorophyll catabolite reductase-like	Sesamum indicum	NA	NA	NA	NA	NA
TR34485|c0_g4_i1	209.3	62.3795	-1.74643	0.0193048	0.696211	No	PREDICTED: HMG-Y-related protein A-like	Sesamum indicum	NA	NA	NA	NA	NA
TR35041|c0_g9_i4	888.497	265.113	-1.74476	0.0117729	0.591781	No	PREDICTED: probable ribose-5-phosphate isomerase 3, chloroplastic	Sesamum indicum	NA	NA	NA	NA	NA
TR24164|c0_g1_i1	71.8185	21.4429	-1.74385	0.0276468	0.76941	No	hypothetical protein MIMGU_mgv1a006210mg	Mimulus guttatus	NA	vesicle-mediated transport[GO:0016192] ; intracellular protein transport[GO:0006886]	NA	clathrin adaptor complex[GO:0030131]	NA
TR35865|c0_g2_i1	71.8185	21.4429	-1.74385	0.0276468	0.769787	No	PREDICTED: IAA-amino acid hydrolase ILR1-like 4-like	Solanum tuberosum	NA	NA	NA	NA	NA
TR7708|c3_g10_i2	143.637	42.8859	-1.74385	0.0240704	0.736255	No	hypothetical protein MIMGU_mgv1a011200mg	Mimulus guttatus	NA	metabolic process[GO:0008152]	amino acid binding[GO:0016597]	NA	NA
TR38942|c1_g1_i8	215.455	64.3288	-1.74385	0.0190906	0.693773	No	cytochrome P450 CYP714G13	Salvia miltiorrhiza	NA	oxidation-reduction process[GO:0055114]	heme binding[GO:0020037] ; oxidoreductase activity, acting on paired donors, with incorporation or reduction of molecular oxygen[GO:0016705] ; monooxygenase activity[GO:0004497] ; iron ion binding[GO:0005506]	integral component of membrane[GO:0016021]	NA
TR33606|c1_g5_i1	646.366	192.987	-1.74385	0.0116448	0.588466	No	unknown	Medicago truncatula	NA	NA	NA	NA	NA
TR30798|c0_g7_i3	1768.79	528.276	-1.7434	0.0166207	0.667191	No	PREDICTED: ruBisCO large subunit-binding protein subunit beta, chloroplastic	Sesamum indicum	NA	NA	NA	NA	NA
TR28770|c0_g1_i2	110.806	33.1391	-1.74143	0.0271861	0.765591	No	PREDICTED: uncharacterized protein LOC105169903	Sesamum indicum	NA	NA	NA	NA	NA
TR40086|c0_g5_i1	110.806	33.1391	-1.74143	0.0271861	0.76597	No	PREDICTED: ribulose-1,5 bisphosphate carboxylase/oxygenase large subunit N-methyltransferase, chloroplastic isoform X2	Sesamum indicum	NA	NA	NA	NA	NA
TR36690|c0_g1_i2	4058.77	1214.45	-1.74074	0.0365621	0.8425	No	PREDICTED: probable carotenoid cleavage dioxygenase 4, chloroplastic isoform X1	Erythranthe guttatus	NA	NA	NA	NA	NA
TR38459|c0_g2_i1	761.276	228.075	-1.73891	0.0118265	0.591855	No	PREDICTED: uncharacterized protein LOC105165277 isoform X2	Sesamum indicum	NA	NA	NA	NA	NA
TR35239|c0_g1_i1	461.69	138.404	-1.73803	0.012911	0.613175	No	hypothetical protein MIMGU_mgv1a009493mg	Mimulus guttatus	NA	menaquinone biosynthetic process[GO:0009234]	1,4-dihydroxy-2-naphthoyl-CoA synthase activity[GO:0008935]	NA	map00130:Ubiquinone and other terpenoid-quinone biosynthesis(synthase[ec:4.1.3.36])
TR37991|c0_g1_i2	2567	769.997	-1.73716	0.0234778	0.73152	No	malate dehydrogenase	Perilla frutescens	Lamiaceae	carbohydrate metabolic process[GO:0005975] ; malate metabolic process[GO:0006108] ; tricarboxylic acid cycle[GO:0006099]	L-malate dehydrogenase activity[GO:0030060]	NA	map00630:Glyoxylate and dicarboxylate metabolism(dehydrogenase[ec:1.1.1.37]) ; map01130:Biosynthesis of antibiotics(dehydrogenase[ec:1.1.1.37]) ; map00720:Carbon fixation pathways in prokaryotes(dehydrogenase[ec:1.1.1.37]) ; map00020:Citrate cycle (TCA cycle)(dehydrogenase[ec:1.1.1.37]) ; map00620:Pyruvate metabolism(dehydrogenase[ec:1.1.1.37]) ; map00270:Cysteine and methionine metabolism(dehydr…
TR38320|c1_g1_i2	77.9744	23.3923	-1.73697	0.0284909	0.786352	No	hypothetical protein EUGRSUZ_L01630	Eucalyptus grandis	NA	metabolic process[GO:0008152]	transferase activity, transferring glycosyl groups[GO:0016757]	integral component of membrane[GO:0016021]	NA
TR40182|c1_g2_i11	116.962	35.0885	-1.73697	0.0270352	0.763612	No	PREDICTED: uncharacterized protein LOC105160499	Sesamum indicum	NA	NA	NA	NA	NA
TR32931|c2_g1_i3	272.91	81.8731	-1.73697	0.0166913	0.668603	No	PREDICTED: UDP-glycosyltransferase 83A1-like	Sesamum indicum	NA	NA	NA	NA	NA
TR44446|c1_g2_i2	38.9872	11.6962	-1.73697	0.0129761	0.614212	No	PREDICTED: pentatricopeptide repeat-containing protein At1g08070 isoform X1	Sesamum indicum	NA	NA	NA	NA	NA
TR30938|c0_g3_i1	629.951	189.088	-1.73618	0.0120268	0.598715	No	PREDICTED: uncharacterized protein LOC105172976	Sesamum indicum	NA	NA	NA	NA	NA
TR38508|c0_g2_i1	318.053	95.5186	-1.73542	0.0154632	0.662389	No	PREDICTED: potassium channel SKOR-like	Erythranthe guttatus	NA	NA	NA	NA	NA
TR2416|c0_g1_i1	279.066	83.8224	-1.7352	0.0165699	0.668455	No	PREDICTED: uncharacterized protein LOC105167802	Sesamum indicum	NA	NA	NA	NA	NA
TR3439|c0_g2_i5	441.171	132.556	-1.73473	0.0133087	0.619123	No	PREDICTED: uncharacterized protein LOC105966158	Erythranthe guttatus	NA	NA	NA	NA	NA
TR39216|c2_g1_i7	123.117	37.0378	-1.73296	0.026798	0.760318	No	PREDICTED: ATP-dependent zinc metalloprotease FTSH 7, chloroplastic-like	Sesamum indicum	NA	NA	NA	NA	NA
TR41674|c0_g2_i1	207.248	62.3795	-1.73221	0.0203511	0.704426	No	plastidic ATP/ADP-transporter	Solanum tuberosum	NA	ATP transport[GO:0015867] ; ADP transport[GO:0015866]	ATP:ADP antiporter activity[GO:0005471] ; ATP binding[GO:0005524]	integral component of membrane[GO:0016021] ; chloroplast membrane[GO:0031969]	NA
TR32409|c0_g1_i3	291.378	87.7211	-1.73189	0.0163558	0.665013	No	hypothetical protein MIMGU_mgv1a015205mg	Mimulus guttatus	NA	NA	NA	NA	NA
TR42149|c0_g2_i1	459.638	138.404	-1.73161	0.0132464	0.620288	No	PREDICTED: G-type lectin S-receptor-like serine/threonine-protein kinase At4g27290 isoform X2	Sesamum indicum	NA	NA	NA	NA	NA
TR36024|c0_g4_i2	84.1302	25.3417	-1.73111	0.0290263	0.788109	No	hypothetical protein M569_00528	Genlisea aurea	NA	NA	NA	integral component of membrane[GO:0016021]	NA
TR38293|c0_g1_i3	84.1302	25.3417	-1.73111	0.0290263	0.787732	No	PREDICTED: uncharacterized protein LOC105178178	Sesamum indicum	NA	NA	NA	NA	NA
TR35000|c0_g1_i6	168.26	50.6833	-1.73111	0.0230839	0.730467	No	NA	NA	NA	NA	NA	NA	NA
TR7878|c0_g7_i1	381.664	115.012	-1.73052	0.0144119	0.641546	No	PREDICTED: protein EARLY RESPONSIVE TO DEHYDRATION 15	Sesamum indicum	NA	NA	NA	NA	NA
TR40255|c1_g3_i1	213.403	64.3288	-1.73005	0.0201008	0.701748	No	hypothetical protein MIMGU_mgv1a012535mg	Mimulus guttatus	NA	methylation[GO:0032259]	O-methyltransferase activity[GO:0008171]	NA	NA
TR35250|c1_g3_i2	129.273	38.9872	-1.72935	0.0265051	0.75616	No	PREDICTED: glutathione S-transferase F9-like	Sesamum indicum	NA	NA	NA	NA	NA
TR35055|c0_g2_i2	1175.77	354.783	-1.7286	0.0136803	0.628177	No	PREDICTED: thiamine thiazole synthase 1, chloroplastic	Eucalyptus grandis	NA	NA	NA	NA	NA
TR2648|c0_g3_i1	174.416	52.6327	-1.7285	0.0228519	0.724337	No	PREDICTED: uncharacterized protein LOC105157188	Sesamum indicum	NA	NA	NA	NA	NA
TR25805|c0_g1_i1	90.2861	27.291	-1.72608	0.0294139	0.788829	No	unknown	Populus trichocarpa	NA	methionine biosynthetic process[GO:0009086] ; methylation[GO:0032259]	zinc ion binding[GO:0008270] ; 5-methyltetrahydropteroyltriglutamate-homocysteine S-methyltransferase activity[GO:0003871]	NA	map00450:Selenocompound metabolism(S-methyltransferase[ec:2.1.1.14]) ; map00270:Cysteine and methionine metabolism(S-methyltransferase[ec:2.1.1.14])
TR34401|c0_g5_i3	135.429	40.9365	-1.72608	0.0261794	0.751779	No	hypothetical protein MIMGU_mgv1a012780mg	Mimulus guttatus	NA	NA	NA	NA	NA
TR44240|c3_g4_i4	45.143	13.6455	-1.72608	0.0188095	0.691969	No	PREDICTED: F-box protein At5g03100-like	Nicotiana tomentosiformis	NA	NA	NA	NA	NA
TR41672|c0_g2_i1	45.143	13.6455	-1.72608	0.0188095	0.691521	No	NA	NA	NA	NA	NA	NA	NA
TR35296|c0_g8_i7	3067.68	927.895	-1.72511	0.0289334	0.786714	No	PREDICTED: aquaporin TIP1-1-like	Sesamum indicum	NA	NA	NA	NA	NA
TR3622|c1_g1_i4	186.728	56.5314	-1.72381	0.0223223	0.72619	No	unnamed protein product	Coffea canephora	NA	NA	NA	integral component of membrane[GO:0016021]	NA
TR3986|c0_g3_i16	328.313	99.4173	-1.7235	0.0158833	0.663373	No	PREDICTED: short-chain dehydrogenase TIC 32, chloroplastic-like isoform X2	Erythranthe guttatus	NA	NA	NA	NA	NA
TR37991|c0_g1_i6	283.17	85.7718	-1.72309	0.0171317	0.67064	No	NA	NA	NA	NA	NA	NA	NA
TR32885|c0_g7_i1	96.442	29.2404	-1.7217	0.0297029	0.791348	No	hypothetical protein MIMGU_mgv1a017542mg	Mimulus guttatus	NA	NA	NA	NA	NA
TR35020|c0_g3_i1	96.442	29.2404	-1.7217	0.0297029	0.791719	No	PREDICTED: peptidyl-prolyl cis-trans isomerase FKBP18, chloroplastic	Sesamum indicum	NA	NA	NA	NA	NA
TR40796|c0_g5_i1	726.393	220.278	-1.72143	0.0126378	0.604242	No	NA	NA	NA	NA	NA	NA	NA
TR44353|c0_g4_i2	147.741	44.8353	-1.72036	0.0254967	0.751941	No	PREDICTED: 21 kDa protein	Sesamum indicum	NA	NA	NA	NA	NA
TR7851|c0_g2_i3	301.638	91.6199	-1.71908	0.0167998	0.670586	No	hypothetical protein MIMGU_mgv1a022002mg	Mimulus guttatus	NA	NA	nucleic acid binding[GO:0003676] ; nucleotide binding[GO:0000166]	integral component of membrane[GO:0016021]	NA
TR37645|c0_g1_i3	352.937	107.215	-1.71891	0.0155941	0.662993	No	PREDICTED: myb-related protein 3R-1 isoform X1	Sesamum indicum	NA	NA	NA	NA	NA
TR36250|c0_g1_i4	1674.4	508.783	-1.71852	0.0174695	0.675482	No	PREDICTED: putative ion channel POLLUX-like 2 isoform X2	Sesamum indicum	NA	NA	NA	NA	NA
TR34479|c0_g1_i1	102.598	31.1897	-1.71786	0.0297558	0.791642	No	PREDICTED: 3-ketoacyl-CoA synthase 6-like	Sesamum indicum	NA	NA	NA	NA	NA
TR43239|c1_g4_i5	153.897	46.7846	-1.71786	0.0251629	0.748314	No	cellulase, partial	Populus trichocarpa	NA	cellulose catabolic process[GO:0030245]	cellulase activity[GO:0008810]	NA	map00500:Starch and sucrose metabolism(endo-1,4-beta-D-glucanase[ec:3.2.1.4])
TR25782|c0_g1_i3	51.2989	15.5949	-1.71786	0.0238703	0.735281	No	NA	NA	NA	NA	NA	NA	NA
TR34258|c1_g2_i1	51.2989	15.5949	-1.71786	0.0238703	0.734883	No	NADP-dependent isocitrate dehydrogenase family protein	Populus trichocarpa	NA	tricarboxylic acid cycle[GO:0006099] ; isocitrate metabolic process[GO:0006102]	NAD binding[GO:0051287] ; isocitrate dehydrogenase (NADP+) activity[GO:0004450] ; magnesium ion binding[GO:0000287]	NA	map00480:Glutathione metabolism(dehydrogenase (NADP+)[ec:1.1.1.42]) ; map01130:Biosynthesis of antibiotics(dehydrogenase (NADP+)[ec:1.1.1.42]) ; map00720:Carbon fixation pathways in prokaryotes(dehydrogenase (NADP+)[ec:1.1.1.42]) ; map00020:Citrate cycle (TCA cycle)(dehydrogenase (NADP+)[ec:1.1.1.42])
TR37920|c0_g3_i1	51.2989	15.5949	-1.71786	0.0238703	0.734485	No	NA	NA	NA	NA	NA	NA	NA
TR39106|c1_g2_i2	51.2989	15.5949	-1.71786	0.0238703	0.734087	No	hypothetical protein MIMGU_mgv1a009055mg	Mimulus guttatus	NA	protein demethylation[GO:0006482]	carboxylic ester hydrolase activity[GO:0052689]	NA	map00983:Drug metabolism - other enzymes(ali-esterase[ec:3.1.1.1])
TR39120|c0_g2_i1	51.2989	15.5949	-1.71786	0.0238703	0.73648	No	PREDICTED: divinyl chlorophyllide a 8-vinyl-reductase, chloroplastic	Sesamum indicum	NA	NA	NA	NA	NA
TR43725|c3_g4_i3	51.2989	15.5949	-1.71786	0.0238703	0.73568	No	PREDICTED: F-box/ankyrin repeat protein SKIP35-like isoform X1	Solanum tuberosum	NA	NA	NA	NA	NA
TR40777|c4_g13_i6	51.2989	15.5949	-1.71786	0.0238703	0.73608	No	NA	NA	NA	NA	NA	NA	NA
TR43010|c0_g2_i1	205.196	62.3795	-1.71786	0.0214569	0.719889	No	PREDICTED: probable leucine-rich repeat receptor-like protein kinase At1g68400	Sesamum indicum	NA	NA	NA	NA	NA
TR31880|c4_g3_i4	5737.27	1744.68	-1.71741	0.0562248	0.925956	No	PREDICTED: peroxisomal membrane protein 11C	Sesamum indicum	NA	NA	NA	NA	NA
TR7912|c0_g1_i7	1666.19	506.833	-1.71697	0.0175067	0.676002	No	NA	NA	NA	NA	NA	NA	NA
TR2756|c4_g4_i2	211.352	64.3288	-1.71611	0.0211671	0.714385	No	hypothetical protein MIMGU_mgv1a016641mg	Mimulus guttatus	NA	translational initiation[GO:0006413]	translation initiation factor activity[GO:0003743]	NA	NA
TR7972|c2_g5_i2	377.56	115.012	-1.71492	0.0153242	0.658918	No	NA	NA	NA	NA	NA	NA	NA
TR8274|c0_g1_i4	108.754	33.1391	-1.71446	0.0296241	0.791849	No	PREDICTED: cold-regulated 413 plasma membrane protein 2-like	Sesamum indicum	NA	NA	NA	NA	NA
TR34389|c0_g1_i7	217.507	66.2782	-1.71446	0.0208816	0.71237	No	PREDICTED: 1-aminocyclopropane-1-carboxylate oxidase homolog 1-like	Sesamum indicum	NA	NA	NA	NA	NA
TR2167|c0_g1_i4	166.208	50.6833	-1.71341	0.0245481	0.741285	No	NA	NA	NA	NA	NA	NA	NA
TR2390|c0_g1_i4	223.663	68.2276	-1.7129	0.0206026	0.706673	No	PREDICTED: uncharacterized protein LOC104089428	Nicotiana tomentosiformis	NA	NA	NA	NA	NA
TR31912|c1_g1_i1	670.99	204.683	-1.7129	0.0130827	0.616178	No	hypothetical protein POPTR_0018s01830g	Populus trichocarpa	NA	ATP synthesis coupled proton transport[GO:0015986]	hydrogen ion transmembrane transporter activity[GO:0015078]	integral component of membrane[GO:0016021] ; proton-transporting ATP synthase complex, coupling factor F(o)[GO:0045263]	NA
TR36995|c0_g1_i1	338.573	103.316	-1.7124	0.0162784	0.664723	No	NA	NA	NA	NA	NA	NA	NA
TR33799|c0_g4_i3	114.91	35.0885	-1.71143	0.0293633	0.78971	No	hypothetical protein MIMGU_mgv1a009899mg	Mimulus guttatus	NA	NA	NA	NA	NA
TR29772|c0_g1_i1	57.4548	17.5442	-1.71143	0.0275408	0.769854	No	hypothetical protein MIMGU_mgv1a024165mg, partial	Mimulus guttatus	NA	hydrogen ion transmembrane transport[GO:1902600] ; mitochondrial electron transport, ubiquinol to cytochrome c[GO:0006122]	ubiquinol-cytochrome-c reductase activity[GO:0008121]	mitochondrion[GO:0005739]	map00190:Oxidative phosphorylation(reductase[ec:1.10.2.2])
TR41009|c0_g4_i3	57.4548	17.5442	-1.71143	0.0275408	0.769476	No	PREDICTED: uncharacterized protein LOC105175670 isoform X1	Sesamum indicum	NA	NA	NA	NA	NA
TR8050|c1_g2_i1	57.4548	17.5442	-1.71143	0.0275408	0.769097	No	PREDICTED: LOW QUALITY PROTEIN: transmembrane 9 superfamily member 12-like	Sesamum indicum	NA	NA	NA	NA	NA
TR42225|c1_g1_i5	344.729	105.265	-1.71143	0.0161952	0.664668	No	PREDICTED: cellulose synthase-like protein G3	Sesamum indicum	NA	NA	NA	NA	NA
TR44584|c0_g3_i1	235.975	72.1263	-1.71004	0.0200707	0.701559	No	PREDICTED: SUMO-activating enzyme subunit 2	Sesamum indicum	NA	NA	NA	NA	NA
TR37131|c0_g7_i1	3861.78	1181.31	-1.70888	0.0381878	0.843681	No	putative glyceraldehyde-3-phosphate dehydrogenase	Medicago sativa	NA	glucose metabolic process[GO:0006006] ; oxidation-reduction process[GO:0055114]	NAD binding[GO:0051287] ; oxidoreductase activity, acting on the aldehyde or oxo group of donors, NAD or NADP as acceptor[GO:0016620] ; NADP binding[GO:0050661]	NA	NA
TR40863|c0_g1_i8	121.065	37.0378	-1.70872	0.0290163	0.788212	No	quercetin 3-O-glucoside-6''-O-malonyltransferase	Lamium purpureum	Lamiaceae	NA	transferase activity[GO:0016740]	NA	NA
TR32239|c0_g2_i2	242.131	74.0756	-1.70872	0.01982	0.69752	No	PREDICTED: small heat shock protein, chloroplastic-like	Sesamum indicum	NA	NA	NA	NA	NA
TR43798|c0_g2_i1	242.131	74.0756	-1.70872	0.01982	0.697953	No	PREDICTED: uncharacterized protein LOC105179467 isoform X2	Sesamum indicum	NA	NA	NA	NA	NA
TR38432|c0_g3_i2	311.897	95.5186	-1.70722	0.017236	0.672407	No	PREDICTED: proliferating cell nuclear antigen	Sesamum indicum	NA	NA	NA	NA	NA
TR32164|c0_g1_i4	1813.93	555.567	-1.70709	0.019346	0.69461	No	PREDICTED: aldo-keto reductase	Sesamum indicum	NA	NA	NA	NA	NA
TR40215|c0_g14_i1	63.6107	19.4936	-1.70627	0.029843	0.791368	No	PREDICTED: probable polygalacturonase	Sesamum indicum	NA	NA	NA	NA	NA
TR41465|c0_g5_i1	63.6107	19.4936	-1.70627	0.029843	0.79063	No	hypothetical protein MIMGU_mgv1a004038mg	Mimulus guttatus	NA	NA	NA	integral component of membrane[GO:0016021]	NA
TR44168|c1_g6_i1	63.6107	19.4936	-1.70627	0.029843	0.790999	No	hypothetical protein MIMGU_mgv1a003178mg	Mimulus guttatus	NA	NA	NA	NA	NA
TR39534|c4_g1_i4	127.221	38.9872	-1.70627	0.0286155	0.785213	No	NA	NA	NA	NA	NA	NA	NA
TR39362|c0_g2_i1	318.053	97.4679	-1.70627	0.0171351	0.67031	No	unknown	Lotus japonicus	NA	pectin catabolic process[GO:0045490]	metal ion binding[GO:0046872] ; pectate lyase activity[GO:0030570]	NA	map00040:Pentose and glucuronate interconversions(lyase[ec:4.2.2.2])
TR34967|c0_g1_i2	584.808	179.341	-1.70526	0.0136779	0.628577	No	NA	NA	NA	NA	NA	NA	NA
TR30771|c1_g1_i4	266.754	81.8731	-1.70405	0.0189361	0.691253	No	PREDICTED: pleiotropic drug resistance protein 2-like, partial	Erythranthe guttatus	NA	NA	NA	NA	NA
TR7501|c0_g2_i1	266.754	81.8731	-1.70405	0.0189361	0.691698	No	PREDICTED: plastidic ATP/ADP-transporter	Sesamum indicum	NA	NA	NA	NA	NA
TR42149|c0_g2_i5	469.898	144.253	-1.70375	0.0145693	0.646523	No	PREDICTED: G-type lectin S-receptor-like serine/threonine-protein kinase At4g27290	Erythranthe guttatus	NA	NA	NA	NA	NA
TR38753|c0_g5_i11	203.144	62.3795	-1.70336	0.0226257	0.724851	No	PREDICTED: uncharacterized protein LOC105967360	Erythranthe guttatus	NA	NA	NA	NA	NA
TR43187|c2_g6_i1	203.144	62.3795	-1.70336	0.0226257	0.72526	No	PREDICTED: oligopeptide transporter 5-like	Sesamum indicum	NA	NA	NA	NA	NA
TR21011|c1_g1_i1	69.7665	21.4429	-1.70203	0.0311806	0.801398	No	hypothetical protein Csa_5G495920	Cucumis sativus	NA	NA	GTP binding[GO:0005525]	NA	NA
TR30805|c0_g1_i4	69.7665	21.4429	-1.70203	0.0311806	0.80176	No	hypothetical protein M569_13156, partial	Genlisea aurea	NA	protein ubiquitination[GO:0016567]	zinc ion binding[GO:0008270] ; ubiquitin-protein transferase activity[GO:0004842]	NA	NA
TR34411|c0_g1_i4	69.7665	21.4429	-1.70203	0.0311806	0.802123	No	NA	NA	NA	NA	NA	NA	NA
TR26032|c0_g2_i1	279.066	85.7718	-1.70203	0.0185699	0.685371	No	NA	NA	NA	NA	NA	NA	NA
TR2687|c0_g2_i1	279.066	85.7718	-1.70203	0.0185699	0.686263	No	PREDICTED: uncharacterized protein LOC105975682 isoform X1	Erythranthe guttatus	NA	NA	NA	NA	NA
TR41569|c0_g5_i1	279.066	85.7718	-1.70203	0.0185699	0.685817	No	PREDICTED: inner membrane protein PPF-1, chloroplastic isoform X2	Sesamum indicum	NA	NA	NA	NA	NA
TR40715|c0_g1_i1	215.455	66.2782	-1.70078	0.0219661	0.724983	No	PREDICTED: LOW QUALITY PROTEIN: DELLA protein GAI	Sesamum indicum	NA	NA	NA	NA	NA
TR42331|c0_g4_i9	145.689	44.8353	-1.70019	0.0273103	0.767186	No	PREDICTED: uncharacterized protein LOC105167066	Sesamum indicum	NA	NA	NA	NA	NA
TR33259|c0_g1_i6	658.678	202.733	-1.69999	0.0137609	0.630858	No	hypothetical protein MIMGU_mgv1a021873mg	Mimulus guttatus	NA	biosynthetic process[GO:0009058]	strictosidine synthase activity[GO:0016844]	NA	map00901:Indole alkaloid biosynthesis(synthase[ec:4.3.3.2])
TR2425|c0_g2_i3	1247.59	384.024	-1.69988	0.0156807	0.664189	No	chloroplast ferredoxin-thioredoxin reductase catalytic chain	Nicotiana benthamiana	NA	phosphorylation[GO:0016310] ; oxidation-reduction process[GO:0055114]	oxidoreductase activity, acting on iron-sulfur proteins as donors[GO:0016730] ; glucose-1-phosphate phosphodismutase activity[GO:0047937]	NA	map00500:Starch and sucrose metabolism(phosphodismutase[ec:2.7.1.41])
TR8143|c3_g12_i9	75.9224	23.3923	-1.69849	0.0319026	0.802523	No	PREDICTED: ethylene-responsive transcription factor 4-like	Sesamum indicum	NA	NA	NA	NA	NA
TR39195|c0_g3_i1	151.845	46.7846	-1.69849	0.0268881	0.760595	No	PREDICTED: BTB/POZ domain-containing protein At1g67900	Sesamum indicum	NA	NA	NA	NA	NA
TR38972|c1_g3_i1	227.767	70.1769	-1.69849	0.0213395	0.717221	No	PREDICTED: uncharacterized protein LOC105172351	Sesamum indicum	NA	NA	NA	NA	NA
TR42789|c0_g2_i4	385.768	118.911	-1.69785	0.0161354	0.666064	No	NA	NA	NA	NA	NA	NA	NA
TR35055|c0_g2_i3	12391.8	3820.74	-1.69746	0.132425	1.07996	No	PREDICTED: thiamine thiazole synthase 1, chloroplastic	Eucalyptus grandis	NA	NA	NA	NA	NA
TR33250|c0_g3_i2	233.923	72.1263	-1.69744	0.0210426	0.716141	No	PREDICTED: NADPH-dependent 1-acyldihydroxyacetone phosphate reductase-like	Sesamum indicum	NA	NA	NA	NA	NA
TR33357|c0_g1_i1	714.081	220.278	-1.69677	0.013893	0.633336	No	PREDICTED: aldo-keto reductase family 4 member C9-like	Sesamum indicum	NA	NA	NA	NA	NA
TR37644|c0_g2_i1	240.079	74.0756	-1.69644	0.020758	0.710713	No	hypothetical protein MIMGU_mgv1a007445mg	Mimulus guttatus	NA	glycine catabolic process[GO:0006546] ; methylation[GO:0032259]	aminomethyltransferase activity[GO:0004047] ; transaminase activity[GO:0008483]	NA	map00260:Glycine, serine and threonine metabolism(S-aminomethyldihydrolipoylprotein:(6S)-tetrahydrofolate aminomethyltransferase (ammonia-forming)[ec:2.1.2.10]) ; map00670:One carbon pool by folate(S-aminomethyldihydrolipoylprotein:(6S)-tetrahydrofolate aminomethyltransferase (ammonia-forming)[ec:2.1.2.10])
TR43738|c0_g7_i2	322.157	99.4173	-1.6962	0.0176441	0.678539	No	PREDICTED: protein translocase subunit SecA, chloroplastic isoform X1	Sesamum indicum	NA	NA	NA	NA	NA
TR32345|c1_g1_i4	82.0783	25.3417	-1.69549	0.0322724	0.805761	No	PREDICTED: translation machinery-associated protein 22 isoform X1	Sesamum indicum	NA	NA	NA	NA	NA
TR40170|c1_g3_i3	82.0783	25.3417	-1.69549	0.0322724	0.806825	No	PREDICTED: uncharacterized protein LOC105174992	Sesamum indicum	NA	NA	NA	NA	NA
TR40505|c0_g1_i2	82.0783	25.3417	-1.69549	0.0322724	0.806115	No	cytochrome P450 CYP94A48	Salvia miltiorrhiza	NA	oxidation-reduction process[GO:0055114]	heme binding[GO:0020037] ; oxidoreductase activity, acting on paired donors, with incorporation or reduction of molecular oxygen[GO:0016705] ; monooxygenase activity[GO:0004497] ; iron ion binding[GO:0005506]	NA	NA
TR7473|c0_g1_i6	82.0783	25.3417	-1.69549	0.0322724	0.80647	No	PREDICTED: MYB-like transcription factor ETC3	Sesamum indicum	NA	NA	NA	NA	NA
TR39177|c0_g1_i4	328.313	101.367	-1.69549	0.0175319	0.676054	No	PREDICTED: reticuline oxidase-like protein	Sesamum indicum	NA	NA	NA	NA	NA
TR7600|c0_g1_i1	2985.6	922.047	-1.69511	0.0310326	0.800856	No	PREDICTED: alpha-galactosidase-like	Sesamum indicum	NA	NA	NA	NA	NA
TR3643|c0_g1_i5	498.625	153.999	-1.69503	0.0147556	0.649716	No	PREDICTED: uncharacterized protein LOC105168965	Sesamum indicum	NA	NA	NA	NA	NA
TR3818|c0_g1_i4	170.312	52.6327	-1.69415	0.0257629	0.755476	No	NA	NA	NA	NA	NA	NA	NA
TR27824|c4_g8_i1	170.312	52.6327	-1.69415	0.0257629	0.755086	No	hypothetical protein MIMGU_mgv1a016596mg	Mimulus guttatus	NA	NA	NA	NA	NA
TR22846|c0_g1_i2	88.2341	27.291	-1.69291	0.0324773	0.806268	No	PREDICTED: ultraviolet-B receptor UVR8 isoform X2	Sesamum indicum	NA	NA	NA	NA	NA
TR44425|c1_g3_i6	88.2341	27.291	-1.69291	0.0324773	0.806974	No	NA	NA	NA	NA	NA	NA	NA
TR35587|c1_g4_i1	88.2341	27.291	-1.69291	0.0324773	0.806621	No	PREDICTED: LOW QUALITY PROTEIN: phenylalanine ammonia-lyase-like	Sesamum indicum	NA	NA	NA	NA	NA
TR38396|c1_g1_i1	1323.51	409.365	-1.69291	0.0165809	0.668425	No	PREDICTED: uncharacterized protein LOC105158308	Sesamum indicum	NA	NA	NA	NA	NA
TR40014|c0_g1_i8	441.171	136.455	-1.69291	0.0155223	0.661428	No	PREDICTED: protein TIC 62, chloroplastic isoform X1	Nicotiana tomentosiformis	NA	NA	NA	NA	NA
TR39035|c0_g1_i2	3603.24	1115.03	-1.69221	0.0374804	0.842472	No	hypothetical protein MIMGU_mgv1a005412mg	Mimulus guttatus	NA	proteolysis[GO:0006508]	peptidase activity[GO:0008233]	NA	NA
TR28910|c1_g2_i1	94.39	29.2404	-1.69067	0.0326205	0.80595	No	hypothetical protein MIMGU_mgv1a017777mg, partial	Mimulus guttatus	NA	NA	NA	NA	NA
TR30891|c0_g2_i3	94.39	29.2404	-1.69067	0.0326205	0.806301	No	PREDICTED: uncharacterized protein LOC105177716	Sesamum indicum	NA	NA	NA	NA	NA
TR32433|c2_g2_i3	94.39	29.2404	-1.69067	0.0326205	0.805249	No	NA	NA	NA	NA	NA	NA	NA
TR40814|c0_g4_i1	94.39	29.2404	-1.69067	0.0326205	0.8056	No	PREDICTED: two-component response regulator-like APRR5	Sesamum indicum	NA	NA	NA	NA	NA
TR43208|c3_g4_i1	94.39	29.2404	-1.69067	0.0326205	0.8049	No	PREDICTED: WEB family protein At5g55860-like	Sesamum indicum	NA	NA	NA	NA	NA
TR37602|c0_g1_i1	94.39	29.2404	-1.69067	0.0326205	0.806652	No	NA	NA	NA	NA	NA	NA	NA
TR33299|c3_g4_i4	188.78	58.4808	-1.69067	0.0246346	0.742317	No	PREDICTED: uncharacterized protein LOC105169883, partial	Sesamum indicum	NA	NA	NA	NA	NA
TR8888|c0_g1_i2	201.092	62.3795	-1.68871	0.0238612	0.736998	No	NA	NA	NA	NA	NA	NA	NA
TR38133|c1_g1_i5	313.949	97.4679	-1.68753	0.0184053	0.685533	No	PREDICTED: RING finger and CHY zinc finger domain-containing protein 1-like	Sesamum indicum	NA	NA	NA	NA	NA
TR39264|c0_g1_i3	106.702	33.1391	-1.68698	0.0322949	0.805968	No	PREDICTED: heat stress transcription factor A-2c-like isoform X2	Setaria italica	NA	NA	NA	NA	NA
TR36623|c0_g1_i6	213.403	66.2782	-1.68698	0.0231097	0.729658	No	PREDICTED: biotin carboxyl carrier protein of acetyl-CoA carboxylase 1, chloroplastic isoform X1	Erythranthe guttatus	NA	NA	NA	NA	NA
TR43056|c0_g7_i2	213.403	66.2782	-1.68698	0.0231097	0.729253	No	PREDICTED: uncharacterized protein LOC105158896, partial	Sesamum indicum	NA	NA	NA	NA	NA
TR44651|c0_g3_i2	439.119	136.455	-1.68618	0.0159369	0.66366	No	unnamed protein product	Vitis vinifera	NA	NA	NA	NA	NA
TR35041|c0_g9_i5	1216.81	378.176	-1.68598	0.0163344	0.664619	No	PREDICTED: probable ribose-5-phosphate isomerase 3, chloroplastic	Sesamum indicum	NA	NA	NA	NA	NA
TR36144|c0_g1_i1	338.573	105.265	-1.68544	0.0179033	0.683879	No	beta-1,3-glucanase	Camellia sinensis	NA	metabolic process[GO:0008152]	hydrolase activity, hydrolyzing O-glycosyl compounds[GO:0004553]	NA	NA
TR42227|c1_g2_i1	350.885	109.164	-1.6845	0.0176685	0.679019	No	PREDICTED: telomere repeat-binding protein 5	Sesamum indicum	NA	NA	NA	NA	NA
TR44629|c2_g1_i2	119.013	37.0378	-1.68405	0.0314297	0.80634	No	PREDICTED: uncharacterized protein LOC105169823 isoform X3	Sesamum indicum	NA	NA	NA	NA	NA
TR40019|c0_g2_i2	244.183	76.025	-1.68342	0.0214365	0.719632	No	NA	NA	NA	NA	NA	NA	NA
TR38383|c0_g2_i1	250.339	77.9744	-1.68281	0.0211455	0.715359	No	NA	NA	NA	NA	NA	NA	NA
TR32980|c0_g2_i4	3065.62	955.186	-1.68233	0.0331227	0.813402	No	PREDICTED: oxygen-evolving enhancer protein 2-1, chloroplastic-like	Sesamum indicum	NA	NA	NA	NA	NA
TR39264|c0_g2_i10	131.325	40.9365	-1.68168	0.0303565	0.795333	No	PREDICTED: heat shock factor protein HSF30	Sesamum indicum	NA	NA	NA	NA	NA
TR41876|c1_g2_i2	400.132	124.759	-1.68133	0.0168495	0.670684	No	unnamed protein product	Vitis vinifera	NA	transport[GO:0006810]	transporter activity[GO:0005215]	integral component of membrane[GO:0016021]	NA
TR30109|c0_g2_i1	3299.55	1029.26	-1.68066	0.0356742	0.834912	No	PREDICTED: auxin-binding protein ABP19a-like	Sesamum indicum	NA	NA	NA	NA	NA
TR42595|c0_g2_i4	137.481	42.8859	-1.68066	0.0298042	0.791818	No	PREDICTED: mechanosensitive ion channel protein 2, chloroplastic-like	Sesamum indicum	NA	NA	NA	NA	NA
TR40796|c0_g5_i4	143.637	44.8353	-1.67972	0.0292621	0.789228	No	NA	NA	NA	NA	NA	NA	NA
TR33113|c0_g1_i1	305.742	95.5186	-1.67846	0.0192256	0.696005	No	PREDICTED: protein disulfide isomerase-like 2-3	Sesamum indicum	NA	NA	NA	NA	NA
TR40743|c1_g1_i5	773.588	241.72	-1.67822	0.0149532	0.653353	No	PREDICTED: psbP domain-containing protein 3, chloroplastic	Sesamum indicum	NA	NA	NA	NA	NA
TR30404|c0_g3_i1	1085.49	339.188	-1.67818	0.0160656	0.667061	No	NA	NA	NA	NA	NA	NA	NA
TR36475|c0_g2_i1	623.795	194.936	-1.67807	0.0150261	0.654023	No	hypothetical protein MIMGU_mgv1a005057mg	Mimulus guttatus	NA	NA	NA	NA	NA
TR40680|c2_g1_i3	997.251	311.897	-1.67688	0.0157147	0.665136	No	NA	NA	NA	NA	NA	NA	NA
TR31615|c0_g1_i1	336.521	105.265	-1.67667	0.0185144	0.685551	No	PREDICTED: oxygen-evolving enhancer protein 3-2, chloroplastic-like	Vigna radiata var. radiata	NA	NA	NA	NA	NA
TR32070|c0_g1_i9	859.77	269.012	-1.67628	0.0152453	0.658014	No	jasmonate ZIM-domain protein 1	Salvia miltiorrhiza	NA	NA	NA	NA	NA
TR40948|c3_g1_i3	186.728	58.4808	-1.6749	0.0260505	0.751495	No	unnamed protein product	Coffea canephora	NA	glycolytic process[GO:0006096]	potassium ion binding[GO:0030955] ; pyruvate kinase activity[GO:0004743] ; magnesium ion binding[GO:0000287] ; kinase activity[GO:0016301]	NA	map01130:Biosynthesis of antibiotics(kinase[ec:2.7.1.40]) ; map00620:Pyruvate metabolism(kinase[ec:2.7.1.40]) ; map00010:Glycolysis / Gluconeogenesis(kinase[ec:2.7.1.40]) ; map00230:Purine metabolism(kinase[ec:2.7.1.40])
TR35318|c1_g1_i1	4393.24	1376.25	-1.67455	0.0479629	0.894107	No	PREDICTED: ribose-phosphate pyrophosphokinase 1	Sesamum indicum	NA	NA	NA	NA	NA
TR29266|c1_g4_i1	609.431	191.037	-1.67361	0.0153223	0.659334	No	hypothetical protein MIMGU_mgv1a015373mg	Mimulus guttatus	NA	NA	NA	NA	NA
TR32606|c0_g1_i2	205.196	64.3288	-1.67346	0.0247362	0.744195	No	PREDICTED: UDP-glycosyltransferase 74E2-like	Sesamum indicum	NA	NA	NA	NA	NA
TR42331|c0_g4_i2	435.015	136.455	-1.67264	0.0168021	0.669739	No	NA	NA	NA	NA	NA	NA	NA
TR43971|c0_g1_i3	1403.54	440.555	-1.67167	0.0185269	0.685568	No	PREDICTED: CSC1-like protein ERD4	Sesamum indicum	NA	NA	NA	NA	NA
TR25875|c0_g1_i3	235.975	74.0756	-1.67156	0.0227773	0.724802	No	hypothetical protein LR48_Vigan01g056100	Vigna angularis	NA	NA	NA	NA	NA
TR32103|c0_g1_i1	235.975	74.0756	-1.67156	0.0227773	0.725615	No	PREDICTED: phenazine biosynthesis-like domain-containing protein 1	Sesamum indicum	NA	NA	NA	NA	NA
TR35730|c0_g1_i2	235.975	74.0756	-1.67156	0.0227773	0.725208	No	PREDICTED: RING finger and CHY zinc finger domain-containing protein 1-like	Sesamum indicum	NA	NA	NA	NA	NA
TR34573|c0_g1_i1	720.237	226.126	-1.67135	0.0153062	0.65914	No	PREDICTED: uncharacterized protein LOC105165613	Sesamum indicum	NA	NA	NA	NA	NA
TR39787|c0_g3_i2	6681.17	2099.46	-1.67008	0.0741621	0.977374	No	PREDICTED: polyphenol oxidase I, chloroplastic-like	Sesamum indicum	NA	NA	NA	NA	NA
TR7858|c0_g3_i6	551.976	173.493	-1.66973	0.0157991	0.663762	No	PREDICTED: LOW QUALITY PROTEIN: transcription factor UNE10-like	Sesamum indicum	NA	NA	NA	NA	NA
TR34720|c0_g1_i2	334.469	105.265	-1.66784	0.0191476	0.694067	No	NA	NA	NA	NA	NA	NA	NA
TR33586|c0_g1_i4	396.028	124.759	-1.66646	0.0178495	0.682281	No	PREDICTED: uncharacterized protein LOC105168449	Sesamum indicum	NA	NA	NA	NA	NA
TR8141|c0_g3_i1	970.576	306.049	-1.66508	0.0163147	0.665726	No	PREDICTED: MAR-binding filament-like protein 1-1	Sesamum indicum	NA	NA	NA	NA	NA
TR7600|c0_g1_i2	1785.2	563.365	-1.66395	0.0223032	0.725984	No	PREDICTED: alpha-galactosidase-like	Sesamum indicum	NA	NA	NA	NA	NA
TR29762|c0_g2_i2	2741.41	867.465	-1.66004	0.0321292	0.805372	No	PREDICTED: uncharacterized protein LOC105164113	Sesamum indicum	NA	NA	NA	NA	NA
TR39033|c0_g3_i1	80.0263	25.3417	-1.65896	0.0359277	0.838082	No	PREDICTED: dihydrolipoyllysine-residue acetyltransferase component 4 of pyruvate dehydrogenase complex, chloroplastic	Sesamum indicum	NA	NA	NA	NA	NA
TR40317|c1_g5_i1	80.0263	25.3417	-1.65896	0.0359277	0.838426	No	NA	NA	NA	NA	NA	NA	NA
TR29404|c0_g1_i1	73.8704	23.3923	-1.65896	0.03577	0.835775	No	unnamed protein product	Coffea canephora	NA	NA	NA	integral component of membrane[GO:0016021]	NA
TR30936|c0_g2_i1	73.8704	23.3923	-1.65896	0.03577	0.836119	No	PREDICTED: probable serine/threonine-protein kinase At1g01540	Sesamum indicum	NA	NA	NA	NA	NA
TR33592|c0_g6_i6	73.8704	23.3923	-1.65896	0.03577	0.836463	No	PREDICTED: nifU-like protein 2, chloroplastic	Sesamum indicum	NA	NA	NA	NA	NA
TR35106|c0_g3_i1	73.8704	23.3923	-1.65896	0.03577	0.835432	No	PREDICTED: protein YLS9	Sesamum indicum	NA	NA	NA	NA	NA
TR3918|c0_g1_i7	98.4939	31.1897	-1.65896	0.0356329	0.835323	No	NA	NA	NA	NA	NA	NA	NA
TR40699|c1_g2_i1	98.4939	31.1897	-1.65896	0.0356329	0.834978	No	PREDICTED: tubby-like F-box protein 3	Sesamum indicum	NA	NA	NA	NA	NA
TR34010|c1_g4_i1	104.65	33.1391	-1.65896	0.0352222	0.832912	No	NA	NA	NA	NA	NA	NA	NA
TR38673|c1_g5_i1	104.65	33.1391	-1.65896	0.0352222	0.832565	No	PREDICTED: uncharacterized protein LOC105159671 isoform X1	Sesamum indicum	NA	NA	NA	NA	NA
TR40715|c0_g5_i1	67.7146	21.4429	-1.65896	0.0352157	0.833453	No	PREDICTED: LOW QUALITY PROTEIN: DELLA protein GAI	Sesamum indicum	NA	NA	NA	NA	NA
TR40960|c1_g3_i3	67.7146	21.4429	-1.65896	0.0352157	0.833105	No	GDS_OCIBARecName: Full=Germacrene-D synthase; AltName: Full=(-)-germacrene D synthase	Ocimum basilicum	Lamiaceae	terpenoid biosynthetic process[GO:0016114]	magnesium ion binding[GO:0000287] ; terpene synthase activity[GO:0010333]	NA	NA
TR40961|c0_g1_i1	67.7146	21.4429	-1.65896	0.0352157	0.8338	No	hypothetical protein PHAVU_006G108200g	Phaseolus vulgaris	NA	oxidation-reduction process[GO:0055114]	violaxanthin de-epoxidase activity[GO:0046422]	chloroplast[GO:0009507]	NA
TR42649|c2_g9_i1	110.806	35.0885	-1.65896	0.03468	0.831163	No	NA	NA	NA	NA	NA	NA	NA
TR35610|c0_g1_i1	116.962	37.0378	-1.65896	0.0340564	0.822816	No	hypothetical protein MIMGU_mgv1a012372mg	Mimulus guttatus	NA	NA	NA	NA	NA
TR40740|c0_g2_i1	116.962	37.0378	-1.65896	0.0340564	0.822466	No	PREDICTED: serine/threonine-protein kinase HT1	Sesamum indicum	NA	NA	NA	NA	NA
TR25003|c0_g1_i1	61.5587	19.4936	-1.65896	0.0339532	0.823123	No	hypothetical protein MIMGU_mgv1a016899mg	Mimulus guttatus	NA	NA	NA	NA	NA
TR29105|c2_g2_i1	61.5587	19.4936	-1.65896	0.0339532	0.822421	No	hypothetical protein B456_006G267400	Gossypium raimondii	NA	translational frameshifting[GO:0006452] ; positive regulation of translational termination[GO:0045905] ; positive regulation of translational elongation[GO:0045901]	translation elongation factor activity[GO:0003746] ; ribosome binding[GO:0043022]	NA	NA
TR35203|c2_g4_i1	61.5587	19.4936	-1.65896	0.0339532	0.822772	No	PREDICTED: armadillo repeat-containing protein LFR	Sesamum indicum	NA	NA	NA	NA	NA
TR36479|c1_g2_i3	123.117	38.9872	-1.65896	0.0333889	0.816763	No	PREDICTED: triadin-like	Erythranthe guttatus	NA	NA	NA	NA	NA
TR43451|c0_g4_i1	135.429	42.8859	-1.65896	0.0320249	0.80311	No	PREDICTED: valine--tRNA ligase, mitochondrial isoform X1	Sesamum indicum	NA	NA	NA	NA	NA
TR33161|c0_g2_i2	55.4028	17.5442	-1.65896	0.0315602	0.802439	No	Uncharacterized protein isoform 2	Theobroma cacao	NA	NA	NA	NA	NA
TR32385|c0_g7_i4	141.585	44.8353	-1.65896	0.0313631	0.804995	No	NA	NA	NA	NA	NA	NA	NA
TR36213|c0_g4_i1	166.208	52.6327	-1.65896	0.0290623	0.787955	No	hypothetical protein MIMGU_mgv1a010951mg	Mimulus guttatus	NA	NA	NA	membrane[GO:0016020]	NA
TR33027|c0_g2_i2	172.364	54.582	-1.65896	0.0285658	0.785365	No	NA	NA	NA	NA	NA	NA	NA
TR43110|c0_g1_i3	172.364	54.582	-1.65896	0.0285658	0.784985	No	PREDICTED: TPR repeat-containing thioredoxin TTL1-like	Sesamum indicum	NA	NA	NA	NA	NA
TR30597|c1_g5_i1	49.247	15.5949	-1.65896	0.0275417	0.768746	No	RS23_EUPESRecName: Full=40S ribosomal protein S23	Euphorbia esula	NA	translation[GO:0006412]	structural constituent of ribosome[GO:0003735]	small ribosomal subunit[GO:0015935]	NA
TR33306|c0_g2_i1	49.247	15.5949	-1.65896	0.0275417	0.768369	No	hypothetical protein MIMGU_mgv1a013476mg	Mimulus guttatus	NA	NA	NA	NA	NA
TR2911|c0_g3_i1	215.455	68.2276	-1.65896	0.0251304	0.747737	No	PREDICTED: xylem cysteine proteinase 1-like	Solanum tuberosum	NA	proteolysis[GO:0006508]	cysteine-type peptidase activity[GO:0008234]	NA	NA
TR29762|c0_g1_i1	240.079	76.025	-1.65896	0.0234793	0.731167	No	PREDICTED: uncharacterized protein LOC105164113	Sesamum indicum	NA	NA	NA	NA	NA
TR37841|c0_g5_i2	246.235	77.9744	-1.65896	0.0231145	0.728595	No	unnamed protein product	Coffea canephora	NA	regulation of transcription, DNA-templated[GO:0006355]	sequence-specific DNA binding[GO:0043565] ; transcription factor activity, sequence-specific DNA binding[GO:0003700]	NA	NA
TR38508|c0_g1_i5	246.235	77.9744	-1.65896	0.0231145	0.729	No	PREDICTED: potassium channel SKOR-like	Sesamum indicum	NA	NA	NA	NA	NA
TR23503|c0_g2_i1	43.0911	13.6455	-1.65896	0.0220219	0.723043	No	hypothetical protein MIMGU_mgv1a001891mg	Mimulus guttatus	NA	proteolysis[GO:0006508]	serine-type endopeptidase activity[GO:0004252]	membrane[GO:0016020] ; cell wall[GO:0005618]	NA
TR29381|c1_g1_i1	43.0911	13.6455	-1.65896	0.0220219	0.723461	No	PREDICTED: EPIDERMAL PATTERNING FACTOR-like protein 9	Sesamum indicum	NA	NA	NA	NA	NA
TR35963|c0_g1_i1	43.0911	13.6455	-1.65896	0.0220219	0.72388	No	PREDICTED: uncharacterized protein LOC105166884 isoform X2	Sesamum indicum	NA	NA	NA	NA	NA
TR37812|c0_g1_i1	43.0911	13.6455	-1.65896	0.0220219	0.724719	No	NA	NA	NA	NA	NA	NA	NA
TR42850|c0_g4_i1	43.0911	13.6455	-1.65896	0.0220219	0.724299	No	PREDICTED: scarecrow-like protein 13	Sesamum indicum	NA	NA	NA	NA	NA
TR31647|c0_g4_i2	283.17	89.6705	-1.65896	0.021331	0.717785	No	hypothetical protein MIMGU_mgv1a011837mg	Mimulus guttatus	NA	NA	nucleic acid binding[GO:0003676]	NA	NA
TR34287|c1_g1_i1	36.9352	11.6962	-1.65896	0.0155231	0.660967	No	PREDICTED: probable pectate lyase 22	Sesamum indicum	NA	NA	NA	NA	NA
TR41648|c1_g2_i1	36.9352	11.6962	-1.65896	0.0155231	0.660472	No	PREDICTED: uncharacterized protein LOC105174183	Sesamum indicum	NA	NA	NA	NA	NA
TR39353|c0_g2_i3	8320.68	2637.48	-1.65754	0.0954351	1.02881	No	PREDICTED: phosphoglycerate kinase, chloroplastic	Sesamum indicum	NA	NA	NA	NA	NA
TR3741|c3_g1_i3	884.393	280.708	-1.65562	0.016568	0.668855	No	PREDICTED: ethylene-responsive transcription factor RAP2-4	Sesamum indicum	NA	NA	NA	NA	NA
TR35255|c1_g3_i1	23107.1	7337.39	-1.655	0.256261	1.15496	No	PREDICTED: chlorophyll a-b binding protein CP29.2, chloroplastic-like	Solanum lycopersicum	NA	response to light stimulus[GO:0009416] ; protein-chromophore linkage[GO:0018298] ; photosynthesis, light harvesting in photosystem I[GO:0009768]	chlorophyll binding[GO:0016168] ; metal ion binding[GO:0046872] ; pigment binding[GO:0031409]	integral component of membrane[GO:0016021] ; photosystem I[GO:0009522] ; chloroplast envelope[GO:0009941] ; chloroplast thylakoid membrane[GO:0009535] ; photosystem II[GO:0009523] ; plastoglobule[GO:0010287]	NA
TR36424|c1_g2_i1	2954.82	939.591	-1.65296	0.0351276	0.836596	No	hypothetical protein MIMGU_mgv1a014875mg	Mimulus guttatus	NA	cell redox homeostasis[GO:0045454] ; glycerol ether metabolic process[GO:0006662] ; oxidation-reduction process[GO:0055114]	protein disulfide oxidoreductase activity[GO:0015035]	cell[GO:0005623]	NA
TR39966|c0_g1_i1	2390.53	760.25	-1.65278	0.0292399	0.789755	No	PREDICTED: isoamylase 3, chloroplastic	Erythranthe guttatus	NA	NA	NA	NA	NA
TR2741|c1_g1_i4	478.106	152.05	-1.65278	0.0174654	0.676245	No	NA	NA	NA	NA	NA	NA	NA
TR33095|c0_g6_i4	26884.7	8553.79	-1.65215	0.291684	1.15255	No	PREDICTED: carbonic anhydrase, chloroplastic-like isoform X2	Sesamum indicum	NA	NA	NA	NA	NA
TR35723|c0_g3_i1	336.521	107.215	-1.65019	0.0203041	0.704518	No	hypothetical protein MIMGU_mgv1a008760mg	Mimulus guttatus	NA	NA	NA	NA	NA
TR35664|c1_g2_i2	318.053	101.367	-1.64969	0.0208588	0.71202	No	hypothetical protein MIMGU_mgv1a003608mg	Mimulus guttatus	NA	metabolic process[GO:0008152]	catalytic activity[GO:0003824]	NA	NA
TR41260|c0_g1_i5	1186.03	378.176	-1.64901	0.0185514	0.686028	No	NA	NA	NA	NA	NA	NA	NA
TR41184|c0_g5_i6	281.118	89.6705	-1.64847	0.0221842	0.725022	No	PREDICTED: CDPK-related kinase 1-like	Sesamum indicum	NA	NA	NA	NA	NA
TR34143|c0_g1_i3	268.806	85.7718	-1.64799	0.0227633	0.72721	No	PREDICTED: uncharacterized protein LOC105168960	Sesamum indicum	NA	NA	NA	NA	NA
TR34676|c0_g1_i4	268.806	85.7718	-1.64799	0.0227633	0.726802	No	PREDICTED: uncharacterized protein LOC105159648	Sesamum indicum	NA	NA	NA	NA	NA
TR30052|c2_g2_i1	738.704	235.872	-1.64699	0.0167909	0.670704	No	PREDICTED: photosystem I reaction center subunit IV B, chloroplastic	Sesamum indicum	NA	NA	NA	NA	NA
TR34514|c0_g1_i1	720.237	230.024	-1.64668	0.0168001	0.670129	No	PREDICTED: LOW QUALITY PROTEIN: ribose-phosphate pyrophosphokinase 1-like	Erythranthe guttatus	NA	NA	NA	NA	NA
TR7430|c0_g4_i1	231.871	74.0756	-1.64625	0.0250047	0.746344	No	PREDICTED: copper transport protein CCH-like	Sesamum indicum	NA	NA	NA	NA	NA
TR42789|c0_g2_i1	463.742	148.151	-1.64625	0.0180645	0.685884	No	PREDICTED: tubulin--tyrosine ligase-like protein 12 isoform X1	Sesamum indicum	NA	NA	NA	NA	NA
TR30246|c0_g1_i2	219.559	70.1769	-1.64554	0.0259257	0.751712	No	PREDICTED: transcription factor bHLH150	Sesamum indicum	NA	NA	NA	NA	NA
TR24545|c0_g1_i1	523.249	167.645	-1.64209	0.0177079	0.679153	No	hypothetical protein B456_005G050200	Gossypium raimondii	NA	carbohydrate metabolic process[GO:0005975] ; malate metabolic process[GO:0006108] ; tricarboxylic acid cycle[GO:0006099]	L-malate dehydrogenase activity[GO:0030060]	NA	map00630:Glyoxylate and dicarboxylate metabolism(dehydrogenase[ec:1.1.1.37]) ; map01130:Biosynthesis of antibiotics(dehydrogenase[ec:1.1.1.37]) ; map00720:Carbon fixation pathways in prokaryotes(dehydrogenase[ec:1.1.1.37]) ; map00020:Citrate cycle (TCA cycle)(dehydrogenase[ec:1.1.1.37]) ; map00620:Pyruvate metabolism(dehydrogenase[ec:1.1.1.37]) ; map00270:Cysteine and methionine metabolism(dehydr…
TR35089|c0_g1_i1	1003.41	321.644	-1.64137	0.0180005	0.684367	No	PREDICTED: CBS domain-containing protein CBSX3, mitochondrial-like	Sesamum indicum	NA	NA	NA	NA	NA
TR33799|c0_g3_i1	158.001	50.6833	-1.64035	0.0314893	0.802792	No	hypothetical protein MIMGU_mgv1a009899mg	Mimulus guttatus	NA	NA	NA	NA	NA
TR37612|c1_g3_i1	158.001	50.6833	-1.64035	0.0314893	0.802432	No	PREDICTED: uncharacterized protein LOC105164832	Sesamum indicum	NA	NA	NA	NA	NA
TR41565|c0_g1_i5	158.001	50.6833	-1.64035	0.0314893	0.802072	No	hypothetical protein MIMGU_mgv1a0041261mg, partial	Mimulus guttatus	NA	cell redox homeostasis[GO:0045454]	NA	cell[GO:0005623]	NA
TR33966|c1_g4_i1	151.845	48.734	-1.6396	0.0321534	0.805267	No	PREDICTED: probable serine/threonine-protein kinase drkD	Sesamum indicum	NA	NA	NA	NA	NA
TR42285|c0_g8_i5	595.067	191.037	-1.6392	0.0174784	0.675366	No	Ketol-acid reductoisomerase	Morus notabilis	NA	branched-chain amino acid biosynthetic process[GO:0009082] ; oxidation-reduction process[GO:0055114]	ketol-acid reductoisomerase activity[GO:0004455] ; isomerase activity[GO:0016853]	integral component of membrane[GO:0016021]	map00290:Valine, leucine and isoleucine biosynthesis(reductoisomerase (NADP+)[ec:1.1.1.86]) ; map01130:Biosynthesis of antibiotics(reductoisomerase (NADP+)[ec:1.1.1.86]) ; map00770:Pantothenate and CoA biosynthesis(reductoisomerase (NADP+)[ec:1.1.1.86])
TR42222|c1_g1_i4	1134.73	364.53	-1.63824	0.0189712	0.691645	No	PREDICTED: subtilisin-like protease SBT5.3	Sesamum indicum	NA	NA	NA	NA	NA
TR2793|c0_g7_i4	818.731	263.163	-1.63743	0.0175415	0.675967	No	glycine-rich RNA-binding protein 1-3	Capsicum annuum	NA	NA	nucleic acid binding[GO:0003676] ; nucleotide binding[GO:0000166]	NA	NA
TR7739|c0_g1_i1	406.287	130.607	-1.63727	0.0195955	0.692623	No	PREDICTED: xanthoxin dehydrogenase	Sesamum indicum	NA	NA	NA	NA	NA
TR40486|c0_g3_i6	133.377	42.8859	-1.63694	0.0344219	0.826722	No	NA	NA	NA	NA	NA	NA	NA
TR41627|c1_g3_i6	127.221	40.9365	-1.63588	0.0352467	0.832452	No	NA	NA	NA	NA	NA	NA	NA
TR41735|c1_g1_i1	127.221	40.9365	-1.63588	0.0352467	0.832798	No	methionine synthase	Genlisea aurea	NA	methionine biosynthetic process[GO:0009086] ; methylation[GO:0032259]	zinc ion binding[GO:0008270] ; 5-methyltetrahydropteroyltriglutamate-homocysteine S-methyltransferase activity[GO:0003871]	NA	map00450:Selenocompound metabolism(S-methyltransferase[ec:2.1.1.14]) ; map00270:Cysteine and methionine metabolism(S-methyltransferase[ec:2.1.1.14])
TR21385|c0_g1_i1	121.065	38.9872	-1.63472	0.0360851	0.838653	No	PREDICTED: chlorophyll a-b binding protein CP24 10A, chloroplastic	Sesamum indicum	NA	NA	NA	NA	NA
TR3584|c0_g1_i10	121.065	38.9872	-1.63472	0.0360851	0.83831	No	NA	NA	NA	NA	NA	NA	NA
TR33305|c2_g1_i1	114.91	37.0378	-1.63343	0.0369164	0.844837	No	PREDICTED: protein TRANSPARENT TESTA 12-like	Sesamum indicum	NA	NA	NA	NA	NA
TR38186|c0_g1_i4	114.91	37.0378	-1.63343	0.0369164	0.845519	No	PREDICTED: zinc finger CCCH domain-containing protein ZFN-like	Sesamum indicum	NA	NA	NA	NA	NA
TR40019|c0_g2_i8	114.91	37.0378	-1.63343	0.0369164	0.845178	No	hypothetical protein MIMGU_mgv1a008527mg	Mimulus guttatus	NA	tetrapyrrole biosynthetic process[GO:0033014] ; peptidyl-pyrromethane cofactor linkage[GO:0018160]	hydroxymethylbilane synthase activity[GO:0004418]	NA	map00860:Porphyrin and chlorophyll metabolism(synthase[ec:2.5.1.61])
TR41258|c0_g1_i2	108.754	35.0885	-1.632	0.0377118	0.843999	No	NA	NA	NA	NA	NA	NA	NA
TR3105|c0_g1_i3	1951.41	629.643	-1.63191	0.0266824	0.757792	No	PREDICTED: protein YLS9	Sesamum indicum	NA	NA	NA	NA	NA
TR15417|c0_g2_i1	102.598	33.1391	-1.63039	0.0384321	0.846116	No	hypothetical protein B456_003G115000	Gossypium raimondii	NA	metabolic process[GO:0008152]	GTPase activity[GO:0003924] ; GTP binding[GO:0005525]	NA	NA
TR32189|c0_g4_i1	102.598	33.1391	-1.63039	0.0384321	0.845788	No	PREDICTED: uncharacterized protein LOC104115794	Nicotiana tomentosiformis	NA	NA	NA	NA	NA
TR3986|c0_g3_i9	102.598	33.1391	-1.63039	0.0384321	0.846444	No	PREDICTED: short-chain dehydrogenase TIC 32, chloroplastic-like isoform X2	Erythranthe guttatus	NA	NA	NA	NA	NA
TR35041|c0_g4_i4	295.482	95.5186	-1.62922	0.0231064	0.729959	No	hypothetical protein MIMGU_mgv1a011534mg	Mimulus guttatus	NA	pentose-phosphate shunt, non-oxidative branch[GO:0009052]	ribose-5-phosphate isomerase activity[GO:0004751]	NA	map00030:Pentose phosphate pathway(isomerase[ec:5.3.1.6]) ; map01130:Biosynthesis of antibiotics(isomerase[ec:5.3.1.6]) ; map00051:Fructose and mannose metabolism(isomerase[ec:5.3.1.6]) ; map00710:Carbon fixation in photosynthetic organisms(isomerase[ec:5.3.1.6])
TR25723|c0_g1_i1	96.442	31.1897	-1.62859	0.0390235	0.850892	No	PREDICTED: casein kinase II subunit alpha-like	Sesamum indicum	NA	NA	NA	NA	NA
TR26175|c0_g1_i3	96.442	31.1897	-1.62859	0.0390235	0.851546	No	hypothetical protein EUGRSUZ_F02151	Eucalyptus grandis	NA	NA	NA	NA	NA
TR35874|c0_g1_i1	96.442	31.1897	-1.62859	0.0390235	0.851219	No	PREDICTED: phosphoserine aminotransferase 2, chloroplastic	Sesamum indicum	NA	NA	NA	NA	NA
TR3024|c0_g1_i2	192.884	62.3795	-1.62859	0.0295524	0.791796	No	hypothetical protein MIMGU_mgv1a008991mg	Mimulus guttatus	NA	oxidation-reduction process[GO:0055114]	metal ion binding[GO:0046872] ; oxidoreductase activity[GO:0016491]	NA	NA
TR3496|c1_g1_i1	186.728	60.4301	-1.6276	0.0301838	0.791536	No	PREDICTED: uncharacterized protein LOC105179123	Sesamum indicum	NA	NA	NA	NA	NA
TR31888|c0_g1_i1	90.2861	29.2404	-1.62654	0.0394166	0.85097	No	hypothetical protein MIMGU_mgv1a008512mg	Mimulus guttatus	NA	oxidation-reduction process[GO:0055114]	oxidoreductase activity[GO:0016491]	NA	NA
TR37841|c0_g6_i4	90.2861	29.2404	-1.62654	0.0394166	0.851294	No	PREDICTED: probable WRKY transcription factor 40	Sesamum indicum	NA	NA	NA	NA	NA
TR33439|c0_g2_i1	709.977	230.024	-1.62599	0.0181516	0.681448	No	hypothetical protein PHAVU_004G093100g	Phaseolus vulgaris	NA	photosynthesis, light harvesting[GO:0009765] ; protein-chromophore linkage[GO:0018298]	chlorophyll binding[GO:0016168]	photosystem II[GO:0009523] ; integral component of membrane[GO:0016021] ; chloroplast[GO:0009507]	NA
TR43048|c0_g1_i3	174.416	56.5314	-1.62541	0.0314856	0.803421	No	NA	NA	NA	NA	NA	NA	NA
TR39216|c2_g1_i4	258.547	83.8224	-1.62502	0.0251074	0.747837	No	PREDICTED: ATP-dependent zinc metalloprotease FTSH 7, chloroplastic-like	Sesamum indicum	NA	NA	NA	NA	NA
TR7443|c0_g2_i1	847.458	274.86	-1.62445	0.0184996	0.688595	No	PREDICTED: peroxiredoxin Q, chloroplastic	Sesamum indicum	NA	NA	NA	NA	NA
TR31786|c1_g4_i9	84.1302	27.291	-1.6242	0.0397455	0.852883	No	NA	NA	NA	NA	NA	NA	NA
TR36947|c1_g2_i1	84.1302	27.291	-1.6242	0.0397455	0.852239	No	PREDICTED: mitochondrial uncoupling protein 1	Nicotiana tomentosiformis	NA	NA	NA	NA	NA
TR41822|c0_g3_i6	84.1302	27.291	-1.6242	0.0397455	0.852561	No	NA	NA	NA	NA	NA	NA	NA
TR39050|c0_g2_i1	168.26	54.582	-1.6242	0.0321462	0.805441	No	PREDICTED: uncharacterized protein LOC105176091	Sesamum indicum	NA	NA	NA	NA	NA
TR31953|c0_g1_i1	15332.2	4982.56	-1.62161	0.18496	1.12688	No	PREDICTED: bifunctional nuclease 2	Sesamum indicum	NA	NA	NA	NA	NA
TR39353|c0_g1_i2	3833.06	1245.64	-1.62161	0.0489252	0.897901	No	unknown	Lotus japonicus	NA	glycolytic process[GO:0006096]	phosphoglycerate kinase activity[GO:0004618]	NA	map01130:Biosynthesis of antibiotics(kinase[ec:2.7.2.3]) ; map00710:Carbon fixation in photosynthetic organisms(kinase[ec:2.7.2.3]) ; map00010:Glycolysis / Gluconeogenesis(kinase[ec:2.7.2.3])
TR7914|c1_g1_i1	77.9744	25.3417	-1.62149	0.0400478	0.851331	No	NA	NA	NA	NA	NA	NA	NA
TR8224|c6_g4_i3	77.9744	25.3417	-1.62149	0.0400478	0.851012	No	PREDICTED: G-type lectin S-receptor-like serine/threonine-protein kinase At4g03230 isoform X5	Erythranthe guttatus	NA	NA	NA	NA	NA
TR8274|c1_g3_i1	77.9744	25.3417	-1.62149	0.0400478	0.85165	No	PREDICTED: long chain acyl-CoA synthetase 2-like isoform X1	Solanum tuberosum	NA	wax biosynthetic process[GO:0010025] ; fatty acid biosynthetic process[GO:0006633] ; cutin biosynthetic process[GO:0010143] ; lateral root formation[GO:0010311] ; defense response to insect[GO:0002213] ; long-chain fatty acid metabolic process[GO:0001676] ; defense response to fungus[GO:0050832]	very long-chain fatty acid-CoA ligase activity[GO:0031957]	plasmodesma[GO:0009506]	NA
TR2694|c2_g5_i1	155.949	50.6833	-1.62149	0.0335364	0.819311	No	PREDICTED: uncharacterized protein LOC105172004	Sesamum indicum	NA	NA	NA	NA	NA
TR43437|c1_g3_i2	545.82	177.392	-1.62149	0.0189229	0.692104	No	PREDICTED: metacaspase-4	Sesamum indicum	NA	NA	NA	NA	NA
TR51054|c0_g1_i1	227.767	74.0756	-1.62049	0.0274625	0.7688	No	S-adenosyl-L-homocysteine hydrolase-like	Solanum tuberosum	NA	one-carbon metabolic process[GO:0006730]	adenosylhomocysteinase activity[GO:0004013]	NA	map00270:Cysteine and methionine metabolism(S-adenosylhomocysteine synthase[ec:3.3.1.1])
TR34379|c0_g4_i3	958.264	311.897	-1.61935	0.0193093	0.695932	No	PREDICTED: proline-rich protein 4	Sesamum indicum	NA	NA	NA	NA	NA
TR33196|c0_g1_i4	652.522	212.48	-1.6187	0.0186927	0.689457	No	hypothetical protein MIMGU_mgv1a008621mg	Mimulus guttatus	NA	methylation[GO:0032259]	methyltransferase activity[GO:0008168]	NA	NA
TR34717|c0_g5_i1	71.8185	23.3923	-1.61832	0.0401593	0.850835	No	PREDICTED: uncharacterized protein LOC105171728	Sesamum indicum	NA	NA	NA	NA	NA
TR39127|c1_g1_i5	71.8185	23.3923	-1.61832	0.0401593	0.851152	No	unnamed protein product	Coffea canephora	NA	oxidation-reduction process[GO:0055114]	oxidoreductase activity[GO:0016491]	NA	NA
TR3227|c0_g2_i12	71.8185	23.3923	-1.61832	0.0401593	0.85147	No	PREDICTED: gamma-glutamyl hydrolase 2-like	Cucumis melo	NA	NA	NA	NA	NA
TR43326|c0_g5_i4	430.911	140.354	-1.61832	0.0204915	0.704988	No	hypothetical protein CISIN_1g0059551mg, partial	Citrus sinensis	NA	NA	ATP binding[GO:0005524]	NA	NA
TR34090|c0_g4_i1	1686.71	549.719	-1.61744	0.0252575	0.75034	No	BnaC03g46680D	Brassica napus	NA	NA	ATP binding[GO:0005524]	NA	NA
TR34533|c0_g2_i1	137.481	44.8353	-1.61653	0.0360614	0.83879	No	PREDICTED: prosaposin-like isoform X2	Sesamum indicum	NA	NA	NA	NA	NA
TR42796|c0_g1_i1	203.144	66.2782	-1.61589	0.0298392	0.791637	No	PREDICTED: putative chromatin-remodeling complex ATPase chain	Sesamum indicum	NA	NA	NA	NA	NA
TR29966|c4_g3_i2	406.287	132.556	-1.61589	0.0211336	0.715381	No	PREDICTED: thioredoxin-like 3-1, chloroplastic isoform X1	Populus euphratica	NA	NA	NA	NA	NA
TR38702|c1_g5_i1	675.094	220.278	-1.61577	0.0188678	0.691874	No	PREDICTED: transcription factor MYC4-like	Sesamum indicum	NA	NA	NA	NA	NA
TR36212|c1_g3_i3	740.756	241.72	-1.61566	0.0188813	0.691919	No	PREDICTED: equilibrative nucleotide transporter 1	Sesamum indicum	NA	NA	NA	NA	NA
TR3954|c1_g2_i3	65.6626	21.4429	-1.61457	0.0398305	0.850851	No	hypothetical protein MIMGU_mgv1a004245mg	Mimulus guttatus	NA	proteolysis[GO:0006508]	aspartic-type endopeptidase activity[GO:0004190]	integral component of membrane[GO:0016021]	NA
TR40428|c1_g5_i2	65.6626	21.4429	-1.61457	0.0398305	0.850531	No	hypothetical protein MIMGU_mgv1a008480mg	Mimulus guttatus	NA	ubiquitin-dependent protein catabolic process[GO:0006511]	NA	NA	NA
TR8193|c0_g1_i1	65.6626	21.4429	-1.61457	0.0398305	0.851171	No	PREDICTED: potassium transporter 2-like	Fragaria vesca subsp. vesca	NA	NA	NA	NA	NA
TR38201|c0_g2_i2	65.6626	21.4429	-1.61457	0.0398305	0.850212	No	PREDICTED: protein IRREGULAR XYLEM 15-like	Sesamum indicum	NA	NA	NA	NA	NA
TR40086|c0_g7_i8	525.301	171.544	-1.61457	0.0195634	0.694079	No	PREDICTED: ribulose-1,5 bisphosphate carboxylase/oxygenase large subunit N-methyltransferase, chloroplastic isoform X1	Sesamum indicum	NA	NA	NA	NA	NA
TR33751|c1_g1_i3	256.495	83.8224	-1.61352	0.0261893	0.751303	No	PREDICTED: serine/threonine-protein kinase At5g01020	Sesamum indicum	NA	NA	NA	NA	NA
TR37882|c0_g2_i1	703.821	230.024	-1.61342	0.0190198	0.692083	No	NA	NA	NA	NA	NA	NA	NA
TR32118|c0_g1_i1	2546.48	832.376	-1.6132	0.0350758	0.836765	No	PREDICTED: phosphoglucan phosphatase DSP4, amyloplastic	Sesamum indicum	NA	NA	NA	NA	NA
TR40244|c1_g1_i2	125.169	40.9365	-1.61242	0.0379982	0.842114	No	PREDICTED: putative F-box/LRR-repeat protein At3g42770	Erythranthe guttatus	NA	NA	NA	NA	NA
TR42227|c1_g2_i4	309.845	101.367	-1.61197	0.0239999	0.73489	No	PREDICTED: telomere repeat-binding protein 5	Sesamum indicum	NA	NA	NA	NA	NA
TR43100|c0_g1_i4	184.676	60.4301	-1.61166	0.0318925	0.802625	No	hypothetical protein L484_022042	Morus notabilis	NA	NA	NA	NA	NA
TR30635|c0_g1_i2	369.352	120.86	-1.61166	0.0222931	0.726906	No	PREDICTED: LOW QUALITY PROTEIN: benzyl alcohol O-benzoyltransferase-like	Sesamum indicum	NA	NA	NA	NA	NA
TR31684|c0_g3_i5	982.887	321.644	-1.61156	0.0200042	0.70053	No	SQUAMOSA promoter binding protein-like 3, partial	Salvia miltiorrhiza	NA	NA	DNA binding[GO:0003677]	nucleus[GO:0005634]	NA
TR35783|c0_g1_i2	1471.25	481.492	-1.61146	0.0236935	0.734213	No	NA	NA	NA	NA	NA	NA	NA
TR28256|c0_g6_i2	3666.85	1200.81	-1.61054	0.048511	0.897841	No	PREDICTED: photosystem II reaction center W protein, chloroplastic	Sesamum indicum	NA	NA	NA	NA	NA
TR38407|c1_g1_i6	59.5067	19.4936	-1.61005	0.0386952	0.846332	No	NA	NA	NA	NA	NA	NA	NA
TR43404|c1_g4_i2	59.5067	19.4936	-1.61005	0.0386952	0.846658	No	NA	NA	NA	NA	NA	NA	NA
TR7987|c0_g5_i3	59.5067	19.4936	-1.61005	0.0386952	0.846984	No	PREDICTED: protein BPS1, chloroplastic-like	Sesamum indicum	NA	NA	NA	NA	NA
TR29322|c0_g2_i1	59.5067	19.4936	-1.61005	0.0386952	0.84731	No	PREDICTED: uncharacterized protein LOC105161915	Sesamum indicum	NA	NA	NA	NA	NA
TR3242|c0_g2_i3	178.52	58.4808	-1.61005	0.0326185	0.806953	No	PREDICTED: vesicle-associated protein 1-1	Sesamum indicum	NA	NA	NA	NA	NA
TR3915|c1_g2_i2	178.52	58.4808	-1.61005	0.0326185	0.807304	No	hypothetical protein MIMGU_mgv1a011356mg	Mimulus guttatus	NA	proteolysis[GO:0006508]	ATP-dependent peptidase activity[GO:0004176]	NA	NA
TR34945|c0_g1_i1	1504.08	493.188	-1.60868	0.024239	0.73744	No	PREDICTED: 7-deoxyloganetic acid glucosyltransferase-like	Sesamum indicum	NA	NA	NA	NA	NA
TR31276|c0_g1_i1	172.364	56.5314	-1.60834	0.033359	0.81744	No	PREDICTED: uncharacterized protein LOC105164037	Sesamum indicum	NA	NA	NA	NA	NA
TR32823|c0_g5_i1	172.364	56.5314	-1.60834	0.033359	0.817088	No	PREDICTED: protein YLS3-like	Sesamum indicum	NA	NA	NA	NA	NA
TR3435|c2_g8_i1	172.364	56.5314	-1.60834	0.033359	0.816736	No	hypothetical protein MIMGU_mgv1a026895mg	Mimulus guttatus	NA	NA	NA	NA	NA
TR31994|c0_g2_i5	2115.57	693.972	-1.6081	0.0307725	0.800326	No	PREDICTED: protein THYLAKOID FORMATION1, chloroplastic	Sesamum indicum	NA	NA	NA	NA	NA
TR32213|c0_g8_i6	112.858	37.0378	-1.60743	0.0400312	0.851616	No	PREDICTED: uncharacterized protein LOC105180257	Sesamum indicum	NA	NA	NA	NA	NA
TR37080|c0_g1_i2	219.559	72.1263	-1.60601	0.0293957	0.790207	No	PREDICTED: probable aldo-keto reductase 2 isoform X1	Sesamum indicum	NA	NA	NA	NA	NA
TR38005|c0_g1_i3	1091.64	358.682	-1.60572	0.0211	0.715095	No	PREDICTED: BTB/POZ domain-containing protein At2g30600	Sesamum indicum	NA	NA	NA	NA	NA
TR37483|c1_g2_i2	106.702	35.0885	-1.60452	0.0410254	0.8583	No	PREDICTED: transcription factor bHLH104	Sesamum indicum	NA	NA	NA	NA	NA
TR37092|c3_g2_i2	53.3509	17.5442	-1.60452	0.0362449	0.839278	No	beta-tubulin, partial	Ammopiptanthus mongolicus	NA	microtubule-based process[GO:0007017]	structural constituent of cytoskeleton[GO:0005200] ; GTP binding[GO:0005525]	microtubule[GO:0005874]	NA
TR42798|c0_g3_i1	53.3509	17.5442	-1.60452	0.0362449	0.83962	No	PREDICTED: uncharacterized protein LOC105160403	Sesamum indicum	NA	NA	NA	NA	NA
TR26868|c0_g2_i3	2287.93	752.453	-1.60437	0.0331118	0.813839	No	PREDICTED: photosystem I subunit O	Sesamum indicum	NA	NA	NA	NA	NA
TR34959|c0_g1_i3	313.949	103.316	-1.60347	0.0245632	0.740559	No	PREDICTED: probable mitochondrial chaperone bcs1	Nicotiana sylvestris	NA	NA	NA	NA	NA
TR37824|c0_g2_i4	467.846	153.999	-1.60311	0.0210381	0.716416	No	PREDICTED: cytochrome c-type biogenesis ccda-like chloroplastic protein	Sesamum indicum	NA	NA	NA	NA	NA
TR7793|c1_g4_i7	361.144	118.911	-1.60269	0.0232117	0.729635	No	PREDICTED: uncharacterized protein LOC105158789	Sesamum indicum	NA	NA	NA	NA	NA
TR30633|c0_g1_i1	408.339	134.506	-1.6021	0.0221406	0.725263	No	PREDICTED: uncharacterized protein LOC105161748	Sesamum indicum	NA	NA	NA	NA	NA
TR34349|c0_g1_i1	254.443	83.8224	-1.60193	0.0273209	0.767105	No	PREDICTED: uncharacterized protein LOC105174809	Sesamum indicum	NA	NA	NA	NA	NA
TR37149|c1_g3_i5	100.546	33.1391	-1.60125	0.0419537	0.860604	No	PREDICTED: probable GTP diphosphokinase RSH2, chloroplastic isoform X2	Sesamum indicum	NA	NA	NA	NA	NA
TR41188|c0_g3_i1	100.546	33.1391	-1.60125	0.0419537	0.859673	No	PREDICTED: uncharacterized protein LOC105178685	Sesamum indicum	NA	NA	NA	NA	NA
TR41572|c0_g4_i2	100.546	33.1391	-1.60125	0.0419537	0.859983	No	NA	NA	NA	NA	NA	NA	NA
TR41624|c0_g3_i3	100.546	33.1391	-1.60125	0.0419537	0.860293	No	NA	NA	NA	NA	NA	NA	NA
TR31333|c0_g1_i1	449.379	148.151	-1.60086	0.021485	0.717863	No	PREDICTED: copper transport protein CCH-like	Sesamum indicum	NA	NA	NA	NA	NA
TR34379|c0_g2_i1	597.119	196.885	-1.60066	0.020137	0.70086	No	NA	NA	NA	NA	NA	NA	NA
TR36728|c0_g6_i2	845.406	278.758	-1.60063	0.0202073	0.702015	No	hypothetical protein MIMGU_mgv1a010637mg	Mimulus guttatus	NA	regulation of transcription, DNA-templated[GO:0006355]	protein dimerization activity[GO:0046983] ; transcription factor activity, sequence-specific DNA binding[GO:0003700]	nucleus[GO:0005634]	NA
TR42100|c0_g2_i6	147.741	48.734	-1.60007	0.0366427	0.842991	No	NA	NA	NA	NA	NA	NA	NA
TR39049|c0_g14_i9	342.677	113.063	-1.59972	0.0239721	0.735623	No	PREDICTED: xyloglucan endotransglucosylase/hydrolase protein 24-like isoform X1	Sesamum indicum	NA	NA	NA	NA	NA
TR34967|c0_g1_i4	531.457	175.442	-1.59896	0.0206517	0.707927	No	PREDICTED: mechanosensitive ion channel protein 2, chloroplastic-like	Sesamum indicum	NA	NA	NA	NA	NA
TR31602|c0_g1_i3	336.521	111.113	-1.59866	0.024244	0.737195	No	hypothetical protein MIMGU_mgv1a014308mg	Mimulus guttatus	NA	NA	NA	NA	NA
TR39905|c0_g3_i2	1346.08	444.454	-1.59866	0.0236543	0.733799	No	hypothetical protein MIMGU_mgv1a005512mg	Mimulus guttatus	NA	carbohydrate phosphorylation[GO:0046835] ; D-ribose metabolic process[GO:0006014]	ribokinase activity[GO:0004747]	NA	map00030:Pentose phosphate pathway(deoxyribokinase[ec:2.7.1.15])
TR32315|c1_g3_i3	94.39	31.1897	-1.59756	0.0427594	0.86742	No	NA	NA	NA	NA	NA	NA	NA
TR3741|c3_g1_i1	47.195	15.5949	-1.59756	0.0319287	0.801762	No	PREDICTED: ethylene-responsive transcription factor RAP2-4	Sesamum indicum	NA	NA	NA	NA	NA
TR40525|c0_g2_i6	47.195	15.5949	-1.59756	0.0319287	0.802116	No	NA	NA	NA	NA	NA	NA	NA
TR41962|c1_g1_i1	47.195	15.5949	-1.59756	0.0319287	0.802471	No	predicted protein	Hordeum vulgare subsp. vulgare	NA	metabolic process[GO:0008152]	catalytic activity[GO:0003824]	NA	NA
TR32904|c0_g3_i1	47.195	15.5949	-1.59756	0.0319287	0.801407	No	NA	NA	NA	NA	NA	NA	NA
TR2768|c1_g3_i2	7680.47	2538.07	-1.59747	0.100528	1.03726	No	PREDICTED: heat shock cognate 70 kDa protein 2-like	Sesamum indicum	NA	NA	NA	NA	NA
TR2701|c2_g1_i1	3008.17	994.173	-1.59732	0.0424013	0.864167	No	PREDICTED: uncharacterized protein LOC105177873	Sesamum indicum	NA	NA	NA	NA	NA
TR38459|c0_g2_i2	365.248	120.86	-1.59554	0.0236807	0.734219	No	PREDICTED: uncharacterized protein LOC105165277 isoform X2	Sesamum indicum	NA	NA	NA	NA	NA
TR28264|c0_g4_i1	311.897	103.316	-1.59401	0.0254312	0.75118	No	unnamed protein product	Coffea canephora	NA	translation[GO:0006412]	structural constituent of ribosome[GO:0003735]	ribosome[GO:0005840]	NA
TR35227|c1_g2_i6	1512.29	500.985	-1.5939	0.02563	0.752744	No	PREDICTED: dehydration-responsive protein RD22	Sesamum indicum	NA	NA	NA	NA	NA
TR36326|c1_g5_i1	88.2341	29.2404	-1.59337	0.0433921	0.863903	No	NA	NA	NA	NA	NA	NA	NA
TR39964|c0_g4_i1	264.702	87.7211	-1.59337	0.0274942	0.769308	No	PREDICTED: nudix hydrolase 8-like isoform X3	Sesamum indicum	NA	NA	NA	NA	NA
TR38618|c0_g2_i6	129.273	42.8859	-1.59185	0.0398046	0.851257	No	hypothetical protein MIMGU_mgv1a003219mg	Mimulus guttatus	NA	amino acid transmembrane transport[GO:0003333]	amino acid transmembrane transporter activity[GO:0015171]	integral component of membrane[GO:0016021]	NA
TR35804|c0_g2_i4	129.273	42.8859	-1.59185	0.0398046	0.851578	No	hypothetical protein MIMGU_mgv1a012620mg	Mimulus guttatus	NA	transport[GO:0006810]	transporter activity[GO:0005215]	integral component of membrane[GO:0016021]	NA
TR32829|c0_g3_i1	1797.51	596.504	-1.5914	0.0288953	0.786054	No	hypothetical protein MIMGU_mgv1a010985mg	Mimulus guttatus	NA	carbohydrate metabolic process[GO:0005975] ; malate metabolic process[GO:0006108] ; tricarboxylic acid cycle[GO:0006099]	L-malate dehydrogenase activity[GO:0030060]	NA	map00630:Glyoxylate and dicarboxylate metabolism(dehydrogenase[ec:1.1.1.37]) ; map01130:Biosynthesis of antibiotics(dehydrogenase[ec:1.1.1.37]) ; map00720:Carbon fixation pathways in prokaryotes(dehydrogenase[ec:1.1.1.37]) ; map00020:Citrate cycle (TCA cycle)(dehydrogenase[ec:1.1.1.37]) ; map00620:Pyruvate metabolism(dehydrogenase[ec:1.1.1.37]) ; map00270:Cysteine and methionine metabolism(dehydr…
TR31705|c0_g2_i1	299.586	99.4173	-1.5914	0.0260889	0.751458	No	NA	NA	NA	NA	NA	NA	NA
TR38758|c0_g2_i3	299.586	99.4173	-1.5914	0.0260889	0.751839	No	PREDICTED: lecithin-cholesterol acyltransferase-like 1	Sesamum indicum	NA	NA	NA	NA	NA
TR25770|c0_g1_i1	634.055	210.531	-1.59058	0.0207727	0.710362	No	glycine-rich protein 1	Boea hygrometrica	NA	NA	NA	NA	NA
TR33439|c0_g6_i2	252.391	83.8224	-1.59025	0.0285044	0.784816	No	hypothetical protein MIMGU_mgv1a012019mg	Mimulus guttatus	NA	photosynthesis, light harvesting[GO:0009765] ; protein-chromophore linkage[GO:0018298]	metal ion binding[GO:0046872] ; chlorophyll binding[GO:0016168]	photosystem II[GO:0009523] ; integral component of membrane[GO:0016021] ; chloroplast[GO:0009507] ; photosystem I[GO:0009522]	NA
TR38476|c0_g3_i2	252.391	83.8224	-1.59025	0.0285044	0.785197	No	PREDICTED: protein TRIGALACTOSYLDIACYLGLYCEROL 4, chloroplastic isoform X3	Sesamum indicum	NA	NA	NA	NA	NA
TR32222|c1_g1_i1	82.0783	27.291	-1.58857	0.0440503	0.869389	No	PREDICTED: cell division topological specificity factor homolog, chloroplastic-like	Sesamum indicum	NA	NA	NA	NA	NA
TR35661|c0_g2_i1	82.0783	27.291	-1.58857	0.0440503	0.869993	No	CADH1_OCIBARecName: Full=Cinnamyl alcohol dehydrogenase 1; Short=CAD 1; Short=ObaCAD1	Ocimum basilicum	Lamiaceae	phenylpropanoid biosynthetic process[GO:0009699] ; oxidation-reduction process[GO:0055114]	cinnamyl-alcohol dehydrogenase activity[GO:0045551] ; zinc ion binding[GO:0008270] ; sinapyl alcohol dehydrogenase activity[GO:0052747]	NA	map00940:Phenylpropanoid biosynthesis(dehydrogenase[ec:1.1.1.195])
TR41130|c1_g3_i3	82.0783	27.291	-1.58857	0.0440503	0.869087	No	PREDICTED: cytochrome P450 704C1-like	Sesamum indicum	NA	NA	NA	NA	NA
TR43912|c1_g1_i2	82.0783	27.291	-1.58857	0.0440503	0.869691	No	NA	NA	NA	NA	NA	NA	NA
TR37154|c0_g2_i4	123.117	40.9365	-1.58857	0.0409778	0.85762	No	PREDICTED: protein TRIGALACTOSYLDIACYLGLYCEROL 1, chloroplastic-like	Sesamum indicum	NA	NA	NA	NA	NA
TR43139|c1_g5_i1	123.117	40.9365	-1.58857	0.0409778	0.857936	No	PREDICTED: amidase 1 isoform X1	Sesamum indicum	NA	NA	NA	NA	NA
TR34481|c1_g3_i1	164.157	54.582	-1.58857	0.0361959	0.840197	No	PREDICTED: uncharacterized protein LOC105170479	Sesamum indicum	NA	NA	NA	NA	NA
TR36026|c0_g1_i6	164.157	54.582	-1.58857	0.0361959	0.839853	No	PREDICTED: sterol 14-demethylase-like	Sesamum indicum	NA	NA	NA	NA	NA
TR28846|c0_g2_i1	41.0391	13.6455	-1.58857	0.0259928	0.750213	No	hypothetical protein PRUPE_ppa013592mg	Prunus persica	NA	RNA processing[GO:0006396]	NA	NA	NA
TR3524|c0_g3_i8	41.0391	13.6455	-1.58857	0.0259928	0.750595	No	NA	NA	NA	NA	NA	NA	NA
TR35834|c0_g2_i6	41.0391	13.6455	-1.58857	0.0259928	0.751359	No	PREDICTED: thioredoxin domain-containing protein 9 homolog	Sesamum indicum	NA	NA	NA	NA	NA
TR38707|c0_g1_i1	41.0391	13.6455	-1.58857	0.0259928	0.751741	No	JHL06B08.5	Jatropha curcas	NA	metabolic process[GO:0008152]	transferase activity, transferring hexosyl groups[GO:0016758]	NA	NA
TR44145|c1_g1_i5	41.0391	13.6455	-1.58857	0.0259928	0.750977	No	PREDICTED: probable cyclic nucleotide-gated ion channel 20, chloroplastic isoform X2	Sesamum indicum	NA	NA	NA	NA	NA
TR40035|c0_g1_i3	328.313	109.164	-1.58857	0.0253519	0.749617	No	PREDICTED: uncharacterized protein LOC105177096 isoform X4	Sesamum indicum	NA	NA	NA	NA	NA
TR37718|c1_g2_i3	492.47	163.746	-1.58857	0.0218335	0.724818	No	hypothetical protein MIMGU_mgv1a007287mg	Mimulus guttatus	NA	NA	NA	NA	NA
TR35255|c2_g2_i1	1733.9	577.01	-1.58735	0.0285841	0.78473	No	hypothetical protein L484_015572	Morus notabilis	NA	photosynthesis, light harvesting[GO:0009765] ; protein-chromophore linkage[GO:0018298]	metal ion binding[GO:0046872] ; chlorophyll binding[GO:0016168]	photosystem II[GO:0009523] ; integral component of membrane[GO:0016021] ; chloroplast[GO:0009507] ; photosystem I[GO:0009522]	NA
TR36328|c1_g2_i8	562.236	187.138	-1.58707	0.0213395	0.717645	No	PREDICTED: protein disulfide isomerase-like 2-3	Sesamum indicum	NA	NA	NA	NA	NA
TR42149|c0_g2_i10	474.002	157.898	-1.5859	0.0222812	0.726936	No	PREDICTED: G-type lectin S-receptor-like serine/threonine-protein kinase At4g27290	Erythranthe guttatus	NA	NA	NA	NA	NA
TR28528|c0_g1_i2	1380.97	460.049	-1.58582	0.0250948	0.747855	No	PREDICTED: calcium-binding protein PBP1	Sesamum indicum	NA	NA	NA	NA	NA
TR35099|c0_g1_i3	192.884	64.3288	-1.5842	0.0338914	0.822677	No	PREDICTED: uncharacterized protein LOC105164990 isoform X1	Sesamum indicum	NA	NA	NA	NA	NA
TR36884|c0_g1_i1	192.884	64.3288	-1.5842	0.0338914	0.822326	No	PREDICTED: U-box domain-containing protein 26-like	Sesamum indicum	NA	NA	NA	NA	NA
TR42097|c1_g4_i1	385.768	128.658	-1.5842	0.024091	0.734117	No	unnamed protein product	Coffea canephora	NA	NA	NA	NA	NA
TR25193|c0_g1_i1	75.9224	25.3417	-1.58301	0.0446966	0.871845	No	PREDICTED: uncharacterized protein LOC104098575	Nicotiana tomentosiformis	NA	NA	NA	NA	NA
TR39631|c0_g8_i1	75.9224	25.3417	-1.58301	0.0446966	0.871546	No	NA	NA	NA	NA	NA	NA	NA
TR41722|c0_g3_i8	75.9224	25.3417	-1.58301	0.0446966	0.871247	No	NA	NA	NA	NA	NA	NA	NA
TR27528|c0_g1_i2	490.418	163.746	-1.58255	0.0223335	0.726139	No	PREDICTED: polyubiquitin isoform X1	Pyrus x bretschneideri	NA	NA	NA	NA	NA
TR38133|c1_g1_i7	262.65	87.7211	-1.58215	0.0286374	0.785433	No	PREDICTED: RING finger and CHY zinc finger domain-containing protein 1-like	Sesamum indicum	NA	NA	NA	NA	NA
TR44290|c0_g1_i1	857.718	286.556	-1.58169	0.0217174	0.722229	No	PREDICTED: uncharacterized protein LOC105166886	Sesamum indicum	NA	NA	NA	NA	NA
TR32529|c0_g1_i7	297.534	99.4173	-1.58148	0.0270451	0.763514	No	PREDICTED: uncharacterized protein LOC105162498	Sesamum indicum	NA	NA	NA	NA	NA
TR39729|c0_g3_i3	110.806	37.0378	-1.58096	0.043425	0.863953	No	PREDICTED: putative GDP-L-fucose synthase 2	Sesamum indicum	NA	NA	NA	NA	NA
TR42367|c1_g4_i4	110.806	37.0378	-1.58096	0.043425	0.864255	No	PREDICTED: outer envelope protein 80, chloroplastic isoform X2	Sesamum indicum	NA	NA	NA	NA	NA
TR2311|c0_g1_i2	110.806	37.0378	-1.58096	0.043425	0.86365	No	NA	NA	NA	NA	NA	NA	NA
TR37831|c2_g3_i3	1329.67	444.454	-1.58096	0.0250571	0.747123	No	PREDICTED: UDP-glucose 4-epimerase GEPI48	Erythranthe guttatus	NA	NA	NA	NA	NA
TR36892|c0_g2_i2	5942.47	1986.4	-1.58091	0.0819592	1.00657	No	plastid glutamine synthetase	Vigna radiata	NA	glutamine biosynthetic process[GO:0006542]	glutamate-ammonia ligase activity[GO:0004356] ; ATP binding[GO:0005524]	NA	map00220:Arginine biosynthesis(ligase[ec:6.3.1.2]) ; map00630:Glyoxylate and dicarboxylate metabolism(ligase[ec:6.3.1.2]) ; map00250:Alanine, aspartate and glutamate metabolism(ligase[ec:6.3.1.2]) ; map00910:Nitrogen metabolism(ligase[ec:6.3.1.2])
TR3126|c0_g1_i1	1567.69	524.378	-1.57997	0.0275017	0.769141	No	PREDICTED: CBS domain-containing protein CBSX1, chloroplastic	Sesamum indicum	NA	NA	NA	NA	NA
TR34818|c0_g1_i6	145.689	48.734	-1.57989	0.0391338	0.849061	No	PREDICTED: triphosphate tunel metalloenzyme 3-like	Erythranthe guttatus	NA	NA	NA	NA	NA
TR36671|c1_g1_i2	145.689	48.734	-1.57989	0.0391338	0.848737	No	PREDICTED: disease resistance protein RPM1-like isoform X1	Erythranthe guttatus	NA	NA	NA	NA	NA
TR41815|c0_g2_i1	145.689	48.734	-1.57989	0.0391338	0.849385	No	hypothetical protein B456_005G182400	Gossypium raimondii	NA	oxidation-reduction process[GO:0055114]	zinc ion binding[GO:0008270] ; oxidoreductase activity[GO:0016491]	NA	NA
TR27075|c0_g2_i2	250.339	83.8224	-1.57847	0.0297423	0.791654	No	PREDICTED: peptidyl-prolyl cis-trans isomerase CYP20-2, chloroplastic	Sesamum indicum	NA	NA	NA	NA	NA
TR40442|c1_g1_i1	250.339	83.8224	-1.57847	0.0297423	0.792025	No	lipoxygenase	Salvia miltiorrhiza	NA	oxylipin biosynthetic process[GO:0031408] ; oxidation-reduction process[GO:0055114]	metal ion binding[GO:0046872] ; oxidoreductase activity, acting on single donors with incorporation of molecular oxygen, incorporation of two atoms of oxygen[GO:0016702]	NA	NA
TR32755|c0_g1_i1	69.7665	23.3923	-1.5765	0.0451474	0.875227	No	PREDICTED: homeobox-leucine zipper protein HAT4-like	Solanum tuberosum	NA	NA	NA	NA	NA
TR33865|c1_g4_i7	69.7665	23.3923	-1.5765	0.0451474	0.875526	No	NA	NA	NA	NA	NA	NA	NA
TR35657|c0_g4_i3	69.7665	23.3923	-1.5765	0.0451474	0.875825	No	hypothetical protein MIMGU_mgv1a002165mg	Mimulus guttatus	NA	protein phosphorylation[GO:0006468]	ATP binding[GO:0005524] ; protein serine/threonine kinase activity[GO:0004674]	NA	NA
TR40069|c0_g1_i1	69.7665	23.3923	-1.5765	0.0451474	0.874928	No	NA	NA	NA	NA	NA	NA	NA
TR44749|c3_g1_i1	69.7665	23.3923	-1.5765	0.0451474	0.87463	No	hypothetical protein MIMGU_mgv1a000173mg	Mimulus guttatus	NA	NA	zinc ion binding[GO:0008270]	NA	NA
TR2564|c0_g1_i6	69.7665	23.3923	-1.5765	0.0451474	0.874332	No	ADP,ATP carrier protein, putative	Ricinus communis	NA	transport[GO:0006810]	NA	membrane[GO:0016020]	NA
TR31979|c0_g1_i2	69.7665	23.3923	-1.5765	0.0451474	0.876124	No	PREDICTED: uncharacterized protein LOC105157520	Sesamum indicum	NA	NA	NA	NA	NA
TR2773|c0_g3_i3	104.65	35.0885	-1.5765	0.0446485	0.871804	No	unnamed protein product	Vitis vinifera	NA	NA	NA	NA	NA
TR35729|c0_g1_i3	174.416	58.4808	-1.5765	0.0365275	0.842387	No	hypothetical protein MIMGU_mgv1a009348mg	Mimulus guttatus	NA	phytochromobilin biosynthetic process[GO:0010024] ; oxidation-reduction process[GO:0055114]	cobalt ion binding[GO:0050897] ; oxidoreductase activity, acting on the CH-CH group of donors, iron-sulfur protein as acceptor[GO:0016636]	NA	NA
TR7708|c1_g1_i1	418.599	140.354	-1.5765	0.0239936	0.735092	No	PREDICTED: ACT domain-containing protein DS12, chloroplastic-like isoform X2	Sesamum indicum	NA	NA	NA	NA	NA
TR39245|c0_g2_i1	34.8833	11.6962	-1.5765	0.0188387	0.69125	No	PREDICTED: uncharacterized protein LOC105168193	Sesamum indicum	NA	NA	NA	NA	NA
TR41964|c0_g1_i1	34.8833	11.6962	-1.5765	0.0188387	0.691697	No	PREDICTED: uncharacterized protein LOC105166224	Sesamum indicum	NA	NA	NA	NA	NA
TR42833|c1_g3_i1	34.8833	11.6962	-1.5765	0.0188387	0.692144	No	PREDICTED: acetyl-coenzyme A carboxylase carboxyl transferase subunit alpha, chloroplastic	Sesamum indicum	NA	NA	NA	NA	NA
TR34926|c0_g1_i3	2883	966.882	-1.57616	0.0436545	0.866394	No	hypothetical protein MIMGU_mgv1a012131mg	Mimulus guttatus	NA	cellular iron ion homeostasis[GO:0006879] ; iron ion transport[GO:0006826] ; oxidation-reduction process[GO:0055114]	ferric iron binding[GO:0008199] ; ferroxidase activity[GO:0004322]	cell[GO:0005623]	map00860:Porphyrin and chlorophyll metabolism(ceruloplasmin[ec:1.16.3.1])
TR35731|c3_g1_i1	307.794	103.316	-1.5749	0.0272659	0.766319	No	s-adenosylmethionine synthase 1, partial	Genlisea aurea	NA	S-adenosylmethionine biosynthetic process[GO:0006556]	methionine adenosyltransferase activity[GO:0004478] ; ATP binding[GO:0005524]	NA	map00270:Cysteine and methionine metabolism(adenosyltransferase[ec:2.5.1.6])
TR37612|c1_g6_i3	783.847	263.163	-1.57461	0.0220506	0.723149	No	PREDICTED: uncharacterized protein LOC105164832	Sesamum indicum	NA	NA	NA	NA	NA
TR44666|c1_g1_i3	203.144	68.2276	-1.57407	0.0339724	0.822536	No	PREDICTED: protein NLP9	Sesamum indicum	NA	NA	NA	NA	NA
TR2426|c1_g1_i2	133.377	44.8353	-1.57281	0.041513	0.86468	No	PREDICTED: pto-interacting protein 1 isoform X1	Sesamum indicum	NA	NA	NA	NA	NA
TR43910|c2_g5_i1	1229.12	413.264	-1.57249	0.0249251	0.745927	No	hypothetical protein MIMGU_mgv1a000648mg	Mimulus guttatus	NA	glycine catabolic process[GO:0006546] ; oxidation-reduction process[GO:0055114]	glycine dehydrogenase (decarboxylating) activity[GO:0004375]	NA	map00260:Glycine, serine and threonine metabolism(dehydrogenase (aminomethyl-transferring)[ec:1.4.4.2])
TR31410|c0_g3_i2	231.871	77.9744	-1.57225	0.0316775	0.803624	No	PREDICTED: 4-coumarate--CoA ligase-like 9	Erythranthe guttatus	NA	NA	NA	NA	NA
TR7688|c0_g1_i4	330.365	111.113	-1.57203	0.0267413	0.759087	No	PREDICTED: S-antigen protein-like	Sesamum indicum	NA	NA	NA	NA	NA
TR30805|c0_g1_i2	98.4939	33.1391	-1.5715	0.0458195	0.87866	No	PREDICTED: probable E3 ubiquitin-protein ligase ARI1 isoform X2	Sesamum indicum	NA	NA	NA	NA	NA
TR31605|c0_g1_i1	1290.68	434.707	-1.57002	0.025696	0.754293	No	hypothetical protein MIMGU_mgv1a014595mg	Mimulus guttatus	NA	NA	NA	NA	NA
TR42038|c1_g1_i1	225.715	76.025	-1.56996	0.0324025	0.806174	No	PREDICTED: uncharacterized protein LOC105162718	Sesamum indicum	NA	NA	NA	NA	NA
TR40483|c0_g2_i3	578.652	194.936	-1.5697	0.0226278	0.724511	No	PREDICTED: arogenate dehydratase/prephenate dehydratase 6, chloroplastic-like	Sesamum indicum	NA	NA	NA	NA	NA
TR32640|c0_g5_i4	63.6107	21.4429	-1.56877	0.0451175	0.876444	No	PREDICTED: CASP-like protein 4A3	Sesamum indicum	NA	NA	NA	NA	NA
TR37650|c2_g1_i12	63.6107	21.4429	-1.56877	0.0451175	0.876144	No	PREDICTED: protein ROOT HAIR DEFECTIVE 3 homolog 2-like	Citrus sinensis	NA	NA	NA	NA	NA
TR41362|c0_g7_i1	63.6107	21.4429	-1.56877	0.0451175	0.876743	No	hypothetical protein MIMGU_mgv1a004531mg	Mimulus guttatus	NA	oxidation-reduction process[GO:0055114]	oxidoreductase activity[GO:0016491] ; copper ion binding[GO:0005507]	NA	NA
TR41785|c0_g5_i2	474.002	159.847	-1.5682	0.0237249	0.733987	No	PREDICTED: protein DJ-1 homolog D	Sesamum indicum	NA	NA	NA	NA	NA
TR40563|c1_g1_i1	346.781	116.962	-1.56799	0.026577	0.757072	No	hypothetical protein MIMGU_mgv1a015006mg	Mimulus guttatus	NA	NA	NA	NA	NA
TR39951|c0_g1_i6	502.729	169.594	-1.5677	0.0233986	0.729854	No	PREDICTED: glucan endo-1,3-beta-glucosidase 6-like	Sesamum indicum	NA	NA	NA	NA	NA
TR42331|c0_g2_i1	687.405	231.974	-1.5672	0.0225469	0.723552	No	PREDICTED: uncharacterized protein LOC105167066	Sesamum indicum	NA	NA	NA	NA	NA
TR36920|c0_g1_i1	623.795	210.531	-1.56704	0.0226615	0.72518	No	PREDICTED: proton-coupled amino acid transporter 3-like	Sesamum indicum	NA	NA	NA	NA	NA
TR39964|c0_g1_i4	340.625	115.012	-1.5664	0.0269158	0.760999	No	PREDICTED: nudix hydrolase 8-like isoform X1	Sesamum indicum	NA	NA	NA	NA	NA
TR30923|c0_g3_i1	92.3381	31.1897	-1.56585	0.0468786	0.884048	No	PREDICTED: clustered mitochondria protein-like, partial	Erythranthe guttatus	NA	NA	NA	NA	NA
TR3146|c1_g1_i1	92.3381	31.1897	-1.56585	0.0468786	0.884342	No	PREDICTED: uncharacterized protein LOC105169660	Sesamum indicum	NA	NA	NA	NA	NA
TR38592|c1_g2_i2	92.3381	31.1897	-1.56585	0.0468786	0.883755	No	PREDICTED: dnaJ homolog 1, mitochondrial-like	Erythranthe guttatus	NA	NA	NA	NA	NA
TR33966|c1_g3_i1	92.3381	31.1897	-1.56585	0.0468786	0.884636	No	PREDICTED: probable serine/threonine-protein kinase drkD	Sesamum indicum	NA	NA	NA	NA	NA
TR38364|c4_g2_i9	92.3381	31.1897	-1.56585	0.0468786	0.883462	No	NA	NA	NA	NA	NA	NA	NA
TR38038|c0_g2_i1	184.676	62.3795	-1.56585	0.0366713	0.842965	No	PREDICTED: uncharacterized protein LOC105163785	Sesamum indicum	NA	NA	NA	NA	NA
TR3970|c0_g1_i1	277.014	93.5692	-1.56585	0.0294026	0.789643	No	PREDICTED: CBS domain-containing protein CBSX1, chloroplastic	Sesamum indicum	NA	NA	NA	NA	NA
TR41264|c0_g3_i5	242.131	81.8731	-1.56433	0.0316992	0.803458	No	PREDICTED: nephrocystin-3	Sesamum indicum	NA	NA	NA	NA	NA
TR36738|c0_g2_i5	270.858	91.6199	-1.56381	0.0299242	0.792412	No	hypothetical protein MIMGU_mgv1a011760mg	Mimulus guttatus	NA	NA	NA	NA	NA
TR34944|c1_g1_i7	149.793	50.6833	-1.56339	0.0405794	0.855904	No	ATP synthase protein I-related protein, partial	Erythranthe guttata	NA	NA	NA	NA	NA
TR37037|c1_g8_i4	149.793	50.6833	-1.56339	0.0405794	0.855586	No	PREDICTED: ras-related protein RABA5b	Sesamum indicum	NA	NA	NA	NA	NA
TR33670|c0_g3_i1	178.52	60.4301	-1.56275	0.0376486	0.842917	No	PREDICTED: peptidyl-prolyl cis-trans isomerase FKBP62	Sesamum indicum	NA	NA	NA	NA	NA
TR7443|c0_g2_i3	695.613	235.872	-1.56028	0.0231205	0.728378	No	NA	NA	NA	NA	NA	NA	NA
TR35491|c1_g4_i2	86.1822	29.2404	-1.55943	0.0478261	0.893609	No	hypothetical protein MIMGU_mgv1a012489mg	Mimulus guttatus	NA	plant-type cell wall organization[GO:0009664]	NA	extracellular region[GO:0005576] ; cell wall[GO:0005618] ; membrane[GO:0016020]	NA
TR17644|c0_g2_i2	57.4548	19.4936	-1.55943	0.0441798	0.869227	No	PREDICTED: glutamine synthetase leaf isozyme, chloroplastic	Sesamum indicum	NA	NA	NA	NA	NA
TR28876|c1_g2_i1	57.4548	19.4936	-1.55943	0.0441798	0.869829	No	hypothetical protein MIMGU_mgv1a004734mg	Mimulus guttatus	NA	glycolytic process[GO:0006096]	potassium ion binding[GO:0030955] ; pyruvate kinase activity[GO:0004743] ; magnesium ion binding[GO:0000287] ; kinase activity[GO:0016301]	NA	map01130:Biosynthesis of antibiotics(kinase[ec:2.7.1.40]) ; map00620:Pyruvate metabolism(kinase[ec:2.7.1.40]) ; map00010:Glycolysis / Gluconeogenesis(kinase[ec:2.7.1.40]) ; map00230:Purine metabolism(kinase[ec:2.7.1.40])
TR34949|c1_g6_i1	57.4548	19.4936	-1.55943	0.0441798	0.868625	No	plasma membrane H+ ATPase, partial	Populus tremula x Populus alba	NA	NA	NA	NA	NA
TR40411|c0_g1_i1	57.4548	19.4936	-1.55943	0.0441798	0.868926	No	PREDICTED: uncharacterized protein LOC105162629	Sesamum indicum	NA	NA	NA	NA	NA
TR32770|c0_g1_i3	57.4548	19.4936	-1.55943	0.0441798	0.869528	No	PREDICTED: monoacylglycerol lipase ABHD6	Sesamum indicum	NA	NA	NA	NA	NA
TR41634|c1_g2_i6	28.7274	9.74679	-1.55943	0.0112036	0.578521	No	PREDICTED: filament-like plant protein 3	Sesamum indicum	NA	NA	NA	NA	NA
TR29570|c0_g1_i3	28.7274	9.74679	-1.55943	0.0112036	0.579048	No	PREDICTED: uncharacterized protein LOC105173891	Sesamum indicum	NA	NA	NA	NA	NA
TR29730|c1_g4_i1	453.482	153.999	-1.55812	0.0249082	0.745814	No	PREDICTED: uncharacterized protein At2g27730, mitochondrial-like	Nelumbo nucifera	NA	NA	NA	NA	NA
TR34505|c0_g1_i2	396.028	134.506	-1.55793	0.0261124	0.751373	No	PREDICTED: derlin-2.2	Sesamum indicum	NA	NA	NA	NA	NA
TR38905|c1_g2_i1	763.328	259.265	-1.55788	0.0233941	0.730115	No	basic helix-loop-helix transcription factor	Salvia miltiorrhiza	NA	NA	protein dimerization activity[GO:0046983]	NA	NA
TR3421|c1_g6_i4	309.845	105.265	-1.55752	0.0288157	0.785394	No	NA	NA	NA	NA	NA	NA	NA
TR3439|c0_g2_i1	533.509	181.29	-1.55721	0.0239779	0.735403	No	unnamed protein product	Coffea canephora	NA	NA	NA	NA	NA
TR34950|c0_g2_i1	223.663	76.025	-1.55678	0.0339428	0.823223	No	PREDICTED: uncharacterized protein LOC105156285	Sesamum indicum	NA	NA	NA	NA	NA
TR43326|c0_g5_i3	418.599	142.303	-1.5566	0.0257125	0.754389	No	luminal-binding protein 5, partial	Genlisea aurea	NA	NA	ATP binding[GO:0005524]	NA	NA
TR36913|c1_g3_i6	194.936	66.2782	-1.55639	0.0366836	0.842566	No	NA	NA	NA	NA	NA	NA	NA
TR8283|c1_g1_i2	194.936	66.2782	-1.55639	0.0366836	0.842225	No	PREDICTED: GPI ethanolamine phosphate transferase 3 isoform X1	Erythranthe guttatus	NA	NA	NA	NA	NA
TR3332|c1_g1_i4	779.744	265.113	-1.55639	0.0235582	0.733221	No	PREDICTED: thylakoid lumenal 16.5 kDa protein, chloroplastic	Sesamum indicum	NA	NA	NA	NA	NA
TR37230|c0_g3_i1	137.481	46.7846	-1.55513	0.0431327	0.862366	No	NA	NA	NA	NA	NA	NA	NA
TR38217|c1_g4_i4	137.481	46.7846	-1.55513	0.0431327	0.86267	No	PREDICTED: uncharacterized protein LOC105166451	Sesamum indicum	NA	NA	NA	NA	NA
TR39120|c0_g3_i3	137.481	46.7846	-1.55513	0.0431327	0.862062	No	NA	NA	NA	NA	NA	NA	NA
TR3338|c0_g2_i2	246.235	83.8224	-1.55463	0.0323917	0.806258	No	hypothetical protein MIMGU_mgv1a012994mg	Mimulus guttatus	NA	metabolic process[GO:0008152]	hydrolase activity, acting on carbon-nitrogen (but not peptide) bonds, in linear amides[GO:0016811]	NA	NA
TR39548|c0_g1_i1	601.223	204.683	-1.55451	0.0237921	0.735665	No	PREDICTED: uncharacterized protein LOC105169457	Sesamum indicum	NA	NA	NA	NA	NA
TR31805|c0_g2_i1	217.507	74.0756	-1.55399	0.0347822	0.83291	No	PREDICTED: uncharacterized protein LOC105177934	Sesamum indicum	NA	NA	NA	NA	NA
TR26297|c0_g1_i2	1848.81	629.643	-1.55399	0.0334749	0.818161	No	hypothetical protein MIMGU_mgv1a017579mg	Mimulus guttatus	NA	NA	NA	NA	NA
TR8069|c0_g1_i2	748.964	255.366	-1.55233	0.0238437	0.73686	No	PREDICTED: RNA polymerase sigma factor sigA	Sesamum indicum	NA	NA	NA	NA	NA
TR35564|c1_g1_i2	80.0263	27.291	-1.55205	0.0488805	0.898241	No	PREDICTED: acetylornithine deacetylase	Sesamum indicum	NA	NA	NA	NA	NA
TR35670|c0_g10_i3	80.0263	27.291	-1.55205	0.0488805	0.898822	No	NA	NA	NA	NA	NA	NA	NA
TR40215|c0_g12_i1	80.0263	27.291	-1.55205	0.0488805	0.89795	No	PREDICTED: probable polygalacturonase	Sesamum indicum	NA	NA	NA	NA	NA
TR43123|c0_g6_i1	80.0263	27.291	-1.55205	0.0488805	0.898531	No	hypothetical protein EUGRSUZ_K02110	Eucalyptus grandis	NA	protein folding[GO:0006457]	NA	NA	NA
TR40656|c0_g5_i1	160.053	54.582	-1.55205	0.0407907	0.859403	No	hypothetical protein MIMGU_mgv1a005504mg	Mimulus guttatus	NA	NA	NA	integral component of membrane[GO:0016021]	NA
TR36558|c0_g4_i5	240.079	81.8731	-1.55205	0.0331131	0.81352	No	PREDICTED: putative lysine-specific demethylase JMJD5	Nicotiana tomentosiformis	NA	NA	NA	NA	NA
TR43738|c0_g1_i1	1222.97	417.163	-1.5517	0.0267985	0.75995	No	PREDICTED: protein translocase subunit SecA, chloroplastic	Erythranthe guttatus	NA	NA	NA	NA	NA
TR35488|c0_g5_i1	131.325	44.8353	-1.55044	0.0445599	0.871273	No	hypothetical protein MIMGU_mgv1a011745mg	Mimulus guttatus	NA	translation[GO:0006412]	structural constituent of ribosome[GO:0003735]	ribosome[GO:0005840]	NA
TR42504|c1_g3_i9	131.325	44.8353	-1.55044	0.0445599	0.871573	No	PREDICTED: LOW QUALITY PROTEIN: uncharacterized protein LOC105177661	Sesamum indicum	NA	NA	NA	NA	NA
TR39400|c0_g3_i4	182.624	62.3795	-1.54973	0.0387155	0.846125	No	hypothetical protein MIMGU_mgv1a024351mg	Mimulus guttatus	NA	methylation[GO:0032259]	methyltransferase activity[GO:0008168]	NA	NA
TR39026|c0_g1_i1	182.624	62.3795	-1.54973	0.0387155	0.84645	No	PREDICTED: uncharacterized protein LOC105161449	Sesamum indicum	NA	NA	NA	NA	NA
TR36313|c1_g1_i4	1095.74	374.277	-1.54973	0.025904	0.752235	No	NA	NA	NA	NA	NA	NA	NA
TR2977|c0_g2_i3	1516.4	518.529	-1.54815	0.0301463	0.79092	No	hypothetical protein MIMGU_mgv1a014729mg	Mimulus guttatus	NA	NA	NA	NA	NA
TR36535|c0_g2_i7	102.598	35.0885	-1.54793	0.0486117	0.898825	No	PREDICTED: uncharacterized protein LOC105159385	Sesamum indicum	NA	NA	NA	NA	NA
TR43463|c1_g2_i1	102.598	35.0885	-1.54793	0.0486117	0.898533	No	PREDICTED: uncharacterized protein LOC105174945	Sesamum indicum	NA	NA	NA	NA	NA
TR31119|c0_g2_i3	51.2989	17.5442	-1.54793	0.0417274	0.859687	No	unnamed protein product	Coffea canephora	NA	heme biosynthetic process[GO:0006783]	ferrochelatase activity[GO:0004325]	NA	map00860:Porphyrin and chlorophyll metabolism(ferro-protoporphyrin chelatase[ec:4.99.1.1])
TR33263|c0_g7_i1	51.2989	17.5442	-1.54793	0.0417274	0.859999	No	NA	NA	NA	NA	NA	NA	NA
TR35040|c0_g1_i1	51.2989	17.5442	-1.54793	0.0417274	0.860623	No	NA	NA	NA	NA	NA	NA	NA
TR42694|c0_g1_i1	51.2989	17.5442	-1.54793	0.0417274	0.860311	No	hypothetical protein MIMGU_mgv1a003826mg	Mimulus guttatus	NA	NA	NA	NA	NA
TR38353|c0_g1_i5	359.092	122.81	-1.54793	0.0280517	0.776492	No	PREDICTED: uncharacterized protein LOC105174419	Sesamum indicum	NA	NA	NA	NA	NA
TR39353|c0_g3_i1	455.534	155.949	-1.54649	0.0259066	0.751927	No	PREDICTED: phosphoglycerate kinase, chloroplastic	Sesamum indicum	NA	NA	NA	NA	NA
TR41187|c0_g1_i3	176.468	60.4301	-1.54607	0.0397991	0.852102	No	PREDICTED: cytochrome P450 CYP736A12-like	Sesamum indicum	NA	NA	NA	NA	NA
TR34290|c0_g1_i1	176.468	60.4301	-1.54607	0.0397991	0.851781	No	hypothetical protein VITISV_023640	Vitis vinifera	NA	NA	NA	NA	NA
TR8262|c2_g7_i3	125.169	42.8859	-1.54531	0.0460849	0.878708	No	PREDICTED: proton pump-interactor 1-like	Sesamum indicum	NA	NA	NA	NA	NA
TR32352|c0_g1_i2	751.016	257.315	-1.54531	0.0244627	0.741467	No	PREDICTED: embryogenesis-associated protein EMB8	Sesamum indicum	NA	NA	NA	NA	NA
TR35104|c1_g3_i1	346.781	118.911	-1.54414	0.0288051	0.785482	No	PREDICTED: cysteine synthase, chloroplastic/chromoplastic isoform X1	Sesamum indicum	NA	NA	NA	NA	NA
TR33839|c1_g1_i3	863.874	296.303	-1.54375	0.0249711	0.746124	No	PREDICTED: polyphenol oxidase I, chloroplastic-like	Sesamum indicum	NA	NA	NA	NA	NA
TR28627|c0_g3_i1	73.8704	25.3417	-1.54349	0.0499475	0.896387	No	PREDICTED: putative RNA-binding protein Luc7-like 1 isoform X2	Sesamum indicum	NA	NA	NA	NA	NA
TR29274|c3_g2_i2	73.8704	25.3417	-1.54349	0.0499475	0.895538	No	unknown	Medicago truncatula	NA	translation[GO:0006412]	structural constituent of ribosome[GO:0003735]	ribosome[GO:0005840]	NA
TR41584|c1_g2_i2	73.8704	25.3417	-1.54349	0.0499475	0.895821	No	PREDICTED: replication protein A 70 kDa DNA-binding subunit B	Nicotiana tomentosiformis	NA	NA	NA	NA	NA
TR43277|c3_g1_i2	73.8704	25.3417	-1.54349	0.0499475	0.896104	No	NA	NA	NA	NA	NA	NA	NA
TR3729|c0_g2_i2	147.741	50.6833	-1.54349	0.0432651	0.862886	No	hypothetical protein MIMGU_mgv1a014411mg	Mimulus guttatus	NA	translation[GO:0006412]	structural constituent of ribosome[GO:0003735]	ribosome[GO:0005840]	NA
TR29567|c0_g2_i1	221.611	76.025	-1.54349	0.03556	0.834991	No	NA	NA	NA	NA	NA	NA	NA
TR3584|c0_g3_i2	221.611	76.025	-1.54349	0.03556	0.834646	No	PREDICTED: major pollen allergen Lol p 11-like	Sesamum indicum	NA	NA	NA	NA	NA
TR7934|c3_g1_i5	221.611	76.025	-1.54349	0.03556	0.834301	No	PREDICTED: calcium-dependent protein kinase SK5, partial	Sesamum indicum	NA	NA	NA	NA	NA
TR33622|c0_g5_i6	170.312	58.4808	-1.54215	0.0409254	0.861282	No	NA	NA	NA	NA	NA	NA	NA
TR38722|c1_g6_i3	363.196	124.759	-1.54161	0.0285316	0.785186	No	PREDICTED: protein TRIGALACTOSYLDIACYLGLYCEROL 2, chloroplastic	Sesamum indicum	NA	NA	NA	NA	NA
TR30775|c0_g1_i3	96.442	33.1391	-1.54113	0.0500653	0.894263	No	PREDICTED: CCR4-NOT transcription complex subunit 1 isoform X1	Sesamum indicum	NA	NA	NA	NA	NA
TR32849|c1_g1_i1	96.442	33.1391	-1.54113	0.0500653	0.894545	No	PREDICTED: 60S ribosomal protein L2, mitochondrial-like	Solanum lycopersicum	NA	cytoplasmic translation[GO:0002181] ; mitochondrial translation[GO:0032543]	RNA binding[GO:0003723] ; structural constituent of ribosome[GO:0003735] ; transferase activity[GO:0016740]	mitochondrial large ribosomal subunit[GO:0005762]	NA
TR41712|c0_g4_i1	311.897	107.215	-1.54057	0.0304029	0.79618	No	PREDICTED: dolichyl-diphosphooligosaccharide--protein glycosyltransferase subunit 2	Sesamum indicum	NA	NA	NA	NA	NA
TR34647|c1_g10_i1	527.353	181.29	-1.54047	0.0255056	0.751814	No	alpha-amylase	Plantago major	NA	carbohydrate metabolic process[GO:0005975]	alpha-amylase activity[GO:0004556] ; calcium ion binding[GO:0005509]	NA	map00500:Starch and sucrose metabolism(glycogenase[ec:3.2.1.1])
TR33116|c0_g2_i6	215.455	74.0756	-1.54032	0.0364767	0.841556	No	NA	NA	NA	NA	NA	NA	NA
TR43228|c0_g2_i4	833.094	286.556	-1.53966	0.0252108	0.749344	No	PREDICTED: uncharacterized protein LOC105163678	Sesamum indicum	NA	NA	NA	NA	NA
TR37131|c0_g2_i2	5021.14	1727.13	-1.53964	0.0779119	0.989375	No	PREDICTED: glyceraldehyde-3-phosphate dehydrogenase A, chloroplastic	Nicotiana sylvestris	NA	NA	NA	NA	NA
TR37779|c0_g1_i3	141.585	48.734	-1.53867	0.0446724	0.871672	No	hypothetical protein MIMGU_mgv1a011593mg	Mimulus guttatus	NA	NA	NA	NA	NA
TR32904|c0_g1_i6	566.34	194.936	-1.53867	0.0253669	0.74967	No	PREDICTED: translation initiation factor IF-2, chloroplastic isoform X2	Sesamum indicum	NA	NA	NA	NA	NA
TR3459|c0_g1_i3	469.898	161.797	-1.53816	0.0264309	0.754804	No	PREDICTED: tropinone reductase homolog	Sesamum indicum	NA	NA	NA	NA	NA
TR34303|c1_g3_i1	328.313	113.063	-1.53795	0.0300519	0.788808	No	unnamed protein product	Coffea canephora	NA	NA	NA	NA	NA
TR34262|c0_g1_i4	186.728	64.3288	-1.5374	0.0397315	0.853228	No	hypothetical protein MIMGU_mgv1a022756mg	Mimulus guttatus	NA	NA	binding[GO:0005488]	NA	NA
TR37246|c0_g1_i4	1493.82	514.631	-1.5374	0.0310341	0.800531	No	PREDICTED: protein TIC 62, chloroplastic	Sesamum indicum	NA	NA	NA	NA	NA
TR41983|c1_g7_i2	1208.6	417.163	-1.53466	0.0283393	0.782547	No	PREDICTED: RNA polymerase sigma factor sigB isoform X2	Sesamum indicum	NA	NA	NA	NA	NA
TR41126|c0_g2_i7	886.445	306.049	-1.53427	0.0259535	0.752134	No	PREDICTED: folylpolyglutamate synthase	Sesamum indicum	NA	NA	NA	NA	NA
TR26460|c0_g1_i1	90.2861	31.1897	-1.53343	0.0514237	0.895713	No	PREDICTED: probably inactive leucine-rich repeat receptor-like protein kinase At3g28040	Sesamum indicum	NA	NA	NA	NA	NA
TR28997|c0_g2_i1	67.7146	23.3923	-1.53343	0.0508235	0.893478	No	PREDICTED: anthocyanidin 3-O-glucosyltransferase 2-like	Sesamum indicum	NA	NA	NA	NA	NA
TR40525|c0_g2_i2	67.7146	23.3923	-1.53343	0.0508235	0.893201	No	PREDICTED: uncharacterized protein LOC105155542	Sesamum indicum	NA	NA	NA	NA	NA
TR41498|c0_g5_i3	67.7146	23.3923	-1.53343	0.0508235	0.893754	No	PREDICTED: choline/ethanolaminephosphotransferase 1	Sesamum indicum	NA	NA	NA	NA	NA
TR4095|c0_g2_i1	112.858	38.9872	-1.53343	0.0493985	0.902794	No	PREDICTED: transcription factor MYC2	Sesamum indicum	NA	NA	NA	NA	NA
TR41463|c1_g1_i2	135.429	46.7846	-1.53343	0.0461981	0.879096	No	PLAT/LH2 domain-containing lipoxygenase family protein isoform 2	Theobroma cacao	NA	lipid oxidation[GO:0034440] ; response to wounding[GO:0009611] ; jasmonic acid biosynthetic process[GO:0009695] ; negative regulation of defense response to insect[GO:1900366] ; lateral root formation[GO:0010311] ; oxylipin biosynthetic process[GO:0031408]	metal ion binding[GO:0046872] ; linoleate 9S-lipoxygenase activity[GO:1990136]	chloroplast[GO:0009507]	NA
TR42747|c1_g1_i2	135.429	46.7846	-1.53343	0.0461981	0.87939	No	PREDICTED: two-component response regulator-like APRR1 isoform X2	Sesamum indicum	NA	NA	NA	NA	NA
TR36628|c1_g1_i2	158.001	54.582	-1.53343	0.0433194	0.863666	No	chloroplast tocopherol cyclase	Sesamum indicum	NA	metabolic process[GO:0008152]	tocopherol cyclase activity[GO:0009976]	NA	NA
TR32449|c2_g3_i1	203.144	70.1769	-1.53343	0.0384735	0.846372	No	PREDICTED: PLASMODESMATA CALLOSE-BINDING PROTEIN 3	Sesamum indicum	NA	NA	NA	NA	NA
TR23132|c0_g2_i1	45.143	15.5949	-1.53343	0.0372225	0.844696	No	NA	NA	NA	NA	NA	NA	NA
TR36523|c0_g3_i1	45.143	15.5949	-1.53343	0.0372225	0.845372	No	PREDICTED: uncharacterized protein At2g39795, mitochondrial	Vitis vinifera	NA	NA	NA	mitochondrial matrix[GO:0005759]	NA
TR38748|c0_g2_i12	45.143	15.5949	-1.53343	0.0372225	0.846048	No	hypothetical protein MIMGU_mgv1a010911mg	Mimulus guttatus	NA	NA	NA	integral component of membrane[GO:0016021]	NA
TR39290|c0_g5_i1	45.143	15.5949	-1.53343	0.0372225	0.845034	No	PREDICTED: folylpolyglutamate synthase isoform X2	Sesamum indicum	NA	NA	NA	NA	NA
TR39846|c0_g4_i1	45.143	15.5949	-1.53343	0.0372225	0.84571	No	PREDICTED: vestitone reductase-like	Erythranthe guttatus	NA	NA	NA	NA	NA
TR32352|c0_g1_i1	941.848	325.543	-1.53265	0.0264206	0.756029	No	PREDICTED: embryogenesis-associated protein EMB8	Sesamum indicum	NA	NA	NA	NA	NA
TR27415|c0_g1_i2	1703.12	588.706	-1.53256	0.0340914	0.821912	No	PREDICTED: photosystem I reaction center subunit N, chloroplastic-like	Fragaria vesca subsp. vesca	NA	NA	NA	NA	NA
TR41663|c2_g13_i2	512.989	177.392	-1.53199	0.0264292	0.755134	No	PREDICTED: ruBisCO large subunit-binding protein subunit beta, chloroplastic	Sesamum indicum	NA	NA	NA	NA	NA
TR37878|c0_g1_i3	822.835	284.606	-1.53163	0.025912	0.751701	No	HSP70	Populus alba	NA	NA	NA	NA	NA
TR39353|c0_g1_i1	5798.83	2007.84	-1.53012	0.0905644	1.02046	No	PREDICTED: phosphoglycerate kinase, chloroplastic	Cucumis melo	NA	NA	NA	NA	NA
TR7843|c1_g2_i4	219.559	76.025	-1.53007	0.0372579	0.845161	No	PREDICTED: uncharacterized protein LOC105176602	Sesamum indicum	NA	NA	NA	NA	NA
TR39579|c2_g4_i1	196.988	68.2276	-1.52968	0.0395573	0.852711	No	hypothetical protein MIMGU_mgv1a010108mg	Mimulus guttatus	NA	protein phosphorylation[GO:0006468]	protein kinase activity[GO:0004672] ; ATP binding[GO:0005524]	NA	NA
TR34117|c2_g5_i6	393.976	136.455	-1.52968	0.0288177	0.784696	No	PREDICTED: auxin-responsive protein IAA27	Sesamum indicum	NA	NA	NA	NA	NA
TR3349|c0_g2_i2	697.665	241.72	-1.5292	0.0258697	0.751624	No	PREDICTED: uncharacterized protein LOC105163276	Sesamum indicum	NA	NA	NA	NA	NA
TR39432|c0_g1_i2	151.845	52.6327	-1.52857	0.0446664	0.871855	No	PREDICTED: xyloglucan 6-xylosyltransferase 2-like, partial	Sesamum indicum	NA	NA	NA	NA	NA
TR30978|c1_g1_i5	2995.86	1039.01	-1.52776	0.0521144	0.897832	No	PREDICTED: 30S ribosomal protein S17, chloroplastic	Sesamum indicum	NA	NA	NA	NA	NA
TR36836|c1_g3_i1	129.273	44.8353	-1.52772	0.047844	0.893063	No	NA	NA	NA	NA	NA	NA	NA
TR18928|c0_g1_i1	106.702	37.0378	-1.52651	0.0511572	0.895463	No	PREDICTED: L-ascorbate peroxidase 1, cytosolic-like isoform X1	Brassica rapa	NA	NA	NA	NA	NA
TR33227|c0_g1_i2	106.702	37.0378	-1.52651	0.0511572	0.895739	No	PREDICTED: uncharacterized protein LOC105140789 isoform X2	Populus euphratica	NA	NA	NA	NA	NA
TR7816|c0_g1_i4	106.702	37.0378	-1.52651	0.0511572	0.895187	No	PREDICTED: uncharacterized protein LOC105161097	Sesamum indicum	NA	NA	NA	NA	NA
TR35420|c1_g1_i1	320.105	111.113	-1.52651	0.031526	0.80229	No	PREDICTED: uncharacterized protein LOC105167721 isoform X2	Sesamum indicum	NA	NA	NA	NA	NA
TR38356|c0_g4_i3	320.105	111.113	-1.52651	0.031526	0.801931	No	PREDICTED: uncharacterized protein LOC105160330	Sesamum indicum	NA	NA	NA	NA	NA
TR28107|c0_g1_i4	572.496	198.835	-1.5257	0.0265255	0.755984	No	PREDICTED: uncharacterized protein LOC105156396	Sesamum indicum	NA	NA	NA	NA	NA
TR41459|c0_g3_i1	168.26	58.4808	-1.52466	0.043327	0.863212	No	hypothetical protein MIMGU_mgv1a004060mg	Mimulus guttatus	NA	lignin catabolic process[GO:0046274] ; oxidation-reduction process[GO:0055114]	copper ion binding[GO:0005507] ; hydroquinone:oxygen oxidoreductase activity[GO:0052716]	apoplast[GO:0048046]	NA
TR37879|c1_g1_i2	420.651	146.202	-1.52466	0.0286563	0.785571	No	PREDICTED: phosphoinositide phospholipase C 2-like	Sesamum indicum	NA	NA	NA	NA	NA
TR35515|c0_g1_i2	1417.9	493.188	-1.52355	0.0316809	0.803351	No	PREDICTED: probable plastid-lipid-associated protein 12, chloroplastic	Sesamum indicum	NA	NA	NA	NA	NA
TR2385|c0_g1_i1	521.197	181.29	-1.52353	0.0271394	0.765035	No	NA	NA	NA	NA	NA	NA	NA
TR32968|c1_g3_i4	145.689	50.6833	-1.52331	0.0461406	0.878884	No	NA	NA	NA	NA	NA	NA	NA
TR43207|c1_g4_i7	145.689	50.6833	-1.52331	0.0461406	0.879179	No	PREDICTED: protoporphyrinogen oxidase 1, chloroplastic	Sesamum indicum	NA	NA	NA	NA	NA
TR2209|c0_g3_i3	61.5587	21.4429	-1.52146	0.0511862	0.893493	No	PREDICTED: iron-sulfur assembly protein IscA, chloroplastic	Sesamum indicum	NA	NA	NA	NA	NA
TR31618|c1_g5_i1	61.5587	21.4429	-1.52146	0.0511862	0.894868	No	hypothetical protein MIMGU_mgv1a013661mg	Mimulus guttatus	NA	translation[GO:0006412]	structural constituent of ribosome[GO:0003735] ; RNA binding[GO:0003723]	small ribosomal subunit[GO:0015935]	NA
TR34380|c0_g1_i2	61.5587	21.4429	-1.52146	0.0511862	0.894593	No	PREDICTED: uncharacterized protein LOC105174762	Sesamum indicum	NA	NA	NA	NA	NA
TR36126|c0_g2_i2	61.5587	21.4429	-1.52146	0.0511862	0.894318	No	NA	NA	NA	NA	NA	NA	NA
TR37246|c0_g3_i1	61.5587	21.4429	-1.52146	0.0511862	0.894043	No	PREDICTED: protein TIC 62, chloroplastic	Sesamum indicum	NA	NA	NA	NA	NA
TR39374|c0_g6_i2	61.5587	21.4429	-1.52146	0.0511862	0.893768	No	hypothetical protein MIMGU_mgv1a011028mg	Mimulus guttatus	NA	NA	NA	NA	NA
TR35211|c0_g2_i1	61.5587	21.4429	-1.52146	0.0511862	0.895144	No	hypothetical protein MIMGU_mgv1a026946mg, partial	Mimulus guttatus	NA	metabolic process[GO:0008152]	transferase activity, transferring hexosyl groups[GO:0016758]	integral component of membrane[GO:0016021]	NA
TR24324|c0_g1_i1	123.117	42.8859	-1.52146	0.0496096	0.895986	No	Mitochondrial carnitine/acylcarnitine carrier protein, putative	Ricinus communis	NA	transport[GO:0006810]	NA	integral component of membrane[GO:0016021]	NA
TR2465|c0_g1_i2	123.117	42.8859	-1.52146	0.0496096	0.896271	No	NA	NA	NA	NA	NA	NA	NA
TR3956|c0_g4_i5	8283.75	2888.95	-1.51974	0.127023	1.07832	No	PREDICTED: plastocyanin-like	Sesamum indicum	NA	NA	NA	NA	NA
TR35936|c0_g2_i3	100.546	35.0885	-1.51879	0.0529489	0.906435	No	PREDICTED: putative aconitate hydratase, cytoplasmic	Sesamum indicum	NA	NA	NA	NA	NA
TR38370|c1_g3_i6	100.546	35.0885	-1.51879	0.0529489	0.906708	No	PREDICTED: probable protein S-acyltransferase 7	Sesamum indicum	NA	NA	NA	NA	NA
TR8143|c4_g1_i1	201.092	70.1769	-1.51879	0.0404385	0.854518	No	PREDICTED: transcription factor JUNGBRUNNEN 1	Sesamum indicum	NA	NA	NA	NA	NA
TR33932|c1_g1_i1	402.184	140.354	-1.51879	0.0296879	0.791691	No	PREDICTED: serine carboxypeptidase-like 50	Sesamum indicum	NA	NA	NA	NA	NA
TR34481|c1_g3_i3	418.599	146.202	-1.51761	0.0294042	0.789313	No	PREDICTED: uncharacterized protein LOC105170479	Sesamum indicum	NA	NA	NA	NA	NA
TR28938|c2_g1_i1	558.132	194.936	-1.51761	0.0273916	0.768331	No	PREDICTED: peptidyl-prolyl cis-trans isomerase FKBP19, chloroplastic	Sesamum indicum	NA	NA	NA	NA	NA
TR17067|c0_g1_i1	178.52	62.3795	-1.51694	0.0431665	0.861828	No	60S ribosomal protein L34	Zea mays	NA	translation[GO:0006412]	structural constituent of ribosome[GO:0003735]	ribosome[GO:0005840]	NA
TR3071|c0_g8_i1	178.52	62.3795	-1.51694	0.0431665	0.862131	No	unnamed protein product	Coffea canephora	NA	NA	heme binding[GO:0020037] ; metal ion binding[GO:0046872]	integral component of membrane[GO:0016021]	NA
TR41451|c2_g1_i10	217.507	76.025	-1.51652	0.0390406	0.850611	No	PREDICTED: uncharacterized protein LOC104239662	Nicotiana sylvestris	NA	NA	NA	NA	NA
TR26901|c0_g1_i1	2987.65	1044.86	-1.51571	0.0538933	0.915977	No	hypothetical protein MIMGU_mgv1a014456mg	Mimulus guttatus	NA	NA	NA	NA	NA
TR33057|c0_g1_i5	373.456	130.607	-1.51571	0.0308084	0.798333	No	PREDICTED: nudix hydrolase 18, mitochondrial-like	Sesamum indicum	NA	NA	NA	NA	NA
TR44801|c2_g3_i1	77.9744	27.291	-1.51457	0.0543051	0.919947	No	PREDICTED: clustered mitochondria protein	Sesamum indicum	NA	NA	NA	NA	NA
TR33881|c0_g2_i3	116.962	40.9365	-1.51457	0.0514908	0.895783	No	PREDICTED: succinyl-CoA ligase [ADP-forming] subunit beta, mitochondrial	Sesamum indicum	NA	NA	NA	NA	NA
TR42352|c0_g1_i2	116.962	40.9365	-1.51457	0.0514908	0.895508	No	hypothetical protein MIMGU_mgv1a002561mg	Mimulus guttatus	NA	blue light signaling pathway[GO:0009785]	blue light photoreceptor activity[GO:0009882]	NA	NA
TR2390|c0_g1_i3	194.936	68.2276	-1.51457	0.0416245	0.859125	No	PREDICTED: uncharacterized protein LOC104089428	Nicotiana tomentosiformis	NA	NA	NA	NA	NA
TR41621|c1_g1_i1	233.923	81.8731	-1.51457	0.0377668	0.844565	No	PREDICTED: dnaJ homolog 1, mitochondrial-like	Sesamum indicum	NA	NA	NA	NA	NA
TR17246|c0_g1_i1	38.9872	13.6455	-1.51457	0.0309742	0.799711	No	PREDICTED: protein TIME FOR COFFEE	Sesamum indicum	NA	NA	NA	NA	NA
TR3718|c0_g1_i1	38.9872	13.6455	-1.51457	0.0309742	0.801533	No	NA	NA	NA	NA	NA	NA	NA
TR39654|c0_g1_i4	38.9872	13.6455	-1.51457	0.0309742	0.801168	No	PREDICTED: uncharacterized protein LOC105159651	Sesamum indicum	NA	NA	NA	NA	NA
TR42901|c0_g2_i12	38.9872	13.6455	-1.51457	0.0309742	0.800075	No	PREDICTED: low affinity sulfate transporter 3-like	Erythranthe guttatus	NA	NA	NA	NA	NA
TR43390|c1_g6_i1	38.9872	13.6455	-1.51457	0.0309742	0.800803	No	PREDICTED: protein disulfide-isomerase-like	Sesamum indicum	NA	NA	NA	NA	NA
TR38914|c0_g5_i4	38.9872	13.6455	-1.51457	0.0309742	0.800439	No	NA	NA	NA	NA	NA	NA	NA
TR36647|c1_g5_i4	289.326	101.367	-1.51311	0.0342544	0.824792	No	NA	NA	NA	NA	NA	NA	NA
TR29363|c0_g1_i3	539.665	189.088	-1.51301	0.0279848	0.775776	No	PREDICTED: formimidoyltransferase-cyclodeaminase-like	Sesamum indicum	NA	NA	NA	NA	NA
TR40505|c0_g2_i1	211.352	74.0756	-1.51257	0.0401291	0.851783	No	cytochrome P450 CYP94A48	Salvia miltiorrhiza	NA	oxidation-reduction process[GO:0055114]	heme binding[GO:0020037] ; oxidoreductase activity, acting on paired donors, with incorporation or reduction of molecular oxygen[GO:0016705] ; monooxygenase activity[GO:0004497] ; iron ion binding[GO:0005506]	NA	NA
TR40395|c1_g1_i2	211.352	74.0756	-1.51257	0.0401291	0.851465	No	NA	NA	NA	NA	NA	NA	NA
TR42436|c0_g5_i1	556.08	194.936	-1.51229	0.0279247	0.774865	No	NA	NA	NA	NA	NA	NA	NA
TR39166|c0_g2_i5	699.717	245.619	-1.51035	0.0276757	0.769838	No	NA	NA	NA	NA	NA	NA	NA
TR41121|c0_g3_i1	3531.42	1239.79	-1.51015	0.0625658	0.948185	No	PREDICTED: zinc finger CCCH domain-containing protein 29	Sesamum indicum	NA	NA	NA	NA	NA
TR35966|c2_g1_i4	94.39	33.1391	-1.5101	0.0547312	0.923037	No	MYB-related transcription factor	Salvia miltiorrhiza	NA	NA	NA	NA	NA
TR42225|c1_g1_i6	94.39	33.1391	-1.5101	0.0547312	0.922763	No	PREDICTED: cellulose synthase-like protein G3	Sesamum indicum	NA	NA	NA	NA	NA
TR42887|c1_g4_i1	283.17	99.4173	-1.5101	0.0348961	0.834232	No	PREDICTED: zinc finger CCCH domain-containing protein 53	Sesamum indicum	NA	NA	NA	NA	NA
TR37974|c1_g1_i3	677.146	237.822	-1.50959	0.027753	0.771233	No	cytochrome P450 CYP85A1	Salvia miltiorrhiza	NA	oxidation-reduction process[GO:0055114]	heme binding[GO:0020037] ; oxidoreductase activity, acting on paired donors, with incorporation or reduction of molecular oxygen[GO:0016705] ; monooxygenase activity[GO:0004497] ; iron ion binding[GO:0005506]	NA	NA
TR31761|c2_g11_i3	449.379	157.898	-1.50894	0.0296247	0.791493	No	PREDICTED: probable plastid-lipid-associated protein 11	Sesamum indicum	NA	NA	NA	NA	NA
TR33751|c1_g1_i6	110.806	38.9872	-1.50696	0.0534785	0.911654	No	NA	NA	NA	NA	NA	NA	NA
TR3074|c0_g3_i2	110.806	38.9872	-1.50696	0.0534785	0.911381	No	PREDICTED: inositol transporter 1	Sesamum indicum	NA	NA	NA	NA	NA
TR23821|c0_g1_i1	55.4028	19.4936	-1.50696	0.0505419	0.892394	No	hypothetical protein MIMGU_mgv1a020063mg	Mimulus guttatus	NA	NA	calcium ion binding[GO:0005509]	NA	NA
TR27362|c0_g1_i4	55.4028	19.4936	-1.50696	0.0505419	0.893227	No	hypothetical protein B456_010G115800	Gossypium raimondii	NA	nucleoside metabolic process[GO:0009116]	transferase activity[GO:0016740]	NA	NA
TR31180|c0_g4_i1	55.4028	19.4936	-1.50696	0.0505419	0.891009	No	NA	NA	NA	NA	NA	NA	NA
TR40945|c1_g8_i2	55.4028	19.4936	-1.50696	0.0505419	0.892949	No	PREDICTED: uncharacterized protein LOC105160827	Sesamum indicum	NA	NA	NA	NA	NA
TR41648|c2_g3_i1	55.4028	19.4936	-1.50696	0.0505419	0.891563	No	PREDICTED: uncharacterized protein LOC105170752	Sesamum indicum	NA	NA	NA	NA	NA
TR42831|c1_g1_i4	55.4028	19.4936	-1.50696	0.0505419	0.891286	No	NA	NA	NA	NA	NA	NA	NA
TR43399|c0_g3_i1	55.4028	19.4936	-1.50696	0.0505419	0.892671	No	hypothetical protein MIMGU_mgv1a001924mg	Mimulus guttatus	NA	DNA topological change[GO:0006265]	DNA topoisomerase type II (ATP-hydrolyzing) activity[GO:0003918] ; DNA binding[GO:0003677] ; ATP binding[GO:0005524]	chromosome[GO:0005694]	NA
TR43613|c1_g3_i1	55.4028	19.4936	-1.50696	0.0505419	0.890733	No	unnamed protein product	Vitis vinifera	NA	NA	NA	NA	NA
TR32154|c0_g4_i1	55.4028	19.4936	-1.50696	0.0505419	0.892117	No	PREDICTED: protein TWIN LOV 1	Sesamum indicum	NA	NA	NA	NA	NA
TR32178|c0_g1_i1	55.4028	19.4936	-1.50696	0.0505419	0.89184	No	hypothetical protein MIMGU_mgv1a0053862mg, partial	Mimulus guttatus	NA	metabolic process[GO:0008152]	transferase activity[GO:0016740]	NA	NA
TR31410|c0_g3_i1	221.611	77.9744	-1.50696	0.0397986	0.852413	No	hypothetical protein MIMGU_mgv1a003608mg	Mimulus guttatus	NA	NA	NA	NA	NA
TR2382|c0_g1_i1	2043.75	719.313	-1.50653	0.0419431	0.860697	No	PREDICTED: uncharacterized protein LOC105163833	Sesamum indicum	NA	NA	NA	NA	NA
TR28566|c0_g1_i1	991.095	348.935	-1.50606	0.029409	0.789068	No	hypothetical protein MIMGU_mgv1a014836mg	Mimulus guttatus	NA	NA	NA	integral component of membrane[GO:0016021]	NA
TR40104|c0_g3_i4	293.43	103.316	-1.50595	0.0348669	0.833884	No	hypothetical protein MIMGU_mgv1a004519mg	Mimulus guttatus	NA	NA	NA	integral component of membrane[GO:0016021]	NA
TR43170|c0_g3_i1	531.457	187.138	-1.50585	0.0287712	0.785312	No	NA	NA	NA	NA	NA	NA	NA
TR43412|c0_g1_i5	2546.48	896.705	-1.5058	0.0491655	0.901146	No	PREDICTED: phosphomethylpyrimidine synthase, chloroplastic isoform X2	Sesamum indicum	NA	NA	NA	NA	NA
TR37694|c2_g8_i1	127.221	44.8353	-1.50463	0.0513846	0.89558	No	PREDICTED: uncharacterized protein LOC105157568	Sesamum indicum	NA	NA	NA	NA	NA
TR8164|c0_g1_i2	525.301	185.189	-1.50414	0.0290035	0.788242	No	chloroplast heat shock protein 70-2, partial	Genlisea aurea	NA	NA	ATP binding[GO:0005524]	NA	NA
TR43326|c0_g10_i2	1973.98	695.921	-1.50411	0.0412903	0.860987	No	hypothetical protein CARUB_v100065120mg, partial	Capsella rubella	NA	NA	NA	NA	NA
TR38689|c1_g1_i5	1586.16	559.466	-1.50342	0.0360613	0.839131	No	PREDICTED: cytochrome P450 83B1-like	Sesamum indicum	NA	NA	NA	NA	NA
TR40948|c3_g1_i1	71.8185	25.3417	-1.50284	0.0558848	0.923301	No	PREDICTED: LOW QUALITY PROTEIN: pyruvate kinase-like	Malus domestica	NA	NA	NA	NA	NA
TR7782|c0_g4_i1	71.8185	25.3417	-1.50284	0.0558848	0.923033	No	PREDICTED: protein TIC 22, chloroplastic	Sesamum indicum	NA	NA	NA	NA	NA
TR44143|c0_g1_i3	287.274	101.367	-1.50284	0.0355123	0.834561	No	PREDICTED: tRNA (uracil-5-)-methyltransferase homolog A	Sesamum indicum	NA	NA	NA	NA	NA
TR7456|c0_g1_i1	751.016	265.113	-1.50224	0.0285558	0.785472	No	PREDICTED: protein HEADING DATE 3A-like	Sesamum indicum	NA	NA	NA	NA	NA
TR37214|c0_g4_i1	88.2341	31.1897	-1.50027	0.0564462	0.927183	No	PREDICTED: protein LOW PSII ACCUMULATION 3, chloroplastic	Sesamum indicum	NA	NA	NA	NA	NA
TR43374|c0_g6_i1	88.2341	31.1897	-1.50027	0.0564462	0.926915	No	PREDICTED: phosphoglucomutase, chloroplastic	Sesamum indicum	NA	NA	NA	NA	NA
TR39993|c0_g1_i2	634.055	224.176	-1.49997	0.0287821	0.78523	No	PREDICTED: uncharacterized protein LOC105160078, partial	Sesamum indicum	NA	NA	NA	NA	NA
TR41462|c0_g4_i4	457.586	161.797	-1.49986	0.0304049	0.795866	No	PREDICTED: receptor-like protein kinase FERONIA	Sesamum indicum	NA	NA	NA	NA	NA
TR38713|c1_g6_i1	1317.36	465.897	-1.49956	0.0332467	0.815743	No	PREDICTED: 28 kDa ribonucleoprotein, chloroplastic-like	Sesamum indicum	NA	NA	NA	NA	NA
TR36914|c1_g6_i6	192.884	68.2276	-1.49931	0.043804	0.86724	No	hypothetical protein MIMGU_mgv1a008508mg	Mimulus guttatus	NA	proteolysis[GO:0006508]	serine-type peptidase activity[GO:0008236]	NA	NA
TR41845|c1_g5_i1	192.884	68.2276	-1.49931	0.043804	0.867542	No	PREDICTED: patellin-3-like	Sesamum indicum	NA	NA	NA	NA	NA
TR30865|c0_g2_i3	104.65	37.0378	-1.4985	0.0555563	0.925955	No	PREDICTED: uncharacterized protein LOC105155638	Sesamum indicum	NA	NA	NA	NA	NA
TR2675|c0_g2_i7	451.43	159.847	-1.49781	0.0307371	0.800136	No	unnamed protein product	Coffea canephora	NA	translation[GO:0006412]	structural constituent of ribosome[GO:0003735]	ribosome[GO:0005840]	NA
TR3729|c0_g3_i3	1056.76	374.277	-1.49747	0.0308567	0.799222	No	50S ribosomal protein L27	Morus notabilis	NA	translation[GO:0006412]	structural constituent of ribosome[GO:0003735]	ribosome[GO:0005840]	NA
TR29321|c0_g8_i1	242.131	85.7718	-1.49721	0.039148	0.84872	No	PREDICTED: uncharacterized protein LOC105178466	Sesamum indicum	NA	NA	NA	NA	NA
TR34647|c1_g1_i1	2107.36	746.604	-1.49702	0.0441615	0.870375	No	PREDICTED: probable alpha-amylase 2	Sesamum indicum	NA	NA	NA	NA	NA
TR2593|c1_g1_i1	258.547	91.6199	-1.49669	0.0379521	0.841421	No	PREDICTED: fasciclin-like arabinogalactan protein 13	Sesamum indicum	NA	NA	NA	NA	NA
TR43085|c0_g1_i4	258.547	91.6199	-1.49669	0.0379521	0.841749	No	PREDICTED: probable inactive leucine-rich repeat receptor-like protein kinase At3g03770	Sesamum indicum	NA	NA	NA	NA	NA
TR32843|c1_g2_i1	412.443	146.202	-1.49623	0.0317752	0.803591	No	unnamed protein product	Coffea canephora	NA	nucleosome assembly[GO:0006334]	DNA binding[GO:0003677]	nucleosome[GO:0000786] ; nucleus[GO:0005634]	NA
TR40405|c1_g6_i1	445.275	157.898	-1.4957	0.0310825	0.801052	No	PREDICTED: eukaryotic translation initiation factor 2A	Sesamum indicum	NA	NA	NA	NA	NA
TR3437|c0_g1_i1	153.897	54.582	-1.49546	0.0488938	0.897904	No	PREDICTED: probable glutathione S-transferase	Malus domestica	NA	NA	NA	NA	NA
TR22995|c0_g1_i2	170.312	60.4301	-1.49484	0.0470483	0.885484	No	conserved hypothetical protein	Ricinus communis	NA	NA	NA	NA	NA
TR32694|c3_g1_i6	2981.49	1058.5	-1.49401	0.0573554	0.933479	No	PREDICTED: photosystem I reaction center subunit III, chloroplastic-like	Solanum lycopersicum	NA	photosynthesis[GO:0015979]	NA	integral component of membrane[GO:0016021] ; photosystem I reaction center[GO:0009538]	NA
TR42748|c1_g1_i11	422.703	150.101	-1.49371	0.0317942	0.802285	No	hypothetical protein MIMGU_mgv1a002988mg	Mimulus guttatus	NA	NA	ATP binding[GO:0005524]	integral component of membrane[GO:0016021]	NA
TR27884|c0_g1_i1	658.678	233.923	-1.49354	0.0293962	0.789846	No	hypothetical protein B456_002G104300	Gossypium raimondii	NA	metabolic process[GO:0008152]	GTPase activity[GO:0003924] ; GTP binding[GO:0005525]	NA	NA
TR7994|c0_g1_i4	235.975	83.8224	-1.49323	0.0401637	0.85061	No	PREDICTED: probable receptor-like protein kinase At1g80640 isoform X2	Sesamum indicum	NA	NA	NA	NA	NA
TR42656|c0_g2_i2	252.391	89.6705	-1.49295	0.0388532	0.848809	No	nitric oxide-associated protein	Elaeis guineensis	NA	NA	GTP binding[GO:0005525]	NA	NA
TR32762|c0_g4_i1	301.638	107.215	-1.49231	0.0360684	0.83861	No	hypothetical protein B456_009G262000	Gossypium raimondii	NA	photosynthesis, light harvesting[GO:0009765] ; protein-chromophore linkage[GO:0018298]	chlorophyll binding[GO:0016168]	photosystem II[GO:0009523] ; integral component of membrane[GO:0016021] ; chloroplast[GO:0009507]	NA
TR32950|c1_g1_i1	1588.21	565.314	-1.49028	0.0377266	0.843997	No	galactinol synthase	Salvia miltiorrhiza	NA	metabolic process[GO:0008152]	transferase activity, transferring glycosyl groups[GO:0016757]	NA	NA
TR2326|c0_g1_i8	82.0783	29.2404	-1.48904	0.0583036	0.936303	No	PREDICTED: uncharacterized protein LOC105177873	Sesamum indicum	NA	NA	NA	NA	NA
TR29381|c1_g3_i1	82.0783	29.2404	-1.48904	0.0583036	0.936038	No	PREDICTED: EPIDERMAL PATTERNING FACTOR-like protein 9	Sesamum indicum	NA	NA	NA	NA	NA
TR31092|c0_g2_i3	98.4939	35.0885	-1.48904	0.0576978	0.936101	No	NA	NA	NA	NA	NA	NA	NA
TR27228|c0_g1_i4	65.6626	23.3923	-1.48904	0.0572921	0.932983	No	NA	NA	NA	NA	NA	NA	NA
TR2756|c4_g2_i1	65.6626	23.3923	-1.48904	0.0572921	0.932716	No	NA	NA	NA	NA	NA	NA	NA
TR37954|c0_g1_i1	65.6626	23.3923	-1.48904	0.0572921	0.933251	No	NA	NA	NA	NA	NA	NA	NA
TR7244|c0_g2_i1	65.6626	23.3923	-1.48904	0.0572921	0.933519	No	hypothetical protein MIMGU_mgv1a015061mg	Mimulus guttatus	NA	NA	NA	NA	NA
TR4088|c0_g1_i2	114.91	40.9365	-1.48904	0.0555984	0.926384	No	hypothetical protein MIMGU_mgv1a003792mg	Mimulus guttatus	NA	NA	NA	NA	NA
TR38527|c3_g2_i4	131.325	46.7846	-1.48904	0.0530409	0.907737	No	NA	NA	NA	NA	NA	NA	NA
TR38602|c0_g1_i5	164.157	58.4808	-1.48904	0.048579	0.898513	No	PREDICTED: glucan 1,3-beta-glucosidase A-like	Sesamum indicum	NA	NA	NA	NA	NA
TR23965|c0_g1_i1	49.247	17.5442	-1.48904	0.0481737	0.896271	No	NA	NA	NA	NA	NA	NA	NA
TR24264|c0_g1_i1	49.247	17.5442	-1.48904	0.0481737	0.895977	No	PREDICTED: uncharacterized protein LOC105158090 isoform X2	Sesamum indicum	NA	NA	NA	NA	NA
TR31408|c0_g2_i1	49.247	17.5442	-1.48904	0.0481737	0.895684	No	PREDICTED: V-type proton ATPase subunit d1-like	Sesamum indicum	NA	NA	NA	NA	NA
TR3433|c0_g1_i2	49.247	17.5442	-1.48904	0.0481737	0.895098	No	hypothetical protein MIMGU_mgv1a015815mg	Mimulus guttatus	NA	NA	NA	NA	NA
TR19356|c0_g1_i1	49.247	17.5442	-1.48904	0.0481737	0.895391	No	NA	NA	NA	NA	NA	NA	NA
TR42599|c0_g1_i6	180.572	64.3288	-1.48904	0.0466229	0.880687	No	NA	NA	NA	NA	NA	NA	NA
TR33357|c0_g1_i4	541.717	192.987	-1.48904	0.0304143	0.795745	No	NA	NA	NA	NA	NA	NA	NA
TR19546|c0_g2_i1	32.8313	11.6962	-1.48904	0.0232618	0.7304	No	PREDICTED: probable serine/threonine-protein kinase At1g54610	Sesamum indicum	NA	NA	NA	NA	NA
TR32731|c0_g1_i1	32.8313	11.6962	-1.48904	0.0232618	0.729594	No	PREDICTED: uncharacterized protein At2g34460, chloroplastic	Sesamum indicum	NA	NA	NA	NA	NA
TR36836|c1_g3_i3	32.8313	11.6962	-1.48904	0.0232618	0.729997	No	PREDICTED: uncharacterized protein LOC105174078	Sesamum indicum	NA	NA	NA	NA	NA
TR37730|c3_g2_i1	32.8313	11.6962	-1.48904	0.0232618	0.728387	No	PREDICTED: cysteine and histidine-rich domain-containing protein RAR1-like	Sesamum indicum	NA	NA	NA	NA	NA
TR11815|c0_g1_i1	32.8313	11.6962	-1.48904	0.0232618	0.727185	No	PREDICTED: plasma membrane ATPase 4	Sesamum indicum	NA	NA	NA	NA	NA
TR31232|c2_g1_i1	32.8313	11.6962	-1.48904	0.0232618	0.727585	No	NA	NA	NA	NA	NA	NA	NA
TR37162|c0_g3_i1	32.8313	11.6962	-1.48904	0.0232618	0.729191	No	NA	NA	NA	NA	NA	NA	NA
TR42931|c0_g8_i1	32.8313	11.6962	-1.48904	0.0232618	0.727986	No	PREDICTED: probable plastid-lipid-associated protein 14, chloroplastic isoform X1	Sesamum indicum	NA	NA	NA	NA	NA
TR40452|c0_g5_i1	32.8313	11.6962	-1.48904	0.0232618	0.728789	No	PREDICTED: inositol transporter 1	Sesamum indicum	NA	NA	NA	NA	NA
TR30424|c0_g2_i1	1699.02	606.251	-1.48672	0.0397127	0.853147	No	chlorophyll A/B binding protein, putative	Ricinus communis	NA	photosynthesis, light harvesting[GO:0009765] ; protein-chromophore linkage[GO:0018298]	metal ion binding[GO:0046872] ; chlorophyll binding[GO:0016168]	photosystem II[GO:0009523] ; integral component of membrane[GO:0016021] ; chloroplast[GO:0009507] ; photosystem I[GO:0009522]	NA
TR32414|c1_g1_i3	420.651	150.101	-1.48669	0.032609	0.808478	No	hypothetical protein MIMGU_mgv1a005305mg	Mimulus guttatus	NA	NA	NA	integral component of membrane[GO:0016021]	NA
TR35104|c1_g4_i5	272.91	97.4679	-1.48543	0.0383641	0.846919	No	hypothetical protein POPTR_0013s13150g	Populus trichocarpa	NA	cysteine biosynthetic process from serine[GO:0006535]	pyridoxal phosphate binding[GO:0030170] ; cysteine synthase activity[GO:0004124] ; transferase activity[GO:0016740]	NA	map00920:Sulfur metabolism(synthase[ec:2.5.1.47]) ; map01130:Biosynthesis of antibiotics(synthase[ec:2.5.1.47]) ; map00270:Cysteine and methionine metabolism(synthase[ec:2.5.1.47])
TR44820|c0_g1_i2	785.899	280.708	-1.48528	0.0304311	0.795818	No	PREDICTED: uncharacterized protein LOC105177096 isoform X3	Sesamum indicum	NA	NA	NA	NA	NA
TR2566|c0_g1_i3	223.663	79.9237	-1.48463	0.0424015	0.863862	No	NA	NA	NA	NA	NA	NA	NA
TR40330|c0_g2_i8	207.248	74.0756	-1.48428	0.044164	0.870121	No	hypothetical protein MIMGU_mgv1a007645mg	Mimulus guttatus	NA	biosynthetic process[GO:0009058]	pyridoxal phosphate binding[GO:0030170] ; catalytic activity[GO:0003824]	NA	NA
TR43354|c0_g4_i3	190.832	68.2276	-1.48388	0.0461022	0.878741	No	PREDICTED: L-type lectin-domain containing receptor kinase VIII.2-like	Sesamum indicum	NA	NA	NA	NA	NA
TR35255|c2_g4_i1	381.664	136.455	-1.48388	0.0340051	0.822976	No	unknown	Zea mays	NA	photosynthesis, light harvesting[GO:0009765] ; protein-chromophore linkage[GO:0018298]	chlorophyll binding[GO:0016168]	photosystem II[GO:0009523] ; integral component of membrane[GO:0016021] ; chloroplast[GO:0009507]	NA
TR43864|c1_g2_i4	4409.65	1577.03	-1.48345	0.0805627	0.998482	No	hypothetical protein MIMGU_mgv1a001601mg	Mimulus guttatus	NA	metabolic process[GO:0008152]	catalytic activity[GO:0003824]	NA	NA
TR33273|c0_g1_i1	158.001	56.5314	-1.48281	0.0501932	0.895141	No	PREDICTED: carboxymethylenebutenolidase homolog	Sesamum indicum	NA	NA	NA	NA	NA
TR35316|c0_g4_i1	451.43	161.797	-1.48032	0.0326275	0.804722	No	hypothetical protein MIMGU_mgv1a012593mg	Mimulus guttatus	NA	proteolysis involved in cellular protein catabolic process[GO:0051603]	threonine-type endopeptidase activity[GO:0004298]	cytoplasm[GO:0005737] ; proteasome core complex[GO:0005839] ; nucleus[GO:0005634]	NA
TR37163|c0_g1_i9	2567	920.097	-1.48022	0.0534672	0.911736	No	4-hydroxy-3-methylbut-2-enyl diphosphate reductase 1	Salvia miltiorrhiza	NA	dimethylallyl diphosphate biosynthetic process[GO:0050992] ; isopentenyl diphosphate biosynthetic process, methylerythritol 4-phosphate pathway[GO:0019288] ; oxidation-reduction process[GO:0055114]	4-hydroxy-3-methylbut-2-en-1-yl diphosphate reductase activity[GO:0051745] ; metal ion binding[GO:0046872]	NA	NA
TR7994|c0_g1_i6	217.507	77.9744	-1.47999	0.0436318	0.866246	No	NA	NA	NA	NA	NA	NA	NA
TR3986|c0_g3_i6	201.092	72.1263	-1.47926	0.045531	0.878169	No	NA	NA	NA	NA	NA	NA	NA
TR31636|c0_g2_i1	92.3381	33.1391	-1.47839	0.059862	0.937475	No	hypothetical protein POPTR_0289s00210g, partial	Populus trichocarpa	NA	NA	NA	NA	NA
TR37362|c0_g1_i3	92.3381	33.1391	-1.47839	0.059862	0.937992	No	PREDICTED: uncharacterized protein LOC105170157 isoform X1	Sesamum indicum	NA	NA	NA	NA	NA
TR37673|c3_g3_i3	92.3381	33.1391	-1.47839	0.059862	0.937734	No	PREDICTED: probable WRKY transcription factor 13	Sesamum indicum	NA	NA	NA	NA	NA
TR34803|c0_g1_i2	184.676	66.2782	-1.47839	0.0476006	0.890861	No	PREDICTED: GDSL esterase/lipase CPRD49	Vitis vinifera	NA	NA	NA	NA	NA
TR40295|c0_g1_i4	336.521	120.86	-1.47736	0.0363572	0.839481	No	NA	NA	NA	NA	NA	NA	NA
TR44235|c0_g5_i2	336.521	120.86	-1.47736	0.0363572	0.839822	No	3R MYB protein	Rehmannia glutinosa	NA	NA	NA	NA	NA
TR29043|c0_g4_i1	748.964	269.012	-1.47723	0.0311966	0.801447	No	hypothetical protein MIMGU_mgv1a015384mg	Mimulus guttatus	NA	NA	NA	NA	NA
TR27998|c1_g3_i1	900.809	323.594	-1.47704	0.0319204	0.802616	No	PREDICTED: multiprotein-bridging factor 1a-like	Sesamum indicum	NA	NA	NA	NA	NA
TR35739|c0_g1_i2	488.366	175.442	-1.47697	0.0323498	0.806628	No	hypothetical protein MIMGU_mgv1a010363mg	Mimulus guttatus	NA	carbohydrate metabolic process[GO:0005975]	carbohydrate binding[GO:0030246] ; isomerase activity[GO:0016853]	NA	NA
TR7443|c0_g1_i1	320.105	115.012	-1.47676	0.0371058	0.845427	No	hypothetical protein MIMGU_mgv1a013647mg	Mimulus guttatus	NA	NA	NA	NA	NA
TR2945|c0_g3_i1	75.9224	27.291	-1.4761	0.0604026	0.939981	No	PREDICTED: uncharacterized protein LOC105156092	Sesamum indicum	NA	NA	NA	NA	NA
TR34562|c1_g2_i2	75.9224	27.291	-1.4761	0.0604026	0.941012	No	hypothetical protein M569_13812	Genlisea aurea	NA	NA	NA	NA	NA
TR37073|c0_g3_i1	75.9224	27.291	-1.4761	0.0604026	0.940238	No	PREDICTED: probable phytol kinase 3, chloroplastic	Sesamum indicum	NA	NA	NA	NA	NA
TR30583|c0_g1_i2	75.9224	27.291	-1.4761	0.0604026	0.941528	No	PREDICTED: multiprotein-bridging factor 1a-like	Vitis vinifera	NA	NA	DNA binding[GO:0003677]	NA	NA
TR35479|c0_g2_i1	75.9224	27.291	-1.4761	0.0604026	0.94127	No	NA	NA	NA	NA	NA	NA	NA
TR38422|c0_g1_i1	75.9224	27.291	-1.4761	0.0604026	0.940754	No	PREDICTED: uncharacterized protein LOC105162032	Sesamum indicum	NA	NA	NA	NA	NA
TR40316|c0_g2_i6	75.9224	27.291	-1.4761	0.0604026	0.940496	No	UDP-N-acetylglucosamine--dolichyl-phosphate N-acetylglucosaminephosphotransferase-like	Solanum tuberosum	NA	metabolic process[GO:0008152]	UDP-N-acetylglucosamine-dolichyl-phosphate N-acetylglucosaminephosphotransferase activity[GO:0003975] ; phospho-N-acetylmuramoyl-pentapeptide-transferase activity[GO:0008963]	integral component of membrane[GO:0016021]	map00510:N-Glycan biosynthesis(N-acetylglucosaminephosphotransferase[ec:2.7.8.15]) ; map00550:Peptidoglycan biosynthesis(MraY transferase[ec:2.7.8.13])
TR30523|c0_g1_i4	303.69	109.164	-1.4761	0.0379133	0.845509	No	PREDICTED: chaperone protein dnaJ 1, mitochondrial-like isoform X1	Sesamum indicum	NA	NA	NA	NA	NA
TR36597|c0_g2_i2	379.612	136.455	-1.4761	0.0349618	0.834747	No	PREDICTED: methyl-CpG-binding domain-containing protein 13-like	Sesamum indicum	NA	NA	NA	NA	NA
TR42782|c0_g1_i4	498.625	179.341	-1.47525	0.0323914	0.806605	No	PREDICTED: uncharacterized protein LOC105173836	Sesamum indicum	NA	NA	NA	NA	NA
TR7657|c0_g1_i1	211.352	76.025	-1.4751	0.0449423	0.874834	No	PREDICTED: uncharacterized protein At5g01610-like	Sesamum indicum	NA	NA	NA	NA	NA
TR24342|c2_g1_i1	135.429	48.734	-1.47454	0.0545922	0.922885	No	PREDICTED: F-box/LRR-repeat protein 14 isoform X2	Nicotiana sylvestris	NA	NA	NA	NA	NA
TR43191|c2_g3_i2	135.429	48.734	-1.47454	0.0545922	0.92261	No	hypothetical protein MIMGU_mgv1a0035152mg, partial	Mimulus guttatus	NA	oxidation-reduction process[GO:0055114]	oxidoreductase activity[GO:0016491] ; copper ion binding[GO:0005507]	NA	NA
TR43705|c0_g1_i9	135.429	48.734	-1.47454	0.0545922	0.922336	No	PREDICTED: protein LONGIFOLIA 1	Sesamum indicum	NA	NA	NA	NA	NA
TR29552|c0_g1_i1	4245.5	1528.3	-1.47401	0.0800611	0.995742	No	putative aldo/keto reductase 1	Salvia miltiorrhiza	NA	NA	NA	NA	NA
TR36084|c0_g3_i2	194.936	70.1769	-1.47393	0.0469834	0.884849	No	hypothetical protein CISIN_1g0242241mg, partial	Citrus sinensis	NA	NA	NA	NA	NA
TR41126|c0_g2_i2	568.392	204.683	-1.4735	0.0318913	0.802951	No	PREDICTED: folylpolyglutamate synthase	Sesamum indicum	NA	NA	NA	NA	NA
TR43188|c0_g4_i6	941.848	339.188	-1.47341	0.0326174	0.807629	No	PREDICTED: phosphoglucan, water dikinase, chloroplastic	Sesamum indicum	NA	NA	NA	NA	NA
TR22799|c0_g1_i1	59.5067	21.4429	-1.47255	0.0581668	0.935958	No	hypothetical protein MIMGU_mgv1a000140mg	Mimulus guttatus	NA	NA	NA	NA	NA
TR35041|c0_g11_i1	59.5067	21.4429	-1.47255	0.0581668	0.936223	No	PREDICTED: probable ribose-5-phosphate isomerase 3, chloroplastic	Sesamum indicum	NA	NA	NA	NA	NA
TR38633|c0_g3_i3	59.5067	21.4429	-1.47255	0.0581668	0.935692	No	PREDICTED: uncharacterized protein LOC105163644	Sesamum indicum	NA	NA	NA	NA	NA
TR39238|c0_g1_i1	119.013	42.8859	-1.47255	0.0575386	0.934854	No	PREDICTED: uncharacterized protein LOC105174161	Sesamum indicum	NA	NA	NA	NA	NA
TR19514|c0_g1_i1	178.52	64.3288	-1.47255	0.0491862	0.901234	No	PREDICTED: calcium-binding protein KIC-like	Sesamum indicum	NA	NA	NA	NA	NA
TR43095|c2_g8_i3	178.52	64.3288	-1.47255	0.0491862	0.900943	No	PREDICTED: dammarenediol II synthase-like	Sesamum indicum	NA	NA	NA	NA	NA
TR30000|c0_g1_i1	2661.39	959.085	-1.47245	0.0561807	0.925499	No	hypothetical protein MIMGU_mgv1a012601mg	Mimulus guttatus	NA	metabolic process[GO:0008152]	N-acetyltransferase activity[GO:0008080]	NA	NA
TR39353|c0_g4_i1	1719.54	619.896	-1.47192	0.0420109	0.860224	No	hypothetical protein CISIN_1g011942mg	Citrus sinensis	NA	glycolytic process[GO:0006096]	phosphoglycerate kinase activity[GO:0004618]	NA	map01130:Biosynthesis of antibiotics(kinase[ec:2.7.2.3]) ; map00710:Carbon fixation in photosynthetic organisms(kinase[ec:2.7.2.3]) ; map00010:Glycolysis / Gluconeogenesis(kinase[ec:2.7.2.3])
TR38508|c0_g1_i7	281.118	101.367	-1.47159	0.0395924	0.853145	No	PREDICTED: potassium channel SKOR-like	Sesamum indicum	NA	NA	NA	NA	NA
TR3439|c0_g2_i4	545.82	196.885	-1.47107	0.0323351	0.806617	No	PREDICTED: uncharacterized protein LOC105966158	Erythranthe guttatus	NA	NA	NA	NA	NA
TR35041|c0_g5_i2	469.898	169.594	-1.47026	0.0334072	0.816859	No	hypothetical protein MIMGU_mgv1a011534mg	Mimulus guttatus	NA	pentose-phosphate shunt, non-oxidative branch[GO:0009052]	ribose-5-phosphate isomerase activity[GO:0004751]	NA	map00030:Pentose phosphate pathway(isomerase[ec:5.3.1.6]) ; map01130:Biosynthesis of antibiotics(isomerase[ec:5.3.1.6]) ; map00051:Fructose and mannose metabolism(isomerase[ec:5.3.1.6]) ; map00710:Carbon fixation in photosynthetic organisms(isomerase[ec:5.3.1.6])
TR2514|c1_g10_i1	102.598	37.0378	-1.46993	0.0603566	0.941327	No	Scaffold attachment factor B1	Medicago truncatula	NA	NA	nucleic acid binding[GO:0003676] ; nucleotide binding[GO:0000166]	NA	NA
TR42559|c1_g2_i5	102.598	37.0378	-1.46993	0.0603566	0.941586	No	NA	NA	NA	NA	NA	NA	NA
TR35174|c0_g1_i3	205.196	74.0756	-1.46993	0.0463375	0.877924	No	PREDICTED: glucan endo-1,3-beta-glucosidase-like	Sesamum indicum	NA	NA	NA	NA	NA
TR34303|c1_g6_i1	453.482	163.746	-1.46959	0.0337967	0.821431	No	PREDICTED: protein EXORDIUM-like	Sesamum indicum	NA	NA	NA	NA	NA
TR34503|c1_g1_i1	539.665	194.936	-1.46906	0.0326155	0.808286	No	PREDICTED: fructose-bisphosphate aldolase 1, chloroplastic	Sesamum indicum	NA	NA	NA	NA	NA
TR34881|c1_g1_i2	2718.84	982.477	-1.4685	0.0577328	0.935333	No	hypothetical protein MIMGU_mgv1a015234mg	Mimulus guttatus	NA	NA	NA	NA	NA
TR43175|c1_g3_i5	1186.03	428.859	-1.46757	0.0355913	0.834691	No	hypothetical protein MIMGU_mgv1a003222mg	Mimulus guttatus	NA	methylation[GO:0032259]	methyltransferase activity[GO:0008168]	integral component of membrane[GO:0016021]	NA
TR30137|c0_g1_i7	2269.46	820.68	-1.46746	0.0509938	0.895086	No	PREDICTED: photosystem I reaction center subunit psaK, chloroplastic	Sesamum indicum	NA	NA	NA	NA	NA
TR36520|c0_g2_i1	86.1822	31.1897	-1.46632	0.0620244	0.943758	No	hypothetical protein MIMGU_mgv1a012488mg	Mimulus guttatus	NA	protein complex assembly[GO:0006461]	NA	mitochondrion[GO:0005739]	NA
TR32634|c0_g1_i4	129.273	46.7846	-1.46632	0.056856	0.926945	No	NA	NA	NA	NA	NA	NA	NA
TR36059|c0_g1_i5	172.364	62.3795	-1.46632	0.0508619	0.893324	No	PREDICTED: uncharacterized protein LOC105173315	Sesamum indicum	NA	NA	NA	NA	NA
TR37920|c0_g4_i5	43.0911	15.5949	-1.46632	0.0436763	0.865919	No	PREDICTED: WAT1-related protein At3g02690, chloroplastic	Sesamum indicum	NA	NA	NA	NA	NA
TR40215|c0_g3_i1	43.0911	15.5949	-1.46632	0.0436763	0.865617	No	PREDICTED: uncharacterized protein LOC105179131	Sesamum indicum	NA	NA	NA	NA	NA
TR9573|c0_g1_i1	43.0911	15.5949	-1.46632	0.0436763	0.866221	No	NA	NA	NA	NA	NA	NA	NA
TR43355|c0_g1_i7	344.729	124.759	-1.46632	0.0373626	0.841155	No	NA	NA	NA	NA	NA	NA	NA
TR31039|c0_g2_i2	285.222	103.316	-1.46502	0.0401984	0.850395	No	PREDICTED: casein kinase II subunit alpha-like	Sesamum indicum	NA	NA	NA	NA	NA
TR32543|c1_g1_i2	285.222	103.316	-1.46502	0.0401984	0.851029	No	PREDICTED: omega-hydroxypalmitate O-feruloyl transferase-like	Erythranthe guttatus	NA	NA	NA	NA	NA
TR43319|c1_g2_i2	285.222	103.316	-1.46502	0.0401984	0.850712	No	NA	NA	NA	NA	NA	NA	NA
TR29140|c0_g2_i1	155.949	56.5314	-1.46395	0.0532518	0.908608	No	NA	NA	NA	NA	NA	NA	NA
TR40889|c0_g4_i2	112.858	40.9365	-1.46304	0.0600521	0.937867	No	PREDICTED: putative dual specificity protein phosphatase DSP8	Sesamum indicum	NA	NA	NA	NA	NA
TR44440|c0_g3_i2	112.858	40.9365	-1.46304	0.0600521	0.937609	No	PREDICTED: probable isoleucine--tRNA ligase, mitochondrial	Sesamum indicum	NA	NA	NA	NA	NA
TR34086|c0_g1_i1	225.715	81.8731	-1.46304	0.0450638	0.876298	No	PREDICTED: putative nuclease HARBI1	Sesamum indicum	NA	NA	NA	NA	NA
TR7940|c2_g1_i9	338.573	122.81	-1.46304	0.0380098	0.842042	No	PREDICTED: uncharacterized protein LOC105170122	Sesamum indicum	NA	NA	NA	NA	NA
TR26645|c0_g3_i1	790.003	286.556	-1.46304	0.032926	0.811027	No	Histone H2B.1	Zostera marina	NA	NA	protein heterodimerization activity[GO:0046982] ; DNA binding[GO:0003677]	nucleosome[GO:0000786] ; nucleus[GO:0005634]	NA
TR43738|c0_g6_i4	1988.35	721.263	-1.46297	0.0473721	0.888048	No	PREDICTED: protein translocase subunit SecA, chloroplastic isoform X1	Sesamum indicum	NA	NA	NA	NA	NA
TR42799|c1_g1_i2	182.624	66.2782	-1.46227	0.0501615	0.894857	No	NA	NA	NA	NA	NA	NA	NA
TR26614|c0_g1_i1	182.624	66.2782	-1.46227	0.0501615	0.895138	No	NA	NA	NA	NA	NA	NA	NA
TR39694|c0_g1_i2	2443.88	886.958	-1.46224	0.0545341	0.922177	No	PREDICTED: uncharacterized protein LOC105177775	Sesamum indicum	NA	NA	NA	NA	NA
TR33592|c0_g6_i3	252.391	91.6199	-1.46193	0.0427956	0.864756	No	PREDICTED: nifU-like protein 2, chloroplastic	Sesamum indicum	NA	NA	NA	NA	NA
TR32247|c0_g2_i3	1959.62	711.516	-1.4616	0.0471368	0.885975	No	hypothetical protein MIMGU_mgv1a015025mg	Mimulus guttatus	NA	photosynthesis[GO:0015979] ; lipoate biosynthetic process[GO:0009107]	lipoate synthase activity[GO:0016992] ; 4 iron, 4 sulfur cluster binding[GO:0051539]	NA	map00785:Lipoic acid metabolism(synthase[ec:2.8.1.8])
TR42166|c1_g1_i4	69.7665	25.3417	-1.46102	0.0626059	0.948288	No	hypothetical protein MIMGU_mgv1a0259882mg, partial	Mimulus guttatus	NA	NA	NA	NA	NA
TR43986|c2_g5_i1	69.7665	25.3417	-1.46102	0.0626059	0.947782	No	AF110228_1nuclear RNA binding protein A	Spinacia oleracea	NA	NA	NA	NA	NA
TR7787|c0_g1_i1	69.7665	25.3417	-1.46102	0.0626059	0.948035	No	PREDICTED: vacuolar protein sorting-associated protein 32 homolog 2-like	Sesamum indicum	NA	NA	NA	NA	NA
TR31913|c2_g2_i3	139.533	50.6833	-1.46102	0.0560509	0.924165	No	PREDICTED: 6,7-dimethyl-8-ribityllumazine synthase, chloroplastic	Sesamum indicum	NA	NA	NA	NA	NA
TR33776|c2_g3_i5	279.066	101.367	-1.46102	0.0410617	0.858743	No	PREDICTED: histone H1-like	Sesamum indicum	NA	NA	NA	NA	NA
TR42748|c1_g1_i5	348.833	126.708	-1.46102	0.0378529	0.845823	No	NA	NA	NA	NA	NA	NA	NA
TR34853|c0_g1_i3	235.975	85.7718	-1.46006	0.0444704	0.870121	No	PREDICTED: protein GPR107-like	Sesamum indicum	NA	NA	NA	NA	NA
TR40680|c2_g1_i2	1040.34	378.176	-1.45993	0.0350363	0.836175	No	PREDICTED: bifunctional riboflavin biosynthesis protein RIBA 1, chloroplastic	Sesamum indicum	NA	NA	NA	NA	NA
TR42136|c0_g1_i2	332.417	120.86	-1.45965	0.0386857	0.84743	No	PREDICTED: protein SUPPRESSOR OF GENE SILENCING 3	Sesamum indicum	NA	NA	NA	NA	NA
TR40234|c2_g2_i3	332.417	120.86	-1.45965	0.0386857	0.847757	No	PREDICTED: uncharacterized protein LOC105175605 isoform X1	Sesamum indicum	NA	NA	NA	NA	NA
TR28223|c0_g1_i2	262.65	95.5186	-1.45929	0.0423644	0.864037	No	hypothetical protein MIMGU_mgv1a012197mg	Mimulus guttatus	NA	metabolic process[GO:0008152] ; carbon utilization[GO:0015976]	zinc ion binding[GO:0008270] ; carbonate dehydratase activity[GO:0004089]	NA	map00910:Nitrogen metabolism(dehydratase[ec:4.2.1.1])
TR34356|c0_g1_i1	96.442	35.0885	-1.45866	0.0628998	0.950457	No	NA	NA	NA	NA	NA	NA	NA
TR34532|c0_g3_i1	96.442	35.0885	-1.45866	0.0628998	0.950205	No	PREDICTED: polyadenylate-binding protein RBP45-like	Sesamum indicum	NA	NA	NA	NA	NA
TR32980|c0_g2_i3	1789.31	651.086	-1.45848	0.0449792	0.874954	No	NA	NA	NA	NA	NA	NA	NA
TR34401|c0_g5_i2	562.236	204.683	-1.45779	0.0337192	0.820602	No	PREDICTED: uncharacterized protein LOC105165595	Sesamum indicum	NA	NA	NA	NA	NA
TR26919|c0_g1_i1	342.677	124.759	-1.4577	0.0385085	0.846814	No	PREDICTED: uncharacterized protein LOC105170805	Sesamum indicum	NA	NA	NA	NA	NA
TR29536|c1_g1_i1	465.794	169.594	-1.45761	0.0349508	0.834836	No	PREDICTED: uncharacterized protein LOC105165646	Sesamum indicum	NA	NA	NA	NA	NA
TR34950|c0_g1_i1	123.117	44.8353	-1.45733	0.0593198	0.942233	No	hypothetical protein MIMGU_mgv1a008657mg	Mimulus guttatus	NA	NA	NA	NA	NA
TR30804|c2_g4_i1	149.793	54.582	-1.45647	0.0552395	0.924471	No	hypothetical protein MIMGU_mgv1a015522mg	Mimulus guttatus	NA	NA	NA	NA	NA
TR40055|c1_g3_i1	379.612	138.404	-1.45563	0.0374098	0.84155	No	3-hydroxy-3-methylglutaryl-coenzyme A reductase	Salvia miltiorrhiza	NA	coenzyme A metabolic process[GO:0015936] ; oxidation-reduction process[GO:0055114] ; isoprenoid biosynthetic process[GO:0008299]	hydroxymethylglutaryl-CoA reductase (NADPH) activity[GO:0004420] ; NADP binding[GO:0050661]	integral component of membrane[GO:0016021] ; endoplasmic reticulum membrane[GO:0005789]	map01130:Biosynthesis of antibiotics(reductase (NADPH)[ec:1.1.1.34]) ; map00900:Terpenoid backbone biosynthesis(reductase (NADPH)[ec:1.1.1.34])
TR3915|c1_g1_i1	406.287	148.151	-1.45543	0.0366116	0.843299	No	NA	NA	NA	NA	NA	NA	NA
TR34460|c0_g4_i1	283.17	103.316	-1.4546	0.0416638	0.859623	No	PREDICTED: inositol monophosphatase 3	Sesamum indicum	NA	NA	NA	NA	NA
TR43587|c0_g5_i2	336.521	122.81	-1.45427	0.0391931	0.849049	No	ABC Acyl Transporter	Salvia miltiorrhiza	NA	transmembrane transport[GO:0055085] ; metabolic process[GO:0008152]	ATPase activity, coupled to transmembrane movement of substances[GO:0042626] ; ATP binding[GO:0005524]	integral component of membrane[GO:0016021]	NA
TR38392|c0_g6_i6	913.121	333.34	-1.45381	0.0347157	0.831669	No	PREDICTED: uncharacterized protein LOC105156865 isoform X1	Sesamum indicum	NA	NA	NA	NA	NA
TR39198|c0_g1_i4	523.249	191.037	-1.45364	0.0345624	0.829395	No	PREDICTED: uncharacterized protein LOC105172267 isoform X1	Sesamum indicum	NA	NA	NA	NA	NA
TR42743|c2_g1_i1	816.679	298.252	-1.45324	0.0341949	0.823708	No	PREDICTED: vacuolar protein 8	Sesamum indicum	NA	NA	NA	NA	NA
TR34514|c0_g1_i2	80.0263	29.2404	-1.45251	0.0644838	0.957079	No	hypothetical protein CISIN_1g018472mg	Citrus sinensis	NA	nucleotide biosynthetic process[GO:0009165] ; phosphorylation[GO:0016310] ; ribonucleoside monophosphate biosynthetic process[GO:0009156] ; nucleoside metabolic process[GO:0009116]	kinase activity[GO:0016301] ; ribose phosphate diphosphokinase activity[GO:0004749] ; magnesium ion binding[GO:0000287]	NA	map00030:Pentose phosphate pathway(diphosphokinase[ec:2.7.6.1]) ; map01130:Biosynthesis of antibiotics(diphosphokinase[ec:2.7.6.1]) ; map00230:Purine metabolism(diphosphokinase[ec:2.7.6.1])
TR36680|c0_g4_i8	80.0263	29.2404	-1.45251	0.0644838	0.956579	No	NA	NA	NA	NA	NA	NA	NA
TR39075|c1_g1_i1	80.0263	29.2404	-1.45251	0.0644838	0.956829	No	PREDICTED: delta(24)-sterol reductase	Sesamum indicum	NA	NA	NA	NA	NA
TR40411|c0_g2_i10	106.702	38.9872	-1.45251	0.0627409	0.948815	No	PREDICTED: uncharacterized protein LOC105162629	Sesamum indicum	NA	NA	NA	NA	NA
TR29413|c0_g1_i1	133.377	48.734	-1.45251	0.0583958	0.936724	No	PREDICTED: protein ASPARTIC PROTEASE IN GUARD CELL 2-like	Sesamum indicum	NA	NA	NA	NA	NA
TR2655|c0_g5_i7	133.377	48.734	-1.45251	0.0583958	0.936459	No	hypothetical protein M569_03155, partial	Genlisea aurea	NA	protein targeting[GO:0006605] ; protein transmembrane transport[GO:0071806]	P-P-bond-hydrolysis-driven protein transmembrane transporter activity[GO:0015450]	intracellular[GO:0005622] ; integral component of membrane[GO:0016021]	NA
TR34143|c0_g1_i2	133.377	48.734	-1.45251	0.0583958	0.936195	No	NA	NA	NA	NA	NA	NA	NA
TR29469|c2_g1_i2	53.3509	19.4936	-1.45251	0.0579463	0.934793	No	PREDICTED: expansin-A6-like	Sesamum indicum	NA	NA	NA	NA	NA
TR33229|c0_g5_i4	53.3509	19.4936	-1.45251	0.0579463	0.935058	No	PREDICTED: probable strigolactone esterase D14 homolog	Sesamum indicum	NA	NA	NA	NA	NA
TR33644|c0_g2_i1	53.3509	19.4936	-1.45251	0.0579463	0.933732	No	PREDICTED: 2-aminoethanethiol dioxygenase-like	Sesamum indicum	NA	NA	NA	NA	NA
TR38495|c0_g5_i1	53.3509	19.4936	-1.45251	0.0579463	0.933467	No	PREDICTED: protein TIC 21, chloroplastic	Sesamum indicum	NA	NA	NA	NA	NA
TR38972|c1_g5_i1	53.3509	19.4936	-1.45251	0.0579463	0.934262	No	PREDICTED: uncharacterized protein LOC105172351	Sesamum indicum	NA	NA	NA	NA	NA
TR42190|c1_g2_i1	53.3509	19.4936	-1.45251	0.0579463	0.933997	No	PREDICTED: galacturonosyltransferase 8-like	Sesamum indicum	NA	NA	NA	NA	NA
TR43145|c1_g8_i1	53.3509	19.4936	-1.45251	0.0579463	0.933203	No	nitrite reductase	Fragaria x ananassa	NA	oxidation-reduction process[GO:0055114]	heme binding[GO:0020037] ; oxidoreductase activity[GO:0016491] ; iron-sulfur cluster binding[GO:0051536]	NA	NA
TR7852|c2_g2_i1	53.3509	19.4936	-1.45251	0.0579463	0.934527	No	NA	NA	NA	NA	NA	NA	NA
TR40235|c0_g4_i1	186.728	68.2276	-1.45251	0.051081	0.894957	No	PREDICTED: uncharacterized protein LOC105159766	Sesamum indicum	NA	NA	NA	NA	NA
TR39594|c0_g1_i2	266.754	97.4679	-1.45251	0.0429765	0.865642	No	NA	NA	NA	NA	NA	NA	NA
TR40781|c0_g1_i3	266.754	97.4679	-1.45251	0.0429765	0.865335	No	NA	NA	NA	NA	NA	NA	NA
TR26645|c0_g1_i2	320.105	116.962	-1.45251	0.0401296	0.851159	No	NA	NA	NA	NA	NA	NA	NA
TR43208|c4_g2_i1	26.6754	9.74679	-1.45251	0.01472	0.650163	No	NA	NA	NA	NA	NA	NA	NA
TR33243|c0_g1_i2	2105.31	769.997	-1.45111	0.0510408	0.895081	No	PREDICTED: psbP-like protein 2, chloroplastic	Sesamum indicum	NA	NA	NA	NA	NA
TR8037|c0_g1_i1	223.663	81.8731	-1.44987	0.0471089	0.886037	No	PREDICTED: protein ASPARTIC PROTEASE IN GUARD CELL 2-like	Sesamum indicum	NA	NA	NA	NA	NA
TR42671|c0_g8_i2	196.988	72.1263	-1.44951	0.0502334	0.890823	No	NA	NA	NA	NA	NA	NA	NA
TR8216|c1_g5_i2	170.312	62.3795	-1.44904	0.053732	0.913782	No	PREDICTED: EH domain-containing protein 1-like	Sesamum indicum	NA	NA	NA	NA	NA
TR42311|c0_g4_i5	601.223	220.278	-1.44858	0.0345713	0.82926	No	hypothetical protein MIMGU_mgv1a001106mg	Mimulus guttatus	NA	NA	NA	NA	NA
TR37157|c0_g1_i1	143.637	52.6327	-1.4484	0.0574285	0.933599	No	NA	NA	NA	NA	NA	NA	NA
TR44572|c1_g1_i10	287.274	105.265	-1.4484	0.042261	0.862237	No	NA	NA	NA	NA	NA	NA	NA
TR40263|c0_g1_i5	260.599	95.5186	-1.44798	0.0440363	0.87002	No	PREDICTED: phosphoribosylamine--glycine ligase isoform X1	Sesamum indicum	NA	NA	NA	NA	NA
TR3355|c0_g1_i2	1286.58	471.745	-1.44746	0.0393592	0.8507	No	PREDICTED: protein TIC 62, chloroplastic	Sesamum indicum	NA	NA	NA	NA	NA
TR2254|c0_g1_i1	999.303	366.479	-1.44719	0.0362346	0.839723	No	geraniol dehydrogenase	Perilla setoyensis	NA	oxidation-reduction process[GO:0055114]	zinc ion binding[GO:0008270] ; geraniol dehydrogenase activity[GO:0047924]	NA	map01130:Biosynthesis of antibiotics(dehydrogenase (NADP+)[ec:1.1.1.183]) ; map00281:Geraniol degradation(dehydrogenase (NADP+)[ec:1.1.1.183])
TR3700|c0_g2_i4	207.248	76.025	-1.44681	0.0493865	0.902866	No	hypothetical protein MIMGU_mgv11b012208mg	Mimulus guttatus	NA	electron transport chain[GO:0022900]	metal ion binding[GO:0046872] ; electron carrier activity[GO:0009055] ; 2 iron, 2 sulfur cluster binding[GO:0051537]	NA	NA
TR37092|c5_g1_i2	3601.18	1321.67	-1.44611	0.0758179	0.986605	No	PREDICTED: tubulin beta-3 chain-like	Sesamum indicum	NA	NA	NA	NA	NA
TR33744|c0_g3_i1	90.2861	33.1391	-1.44597	0.0655074	0.958251	No	PREDICTED: uncharacterized protein LOC105169799 isoform X2	Sesamum indicum	NA	NA	NA	NA	NA
TR39063|c0_g1_i4	153.897	56.5314	-1.44484	0.0565099	0.927694	No	PREDICTED: uncharacterized protein LOC105177301	Sesamum indicum	NA	NA	NA	NA	NA
TR36647|c1_g5_i6	217.507	79.9237	-1.44437	0.0485641	0.898531	No	PREDICTED: protein LOW PSII ACCUMULATION 3, chloroplastic	Sesamum indicum	NA	NA	NA	NA	NA
TR35318|c1_g1_i5	1251.69	460.049	-1.44402	0.0393832	0.850896	No	PREDICTED: ribose-phosphate pyrophosphokinase 5, chloroplastic isoform X2	Solanum lycopersicum	NA	NA	NA	NA	NA
TR24966|c0_g1_i1	63.6107	23.3923	-1.44323	0.0646752	0.957669	No	PREDICTED: clustered mitochondria protein-like isoform X1	Sesamum indicum	NA	NA	NA	NA	NA
TR26278|c0_g2_i1	63.6107	23.3923	-1.44323	0.0646752	0.957918	No	PREDICTED: calcium-transporting ATPase 4, plasma membrane-type-like	Sesamum indicum	NA	NA	NA	NA	NA
TR28539|c0_g1_i1	63.6107	23.3923	-1.44323	0.0646752	0.957419	No	hypothetical protein MIMGU_mgv1a017305mg	Mimulus guttatus	NA	NA	NA	NA	NA
TR36142|c1_g1_i6	63.6107	23.3923	-1.44323	0.0646752	0.958168	No	Os02g0220600, partial	Oryza sativa Japonica Group	NA	NA	NA	NA	NA
TR39766|c1_g2_i2	63.6107	23.3923	-1.44323	0.0646752	0.95717	No	NA	NA	NA	NA	NA	NA	NA
TR2416|c0_g2_i1	190.832	70.1769	-1.44323	0.0519492	0.89689	No	NA	NA	NA	NA	NA	NA	NA
TR3634|c2_g4_i1	5417.17	1992.24	-1.44314	0.105125	1.05498	No	vanillin synthase	Glechoma hederacea	Lamiaceae	proteolysis[GO:0006508]	cysteine-type peptidase activity[GO:0008234]	NA	NA
TR37181|c0_g1_i2	227.767	83.8224	-1.44215	0.0477827	0.893385	No	PREDICTED: lycopene epsilon cyclase, chloroplastic	Sesamum indicum	NA	NA	NA	NA	NA
TR42428|c0_g4_i4	1530.76	563.365	-1.44211	0.0434474	0.863793	No	NA	NA	NA	NA	NA	NA	NA
TR8888|c0_g1_i1	164.157	60.4301	-1.44173	0.0556743	0.926834	No	NA	NA	NA	NA	NA	NA	NA
TR30641|c0_g4_i6	100.546	37.0378	-1.44078	0.0655965	0.95832	No	PREDICTED: zinc finger CCCH domain-containing protein 53	Sesamum indicum	NA	NA	NA	NA	NA
TR32859|c0_g4_i2	100.546	37.0378	-1.44078	0.0655965	0.958074	No	PREDICTED: uncharacterized protein LOC105177930	Sesamum indicum	NA	NA	NA	NA	NA
TR36462|c0_g4_i1	201.092	74.0756	-1.44078	0.0510241	0.895065	No	PREDICTED: altered inheritance of mitochondria protein 32	Sesamum indicum	NA	NA	NA	NA	NA
TR37463|c0_g2_i3	137.481	50.6833	-1.43965	0.0598358	0.938359	No	NA	NA	NA	NA	NA	NA	NA
TR36341|c1_g2_i6	274.962	101.367	-1.43965	0.0441777	0.870089	No	PREDICTED: protein NRT1/ PTR FAMILY 3.1 isoform X2	Sesamum indicum	NA	NA	NA	NA	NA
TR40015|c0_g5_i6	311.897	115.012	-1.43929	0.0422552	0.862738	No	PREDICTED: uncharacterized protein LOC105167168	Sesamum indicum	NA	NA	NA	NA	NA
TR30192|c0_g1_i1	311.897	115.012	-1.43929	0.0422552	0.862428	No	PREDICTED: uncharacterized oxidoreductase At4g09670-like	Sesamum indicum	NA	NA	NA	NA	NA
TR35670|c0_g10_i4	174.416	64.3288	-1.439	0.0547598	0.922696	No	PREDICTED: uncharacterized protein LOC105157246 isoform X3	Sesamum indicum	NA	NA	NA	NA	NA
TR36106|c1_g1_i2	174.416	64.3288	-1.439	0.0547598	0.922423	No	NA	NA	NA	NA	NA	NA	NA
TR36101|c0_g1_i1	3828.95	1413.29	-1.4379	0.0812013	1.0029	No	PREDICTED: uncharacterized protein LOC105158378	Sesamum indicum	NA	NA	NA	NA	NA
TR40674|c0_g3_i3	681.25	251.467	-1.43781	0.0357034	0.835252	No	PREDICTED: pentatricopeptide repeat-containing protein At2g42920, chloroplastic	Sesamum indicum	NA	NA	NA	NA	NA
TR41674|c0_g3_i3	543.769	200.784	-1.43735	0.0363282	0.839494	No	PREDICTED: plastidic ATP/ADP-transporter-like	Sesamum indicum	NA	NA	NA	NA	NA
TR29650|c0_g2_i1	1383.02	510.732	-1.43718	0.0420446	0.860294	No	PREDICTED: 50S ribosomal protein L28, chloroplastic	Sesamum indicum	NA	NA	NA	NA	NA
TR41171|c0_g2_i1	73.8704	27.291	-1.43657	0.0672629	0.965529	No	PREDICTED: UDP-sulfoquinovose synthase, chloroplastic isoform X1	Sesamum indicum	NA	NA	NA	NA	NA
TR28780|c0_g1_i3	110.806	40.9365	-1.43657	0.0648826	0.957992	No	hypothetical protein MIMGU_mgv1a016902mg	Mimulus guttatus	NA	NA	2 iron, 2 sulfur cluster binding[GO:0051537]	intracellular membrane-bounded organelle[GO:0043231]	NA
TR32306|c0_g4_i6	110.806	40.9365	-1.43657	0.0648826	0.958242	No	PREDICTED: ferredoxin, root R-B1-like	Sesamum indicum	NA	NA	NA	NA	NA
TR40781|c0_g3_i1	110.806	40.9365	-1.43657	0.0648826	0.958491	No	GTP-binding protein Era isoform 2	Theobroma cacao	NA	positive regulation of transcription, DNA-templated[GO:0045893] ; protein targeting to chloroplast[GO:0045036] ; embryo development ending in seed dormancy[GO:0009793] ; iron-sulfur cluster assembly[GO:0016226] ; isopentenyl diphosphate biosynthetic process, methylerythritol 4-phosphate pathway[GO:0019288] ; transcription from plastid promoter[GO:0042793]	GTP binding[GO:0005525] ; RNA binding[GO:0003723]	chloroplast[GO:0009507]	NA
TR43435|c1_g5_i7	110.806	40.9365	-1.43657	0.0648826	0.95874	No	PREDICTED: subtilisin-like protease SBT5.3	Nicotiana tomentosiformis	NA	NA	NA	NA	NA
TR35174|c0_g1_i7	147.741	54.582	-1.43657	0.0587354	0.938461	No	PREDICTED: glucan endo-1,3-beta-glucosidase-like	Sesamum indicum	NA	NA	NA	NA	NA
TR42789|c0_g2_i3	221.611	81.8731	-1.43657	0.0492509	0.901547	No	PREDICTED: tubulin--tyrosine ligase-like protein 12 isoform X2	Sesamum indicum	NA	NA	NA	NA	NA
TR32235|c2_g1_i7	36.9352	13.6455	-1.43657	0.0373266	0.846045	No	putative ethylene responsive element-DREB	Capsicum annuum	NA	regulation of transcription, DNA-templated[GO:0006355] ; transcription, DNA-templated[GO:0006351]	transcription factor activity, sequence-specific DNA binding[GO:0003700] ; DNA binding[GO:0003677]	nucleus[GO:0005634]	NA
TR33250|c0_g1_i1	36.9352	13.6455	-1.43657	0.0373266	0.84436	No	PREDICTED: NADPH-dependent 1-acyldihydroxyacetone phosphate reductase-like	Sesamum indicum	NA	NA	NA	NA	NA
TR37327|c0_g3_i1	36.9352	13.6455	-1.43657	0.0373266	0.845707	No	PREDICTED: rac-like GTP-binding protein RHO1 isoform 1	Vitis vinifera	NA	small GTPase mediated signal transduction[GO:0007264]	GTP binding[GO:0005525]	intracellular[GO:0005622] ; membrane[GO:0016020]	NA
TR38768|c0_g6_i1	36.9352	13.6455	-1.43657	0.0373266	0.846382	No	hypothetical protein JCGZ_16178	Jatropha curcas	NA	regulation of signal transduction[GO:0009966]	NA	NA	NA
TR41611|c0_g6_i1	36.9352	13.6455	-1.43657	0.0373266	0.844696	No	PREDICTED: uncharacterized protein LOC105167842	Sesamum indicum	NA	NA	NA	NA	NA
TR44712|c5_g4_i1	36.9352	13.6455	-1.43657	0.0373266	0.845033	No	PREDICTED: LRR receptor-like serine/threonine-protein kinase ERL2 isoform X2	Sesamum indicum	NA	NA	NA	NA	NA
TR2534|c0_g2_i1	36.9352	13.6455	-1.43657	0.0373266	0.844024	No	NA	NA	NA	NA	NA	NA	NA
TR34287|c2_g6_i1	36.9352	13.6455	-1.43657	0.0373266	0.84537	No	hypothetical protein SOVF_136810	Spinacia oleracea	NA	pectin catabolic process[GO:0045490]	metal ion binding[GO:0046872] ; pectate lyase activity[GO:0030570]	NA	map00040:Pentose and glucuronate interconversions(lyase[ec:4.2.2.2])
TR42400|c0_g5_i1	500.677	185.189	-1.43488	0.0371391	0.844829	No	PREDICTED: ATP-dependent zinc metalloprotease FTSH 11, chloroplastic/mitochondrial isoform X2	Sesamum indicum	NA	NA	NA	NA	NA
TR38252|c0_g1_i1	1875.49	693.972	-1.43432	0.0500387	0.89576	No	PREDICTED: probable zinc metalloprotease EGY2, chloroplastic isoform X1	Erythranthe guttatus	NA	NA	NA	NA	NA
TR41177|c0_g8_i2	158.001	58.4808	-1.4339	0.0577309	0.935571	No	nectar protein 1	Jacaranda mimosifolia	NA	metabolic process[GO:0008152]	hydrolase activity, acting on ester bonds[GO:0016788]	NA	NA
TR44200|c0_g1_i4	642.262	237.822	-1.43328	0.0363048	0.83998	No	argonaute 2	Salvia miltiorrhiza	NA	NA	nucleic acid binding[GO:0003676]	NA	NA
TR36633|c0_g5_i5	121.065	44.8353	-1.43308	0.0637614	0.957871	No	NA	NA	NA	NA	NA	NA	NA
TR2471|c0_g1_i2	2421.31	896.705	-1.43308	0.0591848	0.942725	No	PREDICTED: psbP-like protein 1, chloroplastic	Sesamum indicum	NA	NA	NA	NA	NA
TR28199|c0_g1_i1	326.261	120.86	-1.43269	0.0424769	0.863848	No	hypothetical protein MIMGU_mgv11b021692mg	Mimulus guttatus	NA	NA	NA	membrane[GO:0016020]	NA
TR34249|c0_g5_i2	84.1302	31.1897	-1.43155	0.0682287	0.967171	No	PREDICTED: peptidyl-prolyl cis-trans isomerase CYP18-2	Sesamum indicum	NA	NA	NA	NA	NA
TR38710|c0_g2_i4	84.1302	31.1897	-1.43155	0.0682287	0.96693	No	hypothetical protein MIMGU_mgv1a0078931mg, partial	Mimulus guttatus	NA	proteolysis[GO:0006508]	serine-type carboxypeptidase activity[GO:0004185]	integral component of membrane[GO:0016021]	NA
TR41307|c0_g4_i1	84.1302	31.1897	-1.43155	0.0682287	0.966689	No	PREDICTED: glutamyl-tRNA(Gln) amidotransferase subunit B, chloroplastic/mitochondrial	Sesamum indicum	NA	NA	NA	NA	NA
TR3643|c0_g2_i4	168.26	62.3795	-1.43155	0.0567699	0.926339	No	PREDICTED: uncharacterized protein LOC105977107	Erythranthe guttatus	NA	NA	NA	NA	NA
TR2768|c1_g3_i3	3190.79	1183.26	-1.43115	0.0722187	0.979956	No	PREDICTED: heat shock cognate 70 kDa protein 2-like	Sesamum indicum	NA	NA	NA	NA	NA
TR22308|c0_g1_i1	730.497	270.961	-1.43079	0.0366383	0.843572	No	NA	NA	NA	NA	NA	NA	NA
TR34732|c1_g1_i6	131.325	48.734	-1.43014	0.0624796	0.947637	No	PREDICTED: RNA polymerase II C-terminal domain phosphatase-like 4	Sesamum indicum	NA	NA	NA	NA	NA
TR32428|c1_g2_i3	309.845	115.012	-1.42976	0.0436563	0.866126	No	PREDICTED: high mobility group B protein 7-like	Sesamum indicum	NA	NA	NA	NA	NA
TR32518|c0_g1_i1	178.52	66.2782	-1.42948	0.0557198	0.922724	No	NA	NA	NA	NA	NA	NA	NA
TR42436|c0_g2_i2	357.04	132.556	-1.42948	0.0415998	0.858928	No	NA	NA	NA	NA	NA	NA	NA
TR39520|c1_g5_i2	508.885	189.088	-1.42828	0.0378608	0.845666	No	hypothetical protein, partial	Zea mays	NA	proteolysis[GO:0006508]	aspartic-type endopeptidase activity[GO:0004190]	NA	NA
TR28107|c0_g1_i3	556.08	206.632	-1.42823	0.0373661	0.840901	No	PREDICTED: uncharacterized protein LOC105156396	Sesamum indicum	NA	NA	NA	NA	NA
TR34503|c1_g5_i2	2207.91	820.68	-1.42779	0.0565907	0.925276	No	PREDICTED: fructose-bisphosphate aldolase 1, chloroplastic	Sesamum indicum	NA	NA	NA	NA	NA
TR44432|c1_g1_i1	94.39	35.0885	-1.42764	0.068601	0.965463	No	PREDICTED: chaperone protein ClpD, chloroplastic	Sesamum indicum	NA	NA	NA	NA	NA
TR39155|c0_g3_i1	94.39	35.0885	-1.42764	0.068601	0.965942	No	PREDICTED: molybdopterin biosynthesis protein CNX1	Sesamum indicum	NA	NA	NA	NA	NA
TR41055|c0_g1_i5	94.39	35.0885	-1.42764	0.068601	0.965702	No	rnase l inhibitor, putative	Ricinus communis	NA	NA	NA	NA	NA
TR31805|c0_g2_i5	47.195	17.5442	-1.42764	0.0558141	0.923476	No	hypothetical protein MIMGU_mgv1a012980mg	Mimulus guttatus	NA	NA	NA	integral component of membrane[GO:0016021]	NA
TR33471|c0_g2_i1	47.195	17.5442	-1.42764	0.0558141	0.924015	No	PREDICTED: auxin-induced protein X15-like	Sesamum indicum	NA	NA	NA	NA	NA
TR37760|c0_g3_i1	47.195	17.5442	-1.42764	0.0558141	0.923745	No	PREDICTED: eukaryotic translation initiation factor 4B	Sesamum indicum	NA	NA	NA	NA	NA
TR41983|c0_g5_i1	47.195	17.5442	-1.42764	0.0558141	0.922939	No	NA	NA	NA	NA	NA	NA	NA
TR43346|c0_g3_i1	47.195	17.5442	-1.42764	0.0558141	0.92267	No	PREDICTED: ubiquitin carboxyl-terminal hydrolase 23	Sesamum indicum	NA	NA	NA	NA	NA
TR44570|c1_g2_i4	47.195	17.5442	-1.42764	0.0558141	0.923207	No	PREDICTED: probable splicing factor 3A subunit 1	Sesamum indicum	NA	NA	NA	NA	NA
TR37888|c0_g3_i10	235.975	87.7211	-1.42764	0.0490702	0.899979	No	hypothetical protein MIMGU_mgv1a003477mg	Mimulus guttatus	NA	microtubule cytoskeleton organization[GO:0000226] ; cytokinesis[GO:0000910]	microtubule binding[GO:0008017]	NA	NA
TR29776|c1_g3_i1	718.185	267.062	-1.42718	0.0370731	0.848083	No	NA	NA	NA	NA	NA	NA	NA
TR39963|c2_g7_i1	1707.23	635.491	-1.42571	0.048652	0.898986	No	PREDICTED: phosphoribulokinase, chloroplastic-like	Solanum tuberosum	NA	salicylic acid biosynthetic process[GO:0009697] ; response to red light[GO:0010114] ; regulation of plant-type hypersensitive response[GO:0010363] ; response to chitin[GO:0010200] ; cysteine biosynthetic process[GO:0019344] ; negative regulation of defense response[GO:0031348] ; defense response to fungus[GO:0050832] ; pentose-phosphate shunt[GO:0006098] ; jasmonic acid mediated signaling pathway…	phosphoribulokinase activity[GO:0008974] ; ATP binding[GO:0005524]	stromule[GO:0010319] ; chloroplast stroma[GO:0009570] ; chloroplast envelope[GO:0009941] ; apoplast[GO:0048046] ; chloroplast thylakoid membrane[GO:0009535]	map00710:Carbon fixation in photosynthetic organisms(phosphopentokinase[ec:2.7.1.19])
TR28927|c0_g2_i3	303.69	113.063	-1.42547	0.0445635	0.871043	No	NA	NA	NA	NA	NA	NA	NA
TR41216|c1_g1_i3	104.65	38.9872	-1.4245	0.0679919	0.966227	No	hypothetical protein JCGZ_23182	Jatropha curcas	NA	protein phosphorylation[GO:0006468]	protein kinase activity[GO:0004672] ; ATP binding[GO:0005524]	NA	NA
TR37836|c2_g2_i1	313.949	116.962	-1.4245	0.0441891	0.868506	No	TPA: hypothetical protein ZEAMMB73_603083	Zea mays	NA	NA	NA	NA	NA
TR30039|c0_g2_i1	3845.37	1432.78	-1.42431	0.0844403	1.01573	No	PREDICTED: photosystem I reaction center subunit II, chloroplastic-like	Sesamum indicum	NA	NA	NA	NA	NA
TR2544|c0_g1_i1	266.754	99.4173	-1.42394	0.0469652	0.8848	No	hypothetical protein MIMGU_mgv1a013671mg	Mimulus guttatus	NA	nucleotide phosphorylation[GO:0046939] ; pyrimidine nucleotide biosynthetic process[GO:0006221] ; 'de novo' pyrimidine nucleobase biosynthetic process[GO:0006207]	cytidylate kinase activity[GO:0004127] ; ATP binding[GO:0005524] ; uridylate kinase activity[GO:0009041]	cytoplasm[GO:0005737] ; nucleus[GO:0005634]	map00240:Pyrimidine metabolism(kinase[ec:2.7.4.14])
TR2977|c0_g2_i5	1229.12	458.099	-1.4239	0.041871	0.859529	No	hypothetical protein MIMGU_mgv1a014729mg	Mimulus guttatus	NA	NA	NA	NA	NA
TR2545|c0_g2_i1	219.559	81.8731	-1.42315	0.0514946	0.8953	No	NA	NA	NA	NA	NA	NA	NA
TR31994|c0_g5_i1	114.91	42.8859	-1.42192	0.0668111	0.965879	No	PREDICTED: protein THYLAKOID FORMATION1, chloroplastic-like	Musa acuminata subsp. malaccensis	NA	photosystem II assembly[GO:0010207]	NA	NA	NA
TR33089|c0_g1_i1	57.4548	21.4429	-1.42192	0.0662151	0.962407	No	PREDICTED: filament-like plant protein 3	Sesamum indicum	NA	NA	NA	NA	NA
TR34097|c0_g1_i4	57.4548	21.4429	-1.42192	0.0662151	0.963146	No	NA	NA	NA	NA	NA	NA	NA
TR36322|c1_g4_i5	57.4548	21.4429	-1.42192	0.0662151	0.962653	No	PREDICTED: protein DEHYDRATION-INDUCED 19 homolog 7-like	Sesamum indicum	NA	NA	NA	NA	NA
TR37850|c0_g1_i2	57.4548	21.4429	-1.42192	0.0662151	0.962161	No	PREDICTED: uncharacterized protein LOC105169576	Sesamum indicum	NA	NA	NA	NA	NA
TR27927|c0_g1_i5	57.4548	21.4429	-1.42192	0.0662151	0.9629	No	PREDICTED: myb-related protein 3R-1-like	Erythranthe guttatus	NA	NA	NA	NA	NA
TR42231|c0_g6_i3	229.819	85.7718	-1.42192	0.0505555	0.890696	No	NA	NA	NA	NA	NA	NA	NA
TR40640|c1_g1_i3	804.367	300.201	-1.42192	0.0380537	0.842358	No	PREDICTED: DEAD-box ATP-dependent RNA helicase 47A	Sesamum indicum	NA	NA	NA	NA	NA
TR8217|c1_g1_i2	595.067	222.227	-1.42102	0.0380332	0.842231	No	PREDICTED: NO-associated protein 1, chloroplastic/mitochondrial	Sesamum indicum	NA	NA	NA	NA	NA
TR42748|c1_g1_i1	480.158	179.341	-1.4208	0.0392799	0.850606	No	hypothetical protein MIMGU_mgv1a002988mg	Mimulus guttatus	NA	NA	ATP binding[GO:0005524]	integral component of membrane[GO:0016021]	NA
TR42186|c0_g1_i7	182.624	68.2276	-1.42045	0.0566181	0.925458	No	NA	NA	NA	NA	NA	NA	NA
TR33321|c4_g1_i5	558.132	208.581	-1.42	0.0384101	0.847275	No	PREDICTED: flavanone 3-dioxygenase-like	Sesamum indicum	NA	NA	NA	NA	NA
TR36005|c0_g10_i6	125.169	46.7846	-1.41978	0.0653788	0.959086	No	PREDICTED: glutathione S-transferase 2-like	Sesamum indicum	NA	NA	NA	NA	NA
TR40993|c0_g3_i1	125.169	46.7846	-1.41978	0.0653788	0.958591	No	PREDICTED: uncharacterized protein LOC105168193	Sesamum indicum	NA	NA	NA	NA	NA
TR39055|c0_g3_i4	125.169	46.7846	-1.41978	0.0653788	0.958839	No	PREDICTED: neural Wiskott-Aldrich syndrome protein	Sesamum indicum	NA	NA	NA	NA	NA
TR32898|c1_g1_i1	250.339	93.5692	-1.41978	0.0488954	0.897643	No	hypothetical protein EUGRSUZ_B040322, partial	Eucalyptus grandis	NA	protein catabolic process[GO:0030163]	hydrolase activity[GO:0016787] ; ATP binding[GO:0005524]	cytoplasm[GO:0005737]	NA
TR24662|c0_g1_i1	67.7146	25.3417	-1.41795	0.0702235	0.969088	No	PREDICTED: protein STRUBBELIG-RECEPTOR FAMILY 3 isoform X2	Erythranthe guttatus	NA	NA	NA	NA	NA
TR32171|c0_g4_i1	67.7146	25.3417	-1.41795	0.0702235	0.968618	No	PREDICTED: uncharacterized protein LOC105167918	Sesamum indicum	NA	NA	NA	NA	NA
TR36676|c0_g1_i6	67.7146	25.3417	-1.41795	0.0702235	0.968853	No	hypothetical protein JCGZ_17756	Jatropha curcas	NA	coenzyme A biosynthetic process[GO:0015937] ; phosphorylation[GO:0016310]	ATP binding[GO:0005524] ; pantothenate kinase activity[GO:0004594]	NA	map00770:Pantothenate and CoA biosynthesis(kinase[ec:2.7.1.33])
TR43807|c0_g4_i3	67.7146	25.3417	-1.41795	0.0702235	0.968382	No	NA	NA	NA	NA	NA	NA	NA
TR42019|c0_g5_i1	338.573	126.708	-1.41795	0.0439593	0.869103	No	hypothetical protein MIMGU_mgv1a003035mg	Mimulus guttatus	NA	leukotriene biosynthetic process[GO:0019370] ; proteolysis[GO:0006508]	zinc ion binding[GO:0008270] ; metallopeptidase activity[GO:0008237]	NA	NA
TR31223|c0_g1_i1	145.689	54.582	-1.41639	0.0624667	0.947695	No	PREDICTED: uncharacterized protein LOC105172147	Sesamum indicum	NA	NA	NA	NA	NA
TR33797|c0_g1_i9	223.663	83.8224	-1.41592	0.0521446	0.897807	No	hypothetical protein MIMGU_mgv1a009648mg	Mimulus guttatus	NA	NA	nucleic acid binding[GO:0003676]	NA	NA
TR2383|c0_g5_i1	2454.14	920.097	-1.41536	0.0629699	0.951012	No	photosystem I reaction center subunit XI, partial (chloroplast)	Camellia sinensis	NA	photosynthesis[GO:0015979]	NA	integral component of membrane[GO:0016021] ; photosystem I reaction center[GO:0009538] ; chloroplast[GO:0009507]	NA
TR36918|c0_g1_i5	77.9744	29.2404	-1.41504	0.0713978	0.974638	No	PREDICTED: uncharacterized protein LOC105170638 isoform X2	Sesamum indicum	NA	NA	NA	NA	NA
TR39529|c0_g1_i1	77.9744	29.2404	-1.41504	0.0713978	0.974872	No	NA	NA	NA	NA	NA	NA	NA
TR7858|c0_g1_i1	77.9744	29.2404	-1.41504	0.0713978	0.975107	No	Basic helix-loop-helix DNA-binding superfamily protein isoform 2	Theobroma cacao	NA	regulation of transcription, DNA-templated[GO:0006355] ; double fertilization forming a zygote and endosperm[GO:0009567]	transcription factor activity, sequence-specific DNA binding[GO:0003700] ; DNA binding[GO:0003677] ; protein dimerization activity[GO:0046983]	plasmodesma[GO:0009506] ; integral component of membrane[GO:0016021]	NA
TR42688|c0_g4_i2	77.9744	29.2404	-1.41504	0.0713978	0.974404	No	hypothetical protein MIMGU_mgv1a003163mg	Mimulus guttatus	NA	mRNA splicing, via spliceosome[GO:0000398]	NA	spliceosomal complex[GO:0005681]	NA
TR41735|c1_g3_i1	5411.01	2029.28	-1.41493	0.112204	1.0672	No	methionine synthase	Orobanche ramosa	NA	methionine biosynthetic process[GO:0009086] ; methylation[GO:0032259]	zinc ion binding[GO:0008270] ; 5-methyltetrahydropteroyltriglutamate-homocysteine S-methyltransferase activity[GO:0003871]	NA	map00450:Selenocompound metabolism(S-methyltransferase[ec:2.1.1.14]) ; map00270:Cysteine and methionine metabolism(S-methyltransferase[ec:2.1.1.14])
TR36664|c0_g2_i1	332.417	124.759	-1.41385	0.0448187	0.872728	No	hypothetical protein MIMGU_mgv1a007833mg	Mimulus guttatus	NA	carbohydrate metabolic process[GO:0005975]	catalytic activity[GO:0003824]	NA	NA
TR40068|c3_g1_i1	508.885	191.037	-1.41349	0.0397962	0.852683	No	PREDICTED: LOW QUALITY PROTEIN: benzyl alcohol O-benzoyltransferase-like	Sesamum indicum	NA	NA	NA	NA	NA
TR41881|c0_g2_i3	342.677	128.658	-1.41331	0.0444345	0.869719	No	PREDICTED: glucose-6-phosphate 1-dehydrogenase, chloroplastic	Sesamum indicum	NA	NA	NA	NA	NA
TR27424|c1_g1_i3	519.145	194.936	-1.41314	0.0397088	0.853387	No	PREDICTED: LOW QUALITY PROTEIN: transketolase, chloroplastic	Sesamum indicum	NA	NA	NA	NA	NA
TR36793|c2_g1_i3	88.2341	33.1391	-1.4128	0.0717232	0.976498	No	PREDICTED: tyrosine--tRNA ligase, cytoplasmic-like	Sesamum indicum	NA	NA	NA	NA	NA
TR39085|c0_g3_i1	88.2341	33.1391	-1.4128	0.0717232	0.976732	No	PREDICTED: histone H1-like	Sesamum indicum	NA	NA	NA	NA	NA
TR32703|c1_g1_i12	176.468	66.2782	-1.4128	0.058734	0.938703	No	hypothetical protein MIMGU_mgv1a011677mg	Mimulus guttatus	NA	metabolic process[GO:0008152]	hydrolase activity[GO:0016787]	NA	NA
TR7851|c0_g2_i5	1422.01	534.124	-1.41268	0.0462026	0.878886	No	hypothetical protein M569_14824, partial	Genlisea aurea	NA	NA	nucleic acid binding[GO:0003676] ; nucleotide binding[GO:0000166]	NA	NA
TR38776|c0_g2_i6	461.69	173.493	-1.41205	0.0408073	0.859435	No	cytochrome P450 CYP94C54	Salvia miltiorrhiza	NA	oxidation-reduction process[GO:0055114]	heme binding[GO:0020037] ; oxidoreductase activity, acting on paired donors, with incorporation or reduction of molecular oxygen[GO:0016705] ; monooxygenase activity[GO:0004497] ; iron ion binding[GO:0005506]	NA	NA
TR18839|c0_g2_i1	373.456	140.354	-1.41187	0.0433861	0.864087	No	hypothetical protein AALP_AA6G005800	Arabis alpina	NA	transport[GO:0006810]	transporter activity[GO:0005215]	integral component of membrane[GO:0016021]	NA
TR34235|c0_g3_i4	560.184	210.531	-1.41187	0.0394663	0.851395	No	NA	NA	NA	NA	NA	NA	NA
TR41507|c1_g2_i5	1042.39	391.821	-1.41163	0.0413914	0.862463	No	PREDICTED: 3-ketoacyl-CoA synthase 11	Sesamum indicum	NA	NA	NA	NA	NA
TR38084|c1_g2_i1	98.4939	37.0378	-1.41104	0.0713188	0.976846	No	deficiens H68 homologue	Misopates orontium	NA	regulation of transcription, DNA-templated[GO:0006355] ; transcription, DNA-templated[GO:0006351]	transcription factor activity, sequence-specific DNA binding[GO:0003700] ; DNA binding[GO:0003677] ; protein dimerization activity[GO:0046983]	nucleus[GO:0005634]	NA
TR31330|c3_g4_i1	393.976	148.151	-1.41104	0.0427758	0.865281	No	NA	NA	NA	NA	NA	NA	NA
TR41332|c1_g1_i1	699.717	263.163	-1.41081	0.0391899	0.849303	No	PREDICTED: scarecrow-like protein 21	Sesamum indicum	NA	NA	NA	NA	NA
TR43599|c0_g1_i2	404.235	152.05	-1.41065	0.0424971	0.863641	No	PREDICTED: sec1 family domain-containing protein MIP3	Sesamum indicum	NA	NA	NA	NA	NA
TR29835|c0_g1_i1	2326.92	875.262	-1.41063	0.0616769	0.941245	No	S-adenosyl-L-methionine synthase	Nicotiana suaveolens	NA	S-adenosylmethionine biosynthetic process[GO:0006556] ; one-carbon metabolic process[GO:0006730]	methionine adenosyltransferase activity[GO:0004478] ; metal ion binding[GO:0046872] ; ATP binding[GO:0005524]	NA	map00270:Cysteine and methionine metabolism(adenosyltransferase[ec:2.5.1.6])
TR32133|c0_g1_i2	108.754	40.9365	-1.4096	0.070123	0.969349	No	PREDICTED: chitinase 6-like	Sesamum indicum	NA	NA	NA	NA	NA
TR38224|c0_g5_i1	108.754	40.9365	-1.4096	0.070123	0.969114	No	hypothetical protein MIMGU_mgv1a005922mg	Mimulus guttatus	NA	NA	NA	NA	NA
TR32777|c0_g1_i1	326.261	122.81	-1.4096	0.0457182	0.87731	No	PREDICTED: uncharacterized protein LOC105169335	Sesamum indicum	NA	NA	NA	NA	NA
TR41569|c0_g2_i4	1346.08	506.833	-1.40918	0.0456195	0.875712	No	PREDICTED: inner membrane protein PPF-1, chloroplastic isoform X2	Sesamum indicum	NA	NA	NA	NA	NA
TR36909|c0_g3_i5	564.288	212.48	-1.4091	0.039805	0.850946	No	PREDICTED: S-antigen protein-like	Sesamum indicum	NA	NA	NA	NA	NA
TR37246|c0_g1_i1	6071.74	2286.6	-1.40891	0.124386	1.07195	No	PREDICTED: protein TIC 62, chloroplastic	Sesamum indicum	NA	NA	NA	NA	NA
TR30860|c1_g3_i5	119.013	44.8353	-1.40842	0.0685534	0.967189	No	PREDICTED: putative GATA transcription factor 22	Sesamum indicum	NA	NA	NA	NA	NA
TR40983|c0_g3_i3	119.013	44.8353	-1.40842	0.0685534	0.966949	No	NA	NA	NA	NA	NA	NA	NA
TR7629|c0_g3_i3	119.013	44.8353	-1.40842	0.0685534	0.967429	No	NA	NA	NA	NA	NA	NA	NA
TR43972|c1_g2_i1	129.273	48.734	-1.40742	0.0668649	0.964938	No	NA	NA	NA	NA	NA	NA	NA
TR34005|c0_g4_i6	129.273	48.734	-1.40742	0.0668649	0.965183	No	NA	NA	NA	NA	NA	NA	NA
TR43705|c0_g1_i15	268.806	101.367	-1.40698	0.0493325	0.902459	No	NA	NA	NA	NA	NA	NA	NA
TR7910|c0_g2_i6	268.806	101.367	-1.40698	0.0493325	0.902168	No	hypothetical protein EUTSA_v10007514mg	Eutrema salsugineum	NA	biosynthetic process[GO:0009058]	pyridoxal phosphate binding[GO:0030170] ; catalytic activity[GO:0003824]	NA	NA
TR33945|c0_g4_i5	1623.1	612.099	-1.40691	0.0502793	0.891358	No	hypothetical protein MIMGU_mgv1a012400mg	Mimulus guttatus	NA	NA	NA	integral component of membrane[GO:0016021]	NA
TR31693|c0_g4_i4	139.533	52.6327	-1.40658	0.0652104	0.958101	No	PREDICTED: uncharacterized protein LOC105170030	Sesamum indicum	NA	NA	NA	NA	NA
TR38392|c0_g6_i3	139.533	52.6327	-1.40658	0.0652104	0.958348	No	PREDICTED: uncharacterized protein LOC105156865 isoform X1	Sesamum indicum	NA	NA	NA	NA	NA
TR39756|c1_g4_i1	2846.06	1074.1	-1.40584	0.0715449	0.975474	No	PREDICTED: UDP-glucuronate 4-epimerase 6	Sesamum indicum	NA	NA	NA	NA	NA
TR31966|c0_g4_i2	929.536	350.885	-1.40551	0.0411505	0.859335	No	hypothetical protein MIMGU_mgv1a010248mg	Mimulus guttatus	NA	NA	NA	NA	NA
TR3524|c0_g1_i4	160.053	60.4301	-1.40521	0.0623207	0.946238	No	hypothetical protein MIMGU_mgv1a010293mg	Mimulus guttatus	NA	transport[GO:0006810]	NA	integral component of membrane[GO:0016021]	NA
TR40395|c1_g1_i1	180.572	68.2276	-1.40415	0.0596157	0.944292	No	NA	NA	NA	NA	NA	NA	NA
TR38691|c2_g1_i1	190.832	72.1263	-1.40371	0.0582506	0.936246	No	vacuolar invertase NvINV	Elsholtzia haichowensis	NA	carbohydrate metabolic process[GO:0005975]	sucrose alpha-glucosidase activity[GO:0004575]	integral component of membrane[GO:0016021]	map00500:Starch and sucrose metabolism(alpha-glucosidase[ec:3.2.1.48]) ; map00500:Starch and sucrose metabolism(invertase[ec:3.2.1.26]) ; map00052:Galactose metabolism(invertase[ec:3.2.1.26])
TR33095|c0_g4_i1	804.367	304.1	-1.40331	0.0405639	0.855895	No	NA	NA	NA	NA	NA	NA	NA
TR39633|c3_g1_i1	10662	4031.27	-1.40317	0.194762	1.12403	No	PREDICTED: peroxisomal (S)-2-hydroxy-acid oxidase GLO1-like isoform X1	Solanum tuberosum	NA	oxidation-reduction process[GO:0055114]	oxidoreductase activity[GO:0016491] ; FMN binding[GO:0010181]	NA	NA
TR26987|c0_g1_i2	849.51	321.644	-1.40117	0.0411377	0.859384	No	NA	NA	NA	NA	NA	NA	NA
TR32986|c0_g1_i1	925.432	350.885	-1.39913	0.0420192	0.860083	No	PREDICTED: xylem cysteine proteinase 2-like	Sesamum indicum	NA	NA	NA	NA	NA
TR41842|c0_g5_i1	570.444	216.379	-1.39853	0.0412058	0.860172	No	PREDICTED: gamma aminobutyrate transaminase 3, chloroplastic isoform X1	Sesamum indicum	NA	NA	NA	NA	NA
TR39787|c0_g1_i4	12837	4871.45	-1.39789	0.226128	1.15257	No	PREDICTED: polyphenol oxidase I, chloroplastic-like	Sesamum indicum	NA	NA	NA	NA	NA
TR33675|c0_g3_i1	82.0783	31.1897	-1.39593	0.0751336	0.984013	No	PREDICTED: ribulose-phosphate 3-epimerase, cytoplasmic isoform isoform X1	Sesamum indicum	NA	NA	NA	NA	NA
TR37841|c0_g6_i6	82.0783	31.1897	-1.39593	0.0751336	0.98424	No	PREDICTED: probable WRKY transcription factor 40	Sesamum indicum	NA	NA	NA	NA	NA
TR41565|c0_g8_i3	82.0783	31.1897	-1.39593	0.0751336	0.983786	No	PREDICTED: protein disulfide isomerase-like 1-4, partial	Populus euphratica	NA	NA	NA	NA	NA
TR40364|c0_g3_i4	71.8185	27.291	-1.39593	0.0749886	0.983247	No	PREDICTED: calcium-dependent protein kinase 10	Sesamum indicum	NA	NA	NA	NA	NA
TR27590|c0_g2_i1	71.8185	27.291	-1.39593	0.0749886	0.983928	No	hypothetical protein MIMGU_mgv1a016344mg	Mimulus guttatus	NA	NA	NA	integral component of membrane[GO:0016021]	NA
TR27837|c0_g1_i1	71.8185	27.291	-1.39593	0.0749886	0.983701	No	hypothetical protein MIMGU_mgv1a007995mg	Mimulus guttatus	NA	mitotic spindle assembly checkpoint[GO:0007094]	NA	NA	NA
TR43131|c1_g1_i3	71.8185	27.291	-1.39593	0.0749886	0.983474	No	NA	NA	NA	NA	NA	NA	NA
TR7583|c2_g1_i9	92.3381	35.0885	-1.39593	0.0748528	0.982828	No	PREDICTED: protein TIFY 10A-like isoform X3	Sesamum indicum	NA	NA	NA	NA	NA
TR8137|c0_g4_i2	92.3381	35.0885	-1.39593	0.0748528	0.983055	No	hypothetical protein MIMGU_mgv1a002705mg	Mimulus guttatus	NA	NA	NA	NA	NA
TR43456|c0_g1_i4	92.3381	35.0885	-1.39593	0.0748528	0.983283	No	unnamed protein product	Vitis vinifera	NA	NA	NA	NA	NA
TR33118|c0_g1_i3	102.598	38.9872	-1.39593	0.0737074	0.979105	No	putative expansin	Capsicum annuum	NA	plant-type cell wall organization[GO:0009664]	NA	extracellular region[GO:0005576] ; cell wall[GO:0005618] ; membrane[GO:0016020]	NA
TR3510|c0_g5_i1	102.598	38.9872	-1.39593	0.0737074	0.978876	No	hypothetical protein MIMGU_mgv1a014086mg	Mimulus guttatus	NA	NA	NA	integral component of membrane[GO:0016021]	NA
TR37022|c0_g2_i1	102.598	38.9872	-1.39593	0.0737074	0.979334	No	PREDICTED: peptide chain release factor PrfB3, chloroplastic isoform X2	Sesamum indicum	NA	NA	NA	NA	NA
TR21281|c0_g1_i1	61.5587	23.3923	-1.39593	0.0731167	0.980199	No	hypothetical protein MIMGU_mgv1a002942mg	Mimulus guttatus	NA	ATP metabolic process[GO:0046034] ; ATP hydrolysis coupled proton transport[GO:0015991]	ATP binding[GO:0005524] ; proton-transporting ATPase activity, rotational mechanism[GO:0046961]	proton-transporting V-type ATPase, V1 domain[GO:0033180]	NA
TR34303|c1_g4_i2	61.5587	23.3923	-1.39593	0.0731167	0.98043	No	hypothetical protein MIMGU_mgv1a010163mg	Mimulus guttatus	NA	NA	NA	integral component of membrane[GO:0016021]	NA
TR29797|c0_g2_i2	61.5587	23.3923	-1.39593	0.0731167	0.980662	No	hypothetical protein MIMGU_mgv1a017491mg	Mimulus guttatus	NA	NA	NA	membrane[GO:0016020]	NA
TR7472|c0_g1_i1	112.858	42.8859	-1.39593	0.0720237	0.978946	No	PREDICTED: uncharacterized protein LOC105171836	Sesamum indicum	NA	NA	NA	NA	NA
TR8242|c1_g3_i2	112.858	42.8859	-1.39593	0.0720237	0.979181	No	PREDICTED: uncharacterized protein LOC105174272 isoform X4	Sesamum indicum	NA	NA	NA	NA	NA
TR34287|c2_g2_i1	123.117	46.7846	-1.39593	0.070134	0.96903	No	PREDICTED: probable pectate lyase 22	Sesamum indicum	NA	NA	NA	NA	NA
TR35041|c0_g4_i2	133.377	50.6833	-1.39593	0.0682372	0.965125	No	PREDICTED: probable ribose-5-phosphate isomerase 3, chloroplastic	Sesamum indicum	NA	NA	NA	NA	NA
TR16747|c0_g1_i1	51.2989	19.4936	-1.39593	0.0665961	0.964489	No	PREDICTED: topless-related protein 3-like isoform X2	Solanum tuberosum	NA	regulation of transcription, DNA-templated[GO:0006355]	NA	NA	NA
TR23657|c0_g1_i1	51.2989	19.4936	-1.39593	0.0665961	0.963506	No	hypothetical protein MIMGU_mgv1a000900mg	Mimulus guttatus	NA	NA	NA	NA	NA
TR27409|c1_g1_i3	51.2989	19.4936	-1.39593	0.0665961	0.963997	No	PREDICTED: coatomer subunit alpha-1	Populus euphratica	NA	NA	NA	NA	NA
TR30166|c0_g3_i5	51.2989	19.4936	-1.39593	0.0665961	0.964735	No	NA	NA	NA	NA	NA	NA	NA
TR31479|c0_g2_i1	51.2989	19.4936	-1.39593	0.0665961	0.963261	No	NA	NA	NA	NA	NA	NA	NA
TR33397|c0_g3_i1	51.2989	19.4936	-1.39593	0.0665961	0.963752	No	NA	NA	NA	NA	NA	NA	NA
TR41198|c1_g4_i1	51.2989	19.4936	-1.39593	0.0665961	0.965227	No	PREDICTED: cytochrome P450 90A1	Sesamum indicum	NA	NA	NA	NA	NA
TR7833|c0_g3_i3	51.2989	19.4936	-1.39593	0.0665961	0.964243	No	NA	NA	NA	NA	NA	NA	NA
TR8035|c0_g2_i7	51.2989	19.4936	-1.39593	0.0665961	0.964981	No	PREDICTED: mitochondrial thiamine pyrophosphate carrier-like isoform X2	Sesamum indicum	NA	NA	NA	NA	NA
TR38918|c0_g3_i4	143.637	54.582	-1.39593	0.0664497	0.96335	No	PREDICTED: uncharacterized protein LOC105159738 isoform X2	Sesamum indicum	NA	NA	NA	NA	NA
TR42410|c0_g2_i1	143.637	54.582	-1.39593	0.0664497	0.963596	No	PREDICTED: multiple C2 and transmembrane domain-containing protein 1-like	Sesamum indicum	NA	NA	NA	NA	NA
TR24537|c0_g1_i2	174.416	66.2782	-1.39593	0.0619167	0.943383	No	PREDICTED: acyl-coenzyme A oxidase 3, peroxisomal-like	Sesamum indicum	NA	NA	NA	NA	NA
TR40373|c0_g2_i2	184.676	70.1769	-1.39593	0.0604385	0.940024	No	PREDICTED: uncharacterized protein LOC105172852	Sesamum indicum	NA	NA	NA	NA	NA
TR8030|c0_g6_i2	184.676	70.1769	-1.39593	0.0604385	0.940282	No	PREDICTED: uncharacterized protein LOC105164273	Sesamum indicum	NA	NA	NA	NA	NA
TR41049|c0_g2_i4	205.196	77.9744	-1.39593	0.0576116	0.935238	No	PREDICTED: uncharacterized protein LOC105160095 isoform X2	Sesamum indicum	NA	NA	NA	NA	NA
TR41849|c0_g3_i4	205.196	77.9744	-1.39593	0.0576116	0.935505	No	PREDICTED: aldehyde dehydrogenase-like	Sesamum indicum	NA	NA	NA	NA	NA
TR7583|c2_g1_i10	215.455	81.8731	-1.39593	0.0563067	0.926231	No	PREDICTED: protein TIFY 10A-like isoform X2	Sesamum indicum	NA	NA	NA	NA	NA
TR28810|c0_g1_i4	41.0391	15.5949	-1.39593	0.0516344	0.896359	No	hypothetical protein M569_07629	Genlisea aurea	NA	NA	NA	integral component of membrane[GO:0016021]	NA
TR34259|c2_g2_i3	41.0391	15.5949	-1.39593	0.0516344	0.894445	No	hypothetical protein MIMGU_mgv1a009676mg	Mimulus guttatus	NA	NA	NA	NA	NA
TR38774|c4_g2_i1	41.0391	15.5949	-1.39593	0.0516344	0.894718	No	hypothetical protein MIMGU_mgv1a014765mg	Mimulus guttatus	NA	NA	NA	NA	NA
TR38915|c2_g2_i3	41.0391	15.5949	-1.39593	0.0516344	0.895538	No	PREDICTED: glucomannan 4-beta-mannosyltransferase 2-like	Sesamum indicum	NA	NA	NA	NA	NA
TR40593|c0_g2_i1	41.0391	15.5949	-1.39593	0.0516344	0.895811	No	PREDICTED: cytochrome P450 81E8-like, partial	Sesamum indicum	NA	NA	NA	NA	NA
TR40863|c0_g1_i6	41.0391	15.5949	-1.39593	0.0516344	0.8939	No	quercetin 3-O-glucoside-6''-O-malonyltransferase	Glandularia x hybrida	NA	NA	NA	NA	NA
TR42061|c0_g5_i1	41.0391	15.5949	-1.39593	0.0516344	0.896085	No	hypothetical protein MIMGU_mgv1a021763mg, partial	Mimulus guttatus	NA	NA	NA	NA	NA
TR43247|c1_g2_i1	41.0391	15.5949	-1.39593	0.0516344	0.894172	No	PREDICTED: probable inactive receptor kinase At4g23740	Sesamum indicum	NA	NA	NA	NA	NA
TR43374|c0_g4_i1	41.0391	15.5949	-1.39593	0.0516344	0.895264	No	PREDICTED: phosphoglucomutase, chloroplastic-like	Populus euphratica	NA	NA	NA	NA	NA
TR33654|c0_g9_i3	41.0391	15.5949	-1.39593	0.0516344	0.894991	No	PREDICTED: uncharacterized protein LOC105179131	Sesamum indicum	NA	NA	NA	NA	NA
TR8068|c1_g4_i1	297.534	113.063	-1.39593	0.0492361	0.901567	No	PREDICTED: uncharacterized protein LOC105168516 isoform X1	Sesamum indicum	NA	NA	NA	NA	NA
TR28765|c0_g1_i4	410.391	155.949	-1.39593	0.0443881	0.870912	No	hypothetical protein MIMGU_mgv1a015532mg	Mimulus guttatus	NA	phosphorelay signal transduction system[GO:0000160]	signal transducer activity[GO:0004871]	intracellular[GO:0005622]	NA
TR44047|c1_g1_i6	410.391	155.949	-1.39593	0.0443881	0.871213	No	PREDICTED: probable xyloglucan glycosyltransferase 12	Sesamum indicum	NA	NA	NA	NA	NA
TR36637|c0_g2_i3	471.95	179.341	-1.39593	0.042831	0.864243	No	glycosyl hydrolase family-like protein	Salvia miltiorrhiza	NA	carbohydrate metabolic process[GO:0005975]	raffinose alpha-galactosidase activity[GO:0052692]	integral component of membrane[GO:0016021]	map00603:Glycosphingolipid biosynthesis - globo series(melibiase[ec:3.2.1.22]) ; map00600:Sphingolipid metabolism(melibiase[ec:3.2.1.22]) ; map00561:Glycerolipid metabolism(melibiase[ec:3.2.1.22]) ; map00052:Galactose metabolism(melibiase[ec:3.2.1.22])
TR36101|c0_g1_i7	697.665	265.113	-1.39593	0.0412288	0.86002	No	PREDICTED: uncharacterized protein LOC105158378	Sesamum indicum	NA	NA	NA	NA	NA
TR33607|c0_g5_i1	30.7794	11.6962	-1.39593	0.0293296	0.789925	No	NA	NA	NA	NA	NA	NA	NA
[truncated: 54,902 more rows]
