# Supplementary material for: Altered Developmental and Metabolic Gene Expression in Basil Interspecific Hybrids
Source: Plants (Basel). 2022 Jul 18;11(14):1873. doi: 10.3390/plants11141873 (PMC9321874; doi:10.3390/plants11141873)
Supplement: Supplementary file 1 [file plants-11-01873-s001.zip › Table S12_DGE_OKP2_vs_AMPHID2.XLSX.xlsx]

## Sheet: AMPHID2_Specific
TrID	AMPHID2_Readcount
TR1002|c0_g1_i1	40
TR10112|c0_g1_i1	46
TR10224|c0_g1_i1	12
TR10233|c0_g1_i1	46
TR10273|c0_g1_i1	22
TR1033|c0_g1_i1	86
TR10332|c0_g1_i1	48
TR10370|c0_g2_i1	22
TR1051|c0_g1_i1	58
TR10582|c0_g1_i1	24
TR10620|c1_g1_i1	476
TR1064|c0_g1_i1	14
TR1073|c0_g1_i1	24
TR10809|c0_g1_i1	100
TR10833|c0_g1_i1	54
TR10841|c0_g1_i1	40
TR11017|c0_g1_i1	28
TR1105|c0_g1_i1	90
TR1107|c0_g1_i1	28
TR11088|c0_g1_i1	14
TR11094|c0_g1_i1	22
TR11161|c0_g1_i1	12
TR11233|c0_g1_i1	82
TR11284|c0_g1_i1	62
TR11454|c0_g1_i1	42
TR11608|c0_g1_i1	20
TR1170|c0_g1_i1	98
TR12140|c0_g1_i1	38
TR1215|c0_g1_i1	68
TR12208|c0_g1_i1	110
TR12213|c0_g2_i1	44
TR1225|c0_g1_i1	64
TR12295|c0_g1_i1	64
TR12459|c0_g1_i1	16
TR12468|c0_g1_i1	42
TR12479|c0_g1_i1	14
TR1251|c0_g1_i1	28
TR12667|c0_g1_i1	38
TR12669|c0_g1_i1	66
TR12715|c0_g1_i1	24
TR1281|c0_g1_i1	26
TR12856|c0_g1_i1	584
TR12868|c0_g1_i1	108
TR12900|c0_g1_i1	110
TR12958|c0_g1_i1	20
TR12988|c0_g1_i1	30
TR1304|c0_g1_i1	74
TR1306|c0_g1_i1	32
TR13218|c0_g1_i1	12
TR13277|c0_g3_i1	18
TR13280|c0_g1_i1	98
TR13314|c0_g1_i1	30
TR13317|c0_g1_i1	52
TR13339|c0_g1_i1	26
TR13349|c0_g1_i1	62
TR13351|c0_g3_i1	56
TR13380|c0_g1_i1	132
TR13443|c0_g1_i1	146
TR13462|c0_g1_i2	16
TR13486|c0_g4_i1	122
TR13495|c0_g1_i1	18
TR1350|c0_g1_i1	30
TR13535|c0_g1_i1	72
TR13551|c0_g1_i1	468
TR13553|c0_g2_i1	64
TR13723|c0_g1_i1	126
TR13868|c0_g1_i1	76
TR13916|c0_g1_i1	14
TR13937|c0_g1_i1	20
TR1396|c0_g1_i1	168
TR13999|c0_g1_i1	22
TR14023|c0_g1_i1	16
TR14079|c0_g1_i1	74
TR14114|c0_g1_i1	136
TR14130|c0_g1_i1	64
TR14146|c0_g1_i1	42
TR14298|c0_g1_i1	56
TR14437|c0_g1_i1	52
TR14441|c0_g1_i1	30
TR14450|c0_g1_i1	26
TR14465|c0_g1_i1	120
TR14490|c0_g1_i1	24
TR14577|c0_g1_i1	26
TR14599|c0_g1_i1	100
TR14609|c0_g1_i1	88
TR1463|c0_g2_i1	32
TR14644|c0_g1_i1	62
TR14694|c0_g1_i1	96
TR14741|c0_g1_i1	18
TR1477|c0_g1_i1	40
TR14770|c0_g1_i1	366
TR1484|c0_g1_i1	40
TR14949|c0_g1_i1	94
TR14972|c0_g1_i1	136
TR14979|c0_g1_i1	126
TR14979|c0_g1_i2	112
TR15038|c0_g1_i1	832
TR15067|c0_g1_i1	46
TR15093|c0_g1_i1	50
TR15132|c0_g1_i1	328
TR15135|c0_g1_i1	16
TR15154|c0_g1_i1	62
TR15179|c0_g1_i1	30
TR1520|c0_g1_i1	20
TR15230|c0_g1_i1	40
TR15242|c0_g1_i1	12
TR15261|c0_g1_i1	22
TR15271|c0_g1_i1	16
TR15315|c0_g1_i1	30
TR15317|c0_g1_i1	26
TR15373|c0_g1_i1	68
TR15413|c0_g1_i1	26
TR15417|c0_g2_i1	72
TR15497|c0_g1_i1	28
TR15545|c0_g1_i1	24
TR15594|c0_g1_i1	14
TR15606|c0_g1_i1	38976
TR15642|c0_g1_i1	32
TR15657|c0_g1_i1	18
TR15815|c0_g1_i1	114
TR15842|c0_g1_i1	82
TR15843|c0_g1_i1	62
TR15853|c0_g1_i1	124
TR15895|c0_g1_i1	20
TR15937|c0_g1_i1	20
TR15957|c0_g1_i1	32
TR15971|c0_g1_i1	14
TR15978|c0_g1_i2	20
TR15990|c0_g1_i1	88
TR15995|c0_g1_i1	64
TR16126|c0_g1_i1	30
TR16136|c0_g1_i1	24
TR16158|c0_g1_i1	62
TR16162|c0_g1_i1	16
TR16180|c0_g1_i1	90
TR16191|c0_g1_i1	80
TR16203|c0_g1_i2	90
TR16221|c0_g1_i1	42
TR16233|c0_g1_i1	60
TR16235|c0_g1_i1	24
TR16247|c0_g1_i1	30
TR16250|c0_g1_i1	126
TR16253|c0_g1_i1	174
TR16272|c0_g1_i1	26
TR16291|c0_g1_i1	44
TR16347|c0_g1_i1	52
TR16449|c0_g1_i2	70
TR16480|c0_g1_i1	254
TR16484|c0_g1_i1	42
TR16551|c0_g1_i1	22
TR16554|c0_g1_i1	16
TR16561|c0_g1_i1	58
TR16585|c0_g1_i2	46
TR16587|c0_g1_i1	34
TR16591|c0_g1_i1	46
TR16604|c0_g1_i1	52
TR16648|c0_g2_i1	104
TR16651|c0_g1_i1	188
TR16660|c0_g1_i1	32
TR1667|c0_g1_i1	1262
TR1667|c0_g1_i5	188
TR1667|c0_g1_i6	350
TR16675|c0_g1_i1	88
TR16704|c0_g1_i1	104
TR16704|c1_g1_i1	134
TR16735|c0_g1_i1	52
TR16745|c0_g1_i2	36
TR16747|c0_g1_i1	36
TR16763|c0_g1_i1	62
TR1691|c0_g1_i1	20
TR16966|c0_g1_i1	24
TR1699|c0_g1_i1	14
TR17041|c0_g1_i1	32
TR17048|c0_g1_i1	20
TR17067|c0_g1_i1	154
TR1707|c0_g2_i1	42
TR17075|c0_g1_i1	80
TR17100|c0_g1_i1	20
TR17121|c0_g1_i1	54
TR17141|c0_g1_i1	14
TR17156|c0_g1_i2	34
TR17169|c0_g1_i1	10
TR17228|c0_g1_i1	352
TR17246|c0_g1_i1	18
TR17259|c0_g1_i1	68
TR17269|c0_g2_i1	3202
TR17271|c0_g1_i1	64
TR17273|c0_g1_i1	30
TR17280|c0_g1_i1	24
TR17313|c0_g1_i1	28
TR17341|c0_g1_i1	26
TR17341|c0_g1_i3	28
TR17345|c0_g1_i1	26
TR17350|c0_g2_i1	26
TR17368|c0_g1_i1	70
TR1738|c0_g1_i1	16
TR17381|c0_g1_i1	172
TR17405|c0_g1_i1	74
TR17426|c0_g1_i1	58
TR17449|c0_g1_i1	50
TR17449|c0_g1_i2	82
TR17454|c0_g1_i1	120
TR17454|c0_g2_i1	32
TR1746|c0_g2_i1	10
TR1746|c0_g3_i1	18
TR17474|c0_g1_i1	20
TR17487|c0_g1_i1	50
TR17495|c0_g1_i1	32
TR17550|c0_g1_i1	102
TR17558|c0_g1_i1	24
TR17581|c0_g1_i1	24
TR17588|c0_g1_i1	46
TR1759|c0_g1_i1	48
TR1760|c0_g1_i2	16
TR17602|c0_g1_i1	32
TR17629|c0_g1_i1	32
TR17644|c0_g2_i2	38
TR17685|c0_g1_i1	70
TR1772|c0_g2_i1	30
TR17730|c0_g1_i1	86
TR17739|c0_g2_i1	58
TR17759|c0_g1_i1	26
TR17767|c0_g1_i1	1152
TR17791|c0_g1_i1	20
TR17801|c0_g1_i1	130
TR17832|c0_g1_i1	126
TR17862|c0_g1_i1	360
TR17865|c0_g1_i1	292
TR17866|c0_g2_i1	194
TR1787|c0_g1_i1	386
TR1788|c0_g1_i1	30
TR17894|c0_g1_i1	24
TR17900|c0_g1_i1	138
TR17911|c0_g1_i1	20
TR17935|c0_g1_i1	24
TR17947|c0_g1_i1	14
TR17955|c0_g1_i1	138
TR17969|c0_g1_i1	36
TR17992|c0_g1_i1	36
TR18016|c0_g1_i1	72
TR18016|c0_g1_i2	346
TR18037|c0_g1_i2	34
TR18046|c0_g1_i1	32
TR18096|c0_g1_i1	22
TR18104|c0_g1_i1	22
TR18111|c0_g1_i1	26
TR18118|c0_g1_i1	34
TR18140|c0_g1_i1	124
TR1816|c0_g1_i1	84
TR18163|c0_g1_i1	62
TR18175|c0_g1_i1	28
TR18179|c0_g1_i1	76
TR18189|c0_g1_i1	38
TR18270|c0_g1_i1	16
TR18273|c0_g1_i1	38
TR18286|c0_g1_i1	56
TR18288|c0_g1_i1	930
TR18306|c0_g1_i1	12
TR18322|c0_g2_i1	28
TR18325|c0_g1_i1	58
TR18351|c0_g1_i1	190
TR18364|c0_g1_i1	54
TR18366|c0_g1_i1	24
TR18408|c0_g1_i1	14
TR18414|c0_g1_i1	70
TR18414|c0_g3_i1	80
TR18417|c0_g1_i1	104
TR18435|c0_g1_i1	58
TR1849|c0_g1_i1	50
TR18497|c0_g1_i1	122
TR18522|c0_g1_i2	66
TR18523|c0_g1_i1	24
TR18527|c0_g4_i1	16
TR18559|c0_g1_i3	38
TR18579|c0_g1_i1	32
TR18595|c0_g1_i1	40
TR18608|c0_g1_i1	20
TR1861|c0_g1_i2	22
TR18620|c0_g1_i1	66
TR18639|c0_g1_i1	34
TR18677|c0_g1_i1	70
TR18682|c0_g1_i1	56
TR18687|c0_g1_i1	24
TR18710|c0_g1_i2	44
TR18723|c0_g1_i2	42
TR18726|c0_g1_i1	34
TR18764|c0_g1_i1	24
TR18771|c0_g1_i1	168
TR18784|c0_g1_i1	44
TR18805|c0_g1_i2	92
TR18807|c0_g1_i1	336
TR18836|c0_g1_i1	294
TR18839|c0_g2_i1	366
TR18847|c0_g1_i1	98
TR18848|c0_g1_i1	24
TR18849|c0_g1_i2	100
TR18888|c0_g1_i1	24
TR18894|c0_g1_i1	34
TR18896|c0_g1_i1	74
TR18900|c1_g1_i1	128
TR18914|c0_g1_i2	298
TR18928|c0_g1_i1	68
TR19006|c0_g1_i1	270
TR19008|c0_g1_i1	256
TR19026|c0_g1_i1	40
TR19030|c0_g1_i2	116
TR19036|c0_g1_i1	20
TR19036|c0_g2_i1	22
TR19040|c0_g1_i1	254
TR19040|c0_g1_i2	34
TR19040|c0_g2_i2	102
TR19054|c0_g1_i1	20
TR19059|c0_g1_i1	116
TR19069|c0_g1_i1	604
TR19108|c0_g1_i1	242
TR19118|c0_g1_i1	38
TR19122|c0_g1_i1	40
TR19137|c0_g1_i2	200
TR19140|c0_g1_i1	494
TR19144|c0_g1_i1	32
TR19149|c0_g1_i1	36
TR19155|c0_g1_i1	188
TR19175|c0_g1_i1	36
TR19193|c0_g1_i1	60
TR1922|c0_g1_i1	18
TR19223|c0_g1_i1	28
TR19229|c0_g1_i1	46
TR19239|c0_g1_i1	50
TR19242|c0_g1_i1	126
TR19244|c0_g1_i1	46
TR19254|c0_g1_i1	118
TR19279|c0_g1_i1	66
TR19288|c0_g1_i1	130
TR19291|c0_g1_i3	286
TR19302|c0_g1_i1	30
TR19303|c0_g1_i1	90
TR19360|c0_g1_i1	58
TR19377|c0_g1_i1	54
TR19383|c0_g1_i2	222
TR19385|c0_g1_i1	20
TR19389|c0_g1_i1	68
TR19435|c0_g1_i1	120
TR19438|c0_g1_i1	28
TR19449|c0_g1_i1	58
TR19470|c0_g1_i1	30
TR19485|c0_g1_i1	66
TR19486|c0_g2_i1	202
TR19488|c0_g1_i1	116
TR19498|c0_g1_i1	52
TR19514|c0_g1_i1	168
TR19514|c0_g1_i2	42
TR19546|c0_g2_i1	38
TR19553|c0_g1_i1	202
TR19561|c0_g1_i1	128
TR19573|c0_g1_i1	50
TR1959|c0_g1_i1	40
TR19591|c0_g1_i1	106
TR19603|c0_g2_i1	54
TR19613|c0_g2_i1	50
TR19631|c0_g2_i1	198
TR19637|c0_g1_i2	144
TR19662|c0_g1_i1	22
TR19685|c0_g1_i1	24
TR19688|c0_g2_i1	1722
TR19716|c0_g1_i1	106
TR19720|c0_g1_i1	16
TR19730|c0_g1_i1	10
TR19734|c0_g1_i1	516
TR19748|c0_g1_i1	46
TR19751|c0_g2_i1	64
TR19773|c0_g1_i1	86
TR19773|c0_g1_i2	52
TR19835|c0_g1_i1	18
TR19839|c0_g1_i1	142
TR19861|c0_g1_i1	20
TR19865|c0_g1_i1	34
TR19875|c0_g1_i2	616
TR19879|c0_g1_i1	108
TR19890|c0_g1_i2	16
TR19890|c0_g1_i3	88
TR19890|c0_g1_i4	32
TR19897|c0_g1_i1	40
TR1990|c0_g1_i1	18
TR19902|c0_g1_i1	10
TR19903|c0_g1_i1	52
TR19914|c0_g1_i1	292
TR19914|c0_g1_i2	178
TR19950|c0_g2_i1	14
TR19961|c0_g1_i1	244
TR19972|c0_g1_i1	20
TR19981|c0_g1_i1	20
TR19984|c0_g1_i1	454
TR20014|c0_g1_i1	972
TR20014|c0_g1_i2	118
TR20021|c0_g1_i1	50
TR20022|c0_g1_i1	66
TR20027|c0_g1_i1	100
TR20032|c0_g1_i1	150
TR20054|c0_g1_i1	74
TR20059|c0_g2_i1	50
TR2006|c0_g1_i1	22
TR20060|c0_g2_i1	34
TR20066|c0_g1_i1	1554
TR20091|c0_g1_i1	114
TR2012|c0_g2_i1	102
TR20124|c0_g2_i1	48
TR20125|c0_g1_i1	12
TR20127|c0_g1_i1	24
TR20137|c0_g1_i2	316
TR20144|c0_g1_i2	178
TR20145|c0_g1_i1	104
TR20160|c0_g1_i1	36
TR20169|c0_g1_i1	158
TR20199|c0_g1_i2	64
TR20200|c0_g1_i1	14
TR20238|c0_g1_i1	38
TR20255|c0_g1_i1	30
TR20263|c0_g1_i2	60
TR20267|c0_g1_i1	86
TR2027|c0_g1_i1	26
TR20276|c0_g1_i2	300
TR20277|c0_g1_i1	88
TR20285|c0_g1_i1	32
TR20294|c0_g1_i1	70
TR20317|c0_g1_i1	164
TR20327|c1_g1_i1	536
TR20328|c0_g1_i1	62
TR20337|c0_g1_i2	66
TR20346|c0_g1_i1	260
TR20347|c1_g1_i1	242
TR2035|c0_g1_i1	30
TR20363|c0_g1_i1	38
TR20363|c0_g1_i2	80
TR20366|c0_g2_i1	336
TR20368|c0_g1_i1	164
TR20371|c0_g1_i1	32
TR20386|c0_g1_i1	50
TR20401|c0_g2_i1	92
TR20410|c0_g1_i1	48
TR20413|c0_g2_i1	258
TR20436|c0_g1_i1	60
TR20442|c0_g1_i1	66
TR20450|c0_g1_i1	54
TR20465|c0_g1_i1	32
TR20467|c0_g2_i1	18
TR20471|c0_g1_i1	218
TR20472|c0_g1_i1	72
TR20472|c0_g1_i2	54
TR20480|c0_g1_i1	60
TR20497|c0_g1_i1	266
TR20504|c0_g1_i1	18
TR2051|c0_g1_i1	16
TR20531|c0_g1_i1	12
TR20532|c0_g1_i1	28
TR20532|c0_g1_i2	66
TR20532|c0_g2_i1	34
TR20537|c0_g1_i1	20
TR20541|c0_g1_i1	18
TR20558|c0_g2_i1	40
TR20559|c0_g1_i1	76
TR20560|c0_g2_i2	10
TR20565|c0_g1_i1	804
TR20566|c0_g1_i1	28
TR20597|c0_g1_i3	70
TR20597|c0_g1_i4	44
TR20613|c0_g1_i1	26
TR20645|c0_g1_i1	62
TR20664|c0_g1_i1	158
TR20669|c0_g1_i1	158
TR20673|c0_g1_i1	64
TR20687|c0_g1_i1	54
TR20689|c0_g1_i1	30
TR20710|c1_g1_i3	52
TR20710|c1_g1_i5	72
TR20714|c0_g1_i4	24
TR20726|c0_g1_i1	38
TR20732|c0_g1_i2	54
TR20733|c0_g1_i1	16
TR20734|c0_g1_i1	20
TR20737|c0_g1_i1	50
TR20740|c0_g1_i2	84
TR20758|c0_g1_i1	208
TR20767|c0_g1_i2	164
TR20773|c0_g1_i2	128
TR20774|c0_g1_i1	40
TR20779|c0_g1_i1	126
TR20784|c0_g1_i1	22
TR20787|c0_g1_i2	36
TR20789|c0_g1_i1	38
TR20791|c0_g1_i1	58
TR20792|c0_g1_i1	100
TR20796|c0_g1_i1	88
TR20796|c0_g1_i3	32
TR20806|c0_g1_i1	64
TR20820|c0_g1_i1	74
TR20839|c0_g1_i2	62
TR20882|c0_g2_i1	34
TR20885|c1_g1_i1	38
TR20887|c0_g1_i1	38
TR20903|c0_g1_i3	78
TR20911|c0_g1_i1	18
TR20913|c0_g1_i1	52
TR20918|c0_g1_i1	310
TR20919|c0_g1_i1	186
TR20941|c0_g1_i1	64
TR2095|c0_g1_i1	16
TR20986|c0_g1_i1	98
TR20986|c0_g1_i2	18
TR20989|c0_g1_i1	20
TR21007|c0_g1_i4	76
TR21008|c0_g1_i2	44
TR21009|c0_g1_i1	20
TR21011|c1_g1_i1	54
TR21023|c0_g1_i1	24
TR21031|c0_g1_i2	532
TR21042|c0_g1_i5	52
TR21046|c0_g1_i2	40
TR21050|c0_g1_i2	60
TR21055|c0_g1_i3	38
TR21055|c0_g1_i4	88
TR21060|c0_g1_i1	44
TR21074|c0_g1_i2	50
TR21081|c0_g1_i1	50
TR21083|c0_g1_i1	32
TR21101|c0_g1_i5	374
TR21104|c0_g1_i1	178
TR21116|c0_g1_i1	32
TR21126|c0_g2_i1	24
TR21129|c0_g1_i1	44
TR21130|c0_g1_i1	156
TR21130|c0_g1_i2	44
TR21132|c0_g1_i2	42
TR21140|c0_g1_i1	30
TR21147|c0_g2_i1	78
TR21148|c0_g1_i1	36
TR21158|c0_g1_i1	34
TR21169|c0_g3_i1	18
TR21177|c0_g1_i1	30
TR21178|c0_g1_i1	422
TR21180|c0_g2_i2	114
TR21190|c0_g1_i1	36
TR21194|c0_g1_i1	50
TR21195|c0_g1_i2	20
TR21217|c0_g1_i1	310
TR21223|c0_g1_i1	84
TR21249|c0_g1_i2	88
TR21261|c0_g1_i1	138
TR21281|c0_g1_i1	48
TR21282|c1_g1_i3	78
TR21282|c2_g1_i1	68
TR21288|c0_g1_i1	128
TR21292|c0_g1_i1	156
TR21294|c0_g1_i1	112
TR21296|c0_g1_i1	28
TR21299|c0_g1_i1	86
TR21323|c0_g1_i2	40
TR2133|c0_g1_i1	54
TR21331|c0_g1_i1	320
TR21342|c0_g1_i1	16
TR21347|c0_g1_i1	26
TR21376|c0_g1_i1	20
TR21383|c0_g2_i1	38
TR21385|c0_g1_i1	106
TR21397|c0_g1_i1	70
TR21406|c0_g1_i3	126
TR21406|c0_g1_i4	112
TR21410|c0_g1_i1	330
TR21411|c0_g1_i1	38
TR21413|c0_g1_i1	18
TR21422|c0_g1_i1	42
TR21433|c0_g1_i1	18
TR21445|c0_g1_i1	38
TR2145|c0_g1_i1	82
TR21450|c0_g1_i1	104
TR21454|c0_g1_i1	254
TR21455|c0_g1_i1	92
TR21456|c0_g1_i1	940
TR21464|c0_g1_i1	104
TR21468|c0_g1_i1	218
TR2149|c0_g1_i1	24
TR21490|c1_g1_i1	94
TR21496|c1_g1_i1	190
TR21496|c1_g1_i2	78
TR21497|c0_g1_i2	46
TR21501|c0_g1_i1	60
TR21513|c0_g1_i1	62
TR21517|c0_g1_i1	44
TR21517|c0_g2_i1	82
TR21522|c0_g2_i1	80
TR21532|c0_g1_i1	1476
TR2157|c0_g1_i3	40
TR2157|c0_g3_i1	92
TR2158|c0_g1_i2	68
TR2159|c0_g1_i1	242
TR2160|c0_g1_i1	22
TR2160|c0_g1_i2	108
TR21606|c0_g1_i1	60
TR2161|c0_g8_i1	860
TR21614|c0_g1_i1	26
TR2163|c0_g1_i1	416
TR2163|c0_g1_i2	334
TR2163|c0_g1_i3	136
TR2163|c0_g3_i1	92
TR2163|c0_g3_i2	80
TR21630|c0_g1_i2	320
TR21633|c0_g1_i1	42
TR21645|c0_g1_i1	20
TR21648|c0_g1_i1	86
TR2165|c0_g1_i1	286
TR2165|c0_g1_i2	140
TR21651|c0_g1_i2	38
TR21658|c0_g1_i1	108
TR2167|c0_g1_i4	98
TR21671|c0_g1_i1	20
TR21678|c0_g1_i1	80
TR21679|c1_g2_i1	20
TR21681|c0_g1_i1	80
TR2169|c0_g3_i1	52
TR2169|c0_g4_i1	48
TR21693|c0_g1_i2	46
TR21697|c0_g1_i1	476
TR21699|c0_g1_i1	452
TR2170|c1_g3_i1	16
TR21701|c0_g1_i1	40
TR21701|c0_g2_i1	14
TR21702|c0_g1_i1	26
TR2171|c0_g1_i1	786
TR2171|c0_g1_i2	334
TR2171|c0_g2_i2	384
TR2171|c0_g2_i4	4352
TR2171|c0_g2_i6	7140
TR21714|c0_g1_i2	32
TR21719|c1_g1_i2	18
TR21723|c0_g1_i1	34
TR21724|c0_g1_i2	44
TR21737|c0_g1_i1	310
TR21743|c0_g1_i1	66
TR21746|c0_g1_i1	22
TR21750|c0_g1_i1	34
TR21751|c0_g1_i1	112
TR21755|c0_g1_i4	86
TR21756|c0_g1_i1	38
TR2176|c0_g1_i1	102
TR2176|c0_g1_i5	88
TR2176|c0_g1_i8	32
TR2176|c0_g4_i1	52
TR21762|c0_g1_i1	78
TR21765|c0_g1_i1	36
TR2177|c0_g1_i2	90
TR21776|c0_g1_i1	20
TR21776|c0_g1_i3	64
TR21776|c0_g2_i1	12
TR2178|c4_g2_i1	90
TR2178|c5_g1_i2	22
TR21781|c0_g1_i1	24
TR21782|c0_g1_i1	24
TR2179|c0_g1_i1	1564
TR2179|c0_g1_i3	836
TR21794|c0_g1_i2	36
TR2180|c0_g1_i3	412
TR2180|c0_g1_i8	422
TR21800|c0_g1_i1	96
TR2181|c0_g2_i1	72
TR21814|c0_g1_i1	92
TR2182|c0_g1_i1	62
TR21823|c0_g1_i1	66
TR21844|c0_g1_i1	134
TR21844|c0_g1_i2	120
TR21846|c0_g1_i1	126
TR21846|c0_g2_i1	138
TR21846|c0_g3_i1	132
TR21846|c0_g4_i1	188
TR21857|c0_g1_i1	44
TR21860|c0_g1_i1	52
TR21870|c0_g1_i1	38
TR21873|c0_g1_i1	72
TR2188|c0_g1_i5	398
TR2188|c0_g1_i6	218
TR2188|c0_g5_i1	58
TR21889|c0_g1_i1	28
TR2189|c0_g1_i1	2220
TR21896|c0_g1_i1	24
TR21902|c0_g1_i1	196
TR2192|c0_g2_i1	272
TR2192|c0_g2_i3	772
TR2192|c0_g2_i4	886
TR2192|c0_g2_i6	86
TR21923|c0_g2_i1	58
TR21923|c0_g2_i2	90
TR2193|c0_g1_i2	70
TR21937|c0_g1_i1	114
TR2194|c0_g1_i2	104
TR2194|c0_g1_i3	276
TR21940|c0_g1_i2	14
TR21946|c0_g1_i1	94
TR21949|c0_g1_i1	98
TR21949|c0_g3_i1	124
TR21949|c0_g3_i2	66
TR2195|c0_g1_i3	1214
TR2195|c0_g1_i4	130
TR2195|c0_g1_i8	820
TR2195|c0_g1_i9	1100
TR21956|c0_g1_i1	190
TR21959|c0_g1_i1	22
TR2196|c0_g1_i1	610
TR2197|c0_g1_i1	96
TR2197|c0_g2_i2	160
TR2197|c0_g2_i4	88
TR21986|c0_g1_i1	46
TR22002|c1_g1_i1	118
TR22002|c1_g1_i5	108
TR22009|c0_g1_i1	680
TR2201|c0_g1_i1	36
TR2201|c0_g3_i1	350
TR2201|c0_g3_i2	158
TR22014|c0_g1_i1	224
TR22023|c0_g1_i1	66
TR22023|c0_g1_i3	28
TR22025|c0_g1_i1	98
TR22036|c0_g2_i1	74
TR22051|c0_g1_i1	52
TR2207|c0_g1_i1	50
TR2207|c0_g1_i2	68
TR2207|c0_g1_i7	44
TR2208|c1_g1_i2	88
TR22084|c0_g1_i1	866
TR22084|c0_g1_i2	84
TR2209|c0_g3_i2	72
TR2209|c0_g3_i3	88
TR22093|c0_g1_i1	80
TR22095|c0_g1_i1	20
TR22098|c0_g1_i2	126
TR22110|c0_g3_i1	54
TR22115|c0_g1_i1	228
TR2212|c1_g1_i1	656
TR2212|c1_g1_i2	308
TR2212|c1_g2_i1	284
TR2212|c1_g2_i2	412
TR22122|c0_g1_i1	46
TR22128|c0_g1_i3	24
TR2213|c0_g1_i1	1266
TR22134|c0_g1_i2	26
TR22136|c0_g1_i1	82
TR2214|c1_g1_i1	70
TR2214|c2_g1_i1	1906
TR2214|c2_g1_i2	2732
TR2214|c3_g2_i1	660
TR2214|c3_g4_i1	432
TR2214|c3_g9_i1	212
TR22158|c0_g1_i1	164
TR2216|c1_g1_i1	36
TR2216|c1_g2_i1	80
TR2216|c1_g5_i1	34
TR22166|c0_g1_i2	54
TR2217|c0_g1_i2	764
TR2217|c1_g1_i2	54
TR2217|c1_g2_i1	510
TR22171|c1_g4_i1	2250
TR2218|c1_g2_i1	26
TR22180|c0_g1_i1	12
TR22194|c0_g1_i1	42
TR22196|c0_g1_i1	44
TR22205|c0_g1_i1	62
TR2221|c0_g1_i2	338
TR22215|c0_g1_i1	200
TR22223|c0_g1_i2	20
TR22225|c0_g1_i1	82
TR2223|c0_g1_i3	76
TR22245|c0_g1_i1	24
TR2225|c1_g11_i1	720
TR2225|c1_g11_i10	110
TR2225|c1_g11_i2	492
TR2225|c1_g11_i5	616
TR2225|c1_g11_i8	196
TR2225|c1_g12_i1	76
TR22251|c0_g1_i1	270
TR22259|c0_g1_i1	16
TR22259|c0_g1_i2	50
TR2226|c0_g1_i1	798
TR2228|c0_g2_i2	270
TR22282|c0_g1_i1	66
TR22286|c0_g1_i1	154
TR22292|c0_g1_i1	44
TR22308|c0_g1_i1	554
TR2231|c0_g1_i1	188
TR22310|c0_g1_i1	120
TR2232|c0_g1_i1	220
TR22333|c0_g1_i1	18
TR22337|c0_g1_i1	50
TR2236|c0_g1_i1	84
TR22370|c0_g1_i1	112
TR22379|c0_g1_i1	494
TR2238|c0_g1_i1	208
TR2238|c0_g1_i4	90
TR22386|c0_g1_i1	352
TR2239|c0_g3_i1	238
TR2239|c0_g3_i3	938
TR2239|c0_g3_i4	146
TR22390|c0_g1_i1	40
TR22408|c0_g1_i1	46
TR22412|c0_g1_i1	154
TR22419|c0_g1_i1	34
TR22423|c0_g1_i1	154
TR2243|c0_g1_i1	72
TR2243|c0_g1_i2	166
TR2243|c0_g2_i1	34
TR22431|c0_g1_i1	36
TR22432|c0_g1_i1	50
TR22435|c0_g1_i1	44
TR22438|c0_g1_i1	42
TR2244|c1_g1_i6	4230
TR2244|c1_g1_i7	906
TR2244|c1_g1_i8	198
TR22440|c0_g1_i2	86
TR22446|c0_g2_i1	54
TR22447|c0_g1_i1	42
TR2245|c4_g1_i1	36
TR2246|c0_g1_i1	538
TR2247|c0_g1_i1	148
TR2248|c0_g1_i2	260
TR2248|c0_g1_i5	186
TR2248|c1_g3_i1	40
TR22493|c0_g1_i1	38
TR2250|c2_g2_i2	160
TR2250|c3_g1_i1	1150
TR2250|c3_g1_i2	212
TR2253|c1_g2_i1	1374
TR22531|c0_g1_i1	110
TR22536|c0_g1_i1	164
TR2254|c0_g1_i1	558
TR2254|c0_g1_i10	146
TR2255|c10_g1_i1	314
TR2255|c10_g3_i3	242
TR2255|c10_g4_i1	66
TR22554|c0_g1_i1	54
TR2256|c0_g1_i2	248
TR2256|c1_g2_i2	50
TR2256|c2_g1_i1	304
TR2256|c3_g1_i1	594
TR2256|c3_g1_i2	194
TR2256|c3_g1_i3	52
TR2256|c3_g1_i9	262
TR22560|c0_g1_i1	46
TR22564|c0_g2_i1	62
TR22581|c0_g1_i2	32
TR22583|c1_g1_i1	20
TR2259|c1_g1_i1	240
TR2259|c1_g1_i3	206
TR22590|c0_g1_i1	52
TR22599|c0_g1_i1	20
TR22599|c0_g2_i1	20
TR2260|c0_g2_i1	234
TR2260|c0_g3_i1	1074
TR2260|c0_g3_i2	550
TR22601|c0_g1_i1	228
TR22608|c1_g1_i3	74
TR2261|c0_g1_i1	208
TR2261|c0_g2_i1	454
TR2261|c0_g2_i3	810
TR2261|c0_g3_i2	454
TR2261|c0_g4_i1	142
TR2261|c0_g5_i1	40
TR22619|c0_g1_i1	124
TR2262|c0_g1_i1	82
TR2262|c0_g7_i1	40
TR2263|c1_g1_i8	630
TR22639|c0_g1_i1	30
TR2264|c0_g1_i2	438
TR2264|c0_g1_i4	214
TR2264|c0_g2_i1	60
TR2265|c0_g4_i1	138
TR22658|c0_g1_i1	272
TR22658|c0_g2_i2	178
TR2266|c0_g1_i1	280
TR2266|c0_g1_i2	850
TR2266|c0_g1_i3	3854
TR22661|c1_g1_i2	1144
TR22678|c0_g1_i2	54
TR22687|c0_g1_i1	58
TR22689|c0_g1_i1	12
TR22689|c0_g3_i1	18
TR22709|c0_g1_i1	40
TR22716|c0_g1_i1	50
TR22724|c0_g1_i1	272
TR22729|c0_g1_i1	132
TR2273|c1_g1_i2	1214
TR2273|c1_g1_i3	948
TR22739|c0_g1_i1	280
TR22739|c0_g2_i1	140
TR22739|c0_g3_i1	610
TR22739|c0_g3_i2	972
TR2274|c0_g1_i3	130
TR22746|c0_g1_i3	112
TR22747|c0_g1_i2	14
TR2277|c0_g1_i1	114
TR2277|c0_g1_i2	20
TR2277|c0_g1_i3	58
TR22774|c0_g1_i2	2196
TR22780|c0_g1_i1	72
TR22789|c0_g1_i1	36
TR2279|c0_g3_i2	80
TR22790|c0_g1_i2	18
TR22792|c0_g1_i1	132
TR22799|c0_g1_i1	32
TR2280|c0_g1_i1	714
TR2280|c0_g4_i2	490
TR22803|c0_g1_i1	18
TR22805|c0_g1_i1	616
TR22817|c0_g2_i1	46
TR2282|c0_g1_i1	76
TR22821|c0_g1_i2	40
TR22823|c0_g1_i2	104
TR22829|c0_g1_i1	140
TR2283|c0_g1_i1	28
TR2283|c0_g5_i1	192
TR22835|c0_g1_i1	24
TR2284|c0_g3_i1	44
TR2284|c0_g5_i1	26
TR22846|c0_g1_i1	128
TR22846|c0_g1_i2	92
TR22855|c0_g1_i2	28
TR22859|c0_g1_i1	50
TR2286|c0_g1_i3	170
TR22863|c0_g1_i1	1606
TR22865|c0_g1_i1	130
TR22869|c0_g1_i1	18
TR22878|c0_g1_i1	48
TR22885|c0_g1_i1	60
TR22885|c0_g2_i1	42
TR22894|c0_g1_i1	128
TR22894|c0_g2_i1	32
TR22896|c0_g1_i3	52
TR2290|c0_g2_i4	54
TR22907|c0_g1_i1	62
TR22910|c0_g1_i1	38
TR22912|c0_g1_i1	138
TR22919|c0_g1_i1	92
TR22919|c0_g1_i2	84
TR22923|c0_g1_i1	22
TR22926|c0_g1_i1	92
TR22928|c0_g1_i1	48
TR2293|c0_g1_i1	94
TR2293|c0_g2_i1	74
TR2293|c0_g2_i2	22
TR22937|c0_g1_i1	62
TR2294|c0_g3_i2	260
TR2294|c0_g3_i3	240
TR2294|c0_g3_i4	186
TR2294|c0_g4_i1	38
TR2294|c0_g4_i3	130
TR2294|c0_g5_i1	62
TR2294|c0_g7_i2	34
TR22942|c0_g2_i1	34
TR22945|c0_g1_i1	30
TR22950|c0_g1_i1	34
TR2296|c0_g3_i1	44
TR2296|c0_g4_i3	140
TR2297|c0_g1_i2	24
TR2297|c0_g2_i2	42
TR2297|c0_g3_i1	694
TR2297|c0_g3_i2	700
TR22975|c0_g1_i1	44
TR22979|c0_g1_i1	86
TR22981|c0_g1_i1	58
TR22982|c0_g1_i1	24
TR2299|c0_g1_i1	960
TR22993|c0_g1_i1	236
TR22995|c0_g1_i2	166
TR22995|c0_g1_i3	64
TR22996|c0_g1_i1	34
TR23003|c0_g1_i1	1344
TR23003|c0_g1_i2	120
TR23004|c0_g1_i1	58
TR23008|c0_g1_i1	464
TR23010|c0_g1_i1	54
TR23026|c0_g1_i1	40
TR2303|c0_g1_i1	72
TR2303|c1_g3_i1	230
TR2303|c1_g3_i10	48
TR2303|c1_g3_i2	82
TR2303|c1_g3_i3	44
TR2303|c1_g3_i4	216
TR2303|c1_g3_i5	172
TR2303|c1_g3_i8	986
TR23035|c0_g1_i1	212
TR2304|c0_g1_i1	260
TR2304|c0_g1_i3	294
TR23041|c0_g1_i1	22
TR23042|c0_g2_i1	62
TR23044|c0_g1_i3	154
TR23047|c0_g2_i1	32
TR23048|c0_g1_i1	74
TR23052|c0_g2_i1	190
TR23059|c0_g1_i3	16
TR2306|c0_g3_i1	96
TR23066|c0_g1_i1	160
TR2307|c0_g1_i1	972
TR23080|c0_g1_i1	70
TR23080|c0_g2_i1	22
TR23088|c0_g1_i3	1934
TR23088|c0_g2_i1	860
TR2309|c0_g1_i3	38
TR23092|c0_g1_i1	36
TR23095|c0_g1_i1	176
TR23099|c0_g1_i1	18
TR2310|c0_g1_i3	68
TR23102|c0_g1_i1	68
TR23104|c0_g1_i1	46
TR23105|c1_g2_i3	40
TR23106|c0_g1_i1	42
TR23106|c1_g1_i1	146
TR2311|c0_g1_i1	192
TR2312|c0_g4_i10	160
TR2312|c0_g4_i5	284
TR23121|c0_g1_i1	204
TR2313|c0_g1_i1	142
TR2313|c0_g1_i2	70
TR23131|c0_g1_i1	124
TR23132|c0_g2_i1	22
TR23134|c1_g1_i1	74
TR23135|c0_g1_i2	92
TR23138|c0_g1_i1	3270
TR2314|c0_g1_i2	48
TR23144|c0_g1_i4	62
TR23144|c0_g1_i5	52
TR23151|c0_g1_i1	24
TR23152|c0_g1_i2	82
TR2316|c0_g1_i1	1416
TR2316|c0_g1_i2	706
TR2316|c0_g1_i4	408
TR23163|c0_g3_i1	62
TR23163|c0_g4_i1	22
TR2317|c1_g1_i1	10166
TR23174|c0_g1_i1	64
TR23174|c0_g2_i1	50
TR2318|c0_g1_i10	558
TR2318|c0_g1_i6	510
TR23182|c0_g2_i2	160
TR23182|c0_g2_i3	492
TR2320|c0_g1_i1	82
TR2320|c0_g5_i1	400
TR2320|c0_g5_i2	244
TR23204|c0_g1_i1	108
TR2321|c0_g1_i1	176
TR2321|c1_g1_i2	540
TR23211|c1_g1_i1	334
TR23211|c1_g1_i2	290
TR23222|c0_g1_i1	94
TR2323|c0_g1_i2	48
TR23231|c0_g1_i1	168
TR2324|c0_g1_i1	222
TR2324|c0_g1_i2	94
TR23247|c0_g3_i2	314
TR23249|c0_g1_i2	186
TR23249|c0_g1_i3	182
TR2325|c0_g1_i2	92
TR23253|c0_g1_i1	98
TR23257|c0_g1_i1	154
TR23258|c0_g1_i1	122
TR2326|c0_g1_i2	22
TR2326|c0_g1_i6	32
TR2326|c0_g1_i8	72
TR2327|c0_g2_i1	362
TR2327|c0_g4_i1	92
TR23274|c0_g1_i2	48
TR23278|c0_g1_i1	72
TR23279|c0_g1_i1	44
TR2328|c0_g1_i1	40
TR2328|c0_g1_i4	96
TR23282|c0_g1_i1	36
TR23283|c0_g1_i1	18
TR23283|c0_g1_i2	30
TR23285|c0_g1_i2	48
TR2329|c0_g2_i1	206
TR2329|c0_g3_i3	162
TR2329|c0_g3_i6	540
TR23294|c0_g1_i1	44
TR23296|c0_g1_i1	34
TR23299|c0_g1_i1	40
TR2330|c0_g1_i2	124
TR23300|c0_g1_i1	402
TR23302|c0_g1_i1	72
TR23304|c0_g1_i1	78
TR23316|c0_g1_i1	286
TR23317|c0_g2_i1	114
TR2332|c0_g1_i3	50
TR23326|c0_g1_i1	96
TR23329|c0_g1_i1	136
TR2333|c0_g1_i1	318
TR23335|c0_g1_i1	34
TR23337|c0_g1_i1	20
TR23337|c0_g2_i1	514
TR23348|c0_g1_i2	198
TR2335|c0_g1_i1	1210
TR2335|c0_g2_i1	152
TR2335|c0_g4_i1	196
TR2336|c1_g1_i6	40
TR23374|c0_g1_i1	26
TR23376|c0_g3_i1	36
TR23376|c0_g4_i1	36
TR23379|c1_g1_i1	192
TR2338|c0_g1_i1	332
TR23382|c0_g1_i1	30
TR23384|c0_g1_i1	62
TR23395|c0_g1_i1	96
TR2340|c0_g1_i5	244
TR2340|c0_g1_i8	360
TR23408|c0_g1_i1	138
TR23408|c0_g1_i2	308
TR23408|c0_g1_i3	138
TR2341|c0_g1_i1	476
TR23413|c0_g1_i1	56
TR23415|c0_g1_i2	22
TR23426|c0_g1_i1	52
TR23426|c0_g2_i1	88
TR2343|c0_g2_i1	410
TR23439|c0_g1_i1	70
TR23442|c0_g1_i1	140
TR23446|c0_g1_i1	90
TR23447|c1_g1_i2	1248
TR23447|c1_g1_i3	196
TR23448|c0_g1_i1	60
TR23450|c0_g1_i2	24
TR23453|c0_g1_i1	34
TR23454|c0_g2_i1	118
TR23456|c0_g1_i1	52
TR2346|c2_g2_i1	186
TR2346|c2_g3_i2	1276
TR2346|c2_g3_i3	382
TR2346|c2_g3_i5	190
TR2346|c2_g3_i6	106
TR2346|c2_g3_i7	78
TR23462|c0_g1_i1	108
TR23463|c0_g1_i1	42
TR23469|c0_g1_i1	200
TR23473|c0_g1_i1	64
TR23476|c0_g1_i1	50
TR2348|c0_g1_i4	160
TR2348|c0_g1_i6	88
TR23480|c0_g1_i1	114
TR23488|c0_g2_i1	22
TR23489|c0_g1_i2	52
TR23489|c0_g1_i3	32
TR2349|c0_g1_i1	20
TR2349|c1_g1_i2	212
TR2349|c1_g1_i6	18
TR2349|c1_g1_i9	336
TR23491|c0_g1_i1	92
TR23491|c1_g1_i1	958
TR2350|c0_g2_i1	380
TR2350|c0_g2_i4	188
TR23503|c0_g1_i1	162
TR23503|c0_g1_i2	100
TR23503|c0_g2_i1	50
TR23508|c0_g2_i1	38
TR2351|c0_g1_i1	24
TR2351|c1_g1_i1	34
TR23510|c0_g1_i2	22
TR23511|c0_g2_i1	358
TR23512|c0_g1_i2	72
TR23516|c0_g1_i1	66
TR23519|c1_g1_i1	160
TR2352|c0_g1_i2	50
TR23520|c0_g1_i1	22
TR23525|c0_g1_i1	30
TR23530|c0_g1_i1	52
TR23533|c0_g1_i15	90
TR23533|c0_g1_i3	102
TR23533|c0_g1_i4	106
TR23533|c0_g1_i7	52
TR23533|c0_g1_i9	98
TR23539|c1_g1_i1	48
TR2354|c0_g1_i2	44
TR23545|c0_g2_i1	24
TR23547|c0_g1_i1	14
TR23563|c0_g1_i1	102
TR23563|c0_g1_i3	56
TR23566|c0_g1_i1	418
TR23584|c0_g1_i1	34
TR2359|c0_g3_i1	60
TR23595|c0_g1_i1	88
TR23596|c0_g1_i1	84
TR23598|c0_g1_i1	56
TR2360|c0_g1_i11	66
TR2360|c0_g1_i8	22
TR23600|c0_g1_i2	110
TR23601|c0_g1_i1	92
TR23601|c0_g2_i1	190
TR23609|c0_g1_i2	54
TR23609|c0_g2_i1	46
TR2361|c2_g1_i1	2316
TR2361|c2_g1_i2	2420
TR2361|c2_g1_i7	2284
TR23610|c0_g1_i1	32
TR23619|c0_g1_i1	32
TR2362|c0_g2_i1	48
TR2362|c0_g2_i3	72
TR23621|c0_g1_i1	98
TR23627|c0_g1_i1	46
TR2363|c1_g1_i4	16
TR23638|c0_g1_i1	486
TR23644|c0_g3_i1	28
TR23657|c0_g1_i1	60
TR23660|c0_g2_i1	24
TR23660|c0_g3_i1	42
TR23664|c0_g1_i1	32
TR2367|c0_g1_i1	206
TR2368|c0_g1_i1	528
TR23681|c0_g1_i1	456
TR23682|c1_g1_i2	136
TR23685|c0_g1_i1	72
TR2369|c0_g5_i1	104
TR23705|c0_g1_i1	32
TR23708|c0_g1_i1	24
TR23719|c0_g3_i1	112
TR2372|c0_g1_i8	166
TR23720|c0_g1_i1	22
TR23721|c0_g1_i1	286
TR23728|c0_g1_i1	266
TR23728|c0_g2_i1	412
TR2373|c0_g1_i1	370
TR2373|c0_g1_i2	936
TR23730|c0_g2_i1	108
TR23743|c0_g1_i1	122
TR23758|c0_g1_i1	44
TR23761|c0_g1_i2	24
TR23762|c0_g1_i1	42
TR23768|c0_g1_i1	116
TR23768|c0_g2_i1	52
TR23768|c0_g3_i1	38
TR23770|c0_g1_i1	68
TR23770|c0_g3_i1	62
TR23773|c0_g1_i1	24
TR23778|c0_g1_i2	556
TR2378|c0_g1_i5	78
TR23783|c0_g1_i1	206
TR23786|c1_g1_i1	106
TR23786|c1_g1_i2	66
TR23786|c1_g2_i1	20
TR23787|c1_g1_i1	120
TR23787|c1_g1_i2	82
TR23787|c1_g1_i3	498
TR23792|c0_g1_i1	106
TR2381|c0_g1_i1	208
TR2381|c0_g1_i2	102
TR23811|c0_g2_i1	88
TR23814|c0_g1_i3	52
TR2382|c0_g1_i1	1476
TR2382|c0_g1_i2	778
TR23821|c0_g1_i1	96
TR23822|c0_g1_i1	24
TR23823|c0_g1_i1	4400
TR2383|c0_g1_i1	626
TR2383|c0_g3_i1	1576
TR2383|c0_g5_i1	2480
TR2383|c0_g6_i1	4112
TR23832|c2_g1_i1	8994
TR23833|c0_g1_i1	136
TR23833|c0_g2_i1	62
TR23833|c0_g2_i2	22
TR2384|c0_g3_i5	108
TR2385|c0_g1_i1	538
TR2385|c0_g1_i4	780
TR2385|c0_g2_i1	20
TR23853|c0_g1_i2	34
TR23854|c0_g3_i2	32
TR2386|c0_g1_i2	36
TR23862|c0_g1_i2	1148
TR23862|c0_g2_i1	330
TR23863|c0_g1_i2	34
TR2387|c0_g1_i1	52
TR23871|c0_g2_i1	52
TR23872|c0_g1_i2	48
TR2389|c0_g1_i1	176
TR23898|c0_g1_i3	96
TR2390|c0_g1_i3	254
TR2390|c0_g1_i4	268
TR23904|c0_g1_i2	24
TR23910|c0_g1_i1	322
TR2392|c0_g2_i1	44
TR23924|c0_g1_i1	22
TR23928|c0_g1_i2	104
TR23928|c0_g1_i6	50
TR2393|c0_g1_i1	782
TR2393|c0_g1_i2	370
TR23931|c0_g1_i1	204
TR23935|c0_g1_i1	446
TR23938|c0_g1_i2	132
TR2394|c0_g2_i10	204
TR23940|c0_g1_i1	474
TR23947|c0_g1_i1	30
TR23947|c0_g3_i2	18
TR23951|c0_g1_i1	34
TR2396|c0_g1_i1	60
TR2396|c0_g1_i4	54
TR23965|c0_g1_i1	34
TR23969|c1_g1_i1	34
TR2397|c0_g1_i2	246
TR2397|c0_g1_i3	230
TR23971|c0_g1_i1	24
TR23972|c0_g1_i1	64
TR23973|c0_g1_i1	222
TR2398|c0_g1_i1	406
TR2398|c0_g1_i2	1520
TR2398|c0_g1_i3	1308
TR23983|c0_g1_i2	24
TR2399|c0_g1_i2	654
TR2399|c0_g1_i3	676
TR23990|c0_g1_i2	38
TR23996|c0_g1_i2	98
TR23997|c0_g1_i1	62
TR23998|c0_g1_i2	46
TR24003|c0_g1_i1	86
TR24004|c0_g1_i1	58
TR24005|c0_g1_i1	52
TR24008|c0_g1_i2	44
TR2401|c0_g1_i2	112
TR2401|c0_g2_i1	74
TR2401|c0_g3_i2	824
TR2401|c0_g3_i3	308
TR24014|c0_g1_i1	496
TR24016|c0_g1_i1	20
TR24021|c1_g1_i1	88
TR24033|c0_g1_i1	38
TR24034|c0_g1_i1	970
TR24035|c1_g2_i2	48
TR2404|c0_g1_i1	1444
TR24046|c0_g1_i1	46
TR24051|c0_g1_i1	88
TR24054|c0_g1_i1	102
TR24065|c0_g1_i1	102
TR2407|c0_g1_i2	70
TR24070|c0_g1_i1	58
TR24075|c0_g1_i2	18
TR2408|c0_g1_i11	300
TR2408|c0_g1_i5	774
TR2408|c0_g1_i6	626
TR24086|c0_g1_i1	26
TR24088|c0_g1_i1	98
TR2409|c0_g4_i2	224
TR24093|c0_g1_i1	28
TR24099|c0_g1_i1	74
TR2410|c0_g1_i2	148
TR2410|c0_g1_i3	42
TR24115|c0_g1_i1	82
TR24121|c0_g1_i1	144
TR24124|c0_g1_i1	306
TR24124|c0_g1_i2	80
TR24127|c0_g1_i1	128
TR2413|c0_g1_i2	122
TR2413|c0_g6_i1	100
TR2413|c0_g7_i1	36
TR24130|c0_g2_i1	56
TR24130|c0_g2_i3	44
TR24132|c0_g1_i1	56
TR24134|c0_g1_i3	210
TR2414|c0_g1_i1	82
TR2414|c0_g1_i2	204
TR2414|c0_g2_i1	934
TR2414|c0_g2_i2	376
TR24140|c0_g1_i1	446
TR24143|c0_g1_i1	106
TR2415|c4_g1_i1	62
TR2415|c4_g2_i1	1042
TR24150|c0_g1_i2	36
TR24155|c0_g1_i1	160
TR24158|c0_g1_i1	78
TR2416|c0_g1_i1	294
TR2416|c0_g2_i1	100
TR2416|c0_g5_i1	952
TR2416|c0_g5_i2	1244
TR24161|c0_g1_i1	56
TR24164|c0_g1_i1	50
TR24165|c0_g1_i1	262
TR2417|c0_g1_i2	62
TR24176|c1_g2_i2	58
TR24177|c3_g1_i1	112
TR24180|c0_g1_i1	704
TR24180|c2_g1_i1	190
TR24180|c2_g1_i2	184
TR24180|c2_g2_i1	70
TR24188|c0_g1_i1	98
TR24199|c0_g1_i1	44
TR24202|c1_g1_i2	774
TR24204|c0_g1_i1	150
TR24205|c0_g1_i1	20
TR24206|c0_g1_i1	62
TR24207|c0_g1_i1	256
TR24211|c0_g2_i1	370
TR24211|c0_g2_i3	280
TR24211|c0_g2_i4	134
TR24211|c0_g4_i1	74
TR24211|c0_g5_i1	72
TR24214|c0_g1_i1	46
TR24221|c0_g1_i3	72
TR2424|c0_g1_i1	250
TR2424|c0_g1_i4	146
TR2424|c0_g1_i5	158
TR2425|c0_g2_i2	102
TR2425|c0_g2_i3	976
TR2425|c0_g2_i7	110
TR2425|c0_g3_i2	716
TR24252|c1_g1_i1	1420
TR2426|c1_g1_i1	264
TR2426|c1_g1_i2	104
TR24262|c0_g1_i2	540
TR24264|c0_g1_i1	48
TR24269|c0_g1_i1	152
TR2427|c0_g1_i1	44
TR24270|c0_g1_i1	106
TR24272|c0_g1_i1	46
TR24278|c0_g1_i1	50
TR2428|c0_g1_i1	116
TR2428|c0_g2_i2	1472
TR2428|c0_g3_i1	48
TR24286|c0_g1_i1	68
TR24286|c0_g2_i1	26
TR24288|c0_g1_i1	38
TR2429|c0_g2_i1	1452
TR2429|c0_g2_i3	300
TR24290|c0_g1_i3	180
TR24292|c0_g1_i1	78
TR24293|c0_g1_i1	46
TR24293|c0_g1_i2	56
TR24299|c0_g2_i1	32
TR2430|c0_g1_i2	296
TR2430|c0_g1_i4	110
TR2430|c0_g1_i5	254
TR2430|c0_g1_i6	26
TR2430|c0_g1_i7	104
TR24301|c0_g1_i1	18
TR24308|c0_g1_i1	52
TR2431|c1_g1_i1	922
TR2431|c1_g1_i2	336
TR24324|c0_g1_i1	124
TR24325|c0_g1_i3	136
TR24331|c0_g1_i1	18
TR24331|c0_g2_i1	38
TR24332|c0_g1_i1	38
TR24334|c0_g1_i1	236
TR24342|c2_g1_i1	178
TR2435|c0_g2_i1	1216
TR2435|c0_g2_i2	548
TR24353|c0_g2_i1	1306
TR24354|c0_g1_i2	552
TR24357|c0_g1_i1	82
TR24362|c0_g1_i1	604
TR24367|c1_g1_i1	82
TR2437|c0_g1_i1	686
TR24370|c0_g1_i1	32
TR2438|c0_g1_i1	96
TR24381|c0_g1_i1	94
TR2439|c0_g1_i1	40
TR2439|c0_g1_i2	54
TR2439|c0_g1_i3	96
TR24390|c0_g1_i3	138
TR24396|c0_g1_i1	24
TR24397|c0_g1_i1	22
TR24397|c1_g1_i2	28
TR24399|c0_g2_i1	122
TR2440|c0_g1_i1	828
TR2440|c0_g1_i3	606
TR24400|c0_g1_i2	120
TR24400|c1_g1_i2	182
TR24401|c0_g2_i1	88
TR2441|c0_g1_i1	68
TR2441|c0_g1_i3	32
TR24410|c0_g1_i1	244
TR24412|c1_g1_i1	20
TR24423|c0_g1_i1	18
TR24424|c0_g1_i1	98
TR24427|c0_g1_i3	98
TR2443|c1_g3_i5	50
TR2443|c1_g3_i8	140
TR2443|c1_g4_i1	130
TR24434|c0_g1_i1	32
TR2444|c0_g1_i2	754
TR2445|c0_g1_i1	110
TR2445|c0_g1_i2	450
TR2445|c0_g1_i3	228
TR2446|c0_g2_i2	22
TR24491|c0_g1_i1	66
TR24494|c0_g2_i1	26
TR24496|c0_g1_i1	96
TR24499|c0_g1_i2	74
TR24499|c0_g1_i3	52
TR24507|c0_g1_i1	82
TR24509|c0_g1_i1	52
TR24514|c0_g1_i2	128
TR24516|c0_g1_i2	74
TR24519|c0_g1_i1	48
TR24521|c0_g1_i1	54
TR24521|c0_g1_i2	146
TR24522|c0_g1_i1	242
TR24523|c0_g1_i1	50
TR24523|c0_g1_i2	84
TR24525|c0_g1_i1	96
TR24532|c0_g1_i1	52
TR24537|c0_g1_i1	52
TR24537|c0_g1_i2	154
TR24538|c0_g1_i1	36
TR24538|c0_g1_i2	66
TR2454|c1_g1_i1	46
TR2454|c1_g1_i3	44
TR2454|c1_g1_i6	72
TR24541|c0_g3_i1	30
TR24545|c0_g1_i1	452
TR2455|c0_g1_i1	172
TR24551|c0_g1_i1	40
TR24551|c1_g1_i3	92
TR24552|c1_g1_i5	70
TR24552|c1_g2_i1	20
TR24555|c0_g1_i1	38
TR24559|c1_g1_i1	86
TR24563|c0_g1_i2	18
TR24566|c0_g1_i2	84
TR2458|c0_g1_i1	84
TR24580|c0_g1_i1	70
TR24582|c0_g1_i1	88
TR24587|c0_g1_i1	40
TR24588|c0_g1_i1	46
TR24589|c0_g1_i1	138
TR2459|c0_g1_i1	120
TR2459|c0_g1_i2	140
TR24593|c0_g1_i8	214
TR24601|c0_g2_i1	134
TR24609|c0_g1_i1	24
TR2462|c0_g1_i3	144
TR2462|c0_g1_i6	202
TR2462|c0_g1_i7	230
TR2462|c0_g3_i1	80
TR2462|c0_g3_i2	138
TR24620|c0_g1_i1	86
TR24620|c0_g1_i3	54
TR24627|c1_g1_i1	18
TR24627|c1_g1_i2	100
TR24627|c1_g1_i5	68
TR2463|c0_g1_i1	312
TR24631|c0_g1_i1	90
TR24638|c0_g1_i1	22
TR2464|c0_g1_i3	46
TR24647|c0_g1_i1	54
TR24648|c0_g1_i1	332
TR24649|c0_g1_i1	50
TR2465|c0_g1_i1	936
TR2465|c0_g1_i2	112
TR2465|c0_g1_i3	224
TR2465|c0_g1_i4	236
TR2465|c0_g1_i7	394
TR24651|c0_g1_i1	64
TR24662|c0_g1_i1	48
TR24668|c0_g1_i1	118
TR24671|c0_g3_i2	34
TR24674|c0_g1_i1	42
TR2468|c1_g3_i1	204
TR2468|c1_g3_i2	146
TR24691|c1_g1_i1	52
TR24694|c0_g2_i1	18
TR2470|c1_g1_i4	108
TR2470|c1_g1_i8	66
TR24701|c0_g1_i1	244
TR24701|c0_g2_i1	54
TR24701|c0_g2_i2	32
TR24708|c0_g2_i1	24
TR2471|c0_g1_i2	1528
TR2471|c0_g1_i4	666
TR24710|c0_g1_i1	22
TR24712|c0_g1_i1	42
TR24716|c0_g1_i1	122
TR24716|c0_g1_i2	334
TR24716|c0_g1_i3	130
TR24719|c0_g1_i1	42
TR24719|c1_g1_i1	78
TR24719|c1_g3_i1	16
TR24722|c0_g1_i1	64
TR24723|c0_g1_i1	158
TR2473|c0_g1_i2	50
TR2473|c0_g1_i3	124
TR24732|c0_g1_i1	40
TR24734|c0_g1_i1	212
TR24734|c0_g2_i1	12
TR24737|c0_g1_i1	104
TR24743|c0_g1_i1	80
TR24743|c0_g2_i1	296
TR2475|c0_g2_i1	144
TR2475|c0_g3_i2	282
TR24755|c0_g1_i2	106
TR24759|c0_g1_i1	58
TR24769|c0_g1_i3	144
TR24769|c0_g1_i4	22
TR2477|c0_g2_i1	74
TR2477|c0_g2_i3	62
TR24786|c0_g1_i1	30
TR2479|c0_g1_i1	158
TR2479|c0_g1_i3	160
TR24790|c0_g2_i1	22
TR24792|c0_g1_i2	1806
TR24792|c0_g1_i3	62
TR24792|c0_g2_i1	108
TR24793|c0_g1_i1	62
TR24795|c0_g1_i2	62
TR24795|c0_g1_i3	446
TR24798|c0_g1_i3	982
TR24798|c0_g2_i1	536
TR24798|c0_g2_i3	564
TR24802|c0_g1_i3	48
TR24806|c0_g4_i2	14
TR24806|c0_g5_i2	24
TR24806|c0_g6_i1	26
TR24808|c0_g1_i1	60
TR24809|c0_g1_i1	140
TR24813|c0_g1_i3	70
TR24814|c1_g1_i4	114
TR24814|c1_g1_i5	518
TR24815|c0_g1_i1	92
TR24831|c0_g1_i1	46
TR24832|c0_g1_i1	76
TR24837|c0_g1_i1	66
TR24848|c0_g1_i3	140
TR2485|c3_g1_i2	1150
TR24852|c0_g1_i2	62
TR24857|c0_g1_i1	508
TR2486|c0_g1_i1	316
TR2486|c0_g1_i2	258
TR2486|c0_g2_i3	906
TR2486|c0_g2_i4	340
TR2486|c0_g3_i1	72
TR24870|c0_g2_i1	28
TR24871|c0_g1_i1	450
TR24887|c0_g1_i1	60
TR24889|c0_g1_i2	46
TR24889|c0_g1_i3	38
TR24901|c0_g1_i1	1910
TR24902|c0_g1_i1	202
TR24905|c0_g1_i1	162
TR2491|c0_g1_i5	126
TR24911|c0_g1_i4	74
TR2492|c0_g2_i2	84
TR24921|c0_g1_i1	48
TR24924|c1_g2_i1	50
TR24926|c0_g1_i1	166
TR24947|c0_g1_i1	188
TR24949|c0_g1_i1	118
TR24949|c0_g1_i2	28
TR24951|c0_g1_i2	26
TR24956|c0_g1_i1	118
TR24961|c0_g1_i1	94
TR24962|c0_g1_i1	96
TR24962|c0_g2_i1	130
TR24964|c0_g1_i2	78
TR24966|c0_g1_i1	72
TR24968|c1_g1_i1	522
TR24968|c1_g2_i2	264
TR24969|c0_g1_i1	80
TR2497|c0_g3_i1	1924
TR2497|c0_g3_i3	654
TR2497|c0_g3_i5	1404
TR2497|c0_g3_i6	758
TR2497|c0_g4_i1	1786
TR24979|c0_g1_i1	318
TR2498|c0_g1_i1	368
TR2498|c0_g2_i1	60
TR2498|c0_g2_i2	68
TR24980|c0_g1_i1	52
TR24981|c0_g1_i2	1250
TR24982|c0_g1_i1	56
TR24987|c0_g1_i1	112
TR24988|c0_g1_i5	130
TR24988|c0_g1_i6	80
TR24989|c0_g1_i1	162
TR2499|c0_g1_i3	488
TR24994|c0_g1_i1	50
TR2500|c0_g1_i4	46
TR25002|c0_g2_i3	88
TR25003|c0_g1_i1	62
TR25017|c0_g1_i1	350
TR25017|c0_g1_i3	384
TR25018|c0_g1_i1	30
TR2502|c0_g1_i1	806
TR25020|c0_g1_i1	24
TR25021|c0_g1_i1	88
TR25024|c0_g1_i3	366
TR25024|c0_g1_i4	142
TR25026|c0_g2_i1	82
TR25031|c0_g1_i1	90
TR25033|c0_g1_i2	102
TR25034|c0_g1_i1	36
TR25034|c0_g1_i2	72
TR25039|c0_g1_i3	716
TR2504|c0_g1_i1	114
TR25043|c0_g1_i1	84
TR25043|c1_g1_i1	56
TR25050|c0_g1_i1	78
TR25054|c0_g2_i1	336
TR25056|c0_g1_i1	118
TR2506|c0_g2_i1	300
TR25060|c0_g1_i1	144
TR25061|c0_g1_i1	32
TR25065|c0_g2_i1	70
TR25068|c0_g1_i1	28
TR25068|c1_g1_i2	42
TR2507|c0_g4_i1	26
TR25083|c0_g1_i3	402
TR25088|c0_g1_i1	34
TR25092|c0_g1_i1	420
TR25092|c0_g2_i1	36
TR25093|c1_g3_i1	272
TR25098|c0_g1_i1	26
TR2510|c0_g2_i4	208
TR2510|c0_g3_i1	66
TR25102|c1_g1_i1	126
TR25109|c0_g1_i1	18
TR25109|c0_g3_i1	78
TR25110|c1_g1_i1	38
TR25115|c0_g1_i2	146
TR25115|c0_g1_i4	30
TR2512|c1_g1_i1	120
TR25121|c0_g1_i1	680
TR25123|c0_g1_i1	58
TR25128|c0_g2_i3	32
TR25128|c0_g2_i4	126
TR2513|c1_g1_i1	224
TR2513|c1_g2_i1	28
TR25134|c0_g1_i1	164
TR2514|c1_g10_i1	116
TR2514|c1_g10_i4	234
TR2514|c1_g10_i5	148
TR2514|c1_g10_i6	80
TR2514|c1_g4_i1	116
TR2514|c1_g4_i2	42
TR2514|c1_g4_i3	96
TR2514|c1_g5_i1	154
TR2514|c1_g9_i1	254
TR2514|c1_g9_i2	338
TR2514|c1_g9_i3	326
TR25142|c0_g1_i1	162
TR25142|c0_g1_i4	232
TR25153|c0_g1_i1	46
TR25156|c0_g1_i1	792
TR2516|c0_g1_i3	306
TR25160|c0_g1_i4	98
TR25163|c0_g1_i1	250
TR2519|c0_g1_i1	140
TR25191|c0_g1_i1	36
TR25193|c0_g1_i1	68
TR25193|c0_g1_i3	70
TR25197|c0_g1_i1	98
TR25198|c0_g1_i1	122
TR25200|c0_g2_i1	38
TR25205|c0_g1_i1	130
TR25208|c0_g1_i2	208
TR2521|c0_g10_i2	60
TR2521|c0_g2_i1	38
TR2521|c0_g3_i2	434
TR2521|c0_g3_i3	630
TR2521|c0_g3_i5	110
TR2521|c0_g4_i2	54
TR25211|c0_g1_i1	52
TR25211|c0_g1_i2	258
TR25213|c0_g1_i1	38
TR25214|c0_g1_i4	22
TR25216|c0_g1_i1	52
TR25216|c0_g2_i2	68
TR25218|c0_g1_i2	290
TR25222|c0_g1_i1	48
TR2523|c0_g1_i2	894
TR2523|c0_g1_i8	470
TR2523|c0_g3_i2	180
TR25232|c0_g1_i1	254
TR25236|c0_g1_i2	264
TR25240|c0_g1_i1	46
TR25247|c0_g1_i2	36
TR25249|c0_g1_i1	196
TR25249|c0_g6_i1	744
TR2525|c0_g1_i1	26
TR2526|c0_g2_i3	158
TR25263|c0_g1_i4	982
TR25268|c0_g1_i1	146
TR25269|c0_g1_i1	42
TR25270|c0_g1_i1	80
TR25272|c0_g1_i1	528
TR25272|c0_g3_i1	56
TR25279|c0_g1_i1	312
TR2528|c3_g1_i3	94
TR25281|c0_g1_i1	82
TR25285|c0_g1_i1	16
TR25291|c0_g1_i1	58
TR25292|c0_g1_i4	54
TR25294|c0_g1_i1	512
TR25295|c0_g2_i1	20
TR2530|c0_g1_i1	38
TR2530|c1_g4_i1	206
TR2530|c1_g4_i2	174
TR2530|c1_g4_i3	380
TR25304|c0_g1_i1	18
TR25304|c1_g1_i1	216
TR25306|c1_g1_i1	2714
TR25306|c1_g1_i2	2568
TR25310|c0_g1_i1	30
TR25311|c0_g1_i2	100
TR25313|c0_g1_i1	1062
TR2532|c0_g4_i1	42
TR2532|c0_g4_i2	172
TR25320|c0_g1_i1	52
TR25321|c0_g1_i2	228
TR25322|c0_g1_i1	536
TR25323|c0_g1_i1	106
TR25324|c0_g1_i1	60
TR25328|c0_g1_i2	152
TR25329|c0_g1_i2	84
TR25329|c0_g1_i3	24
TR25334|c0_g1_i3	94
TR25338|c0_g1_i1	60
TR2534|c0_g3_i1	74
TR2534|c0_g3_i2	30
TR2534|c0_g4_i1	50
TR2534|c0_g4_i3	112
TR25356|c0_g2_i3	114
TR25357|c0_g1_i3	40
TR25358|c0_g1_i5	36
TR2536|c0_g1_i2	228
TR25364|c0_g1_i1	70
TR25369|c0_g1_i1	28
TR2537|c1_g1_i1	284
TR25373|c1_g2_i1	168
TR25373|c1_g2_i3	82
TR25374|c0_g1_i2	94
TR25377|c0_g1_i1	32
TR25379|c0_g2_i1	30
TR25381|c0_g1_i2	116
TR25383|c0_g1_i3	18
TR25383|c0_g1_i4	82
TR25384|c0_g1_i2	94
TR2540|c1_g3_i1	150
TR2540|c2_g1_i1	234
TR2541|c0_g2_i2	208
TR2542|c1_g3_i2	1776
TR2543|c1_g1_i11	278
TR2543|c1_g1_i12	280
TR2543|c1_g1_i14	92
TR2543|c1_g1_i3	70
TR2543|c1_g1_i4	144
TR2544|c0_g1_i10	110
TR2544|c0_g1_i2	170
TR2544|c0_g1_i6	368
TR2544|c0_g5_i1	12
TR2545|c0_g1_i1	116
TR2545|c0_g2_i1	266
TR2545|c0_g2_i2	786
TR2545|c0_g2_i4	530
TR2545|c1_g1_i1	220
TR2545|c1_g2_i1	426
TR2545|c1_g4_i1	322
TR2545|c1_g4_i2	108
TR2546|c0_g2_i1	26
TR2546|c0_g3_i1	154
TR2546|c0_g3_i2	80
TR2547|c0_g1_i1	650
TR2548|c0_g2_i1	60
TR2548|c0_g3_i2	112
TR2548|c0_g4_i1	240
TR25484|c0_g1_i2	116
TR25489|c0_g1_i1	102
TR2549|c0_g1_i1	680
TR2549|c0_g2_i1	382
TR25502|c0_g3_i1	270
TR25502|c0_g3_i2	464
TR25506|c2_g1_i1	112
TR25506|c2_g3_i1	492
TR2551|c0_g1_i4	434
TR25510|c1_g1_i2	38
TR25512|c0_g1_i2	86
TR25514|c0_g1_i1	390
TR25514|c0_g1_i2	228
TR25514|c0_g2_i1	92
TR25517|c0_g1_i3	148
TR25519|c0_g2_i2	28
TR25520|c0_g1_i2	20
TR25521|c0_g1_i1	2016
TR25522|c0_g1_i1	42
TR25525|c1_g2_i1	460
TR25531|c0_g1_i2	56
TR25533|c0_g1_i1	98
TR25536|c0_g1_i1	160
TR25537|c0_g1_i1	46
TR2554|c0_g1_i3	46
TR25544|c1_g1_i1	62
TR25545|c0_g1_i2	66
TR25551|c0_g1_i1	116
TR25553|c0_g1_i1	60
TR25554|c0_g1_i1	364
TR25557|c0_g1_i1	62
TR25557|c0_g1_i2	48
TR25559|c0_g1_i1	124
TR2556|c1_g1_i1	12
TR2556|c1_g2_i1	232
TR25564|c0_g1_i1	52
TR25568|c0_g1_i1	98
TR25569|c0_g3_i1	362
TR25571|c0_g1_i1	40
TR25573|c1_g1_i2	166
TR25573|c1_g1_i4	118
TR25575|c0_g1_i1	1994
TR25577|c0_g1_i1	22
TR25578|c0_g2_i1	2504
TR25586|c0_g1_i1	48
TR25586|c1_g1_i1	20
TR25589|c0_g1_i1	1464
TR2559|c1_g1_i2	702
TR2559|c2_g1_i1	26
TR2559|c2_g2_i1	14
TR2559|c2_g6_i1	138
TR25597|c0_g1_i2	50
TR25598|c0_g2_i1	58
TR2560|c1_g1_i1	34
TR25604|c0_g1_i1	252
TR25605|c0_g1_i1	122
TR25605|c0_g1_i2	96
TR2561|c0_g1_i2	284
TR2561|c0_g1_i3	162
TR25613|c0_g1_i1	104
TR25614|c0_g1_i1	70
TR25616|c0_g1_i2	66
TR25617|c0_g1_i1	130
TR25617|c0_g2_i1	46
TR25629|c0_g2_i1	128
TR25629|c0_g2_i2	28
TR2563|c0_g1_i1	158
TR2563|c0_g2_i1	120
TR2563|c0_g4_i1	40
TR2563|c0_g5_i1	274
TR2563|c0_g6_i1	42
TR2563|c0_g7_i2	232
TR25633|c0_g1_i1	338
TR25636|c0_g1_i10	78
TR25636|c0_g1_i4	62
TR2564|c0_g1_i1	496
TR2564|c0_g1_i4	70
TR2564|c0_g1_i5	1072
TR25647|c1_g1_i1	70
TR25647|c1_g1_i2	26
TR2565|c0_g1_i1	476
TR2565|c0_g2_i1	24
TR25658|c0_g1_i1	66
TR25658|c0_g1_i2	88
TR25658|c0_g2_i1	12
TR25659|c0_g1_i1	200
TR25659|c0_g5_i1	330
TR2566|c0_g1_i3	94
TR25662|c0_g1_i1	22
TR25670|c0_g1_i1	1810
TR25672|c1_g3_i1	20
TR25676|c0_g2_i1	52
TR2568|c0_g1_i1	564
TR25681|c0_g1_i2	252
TR25692|c0_g1_i1	246
TR25693|c0_g1_i1	36
TR25693|c0_g2_i1	168
TR25693|c0_g2_i2	80
TR25696|c0_g1_i2	42
TR2570|c0_g1_i14	72
TR25701|c4_g3_i1	38
TR25702|c0_g1_i1	64
TR25704|c0_g1_i1	1064
TR2571|c0_g1_i3	156
TR2571|c0_g1_i5	1086
TR25715|c0_g1_i1	50
TR25715|c0_g1_i2	72
TR2572|c1_g2_i4	52
TR2572|c1_g2_i5	70
TR2572|c1_g3_i2	176
TR25722|c1_g1_i3	28
TR25723|c0_g1_i1	60
TR25726|c0_g1_i1	58
TR25730|c0_g1_i2	88
TR25732|c0_g1_i1	62
TR25736|c0_g1_i1	50
TR25736|c1_g1_i1	126
TR25741|c0_g1_i3	64
TR25746|c0_g1_i1	700
TR25746|c0_g1_i3	24
TR25747|c0_g3_i2	80
TR2575|c0_g3_i1	192
TR2575|c0_g3_i2	388
TR2575|c0_g6_i1	108
TR25753|c0_g2_i1	42
TR25756|c0_g1_i1	24
TR25762|c0_g1_i2	36
TR25766|c0_g1_i1	178
TR2577|c0_g2_i1	1640
TR2577|c0_g2_i3	166
TR25779|c0_g1_i1	58
TR25779|c0_g1_i2	38
TR25782|c0_g1_i2	34
TR25782|c0_g1_i3	28
TR25787|c1_g1_i1	34
TR25789|c0_g1_i1	178
TR25790|c0_g1_i1	54
TR25791|c0_g1_i3	40
[truncated: 74,564 more rows]

## Sheet: OK_P2 specific
TrID	OK_P2_Readcount
TR1002|c0_g1_i1	58
TR10112|c0_g1_i1	32
TR10224|c0_g1_i1	20
TR10233|c0_g1_i1	66
TR10273|c0_g1_i1	30
TR1033|c0_g1_i1	70
TR10332|c0_g1_i1	64
TR10370|c0_g2_i1	36
TR1051|c0_g1_i1	74
TR10582|c0_g1_i1	16
TR10620|c1_g1_i1	462
TR1064|c0_g1_i1	22
TR1073|c0_g1_i1	18
TR10809|c0_g1_i1	52
TR10833|c0_g1_i1	32
TR10841|c0_g1_i1	70
TR11017|c0_g1_i1	26
TR1105|c0_g1_i1	122
TR1107|c0_g1_i1	28
TR11088|c0_g1_i1	20
TR11094|c0_g1_i1	14
TR11161|c0_g1_i1	12
TR11233|c0_g1_i1	276
TR11284|c0_g1_i1	56
TR11454|c0_g1_i1	42
TR11608|c0_g1_i1	26
TR1170|c0_g1_i1	88
TR12140|c0_g1_i1	40
TR1215|c0_g1_i1	52
TR12208|c0_g1_i1	56
TR12213|c0_g2_i1	48
TR1225|c0_g1_i1	82
TR12295|c0_g1_i1	104
TR12459|c0_g1_i1	18
TR12468|c0_g1_i1	56
TR12479|c0_g1_i1	32
TR1251|c0_g1_i1	36
TR12667|c0_g1_i1	22
TR12669|c0_g1_i1	30
TR12715|c0_g1_i1	28
TR1281|c0_g1_i1	42
TR12856|c0_g1_i1	258
TR12868|c0_g1_i1	88
TR12900|c0_g1_i1	50
TR12958|c0_g1_i1	26
TR12988|c0_g1_i1	24
TR1304|c0_g1_i1	70
TR1306|c0_g1_i1	40
TR13218|c0_g1_i1	18
TR13277|c0_g3_i1	32
TR13280|c0_g1_i1	78
TR13314|c0_g1_i1	24
TR13317|c0_g1_i1	48
TR13339|c0_g1_i1	30
TR13349|c0_g1_i1	72
TR13351|c0_g3_i1	30
TR13380|c0_g1_i1	94
TR13443|c0_g1_i1	158
TR13462|c0_g1_i2	14
TR13486|c0_g4_i1	74
TR13495|c0_g1_i1	14
TR1350|c0_g1_i1	18
TR13535|c0_g1_i1	98
TR13551|c0_g1_i1	274
TR13553|c0_g2_i1	64
TR13723|c0_g1_i1	74
TR13868|c0_g1_i1	64
TR13916|c0_g1_i1	10
TR13937|c0_g1_i1	14
TR1396|c0_g1_i1	92
TR13999|c0_g1_i1	20
TR14023|c0_g1_i1	18
TR14079|c0_g1_i1	34
TR14114|c0_g1_i1	156
TR14130|c0_g1_i1	34
TR14146|c0_g1_i1	26
TR14298|c0_g1_i1	30
TR14437|c0_g1_i1	36
TR14441|c0_g1_i1	52
TR14450|c0_g1_i1	74
TR14465|c0_g1_i1	106
TR14490|c0_g1_i1	26
TR14577|c0_g1_i1	32
TR14599|c0_g1_i1	120
TR14609|c0_g1_i1	46
TR1463|c0_g2_i1	12
TR14644|c0_g1_i1	50
TR14694|c0_g1_i1	22
TR14741|c0_g1_i1	12
TR1477|c0_g1_i1	66
TR14770|c0_g1_i1	156
TR1484|c0_g1_i1	14
TR14949|c0_g1_i1	72
TR14972|c0_g1_i1	132
TR14979|c0_g1_i1	210
TR14979|c0_g1_i2	112
TR15038|c0_g1_i1	614
TR15067|c0_g1_i1	56
TR15093|c0_g1_i1	46
TR15132|c0_g1_i1	346
TR15135|c0_g1_i1	22
TR15154|c0_g1_i1	54
TR15179|c0_g1_i1	30
TR1520|c0_g1_i1	34
TR15230|c0_g1_i1	10
TR15242|c0_g1_i1	16
TR15261|c0_g1_i1	24
TR15271|c0_g1_i1	34
TR15315|c0_g1_i1	24
TR15317|c0_g1_i1	20
TR15373|c0_g1_i1	214
TR15413|c0_g1_i1	24
TR15417|c0_g2_i1	34
TR15497|c0_g1_i1	44
TR15545|c0_g1_i1	28
TR15594|c0_g1_i1	28
TR15606|c0_g1_i1	37306
TR15642|c0_g1_i1	44
TR15657|c0_g1_i1	18
TR15815|c0_g1_i1	126
TR15842|c0_g1_i1	60
TR15843|c0_g1_i1	78
TR15853|c0_g1_i1	186
TR15895|c0_g1_i1	24
TR15937|c0_g1_i1	22
TR15957|c0_g1_i1	24
TR15971|c0_g1_i1	16
TR15978|c0_g1_i2	14
TR15990|c0_g1_i1	100
TR15995|c0_g1_i1	66
TR16126|c0_g1_i1	16
TR16136|c0_g1_i1	42
TR16158|c0_g1_i1	68
TR16162|c0_g1_i1	14
TR16180|c0_g1_i1	62
TR16191|c0_g1_i1	72
TR16203|c0_g1_i2	82
TR16221|c0_g1_i1	38
TR16233|c0_g1_i1	34
TR16235|c0_g1_i1	18
TR16247|c0_g1_i1	20
TR16250|c0_g1_i1	62
TR16253|c0_g1_i1	134
TR16272|c0_g1_i1	32
TR16291|c0_g1_i1	32
TR16347|c0_g1_i1	66
TR16449|c0_g1_i2	74
TR16480|c0_g1_i1	250
TR16484|c0_g1_i1	42
TR16551|c0_g1_i1	36
TR16554|c0_g1_i1	28
TR16561|c0_g1_i1	68
TR16585|c0_g1_i2	14
TR16587|c0_g1_i1	28
TR16591|c0_g1_i1	66
TR16604|c0_g1_i1	32
TR16648|c0_g2_i1	98
TR16651|c0_g1_i1	176
TR16660|c0_g1_i1	42
TR1667|c0_g1_i1	82
TR1667|c0_g1_i5	426
TR1667|c0_g1_i6	152
TR16675|c0_g1_i1	102
TR16704|c0_g1_i1	74
TR16704|c1_g1_i1	24
TR16735|c0_g1_i1	66
TR16745|c0_g1_i2	58
TR16747|c0_g1_i1	20
TR16763|c0_g1_i1	46
TR1691|c0_g1_i1	38
TR16966|c0_g1_i1	36
TR1699|c0_g1_i1	50
TR17041|c0_g1_i1	18
TR17048|c0_g1_i1	30
TR17067|c0_g1_i1	64
TR1707|c0_g2_i1	28
TR17075|c0_g1_i1	124
TR17100|c0_g1_i1	18
TR17121|c0_g1_i1	76
TR17141|c0_g1_i1	12
TR17156|c0_g1_i2	20
TR17169|c0_g1_i1	12
TR17228|c0_g1_i1	506
TR17246|c0_g1_i1	14
TR17259|c0_g1_i1	86
TR17269|c0_g2_i1	792
TR17271|c0_g1_i1	36
TR17273|c0_g1_i1	22
TR17280|c0_g1_i1	62
TR17313|c0_g1_i1	12
TR17341|c0_g1_i1	14
TR17341|c0_g1_i3	24
TR17345|c0_g1_i1	32
TR17350|c0_g2_i1	24
TR17368|c0_g1_i1	56
TR1738|c0_g1_i1	12
TR17381|c0_g1_i1	244
TR17405|c0_g1_i1	74
TR17426|c0_g1_i1	38
TR17449|c0_g1_i1	30
TR17449|c0_g1_i2	56
TR17454|c0_g1_i1	80
TR17454|c0_g2_i1	14
TR1746|c0_g2_i1	12
TR1746|c0_g3_i1	20
TR17474|c0_g1_i1	62
TR17487|c0_g1_i1	56
TR17495|c0_g1_i1	56
TR17550|c0_g1_i1	208
TR17558|c0_g1_i1	22
TR17581|c0_g1_i1	38
TR17588|c0_g1_i1	48
TR1759|c0_g1_i1	60
TR1760|c0_g1_i2	24
TR17602|c0_g1_i1	32
TR17629|c0_g1_i1	38
TR17644|c0_g2_i2	20
TR17685|c0_g1_i1	22
TR1772|c0_g2_i1	40
TR17730|c0_g1_i1	28
TR17739|c0_g2_i1	28
TR17759|c0_g1_i1	30
TR17767|c0_g1_i1	464
TR17791|c0_g1_i1	38
TR17801|c0_g1_i1	112
TR17832|c0_g1_i1	150
TR17862|c0_g1_i1	448
TR17865|c0_g1_i1	278
TR17866|c0_g2_i1	102
TR1787|c0_g1_i1	478
TR1788|c0_g1_i1	48
TR17894|c0_g1_i1	14
TR17900|c0_g1_i1	156
TR17911|c0_g1_i1	30
TR17935|c0_g1_i1	26
TR17947|c0_g1_i1	20
TR17955|c0_g1_i1	154
TR17969|c0_g1_i1	22
TR17992|c0_g1_i1	34
TR18016|c0_g1_i1	62
TR18016|c0_g1_i2	442
TR18037|c0_g1_i2	40
TR18046|c0_g1_i1	58
TR18096|c0_g1_i1	34
TR18104|c0_g1_i1	30
TR18111|c0_g1_i1	28
TR18118|c0_g1_i1	32
TR18140|c0_g1_i1	168
TR1816|c0_g1_i1	28
TR18163|c0_g1_i1	112
TR18175|c0_g1_i1	26
TR18179|c0_g1_i1	86
TR18189|c0_g1_i1	50
TR18270|c0_g1_i1	28
TR18273|c0_g1_i1	40
TR18286|c0_g1_i1	54
TR18288|c0_g1_i1	1476
TR18306|c0_g1_i1	14
TR18322|c0_g2_i1	68
TR18325|c0_g1_i1	38
TR18351|c0_g1_i1	98
TR18364|c0_g1_i1	42
TR18366|c0_g1_i1	18
TR18408|c0_g1_i1	28
TR18414|c0_g1_i1	126
TR18414|c0_g3_i1	124
TR18417|c0_g1_i1	56
TR18435|c0_g1_i1	40
TR1849|c0_g1_i1	76
TR18497|c0_g1_i1	64
TR18522|c0_g1_i2	80
TR18523|c0_g1_i1	18
TR18527|c0_g4_i1	22
TR18559|c0_g1_i3	26
TR18579|c0_g1_i1	24
TR18595|c0_g1_i1	72
TR18608|c0_g1_i1	28
TR1861|c0_g1_i2	20
TR18620|c0_g1_i1	54
TR18639|c0_g1_i1	32
TR18677|c0_g1_i1	110
TR18682|c0_g1_i1	16
TR18687|c0_g1_i1	18
TR18710|c0_g1_i2	44
TR18723|c0_g1_i2	52
TR18726|c0_g1_i1	30
TR18764|c0_g1_i1	38
TR18771|c0_g1_i1	186
TR18784|c0_g1_i1	68
TR18805|c0_g1_i2	64
TR18807|c0_g1_i1	162
TR18836|c0_g1_i1	310
TR18839|c0_g2_i1	144
TR18847|c0_g1_i1	142
TR18848|c0_g1_i1	34
TR18849|c0_g1_i2	68
TR18888|c0_g1_i1	48
TR18894|c0_g1_i1	44
TR18896|c0_g1_i1	100
TR18900|c1_g1_i1	166
TR18914|c0_g1_i2	358
TR18928|c0_g1_i1	38
TR19006|c0_g1_i1	214
TR19008|c0_g1_i1	198
TR19026|c0_g1_i1	20
TR19030|c0_g1_i2	104
TR19036|c0_g1_i1	28
TR19036|c0_g2_i1	28
TR19040|c0_g1_i1	172
TR19040|c0_g1_i2	26
TR19040|c0_g2_i2	50
TR19054|c0_g1_i1	16
TR19059|c0_g1_i1	76
TR19069|c0_g1_i1	28
TR19108|c0_g1_i1	62
TR19118|c0_g1_i1	24
TR19122|c0_g1_i1	34
TR19137|c0_g1_i2	202
TR19140|c0_g1_i1	298
TR19144|c0_g1_i1	38
TR19149|c0_g1_i1	64
TR19155|c0_g1_i1	166
TR19175|c0_g1_i1	26
TR19193|c0_g1_i1	106
TR1922|c0_g1_i1	32
TR19223|c0_g1_i1	26
TR19229|c0_g1_i1	62
TR19239|c0_g1_i1	24
TR19242|c0_g1_i1	104
TR19244|c0_g1_i1	20
TR19254|c0_g1_i1	74
TR19279|c0_g1_i1	66
TR19288|c0_g1_i1	132
TR19291|c0_g1_i3	152
TR19302|c0_g1_i1	20
TR19303|c0_g1_i1	142
TR19360|c0_g1_i1	50
TR19377|c0_g1_i1	50
TR19383|c0_g1_i2	44
TR19385|c0_g1_i1	22
TR19389|c0_g1_i1	54
TR19435|c0_g1_i1	104
TR19438|c0_g1_i1	18
TR19449|c0_g1_i1	56
TR19470|c0_g1_i1	36
TR19485|c0_g1_i1	78
TR19486|c0_g2_i1	118
TR19488|c0_g1_i1	80
TR19498|c0_g1_i1	76
TR19514|c0_g1_i1	66
TR19514|c0_g1_i2	18
TR19546|c0_g2_i1	12
TR19553|c0_g1_i1	540
TR19561|c0_g1_i1	160
TR19573|c0_g1_i1	22
TR1959|c0_g1_i1	18
TR19591|c0_g1_i1	172
TR19603|c0_g2_i1	26
TR19613|c0_g2_i1	40
TR19631|c0_g2_i1	122
TR19637|c0_g1_i2	136
TR19662|c0_g1_i1	34
TR19685|c0_g1_i1	32
TR19688|c0_g2_i1	3090
TR19716|c0_g1_i1	64
TR19720|c0_g1_i1	48
TR19730|c0_g1_i1	10
TR19734|c0_g1_i1	702
TR19748|c0_g1_i1	36
TR19751|c0_g2_i1	36
TR19773|c0_g1_i1	100
TR19773|c0_g1_i2	58
TR19835|c0_g1_i1	36
TR19839|c0_g1_i1	150
TR19861|c0_g1_i1	26
TR19865|c0_g1_i1	22
TR19875|c0_g1_i2	948
TR19879|c0_g1_i1	104
TR19890|c0_g1_i2	26
TR19890|c0_g1_i3	80
TR19890|c0_g1_i4	28
TR19897|c0_g1_i1	44
TR1990|c0_g1_i1	28
TR19902|c0_g1_i1	16
TR19903|c0_g1_i1	24
TR19914|c0_g1_i1	342
TR19914|c0_g1_i2	206
TR19950|c0_g2_i1	38
TR19961|c0_g1_i1	312
TR19972|c0_g1_i1	44
TR19981|c0_g1_i1	14
TR19984|c0_g1_i1	202
TR20014|c0_g1_i1	886
TR20014|c0_g1_i2	102
TR20021|c0_g1_i1	80
TR20022|c0_g1_i1	62
TR20027|c0_g1_i1	102
TR20032|c0_g1_i1	102
TR20054|c0_g1_i1	90
TR20059|c0_g2_i1	42
TR2006|c0_g1_i1	40
TR20060|c0_g2_i1	14
TR20066|c0_g1_i1	1356
TR20091|c0_g1_i1	102
TR2012|c0_g2_i1	92
TR20124|c0_g2_i1	106
TR20125|c0_g1_i1	20
TR20127|c0_g1_i1	44
TR20137|c0_g1_i2	372
TR20144|c0_g1_i2	34
TR20145|c0_g1_i1	104
TR20160|c0_g1_i1	36
TR20169|c0_g1_i1	104
TR20199|c0_g1_i2	28
TR20200|c0_g1_i1	14
TR20238|c0_g1_i1	28
TR20255|c0_g1_i1	22
TR20263|c0_g1_i2	46
TR20267|c0_g1_i1	328
TR2027|c0_g1_i1	34
TR20276|c0_g1_i2	358
TR20277|c0_g1_i1	106
TR20285|c0_g1_i1	12
TR20294|c0_g1_i1	98
TR20317|c0_g1_i1	108
TR20327|c1_g1_i1	458
TR20328|c0_g1_i1	94
TR20337|c0_g1_i2	54
TR20346|c0_g1_i1	86
TR20347|c1_g1_i1	292
TR2035|c0_g1_i1	28
TR20363|c0_g1_i1	28
TR20363|c0_g1_i2	54
TR20366|c0_g2_i1	26
TR20368|c0_g1_i1	182
TR20371|c0_g1_i1	34
TR20386|c0_g1_i1	60
TR20401|c0_g2_i1	24
TR20410|c0_g1_i1	58
TR20413|c0_g2_i1	252
TR20436|c0_g1_i1	14
TR20442|c0_g1_i1	88
TR20450|c0_g1_i1	40
TR20465|c0_g1_i1	58
TR20467|c0_g2_i1	22
TR20471|c0_g1_i1	130
TR20472|c0_g1_i1	74
TR20472|c0_g1_i2	64
TR20480|c0_g1_i1	62
TR20497|c0_g1_i1	230
TR20504|c0_g1_i1	18
TR2051|c0_g1_i1	12
TR20531|c0_g1_i1	10
TR20532|c0_g1_i1	28
TR20532|c0_g1_i2	58
TR20532|c0_g2_i1	42
TR20537|c0_g1_i1	18
TR20541|c0_g1_i1	26
TR20558|c0_g2_i1	26
TR20559|c0_g1_i1	62
TR20560|c0_g2_i2	14
TR20565|c0_g1_i1	604
TR20566|c0_g1_i1	24
TR20597|c0_g1_i3	64
TR20597|c0_g1_i4	54
TR20613|c0_g1_i1	52
TR20645|c0_g1_i1	62
TR20664|c0_g1_i1	314
TR20669|c0_g1_i1	54
TR20673|c0_g1_i1	60
TR20687|c0_g1_i1	38
TR20689|c0_g1_i1	36
TR20710|c1_g1_i3	50
TR20710|c1_g1_i5	50
TR20714|c0_g1_i4	14
TR20726|c0_g1_i1	50
TR20732|c0_g1_i2	28
TR20733|c0_g1_i1	20
TR20734|c0_g1_i1	46
TR20737|c0_g1_i1	30
TR20740|c0_g1_i2	56
TR20758|c0_g1_i1	116
TR20767|c0_g1_i2	44
TR20773|c0_g1_i2	208
TR20774|c0_g1_i1	32
TR20779|c0_g1_i1	154
TR20784|c0_g1_i1	32
TR20787|c0_g1_i2	30
TR20789|c0_g1_i1	46
TR20791|c0_g1_i1	56
TR20792|c0_g1_i1	88
TR20796|c0_g1_i1	70
TR20796|c0_g1_i3	22
TR20806|c0_g1_i1	66
TR20820|c0_g1_i1	46
TR20839|c0_g1_i2	70
TR20882|c0_g2_i1	92
TR20885|c1_g1_i1	40
TR20887|c0_g1_i1	50
TR20903|c0_g1_i3	56
TR20911|c0_g1_i1	34
TR20913|c0_g1_i1	36
TR20918|c0_g1_i1	540
TR20919|c0_g1_i1	46
TR20941|c0_g1_i1	26
TR2095|c0_g1_i1	18
TR20986|c0_g1_i1	42
TR20986|c0_g1_i2	16
TR20989|c0_g1_i1	18
TR21007|c0_g1_i4	68
TR21008|c0_g1_i2	48
TR21009|c0_g1_i1	36
TR21011|c1_g1_i1	22
TR21023|c0_g1_i1	30
TR21031|c0_g1_i2	422
TR21042|c0_g1_i5	62
TR21046|c0_g1_i2	18
TR21050|c0_g1_i2	42
TR21055|c0_g1_i3	28
TR21055|c0_g1_i4	68
TR21060|c0_g1_i1	26
TR21074|c0_g1_i2	40
TR21081|c0_g1_i1	38
TR21083|c0_g1_i1	14
TR21101|c0_g1_i5	606
TR21104|c0_g1_i1	130
TR21116|c0_g1_i1	34
TR21126|c0_g2_i1	22
TR21129|c0_g1_i1	42
TR21130|c0_g1_i1	104
TR21130|c0_g1_i2	24
TR21132|c0_g1_i2	38
TR21140|c0_g1_i1	16
TR21147|c0_g2_i1	102
TR21148|c0_g1_i1	16
TR21158|c0_g1_i1	16
TR21169|c0_g3_i1	16
TR21177|c0_g1_i1	14
TR21178|c0_g1_i1	556
TR21180|c0_g2_i2	70
TR21190|c0_g1_i1	22
TR21194|c0_g1_i1	46
TR21195|c0_g1_i2	22
TR21217|c0_g1_i1	374
TR21223|c0_g1_i1	50
TR21249|c0_g1_i2	32
TR21261|c0_g1_i1	144
TR21281|c0_g1_i1	24
TR21282|c1_g1_i3	90
TR21282|c2_g1_i1	62
TR21288|c0_g1_i1	108
TR21292|c0_g1_i1	96
TR21294|c0_g1_i1	104
TR21296|c0_g1_i1	18
TR21299|c0_g1_i1	60
TR21323|c0_g1_i2	34
TR2133|c0_g1_i1	26
TR21331|c0_g1_i1	274
TR21342|c0_g1_i1	18
TR21347|c0_g1_i1	22
TR21376|c0_g1_i1	36
TR21383|c0_g2_i1	120
TR21385|c0_g1_i1	40
TR21397|c0_g1_i1	92
TR21406|c0_g1_i3	200
TR21406|c0_g1_i4	158
TR21410|c0_g1_i1	270
TR21411|c0_g1_i1	48
TR21413|c0_g1_i1	14
TR21422|c0_g1_i1	42
TR21433|c0_g1_i1	30
TR21445|c0_g1_i1	22
TR2145|c0_g1_i1	80
TR21450|c0_g1_i1	74
TR21454|c0_g1_i1	254
TR21455|c0_g1_i1	90
TR21456|c0_g1_i1	964
TR21464|c0_g1_i1	108
TR21468|c0_g1_i1	382
TR2149|c0_g1_i1	12
TR21490|c1_g1_i1	88
TR21496|c1_g1_i1	302
TR21496|c1_g1_i2	106
TR21497|c0_g1_i2	38
TR21501|c0_g1_i1	54
TR21513|c0_g1_i1	60
TR21517|c0_g1_i1	46
TR21517|c0_g2_i1	84
TR21522|c0_g2_i1	74
TR21532|c0_g1_i1	1234
TR2157|c0_g1_i3	22
TR2157|c0_g3_i1	74
TR2158|c0_g1_i2	56
TR2159|c0_g1_i1	286
TR2160|c0_g1_i1	26
TR2160|c0_g1_i2	134
TR21606|c0_g1_i1	126
TR2161|c0_g8_i1	970
TR21614|c0_g1_i1	68
TR2163|c0_g1_i1	286
TR2163|c0_g1_i2	248
TR2163|c0_g1_i3	98
TR2163|c0_g3_i1	80
TR2163|c0_g3_i2	62
TR21630|c0_g1_i2	152
TR21633|c0_g1_i1	34
TR21645|c0_g1_i1	18
TR21648|c0_g1_i1	60
TR2165|c0_g1_i1	292
TR2165|c0_g1_i2	124
TR21651|c0_g1_i2	40
TR21658|c0_g1_i1	122
TR2167|c0_g1_i4	52
TR21671|c0_g1_i1	16
TR21678|c0_g1_i1	126
TR21679|c1_g2_i1	18
TR21681|c0_g1_i1	94
TR2169|c0_g3_i1	44
TR2169|c0_g4_i1	22
TR21693|c0_g1_i2	56
TR21697|c0_g1_i1	792
TR21699|c0_g1_i1	156
TR2170|c1_g3_i1	34
TR21701|c0_g1_i1	24
TR21701|c0_g2_i1	10
TR21702|c0_g1_i1	38
TR2171|c0_g1_i1	622
TR2171|c0_g1_i2	224
TR2171|c0_g2_i2	596
TR2171|c0_g2_i4	3050
TR2171|c0_g2_i6	5476
TR21714|c0_g1_i2	36
TR21719|c1_g1_i2	20
TR21723|c0_g1_i1	26
TR21724|c0_g1_i2	76
TR21737|c0_g1_i1	176
TR21743|c0_g1_i1	76
TR21746|c0_g1_i1	28
TR21750|c0_g1_i1	12
TR21751|c0_g1_i1	80
TR21755|c0_g1_i4	98
TR21756|c0_g1_i1	56
TR2176|c0_g1_i1	198
TR2176|c0_g1_i5	170
TR2176|c0_g1_i8	16
TR2176|c0_g4_i1	92
TR21762|c0_g1_i1	70
TR21765|c0_g1_i1	32
TR2177|c0_g1_i2	98
TR21776|c0_g1_i1	16
TR21776|c0_g1_i3	56
TR21776|c0_g2_i1	26
TR2178|c4_g2_i1	14
TR2178|c5_g1_i2	22
TR21781|c0_g1_i1	40
TR21782|c0_g1_i1	20
TR2179|c0_g1_i1	1486
TR2179|c0_g1_i3	688
TR21794|c0_g1_i2	36
TR2180|c0_g1_i3	450
TR2180|c0_g1_i8	478
TR21800|c0_g1_i1	38
TR2181|c0_g2_i1	30
TR21814|c0_g1_i1	76
TR2182|c0_g1_i1	38
TR21823|c0_g1_i1	36
TR21844|c0_g1_i1	174
TR21844|c0_g1_i2	186
TR21846|c0_g1_i1	62
TR21846|c0_g2_i1	96
TR21846|c0_g3_i1	90
TR21846|c0_g4_i1	128
TR21857|c0_g1_i1	38
TR21860|c0_g1_i1	42
TR21870|c0_g1_i1	50
TR21873|c0_g1_i1	56
TR2188|c0_g1_i5	670
TR2188|c0_g1_i6	72
TR2188|c0_g5_i1	140
TR21889|c0_g1_i1	22
TR2189|c0_g1_i1	1704
TR21896|c0_g1_i1	34
TR21902|c0_g1_i1	26
TR2192|c0_g2_i1	330
TR2192|c0_g2_i3	986
TR2192|c0_g2_i4	1040
TR2192|c0_g2_i6	186
TR21923|c0_g2_i1	44
TR21923|c0_g2_i2	70
TR2193|c0_g1_i2	70
TR21937|c0_g1_i1	124
TR2194|c0_g1_i2	166
TR2194|c0_g1_i3	434
TR21940|c0_g1_i2	26
TR21946|c0_g1_i1	152
TR21949|c0_g1_i1	74
TR21949|c0_g3_i1	134
TR21949|c0_g3_i2	40
TR2195|c0_g1_i3	1498
TR2195|c0_g1_i4	112
TR2195|c0_g1_i8	1098
TR2195|c0_g1_i9	1302
TR21956|c0_g1_i1	150
TR21959|c0_g1_i1	22
TR2196|c0_g1_i1	554
TR2197|c0_g1_i1	92
TR2197|c0_g2_i2	110
TR2197|c0_g2_i4	48
TR21986|c0_g1_i1	66
TR22002|c1_g1_i1	38
TR22002|c1_g1_i5	70
TR22009|c0_g1_i1	354
TR2201|c0_g1_i1	26
TR2201|c0_g3_i1	298
TR2201|c0_g3_i2	142
TR22014|c0_g1_i1	198
TR22023|c0_g1_i1	112
TR22023|c0_g1_i3	20
TR22025|c0_g1_i1	106
TR22036|c0_g2_i1	76
TR22051|c0_g1_i1	78
TR2207|c0_g1_i1	102
TR2207|c0_g1_i2	106
TR2207|c0_g1_i7	94
TR2208|c1_g1_i2	50
TR22084|c0_g1_i1	950
TR22084|c0_g1_i2	82
TR2209|c0_g3_i2	82
TR2209|c0_g3_i3	22
TR22093|c0_g1_i1	58
TR22095|c0_g1_i1	34
TR22098|c0_g1_i2	62
TR22110|c0_g3_i1	30
TR22115|c0_g1_i1	534
TR2212|c1_g1_i1	430
TR2212|c1_g1_i2	176
TR2212|c1_g2_i1	206
TR2212|c1_g2_i2	238
TR22122|c0_g1_i1	62
TR22128|c0_g1_i3	16
TR2213|c0_g1_i1	894
TR22134|c0_g1_i2	24
TR22136|c0_g1_i1	66
TR2214|c1_g1_i1	36
TR2214|c2_g1_i1	1474
TR2214|c2_g1_i2	2134
TR2214|c3_g2_i1	776
TR2214|c3_g4_i1	244
TR2214|c3_g9_i1	240
TR22158|c0_g1_i1	164
TR2216|c1_g1_i1	32
TR2216|c1_g2_i1	102
TR2216|c1_g5_i1	32
TR22166|c0_g1_i2	60
TR2217|c0_g1_i2	448
TR2217|c1_g1_i2	58
TR2217|c1_g2_i1	380
TR22171|c1_g4_i1	1580
TR2218|c1_g2_i1	16
TR22180|c0_g1_i1	16
TR22194|c0_g1_i1	56
TR22196|c0_g1_i1	52
TR22205|c0_g1_i1	104
TR2221|c0_g1_i2	360
TR22215|c0_g1_i1	146
TR22223|c0_g1_i2	26
TR22225|c0_g1_i1	98
TR2223|c0_g1_i3	82
TR22245|c0_g1_i1	30
TR2225|c1_g11_i1	728
TR2225|c1_g11_i10	54
TR2225|c1_g11_i2	532
TR2225|c1_g11_i5	530
TR2225|c1_g11_i8	168
TR2225|c1_g12_i1	70
TR22251|c0_g1_i1	174
TR22259|c0_g1_i1	34
TR22259|c0_g1_i2	70
TR2226|c0_g1_i1	836
TR2228|c0_g2_i2	74
TR22282|c0_g1_i1	46
TR22286|c0_g1_i1	150
TR22292|c0_g1_i1	38
TR22308|c0_g1_i1	278
TR2231|c0_g1_i1	248
TR22310|c0_g1_i1	148
TR2232|c0_g1_i1	196
TR22333|c0_g1_i1	56
TR22337|c0_g1_i1	48
TR2236|c0_g1_i1	74
TR22370|c0_g1_i1	142
TR22379|c0_g1_i1	274
TR2238|c0_g1_i1	196
TR2238|c0_g1_i4	94
TR22386|c0_g1_i1	278
TR2239|c0_g3_i1	260
TR2239|c0_g3_i3	672
TR2239|c0_g3_i4	202
TR22390|c0_g1_i1	38
TR22408|c0_g1_i1	26
TR22412|c0_g1_i1	112
TR22419|c0_g1_i1	14
TR22423|c0_g1_i1	204
TR2243|c0_g1_i1	40
TR2243|c0_g1_i2	198
TR2243|c0_g2_i1	22
TR22431|c0_g1_i1	14
TR22432|c0_g1_i1	66
TR22435|c0_g1_i1	30
TR22438|c0_g1_i1	30
TR2244|c1_g1_i6	2538
TR2244|c1_g1_i7	548
TR2244|c1_g1_i8	96
TR22440|c0_g1_i2	102
TR22446|c0_g2_i1	60
TR22447|c0_g1_i1	46
TR2245|c4_g1_i1	26
TR2246|c0_g1_i1	486
TR2247|c0_g1_i1	126
TR2248|c0_g1_i2	324
TR2248|c0_g1_i5	212
TR2248|c1_g3_i1	52
TR22493|c0_g1_i1	34
TR2250|c2_g2_i2	118
TR2250|c3_g1_i1	796
TR2250|c3_g1_i2	266
TR2253|c1_g2_i1	1266
TR22531|c0_g1_i1	50
TR22536|c0_g1_i1	102
TR2254|c0_g1_i1	376
TR2254|c0_g1_i10	148
TR2255|c10_g1_i1	1306
TR2255|c10_g3_i3	726
TR2255|c10_g4_i1	394
TR22554|c0_g1_i1	36
TR2256|c0_g1_i2	270
TR2256|c1_g2_i2	16
TR2256|c2_g1_i1	252
TR2256|c3_g1_i1	308
TR2256|c3_g1_i2	186
TR2256|c3_g1_i3	76
TR2256|c3_g1_i9	172
TR22560|c0_g1_i1	42
TR22564|c0_g2_i1	42
TR22581|c0_g1_i2	24
TR22583|c1_g1_i1	28
TR2259|c1_g1_i1	184
TR2259|c1_g1_i3	160
TR22590|c0_g1_i1	64
TR22599|c0_g1_i1	26
TR22599|c0_g2_i1	54
TR2260|c0_g2_i1	300
TR2260|c0_g3_i1	1536
TR2260|c0_g3_i2	212
TR22601|c0_g1_i1	352
TR22608|c1_g1_i3	44
TR2261|c0_g1_i1	162
TR2261|c0_g2_i1	354
TR2261|c0_g2_i3	562
TR2261|c0_g3_i2	398
TR2261|c0_g4_i1	192
TR2261|c0_g5_i1	44
TR22619|c0_g1_i1	96
TR2262|c0_g1_i1	86
TR2262|c0_g7_i1	20
TR2263|c1_g1_i8	176
TR22639|c0_g1_i1	46
TR2264|c0_g1_i2	268
TR2264|c0_g1_i4	122
TR2264|c0_g2_i1	42
TR2265|c0_g4_i1	138
TR22658|c0_g1_i1	286
TR22658|c0_g2_i2	174
TR2266|c0_g1_i1	222
TR2266|c0_g1_i2	1070
TR2266|c0_g1_i3	4118
TR22661|c1_g1_i2	890
TR22678|c0_g1_i2	78
TR22687|c0_g1_i1	22
TR22689|c0_g1_i1	12
TR22689|c0_g3_i1	18
TR22709|c0_g1_i1	76
TR22716|c0_g1_i1	66
TR22724|c0_g1_i1	160
TR22729|c0_g1_i1	112
TR2273|c1_g1_i2	1168
TR2273|c1_g1_i3	1046
TR22739|c0_g1_i1	206
TR22739|c0_g2_i1	48
TR22739|c0_g3_i1	352
TR22739|c0_g3_i2	868
TR2274|c0_g1_i3	112
TR22746|c0_g1_i3	158
TR22747|c0_g1_i2	22
TR2277|c0_g1_i1	80
TR2277|c0_g1_i2	12
TR2277|c0_g1_i3	36
TR22774|c0_g1_i2	1356
TR22780|c0_g1_i1	70
TR22789|c0_g1_i1	44
TR2279|c0_g3_i2	108
TR22790|c0_g1_i2	20
TR22792|c0_g1_i1	142
TR22799|c0_g1_i1	22
TR2280|c0_g1_i1	158
TR2280|c0_g4_i2	478
TR22803|c0_g1_i1	12
TR22805|c0_g1_i1	856
TR22817|c0_g2_i1	58
TR2282|c0_g1_i1	70
TR22821|c0_g1_i2	40
TR22823|c0_g1_i2	52
TR22829|c0_g1_i1	170
TR2283|c0_g1_i1	76
TR2283|c0_g5_i1	178
TR22835|c0_g1_i1	26
TR2284|c0_g3_i1	54
TR2284|c0_g5_i1	30
TR22846|c0_g1_i1	94
TR22846|c0_g1_i2	28
TR22855|c0_g1_i2	28
TR22859|c0_g1_i1	44
TR2286|c0_g1_i3	96
TR22863|c0_g1_i1	1652
TR22865|c0_g1_i1	200
TR22869|c0_g1_i1	26
TR22878|c0_g1_i1	52
TR22885|c0_g1_i1	48
TR22885|c0_g2_i1	18
TR22894|c0_g1_i1	88
TR22894|c0_g2_i1	30
TR22896|c0_g1_i3	44
TR2290|c0_g2_i4	28
TR22907|c0_g1_i1	86
TR22910|c0_g1_i1	36
TR22912|c0_g1_i1	68
TR22919|c0_g1_i1	112
TR22919|c0_g1_i2	98
TR22923|c0_g1_i1	26
TR22926|c0_g1_i1	98
TR22928|c0_g1_i1	28
TR2293|c0_g1_i1	92
TR2293|c0_g2_i1	78
TR2293|c0_g2_i2	32
TR22937|c0_g1_i1	42
TR2294|c0_g3_i2	162
TR2294|c0_g3_i3	204
TR2294|c0_g3_i4	272
TR2294|c0_g4_i1	24
TR2294|c0_g4_i3	58
TR2294|c0_g5_i1	86
TR2294|c0_g7_i2	36
TR22942|c0_g2_i1	28
TR22945|c0_g1_i1	46
TR22950|c0_g1_i1	38
TR2296|c0_g3_i1	38
TR2296|c0_g4_i3	156
TR2297|c0_g1_i2	32
TR2297|c0_g2_i2	70
TR2297|c0_g3_i1	586
TR2297|c0_g3_i2	766
TR22975|c0_g1_i1	56
TR22979|c0_g1_i1	86
TR22981|c0_g1_i1	40
TR22982|c0_g1_i1	24
TR2299|c0_g1_i1	824
TR22993|c0_g1_i1	186
TR22995|c0_g1_i2	62
TR22995|c0_g1_i3	42
TR22996|c0_g1_i1	34
TR23003|c0_g1_i1	1250
TR23003|c0_g1_i2	98
TR23004|c0_g1_i1	100
TR23008|c0_g1_i1	328
TR23010|c0_g1_i1	80
TR23026|c0_g1_i1	32
TR2303|c0_g1_i1	40
TR2303|c1_g3_i1	106
TR2303|c1_g3_i10	32
TR2303|c1_g3_i2	78
TR2303|c1_g3_i3	66
TR2303|c1_g3_i4	132
TR2303|c1_g3_i5	132
TR2303|c1_g3_i8	640
TR23035|c0_g1_i1	186
TR2304|c0_g1_i1	190
TR2304|c0_g1_i3	226
TR23041|c0_g1_i1	24
TR23042|c0_g2_i1	102
TR23044|c0_g1_i3	108
TR23047|c0_g2_i1	14
TR23048|c0_g1_i1	110
TR23052|c0_g2_i1	124
TR23059|c0_g1_i3	20
TR2306|c0_g3_i1	160
TR23066|c0_g1_i1	164
TR2307|c0_g1_i1	972
TR23080|c0_g1_i1	46
TR23080|c0_g2_i1	22
TR23088|c0_g1_i3	1346
TR23088|c0_g2_i1	728
TR2309|c0_g1_i3	32
TR23092|c0_g1_i1	42
TR23095|c0_g1_i1	272
TR23099|c0_g1_i1	16
TR2310|c0_g1_i3	38
TR23102|c0_g1_i1	78
TR23104|c0_g1_i1	52
TR23105|c1_g2_i3	108
TR23106|c0_g1_i1	38
TR23106|c1_g1_i1	148
TR2311|c0_g1_i1	58
TR2312|c0_g4_i10	108
TR2312|c0_g4_i5	258
TR23121|c0_g1_i1	270
TR2313|c0_g1_i1	86
TR2313|c0_g1_i2	40
TR23131|c0_g1_i1	140
TR23132|c0_g2_i1	16
TR23134|c1_g1_i1	26
TR23135|c0_g1_i2	62
TR23138|c0_g1_i1	352
TR2314|c0_g1_i2	62
TR23144|c0_g1_i4	40
TR23144|c0_g1_i5	38
TR23151|c0_g1_i1	30
TR23152|c0_g1_i2	56
TR2316|c0_g1_i1	1466
TR2316|c0_g1_i2	816
TR2316|c0_g1_i4	556
TR23163|c0_g3_i1	64
TR23163|c0_g4_i1	36
TR2317|c1_g1_i1	6540
TR23174|c0_g1_i1	112
TR23174|c0_g2_i1	94
TR2318|c0_g1_i10	1312
TR2318|c0_g1_i6	1302
TR23182|c0_g2_i2	136
TR23182|c0_g2_i3	124
TR2320|c0_g1_i1	84
TR2320|c0_g5_i1	292
TR2320|c0_g5_i2	184
TR23204|c0_g1_i1	148
TR2321|c0_g1_i1	330
TR2321|c1_g1_i2	628
TR23211|c1_g1_i1	264
TR23211|c1_g1_i2	228
TR23222|c0_g1_i1	100
TR2323|c0_g1_i2	56
TR23231|c0_g1_i1	146
TR2324|c0_g1_i1	258
TR2324|c0_g1_i2	118
TR23247|c0_g3_i2	272
TR23249|c0_g1_i2	172
TR23249|c0_g1_i3	250
TR2325|c0_g1_i2	110
TR23253|c0_g1_i1	60
TR23257|c0_g1_i1	152
TR23258|c0_g1_i1	164
TR2326|c0_g1_i2	54
TR2326|c0_g1_i6	86
TR2326|c0_g1_i8	30
TR2327|c0_g2_i1	202
TR2327|c0_g4_i1	100
TR23274|c0_g1_i2	68
TR23278|c0_g1_i1	114
TR23279|c0_g1_i1	42
TR2328|c0_g1_i1	60
TR2328|c0_g1_i4	112
TR23282|c0_g1_i1	28
TR23283|c0_g1_i1	34
TR23283|c0_g1_i2	50
TR23285|c0_g1_i2	44
TR2329|c0_g2_i1	244
TR2329|c0_g3_i3	192
TR2329|c0_g3_i6	474
TR23294|c0_g1_i1	34
TR23296|c0_g1_i1	38
TR23299|c0_g1_i1	48
TR2330|c0_g1_i2	96
TR23300|c0_g1_i1	308
TR23302|c0_g1_i1	34
TR23304|c0_g1_i1	50
TR23316|c0_g1_i1	248
TR23317|c0_g2_i1	52
TR2332|c0_g1_i3	60
TR23326|c0_g1_i1	86
TR23329|c0_g1_i1	170
TR2333|c0_g1_i1	284
TR23335|c0_g1_i1	36
TR23337|c0_g1_i1	22
TR23337|c0_g2_i1	306
TR23348|c0_g1_i2	222
TR2335|c0_g1_i1	876
TR2335|c0_g2_i1	16
TR2335|c0_g4_i1	268
TR2336|c1_g1_i6	42
TR23374|c0_g1_i1	26
TR23376|c0_g3_i1	50
TR23376|c0_g4_i1	26
TR23379|c1_g1_i1	206
TR2338|c0_g1_i1	186
TR23382|c0_g1_i1	42
TR23384|c0_g1_i1	56
TR23395|c0_g1_i1	162
TR2340|c0_g1_i5	230
TR2340|c0_g1_i8	72
TR23408|c0_g1_i1	94
TR23408|c0_g1_i2	146
TR23408|c0_g1_i3	66
TR2341|c0_g1_i1	372
TR23413|c0_g1_i1	54
TR23415|c0_g1_i2	20
TR23426|c0_g1_i1	74
TR23426|c0_g2_i1	56
TR2343|c0_g2_i1	456
TR23439|c0_g1_i1	94
TR23442|c0_g1_i1	168
TR23446|c0_g1_i1	48
TR23447|c1_g1_i2	1408
TR23447|c1_g1_i3	254
TR23448|c0_g1_i1	52
TR23450|c0_g1_i2	38
TR23453|c0_g1_i1	30
TR23454|c0_g2_i1	74
TR23456|c0_g1_i1	76
TR2346|c2_g2_i1	202
TR2346|c2_g3_i2	1176
TR2346|c2_g3_i3	438
TR2346|c2_g3_i5	82
TR2346|c2_g3_i6	212
TR2346|c2_g3_i7	66
TR23462|c0_g1_i1	116
TR23463|c0_g1_i1	18
TR23469|c0_g1_i1	224
TR23473|c0_g1_i1	52
TR23476|c0_g1_i1	46
TR2348|c0_g1_i4	110
TR2348|c0_g1_i6	28
TR23480|c0_g1_i1	134
TR23488|c0_g2_i1	34
TR23489|c0_g1_i2	50
TR23489|c0_g1_i3	26
TR2349|c0_g1_i1	14
TR2349|c1_g1_i2	156
TR2349|c1_g1_i6	44
TR2349|c1_g1_i9	376
TR23491|c0_g1_i1	46
TR23491|c1_g1_i1	412
TR2350|c0_g2_i1	132
TR2350|c0_g2_i4	62
TR23503|c0_g1_i1	74
TR23503|c0_g1_i2	136
TR23503|c0_g2_i1	14
TR23508|c0_g2_i1	26
TR2351|c0_g1_i1	42
TR2351|c1_g1_i1	22
TR23510|c0_g1_i2	26
TR23511|c0_g2_i1	92
TR23512|c0_g1_i2	48
TR23516|c0_g1_i1	46
TR23519|c1_g1_i1	176
TR2352|c0_g1_i2	34
TR23520|c0_g1_i1	20
TR23525|c0_g1_i1	16
TR23530|c0_g1_i1	66
TR23533|c0_g1_i15	72
TR23533|c0_g1_i3	88
TR23533|c0_g1_i4	92
TR23533|c0_g1_i7	56
TR23533|c0_g1_i9	94
TR23539|c1_g1_i1	80
TR2354|c0_g1_i2	48
TR23545|c0_g2_i1	30
TR23547|c0_g1_i1	16
TR23563|c0_g1_i1	84
TR23563|c0_g1_i3	74
TR23566|c0_g1_i1	464
TR23584|c0_g1_i1	24
TR2359|c0_g3_i1	64
TR23595|c0_g1_i1	42
TR23596|c0_g1_i1	90
TR23598|c0_g1_i1	62
TR2360|c0_g1_i11	52
TR2360|c0_g1_i8	30
TR23600|c0_g1_i2	66
TR23601|c0_g1_i1	68
TR23601|c0_g2_i1	122
TR23609|c0_g1_i2	44
TR23609|c0_g2_i1	60
TR2361|c2_g1_i1	360
TR2361|c2_g1_i2	316
TR2361|c2_g1_i7	432
TR23610|c0_g1_i1	24
TR23619|c0_g1_i1	44
TR2362|c0_g2_i1	40
TR2362|c0_g2_i3	54
TR23621|c0_g1_i1	130
TR23627|c0_g1_i1	50
TR2363|c1_g1_i4	28
TR23638|c0_g1_i1	442
TR23644|c0_g3_i1	62
TR23657|c0_g1_i1	20
TR23660|c0_g2_i1	28
TR23660|c0_g3_i1	24
TR23664|c0_g1_i1	14
TR2367|c0_g1_i1	138
TR2368|c0_g1_i1	500
TR23681|c0_g1_i1	186
TR23682|c1_g1_i2	70
TR23685|c0_g1_i1	74
TR2369|c0_g5_i1	198
TR23705|c0_g1_i1	32
TR23708|c0_g1_i1	32
TR23719|c0_g3_i1	52
TR2372|c0_g1_i8	118
TR23720|c0_g1_i1	20
TR23721|c0_g1_i1	242
TR23728|c0_g1_i1	234
TR23728|c0_g2_i1	482
TR2373|c0_g1_i1	400
TR2373|c0_g1_i2	966
TR23730|c0_g2_i1	120
TR23743|c0_g1_i1	70
TR23758|c0_g1_i1	36
TR23761|c0_g1_i2	22
TR23762|c0_g1_i1	26
TR23768|c0_g1_i1	90
TR23768|c0_g2_i1	36
TR23768|c0_g3_i1	46
TR23770|c0_g1_i1	64
TR23770|c0_g3_i1	110
TR23773|c0_g1_i1	20
TR23778|c0_g1_i2	518
TR2378|c0_g1_i5	76
TR23783|c0_g1_i1	172
TR23786|c1_g1_i1	122
TR23786|c1_g1_i2	88
TR23786|c1_g2_i1	36
TR23787|c1_g1_i1	78
TR23787|c1_g1_i2	70
TR23787|c1_g1_i3	124
TR23792|c0_g1_i1	122
TR2381|c0_g1_i1	200
TR2381|c0_g1_i2	50
TR23811|c0_g2_i1	20
TR23814|c0_g1_i3	42
TR2382|c0_g1_i1	738
TR2382|c0_g1_i2	686
TR23821|c0_g1_i1	20
TR23822|c0_g1_i1	30
TR23823|c0_g1_i1	9726
TR2383|c0_g1_i1	970
TR2383|c0_g3_i1	128
TR2383|c0_g5_i1	944
TR2383|c0_g6_i1	1090
TR23832|c2_g1_i1	84
TR23833|c0_g1_i1	92
TR23833|c0_g2_i1	30
TR23833|c0_g2_i2	42
TR2384|c0_g3_i5	116
TR2385|c0_g1_i1	186
TR2385|c0_g1_i4	366
TR2385|c0_g2_i1	14
TR23853|c0_g1_i2	32
TR23854|c0_g3_i2	28
TR2386|c0_g1_i2	36
TR23862|c0_g1_i2	1136
TR23862|c0_g2_i1	338
TR23863|c0_g1_i2	18
TR2387|c0_g1_i1	34
TR23871|c0_g2_i1	40
TR23872|c0_g1_i2	36
TR2389|c0_g1_i1	58
TR23898|c0_g1_i3	34
TR2390|c0_g1_i3	70
TR2390|c0_g1_i4	70
TR23904|c0_g1_i2	32
TR23910|c0_g1_i1	314
TR2392|c0_g2_i1	46
TR23924|c0_g1_i1	20
TR23928|c0_g1_i2	28
TR23928|c0_g1_i6	32
TR2393|c0_g1_i1	498
TR2393|c0_g1_i2	404
TR23931|c0_g1_i1	180
TR23935|c0_g1_i1	570
TR23938|c0_g1_i2	78
TR2394|c0_g2_i10	184
TR23940|c0_g1_i1	94
TR23947|c0_g1_i1	28
TR23947|c0_g3_i2	34
TR23951|c0_g1_i1	28
TR2396|c0_g1_i1	38
TR2396|c0_g1_i4	88
TR23965|c0_g1_i1	18
TR23969|c1_g1_i1	50
TR2397|c0_g1_i2	320
TR2397|c0_g1_i3	298
TR23971|c0_g1_i1	38
TR23972|c0_g1_i1	90
TR23973|c0_g1_i1	314
TR2398|c0_g1_i1	260
TR2398|c0_g1_i2	1046
TR2398|c0_g1_i3	1380
TR23983|c0_g1_i2	20
TR2399|c0_g1_i2	924
TR2399|c0_g1_i3	954
TR23990|c0_g1_i2	16
TR23996|c0_g1_i2	42
TR23997|c0_g1_i1	26
TR23998|c0_g1_i2	34
TR24003|c0_g1_i1	82
TR24004|c0_g1_i1	42
TR24005|c0_g1_i1	46
TR24008|c0_g1_i2	22
TR2401|c0_g1_i2	78
TR2401|c0_g2_i1	50
TR2401|c0_g3_i2	820
TR2401|c0_g3_i3	328
TR24014|c0_g1_i1	378
TR24016|c0_g1_i1	14
TR24021|c1_g1_i1	34
TR24033|c0_g1_i1	30
TR24034|c0_g1_i1	654
TR24035|c1_g2_i2	120
TR2404|c0_g1_i1	872
TR24046|c0_g1_i1	54
TR24051|c0_g1_i1	140
TR24054|c0_g1_i1	112
TR24065|c0_g1_i1	112
TR2407|c0_g1_i2	80
TR24070|c0_g1_i1	58
TR24075|c0_g1_i2	26
TR2408|c0_g1_i11	310
TR2408|c0_g1_i5	700
TR2408|c0_g1_i6	632
TR24086|c0_g1_i1	24
TR24088|c0_g1_i1	142
TR2409|c0_g4_i2	162
TR24093|c0_g1_i1	32
TR24099|c0_g1_i1	90
TR2410|c0_g1_i2	124
TR2410|c0_g1_i3	44
TR24115|c0_g1_i1	40
TR24121|c0_g1_i1	162
TR24124|c0_g1_i1	238
TR24124|c0_g1_i2	94
TR24127|c0_g1_i1	48
TR2413|c0_g1_i2	138
TR2413|c0_g6_i1	142
TR2413|c0_g7_i1	20
TR24130|c0_g2_i1	68
TR24130|c0_g2_i3	44
TR24132|c0_g1_i1	58
TR24134|c0_g1_i3	80
TR2414|c0_g1_i1	220
TR2414|c0_g1_i2	154
TR2414|c0_g2_i1	1358
TR2414|c0_g2_i2	678
TR24140|c0_g1_i1	406
TR24143|c0_g1_i1	126
TR2415|c4_g1_i1	186
TR2415|c4_g2_i1	836
TR24150|c0_g1_i2	28
TR24155|c0_g1_i1	158
TR24158|c0_g1_i1	46
TR2416|c0_g1_i1	86
TR2416|c0_g2_i1	72
TR2416|c0_g5_i1	508
TR2416|c0_g5_i2	594
TR24161|c0_g1_i1	34
TR24164|c0_g1_i1	22
TR24165|c0_g1_i1	436
TR2417|c0_g1_i2	222
TR24176|c1_g2_i2	28
TR24177|c3_g1_i1	70
TR24180|c0_g1_i1	710
TR24180|c2_g1_i1	262
TR24180|c2_g1_i2	200
TR24180|c2_g2_i1	48
TR24188|c0_g1_i1	86
TR24199|c0_g1_i1	58
TR24202|c1_g1_i2	768
TR24204|c0_g1_i1	92
TR24205|c0_g1_i1	18
TR24206|c0_g1_i1	108
TR24207|c0_g1_i1	262
TR24211|c0_g2_i1	342
TR24211|c0_g2_i3	320
TR24211|c0_g2_i4	112
TR24211|c0_g4_i1	80
TR24211|c0_g5_i1	70
TR24214|c0_g1_i1	52
TR24221|c0_g1_i3	52
TR2424|c0_g1_i1	258
TR2424|c0_g1_i4	122
TR2424|c0_g1_i5	122
TR2425|c0_g2_i2	50
TR2425|c0_g2_i3	394
TR2425|c0_g2_i7	104
TR2425|c0_g3_i2	612
TR24252|c1_g1_i1	964
TR2426|c1_g1_i1	254
TR2426|c1_g1_i2	46
TR24262|c0_g1_i2	568
TR24264|c0_g1_i1	18
TR24269|c0_g1_i1	80
TR2427|c0_g1_i1	46
TR24270|c0_g1_i1	86
TR24272|c0_g1_i1	38
TR24278|c0_g1_i1	22
TR2428|c0_g1_i1	66
TR2428|c0_g2_i2	1212
TR2428|c0_g3_i1	22
TR24286|c0_g1_i1	78
TR24286|c0_g2_i1	30
TR24288|c0_g1_i1	40
TR2429|c0_g2_i1	1380
TR2429|c0_g2_i3	310
TR24290|c0_g1_i3	174
TR24292|c0_g1_i1	100
TR24293|c0_g1_i1	44
TR24293|c0_g1_i2	60
TR24299|c0_g2_i1	22
TR2430|c0_g1_i2	318
TR2430|c0_g1_i4	114
TR2430|c0_g1_i5	236
TR2430|c0_g1_i6	16
TR2430|c0_g1_i7	142
TR24301|c0_g1_i1	34
TR24308|c0_g1_i1	78
TR2431|c1_g1_i1	852
TR2431|c1_g1_i2	386
TR24324|c0_g1_i1	44
TR24325|c0_g1_i3	132
TR24331|c0_g1_i1	18
TR24331|c0_g2_i1	26
TR24332|c0_g1_i1	44
TR24334|c0_g1_i1	272
TR24342|c2_g1_i1	50
TR2435|c0_g2_i1	906
TR2435|c0_g2_i2	220
TR24353|c0_g2_i1	1128
TR24354|c0_g1_i2	296
TR24357|c0_g1_i1	106
TR24362|c0_g1_i1	544
TR24367|c1_g1_i1	142
TR2437|c0_g1_i1	504
TR24370|c0_g1_i1	44
TR2438|c0_g1_i1	38
TR24381|c0_g1_i1	150
TR2439|c0_g1_i1	18
TR2439|c0_g1_i2	64
TR2439|c0_g1_i3	30
TR24390|c0_g1_i3	62
TR24396|c0_g1_i1	20
TR24397|c0_g1_i1	20
TR24397|c1_g1_i2	42
TR24399|c0_g2_i1	100
TR2440|c0_g1_i1	558
TR2440|c0_g1_i3	412
TR24400|c0_g1_i2	90
TR24400|c1_g1_i2	186
TR24401|c0_g2_i1	138
TR2441|c0_g1_i1	68
TR2441|c0_g1_i3	54
TR24410|c0_g1_i1	310
TR24412|c1_g1_i1	28
TR24423|c0_g1_i1	20
TR24424|c0_g1_i1	144
TR24427|c0_g1_i3	74
TR2443|c1_g3_i5	54
TR2443|c1_g3_i8	76
TR2443|c1_g4_i1	50
TR24434|c0_g1_i1	32
TR2444|c0_g1_i2	470
TR2445|c0_g1_i1	52
TR2445|c0_g1_i2	212
TR2445|c0_g1_i3	168
TR2446|c0_g2_i2	14
TR24491|c0_g1_i1	54
TR24494|c0_g2_i1	20
TR24496|c0_g1_i1	56
TR24499|c0_g1_i2	86
TR24499|c0_g1_i3	46
TR24507|c0_g1_i1	52
TR24509|c0_g1_i1	52
TR24514|c0_g1_i2	204
TR24516|c0_g1_i2	82
TR24519|c0_g1_i1	102
TR24521|c0_g1_i1	16
TR24521|c0_g1_i2	62
TR24522|c0_g1_i1	334
TR24523|c0_g1_i1	66
TR24523|c0_g1_i2	80
TR24525|c0_g1_i1	86
TR24532|c0_g1_i1	32
TR24537|c0_g1_i1	34
TR24537|c0_g1_i2	68
TR24538|c0_g1_i1	56
TR24538|c0_g1_i2	90
TR2454|c1_g1_i1	42
TR2454|c1_g1_i3	30
TR2454|c1_g1_i6	70
TR24541|c0_g3_i1	18
TR24545|c0_g1_i1	172
TR2455|c0_g1_i1	182
TR24551|c0_g1_i1	28
TR24551|c1_g1_i3	106
TR24552|c1_g1_i5	36
TR24552|c1_g2_i1	26
TR24555|c0_g1_i1	54
TR24559|c1_g1_i1	58
TR24563|c0_g1_i2	48
TR24566|c0_g1_i2	58
TR2458|c0_g1_i1	44
TR24580|c0_g1_i1	66
TR24582|c0_g1_i1	44
TR24587|c0_g1_i1	44
TR24588|c0_g1_i1	28
TR24589|c0_g1_i1	120
TR2459|c0_g1_i1	124
TR2459|c0_g1_i2	150
TR24593|c0_g1_i8	132
TR24601|c0_g2_i1	154
TR24609|c0_g1_i1	34
TR2462|c0_g1_i3	102
TR2462|c0_g1_i6	188
TR2462|c0_g1_i7	198
TR2462|c0_g3_i1	82
TR2462|c0_g3_i2	164
TR24620|c0_g1_i1	102
TR24620|c0_g1_i3	74
TR24627|c1_g1_i1	26
TR24627|c1_g1_i2	46
TR24627|c1_g1_i5	38
TR2463|c0_g1_i1	268
TR24631|c0_g1_i1	56
TR24638|c0_g1_i1	40
TR2464|c0_g1_i3	102
TR24647|c0_g1_i1	66
TR24648|c0_g1_i1	296
TR24649|c0_g1_i1	28
TR2465|c0_g1_i1	620
TR2465|c0_g1_i2	44
TR2465|c0_g1_i3	152
TR2465|c0_g1_i4	144
TR2465|c0_g1_i7	322
TR24651|c0_g1_i1	106
TR24662|c0_g1_i1	26
TR24668|c0_g1_i1	90
TR24671|c0_g3_i2	40
TR24674|c0_g1_i1	86
TR2468|c1_g3_i1	180
TR2468|c1_g3_i2	148
TR24691|c1_g1_i1	24
TR24694|c0_g2_i1	32
TR2470|c1_g1_i4	74
TR2470|c1_g1_i8	102
TR24701|c0_g1_i1	146
TR24701|c0_g2_i1	14
TR24701|c0_g2_i2	120
TR24708|c0_g2_i1	22
TR2471|c0_g1_i2	920
TR2471|c0_g1_i4	572
TR24710|c0_g1_i1	46
TR24712|c0_g1_i1	58
TR24716|c0_g1_i1	136
TR24716|c0_g1_i2	392
TR24716|c0_g1_i3	126
TR24719|c0_g1_i1	68
TR24719|c1_g1_i1	54
TR24719|c1_g3_i1	18
TR24722|c0_g1_i1	46
TR24723|c0_g1_i1	80
TR2473|c0_g1_i2	50
TR2473|c0_g1_i3	84
TR24732|c0_g1_i1	50
TR24734|c0_g1_i1	240
TR24734|c0_g2_i1	26
TR24737|c0_g1_i1	116
TR24743|c0_g1_i1	94
TR24743|c0_g2_i1	306
TR2475|c0_g2_i1	100
TR2475|c0_g3_i2	524
TR24755|c0_g1_i2	56
TR24759|c0_g1_i1	20
TR24769|c0_g1_i3	152
TR24769|c0_g1_i4	18
TR2477|c0_g2_i1	82
TR2477|c0_g2_i3	64
TR24786|c0_g1_i1	24
TR2479|c0_g1_i1	128
TR2479|c0_g1_i3	118
TR24790|c0_g2_i1	46
TR24792|c0_g1_i2	1394
TR24792|c0_g1_i3	58
TR24792|c0_g2_i1	116
TR24793|c0_g1_i1	78
TR24795|c0_g1_i2	100
TR24795|c0_g1_i3	534
TR24798|c0_g1_i3	506
TR24798|c0_g2_i1	256
TR24798|c0_g2_i3	522
TR24802|c0_g1_i3	32
TR24806|c0_g4_i2	12
TR24806|c0_g5_i2	66
TR24806|c0_g6_i1	52
TR24808|c0_g1_i1	64
TR24809|c0_g1_i1	112
TR24813|c0_g1_i3	44
TR24814|c1_g1_i4	136
TR24814|c1_g1_i5	360
TR24815|c0_g1_i1	108
TR24831|c0_g1_i1	68
TR24832|c0_g1_i1	76
TR24837|c0_g1_i1	72
TR24848|c0_g1_i3	164
TR2485|c3_g1_i2	842
TR24852|c0_g1_i2	90
TR24857|c0_g1_i1	24
TR2486|c0_g1_i1	368
TR2486|c0_g1_i2	266
TR2486|c0_g2_i3	836
TR2486|c0_g2_i4	364
TR2486|c0_g3_i1	28
TR24870|c0_g2_i1	58
TR24871|c0_g1_i1	204
TR24887|c0_g1_i1	66
TR24889|c0_g1_i2	70
TR24889|c0_g1_i3	38
TR24901|c0_g1_i1	1064
TR24902|c0_g1_i1	162
TR24905|c0_g1_i1	158
TR2491|c0_g1_i5	76
TR24911|c0_g1_i4	68
TR2492|c0_g2_i2	84
TR24921|c0_g1_i1	28
TR24924|c1_g2_i1	36
TR24926|c0_g1_i1	152
TR24947|c0_g1_i1	144
TR24949|c0_g1_i1	84
TR24949|c0_g1_i2	18
TR24951|c0_g1_i2	20
TR24956|c0_g1_i1	108
TR24961|c0_g1_i1	80
TR24962|c0_g1_i1	42
TR24962|c0_g2_i1	100
TR24964|c0_g1_i2	90
TR24966|c0_g1_i1	24
TR24968|c1_g1_i1	406
TR24968|c1_g2_i2	282
TR24969|c0_g1_i1	82
TR2497|c0_g3_i1	176
TR2497|c0_g3_i3	486
TR2497|c0_g3_i5	1390
TR2497|c0_g3_i6	898
TR2497|c0_g4_i1	2266
TR24979|c0_g1_i1	310
TR2498|c0_g1_i1	316
TR2498|c0_g2_i1	50
TR2498|c0_g2_i2	62
TR24980|c0_g1_i1	84
TR24981|c0_g1_i2	488
TR24982|c0_g1_i1	50
TR24987|c0_g1_i1	96
TR24988|c0_g1_i5	136
TR24988|c0_g1_i6	82
TR24989|c0_g1_i1	184
TR2499|c0_g1_i3	488
TR24994|c0_g1_i1	40
TR2500|c0_g1_i4	28
TR25002|c0_g2_i3	72
TR25003|c0_g1_i1	20
TR25017|c0_g1_i1	258
TR25017|c0_g1_i3	340
TR25018|c0_g1_i1	30
TR2502|c0_g1_i1	938
TR25020|c0_g1_i1	42
TR25021|c0_g1_i1	88
TR25024|c0_g1_i3	232
TR25024|c0_g1_i4	132
TR25026|c0_g2_i1	98
TR25031|c0_g1_i1	94
TR25033|c0_g1_i2	62
TR25034|c0_g1_i1	72
TR25034|c0_g1_i2	110
TR25039|c0_g1_i3	564
TR2504|c0_g1_i1	78
TR25043|c0_g1_i1	68
TR25043|c1_g1_i1	78
TR25050|c0_g1_i1	48
TR25054|c0_g2_i1	346
TR25056|c0_g1_i1	150
TR2506|c0_g2_i1	330
TR25060|c0_g1_i1	160
TR25061|c0_g1_i1	16
TR25065|c0_g2_i1	94
TR25068|c0_g1_i1	38
TR25068|c1_g1_i2	56
TR2507|c0_g4_i1	28
TR25083|c0_g1_i3	342
TR25088|c0_g1_i1	24
TR25092|c0_g1_i1	234
TR25092|c0_g2_i1	18
TR25093|c1_g3_i1	92
TR25098|c0_g1_i1	28
TR2510|c0_g2_i4	38
TR2510|c0_g3_i1	32
TR25102|c1_g1_i1	92
TR25109|c0_g1_i1	16
TR25109|c0_g3_i1	108
TR25110|c1_g1_i1	32
TR25115|c0_g1_i2	130
TR25115|c0_g1_i4	30
TR2512|c1_g1_i1	144
TR25121|c0_g1_i1	564
TR25123|c0_g1_i1	54
TR25128|c0_g2_i3	20
TR25128|c0_g2_i4	72
TR2513|c1_g1_i1	208
TR2513|c1_g2_i1	18
TR25134|c0_g1_i1	164
TR2514|c1_g10_i1	38
TR2514|c1_g10_i4	218
TR2514|c1_g10_i5	134
TR2514|c1_g10_i6	92
TR2514|c1_g4_i1	98
TR2514|c1_g4_i2	32
TR2514|c1_g4_i3	92
TR2514|c1_g5_i1	180
TR2514|c1_g9_i1	266
TR2514|c1_g9_i2	300
TR2514|c1_g9_i3	466
TR25142|c0_g1_i1	106
TR25142|c0_g1_i4	98
TR25153|c0_g1_i1	46
TR25156|c0_g1_i1	996
TR2516|c0_g1_i3	180
TR25160|c0_g1_i4	156
TR25163|c0_g1_i1	252
TR2519|c0_g1_i1	126
TR25191|c0_g1_i1	26
TR25193|c0_g1_i1	26
TR25193|c0_g1_i3	42
TR25197|c0_g1_i1	120
TR25198|c0_g1_i1	144
TR25200|c0_g2_i1	72
TR25205|c0_g1_i1	236
TR25208|c0_g1_i2	132
TR2521|c0_g10_i2	48
TR2521|c0_g2_i1	32
TR2521|c0_g3_i2	312
TR2521|c0_g3_i3	406
TR2521|c0_g3_i5	64
TR2521|c0_g4_i2	72
TR25211|c0_g1_i1	58
TR25211|c0_g1_i2	236
TR25213|c0_g1_i1	74
TR25214|c0_g1_i4	22
TR25216|c0_g1_i1	78
TR25216|c0_g2_i2	98
TR25218|c0_g1_i2	170
TR25222|c0_g1_i1	50
TR2523|c0_g1_i2	810
TR2523|c0_g1_i8	568
TR2523|c0_g3_i2	40
TR25232|c0_g1_i1	160
TR25236|c0_g1_i2	100
TR25240|c0_g1_i1	42
TR25247|c0_g1_i2	38
TR25249|c0_g1_i1	194
TR25249|c0_g6_i1	780
TR2525|c0_g1_i1	22
TR2526|c0_g2_i3	88
TR25263|c0_g1_i4	1198
TR25268|c0_g1_i1	138
TR25269|c0_g1_i1	34
TR25270|c0_g1_i1	46
TR25272|c0_g1_i1	142
TR25272|c0_g3_i1	18
TR25279|c0_g1_i1	184
TR2528|c3_g1_i3	72
TR25281|c0_g1_i1	110
TR25285|c0_g1_i1	54
TR25291|c0_g1_i1	100
TR25292|c0_g1_i4	28
TR25294|c0_g1_i1	390
TR25295|c0_g2_i1	48
TR2530|c0_g1_i1	36
TR2530|c1_g4_i1	122
TR2530|c1_g4_i2	104
TR2530|c1_g4_i3	198
TR25304|c0_g1_i1	16
TR25304|c1_g1_i1	98
TR25306|c1_g1_i1	1882
TR25306|c1_g1_i2	2098
TR25310|c0_g1_i1	28
TR25311|c0_g1_i2	128
TR25313|c0_g1_i1	872
TR2532|c0_g4_i1	26
TR2532|c0_g4_i2	80
TR25320|c0_g1_i1	90
TR25321|c0_g1_i2	200
TR25322|c0_g1_i1	284
TR25323|c0_g1_i1	92
TR25324|c0_g1_i1	56
TR25328|c0_g1_i2	142
TR25329|c0_g1_i2	26
TR25329|c0_g1_i3	20
TR25334|c0_g1_i3	110
TR25338|c0_g1_i1	58
TR2534|c0_g3_i1	94
TR2534|c0_g3_i2	34
TR2534|c0_g4_i1	62
TR2534|c0_g4_i3	146
TR25356|c0_g2_i3	90
TR25357|c0_g1_i3	44
TR25358|c0_g1_i5	28
TR2536|c0_g1_i2	270
TR25364|c0_g1_i1	60
TR25369|c0_g1_i1	54
TR2537|c1_g1_i1	72
TR25373|c1_g2_i1	194
TR25373|c1_g2_i3	98
TR25374|c0_g1_i2	132
TR25377|c0_g1_i1	36
TR25379|c0_g2_i1	14
TR25381|c0_g1_i2	92
TR25383|c0_g1_i3	26
TR25383|c0_g1_i4	54
TR25384|c0_g1_i2	218
TR2540|c1_g3_i1	150
TR2540|c2_g1_i1	210
TR2541|c0_g2_i2	312
TR2542|c1_g3_i2	1352
TR2543|c1_g1_i11	200
TR2543|c1_g1_i12	208
TR2543|c1_g1_i14	88
TR2543|c1_g1_i3	36
TR2543|c1_g1_i4	114
TR2544|c0_g1_i10	86
TR2544|c0_g1_i2	102
TR2544|c0_g1_i6	136
TR2544|c0_g5_i1	10
TR2545|c0_g1_i1	62
TR2545|c0_g2_i1	84
TR2545|c0_g2_i2	478
TR2545|c0_g2_i4	676
TR2545|c1_g1_i1	150
TR2545|c1_g2_i1	556
TR2545|c1_g4_i1	372
TR2545|c1_g4_i2	58
TR2546|c0_g2_i1	38
TR2546|c0_g3_i1	132
TR2546|c0_g3_i2	50
TR2547|c0_g1_i1	296
TR2548|c0_g2_i1	30
TR2548|c0_g3_i2	80
TR2548|c0_g4_i1	68
TR25484|c0_g1_i2	56
TR25489|c0_g1_i1	106
TR2549|c0_g1_i1	686
TR2549|c0_g2_i1	362
TR25502|c0_g3_i1	200
TR25502|c0_g3_i2	620
TR25506|c2_g1_i1	112
TR25506|c2_g3_i1	962
TR2551|c0_g1_i4	514
TR25510|c1_g1_i2	104
TR25512|c0_g1_i2	116
TR25514|c0_g1_i1	546
TR25514|c0_g1_i2	190
TR25514|c0_g2_i1	80
TR25517|c0_g1_i3	202
TR25519|c0_g2_i2	20
TR25520|c0_g1_i2	20
TR25521|c0_g1_i1	1612
TR25522|c0_g1_i1	20
TR25525|c1_g2_i1	422
TR25531|c0_g1_i2	48
TR25533|c0_g1_i1	118
TR25536|c0_g1_i1	188
TR25537|c0_g1_i1	40
TR2554|c0_g1_i3	44
TR25544|c1_g1_i1	66
TR25545|c0_g1_i2	54
TR25551|c0_g1_i1	100
TR25553|c0_g1_i1	24
TR25554|c0_g1_i1	412
TR25557|c0_g1_i1	46
TR25557|c0_g1_i2	46
TR25559|c0_g1_i1	78
TR2556|c1_g1_i1	10
TR2556|c1_g2_i1	164
TR25564|c0_g1_i1	40
TR25568|c0_g1_i1	140
TR25569|c0_g3_i1	362
TR25571|c0_g1_i1	52
TR25573|c1_g1_i2	44
TR25573|c1_g1_i4	124
TR25575|c0_g1_i1	1356
TR25577|c0_g1_i1	30
TR25578|c0_g2_i1	2088
TR25586|c0_g1_i1	40
TR25586|c1_g1_i1	26
TR25589|c0_g1_i1	1812
TR2559|c1_g1_i2	784
TR2559|c2_g1_i1	118
TR2559|c2_g2_i1	38
TR2559|c2_g6_i1	154
TR25597|c0_g1_i2	46
TR25598|c0_g2_i1	120
TR2560|c1_g1_i1	66
TR25604|c0_g1_i1	474
TR25605|c0_g1_i1	192
TR25605|c0_g1_i2	82
TR2561|c0_g1_i2	176
TR2561|c0_g1_i3	100
TR25613|c0_g1_i1	80
TR25614|c0_g1_i1	90
TR25616|c0_g1_i2	96
TR25617|c0_g1_i1	110
TR25617|c0_g2_i1	26
TR25629|c0_g2_i1	112
TR25629|c0_g2_i2	16
TR2563|c0_g1_i1	162
TR2563|c0_g2_i1	52
TR2563|c0_g4_i1	62
TR2563|c0_g5_i1	248
TR2563|c0_g6_i1	64
TR2563|c0_g7_i2	110
TR25633|c0_g1_i1	306
TR25636|c0_g1_i10	54
TR25636|c0_g1_i4	32
TR2564|c0_g1_i1	460
TR2564|c0_g1_i4	50
TR2564|c0_g1_i5	682
TR25647|c1_g1_i1	84
TR25647|c1_g1_i2	24
TR2565|c0_g1_i1	382
TR2565|c0_g2_i1	22
TR25658|c0_g1_i1	78
TR25658|c0_g1_i2	100
TR25658|c0_g2_i1	36
TR25659|c0_g1_i1	196
TR25659|c0_g5_i1	72
TR2566|c0_g1_i3	82
TR25662|c0_g1_i1	26
TR25670|c0_g1_i1	1022
TR25672|c1_g3_i1	16
TR25676|c0_g2_i1	52
TR2568|c0_g1_i1	592
TR25681|c0_g1_i2	184
TR25692|c0_g1_i1	132
TR25693|c0_g1_i1	52
TR25693|c0_g2_i1	118
TR25693|c0_g2_i2	30
TR25696|c0_g1_i2	48
TR2570|c0_g1_i14	68
TR25701|c4_g3_i1	28
TR25702|c0_g1_i1	62
TR25704|c0_g1_i1	944
TR2571|c0_g1_i3	168
TR2571|c0_g1_i5	788
TR25715|c0_g1_i1	116
TR25715|c0_g1_i2	124
TR2572|c1_g2_i4	26
TR2572|c1_g2_i5	50
TR2572|c1_g3_i2	156
TR25722|c1_g1_i3	30
TR25723|c0_g1_i1	32
TR25726|c0_g1_i1	74
TR25730|c0_g1_i2	84
TR25732|c0_g1_i1	56
TR25736|c0_g1_i1	52
TR25736|c1_g1_i1	140
TR25741|c0_g1_i3	18
TR25746|c0_g1_i1	698
TR25746|c0_g1_i3	20
TR25747|c0_g3_i2	84
TR2575|c0_g3_i1	82
TR2575|c0_g3_i2	484
TR2575|c0_g6_i1	120
TR25753|c0_g2_i1	64
TR25756|c0_g1_i1	32
TR25762|c0_g1_i2	38
TR25766|c0_g1_i1	128
TR2577|c0_g2_i1	1004
TR2577|c0_g2_i3	162
TR25779|c0_g1_i1	60
TR25779|c0_g1_i2	34
TR25782|c0_g1_i2	62
TR25782|c0_g1_i3	16
TR25787|c1_g1_i1	32
TR25789|c0_g1_i1	128
TR25790|c0_g1_i1	72
TR25791|c0_g1_i3	22
[truncated: 71,266 more rows]

## Sheet: OKP2_vs_AMPHID2_Differential
Transcript ID	baseMeanA( AMPHID2 )	baseMeanB( OK_P2 )	log2FoldChange( OK_P2 Vs. AMPHID2 )	pval	padj	Significant	Hit Description	Hit Organism	Family	Gene Ontology (Biological Process)	Gene Ontology (Molecular Function)	Gene Ontology (Cellular Component)	Pathway
TR33020|c0_g6_i4	396	66	-2.58496	0.000179818	0.0488361	Yes	NA	NA	NA	NA	NA	NA	NA
TR30547|c0_g1_i2	1530	292	-2.38949	0.000175461	0.0478754	Yes	PREDICTED: 14 kDa proline-rich protein DC2.15-like	Sesamum indicum	NA	NA	NA	NA	NA
TR42812|c3_g4_i3	1002	192	-2.3837	0.000173731	0.0478506	Yes	PREDICTED: fructose-1,6-bisphosphatase, cytosolic	Sesamum indicum	NA	NA	NA	NA	NA
TR30871|c0_g1_i1	1240	238	-2.38131	0.000171888	0.0475674	Yes	heat shock protein 70	Genlisea aurea	NA	NA	ATP binding[GO:0005524]	NA	NA
TR34503|c1_g2_i6	146	18	-3.0199	0.000167981	0.0467075	Yes	PREDICTED: fructose-bisphosphate aldolase 1, chloroplastic	Sesamum indicum	NA	NA	NA	NA	NA
TR37039|c0_g4_i1	158	20	-2.98185	0.000167509	0.0467991	Yes	PREDICTED: serine/arginine-rich splicing factor RS40 isoform X2	Sesamum indicum	NA	NA	NA	NA	NA
TR33100|c0_g1_i6	620	112	-2.46877	0.000158145	0.0450451	Yes	PREDICTED: aluminum-activated malate transporter 4-like	Sesamum indicum	NA	NA	NA	NA	NA
TR21902|c0_g1_i1	196	26	-2.91427	0.000150229	0.0434258	Yes	NA	NA	NA	NA	NA	NA	NA
TR3126|c0_g1_i2	1598	296	-2.4326	0.00014053	0.0410284	Yes	PREDICTED: CBS domain-containing protein CBSX1, chloroplastic	Sesamum indicum	NA	NA	NA	NA	NA
TR3151|c0_g2_i1	9730	1034	-3.2342	0.000136641	0.040296	Yes	PREDICTED: acid phosphatase 1-like	Solanum lycopersicum	NA	NA	NA	NA	NA
TR42338|c0_g2_i8	622	110	-2.49941	0.000133659	0.040023	Yes	putative rubisco subunit binding-protein alpha subunit	Trifolium pratense	NA	protein refolding[GO:0042026]	ATP binding[GO:0005524]	cytoplasm[GO:0005737]	NA
TR31294|c0_g2_i4	176	22	-3	0.000128081	0.038952	Yes	NA	NA	NA	NA	NA	NA	NA
TR31330|c3_g4_i3	960	176	-2.44746	0.0001231	0.0378312	Yes	PREDICTED: oxygen-evolving enhancer protein 2-1, chloroplastic-like	Sesamum indicum	NA	NA	NA	NA	NA
TR42641|c0_g11_i1	354	54	-2.71272	0.000120424	0.0372046	Yes	NA	NA	NA	NA	NA	NA	NA
TR35643|c1_g4_i4	128	14	-3.19265	0.00011282	0.0354176	Yes	PREDICTED: protein Iojap, chloroplastic	Sesamum indicum	NA	NA	NA	NA	NA
TR43590|c1_g7_i1	428	68	-2.654	0.000110005	0.0351	Yes	NA	NA	NA	NA	NA	NA	NA
TR3678|c0_g1_i2	348	52	-2.7425	0.000107952	0.0346342	Yes	unnamed protein product	Coffea canephora	NA	metabolic process[GO:0008152]	transferase activity, transferring hexosyl groups[GO:0016758]	NA	NA
TR33321|c4_g1_i4	640	110	-2.54057	0.000103261	0.0333122	Yes	PREDICTED: flavanone 3-dioxygenase-like	Sesamum indicum	NA	NA	NA	NA	NA
TR33439|c0_g13_i5	656	112	-2.5502	9.5054e-05	0.0310223	Yes	PREDICTED: chlorophyll a-b binding protein of LHCII type 1-like	Glycine max	NA	response to light stimulus[GO:0009416] ; protein-chromophore linkage[GO:0018298] ; photosynthesis, light harvesting in photosystem I[GO:0009768]	chlorophyll binding[GO:0016168] ; pigment binding[GO:0031409]	integral component of membrane[GO:0016021] ; chloroplast envelope[GO:0009941] ; chloroplast thylakoid membrane[GO:0009535] ; photosystem II[GO:0009523] ; plastoglobule[GO:0010287]	NA
TR7467|c0_g1_i2	310	44	-2.81669	9.48175e-05	0.0310981	Yes	PREDICTED: WEB family protein At5g55860-like	Sesamum indicum	NA	NA	NA	NA	NA
TR40516|c0_g1_i4	822	144	-2.51307	9.32946e-05	0.030779	Yes	PREDICTED: stachyose synthase	Sesamum indicum	NA	NA	NA	NA	NA
TR44455|c2_g5_i1	322	46	-2.80735	9.22234e-05	0.0305889	Yes	NA	NA	NA	NA	NA	NA	NA
TR36784|c0_g1_i5	628	106	-2.5667	9.17398e-05	0.0305969	Yes	PREDICTED: uncharacterized protein LOC105172991 isoform X2	Sesamum indicum	NA	NA	NA	NA	NA
TR36187|c0_g4_i3	478	76	-2.65294	8.92951e-05	0.0299673	Yes	PREDICTED: 20 kDa chaperonin, chloroplastic-like	Sesamum indicum	NA	NA	NA	NA	NA
TR28750|c1_g1_i4	1818	314	-2.53352	8.66479e-05	0.0292293	Yes	Oxygen-evolving enhancer protein 3-1	Populus trichocarpa	NA	photosynthesis[GO:0015979]	calcium ion binding[GO:0005509]	photosystem II oxygen evolving complex[GO:0009654] ; extrinsic component of membrane[GO:0019898]	NA
TR7601|c0_g1_i2	1528	268	-2.51134	8.64709e-05	0.0293652	Yes	flavone 8-hydroxylase	Ocimum basilicum	Lamiaceae	oxidation-reduction process[GO:0055114]	metal ion binding[GO:0046872] ; 2 iron, 2 sulfur cluster binding[GO:0051537] ; chlorophyllide a oxygenase [overall] activity[GO:0010277]	NA	map00860:Porphyrin and chlorophyll metabolism(oxygenase[ec:1.14.13.122])
TR32797|c1_g1_i1	246	32	-2.94251	8.46605e-05	0.0289223	Yes	PREDICTED: probable S-adenosylmethionine-dependent methyltransferase At5g37990	Sesamum indicum	NA	NA	NA	NA	NA
TR28256|c0_g1_i1	2242	374	-2.58368	8.23306e-05	0.0282681	Yes	PREDICTED: photosystem II reaction center W protein, chloroplastic-like	Nicotiana sylvestris	NA	NA	NA	NA	NA
TR36645|c2_g1_i1	120	12	-3.32193	7.90254e-05	0.0276221	Yes	PREDICTED: glucan endo-1,3-beta-glucosidase-like	Sesamum indicum	NA	NA	NA	NA	NA
TR33945|c0_g4_i3	188	22	-3.09516	7.64816e-05	0.0270722	Yes	hypothetical protein MIMGU_mgv1a012400mg	Mimulus guttatus	NA	NA	NA	integral component of membrane[GO:0016021]	NA
TR2350|c0_g2_i3	150	16	-3.22882	7.07728e-05	0.0256775	Yes	NA	NA	NA	NA	NA	NA	NA
TR32797|c2_g1_i4	354	50	-2.82375	7.04016e-05	0.025692	Yes	PREDICTED: probable S-adenosylmethionine-dependent methyltransferase At5g37990	Sesamum indicum	NA	NA	NA	NA	NA
TR35255|c2_g2_i5	240	30	-3	6.90952e-05	0.0253762	Yes	hypothetical protein CARUB_v10016258mg	Capsella rubella	NA	photosynthesis, light harvesting[GO:0009765] ; protein-chromophore linkage[GO:0018298]	metal ion binding[GO:0046872] ; chlorophyll binding[GO:0016168]	photosystem II[GO:0009523] ; integral component of membrane[GO:0016021] ; chloroplast[GO:0009507] ; photosystem I[GO:0009522]	NA
TR8118|c1_g5_i1	264	34	-2.95693	6.83697e-05	0.0252781	Yes	NA	NA	NA	NA	NA	NA	NA
TR27424|c1_g1_i5	1132	194	-2.54475	6.681e-05	0.0248441	Yes	NA	NA	NA	NA	NA	NA	NA
TR40948|c1_g1_i2	178	20	-3.15381	6.67976e-05	0.0250033	Yes	hypothetical protein GLYMA_02G165000	Glycine max	NA	glycolytic process[GO:0006096]	potassium ion binding[GO:0030955] ; pyruvate kinase activity[GO:0004743] ; magnesium ion binding[GO:0000287] ; kinase activity[GO:0016301]	NA	map01130:Biosynthesis of antibiotics(kinase[ec:2.7.1.40]) ; map00620:Pyruvate metabolism(kinase[ec:2.7.1.40]) ; map00010:Glycolysis / Gluconeogenesis(kinase[ec:2.7.1.40]) ; map00230:Purine metabolism(kinase[ec:2.7.1.40])
TR33439|c0_g2_i1	1380	236	-2.54781	6.67129e-05	0.025127	Yes	hypothetical protein PHAVU_004G093100g	Phaseolus vulgaris	NA	photosynthesis, light harvesting[GO:0009765] ; protein-chromophore linkage[GO:0018298]	chlorophyll binding[GO:0016168]	photosystem II[GO:0009523] ; integral component of membrane[GO:0016021] ; chloroplast[GO:0009507]	NA
TR42641|c0_g2_i1	886	150	-2.56234	6.66984e-05	0.0252901	Yes	NA	NA	NA	NA	NA	NA	NA
TR36108|c0_g1_i10	138	14	-3.30117	6.44852e-05	0.0246158	Yes	hypothetical protein MIMGU_mgv1a013916mg	Mimulus guttatus	NA	translation[GO:0006412]	structural constituent of ribosome[GO:0003735] ; RNA binding[GO:0003723]	ribosome[GO:0005840]	NA
TR31690|c0_g1_i5	324	44	-2.88042	6.43198e-05	0.0247009	Yes	NA	NA	NA	NA	NA	NA	NA
TR2335|c0_g2_i1	152	16	-3.24793	6.3809e-05	0.0246712	Yes	NA	NA	NA	NA	NA	NA	NA
TR33116|c0_g2_i3	538	84	-2.67914	6.28587e-05	0.0246496	Yes	PREDICTED: peptide methionine sulfoxide reductase A1-like	Sesamum indicum	NA	NA	NA	NA	NA
TR43848|c1_g1_i6	510	78	-2.70895	5.89974e-05	0.0235964	Yes	hypothetical protein CISIN_1g0038272mg, partial	Citrus sinensis	NA	protein folding[GO:0006457] ; response to stress[GO:0006950]	ATP binding[GO:0005524] ; unfolded protein binding[GO:0051082]	NA	NA
TR42285|c0_g8_i4	354	48	-2.88264	5.28309e-05	0.0215598	Yes	hypothetical protein POPTR_0011s05250g	Populus trichocarpa	NA	isoleucine biosynthetic process[GO:0009097] ; valine biosynthetic process[GO:0009099] ; oxidation-reduction process[GO:0055114]	ketol-acid reductoisomerase activity[GO:0004455] ; metal ion binding[GO:0046872]	NA	map00290:Valine, leucine and isoleucine biosynthesis(reductoisomerase (NADP+)[ec:1.1.1.86]) ; map01130:Biosynthesis of antibiotics(reductoisomerase (NADP+)[ec:1.1.1.86]) ; map00770:Pantothenate and CoA biosynthesis(reductoisomerase (NADP+)[ec:1.1.1.86])
TR42502|c1_g3_i8	272	34	-3	5.26571e-05	0.0216705	Yes	NA	NA	NA	NA	NA	NA	NA
TR30451|c0_g2_i3	210	24	-3.12928	5.25678e-05	0.0217827	Yes	PREDICTED: 14 kDa proline-rich protein DC2.15-like	Erythranthe guttatus	NA	NA	NA	NA	NA
TR42436|c0_g7_i1	248	30	-3.04731	5.20752e-05	0.0217298	Yes	PREDICTED: calreticulin-like	Eucalyptus grandis	NA	NA	NA	NA	NA
TR42502|c1_g3_i7	170	18	-3.23947	5.1653e-05	0.0217181	Yes	hypothetical protein MIMGU_mgv1a000979mg	Mimulus guttatus	NA	oxylipin biosynthetic process[GO:0031408] ; oxidation-reduction process[GO:0055114]	metal ion binding[GO:0046872] ; oxidoreductase activity, acting on single donors with incorporation of molecular oxygen, incorporation of two atoms of oxygen[GO:0016702]	NA	NA
TR37411|c0_g4_i1	454	66	-2.78215	5.07411e-05	0.0214523	Yes	hydroxypyruvate reductase	Solenostemon scutellarioides	NA	oxidation-reduction process[GO:0055114]	NAD binding[GO:0051287] ; glycerate dehydrogenase activity[GO:0008465]	NA	map00260:Glycine, serine and threonine metabolism(dehydrogenase[ec:1.1.1.29]) ; map00630:Glyoxylate and dicarboxylate metabolism(dehydrogenase[ec:1.1.1.29]) ; map01130:Biosynthesis of antibiotics(dehydrogenase[ec:1.1.1.29]) ; map00680:Methane metabolism(dehydrogenase[ec:1.1.1.29])
TR37300|c2_g4_i3	310	40	-2.9542	4.94416e-05	0.0210549	Yes	hypothetical protein MIMGU_mgv1a008741mg	Mimulus guttatus	NA	metabolic process[GO:0008152]	carbon-sulfur lyase activity[GO:0016846]	NA	NA
TR38704|c1_g2_i3	782	126	-2.63374	4.90701e-05	0.0210809	Yes	hypothetical protein MIMGU_mgv1a006920mg	Mimulus guttatus	NA	protein folding[GO:0006457]	unfolded protein binding[GO:0051082] ; calcium ion binding[GO:0005509]	endoplasmic reticulum[GO:0005783]	NA
TR2361|c2_g1_i1	2316	360	-2.68557	4.74604e-05	0.020545	Yes	terpene synthase 3	Origanum vulgare	Lamiaceae	metabolic process[GO:0008152]	magnesium ion binding[GO:0000287] ; terpene synthase activity[GO:0010333]	NA	NA
TR31605|c0_g1_i2	186	20	-3.21723	4.70507e-05	0.020524	Yes	PREDICTED: protein FAM210B-like	Solanum tuberosum	NA	positive regulation of transcription, DNA-templated[GO:0045893] ; leaf morphogenesis[GO:0009965] ; phosphatidylinositol biosynthetic process[GO:0006661] ; cell differentiation[GO:0030154]	NA	chloroplast thylakoid membrane[GO:0009535]	NA
TR33100|c0_g1_i7	624	96	-2.70044	4.43622e-05	0.0196406	Yes	PREDICTED: aluminum-activated malate transporter 4-like	Sesamum indicum	NA	NA	NA	NA	NA
TR34419|c0_g1_i4	412	56	-2.87915	3.82305e-05	0.017291	Yes	PREDICTED: BI1-like protein	Sesamum indicum	NA	NA	NA	NA	NA
TR39740|c2_g5_i4	480	68	-2.81943	3.71121e-05	0.0170575	Yes	PREDICTED: delta(8)-fatty-acid desaturase-like	Sesamum indicum	NA	NA	NA	NA	NA
TR42641|c0_g12_i2	1212	194	-2.64326	3.70259e-05	0.0171466	Yes	pyrophosphatase, partial	Solanum pimpinellifolium	NA	metabolic process[GO:0008152] ; proton transport[GO:0015992] ; transmembrane transport[GO:0055085]	inorganic diphosphatase activity[GO:0004427] ; hydrogen-translocating pyrophosphatase activity[GO:0009678]	integral component of membrane[GO:0016021]	map00190:Oxidative phosphorylation(diphosphatase[ec:3.6.1.1])
TR2701|c1_g1_i1	296	36	-3.03953	3.63913e-05	0.0170035	Yes	NA	NA	NA	NA	NA	NA	NA
TR43188|c0_g4_i2	718	110	-2.70648	3.55502e-05	0.0169002	Yes	PREDICTED: phosphoglucan, water dikinase, chloroplastic	Sesamum indicum	NA	NA	NA	NA	NA
TR34005|c0_g3_i4	134	12	-3.48113	3.51686e-05	0.0168472	Yes	NA	NA	NA	NA	NA	NA	NA
TR34005|c0_g3_i2	428	58	-2.88349	3.42643e-05	0.0165522	Yes	NA	NA	NA	NA	NA	NA	NA
TR39740|c2_g5_i3	336	42	-3	3.34297e-05	0.0165276	Yes	NA	NA	NA	NA	NA	NA	NA
TR40656|c0_g4_i1	248	28	-3.14684	3.32905e-05	0.016619	Yes	PREDICTED: uncharacterized protein LOC101258883	Solanum lycopersicum	NA	NA	NA	integral component of membrane[GO:0016021]	NA
TR35025|c0_g4_i2	876	136	-2.68732	3.25316e-05	0.0165018	Yes	hypothetical protein MIMGU_mgv1a010790mg	Mimulus guttatus	NA	NA	organic cyclic compound binding[GO:0097159] ; heterocyclic compound binding[GO:1901363]	NA	NA
TR37175|c0_g5_i1	198	20	-3.30743	2.81055e-05	0.0146499	Yes	PREDICTED: fructose-1,6-bisphosphatase, chloroplastic	Sesamum indicum	NA	NA	NA	NA	NA
TR7878|c0_g12_i1	498	68	-2.87254	2.58724e-05	0.0136246	Yes	PREDICTED: protein EARLY RESPONSIVE TO DEHYDRATION 15	Sesamum indicum	NA	NA	NA	NA	NA
TR34392|c0_g2_i2	188	18	-3.38466	2.29191e-05	0.0124968	Yes	hypothetical protein MIMGU_mgv1a015732mg	Mimulus guttatus	NA	cell redox homeostasis[GO:0045454] ; oxidation-reduction process[GO:0055114]	flavin adenine dinucleotide binding[GO:0050660] ; oxidoreductase activity[GO:0016491]	cell[GO:0005623]	NA
TR36995|c0_g1_i1	730	106	-2.78383	2.23363e-05	0.0122841	Yes	NA	NA	NA	NA	NA	NA	NA
TR35332|c0_g8_i1	204	20	-3.3505	2.18219e-05	0.0121231	Yes	hypothetical protein MIMGU_mgv1a014477mg	Mimulus guttatus	NA	NA	NA	integral component of membrane[GO:0016021]	NA
TR28327|c0_g1_i2	472	62	-2.92845	2.16254e-05	0.0121274	Yes	hypothetical protein MIMGU_mgv1a025794mg	Mimulus guttatus	NA	NA	NA	NA	NA
TR30741|c0_g8_i3	2030	284	-2.83752	1.58061e-05	0.00931897	Yes	PREDICTED: chlorophyll a-b binding protein 5, chloroplastic	Sesamum indicum	NA	NA	NA	NA	NA
TR33100|c0_g1_i3	1262	178	-2.82576	1.21735e-05	0.00774315	Yes	PREDICTED: aluminum-activated malate transporter 4-like	Sesamum indicum	NA	NA	NA	NA	NA
TR32077|c0_g6_i7	362	40	-3.17792	1.15932e-05	0.00744325	Yes	PREDICTED: histone H3.2-like isoform X2	Solanum tuberosum	NA	NA	NA	NA	NA
TR33100|c0_g1_i5	1300	182	-2.8365	1.14144e-05	0.00739619	Yes	PREDICTED: aluminum-activated malate transporter 4-like	Sesamum indicum	NA	NA	NA	NA	NA
TR43014|c4_g4_i2	402	46	-3.12749	1.1381e-05	0.0074793	Yes	SAHH1, partial	Matthiola fruticulosa subsp. valesiaca	NA	one-carbon metabolic process[GO:0006730]	adenosylhomocysteinase activity[GO:0004013]	NA	map00270:Cysteine and methionine metabolism(S-adenosylhomocysteine synthase[ec:3.3.1.1])
TR2361|c2_g1_i2	2420	316	-2.93701	1.12166e-05	0.007517	Yes	terpene synthase 3	Origanum vulgare	Lamiaceae	metabolic process[GO:0008152]	magnesium ion binding[GO:0000287] ; terpene synthase activity[GO:0010333]	NA	NA
TR31684|c0_g4_i1	338	36	-3.23095	1.06137e-05	0.0072817	Yes	hypothetical protein MIMGU_mgv1a014682mg	Mimulus guttatus	NA	NA	DNA binding[GO:0003677]	nucleus[GO:0005634]	NA
TR35882|c0_g2_i1	282	28	-3.3322	1.02923e-05	0.00715985	Yes	PREDICTED: 30S ribosomal protein 2, chloroplastic	Sesamum indicum	NA	NA	NA	NA	NA
TR31386|c0_g1_i3	888	120	-2.88753	9.75706e-06	0.00686622	Yes	PREDICTED: psbQ-like protein 1, chloroplastic	Sesamum indicum	NA	NA	NA	NA	NA
TR27424|c1_g1_i6	1270	174	-2.86767	9.38598e-06	0.00668648	Yes	PREDICTED: transketolase, chloroplastic	Sesamum indicum	NA	NA	NA	NA	NA
TR35824|c1_g1_i1	160	12	-3.73697	8.38998e-06	0.00604815	Yes	Histone H2B.3	Morus notabilis	NA	NA	protein heterodimerization activity[GO:0046982] ; DNA binding[GO:0003677]	nucleosome[GO:0000786] ; nucleus[GO:0005634]	NA
TR42502|c1_g5_i1	732	94	-2.96111	7.89079e-06	0.00614273	Yes	PREDICTED: linoleate 13S-lipoxygenase 2-1, chloroplastic-like	Sesamum indicum	NA	NA	NA	NA	NA
TR34225|c0_g1_i3	394	42	-3.22973	7.09747e-06	0.00560238	Yes	PREDICTED: uncharacterized protein LOC105177106	Sesamum indicum	NA	NA	NA	NA	NA
TR30137|c0_g1_i10	248	22	-3.49476	6.92871e-06	0.00569929	Yes	PREDICTED: photosystem I reaction center subunit psaK, chloroplastic	Sesamum indicum	NA	NA	NA	NA	NA
TR34481|c1_g2_i3	280	26	-3.42884	6.6657e-06	0.00556383	Yes	PREDICTED: uncharacterized protein LOC105170479	Sesamum indicum	NA	NA	NA	NA	NA
TR33468|c0_g2_i1	624	76	-3.03747	6.57624e-06	0.0055683	Yes	PREDICTED: peptidyl-prolyl cis-trans isomerase FKBP17-2, chloroplastic	Sesamum indicum	NA	NA	NA	NA	NA
TR31131|c0_g1_i9	1346	176	-2.93503	6.19409e-06	0.00547637	Yes	PREDICTED: uncharacterized protein LOC105161139	Sesamum indicum	NA	NA	NA	NA	NA
TR7156|c0_g1_i1	446	48	-3.21594	5.39958e-06	0.00485094	Yes	cation-dependent phenylpropanoid and flavonoid O-methyltransferase	Ocimum basilicum	Lamiaceae	methylation[GO:0032259]	O-methyltransferase activity[GO:0008171]	NA	NA
TR29763|c3_g1_i2	492	54	-3.18763	4.81853e-06	0.00439757	Yes	NA	NA	NA	NA	NA	NA	NA
TR37855|c1_g2_i1	752	90	-3.06274	4.14044e-06	0.00383712	Yes	PREDICTED: uncharacterized protein LOC105155746	Sesamum indicum	NA	NA	NA	NA	NA
TR3099|c0_g5_i5	696	82	-3.08539	4.09068e-06	0.00391507	Yes	PREDICTED: protein GAST1-like	Sesamum indicum	NA	NA	NA	NA	NA
TR31283|c0_g3_i3	784	94	-3.06012	3.96187e-06	0.00385381	Yes	PREDICTED: uncharacterized protein LOC105160017	Sesamum indicum	NA	NA	NA	NA	NA
TR23138|c0_g1_i1	3270	352	-3.21564	3.89901e-06	0.00385974	Yes	NA	NA	NA	NA	NA	NA	NA
TR31131|c0_g1_i2	1568	190	-3.04485	3.28305e-06	0.00342004	Yes	PREDICTED: uncharacterized protein LOC105161139	Sesamum indicum	NA	NA	NA	NA	NA
TR34379|c0_g4_i2	1486	178	-3.06148	2.86168e-06	0.00303633	Yes	PREDICTED: proline-rich protein 4	Sesamum indicum	NA	NA	NA	NA	NA
TR38496|c1_g1_i3	596	64	-3.21917	2.52547e-06	0.00273573	Yes	hypothetical protein MIMGU_mgv1a006158mg	Mimulus guttatus	NA	NA	NA	NA	NA
TR34270|c2_g5_i1	224	16	-3.80735	2.37342e-06	0.00271346	Yes	NA	NA	NA	NA	NA	NA	NA
TR37634|c0_g4_i2	1182	138	-3.09849	2.20154e-06	0.00262164	Yes	PREDICTED: uncharacterized protein LOC105171465	Sesamum indicum	NA	NA	NA	NA	NA
TR43015|c0_g1_i3	884	98	-3.17319	1.69521e-06	0.00211201	Yes	hypothetical protein MIMGU_mgv1a026830mg	Mimulus guttatus	NA	phosphorylation[GO:0016310]	protein kinase activity[GO:0004672] ; nucleotide binding[GO:0000166]	membrane[GO:0016020]	NA
TR40235|c0_g6_i2	732	78	-3.2303	1.57335e-06	0.00199291	Yes	PREDICTED: uncharacterized protein LOC105159766	Sesamum indicum	NA	NA	NA	NA	NA
TR20366|c0_g2_i1	336	26	-3.69188	1.09921e-06	0.00142734	Yes	NA	NA	NA	NA	NA	NA	NA
TR26397|c1_g2_i1	698	70	-3.3178	1.01213e-06	0.00134034	Yes	FER1_PEARecName: Full=Ferredoxin-1, chloroplastic; AltName: Full=Ferredoxin I; Flags: Precursor	Pisum sativum	NA	electron transport chain[GO:0022900]	metal ion binding[GO:0046872] ; electron carrier activity[GO:0009055] ; 2 iron, 2 sulfur cluster binding[GO:0051537] ; protein binding[GO:0005515]	chloroplast[GO:0009507]	NA
TR3678|c0_g1_i1	1528	162	-3.23758	9.2544e-07	0.00125609	Yes	PREDICTED: 7-deoxyloganetin glucosyltransferase-like	Sesamum indicum	NA	NA	NA	NA	NA
TR39143|c1_g6_i7	944	98	-3.26793	8.67424e-07	0.00120536	Yes	alpha tubulin	Plantago major	NA	microtubule-based process[GO:0007017] ; metabolic process[GO:0008152]	structural constituent of cytoskeleton[GO:0005200] ; GTP binding[GO:0005525] ; GTPase activity[GO:0003924]	microtubule[GO:0005874]	NA
TR36609|c3_g1_i1	4324	344	-3.65189	6.66295e-07	0.00097221	Yes	PREDICTED: non-specific lipid-transfer protein 2-like	Sesamum indicum	NA	lipid transport[GO:0006869]	lipid binding[GO:0008289]	NA	NA
TR7878|c0_g2_i3	372	28	-3.7318	6.43461e-07	0.000988037	Yes	PREDICTED: protein EARLY RESPONSIVE TO DEHYDRATION 15	Sesamum indicum	NA	NA	NA	NA	NA
TR30547|c0_g1_i3	2082	204	-3.35133	6.22469e-07	0.0009816	Yes	hypothetical protein MIMGU_mgv1a016162mg	Mimulus guttatus	NA	NA	NA	NA	NA
TR42502|c1_g1_i4	1416	142	-3.31786	5.28317e-07	0.000856401	Yes	PREDICTED: linoleate 13S-lipoxygenase 2-1, chloroplastic-like	Sesamum indicum	NA	NA	NA	NA	NA
TR28566|c0_g1_i2	708	66	-3.42321	5.18701e-07	0.000865855	Yes	PREDICTED: uncharacterized protein LOC105159891	Sesamum indicum	NA	NA	NA	NA	NA
TR36875|c1_g5_i8	1856	176	-3.39855	3.82967e-07	0.000657757	Yes	PREDICTED: oxygen-evolving enhancer protein 1, chloroplastic-like	Sesamum indicum	NA	NA	NA	NA	NA
TR31419|c2_g1_i2	470	36	-3.70659	3.19685e-07	0.000566216	Yes	hypothetical protein MIMGU_mgv1a014196mg	Mimulus guttatus	NA	NA	NA	NA	NA
TR2497|c0_g3_i1	1924	176	-3.45046	2.85103e-07	0.000520045	Yes	lipid transfer protein 1	Salvia miltiorrhiza	NA	lipid transport[GO:0006869]	lipid binding[GO:0008289]	NA	NA
TR30351|c0_g2_i1	472	34	-3.79518	1.9349e-07	0.000375649	Yes	PREDICTED: elongation factor 1-alpha-like	Gossypium raimondii	NA	NA	NA	NA	NA
TR42436|c0_g1_i1	288	16	-4.16993	1.92429e-07	0.000386589	Yes	NA	NA	NA	NA	NA	NA	NA
TR42641|c0_g17_i2	518	38	-3.76888	1.59857e-07	0.000333663	Yes	pyrophosphatase, partial	Solanum pimpinellifolium	NA	metabolic process[GO:0008152] ; proton transport[GO:0015992] ; transmembrane transport[GO:0055085]	inorganic diphosphatase activity[GO:0004427] ; hydrogen-translocating pyrophosphatase activity[GO:0009678]	integral component of membrane[GO:0016021]	map00190:Oxidative phosphorylation(diphosphatase[ec:3.6.1.1])
TR31236|c7_g3_i1	644	48	-3.74595	9.19607e-08	0.000206614	Yes	polyubiquitin	Lemna minor	NA	NA	NA	NA	NA
TR30751|c1_g2_i4	794	62	-3.6788	8.3686e-08	0.000195493	Yes	PREDICTED: ferritin-3, chloroplastic	Sesamum indicum	NA	NA	NA	NA	NA
TR2383|c0_g3_i1	1576	128	-3.62205	7.23415e-08	0.000175903	Yes	photosystem I reaction center subunit XI, partial (chloroplast)	Camellia sinensis	NA	photosynthesis[GO:0015979]	NA	integral component of membrane[GO:0016021] ; photosystem I reaction center[GO:0009538] ; chloroplast[GO:0009507]	NA
TR43910|c2_g6_i1	774	52	-3.89575	2.25244e-08	6.25618e-05	Yes	PREDICTED: glycine dehydrogenase [decarboxylating], mitochondrial-like, partial	Glycine max	NA	NA	NA	NA	NA
TR26397|c1_g4_i2	1252	88	-3.83059	1.70406e-08	4.96323e-05	Yes	NA	NA	NA	NA	NA	NA	NA
TR40235|c0_g7_i1	448	22	-4.34792	1.21778e-08	3.95761e-05	Yes	PREDICTED: uncharacterized protein LOC105159766	Sesamum indicum	NA	NA	NA	NA	NA
TR39848|c0_g4_i2	482	24	-4.32793	9.58755e-09	3.29394e-05	Yes	NA	NA	NA	NA	NA	NA	NA
TR1667|c0_g1_i1	1262	82	-3.94394	7.85545e-09	2.86846e-05	Yes	hypothetical protein MIMGU_mgv1a015996mg	Mimulus guttatus	NA	NA	NA	NA	NA
TR31831|c1_g1_i1	924	56	-4.04439	5.86049e-09	2.28114e-05	Yes	hypothetical protein GLYMA_02G064700	Glycine max	NA	photosynthesis, light harvesting[GO:0009765] ; protein-chromophore linkage[GO:0018298]	chlorophyll binding[GO:0016168]	photosystem II[GO:0009523] ; integral component of membrane[GO:0016021] ; chloroplast[GO:0009507]	NA
TR31788|c0_g1_i2	2102	126	-4.06027	5.26868e-09	2.198e-05	Yes	NA	NA	NA	NA	NA	NA	NA
TR24857|c0_g1_i1	508	24	-4.40372	4.94091e-09	2.21886e-05	Yes	NA	NA	NA	NA	NA	NA	NA
TR32959|c2_g3_i3	446	18	-4.63097	2.8458e-09	1.38679e-05	Yes	PREDICTED: uncharacterized protein LOC101252889	Solanum lycopersicum	NA	NA	NA	NA	NA
TR19069|c0_g1_i1	604	28	-4.43105	1.93444e-09	1.12695e-05	Yes	NA	NA	NA	NA	NA	NA	NA
TR30978|c1_g1_i4	522	18	-4.85798	3.63915e-10	3.03633e-06	Yes	hypothetical protein MIMGU_mgv1a020924mg	Mimulus guttatus	NA	translation[GO:0006412]	structural constituent of ribosome[GO:0003735]	ribosome[GO:0005840]	NA
TR35166|c0_g5_i3	994	44	-4.49767	2.55232e-10	2.48162e-06	Yes	PREDICTED: thioredoxin-like protein CDSP32, chloroplastic	Nicotiana sylvestris	NA	NA	NA	NA	NA
TR31264|c0_g2_i3	762	30	-4.66676	1.88552e-10	2.20718e-06	Yes	PREDICTED: thaumatin-like protein	Sesamum indicum	NA	NA	NA	NA	NA
TR29261|c0_g1_i1	2080	86	-4.5961	1.23616e-10	1.81012e-06	Yes	PREDICTED: tryptophan aminotransferase-related protein 4-like	Sesamum indicum	NA	NA	NA	NA	NA
TR23832|c2_g1_i1	8994	84	-6.74243	2.58392e-12	7.53244e-08	Yes	GCS1_OCIBARecName: Full=Gamma-cadinene synthase; AltName: Full=(+)-gamma-cadinene synthase	Ocimum basilicum	Lamiaceae	terpenoid biosynthetic process[GO:0016114]	magnesium ion binding[GO:0000287] ; terpene synthase activity[GO:0010333]	NA	NA
TR33296|c1_g1_i4	408	2232	2.4517	0.000174278	0.0477759	Yes	PREDICTED: probable leucine-rich repeat receptor-like serine/threonine-protein kinase At3g14840	Sesamum indicum	NA	NA	NA	NA	NA
TR28288|c0_g1_i1	178	938	2.39771	0.000164753	0.0462504	Yes	hypothetical protein MIMGU_mgv1a012419mg	Mimulus guttatus	NA	cellular iron ion homeostasis[GO:0006879] ; iron ion transport[GO:0006826] ; oxidation-reduction process[GO:0055114]	ferric iron binding[GO:0008199] ; ferroxidase activity[GO:0004322]	cell[GO:0005623]	map00860:Porphyrin and chlorophyll metabolism(ceruloplasmin[ec:1.16.3.1])
TR35618|c0_g2_i2	98	552	2.49381	0.000161238	0.0454824	Yes	unnamed protein product	Coffea canephora	NA	NA	calcium ion binding[GO:0005509] ; calcium-dependent phospholipid binding[GO:0005544]	NA	NA
TR33296|c1_g1_i6	328	1758	2.42217	0.000160309	0.0454398	Yes	PREDICTED: probable leucine-rich repeat receptor-like serine/threonine-protein kinase At3g14840	Sesamum indicum	NA	NA	NA	NA	NA
TR38691|c1_g2_i1	58	364	2.64981	0.000154335	0.0441754	Yes	PREDICTED: beta-fructofuranosidase, soluble isoenzyme I-like	Sesamum indicum	NA	NA	NA	NA	NA
TR33296|c1_g1_i1	386	2136	2.46824	0.000150432	0.0432703	Yes	PREDICTED: probable leucine-rich repeat receptor-like serine/threonine-protein kinase At3g14840	Sesamum indicum	NA	NA	NA	NA	NA
TR41491|c5_g4_i12	32	230	2.84549	0.000148543	0.0431521	Yes	NA	NA	NA	NA	NA	NA	NA
TR36222|c0_g2_i3	66	408	2.62803	0.000137497	0.0403447	Yes	PREDICTED: gibberellin 2-beta-dioxygenase 8-like	Sesamum indicum	NA	NA	NA	NA	NA
TR2660|c0_g1_i1	120	670	2.48113	0.000135228	0.0400817	Yes	NA	NA	NA	NA	NA	NA	NA
TR32482|c3_g3_i2	414	2358	2.50986	0.00013465	0.040114	Yes	PREDICTED: asparagine synthetase [glutamine-hydrolyzing]	Sesamum indicum	NA	NA	NA	NA	NA
TR3035|c0_g2_i1	58	370	2.6734	0.000133442	0.040164	Yes	PREDICTED: annexin D4	Sesamum indicum	NA	NA	NA	NA	NA
TR40960|c1_g3_i1	436	2520	2.53102	0.000131229	0.0397026	Yes	GDS_OCIBARecName: Full=Germacrene-D synthase; AltName: Full=(-)-germacrene D synthase	Ocimum basilicum	Lamiaceae	terpenoid biosynthetic process[GO:0016114]	magnesium ion binding[GO:0000287] ; terpene synthase activity[GO:0010333]	NA	NA
TR33296|c1_g1_i2	392	2226	2.50553	0.000127934	0.039111	Yes	PREDICTED: probable leucine-rich repeat receptor-like serine/threonine-protein kinase At3g14840	Sesamum indicum	NA	NA	NA	NA	NA
TR8065|c2_g1_i1	146	810	2.47195	0.000118912	0.0369329	Yes	hypothetical protein MIMGU_mgv1a019065mg	Mimulus guttatus	NA	NA	NA	membrane[GO:0016020]	NA
TR36532|c0_g4_i6	28	214	2.93411	0.000116724	0.0364472	Yes	NA	NA	NA	NA	NA	NA	NA
TR31278|c0_g1_i3	78	476	2.60942	0.000112602	0.0355402	Yes	hypothetical protein CISIN_1g027038mg	Citrus sinensis	NA	NA	NA	membrane[GO:0016020]	NA
TR33112|c0_g2_i5	48	326	2.76377	0.00011075	0.0351457	Yes	NA	NA	NA	NA	NA	NA	NA
TR33280|c0_g1_i2	28	218	2.96083	0.000100275	0.0325287	Yes	PREDICTED: uncharacterized protein LOC105164802	Sesamum indicum	NA	NA	NA	NA	NA
TR30583|c0_g2_i4	38	282	2.89162	8.04157e-05	0.0277789	Yes	PREDICTED: multiprotein-bridging factor 1a-like	Sesamum indicum	NA	NA	NA	NA	NA
TR8231|c0_g3_i3	20	174	3.12102	7.97726e-05	0.0277357	Yes	PREDICTED: probable protein S-acyltransferase 22 isoform X2	Sesamum indicum	NA	NA	NA	NA	NA
TR37716|c0_g1_i4	122	722	2.56512	7.84829e-05	0.0276126	Yes	NA	NA	NA	NA	NA	NA	NA
TR31787|c1_g2_i7	86	538	2.6452	7.53457e-05	0.02681	Yes	NA	NA	NA	NA	NA	NA	NA
TR7303|c0_g1_i3	28	226	3.01282	7.42622e-05	0.0266163	Yes	NA	NA	NA	NA	NA	NA	NA
TR7841|c1_g1_i6	30	238	2.98793	7.42074e-05	0.0267445	Yes	NA	NA	NA	NA	NA	NA	NA
TR36994|c1_g4_i6	270	1602	2.56884	6.33775e-05	0.0246799	Yes	PREDICTED: xyloglucan endotransglucosylase/hydrolase protein 9	Nicotiana sylvestris	NA	NA	NA	NA	NA
TR33237|c1_g3_i3	70	466	2.7349	6.13988e-05	0.0242244	Yes	alpha tubulin	Plantago major	NA	microtubule-based process[GO:0007017] ; metabolic process[GO:0008152]	structural constituent of cytoskeleton[GO:0005200] ; GTP binding[GO:0005525] ; GTPase activity[GO:0003924]	microtubule[GO:0005874]	NA
TR7734|c0_g1_i6	364	2272	2.64195	5.96773e-05	0.0237139	Yes	PREDICTED: dirigent protein 21-like	Sesamum indicum	NA	NA	NA	NA	NA
TR36505|c0_g1_i1	48	350	2.86625	5.86482e-05	0.023598	Yes	PREDICTED: 33 kDa ribonucleoprotein, chloroplastic	Sesamum indicum	NA	NA	NA	NA	NA
TR2875|c0_g1_i1	118	728	2.62515	5.55145e-05	0.0225049	Yes	PREDICTED: glutamate decarboxylase-like	Sesamum indicum	NA	NA	NA	NA	NA
TR43807|c0_g4_i4	28	240	3.09954	4.43928e-05	0.0194929	Yes	basic helix-loop-helix transcription factor	Salvia miltiorrhiza	NA	NA	protein dimerization activity[GO:0046983]	NA	NA
TR24048|c0_g1_i2	734	6704	3.19117	4.22891e-05	0.0188545	Yes	low-molecular-weight cysteine-rich 69	Jatropha curcas	NA	defense response to fungus[GO:0050832] ; killing of cells of other organism[GO:0031640]	NA	NA	NA
TR43412|c0_g2_i1	160	998	2.64097	3.93741e-05	0.017697	Yes	hypothetical protein POPTR_0001s256302g, partial	Populus trichocarpa	NA	thiamine biosynthetic process[GO:0009228]	iron-sulfur cluster binding[GO:0051536]	NA	NA
TR37716|c0_g1_i5	148	932	2.65473	3.76993e-05	0.017198	Yes	PREDICTED: flavonol synthase/flavanone 3-hydroxylase-like	Sesamum indicum	NA	NA	NA	NA	NA
TR18731|c0_g1_i1	80	548	2.7761	3.60741e-05	0.0169993	Yes	PREDICTED: protein CHLOROPLAST IMPORT APPARATUS 2-like isoform X2	Erythranthe guttatus	NA	NA	NA	NA	NA
TR42808|c5_g3_i1	60	440	2.87447	3.37006e-05	0.0163981	Yes	PREDICTED: uncharacterized protein LOC105171751	Sesamum indicum	NA	NA	NA	NA	NA
TR32482|c3_g3_i1	150	956	2.67205	3.35173e-05	0.0164378	Yes	NA	NA	NA	NA	NA	NA	NA
TR35336|c1_g4_i2	32	274	3.09803	3.29517e-05	0.0166112	Yes	cytochrome P450, partial	Lavandula angustifolia	Lamiaceae	oxidation-reduction process[GO:0055114]	heme binding[GO:0020037] ; oxidoreductase activity, acting on paired donors, with incorporation or reduction of molecular oxygen[GO:0016705] ; iron ion binding[GO:0005506]	NA	NA
TR30443|c0_g1_i1	146	938	2.68362	3.16665e-05	0.0162368	Yes	cytochrome P450 CYP76AH1	Salvia miltiorrhiza	NA	NA	metal ion binding[GO:0046872] ; oxidoreductase activity[GO:0016491]	membrane[GO:0016020]	NA
TR33019|c0_g1_i1	64	470	2.87652	2.87416e-05	0.0148303	Yes	NA	NA	NA	NA	NA	NA	NA
TR19536|c0_g1_i1	460	3512	2.93259	2.48572e-05	0.0132176	Yes	NA	NA	NA	NA	NA	NA	NA
TR27774|c0_g1_i2	34	296	3.12199	2.46346e-05	0.0131782	Yes	hypothetical protein MIMGU_mgv1a020758mg	Mimulus guttatus	NA	response to biotic stimulus[GO:0009607] ; defense response[GO:0006952]	NA	NA	NA
TR4014|c1_g6_i2	22	216	3.29546	2.40659e-05	0.0130298	Yes	PREDICTED: aquaporin TIP4-1	Sesamum indicum	NA	NA	NA	NA	NA
TR40960|c1_g2_i7	128	880	2.78136	1.85938e-05	0.0105444	Yes	GDS_OCIBARecName: Full=Germacrene-D synthase; AltName: Full=(-)-germacrene D synthase	Ocimum basilicum	Lamiaceae	terpenoid biosynthetic process[GO:0016114]	magnesium ion binding[GO:0000287] ; terpene synthase activity[GO:0010333]	NA	NA
TR7841|c1_g1_i2	154	1048	2.76664	1.81571e-05	0.0104188	Yes	NA	NA	NA	NA	NA	NA	NA
TR40311|c1_g6_i3	24	240	3.32193	1.64513e-05	0.00953912	Yes	cytochrome P450 CYP96A85	Salvia miltiorrhiza	NA	NA	metal ion binding[GO:0046872] ; oxidoreductase activity[GO:0016491]	NA	NA
TR29585|c0_g1_i4	44	376	3.09516	1.59524e-05	0.00934256	Yes	basic helix-loop-helix transcription factor	Salvia miltiorrhiza	NA	NA	NA	NA	NA
TR26806|c0_g1_i4	34	312	3.19794	1.51385e-05	0.00899698	Yes	PREDICTED: NADH--cytochrome b5 reductase 1-like	Sesamum indicum	NA	NA	NA	NA	NA
TR21683|c2_g1_i1	236	1660	2.81432	1.46603e-05	0.00884895	Yes	PREDICTED: 1-aminocyclopropane-1-carboxylate oxidase homolog 1-like	Sesamum indicum	NA	NA	NA	NA	NA
TR29928|c0_g1_i4	68	530	2.96239	1.38982e-05	0.00845453	Yes	hypothetical protein B456_009G362500	Gossypium raimondii	NA	nucleotide-sugar metabolic process[GO:0009225]	dTDP-glucose 4,6-dehydratase activity[GO:0008460]	NA	map01130:Biosynthesis of antibiotics(4,6-dehydratase[ec:4.2.1.46]) ; map00525:Acarbose and validamycin biosynthesis(4,6-dehydratase[ec:4.2.1.46]) ; map00523:Polyketide sugar unit biosynthesis(4,6-dehydratase[ec:4.2.1.46]) ; map00521:Streptomycin biosynthesis(4,6-dehydratase[ec:4.2.1.46]) ; map01055:Biosynthesis of vancomycin group antibiotics(4,6-dehydratase[ec:4.2.1.46])
TR39570|c0_g2_i2	78	594	2.92892	1.33779e-05	0.0082362	Yes	PREDICTED: probable carotenoid cleavage dioxygenase 4, chloroplastic	Sesamum indicum	NA	NA	NA	NA	NA
TR7841|c1_g1_i1	100	732	2.87184	1.33391e-05	0.00826171	Yes	NA	NA	NA	NA	NA	NA	NA
TR43055|c2_g1_i12	64	510	2.99435	1.27008e-05	0.00797382	Yes	1-deoxy-D-xylulose 5-phosphate synthase	Plectranthus barbatus	Lamiaceae	terpenoid biosynthetic process[GO:0016114]	1-deoxy-D-xylulose-5-phosphate synthase activity[GO:0008661]	NA	map00730:Thiamine metabolism(synthase[ec:2.2.1.7]) ; map01130:Biosynthesis of antibiotics(synthase[ec:2.2.1.7]) ; map00900:Terpenoid backbone biosynthesis(synthase[ec:2.2.1.7])
TR35365|c1_g2_i3	56	466	3.05683	1.12498e-05	0.00743158	Yes	Tam3-transposase	Antirrhinum majus	NA	NA	NA	NA	NA
TR35035|c2_g1_i1	38	350	3.20328	1.11401e-05	0.00753651	Yes	SAND family protein	Rosa multiflora	NA	NA	NA	NA	NA
TR20665|c0_g1_i1	540	5622	3.38005	8.35507e-06	0.00610186	Yes	hypothetical protein MIMGU_mgv1a004071mg	Mimulus guttatus	NA	metabolic process[GO:0008152]	magnesium ion binding[GO:0000287] ; terpene synthase activity[GO:0010333]	NA	NA
TR29364|c0_g1_i1	394	3402	3.11012	8.1373e-06	0.00601649	Yes	PREDICTED: metallothionein-like protein type 2	Sesamum indicum	NA	NA	NA	NA	NA
TR40707|c0_g1_i4	84	664	2.98272	8.09023e-06	0.00605619	Yes	hypothetical protein MIMGU_mgv1a003047mg	Mimulus guttatus	NA	fatty acid biosynthetic process[GO:0006633] ; oxidation-reduction process[GO:0055114]	oxidoreductase activity[GO:0016491] ; iron ion binding[GO:0005506]	integral component of membrane[GO:0016021]	NA
TR22383|c0_g1_i1	102	784	2.94228	8.04319e-06	0.00609693	Yes	PREDICTED: probable 2-oxoglutarate/Fe(II)-dependent dioxygenase	Sesamum indicum	NA	NA	NA	NA	NA
TR29664|c0_g2_i3	152	1132	2.89673	7.94802e-06	0.00610801	Yes	NA	NA	NA	NA	NA	NA	NA
TR28020|c0_g1_i3	20	232	3.53605	6.96653e-06	0.00565257	Yes	NA	NA	NA	NA	NA	NA	NA
TR39787|c0_g2_i1	66	554	3.06935	6.96634e-06	0.00557514	Yes	PREDICTED: polyphenol oxidase I, chloroplastic-like	Sesamum indicum	NA	NA	NA	NA	NA
TR33723|c0_g1_i2	22	250	3.50635	6.42677e-06	0.00552138	Yes	NA	NA	NA	NA	NA	NA	NA
TR29585|c0_g1_i2	62	532	3.10109	6.39442e-06	0.00556893	Yes	basic helix-loop-helix transcription factor	Salvia miltiorrhiza	NA	NA	DNA binding[GO:0003677] ; protein dimerization activity[GO:0046983]	NA	NA
TR26216|c0_g1_i2	22	262	3.57399	4.11897e-06	0.00388018	Yes	NA	NA	NA	NA	NA	NA	NA
TR36360|c1_g1_i1	346	3214	3.21553	3.73254e-06	0.00375515	Yes	PREDICTED: subtilisin-like protease SBT1.7	Erythranthe guttatus	NA	NA	NA	NA	NA
TR40311|c1_g8_i1	20	248	3.63227	3.73168e-06	0.00382103	Yes	cytochrome P450 CYP96A85	Salvia miltiorrhiza	NA	NA	metal ion binding[GO:0046872] ; oxidoreductase activity[GO:0016491]	NA	NA
TR35107|c3_g1_i9	50	494	3.30451	2.50507e-06	0.00276531	Yes	borneol dehydrogenase	Lavandula x intermedia	NA	oxidation-reduction process[GO:0055114]	oxidoreductase activity[GO:0016491]	NA	NA
TR28020|c0_g1_i2	18	242	3.74894	2.39341e-06	0.00268374	Yes	NA	NA	NA	NA	NA	NA	NA
TR8238|c0_g10_i1	38	408	3.4245	2.32978e-06	0.00272102	Yes	PREDICTED: arginine decarboxylase	Sesamum indicum	NA	NA	NA	NA	NA
TR24667|c1_g1_i2	112	974	3.12042	2.13657e-06	0.00260327	Yes	hypothetical protein MIMGU_mgv1a008654mg	Mimulus guttatus	NA	NA	NA	NA	NA
TR17361|c0_g1_i1	316	3746	3.56735	6.74445e-07	0.000959891	Yes	SMLII	Salvia miltiorrhiza	NA	NA	NA	NA	NA
TR41203|c2_g1_i4	18	276	3.9386	6.51883e-07	0.000976178	Yes	PREDICTED: mitochondrial chaperone BCS1-like	Cucumis sativus	NA	NA	ATP binding[GO:0005524]	integral component of membrane[GO:0016021]	NA
TR3732|c1_g2_i9	42	536	3.67377	2.44591e-07	0.000461477	Yes	PREDICTED: uncharacterized protein LOC105964377	Erythranthe guttatus	NA	NA	NA	NA	NA
TR39705|c0_g1_i4	108	1282	3.56929	9.85843e-08	0.000213235	Yes	cytochrome P450 CYP74B21	Salvia miltiorrhiza	NA	oxidation-reduction process[GO:0055114]	heme binding[GO:0020037] ; oxidoreductase activity, acting on paired donors, with incorporation or reduction of molecular oxygen[GO:0016705] ; monooxygenase activity[GO:0004497] ; iron ion binding[GO:0005506]	NA	NA
TR29041|c0_g2_i6	30	516	4.10434	2.44028e-08	6.19452e-05	Yes	PREDICTED: 30S ribosomal protein S13, chloroplastic	Sesamum indicum	NA	NA	NA	NA	NA
TR29823|c0_g1_i1	26	472	4.1822	2.32802e-08	6.18414e-05	Yes	SMLII	Salvia miltiorrhiza	NA	NA	NA	NA	NA
TR42641|c0_g17_i1	16	362	4.49985	1.55907e-08	4.79421e-05	Yes	NA	NA	NA	NA	NA	NA	NA
TR43055|c2_g1_i11	58	1034	4.15604	2.29545e-09	1.2209e-05	Yes	1-deoxy-D-xylulose 5-phosphate synthase	Plectranthus barbatus	Lamiaceae	terpenoid biosynthetic process[GO:0016114]	1-deoxy-D-xylulose-5-phosphate synthase activity[GO:0008661]	NA	map00730:Thiamine metabolism(synthase[ec:2.2.1.7]) ; map01130:Biosynthesis of antibiotics(synthase[ec:2.2.1.7]) ; map00900:Terpenoid backbone biosynthesis(synthase[ec:2.2.1.7])
TR7734|c0_g1_i1	134	2944	4.45747	8.92935e-10	5.79368e-06	Yes	NA	NA	NA	NA	NA	NA	NA
TR7734|c0_g1_i4	136	3460	4.66909	4.12863e-10	3.01444e-06	Yes	PREDICTED: dirigent protein 21-like	Sesamum indicum	NA	NA	NA	NA	NA
TR24667|c1_g1_i3	96	3192	5.05528	2.17203e-11	4.22362e-07	Yes	hypothetical protein MIMGU_mgv1a008654mg	Mimulus guttatus	NA	NA	NA	NA	NA
TR7734|c0_g1_i2	62	6762	6.76904	1.1481e-13	6.71496e-09	Yes	PREDICTED: dirigent protein 21-like	Sesamum indicum	NA	NA	NA	NA	NA
TR18788|c0_g1_i1	48	56	0.222392	0.789739	1.07463	No	hypothetical protein M569_09565, partial	Genlisea aurea	NA	tricarboxylic acid cycle[GO:0006099] ; carbon fixation[GO:0015977]	phosphoenolpyruvate carboxylase activity[GO:0008964]	NA	map00720:Carbon fixation pathways in prokaryotes(carboxylase[ec:4.1.1.31]) ; map00620:Pyruvate metabolism(carboxylase[ec:4.1.1.31]) ; map00710:Carbon fixation in photosynthetic organisms(carboxylase[ec:4.1.1.31]) ; map00680:Methane metabolism(carboxylase[ec:4.1.1.31])
TR2323|c0_g1_i2	48	56	0.222392	0.789739	1.07461	No	PREDICTED: reticulon-like protein B12	Sesamum indicum	NA	NA	NA	NA	NA
TR34539|c0_g1_i1	48	56	0.222392	0.789739	1.07421	No	PREDICTED: protein BASIC PENTACYSTEINE1-like	Sesamum indicum	NA	NA	NA	NA	NA
TR41085|c0_g1_i1	48	56	0.222392	0.789739	1.07443	No	hypothetical protein MIMGU_mgv1a003242mg	Mimulus guttatus	NA	phosphorelay signal transduction system[GO:0000160] ; signal transduction by protein phosphorylation[GO:0023014]	phosphorelay sensor kinase activity[GO:0000155]	intracellular[GO:0005622] ; integral component of membrane[GO:0016021]	NA
TR43260|c1_g1_i5	48	56	0.222392	0.789739	1.07448	No	hypothetical protein MIMGU_mgv1a003414mg	Mimulus guttatus	NA	transport[GO:0006810]	transporter activity[GO:0005215]	integral component of membrane[GO:0016021]	NA
TR43365|c0_g3_i1	48	56	0.222392	0.789739	1.07451	No	PREDICTED: glutamate--tRNA ligase, cytoplasmic	Sesamum indicum	NA	NA	NA	NA	NA
TR44562|c2_g1_i2	48	56	0.222392	0.789739	1.07453	No	PREDICTED: trafficking protein particle complex subunit 11	Sesamum indicum	NA	NA	NA	NA	NA
TR8055|c0_g3_i1	48	56	0.222392	0.789739	1.07458	No	PREDICTED: probable amino acid permease 7	Sesamum indicum	NA	NA	NA	NA	NA
TR8226|c0_g1_i5	48	56	0.222392	0.789739	1.07403	No	PREDICTED: uncharacterized protein LOC105164103	Sesamum indicum	NA	NA	NA	NA	NA
TR29564|c0_g4_i1	56	48	-0.222392	0.789739	1.07468	No	PREDICTED: sphingoid long-chain bases kinase 1-like	Sesamum indicum	NA	NA	NA	NA	NA
TR29694|c0_g2_i6	56	48	-0.222392	0.789739	1.07471	No	NA	NA	NA	NA	NA	NA	NA
TR32033|c0_g1_i5	56	48	-0.222392	0.789739	1.07473	No	hypothetical protein M569_00304, partial	Genlisea aurea	NA	cell morphogenesis[GO:0000902]	NA	NA	NA
TR36934|c0_g7_i1	56	48	-0.222392	0.789739	1.07486	No	PREDICTED: E3 ubiquitin-protein ligase RLIM	Sesamum indicum	NA	NA	NA	NA	NA
TR37113|c0_g2_i1	56	48	-0.222392	0.789739	1.07488	No	unknown	Zea mays	NA	cell redox homeostasis[GO:0045454] ; oxidation-reduction process[GO:0055114]	flavin adenine dinucleotide binding[GO:0050660] ; oxidoreductase activity[GO:0016491]	cell[GO:0005623]	NA
TR37645|c0_g1_i5	56	48	-0.222392	0.789739	1.07491	No	3R MYB protein	Rehmannia glutinosa	NA	NA	NA	NA	NA
TR43344|c0_g1_i4	56	48	-0.222392	0.789739	1.07516	No	PREDICTED: uncharacterized protein LOC105158314	Sesamum indicum	NA	NA	NA	NA	NA
TR2589|c0_g11_i2	286	322	0.171046	0.789712	1.07527	No	NA	NA	NA	NA	NA	NA	NA
TR29041|c0_g1_i1	322	286	-0.171046	0.789712	1.0753	No	PREDICTED: 30S ribosomal protein S13, chloroplastic	Sesamum indicum	NA	NA	NA	NA	NA
TR33247|c0_g1_i1	342	304	-0.169925	0.789637	1.07522	No	PREDICTED: uncharacterized protein LOC105164370	Sesamum indicum	NA	NA	NA	NA	NA
TR43734|c0_g1_i2	342	304	-0.169925	0.789637	1.07525	No	PREDICTED: ABC transporter G family member 22 isoform X1	Erythranthe guttatus	NA	metabolic process[GO:0008152]	ATPase activity[GO:0016887] ; ATP binding[GO:0005524]	integral component of membrane[GO:0016021]	map00230:Purine metabolism(adenylpyrophosphatase[ec:3.6.1.3])
TR38493|c0_g2_i2	422	376	-0.16651	0.789629	1.07526	No	PREDICTED: pollen-specific protein SF21-like	Sesamum indicum	NA	NA	NA	NA	NA
TR38413|c1_g5_i1	902	806	-0.162348	0.789628	1.07529	No	PREDICTED: 60S ribosomal protein L4-1	Sesamum indicum	NA	NA	NA	NA	NA
TR39141|c1_g2_i7	322	362	0.168929	0.789605	1.07528	No	PREDICTED: uncharacterized protein LOC105177491 isoform X1	Sesamum indicum	NA	NA	NA	NA	NA
TR44778|c2_g1_i3	322	362	0.168929	0.789605	1.0753	No	NA	NA	NA	NA	NA	NA	NA
TR43427|c0_g4_i3	362	322	-0.168929	0.789605	1.07533	No	PREDICTED: neutral alpha-glucosidase C	Sesamum indicum	NA	NA	NA	NA	NA
TR44816|c1_g1_i1	358	402	0.167236	0.789601	1.07535	No	PREDICTED: CCR4-NOT transcription complex subunit 1 isoform X2	Sesamum indicum	NA	NA	NA	NA	NA
TR41667|c1_g4_i4	1230	1380	0.16601	0.789468	1.07519	No	PREDICTED: T-complex protein 1 subunit zeta-like isoform X1	Nicotiana sylvestris	NA	NA	NA	NA	NA
TR31448|c0_g4_i3	974	870	-0.162906	0.789328	1.07503	No	PREDICTED: LIM domain-containing protein WLIM2b	Sesamum indicum	NA	NA	NA	NA	NA
TR37943|c1_g2_i2	160	182	0.185867	0.789226	1.07496	No	hypothetical protein MIMGU_mgv1a000093mg	Mimulus guttatus	NA	mRNA processing[GO:0006397]	nucleic acid binding[GO:0003676]	nucleus[GO:0005634]	NA
TR40627|c0_g1_i4	160	182	0.185867	0.789226	1.07499	No	PREDICTED: uncharacterized protein LOC105965542	Erythranthe guttatus	NA	NA	NA	NA	NA
TR38699|c2_g1_i4	182	160	-0.185867	0.789226	1.07494	No	PREDICTED: uncharacterized protein LOC105167163 isoform X1	Sesamum indicum	NA	NA	NA	NA	NA
TR42456|c1_g6_i3	182	160	-0.185867	0.789226	1.07491	No	PREDICTED: kinesin-like protein KIF3A	Sesamum indicum	NA	NA	NA	NA	NA
TR37426|c0_g2_i5	126	144	0.192645	0.78919	1.07509	No	flavonoid-3'-hydroxylase, partial	Prunus avium	NA	oxidation-reduction process[GO:0055114]	heme binding[GO:0020037] ; oxidoreductase activity, acting on paired donors, with incorporation or reduction of molecular oxygen[GO:0016705] ; monooxygenase activity[GO:0004497] ; iron ion binding[GO:0005506]	NA	NA
TR40046|c1_g11_i1	126	144	0.192645	0.78919	1.07499	No	HPPD_SOLSCRecName: Full=4-hydroxyphenylpyruvate dioxygenase; AltName: Full=4-hydroxyphenylpyruvic acid oxidase; Short=4HPPD; Short=HPD; Short=HPPDase	Plectranthus scutellarioides	Lamiaceae	tyrosine catabolic process[GO:0006572] ; L-phenylalanine catabolic process[GO:0006559] ; oxidation-reduction process[GO:0055114]	metal ion binding[GO:0046872] ; 4-hydroxyphenylpyruvate dioxygenase activity[GO:0003868]	cytoplasm[GO:0005737]	map00130:Ubiquinone and other terpenoid-quinone biosynthesis(dioxygenase[ec:1.13.11.27]) ; map00350:Tyrosine metabolism(dioxygenase[ec:1.13.11.27]) ; map00360:Phenylalanine metabolism(dioxygenase[ec:1.13.11.27])
TR42528|c0_g1_i2	126	144	0.192645	0.78919	1.07501	No	hypothetical protein MIMGU_mgv1a003484mg	Mimulus guttatus	NA	NA	phosphatidylinositol binding[GO:0035091]	NA	NA
TR7442|c0_g1_i1	126	144	0.192645	0.78919	1.07504	No	PREDICTED: U5 small nuclear ribonucleoprotein 40 kDa protein	Sesamum indicum	NA	NA	NA	NA	NA
TR32605|c0_g2_i1	144	126	-0.192645	0.78919	1.07506	No	PREDICTED: xyloglucan glycosyltransferase 4-like	Sesamum indicum	NA	NA	NA	NA	NA
TR37220|c0_g1_i2	144	126	-0.192645	0.78919	1.07496	No	hypothetical protein MIMGU_mgv1a011152mg	Mimulus guttatus	NA	NA	chaperone binding[GO:0051087]	NA	NA
TR40191|c0_g1_i2	144	126	-0.192645	0.78919	1.07511	No	PREDICTED: casein kinase I isoform alpha-like isoform X2	Sesamum indicum	NA	NA	NA	NA	NA
TR40956|c0_g2_i1	144	126	-0.192645	0.78919	1.07514	No	PREDICTED: ninja-family protein mc410	Sesamum indicum	NA	NA	NA	NA	NA
TR44140|c1_g5_i2	144	126	-0.192645	0.78919	1.07516	No	PREDICTED: uncharacterized protein LOC105178745	Sesamum indicum	NA	NA	NA	NA	NA
TR8037|c0_g1_i4	144	126	-0.192645	0.78919	1.07519	No	NA	NA	NA	NA	NA	NA	NA
TR12107|c0_g1_i2	62	72	0.215729	0.789183	1.07521	No	NA	NA	NA	NA	NA	NA	NA
TR13349|c0_g1_i1	62	72	0.215729	0.789183	1.07571	No	PREDICTED: mitogen-activated protein kinase kinase kinase YODA-like	Sesamum indicum	NA	NA	NA	NA	NA
TR24032|c0_g1_i2	62	72	0.215729	0.789183	1.07526	No	PREDICTED: nematode resistance protein-like HSPRO2	Sesamum indicum	NA	NA	NA	NA	NA
TR26696|c0_g3_i4	62	72	0.215729	0.789183	1.07528	No	PREDICTED: uncharacterized protein LOC105174944	Sesamum indicum	NA	NA	NA	NA	NA
TR34153|c0_g1_i5	62	72	0.215729	0.789183	1.07531	No	NA	NA	NA	NA	NA	NA	NA
TR34317|c0_g2_i9	62	72	0.215729	0.789183	1.07533	No	PREDICTED: UDP-N-acetylglucosamine transferase subunit ALG14 homolog isoform X2	Sesamum indicum	NA	NA	NA	NA	NA
TR36989|c0_g2_i3	62	72	0.215729	0.789183	1.07536	No	PREDICTED: uncharacterized protein LOC105164835 isoform X1	Sesamum indicum	NA	NA	NA	NA	NA
TR38125|c1_g3_i3	62	72	0.215729	0.789183	1.07538	No	hypothetical protein MIMGU_mgv1a009862mg	Mimulus guttatus	NA	transmembrane transport[GO:0055085]	NA	integral component of membrane[GO:0016021]	NA
TR38235|c0_g1_i8	62	72	0.215729	0.789183	1.07541	No	NA	NA	NA	NA	NA	NA	NA
TR39642|c0_g2_i2	62	72	0.215729	0.789183	1.07543	No	PREDICTED: aspartic proteinase nepenthesin-1-like	Sesamum indicum	NA	NA	NA	NA	NA
TR41915|c0_g4_i1	62	72	0.215729	0.789183	1.07546	No	NA	NA	NA	NA	NA	NA	NA
TR43140|c1_g2_i1	62	72	0.215729	0.789183	1.07548	No	PREDICTED: clustered mitochondria protein-like isoform X1	Erythranthe guttatus	NA	NA	NA	NA	NA
TR7982|c0_g2_i1	62	72	0.215729	0.789183	1.07551	No	NA	NA	NA	NA	NA	NA	NA
TR18016|c0_g1_i1	72	62	-0.215729	0.789183	1.07553	No	NA	NA	NA	NA	NA	NA	NA
TR30215|c0_g5_i12	72	62	-0.215729	0.789183	1.07556	No	PREDICTED: uncharacterized protein LOC104091455	Nicotiana tomentosiformis	NA	NA	NA	NA	NA
TR34050|c0_g1_i1	72	62	-0.215729	0.789183	1.07558	No	PREDICTED: protein disulfide-isomerase LQY1 isoform X1	Sesamum indicum	NA	NA	NA	NA	NA
TR39282|c0_g3_i1	72	62	-0.215729	0.789183	1.07561	No	PREDICTED: 4-hydroxy-tetrahydrodipicolinate reductase 2, chloroplastic-like	Sesamum indicum	NA	NA	NA	NA	NA
TR39636|c0_g5_i1	72	62	-0.215729	0.789183	1.07563	No	PREDICTED: RNA polymerase I-specific transcription initiation factor RRN3	Sesamum indicum	NA	NA	NA	NA	NA
TR40927|c1_g5_i4	72	62	-0.215729	0.789183	1.07566	No	PREDICTED: putative clathrin assembly protein At2g01600	Sesamum indicum	NA	NA	NA	NA	NA
TR41378|c1_g1_i4	72	62	-0.215729	0.789183	1.07568	No	PREDICTED: 3-ketoacyl-CoA synthase 11	Sesamum indicum	NA	NA	NA	NA	NA
TR41401|c0_g1_i12	72	62	-0.215729	0.789183	1.07523	No	PREDICTED: sodium/hydrogen exchanger 6-like	Erythranthe guttatus	NA	NA	NA	NA	NA
TR41655|c0_g1_i1	72	62	-0.215729	0.789183	1.07573	No	PREDICTED: alpha-L-arabinofuranosidase 1-like	Sesamum indicum	NA	NA	NA	NA	NA
TR43627|c0_g12_i2	72	62	-0.215729	0.789183	1.07583	No	PREDICTED: probable methyltransferase PMT14, partial	Camelina sativa	NA	NA	NA	NA	NA
TR44378|c0_g2_i2	72	62	-0.215729	0.789183	1.07578	No	PREDICTED: probable ATP-dependent RNA helicase DHX37	Sesamum indicum	NA	NA	NA	NA	NA
TR44544|c1_g1_i2	72	62	-0.215729	0.789183	1.07581	No	PREDICTED: symplekin	Sesamum indicum	NA	NA	NA	NA	NA
TR8284|c0_g1_i1	72	62	-0.215729	0.789183	1.07576	No	PREDICTED: probable ATP-dependent DNA helicase HFM1	Sesamum indicum	NA	NA	NA	NA	NA
TR35142|c0_g2_i1	732	654	-0.162553	0.789154	1.07582	No	PREDICTED: pyruvate, phosphate dikinase regulatory protein 2-like	Sesamum indicum	NA	NA	NA	NA	NA
TR44873|c0_g1_i2	1136	1274	0.165402	0.789027	1.07567	No	PREDICTED: helicase protein MOM1	Sesamum indicum	NA	NA	NA	NA	NA
TR3582|c0_g3_i5	674	602	-0.162985	0.788877	1.07549	No	NA	NA	NA	NA	NA	NA	NA
TR22739|c0_g3_i2	972	868	-0.163261	0.788861	1.0755	No	Chaperone protein ClpC	Morus notabilis	NA	protein metabolic process[GO:0019538]	ATP binding[GO:0005524]	NA	NA
TR31908|c0_g3_i1	460	410	-0.16601	0.788846	1.0755	No	PREDICTED: phosphoglycerate mutase-like protein 1 isoform X1	Sesamum indicum	NA	NA	NA	NA	NA
TR8294|c1_g1_i2	916	1026	0.163611	0.788816	1.07548	No	PREDICTED: uncharacterized protein LOC105173333	Sesamum indicum	NA	NA	NA	NA	NA
TR37072|c0_g1_i1	550	616	0.163499	0.788748	1.07542	No	PREDICTED: protein MITOFERRINLIKE 1, chloroplastic	Sesamum indicum	NA	NA	NA	NA	NA
TR42209|c0_g2_i3	616	550	-0.163499	0.788748	1.07544	No	NA	NA	NA	NA	NA	NA	NA
TR39521|c1_g4_i3	260	230	-0.176878	0.7887	1.0754	No	PREDICTED: protein DA1-related 1-like isoform X1	Solanum tuberosum	NA	NA	zinc ion binding[GO:0008270]	NA	NA
TR2214|c3_g9_i1	212	240	0.17897	0.788695	1.07542	No	AF195224_1ubiquitin fusion protein	Pyrus pyrifolia	NA	translation[GO:0006412]	structural constituent of ribosome[GO:0003735]	ribosome[GO:0005840]	NA
TR24734|c0_g1_i1	212	240	0.17897	0.788695	1.07544	No	PREDICTED: protein ROS1-like	Sesamum indicum	NA	NA	NA	NA	NA
TR29650|c0_g1_i2	212	240	0.17897	0.788695	1.07547	No	PREDICTED: 50S ribosomal protein L28, chloroplastic	Sesamum indicum	NA	NA	NA	NA	NA
TR43946|c0_g1_i1	240	212	-0.17897	0.788695	1.07549	No	PREDICTED: nuclear pore complex protein NUP133	Sesamum indicum	NA	NA	NA	NA	NA
TR41144|c0_g3_i1	248	280	0.175087	0.788629	1.07543	No	PREDICTED: UPF0503 protein At3g09070, chloroplastic-like	Sesamum indicum	NA	NA	NA	NA	NA
TR43475|c0_g1_i3	280	248	-0.175087	0.788629	1.07546	No	SQUAMOSA promoter binding protein-like 13, partial	Salvia miltiorrhiza	NA	NA	DNA binding[GO:0003677]	integral component of membrane[GO:0016021] ; nucleus[GO:0005634]	NA
TR44561|c0_g1_i1	654	584	-0.163322	0.788597	1.07544	No	PREDICTED: uncharacterized protein LOC105173649	Sesamum indicum	NA	NA	NA	NA	NA
TR41649|c0_g1_i4	266	300	0.173536	0.788542	1.07539	No	PREDICTED: formin-like protein 4	Sesamum indicum	NA	NA	NA	NA	NA
TR39003|c0_g2_i1	300	266	-0.173536	0.788542	1.07541	No	PREDICTED: uncharacterized protein LOC105168156	Sesamum indicum	NA	NA	NA	NA	NA
TR44213|c1_g1_i2	300	266	-0.173536	0.788542	1.07544	No	PREDICTED: restin homolog	Sesamum indicum	NA	NA	NA	NA	NA
TR41366|c0_g6_i3	194	220	0.181447	0.788519	1.07543	No	hypothetical protein MIMGU_mgv1a001750mg	Mimulus guttatus	NA	NA	ATP binding[GO:0005524]	NA	NA
TR41163|c0_g1_i1	320	360	0.169925	0.788491	1.07542	No	PREDICTED: uncharacterized protein LOC105168518 isoform X1	Sesamum indicum	NA	NA	NA	NA	NA
TR44081|c3_g5_i1	320	360	0.169925	0.788491	1.07544	No	PREDICTED: F-box/LRR-repeat protein 15-like	Sesamum indicum	NA	NA	NA	NA	NA
TR37985|c0_g1_i2	302	340	0.170986	0.788465	1.07543	No	PREDICTED: AP-3 complex subunit mu	Sesamum indicum	NA	NA	NA	NA	NA
TR42637|c0_g2_i4	302	340	0.170986	0.788465	1.07546	No	PREDICTED: scarecrow-like protein 21	Sesamum indicum	NA	NA	NA	NA	NA
TR41367|c0_g1_i6	462	518	0.165059	0.788427	1.07543	No	PREDICTED: probable galacturonosyltransferase 15	Sesamum indicum	NA	NA	NA	NA	NA
TR34795|c0_g1_i2	866	970	0.163618	0.788393	1.07541	No	PREDICTED: histone acetyltransferase GCN5 isoform X1	Sesamum indicum	NA	NA	NA	NA	NA
TR42931|c0_g6_i7	498	444	-0.165586	0.788254	1.07525	No	PREDICTED: probable plastid-lipid-associated protein 14, chloroplastic isoform X2	Sesamum indicum	NA	NA	NA	NA	NA
TR40771|c0_g1_i3	1592	1416	-0.169019	0.788253	1.07527	No	PREDICTED: probable transcriptional regulator SLK2	Sesamum indicum	NA	NA	NA	NA	NA
TR44383|c4_g1_i1	3580	3140	-0.189195	0.788191	1.07521	No	PREDICTED: protein argonaute 4	Sesamum indicum	NA	NA	NA	NA	NA
TR26383|c0_g1_i2	142	162	0.190103	0.788102	1.07516	No	hypothetical protein POPTR_0010s07340g	Populus trichocarpa	NA	polysaccharide catabolic process[GO:0000272]	beta-amylase activity[GO:0016161]	NA	map00500:Starch and sucrose metabolism(saccharogen amylase[ec:3.2.1.2])
TR27906|c0_g8_i1	142	162	0.190103	0.788102	1.07519	No	hypothetical protein Csa_7G071460	Cucumis sativus	NA	translation[GO:0006412]	structural constituent of ribosome[GO:0003735] ; RNA binding[GO:0003723]	small ribosomal subunit[GO:0015935] ; integral component of membrane[GO:0016021]	NA
TR42385|c0_g9_i2	142	162	0.190103	0.788102	1.07514	No	PREDICTED: serine/threonine-protein kinase tricorner-like	Sesamum indicum	NA	NA	NA	NA	NA
TR3569|c0_g1_i2	162	142	-0.190103	0.788102	1.07511	No	PREDICTED: protein LONGIFOLIA 2-like	Sesamum indicum	NA	NA	NA	NA	NA
TR43352|c2_g1_i3	2450	2778	0.181265	0.788096	1.07521	No	PREDICTED: uncharacterized protein LOC105167710	Sesamum indicum	NA	NA	NA	NA	NA
TR30452|c0_g1_i3	478	426	-0.166157	0.788093	1.07525	No	hypothetical protein MIMGU_mgv1a003468mg	Mimulus guttatus	NA	NA	NA	integral component of membrane[GO:0016021]	NA
TR44220|c0_g1_i3	478	426	-0.166157	0.788093	1.07523	No	PREDICTED: uncharacterized protein LOC105164739	Sesamum indicum	NA	NA	NA	NA	NA
TR35998|c0_g1_i2	176	200	0.184425	0.788027	1.07529	No	unknown	Lotus japonicus	NA	metabolic process[GO:0008152]	hydrolase activity[GO:0016787] ; zinc ion binding[GO:0008270]	NA	NA
TR8131|c1_g1_i3	176	200	0.184425	0.788027	1.07534	No	PREDICTED: uncharacterized protein LOC105169559	Sesamum indicum	NA	NA	NA	NA	NA
TR28945|c0_g1_i1	200	176	-0.184425	0.788027	1.07524	No	NA	NA	NA	NA	NA	NA	NA
TR34711|c1_g3_i2	200	176	-0.184425	0.788027	1.07526	No	PREDICTED: grpE protein homolog, mitochondrial isoform X1	Sesamum indicum	NA	NA	NA	NA	NA
TR36650|c0_g8_i2	200	176	-0.184425	0.788027	1.07519	No	hypothetical protein MIMGU_mgv1a009982mg	Mimulus guttatus	NA	positive regulation of transcription, DNA-templated[GO:0045893]	sequence-specific DNA binding[GO:0043565] ; transcription factor activity, sequence-specific DNA binding[GO:0003700] ; zinc ion binding[GO:0008270]	nucleus[GO:0005634]	NA
TR38106|c0_g4_i1	200	176	-0.184425	0.788027	1.07521	No	hypothetical protein MIMGU_mgv1a005295mg	Mimulus guttatus	NA	NA	NA	NA	NA
TR39095|c0_g9_i1	200	176	-0.184425	0.788027	1.07531	No	PREDICTED: protein IN2-1 homolog B-like	Sesamum indicum	NA	NA	NA	NA	NA
TR43096|c0_g4_i1	408	458	0.166778	0.787943	1.07525	No	PREDICTED: uncharacterized protein LOC105962724	Erythranthe guttatus	NA	NA	NA	NA	NA
TR43127|c2_g2_i3	408	458	0.166778	0.787943	1.07527	No	PREDICTED: putative late blight resistance protein homolog R1A-10	Erythranthe guttatus	NA	NA	NA	NA	NA
TR37670|c0_g1_i2	1130	1268	0.166232	0.787917	1.07526	No	hypothetical protein MIMGU_mgv1a003098mg	Mimulus guttatus	NA	metabolic process[GO:0008152]	carbon-nitrogen ligase activity, with glutamine as amido-N-donor[GO:0016884]	NA	NA
TR44755|c0_g1_i2	2254	2552	0.179141	0.78788	1.07524	No	NA	NA	NA	NA	NA	NA	NA
TR43706|c1_g1_i3	746	666	-0.163653	0.787709	1.07503	No	PREDICTED: ATP-dependent RNA helicase DHX36	Sesamum indicum	NA	NA	NA	NA	NA
TR38679|c0_g6_i3	516	460	-0.165737	0.787613	1.07492	No	PREDICTED: mitochondrial uncoupling protein 5	Sesamum indicum	NA	NA	NA	NA	NA
TR43736|c3_g6_i1	958	1074	0.164896	0.787595	1.07492	No	hypothetical protein MIMGU_mgv1a000972mg	Mimulus guttatus	NA	NA	NA	NA	NA
TR43674|c1_g2_i1	2380	2698	0.180929	0.787541	1.07487	No	PREDICTED: DNA-directed RNA polymerase II subunit 1	Sesamum indicum	NA	NA	NA	NA	NA
TR2514|c1_g9_i2	338	300	-0.172061	0.78728	1.07454	No	hypothetical protein MIMGU_mgv1a012795mg	Mimulus guttatus	NA	NA	nucleic acid binding[GO:0003676] ; nucleotide binding[GO:0000166]	NA	NA
TR35130|c0_g2_i1	338	300	-0.172061	0.78728	1.07457	No	PREDICTED: red chlorophyll catabolite reductase-like	Sesamum indicum	NA	NA	NA	NA	NA
TR35789|c0_g1_i1	580	650	0.164387	0.787269	1.07458	No	PREDICTED: peroxisome biogenesis protein 3-2	Sesamum indicum	NA	NA	NA	NA	NA
TR38091|c2_g2_i1	1172	1316	0.167187	0.787257	1.07459	No	PREDICTED: aspartate aminotransferase, chloroplastic	Nicotiana sylvestris	NA	NA	NA	NA	NA
TR42590|c0_g1_i4	318	282	-0.173332	0.787232	1.07458	No	NA	NA	NA	NA	NA	NA	NA
TR44800|c4_g3_i2	1202	1350	0.167523	0.787227	1.0746	No	PREDICTED: brefeldin A-inhibited guanine nucleotide-exchange protein 2	Sesamum indicum	NA	NA	NA	NA	NA
TR3375|c1_g1_i2	258	228	-0.178337	0.787194	1.07458	No	PREDICTED: uncharacterized protein ycf49	Sesamum indicum	NA	NA	NA	NA	NA
TR3534|c0_g1_i4	258	228	-0.178337	0.787194	1.0746	No	PREDICTED: zinc finger CCCH domain-containing protein 6-like	Sesamum indicum	NA	NA	NA	NA	NA
TR38654|c0_g1_i3	258	228	-0.178337	0.787194	1.07463	No	PREDICTED: phospho-N-acetylmuramoyl-pentapeptide-transferase homolog	Sesamum indicum	NA	NA	NA	NA	NA
TR44534|c1_g2_i1	892	796	-0.164275	0.787117	1.07455	No	hypothetical protein MIMGU_mgv1a0001592mg, partial	Mimulus guttatus	NA	metabolic process[GO:0008152]	ATP binding[GO:0005524] ; motor activity[GO:0003774]	myosin complex[GO:0016459]	NA
TR43323|c1_g1_i3	744	664	-0.164119	0.787117	1.07457	No	PREDICTED: far upstream element-binding protein 1-like	Sesamum indicum	NA	NA	NA	NA	NA
TR32867|c0_g1_i2	592	528	-0.165059	0.787064	1.07453	No	NA	NA	NA	NA	NA	NA	NA
TR2217|c1_g1_i3	210	238	0.180572	0.787063	1.07465	No	PREDICTED: protein SYS1 homolog	Sesamum indicum	NA	NA	NA	NA	NA
TR36910|c1_g1_i7	210	238	0.180572	0.787063	1.07457	No	hypothetical protein MIMGU_mgv1a010782mg	Mimulus guttatus	NA	lysine biosynthetic process via diaminopimelate[GO:0009089] ; oxidation-reduction process[GO:0055114]	4-hydroxy-tetrahydrodipicolinate reductase[GO:0008839]	NA	map00261:Monobactam biosynthesis(reductase[ec:1.17.1.8]) ; map01130:Biosynthesis of antibiotics(reductase[ec:1.17.1.8]) ; map00300:Lysine biosynthesis(reductase[ec:1.17.1.8])
TR42672|c2_g4_i8	210	238	0.180572	0.787063	1.07455	No	PREDICTED: protein NRT1/ PTR FAMILY 5.5-like isoform X2	Sesamum indicum	NA	NA	NA	NA	NA
TR44672|c0_g1_i1	210	238	0.180572	0.787063	1.07462	No	hypothetical protein MIMGU_mgv1a0001131mg, partial	Mimulus guttatus	NA	metabolic process[GO:0008152] ; microtubule-based movement[GO:0007018]	microtubule motor activity[GO:0003777]	kinesin complex[GO:0005871]	NA
TR37231|c1_g4_i1	238	210	-0.180572	0.787063	1.0746	No	unknown	Medicago truncatula	NA	glycolytic process[GO:0006096]	fructose-bisphosphate aldolase activity[GO:0004332]	NA	map00030:Pentose phosphate pathway(aldolase[ec:4.1.2.13]) ; map01130:Biosynthesis of antibiotics(aldolase[ec:4.1.2.13]) ; map00051:Fructose and mannose metabolism(aldolase[ec:4.1.2.13]) ; map00710:Carbon fixation in photosynthetic organisms(aldolase[ec:4.1.2.13]) ; map00010:Glycolysis / Gluconeogenesis(aldolase[ec:4.1.2.13]) ; map00680:Methane metabolism(aldolase[ec:4.1.2.13])
TR30992|c0_g1_i1	158	180	0.188072	0.787037	1.07464	No	PREDICTED: splicing factor U2af large subunit B-like isoform X2	Sesamum indicum	NA	NA	NA	NA	NA
TR33927|c0_g1_i2	158	180	0.188072	0.787037	1.07466	No	PREDICTED: alpha-galactosidase	Nelumbo nucifera	NA	NA	NA	NA	NA
TR35935|c0_g2_i1	158	180	0.188072	0.787037	1.07469	No	PREDICTED: tRNA-dihydrouridine(20a/20b) synthase [NAD(P)+]-like isoform X1	Sesamum indicum	NA	NA	NA	NA	NA
TR39751|c0_g1_i5	158	180	0.188072	0.787037	1.07476	No	cytochrome P450 CYP734A33	Salvia miltiorrhiza	NA	oxidation-reduction process[GO:0055114]	heme binding[GO:0020037] ; oxidoreductase activity, acting on paired donors, with incorporation or reduction of molecular oxygen[GO:0016705] ; monooxygenase activity[GO:0004497] ; iron ion binding[GO:0005506]	integral component of membrane[GO:0016021]	NA
TR3994|c0_g4_i4	158	180	0.188072	0.787037	1.07471	No	NA	NA	NA	NA	NA	NA	NA
TR41907|c0_g4_i1	180	158	-0.188072	0.787037	1.07474	No	PREDICTED: zinc finger CCCH domain-containing protein 17 isoform X2	Sesamum indicum	NA	NA	NA	NA	NA
TR37583|c0_g1_i6	476	534	0.165878	0.787033	1.07478	No	PREDICTED: uncharacterized protein LOC105177617	Sesamum indicum	NA	NA	NA	NA	NA
TR4113|c0_g6_i3	534	476	-0.165878	0.787033	1.07481	No	PREDICTED: transcription factor BTF3-like isoform 1	Solanum lycopersicum	NA	regulation of transcription, DNA-templated[GO:0006355] ; transcription, DNA-templated[GO:0006351]	NA	NA	NA
TR33839|c1_g4_i2	706	630	-0.164316	0.786992	1.07478	No	NA	NA	NA	NA	NA	NA	NA
TR26800|c1_g1_i5	108	124	0.199309	0.786947	1.07482	No	hypothetical protein MIMGU_mgv1a016226mg	Mimulus guttatus	NA	NA	NA	NA	NA
TR31599|c0_g1_i9	108	124	0.199309	0.786947	1.07477	No	PREDICTED: GATA transcription factor 15-like	Sesamum indicum	NA	NA	NA	NA	NA
TR34013|c1_g1_i2	108	124	0.199309	0.786947	1.07479	No	PREDICTED: uncharacterized protein LOC105166323	Sesamum indicum	NA	NA	NA	NA	NA
TR35682|c0_g1_i1	108	124	0.199309	0.786947	1.07474	No	PREDICTED: uncharacterized protein LOC105164957	Sesamum indicum	NA	NA	NA	NA	NA
TR37222|c2_g1_i3	108	124	0.199309	0.786947	1.07484	No	PREDICTED: LOW QUALITY PROTEIN: bark storage protein A-like	Sesamum indicum	NA	NA	NA	NA	NA
TR38248|c1_g3_i1	108	124	0.199309	0.786947	1.07487	No	PREDICTED: uncharacterized protein LOC105175517	Sesamum indicum	NA	NA	NA	NA	NA
TR38712|c2_g1_i8	108	124	0.199309	0.786947	1.07489	No	NA	NA	NA	NA	NA	NA	NA
TR41065|c0_g2_i3	108	124	0.199309	0.786947	1.07492	No	PREDICTED: uncharacterized protein LOC105170690	Sesamum indicum	NA	NA	NA	NA	NA
TR42560|c0_g1_i8	108	124	0.199309	0.786947	1.07494	No	NA	NA	NA	NA	NA	NA	NA
TR44288|c1_g1_i2	108	124	0.199309	0.786947	1.07497	No	PREDICTED: ABC transporter C family member 5-like	Sesamum indicum	NA	NA	NA	NA	NA
TR29052|c0_g8_i2	124	108	-0.199309	0.786947	1.07499	No	hypothetical protein MIMGU_mgv1a008776mg	Mimulus guttatus	NA	acetyl-CoA biosynthetic process from pyruvate[GO:0006086] ; oxidation-reduction process[GO:0055114]	pyruvate dehydrogenase (acetyl-transferring) activity[GO:0004739]	NA	map01130:Biosynthesis of antibiotics(dehydrogenase (acetyl-transferring)[ec:1.2.4.1]) ; map00020:Citrate cycle (TCA cycle)(dehydrogenase (acetyl-transferring)[ec:1.2.4.1]) ; map00620:Pyruvate metabolism(dehydrogenase (acetyl-transferring)[ec:1.2.4.1]) ; map00010:Glycolysis / Gluconeogenesis(dehydrogenase (acetyl-transferring)[ec:1.2.4.1])
TR30713|c2_g1_i1	124	108	-0.199309	0.786947	1.07502	No	PREDICTED: uncharacterized protein LOC105177905	Sesamum indicum	NA	NA	NA	NA	NA
TR35635|c0_g1_i3	124	108	-0.199309	0.786947	1.07504	No	PREDICTED: coenzyme Q-binding protein COQ10 homolog, mitochondrial-like	Sesamum indicum	NA	NA	NA	NA	NA
TR37413|c0_g1_i11	124	108	-0.199309	0.786947	1.07507	No	NA	NA	NA	NA	NA	NA	NA
TR38886|c0_g1_i2	124	108	-0.199309	0.786947	1.07509	No	PREDICTED: lysophospholipid acyltransferase 1-like	Sesamum indicum	NA	NA	NA	NA	NA
TR39987|c0_g3_i4	124	108	-0.199309	0.786947	1.07512	No	PREDICTED: LOW QUALITY PROTEIN: uncharacterized protein LOC105157180	Sesamum indicum	NA	NA	NA	NA	NA
TR40722|c0_g5_i3	124	108	-0.199309	0.786947	1.07514	No	NA	NA	NA	NA	NA	NA	NA
TR24551|c1_g1_i3	92	106	0.204358	0.786796	1.07532	No	hypothetical protein MIMGU_mgv1a004500mg	Mimulus guttatus	NA	transmembrane transport[GO:0055085]	transporter activity[GO:0005215]	integral component of membrane[GO:0016021]	NA
TR35511|c0_g2_i3	92	106	0.204358	0.786796	1.07499	No	NA	NA	NA	NA	NA	NA	NA
TR36822|c0_g1_i15	92	106	0.204358	0.786796	1.07501	No	hypothetical protein MIMGU_mgv1a0077221mg, partial	Mimulus guttatus	NA	NA	NA	NA	NA
TR37480|c0_g3_i2	92	106	0.204358	0.786796	1.07504	No	PREDICTED: LOW QUALITY PROTEIN: nuclear pore complex protein NUP1-like	Sesamum indicum	NA	NA	NA	NA	NA
TR37910|c0_g1_i3	92	106	0.204358	0.786796	1.07506	No	NA	NA	NA	NA	NA	NA	NA
TR40186|c0_g4_i4	92	106	0.204358	0.786796	1.07509	No	hypothetical protein MIMGU_mgv1a004114mg	Mimulus guttatus	NA	NA	NA	NA	NA
TR42251|c1_g2_i5	92	106	0.204358	0.786796	1.07512	No	PREDICTED: serine/threonine-protein kinase BLUS1	Sesamum indicum	NA	NA	NA	NA	NA
TR43108|c4_g2_i1	92	106	0.204358	0.786796	1.07514	No	PREDICTED: LRR receptor-like serine/threonine-protein kinase FEI 1 isoform X2	Erythranthe guttatus	NA	NA	NA	NA	NA
TR44281|c0_g3_i1	92	106	0.204358	0.786796	1.07517	No	PREDICTED: WD repeat-containing protein 75	Sesamum indicum	NA	NA	NA	NA	NA
TR23533|c0_g1_i4	106	92	-0.204358	0.786796	1.07519	No	PREDICTED: chaperone protein dnaJ 10-like	Sesamum indicum	NA	NA	NA	NA	NA
TR25323|c0_g1_i1	106	92	-0.204358	0.786796	1.07496	No	putative ubiquitin activating enzyme	Arabidopsis thaliana	NA	NA	NA	NA	NA
TR27627|c1_g1_i1	106	92	-0.204358	0.786796	1.07524	No	NA	NA	NA	NA	NA	NA	NA
TR33463|c0_g3_i1	106	92	-0.204358	0.786796	1.07527	No	hypothetical protein MIMGU_mgv1a014126mg	Mimulus guttatus	NA	small GTPase mediated signal transduction[GO:0007264] ; protein transport[GO:0015031]	GTP binding[GO:0005525]	intracellular[GO:0005622]	NA
TR34491|c0_g1_i5	106	92	-0.204358	0.786796	1.07529	No	NA	NA	NA	NA	NA	NA	NA
TR38737|c0_g7_i2	106	92	-0.204358	0.786796	1.07522	No	hypothetical protein MIMGU_mgv1a007824mg	Mimulus guttatus	NA	biosynthetic process[GO:0009058]	pyridoxal phosphate binding[GO:0030170] ; catalytic activity[GO:0003824]	NA	NA
TR40907|c0_g1_i1	780	696	-0.164387	0.78673	1.07525	No	hypothetical protein MIMGU_mgv1a002171mg	Mimulus guttatus	NA	protein phosphorylation[GO:0006468]	protein kinase activity[GO:0004672] ; ATP binding[GO:0005524]	integral component of membrane[GO:0016021]	NA
TR37189|c2_g2_i3	218	192	-0.183222	0.786729	1.07528	No	NA	NA	NA	NA	NA	NA	NA
TR43717|c0_g1_i2	218	192	-0.183222	0.786729	1.0753	No	PREDICTED: probable leucine-rich repeat receptor-like protein kinase IMK3	Erythranthe guttatus	NA	NA	NA	NA	NA
TR43287|c0_g5_i4	1380	1228	-0.168358	0.786532	1.07506	No	PREDICTED: subtilisin-like protease	Sesamum indicum	NA	NA	NA	NA	NA
TR42245|c0_g1_i1	124	142	0.195551	0.786421	1.07493	No	PREDICTED: UBP1-associated protein 2A-like	Sesamum indicum	NA	NA	NA	NA	NA
TR44216|c0_g1_i2	124	142	0.195551	0.786421	1.07495	No	PREDICTED: leukocyte receptor cluster member 8 homolog isoform X1	Sesamum indicum	NA	NA	NA	NA	NA
TR44561|c0_g2_i1	124	142	0.195551	0.786421	1.07498	No	PREDICTED: ankyrin repeat-containing protein At5g02620-like	Sesamum indicum	NA	NA	NA	NA	NA
TR31495|c1_g1_i4	142	124	-0.195551	0.786421	1.075	No	PREDICTED: late embryogenesis abundant protein Lea5	Sesamum indicum	NA	NA	NA	NA	NA
TR32517|c1_g4_i4	142	124	-0.195551	0.786421	1.07503	No	NA	NA	NA	NA	NA	NA	NA
TR36883|c0_g1_i2	142	124	-0.195551	0.786421	1.07506	No	PREDICTED: uncharacterized protein LOC105157689	Sesamum indicum	NA	NA	NA	NA	NA
TR41071|c0_g1_i6	142	124	-0.195551	0.786421	1.07508	No	hypothetical protein MIMGU_mgv1a004052mg	Mimulus guttatus	NA	metabolic process[GO:0008152]	hydrolase activity, acting on acid anhydrides[GO:0016817]	NA	NA
TR7503|c0_g2_i2	142	124	-0.195551	0.786421	1.07511	No	hypothetical protein LR48_Vigan07g094600	Vigna angularis	NA	small GTPase mediated signal transduction[GO:0007264] ; protein transport[GO:0015031]	GTP binding[GO:0005525]	intracellular[GO:0005622] ; membrane[GO:0016020]	NA
TR30602|c0_g1_i1	666	594	-0.165059	0.78628	1.07494	No	PREDICTED: ER membrane protein complex subunit 4	Sesamum indicum	NA	NA	NA	NA	NA
TR37933|c0_g1_i6	1014	1138	0.166443	0.786257	1.07493	No	PREDICTED: aldehyde dehydrogenase family 7 member B4 isoform X1	Sesamum indicum	NA	NA	NA	NA	NA
TR26416|c1_g3_i1	298	336	0.173149	0.786083	1.07472	No	PREDICTED: uncharacterized protein LOC105177484	Sesamum indicum	NA	NA	NA	NA	NA
TR40018|c1_g1_i1	982	1102	0.166329	0.78604	1.07469	No	PREDICTED: protein RIK isoform X2	Sesamum indicum	NA	NA	NA	NA	NA
TR44138|c2_g2_i3	174	198	0.186413	0.786034	1.0747	No	PREDICTED: putative E3 ubiquitin-protein ligase LIN	Sesamum indicum	NA	NA	NA	NA	NA
TR42308|c0_g3_i2	198	174	-0.186413	0.786034	1.07473	No	PREDICTED: pentatricopeptide repeat-containing protein At5g02860	Sesamum indicum	NA	NA	NA	NA	NA
TR40802|c1_g1_i2	942	840	-0.165338	0.78602	1.07473	No	PREDICTED: receptor-like serine/threonine-protein kinase ALE2 isoform X1	Sesamum indicum	NA	NA	NA	NA	NA
TR33889|c0_g2_i9	316	280	-0.174498	0.785972	1.07469	No	PREDICTED: LOW QUALITY PROTEIN: transcription initiation factor TFIID subunit 12b	Sesamum indicum	NA	NA	NA	NA	NA
TR43221|c1_g1_i6	316	280	-0.174498	0.785972	1.07472	No	NA	NA	NA	NA	NA	NA	NA
TR8274|c1_g6_i3	456	512	0.16711	0.785969	1.07474	No	Long-Chain Acyl-CoA Synthetase	Salvia miltiorrhiza	NA	metabolic process[GO:0008152]	catalytic activity[GO:0003824]	NA	NA
TR41664|c1_g6_i7	542	608	0.165778	0.785934	1.07472	No	PREDICTED: glucose-6-phosphate 1-dehydrogenase, cytoplasmic isoform-like	Sesamum indicum	NA	NA	NA	NA	NA
TR33707|c1_g1_i9	76	88	0.211504	0.785932	1.07494	No	PREDICTED: protein TRANSPARENT TESTA 12-like	Nicotiana tomentosiformis	NA	NA	NA	NA	NA
TR35639|c0_g2_i4	76	88	0.211504	0.785932	1.07476	No	hypothetical protein MIMGU_mgv1a013312mg	Mimulus guttatus	NA	NA	NA	NA	NA
TR42687|c0_g4_i1	76	88	0.211504	0.785932	1.07479	No	hypothetical protein B456_001G1123002, partial	Gossypium raimondii	NA	NA	NA	outer membrane[GO:0019867]	NA
TR43453|c2_g2_i5	76	88	0.211504	0.785932	1.07481	No	hypothetical protein VITISV_002570	Vitis vinifera	NA	regulation of transcription, DNA-templated[GO:0006355]	transcription factor activity, sequence-specific DNA binding[GO:0003700]	nucleus[GO:0005634]	NA
TR44336|c2_g4_i4	76	88	0.211504	0.785932	1.07484	No	NA	NA	NA	NA	NA	NA	NA
TR44581|c3_g3_i3	76	88	0.211504	0.785932	1.07486	No	PREDICTED: calcium-transporting ATPase 4, endoplasmic reticulum-type-like	Sesamum indicum	NA	NA	NA	NA	NA
TR40799|c0_g3_i2	88	76	-0.211504	0.785932	1.07489	No	PREDICTED: L-cysteine desulfhydrase	Sesamum indicum	NA	NA	NA	NA	NA
TR40803|c2_g1_i2	88	76	-0.211504	0.785932	1.07492	No	PREDICTED: BEL1-like homeodomain protein 7	Sesamum indicum	NA	NA	NA	NA	NA
TR43796|c1_g4_i2	88	76	-0.211504	0.785932	1.07474	No	PREDICTED: U-box domain-containing protein 13	Sesamum indicum	NA	NA	NA	NA	NA
TR31081|c0_g1_i1	386	434	0.169094	0.785903	1.07493	No	hypothetical protein MIMGU_mgv1a014641mg	Mimulus guttatus	NA	NA	NA	integral component of membrane[GO:0016021] ; Golgi membrane[GO:0000139]	NA
TR32118|c0_g1_i2	262	296	0.17603	0.785889	1.07493	No	hypothetical protein MIMGU_mgv1a008397mg	Mimulus guttatus	NA	primary metabolic process[GO:0044238] ; dephosphorylation[GO:0016311] ; cellular macromolecule metabolic process[GO:0044260]	phosphatase activity[GO:0016791]	NA	map00627:Aminobenzoate degradation(nitrophenyl phosphatase[ec:3.1.3.41])
TR35808|c0_g2_i1	262	296	0.17603	0.785889	1.07496	No	PREDICTED: zinc finger protein NUTCRACKER-like	Sesamum indicum	NA	NA	NA	NA	NA
TR41779|c0_g3_i4	262	296	0.17603	0.785889	1.07498	No	PREDICTED: WD repeat-containing protein WRAP73	Sesamum indicum	NA	NA	NA	NA	NA
TR44138|c2_g7_i5	262	296	0.17603	0.785889	1.07501	No	PREDICTED: putative E3 ubiquitin-protein ligase LIN	Sesamum indicum	NA	NA	NA	NA	NA
TR8135|c0_g1_i3	262	296	0.17603	0.785889	1.07503	No	PREDICTED: myb-like protein X isoform X1	Sesamum indicum	NA	NA	NA	NA	NA
TR41987|c0_g2_i1	276	244	-0.177787	0.785803	1.07494	No	PREDICTED: uncharacterized protein LOC105179152 isoform X1	Sesamum indicum	NA	NA	NA	NA	NA
TR43672|c2_g1_i1	758	676	-0.165175	0.78574	1.07488	No	PREDICTED: villin-2-like	Sesamum indicum	NA	NA	NA	NA	NA
TR44581|c3_g2_i2	490	550	0.16665	0.785731	1.07489	No	hypothetical protein MIMGU_mgv1a002405mg	Mimulus guttatus	NA	metabolic process[GO:0008152]	ATP binding[GO:0005524] ; hydrolase activity[GO:0016787]	integral component of membrane[GO:0016021]	NA
TR44449|c1_g1_i11	368	414	0.169925	0.785694	1.07487	No	NA	NA	NA	NA	NA	NA	NA
TR36874|c0_g2_i1	2560	2258	-0.181098	0.78569	1.07489	No	PREDICTED: coproporphyrinogen-III oxidase 1, chloroplastic	Sesamum indicum	NA	NA	NA	NA	NA
TR3149|c0_g1_i2	140	160	0.192645	0.785636	1.07484	No	O-methyltransferase	Mentha x piperita	NA	methylation[GO:0032259]	O-methyltransferase activity[GO:0008171] ; protein dimerization activity[GO:0046983]	NA	NA
TR37092|c4_g3_i2	140	160	0.192645	0.785636	1.07486	No	PREDICTED: tubulin beta-2 chain	Nelumbo nucifera	NA	NA	NA	NA	NA
TR39305|c0_g1_i2	140	160	0.192645	0.785636	1.07489	No	PREDICTED: putative phospholipid:diacylglycerol acyltransferase 2	Sesamum indicum	NA	NA	NA	NA	NA
TR44166|c1_g1_i5	140	160	0.192645	0.785636	1.07491	No	PREDICTED: probable protein phosphatase 2C 50 isoform X2	Erythranthe guttatus	NA	NA	NA	NA	NA
TR36420|c0_g1_i5	160	140	-0.192645	0.785636	1.07494	No	PREDICTED: uncharacterized protein LOC105169565	Sesamum indicum	NA	NA	NA	NA	NA
TR36663|c0_g6_i1	160	140	-0.192645	0.785636	1.07496	No	NA	NA	NA	NA	NA	NA	NA
TR41729|c0_g3_i1	160	140	-0.192645	0.785636	1.07499	No	PREDICTED: UTP--glucose-1-phosphate uridylyltransferase-like	Sesamum indicum	NA	NA	NA	NA	NA
TR33317|c0_g1_i2	868	774	-0.165361	0.785633	1.07501	No	NA	NA	NA	NA	NA	NA	NA
TR37080|c0_g1_i4	822	922	0.165628	0.785535	1.0749	No	PREDICTED: probable aldo-keto reductase 2 isoform X1	Sesamum indicum	NA	NA	NA	NA	NA
TR41708|c0_g1_i3	394	350	-0.170841	0.785488	1.07486	No	PREDICTED: uncharacterized protein LOC105157667 isoform X2	Sesamum indicum	NA	NA	NA	NA	NA
TR8303|c2_g2_i1	472	420	-0.168398	0.785447	1.07483	No	PREDICTED: uncharacterized protein LOC105178739	Sesamum indicum	NA	NA	NA	NA	NA
TR36023|c0_g3_i2	794	708	-0.16539	0.785447	1.07486	No	PREDICTED: uncharacterized protein LOC105178033	Sesamum indicum	NA	NA	NA	NA	NA
TR36039|c0_g1_i2	2646	3010	0.18595	0.785434	1.07486	No	PREDICTED: GDSL esterase/lipase At5g33370-like	Sesamum indicum	NA	NA	NA	NA	NA
TR38051|c0_g2_i3	208	236	0.182203	0.785404	1.07485	No	PREDICTED: peroxisome biogenesis factor 10	Sesamum indicum	NA	NA	NA	NA	NA
TR42700|c0_g3_i3	208	236	0.182203	0.785404	1.07487	No	PREDICTED: pentatricopeptide repeat-containing protein At3g53700, chloroplastic	Sesamum indicum	NA	NA	NA	NA	NA
TR37797|c0_g1_i1	236	208	-0.182203	0.785404	1.0749	No	PREDICTED: E3 ubiquitin-protein ligase RGLG2-like	Sesamum indicum	NA	NA	NA	NA	NA
TR38236|c0_g1_i3	236	208	-0.182203	0.785404	1.07492	No	PREDICTED: LOW QUALITY PROTEIN: phosphoinositide phosphatase SAC8	Sesamum indicum	NA	NA	NA	NA	NA
TR43379|c1_g1_i6	236	208	-0.182203	0.785404	1.07495	No	PREDICTED: chromosome transmission fidelity protein 18 homolog	Sesamum indicum	NA	NA	NA	NA	NA
TR35412|c0_g2_i1	682	608	-0.1657	0.785351	1.0749	No	NA	NA	NA	NA	NA	NA	NA
TR44453|c0_g2_i3	682	608	-0.1657	0.785351	1.07493	No	PREDICTED: protein SMG7-like	Sesamum indicum	NA	NA	NA	NA	NA
TR40883|c1_g4_i6	332	374	0.171855	0.785284	1.07486	No	hypothetical protein MIMGU_mgv1a008108mg	Mimulus guttatus	NA	NA	NA	NA	NA
TR28561|c0_g1_i1	568	506	-0.166754	0.785276	1.07487	No	PREDICTED: uncharacterized protein LOC105156091 isoform X1	Sesamum indicum	NA	NA	NA	NA	NA
TR42361|c1_g2_i3	510	454	-0.167805	0.785137	1.07471	No	hypothetical protein MIMGU_mgv1a005930mg	Mimulus guttatus	NA	NA	nucleic acid binding[GO:0003676]	NA	NA
TR38128|c0_g2_i2	624	700	0.165809	0.785111	1.0747	No	PREDICTED: cyclin-dependent kinase C-1	Sesamum indicum	NA	NA	NA	NA	NA
TR42006|c1_g5_i2	354	314	-0.172985	0.785079	1.0747	No	PREDICTED: leucine-rich repeat extensin-like protein 4	Sesamum indicum	NA	NA	NA	NA	NA
TR42697|c0_g3_i3	354	314	-0.172985	0.785079	1.07468	No	PREDICTED: adoMet-dependent rRNA methyltransferase spb1, partial	Sesamum indicum	NA	NA	NA	NA	NA
TR22925|c0_g2_i2	488	548	0.167295	0.78495	1.07455	No	BnaA02g30070D	Brassica napus	NA	NA	protein heterodimerization activity[GO:0046982] ; DNA binding[GO:0003677]	nucleosome[GO:0000786] ; nucleus[GO:0005634]	NA
TR32242|c0_g1_i9	190	216	0.185032	0.784906	1.07452	No	NA	NA	NA	NA	NA	NA	NA
TR39213|c0_g3_i3	190	216	0.185032	0.784906	1.07454	No	NA	NA	NA	NA	NA	NA	NA
TR41897|c0_g1_i5	216	190	-0.185032	0.784906	1.07457	No	PREDICTED: 1,4-alpha-glucan-branching enzyme 3, chloroplastic/amyloplastic	Sesamum indicum	NA	NA	NA	NA	NA
TR44427|c2_g1_i4	216	190	-0.185032	0.784906	1.07459	No	NA	NA	NA	NA	NA	NA	NA
TR31871|c0_g1_i1	296	334	0.174251	0.784873	1.0746	No	PREDICTED: DNA repair protein RAD16	Sesamum indicum	NA	NA	NA	NA	NA
TR43939|c2_g6_i2	334	296	-0.174251	0.784873	1.07457	No	PREDICTED: WPP domain-interacting protein 1	Sesamum indicum	NA	NA	NA	NA	NA
TR29561|c0_g1_i2	156	178	0.190331	0.7848	1.07468	No	PREDICTED: 50S ribosomal protein L18, chloroplastic	Sesamum indicum	NA	NA	NA	NA	NA
TR35821|c0_g1_i1	156	178	0.190331	0.7848	1.07455	No	hypothetical protein MIMGU_mgv1a005199mg	Mimulus guttatus	NA	transmembrane transport[GO:0055085]	transmembrane transporter activity[GO:0022857]	integral component of membrane[GO:0016021]	NA
TR4014|c1_g3_i3	156	178	0.190331	0.7848	1.07458	No	hypothetical protein MIMGU_mgv1a012577mg	Mimulus guttatus	NA	transport[GO:0006810]	transporter activity[GO:0005215]	integral component of membrane[GO:0016021]	NA
TR39702|c0_g1_i5	178	156	-0.190331	0.7848	1.0746	No	PREDICTED: protein WVD2-like 1 isoform X3	Sesamum indicum	NA	NA	NA	NA	NA
TR40279|c0_g4_i1	178	156	-0.190331	0.7848	1.07463	No	PREDICTED: shugoshin-1-like isoform X2	Sesamum indicum	NA	NA	NA	NA	NA
TR41193|c0_g4_i4	178	156	-0.190331	0.7848	1.07465	No	NA	NA	NA	NA	NA	NA	NA
TR42915|c1_g3_i1	178	156	-0.190331	0.7848	1.07453	No	PREDICTED: transmembrane 9 superfamily member 11	Sesamum indicum	NA	NA	NA	NA	NA
TR34412|c0_g1_i2	1602	1422	-0.171953	0.784754	1.07464	No	hypothetical protein MIMGU_mgv1a011174mg	Mimulus guttatus	NA	proteolysis[GO:0006508]	serine-type endopeptidase activity[GO:0004252]	NA	NA
TR7780|c0_g2_i1	1158	1302	0.169094	0.784704	1.0746	No	PREDICTED: proteasome subunit beta type-1	Sesamum indicum	NA	NA	NA	NA	NA
TR32149|c1_g2_i1	606	680	0.166217	0.784703	1.07462	No	hypothetical protein MIMGU_mgv1a015639mg	Mimulus guttatus	NA	translation[GO:0006412]	structural constituent of ribosome[GO:0003735]	ribosome[GO:0005840]	NA
TR35497|c0_g1_i1	314	278	-0.17568	0.784696	1.07463	No	PREDICTED: uncharacterized protein LOC105166703	Sesamum indicum	NA	NA	NA	NA	NA
TR37805|c0_g2_i1	412	366	-0.170801	0.784688	1.07465	No	PREDICTED: vacuolar protein sorting-associated protein 4-like	Sesamum indicum	NA	NA	NA	NA	NA
TR42067|c3_g3_i2	572	642	0.166558	0.784567	1.07451	No	NA	NA	NA	NA	NA	NA	NA
TR38291|c0_g1_i3	294	260	-0.177305	0.784537	1.07449	No	hypothetical protein MIMGU_mgv1a006947mg	Mimulus guttatus	NA	NA	NA	NA	NA
TR7780|c0_g2_i2	622	698	0.166312	0.784477	1.07444	No	PREDICTED: proteasome subunit beta type-1	Sesamum indicum	NA	NA	NA	NA	NA
TR32625|c3_g3_i1	348	392	0.171766	0.784435	1.0744	No	hypothetical protein PHAVU_011G185400g	Phaseolus vulgaris	NA	NA	NA	NA	NA
TR42974|c2_g4_i4	274	242	-0.179169	0.784361	1.07433	No	PREDICTED: uncharacterized protein LOC105163227	Sesamum indicum	NA	NA	NA	NA	NA
TR41865|c0_g1_i2	372	330	-0.172837	0.78418	1.0741	No	PREDICTED: probable inactive leucine-rich repeat receptor-like protein kinase At3g03770	Sesamum indicum	NA	NA	NA	NA	NA
TR39394|c3_g3_i4	224	254	0.18133	0.784114	1.07404	No	PREDICTED: protein odr-4 homolog	Sesamum indicum	NA	NA	NA	NA	NA
TR25272|c0_g4_i1	254	224	-0.18133	0.784114	1.07406	No	NA	NA	NA	NA	NA	NA	NA
TR43496|c0_g4_i1	254	224	-0.18133	0.784114	1.07409	No	PREDICTED: uncharacterized aarF domain-containing protein kinase At1g79600, chloroplastic	Sesamum indicum	NA	NA	NA	NA	NA
TR34943|c0_g1_i1	734	654	-0.166489	0.784109	1.07411	No	hypothetical protein MIMGU_mgv1a008968mg	Mimulus guttatus	NA	iron-sulfur cluster assembly[GO:0016226]	NA	CIA complex[GO:0097361]	NA
TR37933|c0_g1_i8	848	952	0.166897	0.784092	1.07411	No	NA	NA	NA	NA	NA	NA	NA
TR35262|c1_g1_i3	678	604	-0.166737	0.784052	1.07408	No	NA	NA	NA	NA	NA	NA	NA
TR33417|c0_g5_i4	172	196	0.188445	0.783998	1.07403	No	PREDICTED: pre-mRNA cleavage factor Im 25 kDa subunit 2-like	Sesamum indicum	NA	NA	NA	NA	NA
TR41800|c0_g5_i1	172	196	0.188445	0.783998	1.07406	No	PREDICTED: uncharacterized protein LOC105171305	Sesamum indicum	NA	NA	NA	NA	NA
TR37789|c0_g4_i3	196	172	-0.188445	0.783998	1.07408	No	PREDICTED: putative RNA-binding protein Luc7-like 1 isoform X2	Sesamum indicum	NA	NA	NA	NA	NA
TR40105|c0_g6_i1	196	172	-0.188445	0.783998	1.07411	No	hypothetical protein MIMGU_mgv1a024409mg	Mimulus guttatus	NA	tryptophan biosynthetic process[GO:0000162]	tryptophan synthase activity[GO:0004834]	NA	map00260:Glycine, serine and threonine metabolism(synthase[ec:4.2.1.20]) ; map01130:Biosynthesis of antibiotics(synthase[ec:4.2.1.20]) ; map00400:Phenylalanine, tyrosine and tryptophan biosynthesis(synthase[ec:4.2.1.20])
TR38980|c4_g2_i1	488	434	-0.169186	0.783974	1.0741	No	PREDICTED: pyruvate kinase, cytosolic isozyme-like isoform X2	Erythranthe guttatus	NA	NA	NA	NA	NA
TR8282|c0_g5_i2	382	430	0.170764	0.783967	1.07412	No	hypothetical protein MIMGU_mgv1a000399mg	Mimulus guttatus	NA	NA	NA	NA	NA
TR43341|c0_g1_i1	1144	1018	-0.168349	0.783906	1.07406	No	PREDICTED: far upstream element-binding protein 2 isoform X2	Sesamum indicum	NA	NA	NA	NA	NA
TR33803|c2_g3_i2	602	536	-0.16753	0.783777	1.0739	No	PREDICTED: 14-3-3-like protein 16R	Sesamum indicum	NA	NA	NA	NA	NA
TR42353|c0_g5_i1	206	234	0.183864	0.783717	1.07385	No	PREDICTED: myb-like protein X	Sesamum indicum	NA	NA	NA	NA	NA
TR42981|c0_g1_i1	206	234	0.183864	0.783717	1.07387	No	PREDICTED: protein root UVB sensitive 1, chloroplastic	Sesamum indicum	NA	NA	NA	NA	NA
TR32510|c3_g1_i3	234	206	-0.183864	0.783717	1.0739	No	PREDICTED: protein diaphanous homolog 1-like	Sesamum indicum	NA	NA	NA	NA	NA
TR39176|c0_g1_i6	234	206	-0.183864	0.783717	1.07392	No	PREDICTED: G2/mitotic-specific cyclin-2-like	Sesamum indicum	NA	NA	NA	NA	NA
TR42436|c0_g4_i2	1546	1372	-0.17226	0.783682	1.0739	No	PREDICTED: calreticulin isoform X2	Nicotiana sylvestris	NA	NA	NA	NA	NA
TR39185|c0_g1_i6	364	410	0.171685	0.783672	1.07391	No	PREDICTED: protein LOW PSII ACCUMULATION 1, chloroplastic	Sesamum indicum	NA	NA	NA	NA	NA
TR23786|c1_g1_i1	106	122	0.202817	0.783658	1.07417	No	hypothetical protein POPTR_0010s19000g	Populus trichocarpa	NA	cellular transition metal ion homeostasis[GO:0046916] ; metal ion transport[GO:0030001]	transition metal ion binding[GO:0046914]	cytoplasm[GO:0005737]	NA
TR23792|c0_g1_i1	106	122	0.202817	0.783658	1.07392	No	hypothetical protein MIMGU_mgv1a004697mg	Mimulus guttatus	NA	regulation of protein phosphatase type 2A activity[GO:0034047]	protein phosphatase type 2A regulator activity[GO:0008601]	protein phosphatase type 2A complex[GO:0000159]	NA
TR27607|c0_g1_i2	106	122	0.202817	0.783658	1.07397	No	PREDICTED: probable methyltransferase PMT26	Sesamum indicum	NA	NA	NA	NA	NA
TR2782|c0_g6_i1	106	122	0.202817	0.783658	1.07399	No	NA	NA	NA	NA	NA	NA	NA
TR39728|c0_g1_i1	106	122	0.202817	0.783658	1.07402	No	hypothetical protein MIMGU_mgv1a007914mg	Mimulus guttatus	NA	sialylation[GO:0097503] ; protein glycosylation[GO:0006486]	sialyltransferase activity[GO:0008373]	Golgi apparatus[GO:0005794] ; integral component of membrane[GO:0016021]	NA
TR43126|c2_g3_i1	106	122	0.202817	0.783658	1.07404	No	PREDICTED: LRR receptor-like serine/threonine-protein kinase GSO2 isoform X2	Sesamum indicum	NA	NA	NA	NA	NA
TR44150|c0_g4_i2	106	122	0.202817	0.783658	1.07407	No	PREDICTED: uncharacterized protein LOC105180220	Sesamum indicum	NA	NA	NA	NA	NA
TR7797|c0_g1_i4	106	122	0.202817	0.783658	1.07409	No	NA	NA	NA	NA	NA	NA	NA
TR34075|c2_g5_i1	122	106	-0.202817	0.783658	1.07412	No	PREDICTED: ribosome production factor 1	Sesamum indicum	NA	NA	NA	NA	NA
TR36725|c0_g4_i8	122	106	-0.202817	0.783658	1.07414	No	hypothetical protein JCGZ_01873	Jatropha curcas	NA	transmembrane transport[GO:0055085]	NA	integral component of membrane[GO:0016021]	NA
TR44315|c0_g4_i4	122	106	-0.202817	0.783658	1.07394	No	PREDICTED: B3 domain-containing transcription repressor VAL2	Sesamum indicum	NA	NA	NA	NA	NA
TR38488|c1_g1_i1	294	332	0.175367	0.78365	1.07418	No	PREDICTED: putative nuclease HARBI1	Sesamum indicum	NA	NA	NA	NA	NA
TR44424|c0_g3_i2	294	332	0.175367	0.78365	1.07421	No	PREDICTED: FIP1[V]-like protein isoform X1	Sesamum indicum	NA	NA	NA	NA	NA
TR32874|c0_g1_i6	1480	1314	-0.171632	0.78365	1.07423	No	PREDICTED: profilin-3-like	Sesamum indicum	NA	NA	NA	NA	NA
TR31058|c1_g2_i7	122	140	0.198546	0.783574	1.07416	No	NA	NA	NA	NA	NA	NA	NA
TR34142|c0_g12_i1	122	140	0.198546	0.783574	1.07418	No	PREDICTED: major allergen Pru ar 1-like	Sesamum indicum	NA	NA	NA	NA	NA
TR37139|c0_g2_i4	122	140	0.198546	0.783574	1.07421	No	PREDICTED: plastidial pyruvate kinase 2-like	Sesamum indicum	NA	NA	NA	NA	NA
TR2496|c0_g1_i4	140	122	-0.198546	0.783574	1.07423	No	hypothetical protein MIMGU_mgv1a020951mg	Mimulus guttatus	NA	NA	NA	NA	NA
TR3269|c0_g3_i2	140	122	-0.198546	0.783574	1.07426	No	PREDICTED: transmembrane protein 18	Sesamum indicum	NA	NA	NA	NA	NA
TR33881|c0_g2_i1	140	122	-0.198546	0.783574	1.07441	No	PREDICTED: succinyl-CoA ligase [ADP-forming] subunit beta, mitochondrial	Sesamum indicum	NA	NA	NA	NA	NA
TR38933|c0_g1_i7	140	122	-0.198546	0.783574	1.07431	No	mitogen activated protein kinase kinase 1	Origanum onites	Lamiaceae	protein phosphorylation[GO:0006468]	protein kinase activity[GO:0004672] ; ATP binding[GO:0005524]	NA	NA
TR39016|c0_g1_i4	140	122	-0.198546	0.783574	1.07433	No	argonaute 6	Salvia miltiorrhiza	NA	NA	nucleic acid binding[GO:0003676]	NA	NA
TR41123|c0_g3_i3	140	122	-0.198546	0.783574	1.07436	No	hypothetical protein MIMGU_mgv1a003001mg	Mimulus guttatus	NA	attachment of GPI anchor to protein[GO:0016255]	NA	GPI-anchor transamidase complex[GO:0042765]	NA
TR43588|c0_g1_i1	140	122	-0.198546	0.783574	1.07438	No	PREDICTED: trihelix transcription factor GT-2-like isoform X1	Sesamum indicum	NA	NA	NA	NA	NA
TR8007|c0_g1_i1	140	122	-0.198546	0.783574	1.07428	No	cytochrome P450 CYP716A89	Salvia miltiorrhiza	NA	oxidation-reduction process[GO:0055114]	heme binding[GO:0020037] ; oxidoreductase activity, acting on paired donors, with incorporation or reduction of molecular oxygen[GO:0016705] ; monooxygenase activity[GO:0004497] ; iron ion binding[GO:0005506]	integral component of membrane[GO:0016021]	NA
TR40487|c0_g1_i2	914	814	-0.167165	0.783531	1.07437	No	PREDICTED: proline--tRNA ligase	Sesamum indicum	NA	NA	NA	NA	NA
TR36867|c0_g2_i2	878	782	-0.167052	0.78351	1.07437	No	PREDICTED: chloroplast stem-loop binding protein of 41 kDa a, chloroplastic	Sesamum indicum	NA	NA	NA	NA	NA
TR40765|c0_g1_i1	2552	2248	-0.182986	0.783388	1.07423	No	PREDICTED: trifunctional UDP-glucose 4,6-dehydratase/UDP-4-keto-6-deoxy-D-glucose 3,5-epimerase/UDP-4-keto-L-rhamnose-reductase RHM1	Sesamum indicum	NA	NA	NA	NA	NA
TR40506|c3_g1_i10	390	346	-0.172702	0.783372	1.07423	No	PREDICTED: uncharacterized protein LOC105168474	Sesamum indicum	NA	NA	NA	NA	NA
TR27936|c1_g1_i2	60	70	0.222392	0.783234	1.07437	No	hypothetical protein MIMGU_mgv1a007716mg	Mimulus guttatus	NA	transmembrane transport[GO:0055085]	transmembrane transporter activity[GO:0022857]	integral component of membrane[GO:0016021]	NA
TR29045|c0_g1_i1	60	70	0.222392	0.783234	1.07472	No	PREDICTED: uncharacterized protein LOC105161106	Sesamum indicum	NA	NA	NA	NA	NA
TR30171|c0_g7_i1	60	70	0.222392	0.783234	1.07412	No	Aux/IAA protein	Vitis vinifera	NA	cellular process[GO:0009987] ; regulation of cellular process[GO:0050794]	NA	NA	NA
TR31058|c1_g2_i4	60	70	0.222392	0.783234	1.07414	No	NA	NA	NA	NA	NA	NA	NA
TR31857|c0_g1_i1	60	70	0.222392	0.783234	1.07417	No	hypothetical protein MIMGU_mgv1a004127mg	Mimulus guttatus	NA	NA	NA	NA	NA
TR35183|c0_g1_i2	60	70	0.222392	0.783234	1.07419	No	NA	NA	NA	NA	NA	NA	NA
TR36876|c0_g1_i1	60	70	0.222392	0.783234	1.07422	No	PREDICTED: squamosa promoter-binding-like protein 12	Sesamum indicum	NA	NA	NA	NA	NA
TR38011|c2_g2_i2	60	70	0.222392	0.783234	1.07424	No	hypothetical protein M569_10874, partial	Genlisea aurea	NA	translation[GO:0006412]	structural constituent of ribosome[GO:0003735]	NA	NA
TR38195|c0_g4_i1	60	70	0.222392	0.783234	1.07427	No	PREDICTED: polynucleotide 5'-hydroxyl-kinase NOL9	Sesamum indicum	NA	NA	NA	NA	NA
TR39892|c0_g1_i1	60	70	0.222392	0.783234	1.07429	No	PREDICTED: dolichol kinase	Sesamum indicum	NA	NA	NA	NA	NA
TR39941|c0_g1_i1	60	70	0.222392	0.783234	1.07432	No	PREDICTED: chromo domain protein LHP1 isoform X5	Sesamum indicum	NA	NA	NA	NA	NA
TR44790|c2_g2_i1	60	70	0.222392	0.783234	1.07434	No	PREDICTED: protein CHROMATIN REMODELING 20 isoform X1	Sesamum indicum	NA	NA	NA	NA	NA
TR23015|c0_g1_i2	70	60	-0.222392	0.783234	1.07407	No	PREDICTED: protein ECERIFERUM 3-like	Sesamum indicum	NA	NA	NA	NA	NA
TR25364|c0_g1_i1	70	60	-0.222392	0.783234	1.0744	No	hypothetical protein MIMGU_mgv1a000266mg	Mimulus guttatus	NA	NA	NA	integral component of membrane[GO:0016021]	NA
TR35153|c1_g3_i3	70	60	-0.222392	0.783234	1.07409	No	PREDICTED: serine/threonine protein phosphatase 2A 57 kDa regulatory subunit B' iota isoform	Sesamum indicum	NA	NA	NA	NA	NA
TR35638|c0_g2_i1	70	60	-0.222392	0.783234	1.07445	No	hypothetical protein B456_005G199600	Gossypium raimondii	NA	mRNA cis splicing, via spliceosome[GO:0045292]	RNA cap binding[GO:0000339] ; nucleotide binding[GO:0000166]	nuclear cap binding complex[GO:0005846]	NA
TR36721|c0_g1_i5	70	60	-0.222392	0.783234	1.07447	No	PREDICTED: threonylcarbamoyladenosine tRNA methylthiotransferase	Sesamum indicum	NA	NA	NA	NA	NA
TR37060|c0_g2_i3	70	60	-0.222392	0.783234	1.0745	No	PREDICTED: B-box zinc finger protein 22	Sesamum indicum	NA	NA	NA	NA	NA
TR37562|c0_g2_i8	70	60	-0.222392	0.783234	1.07452	No	NA	NA	NA	NA	NA	NA	NA
TR38183|c0_g3_i1	70	60	-0.222392	0.783234	1.07455	No	NA	NA	NA	NA	NA	NA	NA
TR3876|c0_g3_i1	70	60	-0.222392	0.783234	1.07457	No	hypothetical protein MIMGU_mgv1a006734mg	Mimulus guttatus	NA	calcium ion transmembrane transport[GO:0070588]	calcium:proton antiporter activity[GO:0015369]	integral component of membrane[GO:0016021]	NA
TR39567|c0_g1_i2	70	60	-0.222392	0.783234	1.0746	No	PREDICTED: receptor protein kinase CLAVATA1-like	Sesamum indicum	NA	NA	NA	NA	NA
TR39822|c0_g3_i4	70	60	-0.222392	0.783234	1.07462	No	kinase, putative	Ricinus communis	NA	peptidyl-tyrosine phosphorylation[GO:0018108]	non-membrane spanning protein tyrosine kinase activity[GO:0004715] ; ATP binding[GO:0005524] ; protein serine/threonine kinase activity[GO:0004674]	integral component of membrane[GO:0016021]	map04660:T cell receptor signaling pathway(protein-tyrosine kinase[ec:2.7.10.2])
TR42564|c0_g1_i4	70	60	-0.222392	0.783234	1.07465	No	NA	NA	NA	NA	NA	NA	NA
TR42930|c0_g1_i6	70	60	-0.222392	0.783234	1.07467	No	PREDICTED: auxin response factor 1-like	Sesamum indicum	NA	NA	NA	NA	NA
TR43058|c1_g2_i2	70	60	-0.222392	0.783234	1.0747	No	PREDICTED: peptidyl-prolyl cis-trans isomerase FKBP43-like isoform X1	Sesamum indicum	NA	NA	NA	NA	NA
TR44259|c2_g3_i3	70	60	-0.222392	0.783234	1.07442	No	PREDICTED: villin-4-like, partial	Pyrus x bretschneideri	NA	NA	NA	NA	NA
TR148|c0_g1_i1	34	40	0.234465	0.783201	1.0747	No	NA	NA	NA	NA	NA	NA	NA
TR18037|c0_g1_i2	34	40	0.234465	0.783201	1.07665	No	SPFH/Band 7/PHB domain-containing membrane-associated protein family isoform 2	Theobroma cacao	NA	NA	protein histidine kinase binding[GO:0043424]	vacuolar membrane[GO:0005774] ; plasmodesma[GO:0009506] ; Golgi apparatus[GO:0005794]	NA
TR24671|c0_g3_i2	34	40	0.234465	0.783201	1.07475	No	PREDICTED: nicalin-1-like	Sesamum indicum	NA	NA	NA	NA	NA
TR2470|c1_g4_i1	34	40	0.234465	0.783201	1.07478	No	PREDICTED: calcium-dependent protein kinase-like	Sesamum indicum	NA	NA	NA	NA	NA
TR29212|c0_g1_i1	34	40	0.234465	0.783201	1.0748	No	NA	NA	NA	NA	NA	NA	NA
TR3069|c0_g2_i2	34	40	0.234465	0.783201	1.07483	No	PREDICTED: probable receptor-like protein kinase At1g80640 isoform X1	Sesamum indicum	NA	NA	NA	NA	NA
TR30788|c4_g1_i3	34	40	0.234465	0.783201	1.07486	No	NA	NA	NA	NA	NA	NA	NA
TR31655|c1_g2_i1	34	40	0.234465	0.783201	1.07488	No	NA	NA	NA	NA	NA	NA	NA
TR31706|c0_g1_i6	34	40	0.234465	0.783201	1.07491	No	PREDICTED: uncharacterized protein LOC105174698 isoform X2	Sesamum indicum	NA	NA	NA	NA	NA
TR32359|c0_g1_i9	34	40	0.234465	0.783201	1.07493	No	PREDICTED: uncharacterized protein LOC105173304	Sesamum indicum	NA	NA	NA	NA	NA
TR32519|c2_g4_i3	34	40	0.234465	0.783201	1.07496	No	hypothetical protein MIMGU_mgv1a012785mg	Mimulus guttatus	NA	NA	NA	NA	NA
TR32795|c1_g1_i4	34	40	0.234465	0.783201	1.07498	No	hypothetical protein MIMGU_mgv1a014572mg	Mimulus guttatus	NA	NA	NA	NA	NA
TR33121|c0_g2_i2	34	40	0.234465	0.783201	1.07501	No	NA	NA	NA	NA	NA	NA	NA
TR34094|c3_g1_i1	34	40	0.234465	0.783201	1.07503	No	NA	NA	NA	NA	NA	NA	NA
TR34752|c0_g1_i1	34	40	0.234465	0.783201	1.07506	No	NA	NA	NA	NA	NA	NA	NA
TR35463|c0_g3_i2	34	40	0.234465	0.783201	1.07508	No	basic helix-loop-helix transcription factor	Salvia miltiorrhiza	NA	NA	NA	NA	NA
TR35761|c0_g2_i1	34	40	0.234465	0.783201	1.07511	No	PREDICTED: GATA transcription factor 11-like isoform X2	Sesamum indicum	NA	NA	NA	NA	NA
TR35957|c1_g9_i1	34	40	0.234465	0.783201	1.07513	No	NA	NA	NA	NA	NA	NA	NA
TR35989|c0_g2_i6	34	40	0.234465	0.783201	1.07516	No	cellulose synthase	Populus ussuriensis	NA	cellulose biosynthetic process[GO:0030244]	cellulose synthase (UDP-forming) activity[GO:0016760]	integral component of membrane[GO:0016021]	map00500:Starch and sucrose metabolism(synthase (UDP-forming)[ec:2.4.1.12])
TR36396|c0_g5_i3	34	40	0.234465	0.783201	1.07518	No	PREDICTED: uncharacterized protein LOC105171057	Sesamum indicum	NA	NA	NA	NA	NA
TR37609|c0_g1_i3	34	40	0.234465	0.783201	1.07521	No	unnamed protein product	Coffea canephora	NA	nucleocytoplasmic transport[GO:0006913] ; intracellular protein transport[GO:0006886] ; metabolic process[GO:0008152] ; small GTPase mediated signal transduction[GO:0007264]	GTP binding[GO:0005525] ; GTPase activity[GO:0003924]	intracellular[GO:0005622] ; membrane[GO:0016020]	NA
TR38345|c0_g5_i2	34	40	0.234465	0.783201	1.07523	No	YA3	Antirrhinum majus	NA	regulation of transcription, DNA-templated[GO:0006355]	transcription factor activity, sequence-specific DNA binding[GO:0003700] ; DNA binding[GO:0003677]	CCAAT-binding factor complex[GO:0016602]	NA
TR3853|c1_g3_i3	34	40	0.234465	0.783201	1.07526	No	PREDICTED: zinc finger protein WIP2	Sesamum indicum	NA	NA	NA	NA	NA
TR38853|c1_g1_i1	34	40	0.234465	0.783201	1.07528	No	hypothetical protein MIMGU_mgv1a005080mg	Mimulus guttatus	NA	carbohydrate phosphorylation[GO:0046835] ; galactose metabolic process[GO:0006012]	ATP binding[GO:0005524] ; galactokinase activity[GO:0004335]	cytoplasm[GO:0005737]	map00052:Galactose metabolism(galactokinase (phosphorylating)[ec:2.7.1.6]) ; map00520:Amino sugar and nucleotide sugar metabolism(galactokinase (phosphorylating)[ec:2.7.1.6])
TR38921|c2_g3_i1	34	40	0.234465	0.783201	1.07531	No	NA	NA	NA	NA	NA	NA	NA
TR3910|c0_g1_i3	34	40	0.234465	0.783201	1.07534	No	hypothetical protein POPTR_0001s20480g	Populus trichocarpa	NA	translational initiation[GO:0006413] ; RNA secondary structure unwinding[GO:0010501] ; regulation of gene expression[GO:0010468]	translation initiation factor activity[GO:0003743] ; ATP-dependent RNA helicase activity[GO:0004004] ; ATP binding[GO:0005524]	NA	NA
TR39198|c0_g1_i6	34	40	0.234465	0.783201	1.07536	No	PREDICTED: uncharacterized protein LOC105172267 isoform X1	Sesamum indicum	NA	NA	NA	NA	NA
TR39320|c0_g1_i4	34	40	0.234465	0.783201	1.07539	No	PREDICTED: elongator complex protein 6 isoform X2	Sesamum indicum	NA	NA	NA	NA	NA
TR40450|c0_g7_i2	34	40	0.234465	0.783201	1.07541	No	transporter-related family protein	Populus trichocarpa	NA	nucleotide-sugar transport[GO:0015780] ; nucleotide transmembrane transport[GO:1901679]	nucleotide-sugar transmembrane transporter activity[GO:0005338]	integral component of membrane[GO:0016021]	NA
TR40575|c0_g2_i1	34	40	0.234465	0.783201	1.07544	No	PREDICTED: protein downstream neighbor of Son	Sesamum indicum	NA	NA	NA	NA	NA
TR40905|c0_g1_i5	34	40	0.234465	0.783201	1.07546	No	PREDICTED: ABC transporter G family member 8-like	Sesamum indicum	NA	NA	NA	NA	NA
TR40937|c0_g2_i1	34	40	0.234465	0.783201	1.07549	No	PREDICTED: allantoate deiminase	Sesamum indicum	NA	NA	NA	NA	NA
TR41061|c0_g4_i1	34	40	0.234465	0.783201	1.07551	No	NA	NA	NA	NA	NA	NA	NA
TR41176|c1_g5_i1	34	40	0.234465	0.783201	1.07554	No	PREDICTED: F-box protein At4g18380-like	Sesamum indicum	NA	NA	NA	NA	NA
TR42444|c0_g5_i1	34	40	0.234465	0.783201	1.07556	No	hypothetical protein MIMGU_mgv1a004173mg	Mimulus guttatus	NA	NA	protein kinase activity[GO:0004672] ; nucleotide binding[GO:0000166]	NA	NA
TR43196|c1_g3_i5	34	40	0.234465	0.783201	1.07559	No	PREDICTED: uncharacterized protein LOC105161315	Sesamum indicum	NA	NA	NA	NA	NA
TR43345|c0_g4_i1	34	40	0.234465	0.783201	1.07561	No	hypothetical protein CISIN_1g025930mg	Citrus sinensis	NA	NA	NA	NA	NA
TR43482|c4_g3_i3	34	40	0.234465	0.783201	1.07564	No	hypothetical protein MIMGU_mgv1a004998mg	Mimulus guttatus	NA	phytochelatin biosynthetic process[GO:0046938] ; response to metal ion[GO:0010038]	metal ion binding[GO:0046872] ; glutathione gamma-glutamylcysteinyltransferase activity[GO:0016756]	NA	NA
TR43694|c0_g7_i1	34	40	0.234465	0.783201	1.07566	No	PREDICTED: probable methyltransferase PMT7	Sesamum indicum	NA	NA	NA	NA	NA
TR44131|c3_g1_i5	34	40	0.234465	0.783201	1.07569	No	NA	NA	NA	NA	NA	NA	NA
TR44217|c0_g8_i1	34	40	0.234465	0.783201	1.07571	No	PREDICTED: uncharacterized protein LOC105958287 isoform X2	Erythranthe guttatus	NA	NA	NA	NA	NA
TR44370|c0_g5_i2	34	40	0.234465	0.783201	1.07574	No	hypothetical protein MIMGU_mgv1a000571mg	Mimulus guttatus	NA	transcription, DNA-templated[GO:0006351] ; cell cycle[GO:0007049]	DNA binding[GO:0003677]	transcriptional repressor complex[GO:0017053]	NA
TR7945|c0_g5_i3	34	40	0.234465	0.783201	1.07577	No	PREDICTED: putative methyltransferase C9orf114 homolog isoform X2	Sesamum indicum	NA	NA	NA	NA	NA
TR1447|c0_g1_i1	40	34	-0.234465	0.783201	1.07579	No	unnamed protein product	Vitis vinifera	NA	NA	NA	NA	NA
TR19122|c0_g1_i1	40	34	-0.234465	0.783201	1.07582	No	PREDICTED: uncharacterized protein LOC100254265	Vitis vinifera	NA	Wnt signaling pathway[GO:0016055] ; peptidyl-serine phosphorylation[GO:0018105]	ATP binding[GO:0005524] ; protein serine/threonine kinase activity[GO:0004674]	NA	NA
TR21323|c0_g1_i2	40	34	-0.234465	0.783201	1.07584	No	PREDICTED: protein YLS9-like	Sesamum indicum	NA	NA	NA	NA	NA
TR2158|c0_g1_i4	40	34	-0.234465	0.783201	1.07587	No	NA	NA	NA	NA	NA	NA	NA
TR2425|c0_g2_i5	40	34	-0.234465	0.783201	1.07589	No	NA	NA	NA	NA	NA	NA	NA
TR27316|c0_g1_i2	40	34	-0.234465	0.783201	1.07592	No	NA	NA	NA	NA	NA	NA	NA
TR27693|c0_g2_i1	40	34	-0.234465	0.783201	1.07594	No	PREDICTED: protein LONGIFOLIA 1	Sesamum indicum	NA	NA	NA	NA	NA
TR32362|c1_g1_i1	40	34	-0.234465	0.783201	1.07597	No	PREDICTED: dnaJ protein homolog	Sesamum indicum	NA	NA	NA	NA	NA
TR3295|c1_g3_i1	40	34	-0.234465	0.783201	1.07599	No	PREDICTED: 60S ribosome subunit biogenesis protein NIP7 homolog	Sesamum indicum	NA	NA	NA	NA	NA
TR34665|c1_g1_i1	40	34	-0.234465	0.783201	1.07602	No	hypothetical protein MIMGU_mgv1a012944mg	Mimulus guttatus	NA	ER to Golgi vesicle-mediated transport[GO:0006888] ; protein transport[GO:0015031]	NA	Golgi membrane[GO:0000139] ; integral component of membrane[GO:0016021] ; cis-Golgi network[GO:0005801]	NA
TR3581|c0_g1_i1	40	34	-0.234465	0.783201	1.07604	No	hypothetical protein MIMGU_mgv1a008110mg	Mimulus guttatus	NA	NA	NA	NA	NA
TR35960|c0_g1_i8	40	34	-0.234465	0.783201	1.07607	No	transcription factor NFYB	Salvia miltiorrhiza	NA	NA	NA	NA	NA
TR3601|c0_g2_i2	40	34	-0.234465	0.783201	1.07609	No	PREDICTED: dynamin-related protein 1E	Sesamum indicum	NA	NA	NA	NA	NA
TR36312|c0_g3_i1	40	34	-0.234465	0.783201	1.07612	No	hypothetical protein MIMGU_mgv1a003441mg	Mimulus guttatus	NA	MAPK cascade[GO:0000165]	MAP kinase activity[GO:0004707] ; ATP binding[GO:0005524]	intracellular[GO:0005622]	map04150:mTOR signaling pathway(protein kinase[ec:2.7.11.24])
TR36497|c0_g1_i1	40	34	-0.234465	0.783201	1.07615	No	PREDICTED: 5-formyltetrahydrofolate cyclo-ligase-like protein COG0212	Nelumbo nucifera	NA	NA	NA	NA	NA
TR37304|c0_g4_i2	40	34	-0.234465	0.783201	1.07617	No	NA	NA	NA	NA	NA	NA	NA
TR38993|c0_g2_i5	40	34	-0.234465	0.783201	1.0762	No	NA	NA	NA	NA	NA	NA	NA
TR39533|c0_g2_i1	40	34	-0.234465	0.783201	1.07622	No	hypothetical protein MIMGU_mgv1a0034531mg, partial	Mimulus guttatus	NA	NA	NA	NA	NA
TR39853|c0_g2_i4	40	34	-0.234465	0.783201	1.07625	No	NA	NA	NA	NA	NA	NA	NA
TR3986|c0_g3_i4	40	34	-0.234465	0.783201	1.07627	No	hypothetical protein MIMGU_mgv1a0091942mg, partial	Mimulus guttatus	NA	metabolic process[GO:0008152]	NA	NA	NA
TR40317|c1_g2_i11	40	34	-0.234465	0.783201	1.0763	No	PREDICTED: uncharacterized protein LOC105174676	Sesamum indicum	NA	NA	NA	NA	NA
TR40762|c2_g3_i9	40	34	-0.234465	0.783201	1.07632	No	NA	NA	NA	NA	NA	NA	NA
TR41352|c0_g1_i3	40	34	-0.234465	0.783201	1.07635	No	NA	NA	NA	NA	NA	NA	NA
TR41447|c3_g4_i1	40	34	-0.234465	0.783201	1.07637	No	hypothetical protein MIMGU_mgv1a008790mg	Mimulus guttatus	NA	NA	zinc ion binding[GO:0008270]	NA	NA
TR41498|c0_g3_i2	40	34	-0.234465	0.783201	1.0764	No	PREDICTED: choline/ethanolaminephosphotransferase 1	Sesamum indicum	NA	NA	NA	NA	NA
TR41664|c1_g6_i1	40	34	-0.234465	0.783201	1.07473	No	PREDICTED: glucose-6-phosphate 1-dehydrogenase, cytoplasmic isoform-like	Sesamum indicum	NA	NA	NA	NA	NA
TR41688|c0_g1_i1	40	34	-0.234465	0.783201	1.07645	No	hypothetical protein CISIN_1g021594mg	Citrus sinensis	NA	NA	NA	integral component of membrane[GO:0016021]	NA
TR41886|c0_g1_i5	40	34	-0.234465	0.783201	1.07647	No	PREDICTED: probable ubiquitin-conjugating enzyme E2 25	Sesamum indicum	NA	NA	NA	NA	NA
TR43158|c0_g1_i2	40	34	-0.234465	0.783201	1.0765	No	PREDICTED: RNA-dependent RNA polymerase 2	Sesamum indicum	NA	NA	NA	NA	NA
TR43431|c0_g1_i10	40	34	-0.234465	0.783201	1.07653	No	PREDICTED: LOW QUALITY PROTEIN: tyrosyl-DNA phosphodiesterase 1	Sesamum indicum	NA	NA	NA	NA	NA
TR43461|c0_g1_i5	40	34	-0.234465	0.783201	1.07655	No	hypothetical protein MIMGU_mgv1a008238mg	Mimulus guttatus	NA	NA	NA	NA	NA
TR43780|c0_g3_i2	40	34	-0.234465	0.783201	1.07658	No	AT2G31890-like protein, partial	California macrophylla	NA	NA	NA	NA	NA
TR43819|c4_g3_i2	40	34	-0.234465	0.783201	1.0766	No	PREDICTED: probable serine/threonine-protein kinase Cx32, chloroplastic isoform X2	Sesamum indicum	NA	NA	NA	NA	NA
TR44683|c2_g8_i2	40	34	-0.234465	0.783201	1.07663	No	NA	NA	NA	NA	NA	NA	NA
TR8183|c0_g2_i1	40	34	-0.234465	0.783201	1.07642	No	unnamed protein product	Vitis vinifera	NA	NA	NA	NA	NA
TR40083|c0_g1_i1	694	618	-0.167329	0.783199	1.07668	No	PREDICTED: BTB/POZ domain-containing protein At2g13690	Sesamum indicum	NA	NA	NA	NA	NA
TR40855|c1_g2_i2	1260	1120	-0.169925	0.783182	1.07668	No	PREDICTED: phosphoenolpyruvate carboxykinase [ATP]-like	Sesamum indicum	NA	NA	NA	NA	NA
TR39618|c0_g2_i2	258	292	0.178597	0.783169	1.07668	No	hypothetical protein MIMGU_mgv1a001800mg	Mimulus guttatus	NA	metabolic process[GO:0008152]	catalytic activity[GO:0003824]	NA	NA
TR32520|c0_g1_i1	292	258	-0.178597	0.783169	1.07671	No	cytochrome P450	Nepeta racemosa	Lamiaceae	oxidation-reduction process[GO:0055114]	heme binding[GO:0020037] ; oxidoreductase activity, acting on paired donors, with incorporation or reduction of molecular oxygen[GO:0016705] ; monooxygenase activity[GO:0004497] ; iron ion binding[GO:0005506]	NA	NA
TR2256|c3_g1_i7	138	158	0.195256	0.783108	1.07675	No	PREDICTED: membrane steroid-binding protein 1-like	Sesamum indicum	NA	NA	NA	NA	NA
TR33120|c2_g1_i3	138	158	0.195256	0.783108	1.07668	No	PREDICTED: shaggy-related protein kinase alpha	Sesamum indicum	NA	NA	NA	NA	NA
TR35037|c0_g1_i3	138	158	0.195256	0.783108	1.0767	No	NA	NA	NA	NA	NA	NA	NA
TR39699|c0_g3_i1	138	158	0.195256	0.783108	1.07673	No	PREDICTED: farnesylcysteine lyase	Sesamum indicum	NA	NA	NA	NA	NA
TR39719|c0_g1_i3	138	158	0.195256	0.783108	1.07665	No	PREDICTED: flowering time control protein FCA	Sesamum indicum	NA	NA	NA	NA	NA
TR34725|c0_g2_i1	158	138	-0.195256	0.783108	1.07678	No	hypothetical protein MIMGU_mgv1a027027mg	Mimulus guttatus	NA	regulation of transcription, DNA-templated[GO:0006355]	sequence-specific DNA binding[GO:0043565] ; transcription factor activity, sequence-specific DNA binding[GO:0003700]	nucleus[GO:0005634]	NA
TR38177|c0_g9_i1	158	138	-0.195256	0.783108	1.0768	No	PREDICTED: uncharacterized protein LOC105162455	Sesamum indicum	NA	NA	NA	NA	NA
TR41252|c0_g1_i5	158	138	-0.195256	0.783108	1.07685	No	PREDICTED: uncharacterized protein LOC105156965	Sesamum indicum	NA	NA	NA	NA	NA
TR41612|c0_g3_i8	158	138	-0.195256	0.783108	1.07683	No	PREDICTED: zinc finger CCHC domain-containing protein 8	Sesamum indicum	NA	NA	NA	NA	NA
TR8121|c0_g1_i9	328	370	0.173829	0.783064	1.07682	No	PREDICTED: ABC transporter B family member 26, chloroplastic isoform X1	Sesamum indicum	NA	NA	NA	NA	NA
TR39399|c0_g3_i2	214	188	-0.186878	0.783049	1.07682	No	PREDICTED: deoxynucleoside triphosphate triphosphohydrolase SAMHD1 homolog	Sesamum indicum	NA	NA	NA	NA	NA
TR33480|c0_g3_i1	812	912	0.167554	0.783024	1.07682	No	PREDICTED: 3-ketoacyl-CoA synthase 11-like	Sesamum indicum	NA	NA	NA	NA	NA
TR39455|c0_g5_i4	524	466	-0.169237	0.78299	1.07679	No	PREDICTED: monothiol glutaredoxin-S17	Sesamum indicum	NA	NA	NA	NA	NA
TR41853|c1_g6_i2	428	380	-0.171611	0.782987	1.07681	No	PREDICTED: RNA polymerase sigma factor sigF, chloroplastic isoform X2	Sesamum indicum	NA	NA	NA	NA	NA
TR40816|c2_g4_i4	562	500	-0.168642	0.782978	1.07683	No	phytoene synthase	Pogostemon cablin	Lamiaceae	biosynthetic process[GO:0009058]	transferase activity, transferring alkyl or aryl (other than methyl) groups[GO:0016765]	NA	NA
TR42787|c0_g8_i2	240	272	0.180572	0.782899	1.07674	No	hypothetical protein MIMGU_mgv1a003528mg	Mimulus guttatus	NA	metabolic process[GO:0008152]	phosphotransferase activity, alcohol group as acceptor[GO:0016773]	NA	NA
TR39347|c0_g3_i6	272	240	-0.180572	0.782899	1.07677	No	NA	NA	NA	NA	NA	NA	NA
TR37865|c0_g1_i2	730	650	-0.167457	0.782883	1.07677	No	PREDICTED: cysteine protease ATG4-like	Sesamum indicum	NA	NA	NA	NA	NA
TR3357|c2_g3_i1	90	104	0.208587	0.782861	1.0771	No	hypothetical protein M569_01885, partial	Genlisea aurea	NA	NA	NA	NA	NA
TR35311|c0_g7_i9	90	104	0.208587	0.782861	1.07679	No	PREDICTED: ubiquitin-conjugating enzyme E2 5-like	Sesamum indicum	NA	NA	NA	NA	NA
TR3990|c2_g3_i6	90	104	0.208587	0.782861	1.07682	No	NA	NA	NA	NA	NA	NA	NA
TR41776|c1_g1_i10	90	104	0.208587	0.782861	1.07684	No	PREDICTED: uncharacterized protein LOC105170937	Sesamum indicum	NA	NA	NA	NA	NA
TR42542|c0_g2_i1	90	104	0.208587	0.782861	1.07687	No	PREDICTED: growth-regulating factor 2-like	Sesamum indicum	NA	NA	NA	NA	NA
TR42605|c0_g2_i3	90	104	0.208587	0.782861	1.0769	No	PREDICTED: exocyst complex component EXO70B1-like	Sesamum indicum	NA	NA	NA	NA	NA
TR43108|c4_g2_i3	90	104	0.208587	0.782861	1.07692	No	NA	NA	NA	NA	NA	NA	NA
TR43194|c0_g3_i4	90	104	0.208587	0.782861	1.07695	No	PREDICTED: kinesin-like protein klp-3	Erythranthe guttatus	NA	NA	NA	NA	NA
TR34656|c1_g2_i3	104	90	-0.208587	0.782861	1.07697	No	PREDICTED: probable strigolactone esterase DAD2	Sesamum indicum	NA	NA	NA	NA	NA
TR38393|c0_g2_i7	104	90	-0.208587	0.782861	1.077	No	PREDICTED: codeine O-demethylase-like	Sesamum indicum	NA	NA	NA	NA	NA
TR41237|c1_g1_i10	104	90	-0.208587	0.782861	1.07677	No	PREDICTED: wall-associated receptor kinase-like 21	Sesamum indicum	NA	NA	NA	NA	NA
TR42208|c1_g1_i1	104	90	-0.208587	0.782861	1.07705	No	PREDICTED: mitochondrial Rho GTPase 1	Sesamum indicum	NA	NA	NA	NA	NA
TR44350|c0_g1_i2	104	90	-0.208587	0.782861	1.07707	No	NA	NA	NA	NA	NA	NA	NA
TR7844|c1_g1_i8	104	90	-0.208587	0.782861	1.07702	No	hypothetical protein MIMGU_mgv1a008775mg	Mimulus guttatus	NA	NA	NA	NA	NA
TR43419|c1_g1_i1	310	350	0.175087	0.782744	1.07696	No	PREDICTED: probable ubiquitin-conjugating enzyme E2 23	Sesamum indicum	NA	NA	NA	NA	NA
TR42105|c0_g2_i3	784	698	-0.167627	0.782584	1.07677	No	PREDICTED: glyoxysomal processing protease, glyoxysomal	Sesamum indicum	NA	NA	NA	NA	NA
TR7663|c0_g10_i4	222	252	0.182864	0.782539	1.07673	No	PREDICTED: 60S ribosomal protein L32-1-like	Sesamum indicum	NA	NA	NA	NA	NA
TR40304|c1_g2_i1	252	222	-0.182864	0.782539	1.07676	No	PREDICTED: crocetin glucosyltransferase, chloroplastic-like, partial	Sesamum indicum	NA	NA	NA	NA	NA
TR41487|c0_g1_i5	252	222	-0.182864	0.782539	1.07678	No	hypothetical protein MIMGU_mgv1a004432mg	Mimulus guttatus	NA	metabolic process[GO:0008152]	transferase activity, transferring hexosyl groups[GO:0016758]	integral component of membrane[GO:0016021] ; endoplasmic reticulum membrane[GO:0005789]	NA
TR32260|c1_g1_i1	154	176	0.192645	0.782516	1.07678	No	PREDICTED: serine/threonine protein phosphatase 2A regulatory subunit B''beta-like	Sesamum indicum	NA	NA	NA	NA	NA
TR38354|c0_g4_i4	176	154	-0.192645	0.782516	1.0768	No	PREDICTED: uncharacterized protein yqjG-like	Vitis vinifera	NA	NA	NA	NA	NA
TR38910|c1_g1_i3	874	778	-0.167863	0.782459	1.07675	No	PREDICTED: probable receptor-like protein kinase At5g18500	Sesamum indicum	NA	NA	NA	NA	NA
TR42185|c0_g2_i1	1190	1340	0.171271	0.782418	1.07672	No	PREDICTED: ADP-ribosylation factor GTPase-activating protein AGD3-like	Sesamum indicum	NA	NA	NA	NA	NA
TR33469|c1_g3_i2	292	330	0.176498	0.782414	1.07674	No	PREDICTED: glutathione S-transferase DHAR3, chloroplastic	Sesamum indicum	NA	NA	NA	NA	NA
TR29769|c0_g1_i2	710	632	-0.167894	0.782398	1.07674	No	PREDICTED: coiled-coil domain-containing protein 9-like	Sesamum indicum	NA	NA	NA	NA	NA
TR35622|c0_g2_i1	1188	1056	-0.169925	0.782384	1.07675	No	PREDICTED: grpE protein homolog, mitochondrial	Sesamum indicum	NA	NA	NA	NA	NA
TR43185|c0_g1_i3	446	396	-0.171543	0.782372	1.07675	No	PREDICTED: uncharacterized protein LOC105174955 isoform X1	Sesamum indicum	NA	NA	NA	NA	NA
TR40314|c1_g1_i7	1130	1272	0.170776	0.78225	1.07661	No	PREDICTED: glycerol-3-phosphate 2-O-acyltransferase 6-like	Sesamum indicum	NA	NA	NA	NA	NA
TR39431|c1_g2_i1	484	430	-0.17067	0.782216	1.07659	No	PREDICTED: LOW QUALITY PROTEIN: BAG family molecular chaperone regulator 2	Sesamum indicum	NA	NA	NA	NA	NA
TR42203|c0_g1_i2	522	464	-0.169925	0.782164	1.07654	No	PREDICTED: F-box/LRR-repeat protein 10	Sesamum indicum	NA	NA	NA	NA	NA
TR38433|c0_g1_i1	746	664	-0.167992	0.782157	1.07656	No	hypothetical protein MIMGU_mgv1a000096mg	Mimulus guttatus	NA	NA	NA	NA	NA
TR38507|c0_g1_i2	204	232	0.185556	0.782002	1.07637	No	PREDICTED: uncharacterized protein LOC105157994	Sesamum indicum	NA	NA	NA	NA	NA
TR42973|c2_g4_i1	204	232	0.185556	0.782002	1.0764	No	PREDICTED: mannan endo-1,4-beta-mannosidase 2-like	Sesamum indicum	NA	NA	NA	NA	NA
TR32828|c2_g1_i2	232	204	-0.185556	0.782002	1.07642	No	PREDICTED: probable pectate lyase 8	Sesamum indicum	NA	NA	NA	NA	NA
TR32969|c0_g1_i2	232	204	-0.185556	0.782002	1.07645	No	PREDICTED: putative clathrin assembly protein At2g01600	Sesamum indicum	NA	NA	NA	NA	NA
TR42288|c0_g2_i1	378	426	0.172467	0.781998	1.07647	No	PREDICTED: beta-adaptin-like protein C	Sesamum indicum	NA	NA	NA	NA	NA
TR35002|c0_g1_i5	326	368	0.174834	0.781938	1.07641	No	PREDICTED: 50S ribosomal protein L3-2, chloroplastic-like	Sesamum indicum	NA	NA	NA	NA	NA
TR8197|c0_g4_i7	368	326	-0.174834	0.781938	1.07644	No	PREDICTED: vacuole membrane protein KMS1-like	Sesamum indicum	NA	NA	NA	NA	NA
TR28802|c2_g2_i7	170	194	0.190522	0.781918	1.07649	No	hypothetical protein MIMGU_mgv1a014223mg	Mimulus guttatus	NA	NA	NA	NA	NA
TR37448|c0_g3_i1	170	194	0.190522	0.781918	1.07656	No	PREDICTED: transmembrane protein 64	Sesamum indicum	NA	NA	NA	NA	NA
TR37982|c1_g1_i2	170	194	0.190522	0.781918	1.07646	No	NA	NA	NA	NA	NA	NA	NA
TR31941|c1_g1_i2	194	170	-0.190522	0.781918	1.07643	No	PREDICTED: soluble inorganic pyrophosphatase-like	Sesamum indicum	NA	NA	NA	NA	NA
TR42029|c0_g2_i3	194	170	-0.190522	0.781918	1.07651	No	PREDICTED: lysM domain receptor-like kinase 3	Sesamum indicum	NA	NA	NA	NA	NA
TR43417|c0_g1_i1	194	170	-0.190522	0.781918	1.07654	No	hypothetical protein MIMGU_mgv1a002548mg	Mimulus guttatus	NA	NA	NA	NA	NA
TR39827|c0_g1_i1	1544	1744	0.175727	0.781902	1.07656	No	PREDICTED: dolichyl-diphosphooligosaccharide--protein glycosyltransferase subunit STT3A	Sesamum indicum	NA	NA	NA	NA	NA
TR30927|c2_g1_i3	2282	2012	-0.181668	0.781587	1.07616	No	PREDICTED: phosphoglycolate phosphatase 1B, chloroplastic-like	Sesamum indicum	NA	NA	NA	NA	NA
TR42551|c1_g1_i5	596	530	-0.16932	0.781579	1.07617	No	PREDICTED: uncharacterized protein LOC105157385	Sesamum indicum	NA	NA	NA	NA	NA
TR38850|c0_g1_i2	348	308	-0.176157	0.781557	1.07617	No	PREDICTED: mediator-associated protein 1-like	Sesamum indicum	NA	NA	NA	NA	NA
TR43844|c0_g2_i3	834	742	-0.168628	0.78136	1.07592	No	hypothetical protein MIMGU_mgv1a000508mg	Mimulus guttatus	NA	proteolysis[GO:0006508]	metalloendopeptidase activity[GO:0004222] ; ATP binding[GO:0005524]	integral component of membrane[GO:0016021]	NA
TR41883|c0_g5_i2	4086	3556	-0.200434	0.781343	1.07592	No	NA	NA	NA	NA	NA	NA	NA
TR33746|c0_g2_i2	520	462	-0.170619	0.781332	1.07593	No	PREDICTED: chromatin structure-remodeling complex subunit RSC2 isoform X1	Sesamum indicum	NA	NA	NA	NA	NA
TR23086|c0_g2_i2	46	54	0.231326	0.781269	1.07587	No	hypothetical protein SOVF_126280 isoform A	Spinacia oleracea	NA	small GTPase mediated signal transduction[GO:0007264] ; protein transport[GO:0015031]	GTP binding[GO:0005525]	intracellular[GO:0005622]	NA
TR24046|c0_g1_i1	46	54	0.231326	0.781269	1.07633	No	hypothetical protein EUGRSUZ_H026192, partial	Eucalyptus grandis	NA	NA	NA	NA	NA
TR28426|c0_g3_i1	46	54	0.231326	0.781269	1.07592	No	PREDICTED: calcium-transporting ATPase 1, endoplasmic reticulum-type-like	Fragaria vesca subsp. vesca	NA	NA	NA	NA	NA
TR33401|c0_g2_i3	46	54	0.231326	0.781269	1.07595	No	NA	NA	NA	NA	NA	NA	NA
TR34351|c0_g1_i1	46	54	0.231326	0.781269	1.07597	No	PREDICTED: transport and Golgi organization 2 homolog	Sesamum indicum	NA	NA	NA	NA	NA
TR34725|c0_g2_i2	46	54	0.231326	0.781269	1.076	No	PREDICTED: heat stress transcription factor A-1b	Nicotiana tomentosiformis	NA	NA	NA	NA	NA
TR34770|c1_g2_i4	46	54	0.231326	0.781269	1.07602	No	PREDICTED: ranBP2-type zinc finger protein At1g67325 isoform X2	Sesamum indicum	NA	NA	NA	NA	NA
TR35001|c0_g2_i7	46	54	0.231326	0.781269	1.07605	No	NA	NA	NA	NA	NA	NA	NA
TR35106|c0_g5_i1	46	54	0.231326	0.781269	1.07607	No	unnamed protein product	Coffea canephora	NA	NA	NA	integral component of membrane[GO:0016021]	NA
TR35362|c0_g2_i2	46	54	0.231326	0.781269	1.0761	No	hypothetical protein ZEAMMB73_691667	Zea mays	NA	NA	NA	NA	NA
TR35709|c1_g1_i9	46	54	0.231326	0.781269	1.07612	No	hypothetical protein MIMGU_mgv1a013679mg	Mimulus guttatus	NA	NA	calcium ion binding[GO:0005509]	NA	NA
TR35867|c0_g1_i3	46	54	0.231326	0.781269	1.07615	No	hypothetical protein MIMGU_mgv1a011818mg	Mimulus guttatus	NA	oxidation-reduction process[GO:0055114]	oxidoreductase activity[GO:0016491]	NA	NA
TR36154|c1_g2_i3	46	54	0.231326	0.781269	1.07618	No	PREDICTED: uncharacterized protein LOC105161952	Sesamum indicum	NA	NA	NA	NA	NA
TR39070|c0_g1_i4	46	54	0.231326	0.781269	1.0762	No	NA	NA	NA	NA	NA	NA	NA
TR39075|c1_g5_i1	46	54	0.231326	0.781269	1.07623	No	unnamed protein product	Coffea canephora	NA	oxidation-reduction process[GO:0055114]	flavin adenine dinucleotide binding[GO:0050660] ; oxidoreductase activity, acting on CH-OH group of donors[GO:0016614]	integral component of membrane[GO:0016021]	NA
TR39405|c0_g2_i1	46	54	0.231326	0.781269	1.07625	No	NA	NA	NA	NA	NA	NA	NA
TR39620|c0_g1_i2	46	54	0.231326	0.781269	1.07628	No	PREDICTED: 2-amino-3-ketobutyrate coenzyme A ligase, mitochondrial isoform X3	Erythranthe guttatus	NA	NA	NA	NA	NA
TR40051|c4_g2_i3	46	54	0.231326	0.781269	1.0763	No	BnaC05g19300D	Brassica napus	NA	metabolic process[GO:0008152]	transferase activity, transferring glycosyl groups[GO:0016757]	integral component of membrane[GO:0016021]	NA
TR40890|c0_g2_i2	46	54	0.231326	0.781269	1.0759	No	PREDICTED: zinc finger CCCH domain-containing protein 44-like isoform X2	Sesamum indicum	NA	NA	NA	NA	NA
TR4092|c0_g1_i1	46	54	0.231326	0.781269	1.07635	No	PREDICTED: uncharacterized protein LOC105158848 isoform X3	Sesamum indicum	NA	NA	NA	NA	NA
TR41821|c0_g1_i6	46	54	0.231326	0.781269	1.07638	No	PREDICTED: probable ADP-ribosylation factor GTPase-activating protein AGD14	Sesamum indicum	NA	NA	NA	NA	NA
TR42149|c0_g2_i12	46	54	0.231326	0.781269	1.0764	No	PREDICTED: G-type lectin S-receptor-like serine/threonine-protein kinase At4g27290	Sesamum indicum	NA	NA	NA	NA	NA
TR42226|c1_g1_i6	46	54	0.231326	0.781269	1.07643	No	NA	NA	NA	NA	NA	NA	NA
TR42699|c0_g5_i2	46	54	0.231326	0.781269	1.07646	No	PREDICTED: MACPF domain-containing protein CAD1-like	Sesamum indicum	NA	NA	NA	NA	NA
TR42767|c0_g3_i1	46	54	0.231326	0.781269	1.07648	No	PREDICTED: LOW QUALITY PROTEIN: ankyrin repeat-containing protein At3g12360-like	Sesamum indicum	NA	NA	NA	NA	NA
TR43094|c0_g4_i1	46	54	0.231326	0.781269	1.07651	No	PREDICTED: protein EARLY FLOWERING 3-like	Sesamum indicum	NA	NA	NA	NA	NA
TR7816|c0_g2_i1	46	54	0.231326	0.781269	1.07653	No	hypothetical protein MIMGU_mgv1a011642mg	Mimulus guttatus	NA	NA	NA	NA	NA
TR22947|c0_g1_i2	54	46	-0.231326	0.781269	1.07656	No	PREDICTED: 6-phosphofructo-2-kinase/fructose-2,6-bisphosphatase	Sesamum indicum	NA	NA	NA	NA	NA
TR29904|c0_g1_i2	54	46	-0.231326	0.781269	1.07658	No	PREDICTED: SPX domain-containing membrane protein At1g63010-like	Brassica napus	NA	NA	NA	NA	NA
TR30587|c0_g2_i1	54	46	-0.231326	0.781269	1.07661	No	PREDICTED: uncharacterized protein LOC105176896	Sesamum indicum	NA	NA	NA	NA	NA
TR31693|c0_g2_i1	54	46	-0.231326	0.781269	1.07663	No	NA	NA	NA	NA	NA	NA	NA
TR3526|c0_g1_i2	54	46	-0.231326	0.781269	1.07666	No	PREDICTED: NAC transcription factor 25 isoform X1	Nicotiana sylvestris	NA	NA	NA	NA	NA
TR35344|c0_g3_i2	54	46	-0.231326	0.781269	1.07668	No	hypothetical protein M569_14214, partial	Genlisea aurea	NA	NA	NA	NA	NA
TR37491|c0_g3_i8	54	46	-0.231326	0.781269	1.07671	No	PREDICTED: actin-related protein 2/3 complex subunit 2B	Sesamum indicum	NA	NA	NA	NA	NA
TR38633|c0_g3_i2	54	46	-0.231326	0.781269	1.07673	No	PREDICTED: uncharacterized protein LOC105163644	Sesamum indicum	NA	NA	NA	NA	NA
TR38647|c0_g6_i1	54	46	-0.231326	0.781269	1.07676	No	NA	NA	NA	NA	NA	NA	NA
TR39011|c1_g1_i6	54	46	-0.231326	0.781269	1.07679	No	PREDICTED: inactive rhomboid protein 1-like	Sesamum indicum	NA	NA	NA	NA	NA
TR39087|c0_g3_i1	54	46	-0.231326	0.781269	1.07681	No	PREDICTED: cytochrome b561 and DOMON domain-containing protein At3g25290-like	Sesamum indicum	NA	NA	NA	NA	NA
TR39894|c1_g3_i11	54	46	-0.231326	0.781269	1.07684	No	PREDICTED: U5 small nuclear ribonucleoprotein 40 kDa protein	Sesamum indicum	NA	NA	NA	NA	NA
TR40001|c0_g7_i2	54	46	-0.231326	0.781269	1.07686	No	PREDICTED: F-box/LRR-repeat protein At5g63520	Sesamum indicum	NA	NA	NA	NA	NA
TR41161|c1_g5_i2	54	46	-0.231326	0.781269	1.07689	No	PREDICTED: lysophospholipid acyltransferase LPEAT1-like isoform X3	Sesamum indicum	NA	NA	NA	NA	NA
TR41600|c0_g1_i4	54	46	-0.231326	0.781269	1.07707	No	ent-kaurene synthase	Plectranthus barbatus	Lamiaceae	metabolic process[GO:0008152]	magnesium ion binding[GO:0000287] ; terpene synthase activity[GO:0010333]	NA	NA
TR42235|c0_g1_i4	54	46	-0.231326	0.781269	1.07694	No	PREDICTED: F-box/kelch-repeat protein At1g30090-like isoform X2	Sesamum indicum	NA	NA	NA	NA	NA
TR42931|c0_g4_i2	54	46	-0.231326	0.781269	1.07696	No	PREDICTED: probable plastid-lipid-associated protein 14, chloroplastic isoform X1	Sesamum indicum	NA	NA	NA	NA	NA
TR43061|c0_g2_i1	54	46	-0.231326	0.781269	1.07699	No	PREDICTED: putative E3 ubiquitin-protein ligase RF4	Sesamum indicum	NA	NA	NA	NA	NA
TR43242|c0_g1_i2	54	46	-0.231326	0.781269	1.07701	No	PREDICTED: uncharacterized protein LOC105170530 isoform X2	Sesamum indicum	NA	NA	NA	NA	NA
TR44348|c1_g3_i2	54	46	-0.231326	0.781269	1.07704	No	hypothetical protein MIMGU_mgv1a002524mg	Mimulus guttatus	NA	NA	NA	NA	NA
TR44750|c1_g1_i2	54	46	-0.231326	0.781269	1.07691	No	PREDICTED: LOW QUALITY PROTEIN: uncharacterized protein LOC105176443	Sesamum indicum	NA	NA	NA	NA	NA
TR44789|c0_g1_i6	342	386	0.174605	0.781216	1.07702	No	PREDICTED: abnormal spindle-like microcephaly-associated protein homolog	Erythranthe guttatus	NA	NA	NA	NA	NA
TR24499|c0_g1_i2	74	86	0.216811	0.781205	1.07715	No	hypothetical protein MIMGU_mgv1a012888mg	Mimulus guttatus	NA	NA	zinc ion binding[GO:0008270]	integral component of membrane[GO:0016021]	NA
TR28427|c1_g2_i1	74	86	0.216811	0.781205	1.07718	No	hypothetical protein MIMGU_mgv1a016042mg	Mimulus guttatus	NA	intracellular signal transduction[GO:0035556]	NA	integral component of membrane[GO:0016021] ; intracellular[GO:0005622]	NA
TR34172|c0_g1_i2	74	86	0.216811	0.781205	1.07708	No	PREDICTED: NEDD8-activating enzyme E1 catalytic subunit	Sesamum indicum	NA	NA	NA	NA	NA
TR39794|c0_g2_i5	74	86	0.216811	0.781205	1.0771	No	PREDICTED: ribosome biogenesis protein BRX1	Sesamum indicum	NA	NA	NA	NA	NA
TR40584|c1_g4_i6	74	86	0.216811	0.781205	1.07713	No	hypothetical protein MIMGU_mgv1a004150mg	Mimulus guttatus	NA	NA	NA	NA	NA
TR42705|c0_g1_i4	74	86	0.216811	0.781205	1.07703	No	PREDICTED: protein DAMAGED DNA-BINDING 2	Sesamum indicum	NA	NA	NA	NA	NA
TR27264|c0_g1_i2	86	74	-0.216811	0.781205	1.07726	No	hypothetical protein MIMGU_mgv1a016575mg	Mimulus guttatus	NA	mitochondrial pyruvate transport[GO:0006850]	NA	mitochondrial inner membrane[GO:0005743]	NA
TR34962|c0_g1_i1	86	74	-0.216811	0.781205	1.07705	No	NA	NA	NA	NA	NA	NA	NA
TR39560|c0_g1_i2	86	74	-0.216811	0.781205	1.07721	No	PREDICTED: F-box/kelch-repeat protein At3g61590	Sesamum indicum	NA	NA	NA	NA	NA
TR39768|c0_g2_i4	86	74	-0.216811	0.781205	1.07723	No	PREDICTED: general transcription factor 3C polypeptide 5-like	Sesamum indicum	NA	NA	NA	NA	NA
TR2248|c0_g1_i5	186	212	0.188762	0.781156	1.07724	No	hypothetical protein MIMGU_mgv1a015477mg	Mimulus guttatus	NA	NA	NA	NA	NA
TR41461|c0_g1_i6	186	212	0.188762	0.781156	1.07721	No	hypothetical protein MIMGU_mgv1a006265mg	Mimulus guttatus	NA	NA	NA	NA	NA
TR43189|c1_g1_i3	186	212	0.188762	0.781156	1.07726	No	PREDICTED: cyclin-dependent kinase E-1	Sesamum indicum	NA	NA	NA	NA	NA
TR23035|c0_g1_i1	212	186	-0.188762	0.781156	1.07729	No	cinnamate 4-hydroxylase, partial	Neolamarckia cadamba	NA	oxidation-reduction process[GO:0055114]	heme binding[GO:0020037] ; oxidoreductase activity, acting on paired donors, with incorporation or reduction of molecular oxygen[GO:0016705] ; monooxygenase activity[GO:0004497] ; iron ion binding[GO:0005506]	NA	NA
TR40696|c0_g3_i5	632	562	-0.169354	0.781098	1.07724	No	PREDICTED: signal peptide peptidase-like 4 isoform X2	Sesamum indicum	NA	NA	NA	NA	NA
TR34570|c3_g3_i2	538	478	-0.170596	0.780961	1.07707	No	NA	NA	NA	NA	NA	NA	NA
TR37577|c0_g2_i2	220	250	0.184425	0.780939	1.07707	No	PREDICTED: SUMO-activating enzyme subunit 2	Erythranthe guttatus	NA	NA	NA	NA	NA
TR38794|c0_g1_i2	220	250	0.184425	0.780939	1.07709	No	PREDICTED: 65-kDa microtubule-associated protein 8 isoform X1	Sesamum indicum	NA	NA	NA	NA	NA
TR28557|c0_g1_i1	650	578	-0.16937	0.780904	1.07707	No	PREDICTED: glucose-induced degradation protein 8 homolog isoform X2	Sesamum indicum	NA	NA	NA	NA	NA
TR43822|c0_g7_i2	868	772	-0.169094	0.780865	1.07704	No	PREDICTED: pre-mRNA-splicing factor CWC22 homolog	Pyrus x bretschneideri	NA	NA	NA	NA	NA
TR43890|c1_g1_i2	366	324	-0.17585	0.7808	1.07698	No	PREDICTED: glutamate receptor 3.7	Sesamum indicum	NA	NA	NA	NA	NA
TR35292|c0_g1_i3	1430	1268	-0.17346	0.780767	1.07696	No	PREDICTED: B2 protein	Sesamum indicum	NA	NA	NA	NA	NA
TR33468|c0_g2_i4	594	668	0.169385	0.780739	1.07694	No	PREDICTED: peptidyl-prolyl cis-trans isomerase FKBP17-2, chloroplastic	Nelumbo nucifera	NA	NA	NA	NA	NA
TR2778|c0_g2_i12	120	138	0.201634	0.780644	1.07684	No	PREDICTED: uncharacterized protein LOC105157982	Sesamum indicum	NA	NA	NA	NA	NA
TR35478|c0_g1_i1	120	138	0.201634	0.780644	1.07686	No	PREDICTED: metalloendoproteinase 1-like	Sesamum indicum	NA	NA	NA	NA	NA
TR37366|c0_g1_i4	120	138	0.201634	0.780644	1.07689	No	PREDICTED: uncharacterized protein LOC105162718	Sesamum indicum	NA	NA	NA	NA	NA
TR24589|c0_g1_i1	138	120	-0.201634	0.780644	1.07692	No	PREDICTED: probable importin-7 homolog	Sesamum indicum	NA	NA	NA	NA	NA
TR31167|c0_g1_i6	138	120	-0.201634	0.780644	1.07694	No	PREDICTED: protein LURP-one-related 11-like	Sesamum indicum	NA	NA	NA	NA	NA
TR14114|c0_g1_i1	136	156	0.197939	0.780518	1.07692	No	hypothetical protein B456_009G104500	Gossypium raimondii	NA	cellular oxidant detoxification[GO:0098869] ; oxidation-reduction process[GO:0055114] ; response to oxidative stress[GO:0006979]	heme binding[GO:0020037] ; peroxidase activity[GO:0004601]	NA	map00940:Phenylpropanoid biosynthesis(lactoperoxidase[ec:1.11.1.7])
TR33687|c0_g1_i6	156	136	-0.197939	0.780518	1.07682	No	PREDICTED: uncharacterized protein LOC105168496	Sesamum indicum	NA	NA	NA	NA	NA
TR38967|c0_g3_i1	156	136	-0.197939	0.780518	1.07684	No	hypothetical protein MIMGU_mgv1a014400mg	Mimulus guttatus	NA	NA	NA	NA	NA
TR40175|c0_g3_i4	156	136	-0.197939	0.780518	1.07687	No	PREDICTED: protein RRP45A-like isoform X3	Sesamum indicum	NA	NA	NA	NA	NA
TR40272|c2_g3_i2	156	136	-0.197939	0.780518	1.07679	No	PREDICTED: polyol transporter 5-like	Sesamum indicum	NA	NA	NA	NA	NA
TR8306|c1_g1_i3	156	136	-0.197939	0.780518	1.07689	No	hypothetical protein MIMGU_mgv1a001389mg	Mimulus guttatus	NA	intra-Golgi vesicle-mediated transport[GO:0006891]	NA	Golgi transport complex[GO:0017119]	NA
TR37058|c0_g1_i2	518	460	-0.171318	0.780494	1.07691	No	PREDICTED: uncharacterized protein LOC105179895	Sesamum indicum	NA	NA	NA	NA	NA
TR34752|c0_g2_i1	442	392	-0.173193	0.780452	1.07688	No	hypothetical protein MIMGU_mgv1a010813mg	Mimulus guttatus	NA	NA	NA	NA	NA
TR33722|c1_g4_i2	480	426	-0.172181	0.78043	1.07687	No	PREDICTED: 14-3-3-like protein 16R	Sesamum indicum	NA	NA	NA	NA	NA
TR3977|c0_g1_i6	480	426	-0.172181	0.78043	1.0769	No	PREDICTED: uncharacterized protein LOC105179724	Sesamum indicum	NA	NA	NA	NA	NA
TR33964|c1_g2_i1	1638	1450	-0.175882	0.780366	1.07684	No	hypothetical protein MIMGU_mgv1a007004mg	Mimulus guttatus	NA	NA	ATP binding[GO:0005524]	NA	NA
TR34656|c1_g2_i2	306	346	0.17724	0.780359	1.07685	No	PREDICTED: probable strigolactone esterase DAD2	Sesamum indicum	NA	NA	NA	NA	NA
TR41704|c0_g1_i3	1110	986	-0.1709	0.780328	1.07684	No	PREDICTED: LOW QUALITY PROTEIN: dynamin-like protein ARC5	Erythranthe guttatus	NA	NA	NA	NA	NA
TR26288|c0_g1_i3	202	230	0.187279	0.780257	1.07679	No	PREDICTED: caffeoyl-CoA O-methyltransferase	Sesamum indicum	NA	NA	NA	NA	NA
TR43413|c0_g1_i6	202	230	0.187279	0.780257	1.07676	No	PREDICTED: uncharacterized protein LOC105179586	Sesamum indicum	NA	NA	NA	NA	NA
TR3566|c2_g3_i1	104	120	0.206451	0.780256	1.07704	No	hypothetical protein MIMGU_mgv1a008453mg	Mimulus guttatus	NA	NA	NA	NA	NA
TR37975|c0_g1_i1	104	120	0.206451	0.780256	1.07702	No	PREDICTED: inactive beta-amylase 9	Sesamum indicum	NA	NA	NA	NA	NA
TR41605|c0_g4_i1	104	120	0.206451	0.780256	1.07686	No	NA	NA	NA	NA	NA	NA	NA
TR43022|c4_g3_i4	104	120	0.206451	0.780256	1.07689	No	PREDICTED: uncharacterized protein LOC105968380	Erythranthe guttatus	NA	NA	NA	NA	NA
TR19435|c0_g1_i1	120	104	-0.206451	0.780256	1.07691	No	hypothetical protein EUGRSUZ_K015082, partial	Eucalyptus grandis	NA	methionine biosynthetic process[GO:0009086] ; methylation[GO:0032259]	zinc ion binding[GO:0008270] ; 5-methyltetrahydropteroyltriglutamate-homocysteine S-methyltransferase activity[GO:0003871]	NA	map00450:Selenocompound metabolism(S-methyltransferase[ec:2.1.1.14]) ; map00270:Cysteine and methionine metabolism(S-methyltransferase[ec:2.1.1.14])
TR30328|c1_g1_i6	120	104	-0.206451	0.780256	1.07694	No	NA	NA	NA	NA	NA	NA	NA
TR31406|c0_g1_i1	120	104	-0.206451	0.780256	1.07696	No	PREDICTED: dnaJ homolog subfamily B member 4-like	Sesamum indicum	NA	NA	NA	NA	NA
TR35143|c0_g1_i1	120	104	-0.206451	0.780256	1.07699	No	NA	NA	NA	NA	NA	NA	NA
TR38226|c2_g2_i1	120	104	-0.206451	0.780256	1.07684	No	PREDICTED: probable pectinesterase 53	Sesamum indicum	NA	NA	NA	NA	NA
TR39577|c0_g1_i1	120	104	-0.206451	0.780256	1.07681	No	hypothetical protein MIMGU_mgv1a005684mg	Mimulus guttatus	NA	tRNA thio-modification[GO:0034227] ; tRNA wobble uridine modification[GO:0002098] ; protein urmylation[GO:0032447]	nucleotidyltransferase activity[GO:0016779] ; tRNA binding[GO:0000049]	cytoplasm[GO:0005737]	NA
TR42208|c1_g10_i1	120	104	-0.206451	0.780256	1.07707	No	PREDICTED: mitochondrial Rho GTPase 1	Sesamum indicum	NA	NA	NA	NA	NA
TR42540|c0_g1_i2	120	104	-0.206451	0.780256	1.07709	No	PREDICTED: uncharacterized aarF domain-containing protein kinase 1	Sesamum indicum	NA	NA	NA	NA	NA
TR7439|c0_g1_i3	120	104	-0.206451	0.780256	1.07712	No	NA	NA	NA	NA	NA	NA	NA
TR7936|c0_g1_i4	120	104	-0.206451	0.780256	1.07714	No	NA	NA	NA	NA	NA	NA	NA
TR32600|c0_g3_i2	152	174	0.195016	0.780182	1.07707	No	PREDICTED: uncharacterized protein LOC105951920 isoform X2	Erythranthe guttatus	NA	NA	NA	NA	NA
TR40305|c0_g2_i7	152	174	0.195016	0.780182	1.07709	No	PREDICTED: calcium-dependent protein kinase 32 isoform X2	Sesamum indicum	NA	NA	NA	NA	NA
TR37694|c2_g5_i2	174	152	-0.195016	0.780182	1.07712	No	PREDICTED: uncharacterized protein LOC105157568	Sesamum indicum	NA	NA	NA	NA	NA
TR38031|c0_g2_i9	174	152	-0.195016	0.780182	1.07714	No	PREDICTED: two-component response regulator ARR12-like	Sesamum indicum	NA	NA	NA	NA	NA
TR38319|c0_g1_i3	174	152	-0.195016	0.780182	1.07717	No	PREDICTED: MATE efflux family protein 5-like	Sesamum indicum	NA	NA	NA	NA	NA
TR8127|c1_g4_i3	174	152	-0.195016	0.780182	1.07719	No	hypothetical protein M569_06072, partial	Genlisea aurea	NA	metabolic process[GO:0008152]	transferase activity, transferring acyl groups, acyl groups converted into alkyl on transfer[GO:0046912]	NA	NA
TR25017|c0_g1_i3	384	340	-0.175572	0.780123	1.07714	No	ATP synthase epsilon chain, mitochondrial, putative	Ricinus communis	NA	ATP synthesis coupled proton transport[GO:0015986]	proton-transporting ATPase activity, rotational mechanism[GO:0046961] ; proton-transporting ATP synthase activity, rotational mechanism[GO:0046933]	mitochondrial proton-transporting ATP synthase complex, catalytic core F(1)[GO:0000275]	NA
TR33329|c0_g2_i3	526	592	0.170534	0.78009	1.07712	No	unknown	Medicago truncatula	NA	NA	NA	NA	NA
TR43286|c0_g3_i3	422	374	-0.174205	0.779994	1.07701	No	NA	NA	NA	NA	NA	NA	NA
TR33348|c0_g1_i6	326	288	-0.178803	0.779902	1.07691	No	hypothetical protein MIMGU_mgv1a013526mg	Mimulus guttatus	NA	transport[GO:0006810]	NA	integral component of membrane[GO:0016021]	NA
TR34260|c2_g1_i4	326	288	-0.178803	0.779902	1.07693	No	PREDICTED: mitogen-activated protein kinase 10-like	Fragaria vesca subsp. vesca	NA	NA	NA	NA	NA
TR44820|c0_g1_i2	326	288	-0.178803	0.779902	1.07696	No	PREDICTED: uncharacterized protein LOC105177096 isoform X3	Sesamum indicum	NA	NA	NA	NA	NA
TR33912|c1_g2_i1	984	1108	0.171228	0.779894	1.07697	No	PREDICTED: ATP-dependent Clp protease proteolytic subunit 5, chloroplastic-like	Sesamum indicum	NA	NA	NA	NA	NA
TR32094|c0_g1_i3	542	610	0.170516	0.77987	1.07697	No	PREDICTED: carbonic anhydrase 2-like	Sesamum indicum	NA	NA	NA	NA	NA
TR3360|c0_g1_i1	168	192	0.192645	0.779793	1.07709	No	phenylalanine ammonia-lyase	Solanum melongena	NA	metabolic process[GO:0008152]	ammonia-lyase activity[GO:0016841]	NA	NA
TR40583|c1_g3_i1	168	192	0.192645	0.779793	1.07691	No	NA	NA	NA	NA	NA	NA	NA
TR42162|c1_g1_i10	168	192	0.192645	0.779793	1.07694	No	PREDICTED: protein prenyltransferase alpha subunit repeat-containing protein 1	Sesamum indicum	NA	NA	NA	NA	NA
TR7450|c0_g1_i3	168	192	0.192645	0.779793	1.07689	No	unnamed protein product	Coffea canephora	NA	protein transport[GO:0015031]	protein transporter activity[GO:0008565]	membrane[GO:0016020]	NA
TR35813|c0_g1_i3	192	168	-0.192645	0.779793	1.07699	No	aspartate aminotransferase family protein	Populus trichocarpa	NA	cellular amino acid metabolic process[GO:0006520] ; biosynthetic process[GO:0009058]	pyridoxal phosphate binding[GO:0030170] ; identical protein binding[GO:0042802] ; L-aspartate:2-oxoglutarate aminotransferase activity[GO:0004069] ; L-phenylalanine:2-oxoglutarate aminotransferase activity[GO:0080130]	NA	map00130:Ubiquinone and other terpenoid-quinone biosynthesis(transaminase[ec:2.6.1.5]) ; map00350:Tyrosine metabolism(transaminase[ec:2.6.1.57]) ; map00350:Tyrosine metabolism(transaminase[ec:2.6.1.9]) ; map00350:Tyrosine metabolism(transaminase[ec:2.6.1.5]) ; map00350:Tyrosine metabolism(transaminase[ec:2.6.1.1]) ; map00220:Arginine biosynthesis(transaminase[ec:2.6.1.1]) ; map00950:Isoquinoline …
TR40587|c0_g8_i1	192	168	-0.192645	0.779793	1.07701	No	hypothetical protein MIMGU_mgv1a008582mg	Mimulus guttatus	NA	protein phosphorylation[GO:0006468]	protein kinase activity[GO:0004672] ; ATP binding[GO:0005524]	NA	NA
TR41995|c1_g3_i2	192	168	-0.192645	0.779793	1.07704	No	PREDICTED: DNA-directed RNA polymerase III subunit rpc3 isoform X2	Sesamum indicum	NA	NA	NA	NA	NA
TR43888|c0_g1_i1	192	168	-0.192645	0.779793	1.07706	No	PREDICTED: homeobox-leucine zipper protein ANTHOCYANINLESS 2 isoform X2	Sesamum indicum	NA	NA	NA	NA	NA
TR8247|c1_g5_i1	192	168	-0.192645	0.779793	1.07696	No	PREDICTED: uncharacterized protein LOC105166393	Sesamum indicum	NA	NA	NA	NA	NA
TR43930|c0_g1_i3	1598	1808	0.178127	0.779792	1.07711	No	PREDICTED: chaperone protein ClpB3, chloroplastic isoform X2	Sesamum indicum	NA	NA	NA	NA	NA
TR23447|c1_g1_i2	1248	1408	0.174029	0.77979	1.07714	No	METE_SOLSCRecName: Full=5-methyltetrahydropteroyltriglutamate--homocysteine methyltransferase; AltName: Full=Cobalamin-independent methionine synthase isozyme; AltName: Full=Vitamin-B12-independent methionine synthase isozyme	Plectranthus scutellarioides	Lamiaceae	methionine biosynthetic process[GO:0009086] ; methylation[GO:0032259]	zinc ion binding[GO:0008270] ; 5-methyltetrahydropteroyltriglutamate-homocysteine S-methyltransferase activity[GO:0003871]	cytoplasm[GO:0005737]	map00450:Selenocompound metabolism(S-methyltransferase[ec:2.1.1.14]) ; map00270:Cysteine and methionine metabolism(S-methyltransferase[ec:2.1.1.14])
TR8265|c1_g2_i2	1342	1190	-0.173423	0.779751	1.07711	No	PREDICTED: auxin response factor 2-like	Sesamum indicum	NA	NA	NA	NA	NA
TR44651|c0_g1_i1	9080	7654	-0.246478	0.779662	1.07701	No	hypothetical protein MIMGU_mgv1a000142mg	Mimulus guttatus	NA	glutamate biosynthetic process[GO:0006537] ; oxidation-reduction process[GO:0055114]	glutamate synthase activity[GO:0015930]	NA	NA
TR37029|c1_g1_i2	322	364	0.176878	0.77965	1.07702	No	PREDICTED: nicotinate-nucleotide pyrophosphorylase [carboxylating], chloroplastic	Sesamum indicum	NA	NA	NA	NA	NA
TR40779|c0_g1_i1	322	364	0.176878	0.77965	1.07705	No	PREDICTED: pentatricopeptide repeat-containing protein At3g48250, chloroplastic	Sesamum indicum	NA	NA	NA	NA	NA
TR42709|c1_g1_i1	364	322	-0.176878	0.77965	1.07707	No	NA	NA	NA	NA	NA	NA	NA
TR41055|c0_g1_i2	1072	1208	0.172316	0.779591	1.07701	No	PREDICTED: ABC transporter E family member 2	Sesamum indicum	NA	NA	NA	NA	NA
TR34832|c0_g3_i1	572	508	-0.171187	0.779572	1.07701	No	hypothetical protein MIMGU_mgv1a012069mg	Mimulus guttatus	NA	fatty acid biosynthetic process[GO:0006633] ; oxidation-reduction process[GO:0055114]	oxidoreductase activity[GO:0016491] ; iron ion binding[GO:0005506]	integral component of membrane[GO:0016021]	NA
TR39792|c0_g2_i1	270	306	0.180572	0.779446	1.07689	No	PREDICTED: DNA topoisomerase 6 subunit B isoform X2	Sesamum indicum	NA	NA	NA	NA	NA
TR35951|c0_g2_i4	306	270	-0.180572	0.779446	1.07687	No	PREDICTED: WD-40 repeat-containing protein MSI1	Sesamum indicum	NA	NA	NA	NA	NA
TR44580|c1_g1_i2	798	898	0.170327	0.779419	1.07688	No	NA	NA	NA	NA	NA	NA	NA
TR44237|c0_g1_i3	524	590	0.171148	0.779339	1.07679	No	PREDICTED: ATP-dependent RNA helicase DHX36	Sesamum indicum	NA	NA	NA	NA	NA
TR8045|c1_g1_i1	880	782	-0.170335	0.779328	1.0768	No	PREDICTED: altered inheritance rate of mitochondria protein 25	Sesamum indicum	NA	NA	NA	NA	NA
TR32466|c0_g3_i3	248	218	-0.186012	0.779315	1.07681	No	hypothetical protein MIMGU_mgv1a008353mg	Mimulus guttatus	NA	NA	NA	NA	NA
TR38175|c1_g2_i2	248	218	-0.186012	0.779315	1.07684	No	PREDICTED: uncharacterized protein LOC104235351	Nicotiana sylvestris	NA	NA	NA	NA	NA
TR32649|c0_g1_i2	184	210	0.190684	0.779226	1.07674	No	PREDICTED: transcription initiation factor TFIID subunit 9-like	Sesamum indicum	NA	NA	NA	NA	NA
TR36757|c1_g3_i8	184	210	0.190684	0.779226	1.07677	No	NA	NA	NA	NA	NA	NA	NA
TR33382|c1_g1_i1	718	638	-0.170427	0.77913	1.07666	No	hypothetical protein GLYMA_17G124500	Glycine max	NA	NA	NA	NA	NA
TR43915|c0_g2_i2	1128	1272	0.173332	0.779042	1.07656	No	hypothetical protein MIMGU_mgv1a000409mg	Mimulus guttatus	NA	mitotic chromosome condensation[GO:0007076]	ATP binding[GO:0005524]	condensin complex[GO:0000796] ; nucleus[GO:0005634]	NA
TR36955|c0_g2_i4	458	406	-0.173868	0.779022	1.07656	No	hypothetical protein MIMGU_mgv1a007209mg	Mimulus guttatus	NA	oxidation-reduction process[GO:0055114]	NAD binding[GO:0051287] ; oxidoreductase activity, acting on the CH-OH group of donors, NAD or NADP as acceptor[GO:0016616]	NA	NA
TR37668|c0_g1_i1	382	338	-0.176549	0.779018	1.07658	No	hypothetical protein MIMGU_mgv1a008665mg	Mimulus guttatus	NA	methylation[GO:0032259]	methyltransferase activity[GO:0008168]	NA	NA
TR31785|c1_g1_i1	286	252	-0.182591	0.778959	1.07652	No	hypothetical protein MIMGU_mgv1a020014mg	Mimulus guttatus	NA	recognition of pollen[GO:0048544] ; protein phosphorylation[GO:0006468]	ATP binding[GO:0005524] ; protein serine/threonine kinase activity[GO:0004674]	integral component of membrane[GO:0016021]	NA
TR40704|c1_g2_i3	286	252	-0.182591	0.778959	1.07655	No	PREDICTED: protoheme IX farnesyltransferase, mitochondrial	Sesamum indicum	NA	NA	NA	NA	NA
TR41403|c2_g8_i2	286	252	-0.182591	0.778959	1.07657	No	PREDICTED: zinc-binding alcohol dehydrogenase domain-containing protein 2	Sesamum indicum	NA	NA	NA	NA	NA
TR16675|c0_g1_i1	88	102	0.212994	0.778784	1.07671	No	PREDICTED: cellulose synthase A catalytic subunit 2 [UDP-forming]-like	Nicotiana tomentosiformis	NA	NA	NA	NA	NA
TR2192|c0_g1_i1	88	102	0.212994	0.778784	1.07659	No	PREDICTED: probable galactinol--sucrose galactosyltransferase 2	Sesamum indicum	NA	NA	NA	NA	NA
TR26616|c0_g1_i2	88	102	0.212994	0.778784	1.07641	No	PREDICTED: E3 ubiquitin protein ligase RIE1-like isoform X2	Sesamum indicum	NA	NA	NA	NA	NA
TR32859|c0_g4_i1	88	102	0.212994	0.778784	1.07643	No	PREDICTED: uncharacterized protein LOC105177930	Sesamum indicum	NA	NA	NA	NA	NA
TR36238|c1_g3_i4	88	102	0.212994	0.778784	1.07646	No	NA	NA	NA	NA	NA	NA	NA
TR37073|c0_g5_i6	88	102	0.212994	0.778784	1.07648	No	PREDICTED: probable phytol kinase 3, chloroplastic	Sesamum indicum	NA	NA	NA	NA	NA
TR41867|c2_g3_i4	88	102	0.212994	0.778784	1.07651	No	PREDICTED: uncharacterized protein At5g08430	Sesamum indicum	NA	NA	NA	NA	NA
TR23533|c0_g1_i3	102	88	-0.212994	0.778784	1.07654	No	PREDICTED: chaperone protein dnaJ 10-like	Sesamum indicum	NA	NA	NA	NA	NA
TR26283|c0_g1_i2	102	88	-0.212994	0.778784	1.07656	No	PREDICTED: LOW QUALITY PROTEIN: uncharacterized protein LOC105157853	Sesamum indicum	NA	NA	NA	NA	NA
TR29406|c0_g7_i2	102	88	-0.212994	0.778784	1.07674	No	PREDICTED: LOW QUALITY PROTEIN: U1 small nuclear ribonucleoprotein 70 kDa	Sesamum indicum	NA	NA	NA	NA	NA
TR31666|c0_g1_i2	102	88	-0.212994	0.778784	1.07661	No	PREDICTED: uncharacterized protein LOC105172296	Sesamum indicum	NA	NA	NA	NA	NA
TR34642|c0_g1_i2	102	88	-0.212994	0.778784	1.07638	No	PREDICTED: uncharacterized protein C594.04c	Sesamum indicum	NA	NA	NA	NA	NA
TR36864|c0_g1_i3	102	88	-0.212994	0.778784	1.07666	No	PREDICTED: uncharacterized protein LOC105165614	Sesamum indicum	NA	NA	NA	NA	NA
TR38231|c0_g1_i5	102	88	-0.212994	0.778784	1.07669	No	PREDICTED: uncharacterized protein LOC105164011	Sesamum indicum	NA	NA	NA	NA	NA
TR41498|c0_g8_i2	102	88	-0.212994	0.778784	1.07636	No	PREDICTED: choline/ethanolaminephosphotransferase 2	Brassica oleracea var. oleracea	NA	response to cadmium ion[GO:0046686] ; phospholipid biosynthetic process[GO:0008654]	phosphotransferase activity, for other substituted phosphate groups[GO:0016780]	integral component of membrane[GO:0016021]	NA
TR42636|c1_g2_i1	102	88	-0.212994	0.778784	1.07664	No	PREDICTED: sterol 3-beta-glucosyltransferase UGT80B1	Sesamum indicum	NA	NA	NA	NA	NA
TR44193|c1_g5_i2	1220	1082	-0.173181	0.778637	1.07656	No	PREDICTED: N-alpha-acetyltransferase 15, NatA auxiliary subunit	Sesamum indicum	NA	NA	NA	NA	NA
TR32546|c0_g1_i6	476	422	-0.173719	0.778617	1.07656	No	PREDICTED: N-(5'-phosphoribosyl)anthranilate isomerase 1, chloroplastic isoform X2	Sesamum indicum	NA	NA	NA	NA	NA
TR29316|c1_g1_i4	2432	2138	-0.185881	0.778509	1.07644	No	NA	NA	NA	NA	NA	NA	NA
TR39299|c0_g1_i4	388	438	0.174874	0.778499	1.07645	No	PREDICTED: uncharacterized protein LOC105166467 isoform X2	Sesamum indicum	NA	NA	NA	NA	NA
TR36092|c0_g2_i4	200	228	0.189034	0.778482	1.07645	No	NA	NA	NA	NA	NA	NA	NA
TR25321|c0_g1_i2	228	200	-0.189034	0.778482	1.07648	No	PREDICTED: LOW QUALITY PROTEIN: cystathionine gamma-synthase 1, chloroplastic-like	Sesamum indicum	NA	NA	NA	NA	NA
TR27998|c0_g1_i1	400	354	-0.176251	0.778455	1.07646	No	PREDICTED: multiprotein-bridging factor 1b-like	Sesamum indicum	NA	NA	NA	NA	NA
TR36994|c1_g4_i4	234	266	0.184918	0.77839	1.07648	No	PREDICTED: xyloglucan endotransglucosylase/hydrolase protein 9	Sesamum indicum	NA	NA	NA	NA	NA
TR23728|c0_g1_i1	266	234	-0.184918	0.77839	1.07642	No	NA	NA	NA	NA	NA	NA	NA
TR40647|c0_g4_i4	266	234	-0.184918	0.77839	1.0764	No	PREDICTED: chorismate synthase 1, chloroplastic	Sesamum indicum	NA	NA	NA	NA	NA
TR41675|c1_g4_i2	266	234	-0.184918	0.77839	1.07645	No	PREDICTED: uncharacterized protein LOC105161652	Sesamum indicum	NA	NA	NA	NA	NA
TR43812|c2_g3_i5	268	304	0.181838	0.778094	1.07609	No	NA	NA	NA	NA	NA	NA	NA
TR7968|c3_g1_i3	302	342	0.179448	0.777922	1.07588	No	hypothetical protein JCGZ_21562	Jatropha curcas	NA	NA	NA	NA	NA
TR38287|c0_g1_i2	854	962	0.171801	0.777913	1.07589	No	PREDICTED: protein ASPARTIC PROTEASE IN GUARD CELL 1-like	Sesamum indicum	NA	NA	NA	NA	NA
TR44007|c2_g6_i2	1082	960	-0.172594	0.777907	1.07591	No	PREDICTED: uncharacterized protein LOC105157238 isoform X1	Sesamum indicum	NA	NA	NA	NA	NA
TR37407|c1_g4_i3	380	336	-0.177538	0.777903	1.07593	No	PREDICTED: uncharacterized PKHD-type hydroxylase At1g22950	Sesamum indicum	NA	NA	NA	NA	NA
TR24601|c0_g2_i1	134	154	0.200697	0.777863	1.0759	No	hypothetical protein MIMGU_mgv1a000078mg	Mimulus guttatus	NA	protein ubiquitination[GO:0016567]	ligase activity[GO:0016874] ; ubiquitin-protein transferase activity[GO:0004842]	NA	NA
TR37255|c0_g6_i4	134	154	0.200697	0.777863	1.07595	No	PREDICTED: monothiol glutaredoxin-S16, chloroplastic	Sesamum indicum	NA	NA	NA	NA	NA
TR38915|c1_g1_i1	134	154	0.200697	0.777863	1.07593	No	hypothetical protein MIMGU_mgv1a004240mg	Mimulus guttatus	NA	NA	NA	integral component of membrane[GO:0016021]	NA
TR41171|c0_g6_i1	134	154	0.200697	0.777863	1.07598	No	PREDICTED: UDP-sulfoquinovose synthase, chloroplastic isoform X2	Sesamum indicum	NA	NA	NA	NA	NA
TR38443|c0_g1_i1	154	134	-0.200697	0.777863	1.076	No	hypothetical protein MIMGU_mgv1a007457mg	Mimulus guttatus	NA	NA	NA	NA	NA
TR38504|c0_g5_i1	154	134	-0.200697	0.777863	1.07603	No	hypothetical protein MIMGU_mgv1a006570mg	Mimulus guttatus	NA	NA	zinc ion binding[GO:0008270]	NA	NA
TR42442|c1_g2_i5	154	134	-0.200697	0.777863	1.07605	No	PREDICTED: two-component response regulator ARR12-like	Sesamum indicum	NA	NA	NA	NA	NA
TR34878|c0_g2_i5	172	150	-0.197446	0.777796	1.07599	No	NA	NA	NA	NA	NA	NA	NA
TR39802|c1_g3_i3	172	150	-0.197446	0.777796	1.07601	No	PREDICTED: probable GTP diphosphokinase RSH2, chloroplastic isoform X1	Sesamum indicum	NA	NA	NA	NA	NA
TR25704|c0_g1_i1	1064	944	-0.172639	0.777678	1.07587	No	PREDICTED: 60S acidic ribosomal protein P1-like	Erythranthe guttatus	NA	NA	NA	NA	NA
TR28892|c0_g2_i1	246	216	-0.187627	0.777666	1.07598	No	PREDICTED: hexokinase-1	Sesamum indicum	NA	NA	NA	NA	NA
TR29726|c6_g1_i1	246	216	-0.187627	0.777666	1.07591	No	PREDICTED: xylosyltransferase 1	Sesamum indicum	NA	NA	NA	NA	NA
TR38680|c0_g5_i1	246	216	-0.187627	0.777666	1.07588	No	PREDICTED: 24-methylenesterol C-methyltransferase 2	Sesamum indicum	NA	NA	NA	NA	NA
TR39127|c1_g1_i7	246	216	-0.187627	0.777666	1.07596	No	PREDICTED: 3-oxoacyl-[acyl-carrier-protein] reductase, chloroplastic-like	Nicotiana tomentosiformis	NA	NA	NA	NA	NA
TR7726|c0_g1_i5	246	216	-0.187627	0.777666	1.07593	No	PREDICTED: adenylate kinase, chloroplastic	Sesamum indicum	NA	NA	NA	NA	NA
TR2307|c0_g1_i2	536	604	0.172316	0.777659	1.076	No	NA	NA	NA	NA	NA	NA	NA
TR31997|c0_g1_i2	118	136	0.20482	0.777629	1.07598	No	O-methyltransferase	Sesamum radiatum	NA	methylation[GO:0032259]	O-methyltransferase activity[GO:0008171] ; protein dimerization activity[GO:0046983]	NA	NA
TR36171|c0_g1_i3	118	136	0.20482	0.777629	1.07601	No	PREDICTED: exonuclease mut-7 homolog	Sesamum indicum	NA	NA	NA	NA	NA
TR36956|c0_g6_i1	118	136	0.20482	0.777629	1.07603	No	PREDICTED: eukaryotic translation initiation factor 3 subunit H	Sesamum indicum	NA	NA	NA	NA	NA
TR39342|c1_g1_i5	118	136	0.20482	0.777629	1.07606	No	hypothetical protein MIMGU_mgv1a005840mg	Mimulus guttatus	NA	NA	NA	NA	NA
TR39915|c1_g2_i4	118	136	0.20482	0.777629	1.07609	No	PREDICTED: squalene monooxygenase-like	Sesamum indicum	NA	NA	NA	NA	NA
TR3469|c0_g2_i2	136	118	-0.20482	0.777629	1.07611	No	hypothetical protein MIMGU_mgv1a012952mg	Mimulus guttatus	NA	metabolic process[GO:0008152]	N-acetyltransferase activity[GO:0008080]	NA	NA
TR38154|c1_g1_i2	136	118	-0.20482	0.777629	1.07614	No	hypothetical protein MIMGU_mgv1a006302mg	Mimulus guttatus	NA	translational elongation[GO:0006414]	translation elongation factor activity[GO:0003746] ; GTP binding[GO:0005525] ; GTPase activity[GO:0003924]	intracellular[GO:0005622]	NA
TR39282|c0_g8_i5	136	118	-0.20482	0.777629	1.07619	No	hypothetical protein MIMGU_mgv1a009208mg	Mimulus guttatus	NA	lysine biosynthetic process via diaminopimelate[GO:0009089] ; oxidation-reduction process[GO:0055114]	4-hydroxy-tetrahydrodipicolinate reductase[GO:0008839] ; NADPH binding[GO:0070402]	NA	map00261:Monobactam biosynthesis(reductase[ec:1.17.1.8]) ; map01130:Biosynthesis of antibiotics(reductase[ec:1.17.1.8]) ; map00300:Lysine biosynthesis(reductase[ec:1.17.1.8])
TR40911|c4_g1_i1	136	118	-0.20482	0.777629	1.07616	No	PREDICTED: uncharacterized protein LOC105161457	Sesamum indicum	NA	NA	NA	NA	NA
TR34528|c0_g3_i3	166	190	0.194816	0.777621	1.07623	No	PREDICTED: serine/arginine-rich splicing factor RS31-like isoform X1	Sesamum indicum	NA	NA	NA	NA	NA
TR33658|c0_g9_i1	190	166	-0.194816	0.777621	1.0762	No	PREDICTED: PGR5-like protein 1A, chloroplastic	Sesamum indicum	NA	NA	NA	NA	NA
TR3224|c0_g5_i3	284	250	-0.183963	0.777519	1.07611	No	PREDICTED: 60S ribosomal protein L14-2	Sesamum indicum	NA	NA	NA	NA	NA
TR41344|c0_g5_i1	838	744	-0.171648	0.777515	1.07613	No	PREDICTED: conserved oligomeric Golgi complex subunit 7	Sesamum indicum	NA	NA	NA	NA	NA
TR26058|c0_g1_i4	284	322	0.18117	0.777334	1.07591	No	PREDICTED: cellulose synthase A catalytic subunit 3 [UDP-forming]-like	Malus domestica	NA	NA	NA	NA	NA
TR42387|c1_g1_i5	284	322	0.18117	0.777334	1.07593	No	hypothetical protein MIMGU_mgv1a001397mg	Mimulus guttatus	NA	proteolysis[GO:0006508]	serine-type peptidase activity[GO:0008236]	NA	NA
TR29894|c0_g1_i3	182	208	0.192645	0.777259	1.07588	No	NA	NA	NA	NA	NA	NA	NA
TR42133|c0_g1_i1	182	208	0.192645	0.777259	1.07591	No	PREDICTED: putative disease resistance RPP13-like protein 1	Sesamum indicum	NA	NA	NA	NA	NA
TR8307|c0_g3_i4	182	208	0.192645	0.777259	1.07585	No	PREDICTED: uncharacterized protein LOC105167319 isoform X5	Sesamum indicum	NA	NA	NA	NA	NA
TR37372|c0_g5_i1	616	694	0.172005	0.777229	1.07589	No	PREDICTED: uncharacterized protein LOC105172629	Sesamum indicum	NA	NA	NA	NA	NA
TR33639|c1_g6_i1	502	566	0.173115	0.777227	1.07591	No	hypothetical protein SOVF_176080 isoform B	Spinacia oleracea	NA	NA	calcium ion binding[GO:0005509]	NA	NA
TR38728|c0_g1_i2	1162	1312	0.175158	0.777225	1.07594	No	PREDICTED: signal peptide peptidase-like 2	Erythranthe guttatus	NA	NA	NA	NA	NA
TR40962|c0_g1_i1	454	402	-0.175497	0.777119	1.07581	No	NA	NA	NA	NA	NA	NA	NA
TR40169|c0_g6_i1	820	924	0.172269	0.77708	1.07579	No	PREDICTED: protein ETHYLENE INSENSITIVE 3	Sesamum indicum	NA	NA	NA	NA	NA
TR44681|c0_g1_i1	3318	3816	0.201747	0.776986	1.07568	No	PREDICTED: protein ROS1-like	Sesamum indicum	NA	NA	NA	NA	NA
TR44413|c1_g1_i2	836	742	-0.172084	0.776954	1.07566	No	PREDICTED: carbamoyl-phosphate synthase large chain, chloroplastic	Sesamum indicum	NA	NA	NA	NA	NA
TR16561|c0_g1_i1	58	68	0.229482	0.776866	1.07582	No	PREDICTED: glycine--tRNA ligase 1, mitochondrial-like	Sesamum indicum	NA	NA	NA	NA	NA
TR29685|c0_g1_i2	58	68	0.229482	0.776866	1.07625	No	PREDICTED: probable beta-1,4-xylosyltransferase IRX14	Sesamum indicum	NA	NA	NA	NA	NA
TR33868|c1_g6_i1	58	68	0.229482	0.776866	1.07562	No	PREDICTED: ubiquitin domain-containing protein DSK2b-like	Sesamum indicum	NA	NA	NA	NA	NA
TR36029|c3_g1_i3	58	68	0.229482	0.776866	1.07564	No	hypothetical protein MIMGU_mgv1a008085mg	Mimulus guttatus	NA	NA	NA	NA	NA
TR39867|c1_g1_i7	58	68	0.229482	0.776866	1.07567	No	hypothetical protein MIMGU_mgv1a0114402mg, partial	Mimulus guttatus	NA	NA	NA	NA	NA
TR40588|c0_g4_i2	58	68	0.229482	0.776866	1.07569	No	PREDICTED: DNA-directed RNA polymerases I and III subunit rpac1	Sesamum indicum	NA	NA	NA	NA	NA
TR40849|c0_g2_i2	58	68	0.229482	0.776866	1.07572	No	PREDICTED: RNA pseudouridine synthase 2, chloroplastic	Sesamum indicum	NA	NA	NA	NA	NA
TR41656|c0_g4_i10	58	68	0.229482	0.776866	1.07574	No	hypothetical protein CISIN_1g0122621mg, partial	Citrus sinensis	NA	carbohydrate metabolic process[GO:0005975]	hydrolase activity, hydrolyzing O-glycosyl compounds[GO:0004553]	NA	NA
TR43119|c0_g1_i3	58	68	0.229482	0.776866	1.07577	No	PREDICTED: membrane-bound transcription factor site-2 protease	Sesamum indicum	NA	NA	NA	NA	NA
TR43602|c0_g4_i1	58	68	0.229482	0.776866	1.0758	No	PREDICTED: CSC1-like protein At1g32090	Sesamum indicum	NA	NA	NA	NA	NA
TR44019|c0_g1_i6	58	68	0.229482	0.776866	1.07557	No	PREDICTED: uncharacterized protein LOC105178452	Sesamum indicum	NA	NA	NA	NA	NA
TR7417|c0_g1_i4	58	68	0.229482	0.776866	1.07585	No	hypothetical protein MIMGU_mgv1a000395mg	Mimulus guttatus	NA	NA	ATP binding[GO:0005524]	NA	NA
TR2828|c0_g1_i1	68	58	-0.229482	0.776866	1.07587	No	PREDICTED: protein TOPLESS	Sesamum indicum	NA	NA	NA	NA	NA
TR29090|c0_g1_i2	68	58	-0.229482	0.776866	1.0759	No	PREDICTED: cycloartenol synthase-like isoform X2	Erythranthe guttatus	NA	NA	NA	NA	NA
TR30161|c0_g1_i2	68	58	-0.229482	0.776866	1.07592	No	PREDICTED: putative HVA22-like protein g	Sesamum indicum	NA	NA	NA	NA	NA
TR31969|c2_g4_i1	68	58	-0.229482	0.776866	1.07595	No	PREDICTED: LOW QUALITY PROTEIN: abscisic acid receptor PYR1-like	Sesamum indicum	NA	NA	NA	NA	NA
TR33092|c0_g1_i2	68	58	-0.229482	0.776866	1.07597	No	PREDICTED: putative homeobox-leucine zipper protein ATHB-51	Sesamum indicum	NA	NA	NA	NA	NA
TR33274|c0_g1_i4	68	58	-0.229482	0.776866	1.076	No	PREDICTED: CBL-interacting protein kinase 18	Sesamum indicum	NA	NA	NA	NA	NA
TR33658|c0_g4_i1	68	58	-0.229482	0.776866	1.07603	No	NA	NA	NA	NA	NA	NA	NA
TR33721|c2_g1_i16	68	58	-0.229482	0.776866	1.07605	No	NA	NA	NA	NA	NA	NA	NA
TR36445|c0_g1_i1	68	58	-0.229482	0.776866	1.07608	No	PREDICTED: transcription factor VOZ1-like isoform X3	Sesamum indicum	NA	NA	NA	NA	NA
TR36906|c0_g1_i2	68	58	-0.229482	0.776866	1.0761	No	PREDICTED: probable sodium-coupled neutral amino acid transporter 6	Sesamum indicum	NA	NA	NA	NA	NA
TR37916|c0_g1_i2	68	58	-0.229482	0.776866	1.07613	No	PREDICTED: uncharacterized protein At1g04910 isoform X2	Sesamum indicum	NA	NA	NA	NA	NA
TR39044|c0_g2_i5	68	58	-0.229482	0.776866	1.07615	No	PREDICTED: uncharacterized protein LOC105958395 isoform X2	Erythranthe guttatus	NA	NA	NA	NA	NA
TR39548|c0_g1_i5	68	58	-0.229482	0.776866	1.07618	No	PREDICTED: uncharacterized protein LOC105169457	Sesamum indicum	NA	NA	NA	NA	NA
TR39585|c1_g5_i2	68	58	-0.229482	0.776866	1.0762	No	PREDICTED: COP9 signalosome complex subunit 5b-like	Sesamum indicum	NA	NA	NA	NA	NA
TR39821|c0_g2_i1	68	58	-0.229482	0.776866	1.07559	No	hypothetical protein SOVF_139530, partial	Spinacia oleracea	NA	protein folding[GO:0006457]	ATP binding[GO:0005524] ; unfolded protein binding[GO:0051082]	NA	NA
TR40582|c0_g2_i1	68	58	-0.229482	0.776866	1.07623	No	NA	NA	NA	NA	NA	NA	NA
TR41263|c2_g2_i2	68	58	-0.229482	0.776866	1.07628	No	PREDICTED: serine/threonine-protein kinase HT1	Sesamum indicum	NA	NA	NA	NA	NA
TR41684|c1_g4_i1	68	58	-0.229482	0.776866	1.07631	No	PREDICTED: protein S-acyltransferase 24-like	Sesamum indicum	NA	NA	NA	NA	NA
TR42125|c0_g3_i5	68	58	-0.229482	0.776866	1.07638	No	hypothetical protein MIMGU_mgv1a002842mg	Mimulus guttatus	NA	metabolic process[GO:0008152]	GTPase activity[GO:0003924] ; GTP binding[GO:0005525]	NA	NA
TR42313|c0_g2_i6	68	58	-0.229482	0.776866	1.07636	No	hypothetical protein MIMGU_mgv1a005783mg	Mimulus guttatus	NA	proteolysis[GO:0006508]	serine-type carboxypeptidase activity[GO:0004185]	NA	NA
TR8906|c0_g1_i1	68	58	-0.229482	0.776866	1.07633	No	NA	NA	NA	NA	NA	NA	NA
TR37236|c0_g4_i6	818	726	-0.172131	0.776857	1.0764	No	hypothetical protein JCGZ_17423	Jatropha curcas	NA	protein transport[GO:0015031] ; regulation of catalytic activity[GO:0050790] ; oxidation-reduction process[GO:0055114]	Rab GDP-dissociation inhibitor activity[GO:0005093] ; oxidoreductase activity[GO:0016491]	NA	NA
TR34132|c2_g1_i7	232	264	0.186413	0.776844	1.0764	No	PREDICTED: uncharacterized protein LOC105964168	Erythranthe guttatus	NA	NA	NA	NA	NA
TR40829|c0_g2_i7	232	264	0.186413	0.776844	1.07643	No	PREDICTED: E3 ubiquitin-protein ligase RING1-like	Sesamum indicum	NA	NA	NA	NA	NA
TR37680|c0_g2_i1	472	418	-0.175284	0.776774	1.07636	No	PREDICTED: branched-chain-amino-acid aminotransferase-like protein 1	Sesamum indicum	NA	NA	NA	NA	NA
TR29122|c0_g1_i1	102	118	0.210218	0.776734	1.07633	No	PREDICTED: thioredoxin F1, chloroplastic-like	Sesamum indicum	NA	NA	NA	NA	NA
TR37048|c0_g1_i2	102	118	0.210218	0.776734	1.07635	No	PREDICTED: pentatricopeptide repeat-containing protein At4g04790, mitochondrial-like	Sesamum indicum	NA	NA	NA	NA	NA
TR37618|c0_g3_i2	102	118	0.210218	0.776734	1.07638	No	PREDICTED: uncharacterized protein LOC105174255	Sesamum indicum	NA	NA	NA	NA	NA
TR38145|c0_g2_i4	102	118	0.210218	0.776734	1.0764	No	PREDICTED: E3 ubiquitin-protein ligase SINAT2 isoform X1	Sesamum indicum	NA	NA	NA	NA	NA
TR42621|c0_g9_i3	102	118	0.210218	0.776734	1.07643	No	PREDICTED: subtilisin-like protease	Sesamum indicum	NA	NA	NA	NA	NA
TR44108|c3_g2_i1	102	118	0.210218	0.776734	1.07646	No	PREDICTED: phosphatidate phosphatase PAH2 isoform X1	Sesamum indicum	NA	NA	NA	NA	NA
TR20014|c0_g1_i2	118	102	-0.210218	0.776734	1.07648	No	ubiquitin	Nymphaea hybrid cultivar	NA	NA	NA	NA	NA
TR32988|c1_g2_i3	118	102	-0.210218	0.776734	1.07651	No	PREDICTED: uncharacterized protein At3g49720-like	Sesamum indicum	NA	NA	NA	NA	NA
TR42266|c0_g1_i1	118	102	-0.210218	0.776734	1.07653	No	hypothetical protein MIMGU_mgv1a001052mg	Mimulus guttatus	NA	NA	DNA binding[GO:0003677] ; protein dimerization activity[GO:0046983]	NA	NA
TR35386|c0_g12_i1	266	302	0.183122	0.776727	1.07655	No	PREDICTED: uncharacterized protein LOC105168489	Sesamum indicum	NA	NA	NA	NA	NA
TR27345|c0_g1_i1	302	266	-0.183122	0.776727	1.07657	No	hypothetical protein B456_012G134400	Gossypium raimondii	NA	mRNA splicing, via spliceosome[GO:0000398]	NA	spliceosomal complex[GO:0005681]	NA
TR30833|c0_g3_i1	302	266	-0.183122	0.776727	1.0766	No	PREDICTED: uncharacterized protein LOC105157216	Sesamum indicum	NA	NA	NA	NA	NA
TR43393|c2_g3_i7	302	266	-0.183122	0.776727	1.07662	No	NA	NA	NA	NA	NA	NA	NA
TR34709|c0_g1_i1	340	300	-0.180572	0.776684	1.07659	No	hypothetical protein M569_01376, partial	Genlisea aurea	NA	metabolic process[GO:0008152]	nucleic acid binding[GO:0003676] ; ATP binding[GO:0005524] ; ATP-dependent helicase activity[GO:0008026]	NA	NA
TR32459|c0_g2_i3	198	226	0.190822	0.776676	1.0766	No	PREDICTED: 60S ribosomal protein L7-1	Sesamum indicum	NA	NA	NA	NA	NA
TR37694|c2_g3_i8	198	226	0.190822	0.776676	1.07671	No	hypothetical protein MIMGU_mgv1a004307mg	Mimulus guttatus	NA	NA	NA	NA	NA
TR43785|c0_g6_i3	198	226	0.190822	0.776676	1.07666	No	PREDICTED: uncharacterized protein LOC105164331 isoform X1	Sesamum indicum	NA	NA	NA	NA	NA
TR44051|c3_g3_i4	198	226	0.190822	0.776676	1.07668	No	PREDICTED: uncharacterized protein LOC105160226	Sesamum indicum	NA	NA	NA	NA	NA
TR35049|c0_g2_i1	226	198	-0.190822	0.776676	1.07663	No	PREDICTED: FKBP12-interacting protein of 37 kDa-like isoform X1	Erythranthe guttatus	NA	NA	NA	NA	NA
TR40836|c0_g2_i2	678	764	0.172287	0.776643	1.07669	No	telomere repeat-binding factor like-protein	Rehmannia glutinosa	NA	NA	NA	NA	NA
TR35692|c0_g1_i2	2630	2306	-0.18967	0.776575	1.07662	No	hypothetical protein MIMGU_mgv1a007875mg	Mimulus guttatus	NA	NA	NA	NA	NA
TR42320|c0_g4_i3	434	384	-0.176589	0.776513	1.07656	No	PREDICTED: FGGY carbohydrate kinase domain-containing protein isoform X1	Sesamum indicum	NA	NA	NA	NA	NA
TR37071|c0_g1_i7	396	350	-0.178146	0.7763	1.07629	No	NA	NA	NA	NA	NA	NA	NA
TR27579|c0_g1_i1	72	84	0.222392	0.776247	1.07637	No	PREDICTED: UDP-glycosyltransferase 90A1-like	Sesamum indicum	NA	NA	NA	NA	NA
TR2952|c2_g1_i1	72	84	0.222392	0.776247	1.07655	No	hypothetical protein CICLE_v10021527mg	Citrus clementina	NA	cell growth[GO:0016049] ; cellulose microfibril organization[GO:0010215]	NA	anchored component of membrane[GO:0031225]	NA
TR30597|c1_g3_i1	72	84	0.222392	0.776247	1.07629	No	PREDICTED: uncharacterized protein LOC105167458	Sesamum indicum	NA	NA	NA	NA	NA
TR30875|c0_g1_i2	72	84	0.222392	0.776247	1.07632	No	PREDICTED: uncharacterized protein LOC105162095	Sesamum indicum	NA	NA	NA	NA	NA
TR32552|c0_g1_i3	72	84	0.222392	0.776247	1.07634	No	PREDICTED: peroxisomal adenine nucleotide carrier 1-like	Sesamum indicum	NA	NA	NA	NA	NA
TR33194|c1_g1_i1	72	84	0.222392	0.776247	1.07624	No	PREDICTED: uncharacterized protein LOC105170878	Sesamum indicum	NA	NA	NA	NA	NA
TR3329|c0_g2_i1	72	84	0.222392	0.776247	1.07639	No	NA	NA	NA	NA	NA	NA	NA
TR34093|c0_g1_i2	72	84	0.222392	0.776247	1.07642	No	PREDICTED: probable protein phosphatase 2C 25	Sesamum indicum	NA	NA	NA	NA	NA
TR35460|c0_g3_i1	72	84	0.222392	0.776247	1.07644	No	hypothetical protein MIMGU_mgv1a002686mg	Mimulus guttatus	NA	NA	NA	NA	NA
TR35580|c0_g3_i1	72	84	0.222392	0.776247	1.07647	No	PREDICTED: constitutive photomorphogenesis protein 10	Sesamum indicum	NA	NA	NA	NA	NA
TR35963|c0_g2_i7	72	84	0.222392	0.776247	1.0765	No	PREDICTED: uncharacterized protein LOC105166884 isoform X2	Sesamum indicum	NA	NA	NA	NA	NA
TR40596|c1_g1_i1	72	84	0.222392	0.776247	1.07652	No	PREDICTED: uncharacterized protein LOC105165931 isoform X2	Sesamum indicum	NA	NA	NA	NA	NA
TR41437|c0_g2_i1	72	84	0.222392	0.776247	1.07627	No	PREDICTED: probable E3 ubiquitin-protein ligase ARI2 isoform X1	Sesamum indicum	NA	NA	NA	NA	NA
TR43725|c3_g4_i2	72	84	0.222392	0.776247	1.07657	No	PREDICTED: ankyrin repeat protein SKIP35-like	Sesamum indicum	NA	NA	NA	NA	NA
TR44417|c1_g1_i2	72	84	0.222392	0.776247	1.0766	No	PREDICTED: autophagy-related protein 18g-like	Sesamum indicum	NA	NA	NA	NA	NA
TR44574|c2_g8_i2	72	84	0.222392	0.776247	1.07662	No	PREDICTED: sister chromatid cohesion 1 protein 4	Sesamum indicum	NA	NA	NA	NA	NA
TR34080|c2_g2_i3	84	72	-0.222392	0.776247	1.07665	No	NA	NA	NA	NA	NA	NA	NA
TR34763|c2_g5_i3	84	72	-0.222392	0.776247	1.07667	No	PREDICTED: L-ascorbate oxidase homolog	Sesamum indicum	NA	NA	NA	NA	NA
TR35585|c0_g1_i2	84	72	-0.222392	0.776247	1.0767	No	PREDICTED: cysteine-rich receptor-like protein kinase 2	Sesamum indicum	NA	NA	NA	NA	NA
TR36278|c0_g1_i3	84	72	-0.222392	0.776247	1.07673	No	PREDICTED: probable receptor-like protein kinase At5g47070 isoform X2	Sesamum indicum	NA	NA	NA	NA	NA
TR3649|c0_g1_i4	84	72	-0.222392	0.776247	1.07675	No	NA	NA	NA	NA	NA	NA	NA
TR38929|c1_g2_i2	84	72	-0.222392	0.776247	1.07678	No	NA	NA	NA	NA	NA	NA	NA
TR39126|c0_g1_i5	84	72	-0.222392	0.776247	1.07691	No	NA	NA	NA	NA	NA	NA	NA
TR4035|c0_g2_i3	84	72	-0.222392	0.776247	1.07683	No	PREDICTED: salicylic acid-binding protein 2-like	Sesamum indicum	NA	NA	NA	NA	NA
TR41357|c0_g3_i2	84	72	-0.222392	0.776247	1.07685	No	PREDICTED: oligopeptide transporter 7-like isoform X1	Sesamum indicum	NA	NA	NA	NA	NA
TR42178|c0_g1_i2	84	72	-0.222392	0.776247	1.07688	No	NA	NA	NA	NA	NA	NA	NA
TR43432|c0_g2_i1	84	72	-0.222392	0.776247	1.0768	No	PREDICTED: uncharacterized protein LOC105176358	Sesamum indicum	NA	NA	NA	NA	NA
TR26065|c0_g3_i2	3438	2996	-0.198532	0.776242	1.07692	No	PREDICTED: histone H2B-like	Sesamum indicum	NA	NA	NA	NA	NA
TR33651|c0_g2_i1	532	600	0.173536	0.776161	1.07684	No	PREDICTED: uncharacterized protein Os08g0359500-like	Erythranthe guttatus	NA	NA	NA	NA	NA
TR41739|c2_g1_i1	452	400	-0.176323	0.776155	1.07685	No	hypothetical protein MIMGU_mgv1a002931mg	Mimulus guttatus	NA	fatty acid biosynthetic process[GO:0006633] ; oxidation-reduction process[GO:0055114]	oxidoreductase activity[GO:0016491] ; iron ion binding[GO:0005506]	integral component of membrane[GO:0016021]	NA
TR36624|c1_g3_i5	316	358	0.180035	0.776131	1.07685	No	PREDICTED: auxin efflux carrier component 7-like	Sesamum indicum	NA	NA	NA	NA	NA
TR33774|c1_g4_i5	358	316	-0.180035	0.776131	1.07687	No	hypothetical protein MIMGU_mgv1a014009mg	Mimulus guttatus	NA	small GTPase mediated signal transduction[GO:0007264] ; protein transport[GO:0015031]	GTP binding[GO:0005525]	intracellular[GO:0005622]	NA
TR32211|c0_g2_i1	3894	3382	-0.203376	0.776077	1.07682	No	PREDICTED: stem-specific protein TSJT1-like	Sesamum indicum	NA	NA	NA	NA	NA
TR36917|c0_g1_i3	282	320	0.182377	0.776029	1.07678	No	NA	NA	NA	NA	NA	NA	NA
TR3104|c0_g1_i1	214	244	0.18927	0.77599	1.07678	No	PREDICTED: mannose-1-phosphate guanylyltransferase 1	Sesamum indicum	NA	NA	NA	NA	NA
TR8176|c1_g4_i3	214	244	0.18927	0.77599	1.07675	No	PREDICTED: protein IQ-DOMAIN 31-like isoform X1	Sesamum indicum	NA	NA	NA	NA	NA
TR38626|c0_g2_i1	660	744	0.172837	0.775976	1.07678	No	PREDICTED: AT-rich interactive domain-containing protein 3-like	Sesamum indicum	NA	NA	NA	NA	NA
TR32125|c0_g1_i6	744	660	-0.172837	0.775976	1.07681	No	15-cis-zeta-carotene isomerase	Erythranthe lewisii	NA	metabolic process[GO:0008152]	isomerase activity[GO:0016853]	integral component of membrane[GO:0016021]	NA
TR33095|c0_g6_i5	13684	11218	-0.286675	0.77596	1.07681	No	NA	NA	NA	NA	NA	NA	NA
TR43305|c0_g3_i3	754	850	0.172898	0.775953	1.07683	No	PREDICTED: LOW QUALITY PROTEIN: linoleate 13S-lipoxygenase 3-1, chloroplastic	Sesamum indicum	NA	NA	NA	NA	NA
TR27823|c0_g2_i1	708	628	-0.172985	0.775909	1.07679	No	PREDICTED: glycine-rich protein 2	Erythranthe guttatus	NA	NA	NA	NA	NA
TR3381|c0_g3_i1	414	366	-0.177787	0.775878	1.07678	No	PREDICTED: probable acyl-activating enzyme 4	Erythranthe guttatus	NA	NA	NA	NA	NA
TR44372|c1_g1_i3	906	1022	0.173812	0.775818	1.07672	No	PREDICTED: intron-binding protein aquarius	Sesamum indicum	NA	NA	NA	NA	NA
TR40426|c0_g3_i1	784	884	0.173193	0.775703	1.07658	No	PREDICTED: serine/threonine-protein kinase BLUS1-like	Sesamum indicum	NA	NA	NA	NA	NA
TR41193|c0_g1_i2	332	376	0.179549	0.77564	1.07652	No	PREDICTED: transcription factor bHLH143-like	Sesamum indicum	NA	NA	NA	NA	NA
TR42316|c0_g1_i2	332	376	0.179549	0.77564	1.07657	No	PREDICTED: KH domain-containing protein At4g18375 isoform X2	Sesamum indicum	NA	NA	NA	NA	NA
TR38902|c0_g1_i3	376	332	-0.179549	0.77564	1.07655	No	NA	NA	NA	NA	NA	NA	NA
TR2161|c0_g8_i1	860	970	0.173648	0.775621	1.07657	No	PREDICTED: DCN1-like protein 1	Sesamum indicum	NA	NA	NA	NA	NA
TR31813|c3_g4_i2	298	338	0.181711	0.775434	1.07634	No	hypothetical protein POPTR_0001s27950g	Populus trichocarpa	NA	microtubule-based process[GO:0007017] ; metabolic process[GO:0008152]	structural constituent of cytoskeleton[GO:0005200] ; GTP binding[GO:0005525] ; GTPase activity[GO:0003924]	microtubule[GO:0005874]	NA
TR35634|c0_g1_i1	298	338	0.181711	0.775434	1.07636	No	PREDICTED: uncharacterized protein LOC105163715	Sesamum indicum	NA	NA	NA	NA	NA
TR34975|c0_g1_i2	530	598	0.174153	0.775405	1.07635	No	cytochrome P450 CYP727B10	Salvia miltiorrhiza	NA	oxidation-reduction process[GO:0055114]	heme binding[GO:0020037] ; oxidoreductase activity, acting on paired donors, with incorporation or reduction of molecular oxygen[GO:0016705] ; monooxygenase activity[GO:0004497] ; iron ion binding[GO:0005506]	integral component of membrane[GO:0016021]	NA
TR34974|c0_g2_i11	164	188	0.197037	0.775402	1.07642	No	PREDICTED: dnaJ homolog subfamily B member 6 isoform X2	Sesamum indicum	NA	NA	NA	NA	NA
TR37236|c0_g4_i7	164	188	0.197037	0.775402	1.0764	No	hypothetical protein MIMGU_mgv1a0068452mg, partial	Mimulus guttatus	NA	protein transport[GO:0015031] ; regulation of catalytic activity[GO:0050790] ; oxidation-reduction process[GO:0055114]	Rab GDP-dissociation inhibitor activity[GO:0005093] ; oxidoreductase activity[GO:0016491]	NA	NA
TR43402|c0_g2_i1	164	188	0.197037	0.775402	1.0765	No	PREDICTED: receptor-like protein 12	Sesamum indicum	NA	NA	NA	NA	NA
TR32093|c0_g1_i7	188	164	-0.197037	0.775402	1.07637	No	NA	NA	NA	NA	NA	NA	NA
TR39569|c0_g4_i2	188	164	-0.197037	0.775402	1.07647	No	PREDICTED: BTB/POZ domain-containing protein At3g05675 isoform X2	Sesamum indicum	NA	NA	NA	NA	NA
TR39607|c0_g1_i2	188	164	-0.197037	0.775402	1.07645	No	hypothetical protein MIMGU_mgv1a006814mg	Mimulus guttatus	NA	NA	NA	NA	NA
TR31648|c0_g1_i3	148	170	0.199938	0.775357	1.07646	No	PREDICTED: 50S ribosomal protein L9, chloroplastic	Sesamum indicum	NA	NA	NA	NA	NA
TR39421|c3_g1_i1	148	170	0.199938	0.775357	1.07649	No	PREDICTED: phospholipase D alpha 1	Sesamum indicum	NA	NA	NA	NA	NA
TR43340|c0_g4_i3	148	170	0.199938	0.775357	1.07651	No	PREDICTED: ribonuclease E/G-like protein, chloroplastic isoform X3	Sesamum indicum	NA	NA	NA	NA	NA
TR44396|c0_g6_i1	148	170	0.199938	0.775357	1.07654	No	hypothetical protein MIMGU_mgv1a000432mg	Mimulus guttatus	NA	NA	NA	NA	NA
TR42263|c0_g4_i2	170	148	-0.199938	0.775357	1.07656	No	hypothetical protein MIMGU_mgv1a000737mg	Mimulus guttatus	NA	protein ubiquitination[GO:0016567]	ligase activity[GO:0016874] ; ubiquitin-protein transferase activity[GO:0004842]	NA	NA
TR42719|c0_g2_i1	264	300	0.184425	0.775342	1.07657	No	PREDICTED: anthranilate synthase alpha subunit 1, chloroplastic	Erythranthe guttatus	NA	NA	NA	NA	NA
TR35904|c0_g2_i1	300	264	-0.184425	0.775342	1.0766	No	PREDICTED: putative golgin subfamily A member 6-like protein 6	Sesamum indicum	NA	NA	NA	NA	NA
TR37294|c0_g2_i3	724	642	-0.173416	0.775294	1.07656	No	PREDICTED: transcription factor MYC4-like	Sesamum indicum	NA	NA	NA	NA	NA
TR34620|c0_g1_i4	180	206	0.194647	0.775252	1.07655	No	PREDICTED: uncharacterized protein LOC105170399	Sesamum indicum	NA	NA	NA	NA	NA
TR39645|c0_g1_i3	206	180	-0.194647	0.775252	1.07652	No	NA	NA	NA	NA	NA	NA	NA
TR38411|c5_g7_i3	610	688	0.173599	0.775231	1.07654	No	AF210698_1malonyl-CoA:ACP transacylase	Perilla frutescens	Lamiaceae	metabolic process[GO:0008152]	[acyl-carrier-protein] S-malonyltransferase activity[GO:0004314]	NA	map00061:Fatty acid biosynthesis(S-malonyltransferase[ec:2.3.1.39])
TR33658|c0_g8_i2	1868	1646	-0.18253	0.775226	1.07656	No	NA	NA	NA	NA	NA	NA	NA
TR33161|c0_g4_i1	132	152	0.203533	0.775139	1.07647	No	PREDICTED: uncharacterized protein LOC105174187	Sesamum indicum	NA	NA	NA	NA	NA
TR39544|c0_g1_i4	132	152	0.203533	0.775139	1.07649	No	PREDICTED: myb-related protein 3R-1-like isoform X1	Sesamum indicum	NA	NA	NA	NA	NA
TR43085|c0_g3_i1	132	152	0.203533	0.775139	1.07652	No	PREDICTED: probable inactive leucine-rich repeat receptor-like protein kinase At3g03770	Sesamum indicum	NA	NA	NA	NA	NA
TR26399|c0_g1_i6	152	132	-0.203533	0.775139	1.07654	No	PREDICTED: UBX domain-containing protein 2	Sesamum indicum	NA	NA	NA	NA	NA
TR3060|c0_g2_i3	152	132	-0.203533	0.775139	1.07657	No	NA	NA	NA	NA	NA	NA	NA
TR42073|c0_g2_i1	152	132	-0.203533	0.775139	1.0766	No	hypothetical protein MIMGU_mgv1a005945mg	Mimulus guttatus	NA	cellular amino acid metabolic process[GO:0006520] ; proteolysis[GO:0006508]	metal ion binding[GO:0046872] ; aminoacylase activity[GO:0004046] ; metallopeptidase activity[GO:0008237]	cytoplasm[GO:0005737]	map00220:Arginine biosynthesis(acid amidohydrolase[ec:3.5.1.14]) ; map01130:Biosynthesis of antibiotics(acid amidohydrolase[ec:3.5.1.14])
TR36192|c0_g1_i5	524	464	-0.175442	0.775138	1.07662	No	PREDICTED: caffeoylshikimate esterase isoform X1	Sesamum indicum	NA	NA	NA	NA	NA
TR44408|c0_g2_i2	542	480	-0.175258	0.774972	1.07641	No	PREDICTED: tRNA(adenine(34)) deaminase, chloroplastic	Sesamum indicum	NA	NA	NA	NA	NA
TR44167|c0_g3_i4	902	1018	0.174538	0.774863	1.07629	No	PREDICTED: pumilio homolog 2-like	Sesamum indicum	NA	NA	NA	NA	NA
TR26437|c0_g1_i2	196	224	0.192645	0.774838	1.07628	No	PREDICTED: translation initiation factor IF-2, chloroplastic isoform X1	Sesamum indicum	NA	NA	NA	NA	NA
TR38446|c0_g3_i4	224	196	-0.192645	0.774838	1.07631	No	PREDICTED: peptidyl-prolyl cis-trans isomerase CYP37, chloroplastic	Sesamum indicum	NA	NA	NA	NA	NA
TR40741|c0_g2_i2	224	196	-0.192645	0.774838	1.07633	No	NA	NA	NA	NA	NA	NA	NA
TR41607|c0_g2_i1	224	196	-0.192645	0.774838	1.07636	No	hypothetical protein MIMGU_mgv1a005546mg	Mimulus guttatus	NA	NA	NA	NA	NA
TR8195|c1_g3_i4	496	560	0.175087	0.774836	1.07638	No	PREDICTED: uncharacterized protein LOC105176694	Sesamum indicum	NA	NA	NA	NA	NA
TR25554|c0_g1_i1	364	412	0.178706	0.774826	1.07639	No	hypothetical protein MIMGU_mgv1a015297mg	Mimulus guttatus	NA	NA	NA	NA	NA
TR44167|c0_g4_i1	656	740	0.173829	0.77472	1.07627	No	PREDICTED: pumilio homolog 2-like	Sesamum indicum	NA	NA	NA	NA	NA
TR36354|c1_g2_i2	740	656	-0.173829	0.77472	1.07629	No	PREDICTED: vesicle-associated membrane protein 714	Sesamum indicum	NA	NA	NA	NA	NA
TR42251|c1_g2_i3	528	596	0.174774	0.774644	1.07622	No	PREDICTED: serine/threonine-protein kinase BLUS1-like isoform X4	Sesamum indicum	NA	NA	NA	NA	NA
TR34835|c0_g1_i1	280	246	-0.186769	0.774582	1.07615	No	hypothetical protein MIMGU_mgv1a007878mg	Mimulus guttatus	NA	metabolic process[GO:0008152]	zinc ion binding[GO:0008270] ; protein-cysteine S-palmitoyltransferase activity[GO:0019706]	integral component of membrane[GO:0016021]	NA
TR42019|c0_g4_i3	280	246	-0.186769	0.774582	1.07618	No	hypothetical protein MIMGU_mgv1a003035mg	Mimulus guttatus	NA	leukotriene biosynthetic process[GO:0019370] ; proteolysis[GO:0006508]	zinc ion binding[GO:0008270] ; metallopeptidase activity[GO:0008237]	NA	NA
TR19773|c0_g1_i1	86	100	0.217591	0.774558	1.07656	No	hypothetical protein MIMGU_mgv1a008533mg	Mimulus guttatus	NA	NA	NA	NA	NA
TR30772|c0_g1_i2	86	100	0.217591	0.774558	1.07638	No	putative ethylene-responsive element binding protein	Salvia miltiorrhiza	NA	NA	NA	NA	NA
TR32366|c0_g1_i1	86	100	0.217591	0.774558	1.07622	No	PREDICTED: uncharacterized protein LOC105163802	Sesamum indicum	NA	NA	NA	NA	NA
TR33791|c0_g11_i1	86	100	0.217591	0.774558	1.07625	No	RNA-dependent RNA polymerase 1	Salvia miltiorrhiza	NA	transcription, RNA-templated[GO:0001172]	RNA-directed RNA polymerase activity[GO:0003968]	NA	NA
TR35016|c0_g4_i3	86	100	0.217591	0.774558	1.07627	No	PREDICTED: uncharacterized protein LOC105174459 isoform X2	Sesamum indicum	NA	NA	NA	NA	NA
TR35201|c0_g2_i5	86	100	0.217591	0.774558	1.0763	No	NA	NA	NA	NA	NA	NA	NA
TR36458|c0_g2_i4	86	100	0.217591	0.774558	1.07633	No	hypothetical protein MIMGU_mgv1a004641mg	Mimulus guttatus	NA	transmembrane transport[GO:0055085]	substrate-specific transmembrane transporter activity[GO:0022891]	integral component of membrane[GO:0016021]	NA
TR37456|c0_g2_i10	86	100	0.217591	0.774558	1.07635	No	PREDICTED: diaminopimelate epimerase, chloroplastic	Sesamum indicum	NA	NA	NA	NA	NA
TR3963|c1_g1_i5	86	100	0.217591	0.774558	1.0762	No	PREDICTED: nicotianamine synthase-like	Sesamum indicum	NA	NA	NA	NA	NA
TR42279|c0_g7_i6	86	100	0.217591	0.774558	1.0764	No	hypothetical protein MIMGU_mgv1a003990mg	Mimulus guttatus	NA	NA	NA	integral component of membrane[GO:0016021]	NA
TR43886|c0_g1_i6	86	100	0.217591	0.774558	1.07643	No	PREDICTED: LOW QUALITY PROTEIN: uncharacterized protein LOC105166233	Sesamum indicum	NA	NA	NA	NA	NA
TR8158|c0_g3_i3	86	100	0.217591	0.774558	1.07645	No	PREDICTED: protein phosphatase 2C 16-like	Sesamum indicum	NA	NA	NA	NA	NA
TR34992|c0_g3_i4	100	86	-0.217591	0.774558	1.07648	No	PREDICTED: suppressor of disruption of TFIIS-like	Sesamum indicum	NA	NA	NA	NA	NA
TR35680|c1_g2_i11	100	86	-0.217591	0.774558	1.07651	No	PREDICTED: uncharacterized protein LOC105177275 isoform X1	Sesamum indicum	NA	NA	NA	NA	NA
TR36050|c0_g1_i6	100	86	-0.217591	0.774558	1.07653	No	NA	NA	NA	NA	NA	NA	NA
TR36345|c0_g2_i2	100	86	-0.217591	0.774558	1.07617	No	hypothetical protein MIMGU_mgv1a010416mg	Mimulus guttatus	NA	carbohydrate metabolic process[GO:0005975]	NA	NA	NA
TR36440|c0_g6_i4	100	86	-0.217591	0.774558	1.07658	No	hypothetical protein MIMGU_mgv11b000466mg	Mimulus guttatus	NA	NA	NA	NA	NA
TR38865|c0_g2_i5	100	86	-0.217591	0.774558	1.07661	No	PREDICTED: magnesium transporter MRS2-3	Erythranthe guttatus	NA	NA	NA	NA	NA
TR43464|c2_g1_i1	100	86	-0.217591	0.774558	1.07663	No	PREDICTED: protein SRG1	Sesamum indicum	NA	NA	NA	NA	NA
TR7402|c0_g2_i1	100	86	-0.217591	0.774558	1.07666	No	putative heat shock protein 90, partial	Ginkgo biloba	NA	protein folding[GO:0006457] ; response to stress[GO:0006950]	ATP binding[GO:0005524] ; unfolded protein binding[GO:0051082]	NA	NA
TR7928|c0_g5_i4	100	86	-0.217591	0.774558	1.07668	No	NA	NA	NA	NA	NA	NA	NA
TR8021|c0_g1_i1	100	86	-0.217591	0.774558	1.07671	No	PREDICTED: uncharacterized protein LOC105179586	Sesamum indicum	NA	NA	NA	NA	NA
TR26887|c1_g1_i4	592	668	0.174251	0.774537	1.07671	No	PREDICTED: protein Asterix-like	Sesamum indicum	NA	NA	NA	NA	NA
TR27086|c0_g1_i1	116	134	0.208108	0.774523	1.07671	No	PREDICTED: uncharacterized protein At2g27730, mitochondrial-like	Sesamum indicum	NA	NA	NA	NA	NA
TR27121|c0_g1_i1	116	134	0.208108	0.774523	1.07674	No	PREDICTED: probable serine/threonine protein phosphatase 2A regulatory subunit B''gamma-like	Solanum tuberosum	NA	NA	NA	NA	NA
TR30730|c0_g1_i3	116	134	0.208108	0.774523	1.07676	No	PREDICTED: LOW QUALITY PROTEIN: linoleate 13S-lipoxygenase 3-1, chloroplastic	Sesamum indicum	NA	NA	NA	NA	NA
TR36471|c0_g3_i2	116	134	0.208108	0.774523	1.07679	No	PREDICTED: probable xyloglucan glycosyltransferase 5	Sesamum indicum	NA	NA	NA	NA	NA
TR37442|c0_g1_i1	116	134	0.208108	0.774523	1.07681	No	PREDICTED: protein NRT1/ PTR FAMILY 7.3	Sesamum indicum	NA	NA	NA	NA	NA
TR39602|c0_g3_i11	116	134	0.208108	0.774523	1.07684	No	PREDICTED: terminal uridylyltransferase 7-like	Sesamum indicum	NA	NA	NA	NA	NA
TR40450|c0_g11_i1	116	134	0.208108	0.774523	1.07697	No	PREDICTED: UDP-galactose transporter 2	Sesamum indicum	NA	NA	NA	NA	NA
TR44055|c1_g4_i1	116	134	0.208108	0.774523	1.07689	No	PREDICTED: probable beta-1,3-galactosyltransferase 16	Sesamum indicum	NA	NA	NA	NA	NA
TR44093|c1_g6_i1	116	134	0.208108	0.774523	1.07692	No	PREDICTED: transcriptional adapter ADA2-like isoform X2	Sesamum indicum	NA	NA	NA	NA	NA
TR28536|c1_g2_i2	134	116	-0.208108	0.774523	1.07694	No	PREDICTED: trafficking protein particle complex subunit 6B	Sesamum indicum	NA	NA	NA	NA	NA
TR43138|c0_g2_i3	134	116	-0.208108	0.774523	1.07687	No	PREDICTED: KH domain-containing protein At4g18375 isoform X2	Sesamum indicum	NA	NA	NA	NA	NA
TR37820|c0_g1_i1	380	430	0.178337	0.774493	1.07695	No	PREDICTED: probable protein S-acyltransferase 23	Sesamum indicum	NA	NA	NA	NA	NA
TR43834|c0_g1_i1	374	330	-0.180572	0.774492	1.07698	No	PREDICTED: ATP-dependent DNA helicase Q-like 4A	Sesamum indicum	NA	NA	NA	NA	NA
TR40116|c1_g2_i2	840	948	0.174498	0.774391	1.07686	No	hypothetical protein MIMGU_mgv1a003186mg	Mimulus guttatus	NA	protein phosphorylation[GO:0006468]	protein kinase activity[GO:0004672] ; ATP binding[GO:0005524]	NA	NA
TR34551|c0_g3_i1	242	212	-0.190943	0.774288	1.07674	No	hypothetical protein MIMGU_mgv1a024151mg	Mimulus guttatus	NA	NA	NA	integral component of membrane[GO:0016021]	NA
TR40138|c0_g1_i1	670	756	0.174225	0.774183	1.07662	No	PREDICTED: WD and tetratricopeptide repeats protein 1 isoform X2	Sesamum indicum	NA	NA	NA	NA	NA
TR44337|c1_g1_i1	296	336	0.182864	0.77417	1.07663	No	PREDICTED: uncharacterized protein LOC105167041 isoform X1	Sesamum indicum	NA	NA	NA	NA	NA
TR3243|c0_g2_i3	336	296	-0.182864	0.77417	1.07666	No	PREDICTED: protein mago nashi homolog	Nicotiana tomentosiformis	NA	NA	NA	nucleus[GO:0005634]	NA
TR36721|c0_g1_i1	336	296	-0.182864	0.77417	1.07668	No	PREDICTED: threonylcarbamoyladenosine tRNA methylthiotransferase	Sesamum indicum	NA	NA	NA	NA	NA
TR39143|c1_g6_i4	3880	3366	-0.205021	0.774133	1.07666	No	hypothetical protein MIMGU_mgv1a0196712mg, partial	Mimulus guttatus	NA	microtubule-based process[GO:0007017] ; metabolic process[GO:0008152]	structural constituent of cytoskeleton[GO:0005200] ; GTP binding[GO:0005525] ; GTPase activity[GO:0003924]	microtubule[GO:0005874]	NA
TR43019|c2_g1_i1	392	346	-0.180082	0.774104	1.07664	No	PREDICTED: phytosulfokine receptor 2-like	Sesamum indicum	NA	NA	NA	NA	NA
TR37958|c0_g3_i1	594	526	-0.1754	0.773879	1.07636	No	PREDICTED: serine/arginine-rich splicing factor SR45-like	Sesamum indicum	NA	NA	NA	NA	NA
TR40212|c0_g4_i1	590	666	0.174807	0.773844	1.07633	No	PREDICTED: TBC1 domain family member 15	Sesamum indicum	NA	NA	NA	NA	NA
TR38537|c1_g5_i1	630	558	-0.175087	0.773822	1.07633	No	PREDICTED: uncharacterized GPI-anchored protein At1g61900-like	Sesamum indicum	NA	NA	NA	NA	NA
TR38991|c0_g2_i1	428	484	0.177396	0.773743	1.07624	No	PREDICTED: cysteine--tRNA ligase, cytoplasmic isoform X1	Sesamum indicum	NA	NA	NA	NA	NA
TR36074|c0_g2_i4	312	354	0.182203	0.773723	1.07624	No	hypothetical protein MIMGU_mgv1a008467mg	Mimulus guttatus	NA	MAPK cascade[GO:0000165]	MAP kinase activity[GO:0004707] ; ATP binding[GO:0005524]	intracellular[GO:0005622]	map04150:mTOR signaling pathway(protein kinase[ec:2.7.11.24])
TR39829|c0_g2_i4	312	354	0.182203	0.773723	1.07627	No	NA	NA	NA	NA	NA	NA	NA
TR41252|c0_g1_i4	312	354	0.182203	0.773723	1.07629	No	PREDICTED: uncharacterized protein LOC105156965	Sesamum indicum	NA	NA	NA	NA	NA
TR40289|c0_g1_i5	354	312	-0.182203	0.773723	1.07632	No	PREDICTED: uridine-cytidine kinase C-like isoform X2	Sesamum indicum	NA	NA	NA	NA	NA
TR44556|c2_g1_i5	260	228	-0.189478	0.773685	1.07629	No	PREDICTED: uncharacterized protein LOC105178931	Sesamum indicum	NA	NA	NA	NA	NA
TR36647|c1_g3_i1	730	824	0.174748	0.773533	1.0761	No	PREDICTED: protein LOW PSII ACCUMULATION 3, chloroplastic	Sesamum indicum	NA	NA	NA	NA	NA
TR39652|c0_g1_i1	278	316	0.18484	0.773374	1.07591	No	PREDICTED: growth-regulating factor 6-like	Sesamum indicum	NA	NA	NA	NA	NA
TR41618|c1_g1_i2	316	278	-0.18484	0.773374	1.07593	No	PREDICTED: uncharacterized protein LOC105166690	Sesamum indicum	NA	NA	NA	NA	NA
TR32400|c0_g1_i2	328	372	0.181607	0.773332	1.0759	No	PREDICTED: probable glycosyltransferase At5g03795	Sesamum indicum	NA	NA	NA	NA	NA
TR41242|c0_g3_i5	858	760	-0.174978	0.773329	1.07595	No	PREDICTED: ATP-dependent RNA helicase-like protein DB10	Sesamum indicum	NA	NA	NA	NA	NA
TR41444|c3_g1_i1	858	760	-0.174978	0.773329	1.07592	No	PREDICTED: LOW QUALITY PROTEIN: N6-adenosine-methyltransferase MT-A70-like	Sesamum indicum	NA	NA	NA	NA	NA
TR38832|c1_g3_i1	446	394	-0.178848	0.773216	1.07582	No	hypothetical protein MIMGU_mgv1a012754mg	Mimulus guttatus	NA	NA	NA	NA	NA
TR43822|c0_g10_i1	446	394	-0.178848	0.773216	1.07584	No	NA	NA	NA	NA	NA	NA	NA
TR44589|c0_g1_i1	3558	3092	-0.202526	0.773207	1.07586	No	PREDICTED: clustered mitochondria protein homolog	Sesamum indicum	NA	NA	NA	NA	NA
TR35756|c0_g1_i3	178	204	0.196692	0.773205	1.07588	No	PREDICTED: uncharacterized protein LOC105178089	Sesamum indicum	NA	NA	NA	NA	NA
TR38776|c0_g2_i6	204	178	-0.196692	0.773205	1.07591	No	cytochrome P450 CYP94C54	Salvia miltiorrhiza	NA	oxidation-reduction process[GO:0055114]	heme binding[GO:0020037] ; oxidoreductase activity, acting on paired donors, with incorporation or reduction of molecular oxygen[GO:0016705] ; monooxygenase activity[GO:0004497] ; iron ion binding[GO:0005506]	NA	NA
TR44387|c1_g6_i1	204	178	-0.196692	0.773205	1.07593	No	PREDICTED: putative pentatricopeptide repeat-containing protein At3g47840	Sesamum indicum	NA	NA	NA	NA	NA
TR7648|c0_g1_i3	204	178	-0.196692	0.773205	1.07596	No	PREDICTED: single-stranded DNA-bindig protein WHY2, mitochondrial	Sesamum indicum	NA	NA	NA	NA	NA
TR35614|c2_g5_i1	162	186	0.199309	0.773138	1.07589	No	PREDICTED: probable calcium-binding protein CML13-like	Cicer arietinum	NA	NA	NA	NA	NA
TR27496|c1_g2_i1	100	116	0.214125	0.773087	1.07602	No	PREDICTED: tobamovirus multiplication protein 2A	Sesamum indicum	NA	NA	NA	NA	NA
TR37705|c0_g1_i6	100	116	0.214125	0.773087	1.0761	No	PREDICTED: light-inducible protein CPRF2	Sesamum indicum	NA	NA	NA	NA	NA
TR40694|c1_g2_i2	100	116	0.214125	0.773087	1.07589	No	PREDICTED: F-box protein At1g10780	Sesamum indicum	NA	NA	NA	NA	NA
TR42412|c1_g2_i1	100	116	0.214125	0.773087	1.07592	No	PREDICTED: microtubule-associated protein 70-2-like	Sesamum indicum	NA	NA	NA	NA	NA
TR43600|c0_g5_i1	100	116	0.214125	0.773087	1.07595	No	NA	NA	NA	NA	NA	NA	NA
TR44372|c1_g1_i7	100	116	0.214125	0.773087	1.07587	No	hypothetical protein MIMGU_mgv1a0217192mg, partial	Mimulus guttatus	NA	NA	NA	NA	NA
TR44832|c1_g2_i1	100	116	0.214125	0.773087	1.076	No	PREDICTED: coiled-coil domain-containing protein 150	Sesamum indicum	NA	NA	NA	NA	NA
TR25551|c0_g1_i1	116	100	-0.214125	0.773087	1.07584	No	hypothetical protein MIMGU_mgv11b021844mg	Mimulus guttatus	NA	NA	NA	NA	NA
TR2973|c0_g4_i4	116	100	-0.214125	0.773087	1.07605	No	PREDICTED: BEL1-like homeodomain protein 1	Sesamum indicum	NA	NA	NA	NA	NA
TR35762|c0_g1_i5	116	100	-0.214125	0.773087	1.07607	No	hypothetical protein MIMGU_mgv1a012144mg	Mimulus guttatus	NA	NA	NA	NA	NA
TR42054|c4_g1_i8	116	100	-0.214125	0.773087	1.07597	No	PREDICTED: proteinaceous RNase P 1, chloroplastic/mitochondrial	Sesamum indicum	NA	NA	NA	NA	NA
TR32930|c0_g1_i2	278	244	-0.188204	0.773084	1.07612	No	PREDICTED: F-box protein At4g18380-like	Sesamum indicum	NA	NA	NA	NA	NA
TR35159|c0_g1_i1	278	244	-0.188204	0.773084	1.07615	No	PREDICTED: nicotinamide adenine dinucleotide transporter 1, chloroplastic	Sesamum indicum	NA	NA	NA	NA	NA
TR44270|c0_g1_i5	278	244	-0.188204	0.773084	1.07617	No	PREDICTED: kinesin heavy chain	Sesamum indicum	NA	NA	NA	NA	NA
TR34871|c0_g3_i2	390	344	-0.181066	0.77299	1.07607	No	NA	NA	NA	NA	NA	NA	NA
TR41164|c0_g6_i1	194	222	0.194503	0.772967	1.07606	No	putative cytochrome P450	Solenostemon scutellarioides	NA	oxidation-reduction process[GO:0055114]	heme binding[GO:0020037] ; oxidoreductase activity, acting on paired donors, with incorporation or reduction of molecular oxygen[GO:0016705] ; monooxygenase activity[GO:0004497] ; iron ion binding[GO:0005506]	integral component of membrane[GO:0016021]	NA
TR38010|c0_g1_i3	222	194	-0.194503	0.772967	1.07609	No	PREDICTED: probable receptor-like protein kinase At2g42960	Sesamum indicum	NA	NA	NA	NA	NA
TR43366|c0_g1_i1	1656	1882	0.184564	0.77295	1.07609	No	PREDICTED: protein PIR	Sesamum indicum	NA	NA	NA	NA	NA
TR42931|c0_g3_i1	294	334	0.184032	0.772893	1.07603	No	hypothetical protein MIMGU_mgv11b005497mg	Mimulus guttatus	NA	protein phosphorylation[GO:0006468]	protein kinase activity[GO:0004672] ; ATP binding[GO:0005524]	NA	NA
TR43016|c1_g4_i10	146	168	0.202493	0.772862	1.07615	No	PREDICTED: protein NRT1/ PTR FAMILY 4.4	Sesamum indicum	NA	NA	NA	NA	NA
TR23231|c0_g1_i1	168	146	-0.202493	0.772862	1.07604	No	PREDICTED: LOW QUALITY PROTEIN: uncharacterized protein LOC105171130	Sesamum indicum	NA	NA	NA	NA	NA
TR32389|c1_g3_i2	168	146	-0.202493	0.772862	1.07607	No	PREDICTED: uncharacterized protein LOC105173480	Sesamum indicum	NA	NA	NA	NA	NA
TR38126|c0_g4_i3	168	146	-0.202493	0.772862	1.07602	No	Receptor region transmembrane domain ring H2 motif protein 1, putative isoform 1	Theobroma cacao	NA	organic substance transport[GO:0071702] ; single-organism transport[GO:0044765] ; macromolecule localization[GO:0033036] ; intracellular transport[GO:0046907]	NA	membrane[GO:0016020]	NA
TR38445|c0_g1_i1	168	146	-0.202493	0.772862	1.07609	No	PREDICTED: uncharacterized protein LOC105174266	Sesamum indicum	NA	NA	NA	NA	NA
TR43809|c0_g2_i1	168	146	-0.202493	0.772862	1.07612	No	hypothetical protein MIMGU_mgv1a0014241mg, partial	Mimulus guttatus	NA	phosphatidylinositol-3-phosphate biosynthetic process[GO:0036092] ; vacuole organization[GO:0007033]	phosphoric ester hydrolase activity[GO:0042578]	NA	NA
TR2952|c3_g4_i1	210	240	0.192645	0.772558	1.07575	No	PREDICTED: protein COBRA-like	Sesamum indicum	NA	NA	NA	NA	NA
TR40652|c0_g6_i3	210	240	0.192645	0.772558	1.07577	No	hypothetical protein MIMGU_mgv1a002611mg	Mimulus guttatus	NA	malate metabolic process[GO:0006108] ; oxidation-reduction process[GO:0055114]	NAD binding[GO:0051287] ; metal ion binding[GO:0046872] ; malate dehydrogenase (decarboxylating) (NAD+) activity[GO:0004471]	NA	map00620:Pyruvate metabolism(dehydrogenase (decarboxylating)[ec:1.1.1.39]) ; map00620:Pyruvate metabolism(dehydrogenase (oxaloacetate-decarboxylating)[ec:1.1.1.38]) ; map00710:Carbon fixation in photosynthetic organisms(dehydrogenase (decarboxylating)[ec:1.1.1.39])
TR31254|c1_g3_i8	260	296	0.187086	0.772523	1.07575	No	NA	NA	NA	NA	NA	NA	NA
TR31834|c0_g1_i4	260	296	0.187086	0.772523	1.07578	No	hypothetical protein MIMGU_mgv1a013346mg	Mimulus guttatus	NA	NA	NA	NA	NA
TR36556|c0_g1_i1	352	310	-0.183307	0.7725	1.07577	No	PREDICTED: endoglucanase 8-like	Sesamum indicum	NA	NA	NA	NA	NA
TR37928|c1_g1_i3	536	474	-0.177346	0.772461	1.07574	No	PREDICTED: casein kinase II subunit beta-like	Sesamum indicum	NA	NA	NA	NA	NA
TR40440|c1_g4_i1	680	768	0.175572	0.772452	1.07576	No	PREDICTED: poly(rC)-binding protein 1	Sesamum indicum	NA	NA	NA	NA	NA
TR39069|c1_g5_i1	426	376	-0.180121	0.772437	1.07576	No	PREDICTED: ubiquitin receptor RAD23c-like	Sesamum indicum	NA	NA	NA	NA	NA
TR44205|c2_g3_i2	426	376	-0.180121	0.772437	1.07579	No	hypothetical protein MIMGU_mgv1a001183mg	Mimulus guttatus	NA	trehalose biosynthetic process[GO:0005992]	catalytic activity[GO:0003824]	NA	NA
TR42711|c0_g1_i1	3058	2666	-0.197912	0.772421	1.07579	No	PREDICTED: multiple C2 and transmembrane domain-containing protein 2-like	Sesamum indicum	NA	NA	NA	NA	NA
TR41341|c0_g1_i1	554	490	-0.177104	0.772395	1.07578	No	PREDICTED: multiple RNA-binding domain-containing protein 1	Sesamum indicum	NA	NA	NA	NA	NA
TR8022|c0_g1_i1	554	490	-0.177104	0.772395	1.0758	No	PREDICTED: external alternative NAD(P)H-ubiquinone oxidoreductase B2, mitochondrial	Sesamum indicum	NA	NA	NA	NA	NA
TR39618|c0_g2_i3	570	644	0.176099	0.772392	1.07582	No	hypothetical protein MIMGU_mgv1a001800mg	Mimulus guttatus	NA	metabolic process[GO:0008152]	catalytic activity[GO:0003824]	NA	NA
TR44464|c2_g1_i1	554	626	0.176277	0.772354	1.0758	No	PREDICTED: non-lysosomal glucosylceramidase	Sesamum indicum	NA	NA	NA	NA	NA
TR34518|c0_g1_i9	130	150	0.206451	0.772345	1.07581	No	hypothetical protein MIMGU_mgv1a0115882mg, partial	Mimulus guttatus	NA	metabolic process[GO:0008152]	ATPase activity[GO:0016887] ; ATP binding[GO:0005524]	NA	map00230:Purine metabolism(adenylpyrophosphatase[ec:3.6.1.3])
TR39131|c0_g5_i3	130	150	0.206451	0.772345	1.07584	No	hypothetical protein MIMGU_mgv1a010704mg	Mimulus guttatus	NA	metabolic process[GO:0008152]	zinc ion binding[GO:0008270] ; protein-cysteine S-palmitoyltransferase activity[GO:0019706]	integral component of membrane[GO:0016021]	NA
TR44816|c2_g2_i3	130	150	0.206451	0.772345	1.07586	No	PREDICTED: CCR4-NOT transcription complex subunit 1 isoform X2	Sesamum indicum	NA	NA	NA	NA	NA
TR33588|c0_g1_i4	150	130	-0.206451	0.772345	1.07589	No	PREDICTED: uncharacterized protein LOC105166615 isoform X1	Sesamum indicum	NA	NA	NA	NA	NA
TR40727|c1_g1_i2	150	130	-0.206451	0.772345	1.07591	No	hypothetical protein MIMGU_mgv1a001106mg	Mimulus guttatus	NA	NA	NA	NA	NA
TR43328|c1_g4_i1	150	130	-0.206451	0.772345	1.07594	No	PREDICTED: calcium permeable stress-gated cation channel 1-like	Sesamum indicum	NA	NA	NA	NA	NA
TR8244|c1_g1_i8	150	130	-0.206451	0.772345	1.07596	No	PREDICTED: inactive leucine-rich repeat receptor-like serine/threonine-protein kinase At1g60630	Sesamum indicum	NA	NA	NA	NA	NA
TR39963|c2_g2_i3	590	522	-0.176665	0.772333	1.07597	No	hypothetical protein MIMGU_mgv1a007276mg	Mimulus guttatus	NA	carbohydrate metabolic process[GO:0005975] ; phosphorylation[GO:0016310]	phosphoribulokinase activity[GO:0008974] ; ATP binding[GO:0005524]	NA	map00710:Carbon fixation in photosynthetic organisms(phosphopentokinase[ec:2.7.1.19])
TR40131|c1_g1_i1	392	444	0.179706	0.77222	1.07584	No	PREDICTED: cytochrome P450 86B1-like	Sesamum indicum	NA	NA	NA	NA	NA
TR35464|c0_g1_i1	444	392	-0.179706	0.77222	1.07587	No	PREDICTED: serine/threonine-protein phosphatase 5	Sesamum indicum	NA	NA	NA	NA	NA
TR37893|c0_g1_i1	920	1040	0.176878	0.772091	1.07571	No	PREDICTED: dolichyl-diphosphooligosaccharide--protein glycosyltransferase subunit 1A	Sesamum indicum	NA	NA	NA	NA	NA
TR37939|c0_g2_i1	258	226	-0.191048	0.772071	1.07571	No	PREDICTED: uncharacterized protein LOC105973042	Erythranthe guttatus	NA	NA	NA	NA	NA
TR40589|c0_g2_i1	258	226	-0.191048	0.772071	1.07574	No	PREDICTED: coronatine-insensitive protein 1	Sesamum indicum	NA	NA	NA	NA	NA
TR22196|c0_g1_i1	44	52	0.241008	0.772034	1.0764	No	hypothetical protein MIMGU_mgv1a002099mg	Mimulus guttatus	NA	NA	NA	NA	NA
TR2762|c1_g1_i1	44	52	0.241008	0.772034	1.07571	No	NA	NA	NA	NA	NA	NA	NA
TR27867|c0_g1_i2	44	52	0.241008	0.772034	1.07576	No	hypothetical protein MIMGU_mgv1a003042mg	Mimulus guttatus	NA	NA	NA	NA	NA
TR28530|c1_g1_i5	44	52	0.241008	0.772034	1.07579	No	hypothetical protein MIMGU_mgv1a008181mg	Mimulus guttatus	NA	NA	NA	NA	NA
TR28749|c0_g1_i3	44	52	0.241008	0.772034	1.07581	No	PREDICTED: protein disulfide-isomerase like 2-1-like	Sesamum indicum	NA	NA	NA	NA	NA
TR29576|c0_g2_i1	44	52	0.241008	0.772034	1.07584	No	hypothetical protein MIMGU_mgv1a001721mg	Mimulus guttatus	NA	NA	NA	NA	NA
TR2965|c0_g1_i2	44	52	0.241008	0.772034	1.07587	No	PREDICTED: beta-xylosidase/alpha-L-arabinofuranosidase 2-like	Sesamum indicum	NA	NA	NA	NA	NA
TR3019|c0_g4_i2	44	52	0.241008	0.772034	1.07589	No	NA	NA	NA	NA	NA	NA	NA
TR31842|c0_g3_i3	44	52	0.241008	0.772034	1.07592	No	NA	NA	NA	NA	NA	NA	NA
TR31946|c0_g1_i6	44	52	0.241008	0.772034	1.07594	No	hypothetical protein MIMGU_mgv1a008599mg	Mimulus guttatus	NA	NA	NA	NA	NA
TR32784|c0_g3_i6	44	52	0.241008	0.772034	1.07597	No	PREDICTED: uncharacterized protein LOC105168308	Sesamum indicum	NA	NA	NA	NA	NA
TR36216|c2_g1_i5	44	52	0.241008	0.772034	1.07599	No	NA	NA	NA	NA	NA	NA	NA
TR37745|c0_g2_i4	44	52	0.241008	0.772034	1.07602	No	NA	NA	NA	NA	NA	NA	NA
TR38434|c0_g3_i6	44	52	0.241008	0.772034	1.07605	No	PREDICTED: putative F-box protein PP2-B12	Sesamum indicum	NA	NA	NA	NA	NA
TR39617|c0_g1_i1	44	52	0.241008	0.772034	1.07607	No	PREDICTED: auxin response factor 6-like	Sesamum indicum	NA	NA	NA	NA	NA
TR39644|c1_g4_i8	44	52	0.241008	0.772034	1.0761	No	NA	NA	NA	NA	NA	NA	NA
TR39781|c1_g3_i1	44	52	0.241008	0.772034	1.07612	No	PREDICTED: uncharacterized protein LOC104092041	Nicotiana tomentosiformis	NA	NA	NA	NA	NA
TR40229|c0_g5_i1	44	52	0.241008	0.772034	1.0762	No	PREDICTED: COP9 signalosome complex subunit 2	Sesamum indicum	NA	NA	NA	NA	NA
TR41023|c0_g1_i2	44	52	0.241008	0.772034	1.07617	No	hypothetical protein CISIN_1g034333mg	Citrus sinensis	NA	NA	NA	NA	NA
TR41176|c1_g3_i12	44	52	0.241008	0.772034	1.07615	No	NA	NA	NA	NA	NA	NA	NA
TR41660|c0_g2_i3	44	52	0.241008	0.772034	1.07622	No	hypothetical protein MIMGU_mgv1a020899mg	Mimulus guttatus	NA	NA	NA	NA	NA
TR42128|c0_g1_i3	44	52	0.241008	0.772034	1.07625	No	PREDICTED: serine/threonine-protein kinase 3-like isoform X2	Nicotiana sylvestris	NA	NA	NA	NA	NA
TR42153|c0_g1_i2	44	52	0.241008	0.772034	1.07628	No	NA	NA	NA	NA	NA	NA	NA
TR42254|c0_g1_i2	44	52	0.241008	0.772034	1.0763	No	NA	NA	NA	NA	NA	NA	NA
TR42377|c0_g2_i4	44	52	0.241008	0.772034	1.07633	No	hypothetical protein MIMGU_mgv1a003465mg	Mimulus guttatus	NA	transmembrane transport[GO:0055085]	substrate-specific transmembrane transporter activity[GO:0022891]	integral component of membrane[GO:0016021]	NA
TR42690|c0_g4_i2	44	52	0.241008	0.772034	1.07635	No	NA	NA	NA	NA	NA	NA	NA
TR44834|c3_g2_i2	44	52	0.241008	0.772034	1.07638	No	PREDICTED: mediator of RNA polymerase II transcription subunit 12 isoform X2	Sesamum indicum	NA	NA	NA	NA	NA
TR7697|c2_g4_i4	44	52	0.241008	0.772034	1.07574	No	PREDICTED: PHD finger protein ALFIN-LIKE 4	Nelumbo nucifera	NA	NA	NA	NA	NA
TR7926|c0_g1_i3	44	52	0.241008	0.772034	1.07643	No	unnamed protein product	Coffea canephora	NA	glycolytic process through fructose-6-phosphate[GO:0061615] ; carbohydrate phosphorylation[GO:0046835] ; fructose 6-phosphate metabolic process[GO:0006002]	6-phosphofructokinase activity[GO:0003872] ; diphosphate-fructose-6-phosphate 1-phosphotransferase activity[GO:0047334] ; ATP binding[GO:0005524]	NA	map00030:Pentose phosphate pathway(phosphohexokinase[ec:2.7.1.11]) ; map00030:Pentose phosphate pathway(1-phosphotransferase[ec:2.7.1.90]) ; map01130:Biosynthesis of antibiotics(phosphohexokinase[ec:2.7.1.11]) ; map01130:Biosynthesis of antibiotics(1-phosphotransferase[ec:2.7.1.90]) ; map00052:Galactose metabolism(phosphohexokinase[ec:2.7.1.11]) ; map00051:Fructose and mannose metabolism(phosphoh…
TR8049|c1_g4_i1	44	52	0.241008	0.772034	1.07646	No	hypothetical protein JCGZ_07794	Jatropha curcas	NA	NA	chromatin binding[GO:0003682] ; nucleotide binding[GO:0000166]	integral component of membrane[GO:0016021]	NA
TR8062|c0_g1_i1	44	52	0.241008	0.772034	1.07648	No	PREDICTED: putative E3 ubiquitin-protein ligase RING1a	Sesamum indicum	NA	NA	NA	NA	NA
TR8221|c0_g1_i1	44	52	0.241008	0.772034	1.07651	No	hypothetical protein MIMGU_mgv1a000079mg	Mimulus guttatus	NA	transport[GO:0006810] ; metabolic process[GO:0008152]	ATPase activity[GO:0016887] ; ATP binding[GO:0005524] ; transporter activity[GO:0005215]	integral component of membrane[GO:0016021]	map00230:Purine metabolism(adenylpyrophosphatase[ec:3.6.1.3])
TR8262|c2_g1_i1	44	52	0.241008	0.772034	1.07653	No	hypothetical protein MIMGU_mgv1a003327mg	Mimulus guttatus	NA	regulation of proton transport[GO:0010155]	NA	integral component of membrane[GO:0016021] ; endoplasmic reticulum[GO:0005783] ; plasma membrane[GO:0005886]	NA
TR2169|c0_g3_i1	52	44	-0.241008	0.772034	1.07656	No	PREDICTED: U4/U6 small nuclear ribonucleoprotein Prp31	Sesamum indicum	NA	NA	NA	NA	NA
TR22896|c0_g1_i3	52	44	-0.241008	0.772034	1.07658	No	PREDICTED: J domain-containing protein spf31	Sesamum indicum	NA	NA	NA	NA	NA
TR2344|c0_g1_i3	52	44	-0.241008	0.772034	1.07661	No	NA	NA	NA	NA	NA	NA	NA
TR27585|c0_g2_i1	52	44	-0.241008	0.772034	1.07664	No	hypothetical protein MIMGU_mgv1a004047mg	Mimulus guttatus	NA	NA	NA	integral component of membrane[GO:0016021]	NA
TR31706|c0_g1_i8	52	44	-0.241008	0.772034	1.07666	No	PREDICTED: uncharacterized protein LOC105174698 isoform X1	Sesamum indicum	NA	NA	NA	NA	NA
TR33086|c0_g2_i1	52	44	-0.241008	0.772034	1.07669	No	PREDICTED: uncharacterized protein LOC105157149	Sesamum indicum	NA	NA	NA	NA	NA
TR33901|c0_g3_i1	52	44	-0.241008	0.772034	1.07671	No	PREDICTED: E3 ubiquitin-protein ligase At1g63170-like	Sesamum indicum	NA	NA	NA	NA	NA
TR34227|c0_g1_i2	52	44	-0.241008	0.772034	1.07674	No	PREDICTED: solute carrier family 40 member 3, chloroplastic isoform X2	Sesamum indicum	NA	NA	NA	NA	NA
TR35051|c1_g2_i1	52	44	-0.241008	0.772034	1.07676	No	NA	NA	NA	NA	NA	NA	NA
TR35359|c1_g6_i1	52	44	-0.241008	0.772034	1.07679	No	PREDICTED: trihelix transcription factor ASIL2-like	Sesamum indicum	NA	NA	NA	NA	NA
TR36261|c0_g1_i3	52	44	-0.241008	0.772034	1.07682	No	NA	NA	NA	NA	NA	NA	NA
TR36878|c0_g1_i7	52	44	-0.241008	0.772034	1.07684	No	PREDICTED: protein REVEILLE 1	Sesamum indicum	NA	NA	NA	NA	NA
TR37081|c0_g2_i5	52	44	-0.241008	0.772034	1.07687	No	PREDICTED: uncharacterized protein LOC104102560	Nicotiana tomentosiformis	NA	NA	NA	NA	NA
TR38345|c0_g1_i1	52	44	-0.241008	0.772034	1.07738	No	PREDICTED: nuclear transcription factor Y subunit A-1-like	Sesamum indicum	NA	NA	NA	NA	NA
TR38380|c0_g1_i1	52	44	-0.241008	0.772034	1.07692	No	PREDICTED: protein PMR5-like	Sesamum indicum	NA	NA	NA	NA	NA
TR39178|c1_g1_i1	52	44	-0.241008	0.772034	1.07694	No	PREDICTED: uncharacterized protein LOC105163715	Sesamum indicum	NA	NA	NA	NA	NA
TR39331|c3_g1_i8	52	44	-0.241008	0.772034	1.07697	No	PREDICTED: polyadenylate-binding protein RBP47-like isoform X2	Sesamum indicum	NA	NA	NA	NA	NA
TR39911|c0_g4_i1	52	44	-0.241008	0.772034	1.077	No	hypothetical protein MIMGU_mgv1a026615mg	Mimulus guttatus	NA	NA	NA	NA	NA
TR39941|c0_g1_i2	52	44	-0.241008	0.772034	1.07702	No	PREDICTED: chromo domain protein LHP1 isoform X5	Sesamum indicum	NA	NA	NA	NA	NA
TR40347|c1_g3_i3	52	44	-0.241008	0.772034	1.07705	No	unnamed protein product	Coffea canephora	NA	NA	NA	NA	NA
TR40624|c0_g4_i1	52	44	-0.241008	0.772034	1.07707	No	NA	NA	NA	NA	NA	NA	NA
TR41347|c0_g2_i3	52	44	-0.241008	0.772034	1.0771	No	PREDICTED: protein SMG7-like	Sesamum indicum	NA	NA	NA	NA	NA
TR41733|c0_g4_i4	52	44	-0.241008	0.772034	1.07712	No	hypothetical protein MIMGU_mgv1a005709mg	Mimulus guttatus	NA	RNA processing[GO:0006396]	RNA binding[GO:0003723] ; nucleotide binding[GO:0000166]	nucleus[GO:0005634] ; intracellular ribonucleoprotein complex[GO:0030529]	NA
TR42060|c0_g2_i4	52	44	-0.241008	0.772034	1.07715	No	NA	NA	NA	NA	NA	NA	NA
TR42713|c0_g1_i2	52	44	-0.241008	0.772034	1.07718	No	PREDICTED: RNA-binding protein 24-B	Sesamum indicum	NA	NA	NA	NA	NA
TR43271|c0_g2_i1	52	44	-0.241008	0.772034	1.0772	No	PREDICTED: phospholipase D beta 1-like	Sesamum indicum	NA	NA	NA	NA	NA
TR43272|c1_g5_i1	52	44	-0.241008	0.772034	1.07723	No	NA	NA	NA	NA	NA	NA	NA
TR43914|c0_g1_i1	52	44	-0.241008	0.772034	1.07725	No	NA	NA	NA	NA	NA	NA	NA
TR44181|c2_g3_i2	52	44	-0.241008	0.772034	1.07728	No	PREDICTED: WD repeat-containing protein 48-like	Sesamum indicum	NA	NA	NA	NA	NA
TR44855|c2_g1_i1	52	44	-0.241008	0.772034	1.07731	No	hypothetical protein MIMGU_mgv1a002674mg	Mimulus guttatus	NA	NA	NA	NA	NA
TR7262|c0_g1_i2	52	44	-0.241008	0.772034	1.07733	No	NA	NA	NA	NA	NA	NA	NA
TR8124|c1_g1_i1	52	44	-0.241008	0.772034	1.07736	No	PREDICTED: protein decapping 5-like isoform X2	Sesamum indicum	NA	NA	NA	NA	NA
TR8182|c0_g4_i2	52	44	-0.241008	0.772034	1.07689	No	PREDICTED: protein root UVB sensitive 3 isoform X2	Sesamum indicum	NA	NA	NA	NA	NA
TR37556|c0_g1_i2	276	314	0.186096	0.772023	1.07739	No	NA	NA	NA	NA	NA	NA	NA
TR41900|c1_g6_i1	784	694	-0.175918	0.772004	1.07739	No	PREDICTED: 2-isopropylmalate synthase A-like	Sesamum indicum	NA	NA	NA	NA	NA
TR44534|c1_g3_i1	342	388	0.18206	0.771866	1.07722	No	PREDICTED: LOW QUALITY PROTEIN: myosin-17-like	Sesamum indicum	NA	NA	NA	NA	NA
TR42885|c0_g2_i2	388	342	-0.18206	0.771866	1.07725	No	PREDICTED: uncharacterized protein LOC105177377	Sesamum indicum	NA	NA	NA	NA	NA
TR36700|c1_g1_i2	1022	904	-0.177001	0.771777	1.07715	No	NA	NA	NA	NA	NA	NA	NA
TR37610|c0_g1_i1	498	440	-0.178642	0.771769	1.07717	No	PREDICTED: F-box protein SKIP17-like	Sesamum indicum	NA	NA	NA	NA	NA
TR36038|c1_g2_i2	456	516	0.178337	0.771677	1.07706	No	PREDICTED: uncharacterized protein LOC105157642	Sesamum indicum	NA	NA	NA	NA	NA
TR40297|c1_g2_i1	406	358	-0.18152	0.771612	1.077	No	PREDICTED: uncharacterized protein LOC105173611 isoform X2	Sesamum indicum	NA	NA	NA	NA	NA
TR33182|c1_g1_i1	844	954	0.176746	0.771575	1.07697	No	PREDICTED: splicing factor U2af small subunit B-like	Sesamum indicum	NA	NA	NA	NA	NA
TR43472|c1_g3_i1	276	242	-0.189661	0.771566	1.07699	No	PREDICTED: protein transport protein SEC23 isoform X1	Sesamum indicum	NA	NA	NA	NA	NA
TR43322|c0_g3_i1	374	424	0.181026	0.771396	1.07678	No	hypothetical protein MIMGU_mgv1a000537mg	Mimulus guttatus	NA	vesicle docking involved in exocytosis[GO:0006904] ; protein transport[GO:0015031]	NA	exocyst[GO:0000145]	NA
TR14369|c0_g1_i1	114	132	0.211504	0.771322	1.07688	No	PREDICTED: LOB domain-containing protein 27-like	Sesamum indicum	NA	NA	NA	NA	NA
TR34463|c0_g1_i13	114	132	0.211504	0.771322	1.07672	No	PREDICTED: uncharacterized protein LOC105976659	Erythranthe guttatus	NA	NA	NA	NA	NA
TR35946|c2_g7_i2	114	132	0.211504	0.771322	1.07675	No	hypothetical protein MIMGU_mgv1a012282mg	Mimulus guttatus	NA	ceramide metabolic process[GO:0006672]	hydrolase activity, acting on carbon-nitrogen (but not peptide) bonds, in linear amides[GO:0016811]	integral component of membrane[GO:0016021]	NA
TR40259|c0_g1_i3	114	132	0.211504	0.771322	1.07677	No	hypothetical protein AALP_AA7G078700	Arabis alpina	NA	NA	NA	NA	NA
TR40499|c1_g3_i1	114	132	0.211504	0.771322	1.0767	No	hypothetical protein MIMGU_mgv1a000794mg	Mimulus guttatus	NA	vesicle-mediated transport[GO:0016192] ; intracellular protein transport[GO:0006886]	zinc ion binding[GO:0008270]	intracellular[GO:0005622]	NA
TR27484|c0_g1_i1	132	114	-0.211504	0.771322	1.07683	No	PREDICTED: RNA polymerase II transcriptional coactivator KIWI-like	Sesamum indicum	NA	NA	NA	NA	NA
TR44808|c2_g1_i1	132	114	-0.211504	0.771322	1.07685	No	PREDICTED: uncharacterized protein LOC105163648	Sesamum indicum	NA	NA	NA	NA	NA
TR8301|c0_g2_i2	132	114	-0.211504	0.771322	1.0768	No	PREDICTED: uncharacterized protein LOC105164372	Sesamum indicum	NA	NA	NA	NA	NA
TR36133|c3_g4_i2	442	390	-0.180572	0.771215	1.07675	No	hypothetical protein MIMGU_mgv1a010259mg	Mimulus guttatus	NA	NA	NA	NA	NA
TR33338|c1_g3_i1	986	872	-0.17726	0.771156	1.0767	No	PREDICTED: uncharacterized membrane protein At1g16860-like isoform X1	Sesamum indicum	NA	NA	NA	NA	NA
TR42709|c1_g1_i4	202	176	-0.19878	0.771117	1.07667	No	PREDICTED: UDP-glycosyltransferase 87A2-like	Sesamum indicum	NA	NA	NA	NA	NA
TR28260|c0_g1_i1	406	460	0.180154	0.771068	1.07663	No	unnamed protein product	Coffea canephora	NA	NA	NA	NA	NA
TR44245|c3_g3_i3	192	220	0.196397	0.771062	1.07664	No	PREDICTED: endoglucanase 6-like isoform X1	Erythranthe guttatus	NA	NA	NA	NA	NA
TR38766|c0_g7_i3	220	192	-0.196397	0.771062	1.07667	No	stearoyl-ACP desaturase	Fraxinus americana	NA	fatty acid biosynthetic process[GO:0006633] ; oxidation-reduction process[GO:0055114]	acyl-[acyl-carrier-protein] desaturase activity[GO:0045300]	chloroplast[GO:0009507]	map01040:Biosynthesis of unsaturated fatty acids(9-desaturase[ec:1.14.19.2]) ; map00061:Fatty acid biosynthesis(9-desaturase[ec:1.14.19.2])
TR8142|c1_g1_i3	220	192	-0.196397	0.771062	1.0767	No	NA	NA	NA	NA	NA	NA	NA
TR39166|c0_g4_i2	1360	1200	-0.180572	0.771052	1.07671	No	unnamed protein product	Coffea canephora	NA	carbohydrate metabolic process[GO:0005975]	hydrolase activity, hydrolyzing O-glycosyl compounds[GO:0004553]	NA	NA
TR2283|c0_g2_i3	70	82	0.228269	0.771037	1.07702	No	PREDICTED: cysteine-rich PDZ-binding protein isoform X2	Sesamum indicum	NA	NA	NA	NA	NA
TR24090|c0_g2_i5	70	82	0.228269	0.771037	1.07692	No	NA	NA	NA	NA	NA	NA	NA
TR31354|c0_g1_i1	70	82	0.228269	0.771037	1.07676	No	PREDICTED: protein PLASTID MOVEMENT IMPAIRED 2	Sesamum indicum	NA	NA	NA	NA	NA
TR31372|c1_g1_i8	70	82	0.228269	0.771037	1.07679	No	PREDICTED: E3 SUMO-protein ligase SIZ1-like	Erythranthe guttatus	NA	NA	NA	NA	NA
TR36840|c0_g2_i1	70	82	0.228269	0.771037	1.07681	No	hypothetical protein MIMGU_mgv1a024191mg	Mimulus guttatus	NA	(1->3)-beta-D-glucan biosynthetic process[GO:0006075]	1,3-beta-D-glucan synthase activity[GO:0003843]	integral component of membrane[GO:0016021] ; 1,3-beta-D-glucan synthase complex[GO:0000148]	map00500:Starch and sucrose metabolism(synthase[ec:2.4.1.34])
TR40153|c1_g2_i7	70	82	0.228269	0.771037	1.07684	No	PREDICTED: uncharacterized protein LOC105160865	Sesamum indicum	NA	NA	NA	NA	NA
TR41382|c1_g4_i1	70	82	0.228269	0.771037	1.07687	No	NA	NA	NA	NA	NA	NA	NA
TR42825|c0_g7_i5	70	82	0.228269	0.771037	1.07689	No	hypothetical protein MIMGU_mgv1a005022mg	Mimulus guttatus	NA	'de novo' AMP biosynthetic process[GO:0044208]	adenylosuccinate synthase activity[GO:0004019] ; metal ion binding[GO:0046872] ; GTP binding[GO:0005525]	NA	map00250:Alanine, aspartate and glutamate metabolism(synthase[ec:6.3.4.4]) ; map00230:Purine metabolism(synthase[ec:6.3.4.4])
TR43334|c1_g3_i5	70	82	0.228269	0.771037	1.07674	No	hypothetical protein MIMGU_mgv1a007847mg	Mimulus guttatus	NA	NA	RNA binding[GO:0003723]	NA	NA
TR8146|c0_g2_i5	70	82	0.228269	0.771037	1.07694	No	NA	NA	NA	NA	NA	NA	NA
TR23787|c1_g1_i2	82	70	-0.228269	0.771037	1.07697	No	PREDICTED: dnaJ homolog subfamily B member 7-like isoform X2	Sesamum indicum	NA	NA	NA	NA	NA
TR27893|c0_g1_i1	82	70	-0.228269	0.771037	1.07699	No	PREDICTED: probable 1-acyl-sn-glycerol-3-phosphate acyltransferase 4	Sesamum indicum	NA	NA	NA	NA	NA
TR30421|c1_g1_i1	82	70	-0.228269	0.771037	1.07671	No	PREDICTED: putative disease resistance protein RGA3	Sesamum indicum	NA	NA	NA	NA	NA
TR33732|c1_g8_i3	82	70	-0.228269	0.771037	1.07705	No	PREDICTED: uncharacterized protein LOC105165005	Sesamum indicum	NA	NA	NA	NA	NA
TR34765|c0_g1_i1	82	70	-0.228269	0.771037	1.07736	No	hypothetical protein EUGRSUZ_A01529	Eucalyptus grandis	NA	NA	NA	nucleus[GO:0005634]	NA
TR37060|c0_g1_i3	82	70	-0.228269	0.771037	1.0771	No	PREDICTED: B-box zinc finger protein 22	Sesamum indicum	NA	NA	NA	NA	NA
TR3725|c0_g1_i4	82	70	-0.228269	0.771037	1.07712	No	PREDICTED: prolyl 3-hydroxylase 1 isoform X1	Sesamum indicum	NA	NA	NA	NA	NA
TR3729|c0_g1_i6	82	70	-0.228269	0.771037	1.07715	No	PREDICTED: LOW QUALITY PROTEIN: 50S ribosomal protein L27, chloroplastic-like	Solanum lycopersicum	NA	NA	NA	NA	NA
TR37455|c0_g1_i2	82	70	-0.228269	0.771037	1.07717	No	PREDICTED: zinc finger CCCH domain-containing protein 14-like	Sesamum indicum	NA	NA	NA	NA	NA
TR37805|c0_g6_i1	82	70	-0.228269	0.771037	1.0772	No	hypothetical protein PRUPE_ppa005989mg	Prunus persica	NA	fatty acid beta-oxidation[GO:0006635] ; intra-Golgi vesicle-mediated transport[GO:0006891] ; lipid transport[GO:0006869] ; endosome organization[GO:0007032] ; lithium ion transport[GO:0010351] ; protein targeting to vacuole[GO:0006623] ; protein import into peroxisome matrix[GO:0016558] ; vacuole organization[GO:0007033] ; endosomal transport[GO:0016197] ; trichome branching[GO:0010091]	ATP binding[GO:0005524]	multivesicular body[GO:0005771] ; plasmodesma[GO:0009506] ; nucleus[GO:0005634]	NA
TR39202|c0_g2_i4	82	70	-0.228269	0.771037	1.07723	No	hypothetical protein MIMGU_mgv1a008562mg	Mimulus guttatus	NA	folic acid-containing compound biosynthetic process[GO:0009396] ; oxidation-reduction process[GO:0055114]	methylenetetrahydrofolate dehydrogenase (NADP+) activity[GO:0004488]	NA	map00670:One carbon pool by folate(dehydrogenase (NADP+)[ec:1.5.1.5]) ; map00720:Carbon fixation pathways in prokaryotes(dehydrogenase (NADP+)[ec:1.5.1.5])
TR39722|c3_g2_i3	82	70	-0.228269	0.771037	1.07725	No	PREDICTED: LOW QUALITY PROTEIN: neurofilament heavy polypeptide	Sesamum indicum	NA	NA	NA	NA	NA
TR40643|c0_g1_i10	82	70	-0.228269	0.771037	1.07728	No	PREDICTED: LOW QUALITY PROTEIN: probable serine/threonine-protein kinase WNK3	Sesamum indicum	NA	NA	NA	NA	NA
TR4065|c0_g1_i5	82	70	-0.228269	0.771037	1.0773	No	PREDICTED: enhancer of mRNA-decapping protein 4-like	Sesamum indicum	NA	NA	NA	NA	NA
TR42940|c1_g1_i9	82	70	-0.228269	0.771037	1.07733	No	PREDICTED: uncharacterized protein LOC105156173 isoform X1	Sesamum indicum	NA	NA	NA	NA	NA
TR43926|c1_g2_i4	82	70	-0.228269	0.771037	1.07707	No	PREDICTED: uncharacterized protein LOC105177292 isoform X3	Sesamum indicum	NA	NA	NA	NA	NA
TR38237|c0_g1_i2	324	368	0.183712	0.770977	1.0773	No	PREDICTED: putative lipase YOR059C	Sesamum indicum	NA	NA	NA	NA	NA
TR41365|c0_g1_i3	368	324	-0.183712	0.770977	1.07732	No	unnamed protein product	Coffea canephora	NA	proteolysis[GO:0006508]	metallopeptidase activity[GO:0008237] ; zinc ion binding[GO:0008270]	NA	NA
TR2180|c0_g1_i8	422	478	0.179768	0.77095	1.07731	No	PREDICTED: chromatin structure-remodeling complex protein BSH	Sesamum indicum	NA	NA	NA	NA	NA
TR29248|c0_g1_i2	160	184	0.201634	0.770828	1.07717	No	hypothetical protein MIMGU_mgv1a015415mg	Mimulus guttatus	NA	NA	NA	integral component of membrane[GO:0016021]	NA
TR29333|c0_g1_i2	160	184	0.201634	0.770828	1.07719	No	PREDICTED: 60S ribosomal protein L13-1	Sesamum indicum	NA	NA	NA	NA	NA
TR43310|c0_g4_i2	160	184	0.201634	0.770828	1.07722	No	hypothetical protein CICLE_v10007975mg	Citrus clementina	NA	pectin biosynthetic process[GO:0045489] ; cell wall organization[GO:0071555]	polygalacturonate 4-alpha-galacturonosyltransferase activity[GO:0047262]	Golgi membrane[GO:0000139] ; integral component of membrane[GO:0016021]	map00500:Starch and sucrose metabolism(4-alpha-galacturonosyltransferase[ec:2.4.1.43]) ; map00520:Amino sugar and nucleotide sugar metabolism(4-alpha-galacturonosyltransferase[ec:2.4.1.43])
TR33870|c2_g5_i5	184	160	-0.201634	0.770828	1.07724	No	PREDICTED: mitoferrin-like	Sesamum indicum	NA	NA	NA	NA	NA
TR34132|c2_g1_i6	184	160	-0.201634	0.770828	1.07727	No	NA	NA	NA	NA	NA	NA	NA
TR35371|c2_g1_i3	2306	2020	-0.191037	0.770822	1.07729	No	hypothetical protein MIMGU_mgv1a008579mg	Mimulus guttatus	NA	NA	NA	NA	NA
TR33428|c0_g1_i2	238	208	-0.194378	0.7708	1.07728	No	PREDICTED: bifunctional epoxide hydrolase 2-like	Sesamum indicum	NA	NA	NA	NA	NA
TR39931|c0_g6_i4	766	866	0.177023	0.770757	1.07725	No	PREDICTED: uncharacterized protein LOC105171129	Sesamum indicum	NA	NA	NA	NA	NA
TR33475|c1_g1_i4	2850	2486	-0.197136	0.77073	1.07724	No	hypothetical protein MIMGU_mgv1a008949mg	Mimulus guttatus	NA	NA	NA	NA	NA
TR37602|c0_g5_i1	8290	6972	-0.2498	0.770687	1.0772	No	hypothetical protein MIMGU_mgv1a001101mg	Mimulus guttatus	NA	protein folding[GO:0006457] ; response to stress[GO:0006950]	ATP binding[GO:0005524] ; unfolded protein binding[GO:0051082]	NA	NA
TR33209|c0_g2_i3	1214	1072	-0.179464	0.770676	1.07721	No	PREDICTED: proteasome subunit alpha type-7	Sesamum indicum	NA	NA	NA	NA	NA
TR29687|c0_g6_i1	274	312	0.18737	0.770658	1.07721	No	PREDICTED: uncharacterized protein LOC105168722	Sesamum indicum	NA	NA	NA	NA	NA
TR3817|c0_g3_i7	870	984	0.177643	0.770654	1.07723	No	PREDICTED: serine/threonine-protein phosphatase PP2A catalytic subunit	Sesamum indicum	NA	NA	NA	NA	NA
TR41476|c0_g1_i7	224	256	0.192645	0.770432	1.07695	No	hypothetical protein MIMGU_mgv1a003661mg	Mimulus guttatus	NA	oligopeptide transport[GO:0006857]	transporter activity[GO:0005215]	integral component of membrane[GO:0016021]	NA
TR42323|c1_g9_i1	224	256	0.192645	0.770432	1.07697	No	hypothetical protein JCGZ_26304	Jatropha curcas	NA	NA	NA	NA	NA
TR43910|c0_g2_i1	224	256	0.192645	0.770432	1.077	No	PREDICTED: LOW QUALITY PROTEIN: probably inactive leucine-rich repeat receptor-like protein kinase At3g28040	Sesamum indicum	NA	NA	NA	NA	NA
TR32002|c1_g1_i6	256	224	-0.192645	0.770432	1.07703	No	hypothetical protein MIMGU_mgv1a014871mg	Mimulus guttatus	NA	NA	NA	NA	NA
TR35098|c0_g1_i1	256	224	-0.192645	0.770432	1.07705	No	hypothetical protein MIMGU_mgv1a012191mg	Mimulus guttatus	NA	NA	NA	endoplasmic reticulum membrane[GO:0005789]	NA
TR43656|c1_g2_i3	1698	1494	-0.184656	0.770397	1.07703	No	PREDICTED: nuclear pore complex protein NUP98A	Sesamum indicum	NA	NA	NA	NA	NA
TR36882|c1_g2_i1	422	372	-0.18194	0.770345	1.07698	No	PREDICTED: uncharacterized protein LOC105175270	Sesamum indicum	NA	NA	NA	NA	NA
TR29313|c0_g1_i3	144	166	0.205114	0.77031	1.07714	No	PREDICTED: uncharacterized protein LOC105975028	Erythranthe guttatus	NA	NA	NA	NA	NA
TR35811|c2_g2_i5	144	166	0.205114	0.77031	1.07698	No	PREDICTED: thaumatin-like protein 1b	Sesamum indicum	NA	NA	NA	NA	NA
TR42606|c0_g3_i2	144	166	0.205114	0.77031	1.07701	No	PREDICTED: protein FAR1-RELATED SEQUENCE 6-like	Sesamum indicum	NA	NA	NA	NA	NA
TR34269|c1_g2_i1	166	144	-0.205114	0.77031	1.07704	No	PREDICTED: probable serine/threonine-protein kinase At1g18390	Sesamum indicum	NA	NA	NA	NA	NA
TR36472|c4_g1_i5	166	144	-0.205114	0.77031	1.07706	No	PREDICTED: vesicle-associated protein 1-1	Sesamum indicum	NA	NA	NA	NA	NA
TR39352|c0_g2_i3	166	144	-0.205114	0.77031	1.07709	No	PREDICTED: calcium-dependent protein kinase 8-like	Sesamum indicum	NA	NA	NA	NA	NA
TR43605|c0_g2_i3	166	144	-0.205114	0.77031	1.07711	No	PREDICTED: uncharacterized protein LOC105176680	Sesamum indicum	NA	NA	NA	NA	NA
TR7789|c0_g1_i9	166	144	-0.205114	0.77031	1.07696	No	NA	NA	NA	NA	NA	NA	NA
TR22919|c0_g1_i2	84	98	0.222392	0.770174	1.07703	No	PREDICTED: type II inositol 1,4,5-trisphosphate 5-phosphatase FRA3	Sesamum indicum	NA	NA	NA	NA	NA
TR28014|c0_g1_i1	84	98	0.222392	0.770174	1.07718	No	PREDICTED: nuclear transcription factor Y subunit A-1-like	Sesamum indicum	NA	NA	NA	NA	NA
TR28929|c0_g2_i1	84	98	0.222392	0.770174	1.07697	No	PREDICTED: ethylene-responsive transcription factor RAP2-12-like	Sesamum indicum	NA	NA	NA	NA	NA
TR3530|c0_g2_i7	84	98	0.222392	0.770174	1.07705	No	NA	NA	NA	NA	NA	NA	NA
TR41848|c0_g2_i1	84	98	0.222392	0.770174	1.07708	No	NA	NA	NA	NA	NA	NA	NA
TR43131|c2_g3_i2	84	98	0.222392	0.770174	1.0771	No	cytochrome P450 oxidoreductase	Ocimum basilicum	Lamiaceae	oxidation-reduction process[GO:0055114]	NADPH-hemoprotein reductase activity[GO:0003958] ; iron ion binding[GO:0005506] ; FMN binding[GO:0010181]	endoplasmic reticulum membrane[GO:0005789] ; integral component of membrane[GO:0016021]	NA
TR44776|c0_g1_i3	84	98	0.222392	0.770174	1.07713	No	hypothetical protein MIMGU_mgv1a000110mg	Mimulus guttatus	NA	NA	zinc ion binding[GO:0008270]	NA	NA
TR44789|c0_g1_i3	84	98	0.222392	0.770174	1.07728	No	PREDICTED: abnormal spindle-like microcephaly-associated protein homolog isoform X2	Sesamum indicum	NA	NA	NA	NA	NA
TR33242|c3_g4_i3	98	84	-0.222392	0.770174	1.077	No	NA	NA	NA	NA	NA	NA	NA
TR35922|c0_g1_i6	98	84	-0.222392	0.770174	1.07721	No	NA	NA	NA	NA	NA	NA	NA
TR40806|c0_g2_i4	98	84	-0.222392	0.770174	1.07723	No	PREDICTED: putative wall-associated receptor kinase-like 16	Sesamum indicum	NA	NA	NA	NA	NA
TR42104|c0_g3_i1	98	84	-0.222392	0.770174	1.07726	No	NA	NA	NA	NA	NA	NA	NA
TR44171|c1_g1_i4	98	84	-0.222392	0.770174	1.07715	No	PREDICTED: uncharacterized protein At1g04910	Sesamum indicum	NA	NA	NA	NA	NA
TR36295|c0_g4_i1	620	548	-0.178092	0.770119	1.07723	No	PREDICTED: uncharacterized protein LOC105168251	Sesamum indicum	NA	NA	NA	NA	NA
TR38257|c4_g1_i2	458	404	-0.180992	0.770089	1.07722	No	PREDICTED: serine/threonine-protein phosphatase 6 regulatory subunit 3	Sesamum indicum	NA	NA	NA	NA	NA
TR20899|c0_g2_i1	56	66	0.237039	0.770028	1.07716	No	NA	NA	NA	NA	NA	NA	NA
TR2337|c0_g1_i6	56	66	0.237039	0.770028	1.07755	No	hypothetical protein NitaMp008	Nicotiana tabacum	NA	DNA integration[GO:0015074]	nucleic acid binding[GO:0003676]	mitochondrion[GO:0005739]	NA
TR2406|c0_g1_i1	56	66	0.237039	0.770028	1.07721	No	PREDICTED: BTB/POZ domain-containing protein At1g03010	Sesamum indicum	NA	NA	NA	NA	NA
TR29620|c0_g1_i7	56	66	0.237039	0.770028	1.07724	No	NA	NA	NA	NA	NA	NA	NA
TR3083|c1_g1_i6	56	66	0.237039	0.770028	1.07726	No	NA	NA	NA	NA	NA	NA	NA
TR32297|c0_g8_i2	56	66	0.237039	0.770028	1.07729	No	PREDICTED: vacuolar protein sorting-associated protein 4-like	Sesamum indicum	NA	NA	NA	NA	NA
TR34180|c0_g1_i2	56	66	0.237039	0.770028	1.07731	No	putative plastid-lipid-associated protein 10	Morus notabilis	NA	NA	NA	NA	NA
TR35029|c1_g1_i1	56	66	0.237039	0.770028	1.07734	No	NA	NA	NA	NA	NA	NA	NA
TR38023|c0_g2_i1	56	66	0.237039	0.770028	1.07736	No	ATPase 3	Arabidopsis thaliana	NA	NA	NA	NA	NA
TR39952|c2_g8_i1	56	66	0.237039	0.770028	1.07739	No	PREDICTED: mannose-1-phosphate guanyltransferase alpha-like	Fragaria vesca subsp. vesca	NA	NA	NA	NA	NA
TR41584|c1_g4_i2	56	66	0.237039	0.770028	1.07742	No	PREDICTED: replication protein A 70 kDa DNA-binding subunit B	Sesamum indicum	NA	NA	NA	NA	NA
TR41950|c1_g6_i1	56	66	0.237039	0.770028	1.07744	No	PREDICTED: transcription factor TCP2-like isoform X1	Erythranthe guttatus	NA	NA	NA	NA	NA
TR42708|c0_g1_i4	56	66	0.237039	0.770028	1.07747	No	PREDICTED: LOW QUALITY PROTEIN: uncharacterized protein LOC105155817	Sesamum indicum	NA	NA	NA	NA	NA
TR43428|c0_g1_i1	56	66	0.237039	0.770028	1.07749	No	PREDICTED: protein MEI2-like 5 isoform X2	Erythranthe guttatus	NA	NA	NA	NA	NA
TR43728|c0_g6_i1	56	66	0.237039	0.770028	1.07752	No	NA	NA	NA	NA	NA	NA	NA
TR43817|c1_g1_i3	56	66	0.237039	0.770028	1.07718	No	NA	NA	NA	NA	NA	NA	NA
TR44461|c1_g1_i2	56	66	0.237039	0.770028	1.07757	No	PREDICTED: RNA polymerase-associated protein CTR9 homolog	Sesamum indicum	NA	NA	NA	NA	NA
TR44749|c3_g2_i4	56	66	0.237039	0.770028	1.07796	No	hypothetical protein MIMGU_mgv1a000173mg	Mimulus guttatus	NA	NA	zinc ion binding[GO:0008270]	NA	NA
TR44802|c1_g7_i2	56	66	0.237039	0.770028	1.07762	No	PREDICTED: uncharacterized protein LOC105176476 isoform X2	Sesamum indicum	NA	NA	NA	NA	NA
TR29335|c0_g2_i5	66	56	-0.237039	0.770028	1.0776	No	NA	NA	NA	NA	NA	NA	NA
TR29515|c0_g1_i1	66	56	-0.237039	0.770028	1.07767	No	Dihydrodipicolinate synthase isoform 1	Theobroma cacao	NA	lysine biosynthetic process via diaminopimelate[GO:0009089]	4-hydroxy-tetrahydrodipicolinate synthase[GO:0008840]	NA	map00261:Monobactam biosynthesis(synthase[ec:4.3.3.7]) ; map01130:Biosynthesis of antibiotics(synthase[ec:4.3.3.7]) ; map00300:Lysine biosynthesis(synthase[ec:4.3.3.7])
TR32367|c0_g2_i1	66	56	-0.237039	0.770028	1.0777	No	PREDICTED: ATP-dependent zinc metalloprotease FTSH 2, chloroplastic	Sesamum indicum	NA	NA	NA	NA	NA
TR33759|c0_g2_i1	66	56	-0.237039	0.770028	1.07773	No	PREDICTED: nuclear transcription factor Y subunit C-2	Sesamum indicum	NA	NA	NA	NA	NA
TR34845|c0_g1_i3	66	56	-0.237039	0.770028	1.07775	No	PREDICTED: protein winged eye isoform X2	Elaeis guineensis	NA	NA	NA	NA	NA
TR35838|c1_g4_i9	66	56	-0.237039	0.770028	1.07778	No	PREDICTED: uncharacterized protein LOC105170041	Sesamum indicum	NA	NA	NA	NA	NA
TR37002|c0_g1_i13	66	56	-0.237039	0.770028	1.0778	No	PREDICTED: protein INVOLVED IN DE NOVO 2-like	Sesamum indicum	NA	NA	NA	NA	NA
TR40353|c0_g5_i2	66	56	-0.237039	0.770028	1.07783	No	PREDICTED: splicing factor 3A subunit 3	Sesamum indicum	NA	NA	NA	NA	NA
TR41733|c0_g5_i1	66	56	-0.237039	0.770028	1.07786	No	hypothetical protein MIMGU_mgv1a005709mg	Mimulus guttatus	NA	RNA processing[GO:0006396]	RNA binding[GO:0003723] ; nucleotide binding[GO:0000166]	nucleus[GO:0005634] ; intracellular ribonucleoprotein complex[GO:0030529]	NA
TR42174|c0_g1_i10	66	56	-0.237039	0.770028	1.07788	No	PREDICTED: glucan endo-1,3-beta-glucosidase 1	Sesamum indicum	NA	NA	NA	NA	NA
TR42554|c0_g1_i3	66	56	-0.237039	0.770028	1.07791	No	PREDICTED: golgin candidate 6	Sesamum indicum	NA	NA	NA	NA	NA
TR43122|c1_g6_i1	66	56	-0.237039	0.770028	1.07793	No	PREDICTED: probable inactive receptor-like protein kinase At3g56050	Sesamum indicum	NA	NA	NA	NA	NA
TR44458|c1_g1_i4	66	56	-0.237039	0.770028	1.07801	No	PREDICTED: WD repeat-containing protein 44	Sesamum indicum	NA	NA	NA	NA	NA
TR7455|c0_g1_i2	66	56	-0.237039	0.770028	1.07798	No	NA	NA	NA	NA	NA	NA	NA
TR7765|c0_g1_i2	66	56	-0.237039	0.770028	1.07765	No	PREDICTED: homeobox protein HD1	Sesamum indicum	NA	NA	NA	NA	NA
TR41023|c0_g2_i1	240	274	0.191141	0.770028	1.07804	No	PREDICTED: phospholipase SGR2-like isoform X1	Sesamum indicum	NA	NA	NA	NA	NA
TR43072|c1_g1_i1	240	274	0.191141	0.770028	1.07806	No	PREDICTED: protein phosphatase 2C 29	Sesamum indicum	NA	NA	NA	NA	NA
TR43268|c0_g1_i1	306	348	0.185556	0.770015	1.07807	No	PREDICTED: protein DEK	Sesamum indicum	NA	NA	NA	NA	NA
TR38154|c1_g1_i1	812	718	-0.177496	0.770015	1.07809	No	hypothetical protein MIMGU_mgv1a006302mg	Mimulus guttatus	NA	translational elongation[GO:0006414]	translation elongation factor activity[GO:0003746] ; GTP binding[GO:0005525] ; GTPase activity[GO:0003924]	intracellular[GO:0005622]	NA
TR39787|c0_g3_i1	4078	4742	0.217634	0.770007	1.07811	No	NA	NA	NA	NA	NA	NA	NA
TR35455|c1_g2_i1	420	476	0.180572	0.770004	1.07813	No	PREDICTED: gamma-soluble NSF attachment protein isoform X1	Sesamum indicum	NA	NA	NA	NA	NA
TR4107|c0_g1_i1	420	476	0.180572	0.770004	1.07816	No	PREDICTED: uncharacterized protein LOC105178356	Sesamum indicum	NA	NA	NA	NA	NA
TR41051|c0_g3_i4	566	500	-0.178874	0.769932	1.07808	No	PREDICTED: transmembrane E3 ubiquitin-protein ligase 1	Sesamum indicum	NA	NA	NA	NA	NA
TR38723|c0_g2_i2	530	468	-0.179484	0.769896	1.07806	No	PREDICTED: uncharacterized protein LOC105175116	Sesamum indicum	NA	NA	NA	NA	NA
TR38499|c2_g3_i5	1424	1618	0.184262	0.769818	1.07797	No	PREDICTED: putative UPF0481 protein At3g02645	Sesamum indicum	NA	NA	NA	NA	NA
TR33295|c2_g1_i8	322	366	0.184783	0.769782	1.07795	No	PREDICTED: phosphoglycerate mutase-like protein 1 isoform X2	Sesamum indicum	NA	NA	NA	NA	NA
TR39810|c0_g5_i3	322	366	0.184783	0.769782	1.07798	No	PREDICTED: probable GTP diphosphokinase CRSH, chloroplastic	Sesamum indicum	NA	NA	NA	NA	NA
TR17604|c0_g1_i1	22	26	0.241008	0.769719	1.07869	No	PREDICTED: eukaryotic translation initiation factor 5B	Sesamum indicum	NA	NA	NA	NA	NA
TR17903|c0_g1_i1	22	26	0.241008	0.769719	1.07794	No	hypothetical protein M569_12230, partial	Genlisea aurea	NA	nucleic acid phosphodiester bond hydrolysis[GO:0090305] ; RNA processing[GO:0006396]	nucleic acid binding[GO:0003676] ; 3'-5' exonuclease activity[GO:0008408] ; nucleotide binding[GO:0000166]	nuclear exosome (RNase complex)[GO:0000176]	NA
TR19928|c0_g1_i1	22	26	0.241008	0.769719	1.07796	No	NA	NA	NA	NA	NA	NA	NA
TR2160|c0_g1_i1	22	26	0.241008	0.769719	1.07799	No	PREDICTED: filaggrin-like	Sesamum indicum	NA	NA	NA	NA	NA
TR21863|c0_g1_i1	22	26	0.241008	0.769719	1.07802	No	PREDICTED: exportin-7 isoform X1	Sesamum indicum	NA	NA	NA	NA	NA
TR22249|c0_g1_i4	22	26	0.241008	0.769719	1.07804	No	PREDICTED: AP-3 complex subunit delta isoform X3	Sesamum indicum	NA	NA	NA	NA	NA
TR22330|c0_g1_i2	22	26	0.241008	0.769719	1.07807	No	hypothetical protein MIMGU_mgv1a000460mg	Mimulus guttatus	NA	NA	nucleotide binding[GO:0000166]	cytoskeletal part[GO:0044430] ; microtubule cytoskeleton[GO:0015630]	NA
TR2250|c2_g1_i1	22	26	0.241008	0.769719	1.07809	No	NA	NA	NA	NA	NA	NA	NA
TR22923|c0_g1_i1	22	26	0.241008	0.769719	1.07812	No	PREDICTED: transcription factor LHW-like	Erythranthe guttatus	NA	NA	NA	NA	NA
TR23510|c0_g1_i2	22	26	0.241008	0.769719	1.07815	No	hypothetical protein MIMGU_mgv1a003564mg	Mimulus guttatus	NA	NA	NA	NA	NA
TR23712|c0_g2_i1	22	26	0.241008	0.769719	1.07817	No	NA	NA	NA	NA	NA	NA	NA
TR23784|c0_g1_i1	22	26	0.241008	0.769719	1.0782	No	PREDICTED: 125 kDa kinesin-related protein-like	Sesamum indicum	NA	NA	NA	NA	NA
TR24007|c0_g5_i1	22	26	0.241008	0.769719	1.07822	No	PREDICTED: ubiquitin carboxyl-terminal hydrolase 19-like	Sesamum indicum	NA	NA	NA	NA	NA
TR25070|c0_g1_i1	22	26	0.241008	0.769719	1.07825	No	hypothetical protein MIMGU_mgv1a014481mg	Mimulus guttatus	NA	NA	NA	integral component of membrane[GO:0016021]	NA
TR25544|c1_g1_i3	22	26	0.241008	0.769719	1.07828	No	NA	NA	NA	NA	NA	NA	NA
TR25614|c0_g1_i2	22	26	0.241008	0.769719	1.0783	No	NA	NA	NA	NA	NA	NA	NA
TR25662|c0_g1_i1	22	26	0.241008	0.769719	1.07833	No	PREDICTED: digalactosyldiacylglycerol synthase 2, chloroplastic isoform X1	Sesamum indicum	NA	NA	NA	NA	NA
TR25955|c0_g2_i2	22	26	0.241008	0.769719	1.07835	No	PREDICTED: uncharacterized protein LOC105173611 isoform X1	Sesamum indicum	NA	NA	NA	NA	NA
TR26107|c0_g1_i3	22	26	0.241008	0.769719	1.07838	No	PREDICTED: EID1-like F-box protein 2 isoform X1	Sesamum indicum	NA	NA	NA	NA	NA
TR26353|c0_g2_i1	22	26	0.241008	0.769719	1.0784	No	PREDICTED: dihydrolipoyllysine-residue acetyltransferase component 5 of pyruvate dehydrogenase complex, chloroplastic	Sesamum indicum	NA	NA	NA	NA	NA
TR28144|c0_g2_i1	22	26	0.241008	0.769719	1.07843	No	PREDICTED: kinesin-related protein 11 isoform X2	Sesamum indicum	NA	NA	NA	NA	NA
TR28311|c0_g1_i3	22	26	0.241008	0.769719	1.07846	No	NA	NA	NA	NA	NA	NA	NA
TR28762|c0_g1_i1	22	26	0.241008	0.769719	1.07848	No	NA	NA	NA	NA	NA	NA	NA
TR2888|c0_g4_i2	22	26	0.241008	0.769719	1.07851	No	hypothetical protein MIMGU_mgv1a0128271mg, partial	Mimulus guttatus	NA	NA	NA	NA	NA
TR28924|c0_g1_i2	22	26	0.241008	0.769719	1.07853	No	PREDICTED: mitogen-activated protein kinase 9-like	Sesamum indicum	NA	NA	NA	NA	NA
TR30928|c0_g1_i1	22	26	0.241008	0.769719	1.07856	No	PREDICTED: alanyl-tRNA editing protein Aarsd1	Sesamum indicum	NA	NA	NA	NA	NA
TR30961|c0_g1_i7	22	26	0.241008	0.769719	1.07859	No	hypothetical protein MIMGU_mgv1a019699mg	Mimulus guttatus	NA	NA	NA	integral component of membrane[GO:0016021]	NA
TR31068|c0_g2_i1	22	26	0.241008	0.769719	1.07861	No	putative clathrin heavy chain family protein	Zea mays	NA	vesicle-mediated transport[GO:0016192] ; intracellular protein transport[GO:0006886]	structural molecule activity[GO:0005198]	integral component of membrane[GO:0016021] ; clathrin coat of coated pit[GO:0030132] ; clathrin coat of trans-Golgi network vesicle[GO:0030130]	NA
TR31675|c0_g1_i3	22	26	0.241008	0.769719	1.07864	No	PREDICTED: uncharacterized protein LOC105172857	Sesamum indicum	NA	NA	NA	NA	NA
TR32194|c0_g1_i1	22	26	0.241008	0.769719	1.07866	No	PREDICTED: uncharacterized protein At4g00950-like	Erythranthe guttatus	NA	NA	NA	NA	NA
TR32200|c0_g5_i1	22	26	0.241008	0.769719	1.07791	No	PREDICTED: transcription factor UNE12-like	Populus euphratica	NA	NA	NA	NA	NA
TR32702|c0_g5_i2	22	26	0.241008	0.769719	1.07872	No	NA	NA	NA	NA	NA	NA	NA
TR32953|c1_g7_i1	22	26	0.241008	0.769719	1.07874	No	NA	NA	NA	NA	NA	NA	NA
TR33420|c0_g3_i3	22	26	0.241008	0.769719	1.07877	No	NA	NA	NA	NA	NA	NA	NA
TR33812|c0_g1_i2	22	26	0.241008	0.769719	1.07879	No	PREDICTED: uncharacterized protein LOC104244326	Nicotiana sylvestris	NA	NA	NA	NA	NA
TR33819|c1_g1_i4	22	26	0.241008	0.769719	1.07882	No	manganese tolerance protein 2	Beta vulgaris subsp. maritima	NA	cation transmembrane transport[GO:0098655]	cation transmembrane transporter activity[GO:0008324]	integral component of membrane[GO:0016021]	NA
TR34194|c0_g2_i9	22	26	0.241008	0.769719	1.07884	No	hypothetical protein MIMGU_mgv1a013069mg	Mimulus guttatus	NA	NA	NA	membrane[GO:0016020]	NA
TR34506|c0_g2_i1	22	26	0.241008	0.769719	1.07887	No	NA	NA	NA	NA	NA	NA	NA
TR34565|c2_g5_i1	22	26	0.241008	0.769719	1.0789	No	PREDICTED: telomere repeat-binding factor 4-like isoform X2	Sesamum indicum	NA	NA	NA	NA	NA
TR35086|c0_g1_i4	22	26	0.241008	0.769719	1.07892	No	PREDICTED: F-box protein At1g61340-like	Sesamum indicum	NA	NA	NA	NA	NA
TR35769|c0_g2_i1	22	26	0.241008	0.769719	1.07895	No	hypothetical protein MIMGU_mgv1a008080mg	Mimulus guttatus	NA	protein phosphorylation[GO:0006468]	protein kinase activity[GO:0004672] ; ATP binding[GO:0005524]	NA	NA
TR36012|c0_g1_i3	22	26	0.241008	0.769719	1.07897	No	PREDICTED: microtubule-associated protein RP/EB family member 1C	Sesamum indicum	NA	NA	NA	NA	NA
TR36028|c0_g1_i4	22	26	0.241008	0.769719	1.079	No	hypothetical protein MIMGU_mgv1a011779mg	Mimulus guttatus	NA	NA	nucleic acid binding[GO:0003676] ; nucleotide binding[GO:0000166]	NA	NA
TR36120|c1_g1_i1	22	26	0.241008	0.769719	1.07903	No	NA	NA	NA	NA	NA	NA	NA
TR36820|c0_g2_i1	22	26	0.241008	0.769719	1.07905	No	NA	NA	NA	NA	NA	NA	NA
TR37011|c0_g6_i2	22	26	0.241008	0.769719	1.07908	No	PREDICTED: uncharacterized protein LOC105175002 isoform X2	Sesamum indicum	NA	NA	NA	NA	NA
TR37635|c0_g3_i4	22	26	0.241008	0.769719	1.0791	No	unnamed protein product	Coffea canephora	NA	NA	metal ion binding[GO:0046872]	NA	NA
TR37640|c0_g2_i1	22	26	0.241008	0.769719	1.07913	No	PREDICTED: MLO-like protein 6	Sesamum indicum	NA	NA	NA	NA	NA
TR37909|c0_g2_i1	22	26	0.241008	0.769719	1.07916	No	NA	NA	NA	NA	NA	NA	NA
TR37936|c0_g2_i1	22	26	0.241008	0.769719	1.07918	No	hypothetical protein MIMGU_mgv1a010300mg	Mimulus guttatus	NA	multicellular organismal development[GO:0007275] ; protein ubiquitination[GO:0016567] ; ubiquitin-dependent protein catabolic process[GO:0006511]	ligase activity[GO:0016874] ; ubiquitin-protein transferase activity[GO:0004842] ; zinc ion binding[GO:0008270]	nucleus[GO:0005634]	NA
TR37957|c0_g3_i1	22	26	0.241008	0.769719	1.07921	No	PREDICTED: probable LRR receptor-like serine/threonine-protein kinase At1g63430 isoform X2	Sesamum indicum	NA	NA	NA	NA	NA
TR37993|c1_g2_i9	22	26	0.241008	0.769719	1.07923	No	PREDICTED: probable serine/threonine-protein kinase Cx32, chloroplastic isoform X2	Sesamum indicum	NA	NA	NA	NA	NA
TR38380|c0_g1_i2	22	26	0.241008	0.769719	1.07926	No	PREDICTED: protein PMR5-like	Sesamum indicum	NA	NA	NA	NA	NA
TR38470|c0_g1_i1	22	26	0.241008	0.769719	1.07929	No	hypothetical protein GLYMA_15G089500	Glycine max	NA	NA	NA	NA	NA
TR3849|c0_g1_i5	22	26	0.241008	0.769719	1.07931	No	NA	NA	NA	NA	NA	NA	NA
TR38625|c0_g1_i1	22	26	0.241008	0.769719	1.07934	No	hypothetical protein MIMGU_mgv1a009556mg	Mimulus guttatus	NA	NA	NA	NA	NA
TR38690|c0_g2_i1	22	26	0.241008	0.769719	1.07936	No	unnamed protein product	Coffea canephora	NA	NA	NA	NA	NA
TR38821|c1_g6_i1	22	26	0.241008	0.769719	1.07939	No	PREDICTED: probable WRKY transcription factor 2 isoform X2	Sesamum indicum	NA	NA	NA	NA	NA
TR39111|c0_g2_i1	22	26	0.241008	0.769719	1.07941	No	hypothetical protein MIMGU_mgv1a010165mg	Mimulus guttatus	NA	NA	zinc ion binding[GO:0008270] ; nucleic acid binding[GO:0003676]	NA	NA
TR39159|c0_g3_i1	22	26	0.241008	0.769719	1.07944	No	NA	NA	NA	NA	NA	NA	NA
TR39332|c1_g9_i3	22	26	0.241008	0.769719	1.07947	No	PREDICTED: tankyrase-1	Nicotiana tomentosiformis	NA	NA	NA	NA	NA
TR39608|c0_g10_i6	22	26	0.241008	0.769719	1.07949	No	PREDICTED: vesicle-associated protein 2-2-like	Sesamum indicum	NA	NA	NA	NA	NA
TR39667|c1_g2_i3	22	26	0.241008	0.769719	1.07952	No	hypothetical protein MIMGU_mgv1a005600mg	Mimulus guttatus	NA	proteolysis[GO:0006508]	serine-type carboxypeptidase activity[GO:0004185]	NA	NA
TR39689|c1_g2_i2	22	26	0.241008	0.769719	1.07954	No	NA	NA	NA	NA	NA	NA	NA
TR40934|c1_g6_i1	22	26	0.241008	0.769719	1.07957	No	NA	NA	NA	NA	NA	NA	NA
TR41023|c0_g2_i2	22	26	0.241008	0.769719	1.0796	No	PREDICTED: phospholipase SGR2-like isoform X1	Sesamum indicum	NA	NA	NA	NA	NA
TR41208|c0_g3_i1	22	26	0.241008	0.769719	1.07962	No	PREDICTED: protein FLX-like 2	Sesamum indicum	NA	NA	NA	NA	NA
TR41295|c0_g2_i1	22	26	0.241008	0.769719	1.07965	No	PREDICTED: probable pre-mRNA-splicing factor ATP-dependent RNA helicase	Sesamum indicum	NA	NA	NA	NA	NA
TR41306|c0_g3_i2	22	26	0.241008	0.769719	1.07967	No	PREDICTED: solute carrier family 40 member 3, chloroplastic isoform X2	Sesamum indicum	NA	NA	NA	NA	NA
TR41582|c0_g3_i2	22	26	0.241008	0.769719	1.0797	No	PREDICTED: uncharacterized protein LOC105165456	Sesamum indicum	NA	NA	NA	NA	NA
TR41661|c0_g5_i1	22	26	0.241008	0.769719	1.07973	No	PREDICTED: mitogen-activated protein kinase homolog MMK2-like	Sesamum indicum	NA	NA	NA	NA	NA
TR41708|c0_g4_i1	22	26	0.241008	0.769719	1.07975	No	PREDICTED: uncharacterized protein LOC105157667 isoform X4	Sesamum indicum	NA	NA	NA	NA	NA
TR41863|c1_g4_i1	22	26	0.241008	0.769719	1.07978	No	NA	NA	NA	NA	NA	NA	NA
TR41900|c1_g2_i1	22	26	0.241008	0.769719	1.0798	No	PREDICTED: 2-isopropylmalate synthase A-like	Sesamum indicum	NA	NA	NA	NA	NA
TR41913|c1_g2_i1	22	26	0.241008	0.769719	1.07983	No	PREDICTED: LOW QUALITY PROTEIN: uncharacterized protein LOC105157816	Sesamum indicum	NA	NA	NA	NA	NA
TR42388|c0_g3_i1	22	26	0.241008	0.769719	1.07986	No	PREDICTED: protein trichome berefringence-like 7	Sesamum indicum	NA	NA	NA	NA	NA
TR42428|c0_g5_i1	22	26	0.241008	0.769719	1.07988	No	NA	NA	NA	NA	NA	NA	NA
TR42453|c0_g2_i1	22	26	0.241008	0.769719	1.07991	No	hypothetical protein MIMGU_mgv1a005940mg	Mimulus guttatus	NA	regulation of transcription, DNA-templated[GO:0006355] ; histone H3 deacetylation[GO:0070932] ; transcription, DNA-templated[GO:0006351]	NAD-dependent histone deacetylase activity (H3-K14 specific)[GO:0032041]	nucleus[GO:0005634]	NA
TR42557|c1_g1_i2	22	26	0.241008	0.769719	1.07993	No	PREDICTED: CTP synthase	Sesamum indicum	NA	NA	NA	NA	NA
TR43273|c0_g9_i3	22	26	0.241008	0.769719	1.07996	No	PREDICTED: NPL4-like protein 2	Sesamum indicum	NA	NA	NA	NA	NA
TR43364|c0_g1_i1	22	26	0.241008	0.769719	1.07999	No	NA	NA	NA	NA	NA	NA	NA
TR43636|c0_g2_i1	22	26	0.241008	0.769719	1.08001	No	PREDICTED: serine/threonine-protein kinase D6PK	Sesamum indicum	NA	NA	NA	NA	NA
TR44303|c0_g6_i2	22	26	0.241008	0.769719	1.08004	No	NA	NA	NA	NA	NA	NA	NA
TR44342|c0_g1_i4	22	26	0.241008	0.769719	1.08006	No	PREDICTED: uncharacterized protein LOC105956308	Erythranthe guttatus	NA	NA	NA	NA	NA
TR44427|c2_g1_i3	22	26	0.241008	0.769719	1.08009	No	PREDICTED: uncharacterized protein LOC105165714	Sesamum indicum	NA	NA	NA	NA	NA
TR44475|c1_g2_i1	22	26	0.241008	0.769719	1.08012	No	PREDICTED: uncharacterized protein LOC104609583 isoform X1	Nelumbo nucifera	NA	NA	NA	NA	NA
TR44646|c0_g2_i2	22	26	0.241008	0.769719	1.08014	No	PREDICTED: LOW QUALITY PROTEIN: UDP-glucose:glycoprotein glucosyltransferase	Sesamum indicum	NA	NA	NA	NA	NA
TR44683|c2_g2_i1	22	26	0.241008	0.769719	1.08017	No	PREDICTED: FACT complex subunit SPT16-like	Sesamum indicum	NA	NA	NA	NA	NA
TR44825|c1_g2_i1	22	26	0.241008	0.769719	1.08019	No	hypothetical protein CISIN_1g0219391mg, partial	Citrus sinensis	NA	metabolic process[GO:0008152]	hydrolase activity[GO:0016787]	NA	NA
TR4826|c0_g1_i1	22	26	0.241008	0.769719	1.08022	No	40S ribosomal protein S3	Theobroma cacao	NA	translation[GO:0006412]	structural constituent of ribosome[GO:0003735] ; RNA binding[GO:0003723]	ribosome[GO:0005840]	NA
TR7473|c0_g1_i6	22	26	0.241008	0.769719	1.08024	No	PREDICTED: MYB-like transcription factor ETC3	Sesamum indicum	NA	NA	NA	NA	NA
TR7862|c0_g5_i1	22	26	0.241008	0.769719	1.08027	No	PREDICTED: aspartic proteinase PCS1-like	Sesamum indicum	NA	NA	NA	NA	NA
TR8131|c1_g2_i1	22	26	0.241008	0.769719	1.0803	No	PREDICTED: uncharacterized protein LOC105172725 isoform X2	Sesamum indicum	NA	NA	NA	NA	NA
TR8209|c1_g3_i3	22	26	0.241008	0.769719	1.08032	No	PREDICTED: splicing factor U2af large subunit A-like isoform X7	Malus domestica	NA	NA	NA	NA	NA
TR8236|c2_g4_i4	22	26	0.241008	0.769719	1.08035	No	NA	NA	NA	NA	NA	NA	NA
TR8987|c0_g1_i1	22	26	0.241008	0.769719	1.08037	No	PREDICTED: putative glucose-6-phosphate 1-epimerase	Sesamum indicum	NA	NA	NA	NA	NA
TR19779|c0_g1_i1	26	22	-0.241008	0.769719	1.0804	No	hypothetical protein MIMGU_mgv1a006439mg	Mimulus guttatus	NA	NA	zinc ion binding[GO:0008270]	intracellular[GO:0005622]	NA
TR20378|c0_g1_i3	26	22	-0.241008	0.769719	1.08043	No	NA	NA	NA	NA	NA	NA	NA
TR21347|c0_g1_i1	26	22	-0.241008	0.769719	1.08045	No	PREDICTED: topless-related protein 3-like	Sesamum indicum	NA	NA	NA	NA	NA
TR22324|c0_g3_i1	26	22	-0.241008	0.769719	1.08048	No	NA	NA	NA	NA	NA	NA	NA
TR2525|c0_g1_i1	26	22	-0.241008	0.769719	1.0805	No	PREDICTED: ethanolamine-phosphate cytidylyltransferase	Sesamum indicum	NA	NA	NA	NA	NA
TR2562|c0_g8_i2	26	22	-0.241008	0.769719	1.08053	No	PREDICTED: UDP-N-acetylglucosamine transferase subunit ALG13 homolog	Sesamum indicum	NA	NA	NA	NA	NA
TR2789|c1_g4_i1	26	22	-0.241008	0.769719	1.08056	No	NA	NA	NA	NA	NA	NA	NA
TR2866|c0_g1_i4	26	22	-0.241008	0.769719	1.08058	No	NA	NA	NA	NA	NA	NA	NA
TR30840|c0_g2_i1	26	22	-0.241008	0.769719	1.08061	No	BnaA08g07400D	Brassica napus	NA	NA	NA	NA	NA
TR30842|c0_g5_i5	26	22	-0.241008	0.769719	1.08204	No	NA	NA	NA	NA	NA	NA	NA
TR31611|c0_g3_i1	26	22	-0.241008	0.769719	1.08066	No	NA	NA	NA	NA	NA	NA	NA
TR31795|c0_g1_i4	26	22	-0.241008	0.769719	1.08069	No	NA	NA	NA	NA	NA	NA	NA
TR33176|c0_g2_i4	26	22	-0.241008	0.769719	1.08071	No	NA	NA	NA	NA	NA	NA	NA
TR33673|c0_g4_i3	26	22	-0.241008	0.769719	1.08074	No	PREDICTED: ATPase family AAA domain-containing protein 1	Sesamum indicum	NA	NA	NA	NA	NA
TR34323|c0_g2_i4	26	22	-0.241008	0.769719	1.08076	No	PREDICTED: cell differentiation protein RCD1 homolog	Sesamum indicum	NA	NA	NA	NA	NA
TR34388|c0_g2_i2	26	22	-0.241008	0.769719	1.08079	No	PREDICTED: 60S ribosomal protein L18a-like protein	Sesamum indicum	NA	NA	NA	NA	NA
TR34461|c0_g1_i1	26	22	-0.241008	0.769719	1.08082	No	NA	NA	NA	NA	NA	NA	NA
TR34863|c0_g3_i6	26	22	-0.241008	0.769719	1.08084	No	NA	NA	NA	NA	NA	NA	NA
TR34881|c2_g9_i3	26	22	-0.241008	0.769719	1.08087	No	NA	NA	NA	NA	NA	NA	NA
TR35969|c0_g3_i1	26	22	-0.241008	0.769719	1.08089	No	NA	NA	NA	NA	NA	NA	NA
TR36392|c0_g1_i1	26	22	-0.241008	0.769719	1.08092	No	NA	NA	NA	NA	NA	NA	NA
TR36457|c0_g2_i1	26	22	-0.241008	0.769719	1.08095	No	PREDICTED: uncharacterized protein LOC102629700	Citrus sinensis	NA	NA	NA	NA	NA
TR37588|c1_g3_i1	26	22	-0.241008	0.769719	1.08097	No	PREDICTED: uncharacterized protein LOC105160598	Sesamum indicum	NA	NA	NA	NA	NA
TR38177|c0_g10_i1	26	22	-0.241008	0.769719	1.081	No	hypothetical protein MIMGU_mgv1a009211mg	Mimulus guttatus	NA	carbohydrate metabolic process[GO:0005975]	carbohydrate binding[GO:0030246] ; catalytic activity[GO:0003824]	NA	NA
TR38239|c2_g1_i5	26	22	-0.241008	0.769719	1.08102	No	PREDICTED: EID1-like F-box protein 2 isoform X2	Sesamum indicum	NA	NA	NA	NA	NA
TR38335|c0_g5_i1	26	22	-0.241008	0.769719	1.08105	No	hypothetical protein MIMGU_mgv1a007150mg	Mimulus guttatus	NA	nucleosome assembly[GO:0006334]	DNA binding[GO:0003677]	nucleosome[GO:0000786] ; nucleus[GO:0005634]	NA
TR38394|c0_g3_i1	26	22	-0.241008	0.769719	1.08108	No	NA	NA	NA	NA	NA	NA	NA
TR38580|c0_g1_i4	26	22	-0.241008	0.769719	1.0811	No	hypothetical protein MIMGU_mgv1a009595mg	Mimulus guttatus	NA	transmembrane transport[GO:0055085]	NA	integral component of membrane[GO:0016021]	NA
TR39352|c0_g1_i1	26	22	-0.241008	0.769719	1.08113	No	NA	NA	NA	NA	NA	NA	NA
TR39378|c0_g11_i1	26	22	-0.241008	0.769719	1.08115	No	hypothetical protein B456_008G064300	Gossypium raimondii	NA	NA	NA	integral component of membrane[GO:0016021]	NA
TR39570|c0_g2_i6	26	22	-0.241008	0.769719	1.08118	No	carotenoid cleavage dioxygenase 4	Scutellaria baicalensis	Lamiaceae	NA	NA	NA	NA
TR39999|c0_g1_i1	26	22	-0.241008	0.769719	1.08121	No	hypothetical protein CICLE_v10004678mg	Citrus clementina	NA	metabolic process[GO:0008152]	transferase activity, transferring glycosyl groups[GO:0016757]	NA	NA
TR40628|c1_g5_i1	26	22	-0.241008	0.769719	1.08123	No	NA	NA	NA	NA	NA	NA	NA
TR40705|c3_g6_i7	26	22	-0.241008	0.769719	1.08126	No	PREDICTED: uncharacterized protein LOC105976181	Erythranthe guttatus	NA	NA	NA	NA	NA
TR40727|c1_g1_i6	26	22	-0.241008	0.769719	1.08128	No	NA	NA	NA	NA	NA	NA	NA
TR40776|c0_g1_i2	26	22	-0.241008	0.769719	1.08131	No	NA	NA	NA	NA	NA	NA	NA
TR40801|c0_g3_i3	26	22	-0.241008	0.769719	1.08134	No	PREDICTED: LOW QUALITY PROTEIN: APO protein 4, mitochondrial	Sesamum indicum	NA	NA	NA	NA	NA
TR40877|c0_g3_i1	26	22	-0.241008	0.769719	1.08136	No	PREDICTED: THO complex subunit 1	Sesamum indicum	NA	NA	NA	NA	NA
TR41648|c2_g5_i1	26	22	-0.241008	0.769719	1.08139	No	PREDICTED: uncharacterized protein LOC105170752	Sesamum indicum	NA	NA	NA	NA	NA
TR41800|c0_g5_i4	26	22	-0.241008	0.769719	1.08141	No	hypothetical protein ARALYDRAFT_898762	Arabidopsis lyrata subsp. lyrata	NA	NA	NA	NA	NA
TR42065|c1_g3_i2	26	22	-0.241008	0.769719	1.08144	No	NA	NA	NA	NA	NA	NA	NA
TR42208|c1_g11_i2	26	22	-0.241008	0.769719	1.08147	No	NA	NA	NA	NA	NA	NA	NA
TR42333|c0_g1_i10	26	22	-0.241008	0.769719	1.08149	No	NA	NA	NA	NA	NA	NA	NA
TR42409|c0_g1_i2	26	22	-0.241008	0.769719	1.08152	No	PREDICTED: proline-rich receptor-like protein kinase PERK3 isoform X3	Sesamum indicum	NA	NA	NA	NA	NA
TR42515|c0_g1_i1	26	22	-0.241008	0.769719	1.08154	No	SQUAMOSA promoter binding protein-like 1, partial	Salvia miltiorrhiza	NA	NA	DNA binding[GO:0003677]	nucleus[GO:0005634]	NA
TR42536|c0_g6_i3	26	22	-0.241008	0.769719	1.08157	No	PREDICTED: tRNA(His) guanylyltransferase 1-like	Sesamum indicum	NA	NA	NA	NA	NA
TR42744|c0_g1_i1	26	22	-0.241008	0.769719	1.0816	No	NA	NA	NA	NA	NA	NA	NA
TR42933|c0_g3_i4	26	22	-0.241008	0.769719	1.08162	No	PREDICTED: beta-galactosidase 8-like	Sesamum indicum	NA	NA	NA	NA	NA
TR43394|c1_g9_i1	26	22	-0.241008	0.769719	1.08165	No	PREDICTED: uncharacterized protein LOC105178397	Sesamum indicum	NA	NA	NA	NA	NA
TR43659|c2_g11_i1	26	22	-0.241008	0.769719	1.08167	No	PREDICTED: uncharacterized protein LOC105167832	Sesamum indicum	NA	NA	NA	NA	NA
TR43789|c0_g1_i1	26	22	-0.241008	0.769719	1.0817	No	NA	NA	NA	NA	NA	NA	NA
TR44027|c0_g4_i1	26	22	-0.241008	0.769719	1.08173	No	NA	NA	NA	NA	NA	NA	NA
TR44051|c2_g3_i2	26	22	-0.241008	0.769719	1.08175	No	hypothetical protein MIMGU_mgv1a018253mg	Mimulus guttatus	NA	NA	NA	NA	NA
TR44242|c2_g2_i1	26	22	-0.241008	0.769719	1.08178	No	unnamed protein product	Vitis vinifera	NA	NA	NA	NA	NA
TR44398|c2_g4_i2	26	22	-0.241008	0.769719	1.0818	No	PREDICTED: uncharacterized protein LOC105174401 isoform X2	Sesamum indicum	NA	NA	NA	NA	NA
TR44452|c0_g5_i1	26	22	-0.241008	0.769719	1.08183	No	PREDICTED: leucine-rich repeat receptor-like serine/threonine-protein kinase BAM3	Sesamum indicum	NA	NA	NA	NA	NA
TR44555|c2_g14_i1	26	22	-0.241008	0.769719	1.08186	No	hypothetical protein MIMGU_mgv1a000811mg	Mimulus guttatus	NA	NA	NA	NA	NA
TR44800|c3_g1_i2	26	22	-0.241008	0.769719	1.08188	No	NA	NA	NA	NA	NA	NA	NA
TR7253|c0_g2_i1	26	22	-0.241008	0.769719	1.08191	No	PREDICTED: ubiquitin carboxyl-terminal hydrolase 12 isoform X1	Sesamum indicum	NA	NA	NA	NA	NA
TR7432|c0_g1_i2	26	22	-0.241008	0.769719	1.08194	No	PREDICTED: CUGBP Elav-like family member 3	Sesamum indicum	NA	NA	NA	NA	NA
TR7506|c0_g1_i4	26	22	-0.241008	0.769719	1.08196	No	NA	NA	NA	NA	NA	NA	NA
TR7513|c0_g1_i2	26	22	-0.241008	0.769719	1.08199	No	PREDICTED: chaperone protein ClpD, chloroplastic	Sesamum indicum	NA	NA	NA	NA	NA
TR8033|c0_g2_i2	26	22	-0.241008	0.769719	1.08201	No	PREDICTED: rop guanine nucleotide exchange factor 7-like isoform X1	Sesamum indicum	NA	NA	NA	NA	NA
TR8131|c1_g1_i12	26	22	-0.241008	0.769719	1.08063	No	PREDICTED: uncharacterized protein LOC105169559	Sesamum indicum	NA	NA	NA	NA	NA
TR32196|c0_g5_i2	2934	2556	-0.198981	0.769675	1.082	No	PREDICTED: putative lactoylglutathione lyase	Sesamum indicum	NA	NA	NA	NA	NA
TR31068|c0_g3_i1	256	292	0.189825	0.769632	1.08197	No	hypothetical protein M569_12138, partial	Genlisea aurea	NA	vesicle-mediated transport[GO:0016192] ; intracellular protein transport[GO:0006886]	structural molecule activity[GO:0005198]	clathrin coat of coated pit[GO:0030132] ; clathrin coat of trans-Golgi network vesicle[GO:0030130]	NA
TR38302|c0_g1_i1	292	256	-0.189825	0.769632	1.082	No	hypothetical protein M569_03201, partial	Genlisea aurea	NA	NA	NA	integral component of membrane[GO:0016021]	NA
TR31774|c2_g4_i1	578	654	0.178221	0.769603	1.08198	No	PREDICTED: 60S ribosomal protein L18-2	Sesamum indicum	NA	NA	NA	NA	NA
TR33443|c0_g2_i1	338	384	0.184083	0.769584	1.08198	No	PREDICTED: probable fructose-bisphosphate aldolase 3, chloroplastic	Sesamum indicum	NA	NA	NA	NA	NA
TR41167|c1_g5_i2	338	384	0.184083	0.769584	1.08201	No	PREDICTED: uncharacterized protein LOC105157171 isoform X1	Sesamum indicum	NA	NA	NA	NA	NA
TR36620|c1_g1_i4	384	338	-0.184083	0.769584	1.08203	No	PREDICTED: ethylene-responsive transcription factor ERF118-like	Sesamum indicum	NA	NA	NA	NA	NA
TR34082|c0_g1_i3	4166	3596	-0.21227	0.769491	1.08193	No	PREDICTED: ribulose-phosphate 3-epimerase, chloroplastic	Sesamum indicum	NA	NA	NA	NA	NA
TR36325|c0_g1_i3	128	148	0.209453	0.769476	1.08193	No	hypothetical protein MIMGU_mgv1a003851mg	Mimulus guttatus	NA	steroid biosynthetic process[GO:0006694] ; oxidation-reduction process[GO:0055114]	3-beta-hydroxy-delta5-steroid dehydrogenase activity[GO:0003854]	endoplasmic reticulum membrane[GO:0005789] ; integral component of membrane[GO:0016021]	map00984:Steroid degradation(dehydrogenase[ec:1.1.1.145]) ; map00140:Steroid hormone biosynthesis(dehydrogenase[ec:1.1.1.145])
TR43014|c4_g3_i6	128	148	0.209453	0.769476	1.08196	No	cytokinin binding protein CBP57	Nicotiana sylvestris	NA	one-carbon metabolic process[GO:0006730]	adenosylhomocysteinase activity[GO:0004013]	NA	map00270:Cysteine and methionine metabolism(S-adenosylhomocysteine synthase[ec:3.3.1.1])
TR37411|c0_g7_i1	1508	1328	-0.183381	0.769459	1.08196	No	hydroxypyruvate reductase	Solenostemon scutellarioides	NA	oxidation-reduction process[GO:0055114]	NAD binding[GO:0051287] ; glycerate dehydrogenase activity[GO:0008465]	NA	map00260:Glycine, serine and threonine metabolism(dehydrogenase[ec:1.1.1.29]) ; map00630:Glyoxylate and dicarboxylate metabolism(dehydrogenase[ec:1.1.1.29]) ; map01130:Biosynthesis of antibiotics(dehydrogenase[ec:1.1.1.29]) ; map00680:Methane metabolism(dehydrogenase[ec:1.1.1.29])
TR31418|c1_g1_i5	354	402	0.183446	0.769419	1.08193	No	PREDICTED: uncharacterized protein LOC105164773	Sesamum indicum	NA	NA	NA	NA	NA
TR41908|c0_g3_i3	624	706	0.178122	0.769377	1.0819	No	PREDICTED: AP2-associated protein kinase 1 isoform X1	Sesamum indicum	NA	NA	NA	NA	NA
TR30171|c0_g4_i2	98	114	0.21818	0.769306	1.08221	No	Aux/IAA protein	Vitis vinifera	NA	cellular process[GO:0009987] ; regulation of cellular process[GO:0050794]	NA	NA	NA
TR32847|c0_g1_i1	98	114	0.21818	0.769306	1.08185	No	NA	NA	NA	NA	NA	NA	NA
TR40033|c1_g1_i5	98	114	0.21818	0.769306	1.08188	No	PREDICTED: protein NRT1/ PTR FAMILY 6.4	Sesamum indicum	NA	NA	NA	NA	NA
TR40550|c0_g1_i2	98	114	0.21818	0.769306	1.0819	No	PREDICTED: V-type proton ATPase subunit B1-like	Brassica napus	NA	NA	NA	NA	NA
TR41640|c0_g4_i1	98	114	0.21818	0.769306	1.08193	No	unnamed protein product	Coffea canephora	NA	fatty acid biosynthetic process[GO:0006633]	transferase activity, transferring acyl groups other than amino-acyl groups[GO:0016747]	integral component of membrane[GO:0016021]	NA
TR42927|c1_g2_i2	98	114	0.21818	0.769306	1.08195	No	hypothetical protein MIMGU_mgv1a005757mg	Mimulus guttatus	NA	protein dephosphorylation[GO:0006470]	protein serine/threonine phosphatase activity[GO:0004722]	NA	NA
TR43997|c1_g1_i3	98	114	0.21818	0.769306	1.08198	No	PREDICTED: plasma membrane ATPase 4-like	Sesamum indicum	NA	NA	NA	NA	NA
TR44744|c0_g2_i4	98	114	0.21818	0.769306	1.08201	No	NA	NA	NA	NA	NA	NA	NA
TR44825|c2_g4_i1	98	114	0.21818	0.769306	1.08203	No	PREDICTED: protein LONGIFOLIA 2-like	Sesamum indicum	NA	NA	NA	NA	NA
TR8159|c0_g1_i5	98	114	0.21818	0.769306	1.08206	No	PREDICTED: BAG family molecular chaperone regulator 4-like	Sesamum indicum	NA	NA	NA	NA	NA
TR30788|c4_g1_i4	114	98	-0.21818	0.769306	1.08208	No	PREDICTED: truncated transcription factor CAULIFLOWER A	Sesamum indicum	NA	NA	NA	NA	NA
TR33403|c0_g7_i1	114	98	-0.21818	0.769306	1.08211	No	PREDICTED: uncharacterized protein LOC105161197	Sesamum indicum	NA	NA	NA	NA	NA
TR35158|c0_g3_i1	114	98	-0.21818	0.769306	1.08182	No	PREDICTED: uncharacterized protein LOC105166164	Sesamum indicum	NA	NA	NA	NA	NA
TR37909|c0_g1_i2	114	98	-0.21818	0.769306	1.08216	No	PREDICTED: chloroplast sensor kinase, chloroplastic isoform X1	Erythranthe guttatus	NA	NA	NA	NA	NA
TR43363|c1_g1_i2	114	98	-0.21818	0.769306	1.08219	No	PREDICTED: glutamate receptor 3.3	Sesamum indicum	NA	NA	NA	NA	NA
TR7887|c1_g1_i4	114	98	-0.21818	0.769306	1.08214	No	PREDICTED: polyadenylate-binding protein-interacting protein 12-like	Sesamum indicum	NA	NA	NA	NA	NA
TR41367|c0_g1_i4	370	420	0.182864	0.769286	1.08221	No	NA	NA	NA	NA	NA	NA	NA
TR43082|c1_g1_i2	514	582	0.179251	0.769182	1.08209	No	PREDICTED: uncharacterized protein LOC105170680 isoform X2	Sesamum indicum	NA	NA	NA	NA	NA
TR41769|c0_g2_i14	190	218	0.198329	0.769122	1.08203	No	PREDICTED: E3 ubiquitin-protein ligase XBAT33	Sesamum indicum	NA	NA	NA	NA	NA
TR7996|c0_g3_i15	190	218	0.198329	0.769122	1.08206	No	NA	NA	NA	NA	NA	NA	NA
TR8240|c1_g6_i2	190	218	0.198329	0.769122	1.08209	No	PREDICTED: myosin heavy chain, striated muscle	Sesamum indicum	NA	NA	NA	NA	NA
TR29183|c0_g3_i1	498	564	0.179549	0.769114	1.0821	No	PREDICTED: translation initiation factor IF-2, chloroplastic isoform X1	Sesamum indicum	NA	NA	NA	NA	NA
TR37802|c0_g3_i1	564	498	-0.179549	0.769114	1.08213	No	PREDICTED: glutamyl-tRNA reductase 1, chloroplastic	Sesamum indicum	NA	NA	NA	NA	NA
TR37980|c0_g2_i6	546	482	-0.179868	0.769062	1.08208	No	PREDICTED: DNA ligase 1-like	Sesamum indicum	NA	NA	NA	NA	NA
TR29894|c0_g1_i2	528	466	-0.180208	0.769029	1.08206	No	PREDICTED: uncharacterized protein LOC105159715	Sesamum indicum	NA	NA	NA	NA	NA
TR7306|c0_g1_i2	434	492	0.180963	0.769022	1.08208	No	AF221856_1heat-shock protein 80	Euphorbia esula	NA	protein folding[GO:0006457] ; response to stress[GO:0006950]	ATP binding[GO:0005524] ; unfolded protein binding[GO:0051082]	NA	NA
TR44689|c0_g1_i1	1286	1134	-0.18147	0.769022	1.0821	No	PREDICTED: uncharacterized protein LOC105160162 isoform X2	Sesamum indicum	NA	NA	NA	NA	NA
TR37812|c0_g2_i13	450	510	0.180572	0.769015	1.08212	No	PREDICTED: protein BASIC PENTACYSTEINE6-like	Sesamum indicum	NA	NA	NA	NA	NA
TR7838|c2_g1_i4	450	510	0.180572	0.769015	1.08214	No	PREDICTED: uncharacterized protein LOC105163284	Sesamum indicum	NA	NA	NA	NA	NA
TR36299|c0_g1_i3	206	236	0.196143	0.769013	1.08217	No	PREDICTED: ras-related protein RABE1c	Sesamum indicum	NA	NA	NA	NA	NA
TR2949|c0_g4_i1	236	206	-0.196143	0.769013	1.08219	No	PREDICTED: serine/threonine-protein phosphatase PP2A-2 catalytic subunit-like	Erythranthe guttatus	NA	NA	NA	NA	NA
TR42970|c0_g5_i2	236	206	-0.196143	0.769013	1.08222	No	hypothetical protein MIMGU_mgv1a025107mg	Mimulus guttatus	NA	NA	zinc ion binding[GO:0008270]	NA	NA
TR44610|c1_g1_i1	4052	4714	0.218318	0.769	1.08223	No	PREDICTED: protein TOPLESS	Sesamum indicum	NA	NA	NA	NA	NA
TR2917|c0_g2_i3	200	174	-0.200913	0.768985	1.08223	No	PREDICTED: protein AUXIN SIGNALING F-BOX 2	Sesamum indicum	NA	NA	NA	NA	NA
TR30197|c0_g1_i3	200	174	-0.200913	0.768985	1.08226	No	PREDICTED: UDP-glucuronate 4-epimerase 3-like	Sesamum indicum	NA	NA	NA	NA	NA
TR30756|c0_g1_i3	200	174	-0.200913	0.768985	1.08228	No	NA	NA	NA	NA	NA	NA	NA
TR35259|c0_g3_i1	200	174	-0.200913	0.768985	1.08231	No	hypothetical protein MIMGU_mgv1a011459mg	Mimulus guttatus	NA	NA	NA	NA	NA
TR42824|c0_g1_i1	288	328	0.187627	0.768979	1.08233	No	PREDICTED: probable helicase MAGATAMA 3 isoform X1	Sesamum indicum	NA	NA	NA	NA	NA
TR17629|c0_g1_i1	32	38	0.247928	0.768873	1.08294	No	PREDICTED: ribosome biogenesis protein wdr12	Sesamum indicum	NA	NA	NA	NA	NA
TR19144|c0_g1_i1	32	38	0.247928	0.768873	1.08223	No	NA	NA	NA	NA	NA	NA	NA
TR23179|c0_g1_i1	32	38	0.247928	0.768873	1.08226	No	PREDICTED: uncharacterized protein LOC105177343	Sesamum indicum	NA	NA	NA	NA	NA
TR23548|c0_g2_i1	32	38	0.247928	0.768873	1.08228	No	PREDICTED: mitogen-activated protein kinase 16	Sesamum indicum	NA	NA	NA	NA	NA
TR2570|c0_g1_i12	32	38	0.247928	0.768873	1.08231	No	hypothetical protein MIMGU_mgv1a013398mg	Mimulus guttatus	NA	membrane fusion[GO:0061025] ; vesicle-mediated transport[GO:0016192] ; intracellular protein transport[GO:0006886]	SNAP receptor activity[GO:0005484]	Golgi apparatus[GO:0005794] ; integral component of membrane[GO:0016021]	NA
TR26090|c0_g1_i1	32	38	0.247928	0.768873	1.08233	No	hypothetical protein MIMGU_mgv1a0087053mg, partial	Mimulus guttatus	NA	protein phosphorylation[GO:0006468]	protein kinase activity[GO:0004672] ; ATP binding[GO:0005524]	NA	NA
TR28597|c0_g1_i1	32	38	0.247928	0.768873	1.08236	No	PREDICTED: uncharacterized protein LOC105158848 isoform X3	Sesamum indicum	NA	NA	NA	NA	NA
TR29166|c0_g2_i1	32	38	0.247928	0.768873	1.08239	No	hypothetical protein MIMGU_mgv1a006156mg	Mimulus guttatus	NA	protein folding[GO:0006457] ; protein peptidyl-prolyl isomerization[GO:0000413]	peptidyl-prolyl cis-trans isomerase activity[GO:0003755]	NA	NA
TR29181|c2_g1_i3	32	38	0.247928	0.768873	1.08241	No	PREDICTED: probable receptor-like protein kinase At1g67000-like, partial	Solanum tuberosum	NA	NA	NA	NA	NA
TR2938|c0_g1_i2	32	38	0.247928	0.768873	1.08244	No	PREDICTED: cyclin-dependent kinase inhibitor 4	Sesamum indicum	NA	NA	NA	NA	NA
TR30811|c4_g2_i2	32	38	0.247928	0.768873	1.08247	No	PREDICTED: mediator of RNA polymerase II transcription subunit 9	Erythranthe guttatus	NA	NA	NA	NA	NA
TR30928|c0_g4_i5	32	38	0.247928	0.768873	1.08249	No	PREDICTED: general transcription factor IIH subunit 3	Sesamum indicum	NA	NA	NA	NA	NA
TR31676|c0_g1_i5	32	38	0.247928	0.768873	1.08252	No	hypothetical protein MIMGU_mgv1a013319mg	Mimulus guttatus	NA	NA	NA	NA	NA
TR33452|c1_g1_i9	32	38	0.247928	0.768873	1.08254	No	PREDICTED: peroxidase 46	Erythranthe guttatus	NA	NA	NA	NA	NA
TR34181|c0_g2_i1	32	38	0.247928	0.768873	1.08257	No	PREDICTED: nascent polypeptide-associated complex subunit alpha-like protein	Sesamum indicum	NA	NA	NA	NA	NA
TR34367|c0_g2_i3	32	38	0.247928	0.768873	1.0826	No	PREDICTED: serine carboxypeptidase-like 34	Sesamum indicum	NA	NA	NA	NA	NA
TR34472|c0_g4_i1	32	38	0.247928	0.768873	1.08262	No	PREDICTED: probable receptor-like protein kinase At2g42960	Erythranthe guttatus	NA	NA	NA	NA	NA
TR34868|c0_g1_i7	32	38	0.247928	0.768873	1.08265	No	NA	NA	NA	NA	NA	NA	NA
TR3518|c1_g1_i1	32	38	0.247928	0.768873	1.08267	No	PREDICTED: uncharacterized protein LOC105158188 isoform X2	Sesamum indicum	NA	NA	NA	NA	NA
TR35878|c0_g3_i2	32	38	0.247928	0.768873	1.0827	No	PREDICTED: uncharacterized protein LOC105165962	Sesamum indicum	NA	NA	NA	NA	NA
TR36341|c1_g2_i10	32	38	0.247928	0.768873	1.08273	No	PREDICTED: protein NRT1/ PTR FAMILY 3.1 isoform X3	Sesamum indicum	NA	NA	NA	NA	NA
TR36733|c1_g6_i1	32	38	0.247928	0.768873	1.08275	No	PREDICTED: succinyl-CoA ligase [ADP-forming] subunit alpha-2, mitochondrial	Sesamum indicum	NA	NA	NA	NA	NA
TR37101|c0_g1_i1	32	38	0.247928	0.768873	1.08278	No	PREDICTED: protein ROOT HAIR DEFECTIVE 3-like	Sesamum indicum	NA	NA	NA	NA	NA
TR37873|c1_g6_i1	32	38	0.247928	0.768873	1.0828	No	hypothetical protein CISIN_1g040684mg, partial	Citrus sinensis	NA	cell redox homeostasis[GO:0045454] ; oxidation-reduction process[GO:0055114]	electron carrier activity[GO:0009055] ; protein disulfide oxidoreductase activity[GO:0015035]	cell[GO:0005623]	NA
TR38028|c0_g2_i4	32	38	0.247928	0.768873	1.08283	No	PREDICTED: protein DA1-related 2-like isoform X2	Nicotiana tomentosiformis	NA	NA	NA	NA	NA
TR39022|c2_g3_i3	32	38	0.247928	0.768873	1.08286	No	PREDICTED: thiol-disulfide oxidoreductase LTO1-like	Sesamum indicum	NA	NA	NA	NA	NA
TR39531|c1_g4_i2	32	38	0.247928	0.768873	1.08288	No	NA	NA	NA	NA	NA	NA	NA
TR39624|c0_g1_i2	32	38	0.247928	0.768873	1.08291	No	hypothetical protein MIMGU_mgv1a010545mg	Mimulus guttatus	NA	NA	NA	NA	NA
TR39830|c0_g1_i2	32	38	0.247928	0.768873	1.0822	No	unnamed protein product	Coffea canephora	NA	auxin-activated signaling pathway[GO:0009734] ; regulation of transcription, DNA-templated[GO:0006355] ; transcription, DNA-templated[GO:0006351]	NA	nucleus[GO:0005634]	NA
TR39990|c0_g2_i2	32	38	0.247928	0.768873	1.08296	No	PREDICTED: UDP-glycosyltransferase 89A2-like	Sesamum indicum	NA	NA	NA	NA	NA
TR40056|c0_g3_i1	32	38	0.247928	0.768873	1.08299	No	hypothetical protein POPTR_0015s06580g	Populus trichocarpa	NA	NA	NA	integral component of membrane[GO:0016021]	NA
TR40125|c1_g10_i1	32	38	0.247928	0.768873	1.08301	No	PREDICTED: WD repeat-containing protein LWD1	Sesamum indicum	NA	NA	NA	NA	NA
TR41498|c0_g4_i1	32	38	0.247928	0.768873	1.08304	No	PREDICTED: choline/ethanolaminephosphotransferase 1	Sesamum indicum	NA	NA	NA	NA	NA
TR41596|c0_g5_i1	32	38	0.247928	0.768873	1.08307	No	PREDICTED: ornithine aminotransferase, mitochondrial isoform X2	Cucumis melo	NA	NA	NA	NA	NA
TR41672|c0_g5_i4	32	38	0.247928	0.768873	1.08309	No	PREDICTED: NAC domain-containing protein 78 isoform X1	Sesamum indicum	NA	NA	NA	NA	NA
TR41745|c1_g4_i1	32	38	0.247928	0.768873	1.08312	No	hypothetical protein MIMGU_mgv1a003198mg	Mimulus guttatus	NA	mRNA processing[GO:0006397]	RNA binding[GO:0003723] ; nucleotide binding[GO:0000166]	nucleus[GO:0005634]	NA
TR42040|c0_g2_i2	32	38	0.247928	0.768873	1.08314	No	unnamed protein product	Coffea canephora	NA	protein phosphorylation[GO:0006468]	protein kinase activity[GO:0004672] ; ATP binding[GO:0005524]	integral component of membrane[GO:0016021]	NA
TR42581|c0_g4_i1	32	38	0.247928	0.768873	1.08317	No	PREDICTED: molybdenum cofactor sulfurase isoform X3	Sesamum indicum	NA	NA	NA	NA	NA
TR42610|c2_g3_i1	32	38	0.247928	0.768873	1.0832	No	NA	NA	NA	NA	NA	NA	NA
TR42626|c1_g2_i2	32	38	0.247928	0.768873	1.08322	No	PREDICTED: uncharacterized protein LOC105168011	Sesamum indicum	NA	NA	NA	NA	NA
TR42952|c0_g1_i4	32	38	0.247928	0.768873	1.08325	No	hypothetical protein MIMGU_mgv1a003504mg	Mimulus guttatus	NA	NA	NA	NA	NA
TR42985|c0_g1_i1	32	38	0.247928	0.768873	1.08327	No	unknown	Lotus japonicus	NA	nucleoside metabolic process[GO:0009116]	transferase activity[GO:0016740]	NA	NA
TR43485|c0_g5_i1	32	38	0.247928	0.768873	1.0833	No	PREDICTED: cellulose synthase-like protein G1 isoform X2	Erythranthe guttatus	NA	NA	NA	NA	NA
TR43877|c0_g4_i3	32	38	0.247928	0.768873	1.08333	No	PREDICTED: pentatricopeptide repeat-containing protein At2g15820 isoform X2	Sesamum indicum	NA	NA	NA	NA	NA
TR44215|c1_g8_i8	32	38	0.247928	0.768873	1.08335	No	PREDICTED: probable galactinol--sucrose galactosyltransferase 2	Sesamum indicum	NA	NA	NA	NA	NA
TR44308|c1_g1_i1	32	38	0.247928	0.768873	1.08338	No	hypothetical protein MIMGU_mgv1a002315mg	Mimulus guttatus	NA	methylation[GO:0032259]	methyltransferase activity[GO:0008168]	integral component of membrane[GO:0016021]	NA
TR44440|c0_g1_i1	32	38	0.247928	0.768873	1.08341	No	hypothetical protein MIMGU_mgv1a000534mg	Mimulus guttatus	NA	isoleucyl-tRNA aminoacylation[GO:0006428] ; regulation of translational fidelity[GO:0006450]	isoleucine-tRNA ligase activity[GO:0004822] ; aminoacyl-tRNA editing activity[GO:0002161] ; ATP binding[GO:0005524]	cytoplasm[GO:0005737]	map00970:Aminoacyl-tRNA biosynthesis(ligase[ec:6.1.1.5])
TR44560|c1_g3_i5	32	38	0.247928	0.768873	1.08343	No	PREDICTED: uncharacterized protein LOC105170563 isoform X1	Sesamum indicum	NA	NA	NA	NA	NA
TR7485|c0_g1_i1	32	38	0.247928	0.768873	1.08346	No	PREDICTED: acyl-[acyl-carrier-protein] desaturase, chloroplastic-like	Sesamum indicum	NA	NA	NA	NA	NA
TR7801|c0_g1_i3	32	38	0.247928	0.768873	1.08348	No	hypothetical protein MIMGU_mgv1a0006242mg, partial	Mimulus guttatus	NA	NA	NA	NA	NA
TR7998|c0_g3_i2	32	38	0.247928	0.768873	1.08351	No	NA	NA	NA	NA	NA	NA	NA
TR1531|c0_g1_i1	38	32	-0.247928	0.768873	1.08354	No	NA	NA	NA	NA	NA	NA	NA
TR2309|c0_g1_i3	38	32	-0.247928	0.768873	1.08356	No	PREDICTED: putative late blight resistance protein homolog R1B-14	Sesamum indicum	NA	NA	NA	NA	NA
TR25110|c1_g1_i1	38	32	-0.247928	0.768873	1.08359	No	NA	NA	NA	NA	NA	NA	NA
TR2521|c0_g2_i1	38	32	-0.247928	0.768873	1.08361	No	NA	NA	NA	NA	NA	NA	NA
TR27988|c0_g1_i3	38	32	-0.247928	0.768873	1.08364	No	NA	NA	NA	NA	NA	NA	NA
TR29822|c0_g5_i2	38	32	-0.247928	0.768873	1.08367	No	hypothetical protein MIMGU_mgv1a002315mg	Mimulus guttatus	NA	methylation[GO:0032259]	methyltransferase activity[GO:0008168]	integral component of membrane[GO:0016021]	NA
TR30571|c0_g1_i3	38	32	-0.247928	0.768873	1.08369	No	NA	NA	NA	NA	NA	NA	NA
TR31074|c0_g1_i2	38	32	-0.247928	0.768873	1.08372	No	hypothetical protein MIMGU_mgv1a014912mg	Mimulus guttatus	NA	NA	NA	NA	NA
TR31859|c0_g3_i1	38	32	-0.247928	0.768873	1.08375	No	PREDICTED: uncharacterized protein LOC105157385	Sesamum indicum	NA	NA	NA	NA	NA
TR32732|c0_g1_i3	38	32	-0.247928	0.768873	1.08377	No	PREDICTED: uncharacterized protein LOC105161923 isoform X1	Sesamum indicum	NA	NA	NA	NA	NA
TR33362|c0_g7_i1	38	32	-0.247928	0.768873	1.0838	No	NA	NA	NA	NA	NA	NA	NA
TR33685|c1_g1_i3	38	32	-0.247928	0.768873	1.08382	No	NA	NA	NA	NA	NA	NA	NA
TR35124|c0_g1_i5	38	32	-0.247928	0.768873	1.08385	No	hypothetical protein JCGZ_04419	Jatropha curcas	NA	carbohydrate metabolic process[GO:0005975]	hydrolase activity, hydrolyzing O-glycosyl compounds[GO:0004553]	NA	NA
TR3520|c1_g1_i2	38	32	-0.247928	0.768873	1.08388	No	PREDICTED: uncharacterized protein LOC105172443	Sesamum indicum	NA	NA	NA	NA	NA
TR36029|c3_g1_i9	38	32	-0.247928	0.768873	1.0839	No	hypothetical protein MIMGU_mgv1a021493mg, partial	Mimulus guttatus	NA	NA	NA	NA	NA
TR36889|c1_g5_i2	38	32	-0.247928	0.768873	1.08458	No	hypothetical protein B456_002G126500	Gossypium raimondii	NA	regulation of transcription, DNA-templated[GO:0006355]	sequence-specific DNA binding[GO:0043565] ; transcription factor activity, sequence-specific DNA binding[GO:0003700]	NA	NA
TR37453|c0_g2_i3	38	32	-0.247928	0.768873	1.08395	No	PREDICTED: vacuolar protein sorting-associated protein 26A	Nicotiana sylvestris	NA	NA	NA	NA	NA
TR37675|c3_g3_i2	38	32	-0.247928	0.768873	1.08398	No	PREDICTED: probable plastid-lipid-associated protein 13, chloroplastic	Sesamum indicum	NA	NA	NA	NA	NA
TR37723|c0_g8_i1	38	32	-0.247928	0.768873	1.08401	No	beta-cyanoalanine synthase 1, partial	Prunus dulcis	NA	cysteine biosynthetic process from serine[GO:0006535] ; cyanide metabolic process[GO:0019499]	cysteine synthase activity[GO:0004124] ; L-3-cyanoalanine synthase activity[GO:0050017]	mitochondrion[GO:0005739]	map00920:Sulfur metabolism(synthase[ec:2.5.1.47]) ; map01130:Biosynthesis of antibiotics(synthase[ec:2.5.1.47]) ; map00460:Cyanoamino acid metabolism(synthase[ec:4.4.1.9]) ; map00270:Cysteine and methionine metabolism(synthase[ec:2.5.1.47])
TR37841|c0_g6_i6	38	32	-0.247928	0.768873	1.08403	No	PREDICTED: probable WRKY transcription factor 40	Sesamum indicum	NA	NA	NA	NA	NA
TR37944|c0_g2_i1	38	32	-0.247928	0.768873	1.08406	No	PREDICTED: uncharacterized protein At1g32220, chloroplastic isoform X2	Sesamum indicum	NA	NA	NA	NA	NA
TR38762|c0_g1_i1	38	32	-0.247928	0.768873	1.08409	No	hypothetical protein MIMGU_mgv1a011211mg	Mimulus guttatus	NA	NA	NA	NA	NA
TR39252|c0_g1_i9	38	32	-0.247928	0.768873	1.08411	No	hypothetical protein CISIN_1g0190621mg, partial	Citrus sinensis	NA	NA	NA	NA	NA
TR3932|c1_g1_i4	38	32	-0.247928	0.768873	1.08414	No	structural constituent of ribosome, putative	Ricinus communis	NA	translation[GO:0006412]	structural constituent of ribosome[GO:0003735]	ribosome[GO:0005840]	NA
TR39431|c1_g4_i4	38	32	-0.247928	0.768873	1.08416	No	NA	NA	NA	NA	NA	NA	NA
TR39730|c0_g2_i3	38	32	-0.247928	0.768873	1.08419	No	PREDICTED: NAD-dependent protein deacetylase SRT1 isoform X3	Sesamum indicum	NA	NA	NA	NA	NA
TR40293|c0_g1_i8	38	32	-0.247928	0.768873	1.08422	No	PREDICTED: uncharacterized protein LOC105950270 isoform X2	Erythranthe guttatus	NA	NA	NA	NA	NA
TR4030|c0_g2_i2	38	32	-0.247928	0.768873	1.08424	No	NA	NA	NA	NA	NA	NA	NA
TR40606|c0_g1_i2	38	32	-0.247928	0.768873	1.08427	No	NA	NA	NA	NA	NA	NA	NA
TR40706|c0_g1_i1	38	32	-0.247928	0.768873	1.0843	No	PREDICTED: GATA transcription factor 28	Sesamum indicum	NA	NA	NA	NA	NA
TR40743|c1_g1_i2	38	32	-0.247928	0.768873	1.08432	No	PREDICTED: SWI/SNF complex subunit SWI3B	Sesamum indicum	NA	NA	NA	NA	NA
TR41965|c1_g2_i2	38	32	-0.247928	0.768873	1.08435	No	PREDICTED: zinc finger CCCH domain-containing protein 5	Erythranthe guttatus	NA	NA	NA	NA	NA
TR42804|c1_g2_i2	38	32	-0.247928	0.768873	1.08437	No	PREDICTED: quinolinate synthase, chloroplastic isoform X2	Sesamum indicum	NA	NA	NA	NA	NA
TR43273|c0_g9_i12	38	32	-0.247928	0.768873	1.0844	No	PREDICTED: NPL4-like protein 2	Sesamum indicum	NA	NA	NA	NA	NA
TR43693|c0_g4_i6	38	32	-0.247928	0.768873	1.08443	No	PREDICTED: rab proteins geranylgeranyltransferase component A	Sesamum indicum	NA	NA	NA	NA	NA
TR44799|c2_g1_i1	38	32	-0.247928	0.768873	1.08445	No	NA	NA	NA	NA	NA	NA	NA
TR7411|c0_g1_i2	38	32	-0.247928	0.768873	1.08448	No	PREDICTED: RAN GTPase-activating protein 2-like isoform X1	Sesamum indicum	NA	NA	NA	NA	NA
TR8008|c0_g2_i5	38	32	-0.247928	0.768873	1.0845	No	PREDICTED: selenoprotein O-like	Nelumbo nucifera	NA	NA	NA	NA	NA
TR8117|c0_g5_i1	38	32	-0.247928	0.768873	1.08453	No	hypothetical protein CISIN_1g007627mg	Citrus sinensis	NA	oxidation-reduction process[GO:0055114]	oxidoreductase activity, acting on the aldehyde or oxo group of donors, NAD or NADP as acceptor[GO:0016620]	NA	NA
TR8137|c0_g4_i4	38	32	-0.247928	0.768873	1.08456	No	hypothetical protein MIMGU_mgv1a002705mg	Mimulus guttatus	NA	regulation of transcription, DNA-templated[GO:0006355]	double-stranded DNA binding[GO:0003690]	mitochondrion[GO:0005739]	NA
TR8281|c3_g2_i4	38	32	-0.247928	0.768873	1.08393	No	PREDICTED: uncharacterized protein LOC105177385	Sesamum indicum	NA	NA	NA	NA	NA
TR2944|c1_g1_i2	222	254	0.194269	0.768769	1.08454	No	PREDICTED: RNA polymerase II C-terminal domain phosphatase-like 2	Sesamum indicum	NA	NA	NA	NA	NA
TR37475|c0_g6_i4	222	254	0.194269	0.768769	1.08446	No	PREDICTED: ubiquitin carboxyl-terminal hydrolase isozyme L5-like	Sesamum indicum	NA	NA	NA	NA	NA
TR44100|c1_g3_i1	222	254	0.194269	0.768769	1.08449	No	PREDICTED: calcium-dependent protein kinase 13-like	Malus domestica	NA	NA	NA	NA	NA
TR39170|c0_g2_i6	254	222	-0.194269	0.768769	1.08452	No	PREDICTED: DEAD-box ATP-dependent RNA helicase 35	Sesamum indicum	NA	NA	NA	NA	NA
TR42436|c0_g3_i2	304	346	0.186701	0.768753	1.08455	No	calreticulin	Parthenium argentatum	NA	protein folding[GO:0006457]	unfolded protein binding[GO:0051082] ; calcium ion binding[GO:0005509]	endoplasmic reticulum[GO:0005783]	NA
TR33601|c0_g6_i3	158	182	0.204014	0.76847	1.08417	No	NA	NA	NA	NA	NA	NA	NA
TR44623|c0_g1_i1	158	182	0.204014	0.76847	1.0842	No	PREDICTED: calpain-A-like	Fragaria vesca subsp. vesca	NA	NA	NA	NA	NA
TR33723|c0_g1_i5	182	158	-0.204014	0.76847	1.08422	No	PREDICTED: glycine-rich RNA-binding protein 2, mitochondrial-like	Sesamum indicum	NA	NA	NA	NA	NA
TR44783|c1_g1_i1	182	158	-0.204014	0.76847	1.08425	No	PREDICTED: nuclear pore complex protein GP210	Sesamum indicum	NA	NA	NA	NA	NA
TR28558|c0_g1_i2	238	272	0.192645	0.768468	1.08428	No	NA	NA	NA	NA	NA	NA	NA
TR19231|c0_g1_i1	382	336	-0.185111	0.768427	1.08424	No	allergen	Salvia miltiorrhiza	NA	response to stimulus[GO:0050896]	NA	NA	NA
TR22210|c0_g1_i1	400	352	-0.184425	0.768308	1.0841	No	PREDICTED: peptidyl-prolyl cis-trans isomerase FKBP12	Sesamum indicum	NA	NA	NA	NA	NA
TR3922|c0_g1_i1	682	772	0.178829	0.768304	1.08412	No	unnamed protein product	Coffea canephora	NA	nucleocytoplasmic transport[GO:0006913] ; intracellular protein transport[GO:0006886] ; metabolic process[GO:0008152] ; small GTPase mediated signal transduction[GO:0007264]	GTP binding[GO:0005525] ; GTPase activity[GO:0003924]	intracellular[GO:0005622] ; membrane[GO:0016020]	NA
TR38196|c0_g1_i2	562	496	-0.18023	0.76829	1.08413	No	PREDICTED: equilibrative nucleotide transporter 3-like isoform X1	Sesamum indicum	NA	NA	NA	NA	NA
TR39645|c0_g1_i4	562	496	-0.18023	0.76829	1.08415	No	PREDICTED: polyadenylate-binding protein-interacting protein 7 isoform X1	Sesamum indicum	NA	NA	NA	NA	NA
TR32429|c1_g1_i6	368	418	0.183797	0.768216	1.08408	No	hypothetical protein MIMGU_mgv1a011321mg	Mimulus guttatus	NA	NA	NA	integral component of membrane[GO:0016021]	NA
TR43783|c0_g1_i1	368	418	0.183797	0.768216	1.0841	No	hypothetical protein MIMGU_mgv1a000763mg	Mimulus guttatus	NA	NA	NA	NA	NA
TR32372|c0_g1_i7	544	480	-0.180572	0.768215	1.08413	No	PREDICTED: protein SAWADEE HOMEODOMAIN HOMOLOG 1-like	Erythranthe guttatus	NA	NA	NA	NA	NA
TR39392|c0_g4_i3	384	436	0.183222	0.768151	1.08406	No	PREDICTED: aspartate aminotransferase, mitochondrial isoform X1	Sesamum indicum	NA	NA	NA	NA	NA
TR39166|c0_g2_i4	416	472	0.182203	0.76809	1.08403	No	NA	NA	NA	NA	NA	NA	NA
TR29556|c0_g1_i1	472	416	-0.182203	0.76809	1.084	No	PREDICTED: mitochondrial inner membrane protease ATP23	Sesamum indicum	NA	NA	NA	NA	NA
TR32888|c0_g1_i1	112	130	0.215013	0.768021	1.08396	No	Ras-related protein Rab-18	Theobroma cacao	NA	small GTPase mediated signal transduction[GO:0007264] ; protein transport[GO:0015031]	GTP binding[GO:0005525]	intracellular[GO:0005622]	NA
TR33873|c0_g1_i1	112	130	0.215013	0.768021	1.08398	No	PREDICTED: sporulation-specific protein 15	Sesamum indicum	NA	NA	NA	NA	NA
TR37332|c2_g2_i2	112	130	0.215013	0.768021	1.08401	No	PREDICTED: bifunctional epoxide hydrolase 2-like	Sesamum indicum	NA	NA	NA	NA	NA
TR37493|c0_g7_i1	112	130	0.215013	0.768021	1.08438	No	PREDICTED: uncharacterized protein LOC105168317	Sesamum indicum	NA	NA	NA	NA	NA
TR39472|c2_g2_i1	112	130	0.215013	0.768021	1.08406	No	PREDICTED: protein MITOFERRINLIKE 1, chloroplastic	Sesamum indicum	NA	NA	NA	NA	NA
TR39721|c1_g1_i5	112	130	0.215013	0.768021	1.08409	No	PREDICTED: wall-associated receptor kinase-like 20	Sesamum indicum	NA	NA	NA	NA	NA
TR40742|c0_g2_i1	112	130	0.215013	0.768021	1.08412	No	NA	NA	NA	NA	NA	NA	NA
TR43027|c5_g2_i1	112	130	0.215013	0.768021	1.08414	No	PREDICTED: vacuolar-sorting receptor 1-like	Sesamum indicum	NA	NA	NA	NA	NA
TR17801|c0_g1_i1	130	112	-0.215013	0.768021	1.08417	No	hypothetical protein Csa_2G249920	Cucumis sativus	NA	vesicle-mediated transport[GO:0016192] ; intracellular protein transport[GO:0006886]	structural molecule activity[GO:0005198]	membrane coat[GO:0030117]	NA
TR2195|c0_g1_i4	130	112	-0.215013	0.768021	1.08419	No	PREDICTED: F-box protein FBW2	Sesamum indicum	NA	NA	NA	NA	NA
TR2274|c0_g1_i3	130	112	-0.215013	0.768021	1.08422	No	PREDICTED: uncharacterized protein LOC105178137 isoform X1	Sesamum indicum	NA	NA	NA	NA	NA
TR29755|c0_g2_i1	130	112	-0.215013	0.768021	1.08425	No	hypothetical protein MIMGU_mgv1a016526mg	Mimulus guttatus	NA	NA	NA	integral component of membrane[GO:0016021]	NA
TR33965|c0_g1_i6	130	112	-0.215013	0.768021	1.08427	No	PREDICTED: putative serine/threonine-protein kinase	Sesamum indicum	NA	NA	NA	NA	NA
TR37554|c0_g4_i3	130	112	-0.215013	0.768021	1.0843	No	PREDICTED: serine/threonine-protein phosphatase PP1-like	Sesamum indicum	NA	NA	NA	NA	NA
TR38183|c0_g4_i11	130	112	-0.215013	0.768021	1.08433	No	PREDICTED: receptor-like serine/threonine-protein kinase ALE2-like	Solanum lycopersicum	NA	protein phosphorylation[GO:0006468]	ATP binding[GO:0005524] ; protein serine/threonine kinase activity[GO:0004674]	integral component of membrane[GO:0016021]	NA
TR38225|c0_g1_i5	130	112	-0.215013	0.768021	1.08435	No	NA	NA	NA	NA	NA	NA	NA
TR40955|c0_g1_i2	130	112	-0.215013	0.768021	1.08404	No	PREDICTED: calcium and calcium/calmodulin-dependent serine/threonine-protein kinase-like	Sesamum indicum	NA	NA	NA	NA	NA
TR31888|c0_g5_i1	308	270	-0.189971	0.767878	1.0842	No	PREDICTED: pyridoxal reductase, chloroplastic	Sesamum indicum	NA	NA	NA	NA	NA
TR36867|c0_g2_i3	5514	4710	-0.227372	0.767832	1.08416	No	PREDICTED: chloroplast stem-loop binding protein of 41 kDa a, chloroplastic	Sesamum indicum	NA	NA	NA	NA	NA
TR32076|c0_g3_i1	902	1022	0.180196	0.767734	1.08405	No	PREDICTED: LOW QUALITY PROTEIN: vesicle-associated membrane protein 727	Sesamum indicum	NA	NA	NA	NA	NA
TR34064|c0_g1_i9	142	164	0.207805	0.767698	1.08405	No	NA	NA	NA	NA	NA	NA	NA
TR42758|c0_g2_i1	142	164	0.207805	0.767698	1.08403	No	PREDICTED: UV-stimulated scaffold protein A homolog	Sesamum indicum	NA	NA	NA	NA	NA
TR44834|c2_g1_i2	164	142	-0.207805	0.767698	1.08408	No	PREDICTED: mediator of RNA polymerase II transcription subunit 12 isoform X1	Sesamum indicum	NA	NA	NA	NA	NA
TR32933|c0_g3_i2	286	326	0.188857	0.767646	1.08403	No	PREDICTED: vacuolar protein-sorting-associated protein 37 homolog 1 isoform X1	Sesamum indicum	NA	NA	NA	NA	NA
TR40794|c2_g2_i4	286	326	0.188857	0.767646	1.08406	No	PREDICTED: phosphoglucomutase, cytoplasmic	Sesamum indicum	NA	NA	NA	NA	NA
TR35931|c0_g1_i4	666	588	-0.179706	0.767617	1.08404	No	PREDICTED: glyoxylate/hydroxypyruvate reductase HPR3-like	Nicotiana tomentosiformis	NA	NA	NA	NA	NA
TR42920|c0_g3_i3	740	838	0.179425	0.767614	1.08406	No	PREDICTED: beta-amylase 7	Sesamum indicum	NA	NA	NA	NA	NA
TR39196|c0_g1_i2	804	710	-0.179376	0.767613	1.08409	No	PREDICTED: fumarate hydratase 1, mitochondrial	Sesamum indicum	NA	NA	NA	NA	NA
TR43820|c1_g1_i2	344	302	-0.18786	0.767477	1.08392	No	hypothetical protein MIMGU_mgv1a001106mg	Mimulus guttatus	NA	NA	NA	NA	NA
TR43979|c2_g4_i1	344	302	-0.18786	0.767477	1.08395	No	hypothetical protein MIMGU_mgv1a001504mg	Mimulus guttatus	NA	transport[GO:0006810]	calcium ion binding[GO:0005509]	integral component of membrane[GO:0016021]	NA
TR39735|c0_g1_i3	972	1102	0.181096	0.76737	1.08383	No	PREDICTED: glutamine-dependent NAD(+) synthetase	Sesamum indicum	NA	NA	NA	NA	NA
TR33630|c0_g1_i1	542	478	-0.181282	0.767362	1.08384	No	PREDICTED: uncharacterized protein LOC105161789, partial	Sesamum indicum	NA	NA	NA	NA	NA
TR32865|c1_g4_i3	694	786	0.179594	0.767327	1.08382	No	PREDICTED: nuclear transcription factor Y subunit C-1	Sesamum indicum	NA	NA	NA	NA	NA
TR35417|c0_g4_i3	334	380	0.186151	0.767258	1.08375	No	PREDICTED: uncharacterized protein At4g15545-like	Sesamum indicum	NA	NA	NA	NA	NA
TR42168|c0_g1_i1	334	380	0.186151	0.767258	1.08377	No	hypothetical protein MIMGU_mgv1a005777mg	Mimulus guttatus	NA	NA	NA	NA	NA
TR39471|c1_g1_i5	204	234	0.197939	0.767195	1.08371	No	PREDICTED: putative DNA-binding protein ESCAROLA	Sesamum indicum	NA	NA	NA	NA	NA
TR30459|c0_g1_i2	188	216	0.200299	0.767146	1.08367	No	PREDICTED: uncharacterized protein At4g22758-like	Sesamum indicum	NA	NA	NA	NA	NA
TR34724|c0_g1_i4	188	216	0.200299	0.767146	1.08369	No	PREDICTED: probable alpha-mannosidase I MNS4	Sesamum indicum	NA	NA	NA	NA	NA
TR37341|c0_g7_i4	188	216	0.200299	0.767146	1.08372	No	hypothetical protein MIMGU_mgv1a011154mg	Mimulus guttatus	NA	peptidyl-tyrosine dephosphorylation[GO:0035335]	protein tyrosine phosphatase activity[GO:0004725] ; protein tyrosine/serine/threonine phosphatase activity[GO:0008138]	NA	NA
TR34850|c0_g1_i2	366	416	0.18474	0.767138	1.08373	No	hypothetical protein MIMGU_mgv1a010335mg	Mimulus guttatus	NA	oxidation-reduction process[GO:0055114]	oxidoreductase activity[GO:0016491]	NA	NA
TR40533|c0_g2_i2	414	470	0.18303	0.767122	1.08374	No	PREDICTED: subtilisin-like protease	Sesamum indicum	NA	NA	NA	NA	NA
TR42805|c1_g4_i2	470	414	-0.18303	0.767122	1.08376	No	cyclin-dependent kinase A1	Scutellaria baicalensis	Lamiaceae	protein phosphorylation[GO:0006468]	protein kinase activity[GO:0004672] ; ATP binding[GO:0005524]	NA	NA
TR31761|c2_g11_i1	398	452	0.183554	0.767106	1.08377	No	hypothetical protein MIMGU_mgv1a013200mg	Mimulus guttatus	NA	NA	NA	NA	NA
TR36642|c2_g2_i1	398	452	0.183554	0.767106	1.08379	No	PREDICTED: lipoxygenase 6, chloroplastic	Sesamum indicum	NA	NA	NA	NA	NA
TR34168|c0_g1_i1	252	220	-0.19592	0.767081	1.08378	No	PREDICTED: polyadenylate-binding protein RBP47-like	Sesamum indicum	NA	NA	NA	NA	NA
TR42802|c0_g1_i1	708	802	0.179853	0.767006	1.0837	No	PREDICTED: squamous cell carcinoma antigen recognized by T-cells 3	Sesamum indicum	NA	NA	NA	NA	NA
TR40857|c0_g1_i2	802	708	-0.179853	0.767006	1.08373	No	PREDICTED: histone deacetylase 5	Sesamum indicum	NA	NA	NA	NA	NA
TR8249|c0_g7_i1	1110	1260	0.182864	0.766964	1.0837	No	PREDICTED: serine/threonine-protein kinase prpf4B	Sesamum indicum	NA	NA	NA	NA	NA
TR35094|c2_g1_i3	870	986	0.180572	0.766959	1.08372	No	NA	NA	NA	NA	NA	NA	NA
TR44630|c1_g1_i3	956	1084	0.181282	0.766949	1.08373	No	PREDICTED: ABC transporter G family member 32-like	Sesamum indicum	NA	NA	NA	NA	NA
TR43598|c1_g6_i2	524	594	0.180896	0.766914	1.0837	No	PREDICTED: glycine--tRNA ligase 2, chloroplastic/mitochondrial	Sesamum indicum	NA	NA	NA	NA	NA
TR33318|c1_g1_i10	172	198	0.203092	0.766809	1.08358	No	PREDICTED: enhancer of rudimentary homolog	Erythranthe guttatus	NA	NA	NA	NA	NA
TR34974|c0_g2_i13	172	198	0.203092	0.766809	1.08361	No	PREDICTED: dnaJ homolog subfamily B member 6 isoform X2	Sesamum indicum	NA	NA	NA	NA	NA
TR40972|c0_g1_i1	198	172	-0.203092	0.766809	1.08364	No	PREDICTED: uncharacterized protein At1g76660-like	Sesamum indicum	NA	NA	NA	NA	NA
TR41711|c0_g1_i6	252	288	0.192645	0.766669	1.08346	No	PREDICTED: putative metallophosphoesterase At3g03305	Sesamum indicum	NA	NA	NA	NA	NA
TR44580|c1_g1_i6	912	1034	0.18113	0.766659	1.08348	No	PREDICTED: receptor-like serine/threonine-protein kinase ALE2	Sesamum indicum	NA	NA	NA	NA	NA
TR32826|c0_g1_i1	126	146	0.212545	0.766529	1.08332	No	hypothetical protein MIMGU_mgv1a005557mg	Mimulus guttatus	NA	metabolic process[GO:0008152]	transferase activity, transferring acyl groups other than amino-acyl groups[GO:0016747]	NA	NA
TR36461|c0_g1_i4	126	146	0.212545	0.766529	1.08335	No	PREDICTED: organic cation/carnitine transporter 4	Sesamum indicum	NA	NA	NA	NA	NA
TR37900|c0_g6_i4	126	146	0.212545	0.766529	1.08337	No	PREDICTED: uncharacterized protein LOC105158433	Sesamum indicum	NA	NA	NA	NA	NA
TR42232|c1_g6_i7	126	146	0.212545	0.766529	1.0834	No	PREDICTED: myosin-11-like isoform X1	Sesamum indicum	NA	NA	NA	NA	NA
TR30836|c0_g2_i2	146	126	-0.212545	0.766529	1.08342	No	PREDICTED: transcription initiation factor TFIID subunit 15-like	Populus euphratica	NA	NA	NA	NA	NA
TR40202|c0_g2_i4	146	126	-0.212545	0.766529	1.08345	No	PREDICTED: probable mediator of RNA polymerase II transcription subunit 26c	Sesamum indicum	NA	NA	NA	NA	NA
TR40497|c0_g1_i1	146	126	-0.212545	0.766529	1.08348	No	PREDICTED: pentatricopeptide repeat-containing protein At5g43790	Sesamum indicum	NA	NA	NA	NA	NA
TR4065|c0_g1_i4	146	126	-0.212545	0.766529	1.0835	No	NA	NA	NA	NA	NA	NA	NA
TR40793|c0_g3_i2	146	126	-0.212545	0.766529	1.08353	No	NA	NA	NA	NA	NA	NA	NA
TR41470|c1_g2_i2	146	126	-0.212545	0.766529	1.08356	No	hypothetical protein CL667Contig1_03, partial	Pinus radiata	NA	NA	NA	NA	NA
TR33652|c0_g1_i3	1082	954	-0.181639	0.766479	1.08351	No	hypothetical protein MIMGU_mgv1a008259mg	Mimulus guttatus	NA	metabolic process[GO:0008152]	coenzyme binding[GO:0050662] ; catalytic activity[GO:0003824]	NA	NA
TR40989|c0_g3_i5	522	460	-0.182416	0.766391	1.08341	No	hypothetical protein MIMGU_mgv1a002985mg	Mimulus guttatus	NA	protein folding[GO:0006457] ; protein peptidyl-prolyl isomerization[GO:0000413]	peptidyl-prolyl cis-trans isomerase activity[GO:0003755]	NA	NA
TR36845|c5_g2_i3	284	324	0.190103	0.766298	1.08331	No	PREDICTED: homeobox-leucine zipper protein ATHB-13	Sesamum indicum	NA	NA	NA	NA	NA
TR41001|c0_g2_i6	284	324	0.190103	0.766298	1.08333	No	PREDICTED: putative UPF0481 protein At3g02645	Sesamum indicum	NA	NA	NA	NA	NA
TR41667|c1_g4_i2	284	324	0.190103	0.766298	1.08336	No	PREDICTED: LOW QUALITY PROTEIN: T-complex protein 1 subunit zeta-like	Sesamum indicum	NA	NA	NA	NA	NA
TR40957|c0_g2_i6	300	342	0.189034	0.766188	1.08323	No	hypothetical protein MIMGU_mgv1a006251mg	Mimulus guttatus	NA	chorismate biosynthetic process[GO:0009423] ; aromatic amino acid family biosynthetic process[GO:0009073]	3-phosphoshikimate 1-carboxyvinyltransferase activity[GO:0003866]	NA	map01130:Biosynthesis of antibiotics(1-carboxyvinyltransferase[ec:2.5.1.19]) ; map00400:Phenylalanine, tyrosine and tryptophan biosynthesis(1-carboxyvinyltransferase[ec:2.5.1.19])
TR7778|c2_g4_i2	794	900	0.180786	0.766127	1.08317	No	PREDICTED: serine/arginine-rich splicing factor SR30-like	Sesamum indicum	NA	NA	NA	NA	NA
TR36635|c0_g4_i5	720	816	0.180572	0.76611	1.08317	No	hypothetical protein MIMGU_mgv1a005982mg	Mimulus guttatus	NA	lipid catabolic process[GO:0016042]	hydrolase activity[GO:0016787]	NA	NA
TR28558|c0_g1_i3	378	332	-0.187203	0.766079	1.08315	No	hypothetical protein AALP_AA3G088000	Arabis alpina	NA	NA	NA	integral component of membrane[GO:0016021]	NA
TR28544|c0_g2_i1	156	180	0.206451	0.766063	1.08316	No	NA	NA	NA	NA	NA	NA	NA
TR37031|c0_g2_i1	156	180	0.206451	0.766063	1.08318	No	NA	NA	NA	NA	NA	NA	NA
TR3722|c0_g1_i7	180	156	-0.206451	0.766063	1.08321	No	PREDICTED: uncharacterized protein LOC105176667	Sesamum indicum	NA	NA	NA	NA	NA
TR38222|c0_g2_i1	180	156	-0.206451	0.766063	1.08324	No	PREDICTED: protein starmaker-like	Sesamum indicum	NA	NA	NA	NA	NA
TR38887|c0_g1_i5	180	156	-0.206451	0.766063	1.08326	No	PREDICTED: phosphatidylinositol-glycan biosynthesis class F protein	Erythranthe guttatus	NA	NA	NA	NA	NA
TR7831|c0_g3_i1	2460	2146	-0.197008	0.765848	1.08299	No	monodehydroascorbate reductase	Acanthus ebracteatus	NA	cell redox homeostasis[GO:0045454] ; oxidation-reduction process[GO:0055114]	flavin adenine dinucleotide binding[GO:0050660] ; oxidoreductase activity[GO:0016491]	cell[GO:0005623]	NA
TR32700|c0_g1_i2	1668	1464	-0.188204	0.765663	1.08275	No	PREDICTED: heme oxygenase 1, chloroplastic-like	Sesamum indicum	NA	NA	NA	NA	NA
TR2646|c0_g2_i1	82	96	0.22741	0.765619	1.08284	No	PREDICTED: coatomer subunit beta-1	Sesamum indicum	NA	NA	NA	NA	NA
TR39952|c2_g1_i3	82	96	0.22741	0.765619	1.08298	No	PREDICTED: mannose-1-phosphate guanyltransferase alpha-B	Sesamum indicum	NA	NA	NA	NA	NA
TR43434|c1_g1_i8	82	96	0.22741	0.765619	1.08277	No	NA	NA	NA	NA	NA	NA	NA
TR25605|c0_g1_i2	96	82	-0.22741	0.765619	1.08279	No	NA	NA	NA	NA	NA	NA	NA
TR30315|c0_g3_i5	96	82	-0.22741	0.765619	1.08282	No	PREDICTED: protein DEHYDRATION-INDUCED 19 homolog 5-like isoform X1	Sesamum indicum	NA	NA	NA	NA	NA
TR34102|c0_g2_i3	96	82	-0.22741	0.765619	1.08271	No	PREDICTED: RING-H2 finger protein ATL52-like	Sesamum indicum	NA	NA	NA	NA	NA
TR35086|c0_g1_i9	96	82	-0.22741	0.765619	1.08287	No	PREDICTED: F-box protein At1g61340-like	Sesamum indicum	NA	NA	NA	NA	NA
TR40847|c0_g1_i6	96	82	-0.22741	0.765619	1.0829	No	NA	NA	NA	NA	NA	NA	NA
TR41842|c0_g1_i3	96	82	-0.22741	0.765619	1.08292	No	NA	NA	NA	NA	NA	NA	NA
TR43140|c1_g1_i6	96	82	-0.22741	0.765619	1.08295	No	PREDICTED: clustered mitochondria protein-like isoform X1	Sesamum indicum	NA	NA	NA	NA	NA
TR7957|c0_g1_i4	96	82	-0.22741	0.765619	1.08274	No	PREDICTED: mitogen-activated protein kinase kinase 2	Sesamum indicum	NA	NA	NA	NA	NA
TR29391|c1_g1_i1	68	80	0.234465	0.765548	1.08345	No	PREDICTED: microtubule-associated protein RP/EB family member 1B	Sesamum indicum	NA	NA	NA	NA	NA
TR33846|c0_g2_i1	68	80	0.234465	0.765548	1.08293	No	PREDICTED: deSI-like protein At4g17486	Sesamum indicum	NA	NA	NA	NA	NA
TR33983|c0_g1_i5	68	80	0.234465	0.765548	1.08295	No	hypothetical protein MIMGU_mgv1a010691mg	Mimulus guttatus	NA	NA	metal ion binding[GO:0046872]	NA	NA
TR35602|c0_g4_i3	68	80	0.234465	0.765548	1.08298	No	PREDICTED: dof zinc finger protein DOF5.1	Sesamum indicum	NA	NA	NA	NA	NA
TR37259|c0_g2_i8	68	80	0.234465	0.765548	1.08301	No	PREDICTED: homeobox-leucine zipper protein REVOLUTA-like	Sesamum indicum	NA	NA	NA	NA	NA
TR38888|c0_g3_i5	68	80	0.234465	0.765548	1.08303	No	PREDICTED: probable receptor-like protein kinase At5g15080	Sesamum indicum	NA	NA	NA	NA	NA
TR39003|c0_g3_i6	68	80	0.234465	0.765548	1.0829	No	NA	NA	NA	NA	NA	NA	NA
TR40672|c0_g4_i2	68	80	0.234465	0.765548	1.08309	No	NA	NA	NA	NA	NA	NA	NA
TR41892|c0_g1_i1	68	80	0.234465	0.765548	1.08311	No	PREDICTED: cytokinin dehydrogenase 6-like	Sesamum indicum	NA	NA	NA	NA	NA
TR42788|c1_g3_i2	68	80	0.234465	0.765548	1.08314	No	PREDICTED: SWI/SNF complex component SNF12 homolog	Sesamum indicum	NA	NA	NA	NA	NA
TR42864|c2_g3_i2	68	80	0.234465	0.765548	1.08316	No	PREDICTED: hexokinase-1	Sesamum indicum	NA	NA	NA	NA	NA
TR43280|c0_g4_i7	68	80	0.234465	0.765548	1.08319	No	PREDICTED: pentatricopeptide repeat-containing protein At5g47360	Sesamum indicum	NA	NA	NA	NA	NA
TR43498|c0_g4_i1	68	80	0.234465	0.765548	1.08322	No	NA	NA	NA	NA	NA	NA	NA
TR43757|c2_g2_i5	68	80	0.234465	0.765548	1.08324	No	PREDICTED: probable alanine--tRNA ligase, chloroplastic isoform X2	Sesamum indicum	NA	NA	NA	NA	NA
TR8125|c1_g5_i3	68	80	0.234465	0.765548	1.08327	No	hypothetical protein MIMGU_mgv1a003208mg	Mimulus guttatus	NA	protein ubiquitination[GO:0016567]	nucleic acid binding[GO:0003676] ; zinc ion binding[GO:0008270] ; ubiquitin-protein transferase activity[GO:0004842]	NA	NA
TR33415|c0_g3_i8	80	68	-0.234465	0.765548	1.0833	No	PREDICTED: uncharacterized protein LOC106355853	Brassica napus	NA	NA	NA	NA	NA
TR38377|c0_g2_i1	80	68	-0.234465	0.765548	1.08332	No	NA	NA	NA	NA	NA	NA	NA
TR40195|c1_g5_i1	80	68	-0.234465	0.765548	1.08335	No	PREDICTED: uncharacterized protein LOC105163737	Sesamum indicum	NA	NA	NA	NA	NA
TR41439|c0_g3_i1	80	68	-0.234465	0.765548	1.08337	No	NA	NA	NA	NA	NA	NA	NA
TR42709|c0_g3_i2	80	68	-0.234465	0.765548	1.0834	No	PREDICTED: ankyrin repeat-containing protein At3g12360-like	Sesamum indicum	NA	NA	NA	NA	NA
TR43278|c0_g3_i7	80	68	-0.234465	0.765548	1.08343	No	PREDICTED: LOW QUALITY PROTEIN: ATP-dependent Clp protease ATP-binding subunit clpX-like, mitochondrial	Sesamum indicum	NA	NA	NA	NA	NA
TR44163|c1_g1_i1	80	68	-0.234465	0.765548	1.08306	No	hypothetical protein OsJ_16493	Oryza sativa Japonica Group	NA	protein phosphorylation[GO:0006468]	protein kinase activity[GO:0004672] ; ATP binding[GO:0005524]	NA	NA
TR41373|c1_g5_i1	458	520	0.183164	0.765499	1.08341	No	PREDICTED: lysosomal beta glucosidase-like	Sesamum indicum	NA	NA	NA	NA	NA
TR2328|c0_g1_i4	96	112	0.222392	0.765383	1.08351	No	PREDICTED: heterogeneous nuclear ribonucleoprotein 1-like	Sesamum indicum	NA	NA	NA	NA	NA
TR32247|c0_g8_i1	96	112	0.222392	0.765383	1.0833	No	NA	NA	NA	NA	NA	NA	NA
TR37133|c0_g4_i1	96	112	0.222392	0.765383	1.08327	No	Os04g0661900	Oryza sativa Japonica Group	NA	proteasome-mediated ubiquitin-dependent protein catabolic process[GO:0043161]	NA	proteasome complex[GO:0000502] ; cytoplasmic, membrane-bounded vesicle[GO:0016023]	NA
TR39900|c0_g1_i1	96	112	0.222392	0.765383	1.08335	No	PREDICTED: uncharacterized protein LOC105172385	Sesamum indicum	NA	NA	NA	NA	NA
TR24987|c0_g1_i1	112	96	-0.222392	0.765383	1.08338	No	unnamed protein product	Coffea canephora	NA	NA	NA	NA	NA
TR26663|c0_g1_i3	112	96	-0.222392	0.765383	1.0834	No	unknown	Zea mays	NA	metabolic process[GO:0008152]	transferase activity, transferring acyl groups[GO:0016746]	NA	NA
TR33305|c3_g1_i7	112	96	-0.222392	0.765383	1.08333	No	hypothetical protein MIMGU_mgv1a005311mg	Mimulus guttatus	NA	drug transmembrane transport[GO:0006855]	antiporter activity[GO:0015297] ; drug transmembrane transporter activity[GO:0015238]	integral component of membrane[GO:0016021]	NA
TR38956|c0_g2_i3	112	96	-0.222392	0.765383	1.08346	No	hypothetical protein MIMGU_mgv1a023226mg	Mimulus guttatus	NA	DNA replication[GO:0006260] ; DNA recombination[GO:0006310] ; DNA repair[GO:0006281]	DNA binding[GO:0003677] ; zinc ion binding[GO:0008270]	nucleus[GO:0005634]	NA
TR39244|c0_g1_i1	112	96	-0.222392	0.765383	1.08348	No	PREDICTED: uncharacterized protein LOC105178046 isoform X1	Sesamum indicum	NA	NA	NA	NA	NA
TR8253|c0_g1_i2	112	96	-0.222392	0.765383	1.08343	No	PREDICTED: kinesin-like calmodulin-binding protein homolog	Sesamum indicum	NA	NA	NA	NA	NA
TR37121|c0_g3_i5	218	250	0.1976	0.765367	1.08351	No	PREDICTED: phosphoglycolate phosphatase 2	Sesamum indicum	NA	NA	NA	NA	NA
TR2980|c0_g1_i3	202	232	0.19977	0.765347	1.08351	No	PREDICTED: 2-isopropylmalate synthase A-like	Sesamum indicum	NA	NA	NA	NA	NA
TR40758|c1_g1_i3	202	232	0.19977	0.765347	1.08354	No	PREDICTED: polyadenylate-binding protein RBP47	Sesamum indicum	NA	NA	NA	NA	NA
TR36790|c0_g1_i2	232	202	-0.19977	0.765347	1.08356	No	PREDICTED: alpha-(1,4)-fucosyltransferase-like	Sesamum indicum	NA	NA	NA	NA	NA
TR35104|c1_g4_i2	2260	1974	-0.195201	0.7653	1.08352	No	PREDICTED: cysteine synthase, chloroplastic/chromoplastic isoform X1	Sesamum indicum	NA	NA	NA	NA	NA
TR37001|c0_g5_i2	1666	1902	0.191129	0.765296	1.08354	No	fructose-bisphosphate aldolase	Genlisea aurea	NA	glycolytic process[GO:0006096]	fructose-bisphosphate aldolase activity[GO:0004332]	NA	map00030:Pentose phosphate pathway(aldolase[ec:4.1.2.13]) ; map01130:Biosynthesis of antibiotics(aldolase[ec:4.1.2.13]) ; map00051:Fructose and mannose metabolism(aldolase[ec:4.1.2.13]) ; map00710:Carbon fixation in photosynthetic organisms(aldolase[ec:4.1.2.13]) ; map00010:Glycolysis / Gluconeogenesis(aldolase[ec:4.1.2.13]) ; map00680:Methane metabolism(aldolase[ec:4.1.2.13])
TR30515|c2_g7_i3	234	268	0.195724	0.765284	1.08355	No	PREDICTED: uncharacterized protein LOC105179373	Sesamum indicum	NA	NA	NA	NA	NA
TR34844|c0_g4_i2	268	234	-0.195724	0.765284	1.08358	No	PREDICTED: uncharacterized protein LOC105175752	Sesamum indicum	NA	NA	NA	NA	NA
TR38352|c0_g1_i5	484	426	-0.184154	0.765261	1.08357	No	PREDICTED: putative glycosyltransferase 5	Sesamum indicum	NA	NA	NA	NA	NA
TR31127|c0_g1_i1	728	642	-0.181365	0.765167	1.08347	No	PREDICTED: transcription elongation factor 1 homolog	Sesamum indicum	NA	NA	NA	NA	NA
TR43051|c0_g3_i1	728	642	-0.181365	0.765167	1.08349	No	PREDICTED: cirhin	Sesamum indicum	NA	NA	NA	NA	NA
TR39906|c0_g2_i6	250	286	0.194087	0.765158	1.08351	No	PREDICTED: 3-isopropylmalate dehydrogenase, chloroplastic-like	Sesamum indicum	NA	NA	NA	NA	NA
TR35470|c0_g3_i1	286	250	-0.194087	0.765158	1.08353	No	unknown	Medicago truncatula	NA	proteolysis involved in cellular protein catabolic process[GO:0051603]	threonine-type endopeptidase activity[GO:0004298]	cytoplasm[GO:0005737] ; proteasome core complex[GO:0005839] ; nucleus[GO:0005634]	NA
TR43758|c1_g6_i2	186	214	0.202308	0.765133	1.08355	No	PREDICTED: LOW QUALITY PROTEIN: homeobox-leucine zipper protein ATHB-15	Sesamum indicum	NA	NA	NA	NA	NA
TR41226|c1_g4_i4	214	186	-0.202308	0.765133	1.08352	No	PREDICTED: serine/threonine-protein kinase MHK-like	Sesamum indicum	NA	NA	NA	NA	NA
TR43146|c1_g1_i3	214	186	-0.202308	0.765133	1.08357	No	PREDICTED: CCAAT/enhancer-binding protein zeta	Sesamum indicum	NA	NA	NA	NA	NA
TR44217|c0_g4_i2	214	186	-0.202308	0.765133	1.0836	No	PREDICTED: uncharacterized protein LOC105161066 isoform X2	Sesamum indicum	NA	NA	NA	NA	NA
TR44394|c0_g1_i2	214	186	-0.202308	0.765133	1.08363	No	PREDICTED: uncharacterized protein LOC105170457	Sesamum indicum	NA	NA	NA	NA	NA
TR40004|c1_g1_i3	266	304	0.192645	0.765033	1.08351	No	NA	NA	NA	NA	NA	NA	NA
TR42112|c0_g2_i4	304	266	-0.192645	0.765033	1.08354	No	NA	NA	NA	NA	NA	NA	NA
TR35779|c0_g1_i3	140	162	0.210567	0.765023	1.08355	No	PREDICTED: magnesium transporter MRS2-I-like	Sesamum indicum	NA	NA	NA	NA	NA
TR32070|c0_g1_i4	378	430	0.18595	0.765006	1.08355	No	jasmonate ZIM-domain protein 1	Salvia miltiorrhiza	NA	NA	NA	NA	NA
TR30303|c0_g1_i4	346	394	0.187424	0.764911	1.08344	No	PREDICTED: trihelix transcription factor ASIL1-like	Sesamum indicum	NA	NA	NA	NA	NA
TR42878|c0_g2_i1	376	330	-0.188267	0.764887	1.08344	No	PREDICTED: alpha-N-acetylglucosaminidase	Sesamum indicum	NA	NA	NA	NA	NA
TR2795|c0_g1_i5	298	340	0.190222	0.764885	1.08346	No	PREDICTED: E3 ubiquitin-protein ligase MARCH11 isoform X1	Sesamum indicum	NA	NA	NA	NA	NA
TR26696|c0_g3_i3	340	298	-0.190222	0.764885	1.08349	No	PREDICTED: uncharacterized protein LOC105174944	Sesamum indicum	NA	NA	NA	NA	NA
TR43944|c1_g1_i1	340	298	-0.190222	0.764885	1.08351	No	PREDICTED: uncharacterized protein LOC105177410	Sesamum indicum	NA	NA	NA	NA	NA
TR2382|c0_g1_i2	778	686	-0.181562	0.764828	1.08346	No	PREDICTED: uncharacterized protein LOC105163833	Sesamum indicum	NA	NA	NA	NA	NA
TR34129|c0_g1_i1	2856	2482	-0.202493	0.764683	1.08328	No	unnamed protein product	Coffea canephora	NA	glycolytic process[GO:0006096]	potassium ion binding[GO:0030955] ; pyruvate kinase activity[GO:0004743] ; magnesium ion binding[GO:0000287] ; kinase activity[GO:0016301]	NA	map01130:Biosynthesis of antibiotics(kinase[ec:2.7.1.40]) ; map00620:Pyruvate metabolism(kinase[ec:2.7.1.40]) ; map00010:Glycolysis / Gluconeogenesis(kinase[ec:2.7.1.40]) ; map00230:Purine metabolism(kinase[ec:2.7.1.40])
TR30142|c0_g2_i2	110	128	0.21864	0.764616	1.08337	No	NA	NA	NA	NA	NA	NA	NA
TR31957|c0_g1_i7	110	128	0.21864	0.764616	1.08339	No	NA	NA	NA	NA	NA	NA	NA
TR40900|c0_g7_i1	110	128	0.21864	0.764616	1.08326	No	PREDICTED: protein NRT1/ PTR FAMILY 3.1-like	Sesamum indicum	NA	NA	NA	NA	NA
TR41684|c1_g1_i4	110	128	0.21864	0.764616	1.08329	No	PREDICTED: protein S-acyltransferase 24-like	Sesamum indicum	NA	NA	NA	NA	NA
TR43348|c0_g2_i3	110	128	0.21864	0.764616	1.08332	No	PREDICTED: regulator of nonsense transcripts 1 homolog	Sesamum indicum	NA	NA	NA	NA	NA
TR34110|c1_g7_i2	128	110	-0.21864	0.764616	1.08334	No	PREDICTED: probable protein phosphatase 2C 71	Erythranthe guttatus	NA	NA	NA	NA	NA
TR38576|c0_g3_i3	128	110	-0.21864	0.764616	1.08321	No	PREDICTED: UBP1-associated protein 2C-like isoform X1	Sesamum indicum	NA	NA	NA	NA	NA
TR7658|c7_g8_i2	128	110	-0.21864	0.764616	1.08324	No	hypothetical protein MIMGU_mgv1a021816mg	Mimulus guttatus	NA	response to auxin[GO:0009733]	NA	NA	NA
TR37288|c0_g3_i1	170	196	0.205319	0.764587	1.08354	No	PREDICTED: serine protease SPPA, chloroplastic-like isoform X2	Sesamum indicum	NA	NA	NA	NA	NA
TR39886|c1_g4_i7	170	196	0.205319	0.764587	1.08341	No	PREDICTED: uncharacterized protein LOC100265963	Vitis vinifera	NA	NA	NA	NA	NA
TR40362|c0_g1_i1	170	196	0.205319	0.764587	1.08343	No	hypothetical protein MIMGU_mgv1a003401mg	Mimulus guttatus	NA	intracellular signal transduction[GO:0035556] ; lipid catabolic process[GO:0016042]	signal transducer activity[GO:0004871] ; phosphatidylinositol phospholipase C activity[GO:0004435]	intracellular[GO:0005622]	map04070:Phosphatidylinositol signaling system(phospholipase C[ec:3.1.4.11]) ; map00562:Inositol phosphate metabolism(phospholipase C[ec:3.1.4.11])
TR36039|c0_g1_i6	196	170	-0.205319	0.764587	1.08346	No	unnamed protein product	Coffea canephora	NA	metabolic process[GO:0008152]	hydrolase activity, acting on ester bonds[GO:0016788]	NA	NA
TR36220|c0_g1_i3	196	170	-0.205319	0.764587	1.08348	No	hypothetical protein MIMGU_mgv1a009837mg	Mimulus guttatus	NA	mitochondrion organization[GO:0007005] ; protein ubiquitination[GO:0016567]	zinc ion binding[GO:0008270] ; ubiquitin-protein transferase activity[GO:0004842]	NA	NA
TR37426|c0_g2_i6	196	170	-0.205319	0.764587	1.08338	No	cytochrome P450 CYP75B79	Salvia miltiorrhiza	NA	oxidation-reduction process[GO:0055114]	heme binding[GO:0020037] ; oxidoreductase activity, acting on paired donors, with incorporation or reduction of molecular oxygen[GO:0016705] ; monooxygenase activity[GO:0004497] ; iron ion binding[GO:0005506]	NA	NA
TR38768|c0_g5_i1	196	170	-0.205319	0.764587	1.08351	No	hypothetical protein CISIN_1g015598mg	Citrus sinensis	NA	regulation of signal transduction[GO:0009966]	NA	NA	NA
TR41986|c0_g1_i1	196	170	-0.205319	0.764587	1.08356	No	PREDICTED: putative tRNA pseudouridine synthase Pus10	Sesamum indicum	NA	NA	NA	NA	NA
TR43390|c1_g7_i3	196	170	-0.205319	0.764587	1.08359	No	PREDICTED: protein disulfide-isomerase-like	Sesamum indicum	NA	NA	NA	NA	NA
TR42273|c0_g4_i7	692	610	-0.181963	0.764574	1.0836	No	hydroxymethylglutaryl-CoA synthase	Lavandula angustifolia	Lamiaceae	isoprenoid biosynthetic process[GO:0008299]	hydroxymethylglutaryl-CoA synthase activity[GO:0004421]	NA	map00072:Synthesis and degradation of ketone bodies(synthase[ec:2.3.3.10]) ; map01130:Biosynthesis of antibiotics(synthase[ec:2.3.3.10]) ; map00280:Valine, leucine and isoleucine degradation(synthase[ec:2.3.3.10]) ; map00650:Butanoate metabolism(synthase[ec:2.3.3.10]) ; map00900:Terpenoid backbone biosynthesis(synthase[ec:2.3.3.10])
TR44563|c1_g1_i2	440	500	0.184425	0.764446	1.08344	No	PREDICTED: phospholipase D gamma 1-like	Sesamum indicum	NA	NA	NA	NA	NA
TR34506|c0_g4_i2	464	408	-0.185556	0.76417	1.08308	No	PREDICTED: double-stranded RNA-binding protein 2-like	Sesamum indicum	NA	NA	NA	NA	NA
TR4032|c0_g2_i1	464	408	-0.185556	0.76417	1.0831	No	hypothetical protein MIMGU_mgv1a020350mg, partial	Mimulus guttatus	NA	NA	NA	NA	NA
TR43386|c0_g1_i3	2890	2510	-0.203382	0.764105	1.08304	No	PREDICTED: hepatoma-derived growth factor-related protein 2	Sesamum indicum	NA	NA	NA	NA	NA
TR44003|c0_g1_i1	876	772	-0.18233	0.764057	1.083	No	PREDICTED: regulator of nonsense transcripts UPF2 isoform X2	Sesamum indicum	NA	NA	NA	NA	NA
TR37411|c0_g7_i3	3124	2708	-0.206167	0.763919	1.08283	No	hydroxypyruvate reductase	Solenostemon scutellarioides	NA	oxidation-reduction process[GO:0055114]	NAD binding[GO:0051287] ; glycerate dehydrogenase activity[GO:0008465]	NA	map00260:Glycine, serine and threonine metabolism(dehydrogenase[ec:1.1.1.29]) ; map00630:Glyoxylate and dicarboxylate metabolism(dehydrogenase[ec:1.1.1.29]) ; map01130:Biosynthesis of antibiotics(dehydrogenase[ec:1.1.1.29]) ; map00680:Methane metabolism(dehydrogenase[ec:1.1.1.29])
TR37023|c0_g1_i7	534	470	-0.184179	0.763888	1.08281	No	hypothetical protein MIMGU_mgv1a005411mg	Mimulus guttatus	NA	NA	NA	integral component of membrane[GO:0016021]	NA
TR32051|c0_g2_i8	344	392	0.188445	0.763758	1.08265	No	PREDICTED: RNA-binding protein Nova-2-like	Sesamum indicum	NA	NA	NA	NA	NA
TR30819|c1_g1_i2	516	586	0.18353	0.763707	1.08263	No	hypothetical protein MIMGU_mgv1a014822mg	Mimulus guttatus	NA	NA	NA	NA	NA
TR35324|c0_g1_i2	516	586	0.18353	0.763707	1.08261	No	PREDICTED: lys-63-specific deubiquitinase BRCC36	Sesamum indicum	NA	NA	NA	NA	NA
TR43749|c1_g5_i2	374	328	-0.189342	0.763684	1.08263	No	gigantea, partial	Arachis diogoi	NA	regulation of photoperiodism, flowering[GO:2000028]	NA	NA	NA
TR43476|c0_g1_i1	312	356	0.190331	0.76362	1.08256	No	PREDICTED: probable serine/threonine protein kinase IRE4 isoform X1	Sesamum indicum	NA	NA	NA	NA	NA
TR30101|c0_g1_i6	154	178	0.208947	0.763604	1.08259	No	hypothetical protein MIMGU_mgv1a000265mg	Mimulus guttatus	NA	transcription, DNA-templated[GO:0006351]	DNA binding[GO:0003677]	nucleus[GO:0005634]	NA
TR3464|c0_g1_i1	154	178	0.208947	0.763604	1.08262	No	PREDICTED: uncharacterized protein LOC105958003 isoform X2	Erythranthe guttatus	NA	NA	NA	NA	NA
TR43453|c2_g5_i2	178	154	-0.208947	0.763604	1.08264	No	NA	NA	NA	NA	NA	NA	NA
TR8262|c1_g2_i2	178	154	-0.208947	0.763604	1.08257	No	PREDICTED: alpha/beta hydrolase domain-containing protein 17B-like	Sesamum indicum	NA	NA	NA	NA	NA
TR38194|c0_g7_i1	2190	1912	-0.195848	0.763587	1.08265	No	PREDICTED: ubiquitin receptor RAD23c-like	Sesamum indicum	NA	NA	NA	NA	NA
TR38751|c0_g3_i1	302	264	-0.194011	0.763585	1.08267	No	hypothetical protein M569_04657, partial	Genlisea aurea	NA	NA	NA	NA	NA
TR3462|c1_g2_i2	338	296	-0.191426	0.763568	1.08267	No	hypothetical protein MIMGU_mgv1a023111mg	Mimulus guttatus	NA	NA	NA	NA	NA
TR24211|c0_g2_i3	280	320	0.192645	0.763557	1.08271	No	hypothetical protein MIMGU_mgv1a014203mg	Mimulus guttatus	NA	regulation of transcription, DNA-templated[GO:0006355]	sequence-specific DNA binding[GO:0043565] ; protein heterodimerization activity[GO:0046982]	nucleus[GO:0005634]	NA
TR40770|c0_g3_i4	320	280	-0.192645	0.763557	1.08268	No	PREDICTED: uncharacterized protein LOC105162855	Sesamum indicum	NA	NA	NA	NA	NA
TR30316|c0_g3_i3	124	144	0.215729	0.763502	1.08268	No	PREDICTED: uncharacterized protein At3g49720-like	Sesamum indicum	NA	NA	NA	NA	NA
TR33193|c1_g5_i1	124	144	0.215729	0.763502	1.08274	No	PREDICTED: histone H2AX	Sesamum indicum	NA	NA	NA	NA	NA
TR34249|c0_g2_i2	124	144	0.215729	0.763502	1.08271	No	PREDICTED: peptidyl-prolyl cis-trans isomerase CYP18-2	Sesamum indicum	NA	NA	NA	NA	NA
TR34976|c0_g3_i1	124	144	0.215729	0.763502	1.08266	No	Os09g0421700	Oryza sativa Japonica Group	NA	NA	binding[GO:0005488]	NA	NA
TR40890|c0_g5_i1	124	144	0.215729	0.763502	1.08276	No	PREDICTED: zinc finger CCCH domain-containing protein 44-like isoform X2	Sesamum indicum	NA	NA	NA	NA	NA
TR35840|c2_g7_i5	144	124	-0.215729	0.763502	1.08279	No	NA	NA	NA	NA	NA	NA	NA
TR38279|c1_g1_i2	144	124	-0.215729	0.763502	1.08282	No	PREDICTED: pyruvate kinase, cytosolic isozyme-like	Solanum tuberosum	NA	glycolytic process[GO:0006096]	potassium ion binding[GO:0030955] ; pyruvate kinase activity[GO:0004743] ; magnesium ion binding[GO:0000287] ; kinase activity[GO:0016301]	NA	map01130:Biosynthesis of antibiotics(kinase[ec:2.7.1.40]) ; map00620:Pyruvate metabolism(kinase[ec:2.7.1.40]) ; map00010:Glycolysis / Gluconeogenesis(kinase[ec:2.7.1.40]) ; map00230:Purine metabolism(kinase[ec:2.7.1.40])
TR31876|c0_g4_i1	200	230	0.201634	0.763468	1.08292	No	PREDICTED: protein GDAP2 homolog	Sesamum indicum	NA	NA	NA	NA	NA
TR38123|c3_g10_i2	200	230	0.201634	0.763468	1.08285	No	PREDICTED: fumarylacetoacetase	Sesamum indicum	NA	NA	NA	NA	NA
TR33133|c0_g7_i2	230	200	-0.201634	0.763468	1.08279	No	NA	NA	NA	NA	NA	NA	NA
TR34016|c0_g1_i3	230	200	-0.201634	0.763468	1.08287	No	PREDICTED: copper chaperone for superoxide dismutase, chloroplastic/cytosolic	Sesamum indicum	NA	NA	NA	NA	NA
TR41123|c0_g4_i1	230	200	-0.201634	0.763468	1.0829	No	PREDICTED: GPI transamidase component PIG-S	Sesamum indicum	NA	NA	NA	NA	NA
TR42849|c0_g1_i1	230	200	-0.201634	0.763468	1.08282	No	PREDICTED: threonine dehydratase biosynthetic, chloroplastic isoform X2	Erythranthe guttatus	NA	NA	NA	NA	NA
TR30295|c0_g1_i1	568	500	-0.183963	0.763467	1.08295	No	PREDICTED: BRASSINOSTEROID INSENSITIVE 1-associated receptor kinase 1	Sesamum indicum	NA	NA	NA	NA	NA
TR44462|c0_g1_i1	1552	1772	0.19125	0.763372	1.08284	No	PREDICTED: activating signal cointegrator 1 complex subunit 3	Sesamum indicum	NA	NA	NA	NA	NA
TR41807|c1_g1_i1	1226	1078	-0.185602	0.76313	1.08252	No	PREDICTED: phospholipid-transporting ATPase 3	Sesamum indicum	NA	NA	NA	NA	NA
TR39647|c1_g1_i4	184	212	0.204358	0.763081	1.08251	No	PREDICTED: uncharacterized protein LOC105178025	Sesamum indicum	NA	NA	NA	NA	NA
TR42557|c1_g3_i8	212	184	-0.204358	0.763081	1.08248	No	PREDICTED: CTP synthase	Erythranthe guttatus	NA	NA	NA	NA	NA
TR42720|c0_g4_i3	212	184	-0.204358	0.763081	1.08253	No	hypothetical protein MIMGU_mgv1a005181mg	Mimulus guttatus	NA	NA	NA	NA	NA
TR44256|c1_g2_i2	212	184	-0.204358	0.763081	1.08256	No	PREDICTED: chaperone protein ClpB1	Sesamum indicum	NA	NA	NA	NA	NA
TR41072|c1_g5_i3	636	560	-0.1836	0.762957	1.08241	No	PREDICTED: poly(rC)-binding protein 3-like	Sesamum indicum	NA	NA	NA	NA	NA
TR36475|c0_g2_i7	9222	7666	-0.266606	0.762852	1.08229	No	hypothetical protein MIMGU_mgv1a005057mg	Mimulus guttatus	NA	NA	NA	NA	NA
TR34881|c2_g3_i1	670	590	-0.183446	0.762841	1.0823	No	PREDICTED: casein kinase I-like	Sesamum indicum	NA	NA	NA	NA	NA
TR26689|c0_g1_i1	452	514	0.185446	0.762784	1.08224	No	unnamed protein product	Coffea canephora	NA	ATP synthesis coupled proton transport[GO:0015986]	proton-transporting ATPase activity, rotational mechanism[GO:0046961] ; proton-transporting ATP synthase activity, rotational mechanism[GO:0046933]	mitochondrial proton-transporting ATP synthase complex, catalytic core F(1)[GO:0000275]	NA
TR20472|c0_g1_i2	54	64	0.245112	0.762658	1.0827	No	RabGAP/TBC domain-containing protein, partial	Manihot esculenta	NA	NA	NA	NA	NA
TR2439|c0_g1_i2	54	64	0.245112	0.762658	1.08212	No	hypothetical protein MIMGU_mgv1a011910mg	Mimulus guttatus	NA	carbohydrate metabolic process[GO:0005975] ; pentose-phosphate shunt[GO:0006098]	6-phosphogluconolactonase activity[GO:0017057]	NA	map00030:Pentose phosphate pathway(phosphogluconolactonase[ec:3.1.1.31]) ; map01130:Biosynthesis of antibiotics(phosphogluconolactonase[ec:3.1.1.31])
TR26085|c0_g1_i1	54	64	0.245112	0.762658	1.08214	No	hypothetical protein MIMGU_mgv1a000548mg	Mimulus guttatus	NA	NA	NA	NA	NA
TR2861|c1_g1_i1	54	64	0.245112	0.762658	1.08217	No	NA	NA	NA	NA	NA	NA	NA
TR29586|c0_g1_i1	54	64	0.245112	0.762658	1.0822	No	PREDICTED: U-box domain-containing protein 11-like	Sesamum indicum	NA	NA	NA	NA	NA
TR33745|c1_g1_i2	54	64	0.245112	0.762658	1.08222	No	PREDICTED: protein IQ-DOMAIN 1-like	Sesamum indicum	NA	NA	NA	NA	NA
TR35817|c1_g6_i3	54	64	0.245112	0.762658	1.08225	No	PREDICTED: prefoldin subunit 6	Sesamum indicum	NA	NA	NA	NA	NA
TR37015|c1_g1_i1	54	64	0.245112	0.762658	1.08228	No	PREDICTED: E3 ubiquitin-protein ligase SINAT3-like	Nicotiana tomentosiformis	NA	NA	NA	NA	NA
TR37487|c0_g2_i1	54	64	0.245112	0.762658	1.0823	No	PREDICTED: probable plastid-lipid-associated protein 7, chloroplastic	Sesamum indicum	NA	NA	NA	NA	NA
TR38745|c0_g3_i5	54	64	0.245112	0.762658	1.08233	No	PREDICTED: pinin	Sesamum indicum	NA	NA	NA	NA	NA
TR39891|c1_g5_i3	54	64	0.245112	0.762658	1.08235	No	PREDICTED: rho GTPase-activating protein 5-like	Sesamum indicum	NA	NA	NA	NA	NA
TR39892|c0_g1_i2	54	64	0.245112	0.762658	1.08238	No	hypothetical protein MIMGU_mgv1a005517mg	Mimulus guttatus	NA	NA	NA	membrane[GO:0016020]	NA
TR40026|c0_g8_i2	54	64	0.245112	0.762658	1.08241	No	PREDICTED: LOW QUALITY PROTEIN: nuclear pore complex protein NUP88	Sesamum indicum	NA	NA	NA	NA	NA
TR42208|c1_g2_i1	54	64	0.245112	0.762658	1.08243	No	PREDICTED: mitochondrial Rho GTPase 1	Sesamum indicum	NA	NA	NA	NA	NA
TR43127|c2_g5_i1	54	64	0.245112	0.762658	1.08246	No	PREDICTED: putative late blight resistance protein homolog R1A-10	Sesamum indicum	NA	NA	NA	NA	NA
TR28958|c0_g1_i1	64	54	-0.245112	0.762658	1.08249	No	PREDICTED: uncharacterized protein LOC105173090	Sesamum indicum	NA	NA	NA	NA	NA
TR29869|c0_g1_i3	64	54	-0.245112	0.762658	1.08251	No	hypothetical protein PHAVU_007G204400g	Phaseolus vulgaris	NA	carbohydrate metabolic process[GO:0005975]	NA	NA	NA
TR30403|c0_g1_i4	64	54	-0.245112	0.762658	1.08254	No	PREDICTED: uncharacterized protein LOC105166328 isoform X1	Sesamum indicum	NA	NA	NA	NA	NA
TR32658|c0_g1_i3	64	54	-0.245112	0.762658	1.08256	No	PREDICTED: mitochondrial inner membrane protease subunit 2	Sesamum indicum	NA	NA	NA	NA	NA
TR32751|c4_g1_i2	64	54	-0.245112	0.762658	1.08259	No	hypothetical protein EUGRSUZ_H006462, partial	Eucalyptus grandis	NA	cellulose biosynthetic process[GO:0030244]	cellulose synthase (UDP-forming) activity[GO:0016760]	membrane[GO:0016020]	map00500:Starch and sucrose metabolism(synthase (UDP-forming)[ec:2.4.1.12])
TR33696|c0_g2_i6	64	54	-0.245112	0.762658	1.08262	No	NA	NA	NA	NA	NA	NA	NA
TR34070|c0_g1_i3	64	54	-0.245112	0.762658	1.08264	No	NA	NA	NA	NA	NA	NA	NA
TR34698|c0_g2_i1	64	54	-0.245112	0.762658	1.08267	No	NA	NA	NA	NA	NA	NA	NA
TR36328|c1_g2_i7	64	54	-0.245112	0.762658	1.08291	No	PREDICTED: protein disulfide isomerase-like 2-3	Sesamum indicum	NA	NA	NA	NA	NA
TR37150|c1_g1_i1	64	54	-0.245112	0.762658	1.08272	No	NA	NA	NA	NA	NA	NA	NA
TR38747|c0_g5_i1	64	54	-0.245112	0.762658	1.08275	No	hypothetical protein MIMGU_mgv1a007527mg	Mimulus guttatus	NA	NA	NA	NA	NA
TR39898|c0_g3_i1	64	54	-0.245112	0.762658	1.08278	No	PREDICTED: polygalacturonate 4-alpha-galacturonosyltransferase-like	Nelumbo nucifera	NA	NA	NA	NA	NA
TR39959|c0_g9_i1	64	54	-0.245112	0.762658	1.0828	No	hypothetical protein MIMGU_mgv1a006503mg	Mimulus guttatus	NA	magnesium ion transmembrane transport[GO:1903830] ; magnesium ion transport[GO:0015693]	magnesium ion transmembrane transporter activity[GO:0015095]	integral component of membrane[GO:0016021]	NA
TR40068|c4_g4_i1	64	54	-0.245112	0.762658	1.08283	No	hypothetical protein AMTR_s00011p00264700	Amborella trichopoda	NA	NA	NA	NA	NA
TR41720|c3_g1_i1	64	54	-0.245112	0.762658	1.08285	No	PREDICTED: uncharacterized protein LOC105969088	Erythranthe guttatus	NA	NA	NA	NA	NA
TR43328|c1_g1_i1	64	54	-0.245112	0.762658	1.08209	No	PREDICTED: uncharacterized membrane protein C2G11.09-like	Cucumis melo	NA	NA	NA	NA	NA
TR7651|c1_g2_i4	64	54	-0.245112	0.762658	1.08288	No	PREDICTED: photosystem II repair protein PSB27-H1, chloroplastic	Cucumis melo	NA	NA	NA	NA	NA
TR42187|c1_g2_i3	436	496	0.186012	0.76257	1.08281	No	telomere repeat-binding factor like-protein	Rehmannia glutinosa	NA	NA	NA	NA	NA
TR33475|c1_g1_i5	920	810	-0.183712	0.762529	1.08278	No	NA	NA	NA	NA	NA	NA	NA
TR36822|c0_g1_i10	720	634	-0.183514	0.762469	1.08272	No	PREDICTED: COP9 signalosome complex subunit 4	Erythranthe guttatus	NA	NA	NA	NA	NA
TR44692|c0_g1_i2	2794	2426	-0.203752	0.762441	1.0827	No	PREDICTED: LOW QUALITY PROTEIN: translational activator GCN1	Sesamum indicum	NA	NA	NA	NA	NA
TR35382|c0_g2_i2	548	482	-0.185143	0.762369	1.08263	No	PREDICTED: uncharacterized protein LOC105161675	Sesamum indicum	NA	NA	NA	NA	NA
TR4054|c0_g4_i3	600	528	-0.184425	0.762364	1.08265	No	PREDICTED: uncharacterized protein LOC105161706 isoform X2	Sesamum indicum	NA	NA	NA	NA	NA
[truncated: 56,392 more rows]
