# Supplementary material for: Altered Developmental and Metabolic Gene Expression in Basil Interspecific Hybrids
Source: Plants (Basel). 2022 Jul 18;11(14):1873. doi: 10.3390/plants11141873 (PMC9321874; doi:10.3390/plants11141873)
Supplement: Supplementary file 1 [file plants-11-01873-s001.zip › Table S13_DGE_F1_vs_AMPHID2.XLSX.xlsx]

## Sheet: AMPHID2 specific
TrID	AMPHID2 Readcount
TR10077|c0_g1_i1	14
TR1128|c0_g1_i1	14
TR11878|c0_g1_i1	16
TR12578|c0_g1_i1	16
TR13914|c0_g1_i1	10
TR1399|c0_g1_i1	22
TR15012|c0_g2_i1	14
TR15804|c0_g1_i1	14
TR16454|c0_g1_i1	30
TR16793|c0_g1_i1	12
TR17324|c0_g1_i1	34
TR18702|c0_g1_i1	22
TR18831|c0_g1_i1	12
TR18920|c0_g1_i1	14
TR19158|c0_g1_i1	12
TR19437|c0_g1_i1	44
TR19595|c0_g1_i1	30
TR19948|c0_g1_i1	18
TR20234|c0_g1_i1	28
TR20268|c0_g1_i1	36
TR20752|c0_g1_i1	12
TR20904|c0_g1_i1	32
TR21007|c0_g1_i3	28
TR21055|c0_g1_i6	104
TR21070|c0_g1_i1	18
TR21214|c0_g1_i1	12
TR2158|c0_g1_i1	52
TR21622|c0_g1_i1	24
TR21665|c0_g1_i1	16
TR21670|c0_g1_i1	20
TR2173|c0_g1_i3	80
TR21853|c0_g1_i2	32
TR21899|c0_g1_i1	24
TR2192|c0_g1_i1	88
TR22096|c0_g1_i1	18
TR2223|c0_g1_i1	22
TR22362|c0_g1_i1	20
TR22440|c0_g1_i1	10
TR2263|c1_g2_i1	28
TR2270|c0_g1_i1	62
TR22707|c0_g1_i1	22
TR22783|c0_g1_i1	16
TR22836|c0_g2_i1	26
TR22848|c0_g2_i1	26
TR2286|c0_g1_i2	44
TR22941|c0_g1_i2	20
TR2296|c0_g4_i1	28
TR23046|c0_g1_i1	28
TR2311|c0_g4_i1	34
TR23163|c0_g1_i1	20
TR23190|c0_g1_i2	28
TR23354|c0_g1_i3	30
TR2338|c0_g1_i3	314
TR2345|c0_g1_i1	46
TR2345|c0_g1_i2	70
TR2355|c1_g2_i5	24
TR2361|c2_g1_i4	10
TR23627|c0_g1_i2	16
TR23663|c0_g1_i1	16
TR23843|c0_g1_i1	12
TR23892|c1_g1_i1	38
TR23892|c1_g1_i2	34
TR23930|c0_g1_i1	26
TR2408|c0_g1_i10	92
TR2408|c0_g1_i9	94
TR2413|c0_g5_i1	22
TR24174|c0_g1_i2	26
TR24227|c0_g1_i3	22
TR24289|c0_g3_i2	118
TR24552|c1_g1_i2	54
TR24557|c0_g1_i5	24
TR24641|c0_g1_i1	62
TR24674|c0_g1_i2	24
TR24960|c0_g1_i2	18
TR24988|c0_g1_i1	12
TR25037|c0_g1_i2	12
TR25070|c0_g1_i1	22
TR25112|c0_g1_i1	26
TR25124|c0_g2_i3	32
TR25248|c0_g2_i1	26
TR25385|c0_g3_i1	16
TR25548|c0_g1_i3	32
TR25680|c0_g1_i1	62
TR25833|c0_g1_i2	58
TR25892|c0_g1_i1	42
TR25892|c0_g1_i2	22
TR25892|c0_g1_i3	20
TR25919|c0_g1_i2	20
TR2605|c0_g1_i2	22
TR26061|c0_g1_i2	16
TR26072|c0_g1_i2	42
TR26185|c0_g1_i3	36
TR26227|c2_g1_i1	26
TR26299|c0_g1_i3	26
TR2632|c1_g1_i1	42
TR26378|c0_g1_i2	14
TR26443|c0_g1_i1	374
TR2655|c0_g3_i1	144
TR26605|c0_g1_i1	32
TR26616|c0_g1_i3	84
TR26679|c1_g2_i4	24
TR26704|c1_g1_i3	70
TR2672|c0_g1_i1	14
TR26722|c0_g1_i2	18
TR26729|c0_g2_i1	24
TR2673|c2_g2_i2	22
TR2673|c2_g2_i6	22
TR26892|c0_g5_i1	14
TR26907|c0_g1_i2	28
TR26922|c1_g1_i5	52
TR26949|c0_g1_i3	32
TR2699|c1_g5_i1	16
TR27055|c0_g6_i1	28
TR27079|c0_g1_i1	18
TR27079|c0_g2_i1	32
TR27086|c0_g2_i1	18
TR27134|c0_g1_i1	96
TR27254|c0_g1_i3	70
TR27376|c0_g1_i1	18
TR27472|c0_g2_i1	14
TR27494|c0_g1_i1	22
TR27519|c0_g1_i3	44
TR27527|c0_g1_i3	12
TR27648|c0_g3_i1	20
TR2769|c0_g1_i2	32
TR27744|c0_g1_i1	16
TR2778|c0_g2_i9	16
TR27818|c1_g1_i1	34
TR27831|c0_g1_i2	46
TR27860|c0_g1_i3	66
TR28035|c0_g1_i1	56
TR28081|c0_g1_i1	94
TR28116|c0_g2_i1	30
TR28126|c1_g1_i3	48
TR28140|c0_g1_i1	20
TR28218|c0_g1_i3	60
TR28236|c0_g3_i2	28
TR28302|c0_g2_i5	68
TR2831|c0_g1_i2	36
TR2832|c0_g1_i1	18
TR28347|c0_g1_i2	50
TR28380|c0_g1_i2	26
TR28385|c0_g1_i6	20
TR28409|c0_g1_i3	46
TR28458|c0_g1_i4	12
TR2847|c1_g5_i4	52
TR2847|c1_g5_i5	44
TR28599|c1_g1_i1	12
TR28668|c0_g1_i2	14
TR2870|c0_g1_i2	42
TR28816|c1_g2_i4	30
TR28845|c0_g1_i4	58
TR28846|c0_g4_i2	122
TR28853|c0_g2_i1	20
TR28880|c0_g1_i1	14
TR28880|c0_g3_i7	30
TR28883|c0_g1_i3	36
TR28903|c0_g8_i1	32
TR28915|c0_g2_i1	14
TR28924|c0_g1_i2	22
TR28950|c0_g1_i4	18
TR28958|c0_g1_i2	32
TR28972|c0_g1_i2	84
TR2902|c0_g1_i1	52
TR2902|c0_g1_i8	26
TR29038|c0_g1_i1	60
TR29049|c0_g1_i2	14
TR29064|c0_g6_i1	32
TR29083|c0_g1_i1	18
TR29122|c0_g2_i2	108
TR29145|c0_g1_i2	32
TR2918|c0_g1_i1	48
TR29243|c0_g2_i5	16
TR29254|c2_g1_i1	30
TR29332|c0_g1_i1	26
TR29357|c0_g2_i1	50
TR29415|c0_g1_i1	66
TR29517|c0_g1_i1	30
TR29519|c0_g1_i1	16
TR29540|c0_g3_i3	48
TR29629|c1_g5_i1	48
TR29638|c0_g1_i2	78
TR29642|c0_g1_i1	34
TR29675|c0_g1_i4	26
TR2968|c0_g1_i7	64
TR29694|c0_g2_i4	16
TR2973|c0_g4_i2	28
TR2976|c0_g2_i1	16
TR29824|c0_g1_i3	16
TR29848|c0_g1_i1	30
TR29871|c0_g2_i2	80
TR29886|c0_g2_i2	86
TR29940|c1_g1_i4	20
TR29964|c0_g1_i3	36
TR30026|c0_g1_i1	80
TR30032|c0_g1_i2	78
TR30130|c1_g2_i3	60
TR30130|c1_g8_i9	60
TR30171|c0_g3_i2	38
TR30216|c0_g2_i1	76
TR30222|c0_g2_i1	16
TR3026|c1_g1_i2	24
TR30309|c0_g2_i1	16
TR30389|c0_g1_i5	52
TR30417|c0_g1_i1	46
TR30419|c0_g1_i1	32
TR30546|c0_g1_i2	26
TR30554|c0_g1_i2	38
TR30591|c0_g1_i3	68
TR30660|c0_g1_i2	50
TR30670|c0_g4_i1	12
TR30675|c0_g2_i2	70
TR30699|c1_g3_i1	68
TR30703|c0_g3_i2	26
TR30761|c0_g1_i2	124
TR3078|c0_g1_i1	28
TR30783|c0_g5_i1	80
TR3079|c0_g1_i1	22
TR30792|c0_g2_i1	12
TR30804|c2_g1_i3	38
TR30840|c0_g2_i1	26
TR30892|c0_g1_i1	78
TR30903|c0_g1_i3	32
TR30928|c0_g4_i5	32
TR30944|c0_g2_i2	22
TR30946|c0_g2_i1	50
TR30950|c0_g1_i2	22
TR30961|c0_g1_i2	56
TR30985|c0_g1_i7	64
TR31020|c0_g1_i1	54
TR31045|c0_g1_i2	20
TR31048|c0_g1_i1	18
TR3105|c1_g1_i2	12
TR31066|c0_g6_i1	1618
TR31077|c0_g2_i3	38
TR31091|c0_g4_i4	20
TR3110|c0_g1_i1	92
TR31107|c0_g4_i2	24
TR3113|c0_g2_i5	28
TR31153|c0_g1_i1	46
TR31153|c0_g1_i3	22
TR31188|c0_g1_i3	22
TR31209|c0_g1_i1	90
TR31265|c0_g1_i1	34
TR31292|c0_g1_i4	80
TR3133|c0_g1_i5	22
TR31445|c0_g1_i1	48
TR31446|c0_g2_i1	24
TR3156|c1_g6_i3	54
TR31573|c1_g4_i1	466
TR31629|c0_g1_i2	76
TR31776|c1_g1_i1	14
TR31779|c0_g1_i7	62
TR31795|c0_g1_i2	96
TR31795|c0_g1_i4	26
TR31820|c0_g10_i4	94
TR31821|c0_g1_i1	26
TR31832|c1_g1_i4	14
TR31885|c1_g1_i1	26
TR31890|c0_g6_i1	16
TR31924|c0_g2_i3	40
TR31939|c0_g2_i2	46
TR31941|c0_g2_i1	14
TR31959|c0_g3_i3	36
TR31967|c0_g1_i3	44
TR32034|c0_g4_i4	38
TR32098|c0_g2_i4	50
TR32111|c1_g1_i1	16
TR32113|c1_g3_i1	44
TR32115|c1_g2_i1	18
TR32116|c0_g1_i3	202
TR32158|c0_g1_i3	34
TR32168|c0_g3_i2	128
TR32182|c0_g3_i4	30
TR32182|c0_g3_i7	108
TR32194|c0_g1_i1	22
TR32194|c0_g3_i1	22
TR32195|c0_g2_i1	16
TR32200|c0_g2_i1	50
TR32200|c0_g3_i1	30
TR32250|c0_g5_i1	26
TR32277|c1_g8_i1	16
TR32299|c0_g1_i1	226
TR32299|c0_g1_i2	174
TR32299|c0_g1_i3	84
TR32300|c3_g1_i2	48
TR32304|c0_g3_i7	20
TR32311|c1_g2_i5	44
TR32347|c0_g2_i7	44
TR3235|c0_g2_i2	26
TR32375|c0_g1_i1	124
TR32382|c1_g1_i5	32
TR32440|c0_g4_i1	18
TR32450|c0_g1_i2	16
TR32519|c2_g4_i3	34
TR3252|c0_g1_i4	42
TR3255|c0_g1_i1	64
TR3255|c0_g1_i3	84
TR32556|c0_g1_i1	34
TR32564|c1_g2_i1	14
TR32646|c0_g1_i3	144
TR32678|c0_g2_i1	116
TR32686|c0_g2_i3	26
TR32694|c3_g4_i1	180
TR32706|c0_g1_i3	32
TR32742|c2_g1_i2	50
TR32759|c1_g3_i6	66
TR32776|c1_g2_i1	48
TR32784|c0_g5_i1	16
TR32812|c0_g2_i1	28
TR32819|c0_g1_i1	44
TR32857|c0_g1_i1	28
TR32857|c0_g1_i5	52
TR32864|c0_g5_i1	24
TR32864|c0_g6_i1	54
TR32868|c0_g1_i4	48
TR32924|c0_g9_i1	16
TR32963|c1_g1_i4	28
TR32991|c2_g1_i8	24
TR32998|c1_g2_i3	12
TR33042|c0_g1_i1	24
TR33043|c0_g1_i1	36
TR33049|c1_g1_i1	18
TR33103|c0_g1_i1	102
TR33114|c0_g3_i3	36
TR33127|c0_g1_i2	24
TR33157|c0_g2_i2	20
TR33162|c0_g1_i1	22
TR33173|c0_g1_i5	28
TR3321|c0_g5_i1	16
TR33214|c1_g3_i1	12
TR33214|c1_g4_i2	10
TR33218|c0_g1_i1	16
TR33276|c0_g1_i2	30
TR33286|c1_g1_i1	16
TR33286|c1_g4_i1	30
TR33287|c0_g6_i3	26
TR33309|c0_g2_i1	30
TR33336|c0_g3_i1	26
TR33339|c0_g1_i5	136
TR33351|c2_g3_i1	12
TR33386|c0_g6_i1	30
TR33401|c0_g2_i1	18
TR33411|c0_g3_i2	62
TR33439|c0_g13_i5	656
TR33466|c1_g2_i3	48
TR33593|c0_g4_i2	36
TR33598|c0_g1_i6	94
TR33599|c0_g2_i4	20
TR33624|c0_g1_i5	30
TR33660|c1_g4_i1	22
TR33711|c0_g1_i1	136
TR33711|c0_g1_i2	116
TR33711|c0_g1_i3	126
TR33723|c0_g1_i8	182
TR33732|c1_g2_i1	24
TR33734|c0_g1_i2	20
TR33752|c0_g1_i2	148
TR33755|c0_g1_i3	24
TR3376|c0_g1_i1	14
TR33762|c0_g2_i8	78
TR33779|c0_g2_i1	68
TR33804|c0_g1_i4	52
TR33817|c1_g2_i3	16
TR33822|c0_g2_i6	24
TR33827|c0_g2_i2	38
TR33856|c0_g1_i1	14
TR33874|c0_g1_i2	50
TR3388|c0_g1_i5	28
TR33890|c0_g1_i1	84
TR33920|c0_g1_i1	68
TR33948|c0_g5_i1	34
TR33958|c0_g1_i2	22
TR33973|c0_g1_i7	70
TR33980|c1_g1_i2	10
TR33989|c0_g2_i7	24
TR34013|c1_g1_i2	108
TR34055|c0_g3_i1	20
TR34070|c0_g1_i1	102
TR34072|c0_g1_i5	70
TR34123|c0_g1_i1	32
TR34126|c0_g2_i1	46
TR34126|c2_g5_i1	22
TR3416|c0_g2_i1	24
TR34179|c0_g1_i1	14
TR34179|c0_g1_i4	22
TR34194|c0_g2_i9	22
TR34266|c1_g1_i1	122
TR34271|c2_g5_i1	34
TR34277|c0_g1_i2	50
TR34296|c0_g1_i2	48
TR34318|c1_g3_i1	12
TR34373|c0_g1_i2	212
TR34373|c0_g1_i4	162
TR34377|c0_g1_i6	62
TR34382|c0_g3_i4	52
TR34390|c0_g1_i2	126
TR34414|c0_g2_i6	102
TR34417|c0_g2_i1	86
TR34459|c0_g3_i1	26
TR34468|c0_g8_i1	42
TR34482|c0_g1_i2	58
TR34496|c0_g1_i7	22
TR34508|c0_g1_i8	90
TR34542|c0_g4_i1	54
TR34565|c2_g5_i1	22
TR34576|c0_g3_i2	14
TR34625|c0_g1_i3	78
TR34627|c0_g2_i1	16
TR3463|c0_g2_i2	34
TR34640|c0_g1_i3	14
TR34640|c1_g1_i5	26
TR34643|c0_g1_i3	42
TR34666|c0_g1_i3	170
TR34721|c0_g1_i2	78
TR34742|c0_g1_i1	68
TR34759|c2_g2_i4	38
TR34760|c2_g1_i3	38
TR34768|c0_g1_i1	36
TR34770|c1_g1_i2	22
TR34776|c0_g1_i3	56
TR34776|c0_g2_i2	50
TR3480|c1_g1_i6	66
TR34810|c0_g3_i1	20
TR34846|c0_g1_i2	10
TR3485|c0_g3_i1	24
TR34894|c0_g5_i1	16
TR3491|c0_g2_i1	16
TR34919|c0_g1_i5	20
TR34920|c0_g1_i8	34
TR34988|c0_g1_i6	16
TR35006|c2_g1_i3	36
TR35017|c0_g1_i2	58
TR35040|c0_g2_i4	88
TR35051|c1_g1_i1	10
TR35051|c1_g5_i1	32
TR3506|c3_g1_i2	30
TR35066|c0_g2_i1	10
TR35080|c0_g1_i4	76
TR35086|c0_g1_i4	22
TR35091|c0_g1_i2	40
TR35133|c0_g1_i1	202
TR3514|c2_g11_i1	38
TR3515|c0_g1_i4	42
TR35169|c0_g1_i4	46
TR35233|c2_g2_i11	56
TR35233|c2_g2_i9	74
TR35237|c0_g1_i1	20
TR35242|c0_g1_i2	34
TR35242|c0_g2_i1	26
TR35263|c0_g2_i2	36
TR35266|c1_g1_i3	60
TR35266|c1_g3_i5	40
TR35267|c0_g1_i4	86
TR35279|c0_g4_i1	18
TR35289|c0_g1_i2	16
TR3529|c2_g1_i8	60
TR35305|c0_g1_i1	36
TR35340|c1_g1_i4	32
TR35350|c0_g2_i1	28
TR35357|c0_g1_i2	68
TR35371|c2_g1_i5	1536
TR35385|c0_g4_i1	100
TR35389|c0_g1_i3	76
TR35392|c0_g1_i4	96
TR35447|c0_g1_i4	54
TR35462|c0_g1_i1	182
TR35462|c0_g1_i3	74
TR3548|c1_g3_i1	24
TR35492|c1_g1_i1	40
TR35507|c0_g1_i1	54
TR35509|c0_g1_i4	18
TR3551|c0_g1_i3	68
TR35567|c0_g3_i2	94
TR3557|c0_g1_i3	18
TR3559|c0_g1_i2	40
TR35603|c1_g1_i1	16
TR35607|c0_g1_i1	88
TR35607|c0_g1_i8	104
TR35614|c1_g1_i3	30
TR35674|c0_g2_i7	68
TR35674|c0_g3_i1	18
TR35710|c0_g1_i5	32
TR35738|c0_g2_i4	52
TR35742|c0_g1_i5	12
TR35752|c0_g2_i1	24
TR35766|c2_g5_i2	28
TR35825|c0_g1_i1	100
TR35849|c4_g6_i1	26
TR35853|c2_g2_i1	46
TR35894|c0_g1_i3	16
TR35932|c1_g2_i1	30
TR35932|c1_g3_i1	54
TR35964|c0_g1_i3	72
TR35972|c0_g3_i5	58
TR35975|c0_g2_i1	18
TR35976|c0_g2_i3	52
TR35980|c2_g2_i1	88
TR35982|c0_g6_i1	52
TR35983|c0_g1_i2	120
TR35984|c0_g1_i4	28
TR36003|c0_g1_i1	28
TR36028|c1_g2_i1	32
TR36033|c1_g1_i1	22
TR36051|c0_g2_i1	32
TR36180|c0_g2_i1	16
TR36219|c0_g1_i1	16
TR36229|c0_g1_i1	120
TR36238|c1_g6_i3	16
TR36240|c0_g4_i2	26
TR36260|c0_g1_i2	56
TR36268|c1_g2_i1	10
TR36273|c0_g3_i1	62
TR36288|c0_g1_i1	38
TR36289|c0_g3_i16	58
TR36303|c0_g1_i1	18
TR36326|c1_g5_i8	12
TR36339|c1_g1_i2	440
TR36342|c0_g1_i6	60
TR36352|c0_g2_i3	50
TR36374|c0_g7_i2	18
TR36396|c0_g5_i2	24
TR36396|c0_g5_i3	34
TR36401|c0_g1_i1	14
TR36403|c0_g2_i1	72
TR36411|c0_g1_i10	28
TR36420|c0_g1_i7	36
TR36440|c0_g5_i1	20
TR36480|c1_g1_i5	80
TR36539|c0_g1_i1	72
TR36603|c3_g2_i5	132
TR36619|c0_g1_i4	232
TR36635|c0_g2_i1	16
TR36650|c0_g3_i6	30
TR3667|c3_g1_i3	88
TR3667|c3_g1_i4	52
TR36735|c0_g1_i1	194
TR36751|c0_g1_i2	106
TR36762|c1_g3_i1	18
TR36825|c1_g1_i7	28
TR36826|c1_g4_i1	22
TR36832|c0_g5_i1	50
TR36836|c1_g2_i4	36
TR36838|c1_g1_i9	554
TR36910|c1_g1_i4	32
TR36915|c1_g1_i2	22
TR36934|c0_g3_i10	38
TR36958|c0_g2_i4	72
TR36960|c0_g1_i4	64
TR36989|c0_g2_i3	62
TR36989|c0_g2_i4	98
TR36991|c1_g1_i2	144
TR36995|c0_g3_i1	1174
TR37008|c0_g6_i1	12
TR37020|c1_g1_i1	20
TR37027|c0_g4_i2	18
TR3706|c1_g8_i1	28
TR37061|c0_g3_i1	26
TR37067|c0_g3_i1	16
TR37086|c1_g2_i5	56
TR37092|c4_g4_i2	110
TR3712|c0_g1_i1	24
TR37126|c0_g1_i1	44
TR37171|c3_g3_i3	28
TR37199|c0_g1_i3	92
TR37212|c0_g5_i5	30
TR37219|c2_g2_i4	18
TR37228|c0_g2_i1	44
TR37257|c1_g4_i2	28
TR37263|c3_g4_i1	20
TR3727|c0_g1_i5	26
TR37272|c1_g1_i7	78
TR37280|c0_g3_i6	16
TR37283|c0_g2_i2	18
TR37302|c0_g3_i1	26
TR37351|c0_g1_i2	90
TR37366|c0_g2_i2	14
TR37370|c0_g1_i3	26
TR37382|c0_g6_i2	24
TR37384|c0_g2_i4	36
TR37384|c0_g3_i1	38
TR3740|c0_g1_i1	14
TR37400|c0_g1_i1	36
TR3744|c0_g1_i1	32
TR37444|c3_g3_i1	18
TR37457|c0_g1_i11	74
TR37466|c0_g2_i1	94
TR37471|c2_g10_i3	44
TR37474|c1_g6_i2	98
TR37475|c0_g4_i1	44
TR37478|c0_g1_i1	22
TR37491|c0_g3_i5	42
TR37541|c1_g4_i1	28
TR37548|c0_g1_i2	48
TR37551|c1_g1_i4	26
TR37573|c1_g6_i6	46
TR37576|c0_g1_i1	26
TR37587|c0_g1_i3	24
TR37588|c1_g2_i1	16
TR37625|c0_g3_i1	40
TR37635|c0_g3_i9	68
TR3765|c0_g3_i1	24
TR37662|c0_g3_i1	16
TR3767|c0_g1_i1	36
TR37736|c0_g8_i1	18
TR37789|c0_g3_i1	30
TR37789|c0_g5_i2	16
TR3779|c0_g2_i2	14
TR3779|c0_g3_i1	78
TR37795|c0_g2_i6	118
TR37819|c2_g2_i2	54
TR37822|c0_g1_i1	14
TR37822|c0_g4_i3	24
TR37826|c0_g1_i2	68
TR37831|c2_g1_i1	30
TR37845|c0_g1_i2	42
TR37850|c0_g4_i3	22
TR37852|c1_g1_i3	58
TR37908|c0_g1_i4	58
TR37914|c0_g14_i1	28
TR37938|c1_g3_i2	42
TR37954|c1_g3_i6	24
TR37982|c1_g8_i1	36
TR37986|c1_g1_i1	14
TR37989|c1_g1_i1	12
TR38002|c0_g1_i2	86
TR38010|c0_g1_i7	20
TR38011|c2_g3_i5	18
TR38046|c0_g1_i5	70
TR3805|c1_g1_i6	32
TR38081|c1_g1_i3	184
TR38097|c0_g4_i3	12
TR38097|c0_g5_i3	18
TR38108|c0_g8_i3	36
TR38131|c0_g2_i1	14
TR38136|c1_g3_i5	44
TR38139|c0_g2_i1	22
TR38148|c0_g6_i1	142
TR38152|c0_g1_i3	26
TR38175|c1_g2_i1	14
TR38182|c0_g4_i1	26
TR38182|c0_g6_i1	34
TR38188|c0_g1_i6	114
TR38217|c1_g3_i3	14
TR38231|c0_g1_i5	102
TR38274|c0_g3_i5	72
TR38299|c0_g2_i1	36
TR38318|c1_g1_i2	46
TR38334|c0_g5_i2	48
TR38341|c0_g3_i2	38
TR38350|c0_g2_i4	52
TR38398|c0_g4_i2	20
TR38419|c0_g1_i2	52
TR3844|c1_g1_i9	24
TR38460|c0_g1_i2	90
TR38468|c0_g1_i1	18
TR38470|c0_g5_i3	20
TR38487|c0_g2_i4	24
TR3849|c0_g1_i5	22
TR38498|c0_g2_i1	94
TR3850|c0_g1_i1	372
TR38514|c1_g1_i2	100
TR38598|c0_g1_i1	18
TR3861|c0_g1_i4	22
TR38613|c0_g2_i6	32
TR38625|c0_g1_i1	22
TR38638|c0_g1_i1	10
TR38658|c0_g1_i1	88
TR38662|c1_g2_i1	22
TR38681|c0_g2_i1	24
TR38728|c0_g1_i1	16
TR38740|c0_g2_i5	32
TR38752|c0_g2_i11	74
TR38754|c1_g1_i3	16
TR38766|c0_g6_i2	38
TR38773|c0_g1_i1	16
TR38773|c0_g1_i2	18
TR38795|c0_g1_i5	14
TR38800|c1_g1_i1	34
TR38810|c1_g1_i1	138
TR38810|c1_g1_i4	34
TR38841|c0_g2_i5	52
TR38841|c0_g2_i9	14
TR38888|c0_g2_i2	38
TR38911|c2_g1_i3	18
TR38914|c0_g8_i3	36
TR38952|c0_g1_i1	140
TR38967|c0_g1_i1	14
TR38967|c0_g2_i4	22
TR38968|c0_g4_i1	20
TR38975|c0_g2_i5	42
TR39003|c0_g3_i9	32
TR39028|c0_g2_i1	22
TR39037|c0_g2_i1	68
TR39041|c0_g5_i1	28
TR39043|c0_g1_i1	142
TR39082|c2_g1_i1	68
TR39095|c0_g1_i1	44
TR39115|c1_g1_i1	26
TR39121|c1_g1_i1	24
TR39129|c1_g1_i5	20
TR39141|c1_g4_i1	20
TR39158|c2_g6_i1	14
TR39160|c0_g1_i4	86
TR39176|c0_g1_i1	34
TR39188|c0_g3_i5	40
TR39189|c0_g1_i1	14
TR3921|c1_g6_i1	28
TR39212|c0_g1_i2	34
TR39244|c0_g2_i4	32
TR39252|c0_g2_i1	12
TR39256|c0_g4_i1	32
TR39262|c1_g2_i4	38
TR39262|c1_g2_i9	48
TR3928|c1_g1_i14	12
TR39289|c0_g1_i3	30
TR39298|c0_g3_i1	90
TR39302|c0_g4_i5	84
TR39334|c1_g3_i5	28
TR39338|c0_g3_i2	34
TR39341|c0_g1_i1	14
TR39343|c0_g4_i2	30
TR39376|c0_g5_i11	26
TR39382|c0_g1_i10	92
TR39389|c0_g2_i6	30
TR39396|c2_g8_i5	24
TR39414|c1_g5_i1	28
TR39472|c2_g3_i1	20
TR39473|c0_g3_i1	24
TR3954|c1_g6_i1	44
TR39550|c0_g1_i2	44
TR39567|c0_g1_i2	70
TR39586|c1_g1_i5	14
TR39592|c0_g1_i2	36
TR39609|c0_g1_i2	102
TR39614|c0_g4_i1	18
TR39616|c0_g1_i1	48
TR39679|c0_g1_i1	84
TR39685|c0_g2_i4	24
TR39685|c0_g2_i5	16
TR39695|c0_g1_i3	12
TR39718|c1_g1_i13	26
TR39757|c0_g3_i2	52
TR39770|c0_g2_i9	98
TR39803|c0_g2_i3	22
TR39825|c0_g4_i2	40
TR39841|c0_g2_i2	44
TR39846|c0_g1_i1	44
TR39846|c0_g3_i1	16
TR39852|c0_g3_i6	32
TR39855|c1_g2_i2	16
TR39857|c0_g1_i2	18
TR39857|c0_g1_i5	18
TR39866|c0_g2_i10	54
TR39867|c1_g3_i1	20
TR39869|c3_g2_i2	114
TR39870|c1_g1_i11	28
TR39872|c0_g3_i1	14
TR39874|c1_g1_i2	78
TR39880|c0_g1_i3	32
TR39897|c2_g1_i1	108
TR39950|c0_g2_i3	28
TR39964|c0_g4_i5	222
TR39967|c0_g9_i1	30
TR39974|c0_g3_i1	30
TR39974|c0_g3_i6	30
TR39990|c0_g2_i2	32
TR39997|c3_g1_i1	48
TR39997|c3_g4_i9	64
TR40016|c0_g3_i1	28
TR40021|c1_g1_i1	30
TR40037|c0_g2_i4	28
TR40040|c0_g3_i1	22
TR4005|c0_g1_i1	38
TR40050|c0_g1_i8	36
TR4010|c0_g1_i2	26
TR40117|c0_g2_i6	102
TR40134|c0_g4_i6	12
TR40154|c1_g5_i1	16
TR40172|c0_g2_i3	26
TR40202|c0_g2_i1	30
TR40202|c0_g2_i4	146
TR40202|c0_g3_i3	28
TR40204|c0_g6_i4	18
TR40206|c0_g1_i1	20
TR40220|c0_g1_i4	26
TR40228|c0_g1_i1	20
TR40264|c0_g1_i2	24
TR40299|c0_g2_i1	26
TR4030|c0_g2_i3	20
TR40308|c0_g1_i1	14
TR40313|c0_g1_i1	12
TR40322|c0_g4_i3	26
TR40357|c0_g5_i1	34
TR40369|c0_g1_i2	28
TR40385|c0_g2_i17	46
TR40386|c0_g2_i3	20
TR40421|c1_g1_i2	30
TR40426|c0_g5_i1	16
TR40458|c1_g3_i1	16
TR40459|c0_g1_i2	36
TR40475|c3_g4_i2	14
TR40486|c0_g3_i5	12
TR40489|c1_g1_i10	28
TR40492|c1_g1_i1	120
TR40495|c0_g8_i1	26
TR40534|c0_g1_i9	18
TR40536|c0_g2_i5	12
TR40542|c0_g1_i1	18
TR40543|c1_g3_i6	28
TR40553|c0_g2_i3	34
TR40554|c0_g5_i1	26
TR40580|c1_g2_i2	20
TR40594|c1_g6_i1	18
TR40618|c0_g2_i1	36
TR40618|c0_g3_i2	32
TR40620|c0_g1_i1	170
TR40631|c1_g2_i5	52
TR40631|c1_g2_i9	56
TR40632|c0_g3_i2	30
TR40646|c0_g1_i1	14
TR40649|c2_g1_i1	52
TR40663|c0_g3_i1	24
TR40673|c1_g3_i3	48
TR40682|c0_g6_i5	90
TR40691|c0_g2_i1	20
TR40691|c0_g3_i4	30
TR40696|c0_g1_i3	18
TR40699|c1_g1_i1	14
TR40708|c1_g2_i6	42
TR40708|c1_g4_i1	48
TR40717|c0_g4_i3	22
TR40728|c0_g1_i7	58
TR40736|c0_g3_i2	30
TR40745|c0_g1_i1	84
TR40749|c0_g1_i1	10
TR40769|c0_g2_i3	30
TR40777|c4_g6_i2	28
TR40791|c0_g2_i1	22
TR40799|c0_g2_i1	58
TR40813|c0_g3_i1	24
TR40829|c0_g2_i4	32
TR40845|c0_g2_i1	12
TR40851|c1_g1_i2	18
TR40882|c0_g1_i1	66
TR40894|c1_g7_i1	42
TR40899|c0_g1_i1	20
TR4090|c0_g1_i1	62
TR40930|c0_g1_i6	28
TR40932|c1_g5_i1	14
TR40976|c1_g3_i4	26
TR40999|c0_g1_i1	20
TR41032|c0_g1_i7	62
TR41088|c0_g8_i3	30
TR41094|c1_g5_i22	40
TR41097|c2_g5_i3	20
TR41127|c1_g4_i2	56
TR41132|c2_g1_i4	26
TR41139|c1_g4_i6	32
TR41142|c0_g1_i1	42
TR41144|c0_g5_i2	32
TR41171|c0_g3_i5	32
TR41202|c0_g4_i1	20
TR41213|c0_g1_i2	20
TR41224|c0_g3_i1	26
TR41237|c1_g1_i21	124
TR41266|c3_g5_i6	38
TR41272|c1_g1_i5	20
TR41273|c1_g3_i3	66
TR41292|c0_g1_i1	32
TR41309|c0_g1_i1	40
TR41313|c0_g2_i6	60
TR41341|c0_g4_i1	12
TR41403|c2_g1_i4	46
TR41405|c0_g4_i1	12
TR41405|c0_g5_i1	14
TR41407|c0_g2_i2	28
TR41446|c0_g4_i4	46
TR41459|c0_g1_i1	34
TR41463|c2_g2_i1	16
TR41473|c0_g1_i4	58
TR41485|c0_g1_i1	28
TR41489|c0_g4_i1	12
TR41562|c1_g6_i4	28
TR41573|c1_g6_i1	32
TR41612|c0_g1_i1	24
TR41624|c0_g1_i1	12
TR41624|c0_g3_i1	34
TR41626|c0_g2_i3	50
TR41649|c0_g1_i1	54
TR41652|c1_g1_i5	24
TR41661|c0_g5_i1	22
TR41671|c1_g1_i1	40
TR41688|c0_g4_i1	20
TR41700|c1_g3_i1	80
TR41743|c0_g3_i1	22
TR41750|c0_g1_i7	18
TR41762|c0_g11_i1	28
TR41762|c0_g2_i1	22
TR41776|c1_g1_i5	132
TR41790|c0_g4_i1	72
TR41799|c0_g3_i1	14
TR41803|c0_g5_i2	30
TR41804|c0_g1_i1	18
TR41808|c0_g1_i2	78
TR41813|c0_g4_i2	66
TR41818|c2_g6_i6	12
TR41866|c1_g1_i4	84
TR41868|c1_g3_i1	16
TR41877|c0_g2_i1	18
TR41885|c0_g4_i3	40
TR41903|c1_g6_i1	14
TR41904|c1_g1_i1	26
TR41938|c0_g3_i2	20
TR41944|c0_g1_i9	34
TR41944|c0_g3_i3	30
TR41956|c0_g3_i6	38
TR41964|c0_g8_i6	50
TR41995|c1_g1_i1	16
TR42015|c0_g5_i1	20
TR42035|c0_g3_i3	26
TR42042|c0_g6_i1	18
TR42067|c1_g1_i1	22
TR42077|c0_g1_i5	90
TR42085|c0_g4_i1	26
TR42090|c0_g3_i5	18
TR42104|c0_g5_i1	16
TR42111|c0_g1_i5	10
TR42112|c0_g1_i1	38
TR42133|c0_g1_i2	90
TR42137|c0_g3_i7	40
TR42138|c0_g1_i3	12
TR42184|c1_g6_i4	40
TR42191|c0_g1_i1	22
TR42206|c0_g3_i3	26
TR42217|c0_g3_i1	16
TR42241|c0_g1_i3	60
TR42254|c0_g1_i2	44
TR42264|c0_g1_i6	28
TR42291|c0_g2_i2	26
TR42294|c0_g3_i1	16
TR42296|c1_g3_i1	32
TR42300|c0_g2_i3	26
TR42300|c0_g3_i4	48
TR42305|c1_g2_i6	16
TR42316|c0_g2_i1	16
TR42322|c0_g7_i1	12
TR42335|c1_g1_i4	34
TR42338|c0_g2_i7	62
TR42341|c0_g1_i2	76
TR42346|c1_g2_i1	96
TR42346|c1_g2_i2	26
TR42350|c1_g2_i2	32
TR42354|c0_g1_i3	22
TR42378|c0_g1_i1	56
TR42380|c0_g1_i2	86
TR42381|c1_g1_i3	22
TR42405|c2_g2_i4	54
TR42429|c0_g2_i1	86
TR42435|c1_g2_i20	14
TR42506|c1_g1_i5	22
TR42507|c0_g4_i3	26
TR42510|c0_g4_i2	22
TR42536|c0_g5_i1	24
TR42536|c0_g9_i1	12
TR42542|c0_g1_i1	18
TR42556|c1_g4_i1	26
TR42558|c1_g1_i10	44
TR42580|c0_g2_i1	50
TR42580|c0_g3_i3	26
TR42587|c2_g1_i1	28
TR42587|c2_g1_i3	16
TR42587|c2_g3_i2	14
TR42600|c0_g8_i4	52
TR42601|c0_g2_i5	16
TR42620|c0_g1_i3	68
TR42623|c1_g1_i1	22
TR42632|c0_g3_i5	56
TR42675|c1_g7_i2	14
TR42686|c0_g2_i3	78
TR42692|c0_g1_i2	42
TR42699|c0_g1_i1	30
TR42705|c0_g4_i1	28
TR42708|c0_g1_i5	22
TR42713|c0_g1_i3	26
TR42713|c1_g6_i1	42
TR42714|c1_g4_i1	16
TR42726|c1_g2_i2	32
TR42726|c1_g5_i1	46
TR42726|c1_g5_i2	22
TR42738|c1_g10_i1	36
TR42742|c1_g5_i1	14
TR42744|c0_g2_i2	24
TR42776|c0_g6_i4	34
TR42794|c0_g3_i4	24
TR42826|c1_g5_i2	18
TR42861|c0_g3_i1	20
TR42876|c0_g3_i2	366
TR42904|c0_g5_i1	30
TR42907|c0_g1_i2	62
TR42910|c0_g1_i1	44
TR42920|c0_g5_i1	22
TR42950|c0_g5_i8	18
TR42969|c0_g4_i1	48
TR42993|c0_g5_i4	46
TR43005|c2_g8_i2	20
TR43006|c1_g2_i2	64
TR43007|c0_g2_i5	80
TR43007|c0_g2_i8	72
TR43013|c0_g3_i1	14
TR43037|c0_g2_i1	20
TR43054|c0_g1_i2	76
TR43061|c0_g1_i2	20
TR43061|c0_g1_i5	24
TR43076|c0_g5_i1	20
TR43077|c0_g4_i1	18
TR43088|c1_g1_i1	86
TR43092|c0_g1_i3	144
TR43159|c0_g1_i4	62
TR43159|c0_g1_i6	30
TR43168|c1_g6_i5	30
TR43176|c0_g3_i1	18
TR43200|c0_g1_i3	82
TR43210|c0_g6_i1	16
TR43210|c0_g8_i4	16
TR43217|c0_g1_i1	148
TR43217|c0_g1_i2	80
TR43224|c1_g2_i1	20
TR43242|c0_g3_i1	14
TR43243|c1_g1_i1	24
TR43249|c0_g1_i1	16
TR43252|c0_g2_i9	26
TR43254|c0_g1_i5	18
TR43287|c0_g1_i1	30
TR43313|c0_g1_i3	26
TR43320|c0_g5_i1	12
TR43326|c0_g7_i1	18
TR43327|c0_g2_i2	36
TR43330|c1_g2_i7	18
TR43351|c0_g1_i2	68
TR43370|c0_g1_i1	22
TR43419|c1_g3_i1	20
TR43427|c0_g6_i1	18
TR43429|c0_g1_i2	16
TR43434|c1_g1_i5	22
TR43465|c1_g1_i1	18
TR43589|c0_g1_i2	30
TR43591|c0_g5_i1	16
TR43595|c1_g7_i1	46
TR43600|c0_g9_i1	18
TR43650|c0_g4_i4	30
TR43656|c1_g1_i1	12
TR43677|c0_g10_i1	16
TR43677|c0_g11_i1	12
TR43680|c2_g1_i5	28
TR43680|c2_g1_i7	44
TR43701|c1_g1_i1	14
TR43704|c3_g4_i1	30
TR43728|c0_g4_i1	20
TR43745|c1_g3_i2	12
TR43747|c0_g1_i3	66
TR43750|c1_g2_i3	62
TR43787|c0_g2_i2	66
TR43787|c0_g2_i3	32
TR43788|c1_g1_i5	40
TR43798|c0_g5_i2	40
TR43816|c0_g5_i2	106
TR43817|c2_g3_i1	14
TR43825|c0_g2_i2	36
TR43832|c1_g2_i1	24
TR43841|c0_g1_i3	18
TR43851|c1_g4_i3	28
TR43869|c0_g1_i1	30
TR43881|c2_g2_i2	30
TR43894|c2_g2_i2	36
TR43907|c0_g1_i1	38
TR43908|c1_g1_i3	12
TR43961|c1_g3_i1	24
TR43961|c1_g4_i3	56
TR43961|c1_g5_i1	146
TR43963|c0_g2_i1	46
TR43964|c0_g2_i1	22
TR43973|c2_g4_i1	24
TR43988|c0_g4_i1	12
TR44033|c0_g2_i3	84
TR44033|c0_g6_i6	32
TR44043|c2_g9_i7	60
TR44046|c0_g1_i3	82
TR44053|c1_g4_i1	26
TR44058|c2_g2_i2	38
TR44062|c1_g2_i1	14
TR44065|c1_g4_i2	32
TR44074|c0_g4_i2	14
TR44076|c0_g2_i1	30
TR44108|c1_g1_i2	30
TR44110|c0_g1_i2	52
TR44114|c0_g1_i6	38
TR44123|c1_g1_i2	42
TR44131|c4_g1_i1	22
TR44139|c2_g2_i1	44
TR44139|c2_g6_i1	18
TR44156|c1_g6_i7	14
TR44160|c2_g3_i3	18
TR44163|c0_g3_i1	48
TR44189|c1_g2_i4	36
TR44199|c3_g4_i2	62
TR44204|c1_g3_i1	16
TR44206|c0_g2_i1	48
TR44227|c0_g1_i3	22
TR44248|c4_g3_i1	14
TR44255|c0_g5_i1	22
TR44259|c2_g3_i2	54
TR44263|c1_g3_i1	28
TR44267|c0_g7_i1	68
TR44274|c2_g1_i5	54
TR44274|c2_g5_i1	20
TR44289|c0_g1_i3	24
TR44298|c1_g6_i1	14
TR44300|c2_g2_i1	28
TR44301|c1_g3_i1	28
TR44309|c1_g2_i3	36
TR44309|c1_g3_i3	36
TR44317|c0_g1_i1	40
TR44355|c2_g1_i4	34
TR44360|c0_g2_i3	48
TR44364|c1_g1_i1	16
TR44370|c0_g1_i1	18
TR44379|c0_g4_i4	24
TR44381|c3_g1_i1	14
TR44382|c0_g2_i2	18
TR44402|c0_g2_i6	36
TR44415|c0_g1_i5	36
TR44420|c2_g9_i2	12
TR44434|c2_g4_i1	22
TR44447|c2_g2_i1	52
TR44555|c2_g12_i1	10
TR44556|c2_g1_i2	70
TR44562|c2_g1_i5	30
TR44571|c5_g4_i1	56
TR44595|c0_g1_i1	24
TR44604|c3_g3_i3	16
TR44609|c8_g4_i1	36
TR44609|c8_g5_i6	20
TR44618|c0_g2_i2	28
TR44628|c1_g1_i1	108
TR44631|c0_g2_i3	70
TR44641|c2_g9_i1	36
TR44670|c1_g3_i1	28
TR44720|c0_g4_i3	24
TR44736|c0_g2_i1	24
TR44745|c2_g1_i1	20
TR44750|c1_g2_i2	16
TR44761|c0_g1_i2	20
TR44779|c2_g3_i1	16
TR44786|c2_g3_i3	34
TR44791|c1_g3_i3	32
TR44799|c1_g1_i2	16
TR44808|c4_g7_i1	10
TR44811|c3_g3_i2	24
TR44824|c2_g2_i2	12
TR44841|c1_g2_i1	66
TR44855|c1_g5_i2	18
TR44855|c2_g6_i1	16
TR44855|c3_g6_i1	28
TR44876|c0_g3_i3	58
TR44878|c3_g2_i4	22
TR44878|c4_g2_i1	16
TR7005|c0_g1_i1	28
TR7281|c0_g1_i3	56
TR7338|c0_g1_i3	34
TR7470|c0_g1_i1	722
TR7501|c0_g1_i1	14
TR7503|c1_g3_i1	42
TR7514|c0_g1_i2	46
TR7629|c0_g2_i1	18
TR7663|c0_g5_i2	44
TR7676|c1_g2_i1	58
TR7731|c5_g2_i1	22
TR7737|c0_g1_i2	40
TR7776|c0_g2_i1	12
TR7804|c0_g1_i2	22
TR7817|c0_g5_i1	44
TR7817|c0_g5_i2	24
TR7824|c0_g1_i3	220
TR7829|c0_g3_i1	32
TR7837|c0_g2_i1	36
TR7857|c0_g4_i1	22
TR7877|c0_g1_i5	76
TR7879|c0_g5_i1	16
TR7928|c0_g6_i1	30
TR7936|c0_g1_i3	108
TR7946|c0_g1_i5	30
TR8039|c0_g2_i2	32
TR8068|c1_g4_i4	58
TR8132|c0_g7_i1	14
TR8132|c0_g7_i2	18
TR8149|c0_g3_i4	40
TR8158|c0_g3_i5	34
TR8158|c0_g4_i1	24
TR8173|c0_g2_i2	20
TR8174|c3_g1_i1	78
TR8187|c0_g12_i1	14
TR8189|c0_g5_i3	22
TR8217|c0_g7_i1	22
TR8217|c0_g7_i2	12
TR8219|c0_g1_i2	34
TR8219|c0_g5_i1	24
TR8228|c0_g2_i3	14
TR8229|c5_g3_i1	28
TR8238|c0_g10_i1	38
TR8262|c1_g3_i1	22
TR8270|c1_g1_i1	22
TR8297|c2_g2_i2	48
TR8310|c0_g5_i2	14
TR9065|c0_g1_i1	30
TR9432|c0_g1_i1	18
TR9580|c0_g1_i1	30
TR9940|c0_g1_i1	24
TR10035|c1_g1_i1	16
TR1013|c0_g1_i1	14
TR10135|c0_g1_i1	24
TR10157|c0_g2_i1	20
TR10295|c0_g1_i2	26
TR10436|c0_g1_i1	16
TR10488|c0_g1_i1	12
TR10529|c0_g1_i1	30
TR1058|c0_g1_i1	18
TR10654|c0_g1_i1	52
TR10822|c0_g1_i1	20
TR1092|c0_g1_i2	16
TR10929|c0_g1_i1	12
TR10990|c0_g1_i1	22
TR11108|c0_g1_i1	12
TR1122|c0_g1_i1	20
TR11257|c0_g2_i2	28
TR11266|c0_g1_i1	40
TR1127|c0_g2_i1	20
TR11312|c0_g1_i1	24
TR11360|c0_g2_i1	16
TR11476|c0_g1_i1	16
TR11500|c0_g1_i1	16
TR11599|c1_g1_i1	24
TR11623|c0_g1_i1	14
TR11641|c0_g1_i1	18
TR11807|c0_g2_i1	20
TR11862|c1_g1_i1	36
TR11935|c0_g1_i1	36
TR11950|c0_g1_i2	36
TR12034|c0_g1_i1	16
TR12085|c0_g1_i1	16
TR12112|c0_g1_i1	14
TR12192|c0_g1_i1	14
TR12258|c0_g1_i1	182
TR12273|c0_g1_i1	26
TR1233|c0_g1_i1	16
TR12331|c0_g2_i1	24
TR12379|c0_g2_i1	10
TR12395|c0_g1_i1	70
TR12415|c0_g1_i1	20
TR12466|c0_g1_i2	28
TR12635|c0_g1_i1	14
TR1274|c0_g1_i1	10
TR12750|c0_g1_i3	24
TR12756|c0_g1_i1	10
TR12878|c0_g1_i1	12
TR12982|c0_g2_i1	26
TR13052|c0_g1_i1	26
TR13129|c0_g1_i4	14
TR1317|c0_g1_i2	14
TR13193|c0_g1_i1	16
TR13286|c0_g1_i2	20
TR13307|c0_g1_i1	18
TR1331|c0_g2_i1	18
TR13383|c0_g2_i1	30
TR13399|c0_g1_i1	34
TR13415|c0_g1_i1	64
TR1354|c1_g1_i1	30
TR13562|c0_g1_i1	18
TR13589|c0_g1_i1	24
TR13715|c0_g1_i1	14
TR13792|c0_g1_i2	16
TR13814|c0_g1_i1	54
TR1397|c0_g1_i2	46
TR13978|c0_g1_i1	24
TR14000|c0_g1_i1	26
TR1401|c0_g1_i1	24
TR14014|c0_g1_i1	24
TR14045|c0_g1_i1	20
TR14046|c0_g1_i1	24
TR14086|c0_g3_i1	30
TR1409|c1_g1_i1	26
TR14107|c0_g1_i2	22
TR14139|c0_g1_i1	18
TR14171|c0_g1_i1	28
TR14190|c1_g1_i1	16
TR14253|c0_g1_i1	20
TR14277|c0_g1_i1	12
TR14294|c0_g1_i1	42
TR14294|c0_g2_i1	28
TR14388|c0_g2_i1	12
TR14391|c0_g2_i1	20
TR14451|c0_g1_i1	18
TR14454|c0_g1_i1	18
TR14484|c0_g1_i1	18
TR14518|c0_g1_i1	40
TR14518|c0_g1_i2	36
TR14539|c0_g1_i1	54
TR14539|c0_g2_i1	42
TR14668|c0_g1_i1	16
TR14791|c0_g1_i1	92
TR14791|c0_g2_i1	68
TR14812|c1_g1_i1	12
TR14840|c0_g1_i1	18
TR14907|c0_g2_i1	30
TR14959|c0_g1_i1	16
TR15010|c0_g1_i1	16
TR15041|c0_g1_i1	12
TR15081|c0_g2_i1	14
TR15087|c0_g1_i1	22
TR1517|c0_g1_i1	14
TR15304|c0_g1_i1	12
TR15380|c0_g1_i2	14
TR15395|c0_g2_i1	20
TR15403|c0_g2_i1	20
TR15419|c0_g2_i1	58
TR15429|c0_g1_i1	20
TR15446|c0_g2_i1	14
TR15494|c0_g1_i1	16
TR15494|c0_g1_i2	20
TR15593|c0_g2_i1	20
TR15599|c0_g1_i1	10
TR15731|c0_g1_i1	40
TR15819|c0_g1_i1	48
TR15857|c0_g1_i1	30
TR15953|c0_g1_i1	34
TR16054|c1_g1_i1	44
TR16113|c0_g1_i1	18
TR16128|c0_g1_i1	16
TR16128|c0_g2_i1	14
TR16173|c0_g1_i1	18
TR16174|c0_g1_i1	12
TR16201|c0_g1_i2	24
TR16213|c0_g2_i1	14
TR16219|c1_g1_i1	34
TR16229|c0_g1_i1	36
TR16283|c0_g1_i1	18
TR16301|c0_g1_i1	20
TR16396|c0_g1_i1	30
TR16410|c0_g1_i2	12
TR16427|c0_g1_i1	12
TR16445|c0_g1_i1	18
TR16501|c0_g1_i1	14
TR1653|c0_g2_i3	10
TR16537|c0_g1_i1	28
TR16559|c0_g1_i2	12
TR16575|c0_g1_i1	12
TR1661|c0_g3_i1	18
TR16666|c0_g2_i1	34
TR16666|c0_g2_i2	28
TR16680|c1_g1_i1	14
TR16723|c0_g1_i1	50
TR16726|c0_g1_i1	26
TR16741|c0_g1_i1	40
TR1685|c0_g1_i1	20
TR16925|c0_g1_i1	106
TR16925|c0_g1_i2	94
TR16944|c0_g1_i1	26
TR16974|c0_g2_i1	18
TR17015|c0_g1_i1	14
TR17023|c0_g1_i1	40
TR17062|c0_g1_i1	20
TR1710|c1_g1_i1	22
TR17115|c0_g2_i1	16
TR17163|c0_g1_i3	22
TR1719|c0_g1_i2	12
TR17234|c0_g1_i1	16
TR17241|c0_g1_i1	26
TR1728|c0_g2_i1	16
TR17321|c0_g1_i1	14
TR17334|c0_g1_i1	12
TR17398|c0_g1_i2	66
TR17427|c0_g2_i1	16
TR17457|c0_g1_i1	22
TR17470|c0_g1_i1	32
TR17485|c0_g1_i1	12
TR17521|c0_g1_i1	22
TR1754|c0_g1_i2	38
TR1754|c0_g1_i3	34
TR17595|c0_g1_i2	14
TR17636|c0_g1_i3	20
TR17661|c0_g1_i1	14
TR17733|c0_g2_i1	36
TR17751|c0_g1_i1	12
TR17753|c0_g1_i1	18
TR17770|c0_g1_i1	24
TR17773|c1_g1_i2	36
TR17796|c0_g1_i1	60
TR17804|c0_g1_i1	12
TR17819|c0_g1_i1	14
TR17833|c0_g2_i1	78
TR1784|c0_g1_i1	12
TR17883|c0_g1_i2	60
TR17883|c0_g1_i4	68
TR17899|c0_g1_i1	18
TR17910|c0_g1_i1	24
TR17916|c0_g1_i1	16
TR17916|c0_g3_i1	14
TR17917|c0_g1_i1	26
TR18007|c0_g3_i1	20
TR18054|c0_g1_i1	18
TR18065|c0_g1_i1	12
TR18121|c0_g1_i1	12
TR18144|c0_g1_i1	14
TR1819|c0_g1_i1	22
TR18269|c0_g1_i1	24
TR18293|c0_g1_i1	44
TR18294|c0_g1_i1	14
TR18299|c0_g1_i1	26
TR18323|c0_g1_i1	12
TR18337|c0_g1_i1	16
TR18346|c0_g1_i1	10
TR18392|c0_g1_i1	12
TR18440|c0_g1_i1	28
TR18452|c0_g1_i1	28
TR1846|c0_g1_i1	14
TR18490|c0_g1_i1	20
TR1855|c0_g1_i1	26
TR18553|c0_g1_i2	20
TR18607|c0_g1_i3	20
TR18618|c0_g1_i1	22
TR18622|c0_g1_i1	16
TR18625|c0_g1_i1	28
TR18643|c0_g1_i1	42
TR18643|c0_g1_i2	24
TR18671|c1_g1_i2	18
TR18671|c2_g1_i2	50
TR18678|c0_g2_i1	20
TR18701|c1_g2_i1	14
TR18703|c0_g1_i1	12
TR18709|c0_g1_i1	26
TR18732|c0_g2_i1	12
TR18756|c0_g1_i1	12
TR18756|c0_g1_i3	38
TR18792|c1_g1_i1	18
TR18794|c0_g1_i1	14
TR18820|c0_g1_i1	18
TR1891|c0_g1_i1	34
TR1892|c0_g1_i1	50
TR18923|c0_g1_i1	12
TR18934|c0_g1_i1	16
TR18937|c0_g1_i1	32
TR19033|c0_g1_i2	16
TR19042|c0_g1_i1	24
TR19082|c0_g1_i1	12
TR19106|c0_g2_i3	22
TR19167|c0_g1_i2	32
TR19191|c0_g1_i1	24
TR19216|c0_g2_i1	20
TR19300|c0_g2_i2	44
TR19315|c0_g2_i1	12
TR19350|c0_g2_i1	14
TR19367|c0_g1_i2	12
TR19371|c0_g3_i2	12
TR19388|c0_g1_i1	16
TR19395|c0_g1_i3	28
TR19402|c0_g1_i1	12
TR19425|c0_g2_i1	24
TR19454|c0_g2_i1	12
TR19467|c0_g1_i1	22
TR19469|c1_g1_i1	18
TR19602|c0_g1_i1	10
TR19611|c0_g2_i1	14
TR19683|c0_g1_i1	28
TR19693|c0_g1_i1	30
TR19693|c0_g3_i1	22
TR19735|c0_g1_i1	16
TR19744|c0_g1_i1	14
TR19779|c0_g1_i1	26
TR1981|c0_g1_i2	10
TR19867|c0_g1_i2	20
TR19904|c0_g1_i3	76
TR19904|c0_g1_i4	74
TR19913|c0_g1_i1	18
TR19917|c0_g1_i1	16
TR19924|c0_g1_i1	20
TR19938|c0_g1_i2	30
TR1997|c0_g1_i2	64
TR19975|c0_g1_i1	18
TR19997|c0_g3_i2	22
TR20023|c0_g1_i2	22
TR20036|c0_g1_i1	34
TR20073|c0_g1_i1	36
TR20090|c0_g2_i2	24
TR20093|c0_g3_i1	16
TR20108|c0_g1_i2	14
TR20119|c0_g1_i1	32
TR20146|c0_g1_i1	18
TR20176|c0_g1_i1	14
TR20214|c0_g1_i2	26
TR20214|c0_g1_i3	18
TR20222|c0_g1_i1	20
TR20242|c0_g1_i2	12
TR20276|c0_g1_i4	276
TR20313|c0_g1_i4	616
TR20381|c0_g1_i3	16
TR20396|c0_g1_i2	10
TR20405|c0_g2_i1	22
TR20411|c0_g1_i1	14
TR20538|c0_g1_i1	16
TR20553|c0_g1_i3	26
TR20558|c0_g1_i1	12
TR20593|c0_g1_i2	24
TR20595|c0_g1_i1	42
TR2063|c0_g1_i1	68
TR20638|c0_g1_i1	16
TR20710|c1_g1_i1	30
TR20766|c0_g1_i1	20
TR20788|c0_g1_i2	32
TR20790|c0_g1_i2	18
TR20795|c0_g1_i1	14
TR20815|c0_g1_i2	16
TR20819|c0_g1_i1	12
TR2084|c0_g3_i1	12
TR20860|c0_g3_i1	12
TR20880|c0_g1_i1	68
TR20899|c0_g2_i1	56
TR21000|c0_g2_i1	20
TR21001|c0_g1_i5	48
TR21015|c0_g1_i1	38
TR21043|c1_g1_i1	86
TR21131|c0_g1_i1	28
TR21206|c1_g1_i1	22
TR21242|c0_g1_i1	10
TR21253|c0_g2_i1	20
TR21260|c0_g1_i1	20
TR21263|c0_g2_i1	22
TR21285|c1_g2_i1	16
TR2130|c0_g1_i1	32
TR2130|c0_g1_i2	28
TR21317|c0_g1_i2	22
TR21343|c0_g1_i4	16
TR21345|c0_g1_i2	14
TR21370|c0_g1_i1	146
TR21426|c0_g1_i4	16
TR21453|c2_g1_i1	14
TR21464|c0_g1_i2	16
TR21467|c0_g1_i1	12
TR21474|c0_g1_i2	28
TR21477|c0_g1_i3	72
TR2148|c0_g1_i1	22
TR21496|c0_g1_i1	24
TR21542|c0_g1_i1	26
TR21570|c0_g1_i1	32
TR21572|c0_g1_i1	40
TR2158|c0_g1_i3	30
TR2158|c0_g1_i4	40
TR21615|c0_g2_i1	18
TR2162|c0_g1_i2	34
TR21624|c0_g1_i2	48
TR21652|c0_g1_i1	46
TR21664|c0_g1_i1	64
TR21676|c0_g1_i1	26
TR2168|c0_g1_i2	32
TR21684|c0_g1_i1	20
TR21686|c0_g2_i1	16
TR21703|c0_g1_i1	16
TR2173|c0_g1_i1	80
TR2173|c0_g1_i2	46
TR2174|c1_g1_i2	16
TR2174|c1_g4_i1	30
TR21749|c0_g1_i1	16
TR2175|c1_g1_i1	34
TR2176|c0_g3_i2	50
TR2177|c0_g1_i4	48
TR2178|c1_g1_i2	10
TR2178|c6_g4_i1	30
TR21789|c0_g2_i1	22
TR21799|c0_g1_i2	14
TR2181|c0_g1_i1	20
TR21817|c0_g1_i1	16
TR21820|c0_g1_i2	34
TR21828|c0_g1_i1	42
TR21833|c0_g1_i1	20
TR21848|c0_g1_i2	28
TR2185|c0_g4_i1	20
TR21868|c0_g1_i3	36
TR2187|c0_g1_i6	68
TR21883|c0_g1_i1	16
TR21898|c0_g1_i1	12
TR21922|c0_g3_i1	46
TR2195|c0_g2_i1	16
TR21965|c0_g1_i2	30
TR2197|c0_g2_i3	22
TR21973|c0_g1_i1	20
TR21988|c0_g1_i1	38
TR2199|c0_g1_i2	96
TR2200|c0_g1_i2	80
TR2204|c0_g1_i4	26
TR22041|c0_g2_i2	20
TR2206|c0_g3_i2	20
TR22067|c0_g1_i3	16
TR22087|c0_g1_i1	16
TR2210|c0_g1_i2	112
TR22110|c0_g1_i1	40
TR2212|c0_g1_i1	12
TR22121|c1_g2_i1	22
TR22126|c0_g1_i1	30
TR22126|c0_g1_i2	24
TR22126|c0_g1_i3	22
TR22130|c0_g1_i2	16
TR2214|c3_g11_i1	234
TR22141|c0_g1_i1	40
TR22156|c0_g1_i1	12
TR22167|c0_g1_i1	46
TR2218|c1_g5_i2	14
TR22219|c0_g2_i1	18
TR22229|c0_g1_i2	56
TR22240|c1_g1_i1	14
TR22249|c0_g1_i4	22
TR22252|c0_g1_i2	56
TR22268|c0_g1_i1	14
TR22275|c0_g1_i1	30
TR22305|c0_g1_i3	12
TR22315|c0_g1_i2	26
TR22324|c0_g3_i1	26
TR22330|c0_g1_i2	22
TR2236|c0_g1_i2	34
TR22375|c0_g2_i1	22
TR22383|c0_g1_i1	102
TR22386|c0_g1_i2	22
TR22397|c0_g1_i3	22
TR2240|c0_g2_i1	12
TR2241|c0_g1_i1	26
TR2241|c0_g1_i4	18
TR22428|c0_g1_i1	20
TR22433|c0_g2_i1	12
TR2245|c7_g3_i1	28
TR2248|c1_g5_i1	16
TR22496|c0_g1_i1	78
TR22499|c0_g1_i1	22
TR2250|c2_g1_i1	22
TR2252|c0_g1_i1	50
TR2252|c0_g1_i3	28
TR22532|c0_g1_i2	50
TR22537|c0_g3_i1	18
TR22544|c0_g1_i3	16
TR2256|c2_g1_i2	12
TR2257|c0_g1_i2	68
TR2257|c0_g1_i4	16
TR22571|c0_g3_i1	20
TR22576|c0_g1_i2	16
TR22578|c0_g3_i1	18
TR2258|c1_g3_i1	18
TR22585|c0_g1_i1	20
TR22593|c0_g1_i1	10
TR22617|c0_g1_i1	40
TR2263|c1_g1_i13	70
TR22647|c0_g1_i3	36
TR2265|c0_g1_i1	14
TR22666|c0_g6_i3	22
TR22671|c0_g4_i1	28
TR22672|c0_g1_i3	16
TR22751|c0_g1_i2	26
TR22757|c0_g1_i1	32
TR22760|c0_g1_i1	16
TR22765|c1_g1_i1	30
TR22770|c0_g1_i2	28
TR22776|c0_g1_i1	14
TR22822|c0_g1_i4	30
TR22827|c0_g1_i3	28
TR22831|c0_g1_i2	22
TR22838|c0_g2_i1	16
TR22849|c0_g1_i1	24
TR2285|c0_g2_i13	30
TR2285|c0_g2_i3	38
TR22872|c2_g1_i1	32
TR22875|c0_g2_i3	14
TR22893|c0_g1_i1	16
TR22906|c0_g1_i1	30
TR22953|c0_g1_i1	18
TR2296|c0_g2_i4	36
TR22966|c0_g3_i1	18
TR22967|c0_g1_i2	20
TR2298|c0_g1_i3	56
TR2300|c0_g4_i3	16
TR23017|c0_g1_i1	22
TR23022|c0_g1_i1	18
TR23034|c0_g1_i3	18
TR23040|c0_g2_i1	16
TR23068|c0_g1_i1	38
TR23073|c0_g1_i1	100
TR23073|c0_g1_i2	168
TR2308|c3_g2_i1	20
TR2308|c4_g1_i1	34
TR2308|c4_g1_i7	12
TR23081|c0_g1_i1	58
TR23089|c0_g5_i1	16
TR23104|c0_g1_i2	22
TR23132|c0_g1_i1	18
TR23146|c0_g1_i1	32
TR23150|c1_g1_i2	42
TR23152|c0_g1_i1	18
TR23155|c0_g2_i1	16
TR23200|c1_g1_i5	32
TR23203|c0_g1_i1	20
TR2322|c0_g3_i1	22
TR23250|c1_g2_i1	16
TR23267|c0_g1_i2	24
TR23273|c0_g2_i3	18
TR23274|c0_g1_i4	20
TR23276|c0_g1_i1	34
TR23277|c0_g1_i1	32
TR2328|c0_g1_i6	24
TR2330|c0_g1_i4	12
TR23301|c0_g1_i1	38
TR2331|c0_g1_i2	30
TR23314|c0_g2_i1	18
TR23323|c0_g1_i1	26
TR23324|c1_g1_i1	18
TR23333|c0_g4_i1	18
TR23339|c0_g1_i3	30
TR23339|c0_g3_i1	36
TR23348|c0_g1_i3	340
TR23365|c0_g1_i2	38
TR23375|c0_g1_i5	18
TR23392|c0_g1_i2	12
TR23420|c0_g2_i1	10
TR23421|c0_g1_i1	28
TR23433|c0_g1_i2	28
TR2344|c0_g1_i3	52
TR2345|c0_g1_i4	36
TR2347|c0_g1_i3	24
TR23506|c0_g1_i1	16
TR23514|c0_g1_i3	16
TR23514|c0_g1_i4	28
TR2352|c0_g1_i3	30
TR23520|c0_g2_i1	14
TR23531|c0_g2_i2	42
TR23534|c0_g4_i1	20
TR23534|c0_g5_i1	78
TR23534|c0_g8_i1	30
TR2355|c1_g2_i2	30
TR2355|c1_g2_i6	56
TR2355|c2_g5_i2	26
TR23567|c0_g1_i1	32
TR2357|c0_g1_i3	28
TR23572|c0_g1_i2	14
TR23603|c0_g1_i4	24
TR2362|c0_g3_i1	14
TR23642|c0_g1_i2	16
TR23648|c0_g1_i1	16
TR23652|c0_g1_i1	32
TR2366|c0_g2_i6	24
TR23679|c0_g1_i1	34
TR2369|c0_g1_i4	10
TR23694|c0_g1_i3	30
TR23698|c0_g1_i1	22
TR2370|c0_g3_i2	24
TR23706|c1_g1_i4	62
TR2371|c0_g2_i1	106
TR23710|c0_g1_i2	42
TR23713|c1_g2_i2	28
TR2372|c0_g1_i1	12
TR2372|c0_g1_i3	52
TR2375|c0_g1_i4	54
TR23753|c0_g1_i3	18
TR2376|c0_g1_i1	34
TR23766|c0_g3_i1	56
TR23766|c0_g3_i2	16
TR2377|c0_g1_i2	52
TR23777|c0_g1_i1	64
TR23784|c0_g1_i1	22
TR23790|c0_g1_i1	16
TR23804|c0_g1_i1	42
TR23811|c0_g1_i1	14
TR23815|c0_g1_i2	30
TR23827|c0_g1_i1	18
TR23839|c0_g1_i2	42
TR23840|c0_g1_i1	28
TR23842|c0_g1_i3	34
TR2385|c0_g1_i3	18
TR23854|c0_g2_i2	16
TR2386|c0_g1_i1	30
TR23862|c0_g1_i1	122
TR2389|c0_g2_i4	18
TR23904|c0_g1_i1	36
TR23912|c0_g1_i2	52
TR23912|c0_g2_i1	44
TR23914|c0_g1_i4	28
TR23938|c0_g1_i1	160
TR23958|c0_g1_i1	70
TR23960|c0_g1_i1	40
TR2397|c0_g2_i1	24
TR23985|c0_g1_i1	20
TR23999|c0_g1_i7	18
TR24002|c0_g1_i2	44
TR24007|c0_g2_i1	16
TR24013|c0_g1_i1	18
TR2402|c1_g1_i6	44
TR24029|c0_g1_i2	16
TR24029|c0_g1_i3	24
TR24032|c0_g1_i2	62
TR24037|c0_g1_i3	28
TR2406|c0_g1_i1	56
TR2406|c0_g1_i2	46
TR24073|c0_g1_i2	14
TR2409|c0_g1_i1	18
TR24090|c0_g2_i3	20
TR24108|c0_g1_i1	48
TR24146|c1_g1_i3	24
TR24147|c0_g1_i1	22
TR24147|c0_g1_i3	32
TR2415|c3_g1_i1	16
TR2415|c3_g1_i2	18
TR24161|c0_g1_i2	40
TR24168|c0_g1_i1	62
TR24168|c0_g1_i2	90
TR24174|c0_g1_i1	28
TR2418|c0_g1_i1	16
TR24189|c1_g1_i1	36
TR2422|c2_g1_i2	40
TR2422|c2_g1_i7	30
TR24273|c0_g2_i1	50
TR24273|c0_g2_i2	18
TR24279|c0_g1_i3	12
TR24286|c0_g1_i2	16
TR24295|c0_g1_i2	26
TR24296|c0_g1_i1	20
TR24298|c0_g2_i1	22
TR24319|c0_g1_i2	38
TR24339|c0_g1_i2	22
TR24347|c0_g1_i2	32
TR24347|c0_g1_i4	42
TR24347|c0_g1_i5	22
TR24387|c0_g1_i2	20
TR24393|c0_g1_i3	26
TR24433|c0_g1_i1	30
TR24437|c0_g1_i3	20
TR24453|c0_g2_i1	14
TR24499|c0_g1_i1	42
TR24548|c0_g1_i1	22
TR24551|c0_g1_i2	10
TR2456|c0_g6_i1	14
TR24609|c0_g1_i2	32
TR2461|c1_g6_i1	16
TR24617|c0_g1_i1	28
TR24625|c0_g1_i5	24
TR24635|c0_g1_i4	30
TR24639|c0_g1_i2	128
TR24641|c0_g2_i1	14
TR24660|c2_g8_i1	12
TR2467|c2_g1_i5	32
TR24671|c0_g3_i3	26
TR24700|c0_g1_i1	34
TR24710|c0_g1_i2	44
TR24710|c0_g1_i3	16
TR24724|c0_g1_i2	38
TR2475|c0_g1_i1	178
TR24812|c0_g1_i4	20
TR24818|c0_g1_i4	26
TR24825|c0_g1_i1	34
TR2484|c0_g1_i1	14
TR2484|c0_g2_i1	26
TR24843|c0_g1_i2	16
TR2485|c2_g1_i5	22
TR2485|c3_g1_i1	24
TR2487|c0_g1_i4	48
TR2488|c0_g1_i1	48
TR24896|c0_g2_i1	16
TR24900|c1_g1_i2	64
TR24907|c1_g3_i1	20
TR24915|c0_g1_i1	52
TR24918|c0_g1_i1	10
TR24920|c0_g1_i1	78
TR24951|c0_g1_i1	50
TR24969|c0_g2_i1	24
TR2497|c0_g4_i2	16
TR24983|c0_g1_i3	12
TR24988|c0_g1_i3	20
TR25002|c0_g1_i1	14
TR25008|c0_g1_i3	28
TR25008|c0_g1_i5	32
TR25013|c0_g1_i1	146
TR25032|c0_g1_i2	18
TR25047|c0_g1_i1	20
TR25057|c0_g1_i2	26
TR25057|c0_g2_i1	18
TR25069|c0_g2_i1	32
TR2507|c0_g1_i5	20
TR25075|c0_g1_i4	24
TR25082|c1_g2_i1	20
TR25111|c0_g2_i3	96
TR25135|c0_g4_i1	22
TR25148|c0_g1_i2	32
TR2515|c0_g3_i2	24
TR25185|c0_g1_i1	32
TR2519|c0_g2_i1	26
TR25201|c0_g1_i4	38
TR25214|c0_g1_i3	26
TR25218|c0_g1_i4	18
TR25234|c0_g1_i1	20
TR25237|c0_g2_i2	18
TR25265|c0_g1_i1	266
TR25269|c0_g2_i1	18
TR25278|c0_g1_i9	14
TR25280|c1_g1_i6	28
TR25287|c0_g1_i1	28
TR25337|c0_g1_i1	28
TR25337|c0_g1_i6	28
TR25346|c0_g1_i1	32
TR25362|c0_g1_i1	24
TR25362|c0_g1_i3	28
TR25365|c0_g2_i1	44
TR25458|c1_g1_i1	22
TR25483|c0_g1_i1	20
TR25495|c0_g1_i3	88
TR25532|c0_g1_i1	28
TR25532|c1_g1_i1	64
TR25543|c0_g1_i1	20
TR25544|c1_g1_i3	22
TR2559|c2_g5_i2	16
TR25592|c1_g1_i1	58
TR25620|c0_g1_i1	14
TR25628|c0_g5_i1	16
TR25666|c1_g2_i10	28
TR25672|c0_g1_i1	22
TR25687|c0_g1_i2	18
TR2569|c0_g1_i6	14
TR25701|c3_g1_i1	22
TR25701|c3_g2_i1	26
TR25701|c3_g2_i4	36
TR25701|c3_g2_i8	36
TR25701|c3_g2_i9	22
TR25701|c4_g4_i1	16
TR25711|c0_g1_i1	22
TR25712|c0_g2_i1	30
TR25718|c0_g1_i4	20
TR2572|c0_g2_i2	18
TR25760|c0_g1_i2	30
TR25772|c0_g1_i1	20
TR25773|c0_g2_i1	14
TR25776|c0_g1_i4	64
TR25787|c0_g1_i1	16
TR2580|c0_g3_i8	14
TR25821|c1_g1_i3	28
TR25821|c1_g1_i6	36
TR25828|c0_g2_i2	34
TR25828|c0_g2_i3	30
TR25828|c0_g2_i4	14
TR25838|c0_g1_i2	34
TR25862|c0_g1_i1	12
TR2587|c0_g1_i2	34
TR25882|c0_g2_i2	16
TR25899|c0_g4_i1	238
TR25901|c0_g1_i1	36
TR25901|c0_g1_i2	46
TR25901|c0_g1_i3	54
TR25915|c0_g1_i1	50
TR25919|c0_g1_i1	14
TR25927|c0_g2_i2	22
TR25929|c0_g1_i3	44
TR25950|c0_g1_i3	14
TR25955|c0_g2_i2	22
TR25988|c0_g3_i1	30
TR25990|c0_g1_i1	14
TR25990|c0_g1_i2	34
TR25995|c1_g1_i3	34
TR25997|c0_g2_i1	78
TR2600|c0_g2_i1	26
TR26024|c0_g1_i5	34
TR26037|c0_g1_i3	14
TR26054|c0_g1_i1	34
TR26067|c0_g1_i3	26
TR26086|c0_g1_i4	174
TR26090|c0_g1_i1	32
TR26107|c0_g1_i1	22
TR26107|c0_g1_i3	22
TR2611|c0_g1_i1	14
TR26122|c0_g1_i5	30
TR26128|c1_g1_i1	32
TR26140|c0_g1_i5	50
TR26150|c0_g3_i1	50
TR2616|c0_g1_i2	68
TR26168|c0_g1_i1	20
TR26171|c0_g1_i2	18
TR26188|c3_g3_i1	20
TR26193|c0_g1_i5	70
TR2620|c5_g3_i8	14
TR26203|c0_g1_i5	36
TR26216|c0_g1_i2	22
TR26224|c0_g2_i1	18
TR26243|c0_g1_i1	28
TR26253|c0_g1_i2	16
TR26259|c1_g1_i1	64
TR26260|c0_g1_i1	30
TR26263|c0_g1_i1	42
TR26265|c0_g1_i2	20
TR26305|c0_g1_i3	54
TR26306|c0_g1_i1	22
[truncated: 5,977 more rows]

## Sheet: F1 specific
TrID	F1 Readcount
TR10664|c0_g1_i1	12
TR12586|c0_g1_i1	24
TR12658|c0_g1_i1	16
TR12717|c0_g1_i1	12
TR13295|c0_g1_i1	32
TR13421|c0_g1_i1	12
TR13460|c0_g1_i1	12
TR13983|c0_g2_i1	24
TR14036|c0_g1_i1	12
TR14725|c0_g1_i1	12
TR15032|c0_g1_i1	14
TR15275|c0_g1_i1	28
TR15727|c0_g1_i2	10
TR16030|c0_g1_i1	16
TR16374|c0_g1_i1	26
TR17308|c0_g1_i1	24
TR17786|c0_g1_i1	14
TR18073|c0_g1_i1	10
TR18266|c0_g1_i1	22
TR18349|c0_g1_i1	14
TR18350|c0_g1_i2	22
TR1845|c0_g1_i1	18
TR18718|c0_g1_i1	22
TR18744|c0_g1_i1	24
TR18868|c0_g1_i1	20
TR18900|c0_g1_i1	30
TR19153|c0_g1_i1	18
TR19565|c0_g1_i1	46
TR20489|c0_g1_i1	24
TR20757|c0_g2_i1	10
TR20930|c0_g2_i1	16
TR20966|c0_g1_i5	28
TR21216|c0_g2_i1	14
TR21405|c0_g1_i1	18
TR21496|c1_g3_i1	42
TR2161|c0_g3_i1	58
TR2165|c0_g2_i1	20
TR21716|c0_g1_i1	14
TR2176|c0_g1_i6	30
TR21761|c0_g1_i1	18
TR21795|c0_g1_i1	28
TR21831|c0_g1_i1	18
TR21877|c0_g1_i1	16
TR21883|c0_g1_i3	40
TR21941|c0_g1_i2	26
TR22013|c0_g1_i2	12
TR2228|c0_g1_i5	28
TR22284|c0_g1_i1	10
TR22307|c0_g1_i1	30
TR22372|c0_g1_i1	18
TR22528|c0_g1_i1	16
TR22652|c0_g1_i1	22
TR2284|c0_g2_i1	12
TR22867|c0_g1_i1	34
TR22920|c0_g1_i1	24
TR23141|c0_g1_i1	40
TR23160|c0_g1_i3	18
TR23232|c0_g1_i2	24
TR23292|c0_g1_i1	32
TR23305|c0_g1_i1	32
TR23377|c0_g1_i1	28
TR23582|c0_g1_i1	18
TR23670|c0_g1_i4	32
TR23733|c0_g3_i4	20
TR23887|c0_g3_i1	16
TR24035|c1_g2_i3	28
TR24050|c0_g1_i3	42
TR24068|c0_g2_i1	20
TR24069|c1_g1_i1	18
TR24211|c0_g6_i1	56
TR24338|c0_g1_i1	26
TR24505|c0_g1_i1	54
TR2460|c0_g1_i4	26
TR24619|c0_g1_i1	44
TR24636|c0_g1_i1	26
TR24739|c0_g1_i1	70
TR24790|c0_g1_i1	12
TR24810|c0_g1_i1	22
TR24844|c0_g1_i2	32
TR24870|c0_g3_i1	18
TR2489|c0_g3_i1	54
TR24931|c1_g1_i1	16
TR25083|c0_g1_i2	394
TR25122|c0_g1_i1	304
TR2534|c0_g2_i1	36
TR25367|c1_g1_i1	20
TR25520|c0_g2_i1	12
TR2554|c0_g3_i1	28
TR25588|c0_g1_i2	22
TR25698|c0_g1_i1	38
TR25736|c1_g1_i2	26
TR25810|c0_g1_i2	44
TR25951|c1_g2_i1	22
TR25991|c1_g1_i2	32
TR26085|c0_g1_i3	26
TR26100|c0_g2_i2	188
TR26216|c0_g4_i1	14
TR26228|c0_g1_i1	70
TR26275|c0_g1_i1	12
TR26534|c0_g1_i5	36
TR26581|c0_g1_i2	42
TR26617|c0_g1_i2	18
TR2662|c0_g1_i1	42
TR26719|c0_g1_i1	30
TR26766|c1_g1_i2	18
TR26978|c0_g2_i1	22
TR2701|c0_g1_i1	36
TR27091|c0_g2_i5	20
TR27108|c0_g1_i2	44
TR2712|c0_g2_i1	14
TR27164|c0_g1_i1	18
TR27194|c0_g1_i1	64
TR27288|c0_g1_i3	22
TR27303|c0_g1_i1	46
TR27396|c0_g3_i2	22
TR27404|c0_g1_i3	26
TR27695|c1_g1_i1	22
TR27731|c0_g1_i1	130
TR27740|c0_g1_i2	52
TR27743|c0_g1_i1	40
TR27751|c0_g1_i2	24
TR27806|c0_g1_i7	60
TR27848|c0_g3_i1	28
TR2793|c0_g7_i3	468
TR27937|c0_g1_i4	108
TR27941|c0_g2_i1	24
TR2798|c0_g1_i1	76
TR28000|c0_g2_i1	36
TR28049|c2_g1_i1	258
TR28093|c0_g1_i2	46
TR28103|c1_g1_i1	30
TR2812|c0_g1_i1	28
TR28135|c0_g1_i2	64
TR2833|c0_g1_i1	42
TR28338|c0_g2_i1	20
TR28393|c0_g2_i1	34
TR28524|c0_g1_i2	26
TR2856|c0_g1_i3	56
TR28662|c0_g1_i1	28
TR28701|c0_g1_i5	46
TR2872|c0_g2_i1	22
TR28731|c0_g1_i3	24
TR28758|c0_g1_i1	14
TR28790|c0_g1_i3	32
TR2880|c0_g2_i3	32
TR28832|c0_g1_i1	70
TR28832|c0_g1_i2	50
TR28867|c1_g4_i2	14
TR28976|c0_g1_i1	164
TR29027|c1_g1_i2	118
TR29030|c0_g1_i2	46
TR29061|c0_g1_i6	162
TR29079|c0_g1_i1	74
TR29098|c1_g1_i1	32
TR29163|c0_g1_i2	42
TR29181|c2_g1_i11	20
TR29197|c1_g1_i1	36
TR29247|c1_g1_i1	42
TR2925|c1_g2_i2	10
TR29284|c0_g1_i2	60
TR29322|c0_g2_i1	58
TR29338|c3_g6_i3	54
TR29406|c0_g1_i1	16
TR2941|c0_g1_i1	24
TR29510|c0_g1_i1	34
TR29570|c0_g1_i3	28
TR29631|c0_g1_i5	36
TR29681|c0_g1_i5	14
TR29707|c1_g1_i1	20
TR29732|c0_g1_i1	12
TR29760|c1_g1_i3	52
TR29764|c0_g4_i1	22
TR29768|c0_g1_i2	18
TR2978|c0_g1_i3	32
TR29797|c0_g2_i2	60
TR29819|c0_g1_i3	80
TR29849|c0_g1_i1	32
TR29904|c0_g1_i3	24
TR29928|c0_g4_i4	24
TR29933|c0_g1_i1	12
TR29936|c0_g1_i2	20
TR3000|c0_g1_i2	60
TR3001|c3_g3_i1	94
TR30034|c1_g1_i1	48
TR3004|c0_g1_i2	12
TR30050|c0_g5_i1	10
TR30086|c0_g2_i1	28
TR30139|c0_g4_i1	12
TR30140|c1_g3_i1	16
TR30145|c0_g1_i1	10
TR3016|c2_g1_i1	18
TR30184|c0_g1_i2	40
TR30199|c0_g1_i2	16
TR3026|c1_g4_i1	28
TR30265|c0_g3_i1	24
TR30310|c0_g1_i1	38
TR30316|c0_g3_i2	66
TR30454|c0_g2_i2	14
TR30515|c2_g2_i1	16
TR30667|c3_g2_i1	80
TR30697|c0_g3_i1	14
TR30804|c2_g2_i1	18
TR30853|c0_g4_i4	26
TR30859|c0_g2_i4	504
TR30884|c1_g4_i1	36
TR30898|c0_g2_i1	38
TR30950|c0_g5_i1	12
TR30984|c0_g2_i1	62
TR30989|c1_g2_i2	22
TR31072|c0_g1_i1	44
TR31080|c0_g4_i1	38
TR31117|c0_g1_i1	22
TR31119|c0_g2_i4	26
TR31158|c1_g3_i1	54
TR31218|c0_g4_i1	26
TR31218|c0_g9_i4	26
TR31343|c2_g3_i3	48
TR31360|c0_g1_i3	30
TR31410|c0_g3_i1	216
TR31410|c0_g3_i2	226
TR31424|c0_g1_i6	24
TR3144|c0_g2_i1	20
TR31461|c0_g1_i6	46
TR31474|c0_g3_i1	60
TR3153|c0_g2_i8	18
TR31568|c0_g2_i1	14
TR31575|c1_g1_i4	48
TR31665|c0_g1_i7	110
TR31686|c0_g1_i4	42
TR31705|c0_g2_i7	40
TR31761|c2_g8_i4	46
TR31761|c2_g9_i1	22
TR31781|c0_g4_i2	24
TR31800|c0_g1_i1	50
TR31892|c0_g3_i1	12
TR31910|c1_g1_i3	38
TR31928|c0_g2_i1	18
TR31950|c0_g2_i1	36
TR31996|c0_g1_i1	78
TR32079|c0_g1_i1	52
TR32112|c0_g3_i1	30
TR32159|c0_g1_i1	40
TR3219|c0_g1_i4	94
TR32283|c0_g2_i4	30
TR3230|c1_g7_i2	32
TR32326|c0_g2_i4	22
TR32362|c0_g1_i1	16
TR32404|c0_g4_i3	132
TR3247|c1_g4_i2	62
TR32477|c0_g2_i2	138
TR3251|c0_g2_i3	28
TR32544|c0_g1_i3	84
TR32632|c0_g3_i2	24
TR32675|c1_g3_i1	22
TR32714|c1_g4_i1	16
TR32723|c0_g1_i1	46
TR32726|c1_g1_i3	50
TR32729|c0_g1_i1	30
TR32741|c1_g2_i5	366
TR32752|c0_g1_i4	40
TR32772|c0_g1_i2	30
TR32775|c0_g1_i2	30
TR32782|c0_g2_i1	96
TR3281|c0_g5_i2	24
TR32814|c2_g5_i1	10
TR3283|c0_g5_i1	96
TR32849|c1_g1_i1	94
TR32915|c0_g1_i3	20
TR3292|c0_g2_i2	54
TR32927|c0_g1_i1	80
TR32951|c0_g1_i4	46
TR32956|c0_g2_i1	16
TR32977|c0_g6_i3	16
TR32995|c0_g5_i1	94
TR33078|c2_g1_i3	32
TR3308|c0_g1_i2	16
TR33082|c1_g1_i2	64
TR33082|c1_g1_i3	38
TR33082|c1_g1_i5	70
TR33097|c0_g1_i1	14
TR33097|c0_g2_i1	10
TR33134|c0_g1_i3	16
TR3314|c0_g6_i1	26
TR33151|c0_g2_i1	26
TR33160|c0_g3_i5	12
TR33182|c1_g2_i1	12
TR33199|c0_g1_i2	94
TR3323|c0_g1_i4	38
TR33258|c1_g4_i8	22
TR33347|c0_g2_i1	16
TR33348|c0_g1_i3	24
TR33365|c0_g1_i2	62
TR33381|c2_g1_i6	52
TR33397|c0_g4_i1	32
TR33414|c0_g4_i1	16
TR33430|c0_g4_i3	82
TR3346|c1_g3_i3	48
TR33584|c0_g2_i1	54
TR33585|c1_g3_i3	58
TR33590|c0_g1_i3	102
TR33618|c0_g1_i3	22
TR33720|c0_g1_i3	32
TR33736|c0_g2_i8	32
TR33754|c0_g4_i2	40
TR33798|c0_g1_i1	58
TR33802|c0_g3_i3	40
TR33807|c0_g4_i1	28
TR33816|c0_g2_i1	112
TR33858|c0_g1_i1	80
TR33907|c0_g1_i1	12
TR33957|c0_g1_i2	76
TR33966|c1_g3_i1	90
TR33991|c1_g4_i4	64
TR33998|c3_g3_i1	28
TR34008|c0_g1_i1	62
TR34029|c0_g1_i1	12
TR34038|c1_g6_i1	24
TR34058|c0_g1_i2	48
TR34060|c0_g1_i9	90
TR34075|c2_g7_i4	12
TR3408|c0_g1_i6	22
TR34080|c2_g3_i3	16
TR34145|c0_g2_i2	44
TR34146|c0_g1_i3	96
TR34180|c0_g1_i6	40
TR34224|c0_g1_i3	66
TR34227|c0_g1_i3	44
TR34229|c2_g3_i1	22
TR34245|c0_g2_i2	16
TR34274|c0_g1_i3	32
TR34294|c0_g1_i1	600
TR34317|c0_g2_i3	44
TR34391|c0_g1_i5	16
TR34398|c1_g4_i1	78
TR34405|c0_g1_i5	50
TR34411|c0_g4_i1	20
TR3442|c0_g4_i1	36
TR34477|c1_g3_i1	28
TR34490|c0_g1_i3	96
TR34531|c0_g4_i1	24
TR34552|c0_g2_i4	100
TR34553|c1_g2_i1	36
TR3458|c0_g1_i4	132
TR34583|c1_g3_i1	28
TR34658|c5_g1_i2	96
TR34672|c0_g1_i7	20
TR34693|c0_g1_i3	86
TR34708|c0_g1_i1	12
TR34925|c0_g1_i1	16
TR34936|c0_g1_i1	40
TR34971|c0_g2_i1	28
TR34992|c0_g6_i3	16
TR35026|c0_g1_i2	114
TR35074|c1_g1_i6	24
TR35098|c0_g1_i2	36
TR35129|c0_g1_i8	22
TR35160|c3_g3_i1	20
TR35186|c0_g2_i1	24
TR3522|c0_g3_i1	20
TR35229|c1_g2_i3	14
TR3524|c0_g3_i6	34
TR35259|c0_g1_i3	26
TR35259|c0_g2_i1	18
TR35278|c0_g2_i8	20
TR35340|c1_g3_i1	18
TR35362|c0_g6_i1	26
TR35383|c1_g1_i1	30
TR35465|c0_g8_i1	28
TR35491|c1_g1_i1	56
TR35491|c1_g4_i2	84
TR35578|c0_g1_i1	98
TR35592|c0_g7_i2	30
TR35597|c1_g1_i2	154
TR35597|c1_g1_i3	52
TR35605|c0_g1_i4	18
TR35611|c0_g1_i1	26
TR35676|c1_g1_i1	80
TR35677|c0_g1_i1	92
TR35721|c2_g3_i5	40
TR35730|c0_g2_i1	20
TR35739|c0_g1_i7	12
TR3578|c1_g1_i1	42
TR35804|c0_g2_i2	12
TR35873|c0_g7_i1	48
TR35879|c0_g2_i1	66
TR35922|c0_g1_i7	22
TR35929|c0_g3_i4	42
TR35933|c0_g1_i3	82
TR35969|c0_g5_i6	22
TR35978|c0_g4_i1	24
TR3600|c0_g2_i1	158
TR36001|c0_g1_i1	42
TR36001|c0_g3_i4	102
TR36016|c0_g1_i1	110
TR36024|c0_g4_i4	26
TR36034|c0_g4_i4	14
TR36049|c3_g2_i1	30
TR36079|c0_g2_i2	76
TR36110|c0_g1_i1	18
TR36118|c1_g1_i3	22
TR36130|c0_g2_i1	24
TR36150|c1_g3_i1	16
TR36164|c0_g2_i2	38
TR36173|c0_g2_i4	24
TR36177|c0_g2_i4	34
TR3618|c0_g7_i2	32
TR36208|c0_g1_i3	128
TR36216|c2_g1_i4	26
TR36218|c1_g1_i13	38
TR36257|c1_g1_i3	74
TR36261|c1_g2_i1	18
TR36268|c1_g3_i3	66
TR36273|c0_g5_i1	18
TR36325|c0_g1_i1	92
TR36325|c0_g1_i10	52
TR36347|c0_g4_i3	26
TR36357|c0_g6_i2	14
TR36437|c0_g14_i1	16
TR36439|c0_g2_i8	30
TR36452|c0_g1_i1	76
TR36496|c1_g1_i1	40
TR36497|c0_g3_i4	24
TR36502|c1_g2_i1	54
TR36513|c0_g2_i3	102
TR36521|c0_g2_i1	14
TR36538|c0_g1_i2	60
TR3655|c0_g1_i6	46
TR36551|c1_g1_i1	26
TR36560|c1_g4_i1	26
TR36603|c1_g1_i2	94
TR36634|c1_g1_i1	50
TR36643|c1_g5_i5	26
TR36653|c0_g1_i5	60
TR36680|c0_g4_i1	50
TR36680|c0_g6_i1	128
TR36680|c0_g6_i2	52
TR36689|c0_g4_i1	22
TR36771|c1_g2_i10	56
TR36796|c0_g3_i1	36
TR36833|c0_g1_i1	20
TR36878|c0_g1_i8	34
TR36882|c0_g1_i4	20
TR36897|c2_g1_i1	12
TR36919|c0_g1_i5	64
TR36931|c0_g1_i3	46
TR36936|c0_g2_i7	168
TR36960|c0_g1_i2	72
TR36965|c1_g10_i2	12
TR36988|c1_g4_i3	76
TR37011|c0_g6_i5	18
TR37015|c1_g3_i5	24
TR37109|c1_g1_i1	66
TR37122|c0_g3_i7	22
TR37124|c0_g1_i5	54
TR37138|c0_g4_i5	14
TR37173|c0_g1_i2	10
TR37196|c0_g1_i2	16
TR37212|c0_g2_i2	42
TR37213|c0_g9_i1	18
TR37226|c0_g2_i1	12
TR37262|c1_g1_i1	34
TR37270|c0_g1_i9	12
TR37276|c1_g2_i2	46
TR37288|c0_g2_i1	14
TR37299|c0_g1_i1	400
TR37305|c0_g4_i3	138
TR37311|c0_g2_i4	56
TR37335|c0_g1_i3	72
TR37338|c0_g1_i3	104
TR37339|c0_g5_i3	34
TR37358|c0_g1_i1	12
TR37358|c0_g2_i2	50
TR37377|c0_g9_i1	32
TR37421|c0_g1_i2	84
TR37422|c0_g4_i2	14
TR37432|c0_g5_i1	22
TR3744|c0_g6_i1	18
TR3748|c0_g4_i1	12
TR37539|c0_g2_i4	46
TR3756|c1_g4_i1	94
TR37566|c0_g1_i6	54
TR3758|c0_g4_i1	20
TR37603|c1_g1_i4	16
TR37663|c2_g1_i1	20
TR37679|c0_g2_i2	40
TR37697|c0_g7_i2	24
TR37700|c1_g1_i3	32
TR37731|c0_g2_i1	12
TR37736|c0_g5_i2	24
TR37740|c0_g2_i9	20
TR37778|c1_g1_i1	40
TR37786|c1_g7_i1	40
TR3784|c0_g1_i3	104
TR37842|c0_g3_i1	22
TR37877|c0_g2_i2	20
TR37902|c0_g4_i1	16
TR37922|c1_g1_i1	106
TR37932|c0_g9_i1	16
TR37968|c1_g2_i1	16
TR38018|c0_g2_i1	16
TR38020|c0_g1_i1	138
TR38023|c0_g4_i3	120
TR3803|c0_g3_i2	16
TR38032|c0_g1_i10	32
TR38066|c0_g1_i3	58
TR38077|c0_g6_i1	10
TR38099|c1_g1_i11	60
TR38193|c0_g1_i6	22
TR38248|c0_g1_i6	34
TR38307|c0_g1_i4	42
TR38309|c0_g5_i1	20
TR38422|c0_g1_i1	74
TR38429|c0_g1_i2	18
TR38441|c0_g2_i3	42
TR38486|c1_g2_i2	24
TR38523|c0_g1_i1	12
TR3857|c0_g1_i1	46
TR38631|c1_g1_i3	34
TR3864|c0_g1_i5	48
TR38644|c0_g1_i7	30
TR38657|c0_g1_i1	616
TR3869|c0_g2_i1	48
TR38699|c2_g2_i2	12
TR38742|c0_g2_i1	24
TR38759|c0_g2_i5	30
TR38771|c1_g1_i4	20
TR38778|c0_g1_i1	32
TR38779|c0_g3_i7	54
TR38782|c0_g1_i4	36
TR38792|c1_g2_i1	40
TR38813|c0_g6_i1	18
TR38865|c0_g4_i1	34
TR38916|c0_g2_i3	68
TR3893|c0_g1_i1	34
TR38934|c0_g1_i1	106
TR38969|c0_g2_i2	20
TR38987|c0_g1_i2	96
TR39003|c0_g7_i1	16
TR3904|c0_g1_i1	24
TR39046|c0_g1_i1	32
TR39106|c1_g1_i1	14
TR39136|c0_g3_i4	22
TR39174|c0_g4_i3	42
TR39182|c1_g2_i4	26
TR39190|c0_g1_i1	18
TR39203|c1_g2_i2	26
TR39203|c1_g3_i2	30
TR39212|c1_g1_i9	30
TR39253|c0_g1_i1	64
TR39259|c0_g4_i1	26
TR39265|c0_g1_i2	22
TR39311|c0_g3_i1	22
TR39317|c0_g1_i1	16
TR39330|c0_g3_i3	100
TR39349|c0_g2_i2	30
TR39372|c0_g2_i14	74
TR39372|c0_g2_i16	86
TR39373|c1_g1_i6	30
TR39379|c0_g1_i1	52
TR39418|c0_g8_i1	32
TR39435|c1_g2_i2	40
TR39442|c3_g1_i1	32
TR39457|c0_g7_i1	18
TR39458|c0_g3_i3	48
TR39527|c3_g1_i10	134
TR39542|c0_g10_i5	52
TR39562|c2_g5_i1	20
TR39564|c0_g6_i1	26
TR39608|c0_g10_i1	22
TR3961|c0_g1_i2	54
TR39615|c2_g3_i7	32
TR39619|c2_g3_i2	20
TR39631|c0_g1_i1	54
TR39638|c1_g4_i1	56
TR39665|c0_g3_i1	18
TR39669|c0_g2_i1	72
TR39715|c0_g5_i1	20
TR39718|c1_g1_i10	14
TR39724|c0_g1_i4	40
TR39824|c0_g1_i3	104
TR39838|c0_g1_i1	16
TR39844|c1_g1_i1	12
TR3986|c0_g3_i14	52
TR39862|c0_g3_i3	48
TR39920|c0_g10_i3	26
TR39932|c0_g1_i5	18
TR39982|c0_g3_i6	20
TR40012|c0_g4_i1	20
TR40013|c1_g5_i4	82
TR40066|c0_g1_i1	24
TR40066|c0_g6_i2	52
TR40101|c0_g4_i1	18
TR40134|c0_g4_i5	82
TR4019|c1_g12_i1	24
TR40215|c0_g4_i3	30
TR40257|c0_g1_i1	38
TR40285|c0_g4_i2	104
TR40384|c0_g1_i1	72
TR40413|c1_g2_i1	32
TR40413|c1_g5_i1	12
TR40427|c1_g4_i5	1294
TR40437|c0_g1_i2	40
TR40438|c0_g1_i2	46
TR40438|c0_g4_i1	30
TR40456|c0_g5_i1	18
TR40473|c0_g3_i3	20
TR40498|c0_g1_i5	36
TR40521|c0_g2_i9	10
TR40530|c0_g1_i1	72
TR40534|c0_g1_i3	12
TR40548|c0_g1_i5	30
TR4055|c1_g1_i2	30
TR40556|c0_g1_i2	112
TR40572|c0_g1_i1	12
TR40573|c0_g1_i5	54
TR40627|c0_g5_i1	26
TR40644|c2_g2_i1	14
TR40660|c0_g1_i10	68
TR40665|c2_g3_i1	28
TR40689|c0_g1_i3	126
TR40732|c0_g5_i8	86
TR40757|c3_g5_i1	36
TR40777|c4_g13_i6	50
TR40780|c0_g4_i4	22
TR40815|c0_g3_i1	34
TR40816|c2_g5_i2	34
TR40827|c0_g5_i1	30
TR40832|c0_g2_i1	112
TR40848|c0_g1_i5	46
TR40848|c0_g2_i2	100
TR40858|c0_g2_i7	12
TR40883|c0_g1_i2	12
TR40891|c1_g2_i3	26
TR40926|c0_g1_i1	14
TR40939|c2_g9_i1	14
TR40947|c1_g4_i1	10
TR40958|c0_g1_i5	70
TR4096|c0_g3_i1	74
TR40985|c0_g1_i8	28
TR41029|c0_g1_i6	24
TR41039|c0_g5_i1	22
TR41048|c0_g1_i4	100
TR41071|c0_g1_i11	286
TR41149|c0_g7_i3	14
TR41210|c0_g4_i1	16
TR41213|c2_g1_i4	22
TR41254|c0_g3_i2	36
TR41260|c0_g2_i5	36
TR41303|c0_g1_i11	28
TR41303|c0_g1_i5	24
TR41303|c0_g1_i7	50
TR41308|c0_g4_i2	36
TR41317|c0_g1_i2	26
TR41318|c0_g1_i2	42
TR41328|c1_g3_i7	18
TR41380|c0_g6_i1	18
TR41390|c0_g4_i1	18
TR41392|c0_g4_i1	30
TR41401|c0_g6_i1	20
TR41405|c0_g7_i2	26
TR41408|c0_g1_i1	16
TR41409|c2_g1_i1	14
TR41411|c0_g1_i2	122
TR41462|c0_g8_i1	36
TR41475|c0_g1_i4	66
TR41566|c1_g1_i6	68
TR41574|c1_g1_i3	24
TR41595|c1_g5_i1	38
TR41618|c1_g2_i1	16
TR41640|c0_g3_i2	28
TR41651|c2_g3_i2	16
TR41656|c0_g9_i1	14
TR41659|c0_g1_i2	88
TR41704|c0_g1_i1	60
TR41746|c0_g1_i4	194
TR41774|c0_g6_i1	68
TR41803|c0_g1_i2	18
TR41856|c0_g1_i3	20
TR41859|c0_g6_i1	18
TR41866|c1_g1_i1	50
TR41878|c0_g1_i2	106
TR41878|c0_g1_i5	104
TR41887|c0_g1_i1	14
TR41888|c0_g1_i3	94
TR41890|c1_g2_i1	12
TR41894|c0_g1_i1	16
TR41895|c0_g3_i1	28
TR41903|c1_g3_i4	26
TR41906|c0_g1_i3	32
TR41920|c0_g3_i1	26
TR41927|c0_g1_i1	14
TR41955|c1_g1_i1	16
TR41974|c0_g8_i4	64
TR41985|c0_g1_i1	252
TR41988|c0_g1_i7	18
TR41997|c0_g2_i1	34
TR42006|c1_g5_i4	16
TR42013|c1_g2_i4	32
TR42019|c0_g2_i2	24
TR42035|c0_g7_i2	22
TR42039|c0_g1_i2	80
TR42061|c0_g1_i4	12
TR42064|c0_g1_i2	102
TR42083|c0_g7_i1	12
TR42108|c0_g1_i1	14
TR42169|c0_g4_i1	16
TR42176|c0_g1_i1	16
TR42182|c0_g1_i1	16
TR42184|c1_g2_i1	12
TR42272|c0_g3_i1	78
TR42324|c2_g3_i1	18
TR42356|c1_g9_i3	12
TR42359|c0_g4_i1	44
TR42393|c1_g1_i2	16
TR42401|c0_g2_i2	34
TR42407|c0_g7_i2	58
TR42414|c0_g2_i1	34
TR42422|c0_g1_i2	144
TR42435|c1_g2_i19	28
TR42440|c0_g1_i1	76
TR42441|c0_g1_i1	24
TR42442|c1_g1_i1	12
TR42442|c1_g2_i2	16
TR42445|c0_g2_i1	24
TR42512|c0_g3_i3	18
TR42514|c1_g1_i1	58
TR42519|c0_g2_i1	24
TR42524|c1_g2_i7	62
TR42540|c0_g1_i6	32
TR42594|c0_g3_i1	22
TR42610|c2_g9_i1	52
TR42661|c0_g4_i1	28
TR42668|c1_g2_i2	14
TR42682|c0_g1_i3	36
TR42708|c0_g1_i2	82
TR42716|c0_g5_i3	60
TR42717|c0_g4_i1	20
TR42723|c2_g2_i1	20
TR42746|c0_g1_i1	158
TR42749|c1_g3_i4	40
TR42767|c0_g7_i1	30
TR42767|c0_g9_i2	14
TR42803|c0_g1_i4	50
TR42806|c0_g12_i1	14
TR42831|c0_g2_i7	40
TR42832|c0_g1_i1	52
TR42840|c0_g1_i1	64
TR42845|c0_g4_i4	24
TR42849|c0_g4_i1	10
TR42858|c0_g10_i3	34
TR42868|c1_g1_i7	46
TR42874|c0_g1_i3	18
TR42887|c1_g1_i1	10
TR42889|c1_g1_i2	36
TR42919|c0_g1_i3	18
TR42923|c2_g8_i1	18
TR42932|c1_g2_i1	12
TR42941|c0_g1_i1	22
TR42944|c0_g1_i2	52
TR42981|c0_g1_i3	52
TR42982|c0_g2_i1	16
TR42998|c0_g9_i6	24
TR43011|c1_g1_i5	24
TR43038|c0_g1_i3	22
TR43042|c1_g6_i3	18
TR43042|c1_g9_i1	16
TR43071|c0_g2_i5	16
TR43075|c0_g6_i2	164
TR43076|c0_g2_i13	12
TR43078|c0_g1_i3	24
TR43078|c0_g1_i8	26
TR43103|c0_g8_i1	18
TR43103|c0_g9_i1	24
TR43108|c4_g8_i1	26
TR43126|c2_g3_i5	40
TR43190|c1_g1_i3	16
TR43237|c3_g1_i3	14
TR43251|c0_g1_i2	22
TR43275|c0_g1_i1	36
TR43293|c0_g1_i4	40
TR43311|c1_g1_i2	12
TR43313|c0_g1_i1	14
TR43320|c0_g1_i1	20
TR43359|c1_g4_i3	30
TR43371|c2_g1_i1	168
TR43371|c2_g1_i2	46
TR43394|c1_g4_i1	14
TR43406|c1_g1_i5	60
TR43419|c1_g1_i2	18
TR43423|c0_g4_i1	16
TR43465|c1_g4_i1	50
TR43473|c0_g1_i1	44
TR43481|c0_g2_i1	14
TR43595|c1_g4_i3	16
TR43609|c1_g2_i1	12
TR43652|c0_g8_i1	14
TR43654|c0_g7_i1	18
TR43661|c2_g2_i3	12
TR43666|c3_g2_i3	18
TR43683|c2_g2_i1	32
TR43683|c3_g1_i4	50
TR43684|c0_g2_i2	16
TR43718|c0_g1_i3	28
TR43734|c0_g1_i4	308
TR43734|c0_g2_i4	28
TR43737|c0_g1_i2	50
TR43753|c0_g1_i6	126
TR43797|c2_g2_i6	58
TR43800|c2_g8_i5	40
TR43807|c0_g5_i1	36
TR43826|c1_g4_i1	24
TR43828|c0_g1_i4	12
TR43851|c0_g1_i3	46
TR43863|c0_g7_i1	24
TR43907|c1_g1_i8	50
TR43941|c0_g18_i1	24
TR43948|c2_g3_i1	46
TR43964|c0_g9_i7	48
TR43988|c0_g2_i1	20
TR44006|c0_g1_i1	28
TR44006|c0_g2_i1	10
TR44019|c0_g2_i2	14
TR44024|c0_g3_i1	12
TR44034|c3_g1_i3	48
TR44039|c1_g20_i2	18
TR44060|c0_g1_i1	26
TR44060|c0_g5_i3	88
TR44072|c5_g1_i1	54
TR44072|c5_g1_i2	194
TR44081|c3_g4_i1	42
TR44090|c0_g4_i1	12
TR44114|c0_g1_i8	88
TR44127|c1_g3_i1	22
TR44158|c1_g5_i1	10
TR44170|c1_g1_i2	38
TR44184|c3_g1_i3	46
TR44204|c1_g5_i1	16
TR44215|c1_g7_i3	36
TR44230|c0_g1_i1	20
TR44237|c0_g1_i1	22
TR44261|c2_g4_i1	42
TR44281|c0_g4_i1	16
TR44309|c1_g2_i2	46
TR44319|c1_g2_i1	30
TR44325|c0_g3_i2	146
TR44335|c2_g1_i2	62
TR44363|c0_g1_i1	30
TR44363|c0_g2_i1	30
TR44369|c1_g3_i1	28
TR44370|c0_g2_i1	48
TR44370|c0_g3_i1	16
TR44370|c0_g5_i3	14
TR44406|c1_g2_i1	16
TR44419|c1_g1_i5	58
TR44437|c0_g1_i4	42
TR44450|c0_g1_i1	16
TR44461|c1_g2_i3	82
TR44474|c2_g2_i1	14
TR44482|c1_g1_i4	34
TR44533|c2_g1_i4	44
TR44536|c2_g5_i1	20
TR44555|c2_g1_i1	16
TR44555|c2_g3_i5	14
TR44577|c0_g2_i2	140
TR44597|c1_g3_i1	58
TR44608|c0_g1_i2	56
TR44609|c8_g8_i1	20
TR44619|c0_g1_i2	120
TR44624|c1_g3_i1	44
TR44648|c1_g2_i3	102
TR44649|c0_g2_i4	76
TR44658|c1_g1_i3	40
TR44658|c1_g1_i4	52
TR44670|c2_g4_i2	12
TR44675|c2_g1_i3	86
TR44683|c2_g3_i1	24
TR44695|c1_g1_i5	26
TR44695|c1_g2_i3	20
TR44697|c14_g2_i5	10
TR44704|c2_g5_i2	18
TR44714|c1_g1_i1	58
TR44722|c1_g1_i2	176
TR44737|c2_g1_i1	66
TR44746|c2_g1_i2	16
TR44767|c1_g2_i4	20
TR44775|c0_g3_i1	22
TR44785|c0_g1_i2	36
TR44801|c1_g1_i4	20
TR44801|c3_g4_i2	22
TR44802|c0_g2_i2	34
TR44808|c3_g1_i1	20
TR44808|c4_g3_i2	32
TR44808|c4_g3_i3	68
TR44808|c4_g4_i2	16
TR44811|c1_g2_i1	36
TR44816|c0_g1_i1	20
TR44816|c0_g2_i1	62
TR44833|c5_g2_i2	14
TR44834|c3_g3_i1	38
TR44873|c0_g2_i4	114
TR44878|c4_g3_i4	30
TR44882|c0_g2_i5	74
TR6792|c0_g1_i1	12
TR7028|c0_g1_i1	34
TR7045|c0_g1_i1	28
TR7112|c0_g1_i1	18
TR7278|c0_g1_i1	56
TR7281|c0_g1_i4	24
TR7450|c0_g1_i2	40
TR7468|c0_g1_i1	40
TR7498|c0_g1_i2	48
TR7585|c0_g1_i7	70
TR7647|c1_g1_i15	14
TR7647|c1_g2_i4	80
TR7647|c1_g4_i1	30
TR7678|c2_g1_i3	168
TR7681|c0_g1_i1	58
TR7715|c1_g1_i2	70
TR7730|c0_g2_i1	42
TR7748|c2_g1_i1	22
TR7783|c0_g7_i1	16
TR7792|c0_g1_i7	54
TR7804|c0_g2_i1	22
TR7810|c0_g1_i3	92
TR7817|c0_g2_i1	44
TR7901|c0_g1_i3	20
TR7903|c2_g1_i2	48
TR7922|c0_g3_i1	24
TR7928|c0_g3_i1	32
TR7934|c2_g2_i1	52
TR7934|c2_g2_i4	74
TR8027|c1_g1_i9	56
TR8038|c1_g3_i3	16
TR8048|c3_g2_i1	26
TR8064|c0_g3_i3	46
TR8131|c1_g1_i5	14
TR8133|c0_g3_i5	30
TR8148|c1_g2_i3	14
TR8162|c2_g7_i1	26
TR8169|c0_g1_i9	30
TR8178|c2_g7_i1	30
TR8213|c1_g3_i1	30
TR8218|c2_g4_i1	24
TR8230|c2_g2_i6	32
TR8234|c1_g3_i1	62
TR8279|c0_g2_i5	94
TR8308|c1_g1_i2	58
TR10027|c0_g1_i2	38
TR10115|c0_g1_i1	16
TR10261|c0_g1_i1	34
TR10510|c0_g1_i1	24
TR10583|c0_g1_i1	22
TR10629|c0_g1_i2	64
TR10646|c0_g2_i1	16
TR10664|c0_g1_i2	10
TR10688|c0_g1_i1	20
TR1086|c0_g1_i1	14
TR1086|c0_g2_i1	24
TR1110|c0_g1_i1	20
TR11137|c0_g1_i1	34
TR11150|c0_g1_i1	14
TR11265|c0_g2_i1	24
TR11308|c0_g2_i1	14
TR11525|c0_g1_i1	30
TR11529|c0_g2_i1	16
TR11728|c0_g1_i1	14
TR11735|c0_g1_i1	18
TR11962|c0_g1_i1	62
TR12093|c0_g2_i1	122
TR12150|c0_g1_i1	16
TR12237|c0_g1_i1	86
TR12240|c0_g1_i1	14
TR12292|c0_g1_i1	20
TR12292|c0_g2_i1	34
TR12296|c1_g1_i1	28
TR12307|c0_g1_i1	142
TR12375|c0_g2_i1	58
TR12415|c0_g2_i1	30
TR12721|c0_g1_i1	44
TR12722|c0_g1_i1	16
TR12848|c0_g1_i1	14
TR12883|c0_g1_i1	18
TR12918|c0_g1_i1	14
TR13065|c0_g1_i1	34
TR1309|c0_g1_i1	16
TR13127|c0_g2_i1	10
TR13225|c0_g1_i1	42
TR13397|c0_g2_i1	26
TR13452|c0_g1_i1	12
TR13568|c0_g1_i1	62
TR13572|c0_g1_i1	22
TR13592|c0_g1_i1	20
TR13697|c1_g3_i1	48
TR13733|c0_g1_i1	22
TR1378|c0_g1_i1	18
TR13780|c0_g1_i1	18
TR13961|c0_g1_i1	32
TR14004|c0_g1_i1	20
TR14006|c0_g1_i1	50
TR14020|c0_g2_i1	16
TR14027|c0_g2_i1	14
TR14055|c0_g1_i1	12
TR14316|c0_g1_i1	60
TR14365|c0_g1_i1	16
TR14384|c0_g1_i1	14
TR14496|c0_g1_i1	12
TR14595|c0_g1_i1	38
TR146|c0_g2_i1	24
TR14614|c0_g1_i1	12
TR14674|c0_g1_i1	12
TR1481|c0_g1_i1	18
TR14845|c0_g1_i1	32
TR14899|c0_g1_i1	10
TR14947|c0_g1_i1	10
TR14962|c0_g1_i1	12
TR1500|c0_g1_i1	16
TR15015|c0_g1_i2	24
TR1505|c0_g2_i1	18
TR15187|c0_g1_i1	10
TR15229|c0_g1_i2	22
TR1527|c0_g1_i1	20
TR15302|c0_g1_i2	16
TR15305|c0_g1_i1	40
TR15305|c0_g1_i2	122
TR15508|c0_g1_i1	16
TR15523|c0_g1_i1	18
TR15524|c0_g1_i1	22
TR15646|c0_g1_i1	116
TR15662|c0_g1_i1	24
TR15756|c0_g2_i1	12
TR15773|c0_g1_i1	42
TR15775|c0_g1_i1	108
TR15797|c0_g1_i1	16
TR15945|c0_g1_i2	20
TR15999|c0_g1_i1	18
TR16005|c0_g1_i1	20
TR16124|c0_g1_i1	20
TR16143|c0_g1_i1	20
TR16157|c0_g1_i1	30
TR16159|c0_g1_i1	20
TR16225|c0_g1_i2	20
TR16326|c0_g3_i1	30
TR16363|c0_g1_i1	216
TR16379|c0_g1_i1	18
TR16524|c0_g1_i1	10
TR16584|c0_g1_i1	14
TR16633|c0_g1_i1	14
TR16698|c0_g2_i1	14
TR16756|c0_g1_i1	14
TR16781|c0_g1_i1	14
TR16782|c0_g1_i1	26
TR16782|c0_g1_i3	24
TR16782|c0_g1_i4	28
TR17006|c0_g1_i1	14
TR17050|c0_g1_i1	20
TR1706|c0_g1_i1	14
TR17091|c0_g1_i2	56
TR17091|c0_g1_i3	44
TR17091|c0_g1_i4	44
TR17092|c0_g1_i1	22
TR17151|c0_g1_i1	22
TR17152|c0_g1_i1	32
TR17198|c0_g2_i1	16
TR1726|c0_g2_i1	12
TR17284|c0_g1_i1	12
TR17353|c0_g1_i1	172
TR17366|c0_g1_i1	12
TR17414|c0_g1_i1	38
TR17420|c0_g1_i1	70
TR17454|c0_g1_i3	26
TR17465|c0_g1_i1	16
TR17500|c0_g1_i1	12
TR17652|c0_g1_i1	12
TR17670|c0_g1_i1	22
TR17681|c0_g1_i1	12
TR17771|c0_g1_i1	16
TR17792|c0_g1_i1	12
TR17873|c0_g2_i2	22
TR17940|c0_g1_i1	18
TR17973|c0_g1_i2	18
TR18007|c0_g1_i1	16
TR18028|c1_g2_i1	24
TR1803|c0_g1_i1	32
TR18109|c0_g3_i1	18
TR18156|c0_g1_i3	24
TR18158|c0_g1_i1	30
TR18252|c0_g1_i1	14
TR18289|c0_g1_i2	16
TR18303|c0_g1_i1	16
TR18315|c0_g1_i1	16
TR18488|c0_g1_i1	20
TR18490|c0_g2_i2	24
TR18581|c0_g3_i1	16
TR1860|c0_g1_i1	58
TR18613|c0_g2_i1	12
TR18638|c0_g1_i2	16
TR18689|c0_g1_i1	22
TR18713|c0_g1_i1	12
TR18770|c0_g1_i1	32
TR18790|c0_g2_i1	18
TR18798|c0_g1_i1	240
TR18864|c0_g1_i1	12
TR18875|c0_g2_i1	26
TR18892|c0_g2_i1	12
TR18943|c0_g1_i1	20
TR19012|c0_g2_i1	22
TR19022|c0_g1_i1	14
TR19043|c0_g1_i1	20
TR19053|c0_g1_i1	30
TR1907|c1_g1_i1	12
TR19106|c0_g1_i1	14
TR1912|c0_g2_i1	10
TR19162|c1_g1_i3	40
TR1929|c0_g1_i1	32
TR19295|c0_g1_i2	10
TR19354|c0_g1_i3	30
TR1936|c0_g1_i1	14
TR19436|c0_g1_i1	34
TR19462|c0_g2_i1	16
TR19465|c0_g1_i4	22
TR19575|c0_g1_i1	20
TR19631|c0_g1_i1	14
TR19646|c0_g1_i2	36
TR19681|c0_g1_i1	16
TR19702|c0_g2_i1	14
TR19714|c0_g1_i3	20
TR1972|c0_g1_i4	18
TR19720|c0_g1_i3	38
TR19723|c0_g1_i1	14
TR19743|c0_g1_i1	32
TR19767|c0_g1_i2	20
TR19774|c0_g1_i1	20
TR19790|c0_g1_i1	14
TR19814|c0_g1_i1	16
TR19853|c0_g1_i1	12
TR19925|c0_g1_i2	20
TR19954|c1_g1_i1	18
TR19968|c0_g1_i2	20
TR19997|c0_g2_i1	18
TR20012|c0_g1_i1	16
TR20017|c0_g2_i1	12
TR20052|c1_g1_i2	50
TR20052|c1_g1_i3	82
TR20079|c0_g1_i1	28
TR20103|c0_g1_i1	32
TR20110|c0_g1_i2	18
TR20110|c0_g1_i3	20
TR20119|c0_g1_i3	38
TR20136|c0_g2_i1	64
TR20142|c0_g1_i1	16
TR20183|c1_g2_i1	32
TR20204|c0_g1_i1	78
TR20242|c0_g1_i1	64
TR20261|c0_g2_i1	18
TR20272|c0_g1_i1	10
TR20273|c0_g1_i1	60
TR20299|c0_g1_i1	32
TR20307|c0_g1_i1	22
TR20326|c0_g5_i1	12
TR20334|c0_g1_i1	20
TR20336|c0_g1_i2	82
TR2034|c0_g2_i1	12
TR20345|c0_g1_i1	14
TR20361|c0_g1_i2	20
TR20454|c0_g1_i1	32
TR20469|c0_g2_i1	18
TR20503|c1_g1_i1	16
TR20524|c0_g1_i1	12
TR20525|c1_g1_i1	42
TR20543|c0_g1_i1	14
TR206|c0_g1_i1	26
TR20608|c0_g1_i2	30
TR20715|c0_g1_i1	12
TR20748|c0_g1_i1	18
TR20760|c0_g1_i1	16
TR20796|c0_g1_i4	16
TR20805|c0_g1_i1	32
TR20812|c2_g1_i1	1498
TR20875|c0_g2_i1	14
TR20876|c1_g1_i3	16
TR2088|c0_g1_i1	20
TR20883|c0_g3_i1	54
TR20883|c0_g3_i4	34
TR20889|c0_g1_i1	18
TR20896|c0_g1_i1	18
TR20944|c0_g1_i3	24
TR20947|c0_g1_i1	12
TR20966|c0_g1_i3	84
TR20969|c0_g1_i3	12
TR20987|c0_g1_i4	10
TR21027|c0_g1_i2	92
TR21041|c0_g2_i1	30
TR21041|c0_g3_i1	14
TR21087|c0_g2_i1	16
TR21116|c0_g1_i3	14
TR21139|c0_g1_i1	20
TR21156|c0_g3_i1	28
TR21161|c0_g1_i1	106
TR21161|c0_g2_i1	22
TR21166|c0_g1_i1	22
TR21202|c0_g1_i1	36
TR21225|c0_g1_i1	20
TR21247|c0_g2_i1	18
TR21271|c0_g1_i2	18
TR21335|c0_g1_i1	16
TR21387|c0_g1_i1	20
TR21399|c0_g1_i1	30
TR21527|c1_g1_i2	12
TR2161|c0_g1_i1	86
TR21629|c0_g1_i1	54
TR21629|c0_g1_i2	34
TR21634|c1_g1_i1	12
TR2164|c0_g1_i4	34
TR2165|c0_g2_i2	26
TR21689|c0_g1_i1	12
TR2172|c0_g1_i1	36
TR2172|c0_g2_i5	22
TR21728|c0_g1_i2	38
TR21732|c0_g2_i1	10
TR2176|c0_g1_i9	36
TR21766|c0_g2_i1	20
TR21767|c0_g1_i1	26
TR21799|c0_g1_i1	16
TR21809|c0_g1_i1	14
TR21819|c0_g1_i1	32
TR21842|c0_g1_i2	40
TR21847|c0_g1_i1	28
TR2185|c0_g1_i1	26
TR21864|c0_g1_i1	28
TR21866|c0_g2_i1	16
TR21874|c0_g2_i1	14
TR21879|c0_g3_i1	12
TR2190|c0_g1_i2	50
TR21903|c0_g1_i2	14
TR21904|c0_g1_i1	34
TR21926|c0_g1_i1	14
TR2193|c0_g2_i1	10
TR21933|c0_g1_i1	30
TR21936|c0_g1_i1	12
TR21938|c0_g2_i1	22
TR21940|c0_g1_i1	26
TR21941|c0_g1_i1	32
TR21967|c0_g1_i1	14
TR22022|c0_g1_i1	24
TR22061|c0_g1_i1	20
TR22077|c1_g2_i1	34
TR22132|c0_g2_i1	22
TR22137|c0_g1_i1	94
TR22178|c0_g2_i1	16
TR22189|c0_g1_i1	38
TR22219|c0_g3_i1	70
TR22247|c0_g1_i1	18
TR22252|c0_g1_i3	36
TR22257|c0_g1_i1	18
TR2227|c3_g3_i5	28
TR22271|c0_g1_i1	28
TR22296|c0_g1_i1	44
TR22296|c0_g1_i4	26
TR2233|c2_g1_i3	42
TR2233|c3_g1_i1	30
TR2233|c3_g3_i1	38
TR22360|c0_g1_i1	24
TR22361|c0_g1_i1	34
TR22395|c0_g1_i2	12
TR2240|c0_g1_i7	48
TR22406|c0_g1_i3	78
TR2241|c0_g1_i2	16
TR22437|c0_g2_i1	16
TR2244|c1_g1_i5	182
TR22444|c0_g1_i1	20
TR2249|c0_g2_i1	16
TR2250|c2_g2_i4	42
TR22505|c0_g1_i1	18
TR22534|c0_g1_i2	52
TR22544|c0_g1_i2	12
TR22553|c0_g1_i1	28
TR22648|c0_g1_i1	58
TR22662|c1_g3_i4	22
TR22722|c0_g3_i1	24
TR22730|c0_g1_i1	26
TR22753|c0_g3_i1	12
TR22764|c0_g1_i1	34
TR22768|c0_g1_i1	38
TR22783|c0_g1_i3	32
TR22806|c0_g1_i1	14
TR22811|c0_g1_i1	20
TR22816|c0_g1_i4	16
TR2282|c0_g2_i1	20
TR22821|c0_g1_i4	30
TR22834|c0_g1_i3	12
TR2284|c0_g1_i1	14
TR2284|c0_g4_i2	44
TR22842|c0_g1_i1	26
TR2289|c0_g1_i5	86
TR2289|c0_g1_i6	60
TR22902|c0_g1_i2	36
TR22932|c0_g1_i2	20
TR22939|c0_g2_i1	22
TR2294|c0_g6_i1	12
TR22955|c0_g1_i1	26
TR22962|c0_g1_i7	22
TR22963|c1_g1_i1	64
TR2297|c0_g4_i1	166
TR22991|c0_g1_i1	18
TR23023|c0_g1_i2	28
TR23072|c0_g1_i1	26
TR2311|c0_g1_i2	108
TR2311|c0_g3_i1	18
TR23129|c0_g1_i5	58
TR23129|c0_g3_i1	30
TR2316|c0_g1_i3	20
TR23169|c1_g1_i2	16
TR23171|c0_g1_i1	40
TR23205|c0_g1_i1	124
TR23230|c0_g1_i2	40
TR23233|c0_g1_i1	232
TR23244|c0_g1_i1	14
TR23254|c0_g5_i1	18
TR23255|c0_g1_i2	22
TR2326|c0_g1_i3	36
TR2327|c0_g3_i1	14
TR23281|c0_g1_i1	36
TR23325|c0_g1_i1	36
TR23342|c0_g1_i5	36
TR23345|c0_g1_i1	20
TR23364|c0_g1_i1	40
TR23368|c0_g1_i1	14
TR23375|c0_g1_i2	12
TR2339|c0_g1_i6	52
TR23394|c0_g1_i2	34
TR23414|c0_g1_i1	78
TR23430|c0_g1_i1	34
TR23466|c0_g1_i1	62
TR23472|c0_g1_i3	26
TR2349|c1_g1_i5	18
TR23535|c0_g2_i1	10
TR2354|c0_g1_i4	34
TR2355|c0_g1_i1	12
TR2355|c1_g2_i3	34
TR2355|c2_g1_i3	26
TR23563|c0_g1_i2	22
TR23575|c0_g1_i3	18
TR23587|c0_g1_i1	16
TR23617|c0_g1_i1	62
TR23643|c0_g1_i2	30
TR23643|c0_g1_i3	36
TR23660|c0_g2_i2	14
TR23685|c0_g1_i2	14
TR23707|c1_g1_i2	30
TR23733|c0_g1_i1	22
TR2374|c0_g2_i4	56
TR23764|c0_g1_i2	16
TR23792|c0_g1_i2	14
TR23838|c0_g1_i2	44
TR2384|c0_g2_i1	22
TR2384|c0_g3_i7	36
TR23870|c0_g1_i3	14
TR23882|c0_g1_i11	22
TR23882|c0_g1_i2	26
TR23882|c0_g1_i7	30
TR23883|c2_g5_i1	10
TR23896|c0_g1_i1	54
TR23902|c0_g1_i2	12
TR23918|c0_g1_i2	16
TR23947|c0_g3_i1	18
TR2395|c0_g1_i2	12
TR23952|c1_g1_i1	24
TR23974|c0_g1_i4	16
TR23977|c0_g1_i1	24
TR23992|c0_g1_i3	168
TR23992|c0_g1_i4	148
TR23999|c0_g2_i1	16
TR2400|c0_g1_i2	28
TR24012|c0_g1_i5	38
TR24053|c0_g1_i3	20
TR24060|c1_g2_i1	52
TR24105|c0_g1_i1	12
TR24153|c0_g2_i1	12
TR24178|c0_g1_i4	40
TR24195|c0_g1_i4	42
TR24208|c0_g1_i1	30
TR24216|c1_g1_i1	12
TR24219|c0_g1_i3	40
TR2422|c3_g3_i2	24
TR24222|c0_g1_i2	28
TR24250|c0_g1_i2	16
TR24257|c0_g1_i3	20
TR24284|c0_g1_i1	16
TR24298|c0_g3_i1	32
TR2432|c1_g2_i1	16
TR2432|c1_g2_i2	28
TR2432|c1_g2_i7	24
TR24353|c0_g1_i1	20
TR24374|c0_g1_i3	34
TR2439|c0_g2_i1	16
TR24404|c0_g1_i1	18
TR24412|c1_g2_i1	18
TR24425|c0_g1_i1	56
TR24453|c0_g1_i1	12
TR24501|c0_g1_i3	22
TR24533|c0_g1_i2	70
TR24542|c0_g1_i1	24
TR24549|c0_g1_i2	26
TR24566|c0_g1_i1	24
TR2457|c0_g2_i1	22
TR24574|c0_g1_i1	76
TR24575|c0_g1_i1	22
TR24583|c0_g1_i1	1602
TR24592|c0_g1_i1	34
TR24592|c0_g3_i1	30
TR2460|c0_g2_i1	40
TR2461|c1_g10_i2	14
TR24660|c2_g4_i1	14
TR24672|c0_g1_i2	18
TR24673|c0_g1_i1	16
TR24678|c1_g1_i1	228
TR24678|c2_g1_i1	26
TR24689|c0_g1_i1	40
TR24703|c0_g1_i1	22
TR24705|c2_g1_i1	12
TR24713|c0_g1_i2	82
TR2474|c0_g1_i1	32
TR2474|c0_g3_i2	24
TR2474|c0_g3_i3	16
TR24744|c0_g1_i1	24
TR24760|c0_g3_i1	24
TR24769|c0_g1_i2	98
TR2477|c0_g2_i2	18
TR24780|c0_g2_i2	16
TR24790|c0_g2_i2	24
TR24803|c0_g2_i4	32
TR24806|c0_g5_i1	12
TR24814|c1_g2_i1	26
TR24830|c0_g1_i3	60
TR24835|c0_g1_i1	14
TR24844|c0_g1_i1	20
TR24847|c0_g1_i1	16
TR24855|c0_g1_i2	16
TR24869|c0_g1_i5	18
TR24881|c0_g1_i3	18
TR24896|c0_g1_i1	16
TR24907|c1_g1_i3	30
TR24919|c0_g1_i1	14
TR24945|c1_g5_i1	18
TR2498|c0_g1_i2	14
TR24983|c0_g1_i4	38
TR24983|c0_g1_i6	42
TR2501|c1_g1_i2	18
TR25038|c1_g1_i2	24
TR25084|c0_g1_i5	14
TR25092|c0_g1_i3	382
TR25100|c0_g1_i1	48
TR25102|c1_g1_i3	30
TR25109|c0_g4_i1	30
TR25115|c0_g2_i1	26
TR2514|c1_g10_i2	60
TR25161|c0_g1_i1	20
TR25168|c0_g1_i2	20
TR25173|c0_g1_i1	34
TR25174|c0_g1_i1	40
TR25198|c0_g2_i1	18
TR25199|c0_g1_i1	14
TR25200|c0_g1_i2	46
TR2521|c0_g3_i1	22
TR25210|c0_g1_i1	28
TR25229|c0_g1_i2	20
TR25240|c0_g3_i1	16
TR25244|c0_g2_i1	14
TR25250|c0_g1_i1	20
TR25260|c0_g1_i1	20
TR25266|c0_g3_i1	74
TR2527|c0_g1_i1	34
TR25307|c0_g1_i2	26
TR25312|c0_g2_i1	16
TR25331|c0_g1_i3	16
TR25340|c0_g1_i1	34
TR25359|c0_g1_i2	32
TR2536|c0_g1_i3	42
TR2547|c0_g2_i6	132
TR25488|c1_g1_i1	36
TR25489|c0_g1_i2	24
TR25494|c1_g1_i3	56
TR2552|c1_g1_i1	82
TR2552|c1_g1_i6	52
TR25523|c0_g1_i1	30
TR25523|c0_g1_i3	20
TR25538|c0_g1_i1	86
TR25545|c0_g1_i4	52
TR25550|c0_g1_i8	26
TR25574|c0_g1_i1	22
TR25579|c0_g1_i3	46
TR25585|c0_g1_i1	36
TR25585|c0_g3_i1	18
TR25598|c0_g3_i1	16
TR2562|c0_g3_i3	28
TR25634|c0_g1_i1	28
TR2564|c0_g1_i9	14
TR25654|c0_g1_i1	24
TR25654|c0_g1_i2	32
TR25663|c0_g1_i4	22
TR25668|c1_g1_i2	90
TR2569|c0_g3_i2	20
TR25730|c0_g1_i1	54
TR25759|c0_g1_i1	20
TR25761|c0_g1_i1	48
TR25785|c0_g1_i5	46
TR25792|c0_g1_i2	46
TR25799|c0_g1_i2	64
TR2580|c0_g3_i9	26
TR25800|c0_g1_i1	14
TR25834|c0_g1_i1	20
TR25860|c0_g1_i4	20
TR2589|c0_g3_i2	14
TR25897|c0_g1_i1	14
TR25897|c0_g1_i2	16
TR2590|c0_g1_i4	78
TR2590|c0_g1_i9	34
TR25900|c0_g2_i1	24
TR25903|c1_g1_i4	20
TR25905|c0_g1_i1	22
TR25909|c0_g1_i1	46
TR2591|c0_g1_i1	16
TR2591|c1_g1_i2	64
TR25916|c0_g1_i4	16
TR25944|c0_g1_i2	36
TR25949|c0_g1_i3	30
TR25951|c0_g1_i1	20
TR25955|c0_g1_i2	18
TR25959|c0_g1_i3	54
TR25960|c0_g1_i2	24
TR25964|c1_g2_i1	20
TR25967|c0_g1_i1	18
TR2597|c0_g4_i2	20
TR25992|c0_g4_i1	36
TR25993|c0_g1_i3	42
TR25994|c0_g1_i2	28
TR26042|c0_g2_i3	14
TR2605|c0_g4_i1	24
TR26055|c0_g2_i1	42
TR26055|c0_g2_i2	38
TR26055|c0_g2_i3	52
TR26069|c0_g1_i4	28
TR26070|c0_g1_i2	20
TR26073|c0_g1_i1	56
TR26080|c0_g2_i2	20
TR26084|c0_g1_i2	44
TR2609|c1_g1_i1	28
TR26096|c0_g1_i1	12
TR26096|c0_g1_i3	32
TR2610|c0_g5_i1	28
TR26111|c0_g1_i1	32
TR26121|c0_g2_i2	22
TR26122|c0_g1_i3	78
TR2613|c0_g1_i1	14
TR2613|c0_g2_i1	48
TR2614|c0_g1_i6	32
TR26141|c0_g1_i1	18
TR2615|c1_g1_i1	44
TR26154|c0_g1_i5	46
TR26162|c0_g1_i1	16
TR26172|c1_g2_i2	42
TR2618|c0_g4_i1	12
TR26196|c0_g1_i1	18
TR26201|c0_g1_i1	52
TR26216|c0_g1_i1	14
TR26219|c0_g1_i1	24
TR26242|c0_g1_i1	32
TR26245|c0_g1_i12	32
TR26248|c0_g1_i2	30
TR2626|c0_g1_i1	36
TR26275|c1_g1_i9	42
TR26312|c0_g1_i3	18
TR26318|c1_g1_i1	52
TR26333|c0_g1_i3	32
TR26342|c0_g1_i1	18
TR26345|c1_g1_i1	12
TR2635|c0_g1_i1	68
TR2635|c1_g1_i1	110
TR26355|c0_g1_i4	28
TR26358|c0_g2_i2	18
TR2636|c0_g1_i1	16
TR26361|c1_g1_i3	50
TR26362|c1_g2_i1	24
TR26391|c0_g1_i2	16
TR26404|c0_g1_i5	28
TR26409|c0_g1_i1	24
TR26414|c0_g2_i1	12
TR26430|c0_g1_i2	14
TR26450|c0_g1_i1	144
TR26450|c0_g1_i2	172
TR26456|c0_g4_i2	14
TR2652|c2_g2_i14	34
TR26533|c0_g1_i1	22
TR26535|c0_g2_i2	148
TR26535|c0_g2_i3	138
TR26535|c0_g2_i6	124
TR2654|c0_g1_i1	108
TR2654|c0_g1_i3	98
TR26555|c0_g1_i3	16
TR26608|c0_g1_i2	34
TR26609|c0_g1_i1	20
TR26626|c0_g2_i1	20
TR26628|c0_g1_i5	74
TR2665|c0_g1_i1	56
TR26656|c0_g1_i2	14
TR26662|c5_g3_i1	44
TR26668|c0_g1_i5	24
TR26678|c0_g3_i1	20
TR26686|c0_g2_i3	32
TR26688|c0_g3_i3	28
TR2669|c1_g1_i7	46
TR2669|c2_g5_i2	36
TR2669|c2_g8_i3	68
TR26693|c0_g1_i1	38
TR26724|c1_g1_i1	90
TR26736|c0_g1_i2	20
TR26758|c1_g2_i1	24
TR26758|c1_g4_i1	24
TR26761|c0_g2_i2	22
TR26763|c0_g2_i1	60
TR26774|c0_g3_i1	16
TR26802|c0_g1_i2	42
TR26806|c0_g2_i2	20
TR26806|c0_g2_i7	24
TR2681|c0_g1_i7	32
TR26819|c0_g1_i1	48
TR2682|c0_g1_i1	28
TR2682|c0_g1_i2	102
TR26832|c1_g1_i1	56
TR26832|c2_g1_i1	38
TR26832|c2_g1_i2	44
TR2685|c0_g1_i5	52
TR2686|c3_g1_i5	66
TR26873|c1_g1_i1	20
TR26879|c0_g1_i1	30
TR26886|c0_g1_i1	22
TR26890|c0_g1_i1	354
TR26890|c0_g1_i2	230
TR26890|c0_g1_i5	14
TR26890|c0_g1_i8	48
TR26890|c0_g1_i9	338
TR2691|c1_g2_i5	24
TR2691|c1_g2_i6	22
TR2694|c1_g2_i6	20
TR26945|c0_g1_i1	36
TR26945|c0_g1_i2	48
TR26945|c0_g1_i4	76
TR2696|c0_g1_i4	16
TR26962|c0_g1_i1	58
TR26978|c0_g1_i1	16
TR2700|c1_g1_i7	34
TR27009|c0_g3_i3	22
TR27026|c2_g2_i3	22
TR27030|c0_g1_i1	16
TR27040|c0_g1_i3	90
TR2705|c0_g1_i1	44
TR27053|c0_g1_i2	24
TR27055|c0_g1_i1	78
TR27065|c0_g2_i2	48
TR2707|c0_g3_i2	50
TR27072|c0_g1_i2	40
TR27076|c0_g1_i2	30
TR27078|c0_g2_i4	22
TR27093|c0_g5_i2	14
TR27098|c0_g1_i2	32
TR2711|c1_g3_i7	38
TR27129|c2_g1_i1	50
TR2713|c0_g2_i2	20
TR27140|c0_g1_i1	36
TR27141|c0_g3_i2	20
TR27146|c0_g2_i1	24
TR27151|c0_g1_i1	34
TR27157|c0_g1_i1	12
TR27169|c0_g1_i2	20
TR27173|c0_g1_i1	14
TR27174|c0_g1_i3	54
TR27188|c0_g3_i1	34
TR27234|c0_g1_i1	14
TR27243|c0_g1_i3	70
TR27243|c0_g1_i5	66
TR2726|c0_g1_i1	74
TR27265|c1_g4_i1	18
TR27276|c0_g1_i1	144
TR27296|c0_g1_i1	12
TR27297|c2_g5_i2	20
TR27298|c0_g2_i1	120
TR27311|c0_g1_i1	36
TR27322|c0_g1_i3	30
TR27324|c0_g4_i2	22
TR27328|c1_g1_i2	90
TR27328|c1_g1_i3	64
TR27335|c1_g1_i2	12
TR27335|c1_g1_i5	40
TR27336|c0_g3_i1	16
TR27344|c0_g1_i1	78
TR27347|c0_g3_i1	24
TR27360|c0_g1_i2	38
TR2740|c1_g1_i1	34
TR27417|c0_g2_i1	40
TR27470|c0_g2_i1	22
TR27472|c0_g1_i4	26
TR2748|c0_g1_i2	26
TR2753|c1_g6_i2	1314
TR2753|c3_g1_i1	70
TR27533|c0_g1_i4	10
TR27533|c0_g3_i4	24
TR2754|c0_g4_i11	22
TR2755|c1_g2_i1	32
TR27556|c0_g1_i2	32
TR27564|c0_g1_i5	12
TR27568|c1_g1_i3	20
TR27586|c3_g1_i7	36
TR27586|c3_g1_i9	22
TR27596|c0_g1_i1	66
TR27598|c0_g1_i1	32
TR27598|c0_g1_i3	30
TR27599|c0_g2_i1	16
TR2762|c1_g2_i1	32
TR2762|c2_g1_i1	14
TR27627|c1_g2_i1	26
TR27630|c0_g1_i3	42
TR27641|c1_g1_i3	50
TR2766|c0_g1_i4	36
TR2767|c0_g1_i1	70
TR2767|c0_g1_i3	46
TR27687|c0_g1_i1	22
TR27696|c1_g1_i3	48
TR2771|c0_g1_i2	32
TR27718|c0_g2_i5	22
TR27728|c0_g1_i1	28
TR27737|c0_g1_i2	30
TR27747|c0_g1_i4	16
TR27804|c0_g1_i4	46
TR27804|c0_g1_i7	36
TR27824|c4_g8_i1	166
TR27835|c0_g2_i1	32
TR2784|c0_g2_i1	14
TR27852|c0_g1_i2	48
TR27853|c0_g1_i3	24
TR27854|c0_g2_i2	44
TR27856|c0_g1_i2	60
TR27881|c0_g1_i1	28
TR2789|c1_g2_i3	16
TR27891|c1_g1_i3	18
TR27891|c1_g3_i1	18
TR27899|c0_g1_i2	18
TR27927|c0_g1_i2	54
TR27927|c0_g1_i5	56
TR27929|c0_g1_i3	14
TR2793|c0_g4_i9	2596
TR2794|c0_g1_i2	24
TR27943|c0_g1_i3	12
TR27992|c0_g1_i1	56
TR2801|c1_g2_i3	54
TR28027|c1_g1_i8	28
TR28052|c1_g2_i1	26
TR2808|c0_g1_i10	34
TR28092|c0_g1_i2	44
TR28105|c0_g3_i1	32
TR28112|c0_g1_i1	36
TR2812|c1_g1_i5	84
TR28126|c2_g1_i3	46
TR28128|c0_g1_i7	32
TR28133|c0_g2_i1	10
TR28148|c0_g1_i1	38
TR28163|c0_g1_i2	32
TR28167|c0_g1_i2	18
TR28184|c0_g1_i4	24
TR2820|c1_g1_i2	16
TR2821|c0_g1_i1	82
TR28217|c0_g1_i1	26
TR28235|c0_g1_i2	66
TR28246|c0_g1_i2	26
TR28250|c0_g1_i3	34
TR28250|c0_g1_i5	38
TR28266|c0_g1_i5	12
TR28266|c0_g1_i6	22
TR28294|c0_g1_i1	32
TR28301|c0_g1_i1	20
TR28305|c0_g1_i4	24
TR28319|c0_g1_i3	16
TR28321|c0_g1_i2	12
TR28321|c0_g2_i3	28
TR28324|c0_g1_i2	32
TR28338|c0_g1_i3	14
TR28347|c0_g2_i1	352
TR28365|c0_g1_i4	68
TR28375|c0_g1_i5	26
TR28377|c0_g1_i1	20
TR28379|c0_g1_i2	52
TR28385|c0_g1_i8	18
TR28391|c0_g1_i1	64
TR28404|c0_g2_i1	18
TR28412|c0_g1_i1	48
TR28412|c3_g1_i2	82
TR28412|c3_g1_i4	20
TR28412|c3_g1_i7	42
TR28421|c0_g1_i4	32
TR28437|c0_g1_i1	188
TR28445|c0_g1_i1	16
TR28466|c1_g1_i1	68
TR2848|c0_g2_i5	22
TR2850|c1_g1_i1	22
TR28523|c1_g1_i11	18
TR28530|c1_g1_i1	18
TR28530|c1_g1_i2	44
TR28530|c1_g3_i1	16
TR28537|c0_g1_i2	20
TR28556|c0_g1_i6	80
TR2856|c0_g1_i2	20
TR2856|c0_g2_i6	20
TR2856|c0_g4_i1	22
TR28598|c0_g2_i1	34
TR28600|c0_g7_i2	18
TR28609|c0_g2_i1	22
TR28610|c0_g1_i1	30
TR28619|c0_g5_i1	28
TR28621|c0_g3_i1	36
TR28622|c0_g1_i2	16
TR28622|c1_g2_i1	12
TR28623|c0_g1_i4	14
TR28623|c0_g1_i5	34
TR28624|c2_g2_i1	46
TR28624|c2_g2_i3	64
TR28631|c0_g1_i2	100
TR28634|c0_g1_i5	24
TR28642|c0_g1_i2	54
TR28650|c0_g1_i4	36
TR28658|c0_g1_i1	16
TR28661|c0_g1_i1	56
TR28664|c2_g1_i2	30
TR28687|c1_g1_i1	22
TR28713|c0_g3_i2	22
TR28735|c0_g2_i1	26
TR28752|c0_g1_i1	44
TR28753|c0_g1_i3	32
TR28755|c2_g1_i1	24
TR28755|c2_g1_i5	34
TR2876|c0_g2_i1	48
TR2876|c1_g2_i3	106
TR2876|c1_g2_i5	38
TR28766|c0_g1_i4	44
TR2877|c0_g3_i7	34
TR28807|c0_g2_i3	24
TR28832|c0_g1_i4	50
TR28841|c0_g1_i3	66
TR28852|c0_g1_i3	30
TR28856|c0_g1_i3	36
TR28856|c0_g1_i5	56
TR28860|c0_g1_i4	38
TR28860|c0_g1_i7	26
TR28864|c0_g1_i2	10
TR28880|c0_g3_i4	18
TR28909|c2_g2_i1	34
TR28909|c2_g2_i2	38
TR28916|c0_g1_i1	46
TR28921|c0_g2_i1	26
TR28922|c0_g1_i1	172
TR28928|c4_g8_i3	12
TR28929|c1_g1_i1	16
TR28932|c0_g4_i1	66
TR28932|c0_g4_i4	46
TR2896|c1_g1_i6	58
TR28966|c0_g5_i1	20
TR28974|c0_g1_i1	56
TR2898|c0_g3_i3	20
TR28985|c2_g3_i1	44
TR28986|c0_g1_i2	20
TR2899|c3_g4_i1	14
TR29000|c0_g2_i9	20
TR29010|c0_g2_i1	24
TR29017|c1_g1_i2	26
TR29020|c0_g1_i2	30
TR29039|c1_g1_i1	58
TR29070|c1_g1_i1	58
TR29074|c0_g1_i11	32
TR29074|c0_g1_i9	22
TR29076|c0_g1_i2	24
TR29080|c0_g1_i1	44
TR29081|c2_g1_i1	14
TR29081|c2_g3_i4	16
TR29082|c0_g3_i1	12
TR29082|c0_g3_i2	34
TR29088|c0_g1_i2	26
TR29091|c0_g1_i1	20
TR29102|c0_g1_i4	26
TR29106|c0_g1_i6	22
TR29114|c0_g1_i6	16
TR29126|c0_g1_i2	28
TR29139|c3_g2_i1	16
TR29168|c0_g1_i1	34
TR29183|c0_g6_i1	40
TR29183|c0_g6_i2	22
TR29212|c0_g7_i1	10
TR29219|c0_g1_i5	32
TR29222|c0_g1_i1	16
TR29224|c0_g8_i1	28
TR2923|c0_g3_i1	26
TR29243|c0_g2_i3	22
TR29246|c0_g1_i1	74
TR29284|c0_g1_i6	60
TR29297|c7_g1_i1	24
TR29297|c9_g3_i2	62
TR29297|c9_g3_i6	82
TR29309|c0_g3_i7	20
TR29310|c1_g1_i1	40
TR29328|c0_g1_i3	32
TR29329|c0_g4_i1	28
TR29335|c0_g1_i1	28
TR29335|c0_g2_i4	30
TR29338|c1_g1_i2	20
TR29338|c3_g1_i1	46
TR29338|c3_g1_i5	58
TR29338|c3_g1_i6	28
TR29338|c3_g4_i1	14
TR2934|c0_g1_i2	36
TR29341|c0_g1_i1	92
TR29341|c0_g1_i4	46
TR29365|c0_g1_i1	36
TR29365|c0_g1_i3	76
TR29376|c0_g1_i3	52
TR29381|c1_g2_i7	48
TR29381|c1_g2_i8	48
TR2939|c1_g1_i1	94
TR2939|c1_g1_i2	108
TR2939|c1_g1_i3	92
TR2939|c1_g1_i4	92
TR29392|c0_g1_i1	20
TR29399|c0_g1_i1	26
TR29472|c0_g1_i1	18
TR29482|c0_g1_i4	34
TR29491|c0_g2_i1	20
TR29491|c1_g1_i4	50
TR29491|c1_g1_i5	24
TR29493|c1_g1_i1	42
TR29499|c0_g2_i9	70
TR29506|c0_g2_i1	28
TR29508|c1_g1_i1	28
TR29518|c0_g1_i4	28
TR29524|c3_g1_i1	18
TR2953|c0_g2_i2	48
TR2953|c0_g5_i1	18
TR29554|c1_g2_i1	44
TR29555|c0_g2_i3	30
TR29565|c0_g2_i2	28
TR29574|c0_g1_i3	48
TR29574|c0_g3_i1	16
TR29577|c0_g3_i6	64
TR29582|c0_g5_i1	42
TR29584|c1_g1_i2	40
TR29587|c0_g1_i3	34
TR2960|c1_g2_i1	38
TR29606|c0_g1_i1	16
TR29608|c0_g2_i5	42
TR29620|c0_g1_i3	40
TR29623|c1_g1_i1	14
TR29629|c1_g5_i2	18
TR29634|c0_g1_i1	28
TR29653|c0_g1_i2	12
TR2966|c6_g5_i4	16
TR2966|c6_g5_i6	22
TR29661|c4_g3_i1	18
TR29662|c0_g1_i1	74
TR2967|c0_g2_i1	16
TR29693|c0_g4_i1	18
TR29694|c0_g2_i5	14
TR29694|c0_g3_i2	20
TR29696|c0_g1_i2	24
TR29706|c0_g1_i1	26
TR29709|c0_g1_i1	26
TR29729|c1_g1_i1	14
TR29778|c0_g2_i1	14
TR29780|c0_g1_i4	52
TR29782|c0_g1_i2	36
TR29788|c0_g1_i1	40
TR29793|c0_g2_i1	34
TR29810|c0_g1_i3	20
TR29816|c0_g1_i3	28
TR29820|c0_g1_i2	34
TR29836|c0_g1_i13	38
TR29841|c0_g1_i1	10
TR29841|c0_g1_i3	30
TR29844|c0_g1_i2	16
TR29851|c0_g1_i5	28
TR2986|c0_g1_i5	20
TR29862|c0_g4_i1	16
TR29863|c0_g1_i4	30
TR29871|c0_g2_i1	94
TR29878|c0_g1_i1	58
TR29883|c0_g1_i1	16
TR29888|c0_g3_i5	14
TR29893|c0_g1_i3	10
TR29895|c0_g1_i2	42
TR29909|c2_g6_i1	12
TR29920|c0_g3_i1	12
TR2994|c0_g3_i3	72
TR29962|c0_g1_i3	80
TR29983|c0_g1_i2	54
TR29983|c0_g1_i6	30
[truncated: 6,331 more rows]

## Sheet: F1_vs_AMPHID2_Differential
Transcript ID	baseMeanA( AMPHID2 )	baseMeanB( F1 )	log2FoldChange( F1 Vs. AMPHID2 )	pval	padj	Significant	Hit Description	Hit Organism	Family	Gene Ontology (Biological Process)	Gene Ontology (Molecular Function)	Gene Ontology (Cellular Component)	Pathway
TR43738|c0_g2_i1	11.7377	53.1619	2.17924	0.0002388	0.0727937	No	hypothetical protein M569_16429, partial	Genlisea aurea	NA	protein import[GO:0017038] ; protein targeting[GO:0006605]	ATP binding[GO:0005524]	intracellular[GO:0005622] ; membrane[GO:0016020]	NA
TR35502|c1_g4_i1	13.694	61.3406	2.1633	0.000191116	0.063324	No	PREDICTED: caffeoylshikimate esterase-like	Sesamum indicum	NA	NA	NA	NA	NA
TR27409|c1_g1_i3	11.7377	51.1172	2.12265	0.000339458	0.090593	No	PREDICTED: coatomer subunit alpha-1	Populus euphratica	NA	NA	NA	NA	NA
TR7647|c1_g1_i9	19.5629	79.7428	2.02723	0.000175886	0.0594261	No	PREDICTED: probable LRR receptor-like serine/threonine-protein kinase At3g47570 isoform X1	Sesamum indicum	NA	NA	NA	NA	NA
TR26629|c2_g1_i3	19.5629	79.7428	2.02723	0.000175886	0.0597203	No	NA	NA	NA	NA	NA	NA	NA
TR35491|c0_g1_i1	9.78145	38.8491	1.98976	0.000702566	0.148267	No	NA	NA	NA	NA	NA	NA	NA
TR8210|c0_g2_i1	17.6066	69.5194	1.9813	0.000359019	0.0918807	No	PREDICTED: GATA transcription factor 26-like	Solanum tuberosum	NA	NA	NA	NA	NA
TR28895|c0_g4_i1	13.694	53.1619	1.95685	0.000768607	0.158784	No	NA	NA	NA	NA	NA	NA	NA
TR7473|c0_g1_i6	21.5192	81.7875	1.92626	0.000294783	0.0821881	No	PREDICTED: MYB-like transcription factor ETC3	Sesamum indicum	NA	NA	NA	NA	NA
TR43658|c1_g2_i3	13.694	51.1172	1.90026	0.00108446	0.197819	No	NA	NA	NA	NA	NA	NA	NA
TR41624|c0_g3_i3	27.388	100.19	1.87112	0.000213235	0.067709	No	NA	NA	NA	NA	NA	NA	NA
TR31797|c0_g2_i1	23.4755	85.8769	1.87112	0.000353524	0.0911547	No	hypothetical protein MIMGU_mgv1a013195mg	Mimulus guttatus	NA	NA	NA	integral component of membrane[GO:0016021]	NA
TR36633|c0_g5_i7	15.6503	57.2512	1.87112	0.00105593	0.198419	No	unknown	Medicago truncatula	NA	NA	DNA binding[GO:0003677]	NA	NA
TR31817|c1_g7_i1	11.7377	42.9384	1.87112	0.00137139	0.235739	No	unnamed protein product	Vitis vinifera	NA	NA	NA	NA	NA
TR38704|c1_g5_i2	13.694	49.0725	1.84137	0.00152782	0.25069	No	hypothetical protein MIMGU_mgv1a006920mg	Mimulus guttatus	NA	protein folding[GO:0006457]	unfolded protein binding[GO:0051082] ; calcium ion binding[GO:0005509]	endoplasmic reticulum[GO:0005783]	NA
TR38714|c0_g1_i1	9.78145	34.7597	1.8293	0.0014712	0.246111	No	NA	NA	NA	NA	NA	NA	NA
TR8150|c2_g5_i1	15.6503	55.2066	1.81865	0.00147681	0.24585	No	NA	NA	NA	NA	NA	NA	NA
TR35420|c1_g3_i1	17.6066	61.3406	1.80073	0.00131866	0.230134	No	NA	NA	NA	NA	NA	NA	NA
TR40863|c0_g1_i6	11.7377	40.8937	1.80073	0.00195792	0.295789	No	quercetin 3-O-glucoside-6''-O-malonyltransferase	Glandularia x hybrida	NA	NA	NA	NA	NA
TR3091|c0_g2_i3	19.5629	67.4747	1.78623	0.00113371	0.204626	No	NA	NA	NA	NA	NA	NA	NA
TR35873|c0_g2_i2	19.5629	67.4747	1.78623	0.00113371	0.204089	No	PREDICTED: zinc finger protein CONSTANS-LIKE 5-like	Sesamum indicum	NA	NA	NA	NA	NA
TR36275|c3_g3_i2	33.2569	114.502	1.78365	0.000235845	0.0735268	No	PREDICTED: uncharacterized protein LOC105156632	Sesamum indicum	NA	NA	NA	NA	NA
TR37650|c1_g1_i1	33.2569	114.502	1.78365	0.000235845	0.0731941	No	hypothetical protein F775_05472	Aegilops tauschii	NA	NA	NA	membrane[GO:0016020]	NA
TR38392|c0_g7_i1	27.388	94.0556	1.77997	0.000467015	0.111219	No	hypothetical protein B456_002G028900	Gossypium raimondii	NA	NA	NA	NA	NA
TR3099|c0_g1_i2	21.5192	73.6087	1.77425	0.000962391	0.185937	No	PREDICTED: protein GAST1-like	Sesamum indicum	NA	NA	NA	NA	NA
TR41319|c1_g2_i4	29.3443	100.19	1.77158	0.000402859	0.0990354	No	PREDICTED: probable indole-3-acetic acid-amido synthetase GH3.5 isoform X1	Populus euphratica	NA	NA	NA	NA	NA
TR40823|c0_g1_i1	37.1695	126.771	1.77003	0.000179056	0.0602006	No	hypothetical protein CICLE_v10011765mg	Citrus clementina	NA	NA	NA	membrane[GO:0016020]	NA
TR20330|c0_g2_i1	15.6503	53.1619	1.7642	0.00206298	0.308265	No	NA	NA	NA	NA	NA	NA	NA
TR35365|c0_g2_i1	15.6503	53.1619	1.7642	0.00206298	0.308938	No	Tam3-transposase	Antirrhinum majus	NA	NA	binding[GO:0005488]	NA	NA
TR34864|c0_g1_i3	25.4318	85.8769	1.75564	0.000705972	0.148529	No	PREDICTED: jasmonate O-methyltransferase	Sesamum indicum	NA	NA	NA	NA	NA
TR31817|c1_g10_i1	9.78145	32.715	1.74183	0.00218523	0.31889	No	unnamed protein product	Vitis vinifera	NA	NA	binding[GO:0005488]	NA	NA
TR8150|c2_g11_i1	41.0821	136.994	1.73753	0.000170549	0.0599869	No	PREDICTED: SPX domain-containing membrane protein At4g22990-like isoform X1	Nicotiana sylvestris	NA	NA	NA	NA	NA
TR3915|c1_g1_i2	13.694	44.9831	1.71584	0.00302136	0.388064	No	NA	NA	NA	NA	NA	NA	NA
TR48039|c0_g1_i1	29.3443	96.1003	1.71146	0.000667508	0.142624	No	hypothetical protein MIMGU_mgv1a014264mg	Mimulus guttatus	NA	carbohydrate metabolic process[GO:0005975]	hydrolase activity, hydrolyzing O-glycosyl compounds[GO:0004553]	NA	NA
TR10267|c0_g1_i1	15.6503	51.1172	1.70762	0.00287824	0.376019	No	NA	NA	NA	NA	NA	NA	NA
TR32412|c3_g2_i5	15.6503	51.1172	1.70762	0.00287824	0.376737	No	NA	NA	NA	NA	NA	NA	NA
TR36096|c0_g3_i4	43.0384	139.039	1.69179	0.000226139	0.0708228	No	PREDICTED: IAA-amino acid hydrolase ILR1-like 2	Sesamum indicum	NA	NA	NA	NA	NA
TR30583|c0_g1_i2	23.4755	75.6534	1.68825	0.00144368	0.243287	No	PREDICTED: multiprotein-bridging factor 1a-like	Vitis vinifera	NA	NA	DNA binding[GO:0003677]	NA	NA
TR38207|c0_g4_i1	48.9072	157.441	1.68669	0.000152992	0.0558152	No	hypothetical protein MIMGU_mgv1a010087mg	Mimulus guttatus	NA	NA	NA	NA	NA
TR33176|c0_g2_i5	27.388	87.9216	1.68267	0.00101995	0.193781	No	NA	NA	NA	NA	NA	NA	NA
TR36718|c0_g1_i3	27.388	87.9216	1.68267	0.00101995	0.194319	No	PREDICTED: uncharacterized protein LOC105165554	Sesamum indicum	NA	NA	NA	NA	NA
TR2593|c1_g2_i1	29.3443	94.0556	1.68043	0.000858745	0.171217	No	PREDICTED: fasciclin-like arabinogalactan protein 13	Sesamum indicum	NA	NA	NA	NA	NA
TR44738|c6_g8_i1	35.2132	112.458	1.6752	0.000516158	0.1184	No	unnamed protein product, partial	Coffea canephora	NA	NA	NA	NA	NA
TR33934|c1_g1_i1	46.9509	149.262	1.66862	0.000211111	0.0676611	No	PREDICTED: probable xyloglucan endotransglucosylase/hydrolase protein 7	Sesamum indicum	NA	NA	NA	NA	NA
TR32035|c0_g3_i4	54.7761	171.754	1.64872	0.000150707	0.0552756	No	alcohol acetyltransferase	Lavandula x intermedia	NA	NA	transferase activity[GO:0016740]	NA	NA
TR33962|c0_g1_i12	43.0384	134.949	1.64872	0.000341065	0.090319	No	PREDICTED: putative glutamine amidotransferase YLR126C	Sesamum indicum	NA	NA	NA	NA	NA
TR32264|c1_g1_i4	43.0384	134.949	1.64872	0.000341065	0.0906691	No	hypothetical protein Csa_3G881780	Cucumis sativus	NA	NA	NA	NA	NA
TR18401|c0_g2_i1	25.4318	79.7428	1.64872	0.00158213	0.257751	No	alcohol acetyltransferase	Lavandula x intermedia	NA	NA	NA	NA	NA
TR32277|c1_g5_i1	21.5192	67.4747	1.64872	0.00235091	0.334527	No	PREDICTED: auxin-induced protein AUX22-like	Nicotiana sylvestris	NA	NA	NA	NA	NA
TR39326|c0_g2_i3	21.5192	67.4747	1.64872	0.00235091	0.333835	No	hypothetical protein MIMGU_mgv1a008230mg	Mimulus guttatus	NA	MAPK cascade[GO:0000165]	MAP kinase activity[GO:0004707] ; ATP binding[GO:0005524]	intracellular[GO:0005622]	map04150:mTOR signaling pathway(protein kinase[ec:2.7.11.24])
TR38084|c1_g6_i1	9.78145	30.6703	1.64872	0.00329798	0.398237	No	hypothetical protein MIMGU_mgv1a013555mg	Mimulus guttatus	NA	regulation of transcription, DNA-templated[GO:0006355] ; transcription, DNA-templated[GO:0006351]	transcription factor activity, sequence-specific DNA binding[GO:0003700] ; DNA binding[GO:0003677] ; protein dimerization activity[GO:0046983]	nucleus[GO:0005634]	NA
TR23098|c0_g1_i2	17.6066	55.2066	1.64872	0.00347415	0.417306	No	PREDICTED: uncharacterized protein LOC105162031	Sesamum indicum	NA	NA	NA	NA	NA
TR42502|c1_g1_i1	17.6066	55.2066	1.64872	0.00347415	0.416576	No	lipoxygenase 6	Actinidia deliciosa	NA	oxidation-reduction process[GO:0055114]	metal ion binding[GO:0046872] ; oxidoreductase activity, acting on single donors with incorporation of molecular oxygen, incorporation of two atoms of oxygen[GO:0016702]	NA	NA
TR35598|c0_g3_i4	15.6503	49.0725	1.64872	0.00401083	0.443695	No	PREDICTED: proteasome subunit beta type-2-B	Sesamum indicum	NA	NA	NA	NA	NA
TR43394|c1_g5_i1	11.7377	36.8044	1.64872	0.00406996	0.44735	No	NA	NA	NA	NA	NA	NA	NA
TR3554|c0_g2_i1	13.694	42.9384	1.64872	0.00425529	0.4618	No	PREDICTED: probable receptor-like protein kinase At5g24010	Sesamum indicum	NA	NA	NA	NA	NA
TR32904|c0_g4_i1	13.694	42.9384	1.64872	0.00425529	0.462532	No	PREDICTED: translation initiation factor IF-2, chloroplastic-like	Camelina sativa	NA	NA	NA	NA	NA
TR32035|c0_g3_i1	54.7761	169.709	1.63145	0.000180334	0.0600416	No	alcohol acetyltransferase	Lavandula x intermedia	NA	NA	transferase activity[GO:0016740]	NA	NA
TR31817|c1_g8_i1	48.9072	151.307	1.62936	0.000270935	0.0777515	No	hypothetical protein B456_009G169200	Gossypium raimondii	NA	NA	NA	NA	NA
TR36096|c0_g3_i6	25.4318	77.6981	1.61125	0.0020727	0.309044	No	PREDICTED: IAA-amino acid hydrolase ILR1-like 2	Sesamum indicum	NA	NA	NA	NA	NA
TR39556|c0_g2_i1	23.4755	71.5641	1.60808	0.00254801	0.353052	No	PREDICTED: protein ENHANCED DISEASE RESISTANCE 2-like	Sesamum indicum	NA	NA	NA	NA	NA
TR16551|c0_g1_i1	21.5192	65.43	1.60433	0.0031651	0.389041	No	PREDICTED: casein kinase II subunit alpha, chloroplastic	Malus domestica	NA	NA	NA	NA	NA
TR23431|c0_g1_i1	21.5192	65.43	1.60433	0.0031651	0.388345	No	expansin	Breonia chinensis	NA	plant-type cell wall organization[GO:0009664]	NA	extracellular region[GO:0005576] ; cell wall[GO:0005618] ; membrane[GO:0016020]	NA
TR25717|c0_g1_i1	21.5192	65.43	1.60433	0.0031651	0.390441	No	hypothetical protein MIMGU_mgv1a003590mg	Mimulus guttatus	NA	organic substance metabolic process[GO:0071704] ; primary metabolic process[GO:0044238] ; single-organism cellular process[GO:0044763] ; single-organism metabolic process[GO:0044710] ; cellular metabolic process[GO:0044237]	oxidoreductase activity, acting on the CH-OH group of donors, NAD or NADP as acceptor[GO:0016616] ; coenzyme binding[GO:0050662]	membrane part[GO:0044425] ; endoplasmic reticulum[GO:0005783]	NA
TR7291|c0_g1_i1	21.5192	65.43	1.60433	0.0031651	0.38974	No	NA	NA	NA	NA	NA	NA	NA
TR43260|c1_g2_i4	39.1258	118.592	1.59981	0.000718407	0.149767	No	NA	NA	NA	NA	NA	NA	NA
TR34425|c0_g1_i3	19.5629	59.2959	1.59981	0.00392771	0.441623	No	PREDICTED: alcohol dehydrogenase 1B	Sesamum indicum	NA	NA	NA	NA	NA
TR20081|c0_g1_i1	52.8198	159.486	1.59428	0.000296971	0.0821304	No	PREDICTED: benzyl alcohol O-benzoyltransferase-like	Sesamum indicum	NA	NA	NA	NA	NA
TR30192|c0_g1_i2	50.8635	153.352	1.59214	0.000342589	0.0900274	No	NA	NA	NA	NA	NA	NA	NA
TR7665|c0_g1_i2	66.5138	200.379	1.59101	0.000139407	0.0522487	No	PREDICTED: uncharacterized protein LOC105174263	Sesamum indicum	NA	NA	NA	NA	NA
TR7793|c1_g4_i4	46.9509	141.083	1.58732	0.000459337	0.109772	No	PREDICTED: uncharacterized protein LOC105158789	Sesamum indicum	NA	NA	NA	NA	NA
TR37602|c0_g1_i1	31.3006	94.0556	1.58732	0.00150105	0.247482	No	NA	NA	NA	NA	NA	NA	NA
TR13462|c0_g1_i2	15.6503	47.0278	1.58732	0.00558296	0.52671	No	hypothetical protein POPTR_0006s11720g	Populus trichocarpa	NA	base-excision repair[GO:0006284]	catalytic activity[GO:0003824] ; 4 iron, 4 sulfur cluster binding[GO:0051539]	NA	NA
TR2812|c1_g1_i12	15.6503	47.0278	1.58732	0.00558296	0.525265	No	PREDICTED: probable LRR receptor-like serine/threonine-protein kinase At3g47570	Erythranthe guttatus	NA	NA	NA	NA	NA
TR35118|c0_g2_i1	15.6503	47.0278	1.58732	0.00558296	0.525987	No	PREDICTED: L-ascorbate oxidase homolog	Erythranthe guttatus	NA	NA	NA	NA	NA
TR31734|c0_g1_i3	15.6503	47.0278	1.58732	0.00558296	0.524546	No	PREDICTED: lactoylglutathione lyase	Nicotiana sylvestris	NA	NA	NA	NA	NA
TR31889|c0_g1_i1	54.7761	163.575	1.57833	0.000308554	0.0843139	No	putative galactinol synthase family protein	Populus trichocarpa	NA	metabolic process[GO:0008152]	transferase activity, transferring glycosyl groups[GO:0016757]	NA	NA
TR42166|c2_g2_i1	13.694	40.8937	1.57833	0.00601546	0.537917	No	PREDICTED: probable receptor-like protein kinase At1g67000-like, partial	Solanum tuberosum	NA	NA	NA	NA	NA
TR35680|c1_g2_i6	25.4318	75.6534	1.57277	0.002717	0.363966	No	PREDICTED: uncharacterized protein LOC105177275 isoform X1	Sesamum indicum	NA	NA	NA	NA	NA
TR40033|c1_g1_i3	37.1695	110.413	1.57072	0.00107077	0.198489	No	PREDICTED: protein NRT1/ PTR FAMILY 6.4	Sesamum indicum	NA	NA	NA	NA	NA
TR3613|c0_g7_i3	35.2132	104.279	1.56626	0.00129269	0.227338	No	jasmonate ZIM-domain protein 8	Salvia miltiorrhiza	NA	NA	NA	NA	NA
TR42745|c0_g2_i1	11.7377	34.7597	1.56626	0.00587334	0.53285	No	PREDICTED: uncharacterized protein LOC105165458	Sesamum indicum	NA	NA	NA	NA	NA
TR35957|c1_g1_i1	11.7377	34.7597	1.56626	0.00587334	0.532146	No	PREDICTED: cyclin-dependent kinases regulatory subunit 1-like	Musa acuminata subsp. malaccensis	NA	NA	NA	NA	NA
TR39049|c0_g11_i1	11.7377	34.7597	1.56626	0.00587334	0.530744	No	putative xyloglucan endotransglucosylase/hydrolase protein 16	Morus notabilis	NA	cell wall organization[GO:0071555] ; xyloglucan metabolic process[GO:0010411] ; cell wall biogenesis[GO:0042546]	xyloglucan:xyloglucosyl transferase activity[GO:0016762] ; hydrolase activity, hydrolyzing O-glycosyl compounds[GO:0004553]	cell wall[GO:0005618] ; apoplast[GO:0048046]	NA
TR39827|c0_g2_i1	11.7377	34.7597	1.56626	0.00587334	0.531444	No	PREDICTED: dolichyl-diphosphooligosaccharide--protein glycosyltransferase subunit STT3A-like isoform X1	Brassica oleracea var. oleracea	NA	NA	NA	NA	NA
TR2361|c2_g1_i6	2300.6	6788.36	1.56106	0.00029533	0.0820073	No	terpene synthase 3	Origanum vulgare	Lamiaceae	metabolic process[GO:0008152]	magnesium ion binding[GO:0000287] ; terpene synthase activity[GO:0010333]	NA	NA
TR38364|c4_g2_i9	31.3006	92.0109	1.55561	0.00191274	0.290241	No	NA	NA	NA	NA	NA	NA	NA
TR2361|c2_g1_i7	2234.08	6555.27	1.55297	0.000285861	0.0803539	No	sesquiterpene synthase	Azadirachta indica var. indica	NA	NA	NA	NA	NA
TR2361|c2_g1_i2	2367.11	6933.53	1.55046	0.0003467	0.0897325	No	terpene synthase 3	Origanum vulgare	Lamiaceae	metabolic process[GO:0008152]	magnesium ion binding[GO:0000287] ; terpene synthase activity[GO:0010333]	NA	NA
TR34578|c2_g8_i1	9.78145	28.6256	1.54919	0.00507801	0.50041	No	PREDICTED: GATA transcription factor 1-like isoform X1	Sesamum indicum	NA	NA	NA	NA	NA
TR40939|c2_g5_i1	19.5629	57.2512	1.54919	0.00534697	0.515074	No	NA	NA	NA	NA	NA	NA	NA
TR2361|c2_g1_i5	2218.43	6479.61	1.54637	0.000293303	0.0821093	No	terpene synthase 3	Origanum vulgare	Lamiaceae	metabolic process[GO:0008152]	magnesium ion binding[GO:0000287] ; terpene synthase activity[GO:0010333]	NA	NA
TR34229|c2_g3_i3	37.1695	108.368	1.54375	0.00133722	0.232192	No	PREDICTED: uncharacterized protein LOC105173886	Sesamum indicum	NA	NA	NA	NA	NA
TR35186|c0_g2_i5	17.6066	51.1172	1.53769	0.00658893	0.556545	No	NA	NA	NA	NA	NA	NA	NA
TR2188|c0_g1_i2	25.4318	73.6087	1.53325	0.00356273	0.422033	No	PREDICTED: uncharacterized protein LOC105177909	Sesamum indicum	NA	NA	NA	NA	NA
TR26669|c0_g2_i1	39.1258	112.458	1.52319	0.00137445	0.235086	No	PREDICTED: ferrochelatase-2, chloroplastic	Erythranthe guttatus	NA	NA	NA	NA	NA
TR38689|c1_g1_i7	31.3006	89.9662	1.52319	0.00243573	0.340938	No	hypothetical protein CISIN_1g021726mg	Citrus sinensis	NA	oxidation-reduction process[GO:0055114]	heme binding[GO:0020037] ; oxidoreductase activity, acting on paired donors, with incorporation or reduction of molecular oxygen[GO:0016705] ; iron ion binding[GO:0005506]	NA	NA
TR42641|c0_g17_i1	15.6503	44.9831	1.52319	0.00776442	0.60792	No	NA	NA	NA	NA	NA	NA	NA
TR2361|c2_g1_i1	2265.38	6495.97	1.51979	0.000376505	0.0952891	No	terpene synthase 3	Origanum vulgare	Lamiaceae	metabolic process[GO:0008152]	magnesium ion binding[GO:0000287] ; terpene synthase activity[GO:0010333]	NA	NA
TR25751|c2_g1_i1	44.9947	128.815	1.51748	0.0009761	0.188056	No	PREDICTED: uncharacterized protein LOC105172028	Sesamum indicum	NA	NA	NA	NA	NA
TR40957|c0_g1_i1	37.1695	106.324	1.51627	0.00166915	0.264393	No	hypothetical protein MIMGU_mgv1a006251mg	Mimulus guttatus	NA	carboxylic acid biosynthetic process[GO:0046394]	transferase activity[GO:0016740]	NA	NA
TR2812|c1_g1_i4	37.1695	106.324	1.51627	0.00166915	0.265005	No	PREDICTED: probable LRR receptor-like serine/threonine-protein kinase At3g47570	Sesamum indicum	NA	NA	NA	NA	NA
TR30166|c0_g3_i1	21.5192	61.3406	1.51122	0.00572537	0.529226	No	putative polyubiquitin	Panax ginseng	NA	NA	NA	NA	NA
TR3696|c1_g1_i7	21.5192	61.3406	1.51122	0.00572537	0.529941	No	NA	NA	NA	NA	NA	NA	NA
TR9446|c0_g1_i1	21.5192	61.3406	1.51122	0.00572537	0.528514	No	PREDICTED: vestitone reductase-like	Sesamum indicum	NA	NA	NA	NA	NA
TR44737|c2_g2_i5	48.9072	139.039	1.50737	0.000843685	0.170696	No	PREDICTED: myosin-9-like	Sesamum indicum	NA	NA	NA	NA	NA
TR32488|c3_g8_i1	41.0821	116.547	1.50433	0.00140545	0.239791	No	NA	NA	NA	NA	NA	NA	NA
TR42762|c1_g6_i6	27.388	77.6981	1.50433	0.00371455	0.432547	No	PREDICTED: probable receptor-like protein kinase At5g39020 isoform X2	Fragaria vesca subsp. vesca	NA	NA	NA	NA	NA
TR43836|c1_g1_i1	13.694	38.8491	1.50433	0.00854479	0.620171	No	PREDICTED: serine/threonine-protein phosphatase 6 regulatory subunit 3	Sesamum indicum	NA	NA	NA	NA	NA
TR8915|c0_g1_i1	13.694	38.8491	1.50433	0.00854479	0.618208	No	PREDICTED: clustered mitochondria protein-like isoform X1	Citrus sinensis	NA	NA	NA	NA	NA
TR3432|c0_g3_i1	13.694	38.8491	1.50433	0.00854479	0.619515	No	hypothetical protein MIMGU_mgv1a021894mg, partial	Mimulus guttatus	NA	NA	NA	NA	NA
TR44782|c10_g13_i1	13.694	38.8491	1.50433	0.00854479	0.618861	No	PREDICTED: probable LRR receptor-like serine/threonine-protein kinase At3g47570	Sesamum indicum	NA	NA	NA	NA	NA
TR27307|c1_g1_i1	80.2079	226.96	1.50062	0.000202216	0.0654216	No	12-oxophytodienoate reductase 3, partial	Salvia miltiorrhiza	NA	oxidation-reduction process[GO:0055114]	oxidoreductase activity[GO:0016491] ; FMN binding[GO:0010181]	NA	NA
TR25295|c0_g2_i1	19.5629	55.2066	1.49672	0.00726993	0.591486	No	hypothetical protein MIMGU_mgv1a026173mg	Mimulus guttatus	NA	NA	NA	NA	NA
TR43399|c0_g3_i1	19.5629	55.2066	1.49672	0.00726993	0.592188	No	hypothetical protein MIMGU_mgv1a001924mg	Mimulus guttatus	NA	DNA topological change[GO:0006265]	DNA topoisomerase type II (ATP-hydrolyzing) activity[GO:0003918] ; DNA binding[GO:0003677] ; ATP binding[GO:0005524]	chromosome[GO:0005694]	NA
TR7583|c2_g1_i10	76.2953	214.692	1.4926	0.000255583	0.0765488	No	PREDICTED: protein TIFY 10A-like isoform X2	Sesamum indicum	NA	NA	NA	NA	NA
TR33962|c0_g1_i7	25.4318	71.5641	1.4926	0.00467195	0.482583	No	PREDICTED: putative glutamine amidotransferase YLR126C	Sesamum indicum	NA	NA	NA	NA	NA
TR37602|c0_g2_i1	56.7324	159.486	1.49118	0.000641653	0.13883	No	NA	NA	NA	NA	NA	NA	NA
TR32797|c2_g2_i3	31.3006	87.9216	1.49003	0.00309948	0.393674	No	PREDICTED: probable S-adenosylmethionine-dependent methyltransferase At5g37990	Sesamum indicum	NA	NA	NA	NA	NA
TR44215|c1_g8_i8	31.3006	87.9216	1.49003	0.00309948	0.392946	No	PREDICTED: probable galactinol--sucrose galactosyltransferase 2	Sesamum indicum	NA	NA	NA	NA	NA
TR35186|c0_g1_i7	48.9072	136.994	1.48599	0.00101902	0.194685	No	PREDICTED: uncharacterized protein LOC105160086	Sesamum indicum	NA	NA	NA	NA	NA
TR28434|c0_g2_i1	66.5138	186.067	1.48409	0.000424658	0.103651	No	hypothetical protein CICLE_v10022542mg	Citrus clementina	NA	response to stress[GO:0006950]	NA	NA	NA
TR42400|c0_g2_i1	29.3443	81.7875	1.4788	0.00384805	0.440611	No	NA	NA	NA	NA	NA	NA	NA
TR43912|c1_g1_i2	29.3443	81.7875	1.4788	0.00384805	0.439877	No	NA	NA	NA	NA	NA	NA	NA
TR2849|c1_g2_i1	11.7377	32.715	1.4788	0.00868162	0.622201	No	Vacuolar H+-pumping ATPase 16 kDa proteolipid subunit 4 isoform 2, partial	Theobroma cacao	NA	ATP hydrolysis coupled proton transport[GO:0015991]	hydrogen ion transmembrane transporter activity[GO:0015078]	proton-transporting V-type ATPase, V0 domain[GO:0033179] ; integral component of membrane[GO:0016021]	NA
TR31056|c0_g1_i6	11.7377	32.715	1.4788	0.00868162	0.619611	No	NA	NA	NA	NA	NA	NA	NA
TR31155|c0_g1_i1	11.7377	32.715	1.4788	0.00868162	0.620257	No	PREDICTED: uncharacterized protein LOC105173634	Sesamum indicum	NA	NA	NA	NA	NA
TR39347|c0_g4_i1	11.7377	32.715	1.4788	0.00868162	0.623504	No	PREDICTED: phospholipase A1-Igamma3, chloroplastic	Sesamum indicum	NA	NA	NA	NA	NA
TR41586|c0_g2_i4	11.7377	32.715	1.4788	0.00868162	0.620903	No	PREDICTED: uncharacterized protein LOC105177379	Sesamum indicum	NA	NA	NA	NA	NA
TR41757|c0_g4_i1	11.7377	32.715	1.4788	0.00868162	0.617683	No	PREDICTED: scarecrow-like protein 8	Sesamum indicum	NA	NA	NA	NA	NA
TR43209|c1_g3_i1	11.7377	32.715	1.4788	0.00868162	0.622852	No	PREDICTED: probable clathrin assembly protein At4g32285	Sesamum indicum	NA	NA	NA	NA	NA
TR29648|c0_g2_i1	11.7377	32.715	1.4788	0.00868162	0.621552	No	NA	NA	NA	NA	NA	NA	NA
TR38186|c0_g6_i1	11.7377	32.715	1.4788	0.00868162	0.618324	No	hypothetical protein CISIN_1g0472481mg, partial	Citrus sinensis	NA	NA	metal ion binding[GO:0046872]	NA	NA
TR43042|c1_g6_i2	11.7377	32.715	1.4788	0.00868162	0.618967	No	Serine-threonine protein kinase	Theobroma cacao	NA	NA	NA	membrane[GO:0016020]	NA
TR32114|c2_g1_i2	17.6066	49.0725	1.4788	0.00905635	0.625527	No	NA	NA	NA	NA	NA	NA	NA
TR7458|c0_g1_i4	17.6066	49.0725	1.4788	0.00905635	0.624897	No	PREDICTED: uncharacterized protein LOC105164832	Sesamum indicum	NA	NA	NA	NA	NA
TR36728|c0_g3_i3	95.8582	265.809	1.47142	0.000173143	0.0593768	No	PREDICTED: transcription factor BEE 2	Sesamum indicum	NA	NA	NA	NA	NA
TR40833|c2_g3_i1	33.2569	92.0109	1.46815	0.00316742	0.387935	No	PREDICTED: uncharacterized protein LOC105953310	Erythranthe guttatus	NA	NA	NA	NA	NA
TR32322|c0_g1_i2	60.645	167.664	1.46712	0.00066198	0.141885	No	PREDICTED: uncharacterized protein LOC100257698	Vitis vinifera	NA	NA	NA	NA	NA
TR43807|c0_g4_i5	27.388	75.6534	1.46586	0.0048094	0.492332	No	NA	NA	NA	NA	NA	NA	NA
TR30066|c0_g1_i5	48.9072	134.949	1.4643	0.00123056	0.219792	No	PREDICTED: cytokinin riboside 5'-monophosphate phosphoribohydrolase LOG3	Sesamum indicum	NA	NA	NA	NA	NA
TR37696|c2_g2_i5	70.4264	194.245	1.46369	0.000438133	0.106185	No	hypothetical protein MIMGU_mgv1a012018mg	Mimulus guttatus	NA	NA	NA	NA	NA
TR41239|c0_g1_i3	21.5192	59.2959	1.46231	0.00768875	0.605452	No	PREDICTED: monothiol glutaredoxin-S4-like	Sesamum indicum	NA	NA	NA	NA	NA
TR34869|c0_g3_i1	2410.15	6630.92	1.46009	0.000677128	0.143784	No	chloroplast ribulose-1,5-bisphosphate carboxylase/oxygenase activase	Solenostemon scutellarioides	NA	NA	ATP binding[GO:0005524]	NA	NA
TR29381|c1_g1_i1	15.6503	42.9384	1.45608	0.010794	0.6761	No	PREDICTED: EPIDERMAL PATTERNING FACTOR-like protein 9	Sesamum indicum	NA	NA	NA	NA	NA
TR38853|c2_g2_i2	15.6503	42.9384	1.45608	0.010794	0.674867	No	hypothetical protein, partial	Bruguiera gymnorhiza	NA	NA	NA	NA	NA
TR32032|c1_g2_i4	15.6503	42.9384	1.45608	0.010794	0.674253	No	NA	NA	NA	NA	NA	NA	NA
TR40669|c0_g5_i2	15.6503	42.9384	1.45608	0.010794	0.673639	No	PREDICTED: peroxisome biogenesis protein 5	Sesamum indicum	NA	NA	NA	NA	NA
TR42323|c1_g8_i1	15.6503	42.9384	1.45608	0.010794	0.675483	No	PREDICTED: polycomb group protein EMBRYONIC FLOWER 2 isoform X5	Sesamum indicum	NA	NA	NA	NA	NA
TR30583|c0_g2_i2	88.033	241.273	1.45455	0.000255438	0.0768409	No	PREDICTED: multiprotein-bridging factor 1a-like	Sesamum indicum	NA	NA	NA	NA	NA
TR39392|c0_g6_i1	56.7324	155.396	1.45371	0.000907774	0.176879	No	PREDICTED: aspartate aminotransferase, mitochondrial isoform X2	Sesamum indicum	NA	NA	NA	NA	NA
TR38347|c2_g3_i1	25.4318	69.5194	1.45078	0.00612509	0.538591	No	PREDICTED: probable LRR receptor-like serine/threonine-protein kinase At3g47570	Erythranthe guttatus	NA	NA	NA	NA	NA
TR40033|c1_g1_i5	95.8582	261.72	1.44905	0.000220161	0.0692669	No	PREDICTED: protein NRT1/ PTR FAMILY 6.4	Sesamum indicum	NA	NA	NA	NA	NA
TR44738|c7_g5_i6	54.7761	149.262	1.44623	0.00106875	0.198651	No	NA	NA	NA	NA	NA	NA	NA
TR35211|c1_g1_i7	39.1258	106.324	1.44227	0.00261857	0.357057	No	hypothetical protein MIMGU_mgv1a005472mg	Mimulus guttatus	NA	metabolic process[GO:0008152]	transferase activity, transferring hexosyl groups[GO:0016758]	NA	NA
TR38425|c0_g1_i7	29.3443	79.7428	1.44227	0.00492821	0.494168	No	Putative Glutamine amidotransferase	Morus notabilis	NA	DNA repair[GO:0006281]	catalytic activity[GO:0003824]	NA	NA
TR42862|c0_g1_i1	29.3443	79.7428	1.44227	0.00492821	0.494892	No	PREDICTED: putative 12-oxophytodienoate reductase 11	Pyrus x bretschneideri	NA	NA	NA	NA	NA
TR36544|c0_g4_i1	9.78145	26.5809	1.44227	0.00801628	0.608199	No	PREDICTED: protein trichome birefringence-like 19	Sesamum indicum	NA	NA	NA	NA	NA
TR37493|c0_g2_i1	9.78145	26.5809	1.44227	0.00801628	0.608873	No	hypothetical protein MIMGU_mgv1a010115mg	Mimulus guttatus	NA	GPI anchor metabolic process[GO:0006505] ; intracellular protein transport[GO:0006886]	hydrolase activity, acting on ester bonds[GO:0016788]	intracellular[GO:0005622]	NA
TR38367|c0_g7_i3	9.78145	26.5809	1.44227	0.00801628	0.609548	No	PREDICTED: uncharacterized protein LOC105176972	Sesamum indicum	NA	NA	NA	NA	NA
TR42379|c0_g1_i1	9.78145	26.5809	1.44227	0.00801628	0.610903	No	hypothetical protein MIMGU_mgv1a000328mg	Mimulus guttatus	NA	NA	NA	NA	NA
TR39905|c0_g6_i1	9.78145	26.5809	1.44227	0.00801628	0.607527	No	NA	NA	NA	NA	NA	NA	NA
TR42961|c1_g2_i7	9.78145	26.5809	1.44227	0.00801628	0.610225	No	PREDICTED: putative tRNA pseudouridine synthase	Sesamum indicum	NA	NA	NA	NA	NA
TR38123|c3_g4_i3	19.5629	53.1619	1.44227	0.00987051	0.652205	No	PREDICTED: fumarylacetoacetase	Sesamum indicum	NA	NA	NA	NA	NA
TR30447|c0_g1_i10	19.5629	53.1619	1.44227	0.00987051	0.653464	No	PREDICTED: protein YLS3-like	Sesamum indicum	NA	NA	NA	NA	NA
TR38469|c4_g1_i2	19.5629	53.1619	1.44227	0.00987051	0.652834	No	hypothetical protein MIMGU_mgv1a018251mg, partial	Mimulus guttatus	NA	oxidation-reduction process[GO:0055114]	fatty-acyl-CoA reductase (alcohol-forming) activity[GO:0080019]	NA	NA
TR41319|c1_g1_i4	91.9456	249.452	1.43991	0.000267433	0.0777221	No	NA	NA	NA	NA	NA	NA	NA
TR31737|c1_g6_i1	43.0384	116.547	1.43722	0.00215002	0.316445	No	NA	NA	NA	NA	NA	NA	NA
TR37450|c1_g8_i1	33.2569	89.9662	1.43573	0.0039972	0.442901	No	PREDICTED: benzyl alcohol O-benzoyltransferase-like	Erythranthe guttatus	NA	NA	NA	NA	NA
TR14927|c0_g2_i1	23.4755	63.3853	1.43299	0.00791892	0.61095	No	NA	NA	NA	NA	NA	NA	NA
TR7473|c0_g1_i3	37.1695	100.19	1.43054	0.00323451	0.394042	No	PREDICTED: MYB-like transcription factor ETC3	Sesamum indicum	NA	NA	NA	NA	NA
TR30583|c0_g2_i4	37.1695	100.19	1.43054	0.00323451	0.393343	No	PREDICTED: multiprotein-bridging factor 1a-like	Sesamum indicum	NA	NA	NA	NA	NA
TR39255|c1_g2_i2	101.727	273.988	1.42941	0.000237779	0.0731325	No	hypothetical protein MIMGU_mgv1a0015912mg, partial	Mimulus guttatus	NA	phosphorelay signal transduction system[GO:0000160] ; signal transduction by protein phosphorylation[GO:0023014]	phosphorelay sensor kinase activity[GO:0000155]	intracellular[GO:0005622]	NA
TR41319|c1_g2_i2	50.8635	136.994	1.42941	0.00149852	0.24766	No	NA	NA	NA	NA	NA	NA	NA
TR42013|c1_g5_i1	27.388	73.6087	1.42633	0.0062276	0.542046	No	PREDICTED: protein BPS1, chloroplastic-like	Sesamum indicum	NA	NA	NA	NA	NA
TR38288|c3_g5_i9	27.388	73.6087	1.42633	0.0062276	0.541359	No	PREDICTED: protein SUPPRESSOR OF FRI 4 isoform X1	Sesamum indicum	NA	NA	NA	NA	NA
TR37327|c0_g3_i1	13.694	36.8044	1.42633	0.0122112	0.706181	No	PREDICTED: rac-like GTP-binding protein RHO1 isoform 1	Vitis vinifera	NA	small GTPase mediated signal transduction[GO:0007264]	GTP binding[GO:0005525]	intracellular[GO:0005622] ; membrane[GO:0016020]	NA
TR39771|c0_g2_i1	13.694	36.8044	1.42633	0.0122112	0.705586	No	PREDICTED: probable sulfate transporter 3.3	Sesamum indicum	NA	NA	NA	NA	NA
TR42030|c1_g3_i1	13.694	36.8044	1.42633	0.0122112	0.703807	No	PREDICTED: phosphoribosylformylglycinamidine cyclo-ligase, chloroplastic	Brassica napus	NA	NA	NA	NA	NA
TR21221|c0_g1_i2	13.694	36.8044	1.42633	0.0122112	0.704992	No	PREDICTED: subtilisin-like protease SDD1	Sesamum indicum	NA	NA	NA	NA	NA
TR44782|c9_g1_i1	13.694	36.8044	1.42633	0.0122112	0.704399	No	hypothetical protein MIMGU_mgv1a025800mg	Mimulus guttatus	NA	NA	kinase activity[GO:0016301]	NA	NA
TR21800|c0_g1_i1	93.9019	251.497	1.42131	0.000309281	0.0841772	No	hypothetical protein MIMGU_mgv1a011266mg	Mimulus guttatus	NA	cell wall organization[GO:0071555] ; xyloglucan metabolic process[GO:0010411] ; cell wall biogenesis[GO:0042546]	xyloglucan:xyloglucosyl transferase activity[GO:0016762] ; hydrolase activity, hydrolyzing O-glycosyl compounds[GO:0004553]	cell wall[GO:0005618] ; apoplast[GO:0048046]	NA
TR36417|c3_g1_i2	31.3006	83.8322	1.42131	0.00500645	0.498371	No	NA	NA	NA	NA	NA	NA	NA
TR32470|c0_g1_i3	48.9072	130.86	1.4199	0.00179304	0.276981	No	diacylglycerol acyltransferase type 2	Olea europaea	NA	NA	transferase activity, transferring acyl groups[GO:0016746]	membrane[GO:0016020]	NA
TR40005|c0_g4_i1	66.5138	177.888	1.41924	0.000799498	0.163687	No	NA	NA	NA	NA	NA	NA	NA
TR31982|c0_g2_i3	35.2132	94.0556	1.4174	0.00402379	0.444411	No	PREDICTED: probable carbohydrate esterase At4g34215-like	Glycine max	NA	NA	NA	NA	NA
TR32035|c0_g3_i8	17.6066	47.0278	1.4174	0.012432	0.709379	No	NA	NA	NA	NA	NA	NA	NA
TR36096|c0_g3_i7	91.9456	245.362	1.41606	0.000343245	0.0898555	No	hypothetical protein B456_009G029600	Gossypium raimondii	NA	NA	NA	NA	NA
TR3613|c0_g7_i4	21.5192	57.2512	1.41168	0.0103119	0.668488	No	jasmonate ZIM-domain protein 8	Salvia miltiorrhiza	NA	NA	NA	NA	NA
TR42502|c1_g1_i4	1385.05	3672.26	1.40673	0.000263383	0.0771994	No	PREDICTED: linoleate 13S-lipoxygenase 2-1, chloroplastic-like	Sesamum indicum	NA	NA	NA	NA	NA
TR7583|c2_g1_i3	142.809	378.267	1.40532	0.000160948	0.0574945	No	PREDICTED: protein TIFY 10A-like isoform X1	Sesamum indicum	NA	NA	NA	NA	NA
TR36610|c0_g1_i2	33.2569	87.9216	1.40256	0.00503994	0.49809	No	NA	NA	NA	NA	NA	NA	NA
TR27937|c0_g1_i3	37.1695	98.145	1.4008	0.0040268	0.444029	No	PREDICTED: probable glutathione S-transferase	Malus domestica	NA	NA	NA	NA	NA
TR30416|c0_g1_i2	127.159	335.329	1.39894	0.000211737	0.0675461	No	MYB-related transcription factor	Salvia miltiorrhiza	NA	NA	NA	NA	NA
TR39204|c0_g2_i1	86.0767	226.96	1.39874	0.000482666	0.113762	No	NA	NA	NA	NA	NA	NA	NA
TR33962|c0_g1_i14	56.7324	149.262	1.3956	0.00152268	0.250447	No	PREDICTED: putative glutamine amidotransferase YLR126C	Sesamum indicum	NA	NA	NA	NA	NA
TR40516|c0_g2_i1	2605.78	6843.57	1.39304	0.00129675	0.227468	No	stachyose synthase	Stachys affinis	Lamiaceae	metabolic process[GO:0008152]	galactinol-raffinose galactosyltransferase activity[GO:0047268]	NA	map00052:Galactose metabolism(galactosyltransferase[ec:2.4.1.67])
TR36925|c0_g4_i3	3601.53	9430.1	1.38866	0.0030295	0.388382	No	O-methyltransferase	Mentha x piperita	NA	methylation[GO:0032259]	O-methyltransferase activity[GO:0008171] ; protein dimerization activity[GO:0046983]	NA	NA
TR42502|c1_g2_i1	156.503	408.937	1.38569	0.000172381	0.0597126	No	Lipoxygenase	Theobroma cacao	NA	oxylipin biosynthetic process[GO:0031408] ; oxidation-reduction process[GO:0055114]	metal ion binding[GO:0046872] ; oxidoreductase activity, acting on single donors with incorporation of molecular oxygen, incorporation of two atoms of oxygen[GO:0016702]	NA	NA
TR32322|c0_g1_i7	82.1641	214.692	1.38569	0.000620408	0.135085	No	PREDICTED: uncharacterized protein LOC105155373	Sesamum indicum	NA	NA	NA	NA	NA
TR36889|c1_g2_i2	31.3006	81.7875	1.38569	0.00635397	0.5468	No	NA	NA	NA	NA	NA	NA	NA
TR33716|c3_g1_i1	27.388	71.5641	1.38569	0.00806255	0.607677	No	unnamed protein product	Coffea canephora	NA	NA	NA	NA	NA
TR36728|c0_g6_i4	27.388	71.5641	1.38569	0.00806255	0.60701	No	hypothetical protein MIMGU_mgv1a010637mg	Mimulus guttatus	NA	regulation of transcription, DNA-templated[GO:0006355]	protein dimerization activity[GO:0046983] ; transcription factor activity, sequence-specific DNA binding[GO:0003700]	nucleus[GO:0005634]	NA
TR34380|c0_g1_i2	23.4755	61.3406	1.38569	0.0104927	0.677014	No	PREDICTED: uncharacterized protein LOC105174762	Sesamum indicum	NA	NA	NA	NA	NA
TR29406|c0_g7_i4	11.7377	30.6703	1.38569	0.0130072	0.717722	No	NA	NA	NA	NA	NA	NA	NA
TR3316|c0_g1_i1	11.7377	30.6703	1.38569	0.0130072	0.718878	No	NA	NA	NA	NA	NA	NA	NA
TR33447|c1_g3_i1	11.7377	30.6703	1.38569	0.0130072	0.7183	No	PREDICTED: uncharacterized protein LOC105170357	Sesamum indicum	NA	NA	NA	NA	NA
TR36125|c1_g1_i7	11.7377	30.6703	1.38569	0.0130072	0.716569	No	hypothetical protein MIMGU_mgv1a008123mg	Mimulus guttatus	NA	NA	NA	NA	NA
TR40787|c0_g1_i1	11.7377	30.6703	1.38569	0.0130072	0.715994	No	PREDICTED: regulator of nonsense transcripts UPF3-like	Sesamum indicum	NA	NA	NA	NA	NA
TR42936|c0_g2_i1	11.7377	30.6703	1.38569	0.0130072	0.713702	No	NA	NA	NA	NA	NA	NA	NA
TR2979|c0_g2_i2	11.7377	30.6703	1.38569	0.0130072	0.717145	No	NA	NA	NA	NA	NA	NA	NA
TR33190|c0_g2_i4	11.7377	30.6703	1.38569	0.0130072	0.714274	No	hypothetical protein EUGRSUZ_E00628	Eucalyptus grandis	NA	transport[GO:0006810]	transporter activity[GO:0005215]	integral component of membrane[GO:0016021]	NA
TR33619|c0_g1_i1	11.7377	30.6703	1.38569	0.0130072	0.715419	No	unnamed protein product	Vitis vinifera	NA	NA	NA	NA	NA
TR3421|c1_g2_i4	11.7377	30.6703	1.38569	0.0130072	0.712562	No	PREDICTED: probable E3 ubiquitin-protein ligase XERICO	Solanum lycopersicum	NA	NA	NA	NA	NA
TR41116|c0_g2_i3	11.7377	30.6703	1.38569	0.0130072	0.714846	No	PREDICTED: uncharacterized protein LOC105158762	Sesamum indicum	NA	NA	NA	NA	NA
TR38806|c1_g5_i1	11.7377	30.6703	1.38569	0.0130072	0.713132	No	NA	NA	NA	NA	NA	NA	NA
TR32201|c0_g6_i1	19.5629	51.1172	1.38569	0.0133808	0.721501	No	hypothetical protein MIMGU_mgv1a013752mg	Mimulus guttatus	NA	NA	NA	integral component of membrane[GO:0016021]	NA
TR33397|c0_g3_i1	19.5629	51.1172	1.38569	0.0133808	0.720934	No	NA	NA	NA	NA	NA	NA	NA
TR42901|c0_g6_i1	19.5629	51.1172	1.38569	0.0133808	0.719239	No	hypothetical protein MIMGU_mgv1a004486mg	Mimulus guttatus	NA	sulfate transmembrane transport[GO:1902358]	secondary active sulfate transmembrane transporter activity[GO:0008271]	integral component of membrane[GO:0016021]	NA
TR28795|c0_g1_i1	19.5629	51.1172	1.38569	0.0133808	0.719803	No	hypothetical protein MIMGU_mgv1a016078mg	Mimulus guttatus	NA	NA	NA	NA	NA
TR35721|c2_g4_i2	19.5629	51.1172	1.38569	0.0133808	0.720368	No	hypothetical protein MIMGU_mgv1a007148mg	Mimulus guttatus	NA	protoporphyrinogen IX biosynthetic process[GO:0006782]	uroporphyrinogen decarboxylase activity[GO:0004853]	NA	map00860:Porphyrin and chlorophyll metabolism(decarboxylase[ec:4.1.1.37])
TR22259|c0_g1_i1	15.6503	40.8937	1.38569	0.0150357	0.758273	No	PREDICTED: uncharacterized protein LOC105157181	Sesamum indicum	NA	NA	NA	NA	NA
TR35834|c0_g2_i6	15.6503	40.8937	1.38569	0.0150357	0.757716	No	PREDICTED: thioredoxin domain-containing protein 9 homolog	Sesamum indicum	NA	NA	NA	NA	NA
TR39039|c0_g2_i3	15.6503	40.8937	1.38569	0.0150357	0.761071	No	PREDICTED: transcription factor TCP10-like	Sesamum indicum	NA	NA	NA	NA	NA
TR43374|c0_g4_i1	15.6503	40.8937	1.38569	0.0150357	0.75939	No	PREDICTED: phosphoglucomutase, chloroplastic-like	Populus euphratica	NA	NA	NA	NA	NA
TR27787|c0_g1_i2	15.6503	40.8937	1.38569	0.0150357	0.76051	No	NA	NA	NA	NA	NA	NA	NA
TR37260|c4_g1_i1	15.6503	40.8937	1.38569	0.0150357	0.75995	No	Dual specificity protein phosphatase, putative	Ricinus communis	NA	peptidyl-tyrosine dephosphorylation[GO:0035335]	protein tyrosine phosphatase activity[GO:0004725] ; protein tyrosine/serine/threonine phosphatase activity[GO:0008138]	NA	NA
TR43273|c0_g6_i1	15.6503	40.8937	1.38569	0.0150357	0.758831	No	PREDICTED: NPL4-like protein 1	Sesamum indicum	NA	NA	NA	NA	NA
TR35420|c1_g2_i7	127.159	331.239	1.38124	0.000256354	0.0764459	No	NA	NA	NA	NA	NA	NA	NA
TR34869|c0_g3_i3	5831.7	15177.7	1.37997	0.0105094	0.675547	No	chloroplast ribulose-1,5-bisphosphate carboxylase/oxygenase activase	Solenostemon scutellarioides	NA	NA	ATP binding[GO:0005524]	NA	NA
TR3696|c1_g1_i1	183.891	478.457	1.37954	0.000145227	0.0535521	No	sabinene synthase	Salvia pomifera	Lamiaceae	metabolic process[GO:0008152]	magnesium ion binding[GO:0000287] ; terpene synthase activity[GO:0010333]	NA	NA
TR41507|c1_g2_i1	80.2079	208.558	1.37863	0.000708442	0.14814	No	PREDICTED: 3-ketoacyl-CoA synthase 11	Sesamum indicum	NA	NA	NA	NA	NA
TR34869|c0_g1_i1	3460.68	8959.82	1.37242	0.00299442	0.38605	No	chloroplast ribulose-1,5-bisphosphate carboxylase/oxygenase activase	Solenostemon scutellarioides	NA	NA	ATP binding[GO:0005524]	NA	NA
TR34869|c0_g3_i2	1905.43	4931.79	1.372	0.00070707	0.148305	No	NA	NA	NA	NA	NA	NA	NA
TR33397|c0_g1_i1	37.1695	96.1003	1.37042	0.00500895	0.496458	No	PREDICTED: UPF0483 protein AGAP003155	Erythranthe guttatus	NA	NA	NA	NA	NA
TR42301|c1_g5_i5	37.1695	96.1003	1.37042	0.00500895	0.497177	No	PREDICTED: cytochrome P450 CYP72A219-like	Sesamum indicum	NA	NA	NA	NA	NA
TR43123|c0_g5_i1	29.3443	75.6534	1.36632	0.0080674	0.606709	No	PREDICTED: peptidyl-prolyl cis-trans isomerase FKBP62	Sesamum indicum	NA	NA	NA	NA	NA
TR33710|c0_g1_i5	50.8635	130.86	1.36332	0.00259442	0.3566	No	hypothetical protein MIMGU_mgv11b016964mg	Mimulus guttatus	NA	NA	metal ion binding[GO:0046872] ; metallopeptidase activity[GO:0008237]	NA	NA
TR30775|c0_g4_i2	25.4318	65.43	1.36332	0.0105088	0.676775	No	NA	NA	NA	NA	NA	NA	NA
TR37740|c0_g2_i7	25.4318	65.43	1.36332	0.0105088	0.67614	No	hypothetical protein MIMGU_mgv1a009234mg	Mimulus guttatus	NA	NA	zinc ion binding[GO:0008270]	NA	NA
TR40823|c0_g3_i2	133.028	341.463	1.36	0.000297434	0.0819281	No	hypothetical protein SOVF_023890	Spinacia oleracea	NA	NA	NA	integral component of membrane[GO:0016021]	NA
TR40812|c0_g3_i3	43.0384	110.413	1.35922	0.00394261	0.442572	No	PREDICTED: uncharacterized protein LOC105179858	Sesamum indicum	NA	NA	NA	NA	NA
TR43863|c0_g5_i1	60.645	155.396	1.35749	0.001793	0.2776	No	PREDICTED: staphylococcal nuclease domain-containing protein 1	Sesamum indicum	NA	NA	NA	NA	NA
TR23105|c1_g2_i3	39.1258	100.19	1.35654	0.00495925	0.496555	No	alcohol acetyltransferase	Lavandula x intermedia	NA	NA	NA	NA	NA
TR26365|c0_g1_i2	250.405	639.987	1.35378	0.000136024	0.0518304	No	PREDICTED: ferredoxin-1, chloroplastic	Brassica oleracea var. oleracea	NA	electron transport chain[GO:0022900] ; pentose-phosphate shunt[GO:0006098] ; abscisic acid biosynthetic process[GO:0009688]	2 iron, 2 sulfur cluster binding[GO:0051537] ; metal ion binding[GO:0046872] ; electron carrier activity[GO:0009055]	chloroplast stroma[GO:0009570]	NA
TR33748|c3_g3_i9	35.2132	89.9662	1.35327	0.00630213	0.545763	No	PREDICTED: probable LRR receptor-like serine/threonine-protein kinase At3g47570	Sesamum indicum	NA	NA	NA	NA	NA
TR3903|c0_g1_i1	17.6066	44.9831	1.35327	0.0170461	0.787299	No	NA	NA	NA	NA	NA	NA	NA
TR39290|c0_g5_i1	17.6066	44.9831	1.35327	0.0170461	0.787829	No	PREDICTED: folylpolyglutamate synthase isoform X2	Sesamum indicum	NA	NA	NA	NA	NA
TR44240|c3_g4_i4	17.6066	44.9831	1.35327	0.0170461	0.786769	No	PREDICTED: F-box protein At5g03100-like	Nicotiana tomentosiformis	NA	NA	NA	NA	NA
TR37850|c0_g3_i1	17.6066	44.9831	1.35327	0.0170461	0.788361	No	PREDICTED: uncharacterized protein LOC105169576	Sesamum indicum	NA	NA	NA	NA	NA
TR36691|c0_g2_i4	150.634	384.401	1.35156	0.000266087	0.07766	No	PREDICTED: probable galactinol--sucrose galactosyltransferase 2	Sesamum indicum	NA	NA	NA	NA	NA
TR41593|c0_g4_i1	48.9072	124.726	1.35064	0.00314506	0.39078	No	PREDICTED: translation factor GUF1 homolog, chloroplastic	Sesamum indicum	NA	NA	NA	NA	NA
TR26775|c0_g1_i1	160.416	408.937	1.35006	0.000245757	0.0745829	No	PREDICTED: uncharacterized protein LOC101256982	Solanum lycopersicum	NA	NA	NA	NA	NA
TR23619|c0_g1_i1	31.3006	79.7428	1.34916	0.00805578	0.608504	No	PREDICTED: probable serine/threonine-protein kinase At1g54610	Sesamum indicum	NA	NA	NA	NA	NA
TR44190|c2_g2_i1	31.3006	79.7428	1.34916	0.00805578	0.609175	No	hypothetical protein M569_03564, partial	Genlisea aurea	NA	oxidation-reduction process[GO:0055114] ; amine metabolic process[GO:0009308]	copper ion binding[GO:0005507] ; quinone binding[GO:0048038] ; primary amine oxidase activity[GO:0008131]	NA	map00260:Glycine, serine and threonine metabolism(oxidase[ec:1.4.3.21]) ; map00350:Tyrosine metabolism(oxidase[ec:1.4.3.21]) ; map00410:beta-Alanine metabolism(oxidase[ec:1.4.3.21]) ; map00950:Isoquinoline alkaloid biosynthesis(oxidase[ec:1.4.3.21]) ; map00360:Phenylalanine metabolism(oxidase[ec:1.4.3.21]) ; map00960:Tropane, piperidine and pyridine alkaloid biosynthesis(oxidase[ec:1.4.3.21])
TR39297|c1_g1_i1	44.9947	114.502	1.34755	0.00389573	0.439468	No	PREDICTED: uncharacterized protein LOC105168308	Sesamum indicum	NA	NA	NA	NA	NA
TR4084|c0_g1_i1	217.148	552.066	1.34616	0.000171556	0.0600332	No	PREDICTED: putative UPF0481 protein At3g02645	Sesamum indicum	NA	NA	NA	NA	NA
TR1593|c0_g1_i1	99.7708	253.541	1.34553	0.000588784	0.129849	No	NA	NA	NA	NA	NA	NA	NA
TR24351|c0_g1_i5	41.0821	104.279	1.34387	0.00489453	0.492953	No	PREDICTED: photosystem I subunit O	Sesamum indicum	NA	NA	NA	NA	NA
TR38524|c2_g5_i1	13.694	34.7597	1.34387	0.0175799	0.791697	No	hypothetical protein MIMGU_mgv1a004862mg	Mimulus guttatus	NA	protein phosphorylation[GO:0006468]	protein kinase activity[GO:0004672] ; ATP binding[GO:0005524]	NA	NA
TR42833|c1_g3_i1	13.694	34.7597	1.34387	0.0175799	0.78756	No	PREDICTED: acetyl-coenzyme A carboxylase carboxyl transferase subunit alpha, chloroplastic	Sesamum indicum	NA	NA	NA	NA	NA
TR43210|c0_g3_i1	13.694	34.7597	1.34387	0.0175799	0.789623	No	PREDICTED: pathogenesis-related homeodomain protein isoform X2	Sesamum indicum	NA	NA	NA	NA	NA
TR44307|c0_g1_i1	13.694	34.7597	1.34387	0.0175799	0.791177	No	PREDICTED: uncharacterized protein LOC105157329 isoform X2	Sesamum indicum	NA	NA	NA	NA	NA
TR26275|c1_g1_i5	13.694	34.7597	1.34387	0.0175799	0.787046	No	NA	NA	NA	NA	NA	NA	NA
TR33805|c0_g1_i1	13.694	34.7597	1.34387	0.0175799	0.790659	No	hypothetical protein MIMGU_mgv1a0056111mg, partial	Mimulus guttatus	NA	D-xylose metabolic process[GO:0042732] ; pentose-phosphate shunt[GO:0006098]	metal ion binding[GO:0046872] ; xylose isomerase activity[GO:0009045]	NA	map00051:Fructose and mannose metabolism(isomerase[ec:5.3.1.5]) ; map00040:Pentose and glucuronate interconversions(isomerase[ec:5.3.1.5])
TR38828|c0_g2_i1	13.694	34.7597	1.34387	0.0175799	0.789106	No	NA	NA	NA	NA	NA	NA	NA
TR39642|c0_g1_i10	13.694	34.7597	1.34387	0.0175799	0.78859	No	hypothetical protein MIMGU_mgv1a009693mg	Mimulus guttatus	NA	proteolysis[GO:0006508]	aspartic-type endopeptidase activity[GO:0004190]	NA	NA
TR42913|c1_g5_i1	13.694	34.7597	1.34387	0.0175799	0.790141	No	PREDICTED: 6-phosphofructo-2-kinase/fructose-2,6-bisphosphatase	Sesamum indicum	NA	NA	NA	NA	NA
TR44359|c0_g3_i7	13.694	34.7597	1.34387	0.0175799	0.788075	No	hypothetical protein MIMGU_mgv1a000783mg	Mimulus guttatus	NA	NA	NA	integral component of membrane[GO:0016021]	NA
TR3571|c1_g1_i2	242.58	615.451	1.34318	0.000158045	0.0573536	No	PREDICTED: chitinase 6-like	Eucalyptus grandis	NA	organic substance metabolic process[GO:0071704]	NA	NA	NA
TR40033|c1_g1_i1	174.11	441.652	1.34291	0.000236027	0.0729206	No	PREDICTED: protein NRT1/ PTR FAMILY 6.4	Sesamum indicum	NA	NA	NA	NA	NA
TR42635|c0_g2_i4	37.1695	94.0556	1.3394	0.00622497	0.543196	No	cytochrome P450 CYP97B34	Salvia miltiorrhiza	NA	oxidation-reduction process[GO:0055114]	heme binding[GO:0020037] ; oxidoreductase activity, acting on paired donors, with incorporation or reduction of molecular oxygen[GO:0016705] ; monooxygenase activity[GO:0004497] ; iron ion binding[GO:0005506]	NA	NA
TR42888|c1_g5_i2	37.1695	94.0556	1.3394	0.00622497	0.542506	No	PREDICTED: uncharacterized protein LOC105161040	Sesamum indicum	NA	NA	NA	NA	NA
TR32150|c0_g2_i1	46.9509	118.592	1.33678	0.00384399	0.441621	No	hypothetical protein POPTR_0004s08350g, partial	Populus trichocarpa	NA	NA	NA	NA	NA
TR29702|c0_g9_i3	23.4755	59.2959	1.33678	0.0138844	0.731965	No	PREDICTED: aquaporin PIP2-4-like	Sesamum indicum	NA	NA	NA	NA	NA
TR40547|c0_g1_i3	23.4755	59.2959	1.33678	0.0138844	0.733092	No	NA	NA	NA	NA	NA	NA	NA
TR43953|c5_g2_i1	23.4755	59.2959	1.33678	0.0138844	0.731403	No	PREDICTED: subtilisin-like protease	Sesamum indicum	NA	NA	NA	NA	NA
TR33763|c0_g1_i6	23.4755	59.2959	1.33678	0.0138844	0.732528	No	PREDICTED: phototropin-2 isoform X1	Sesamum indicum	NA	NA	NA	NA	NA
TR31910|c1_g1_i6	80.2079	202.424	1.33557	0.00107421	0.196997	No	expansin	Breonia chinensis	NA	plant-type cell wall organization[GO:0009664]	NA	integral component of membrane[GO:0016021] ; extracellular region[GO:0005576] ; cell wall[GO:0005618]	NA
TR32682|c4_g2_i3	166.285	419.161	1.33385	0.000278152	0.0788331	No	PREDICTED: bifunctional epoxide hydrolase 2-like	Nicotiana tomentosiformis	NA	NA	NA	NA	NA
TR25780|c0_g1_i1	33.2569	83.8322	1.33385	0.00798872	0.609479	No	PREDICTED: plasma membrane ATPase 4-like	Sesamum indicum	NA	NA	NA	NA	NA
TR33735|c2_g1_i1	125.203	314.882	1.33055	0.000449473	0.10779	No	allene oxide cyclase	Salvia miltiorrhiza	NA	NA	NA	NA	NA
TR32543|c1_g1_i3	383.433	963.048	1.32863	0.000144069	0.0534122	No	hypothetical protein MIMGU_mgv1a006316mg	Mimulus guttatus	NA	metabolic process[GO:0008152]	transferase activity, transferring acyl groups other than amino-acyl groups[GO:0016747]	NA	NA
TR31889|c0_g2_i2	146.722	368.044	1.32679	0.000361266	0.0921121	No	PREDICTED: galactinol synthase 1	Sesamum indicum	NA	NA	NA	NA	NA
TR38425|c0_g1_i4	68.4701	171.754	1.32679	0.0017345	0.271607	No	PREDICTED: uncharacterized protein LOC105175920	Sesamum indicum	NA	NA	NA	NA	NA
TR17169|c0_g1_i1	9.78145	24.5362	1.32679	0.0172883	0.787874	No	PREDICTED: subtilisin-like protease	Sesamum indicum	NA	NA	NA	NA	NA
TR37205|c0_g5_i1	9.78145	24.5362	1.32679	0.0172883	0.788397	No	hypothetical protein PHAVU_002G2211001g, partial	Phaseolus vulgaris	NA	NA	NA	endoplasmic reticulum membrane[GO:0005789]	NA
TR16188|c0_g1_i1	9.78145	24.5362	1.32679	0.0172883	0.788922	No	PREDICTED: acetyl-coenzyme A carboxylase carboxyl transferase subunit alpha, chloroplastic-like	Sesamum indicum	NA	NA	NA	NA	NA
TR44346|c1_g2_i2	9.78145	24.5362	1.32679	0.0172883	0.789447	No	PREDICTED: uncharacterized protein LOC105159649	Sesamum indicum	NA	NA	NA	NA	NA
TR38443|c0_g1_i3	9.78145	24.5362	1.32679	0.0172883	0.789973	No	PREDICTED: maspardin isoform X2	Sesamum indicum	NA	NA	NA	NA	NA
TR44469|c1_g3_i1	19.5629	49.0725	1.32679	0.01811	0.799812	No	hypothetical protein MIMGU_mgv1a000390mg	Mimulus guttatus	NA	hydrogen ion transmembrane transport[GO:1902600] ; potassium ion transport[GO:0006813]	solute:proton antiporter activity[GO:0015299]	integral component of membrane[GO:0016021]	NA
TR17778|c0_g1_i1	19.5629	49.0725	1.32679	0.01811	0.799298	No	unnamed protein product	Coffea canephora	NA	metabolic process[GO:0008152]	nucleic acid binding[GO:0003676] ; ATP binding[GO:0005524] ; helicase activity[GO:0004386]	NA	NA
TR32930|c0_g3_i1	19.5629	49.0725	1.32679	0.01811	0.800328	No	NA	NA	NA	NA	NA	NA	NA
TR40105|c0_g2_i6	19.5629	49.0725	1.32679	0.01811	0.798784	No	PREDICTED: tryptophan synthase beta chain 1	Erythranthe guttatus	NA	NA	NA	NA	NA
TR29832|c0_g1_i2	240.624	603.183	1.32582	0.000193658	0.0638578	No	alcohol dehydrogenase-like protein	Ocimum basilicum	Lamiaceae	oxidation-reduction process[GO:0055114]	zinc ion binding[GO:0008270] ; oxidoreductase activity[GO:0016491]	NA	NA
TR36096|c0_g3_i2	84.1204	210.603	1.324	0.00106705	0.198874	No	hypothetical protein B456_009G029600	Gossypium raimondii	NA	metabolic process[GO:0008152]	hydrolase activity[GO:0016787]	NA	NA
TR30339|c1_g1_i1	119.334	298.524	1.32285	0.0005287	0.120073	No	hypothetical protein JCGZ_04435	Jatropha curcas	NA	fatty acid biosynthetic process[GO:0006633]	transferase activity, transferring acyl groups other than amino-acyl groups[GO:0016747]	integral component of membrane[GO:0016021]	NA
TR37440|c0_g1_i3	44.9947	112.458	1.32156	0.00473712	0.486385	No	PREDICTED: uncharacterized aarF domain-containing protein kinase At5g05200, chloroplastic	Sesamum indicum	NA	NA	NA	NA	NA
TR38798|c0_g1_i2	301.269	752.445	1.32054	0.000172529	0.0594636	No	PREDICTED: non-specific phospholipase C3-like	Sesamum indicum	NA	NA	NA	NA	NA
TR37696|c2_g2_i2	477.335	1192.05	1.32038	0.000160186	0.0578246	No	PREDICTED: desumoylating isopeptidase 1-like	Sesamum indicum	NA	NA	NA	NA	NA
TR31982|c0_g2_i4	35.2132	87.9216	1.3201	0.00787522	0.610325	No	PREDICTED: probable carbohydrate esterase At4g34215-like	Glycine max	NA	NA	NA	NA	NA
TR34339|c0_g1_i4	86.0767	214.692	1.31857	0.00106385	0.199361	No	PREDICTED: 3-oxo-5-alpha-steroid 4-dehydrogenase 2-like	Sesamum indicum	NA	NA	NA	NA	NA
TR37779|c0_g1_i5	86.0767	214.692	1.31857	0.00106385	0.198817	No	PREDICTED: uncharacterized protein LOC105156792	Sesamum indicum	NA	NA	NA	NA	NA
TR23887|c0_g3_i3	25.4318	63.3853	1.31752	0.0137446	0.728516	No	unknown	Lotus japonicus	NA	histidine biosynthetic process[GO:0000105]	ATP phosphoribosyltransferase activity[GO:0003879] ; magnesium ion binding[GO:0000287]	cytoplasm[GO:0005737]	map00340:Histidine metabolism(phosphoribosyltransferase[ec:2.4.2.17])
TR39127|c1_g1_i8	553.63	1378.12	1.31571	0.000179389	0.0600183	No	PREDICTED: 3-oxoacyl-[acyl-carrier-protein] reductase FabG-like	Solanum lycopersicum	NA	oxidation-reduction process[GO:0055114]	oxidoreductase activity[GO:0016491]	NA	NA
TR36489|c0_g1_i1	41.0821	102.234	1.3153	0.0060109	0.538211	No	cytochrome P450 CYP81Q43	Salvia miltiorrhiza	NA	oxidation-reduction process[GO:0055114]	heme binding[GO:0020037] ; oxidoreductase activity, acting on paired donors, with incorporation or reduction of molecular oxygen[GO:0016705] ; monooxygenase activity[GO:0004497] ; iron ion binding[GO:0005506]	NA	NA
TR24667|c1_g1_i3	93.9019	233.094	1.31169	0.000933282	0.180822	No	hypothetical protein MIMGU_mgv1a008654mg	Mimulus guttatus	NA	NA	NA	NA	NA
TR8025|c0_g6_i2	31.3006	77.6981	1.31169	0.0102019	0.665762	No	hypothetical protein MIMGU_mgv1a005920mg	Mimulus guttatus	NA	NA	NA	integral component of membrane[GO:0016021]	NA
TR28938|c0_g1_i1	15.6503	38.8491	1.31169	0.0210122	0.835459	No	FKBP-like peptidyl-prolyl cis-trans isomerase family protein isoform 1	Theobroma cacao	NA	protein folding[GO:0006457] ; protein peptidyl-prolyl isomerization[GO:0000413]	peptidyl-prolyl cis-trans isomerase activity[GO:0003755]	thylakoid lumen[GO:0031977] ; chloroplast thylakoid membrane[GO:0009535]	NA
TR38737|c0_g5_i1	15.6503	38.8491	1.31169	0.0210122	0.834009	No	PREDICTED: bifunctional aspartate aminotransferase and glutamate/aspartate-prephenate aminotransferase	Sesamum indicum	NA	NA	NA	NA	NA
TR2500|c0_g1_i3	15.6503	38.8491	1.31169	0.0210122	0.834491	No	hypothetical protein MIMGU_mgv1a014386mg	Mimulus guttatus	NA	NA	NA	integral component of membrane[GO:0016021]	NA
TR32035|c0_g6_i2	15.6503	38.8491	1.31169	0.0210122	0.833526	No	alcohol acetyltransferase	Lavandula x intermedia	NA	NA	transferase activity[GO:0016740]	NA	NA
TR43405|c1_g2_i1	15.6503	38.8491	1.31169	0.0210122	0.836914	No	PREDICTED: uncharacterized protein LOC105164119	Sesamum indicum	NA	NA	NA	NA	NA
TR24907|c1_g1_i1	15.6503	38.8491	1.31169	0.0210122	0.834975	No	PREDICTED: LRR receptor-like serine/threonine-protein kinase FLS2	Erythranthe guttatus	NA	NA	NA	NA	NA
TR30782|c1_g1_i5	15.6503	38.8491	1.31169	0.0210122	0.835944	No	PREDICTED: probable LRR receptor-like serine/threonine-protein kinase At3g47570	Sesamum indicum	NA	NA	NA	NA	NA
TR8150|c1_g1_i1	15.6503	38.8491	1.31169	0.0210122	0.836429	No	PREDICTED: SPX domain-containing membrane protein At4g22990-like	Sesamum indicum	NA	NA	NA	NA	NA
TR41507|c1_g2_i5	418.646	1038.7	1.31098	0.000174265	0.0594642	No	PREDICTED: 3-ketoacyl-CoA synthase 11	Sesamum indicum	NA	NA	NA	NA	NA
TR38527|c3_g2_i4	52.8198	130.86	1.30887	0.00367723	0.428929	No	NA	NA	NA	NA	NA	NA	NA
TR39570|c0_g2_i4	52.8198	130.86	1.30887	0.00367723	0.42966	No	hypothetical protein LR48_Vigan06g064900	Vigna angularis	NA	NA	catalytic activity[GO:0003824]	NA	NA
TR7583|c2_g1_i9	37.1695	92.0109	1.30769	0.0077285	0.606493	No	PREDICTED: protein TIFY 10A-like isoform X3	Sesamum indicum	NA	NA	NA	NA	NA
TR38459|c0_g1_i3	21.5192	53.1619	1.30477	0.0184597	0.80387	No	NA	NA	NA	NA	NA	NA	NA
TR31676|c0_g1_i1	21.5192	53.1619	1.30477	0.0184597	0.804381	No	hypothetical protein MIMGU_mgv1a013319mg	Mimulus guttatus	NA	NA	NA	NA	NA
TR33275|c0_g1_i5	221.061	545.932	1.30428	0.000268	0.0775583	No	NA	NA	NA	NA	NA	NA	NA
TR42912|c0_g1_i2	168.241	415.072	1.30283	0.000381785	0.0962702	No	PREDICTED: calcium-transporting ATPase 2, plasma membrane-type-like	Sesamum indicum	NA	NA	NA	NA	NA
TR40863|c0_g1_i8	48.9072	120.637	1.30255	0.00456298	0.476349	No	quercetin 3-O-glucoside-6''-O-malonyltransferase	Lamium purpureum	Lamiaceae	NA	transferase activity[GO:0016740]	NA	NA
TR41507|c1_g2_i6	48.9072	120.637	1.30255	0.00456298	0.477075	No	NA	NA	NA	NA	NA	NA	NA
TR36691|c0_g2_i2	166.285	408.937	1.29823	0.000407405	0.0997953	No	PREDICTED: probable galactinol--sucrose galactosyltransferase 2	Sesamum indicum	NA	NA	NA	NA	NA
TR26301|c0_g1_i2	66.5138	163.575	1.29823	0.0023902	0.337319	No	unnamed protein product	Coffea canephora	NA	NA	NA	NA	NA
TR39132|c1_g1_i7	33.2569	81.7875	1.29823	0.0100412	0.6603	No	NA	NA	NA	NA	NA	NA	NA
TR38776|c0_g2_i5	111.508	273.988	1.29696	0.000773008	0.158737	No	NA	NA	NA	NA	NA	NA	NA
TR35491|c1_g3_i5	39.1258	96.1003	1.29642	0.00755907	0.602153	No	hypothetical protein MIMGU_mgv1a012489mg	Mimulus guttatus	NA	plant-type cell wall organization[GO:0009664]	NA	extracellular region[GO:0005576] ; cell wall[GO:0005618] ; membrane[GO:0016020]	NA
TR44820|c0_g1_i2	318.875	783.115	1.29623	0.000219358	0.0693323	No	PREDICTED: uncharacterized protein LOC105177096 isoform X3	Sesamum indicum	NA	NA	NA	NA	NA
TR43953|c5_g9_i2	174.11	427.34	1.29539	0.000394486	0.0980312	No	PREDICTED: subtilisin-like protease SDD1	Sesamum indicum	NA	NA	NA	NA	NA
TR42649|c2_g9_i1	44.9947	110.413	1.29509	0.00575601	0.529916	No	NA	NA	NA	NA	NA	NA	NA
TR39746|c0_g1_i4	56.7324	139.039	1.29324	0.00356834	0.421968	No	PREDICTED: trihelix transcription factor GTL1 isoform X2	Sesamum indicum	NA	NA	NA	NA	NA
TR39127|c1_g1_i2	181.935	445.742	1.29279	0.000382782	0.095817	No	PREDICTED: 3-oxoacyl-[acyl-carrier-protein] reductase FabG-like	Solanum lycopersicum	NA	oxidation-reduction process[GO:0055114]	oxidoreductase activity[GO:0016491]	NA	NA
TR44221|c4_g4_i9	97.8145	239.228	1.29027	0.00105385	0.199121	No	PREDICTED: putative disease resistance RPP13-like protein 1	Sesamum indicum	NA	NA	NA	NA	NA
TR40068|c3_g1_i1	207.367	507.082	1.29004	0.00033592	0.089999	No	PREDICTED: LOW QUALITY PROTEIN: benzyl alcohol O-benzoyltransferase-like	Sesamum indicum	NA	NA	NA	NA	NA
TR7910|c0_g2_i6	109.552	267.854	1.28983	0.000855806	0.171129	No	hypothetical protein EUTSA_v10007514mg	Eutrema salsugineum	NA	biosynthetic process[GO:0009058]	pyridoxal phosphate binding[GO:0030170] ; catalytic activity[GO:0003824]	NA	NA
TR40516|c0_g1_i2	3018.55	7373.14	1.28842	0.00351904	0.420488	No	PREDICTED: stachyose synthase	Sesamum indicum	NA	NA	NA	NA	NA
TR39724|c0_g2_i1	58.6887	143.128	1.28615	0.00351205	0.420386	No	PREDICTED: putative UDP-sugar transporter DDB_G0278631 isoform X1	Sesamum indicum	NA	NA	NA	NA	NA
TR3877|c0_g4_i1	46.9509	114.502	1.28615	0.00562343	0.525469	No	PREDICTED: transmembrane protein DDB_G0273707/DDB_G0273361-like	Sesamum indicum	NA	NA	NA	NA	NA
TR38038|c0_g5_i1	41.0821	100.19	1.28615	0.0073752	0.593713	No	PREDICTED: uncharacterized protein LOC105163785	Sesamum indicum	NA	NA	NA	NA	NA
TR30635|c0_g1_i3	41.0821	100.19	1.28615	0.0073752	0.59441	No	NA	NA	NA	NA	NA	NA	NA
TR23376|c0_g3_i1	35.2132	85.8769	1.28615	0.00983002	0.652042	No	Two pore calcium channel protein 1A	Morus notabilis	NA	ion transmembrane transport[GO:0034220]	ion channel activity[GO:0005216]	integral component of membrane[GO:0016021]	NA
TR42400|c0_g3_i1	29.3443	71.5641	1.28615	0.0131951	0.717692	No	PREDICTED: ATP-dependent zinc metalloprotease FTSH 11, chloroplastic/mitochondrial isoform X1	Sesamum indicum	NA	NA	NA	NA	NA
TR35673|c0_g16_i1	29.3443	71.5641	1.28615	0.0131951	0.717123	No	NA	NA	NA	NA	NA	NA	NA
TR32974|c0_g4_i4	23.4755	57.2512	1.28615	0.0183428	0.802856	No	PREDICTED: heat shock 22 kDa protein, mitochondrial	Sesamum indicum	NA	NA	NA	NA	NA
TR36803|c0_g1_i4	23.4755	57.2512	1.28615	0.0183428	0.803369	No	PREDICTED: uncharacterized protein LOC105166581 isoform X1	Sesamum indicum	NA	NA	NA	NA	NA
TR41108|c0_g4_i4	23.4755	57.2512	1.28615	0.0183428	0.802344	No	PREDICTED: probable indole-3-acetic acid-amido synthetase GH3.5	Sesamum indicum	NA	NA	NA	NA	NA
TR13218|c0_g1_i1	11.7377	28.6256	1.28615	0.0198066	0.826828	No	PREDICTED: LOW QUALITY PROTEIN: uncharacterized protein LOC105171130	Sesamum indicum	NA	NA	NA	NA	NA
TR29940|c1_g2_i1	11.7377	28.6256	1.28615	0.0198066	0.822323	No	hypothetical protein CISIN_1g003044mg	Citrus sinensis	NA	carbohydrate metabolic process[GO:0005975]	beta-galactosidase activity[GO:0004565]	NA	map00511:Other glycan degradation(lactase (ambiguous)[ec:3.2.1.23]) ; map00604:Glycosphingolipid biosynthesis - ganglio series(lactase (ambiguous)[ec:3.2.1.23]) ; map00600:Sphingolipid metabolism(lactase (ambiguous)[ec:3.2.1.23]) ; map00531:Glycosaminoglycan degradation(lactase (ambiguous)[ec:3.2.1.23]) ; map00052:Galactose metabolism(lactase (ambiguous)[ec:3.2.1.23])
TR40002|c0_g2_i1	11.7377	28.6256	1.28615	0.0198066	0.822821	No	PREDICTED: riboflavin biosynthesis protein PYRD, chloroplastic	Sesamum indicum	NA	NA	NA	NA	NA
TR41429|c3_g3_i1	11.7377	28.6256	1.28615	0.0198066	0.82332	No	hypothetical protein MIMGU_mgv1a004418mg	Mimulus guttatus	NA	NA	NA	outer membrane[GO:0019867]	NA
TR44652|c0_g3_i3	11.7377	28.6256	1.28615	0.0198066	0.82482	No	PREDICTED: plasma membrane ATPase 4-like	Sesamum indicum	NA	NA	NA	NA	NA
TR7963|c0_g1_i4	11.7377	28.6256	1.28615	0.0198066	0.825321	No	PREDICTED: palmitoyl-protein thioesterase 1-like	Sesamum indicum	NA	NA	NA	NA	NA
TR17958|c0_g1_i1	11.7377	28.6256	1.28615	0.0198066	0.823819	No	PREDICTED: clustered mitochondria protein	Sesamum indicum	NA	NA	NA	NA	NA
TR42453|c0_g6_i1	11.7377	28.6256	1.28615	0.0198066	0.825823	No	NA	NA	NA	NA	NA	NA	NA
TR804|c0_g2_i1	11.7377	28.6256	1.28615	0.0198066	0.824319	No	NA	NA	NA	NA	NA	NA	NA
TR8240|c1_g1_i1	11.7377	28.6256	1.28615	0.0198066	0.826325	No	unnamed protein product	Coffea canephora	NA	NA	NA	NA	NA
TR14741|c0_g1_i1	17.6066	42.9384	1.28615	0.0233497	0.86055	No	hypothetical protein MIMGU_mgv1a009762mg	Mimulus guttatus	NA	protein phosphorylation[GO:0006468] ; signal transduction[GO:0007165]	protein kinase activity[GO:0004672] ; ATP binding[GO:0005524]	integral component of membrane[GO:0016021]	NA
TR35963|c0_g1_i1	17.6066	42.9384	1.28615	0.0233497	0.859165	No	PREDICTED: uncharacterized protein LOC105166884 isoform X2	Sesamum indicum	NA	NA	NA	NA	NA
TR41593|c0_g3_i1	17.6066	42.9384	1.28615	0.0233497	0.861013	No	PREDICTED: translation factor GUF1 homolog, chloroplastic	Sesamum indicum	NA	NA	NA	NA	NA
TR43457|c0_g6_i2	17.6066	42.9384	1.28615	0.0233497	0.860088	No	PREDICTED: LRR receptor-like serine/threonine-protein kinase HSL2	Sesamum indicum	NA	NA	NA	NA	NA
TR7998|c0_g2_i2	17.6066	42.9384	1.28615	0.0233497	0.859626	No	PREDICTED: probable galacturonosyltransferase-like 3	Sesamum indicum	NA	NA	NA	NA	NA
TR38754|c2_g1_i2	17.6066	42.9384	1.28615	0.0233497	0.858705	No	NA	NA	NA	NA	NA	NA	NA
TR40718|c1_g4_i1	17.6066	42.9384	1.28615	0.0233497	0.858244	No	hypothetical protein MIMGU_mgv1a012774mg	Mimulus guttatus	NA	NA	NA	NA	NA
TR40235|c0_g6_i6	17.6066	42.9384	1.28615	0.0233497	0.861476	No	PREDICTED: photosynthetic NDH subunit of subcomplex B 2, chloroplastic	Erythranthe guttatus	NA	NA	NA	NA	NA
TR27574|c0_g1_i1	131.071	318.971	1.28307	0.000676856	0.144172	No	PREDICTED: uncharacterized protein LOC105168700	Sesamum indicum	NA	NA	NA	NA	NA
TR32470|c0_g1_i5	170.197	413.027	1.27903	0.000483228	0.113504	No	diacylglycerol acyltransferase type 2	Olea europaea	NA	metabolic process[GO:0008152]	transferase activity, transferring acyl groups other than amino-acyl groups[GO:0016747]	integral component of membrane[GO:0016021]	NA
TR37263|c3_g3_i5	663.182	1609.17	1.27884	0.000299067	0.0820484	No	hypothetical protein MIMGU_mgv1a004346mg	Mimulus guttatus	NA	NA	NA	integral component of membrane[GO:0016021]	NA
TR31817|c1_g8_i2	48.9072	118.592	1.27789	0.00549111	0.522356	No	PREDICTED: uncharacterized protein LOC100814407	Glycine max	NA	NA	NA	NA	NA
TR2566|c0_g1_i3	91.9456	222.871	1.27736	0.00135584	0.234239	No	NA	NA	NA	NA	NA	NA	NA
TR2361|c2_g1_i3	1054.44	2555.86	1.27733	0.000514199	0.118347	No	GDS_OCIBARecName: Full=Germacrene-D synthase; AltName: Full=(-)-germacrene D synthase	Ocimum basilicum	Lamiaceae	metabolic process[GO:0008152]	metal ion binding[GO:0046872] ; lyase activity[GO:0016829]	NA	NA
TR26480|c0_g1_i2	43.0384	104.279	1.27675	0.00718334	0.59004	No	NA	NA	NA	NA	NA	NA	NA
TR33118|c0_g1_i1	383.433	928.288	1.2756	0.000258603	0.0761236	No	NA	NA	NA	NA	NA	NA	NA
TR37452|c0_g7_i2	37.1695	89.9662	1.27526	0.00958482	0.64577	No	HPPR_SOLSCRecName: Full=Hydroxyphenylpyruvate reductase; Short=HPPR	Plectranthus scutellarioides	Lamiaceae	oxidation-reduction process[GO:0055114]	NAD binding[GO:0051287] ; hydroxyphenylpyruvate reductase activity[GO:0047995]	NA	map00130:Ubiquinone and other terpenoid-quinone biosynthesis(reductase[ec:1.1.1.237]) ; map00350:Tyrosine metabolism(reductase[ec:1.1.1.237]) ; map00360:Phenylalanine metabolism(reductase[ec:1.1.1.237]) ; map00960:Tropane, piperidine and pyridine alkaloid biosynthesis(reductase[ec:1.1.1.237])
TR38038|c0_g2_i4	68.4701	165.62	1.27433	0.00274069	0.366425	No	PREDICTED: uncharacterized protein LOC105163785	Sesamum indicum	NA	NA	NA	NA	NA
TR42591|c0_g1_i1	31.3006	75.6534	1.27321	0.0129045	0.720163	No	PREDICTED: dnaJ protein ERDJ3A	Sesamum indicum	NA	NA	NA	NA	NA
TR36096|c0_g3_i5	88.033	212.647	1.27235	0.00156227	0.255122	No	hypothetical protein JCGZ_21766	Jatropha curcas	NA	NA	NA	NA	NA
TR43340|c0_g1_i1	25.4318	61.3406	1.27021	0.0179523	0.79541	No	PREDICTED: ribonuclease E/G-like protein, chloroplastic isoform X1	Erythranthe guttatus	NA	NA	NA	NA	NA
TR42502|c1_g1_i2	268.012	646.121	1.26951	0.000328302	0.089001	No	PREDICTED: linoleate 13S-lipoxygenase 2-1, chloroplastic-like	Sesamum indicum	NA	NA	NA	NA	NA
TR42591|c0_g1_i2	121.29	292.39	1.26944	0.000878384	0.172131	No	PREDICTED: dnaJ protein ERDJ3A	Sesamum indicum	NA	NA	NA	NA	NA
TR44813|c4_g1_i2	95.8582	231.05	1.26923	0.00134149	0.232345	No	PREDICTED: probable leucine-rich repeat receptor-like protein kinase At5g63930	Sesamum indicum	NA	NA	NA	NA	NA
TR42502|c1_g3_i7	166.285	400.759	1.26908	0.000552867	0.124326	No	hypothetical protein MIMGU_mgv1a000979mg	Mimulus guttatus	NA	oxylipin biosynthetic process[GO:0031408] ; oxidation-reduction process[GO:0055114]	metal ion binding[GO:0046872] ; oxidoreductase activity, acting on single donors with incorporation of molecular oxygen, incorporation of two atoms of oxygen[GO:0016702]	NA	NA
TR23105|c1_g1_i1	44.9947	108.368	1.26812	0.00698842	0.578184	No	PREDICTED: benzyl alcohol O-benzoyltransferase-like	Cucumis melo	NA	NA	NA	NA	NA
TR40516|c0_g1_i4	804.035	1936.32	1.26799	0.000399662	0.0989589	No	PREDICTED: stachyose synthase	Sesamum indicum	NA	NA	NA	NA	NA
TR38798|c0_g1_i1	84.1204	202.424	1.26685	0.00181932	0.27791	No	hypothetical protein MIMGU_mgv1a004614mg	Mimulus guttatus	NA	metabolic process[GO:0008152]	hydrolase activity, acting on ester bonds[GO:0016788]	NA	NA
TR25093|c1_g3_i1	266.055	639.987	1.26632	0.000341792	0.0901634	No	glycine-rich protein 1	Boea hygrometrica	NA	NA	NA	NA	NA
TR44808|c1_g1_i1	19.5629	47.0278	1.26539	0.0244693	0.860656	No	PREDICTED: uncharacterized protein LOC105163648	Sesamum indicum	NA	NA	NA	NA	NA
TR31490|c0_g1_i4	19.5629	47.0278	1.26539	0.0244693	0.861097	No	PREDICTED: glutathione S-transferase U17-like	Sesamum indicum	NA	NA	NA	NA	NA
TR33182|c1_g3_i5	19.5629	47.0278	1.26539	0.0244693	0.860215	No	unnamed protein product	Coffea canephora	NA	NA	NA	NA	NA
TR38469|c4_g1_i7	72.3827	173.798	1.2637	0.00264176	0.359505	No	NA	NA	NA	NA	NA	NA	NA
TR7583|c2_g1_i7	66.5138	159.486	1.2617	0.00325582	0.393839	No	PREDICTED: protein TIFY 10A-like isoform X1	Sesamum indicum	NA	NA	NA	NA	NA
TR42502|c1_g3_i1	2922.7	7007.14	1.26153	0.00385557	0.439273	No	PREDICTED: linoleate 13S-lipoxygenase 2-1, chloroplastic-like	Sesamum indicum	NA	NA	NA	NA	NA
TR43953|c5_g9_i3	193.673	464.144	1.26095	0.000496267	0.114991	No	PREDICTED: subtilisin-like protease SDD1	Sesamum indicum	NA	NA	NA	NA	NA
TR4095|c0_g2_i1	46.9509	112.458	1.26016	0.00679419	0.564156	No	PREDICTED: transcription factor MYC2	Sesamum indicum	NA	NA	NA	NA	NA
TR30451|c0_g2_i2	109.552	261.72	1.25641	0.00118255	0.211769	No	PREDICTED: 14 kDa proline-rich protein DC2.15-like	Erythranthe guttatus	NA	NA	NA	NA	NA
TR20605|c0_g1_i1	54.7761	130.86	1.25641	0.00511271	0.502386	No	NA	NA	NA	NA	NA	NA	NA
TR32144|c0_g3_i1	41.0821	98.145	1.25641	0.00904024	0.627574	No	PREDICTED: uncharacterized protein LOC105169352	Sesamum indicum	NA	NA	NA	NA	NA
TR44813|c4_g7_i2	41.0821	98.145	1.25641	0.00904024	0.62821	No	PREDICTED: probable leucine-rich repeat receptor-like protein kinase At5g63930	Sesamum indicum	NA	NA	NA	NA	NA
TR35653|c0_g1_i1	27.388	65.43	1.25641	0.0174267	0.788943	No	PREDICTED: LOW QUALITY PROTEIN: butyrate--CoA ligase AAE11, peroxisomal-like	Sesamum indicum	NA	NA	NA	NA	NA
TR41968|c0_g10_i1	27.388	65.43	1.25641	0.0174267	0.790508	No	PREDICTED: argininosuccinate lyase, chloroplastic isoform X2	Sesamum indicum	NA	NA	NA	NA	NA
TR33044|c0_g1_i4	27.388	65.43	1.25641	0.0174267	0.789986	No	NA	NA	NA	NA	NA	NA	NA
TR37306|c0_g1_i1	27.388	65.43	1.25641	0.0174267	0.788422	No	PREDICTED: translin-associated protein X-like	Sesamum indicum	NA	NA	NA	NA	NA
TR39234|c0_g2_i1	27.388	65.43	1.25641	0.0174267	0.789464	No	Os08g0382400, partial	Oryza sativa Japonica Group	NA	NA	NA	NA	NA
TR37412|c0_g1_i1	13.694	32.715	1.25641	0.0253093	0.867512	No	PREDICTED: ocs element-binding factor 1	Sesamum indicum	NA	NA	NA	NA	NA
TR38313|c0_g5_i3	13.694	32.715	1.25641	0.0253093	0.866646	No	NA	NA	NA	NA	NA	NA	NA
TR39587|c0_g4_i1	13.694	32.715	1.25641	0.0253093	0.867946	No	zinc finger protein	Medicago truncatula	NA	NA	zinc ion binding[GO:0008270]	integral component of membrane[GO:0016021]	NA
TR41366|c0_g2_i1	13.694	32.715	1.25641	0.0253093	0.86838	No	hypothetical protein MIMGU_mgv1a001471mg	Mimulus guttatus	NA	NA	ATP binding[GO:0005524]	NA	NA
TR41700|c1_g4_i1	13.694	32.715	1.25641	0.0253093	0.868815	No	PREDICTED: BRCA1-associated protein	Sesamum indicum	NA	NA	NA	NA	NA
TR43164|c5_g1_i1	13.694	32.715	1.25641	0.0253093	0.86925	No	NA	NA	NA	NA	NA	NA	NA
TR33627|c1_g1_i1	13.694	32.715	1.25641	0.0253093	0.869685	No	NA	NA	NA	NA	NA	NA	NA
TR39954|c0_g2_i2	13.694	32.715	1.25641	0.0253093	0.870121	No	NA	NA	NA	NA	NA	NA	NA
TR42400|c0_g4_i1	13.694	32.715	1.25641	0.0253093	0.870558	No	PREDICTED: ATP-dependent zinc metalloprotease FTSH 11, chloroplastic/mitochondrial isoform X2	Sesamum indicum	NA	NA	NA	NA	NA
TR32179|c0_g3_i2	13.694	32.715	1.25641	0.0253093	0.866213	No	hypothetical protein MIMGU_mgv1a013866mg	Mimulus guttatus	NA	NA	NA	NA	NA
TR44083|c0_g3_i1	13.694	32.715	1.25641	0.0253093	0.867079	No	PREDICTED: pentatricopeptide repeat-containing protein At3g02490, mitochondrial	Sesamum indicum	NA	NA	NA	NA	NA
TR3099|c0_g1_i4	674.92	1611.21	1.25536	0.00038442	0.0958771	No	PREDICTED: protein GAST1-like	Sesamum indicum	NA	NA	NA	NA	NA
TR30560|c2_g2_i4	62.6013	149.262	1.25359	0.00397292	0.440924	No	hypothetical protein MIMGU_mgv1a000542mg	Mimulus guttatus	NA	protein phosphorylation[GO:0006468]	ATP binding[GO:0005524] ; protein serine/threonine kinase activity[GO:0004674]	integral component of membrane[GO:0016021]	NA
TR37895|c0_g1_i2	168.241	400.759	1.25221	0.000647936	0.139748	No	hypothetical protein MIMGU_mgv1a003718mg	Mimulus guttatus	NA	metabolic process[GO:0008152]	catalytic activity[GO:0003824]	NA	NA
TR28790|c0_g1_i2	35.2132	83.8322	1.25139	0.0122552	0.704569	No	PREDICTED: uncharacterized protein LOC104084761	Nicotiana tomentosiformis	NA	NA	NA	NA	NA
TR38742|c0_g3_i1	35.2132	83.8322	1.25139	0.0122552	0.703979	No	PREDICTED: ribose-phosphate pyrophosphokinase 4	Sesamum indicum	NA	NA	NA	NA	NA
TR41023|c0_g2_i2	21.5192	51.1172	1.24819	0.02463	0.861446	No	PREDICTED: phospholipase SGR2-like isoform X1	Sesamum indicum	NA	NA	NA	NA	NA
TR7973|c0_g1_i1	21.5192	51.1172	1.24819	0.02463	0.861006	No	PREDICTED: omega-3 fatty acid desaturase, chloroplastic	Sesamum indicum	NA	NA	NA	NA	NA
TR23048|c0_g1_i1	72.3827	171.754	1.24662	0.00305832	0.391345	No	hypothetical protein POPTR_0004s08350g, partial	Populus trichocarpa	NA	NA	NA	NA	NA
TR39127|c1_g2_i1	123.246	292.39	1.24635	0.00107275	0.197786	No	hypothetical protein MIMGU_mgv11b022665mg	Mimulus guttatus	NA	oxidation-reduction process[GO:0055114]	oxidoreductase activity[GO:0016491]	NA	NA
TR18417|c0_g1_i1	101.727	241.273	1.24596	0.00148746	0.247022	No	hypothetical protein MIMGU_mgv1a003614mg	Mimulus guttatus	NA	protein folding[GO:0006457]	NA	NA	NA
TR28357|c2_g1_i1	50.8635	120.637	1.24596	0.00641819	0.550255	No	12-oxophytodienoate reductase	Isodon eriocalyx	Lamiaceae	oxidation-reduction process[GO:0055114]	oxidoreductase activity[GO:0016491] ; FMN binding[GO:0010181]	NA	NA
TR18521|c0_g1_i1	29.3443	69.5194	1.24433	0.01686	0.785581	No	PREDICTED: zinc finger A20 and AN1 domain-containing stress-associated protein 5	Sesamum indicum	NA	NA	NA	NA	NA
TR33735|c2_g1_i2	74.339	175.843	1.2421	0.00299481	0.385375	No	NA	NA	NA	NA	NA	NA	NA
TR38425|c0_g1_i3	37.1695	87.9216	1.2421	0.0118731	0.696018	No	PREDICTED: uncharacterized protein LOC104089941	Nicotiana tomentosiformis	NA	NA	NA	NA	NA
TR44269|c0_g2_i5	37.1695	87.9216	1.2421	0.0118731	0.696613	No	PREDICTED: subtilisin-like protease	Malus domestica	NA	NA	NA	NA	NA
TR39548|c0_g3_i1	44.9947	106.324	1.24064	0.00847729	0.616577	No	PREDICTED: uncharacterized protein LOC105169457	Sesamum indicum	NA	NA	NA	NA	NA
TR30782|c1_g1_i4	44.9947	106.324	1.24064	0.00847729	0.617231	No	NA	NA	NA	NA	NA	NA	NA
TR33175|c0_g3_i1	52.8198	124.726	1.23961	0.00623993	0.541745	No	PREDICTED: peptidyl-prolyl cis-trans isomerase FKBP16-4, chloroplastic	Sesamum indicum	NA	NA	NA	NA	NA
TR7979|c0_g2_i1	271.924	642.032	1.23944	0.000448704	0.107983	No	PREDICTED: peptidyl-prolyl cis-trans isomerase FKBP62-like	Sesamum indicum	NA	NA	NA	NA	NA
TR7910|c0_g2_i8	279.749	660.434	1.23928	0.000440472	0.106376	No	PREDICTED: glutamate--glyoxylate aminotransferase 2	Sesamum indicum	NA	NA	NA	NA	NA
TR37065|c3_g1_i3	516.46	1216.59	1.23611	0.000401909	0.0991573	No	PREDICTED: cytochrome P450 CYP72A219-like	Sesamum indicum	NA	NA	NA	NA	NA
TR3571|c1_g1_i4	224.973	529.574	1.23508	0.000553329	0.124023	No	hypothetical protein MIMGU_mgv1a011768mg	Mimulus guttatus	NA	catabolic process[GO:0009056] ; macromolecule metabolic process[GO:0043170]	NA	NA	NA
TR2092|c0_g1_i1	156.503	368.044	1.23369	0.000859619	0.170401	No	PREDICTED: vestitone reductase-like	Sesamum indicum	NA	NA	NA	NA	NA
TR37440|c0_g1_i2	46.9509	110.413	1.23369	0.00820198	0.612799	No	NA	NA	NA	NA	NA	NA	NA
TR44133|c1_g7_i1	39.1258	92.0109	1.23369	0.0114741	0.683135	No	PREDICTED: glycerophosphodiester phosphodiesterase GDPDL3-like	Sesamum indicum	NA	NA	NA	NA	NA
TR44609|c8_g8_i3	39.1258	92.0109	1.23369	0.0114741	0.683729	No	Uncharacterized protein TCM_042921	Theobroma cacao	NA	NA	NA	NA	NA
TR30560|c2_g6_i1	31.3006	73.6087	1.23369	0.0163131	0.776992	No	PREDICTED: probable LRR receptor-like serine/threonine-protein kinase At3g47570	Sesamum indicum	NA	NA	NA	NA	NA
TR40122|c0_g2_i3	31.3006	73.6087	1.23369	0.0163131	0.777532	No	hypothetical protein MIMGU_mgv1a005734mg	Mimulus guttatus	NA	NA	NA	NA	NA
TR28856|c0_g1_i9	23.4755	55.2066	1.23369	0.0241878	0.85868	No	hypothetical protein CARUB_v10003541mg	Capsella rubella	NA	protein phosphorylation[GO:0006468]	protein kinase activity[GO:0004672] ; ATP binding[GO:0005524]	NA	NA
TR35734|c0_g3_i2	23.4755	55.2066	1.23369	0.0241878	0.860016	No	PREDICTED: uncharacterized protein LOC105177167	Sesamum indicum	NA	NA	NA	NA	NA
TR41316|c0_g2_i1	23.4755	55.2066	1.23369	0.0241878	0.85957	No	hypothetical protein CISIN_1g0082821mg, partial	Citrus sinensis	NA	SRP-dependent cotranslational protein targeting to membrane[GO:0006614]	GTP binding[GO:0005525]	intracellular[GO:0005622]	NA
TR40219|c0_g1_i5	23.4755	55.2066	1.23369	0.0241878	0.859125	No	hypothetical protein MIMGU_mgv1a004503mg	Mimulus guttatus	NA	phosphate-containing compound metabolic process[GO:0006796]	catalytic activity[GO:0003824]	NA	NA
TR19720|c0_g1_i1	15.6503	36.8044	1.23369	0.0294827	0.92546	No	PREDICTED: arabinogalactan peptide 3-like	Nelumbo nucifera	NA	NA	NA	NA	NA
TR2095|c0_g1_i1	15.6503	36.8044	1.23369	0.0294827	0.923769	No	PREDICTED: ABC transporter E family member 2	Sesamum indicum	NA	NA	NA	NA	NA
TR36964|c2_g5_i1	15.6503	36.8044	1.23369	0.0294827	0.922926	No	PREDICTED: carboxymethylenebutenolidase homolog	Sesamum indicum	NA	NA	NA	NA	NA
TR43251|c0_g4_i1	15.6503	36.8044	1.23369	0.0294827	0.924614	No	PREDICTED: probable serine/threonine-protein kinase abkC isoform X2	Sesamum indicum	NA	NA	NA	NA	NA
TR34287|c2_g6_i1	15.6503	36.8044	1.23369	0.0294827	0.925037	No	hypothetical protein SOVF_136810	Spinacia oleracea	NA	pectin catabolic process[GO:0045490]	metal ion binding[GO:0046872] ; pectate lyase activity[GO:0030570]	NA	map00040:Pentose and glucuronate interconversions(lyase[ec:4.2.2.2])
TR41116|c0_g4_i1	15.6503	36.8044	1.23369	0.0294827	0.924191	No	PREDICTED: uncharacterized protein LOC105158762	Sesamum indicum	NA	NA	NA	NA	NA
TR35394|c0_g5_i1	15.6503	36.8044	1.23369	0.0294827	0.923347	No	NA	NA	NA	NA	NA	NA	NA
TR26627|c0_g1_i1	48.9072	114.502	1.22726	0.00793504	0.61082	No	NA	NA	NA	NA	NA	NA	NA
TR25782|c0_g1_i2	33.2569	77.6981	1.22423	0.0158036	0.775892	No	PREDICTED: uncharacterized protein LOC105169808	Sesamum indicum	NA	NA	NA	NA	NA
TR35347|c1_g2_i10	33.2569	77.6981	1.22423	0.0158036	0.775337	No	hypothetical protein MIMGU_mgv1a012962mg	Mimulus guttatus	NA	nucleoside diphosphate phosphorylation[GO:0006165] ; UTP biosynthetic process[GO:0006228] ; GTP biosynthetic process[GO:0006183] ; CTP biosynthetic process[GO:0006241]	nucleoside diphosphate kinase activity[GO:0004550] ; ATP binding[GO:0005524]	NA	map01130:Biosynthesis of antibiotics(kinase[ec:2.7.4.6]) ; map00240:Pyrimidine metabolism(kinase[ec:2.7.4.6]) ; map00230:Purine metabolism(kinase[ec:2.7.4.6])
TR37732|c0_g2_i2	33.2569	77.6981	1.22423	0.0158036	0.773677	No	PREDICTED: glutamine synthetase cytosolic isozyme 2	Sesamum indicum	NA	NA	NA	NA	NA
TR40507|c1_g1_i4	33.2569	77.6981	1.22423	0.0158036	0.776448	No	Coiled-coil domain-containing protein 109A, putative	Theobroma cacao	NA	NA	NA	integral component of membrane[GO:0016021]	NA
TR42424|c0_g3_i8	33.2569	77.6981	1.22423	0.0158036	0.77423	No	NA	NA	NA	NA	NA	NA	NA
TR44256|c1_g2_i1	33.2569	77.6981	1.22423	0.0158036	0.774783	No	PREDICTED: chaperone protein ClpB1	Sesamum indicum	NA	NA	NA	NA	NA
TR34229|c2_g3_i2	58.6887	136.994	1.22296	0.00575532	0.530564	No	PREDICTED: uncharacterized protein LOC105173886	Sesamum indicum	NA	NA	NA	NA	NA
TR32201|c0_g7_i1	25.4318	59.2959	1.2213	0.0234096	0.858608	No	hypothetical protein MIMGU_mgv1a013752mg	Mimulus guttatus	NA	NA	NA	integral component of membrane[GO:0016021]	NA
TR27538|c0_g3_i3	25.4318	59.2959	1.2213	0.0234096	0.858149	No	PREDICTED: probable LRR receptor-like serine/threonine-protein kinase At3g47570	Erythranthe guttatus	NA	NA	NA	NA	NA
TR40068|c4_g3_i2	25.4318	59.2959	1.2213	0.0234096	0.859068	No	PREDICTED: benzyl alcohol O-benzoyltransferase-like isoform X2	Nicotiana sylvestris	NA	NA	NA	NA	NA
TR37149|c1_g3_i5	43.0384	100.19	1.21904	0.0106672	0.676184	No	PREDICTED: probable GTP diphosphokinase RSH2, chloroplastic isoform X2	Sesamum indicum	NA	NA	NA	NA	NA
TR40373|c0_g1_i2	43.0384	100.19	1.21904	0.0106672	0.67681	No	PREDICTED: uncharacterized protein LOC105172852	Sesamum indicum	NA	NA	NA	NA	NA
TR41319|c1_g1_i3	275.837	642.032	1.21883	0.00055234	0.124616	No	PREDICTED: probable indole-3-acetic acid-amido synthetase GH3.5 isoform X3	Nelumbo nucifera	NA	NA	NA	NA	NA
TR44818|c4_g3_i2	60.645	141.083	1.21809	0.00560494	0.524456	No	Binding isoform 1	Theobroma cacao	NA	anisotropic cell growth[GO:0051211] ; cellulose biosynthetic process[GO:0030244] ; plant-type cell wall biogenesis[GO:0009832]	NA	cytoplasm[GO:0005737] ; plasmodesma[GO:0009506] ; plasma membrane[GO:0005886]	NA
TR40433|c1_g1_i7	260.186	605.227	1.21793	0.000582359	0.128846	No	PREDICTED: protein NRT1/ PTR FAMILY 5.10-like	Sesamum indicum	NA	NA	NA	NA	NA
TR2361|c2_g1_i8	530.154	1232.95	1.21763	0.00049025	0.11476	No	PREDICTED: LOW QUALITY PROTEIN: beta-caryophyllene synthase-like	Sesamum indicum	NA	NA	NA	NA	NA
TR37781|c0_g1_i2	287.575	668.613	1.21724	0.000546098	0.123615	No	PREDICTED: uncharacterized protein LOC105174142	Sesamum indicum	NA	NA	NA	NA	NA
TR42502|c1_g4_i1	88.033	204.469	1.21576	0.00261063	0.357396	No	hypothetical protein MIMGU_mgv1a000979mg	Mimulus guttatus	NA	oxylipin biosynthetic process[GO:0031408] ; oxidation-reduction process[GO:0055114]	metal ion binding[GO:0046872] ; oxidoreductase activity, acting on single donors with incorporation of molecular oxygen, incorporation of two atoms of oxygen[GO:0016702]	NA	NA
TR29156|c0_g1_i4	35.2132	81.7875	1.21576	0.0152589	0.762244	No	hypothetical protein MIMGU_mgv1a004155mg	Mimulus guttatus	NA	NA	NA	membrane[GO:0016020]	NA
TR33966|c1_g3_i2	17.6066	40.8937	1.21576	0.0319664	0.931385	No	PREDICTED: probable serine/threonine-protein kinase drkD	Sesamum indicum	NA	NA	NA	NA	NA
TR34808|c1_g1_i1	17.6066	40.8937	1.21576	0.0319664	0.931781	No	NA	NA	NA	NA	NA	NA	NA
TR38774|c4_g2_i1	17.6066	40.8937	1.21576	0.0319664	0.93297	No	hypothetical protein MIMGU_mgv1a014765mg	Mimulus guttatus	NA	NA	NA	NA	NA
TR34289|c0_g1_i1	17.6066	40.8937	1.21576	0.0319664	0.934163	No	NA	NA	NA	NA	NA	NA	NA
TR36833|c0_g2_i1	17.6066	40.8937	1.21576	0.0319664	0.933765	No	PREDICTED: uncharacterized protein LOC105953301	Erythranthe guttatus	NA	NA	NA	NA	NA
TR40769|c0_g2_i2	17.6066	40.8937	1.21576	0.0319664	0.933367	No	NA	NA	NA	NA	NA	NA	NA
TR42595|c0_g6_i2	17.6066	40.8937	1.21576	0.0319664	0.932177	No	PREDICTED: mechanosensitive ion channel protein 2, chloroplastic-like	Sesamum indicum	NA	NA	NA	NA	NA
TR43260|c1_g2_i3	17.6066	40.8937	1.21576	0.0319664	0.932573	No	NA	NA	NA	NA	NA	NA	NA
TR43260|c1_g1_i6	125.203	290.346	1.21351	0.00143515	0.242446	No	NA	NA	NA	NA	NA	NA	NA
TR44176|c1_g2_i2	62.6013	145.173	1.21351	0.00545376	0.520246	No	PREDICTED: receptor-like protein kinase THESEUS 1	Sesamum indicum	NA	NA	NA	NA	NA
TR38038|c0_g2_i5	72.3827	167.664	1.21186	0.00409322	0.449187	No	NA	NA	NA	NA	NA	NA	NA
TR28036|c0_g2_i4	99.7708	231.05	1.21151	0.00211872	0.314539	No	PREDICTED: uncharacterized protein LOC105167003 isoform X1	Sesamum indicum	NA	NA	NA	NA	NA
TR38918|c0_g1_i1	54.7761	126.771	1.2106	0.00720143	0.590113	No	PREDICTED: uncharacterized protein LOC105159738 isoform X1	Sesamum indicum	NA	NA	NA	NA	NA
TR41663|c2_g7_i2	27.388	63.3853	1.2106	0.0224803	0.857064	No	PREDICTED: ruBisCO large subunit-binding protein subunit beta, chloroplastic	Sesamum indicum	NA	NA	NA	NA	NA
TR7979|c0_g1_i4	156.503	361.91	1.20944	0.00109351	0.198941	No	PREDICTED: peptidyl-prolyl cis-trans isomerase FKBP62-like	Sesamum indicum	NA	NA	NA	NA	NA
TR32035|c0_g2_i2	377.564	873.082	1.2094	0.00052551	0.119745	No	transferase, putative	Ricinus communis	NA	NA	transferase activity, transferring acyl groups other than amino-acyl groups[GO:0016747]	NA	NA
TR2741|c1_g1_i1	279.749	646.121	1.20767	0.000614809	0.134293	No	PREDICTED: flavanone 3-dioxygenase-like	Sesamum indicum	NA	NA	NA	NA	NA
TR36913|c1_g3_i6	84.1204	194.245	1.20735	0.00309053	0.393997	No	NA	NA	NA	NA	NA	NA	NA
TR38776|c0_g2_i6	199.542	460.055	1.20512	0.000854419	0.172359	No	cytochrome P450 CYP94C54	Salvia miltiorrhiza	NA	oxidation-reduction process[GO:0055114]	heme binding[GO:0020037] ; oxidoreductase activity, acting on paired donors, with incorporation or reduction of molecular oxygen[GO:0016705] ; monooxygenase activity[GO:0004497] ; iron ion binding[GO:0005506]	NA	NA
TR24798|c0_g2_i1	524.286	1206.37	1.20224	0.000571335	0.127228	No	NA	NA	NA	NA	NA	NA	NA
TR43598|c1_g2_i1	39.1258	89.9662	1.20126	0.0141114	0.738825	No	hypothetical protein MIMGU_mgv1a005541mg	Mimulus guttatus	NA	arginyl-tRNA aminoacylation[GO:0006420] ; glycyl-tRNA aminoacylation[GO:0006426]	ATP binding[GO:0005524] ; arginine-tRNA ligase activity[GO:0004814] ; glycine-tRNA ligase activity[GO:0004820]	cytoplasm[GO:0005737]	map00970:Aminoacyl-tRNA biosynthesis(ligase[ec:6.1.1.19]) ; map00970:Aminoacyl-tRNA biosynthesis(ligase[ec:6.1.1.14])
TR2599|c1_g1_i1	29.3443	67.4747	1.20126	0.0215214	0.84638	No	uncharacterized protein LOC100499823	Glycine max	NA	NA	heme binding[GO:0020037] ; metal ion binding[GO:0046872]	integral component of membrane[GO:0016021]	NA
TR40304|c1_g2_i2	29.3443	67.4747	1.20126	0.0215214	0.84541	No	PREDICTED: crocetin glucosyltransferase, chloroplastic-like	Sesamum indicum	NA	NA	NA	NA	NA
TR42627|c0_g2_i1	29.3443	67.4747	1.20126	0.0215214	0.845895	No	NA	NA	NA	NA	NA	NA	NA
TR22599|c0_g1_i1	19.5629	44.9831	1.20126	0.0330057	0.941272	No	NA	NA	NA	NA	NA	NA	NA
TR32369|c0_g3_i1	19.5629	44.9831	1.20126	0.0330057	0.941664	No	hypothetical protein VITISV_018472	Vitis vinifera	NA	protein transport[GO:0015031]	NA	integral component of membrane[GO:0016021]	NA
TR37219|c2_g2_i5	19.5629	44.9831	1.20126	0.0330057	0.94284	No	unknown	Zea mays	NA	metabolic process[GO:0008152]	hydrolase activity[GO:0016787]	NA	NA
TR44140|c1_g4_i1	19.5629	44.9831	1.20126	0.0330057	0.943233	No	PREDICTED: uncharacterized protein LOC105951920 isoform X3	Erythranthe guttatus	NA	NA	NA	NA	NA
TR27848|c0_g4_i1	19.5629	44.9831	1.20126	0.0330057	0.942448	No	hypothetical protein MIMGU_mgv1a015360mg	Mimulus guttatus	NA	NA	NA	NA	NA
TR34673|c2_g1_i5	19.5629	44.9831	1.20126	0.0330057	0.942056	No	unknown	Medicago truncatula	NA	fatty acid biosynthetic process[GO:0006633]	transferase activity, transferring acyl groups other than amino-acyl groups[GO:0016747]	membrane[GO:0016020]	NA
TR38261|c0_g1_i1	19.5629	44.9831	1.20126	0.0330057	0.943626	No	PREDICTED: probable trehalase	Sesamum indicum	NA	NA	NA	NA	NA
TR13758|c0_g1_i1	9.78145	22.4916	1.20126	0.0371702	0.963855	No	NA	NA	NA	NA	NA	NA	NA
TR29673|c0_g3_i1	9.78145	22.4916	1.20126	0.0371702	0.962399	No	PREDICTED: uncharacterized protein LOC105164311	Sesamum indicum	NA	NA	NA	NA	NA
TR3038|c0_g1_i3	9.78145	22.4916	1.20126	0.0371702	0.962763	No	PREDICTED: homeobox-leucine zipper protein HAT4-like	Sesamum indicum	NA	NA	NA	NA	NA
TR41237|c0_g2_i1	9.78145	22.4916	1.20126	0.0371702	0.96349	No	PREDICTED: uncharacterized protein LOC105161170	Sesamum indicum	NA	NA	NA	NA	NA
TR41608|c0_g1_i4	9.78145	22.4916	1.20126	0.0371702	0.963126	No	PREDICTED: cAMP-regulated phosphoprotein 21-like	Sesamum indicum	NA	NA	NA	NA	NA
TR52907|c0_g1_i1	9.78145	22.4916	1.20126	0.0371702	0.964219	No	tom1 protein	Nicotiana benthamiana	NA	NA	NA	integral component of membrane[GO:0016021]	NA
TR7979|c0_g2_i2	485.16	1114.35	1.19968	0.000575975	0.127846	No	PREDICTED: peptidyl-prolyl cis-trans isomerase FKBP62-like	Sesamum indicum	NA	NA	NA	NA	NA
TR38356|c0_g4_i3	138.897	318.971	1.19942	0.00141345	0.240556	No	PREDICTED: uncharacterized protein LOC105160330	Sesamum indicum	NA	NA	NA	NA	NA
TR3036|c1_g2_i6	60.645	139.039	1.19703	0.00657911	0.556401	No	hypothetical protein MIMGU_mgv1a001772mg	Mimulus guttatus	NA	lipid metabolic process[GO:0006629]	glycerophosphodiester phosphodiesterase activity[GO:0008889]	integral component of membrane[GO:0016021]	map00564:Glycerophospholipid metabolism(phosphodiesterase[ec:3.1.4.46])
TR7751|c0_g1_i1	50.8635	116.547	1.19621	0.00917924	0.630838	No	NA	NA	NA	NA	NA	NA	NA
TR40796|c0_g5_i7	50.8635	116.547	1.19621	0.00917924	0.631471	No	hypothetical protein MIMGU_mgv1a021941mg	Mimulus guttatus	NA	glycerolipid biosynthetic process[GO:0045017]	diacylglycerol O-acyltransferase activity[GO:0004144]	NA	map00073:Cutin, suberine and wax biosynthesis(O-acyltransferase[ec:2.3.1.20]) ; map00561:Glycerolipid metabolism(O-acyltransferase[ec:2.3.1.20])
TR39127|c1_g1_i5	31.3006	71.5641	1.19304	0.020609	0.834421	No	unnamed protein product	Coffea canephora	NA	oxidation-reduction process[GO:0055114]	oxidoreductase activity[GO:0016491]	NA	NA
TR40198|c0_g1_i1	31.3006	71.5641	1.19304	0.020609	0.834914	No	PREDICTED: IAA-amino acid hydrolase ILR1-like 6	Sesamum indicum	NA	NA	NA	NA	NA
TR35837|c0_g1_i1	1672.63	3823.57	1.1928	0.00213603	0.316423	No	PREDICTED: isocitrate dehydrogenase [NADP] isoform X1	Sesamum indicum	NA	NA	NA	NA	NA
TR33058|c1_g2_i6	64.5575	147.217	1.18929	0.00619034	0.540863	No	hypothetical protein MIMGU_mgv1a014272mg	Mimulus guttatus	NA	NA	NA	NA	NA
TR36966|c0_g2_i3	43.0384	98.145	1.18929	0.0129783	0.720765	No	hypothetical protein MIMGU_mgv1a019822mg, partial	Mimulus guttatus	NA	NA	ATP binding[GO:0005524]	NA	NA
TR37650|c2_g1_i3	43.0384	98.145	1.18929	0.0129783	0.721349	No	PREDICTED: protein ROOT HAIR DEFECTIVE 3 homolog 2 isoform X1	Sesamum indicum	NA	NA	NA	NA	NA
TR37974|c1_g1_i5	43.0384	98.145	1.18929	0.0129783	0.720182	No	cytochrome P450 CYP85A1	Salvia miltiorrhiza	NA	oxidation-reduction process[GO:0055114]	heme binding[GO:0020037] ; oxidoreductase activity, acting on paired donors, with incorporation or reduction of molecular oxygen[GO:0016705] ; monooxygenase activity[GO:0004497] ; iron ion binding[GO:0005506]	NA	NA
TR40993|c0_g2_i1	21.5192	49.0725	1.18929	0.0327945	0.940334	No	NA	NA	NA	NA	NA	NA	NA
TR42951|c2_g9_i1	21.5192	49.0725	1.18929	0.0327945	0.940727	No	PREDICTED: probable NOT transcription complex subunit VIP2 isoform X1	Erythranthe guttatus	NA	NA	NA	NA	NA
TR32032|c1_g1_i6	207.367	472.323	1.18759	0.000979208	0.188126	No	PREDICTED: glycine-rich cell wall structural protein 1.8-like	Sesamum indicum	NA	NA	NA	NA	NA
TR32075|c1_g1_i1	54.7761	124.726	1.18714	0.00853869	0.620384	No	5GT2_PERFRRecName: Full=Anthocyanidin 3-O-glucoside 5-O-glucosyltransferase 2; AltName: Full=UDP-glucose:anthocyanin 5-O-glucosyltransferase 3R6; Short=p3R6; Flags: Precursor	Perilla frutescens	Lamiaceae	anthocyanin-containing compound biosynthetic process[GO:0009718]	transferase activity, transferring hexosyl groups[GO:0016758]	NA	NA
TR38928|c0_g1_i7	142.809	325.105	1.18682	0.00153511	0.251285	No	NA	NA	NA	NA	NA	NA	NA
TR39930|c1_g1_i3	33.2569	75.6534	1.18575	0.0197848	0.82793	No	hypothetical protein MIMGU_mgv1a0012782mg, partial	Mimulus guttatus	NA	potassium ion transmembrane transport[GO:0071805]	potassium ion transmembrane transporter activity[GO:0015079]	integral component of membrane[GO:0016021]	NA
TR43123|c0_g1_i1	33.2569	75.6534	1.18575	0.0197848	0.826921	No	PREDICTED: peptidyl-prolyl cis-trans isomerase FKBP62-like	Nicotiana sylvestris	NA	NA	NA	NA	NA
TR34919|c0_g1_i1	33.2569	75.6534	1.18575	0.0197848	0.827425	No	PREDICTED: ELMO domain-containing protein C isoform X2	Sesamum indicum	NA	NA	NA	NA	NA
TR40316|c0_g2_i6	33.2569	75.6534	1.18575	0.0197848	0.826418	No	UDP-N-acetylglucosamine--dolichyl-phosphate N-acetylglucosaminephosphotransferase-like	Solanum tuberosum	NA	metabolic process[GO:0008152]	UDP-N-acetylglucosamine-dolichyl-phosphate N-acetylglucosaminephosphotransferase activity[GO:0003975] ; phospho-N-acetylmuramoyl-pentapeptide-transferase activity[GO:0008963]	integral component of membrane[GO:0016021]	map00510:N-Glycan biosynthesis(N-acetylglucosaminephosphotransferase[ec:2.7.8.15]) ; map00550:Peptidoglycan biosynthesis(MraY transferase[ec:2.7.8.13])
TR41319|c1_g1_i1	33.2569	75.6534	1.18575	0.0197848	0.828436	No	PREDICTED: probable indole-3-acetic acid-amido synthetase GH3.5	Nicotiana sylvestris	NA	NA	NA	NA	NA
TR40433|c1_g1_i2	792.297	1801.37	1.18498	0.000870994	0.171172	No	hypothetical protein MIMGU_mgv1a004125mg	Mimulus guttatus	NA	NA	NA	membrane[GO:0016020]	NA
TR33118|c0_g1_i3	44.9947	102.234	1.18405	0.0124377	0.707939	No	putative expansin	Capsicum annuum	NA	plant-type cell wall organization[GO:0009664]	NA	extracellular region[GO:0005576] ; cell wall[GO:0005618] ; membrane[GO:0016020]	NA
TR35020|c0_g3_i7	44.9947	102.234	1.18405	0.0124377	0.709116	No	PREDICTED: peptidyl-prolyl cis-trans isomerase FKBP18, chloroplastic	Nicotiana sylvestris	NA	NA	NA	NA	NA
TR42086|c4_g4_i3	44.9947	102.234	1.18405	0.0124377	0.708527	No	PREDICTED: UPF0481 protein At3g47200-like	Sesamum indicum	NA	NA	NA	NA	NA
TR3119|c2_g1_i2	44.9947	102.234	1.18405	0.0124377	0.706766	No	NA	NA	NA	NA	NA	NA	NA
TR21171|c0_g1_i1	44.9947	102.234	1.18405	0.0124377	0.707352	No	PREDICTED: protein HEADING DATE 3A-like	Sesamum indicum	NA	NA	NA	NA	NA
TR44348|c1_g2_i2	56.7324	128.815	1.18306	0.00824671	0.610818	No	NA	NA	NA	NA	NA	NA	NA
TR40516|c0_g1_i5	477.335	1083.68	1.18287	0.000681782	0.144325	No	NA	NA	NA	NA	NA	NA	NA
TR32543|c1_g1_i2	125.203	284.212	1.1827	0.00191623	0.290129	No	PREDICTED: omega-hydroxypalmitate O-feruloyl transferase-like	Erythranthe guttatus	NA	NA	NA	NA	NA
TR32543|c1_g1_i1	136.94	310.792	1.18241	0.00169397	0.267705	No	hypothetical protein MIMGU_mgv1a006316mg	Mimulus guttatus	NA	metabolic process[GO:0008152]	transferase activity, transferring acyl groups other than amino-acyl groups[GO:0016747]	NA	NA
TR38425|c0_g1_i8	58.6887	132.905	1.17924	0.00797338	0.609666	No	PREDICTED: uncharacterized protein LOC105175920	Sesamum indicum	NA	NA	NA	NA	NA
TR41287|c1_g5_i1	46.9509	106.324	1.17924	0.0119204	0.697003	No	NA	NA	NA	NA	NA	NA	NA
TR38642|c0_g1_i2	35.2132	79.7428	1.17924	0.018972	0.815307	No	hypothetical protein B456_008G003100	Gossypium raimondii	NA	protein phosphorylation[GO:0006468]	ATP binding[GO:0005524] ; protein serine/threonine kinase activity[GO:0004674]	NA	NA
TR10224|c0_g1_i1	11.7377	26.5809	1.17924	0.0307431	0.936314	No	PREDICTED: chromodomain-helicase-DNA-binding protein 1-like	Eucalyptus grandis	NA	NA	NA	NA	NA
TR27640|c0_g1_i1	11.7377	26.5809	1.17924	0.0307431	0.937146	No	PREDICTED: probable folate-biopterin transporter 2	Sesamum indicum	NA	NA	NA	NA	NA
TR32892|c2_g2_i1	11.7377	26.5809	1.17924	0.0307431	0.938815	No	PREDICTED: probable F-actin-capping protein subunit beta	Nelumbo nucifera	NA	NA	NA	NA	NA
TR33807|c0_g2_i2	11.7377	26.5809	1.17924	0.0307431	0.939233	No	NA	NA	NA	NA	NA	NA	NA
TR38050|c4_g1_i1	11.7377	26.5809	1.17924	0.0307431	0.938397	No	hypothetical protein MIMGU_mgv1a006995mg	Mimulus guttatus	NA	NA	NA	NA	NA
TR40384|c0_g3_i1	11.7377	26.5809	1.17924	0.0307431	0.933826	No	NA	NA	NA	NA	NA	NA	NA
TR1740|c0_g2_i1	11.7377	26.5809	1.17924	0.0307431	0.935898	No	NA	NA	NA	NA	NA	NA	NA
TR30249|c1_g2_i1	11.7377	26.5809	1.17924	0.0307431	0.934654	No	NA	NA	NA	NA	NA	NA	NA
TR35171|c0_g1_i4	11.7377	26.5809	1.17924	0.0307431	0.937563	No	NA	NA	NA	NA	NA	NA	NA
TR37562|c0_g1_i1	11.7377	26.5809	1.17924	0.0307431	0.93673	No	NA	NA	NA	NA	NA	NA	NA
TR38909|c2_g3_i1	11.7377	26.5809	1.17924	0.0307431	0.935483	No	PREDICTED: probable mitochondrial chaperone BCS1-B	Nicotiana tomentosiformis	NA	NA	NA	NA	NA
TR43897|c0_g2_i1	11.7377	26.5809	1.17924	0.0307431	0.935068	No	hypothetical protein MIMGU_mgv1a000509mg	Mimulus guttatus	NA	NA	phosphatidylinositol binding[GO:0035091]	integral component of membrane[GO:0016021]	NA
TR7394|c0_g2_i1	11.7377	26.5809	1.17924	0.0307431	0.934239	No	PREDICTED: uncharacterized protein LOC105176693	Sesamum indicum	NA	NA	NA	NA	NA
TR38076|c0_g3_i9	11.7377	26.5809	1.17924	0.0307431	0.933412	No	PREDICTED: psbP domain-containing protein 1, chloroplastic	Sesamum indicum	NA	NA	NA	NA	NA
TR41730|c0_g1_i1	11.7377	26.5809	1.17924	0.0307431	0.93798	No	PREDICTED: uncharacterized protein LOC105166786 isoform X1	Sesamum indicum	NA	NA	NA	NA	NA
TR41108|c0_g4_i2	23.4755	53.1619	1.17924	0.0318285	0.934911	No	NA	NA	NA	NA	NA	NA	NA
TR34045|c0_g4_i2	23.4755	53.1619	1.17924	0.0318285	0.934511	No	PREDICTED: protein EXORDIUM-like	Sesamum indicum	NA	NA	NA	NA	NA
TR38481|c0_g3_i1	23.4755	53.1619	1.17924	0.0318285	0.934111	No	PREDICTED: peptidyl-prolyl cis-trans isomerase FKBP62	Malus domestica	NA	NA	NA	NA	NA
TR32070|c0_g1_i8	23.4755	53.1619	1.17924	0.0318285	0.933712	No	jasmonate ZIM-domain protein 1	Salvia miltiorrhiza	NA	NA	NA	NA	NA
TR38469|c4_g1_i5	48.9072	110.413	1.17479	0.0114288	0.686397	No	hypothetical protein MIMGU_mgv1a023408mg, partial	Mimulus guttatus	NA	oxidation-reduction process[GO:0055114]	fatty-acyl-CoA reductase (alcohol-forming) activity[GO:0080019]	NA	NA
TR10876|c0_g1_i1	37.1695	83.8322	1.17339	0.0181482	0.79893	No	NA	NA	NA	NA	NA	NA	NA
TR24399|c0_g3_i1	37.1695	83.8322	1.17339	0.0181482	0.798417	No	heat shock protein 90, partial	Genlisea aurea	NA	protein folding[GO:0006457] ; response to stress[GO:0006950]	ATP binding[GO:0005524] ; unfolded protein binding[GO:0051082]	NA	NA
TR44215|c1_g7_i5	37.1695	83.8322	1.17339	0.0181482	0.797905	No	PREDICTED: probable galactinol--sucrose galactosyltransferase 2	Sesamum indicum	NA	NA	NA	NA	NA
TR42502|c1_g3_i3	328.657	740.177	1.17129	0.000817658	0.166412	No	hypothetical protein MIMGU_mgv1a000979mg	Mimulus guttatus	NA	oxylipin biosynthetic process[GO:0031408] ; oxidation-reduction process[GO:0055114]	metal ion binding[GO:0046872] ; oxidoreductase activity, acting on single donors with incorporation of molecular oxygen, incorporation of two atoms of oxygen[GO:0016702]	NA	NA
TR21036|c0_g1_i1	25.4318	57.2512	1.17068	0.0304671	0.934129	No	hypothetical protein MIMGU_mgv1a023284mg	Mimulus guttatus	NA	proteolysis[GO:0006508]	serine-type endopeptidase activity[GO:0004252]	NA	NA
TR35000|c0_g1_i5	25.4318	57.2512	1.17068	0.0304671	0.933712	No	PREDICTED: protein TIC 55, chloroplastic	Erythranthe guttatus	NA	NA	NA	NA	NA
TR35103|c3_g1_i2	25.4318	57.2512	1.17068	0.0304671	0.933295	No	PREDICTED: epsin-2-like	Solanum tuberosum	NA	NA	NA	NA	NA
TR38441|c0_g2_i2	25.4318	57.2512	1.17068	0.0304671	0.934965	No	NA	NA	NA	NA	NA	NA	NA
TR7589|c0_g1_i1	25.4318	57.2512	1.17068	0.0304671	0.934547	No	PREDICTED: thioredoxin-like protein Clot	Vigna radiata var. radiata	NA	NA	NA	NA	NA
TR37696|c2_g2_i3	154.547	347.597	1.16937	0.00163747	0.263637	No	NA	NA	NA	NA	NA	NA	NA
TR40516|c0_g1_i1	592.756	1333.14	1.16931	0.000831205	0.168668	No	PREDICTED: stachyose synthase	Sesamum indicum	NA	NA	NA	NA	NA
TR11649|c0_g2_i1	39.1258	87.9216	1.1681	0.0173323	0.788832	No	PREDICTED: expansin-A2-like	Sesamum indicum	NA	NA	NA	NA	NA
TR39185|c0_g2_i2	39.1258	87.9216	1.1681	0.0173323	0.788309	No	PREDICTED: protein LOW PSII ACCUMULATION 1, chloroplastic	Sesamum indicum	NA	NA	NA	NA	NA
TR38300|c0_g1_i2	39.1258	87.9216	1.1681	0.0173323	0.789356	No	hypothetical protein MIMGU_mgv1a006057mg	Mimulus guttatus	NA	protein phosphorylation[GO:0006468] ; signal transduction[GO:0007165]	ATP binding[GO:0005524] ; protein serine/threonine kinase activity[GO:0004674]	integral component of membrane[GO:0016021]	NA
TR34395|c1_g3_i3	144.765	325.105	1.16719	0.00181579	0.27799	No	hypothetical protein MIMGU_mgv1a011904mg	Mimulus guttatus	NA	NA	NA	NA	NA
TR40234|c2_g1_i6	250.405	562.289	1.16705	0.00101308	0.19409	No	PREDICTED: uncharacterized protein LOC105969080	Erythranthe guttatus	NA	NA	NA	NA	NA
TR41730|c0_g2_i3	52.8198	118.592	1.16685	0.010527	0.676041	No	NA	NA	NA	NA	NA	NA	NA
TR2950|c0_g1_i2	52.8198	118.592	1.16685	0.010527	0.675409	No	NA	NA	NA	NA	NA	NA	NA
TR2876|c1_g2_i2	93.9019	210.603	1.1653	0.00357575	0.421391	No	cinnamate/p-coumarate carboxyl methyltransferase 2	Ocimum basilicum	Lamiaceae	NA	NA	NA	NA
TR37263|c3_g3_i3	215.192	482.546	1.16504	0.00118233	0.212284	No	Nucleotide-diphospho-sugar transferases superfamily protein isoform 3	Theobroma cacao	NA	response to salt stress[GO:0009651] ; DNA mediated transformation[GO:0009294] ; cytokinin-activated signaling pathway[GO:0009736] ; response to bacterium[GO:0009617] ; mannosylation[GO:0097502] ; calcium ion transport[GO:0006816] ; Golgi organization[GO:0007030] ; cell wall biogenesis[GO:0042546]	mannan synthase activity[GO:0051753]	integral component of membrane[GO:0016021]	NA
TR39166|c0_g4_i4	68.4701	153.352	1.1633	0.00675046	0.563253	No	PREDICTED: lysosomal beta glucosidase-like	Sesamum indicum	NA	NA	NA	NA	NA
TR33962|c0_g1_i8	54.7761	122.681	1.1633	0.0101171	0.664018	No	glutamine amidotransferase class-I domain-containing family protein	Populus trichocarpa	NA	NA	NA	NA	NA
TR27528|c0_g1_i6	27.388	61.3406	1.1633	0.0289517	0.918037	No	BnaAnng33460D, partial	Brassica napus	NA	NA	NA	NA	NA
TR30983|c0_g1_i1	27.388	61.3406	1.1633	0.0289517	0.918461	No	PREDICTED: FACT complex subunit SPT16-like	Sesamum indicum	NA	NA	NA	NA	NA
TR3571|c1_g2_i3	27.388	61.3406	1.1633	0.0289517	0.918886	No	NA	NA	NA	NA	NA	NA	NA
TR23650|c1_g2_i1	27.388	61.3406	1.1633	0.0289517	0.919312	No	PREDICTED: probable leucine-rich repeat receptor-like serine/threonine-protein kinase At3g14840	Sesamum indicum	NA	NA	NA	NA	NA
TR41581|c0_g1_i1	27.388	61.3406	1.1633	0.0289517	0.919737	No	hypothetical protein M569_15073, partial	Genlisea aurea	NA	NA	NA	NA	NA
TR2636|c0_g2_i1	13.694	30.6703	1.1633	0.0371369	0.968483	No	NA	NA	NA	NA	NA	NA	NA
TR38319|c0_g4_i1	13.694	30.6703	1.1633	0.0371369	0.967747	No	PREDICTED: MATE efflux family protein 9-like, partial	Erythranthe guttatus	NA	NA	NA	NA	NA
TR39961|c0_g2_i5	13.694	30.6703	1.1633	0.0371369	0.96738	No	PREDICTED: uncharacterized protein LOC105156360	Sesamum indicum	NA	NA	NA	NA	NA
TR43911|c1_g3_i1	13.694	30.6703	1.1633	0.0371369	0.967012	No	PREDICTED: SWI/SNF complex subunit SWI3C	Sesamum indicum	NA	NA	NA	NA	NA
TR20326|c0_g3_i1	13.694	30.6703	1.1633	0.0371369	0.968852	No	NA	NA	NA	NA	NA	NA	NA
TR31787|c1_g2_i2	13.694	30.6703	1.1633	0.0371369	0.966279	No	NA	NA	NA	NA	NA	NA	NA
TR32691|c1_g3_i6	13.694	30.6703	1.1633	0.0371369	0.964815	No	PREDICTED: zinc finger protein CONSTANS-LIKE 9-like	Sesamum indicum	NA	NA	NA	NA	NA
TR33021|c1_g1_i1	13.694	30.6703	1.1633	0.0371369	0.96922	No	PREDICTED: CBL-interacting protein kinase 23-like	Malus domestica	NA	NA	NA	NA	NA
TR35911|c1_g2_i1	13.694	30.6703	1.1633	0.0371369	0.966645	No	PREDICTED: CDPK-related kinase 3	Sesamum indicum	NA	NA	NA	NA	NA
TR36623|c0_g4_i1	13.694	30.6703	1.1633	0.0371369	0.964449	No	NA	NA	NA	NA	NA	NA	NA
TR37988|c0_g1_i3	13.694	30.6703	1.1633	0.0371369	0.965546	No	PREDICTED: LOW QUALITY PROTEIN: CCR4-NOT transcription complex subunit 11	Sesamum indicum	NA	NA	NA	NA	NA
TR38628|c0_g4_i2	13.694	30.6703	1.1633	0.0371369	0.96518	No	hypothetical protein MIMGU_mgv1a012713mg	Mimulus guttatus	NA	NA	NA	NA	NA
TR40927|c1_g3_i5	13.694	30.6703	1.1633	0.0371369	0.965912	No	PREDICTED: putative clathrin assembly protein At2g01600	Sesamum indicum	NA	NA	NA	NA	NA
TR28985|c2_g4_i1	13.694	30.6703	1.1633	0.0371369	0.968115	No	PREDICTED: probable LRR receptor-like serine/threonine-protein kinase At3g47570	Sesamum indicum	NA	NA	NA	NA	NA
TR39127|c1_g1_i7	240.624	537.753	1.16017	0.00112176	0.203003	No	PREDICTED: 3-oxoacyl-[acyl-carrier-protein] reductase, chloroplastic-like	Nicotiana tomentosiformis	NA	NA	NA	NA	NA
TR40234|c2_g1_i1	444.078	991.673	1.15905	0.000863543	0.170195	No	PREDICTED: uncharacterized protein LOC105969080	Erythranthe guttatus	NA	NA	NA	NA	NA
TR3024|c0_g1_i2	86.0767	192.201	1.15892	0.00446102	0.471446	No	hypothetical protein MIMGU_mgv1a008991mg	Mimulus guttatus	NA	oxidation-reduction process[GO:0055114]	metal ion binding[GO:0046872] ; oxidoreductase activity[GO:0016491]	NA	NA
TR1733|c0_g1_i1	43.0384	96.1003	1.15892	0.0157716	0.775429	No	NA	NA	NA	NA	NA	NA	NA
TR36728|c0_g6_i3	115.421	257.631	1.1584	0.00269401	0.363013	No	PREDICTED: transcription factor bHLH60-like	Erythranthe guttatus	NA	NA	NA	NA	NA
TR29687|c0_g1_i1	29.3443	65.43	1.15687	0.0274358	0.892666	No	PREDICTED: uncharacterized protein LOC105168722	Sesamum indicum	NA	NA	NA	NA	NA
TR32177|c0_g2_i1	29.3443	65.43	1.15687	0.0274358	0.894363	No	PREDICTED: WAT1-related protein At5g64700-like, partial	Sesamum indicum	NA	NA	NA	NA	NA
TR37954|c0_g1_i1	29.3443	65.43	1.15687	0.0274358	0.893938	No	NA	NA	NA	NA	NA	NA	NA
TR26763|c0_g2_i2	29.3443	65.43	1.15687	0.0274358	0.893513	No	PREDICTED: endoplasmin homolog	Solanum lycopersicum	NA	protein folding[GO:0006457] ; response to stress[GO:0006950]	ATP binding[GO:0005524] ; unfolded protein binding[GO:0051082]	NA	NA
TR44215|c1_g4_i3	29.3443	65.43	1.15687	0.0274358	0.893089	No	PREDICTED: probable galactinol--sucrose galactosyltransferase 2	Sesamum indicum	NA	NA	NA	NA	NA
TR37065|c3_g1_i2	870.549	1940.41	1.15636	0.00123539	0.220083	No	PREDICTED: cytochrome P450 CYP72A219-like	Sesamum indicum	NA	NA	NA	NA	NA
TR31712|c0_g1_i1	74.339	165.62	1.15568	0.00610862	0.539217	No	hypothetical protein MIMGU_mgv1a016151mg	Mimulus guttatus	NA	NA	NA	NA	NA
TR29294|c2_g1_i1	44.9947	100.19	1.15491	0.015041	0.756874	No	PREDICTED: probable disease resistance protein At4g27220-like	Solanum tuberosum	NA	NA	NA	NA	NA
TR42649|c2_g10_i3	3319.82	7385.41	1.15357	0.00925442	0.632204	No	PREDICTED: protein SIEVE ELEMENT OCCLUSION B	Erythranthe guttatus	NA	NA	NA	NA	NA
TR24998|c0_g1_i1	76.2953	169.709	1.1534	0.00591308	0.53293	No	hypothetical protein MIMGU_mgv1a016928mg	Mimulus guttatus	NA	NA	NA	NA	NA
TR40563|c2_g6_i3	107.596	239.228	1.15277	0.00314963	0.390639	No	12-oxophytodienoate reductase	Isodon eriocalyx	Lamiaceae	oxidation-reduction process[GO:0055114]	oxidoreductase activity[GO:0016491] ; FMN binding[GO:0010181]	NA	NA
TR38009|c0_g1_i5	62.6013	139.039	1.15122	0.00872607	0.61637	No	PREDICTED: anthocyanidin 3-O-glucoside 6''-O-acyltransferase-like	Sesamum indicum	NA	NA	NA	NA	NA
TR35657|c0_g4_i3	31.3006	69.5194	1.15122	0.0260118	0.880153	No	hypothetical protein MIMGU_mgv1a002165mg	Mimulus guttatus	NA	protein phosphorylation[GO:0006468]	ATP binding[GO:0005524] ; protein serine/threonine kinase activity[GO:0004674]	NA	NA
TR43965|c1_g2_i1	31.3006	69.5194	1.15122	0.0260118	0.881023	No	PREDICTED: lysine-specific demethylase JMJ706	Sesamum indicum	NA	NA	NA	NA	NA
TR40927|c1_g3_i2	31.3006	69.5194	1.15122	0.0260118	0.879719	No	PREDICTED: putative clathrin assembly protein At2g01600	Sesamum indicum	NA	NA	NA	NA	NA
TR7434|c0_g1_i5	31.3006	69.5194	1.15122	0.0260118	0.880588	No	hypothetical protein MIMGU_mgv1a004228mg	Mimulus guttatus	NA	lipid metabolic process[GO:0006629]	O-acyltransferase activity[GO:0008374]	NA	NA
TR34187|c0_g2_i3	15.6503	34.7597	1.15122	0.0415658	0.993335	No	PREDICTED: phosphatidylinositol/phosphatidylcholine transfer protein SFH2-like	Sesamum indicum	NA	NA	NA	NA	NA
TR39852|c0_g4_i1	15.6503	34.7597	1.15122	0.0415658	0.995764	No	PREDICTED: F-box/LRR-repeat protein 4	Sesamum indicum	NA	NA	NA	NA	NA
TR42927|c1_g4_i1	15.6503	34.7597	1.15122	0.0415658	0.99646	No	NA	NA	NA	NA	NA	NA	NA
TR2260|c0_g1_i1	15.6503	34.7597	1.15122	0.0415658	0.992644	No	NA	NA	NA	NA	NA	NA	NA
TR2507|c0_g2_i2	15.6503	34.7597	1.15122	0.0415658	0.992989	No	PREDICTED: vacuolar protein sorting-associated protein 35A isoform X1	Sesamum indicum	NA	NA	NA	NA	NA
TR28287|c0_g1_i1	15.6503	34.7597	1.15122	0.0415658	0.994028	No	PREDICTED: WD repeat-containing protein 26-like isoform X1	Sesamum indicum	NA	NA	NA	NA	NA
TR32269|c0_g1_i1	15.6503	34.7597	1.15122	0.0415658	0.994375	No	NA	NA	NA	NA	NA	NA	NA
TR3357|c2_g1_i1	15.6503	34.7597	1.15122	0.0415658	0.994722	No	NA	NA	NA	NA	NA	NA	NA
TR39978|c0_g2_i1	15.6503	34.7597	1.15122	0.0415658	0.995069	No	hypothetical protein MIMGU_mgv1a002416mg	Mimulus guttatus	NA	tRNA aminoacylation for protein translation[GO:0006418]	nucleic acid binding[GO:0003676] ; ATP binding[GO:0005524] ; aminoacyl-tRNA ligase activity[GO:0004812]	cytoplasm[GO:0005737]	NA
TR40337|c0_g3_i3	15.6503	34.7597	1.15122	0.0415658	0.995416	No	PREDICTED: putative zinc finger protein At1g68190 isoform X2	Sesamum indicum	NA	NA	NA	NA	NA
TR33021|c1_g4_i1	15.6503	34.7597	1.15122	0.0415658	0.996112	No	PREDICTED: CBL-interacting protein kinase 23	Sesamum indicum	NA	NA	NA	NA	NA
TR38429|c0_g1_i1	15.6503	34.7597	1.15122	0.0415658	0.993682	No	hypothetical protein MIMGU_mgv1a004685mg	Mimulus guttatus	NA	NA	NA	NA	NA
TR38356|c0_g4_i4	131.071	290.346	1.14742	0.00248542	0.346479	No	PREDICTED: uncharacterized protein LOC105971805	Erythranthe guttatus	NA	NA	NA	NA	NA
TR26669|c0_g2_i2	33.2569	73.6087	1.14622	0.0247318	0.861055	No	PREDICTED: ferrochelatase-2, chloroplastic	Erythranthe guttatus	NA	NA	NA	NA	NA
TR2945|c0_g1_i1	33.2569	73.6087	1.14622	0.0247318	0.862368	No	NA	NA	NA	NA	NA	NA	NA
TR38481|c0_g2_i3	33.2569	73.6087	1.14622	0.0247318	0.861492	No	hypothetical protein MIMGU_mgv1a003614mg	Mimulus guttatus	NA	protein folding[GO:0006457]	NA	NA	NA
TR2747|c0_g1_i4	33.2569	73.6087	1.14622	0.0247318	0.86193	No	PREDICTED: protein LURP-one-related 5-like	Sesamum indicum	NA	NA	NA	NA	NA
TR3684|c0_g3_i1	138.897	306.703	1.14283	0.00240122	0.337485	No	jasmonate ZIM domain protein 2, partial	Salvia miltiorrhiza	NA	NA	NA	NA	NA
TR41165|c0_g6_i1	35.2132	77.6981	1.14176	0.0235528	0.859721	No	PREDICTED: glutamyl-tRNA(Gln) amidotransferase subunit A, chloroplastic/mitochondrial, partial	Nicotiana sylvestris	NA	NA	NA	NA	NA
TR42608|c0_g1_i1	35.2132	77.6981	1.14176	0.0235528	0.861096	No	PREDICTED: pentatricopeptide repeat-containing protein At1g02150	Erythranthe guttatus	NA	NA	NA	NA	NA
TR7583|c2_g1_i4	35.2132	77.6981	1.14176	0.0235528	0.860637	No	PREDICTED: protein TIFY 10A-like isoform X1	Sesamum indicum	NA	NA	NA	NA	NA
TR37214|c0_g8_i5	35.2132	77.6981	1.14176	0.0235528	0.860179	No	PREDICTED: uncharacterized protein LOC105966976	Erythranthe guttatus	NA	NA	NA	NA	NA
TR9750|c0_g1_i1	35.2132	77.6981	1.14176	0.0235528	0.859263	No	NA	NA	NA	NA	NA	NA	NA
TR17246|c0_g1_i1	17.6066	38.8491	1.14176	0.0438155	1.00039	No	PREDICTED: protein TIME FOR COFFEE	Sesamum indicum	NA	NA	NA	NA	NA
TR32372|c0_g1_i3	17.6066	38.8491	1.14176	0.0438155	1.00172	No	PREDICTED: protein SAWADEE HOMEODOMAIN HOMOLOG 1-like	Sesamum indicum	NA	NA	NA	NA	NA
TR41351|c0_g3_i4	17.6066	38.8491	1.14176	0.0438155	1.00139	No	PREDICTED: F-box/kelch-repeat protein At1g67480-like	Sesamum indicum	NA	NA	NA	NA	NA
TR18745|c0_g1_i1	17.6066	38.8491	1.14176	0.0438155	1.00106	No	hypothetical protein MIMGU_mgv1a004155mg	Mimulus guttatus	NA	NA	NA	integral component of membrane[GO:0016021]	NA
TR22877|c0_g1_i2	17.6066	38.8491	1.14176	0.0438155	0.999725	No	PREDICTED: probable alpha,alpha-trehalose-phosphate synthase [UDP-forming] 10	Sesamum indicum	NA	NA	NA	NA	NA
TR27923|c0_g1_i1	17.6066	38.8491	1.14176	0.0438155	0.999392	No	hypothetical protein MTR_2g012480	Medicago truncatula	NA	NA	NA	NA	NA
TR34958|c0_g1_i1	17.6066	38.8491	1.14176	0.0438155	0.998728	No	PREDICTED: LOW QUALITY PROTEIN: cell division protein FtsY homolog, chloroplastic, partial	Erythranthe guttatus	NA	NA	NA	NA	NA
TR35670|c0_g5_i1	17.6066	38.8491	1.14176	0.0438155	1.00273	No	NA	NA	NA	NA	NA	NA	NA
TR39443|c0_g4_i1	17.6066	38.8491	1.14176	0.0438155	0.99906	No	PREDICTED: UTP--glucose-1-phosphate uridylyltransferase-like	Populus euphratica	NA	NA	NA	NA	NA
TR40647|c0_g2_i1	17.6066	38.8491	1.14176	0.0438155	1.00006	No	hypothetical protein B456_011G240200	Gossypium raimondii	NA	chorismate biosynthetic process[GO:0009423] ; aromatic amino acid family biosynthetic process[GO:0009073]	chorismate synthase activity[GO:0004107]	integral component of membrane[GO:0016021]	map01130:Biosynthesis of antibiotics(synthase[ec:4.2.3.5]) ; map00400:Phenylalanine, tyrosine and tryptophan biosynthesis(synthase[ec:4.2.3.5])
TR41325|c1_g2_i1	17.6066	38.8491	1.14176	0.0438155	1.00072	No	NA	NA	NA	NA	NA	NA	NA
TR43193|c0_g2_i4	17.6066	38.8491	1.14176	0.0438155	1.00206	No	hypothetical protein MIMGU_mgv1a000805mg	Mimulus guttatus	NA	protein phosphorylation[GO:0006468]	ATP binding[GO:0005524] ; protein serine/threonine kinase activity[GO:0004674]	NA	NA
TR40490|c1_g2_i1	17.6066	38.8491	1.14176	0.0438155	1.00239	No	hypothetical protein MIMGU_mgv1a007071mg	Mimulus guttatus	NA	NA	NA	NA	NA
TR38704|c1_g1_i6	248.449	547.976	1.14117	0.00132031	0.229837	No	hypothetical protein MIMGU_mgv1a006920mg	Mimulus guttatus	NA	protein folding[GO:0006457]	unfolded protein binding[GO:0051082] ; calcium ion binding[GO:0005509]	endoplasmic reticulum[GO:0005783]	NA
TR31934|c0_g2_i1	144.765	318.971	1.13971	0.00234481	0.334352	No	NA	NA	NA	NA	NA	NA	NA
TR33606|c1_g6_i4	181.935	400.759	1.13931	0.0018065	0.277808	No	PREDICTED: serine--glyoxylate aminotransferase-like isoform X1	Brassica napus	NA	NA	NA	NA	NA
TR40563|c2_g3_i1	54.7761	120.637	1.13905	0.0119779	0.69977	No	12-oxophytodienoate reductase	Isodon eriocalyx	Lamiaceae	oxidation-reduction process[GO:0055114]	oxidoreductase activity[GO:0016491] ; FMN binding[GO:0010181]	NA	NA
TR3338|c0_g1_i3	54.7761	120.637	1.13905	0.0119779	0.699175	No	PREDICTED: protein N-terminal glutamine amidohydrolase	Sesamum indicum	NA	NA	NA	NA	NA
TR33118|c0_g1_i4	483.203	1063.24	1.13776	0.00107148	0.198085	No	PREDICTED: expansin-A10	Sesamum indicum	NA	NA	NA	NA	NA
TR42502|c1_g5_i2	185.847	408.937	1.13776	0.00179234	0.278125	No	PREDICTED: linoleate 13S-lipoxygenase 2-1, chloroplastic-like	Sesamum indicum	NA	NA	NA	NA	NA
TR37841|c0_g6_i6	37.1695	81.7875	1.13776	0.022389	0.854532	No	PREDICTED: probable WRKY transcription factor 40	Sesamum indicum	NA	NA	NA	NA	NA
TR39326|c0_g2_i4	56.7324	124.726	1.13652	0.0114811	0.682964	No	NA	NA	NA	NA	NA	NA	NA
TR34225|c0_g1_i4	76.2953	167.664	1.13591	0.00679314	0.564753	No	PREDICTED: uncharacterized protein LOC105177106	Sesamum indicum	NA	NA	NA	NA	NA
TR40550|c0_g1_i2	95.8582	210.603	1.13555	0.00444274	0.470238	No	PREDICTED: V-type proton ATPase subunit B1-like	Brassica napus	NA	NA	NA	NA	NA
TR43406|c1_g1_i1	134.984	296.48	1.13515	0.00267233	0.361513	No	PREDICTED: AMP deaminase-like isoform X2	Sesamum indicum	NA	NA	NA	NA	NA
TR36836|c1_g3_i1	58.6887	128.815	1.13415	0.0110198	0.677251	No	NA	NA	NA	NA	NA	NA	NA
TR44301|c1_g9_i1	39.1258	85.8769	1.13415	0.0212583	0.840372	No	putative phosphatidylinositol-4-phosphate-5-kinase	Arabidopsis thaliana	NA	NA	NA	NA	NA
TR8181|c5_g3_i2	39.1258	85.8769	1.13415	0.0212583	0.841828	No	NA	NA	NA	NA	NA	NA	NA
TR18470|c0_g1_i2	39.1258	85.8769	1.13415	0.0212583	0.841342	No	PREDICTED: CO(2)-response secreted protease-like	Sesamum indicum	NA	NA	NA	NA	NA
TR30402|c0_g1_i3	39.1258	85.8769	1.13415	0.0212583	0.839888	No	hypothetical protein M569_16468	Genlisea aurea	NA	NA	DNA binding[GO:0003677]	NA	NA
TR35862|c0_g1_i2	39.1258	85.8769	1.13415	0.0212583	0.840857	No	NA	NA	NA	NA	NA	NA	NA
TR33153|c0_g1_i1	19.5629	42.9384	1.13415	0.0444453	0.996199	No	PREDICTED: S-adenosylmethionine decarboxylase proenzyme-like	Sesamum indicum	NA	NA	NA	NA	NA
TR37456|c0_g2_i4	19.5629	42.9384	1.13415	0.0444453	0.99685	No	NA	NA	NA	NA	NA	NA	NA
TR43836|c1_g3_i1	19.5629	42.9384	1.13415	0.0444453	0.999137	No	PREDICTED: serine/threonine-protein phosphatase 6 regulatory subunit 3	Sesamum indicum	NA	NA	NA	NA	NA
TR44738|c7_g5_i3	19.5629	42.9384	1.13415	0.0444453	0.996524	No	PREDICTED: probable LRR receptor-like serine/threonine-protein kinase At3g47570	Erythranthe guttatus	NA	NA	NA	NA	NA
TR44878|c4_g4_i2	19.5629	42.9384	1.13415	0.0444453	0.997829	No	unnamed protein product, partial	Coffea canephora	NA	vesicle-mediated transport[GO:0016192] ; intracellular protein transport[GO:0006886]	structural molecule activity[GO:0005198]	clathrin coat of coated pit[GO:0030132] ; clathrin coat of trans-Golgi network vesicle[GO:0030130]	NA
TR36725|c0_g4_i4	19.5629	42.9384	1.13415	0.0444453	0.998156	No	hypothetical protein MIMGU_mgv1a0131031mg, partial	Mimulus guttatus	NA	transport[GO:0006810]	NA	integral component of membrane[GO:0016021]	NA
TR37311|c0_g4_i1	19.5629	42.9384	1.13415	0.0444453	0.997176	No	hypothetical protein MIMGU_mgv1a026353mg, partial	Mimulus guttatus	NA	proteolysis[GO:0006508]	serine-type endopeptidase activity[GO:0004252]	NA	NA
TR39063|c0_g2_i1	19.5629	42.9384	1.13415	0.0444453	0.998483	No	unnamed protein product	Vitis vinifera	NA	NA	NA	NA	NA
TR31200|c0_g1_i3	19.5629	42.9384	1.13415	0.0444453	0.99881	No	NA	NA	NA	NA	NA	NA	NA
TR42355|c0_g1_i2	19.5629	42.9384	1.13415	0.0444453	0.997503	No	unnamed protein product	Vitis vinifera	NA	NA	NA	NA	NA
TR34290|c0_g1_i1	80.2079	175.843	1.13247	0.00634832	0.547	No	hypothetical protein VITISV_023640	Vitis vinifera	NA	NA	NA	NA	NA
TR28199|c0_g1_i2	60.645	132.905	1.13193	0.0105919	0.675785	No	NA	NA	NA	NA	NA	NA	NA
TR43771|c1_g1_i8	41.0821	89.9662	1.13087	0.0201733	0.823588	No	hypothetical protein MIMGU_mgv1a023997mg, partial	Mimulus guttatus	NA	NA	NA	NA	NA
TR33806|c2_g2_i2	41.0821	89.9662	1.13087	0.0201733	0.82457	No	PREDICTED: LOW QUALITY PROTEIN: uncharacterized protein LOC105165795	Sesamum indicum	NA	NA	NA	NA	NA
TR34779|c0_g1_i3	41.0821	89.9662	1.13087	0.0201733	0.825061	No	PREDICTED: 50S ribosomal protein L6, chloroplastic-like	Solanum lycopersicum	NA	cytoplasmic translation[GO:0002181]	structural constituent of ribosome[GO:0003735] ; rRNA binding[GO:0019843]	ribosome[GO:0005840]	NA
TR35019|c0_g2_i17	41.0821	89.9662	1.13087	0.0201733	0.823098	No	NA	NA	NA	NA	NA	NA	NA
TR38208|c0_g4_i1	41.0821	89.9662	1.13087	0.0201733	0.824079	No	hypothetical protein BVRB_1g010710	Beta vulgaris subsp. vulgaris	NA	photosynthesis[GO:0015979]	NA	integral component of membrane[GO:0016021] ; photosystem I[GO:0009522]	NA
TR2850|c1_g4_i3	86.0767	188.111	1.12789	0.00576716	0.530231	No	PREDICTED: uncharacterized protein LOC105173228	Sesamum indicum	NA	NA	NA	NA	NA
TR38204|c1_g5_i4	43.0384	94.0556	1.12789	0.0191417	0.82157	No	PREDICTED: ethylene-responsive transcription factor-like protein At4g13040 isoform X3	Sesamum indicum	NA	NA	NA	NA	NA
TR24790|c0_g2_i1	21.5192	47.0278	1.12789	0.0435685	1.00852	No	PREDICTED: LOW QUALITY PROTEIN: uncharacterized protein LOC105176486	Sesamum indicum	NA	NA	NA	NA	NA
TR35075|c0_g2_i1	21.5192	47.0278	1.12789	0.0435685	1.00818	No	PREDICTED: ribosomal RNA-processing protein 14-C-like	Sesamum indicum	NA	NA	NA	NA	NA
TR44301|c1_g9_i3	21.5192	47.0278	1.12789	0.0435685	1.00682	No	NA	NA	NA	NA	NA	NA	NA
TR7320|c0_g1_i2	21.5192	47.0278	1.12789	0.0435685	1.00716	No	NA	NA	NA	NA	NA	NA	NA
TR32672|c0_g1_i2	21.5192	47.0278	1.12789	0.0435685	1.00784	No	hypothetical protein MIMGU_mgv1a009567mg	Mimulus guttatus	NA	transport[GO:0006810]	NA	integral component of membrane[GO:0016021]	NA
TR33007|c1_g2_i6	21.5192	47.0278	1.12789	0.0435685	1.0092	No	NA	NA	NA	NA	NA	NA	NA
TR37859|c0_g1_i4	21.5192	47.0278	1.12789	0.0435685	1.00886	No	hypothetical protein MIMGU_mgv1a008875mg	Mimulus guttatus	NA	protein dephosphorylation[GO:0006470]	metal ion binding[GO:0046872] ; protein serine/threonine phosphatase activity[GO:0004722]	NA	NA
TR41306|c0_g3_i2	21.5192	47.0278	1.12789	0.0435685	1.0075	No	PREDICTED: solute carrier family 40 member 3, chloroplastic isoform X2	Sesamum indicum	NA	NA	NA	NA	NA
TR43057|c4_g2_i2	21.5192	47.0278	1.12789	0.0435685	1.00954	No	NA	NA	NA	NA	NA	NA	NA
TR42502|c1_g3_i8	266.055	580.691	1.12604	0.00145628	0.244209	No	NA	NA	NA	NA	NA	NA	NA
TR27143|c0_g1_i2	66.5138	145.173	1.12604	0.00942967	0.640349	No	PREDICTED: HMG-Y-related protein A-like	Sesamum indicum	NA	NA	NA	NA	NA
TR31676|c0_g1_i8	44.9947	98.145	1.12516	0.0181675	0.798242	No	NA	NA	NA	NA	NA	NA	NA
TR33275|c0_g1_i2	418.646	911.931	1.12319	0.00123849	0.220063	No	PREDICTED: uncharacterized protein LOC105171048	Sesamum indicum	NA	NA	NA	NA	NA
TR1714|c0_g1_i1	70.4264	153.352	1.12265	0.00872979	0.615998	No	NA	NA	NA	NA	NA	NA	NA
TR31180|c0_g3_i1	46.9509	102.234	1.12265	0.0172526	0.790452	No	PREDICTED: UDP-galactose transporter 2	Sesamum indicum	NA	NA	NA	NA	NA
TR37802|c0_g3_i3	23.4755	51.1172	1.12265	0.0417847	0.987896	No	PREDICTED: glutamyl-tRNA reductase 1, chloroplastic	Cucumis melo	NA	NA	NA	NA	NA
TR41507|c1_g2_i4	213.236	464.144	1.12212	0.00181472	0.278448	No	NA	NA	NA	NA	NA	NA	NA
TR2255|c10_g3_i2	692.526	1506.93	1.12168	0.00142483	0.241893	No	lavandulyl diphsophate synthase	Lavandula x intermedia	NA	metabolic process[GO:0008152]	transferase activity, transferring alkyl or aryl (other than methyl) groups[GO:0016765]	NA	NA
TR43912|c1_g1_i1	95.8582	208.558	1.12148	0.0050023	0.498681	No	NA	NA	NA	NA	NA	NA	NA
TR37612|c1_g3_i1	72.3827	157.441	1.12109	0.00840382	0.616463	No	PREDICTED: uncharacterized protein LOC105164832	Sesamum indicum	NA	NA	NA	NA	NA
TR7446|c0_g1_i3	72.3827	157.441	1.12109	0.00840382	0.617123	No	PREDICTED: uncharacterized protein LOC105162045	Sesamum indicum	NA	NA	NA	NA	NA
TR37268|c0_g1_i5	48.9072	106.324	1.12034	0.0163969	0.776133	No	PREDICTED: protein STRICTOSIDINE SYNTHASE-LIKE 11	Sesamum indicum	NA	NA	NA	NA	NA
TR42649|c2_g10_i2	1942.6	4222.28	1.12004	0.0046061	0.479391	No	PREDICTED: uncharacterized protein LOC105168700	Sesamum indicum	NA	NA	NA	NA	NA
TR7458|c0_g1_i2	125.203	271.943	1.11904	0.00340756	0.410745	No	PREDICTED: uncharacterized protein LOC105164832	Sesamum indicum	NA	NA	NA	NA	NA
TR40068|c3_g1_i4	76.2953	165.62	1.11821	0.00779984	0.609302	No	hypothetical protein MIMGU_mgv1a006089mg	Mimulus guttatus	NA	metabolic process[GO:0008152]	transferase activity, transferring acyl groups other than amino-acyl groups[GO:0016747]	NA	NA
TR43807|c0_g5_i3	76.2953	165.62	1.11821	0.00779984	0.609997	No	PREDICTED: transcription factor bHLH13-like	Sesamum indicum	NA	NA	NA	NA	NA
TR25216|c0_g1_i1	50.8635	110.413	1.11821	0.0155992	0.769716	No	PREDICTED: coatomer subunit gamma-2-like	Sesamum indicum	NA	NA	NA	NA	NA
TR38798|c0_g1_i3	25.4318	55.2066	1.11821	0.0395645	0.979289	No	hypothetical protein MIMGU_mgv1a004614mg	Mimulus guttatus	NA	metabolic process[GO:0008152]	hydrolase activity, acting on ester bonds[GO:0016788]	NA	NA
TR42831|c0_g1_i1	25.4318	55.2066	1.11821	0.0395645	0.978583	No	hypothetical protein B456_010G138600	Gossypium raimondii	NA	protein dephosphorylation[GO:0006470]	protein serine/threonine phosphatase activity[GO:0004722]	NA	NA
TR7829|c0_g6_i3	25.4318	55.2066	1.11821	0.0395645	0.977878	No	hypothetical protein MIMGU_mgv1a001819mg	Mimulus guttatus	NA	NA	NA	NA	NA
TR39306|c0_g6_i10	25.4318	55.2066	1.11821	0.0395645	0.97823	No	PREDICTED: diacylglycerol kinase 5	Sesamum indicum	NA	NA	NA	NA	NA
TR39716|c1_g1_i7	25.4318	55.2066	1.11821	0.0395645	0.978936	No	PREDICTED: beta-glucosidase-like SFR2, chloroplastic	Sesamum indicum	NA	NA	NA	NA	NA
TR28895|c0_g2_i1	154.547	335.329	1.11753	0.00265642	0.360784	No	alcohol acetyltransferase	Lavandula x intermedia	NA	NA	transferase activity[GO:0016740]	NA	NA
TR18414|c0_g3_i1	78.2516	169.709	1.11687	0.00752131	0.601942	No	NA	NA	NA	NA	NA	NA	NA
TR43164|c6_g1_i1	52.8198	114.502	1.11623	0.0148575	0.757644	No	PREDICTED: ethylene-responsive transcription factor ERF118-like	Sesamum indicum	NA	NA	NA	NA	NA
TR27307|c1_g1_i2	52.8198	114.502	1.11623	0.0148575	0.757081	No	NA	NA	NA	NA	NA	NA	NA
TR33988|c3_g1_i12	238.667	517.306	1.11602	0.00174419	0.272502	No	PREDICTED: probable S-adenosylmethionine-dependent methyltransferase At5g37990	Sesamum indicum	NA	NA	NA	NA	NA
TR35495|c2_g2_i4	54.7761	118.592	1.11439	0.0141692	0.739591	No	conserved hypothetical protein	Ricinus communis	NA	NA	NA	NA	NA
TR38860|c0_g1_i2	27.388	59.2959	1.11439	0.0372135	0.962428	No	hypothetical protein B456_011G239000	Gossypium raimondii	NA	carbohydrate metabolic process[GO:0005975]	intramolecular transferase activity, phosphotransferases[GO:0016868]	NA	NA
TR36250|c0_g1_i4	770.778	1668.46	1.11413	0.00163985	0.262786	No	PREDICTED: putative ion channel POLLUX-like 2 isoform X2	Sesamum indicum	NA	NA	NA	NA	NA
TR30635|c0_g1_i2	170.197	368.044	1.11267	0.00249327	0.346868	No	PREDICTED: LOW QUALITY PROTEIN: benzyl alcohol O-benzoyltransferase-like	Sesamum indicum	NA	NA	NA	NA	NA
TR43728|c0_g3_i3	29.3443	63.3853	1.11107	0.0349193	0.951155	No	PREDICTED: ferric reduction oxidase 2-like isoform X1	Sesamum indicum	NA	NA	NA	NA	NA
TR26298|c0_g1_i1	29.3443	63.3853	1.11107	0.0349193	0.94927	No	PREDICTED: probable serine/threonine-protein kinase At1g54610 isoform X2	Sesamum indicum	NA	NA	NA	NA	NA
TR29726|c7_g1_i1	29.3443	63.3853	1.11107	0.0349193	0.950778	No	NA	NA	NA	NA	NA	NA	NA
TR36328|c1_g2_i2	29.3443	63.3853	1.11107	0.0349193	0.950401	No	PREDICTED: protein disulfide isomerase-like 2-3	Sesamum indicum	NA	NA	NA	NA	NA
TR36365|c1_g1_i5	29.3443	63.3853	1.11107	0.0349193	0.949647	No	PREDICTED: UDP-glycosyltransferase 83A1	Sesamum indicum	NA	NA	NA	NA	NA
TR41177|c0_g6_i1	29.3443	63.3853	1.11107	0.0349193	0.950024	No	NA	NA	NA	NA	NA	NA	NA
TR19125|c0_g2_i1	60.645	130.86	1.10956	0.0123963	0.709703	No	PREDICTED: wall-associated receptor kinase 1-like	Erythranthe guttatus	NA	NA	NA	NA	NA
TR39650|c1_g2_i2	123.246	265.809	1.10885	0.00380513	0.440849	No	PREDICTED: probable galactinol--sucrose galactosyltransferase 2	Eucalyptus grandis	NA	metabolic process[GO:0008152]	catalytic activity[GO:0003824]	NA	NA
TR34401|c0_g2_i1	31.3006	67.4747	1.10815	0.0327903	0.940998	No	NA	NA	NA	NA	NA	NA	NA
TR35420|c1_g1_i4	31.3006	67.4747	1.10815	0.0327903	0.941392	No	PREDICTED: uncharacterized protein LOC105167721 isoform X1	Sesamum indicum	NA	NA	NA	NA	NA
TR43235|c3_g1_i3	164.328	353.731	1.10607	0.0027526	0.365877	No	NA	NA	NA	NA	NA	NA	NA
TR29472|c0_g1_i2	33.2569	71.5641	1.10558	0.0308831	0.93518	No	NA	NA	NA	NA	NA	NA	NA
TR39035|c0_g2_i1	33.2569	71.5641	1.10558	0.0308831	0.934767	No	hypothetical protein MIMGU_mgv1a005315mg	Mimulus guttatus	NA	proteolysis[GO:0006508]	peptidase activity[GO:0008233]	NA	NA
TR42649|c2_g8_i2	203.454	437.563	1.10479	0.00223796	0.323829	No	PREDICTED: uncharacterized protein LOC105168700	Sesamum indicum	NA	NA	NA	NA	NA
TR42617|c0_g3_i4	68.4701	147.217	1.1044	0.0105054	0.677191	No	PREDICTED: putative DUF21 domain-containing protein At3g13070, chloroplastic isoform X1	Sesamum indicum	NA	NA	NA	NA	NA
TR39132|c1_g1_i5	35.2132	75.6534	1.10329	0.0291919	0.921816	No	NA	NA	NA	NA	NA	NA	NA
TR39886|c1_g5_i1	35.2132	75.6534	1.10329	0.0291919	0.922665	No	PREDICTED: uncharacterized protein LOC105169034	Sesamum indicum	NA	NA	NA	NA	NA
TR40080|c0_g5_i5	35.2132	75.6534	1.10329	0.0291919	0.92224	No	PREDICTED: peroxisomal membrane protein 13	Sesamum indicum	NA	NA	NA	NA	NA
TR41104|c2_g3_i3	213.236	458.01	1.10293	0.00217964	0.318753	No	tyrosine aminotransferase	Solenostemon scutellarioides	NA	cellular amino acid metabolic process[GO:0006520] ; biosynthetic process[GO:0009058]	pyridoxal phosphate binding[GO:0030170] ; L-tyrosine:2-oxoglutarate aminotransferase activity[GO:0004838] ; L-phenylalanine:2-oxoglutarate aminotransferase activity[GO:0080130]	NA	map00130:Ubiquinone and other terpenoid-quinone biosynthesis(transaminase[ec:2.6.1.5]) ; map00350:Tyrosine metabolism(transaminase[ec:2.6.1.57]) ; map00350:Tyrosine metabolism(transaminase[ec:2.6.1.9]) ; map00350:Tyrosine metabolism(transaminase[ec:2.6.1.5]) ; map00350:Tyrosine metabolism(transaminase[ec:2.6.1.1]) ; map00220:Arginine biosynthesis(transaminase[ec:2.6.1.1]) ; map00950:Isoquinoline …
TR37930|c0_g1_i1	72.3827	155.396	1.10223	0.00968638	0.649423	No	PREDICTED: sugar carrier protein C	Sesamum indicum	NA	NA	NA	NA	NA
TR44738|c7_g2_i1	72.3827	155.396	1.10223	0.00968638	0.650059	No	PREDICTED: probable LRR receptor-like serine/threonine-protein kinase At3g47570	Sesamum indicum	NA	NA	NA	NA	NA
TR21679|c0_g1_i1	72.3827	155.396	1.10223	0.00968638	0.648789	No	NA	NA	NA	NA	NA	NA	NA
TR36354|c1_g2_i3	37.1695	79.7428	1.10124	0.0275771	0.89514	No	PREDICTED: vesicle-associated membrane protein 714	Sesamum indicum	NA	NA	NA	NA	NA
TR37450|c1_g5_i1	37.1695	79.7428	1.10124	0.0275771	0.895563	No	NA	NA	NA	NA	NA	NA	NA
TR2741|c1_g1_i2	299.312	642.032	1.10099	0.00172764	0.271152	No	PREDICTED: flavanone 3-dioxygenase-like	Sesamum indicum	NA	NA	NA	NA	NA
TR33933|c0_g1_i2	113.465	243.318	1.1006	0.00457215	0.476581	No	hypothetical protein MIMGU_mgv1a012910mg	Mimulus guttatus	NA	single-organism metabolic process[GO:0044710]	NA	membrane[GO:0016020]	NA
TR28895|c0_g1_i3	191.716	410.982	1.1001	0.00247761	0.346094	No	alcohol acetyltransferase	Lavandula x intermedia	NA	NA	transferase activity[GO:0016740]	NA	NA
TR41122|c1_g2_i3	39.1258	83.8322	1.09938	0.0260342	0.879611	No	PREDICTED: metal tolerance protein C4 isoform X3	Sesamum indicum	NA	NA	NA	NA	NA
TR43771|c1_g2_i1	39.1258	83.8322	1.09938	0.0260342	0.880044	No	PREDICTED: probable leucine-rich repeat receptor-like serine/threonine-protein kinase At3g14840 isoform X3	Erythranthe guttatus	NA	NA	NA	NA	NA
TR37263|c3_g3_i11	41.0821	87.9216	1.09771	0.0245736	0.86079	No	PREDICTED: glucomannan 4-beta-mannosyltransferase 9-like	Cucumis melo	NA	NA	NA	NA	NA
TR25010|c0_g1_i1	41.0821	87.9216	1.09771	0.0245736	0.860351	No	PREDICTED: transcription factor bHLH35	Erythranthe guttatus	NA	NA	NA	NA	NA
TR3662|c0_g1_i2	41.0821	87.9216	1.09771	0.0245736	0.86123	No	PREDICTED: CASP-like protein 4B1	Sesamum indicum	NA	NA	NA	NA	NA
TR7910|c0_g2_i1	2187.13	4680.29	1.09756	0.00643884	0.550649	No	NA	NA	NA	NA	NA	NA	NA
TR38935|c1_g1_i1	127.159	271.943	1.09668	0.00406041	0.447017	No	PREDICTED: scarecrow-like protein 21	Sesamum indicum	NA	NA	NA	NA	NA
TR35989|c0_g3_i1	43.0384	92.0109	1.09618	0.0232002	0.861524	No	PREDICTED: cellulose synthase A catalytic subunit 2 [UDP-forming]	Sesamum indicum	NA	NA	NA	NA	NA
TR37542|c0_g2_i1	43.0384	92.0109	1.09618	0.0232002	0.861057	No	hypothetical protein MIMGU_mgv1a010039mg	Mimulus guttatus	NA	NA	NA	NA	NA
TR32181|c0_g1_i2	43.0384	92.0109	1.09618	0.0232002	0.859662	No	hypothetical protein MIMGU_mgv1a011827mg	Mimulus guttatus	NA	NA	NA	NA	NA
TR39644|c1_g4_i8	43.0384	92.0109	1.09618	0.0232002	0.860592	No	NA	NA	NA	NA	NA	NA	NA
TR43384|c0_g3_i7	43.0384	92.0109	1.09618	0.0232002	0.860127	No	hypothetical protein B456_003G150700	Gossypium raimondii	NA	NA	NA	NA	NA
TR44215|c1_g3_i1	43.0384	92.0109	1.09618	0.0232002	0.86199	No	PREDICTED: probable galactinol--sucrose galactosyltransferase 2	Sesamum indicum	NA	NA	NA	NA	NA
TR43326|c0_g9_i2	307.137	656.345	1.09557	0.00179585	0.276791	No	hypothetical protein MIMGU_mgv1a002500mg	Mimulus guttatus	NA	NA	ATP binding[GO:0005524]	NA	NA
TR33275|c0_g1_i3	440.165	940.556	1.09547	0.00161563	0.261966	No	PREDICTED: uncharacterized protein LOC105171048	Sesamum indicum	NA	NA	NA	NA	NA
TR28616|c0_g1_i2	134.984	288.301	1.09479	0.00382887	0.441362	No	AF221856_1heat-shock protein 80	Euphorbia esula	NA	protein folding[GO:0006457] ; response to stress[GO:0006950]	ATP binding[GO:0005524] ; unfolded protein binding[GO:0051082]	NA	NA
TR38268|c0_g1_i5	44.9947	96.1003	1.09479	0.0219157	0.852117	No	hypothetical protein MIMGU_mgv1a003907mg	Mimulus guttatus	NA	metabolic process[GO:0008152]	catalytic activity[GO:0003824]	NA	NA
TR43260|c1_g1_i5	46.9509	100.19	1.09351	0.0207191	0.834445	No	hypothetical protein MIMGU_mgv1a003414mg	Mimulus guttatus	NA	transport[GO:0006810]	transporter activity[GO:0005215]	integral component of membrane[GO:0016021]	NA
TR39035|c0_g1_i1	332.569	709.507	1.09316	0.00177027	0.275949	No	endopeptidase 1	Plantago major	NA	proteolysis[GO:0006508]	peptidase activity[GO:0008233]	NA	NA
TR32931|c2_g1_i5	48.9072	104.279	1.09233	0.0196078	0.832201	No	hypothetical protein MIMGU_mgv1a024506mg, partial	Mimulus guttatus	NA	NA	NA	NA	NA
TR39136|c0_g1_i2	50.8635	108.368	1.09124	0.0185781	0.806464	No	PREDICTED: RPM1-interacting protein 4-like	Sesamum indicum	NA	NA	NA	NA	NA
TR38387|c1_g2_i4	52.8198	112.458	1.09023	0.0176257	0.787554	No	hypothetical protein MIMGU_mgv1a001868mg	Mimulus guttatus	NA	oxidation-reduction process[GO:0055114]	flavin adenine dinucleotide binding[GO:0050660] ; long-chain-alcohol oxidase activity[GO:0046577]	membrane[GO:0016020]	NA
TR27488|c0_g1_i2	56.7324	120.637	1.08842	0.0159348	0.776221	No	PREDICTED: peroxidase 6	Sesamum indicum	NA	NA	NA	NA	NA
TR2255|c10_g1_i1	307.137	652.255	1.08655	0.00195909	0.295314	No	lavandulyl diphsophate synthase	Lavandula x intermedia	NA	NA	NA	NA	NA
TR7910|c0_g3_i1	807.947	1715.49	1.08629	0.00217859	0.319279	No	PREDICTED: glutamate--glyoxylate aminotransferase 2	Musa acuminata subsp. malaccensis	NA	biosynthetic process[GO:0009058]	pyridoxal phosphate binding[GO:0030170] ; catalytic activity[GO:0003824]	NA	NA
TR41472|c2_g2_i3	64.5575	136.994	1.08546	0.0132665	0.718159	No	PREDICTED: uncharacterized protein LOC105172566 isoform X1	Sesamum indicum	NA	NA	NA	NA	NA
TR36250|c0_g1_i2	982.057	2081.49	1.08374	0.00261441	0.3572	No	PREDICTED: putative ion channel POLLUX-like 2 isoform X2	Sesamum indicum	NA	NA	NA	NA	NA
TR36913|c1_g3_i4	74.339	157.441	1.08262	0.0106978	0.6775	No	NA	NA	NA	NA	NA	NA	NA
TR37650|c2_g1_i17	471.466	997.807	1.08161	0.00184281	0.280873	No	PREDICTED: protein ROOT HAIR DEFECTIVE 3 homolog 2 isoform X3	Sesamum indicum	NA	NA	NA	NA	NA
TR37065|c3_g1_i1	86.0767	181.977	1.08006	0.00845072	0.617263	No	cytochrome p450 monoxygenase	Cucumis sativus	NA	oxidation-reduction process[GO:0055114]	heme binding[GO:0020037] ; oxidoreductase activity, acting on paired donors, with incorporation or reduction of molecular oxygen[GO:0016705] ; monooxygenase activity[GO:0004497] ; iron ion binding[GO:0005506]	NA	NA
TR34959|c0_g1_i1	91.9456	194.245	1.07903	0.00760628	0.60451	No	PREDICTED: probable mitochondrial chaperone bcs1	Nicotiana sylvestris	NA	NA	NA	NA	NA
TR39326|c0_g2_i11	91.9456	194.245	1.07903	0.00760628	0.60381	No	PREDICTED: mitogen-activated protein kinase 3	Sesamum indicum	NA	NA	NA	NA	NA
TR42595|c0_g2_i1	293.443	619.54	1.07812	0.0021772	0.319759	No	PREDICTED: mechanosensitive ion channel protein 2, chloroplastic-like	Sesamum indicum	NA	NA	NA	NA	NA
TR43326|c0_g5_i3	197.585	417.116	1.07797	0.00295404	0.382281	No	luminal-binding protein 5, partial	Genlisea aurea	NA	NA	ATP binding[GO:0005524]	NA	NA
TR29166|c0_g1_i6	105.64	222.871	1.07706	0.00617566	0.540958	No	PREDICTED: peptidyl-prolyl cis-trans isomerase CYP38, chloroplastic isoform X2	Sesamum indicum	NA	NA	NA	NA	NA
TR14349|c0_g2_i1	127.159	267.854	1.07482	0.00490014	0.492795	No	NA	NA	NA	NA	NA	NA	NA
TR30927|c2_g1_i3	2232.13	4684.38	1.06944	0.00798328	0.609743	No	PREDICTED: phosphoglycolate phosphatase 1B, chloroplastic-like	Sesamum indicum	NA	NA	NA	NA	NA
TR37602|c0_g5_i1	8108.82	17013.8	1.06915	0.0602637	1.062	No	hypothetical protein MIMGU_mgv1a001101mg	Mimulus guttatus	NA	protein folding[GO:0006457] ; response to stress[GO:0006950]	ATP binding[GO:0005524] ; unfolded protein binding[GO:0051082]	NA	NA
TR44651|c1_g2_i1	5481.52	11474.8	1.06582	0.0332924	0.93891	No	PREDICTED: ferredoxin-dependent glutamate synthase, chloroplastic	Sesamum indicum	NA	NA	NA	NA	NA
TR43587|c0_g5_i2	160.416	335.329	1.06376	0.0041302	0.451799	No	ABC Acyl Transporter	Salvia miltiorrhiza	NA	transmembrane transport[GO:0055085] ; metabolic process[GO:0008152]	ATPase activity, coupled to transmembrane movement of substances[GO:0042626] ; ATP binding[GO:0005524]	integral component of membrane[GO:0016021]	NA
TR38300|c0_g1_i1	115.421	241.273	1.06376	0.00608549	0.539955	No	hypothetical protein MIMGU_mgv1a006057mg	Mimulus guttatus	NA	protein phosphorylation[GO:0006468] ; signal transduction[GO:0007165]	ATP binding[GO:0005524] ; protein serine/threonine kinase activity[GO:0004674]	integral component of membrane[GO:0016021]	NA
TR38527|c3_g2_i1	70.4264	147.217	1.06376	0.013431	0.720808	No	PREDICTED: probable trehalose-phosphate phosphatase J	Sesamum indicum	NA	NA	NA	NA	NA
TR42100|c0_g2_i6	70.4264	147.217	1.06376	0.013431	0.719682	No	NA	NA	NA	NA	NA	NA	NA
TR29116|c3_g1_i1	70.4264	147.217	1.06376	0.013431	0.720244	No	NA	NA	NA	NA	NA	NA	NA
TR26901|c0_g2_i1	62.6013	130.86	1.06376	0.0161489	0.780554	No	hypothetical protein MIMGU_mgv1a014456mg	Mimulus guttatus	NA	NA	NA	NA	NA
TR29778|c0_g5_i1	35.2132	73.6087	1.06376	0.0361174	0.956442	No	PREDICTED: LOW QUALITY PROTEIN: DELLA protein GAI	Sesamum indicum	NA	NA	NA	NA	NA
TR42074|c0_g2_i8	35.2132	73.6087	1.06376	0.0361174	0.956073	No	NA	NA	NA	NA	NA	NA	NA
TR44108|c3_g1_i1	35.2132	73.6087	1.06376	0.0361174	0.956812	No	PREDICTED: phosphatidate phosphatase PAH2 isoform X1	Sesamum indicum	NA	NA	NA	NA	NA
TR24434|c0_g1_i1	31.3006	65.43	1.06376	0.041271	0.997412	No	NA	NA	NA	NA	NA	NA	NA
TR31056|c0_g2_i1	31.3006	65.43	1.06376	0.041271	0.997763	No	NA	NA	NA	NA	NA	NA	NA
TR38589|c0_g4_i2	31.3006	65.43	1.06376	0.041271	0.99706	No	AMT1;5	Malus hupehensis var. mengshanensis	NA	ammonium transmembrane transport[GO:0072488]	ammonium transmembrane transporter activity[GO:0008519]	integral component of membrane[GO:0016021]	NA
TR30430|c0_g2_i1	15.6503	32.715	1.06376	0.0589216	1.06181	No	PREDICTED: uncharacterized protein LOC105164887 isoform X2	Sesamum indicum	NA	NA	NA	NA	NA
TR40209|c2_g1_i1	15.6503	32.715	1.06376	0.0589216	1.06125	No	PREDICTED: uncharacterized protein LOC105172763	Sesamum indicum	NA	NA	NA	NA	NA
TR41152|c1_g3_i8	15.6503	32.715	1.06376	0.0589216	1.06377	No	PREDICTED: DELLA protein GAI1	Erythranthe guttatus	NA	NA	NA	NA	NA
TR42587|c2_g1_i5	15.6503	32.715	1.06376	0.0589216	1.06461	No	hypothetical protein MIMGU_mgv1a000798mg	Mimulus guttatus	NA	transcription, DNA-templated[GO:0006351]	DNA-directed RNA polymerase activity[GO:0003899] ; DNA binding[GO:0003677]	NA	map00240:Pyrimidine metabolism(RNA polymerase[ec:2.7.7.6]) ; map00230:Purine metabolism(RNA polymerase[ec:2.7.7.6])
TR43237|c3_g2_i1	15.6503	32.715	1.06376	0.0589216	1.06489	No	AChain A, Crystal Structure Of Lov1 Domain Of Phototropin2 From Arabidopsis Thaliana	Arabidopsis thaliana	NA	NA	NA	NA	NA
TR43426|c0_g4_i4	15.6503	32.715	1.06376	0.0589216	1.06349	No	PREDICTED: dnaJ protein ERDJ2A-like	Sesamum indicum	NA	NA	NA	NA	NA
TR26213|c0_g1_i4	15.6503	32.715	1.06376	0.0589216	1.06433	No	NA	NA	NA	NA	NA	NA	NA
TR40078|c0_g1_i2	15.6503	32.715	1.06376	0.0589216	1.06405	No	PREDICTED: putative phospholipid-transporting ATPase 9	Sesamum indicum	NA	NA	NA	NA	NA
TR41791|c0_g4_i4	15.6503	32.715	1.06376	0.0589216	1.06293	No	PREDICTED: mediator of RNA polymerase II transcription subunit 4	Sesamum indicum	NA	NA	NA	NA	NA
TR42550|c0_g2_i1	15.6503	32.715	1.06376	0.0589216	1.06265	No	PREDICTED: pentatricopeptide repeat-containing protein At5g25630	Sesamum indicum	NA	NA	NA	NA	NA
TR42931|c0_g8_i1	15.6503	32.715	1.06376	0.0589216	1.06237	No	PREDICTED: probable plastid-lipid-associated protein 14, chloroplastic isoform X1	Sesamum indicum	NA	NA	NA	NA	NA
TR42971|c0_g5_i1	15.6503	32.715	1.06376	0.0589216	1.06153	No	AF143202_1starch phosphorylase L	Solanum tuberosum	NA	carbohydrate metabolic process[GO:0005975]	glycogen phosphorylase activity[GO:0008184]	NA	NA
TR43482|c4_g5_i1	15.6503	32.715	1.06376	0.0589216	1.06209	No	PREDICTED: glutathione gamma-glutamylcysteinyltransferase 1 isoform X3	Erythranthe guttatus	NA	NA	NA	NA	NA
TR44252|c0_g1_i6	15.6503	32.715	1.06376	0.0589216	1.06517	No	PREDICTED: bifunctional aspartokinase/homoserine dehydrogenase 1, chloroplastic-like	Sesamum indicum	NA	NA	NA	NA	NA
TR49288|c0_g1_i1	15.6503	32.715	1.06376	0.0589216	1.06321	No	PREDICTED: probable receptor-like serine/threonine-protein kinase At4g34500	Erythranthe guttatus	NA	NA	NA	NA	NA
TR13277|c0_g3_i1	17.6066	36.8044	1.06376	0.0601709	1.06695	No	PREDICTED: lipoxygenase 6, chloroplastic	Sesamum indicum	NA	NA	NA	NA	NA
TR33176|c0_g2_i8	17.6066	36.8044	1.06376	0.0601709	1.06282	No	PREDICTED: glutathione transferase GST 23-like	Sesamum indicum	NA	NA	NA	NA	NA
TR34060|c0_g4_i1	17.6066	36.8044	1.06376	0.0601709	1.06392	No	PREDICTED: probable phospholipase A2 homolog 1	Sesamum indicum	NA	NA	NA	NA	NA
TR35633|c0_g5_i1	17.6066	36.8044	1.06376	0.0601709	1.06447	No	NA	NA	NA	NA	NA	NA	NA
TR37742|c1_g4_i1	17.6066	36.8044	1.06376	0.0601709	1.06667	No	PREDICTED: transcription factor RF2b-like	Sesamum indicum	NA	NA	NA	NA	NA
TR39251|c0_g1_i1	17.6066	36.8044	1.06376	0.0601709	1.06474	No	PREDICTED: uncharacterized protein LOC105167921	Sesamum indicum	NA	NA	NA	NA	NA
TR42259|c2_g4_i1	17.6066	36.8044	1.06376	0.0601709	1.06502	No	PREDICTED: WRKY transcription factor 1-like isoform X2	Sesamum indicum	NA	NA	NA	NA	NA
TR42459|c1_g1_i1	17.6066	36.8044	1.06376	0.0601709	1.0631	No	PREDICTED: uncharacterized protein At1g04910-like isoform X1	Sesamum indicum	NA	NA	NA	NA	NA
TR25814|c1_g1_i3	17.6066	36.8044	1.06376	0.0601709	1.06337	No	NA	NA	NA	NA	NA	NA	NA
TR32013|c0_g1_i3	17.6066	36.8044	1.06376	0.0601709	1.06557	No	hypothetical protein MIMGU_mgv1a008942mg	Mimulus guttatus	NA	NA	NA	NA	NA
TR32632|c0_g1_i4	17.6066	36.8044	1.06376	0.0601709	1.06529	No	NA	NA	NA	NA	NA	NA	NA
TR4070|c0_g1_i1	17.6066	36.8044	1.06376	0.0601709	1.06612	No	NA	NA	NA	NA	NA	NA	NA
TR41261|c0_g2_i2	17.6066	36.8044	1.06376	0.0601709	1.06639	No	PREDICTED: uncharacterized protein LOC105167378	Sesamum indicum	NA	NA	NA	NA	NA
TR42757|c2_g5_i7	17.6066	36.8044	1.06376	0.0601709	1.06584	No	hypothetical protein POPTR_0013s06650g	Populus trichocarpa	NA	drug transmembrane transport[GO:0006855]	antiporter activity[GO:0015297] ; drug transmembrane transporter activity[GO:0015238]	integral component of membrane[GO:0016021]	NA
TR44773|c1_g2_i1	17.6066	36.8044	1.06376	0.0601709	1.06419	No	PREDICTED: uncharacterized protein LOC105948651 isoform X1	Erythranthe guttatus	NA	NA	NA	NA	NA
TR7894|c0_g4_i2	17.6066	36.8044	1.06376	0.0601709	1.06365	No	NA	NA	NA	NA	NA	NA	NA
TR39127|c1_g1_i3	179.979	376.222	1.06376	0.00367534	0.430907	No	PREDICTED: 3-oxoacyl-[acyl-carrier-protein] reductase FabG-like	Solanum lycopersicum	NA	oxidation-reduction process[GO:0055114]	oxidoreductase activity[GO:0016491]	NA	NA
TR40716|c0_g7_i2	123.246	257.631	1.06376	0.00559483	0.524224	No	PREDICTED: probable polygalacturonase	Sesamum indicum	NA	NA	NA	NA	NA
TR41451|c2_g1_i10	103.683	216.737	1.06376	0.00708301	0.5846	No	PREDICTED: uncharacterized protein LOC104239662	Nicotiana sylvestris	NA	NA	NA	NA	NA
TR8220|c0_g3_i2	101.727	212.647	1.06376	0.00729313	0.591269	No	NA	NA	NA	NA	NA	NA	NA
TR39751|c0_g1_i2	68.4701	143.128	1.06376	0.0140555	0.737583	No	cytochrome P450 CYP734A33	Salvia miltiorrhiza	NA	oxidation-reduction process[GO:0055114]	heme binding[GO:0020037] ; oxidoreductase activity, acting on paired donors, with incorporation or reduction of molecular oxygen[GO:0016705] ; monooxygenase activity[GO:0004497] ; iron ion binding[GO:0005506]	integral component of membrane[GO:0016021]	NA
TR36272|c1_g1_i2	68.4701	143.128	1.06376	0.0140555	0.738148	No	PREDICTED: carboxyl-terminal-processing peptidase 2, chloroplastic	Sesamum indicum	NA	NA	NA	NA	NA
TR42550|c0_g5_i1	68.4701	143.128	1.06376	0.0140555	0.738714	No	PREDICTED: pentatricopeptide repeat-containing protein At5g25630	Sesamum indicum	NA	NA	NA	NA	NA
TR28550|c2_g3_i10	66.5138	139.039	1.06376	0.0147161	0.753794	No	hypothetical protein MIMGU_mgv1a012878mg	Mimulus guttatus	NA	NA	NA	NA	NA
TR39534|c4_g1_i2	58.6887	122.681	1.06376	0.0178068	0.791518	No	hypothetical protein MIMGU_mgv1a0189873mg, partial	Mimulus guttatus	NA	metabolic process[GO:0008152]	ATPase activity[GO:0016887] ; ATP binding[GO:0005524]	NA	map00230:Purine metabolism(adenylpyrophosphatase[ec:3.6.1.3])
TR43167|c0_g3_i1	58.6887	122.681	1.06376	0.0178068	0.792031	No	NA	NA	NA	NA	NA	NA	NA
TR37890|c0_g3_i5	58.6887	122.681	1.06376	0.0178068	0.792545	No	NA	NA	NA	NA	NA	NA	NA
TR44214|c1_g1_i1	56.7324	118.592	1.06376	0.018748	0.808721	No	PREDICTED: uncharacterized protein LOC105170357	Sesamum indicum	NA	NA	NA	NA	NA
TR8308|c1_g1_i3	54.7761	114.502	1.06376	0.0197726	0.830463	No	PREDICTED: calcium-transporting ATPase 4, plasma membrane-type-like	Sesamum indicum	NA	NA	NA	NA	NA
TR3338|c0_g1_i4	54.7761	114.502	1.06376	0.0197726	0.829955	No	NA	NA	NA	NA	NA	NA	NA
TR34290|c0_g1_i2	54.7761	114.502	1.06376	0.0197726	0.829447	No	hypothetical protein VITISV_044429	Vitis vinifera	NA	NA	NA	NA	NA
TR34259|c2_g2_i4	52.8198	110.413	1.06376	0.0208878	0.832926	No	hypothetical protein VITISV_011421	Vitis vinifera	NA	NA	NA	NA	NA
TR33584|c0_g1_i3	50.8635	106.324	1.06376	0.0221008	0.854467	No	AP2/EREBP Transcription Factors	Salvia miltiorrhiza	NA	regulation of transcription, DNA-templated[GO:0006355] ; multicellular organismal development[GO:0007275] ; transcription, DNA-templated[GO:0006351]	DNA binding[GO:0003677] ; transcription factor activity, sequence-specific DNA binding[GO:0003700]	nucleus[GO:0005634]	NA
TR38972|c1_g2_i3	50.8635	106.324	1.06376	0.0221008	0.853986	No	PREDICTED: AT-hook motif nuclear-localized protein 11 isoform X1	Erythranthe guttatus	NA	NA	NA	NA	NA
TR35498|c0_g4_i9	48.9072	102.234	1.06376	0.023419	0.858032	No	PREDICTED: uncharacterized protein LOC105159582 isoform X1	Sesamum indicum	NA	NA	NA	NA	NA
TR36418|c0_g1_i1	48.9072	102.234	1.06376	0.023419	0.857574	No	PREDICTED: uncharacterized protein LOC105162013	Sesamum indicum	NA	NA	NA	NA	NA
TR39132|c1_g1_i3	46.9509	98.145	1.06376	0.0248499	0.862978	No	NA	NA	NA	NA	NA	NA	NA
TR39035|c0_g1_i4	46.9509	98.145	1.06376	0.0248499	0.863415	No	endopeptidase 1	Plantago major	NA	proteolysis[GO:0006508]	peptidase activity[GO:0008233]	NA	NA
TR32690|c3_g3_i8	44.9947	94.0556	1.06376	0.0264008	0.879861	No	hypothetical protein PHAVU_002G240900g	Phaseolus vulgaris	NA	NA	NA	NA	NA
TR39532|c0_g2_i5	44.9947	94.0556	1.06376	0.0264008	0.880289	No	PREDICTED: exonuclease 1 isoform X2	Sesamum indicum	NA	NA	NA	NA	NA
TR36859|c1_g4_i1	44.9947	94.0556	1.06376	0.0264008	0.880717	No	PREDICTED: uncharacterized protein LOC105179250 isoform X2	Sesamum indicum	NA	NA	NA	NA	NA
TR38905|c1_g1_i3	43.0384	89.9662	1.06376	0.0280782	0.90286	No	basic helix-loop-helix transcription factor	Salvia miltiorrhiza	NA	NA	protein dimerization activity[GO:0046983]	NA	NA
TR11690|c0_g1_i1	43.0384	89.9662	1.06376	0.0280782	0.903284	No	hypothetical protein AMTR_s00071p00160380	Amborella trichopoda	NA	NA	NA	NA	NA
TR23205|c0_g2_i1	41.0821	85.8769	1.06376	0.0298873	0.930496	No	NA	NA	NA	NA	NA	NA	NA
TR38300|c0_g2_i1	41.0821	85.8769	1.06376	0.0298873	0.930074	No	hypothetical protein MIMGU_mgv1a006057mg	Mimulus guttatus	NA	phosphorylation[GO:0016310]	protein kinase activity[GO:0004672] ; nucleotide binding[GO:0000166]	membrane[GO:0016020]	NA
TR3986|c0_g3_i4	39.1258	81.7875	1.06376	0.0318312	0.932995	No	hypothetical protein MIMGU_mgv1a0091942mg, partial	Mimulus guttatus	NA	metabolic process[GO:0008152]	NA	NA	NA
TR7583|c2_g1_i8	39.1258	81.7875	1.06376	0.0318312	0.933394	No	PREDICTED: protein TIFY 10A-like isoform X2	Sesamum indicum	NA	NA	NA	NA	NA
TR35124|c0_g1_i4	37.1695	77.6981	1.06376	0.0339097	0.941986	No	hypothetical protein JCGZ_04419	Jatropha curcas	NA	carbohydrate metabolic process[GO:0005975]	hydrolase activity, hydrolyzing O-glycosyl compounds[GO:0004553]	NA	NA
TR37620|c4_g8_i1	37.1695	77.6981	1.06376	0.0339097	0.942368	No	NA	NA	NA	NA	NA	NA	NA
TR44690|c1_g1_i1	33.2569	69.5194	1.06376	0.0385196	0.970589	No	PREDICTED: uncharacterized protein LOC105175354	Sesamum indicum	NA	NA	NA	NA	NA
TR36096|c0_g3_i9	29.3443	61.3406	1.06376	0.0443584	0.997838	No	PREDICTED: IAA-amino acid hydrolase ILR1-like 2	Sesamum indicum	NA	NA	NA	NA	NA
TR42550|c0_g3_i2	29.3443	61.3406	1.06376	0.0443584	0.998165	No	PREDICTED: pentatricopeptide repeat-containing protein At5g25630	Sesamum indicum	NA	NA	NA	NA	NA
TR25722|c1_g1_i2	29.3443	61.3406	1.06376	0.0443584	0.998821	No	PREDICTED: inactive poly [ADP-ribose] polymerase RCD1 isoform X1	Sesamum indicum	NA	NA	NA	NA	NA
TR3332|c1_g2_i1	29.3443	61.3406	1.06376	0.0443584	0.998493	No	NA	NA	NA	NA	NA	NA	NA
TR35071|c2_g2_i3	29.3443	61.3406	1.06376	0.0443584	0.999477	No	PREDICTED: ammonium transporter 1 member 2-like	Erythranthe guttatus	NA	NA	NA	NA	NA
TR36910|c1_g2_i1	29.3443	61.3406	1.06376	0.0443584	0.997511	No	hypothetical protein CISIN_1g022057mg	Citrus sinensis	NA	lysine biosynthetic process via diaminopimelate[GO:0009089] ; oxidation-reduction process[GO:0055114]	4-hydroxy-tetrahydrodipicolinate reductase[GO:0008839]	NA	map00261:Monobactam biosynthesis(reductase[ec:1.17.1.8]) ; map01130:Biosynthesis of antibiotics(reductase[ec:1.17.1.8]) ; map00300:Lysine biosynthesis(reductase[ec:1.17.1.8])
TR4029|c0_g1_i1	29.3443	61.3406	1.06376	0.0443584	0.999149	No	PREDICTED: uncharacterized protein LOC105158187	Sesamum indicum	NA	NA	NA	NA	NA
TR38832|c1_g6_i4	27.388	57.2512	1.06376	0.0477248	1.02805	No	hypothetical protein MIMGU_mgv1a012754mg	Mimulus guttatus	NA	NA	NA	NA	NA
TR8297|c2_g2_i3	27.388	57.2512	1.06376	0.0477248	1.02708	No	PREDICTED: uncharacterized protein LOC105160354	Sesamum indicum	NA	NA	NA	NA	NA
TR29079|c0_g3_i1	27.388	57.2512	1.06376	0.0477248	1.02772	No	oxoglutarate-dependent dioxygenase 2	Ocimum basilicum	Lamiaceae	oxidation-reduction process[GO:0055114]	dioxygenase activity[GO:0051213] ; metal ion binding[GO:0046872]	NA	NA
TR42246|c0_g2_i2	27.388	57.2512	1.06376	0.0477248	1.0274	No	PREDICTED: MAP7 domain-containing protein 1	Sesamum indicum	NA	NA	NA	NA	NA
TR31650|c0_g3_i1	11.7377	24.5362	1.06376	0.0487846	1.03144	No	NA	NA	NA	NA	NA	NA	NA
TR35721|c2_g3_i3	11.7377	24.5362	1.06376	0.0487846	1.03335	No	hypothetical protein B456_009G367900	Gossypium raimondii	NA	protoporphyrinogen IX biosynthetic process[GO:0006782]	uroporphyrinogen decarboxylase activity[GO:0004853]	NA	map00860:Porphyrin and chlorophyll metabolism(decarboxylase[ec:4.1.1.37])
TR36375|c1_g3_i1	11.7377	24.5362	1.06376	0.0487846	1.03271	No	NA	NA	NA	NA	NA	NA	NA
TR41478|c0_g2_i1	11.7377	24.5362	1.06376	0.0487846	1.03495	No	hypothetical protein MIMGU_mgv1a004474mg	Mimulus guttatus	NA	metabolic process[GO:0008152]	hydrolase activity[GO:0016787]	integral component of membrane[GO:0016021]	NA
TR42220|c0_g2_i1	11.7377	24.5362	1.06376	0.0487846	1.03591	No	PREDICTED: scarecrow-like protein 30	Sesamum indicum	NA	NA	NA	NA	NA
TR42524|c1_g4_i1	11.7377	24.5362	1.06376	0.0487846	1.03303	No	hypothetical protein MIMGU_mgv1a007010mg	Mimulus guttatus	NA	metabolic process[GO:0008152]	transferase activity, transferring acyl groups[GO:0016746]	NA	NA
TR43361|c0_g2_i2	11.7377	24.5362	1.06376	0.0487846	1.03176	No	hypothetical protein MIMGU_mgv1a0002841mg, partial	Mimulus guttatus	NA	NA	NA	NA	NA
TR15506|c0_g1_i1	11.7377	24.5362	1.06376	0.0487846	1.0388	No	NA	NA	NA	NA	NA	NA	NA
TR20727|c0_g2_i1	11.7377	24.5362	1.06376	0.0487846	1.03559	No	hypothetical protein MIMGU_mgv1a002711mg	Mimulus guttatus	NA	NA	NA	NA	NA
TR2282|c0_g3_i1	11.7377	24.5362	1.06376	0.0487846	1.03687	No	NA	NA	NA	NA	NA	NA	NA
TR2652|c2_g1_i1	11.7377	24.5362	1.06376	0.0487846	1.03784	No	NA	NA	NA	NA	NA	NA	NA
TR27681|c0_g1_i1	11.7377	24.5362	1.06376	0.0487846	1.03399	No	hypothetical protein MIMGU_mgv1a015557mg	Mimulus guttatus	NA	iron-sulfur cluster assembly[GO:0016226]	structural molecule activity[GO:0005198] ; iron-sulfur cluster binding[GO:0051536]	NA	NA
TR3104|c0_g1_i7	11.7377	24.5362	1.06376	0.0487846	1.03816	No	PREDICTED: mannose-1-phosphate guanylyltransferase 1	Sesamum indicum	NA	NA	NA	NA	NA
TR31954|c0_g1_i1	11.7377	24.5362	1.06376	0.0487846	1.03752	No	hypothetical protein PRUPE_ppa013216mg	Prunus persica	NA	NA	NA	integral component of membrane[GO:0016021]	NA
TR40867|c0_g9_i5	11.7377	24.5362	1.06376	0.0487846	1.03463	No	unnamed protein product	Coffea canephora	NA	NA	nucleic acid binding[GO:0003676] ; nucleotide binding[GO:0000166]	NA	NA
TR41758|c0_g1_i2	11.7377	24.5362	1.06376	0.0487846	1.03431	No	NA	NA	NA	NA	NA	NA	NA
TR41863|c1_g5_i3	11.7377	24.5362	1.06376	0.0487846	1.03367	No	unnamed protein product	Coffea canephora	NA	NA	NA	NA	NA
TR42582|c0_g8_i1	11.7377	24.5362	1.06376	0.0487846	1.03527	No	glutamate--tRNA ligase-like protein	Solanum tuberosum	NA	glutamyl-tRNA aminoacylation[GO:0006424]	ATP binding[GO:0005524] ; glutamate-tRNA ligase activity[GO:0004818]	cytoplasm[GO:0005737]	map00860:Porphyrin and chlorophyll metabolism(ligase[ec:6.1.1.17]) ; map00970:Aminoacyl-tRNA biosynthesis(ligase[ec:6.1.1.17])
TR43866|c1_g5_i1	11.7377	24.5362	1.06376	0.0487846	1.03623	No	PREDICTED: G-type lectin S-receptor-like serine/threonine-protein kinase At2g19130	Sesamum indicum	NA	NA	NA	NA	NA
TR44301|c1_g6_i1	11.7377	24.5362	1.06376	0.0487846	1.03655	No	hypothetical protein CISIN_1g007182mg	Citrus sinensis	NA	phosphatidylinositol phosphorylation[GO:0046854]	phosphatidylinositol phosphate kinase activity[GO:0016307]	NA	NA
TR7983|c0_g5_i1	11.7377	24.5362	1.06376	0.0487846	1.03239	No	NA	NA	NA	NA	NA	NA	NA
TR36738|c0_g1_i4	11.7377	24.5362	1.06376	0.0487846	1.03208	No	PREDICTED: tyrosine--tRNA ligase, cytoplasmic	Sesamum indicum	NA	NA	NA	NA	NA
TR43489|c0_g8_i1	11.7377	24.5362	1.06376	0.0487846	1.03848	No	PREDICTED: F-box/LRR-repeat protein 3	Sesamum indicum	NA	NA	NA	NA	NA
TR8265|c1_g1_i1	11.7377	24.5362	1.06376	0.0487846	1.03719	No	NA	NA	NA	NA	NA	NA	NA
TR40304|c1_g2_i8	25.4318	53.1619	1.06376	0.0512499	1.05242	No	PREDICTED: crocetin glucosyltransferase, chloroplastic-like, partial	Sesamum indicum	NA	NA	NA	NA	NA
TR41177|c0_g3_i1	25.4318	53.1619	1.06376	0.0512499	1.05495	No	PREDICTED: GDSL esterase/lipase At1g29670-like	Sesamum indicum	NA	NA	NA	NA	NA
TR7986|c0_g2_i1	25.4318	53.1619	1.06376	0.0512499	1.05431	No	PREDICTED: dihydrolipoyl dehydrogenase 2, chloroplastic	Erythranthe guttatus	NA	NA	NA	NA	NA
TR23852|c0_g1_i2	25.4318	53.1619	1.06376	0.0512499	1.054	No	NA	NA	NA	NA	NA	NA	NA
TR23950|c1_g1_i1	25.4318	53.1619	1.06376	0.0512499	1.05337	No	Disease resistance family protein / LRR family protein, putative	Theobroma cacao	NA	NA	NA	NA	NA
TR2850|c1_g4_i4	25.4318	53.1619	1.06376	0.0512499	1.05526	No	PREDICTED: uncharacterized protein LOC105173228	Sesamum indicum	NA	NA	NA	NA	NA
TR29492|c0_g1_i2	25.4318	53.1619	1.06376	0.0512499	1.05463	No	PREDICTED: SKP1-like protein 21-like isoform 2	Solanum lycopersicum	NA	NA	NA	NA	NA
TR41470|c1_g2_i3	25.4318	53.1619	1.06376	0.0512499	1.05368	No	NA	NA	NA	NA	NA	NA	NA
TR33748|c2_g2_i2	25.4318	53.1619	1.06376	0.0512499	1.05273	No	hypothetical protein MIMGU_mgv1a018971mg, partial	Mimulus guttatus	NA	NA	NA	NA	NA
TR43272|c1_g3_i3	25.4318	53.1619	1.06376	0.0512499	1.05305	No	PREDICTED: uncharacterized protein LOC104215963	Nicotiana sylvestris	NA	NA	NA	NA	NA
TR17581|c0_g1_i1	23.4755	49.0725	1.06376	0.054714	1.06671	No	hypothetical protein MIMGU_mgv1a000101mg	Mimulus guttatus	NA	regulation of ARF protein signal transduction[GO:0032012] ; positive regulation of GTPase activity[GO:0043547]	ARF guanyl-nucleotide exchange factor activity[GO:0005086]	NA	NA
TR23971|c0_g1_i1	23.4755	49.0725	1.06376	0.054714	1.0664	No	hypothetical protein MIMGU_mgv1a006350mg	Mimulus guttatus	NA	NA	NA	NA	NA
TR40060|c0_g2_i3	23.4755	49.0725	1.06376	0.054714	1.0661	No	PREDICTED: protein trichome birefringence-like 12	Sesamum indicum	NA	NA	NA	NA	NA
TR2694|c2_g2_i1	23.4755	49.0725	1.06376	0.054714	1.0658	No	PREDICTED: uncharacterized protein LOC103401619	Malus domestica	NA	NA	NA	NA	NA
TR33702|c0_g4_i5	23.4755	49.0725	1.06376	0.054714	1.06701	No	PREDICTED: salicylate carboxymethyltransferase-like	Sesamum indicum	NA	NA	NA	NA	NA
TR37675|c2_g5_i1	23.4755	49.0725	1.06376	0.054714	1.06519	No	hypothetical protein MIMGU_mgv1a010546mg	Mimulus guttatus	NA	NA	NA	NA	NA
TR37993|c1_g2_i5	23.4755	49.0725	1.06376	0.054714	1.06549	No	PREDICTED: probable serine/threonine-protein kinase Cx32, chloroplastic isoform X2	Sesamum indicum	NA	NA	NA	NA	NA
TR1699|c0_g1_i1	13.694	28.6256	1.06376	0.0550996	1.06065	No	PREDICTED: CHD3-type chromatin-remodeling factor PICKLE	Sesamum indicum	NA	NA	NA	NA	NA
TR34531|c0_g6_i1	13.694	28.6256	1.06376	0.0550996	1.06274	No	PREDICTED: membrane-anchored ubiquitin-fold protein 3-like	Sesamum indicum	NA	NA	NA	NA	NA
TR43322|c0_g4_i1	13.694	28.6256	1.06376	0.0550996	1.06244	No	hypothetical protein CICLE_v100306172mg, partial	Citrus clementina	NA	NA	NA	NA	NA
TR43941|c0_g17_i3	13.694	28.6256	1.06376	0.0550996	1.05976	No	NA	NA	NA	NA	NA	NA	NA
TR25586|c1_g4_i1	13.694	28.6256	1.06376	0.0550996	1.06185	No	NA	NA	NA	NA	NA	NA	NA
TR29253|c0_g3_i3	13.694	28.6256	1.06376	0.0550996	1.06155	No	NA	NA	NA	NA	NA	NA	NA
TR30189|c1_g1_i2	13.694	28.6256	1.06376	0.0550996	1.06125	No	PREDICTED: LOW QUALITY PROTEIN: uncharacterized protein LOC105157180	Sesamum indicum	NA	NA	NA	NA	NA
TR32885|c0_g11_i1	13.694	28.6256	1.06376	0.0550996	1.05917	No	hypothetical protein MIMGU_mgv1a017542mg	Mimulus guttatus	NA	NA	NA	NA	NA
TR37493|c0_g3_i1	13.694	28.6256	1.06376	0.0550996	1.05858	No	PREDICTED: uncharacterized protein LOC105168317	Sesamum indicum	NA	NA	NA	NA	NA
TR38747|c0_g6_i1	13.694	28.6256	1.06376	0.0550996	1.05828	No	hypothetical protein MIMGU_mgv1a007527mg	Mimulus guttatus	NA	NA	NA	NA	NA
TR40295|c0_g3_i1	13.694	28.6256	1.06376	0.0550996	1.05798	No	NA	NA	NA	NA	NA	NA	NA
TR42547|c0_g2_i4	13.694	28.6256	1.06376	0.0550996	1.05887	No	NA	NA	NA	NA	NA	NA	NA
TR42757|c2_g4_i1	13.694	28.6256	1.06376	0.0550996	1.06006	No	PREDICTED: protein TRANSPARENT TESTA 12-like	Erythranthe guttatus	NA	NA	NA	NA	NA
TR44365|c4_g2_i1	13.694	28.6256	1.06376	0.0550996	1.05947	No	PREDICTED: suppressor of RPS4-RLD 1	Sesamum indicum	NA	NA	NA	NA	NA
TR28255|c0_g2_i1	13.694	28.6256	1.06376	0.0550996	1.06036	No	hypothetical protein CARUB_v10009987mg	Capsella rubella	NA	NA	NA	NA	NA
TR33681|c0_g2_i1	13.694	28.6256	1.06376	0.0550996	1.06215	No	PREDICTED: uncharacterized protein LOC105158471, partial	Sesamum indicum	NA	NA	NA	NA	NA
TR44133|c1_g2_i6	13.694	28.6256	1.06376	0.0550996	1.06095	No	PREDICTED: glycerophosphodiester phosphodiesterase GDPDL3-like	Sesamum indicum	NA	NA	NA	NA	NA
TR23132|c0_g2_i1	21.5192	44.9831	1.06376	0.0577455	1.05531	No	NA	NA	NA	NA	NA	NA	NA
TR34654|c0_g3_i1	21.5192	44.9831	1.06376	0.0577455	1.05616	No	PREDICTED: scarecrow-like protein 27	Sesamum indicum	NA	NA	NA	NA	NA
TR42612|c2_g4_i1	21.5192	44.9831	1.06376	0.0577455	1.05475	No	Calmodulin-domain protein kinase 5 isoform 1	Theobroma cacao	NA	NA	NA	NA	NA
TR10069|c0_g2_i1	21.5192	44.9831	1.06376	0.0577455	1.0556	No	PREDICTED: two-component response regulator ARR2	Sesamum indicum	NA	NA	NA	NA	NA
TR21965|c0_g2_i1	21.5192	44.9831	1.06376	0.0577455	1.05503	No	NA	NA	NA	NA	NA	NA	NA
TR34854|c1_g1_i1	21.5192	44.9831	1.06376	0.0577455	1.05447	No	Pyruvate Dehydrogenase beta subunit	Salvia miltiorrhiza	NA	NA	NA	NA	NA
TR40863|c0_g1_i9	21.5192	44.9831	1.06376	0.0577455	1.05588	No	quercetin 3-O-glucoside-6''-O-malonyltransferase	Glandularia x hybrida	NA	NA	NA	NA	NA
TR44587|c1_g2_i1	21.5192	44.9831	1.06376	0.0577455	1.05644	No	NA	NA	NA	NA	NA	NA	NA
TR40302|c5_g2_i1	21.5192	44.9831	1.06376	0.0577455	1.05419	No	NA	NA	NA	NA	NA	NA	NA
TR26421|c0_g1_i2	19.5629	40.8937	1.06376	0.0597529	1.06698	No	PREDICTED: probable serine/threonine-protein kinase At1g54610	Sesamum indicum	NA	NA	NA	NA	NA
TR2956|c0_g1_i2	19.5629	40.8937	1.06376	0.0597529	1.06476	No	PREDICTED: dnaJ homolog 1, mitochondrial-like, partial	Sesamum indicum	NA	NA	NA	NA	NA
TR31494|c0_g5_i1	19.5629	40.8937	1.06376	0.0597529	1.06643	No	PREDICTED: minor allergen Alt a 7	Eucalyptus grandis	NA	negative regulation of transcription, DNA-templated[GO:0045892] ; oxidation-reduction process[GO:0055114]	oxidoreductase activity[GO:0016491] ; FMN binding[GO:0010181]	NA	NA
TR42061|c0_g5_i1	19.5629	40.8937	1.06376	0.0597529	1.06726	No	hypothetical protein MIMGU_mgv1a021763mg, partial	Mimulus guttatus	NA	NA	NA	NA	NA
TR23466|c0_g2_i1	19.5629	40.8937	1.06376	0.0597529	1.06615	No	PREDICTED: reticuline oxidase-like protein	Sesamum indicum	NA	NA	NA	NA	NA
TR34583|c1_g2_i1	19.5629	40.8937	1.06376	0.0597529	1.06532	No	NA	NA	NA	NA	NA	NA	NA
TR37427|c0_g2_i1	19.5629	40.8937	1.06376	0.0597529	1.06504	No	NA	NA	NA	NA	NA	NA	NA
TR38084|c1_g5_i9	19.5629	40.8937	1.06376	0.0597529	1.06559	No	NA	NA	NA	NA	NA	NA	NA
TR50555|c0_g1_i1	19.5629	40.8937	1.06376	0.0597529	1.06587	No	NA	NA	NA	NA	NA	NA	NA
TR30531|c1_g1_i2	19.5629	40.8937	1.06376	0.0597529	1.0667	No	NA	NA	NA	NA	NA	NA	NA
TR31239|c0_g4_i1	9.78145	20.4469	1.06376	0.0763619	1.1108	No	PREDICTED: maf-like protein DDB_G0281937 isoform X3	Sesamum indicum	NA	NA	NA	NA	NA
TR43953|c1_g1_i1	9.78145	20.4469	1.06376	0.0763619	1.11033	No	NA	NA	NA	NA	NA	NA	NA
TR32286|c0_g2_i2	9.78145	20.4469	1.06376	0.0763619	1.10939	No	PREDICTED: uncharacterized protein At1g04910	Sesamum indicum	NA	NA	NA	NA	NA
TR34298|c1_g4_i1	9.78145	20.4469	1.06376	0.0763619	1.10963	No	NA	NA	NA	NA	NA	NA	NA
TR38360|c0_g2_i1	9.78145	20.4469	1.06376	0.0763619	1.11057	No	hypothetical protein MIMGU_mgv1a010259mg	Mimulus guttatus	NA	NA	NA	integral component of membrane[GO:0016021]	NA
TR42231|c0_g3_i1	9.78145	20.4469	1.06376	0.0763619	1.10986	No	chloroplast FtsZ-like protein	Nicotiana tabacum	NA	microtubule-based process[GO:0007017] ; metabolic process[GO:0008152]	GTP binding[GO:0005525] ; GTPase activity[GO:0003924]	cytoplasm[GO:0005737] ; microtubule[GO:0005874]	NA
TR38526|c0_g2_i13	9.78145	20.4469	1.06376	0.0763619	1.1101	No	hypothetical protein VITISV_030117	Vitis vinifera	NA	NA	NA	NA	NA
TR38928|c0_g1_i10	416.69	868.992	1.06037	0.00227156	0.327309	No	hypothetical protein MIMGU_mgv1a002308mg	Mimulus guttatus	NA	carbohydrate metabolic process[GO:0005975]	carbohydrate binding[GO:0030246] ; beta-galactosidase activity[GO:0004565]	NA	map00511:Other glycan degradation(lactase (ambiguous)[ec:3.2.1.23]) ; map00604:Glycosphingolipid biosynthesis - ganglio series(lactase (ambiguous)[ec:3.2.1.23]) ; map00600:Sphingolipid metabolism(lactase (ambiguous)[ec:3.2.1.23]) ; map00531:Glycosaminoglycan degradation(lactase (ambiguous)[ec:3.2.1.23]) ; map00052:Galactose metabolism(lactase (ambiguous)[ec:3.2.1.23])
TR2741|c1_g1_i4	228.886	476.412	1.05758	0.00313366	0.392205	No	NA	NA	NA	NA	NA	NA	NA
TR37104|c1_g1_i1	195.629	406.893	1.05653	0.00362485	0.425715	No	hypothetical protein MIMGU_mgv1a005428mg	Mimulus guttatus	NA	metabolic process[GO:0008152]	pyridoxal phosphate binding[GO:0030170] ; transaminase activity[GO:0008483]	NA	NA
TR38930|c0_g1_i3	369.739	768.802	1.05611	0.0024284	0.340607	No	hypothetical protein VITISV_020570	Vitis vinifera	NA	metabolic process[GO:0008152]	ATPase activity[GO:0016887] ; ATP binding[GO:0005524]	integral component of membrane[GO:0016021]	map00230:Purine metabolism(adenylpyrophosphatase[ec:3.6.1.3])
TR43235|c3_g1_i1	168.241	349.642	1.05535	0.00423483	0.462507	No	PREDICTED: probable disease resistance protein At4g27220-like isoform X5	Citrus sinensis	NA	NA	NA	NA	NA
TR33118|c0_g1_i6	166.285	345.552	1.05525	0.00428901	0.464724	No	putative expansin	Capsicum annuum	NA	plant-type cell wall organization[GO:0009664]	NA	extracellular region[GO:0005576] ; cell wall[GO:0005618] ; membrane[GO:0016020]	NA
TR42595|c0_g2_i2	148.678	308.748	1.05424	0.00486885	0.491812	No	PREDICTED: mechanosensitive ion channel protein 2, chloroplastic-like	Sesamum indicum	NA	NA	NA	NA	NA
TR36096|c0_g2_i1	115.421	239.228	1.05148	0.00673243	0.564495	No	PREDICTED: IAA-amino acid hydrolase ILR1-like 2	Sesamum indicum	NA	NA	NA	NA	NA
TR42912|c0_g1_i1	107.596	222.871	1.05059	0.00746152	0.598554	No	PREDICTED: calcium-transporting ATPase 2, plasma membrane-type-like	Sesamum indicum	NA	NA	NA	NA	NA
TR3877|c0_g2_i2	105.64	218.782	1.05034	0.00767774	0.605279	No	PREDICTED: transmembrane protein DDB_G0273707/DDB_G0273361-like	Sesamum indicum	NA	NA	NA	NA	NA
TR28209|c0_g1_i2	97.8145	202.424	1.04926	0.00870663	0.616902	No	PREDICTED: synaptotagmin-3	Sesamum indicum	NA	NA	NA	NA	NA
TR30798|c0_g7_i1	266.055	550.021	1.04776	0.00307519	0.392771	No	NA	NA	NA	NA	NA	NA	NA
TR44685|c0_g1_i3	86.0767	177.888	1.04727	0.0108763	0.673262	No	PREDICTED: nuclear-pore anchor	Sesamum indicum	NA	NA	NA	NA	NA
TR39004|c0_g1_i7	168.241	347.597	1.04689	0.00456146	0.478375	No	PREDICTED: bifunctional riboflavin kinase/FMN phosphatase-like isoform X2	Sesamum indicum	NA	NA	NA	NA	NA
TR32032|c1_g1_i10	324.744	670.657	1.04627	0.00279446	0.369294	No	NA	NA	NA	NA	NA	NA	NA
TR35827|c0_g3_i2	154.547	318.971	1.04538	0.00504127	0.497504	No	NA	NA	NA	NA	NA	NA	NA
TR41104|c2_g1_i1	72.3827	149.262	1.04413	0.0147697	0.754289	No	tyrosine aminotransferase	Solenostemon scutellarioides	NA	cellular amino acid metabolic process[GO:0006520] ; biosynthetic process[GO:0009058]	pyridoxal phosphate binding[GO:0030170] ; L-tyrosine:2-oxoglutarate aminotransferase activity[GO:0004838] ; L-phenylalanine:2-oxoglutarate aminotransferase activity[GO:0080130]	NA	map00130:Ubiquinone and other terpenoid-quinone biosynthesis(transaminase[ec:2.6.1.5]) ; map00350:Tyrosine metabolism(transaminase[ec:2.6.1.57]) ; map00350:Tyrosine metabolism(transaminase[ec:2.6.1.9]) ; map00350:Tyrosine metabolism(transaminase[ec:2.6.1.5]) ; map00350:Tyrosine metabolism(transaminase[ec:2.6.1.1]) ; map00220:Arginine biosynthesis(transaminase[ec:2.6.1.1]) ; map00950:Isoquinoline …
TR35701|c0_g1_i1	211.279	435.518	1.04358	0.00380514	0.440107	No	PREDICTED: probable zinc metallopeptidase EGY3, chloroplastic	Sesamum indicum	NA	NA	NA	NA	NA
TR35895|c0_g1_i5	70.4264	145.173	1.04358	0.0154814	0.76888	No	PREDICTED: pentatricopeptide repeat-containing protein At2g30780-like isoform X1	Sesamum indicum	NA	NA	NA	NA	NA
TR2690|c0_g1_i1	68.4701	141.083	1.043	0.0162379	0.777729	No	hypothetical protein MIMGU_mgv1a003201mg	Mimulus guttatus	NA	NA	metal ion binding[GO:0046872]	NA	NA
TR37602|c0_g4_i1	203.454	419.161	1.0428	0.00395969	0.440167	No	PREDICTED: endoplasmin homolog, partial	Nicotiana tomentosiformis	NA	NA	NA	NA	NA
TR8205|c1_g6_i1	66.5138	136.994	1.04239	0.0170409	0.789184	No	hypothetical protein CISIN_1g0045481mg, partial	Citrus sinensis	NA	ion transmembrane transport[GO:0034220] ; regulation of ion transmembrane transport[GO:0034765]	voltage-gated ion channel activity[GO:0005244] ; calcium ion binding[GO:0005509]	integral component of membrane[GO:0016021]	NA
TR37689|c0_g3_i8	66.5138	136.994	1.04239	0.0170409	0.788652	No	PREDICTED: uncharacterized protein LOC105159863	Sesamum indicum	NA	NA	NA	NA	NA
TR36091|c0_g1_i5	127.159	261.72	1.04139	0.00648855	0.552832	No	hypothetical protein MIMGU_mgv1a009103mg	Mimulus guttatus	NA	transmembrane transport[GO:0055085]	transmembrane transporter activity[GO:0022857]	integral component of membrane[GO:0016021]	NA
TR32315|c0_g1_i1	2179.31	4484	1.04092	0.00928584	0.63372	No	PREDICTED: dirigent protein 21-like	Sesamum indicum	NA	NA	NA	NA	NA
TR32974|c0_g4_i7	60.645	124.726	1.0403	0.0197831	0.829379	No	hypothetical protein M569_03477	Genlisea aurea	NA	NA	NA	NA	NA
TR43771|c1_g1_i2	60.645	124.726	1.0403	0.0197831	0.828873	No	hypothetical protein MIMGU_mgv11b008016mg	Mimulus guttatus	NA	NA	NA	NA	NA
TR7986|c0_g2_i2	58.6887	120.637	1.03951	0.02086	0.83473	No	PREDICTED: dihydrolipoyl dehydrogenase 2, chloroplastic	Erythranthe guttatus	NA	NA	NA	NA	NA
TR33665|c0_g1_i4	56.7324	116.547	1.03867	0.0220364	0.854388	No	NA	NA	NA	NA	NA	NA	NA
TR7334|c0_g1_i2	56.7324	116.547	1.03867	0.0220364	0.853905	No	PREDICTED: molybdate-anion transporter	Sesamum indicum	NA	NA	NA	NA	NA
TR44246|c1_g2_i2	105.64	216.737	1.03679	0.00855736	0.617814	No	PREDICTED: elongation factor G-1, chloroplastic	Sesamum indicum	NA	NA	NA	NA	NA
TR36728|c0_g6_i2	410.821	842.411	1.03602	0.0028595	0.375717	No	hypothetical protein MIMGU_mgv1a010637mg	Mimulus guttatus	NA	regulation of transcription, DNA-templated[GO:0006355]	protein dimerization activity[GO:0046983] ; transcription factor activity, sequence-specific DNA binding[GO:0003700]	nucleus[GO:0005634]	NA
TR35135|c0_g1_i8	101.727	208.558	1.03575	0.00912093	0.628089	No	PREDICTED: uncharacterized protein LOC105178714	Sesamum indicum	NA	NA	NA	NA	NA
TR24980|c0_g1_i1	50.8635	104.279	1.03575	0.0262597	0.879429	No	PREDICTED: transmembrane emp24 domain-containing protein p24delta9-like	Sesamum indicum	NA	NA	NA	NA	NA
TR44797|c2_g7_i1	50.8635	104.279	1.03575	0.0262597	0.879859	No	PREDICTED: zinc finger CCCH domain-containing protein 44-like isoform X1	Sesamum indicum	NA	NA	NA	NA	NA
TR7910|c0_g1_i1	244.536	500.948	1.03461	0.00367713	0.430381	No	PREDICTED: glutamate--glyoxylate aminotransferase 2-like	Brassica rapa	NA	NA	NA	NA	NA
TR33640|c0_g1_i1	48.9072	100.19	1.03461	0.0279348	0.901205	No	NA	NA	NA	NA	NA	NA	NA
TR32885|c0_g7_i1	46.9509	96.1003	1.03339	0.0297631	0.927469	No	hypothetical protein MIMGU_mgv1a017542mg	Mimulus guttatus	NA	NA	NA	NA	NA
TR40797|c0_g1_i3	46.9509	96.1003	1.03339	0.0297631	0.927891	No	hypothetical protein MIMGU_mgv1a001159mg	Mimulus guttatus	NA	NA	NA	NA	NA
TR42841|c0_g2_i2	46.9509	96.1003	1.03339	0.0297631	0.928313	No	PREDICTED: LOW QUALITY PROTEIN: probable acyl-activating enzyme 16, chloroplastic	Sesamum indicum	NA	NA	NA	NA	NA
TR30763|c0_g1_i5	91.9456	188.111	1.03273	0.010918	0.673408	No	PREDICTED: serine/threonine-protein kinase BRI1-like 2	Erythranthe guttatus	NA	NA	NA	NA	NA
TR42649|c2_g2_i1	320.831	656.345	1.03264	0.00318938	0.389928	No	PREDICTED: protein SIEVE ELEMENT OCCLUSION B	Erythranthe guttatus	NA	NA	NA	NA	NA
TR4081|c0_g2_i5	89.9893	184.022	1.03205	0.0113568	0.685676	No	hypothetical protein MIMGU_mgv11b012645mg	Mimulus guttatus	NA	NA	NA	NA	NA
TR37732|c0_g1_i6	44.9947	92.0109	1.03205	0.0317569	0.933211	No	NA	NA	NA	NA	NA	NA	NA
TR31463|c0_g1_i3	133.028	271.943	1.03158	0.00667715	0.561921	No	PREDICTED: uncharacterized protein LOC105171337	Sesamum indicum	NA	NA	NA	NA	NA
TR35827|c0_g3_i1	434.296	887.394	1.0309	0.00297511	0.384282	No	PREDICTED: 1-aminocyclopropane-1-carboxylate oxidase	Sesamum indicum	NA	NA	NA	NA	NA
TR40796|c0_g3_i1	86.0767	175.843	1.03059	0.0123291	0.706447	No	hypothetical protein MIMGU_mgv1a006155mg	Mimulus guttatus	NA	glycerolipid biosynthetic process[GO:0045017]	diacylglycerol O-acyltransferase activity[GO:0004144]	NA	map00073:Cutin, suberine and wax biosynthesis(O-acyltransferase[ec:2.3.1.20]) ; map00561:Glycerolipid metabolism(O-acyltransferase[ec:2.3.1.20])
TR42666|c0_g7_i2	43.0384	87.9216	1.03059	0.0339286	0.939089	No	hypothetical protein MIMGU_mgv1a002810mg	Mimulus guttatus	NA	NA	NA	NA	NA
TR33606|c1_g6_i2	162.372	331.239	1.02857	0.00553755	0.523868	No	NA	NA	NA	NA	NA	NA	NA
TR26775|c0_g1_i2	117.377	239.228	1.02723	0.00802466	0.607491	No	PREDICTED: uncharacterized protein LOC101256982	Solanum lycopersicum	NA	NA	NA	NA	NA
TR34514|c0_g1_i2	39.1258	79.7428	1.02723	0.0388511	0.973934	No	hypothetical protein CISIN_1g018472mg	Citrus sinensis	NA	nucleotide biosynthetic process[GO:0009165] ; phosphorylation[GO:0016310] ; ribonucleoside monophosphate biosynthetic process[GO:0009156] ; nucleoside metabolic process[GO:0009116]	kinase activity[GO:0016301] ; ribose phosphate diphosphokinase activity[GO:0004749] ; magnesium ion binding[GO:0000287]	NA	map00030:Pentose phosphate pathway(diphosphokinase[ec:2.7.6.1]) ; map01130:Biosynthesis of antibiotics(diphosphokinase[ec:2.7.6.1]) ; map00230:Purine metabolism(diphosphokinase[ec:2.7.6.1])
TR40375|c0_g1_i4	39.1258	79.7428	1.02723	0.0388511	0.973578	No	PREDICTED: zinc finger Ran-binding domain-containing protein 2-like isoform X1	Sesamum indicum	NA	NA	NA	NA	NA
TR3601|c0_g2_i4	111.508	226.96	1.02529	0.0087014	0.617809	No	PREDICTED: dynamin-related protein 1E	Sesamum indicum	NA	NA	NA	NA	NA
TR37250|c0_g2_i3	74.339	151.307	1.02529	0.0161712	0.77998	No	PREDICTED: calcium uptake protein 1, mitochondrial	Sesamum indicum	NA	NA	NA	NA	NA
TR41730|c0_g2_i1	74.339	151.307	1.02529	0.0161712	0.780529	No	PREDICTED: uncharacterized protein LOC105166786 isoform X1	Sesamum indicum	NA	NA	NA	NA	NA
TR32192|c3_g5_i4	37.1695	75.6534	1.02529	0.0416203	0.991874	No	hypothetical protein MIMGU_mgv1a006554mg	Mimulus guttatus	NA	pectin catabolic process[GO:0045490]	metal ion binding[GO:0046872] ; pectate lyase activity[GO:0030570]	NA	map00040:Pentose and glucuronate interconversions(lyase[ec:4.2.2.2])
TR41363|c0_g1_i4	37.1695	75.6534	1.02529	0.0416203	0.992218	No	PREDICTED: F-box/LRR-repeat protein 12	Sesamum indicum	NA	NA	NA	NA	NA
TR40088|c0_g1_i3	37.1695	75.6534	1.02529	0.0416203	0.991529	No	PREDICTED: uncharacterized protein LOC105163859	Sesamum indicum	NA	NA	NA	NA	NA
TR34230|c0_g1_i2	35.2132	71.5641	1.02312	0.0446037	0.990684	No	hypothetical protein MIMGU_mgv1a003894mg	Mimulus guttatus	NA	transmembrane transport[GO:0055085]	NA	integral component of membrane[GO:0016021]	NA
TR30782|c1_g3_i1	35.2132	71.5641	1.02312	0.0446037	0.991326	No	NA	NA	NA	NA	NA	NA	NA
TR34102|c0_g2_i5	35.2132	71.5641	1.02312	0.0446037	0.990363	No	PREDICTED: RING-H2 finger protein ATL54	Vitis vinifera	NA	NA	NA	NA	NA
TR37890|c0_g1_i3	35.2132	71.5641	1.02312	0.0446037	0.991004	No	PREDICTED: potassium transporter 6-like isoform X2	Fragaria vesca subsp. vesca	NA	NA	NA	NA	NA
TR43145|c1_g3_i5	68.4701	139.039	1.02194	0.018743	0.809014	No	PREDICTED: ferredoxin--nitrite reductase, chloroplastic	Sesamum indicum	NA	NA	NA	NA	NA
TR36925|c0_g3_i1	168.241	341.463	1.0212	0.0056972	0.529477	No	NA	NA	NA	NA	NA	NA	NA
TR34395|c1_g3_i1	166.285	337.373	1.02069	0.0057869	0.530623	No	hypothetical protein MIMGU_mgv1a011904mg	Mimulus guttatus	NA	NA	NA	NA	NA
TR33763|c0_g1_i4	66.5138	134.949	1.02069	0.0197151	0.833661	No	PREDICTED: phototropin-2 isoform X2	Sesamum indicum	NA	NA	NA	NA	NA
TR39044|c0_g2_i3	66.5138	134.949	1.02069	0.0197151	0.83469	No	PREDICTED: uncharacterized protein LOC105958395 isoform X2	Erythranthe guttatus	NA	NA	NA	NA	NA
TR44215|c1_g8_i5	66.5138	134.949	1.02069	0.0197151	0.834175	No	hypothetical protein MIMGU_mgv1a001573mg	Mimulus guttatus	NA	metabolic process[GO:0008152]	catalytic activity[GO:0003824]	NA	NA
TR38874|c0_g5_i1	33.2569	67.4747	1.02069	0.0479734	1.0292	No	NA	NA	NA	NA	NA	NA	NA
TR44183|c1_g9_i1	33.2569	67.4747	1.02069	0.0479734	1.02952	No	NA	NA	NA	NA	NA	NA	NA
TR30576|c0_g2_i2	33.2569	67.4747	1.02069	0.0479734	1.02888	No	uncharacterized protein LOC100384840	Zea mays	NA	intracellular protein transport[GO:0006886]	NA	cytoplasm[GO:0005737]	NA
TR43326|c0_g5_i1	2130.4	4320.42	1.02005	0.0103118	0.669117	No	PREDICTED: luminal-binding protein 5	Sesamum indicum	NA	NA	NA	NA	NA
TR37696|c2_g2_i4	64.5575	130.86	1.01937	0.0207488	0.835153	No	PREDICTED: desumoylating isopeptidase 1	Sesamum indicum	NA	NA	NA	NA	NA
TR33249|c0_g1_i2	62.6013	126.771	1.01796	0.0218616	0.85146	No	PREDICTED: uncharacterized protein LOC105160266 isoform X2	Sesamum indicum	NA	NA	NA	NA	NA
TR42549|c1_g2_i10	62.6013	126.771	1.01796	0.0218616	0.851944	No	NA	NA	NA	NA	NA	NA	NA
TR37902|c0_g3_i6	31.3006	63.3853	1.01796	0.0518479	1.0493	No	hypothetical protein M569_05835, partial	Genlisea aurea	NA	proteolysis[GO:0006508]	serine-type endopeptidase activity[GO:0004252]	integral component of membrane[GO:0016021]	NA
TR39399|c0_g1_i1	31.3006	63.3853	1.01796	0.0518479	1.05054	No	PREDICTED: deoxynucleoside triphosphate triphosphohydrolase SAMHD1 homolog	Sesamum indicum	NA	NA	NA	NA	NA
TR43172|c0_g3_i1	31.3006	63.3853	1.01796	0.0518479	1.04745	No	unnamed protein product	Coffea canephora	NA	MAPK cascade[GO:0000165]	MAP kinase activity[GO:0004707] ; ATP binding[GO:0005524]	intracellular[GO:0005622]	map04150:mTOR signaling pathway(protein kinase[ec:2.7.11.24])
TR8027|c1_g1_i2	31.3006	63.3853	1.01796	0.0518479	1.05085	No	hypothetical protein MIMGU_mgv1a007424mg	Mimulus guttatus	NA	NA	NA	integral component of membrane[GO:0016021]	NA
TR28176|c0_g1_i3	31.3006	63.3853	1.01796	0.0518479	1.04807	No	PREDICTED: uncharacterized protein LOC105171381	Sesamum indicum	NA	NA	NA	NA	NA
TR3119|c2_g1_i3	31.3006	63.3853	1.01796	0.0518479	1.04838	No	NA	NA	NA	NA	NA	NA	NA
TR3357|c3_g2_i3	31.3006	63.3853	1.01796	0.0518479	1.05023	No	unknown	Glycine max	NA	NA	NA	NA	NA
TR37214|c0_g2_i1	31.3006	63.3853	1.01796	0.0518479	1.04992	No	NA	NA	NA	NA	NA	NA	NA
TR38164|c2_g2_i3	31.3006	63.3853	1.01796	0.0518479	1.04714	No	NA	NA	NA	NA	NA	NA	NA
TR40215|c0_g4_i1	31.3006	63.3853	1.01796	0.0518479	1.04961	No	hypothetical protein CISIN_1g0134022mg	Citrus sinensis	NA	carbohydrate metabolic process[GO:0005975] ; cell wall organization[GO:0071555]	polygalacturonase activity[GO:0004650]	extracellular region[GO:0005576]	map00500:Starch and sucrose metabolism(pectin depolymerase[ec:3.2.1.15]) ; map00040:Pentose and glucuronate interconversions(pectin depolymerase[ec:3.2.1.15])
TR40493|c0_g5_i4	31.3006	63.3853	1.01796	0.0518479	1.04868	No	PREDICTED: uncharacterized protein LOC105160853	Sesamum indicum	NA	NA	NA	NA	NA
TR41635|c0_g6_i4	31.3006	63.3853	1.01796	0.0518479	1.04899	No	PREDICTED: zinc finger CCCH domain-containing protein 18 isoform X1	Sesamum indicum	NA	NA	NA	NA	NA
TR7657|c0_g2_i7	31.3006	63.3853	1.01796	0.0518479	1.04776	No	PREDICTED: uncharacterized protein At5g01610-like	Sesamum indicum	NA	NA	NA	NA	NA
TR33095|c0_g6_i4	13230.4	26789.5	1.01781	0.133049	1.18113	No	PREDICTED: carbonic anhydrase, chloroplastic-like isoform X2	Sesamum indicum	NA	NA	NA	NA	NA
TR24206|c0_g1_i1	60.645	122.681	1.01645	0.0230795	0.868324	No	PREDICTED: heat shock 70 kDa protein 17	Sesamum indicum	NA	NA	NA	NA	NA
TR28766|c0_g1_i3	60.645	122.681	1.01645	0.0230795	0.866898	No	telomere repeat-binding factor like-protein	Rehmannia glutinosa	NA	NA	NA	NA	NA
TR37993|c1_g2_i7	60.645	122.681	1.01645	0.0230795	0.867848	No	PREDICTED: probable serine/threonine-protein kinase Cx32, chloroplastic isoform X2	Sesamum indicum	NA	NA	NA	NA	NA
TR2724|c0_g1_i2	60.645	122.681	1.01645	0.0230795	0.868801	No	hypothetical protein MIMGU_mgv1a0234681mg, partial	Mimulus guttatus	NA	NA	NA	NA	NA
TR32471|c0_g1_i12	60.645	122.681	1.01645	0.0230795	0.867373	No	PREDICTED: AT-rich interactive domain-containing protein 4	Sesamum indicum	NA	NA	NA	NA	NA
TR40811|c0_g1_i1	88.033	177.888	1.01485	0.0133749	0.721748	No	PREDICTED: putative receptor-like protein kinase At5g39000	Erythranthe guttatus	NA	NA	NA	NA	NA
TR44075|c1_g6_i1	58.6887	118.592	1.01485	0.0244133	0.86178	No	PREDICTED: probable glucuronoxylan glucuronosyltransferase F8H	Brassica rapa	NA	NA	NA	NA	NA
TR34472|c0_g2_i7	29.3443	59.2959	1.01485	0.0562222	1.06581	No	NA	NA	NA	NA	NA	NA	NA
TR34870|c1_g1_i3	29.3443	59.2959	1.01485	0.0562222	1.06522	No	PREDICTED: uncharacterized protein LOC105168444	Sesamum indicum	NA	NA	NA	NA	NA
TR36889|c1_g3_i2	29.3443	59.2959	1.01485	0.0562222	1.0664	No	hypothetical protein GLYMA_17G253200	Glycine max	NA	NA	NA	NA	NA
TR44738|c7_g1_i2	29.3443	59.2959	1.01485	0.0562222	1.0667	No	hypothetical protein MIMGU_mgv1a000542mg	Mimulus guttatus	NA	protein phosphorylation[GO:0006468]	ATP binding[GO:0005524] ; protein serine/threonine kinase activity[GO:0004674]	integral component of membrane[GO:0016021]	NA
TR2694|c2_g2_i7	29.3443	59.2959	1.01485	0.0562222	1.06699	No	NA	NA	NA	NA	NA	NA	NA
TR36843|c2_g3_i1	29.3443	59.2959	1.01485	0.0562222	1.06611	No	hypothetical protein MIMGU_mgv1a001946mg	Mimulus guttatus	NA	potassium ion transmembrane transport[GO:0071805]	voltage-gated potassium channel activity[GO:0005249]	integral component of membrane[GO:0016021]	NA
TR40581|c0_g4_i3	29.3443	59.2959	1.01485	0.0562222	1.06552	No	hypothetical protein MIMGU_mgv1a010253mg	Mimulus guttatus	NA	transmembrane transport[GO:0055085]	NA	integral component of membrane[GO:0016021]	NA
TR43326|c0_g12_i1	320.831	648.166	1.01455	0.00376565	0.437754	No	NA	NA	NA	NA	NA	NA	NA
TR8164|c0_g3_i1	86.0767	173.798	1.01372	0.0139681	0.735249	No	NA	NA	NA	NA	NA	NA	NA
TR38884|c0_g1_i5	56.7324	114.502	1.01313	0.0258748	0.877249	No	NA	NA	NA	NA	NA	NA	NA
TR42649|c2_g10_i6	727.74	1468.09	1.01244	0.00390301	0.439566	No	hypothetical protein MIMGU_mgv1a002070mg	Mimulus guttatus	NA	NA	NA	NA	NA
TR40234|c2_g2_i3	164.328	331.239	1.01129	0.00634006	0.546975	No	PREDICTED: uncharacterized protein LOC105175605 isoform X1	Sesamum indicum	NA	NA	NA	NA	NA
TR36973|c0_g1_i1	109.552	220.826	1.01129	0.00995074	0.656242	No	PREDICTED: uncharacterized protein LOC105176990 isoform X1	Sesamum indicum	NA	NA	NA	NA	NA
TR2283|c0_g1_i1	27.388	55.2066	1.01129	0.0610476	1.06379	No	PREDICTED: cysteine-rich PDZ-binding protein isoform X1	Sesamum indicum	NA	NA	NA	NA	NA
TR36536|c0_g1_i1	27.388	55.2066	1.01129	0.0610476	1.06325	No	PREDICTED: SPX and EXS domain-containing protein 1-like	Sesamum indicum	NA	NA	NA	NA	NA
TR37895|c0_g1_i3	27.388	55.2066	1.01129	0.0610476	1.06406	No	PREDICTED: acetate/butyrate--CoA ligase AAE7, peroxisomal	Sesamum indicum	NA	NA	NA	NA	NA
TR41413|c1_g5_i1	27.388	55.2066	1.01129	0.0610476	1.06352	No	PREDICTED: uncharacterized protein LOC105169670	Sesamum indicum	NA	NA	NA	NA	NA
TR14887|c0_g1_i1	27.388	55.2066	1.01129	0.0610476	1.06217	No	NA	NA	NA	NA	NA	NA	NA
TR35127|c1_g10_i1	27.388	55.2066	1.01129	0.0610476	1.06298	No	bHLH3 protein	Salvia miltiorrhiza	NA	NA	protein dimerization activity[GO:0046983]	NA	NA
TR43349|c1_g2_i1	27.388	55.2066	1.01129	0.0610476	1.06244	No	PREDICTED: cullin-3A-like	Sesamum indicum	NA	NA	NA	NA	NA
TR7240|c0_g1_i2	27.388	55.2066	1.01129	0.0610476	1.06271	No	PREDICTED: 6-phosphogluconate dehydrogenase, decarboxylating 3	Sesamum indicum	NA	NA	NA	NA	NA
TR36691|c0_g2_i6	78.2516	157.441	1.00862	0.0167967	0.783698	No	PREDICTED: probable galactinol--sucrose galactosyltransferase 2	Sesamum indicum	NA	NA	NA	NA	NA
TR40796|c0_g5_i1	359.957	723.819	1.0078	0.00383033	0.44079	No	NA	NA	NA	NA	NA	NA	NA
TR29628|c0_g4_i1	101.727	204.469	1.00718	0.0113917	0.685368	No	PREDICTED: glutathione transferase GST 23-like	Sesamum indicum	NA	NA	NA	NA	NA
TR38847|c2_g3_i3	50.8635	102.234	1.00718	0.0311608	0.933696	No	NA	NA	NA	NA	NA	NA	NA
TR3986|c0_g3_i9	50.8635	102.234	1.00718	0.0311608	0.933288	No	PREDICTED: short-chain dehydrogenase TIC 32, chloroplastic-like isoform X2	Erythranthe guttatus	NA	NA	NA	NA	NA
TR31982|c0_g2_i1	50.8635	102.234	1.00718	0.0311608	0.934104	No	PREDICTED: probable carbohydrate esterase At4g34215-like	Glycine max	NA	NA	NA	NA	NA
TR21614|c0_g1_i1	25.4318	51.1172	1.00718	0.0662015	1.08548	No	PREDICTED: uncharacterized protein LOC105177625 isoform X2	Sesamum indicum	NA	NA	NA	NA	NA
TR21702|c0_g1_i1	25.4318	51.1172	1.00718	0.0662015	1.08939	No	NA	NA	NA	NA	NA	NA	NA
TR31119|c0_g2_i3	25.4318	51.1172	1.00718	0.0662015	1.0873	No	unnamed protein product	Coffea canephora	NA	heme biosynthetic process[GO:0006783]	ferrochelatase activity[GO:0004325]	NA	map00860:Porphyrin and chlorophyll metabolism(ferro-protoporphyrin chelatase[ec:4.99.1.1])
TR32933|c0_g4_i1	25.4318	51.1172	1.00718	0.0662015	1.086	No	PREDICTED: vacuolar protein-sorting-associated protein 37 homolog 1 isoform X1	Sesamum indicum	NA	NA	NA	NA	NA
TR4019|c1_g2_i1	25.4318	51.1172	1.00718	0.0662015	1.08678	No	PREDICTED: 26S proteasome non-ATPase regulatory subunit 12 homolog A	Populus euphratica	NA	NA	NA	NA	NA
TR41675|c1_g2_i1	25.4318	51.1172	1.00718	0.0662015	1.08756	No	hypothetical protein M569_15961, partial	Genlisea aurea	NA	metabolic process[GO:0008152]	acetylglucosaminyltransferase activity[GO:0008375]	membrane[GO:0016020]	NA
TR43315|c0_g2_i1	25.4318	51.1172	1.00718	0.0662015	1.08912	No	NA	NA	NA	NA	NA	NA	NA
TR43394|c1_g9_i1	25.4318	51.1172	1.00718	0.0662015	1.08626	No	PREDICTED: uncharacterized protein LOC105178397	Sesamum indicum	NA	NA	NA	NA	NA
TR43725|c3_g3_i1	25.4318	51.1172	1.00718	0.0662015	1.08834	No	PREDICTED: ankyrin repeat protein SKIP35-like	Sesamum indicum	NA	NA	NA	NA	NA
TR7833|c0_g3_i3	25.4318	51.1172	1.00718	0.0662015	1.08574	No	NA	NA	NA	NA	NA	NA	NA
TR33051|c0_g1_i5	25.4318	51.1172	1.00718	0.0662015	1.0886	No	PREDICTED: uncharacterized protein LOC105168183	Sesamum indicum	NA	NA	NA	NA	NA
TR36672|c1_g2_i1	25.4318	51.1172	1.00718	0.0662015	1.08886	No	hypothetical protein MIMGU_mgv1a012831mg	Mimulus guttatus	NA	auxin-activated signaling pathway[GO:0009734] ; regulation of transcription, DNA-templated[GO:0006355] ; transcription, DNA-templated[GO:0006351]	NA	nucleus[GO:0005634]	NA
TR37867|c1_g5_i2	25.4318	51.1172	1.00718	0.0662015	1.08808	No	hypothetical protein MIMGU_mgv1a006734mg	Mimulus guttatus	NA	calcium ion transmembrane transport[GO:0070588]	calcium:proton antiporter activity[GO:0015369]	integral component of membrane[GO:0016021]	NA
TR39030|c0_g2_i1	25.4318	51.1172	1.00718	0.0662015	1.08782	No	PREDICTED: two-pore potassium channel 1	Sesamum indicum	NA	NA	NA	NA	NA
TR3965|c0_g1_i3	25.4318	51.1172	1.00718	0.0662015	1.08704	No	NA	NA	NA	NA	NA	NA	NA
TR15591|c0_g1_i1	25.4318	51.1172	1.00718	0.0662015	1.08652	No	hypothetical protein MIMGU_mgv1a007144mg	Mimulus guttatus	NA	NA	NA	NA	NA
TR42739|c1_g1_i1	74.339	149.262	1.00566	0.0185309	0.805435	No	NA	NA	NA	NA	NA	NA	NA
TR40395|c1_g1_i3	74.339	149.262	1.00566	0.0185309	0.805946	No	NA	NA	NA	NA	NA	NA	NA
TR37483|c1_g5_i2	48.9072	98.145	1.00487	0.0332752	0.939582	No	PREDICTED: cyclin-A2-1-like isoform X2	Sesamum indicum	NA	NA	NA	NA	NA
TR38132|c1_g2_i5	48.9072	98.145	1.00487	0.0332752	0.940744	No	PREDICTED: diacylglycerol kinase 3-like	Sesamum indicum	NA	NA	NA	NA	NA
TR38732|c0_g1_i2	48.9072	98.145	1.00487	0.0332752	0.940356	No	hypothetical protein MIMGU_mgv1a000686mg	Mimulus guttatus	NA	NA	DNA binding[GO:0003677]	NA	NA
TR40951|c0_g1_i2	48.9072	98.145	1.00487	0.0332752	0.939969	No	hypothetical protein MIMGU_mgv1a009360mg	Mimulus guttatus	NA	magnesium ion transmembrane transport[GO:1903830] ; magnesium ion transport[GO:0015693]	magnesium ion transmembrane transporter activity[GO:0015095]	integral component of membrane[GO:0016021]	NA
TR51633|c0_g1_i1	48.9072	98.145	1.00487	0.0332752	0.939195	No	PREDICTED: 31 kDa ribonucleoprotein, chloroplastic-like	Setaria italica	NA	NA	NA	NA	NA
TR8213|c1_g1_i3	48.9072	98.145	1.00487	0.0332752	0.938809	No	unnamed protein product	Coffea canephora	NA	NA	NA	NA	NA
TR42649|c2_g10_i7	506.679	1016.21	1.00405	0.00378669	0.439455	No	PREDICTED: uncharacterized protein LOC105168700	Sesamum indicum	NA	NA	NA	NA	NA
TR44651|c0_g4_i1	262.143	525.485	1.0033	0.00465214	0.483449	No	NA	NA	NA	NA	NA	NA	NA
TR33988|c3_g1_i9	142.809	286.256	1.00322	0.00780564	0.609062	No	PREDICTED: probable S-adenosylmethionine-dependent methyltransferase At5g37990	Sesamum indicum	NA	NA	NA	NA	NA
TR31380|c1_g1_i1	93.9019	188.111	1.00236	0.0132955	0.718596	No	PREDICTED: protein RADIALIS-like 4	Sesamum indicum	NA	NA	NA	NA	NA
TR3001|c2_g1_i2	46.9509	94.0556	1.00236	0.0355949	0.955517	No	hypothetical protein L484_014228	Morus notabilis	NA	NA	NA	NA	NA
TR38628|c0_g4_i3	46.9509	94.0556	1.00236	0.0355949	0.95477	No	hypothetical protein MIMGU_mgv1a012713mg	Mimulus guttatus	NA	NA	NA	NA	NA
TR39234|c1_g4_i7	46.9509	94.0556	1.00236	0.0355949	0.955143	No	hypothetical protein M569_13838, partial	Genlisea aurea	NA	protein folding[GO:0006457] ; protein peptidyl-prolyl isomerization[GO:0000413]	peptidyl-prolyl cis-trans isomerase activity[GO:0003755]	NA	NA
TR38302|c0_g2_i1	23.4755	47.0278	1.00236	0.0714426	1.10311	No	PREDICTED: transmembrane protein 64-like	Sesamum indicum	NA	NA	NA	NA	NA
TR39608|c0_g7_i1	23.4755	47.0278	1.00236	0.0714426	1.10361	No	PREDICTED: vesicle-associated protein 2-2-like isoform X2	Nicotiana sylvestris	NA	NA	NA	NA	NA
TR41820|c1_g4_i1	23.4755	47.0278	1.00236	0.0714426	1.10386	No	PREDICTED: uncharacterized protein LOC105169582	Sesamum indicum	NA	NA	NA	NA	NA
TR42922|c0_g2_i2	23.4755	47.0278	1.00236	0.0714426	1.10461	No	hypothetical protein AMTR_s02137p00007130, partial	Amborella trichopoda	NA	regulation of proton transport[GO:0010155] ; detection of light stimulus[GO:0009583] ; response to water deprivation[GO:0009414] ; regulation of meristem growth[GO:0010075] ; circadian regulation of calcium ion oscillation[GO:0010617] ; stomatal movement[GO:0010118] ; regulation of unidimensional cell growth[GO:0051510] ; photomorphogenesis[GO:0009640] ; protein autophosphorylation[GO:0046777] ; …	blue light photoreceptor activity[GO:0009882] ; protein kinase activity[GO:0004672] ; protein homodimerization activity[GO:0042803]	cytosol[GO:0005829]	NA
TR8025|c0_g6_i4	23.4755	47.0278	1.00236	0.0714426	1.10535	No	hypothetical protein MIMGU_mgv1a005920mg	Mimulus guttatus	NA	NA	NA	integral component of membrane[GO:0016021]	NA
TR2517|c0_g1_i8	23.4755	47.0278	1.00236	0.0714426	1.10287	No	PREDICTED: uncharacterized protein LOC105166375	Sesamum indicum	NA	NA	NA	NA	NA
TR33191|c0_g7_i1	23.4755	47.0278	1.00236	0.0714426	1.10485	No	transcription factor MYC2	Salvia miltiorrhiza f. alba	NA	NA	NA	NA	NA
TR34142|c0_g5_i2	23.4755	47.0278	1.00236	0.0714426	1.10436	No	pathogenesis-related protein 10	Salvia miltiorrhiza	NA	response to biotic stimulus[GO:0009607] ; defense response[GO:0006952]	NA	NA	NA
TR40105|c0_g2_i7	23.4755	47.0278	1.00236	0.0714426	1.10336	No	unnamed protein product	Coffea canephora	NA	tryptophan biosynthetic process[GO:0000162]	tryptophan synthase activity[GO:0004834]	NA	map00260:Glycine, serine and threonine metabolism(synthase[ec:4.2.1.20]) ; map01130:Biosynthesis of antibiotics(synthase[ec:4.2.1.20]) ; map00400:Phenylalanine, tyrosine and tryptophan biosynthesis(synthase[ec:4.2.1.20])
TR4044|c2_g1_i5	23.4755	47.0278	1.00236	0.0714426	1.1056	No	PREDICTED: rapid alkalinization factor-like	Erythranthe guttatus	NA	NA	NA	NA	NA
TR41710|c0_g1_i2	23.4755	47.0278	1.00236	0.0714426	1.10411	No	PREDICTED: uncharacterized protein LOC104104407 isoform X2	Nicotiana tomentosiformis	NA	NA	NA	NA	NA
TR44781|c2_g8_i2	23.4755	47.0278	1.00236	0.0714426	1.1051	No	PREDICTED: L-arabinokinase-like	Sesamum indicum	NA	NA	NA	NA	NA
TR42649|c2_g10_i1	911.631	1825.91	1.00209	0.00488082	0.492296	No	PREDICTED: uncharacterized protein LOC105168700	Sesamum indicum	NA	NA	NA	NA	NA
TR28199|c0_g1_i1	162.372	325.105	1.0016	0.0069579	0.576354	No	hypothetical protein MIMGU_mgv11b021692mg	Mimulus guttatus	NA	NA	NA	membrane[GO:0016020]	NA
TR37454|c0_g2_i13	68.4701	136.994	1.00057	0.0216149	0.847629	No	PREDICTED: isopentenyl-diphosphate Delta-isomerase I	Sesamum indicum	NA	NA	NA	NA	NA
TR37263|c3_g1_i1	44.9947	89.9662	0.99963	0.0381394	0.970278	No	hypothetical protein F775_17087	Aegilops tauschii	NA	NA	NA	integral component of membrane[GO:0016021]	NA
TR41287|c1_g8_i1	44.9947	89.9662	0.99963	0.0381394	0.969559	No	PREDICTED: histidinol dehydrogenase, chloroplastic isoform X2	Solanum lycopersicum	NA	histidine biosynthetic process[GO:0000105] ; oxidation-reduction process[GO:0055114]	histidinol dehydrogenase activity[GO:0004399] ; NAD binding[GO:0051287] ; zinc ion binding[GO:0008270]	chloroplast[GO:0009507]	map00340:Histidine metabolism(dehydrogenase[ec:1.1.1.23])
TR33182|c1_g3_i1	44.9947	89.9662	0.99963	0.0381394	0.969199	No	unnamed protein product	Coffea canephora	NA	NA	NA	NA	NA
TR43623|c2_g4_i5	44.9947	89.9662	0.99963	0.0381394	0.969918	No	hypothetical protein MIMGU_mgv1a001110mg	Mimulus guttatus	NA	NA	NA	NA	NA
TR25751|c1_g1_i1	313.006	625.674	0.99922	0.00437548	0.465273	No	PREDICTED: uncharacterized protein LOC105172030	Sesamum indicum	NA	NA	NA	NA	NA
TR39004|c0_g1_i2	156.503	312.837	0.99922	0.0073545	0.593439	No	PREDICTED: bifunctional riboflavin kinase/FMN phosphatase-like isoform X2	Sesamum indicum	NA	NA	NA	NA	NA
TR36313|c1_g1_i2	749.259	1496.71	0.99826	0.00447404	0.472094	No	PREDICTED: IAA-amino acid hydrolase ILR1-like 4	Sesamum indicum	NA	NA	NA	NA	NA
TR40716|c0_g7_i4	109.552	218.782	0.997873	0.0110477	0.677752	No	PREDICTED: probable polygalacturonase	Sesamum indicum	NA	NA	NA	NA	NA
TR38336|c0_g1_i1	195.629	390.535	0.997333	0.00610462	0.539559	No	hypothetical protein MIMGU_mgv1a027064mg	Mimulus guttatus	NA	metabolic process[GO:0008152]	transferase activity, transferring acyl groups other than amino-acyl groups[GO:0016747]	NA	NA
TR43326|c0_g5_i4	215.192	429.384	0.996646	0.00568136	0.528722	No	hypothetical protein CISIN_1g0059551mg, partial	Citrus sinensis	NA	NA	ATP binding[GO:0005524]	NA	NA
TR44739|c1_g2_i3	86.0767	171.754	0.996646	0.0158155	0.77371	No	PREDICTED: uncharacterized protein LOC105179348 isoform X3	Sesamum indicum	NA	NA	NA	NA	NA
TR3131|c0_g1_i2	86.0767	171.754	0.996646	0.0158155	0.773158	No	NA	NA	NA	NA	NA	NA	NA
TR27557|c0_g1_i2	64.5575	128.815	0.996646	0.0240398	0.857419	No	hypothetical protein MIMGU_mgv1a009574mg	Mimulus guttatus	NA	NA	NA	NA	NA
TR22975|c0_g1_i1	43.0384	85.8769	0.996646	0.0409293	0.993354	No	PREDICTED: heat shock 70 kDa protein 17	Sesamum indicum	NA	NA	NA	NA	NA
TR26021|c0_g1_i1	21.5192	42.9384	0.996646	0.0763455	1.11292	No	PREDICTED: mediator of RNA polymerase II transcription subunit 12 isoform X2	Sesamum indicum	NA	NA	NA	NA	NA
TR35195|c0_g1_i3	21.5192	42.9384	0.996646	0.0763455	1.11387	No	hypothetical protein MIMGU_mgv1a010760mg	Mimulus guttatus	NA	NA	NA	NA	NA
TR38308|c1_g4_i7	21.5192	42.9384	0.996646	0.0763455	1.11411	No	hypothetical protein MIMGU_mgv1a010837mg	Mimulus guttatus	NA	NA	NA	NA	NA
TR42641|c0_g13_i1	21.5192	42.9384	0.996646	0.0763455	1.11174	No	At1G15690-like protein	Arabidopsis lyrata subsp. lyrata	NA	metabolic process[GO:0008152] ; proton transport[GO:0015992] ; transmembrane transport[GO:0055085]	inorganic diphosphatase activity[GO:0004427] ; hydrogen-translocating pyrophosphatase activity[GO:0009678]	integral component of membrane[GO:0016021]	map00190:Oxidative phosphorylation(diphosphatase[ec:3.6.1.1])
TR43800|c2_g8_i2	21.5192	42.9384	0.996646	0.0763455	1.1134	No	unknown	Zea mays	NA	metabolic process[GO:0008152]	transferase activity, transferring acyl groups[GO:0016746]	NA	NA
TR2212|c1_g1_i3	21.5192	42.9384	0.996646	0.0763455	1.11434	No	PREDICTED: uncharacterized protein LOC105133699 isoform X2	Populus euphratica	NA	NA	NA	NA	NA
TR29636|c0_g1_i2	21.5192	42.9384	0.996646	0.0763455	1.11363	No	PREDICTED: tubulin-folding cofactor E	Sesamum indicum	NA	NA	NA	NA	NA
TR30985|c0_g1_i3	21.5192	42.9384	0.996646	0.0763455	1.11269	No	PREDICTED: sulfiredoxin, chloroplastic/mitochondrial isoform X2	Sesamum indicum	NA	NA	NA	NA	NA
TR34270|c2_g2_i5	21.5192	42.9384	0.996646	0.0763455	1.1108	No	PREDICTED: uncharacterized protein LOC105177790	Sesamum indicum	NA	NA	NA	NA	NA
TR35739|c0_g2_i1	21.5192	42.9384	0.996646	0.0763455	1.11245	No	hypothetical protein MIMGU_mgv1a010363mg	Mimulus guttatus	NA	carbohydrate metabolic process[GO:0005975]	carbohydrate binding[GO:0030246] ; isomerase activity[GO:0016853]	NA	NA
TR39040|c0_g3_i1	21.5192	42.9384	0.996646	0.0763455	1.11103	No	PREDICTED: 3beta-hydroxysteroid-dehydrogenase/decarboxylase isoform 2 isoform X2	Sesamum indicum	NA	NA	NA	NA	NA
TR42527|c0_g3_i1	21.5192	42.9384	0.996646	0.0763455	1.11127	No	hypothetical protein MIMGU_mgv1a000652mg	Mimulus guttatus	NA	metabolic process[GO:0008152]	glycogen (starch) synthase activity[GO:0004373]	NA	map00500:Starch and sucrose metabolism(synthase[ec:2.4.1.11])
TR43771|c1_g1_i1	21.5192	42.9384	0.996646	0.0763455	1.11151	No	PREDICTED: probable leucine-rich repeat receptor-like serine/threonine-protein kinase At3g14840	Sesamum indicum	NA	NA	NA	NA	NA
TR43888|c0_g2_i6	21.5192	42.9384	0.996646	0.0763455	1.11316	No	PREDICTED: homeobox-leucine zipper protein ANTHOCYANINLESS 2-like isoform X1	Cicer arietinum	NA	NA	NA	NA	NA
TR8214|c1_g7_i1	21.5192	42.9384	0.996646	0.0763455	1.11198	No	PREDICTED: protein transport protein SEC23-like	Sesamum indicum	NA	NA	NA	NA	NA
TR39763|c1_g1_i8	21.5192	42.9384	0.996646	0.0763455	1.11221	No	NA	NA	NA	NA	NA	NA	NA
TR41229|c1_g1_i5	275.837	550.021	0.995672	0.00482725	0.492689	No	PREDICTED: protein transport protein SEC31 homolog B	Sesamum indicum	NA	NA	NA	NA	NA
TR40720|c0_g5_i2	84.1204	167.664	0.995048	0.0165646	0.780301	No	PREDICTED: transcription factor TCP5-like	Sesamum indicum	NA	NA	NA	NA	NA
TR34227|c0_g1_i1	125.203	249.452	0.994498	0.00965848	0.649457	No	PREDICTED: solute carrier family 40 member 3, chloroplastic-like	Sesamum indicum	NA	NA	NA	NA	NA
TR36275|c3_g2_i1	62.6013	124.726	0.994498	0.0254034	0.8677	No	PREDICTED: uncharacterized protein LOC105156632	Sesamum indicum	NA	NA	NA	NA	NA
TR43406|c1_g1_i3	604.493	1204.32	0.994421	0.00424744	0.462411	No	PREDICTED: AMP deaminase-like isoform X1	Sesamum indicum	NA	NA	NA	NA	NA
TR30927|c2_g1_i4	350.176	697.238	0.993573	0.004397	0.466838	No	hypothetical protein GLYMA_09G247900	Glycine max	NA	NA	NA	NA	NA
TR2558|c2_g3_i2	82.1641	163.575	0.993371	0.0173685	0.788911	No	NA	NA	NA	NA	NA	NA	NA
TR7678|c2_g1_i1	82.1641	163.575	0.993371	0.0173685	0.789434	No	PREDICTED: probable RNA-binding protein EIF1AD	Sesamum indicum	NA	NA	NA	NA	NA
TR27965|c0_g1_i2	41.0821	81.7875	0.993371	0.0439858	0.999621	No	PREDICTED: chaperone protein ClpD, chloroplastic	Sesamum indicum	NA	NA	NA	NA	NA
TR36238|c1_g3_i6	41.0821	81.7875	0.993371	0.0439858	0.998628	No	hypothetical protein MIMGU_mgv1a010567mg	Mimulus guttatus	NA	protein transport[GO:0015031]	NA	integral component of membrane[GO:0016021]	NA
TR39164|c0_g1_i8	41.0821	81.7875	0.993371	0.0439858	0.99929	No	PREDICTED: serine/threonine-protein kinase HT1	Sesamum indicum	NA	NA	NA	NA	NA
TR43769|c3_g8_i1	41.0821	81.7875	0.993371	0.0439858	0.998959	No	NA	NA	NA	NA	NA	NA	NA
TR43623|c1_g1_i2	41.0821	81.7875	0.993371	0.0439858	0.999952	No	PREDICTED: putative late blight resistance protein homolog R1B-16	Sesamum indicum	NA	NA	NA	NA	NA
TR40319|c1_g1_i1	1635.46	3255.14	0.993026	0.00896842	0.625755	No	PREDICTED: alkaline/neutral invertase CINV2	Sesamum indicum	NA	NA	NA	NA	NA
TR39307|c0_g2_i2	60.645	120.637	0.992207	0.0268996	0.889566	No	hypothetical protein MIMGU_mgv1a001554mg	Mimulus guttatus	NA	NA	NA	integral component of membrane[GO:0016021]	NA
TR42502|c1_g3_i4	273.88	543.887	0.98976	0.00510873	0.502715	No	hypothetical protein MIMGU_mgv1a000979mg	Mimulus guttatus	NA	oxylipin biosynthetic process[GO:0031408] ; oxidation-reduction process[GO:0055114]	metal ion binding[GO:0046872] ; oxidoreductase activity, acting on single donors with incorporation of molecular oxygen, incorporation of two atoms of oxygen[GO:0016702]	NA	NA
TR36702|c0_g3_i3	78.2516	155.396	0.98976	0.0191574	0.821217	No	hypothetical protein BVRB_1g009970	Beta vulgaris subsp. vulgaris	NA	NA	NA	NA	NA
TR44447|c2_g5_i1	58.6887	116.547	0.98976	0.0285425	0.913933	No	PREDICTED: calmodulin-binding transcription activator 1	Sesamum indicum	NA	NA	NA	NA	NA
TR1691|c0_g1_i1	19.5629	38.8491	0.98976	0.0802205	1.12333	No	hypothetical protein CISIN_1g008730mg	Citrus sinensis	NA	protein dephosphorylation[GO:0006470]	phosphoprotein phosphatase activity[GO:0004721]	cytoplasm[GO:0005737] ; nucleus[GO:0005634]	map04660:T cell receptor signaling pathway(phosphatase[ec:3.1.3.16])
TR32895|c0_g2_i8	19.5629	38.8491	0.98976	0.0802205	1.12356	No	PREDICTED: uncharacterized protein LOC105178847 isoform X2	Sesamum indicum	NA	NA	NA	NA	NA
TR40545|c0_g5_i2	19.5629	38.8491	0.98976	0.0802205	1.12494	No	PREDICTED: protein trichome birefringence-like 34	Erythranthe guttatus	NA	NA	NA	NA	NA
TR41409|c1_g1_i1	19.5629	38.8491	0.98976	0.0802205	1.12219	No	somatic embryogenesis-like kinase, partial	Garcinia mangostana	NA	protein phosphorylation[GO:0006468]	ATP binding[GO:0005524] ; protein serine/threonine kinase activity[GO:0004674]	NA	NA
TR41621|c1_g4_i1	19.5629	38.8491	0.98976	0.0802205	1.12242	No	unnamed protein product	Coffea canephora	NA	protein folding[GO:0006457] ; response to heat[GO:0009408]	metal ion binding[GO:0046872] ; ATP binding[GO:0005524] ; unfolded protein binding[GO:0051082] ; heat shock protein binding[GO:0031072]	NA	NA
TR42217|c0_g6_i1	19.5629	38.8491	0.98976	0.0802205	1.1231	No	PREDICTED: probable galacturonosyltransferase 4	Sesamum indicum	NA	NA	NA	NA	NA
TR42293|c1_g1_i1	19.5629	38.8491	0.98976	0.0802205	1.12379	No	PREDICTED: 1,4-alpha-glucan-branching enzyme 2-2, chloroplastic/amyloplastic isoform X2	Sesamum indicum	NA	NA	NA	NA	NA
TR42369|c0_g3_i1	19.5629	38.8491	0.98976	0.0802205	1.12402	No	NA	NA	NA	NA	NA	NA	NA
TR42612|c2_g2_i3	19.5629	38.8491	0.98976	0.0802205	1.12425	No	hypothetical protein JCGZ_10741	Jatropha curcas	NA	protein phosphorylation[GO:0006468]	protein kinase activity[GO:0004672] ; calcium ion binding[GO:0005509] ; ATP binding[GO:0005524]	NA	NA
TR42841|c0_g2_i3	19.5629	38.8491	0.98976	0.0802205	1.12471	No	PREDICTED: LOW QUALITY PROTEIN: probable acyl-activating enzyme 16, chloroplastic	Sesamum indicum	NA	NA	NA	NA	NA
TR43182|c0_g1_i1	19.5629	38.8491	0.98976	0.0802205	1.12517	No	PREDICTED: synaptotagmin-3	Sesamum indicum	NA	NA	NA	NA	NA
TR26069|c0_g1_i9	19.5629	38.8491	0.98976	0.0802205	1.1254	No	NA	NA	NA	NA	NA	NA	NA
TR2713|c2_g1_i2	19.5629	38.8491	0.98976	0.0802205	1.12287	No	PREDICTED: LOW QUALITY PROTEIN: probable splicing factor 3A subunit 1	Populus euphratica	NA	NA	NA	NA	NA
TR30934|c5_g2_i1	19.5629	38.8491	0.98976	0.0802205	1.12264	No	PREDICTED: LRR receptor-like serine/threonine-protein kinase EFR isoform X1	Sesamum indicum	NA	NA	NA	NA	NA
TR31145|c0_g1_i2	19.5629	38.8491	0.98976	0.0802205	1.12196	No	PREDICTED: receptor-like protein kinase FERONIA	Erythranthe guttatus	NA	NA	NA	NA	NA
TR35171|c0_g1_i2	19.5629	38.8491	0.98976	0.0802205	1.12448	No	PREDICTED: uncharacterized protein LOC105168288	Sesamum indicum	NA	NA	NA	NA	NA
TR37445|c0_g2_i1	19.5629	38.8491	0.98976	0.0802205	1.12127	No	PREDICTED: pre-mRNA-processing factor 17	Sesamum indicum	NA	NA	NA	NA	NA
TR39956|c2_g4_i8	19.5629	38.8491	0.98976	0.0802205	1.12013	No	PREDICTED: dihydroorotase, mitochondrial	Sesamum indicum	NA	NA	NA	NA	NA
TR4093|c1_g11_i4	19.5629	38.8491	0.98976	0.0802205	1.12104	No	NA	NA	NA	NA	NA	NA	NA
TR43187|c2_g3_i1	19.5629	38.8491	0.98976	0.0802205	1.12082	No	PREDICTED: oligopeptide transporter 5-like	Sesamum indicum	NA	NA	NA	NA	NA
TR44813|c4_g10_i1	19.5629	38.8491	0.98976	0.0802205	1.12059	No	PREDICTED: serine/threonine-protein kinase BRI1-like 2	Erythranthe guttatus	NA	NA	NA	NA	NA
TR33675|c0_g1_i2	19.5629	38.8491	0.98976	0.0802205	1.12173	No	PREDICTED: ribulose-phosphate 3-epimerase, cytoplasmic isoform isoform X2	Sesamum indicum	NA	NA	NA	NA	NA
TR39376|c0_g3_i2	19.5629	38.8491	0.98976	0.0802205	1.12036	No	NA	NA	NA	NA	NA	NA	NA
TR41304|c1_g1_i5	19.5629	38.8491	0.98976	0.0802205	1.1215	No	tryptophan synthase beta chain, putative	Ricinus communis	NA	tryptophan biosynthetic process[GO:0000162]	tryptophan synthase activity[GO:0004834] ; pyridoxal phosphate binding[GO:0030170]	NA	map00260:Glycine, serine and threonine metabolism(synthase[ec:4.2.1.20]) ; map01130:Biosynthesis of antibiotics(synthase[ec:4.2.1.20]) ; map00400:Phenylalanine, tyrosine and tryptophan biosynthesis(synthase[ec:4.2.1.20])
TR40134|c0_g4_i4	134.984	267.854	0.988659	0.0093192	0.634733	No	PREDICTED: protein NRT1/ PTR FAMILY 5.6-like	Sesamum indicum	NA	NA	NA	NA	NA
TR33708|c0_g1_i1	905.762	1797.28	0.988612	0.00542837	0.520721	No	omega-3 fatty acid desaturase	Perilla frutescens	Lamiaceae	oxidation-reduction process[GO:0055114] ; lipid metabolic process[GO:0006629]	oxidoreductase activity, acting on paired donors, with oxidation of a pair of donors resulting in the reduction of molecular oxygen to two molecules of water[GO:0016717]	integral component of membrane[GO:0016021]	NA
TR35347|c1_g2_i4	115.421	229.005	0.988472	0.0111231	0.678736	No	NA	NA	NA	NA	NA	NA	NA
TR35020|c0_g3_i4	76.2953	151.307	0.987812	0.0201511	0.824646	No	PREDICTED: peptidyl-prolyl cis-trans isomerase FKBP18, chloroplastic	Sesamum indicum	NA	NA	NA	NA	NA
TR24879|c0_g1_i1	56.7324	112.458	0.987139	0.030348	0.935497	No	putative transposase	Ipomoea tricolor	NA	NA	NA	NA	NA
TR26851|c0_g1_i4	93.9019	186.067	0.986593	0.0149446	0.758702	No	NA	NA	NA	NA	NA	NA	NA
TR33246|c2_g3_i1	74.339	147.217	0.985758	0.0212175	0.841181	No	PREDICTED: cytochrome P450 71A8-like	Sesamum indicum	NA	NA	NA	NA	NA
TR33147|c0_g7_i1	37.1695	73.6087	0.985758	0.050984	1.05295	No	hypothetical protein B456_011G250100	Gossypium raimondii	NA	vesicle-mediated transport[GO:0016192] ; intracellular protein transport[GO:0006886]	NA	intracellular[GO:0005622]	NA
TR23094|c0_g1_i2	37.1695	73.6087	0.985758	0.050984	1.05327	No	PREDICTED: phosphoenolpyruvate carboxylase 1-like	Sesamum indicum	NA	NA	NA	NA	NA
TR26333|c0_g1_i1	37.1695	73.6087	0.985758	0.050984	1.05231	No	PREDICTED: putative gamma-glutamylcyclotransferase At3g02910	Sesamum indicum	NA	NA	NA	NA	NA
TR26930|c0_g1_i1	37.1695	73.6087	0.985758	0.050984	1.0539	No	hypothetical protein MIMGU_mgv1a016614mg	Mimulus guttatus	NA	NA	NA	NA	NA
TR34975|c0_g1_i4	37.1695	73.6087	0.985758	0.050984	1.05358	No	cytochrome P450 CYP727B10	Salvia miltiorrhiza	NA	oxidation-reduction process[GO:0055114]	heme binding[GO:0020037] ; oxidoreductase activity, acting on paired donors, with incorporation or reduction of molecular oxygen[GO:0016705] ; monooxygenase activity[GO:0004497] ; iron ion binding[GO:0005506]	integral component of membrane[GO:0016021]	NA
TR38172|c2_g4_i4	37.1695	73.6087	0.985758	0.050984	1.05263	No	glucosyltransferase	Sinningia cardinalis	NA	NA	transferase activity, transferring glycosyl groups[GO:0016757]	NA	NA
TR4029|c0_g1_i2	275.837	545.932	0.984905	0.00531078	0.512307	No	PREDICTED: uncharacterized protein LOC105158187	Sesamum indicum	NA	NA	NA	NA	NA
TR33095|c0_g1_i1	1680.45	3324.66	0.984358	0.00982142	0.652103	No	PREDICTED: carbonic anhydrase, chloroplastic-like isoform X2	Sesamum indicum	NA	NA	NA	NA	NA
TR39554|c0_g5_i1	54.7761	108.368	0.984326	0.0323337	0.934937	No	hypothetical protein MIMGU_mgv1a010963mg	Mimulus guttatus	NA	transport[GO:0006810]	NA	intracellular[GO:0005622]	NA
TR35365|c1_g2_i3	54.7761	108.368	0.984326	0.0323337	0.934543	No	Tam3-transposase	Antirrhinum majus	NA	NA	NA	NA	NA
TR39035|c0_g1_i2	1815.44	3590.47	0.983857	0.0107568	0.675001	No	hypothetical protein MIMGU_mgv1a005412mg	Mimulus guttatus	NA	proteolysis[GO:0006508]	peptidase activity[GO:0008233]	NA	NA
TR41319|c1_g1_i5	199.542	394.625	0.983792	0.00674238	0.563264	No	NA	NA	NA	NA	NA	NA	NA
TR41104|c2_g1_i2	72.3827	143.128	0.98359	0.0223614	0.855384	No	tyrosine aminotransferase	Solenostemon scutellarioides	NA	cellular amino acid metabolic process[GO:0006520] ; biosynthetic process[GO:0009058]	pyridoxal phosphate binding[GO:0030170] ; L-tyrosine:2-oxoglutarate aminotransferase activity[GO:0004838] ; L-phenylalanine:2-oxoglutarate aminotransferase activity[GO:0080130]	NA	map00130:Ubiquinone and other terpenoid-quinone biosynthesis(transaminase[ec:2.6.1.5]) ; map00350:Tyrosine metabolism(transaminase[ec:2.6.1.57]) ; map00350:Tyrosine metabolism(transaminase[ec:2.6.1.9]) ; map00350:Tyrosine metabolism(transaminase[ec:2.6.1.5]) ; map00350:Tyrosine metabolism(transaminase[ec:2.6.1.1]) ; map00220:Arginine biosynthesis(transaminase[ec:2.6.1.1]) ; map00950:Isoquinoline …
TR41137|c0_g1_i2	72.3827	143.128	0.98359	0.0223614	0.855861	No	PREDICTED: phosphate transporter PHO1 homolog 1-like	Sesamum indicum	NA	NA	NA	NA	NA
TR31787|c1_g2_i5	72.3827	143.128	0.98359	0.0223614	0.854907	No	NA	NA	NA	NA	NA	NA	NA
TR40563|c2_g6_i6	178.022	351.686	0.982231	0.00752138	0.601246	No	NA	NA	NA	NA	NA	NA	NA
TR34779|c0_g2_i4	852.942	1684.82	0.982077	0.00551178	0.522872	No	PREDICTED: 50S ribosomal protein L6, chloroplastic	Sesamum indicum	NA	NA	NA	NA	NA
TR40105|c0_g3_i1	334.525	660.434	0.981298	0.00499142	0.499047	No	PREDICTED: tryptophan synthase beta chain 1	Erythranthe guttatus	NA	NA	NA	NA	NA
TR41683|c1_g1_i1	105.64	208.558	0.981298	0.0131658	0.718377	No	4-coumarate: CoA ligase	Scutellaria baicalensis	Lamiaceae	metabolic process[GO:0008152]	ligase activity[GO:0016874]	NA	NA
TR39004|c0_g1_i1	105.64	208.558	0.981298	0.0131658	0.718949	No	PREDICTED: bifunctional riboflavin kinase/FMN phosphatase-like	Erythranthe guttatus	NA	NA	NA	NA	NA
TR39007|c0_g3_i2	70.4264	139.039	0.981298	0.0235883	0.859186	No	hypothetical protein MIMGU_mgv1a006086mg	Mimulus guttatus	NA	metal ion transport[GO:0030001] ; transmembrane transport[GO:0055085]	metal ion transmembrane transporter activity[GO:0046873]	integral component of membrane[GO:0016021]	NA
TR30997|c0_g5_i1	35.2132	69.5194	0.981298	0.0549998	1.06231	No	PREDICTED: probable WRKY transcription factor 40	Sesamum indicum	NA	NA	NA	NA	NA
TR35348|c0_g8_i3	35.2132	69.5194	0.981298	0.0549998	1.06201	No	PREDICTED: CDK-activating kinase assembly factor MAT1 isoform X1	Sesamum indicum	NA	NA	NA	NA	NA
TR42534|c0_g1_i2	35.2132	69.5194	0.981298	0.0549998	1.06261	No	PREDICTED: beta-galactosidase 9	Erythranthe guttatus	NA	NA	NA	NA	NA
TR43650|c0_g4_i2	35.2132	69.5194	0.981298	0.0549998	1.06321	No	PREDICTED: uncharacterized protein LOC105165093	Sesamum indicum	NA	NA	NA	NA	NA
TR44777|c0_g2_i1	35.2132	69.5194	0.981298	0.0549998	1.06291	No	PREDICTED: uncharacterized protein LOC105157864 isoform X1	Sesamum indicum	NA	NA	NA	NA	NA
TR32640|c0_g1_i1	17.6066	34.7597	0.981298	0.0828108	1.12693	No	PREDICTED: CASP-like protein 4A3	Sesamum indicum	NA	NA	NA	NA	NA
TR33387|c1_g4_i1	17.6066	34.7597	0.981298	0.0828108	1.12738	No	PREDICTED: uncharacterized protein LOC105166619	Sesamum indicum	NA	NA	NA	NA	NA
TR34523|c0_g1_i9	17.6066	34.7597	0.981298	0.0828108	1.12783	No	basic helix-loop-helix transcription factor	Salvia miltiorrhiza	NA	NA	protein dimerization activity[GO:0046983]	NA	NA
TR36024|c0_g4_i1	17.6066	34.7597	0.981298	0.0828108	1.12337	No	NA	NA	NA	NA	NA	NA	NA
TR36778|c0_g3_i4	17.6066	34.7597	0.981298	0.0828108	1.12828	No	hypothetical protein B456_005G056700	Gossypium raimondii	NA	NA	NA	NA	NA
TR36926|c1_g5_i1	17.6066	34.7597	0.981298	0.0828108	1.1276	No	hypothetical protein CISIN_1g014743mg	Citrus sinensis	NA	protein catabolic process[GO:0030163]	hydrolase activity[GO:0016787] ; ATP binding[GO:0005524]	cytoplasm[GO:0005737]	NA
TR39136|c0_g4_i1	17.6066	34.7597	0.981298	0.0828108	1.12649	No	PREDICTED: RPM1-interacting protein 4-like, partial	Sesamum indicum	NA	NA	NA	NA	NA
TR39542|c0_g10_i3	17.6066	34.7597	0.981298	0.0828108	1.12515	No	PREDICTED: uncharacterized protein LOC105164936	Sesamum indicum	NA	NA	NA	NA	NA
TR43213|c0_g2_i1	17.6066	34.7597	0.981298	0.0828108	1.12492	No	NA	NA	NA	NA	NA	NA	NA
TR30667|c3_g1_i3	17.6066	34.7597	0.981298	0.0828108	1.12359	No	NA	NA	NA	NA	NA	NA	NA
TR3091|c0_g2_i1	17.6066	34.7597	0.981298	0.0828108	1.12716	No	PREDICTED: 10 kDa chaperonin-like	Sesamum indicum	NA	NA	NA	NA	NA
TR34137|c1_g1_i2	17.6066	34.7597	0.981298	0.0828108	1.1285	No	hypothetical protein MIMGU_mgv1a012858mg	Mimulus guttatus	NA	NA	NA	NA	NA
TR34817|c0_g4_i3	17.6066	34.7597	0.981298	0.0828108	1.12403	No	PREDICTED: protein FATTY ACID EXPORT 2, chloroplastic-like	Erythranthe guttatus	NA	NA	NA	NA	NA
TR35974|c0_g2_i1	17.6066	34.7597	0.981298	0.0828108	1.12381	No	hypothetical protein MIMGU_mgv1a003829mg	Mimulus guttatus	NA	NA	NA	NA	NA
TR36150|c1_g2_i3	17.6066	34.7597	0.981298	0.0828108	1.12426	No	PREDICTED: uncharacterized protein LOC105167549	Sesamum indicum	NA	NA	NA	NA	NA
TR38916|c0_g2_i4	17.6066	34.7597	0.981298	0.0828108	1.12448	No	PREDICTED: dolichyl-phosphate beta-glucosyltransferase	Nicotiana sylvestris	NA	NA	NA	NA	NA
TR39895|c0_g7_i2	17.6066	34.7597	0.981298	0.0828108	1.12582	No	PREDICTED: uncharacterized oxidoreductase At1g06690, chloroplastic-like	Solanum tuberosum	NA	oxidation-reduction process[GO:0055114]	oxidoreductase activity[GO:0016491]	chloroplast envelope[GO:0009941] ; chloroplast thylakoid membrane[GO:0009535]	NA
TR40103|c0_g6_i1	17.6066	34.7597	0.981298	0.0828108	1.1247	No	NA	NA	NA	NA	NA	NA	NA
TR40754|c0_g2_i1	17.6066	34.7597	0.981298	0.0828108	1.12537	No	hypothetical protein MIMGU_mgv1a005683mg	Mimulus guttatus	NA	metabolic process[GO:0008152]	catalytic activity[GO:0003824]	NA	NA
TR42277|c1_g4_i5	17.6066	34.7597	0.981298	0.0828108	1.12559	No	PREDICTED: xylulose kinase-like isoform X2	Sesamum indicum	NA	NA	NA	NA	NA
TR43260|c1_g3_i1	17.6066	34.7597	0.981298	0.0828108	1.12805	No	PREDICTED: protein NRT1/ PTR FAMILY 2.11-like	Nicotiana tomentosiformis	NA	NA	NA	NA	NA
TR43305|c0_g1_i1	17.6066	34.7597	0.981298	0.0828108	1.12671	No	hypothetical protein MIMGU_mgv1a001035mg	Mimulus guttatus	NA	oxylipin biosynthetic process[GO:0031408] ; oxidation-reduction process[GO:0055114]	metal ion binding[GO:0046872] ; oxidoreductase activity, acting on single donors with incorporation of molecular oxygen, incorporation of two atoms of oxygen[GO:0016702]	NA	NA
TR44279|c0_g2_i1	17.6066	34.7597	0.981298	0.0828108	1.12626	No	PREDICTED: AP-4 complex subunit epsilon	Sesamum indicum	NA	NA	NA	NA	NA
TR29648|c0_g2_i3	17.6066	34.7597	0.981298	0.0828108	1.12604	No	PREDICTED: protein RADIALIS-like 3	Sesamum indicum	NA	NA	NA	NA	NA
TR3630|c0_g1_i1	86.0767	169.709	0.979368	0.0178962	0.793951	No	PREDICTED: peroxisomal membrane protein 11B	Sesamum indicum	NA	NA	NA	NA	NA
TR32322|c0_g1_i3	86.0767	169.709	0.979368	0.0178962	0.793438	No	hypothetical protein MIMGU_mgv1a016030mg	Mimulus guttatus	NA	NA	NA	NA	NA
TR44215|c1_g8_i4	68.4701	134.949	0.978872	0.0249034	0.86396	No	PREDICTED: probable galactinol--sucrose galactosyltransferase 2	Sesamum indicum	NA	NA	NA	NA	NA
TR44737|c2_g2_i4	68.4701	134.949	0.978872	0.0249034	0.864397	No	hypothetical protein MIMGU_mgv1a000292mg	Mimulus guttatus	NA	NA	NA	integral component of membrane[GO:0016021]	NA
TR42649|c2_g7_i4	358.001	705.417	0.978513	0.00499292	0.498471	No	PREDICTED: uncharacterized protein LOC105168700	Sesamum indicum	NA	NA	NA	NA	NA
TR40433|c1_g1_i5	101.727	200.379	0.978031	0.0142064	0.740971	No	PREDICTED: protein NRT1/ PTR FAMILY 5.10-like	Sesamum indicum	NA	NA	NA	NA	NA
TR32080|c3_g1_i2	50.8635	100.19	0.978031	0.0369258	0.96813	No	MYB5	Scutellaria baicalensis	Lamiaceae	regulation of transcription, DNA-templated[GO:0006355] ; transcription, DNA-templated[GO:0006351]	DNA binding[GO:0003677]	nucleus[GO:0005634]	NA
TR30906|c1_g2_i14	50.8635	100.19	0.978031	0.0369258	0.96776	No	hypothetical protein MIMGU_mgv1a014245mg	Mimulus guttatus	NA	NA	NA	NA	NA
TR28208|c0_g1_i1	168.241	331.239	0.977346	0.00823493	0.614591	No	PREDICTED: apoptosis-enhancing nuclease	Sesamum indicum	NA	NA	NA	NA	NA
TR44804|c0_g2_i3	117.377	231.05	0.977049	0.0119093	0.696948	No	NA	NA	NA	NA	NA	NA	NA
TR37650|c2_g1_i13	66.5138	130.86	0.976298	0.0263124	0.880764	No	PREDICTED: protein ROOT HAIR DEFECTIVE 3 homolog 2-like	Malus domestica	NA	NA	NA	NA	NA
TR33093|c0_g3_i3	33.2569	65.43	0.976298	0.0596402	1.06636	No	PREDICTED: uncharacterized protein DDB_G0287625-like, partial	Nicotiana tomentosiformis	NA	NA	NA	NA	NA
TR34259|c2_g2_i2	33.2569	65.43	0.976298	0.0596402	1.06608	No	PREDICTED: protein-ribulosamine 3-kinase, chloroplastic	Sesamum indicum	NA	NA	NA	NA	NA
TR40416|c0_g9_i1	33.2569	65.43	0.976298	0.0596402	1.06747	No	PREDICTED: LEC14B protein	Sesamum indicum	NA	NA	NA	NA	NA
TR42036|c0_g2_i1	33.2569	65.43	0.976298	0.0596402	1.06719	No	PREDICTED: LOW QUALITY PROTEIN: uncharacterized protein LOC105164705	Sesamum indicum	NA	NA	NA	NA	NA
TR35929|c0_g3_i1	33.2569	65.43	0.976298	0.0596402	1.06691	No	PREDICTED: probable S-adenosylmethionine carrier 2, chloroplastic	Erythranthe guttatus	NA	NA	NA	NA	NA
TR40415|c0_g4_i3	33.2569	65.43	0.976298	0.0596402	1.06663	No	hypothetical protein MIMGU_mgv1a009442mg	Mimulus guttatus	NA	NA	NA	NA	NA
TR40234|c2_g2_i4	82.1641	161.53	0.975224	0.0197224	0.832945	No	PREDICTED: uncharacterized protein LOC105175605 isoform X1	Sesamum indicum	NA	NA	NA	NA	NA
TR44170|c1_g6_i1	82.1641	161.53	0.975224	0.0197224	0.833458	No	PREDICTED: proteasome-associated protein ECM29 homolog	Sesamum indicum	NA	NA	NA	NA	NA
TR33275|c0_g1_i1	179.979	353.731	0.974827	0.00792467	0.610707	No	PREDICTED: uncharacterized protein LOC105171045 isoform X2	Sesamum indicum	NA	NA	NA	NA	NA
TR28616|c0_g1_i5	635.794	1249.3	0.974493	0.00512279	0.499797	No	PREDICTED: heat shock cognate protein 80-like	Sesamum indicum	NA	NA	NA	NA	NA
TR35066|c0_g1_i3	48.9072	96.1003	0.974493	0.0395779	0.977505	No	PREDICTED: uncharacterized protein LOC105161815	Sesamum indicum	NA	NA	NA	NA	NA
TR37303|c0_g1_i4	48.9072	96.1003	0.974493	0.0395779	0.976802	No	NA	NA	NA	NA	NA	NA	NA
TR8277|c0_g2_i5	48.9072	96.1003	0.974493	0.0395779	0.977153	No	PREDICTED: uncharacterized protein LOC105177245	Sesamum indicum	NA	NA	NA	NA	NA
TR37723|c0_g1_i3	64.5575	126.771	0.973563	0.0278284	0.900315	No	NA	NA	NA	NA	NA	NA	NA
TR32192|c3_g5_i1	369.739	725.864	0.973193	0.0051821	0.503434	No	hypothetical protein MIMGU_mgv1a006198mg	Mimulus guttatus	NA	pectin catabolic process[GO:0045490]	metal ion binding[GO:0046872] ; pectate lyase activity[GO:0030570]	NA	map00040:Pentose and glucuronate interconversions(lyase[ec:4.2.2.2])
TR30402|c0_g1_i5	238.667	468.233	0.972227	0.00650211	0.552615	No	PREDICTED: uncharacterized protein LOC104216614	Nicotiana sylvestris	NA	NA	NA	NA	NA
TR38038|c0_g2_i1	93.9019	184.022	0.970651	0.0167897	0.783902	No	PREDICTED: uncharacterized protein LOC105163785	Sesamum indicum	NA	NA	NA	NA	NA
TR31737|c1_g2_i1	78.2516	153.352	0.970651	0.0218329	0.85228	No	Aquaporin PIP2-1	Aegilops tauschii	NA	transport[GO:0006810]	transporter activity[GO:0005215]	integral component of membrane[GO:0016021]	NA
TR30782|c1_g1_i2	78.2516	153.352	0.970651	0.0218329	0.851795	No	PREDICTED: LRR receptor-like serine/threonine-protein kinase GSO2 isoform X2	Sesamum indicum	NA	NA	NA	NA	NA
TR30923|c0_g3_i1	46.9509	92.0109	0.970651	0.0425021	0.993894	No	PREDICTED: clustered mitochondria protein-like, partial	Erythranthe guttatus	NA	NA	NA	NA	NA
TR38356|c0_g1_i2	46.9509	92.0109	0.970651	0.0425021	0.994233	No	PREDICTED: uncharacterized protein LOC105160330	Sesamum indicum	NA	NA	NA	NA	NA
TR30206|c0_g1_i1	46.9509	92.0109	0.970651	0.0425021	0.994572	No	NA	NA	NA	NA	NA	NA	NA
TR29166|c0_g2_i1	31.3006	61.3406	0.970651	0.0649918	1.08326	No	hypothetical protein MIMGU_mgv1a006156mg	Mimulus guttatus	NA	protein folding[GO:0006457] ; protein peptidyl-prolyl isomerization[GO:0000413]	peptidyl-prolyl cis-trans isomerase activity[GO:0003755]	NA	NA
TR34421|c0_g1_i3	31.3006	61.3406	0.970651	0.0649918	1.08352	No	PREDICTED: NAD-dependent protein deacetylase SRT2	Erythranthe guttatus	NA	NA	NA	NA	NA
TR35755|c0_g6_i1	31.3006	61.3406	0.970651	0.0649918	1.08378	No	hypothetical protein CISIN_1g0280351mg	Citrus sinensis	NA	protein retention in ER lumen[GO:0006621] ; protein transport[GO:0015031]	ER retention sequence binding[GO:0046923]	endoplasmic reticulum membrane[GO:0005789] ; integral component of membrane[GO:0016021]	NA
TR37692|c0_g1_i1	31.3006	61.3406	0.970651	0.0649918	1.0822	No	hypothetical protein MIMGU_mgv1a010581mg	Mimulus guttatus	NA	phosphatidylinositol phosphorylation[GO:0046854]	NA	NA	NA
TR40762|c2_g1_i2	31.3006	61.3406	0.970651	0.0649918	1.08142	No	PREDICTED: probable transcription factor PosF21	Sesamum indicum	NA	NA	NA	NA	NA
TR44440|c0_g1_i1	31.3006	61.3406	0.970651	0.0649918	1.08115	No	hypothetical protein MIMGU_mgv1a000534mg	Mimulus guttatus	NA	isoleucyl-tRNA aminoacylation[GO:0006428] ; regulation of translational fidelity[GO:0006450]	isoleucine-tRNA ligase activity[GO:0004822] ; aminoacyl-tRNA editing activity[GO:0002161] ; ATP binding[GO:0005524]	cytoplasm[GO:0005737]	map00970:Aminoacyl-tRNA biosynthesis(ligase[ec:6.1.1.5])
TR22226|c0_g1_i1	31.3006	61.3406	0.970651	0.0649918	1.08405	No	hypothetical protein MIMGU_mgv1a017313mg	Mimulus guttatus	NA	NA	NA	NA	NA
TR28901|c0_g2_i1	31.3006	61.3406	0.970651	0.0649918	1.08194	No	PREDICTED: bromo adjacent homology domain-containing 1 protein isoform X2	Sesamum indicum	NA	NA	NA	NA	NA
TR29339|c0_g1_i1	31.3006	61.3406	0.970651	0.0649918	1.08299	No	NA	NA	NA	NA	NA	NA	NA
TR31692|c2_g1_i6	31.3006	61.3406	0.970651	0.0649918	1.08273	No	PREDICTED: probable 2-oxoglutarate-dependent dioxygenase At3g49630 isoform X1	Sesamum indicum	NA	NA	NA	NA	NA
TR33642|c0_g2_i1	31.3006	61.3406	0.970651	0.0649918	1.08247	No	eukaryotic translation initiation factor, partial	Panax notoginseng	NA	translational initiation[GO:0006413]	translation initiation factor activity[GO:0003743]	NA	NA
TR37090|c0_g1_i1	31.3006	61.3406	0.970651	0.0649918	1.08168	No	NA	NA	NA	NA	NA	NA	NA
TR7744|c0_g3_i3	31.3006	61.3406	0.970651	0.0649918	1.08089	No	PREDICTED: uncharacterized protein LOC100241395	Vitis vinifera	NA	single-organism developmental process[GO:0044767]	NA	NA	NA
TR22103|c0_g1_i1	31.3006	61.3406	0.970651	0.0649918	1.08063	No	NA	NA	NA	NA	NA	NA	NA
TR3391|c0_g2_i2	15.6503	30.6703	0.970651	0.0835471	1.12204	No	NA	NA	NA	NA	NA	NA	NA
TR37760|c0_g1_i1	15.6503	30.6703	0.970651	0.0835471	1.12138	No	PREDICTED: eukaryotic translation initiation factor 4B	Sesamum indicum	NA	NA	NA	NA	NA
TR40785|c1_g3_i2	15.6503	30.6703	0.970651	0.0835471	1.12116	No	hypothetical protein MIMGU_mgv1a007945mg	Mimulus guttatus	NA	acetyl-CoA biosynthetic process from pyruvate[GO:0006086] ; oxidation-reduction process[GO:0055114]	pyruvate dehydrogenase (acetyl-transferring) activity[GO:0004739]	intracellular membrane-bounded organelle[GO:0043231]	map01130:Biosynthesis of antibiotics(dehydrogenase (acetyl-transferring)[ec:1.2.4.1]) ; map00020:Citrate cycle (TCA cycle)(dehydrogenase (acetyl-transferring)[ec:1.2.4.1]) ; map00620:Pyruvate metabolism(dehydrogenase (acetyl-transferring)[ec:1.2.4.1]) ; map00010:Glycolysis / Gluconeogenesis(dehydrogenase (acetyl-transferring)[ec:1.2.4.1])
TR41021|c0_g2_i1	15.6503	30.6703	0.970651	0.0835471	1.12006	No	PREDICTED: pectinesterase/pectinesterase inhibitor PPE8B-like	Sesamum indicum	NA	NA	NA	NA	NA
TR41378|c1_g2_i2	15.6503	30.6703	0.970651	0.0835471	1.11963	No	PREDICTED: 3-ketoacyl-CoA synthase 11	Sesamum indicum	NA	NA	NA	NA	NA
TR41987|c0_g1_i2	15.6503	30.6703	0.970651	0.0835471	1.11941	No	PREDICTED: uncharacterized protein LOC105179152 isoform X2	Sesamum indicum	NA	NA	NA	NA	NA
TR43001|c0_g1_i5	15.6503	30.6703	0.970651	0.0835471	1.11635	No	hypothetical protein CISIN_1g027225mg	Citrus sinensis	NA	protein phosphorylation[GO:0006468]	protein kinase activity[GO:0004672] ; ATP binding[GO:0005524]	NA	NA
TR18322|c0_g1_i1	15.6503	30.6703	0.970651	0.0835471	1.11853	No	euFUL FRUITFULL-like MADS-box	Antirrhinum majus	NA	regulation of transcription, DNA-templated[GO:0006355] ; transcription, DNA-templated[GO:0006351]	transcription factor activity, sequence-specific DNA binding[GO:0003700] ; DNA binding[GO:0003677] ; protein dimerization activity[GO:0046983]	nucleus[GO:0005634]	NA
TR24607|c0_g1_i1	15.6503	30.6703	0.970651	0.0835471	1.11831	No	PREDICTED: probable threonine--tRNA ligase, cytoplasmic	Sesamum indicum	NA	NA	NA	NA	NA
TR27249|c0_g1_i3	15.6503	30.6703	0.970651	0.0835471	1.1181	No	NA	NA	NA	NA	NA	NA	NA
TR30365|c0_g2_i1	15.6503	30.6703	0.970651	0.0835471	1.11788	No	NA	NA	NA	NA	NA	NA	NA
TR31180|c0_g2_i1	15.6503	30.6703	0.970651	0.0835471	1.11766	No	PREDICTED: UDP-galactose transporter 2	Sesamum indicum	NA	NA	NA	NA	NA
TR32477|c0_g5_i5	15.6503	30.6703	0.970651	0.0835471	1.11744	No	NA	NA	NA	NA	NA	NA	NA
TR34159|c0_g2_i1	15.6503	30.6703	0.970651	0.0835471	1.11701	No	NA	NA	NA	NA	NA	NA	NA
TR36560|c1_g2_i9	15.6503	30.6703	0.970651	0.0835471	1.12182	No	PREDICTED: syntaxin-32-like	Cicer arietinum	NA	NA	NA	NA	NA
TR37479|c1_g8_i1	15.6503	30.6703	0.970651	0.0835471	1.1216	No	hypothetical protein M569_07647, partial	Genlisea aurea	NA	NA	NA	NA	NA
TR40343|c1_g6_i3	15.6503	30.6703	0.970651	0.0835471	1.12094	No	PREDICTED: rho GTPase-activating protein 5	Sesamum indicum	NA	NA	NA	NA	NA
TR40868|c0_g3_i1	15.6503	30.6703	0.970651	0.0835471	1.12072	No	PREDICTED: peptide-N(4)-(N-acetyl-beta-glucosaminyl)asparagine amidase isoform X3	Sesamum indicum	NA	NA	NA	NA	NA
TR41702|c1_g5_i2	15.6503	30.6703	0.970651	0.0835471	1.11984	No	NA	NA	NA	NA	NA	NA	NA
TR41867|c2_g5_i1	15.6503	30.6703	0.970651	0.0835471	1.11722	No	PREDICTED: uncharacterized protein At5g08430	Sesamum indicum	NA	NA	NA	NA	NA
TR42091|c0_g3_i1	15.6503	30.6703	0.970651	0.0835471	1.11679	No	NA	NA	NA	NA	NA	NA	NA
TR42257|c1_g2_i1	15.6503	30.6703	0.970651	0.0835471	1.11657	No	PREDICTED: UDP-sugar pyrophosphorylase	Nicotiana tomentosiformis	NA	NA	NA	NA	NA
TR42913|c1_g10_i1	15.6503	30.6703	0.970651	0.0835471	1.11614	No	hypothetical protein MIMGU_mgv1a0066581mg, partial	Mimulus guttatus	NA	fructose 2,6-bisphosphate metabolic process[GO:0006003]	ATP binding[GO:0005524] ; starch binding[GO:2001070] ; catalytic activity[GO:0003824]	NA	NA
TR43335|c0_g1_i5	15.6503	30.6703	0.970651	0.0835471	1.12248	No	PREDICTED: uncharacterized protein LOC105172898 isoform X1	Sesamum indicum	NA	NA	NA	NA	NA
TR44018|c4_g1_i4	15.6503	30.6703	0.970651	0.0835471	1.12226	No	unnamed protein product	Coffea canephora	NA	NA	NA	NA	NA
TR32437|c0_g3_i1	15.6503	30.6703	0.970651	0.0835471	1.11919	No	hypothetical protein MIMGU_mgv1a009228mg	Mimulus guttatus	NA	cellular oxidant detoxification[GO:0098869] ; response to oxidative stress[GO:0006979] ; hydrogen peroxide catabolic process[GO:0042744] ; oxidation-reduction process[GO:0055114]	metal ion binding[GO:0046872] ; heme binding[GO:0020037] ; peroxidase activity[GO:0004601]	extracellular region[GO:0005576]	map00940:Phenylpropanoid biosynthesis(lactoperoxidase[ec:1.11.1.7])
TR34816|c3_g2_i3	15.6503	30.6703	0.970651	0.0835471	1.11875	No	PREDICTED: homeobox-leucine zipper protein HAT4-like	Sesamum indicum	NA	NA	NA	NA	NA
TR37752|c0_g4_i4	15.6503	30.6703	0.970651	0.0835471	1.11897	No	hypothetical protein MIMGU_mgv1a0063822mg, partial	Mimulus guttatus	NA	NA	NA	integral component of membrane[GO:0016021]	NA
TR38865|c0_g2_i3	15.6503	30.6703	0.970651	0.0835471	1.12028	No	PREDICTED: magnesium transporter MRS2-3	Erythranthe guttatus	NA	NA	NA	NA	NA
TR44881|c6_g1_i4	15.6503	30.6703	0.970651	0.0835471	1.1205	No	PREDICTED: uncharacterized protein LOC105164266	Sesamum indicum	NA	NA	NA	NA	NA
TR38512|c0_g1_i6	91.9456	179.932	0.968603	0.01756	0.791321	No	PREDICTED: serine carboxypeptidase-like 20	Sesamum indicum	NA	NA	NA	NA	NA
TR30860|c1_g3_i5	60.645	118.592	0.967545	0.0313199	0.936009	No	PREDICTED: putative GATA transcription factor 22	Sesamum indicum	NA	NA	NA	NA	NA
TR37723|c0_g1_i1	89.9893	175.843	0.966463	0.0183883	0.803823	No	PREDICTED: bifunctional L-3-cyanoalanine synthase/cysteine synthase 1, mitochondrial	Sesamum indicum	NA	NA	NA	NA	NA
TR32035|c0_g3_i2	89.9893	175.843	0.966463	0.0183883	0.803311	No	PREDICTED: benzyl alcohol O-benzoyltransferase-like	Sesamum indicum	NA	NA	NA	NA	NA
TR44878|c3_g4_i1	44.9947	87.9216	0.966463	0.0457275	1.00234	No	PREDICTED: clathrin heavy chain 1-like	Zea mays	NA	NA	NA	NA	NA
TR31980|c2_g1_i1	44.9947	87.9216	0.966463	0.0457275	1.00202	No	PREDICTED: xylogen-like protein 11-like	Cicer arietinum	NA	NA	NA	NA	NA
TR33702|c0_g4_i1	344.307	672.702	0.966273	0.00563868	0.526177	No	PREDICTED: salicylate carboxymethyltransferase-like	Sesamum indicum	NA	NA	NA	NA	NA
TR32315|c0_g3_i1	1060.31	2071.27	0.96603	0.00728192	0.59176	No	NA	NA	NA	NA	NA	NA	NA
TR26365|c0_g1_i3	119.334	233.094	0.965913	0.0127287	0.712671	No	hypothetical protein EUTSA_v10009020mg	Eutrema salsugineum	NA	electron transport chain[GO:0022900]	metal ion binding[GO:0046872] ; electron carrier activity[GO:0009055] ; 2 iron, 2 sulfur cluster binding[GO:0051537]	NA	NA
TR37612|c1_g6_i1	74.339	145.173	0.96558	0.0242728	0.859474	No	PREDICTED: uncharacterized protein LOC105164832	Sesamum indicum	NA	NA	NA	NA	NA
TR37841|c0_g5_i3	74.339	145.173	0.96558	0.0242728	0.85903	No	PREDICTED: probable WRKY transcription factor 40	Sesamum indicum	NA	NA	NA	NA	NA
TR2343|c0_g2_i1	401.039	783.115	0.965481	0.00543488	0.519891	No	PREDICTED: uncharacterized protein LOC105956780	Erythranthe guttatus	NA	NA	NA	NA	NA
TR33799|c0_g4_i3	58.6887	114.502	0.964225	0.0333334	0.935831	No	hypothetical protein MIMGU_mgv1a009899mg	Mimulus guttatus	NA	NA	NA	NA	NA
TR25115|c0_g1_i4	29.3443	57.2512	0.964225	0.0710749	1.1019	No	PREDICTED: auxin-responsive protein IAA14	Sesamum indicum	NA	NA	NA	NA	NA
TR43116|c0_g1_i2	29.3443	57.2512	0.964225	0.0710749	1.10165	No	NA	NA	NA	NA	NA	NA	NA
TR39844|c1_g3_i1	29.3443	57.2512	0.964225	0.0710749	1.1014	No	hypothetical protein M569_15136, partial	Genlisea aurea	NA	NA	NA	NA	NA
TR42318|c0_g1_i2	203.454	396.669	0.963234	0.00789784	0.61001	No	hypothetical protein MIMGU_mgv1a001338mg	Mimulus guttatus	NA	urea catabolic process[GO:0043419]	nickel cation binding[GO:0016151] ; urease activity[GO:0009039]	NA	map00220:Arginine biosynthesis(ec:3.5.1.5 urease[ec:3.5.1.5]) ; map00791:Atrazine degradation(ec:3.5.1.5 urease[ec:3.5.1.5]) ; map00230:Purine metabolism(ec:3.5.1.5 urease[ec:3.5.1.5])
TR2248|c1_g1_i2	101.727	198.335	0.963234	0.015855	0.773434	No	basic helix-loop-helix transcription factor	Salvia miltiorrhiza	NA	NA	NA	NA	NA
TR28619|c0_g1_i2	72.3827	141.083	0.962832	0.0256321	0.87377	No	PREDICTED: protein COBRA-like	Sesamum indicum	NA	NA	NA	NA	NA
TR28224|c0_g9_i3	332.569	648.166	0.962709	0.00589471	0.531974	No	hypothetical protein MIMGU_mgv1a013702mg	Mimulus guttatus	NA	NA	NA	NA	NA
TR43384|c0_g3_i2	129.115	251.497	0.961881	0.0120579	0.700265	No	unnamed protein product	Coffea canephora	NA	NA	NA	NA	NA
TR43244|c0_g2_i1	43.0384	83.8322	0.961881	0.049286	1.03629	No	PREDICTED: pentatricopeptide repeat-containing protein At1g63080, mitochondrial-like	Sesamum indicum	NA	NA	NA	NA	NA
TR37214|c0_g2_i3	43.0384	83.8322	0.961881	0.049286	1.03597	No	PREDICTED: protein LOW PSII ACCUMULATION 3, chloroplastic isoform X2	Nelumbo nucifera	NA	NA	NA	NA	NA
TR30927|c2_g1_i2	1520.04	2960.71	0.961836	0.0103449	0.668731	No	PREDICTED: phosphoglycolate phosphatase 1B, chloroplastic-like	Pyrus x bretschneideri	NA	NA	NA	NA	NA
TR33735|c2_g2_i3	610.362	1187.96	0.960753	0.00569846	0.528877	No	allene oxide cyclase	Salvia miltiorrhiza	NA	metabolic process[GO:0008152]	isomerase activity[GO:0016853]	chloroplast[GO:0009507]	NA
TR42831|c1_g1_i1	70.4264	136.994	0.959925	0.0270933	0.892102	No	PREDICTED: probable protein phosphatase 2C 33	Sesamum indicum	NA	NA	NA	NA	NA
TR41137|c0_g1_i1	154.547	300.569	0.959652	0.0102739	0.667289	No	PREDICTED: phosphate transporter PHO1 homolog 1	Sesamum indicum	NA	NA	NA	NA	NA
TR42608|c0_g2_i1	84.1204	163.575	0.959424	0.0212688	0.839819	No	PREDICTED: pentatricopeptide repeat-containing protein At1g02150	Sesamum indicum	NA	NA	NA	NA	NA
TR41229|c1_g1_i2	377.564	734.043	0.959144	0.00582975	0.529596	No	PREDICTED: protein transport protein SEC31 homolog B	Sesamum indicum	NA	NA	NA	NA	NA
TR38905|c1_g2_i1	391.258	760.624	0.959063	0.00578145	0.530834	No	basic helix-loop-helix transcription factor	Salvia miltiorrhiza	NA	NA	protein dimerization activity[GO:0046983]	NA	NA
TR2416|c0_g2_i1	97.8145	190.156	0.959063	0.0172453	0.790646	No	NA	NA	NA	NA	NA	NA	NA
TR28544|c0_g2_i2	219.104	425.295	0.956845	0.0078785	0.60989	No	PREDICTED: LOW QUALITY PROTEIN: linoleate 13S-lipoxygenase 3-1, chloroplastic	Sesamum indicum	NA	NA	NA	NA	NA
TR27269|c0_g1_i1	95.8582	186.067	0.956845	0.0180196	0.797362	No	hypothetical protein MIMGU_mgv1a017847mg	Mimulus guttatus	NA	NA	NA	NA	NA
TR2876|c1_g2_i1	82.1641	159.486	0.956845	0.0223791	0.854629	No	NA	NA	NA	NA	NA	NA	NA
TR35041|c0_g4_i2	68.4701	132.905	0.956845	0.0286638	0.915681	No	PREDICTED: probable ribose-5-phosphate isomerase 3, chloroplastic	Sesamum indicum	NA	NA	NA	NA	NA
TR39326|c0_g2_i5	68.4701	132.905	0.956845	0.0286638	0.915255	No	PREDICTED: mitogen-activated protein kinase 3	Sesamum indicum	NA	NA	NA	NA	NA
TR41624|c0_g3_i9	68.4701	132.905	0.956845	0.0286638	0.914829	No	PREDICTED: UDP-glycosyltransferase 74E2-like	Sesamum indicum	NA	NA	NA	NA	NA
TR42391|c0_g2_i2	68.4701	132.905	0.956845	0.0286638	0.916108	No	NA	NA	NA	NA	NA	NA	NA
TR41420|c0_g7_i1	68.4701	132.905	0.956845	0.0286638	0.914403	No	PREDICTED: protein EXECUTER 1, chloroplastic	Sesamum indicum	NA	NA	NA	NA	NA
TR30954|c0_g2_i1	41.0821	79.7428	0.956845	0.0532125	1.05757	No	PREDICTED: signal recognition particle receptor subunit beta-like isoform X1	Sesamum indicum	NA	NA	NA	NA	NA
TR32831|c1_g1_i1	41.0821	79.7428	0.956845	0.0532125	1.05788	No	PREDICTED: phosphatidate phosphatase PAH2 isoform X1	Sesamum indicum	NA	NA	NA	NA	NA
TR7583|c2_g1_i1	41.0821	79.7428	0.956845	0.0532125	1.05819	No	NA	NA	NA	NA	NA	NA	NA
TR38972|c1_g5_i1	27.388	53.1619	0.956845	0.0778633	1.11537	No	PREDICTED: uncharacterized protein LOC105172351	Sesamum indicum	NA	NA	NA	NA	NA
TR42913|c1_g7_i1	27.388	53.1619	0.956845	0.0778633	1.11701	No	hypothetical protein L484_007586	Morus notabilis	NA	fructose metabolic process[GO:0006000] ; carbohydrate phosphorylation[GO:0046835] ; fructose 2,6-bisphosphate metabolic process[GO:0006003]	6-phosphofructo-2-kinase activity[GO:0003873] ; ATP binding[GO:0005524] ; starch binding[GO:2001070]	NA	map00051:Fructose and mannose metabolism(phosphofructokinase 2[ec:2.7.1.105])
TR24553|c0_g1_i3	27.388	53.1619	0.956845	0.0778633	1.11561	No	PREDICTED: translation initiation factor IF-3, chloroplastic	Sesamum indicum	NA	NA	NA	NA	NA
TR3965|c0_g1_i2	27.388	53.1619	0.956845	0.0778633	1.11677	No	PREDICTED: uncharacterized protein LOC104109530	Nicotiana tomentosiformis	NA	NA	NA	NA	NA
TR40831|c0_g6_i1	27.388	53.1619	0.956845	0.0778633	1.11724	No	PREDICTED: zinc finger CCCH domain-containing protein 29	Sesamum indicum	NA	NA	NA	NA	NA
TR42252|c0_g2_i1	27.388	53.1619	0.956845	0.0778633	1.11631	No	PREDICTED: uncharacterized protein LOC105968763	Erythranthe guttatus	NA	NA	NA	NA	NA
TR43828|c0_g1_i6	27.388	53.1619	0.956845	0.0778633	1.11654	No	PREDICTED: myosin heavy chain, striated muscle	Erythranthe guttatus	NA	NA	NA	NA	NA
TR39004|c0_g2_i1	27.388	53.1619	0.956845	0.0778633	1.11607	No	PREDICTED: bifunctional riboflavin kinase/FMN phosphatase-like isoform X3	Sesamum indicum	NA	NA	NA	NA	NA
TR7878|c0_g4_i11	27.388	53.1619	0.956845	0.0778633	1.11584	No	NA	NA	NA	NA	NA	NA	NA
TR29633|c0_g2_i2	13.694	26.5809	0.956845	0.0827529	1.12861	No	cellulose synthase catalytic subunit, partial	Genlisea aurea	NA	cellulose biosynthetic process[GO:0030244]	cellulose synthase (UDP-forming) activity[GO:0016760]	integral component of membrane[GO:0016021]	map00500:Starch and sucrose metabolism(synthase (UDP-forming)[ec:2.4.1.12])
TR31626|c1_g3_i6	13.694	26.5809	0.956845	0.0827529	1.12906	No	PREDICTED: transmembrane emp24 domain-containing protein p24delta3-like	Sesamum indicum	NA	NA	NA	NA	NA
TR31793|c0_g2_i1	13.694	26.5809	0.956845	0.0827529	1.12816	No	PREDICTED: peptidyl-tRNA hydrolase ICT1, mitochondrial-like isoform X1	Sesamum indicum	NA	NA	NA	NA	NA
TR36635|c0_g3_i1	13.694	26.5809	0.956845	0.0827529	1.12951	No	PREDICTED: patatin-like protein 2	Sesamum indicum	NA	NA	NA	NA	NA
TR36738|c0_g2_i1	13.694	26.5809	0.956845	0.0827529	1.12973	No	hypothetical protein MIMGU_mgv1a011760mg	Mimulus guttatus	NA	NA	tRNA binding[GO:0000049]	NA	NA
TR38063|c2_g4_i1	13.694	26.5809	0.956845	0.0827529	1.12996	No	hypothetical protein VITISV_019292	Vitis vinifera	NA	protein phosphorylation[GO:0006468]	protein kinase activity[GO:0004672] ; ATP binding[GO:0005524]	NA	NA
TR38991|c0_g3_i1	13.694	26.5809	0.956845	0.0827529	1.13131	No	PREDICTED: cysteine--tRNA ligase, cytoplasmic isoform X1	Sesamum indicum	NA	NA	NA	NA	NA
TR40316|c0_g3_i1	13.694	26.5809	0.956845	0.0827529	1.13176	No	NA	NA	NA	NA	NA	NA	NA
TR41108|c0_g3_i2	13.694	26.5809	0.956845	0.0827529	1.13402	No	PREDICTED: probable indole-3-acetic acid-amido synthetase GH3.5	Nicotiana tomentosiformis	NA	NA	NA	NA	NA
TR42661|c0_g2_i1	13.694	26.5809	0.956845	0.0827529	1.13606	No	PREDICTED: protein TPLATE	Erythranthe guttatus	NA	NA	NA	NA	NA
TR43941|c0_g3_i1	13.694	26.5809	0.956845	0.0827529	1.13652	No	PREDICTED: uncharacterized protein LOC105170420	Sesamum indicum	NA	NA	NA	NA	NA
TR43962|c0_g1_i5	13.694	26.5809	0.956845	0.0827529	1.13086	No	NA	NA	NA	NA	NA	NA	NA
TR7472|c0_g1_i2	13.694	26.5809	0.956845	0.0827529	1.12883	No	PREDICTED: uncharacterized protein LOC104223509 isoform X2	Nicotiana sylvestris	NA	NA	NA	NA	NA
TR1657|c0_g3_i1	13.694	26.5809	0.956845	0.0827529	1.13675	No	PREDICTED: probable manganese-transporting ATPase PDR2	Sesamum indicum	NA	NA	NA	NA	NA
TR25345|c0_g1_i5	13.694	26.5809	0.956845	0.0827529	1.13018	No	NA	NA	NA	NA	NA	NA	NA
TR26992|c0_g1_i1	13.694	26.5809	0.956845	0.0827529	1.12838	No	NA	NA	NA	NA	NA	NA	NA
TR31451|c0_g2_i2	13.694	26.5809	0.956845	0.0827529	1.12794	No	PREDICTED: probable ADP-ribosylation factor GTPase-activating protein AGD5	Sesamum indicum	NA	NA	NA	NA	NA
TR31500|c2_g1_i2	13.694	26.5809	0.956845	0.0827529	1.12928	No	PREDICTED: beta-galactosidase-like	Sesamum indicum	NA	NA	NA	NA	NA
TR32162|c0_g1_i2	13.694	26.5809	0.956845	0.0827529	1.13425	No	NA	NA	NA	NA	NA	NA	NA
TR32522|c0_g4_i1	13.694	26.5809	0.956845	0.0827529	1.13561	No	PREDICTED: low molecular weight phosphotyrosine protein phosphatase	Erythranthe guttatus	NA	NA	NA	NA	NA
TR33371|c0_g1_i1	13.694	26.5809	0.956845	0.0827529	1.13584	No	PREDICTED: vacuolar protein sorting-associated protein 24 homolog 1-like	Sesamum indicum	NA	NA	NA	NA	NA
TR34472|c0_g6_i6	13.694	26.5809	0.956845	0.0827529	1.13629	No	PREDICTED: probable receptor-like protein kinase At2g42960	Erythranthe guttatus	NA	NA	NA	NA	NA
TR35311|c0_g7_i1	13.694	26.5809	0.956845	0.0827529	1.13538	No	PREDICTED: ubiquitin-conjugating enzyme E2 5-like	Sesamum indicum	NA	NA	NA	NA	NA
TR39329|c4_g3_i1	13.694	26.5809	0.956845	0.0827529	1.13515	No	PREDICTED: transcription factor TCP2-like	Erythranthe guttatus	NA	NA	NA	NA	NA
TR40020|c0_g1_i1	13.694	26.5809	0.956845	0.0827529	1.13493	No	NA	NA	NA	NA	NA	NA	NA
TR4042|c0_g2_i6	13.694	26.5809	0.956845	0.0827529	1.1347	No	PREDICTED: BES1/BZR1 homolog protein 4-like	Sesamum indicum	NA	NA	NA	NA	NA
TR40720|c0_g7_i2	13.694	26.5809	0.956845	0.0827529	1.13379	No	PREDICTED: transcription factor TCP5-like	Sesamum indicum	NA	NA	NA	NA	NA
TR40818|c0_g6_i3	13.694	26.5809	0.956845	0.0827529	1.13357	No	PREDICTED: histidine biosynthesis bifunctional protein hisIE, chloroplastic	Sesamum indicum	NA	NA	NA	NA	NA
TR43335|c0_g8_i1	13.694	26.5809	0.956845	0.0827529	1.13334	No	PREDICTED: uncharacterized protein LOC105172898 isoform X2	Sesamum indicum	NA	NA	NA	NA	NA
TR43394|c1_g2_i1	13.694	26.5809	0.956845	0.0827529	1.13447	No	hypothetical protein MIMGU_mgv1a010546mg	Mimulus guttatus	NA	NA	NA	NA	NA
TR43738|c0_g10_i1	13.694	26.5809	0.956845	0.0827529	1.13312	No	SecA homolog	Pisum sativum=peas, Peptide Chloroplast Partial, 276 aa	NA	protein import[GO:0017038] ; protein targeting[GO:0006605]	ATP binding[GO:0005524]	intracellular[GO:0005622] ; membrane[GO:0016020]	NA
TR472|c0_g1_i1	13.694	26.5809	0.956845	0.0827529	1.13289	No	NA	NA	NA	NA	NA	NA	NA
TR518|c0_g1_i1	13.694	26.5809	0.956845	0.0827529	1.13266	No	hypothetical protein MIMGU_mgv1a013164mg	Mimulus guttatus	NA	ATP hydrolysis coupled proton transport[GO:0015991]	proton-transporting ATPase activity, rotational mechanism[GO:0046961]	proton-transporting two-sector ATPase complex, catalytic domain[GO:0033178]	NA
TR7697|c1_g2_i2	13.694	26.5809	0.956845	0.0827529	1.13244	No	NA	NA	NA	NA	NA	NA	NA
TR7982|c0_g3_i2	13.694	26.5809	0.956845	0.0827529	1.13199	No	NA	NA	NA	NA	NA	NA	NA
TR8247|c1_g4_i6	13.694	26.5809	0.956845	0.0827529	1.13153	No	PREDICTED: uncharacterized protein LOC105166393	Sesamum indicum	NA	NA	NA	NA	NA
TR9578|c0_g1_i1	13.694	26.5809	0.956845	0.0827529	1.13108	No	hypothetical protein MIMGU_mgv1a005271mg	Mimulus guttatus	NA	metabolic process[GO:0008152]	transferase activity, transferring hexosyl groups[GO:0016758]	NA	NA
TR29665|c0_g1_i3	13.694	26.5809	0.956845	0.0827529	1.13041	No	NA	NA	NA	NA	NA	NA	NA
TR39584|c0_g1_i3	13.694	26.5809	0.956845	0.0827529	1.13063	No	PREDICTED: F-box protein At1g70590	Sesamum indicum	NA	NA	NA	NA	NA
TR44208|c1_g2_i1	13.694	26.5809	0.956845	0.0827529	1.13221	No	NA	NA	NA	NA	NA	NA	NA
TR37303|c0_g1_i3	134.984	261.72	0.955236	0.0121271	0.703689	No	PREDICTED: bifunctional nitrilase/nitrile hydratase NIT4A	Sesamum indicum	NA	NA	NA	NA	NA
TR35931|c0_g1_i1	80.2079	155.396	0.954136	0.0235745	0.859143	No	PREDICTED: glyoxylate/hydroxypyruvate reductase HPR3-like	Citrus sinensis	NA	NA	NA	NA	NA
TR35701|c0_g1_i5	66.5138	128.815	0.953578	0.0303513	0.935179	No	hypothetical protein MIMGU_mgv1a021874mg	Mimulus guttatus	NA	NA	NA	integral component of membrane[GO:0016021]	NA
TR34017|c4_g3_i4	105.64	204.469	0.952729	0.0162962	0.778347	No	PREDICTED: protein NLP7-like isoform X1	Erythranthe guttatus	NA	NA	NA	NA	NA
TR34973|c1_g8_i5	52.8198	102.234	0.952729	0.040704	0.991393	No	hypothetical protein B456_009G265500	Gossypium raimondii	NA	NA	NA	NA	NA
TR4018|c1_g1_i2	52.8198	102.234	0.952729	0.040704	0.991041	No	PREDICTED: protein CURVATURE THYLAKOID 1A, chloroplastic-like	Sesamum indicum	NA	NA	NA	NA	NA
TR7632|c2_g2_i1	91.9456	177.888	0.952115	0.0197482	0.831985	No	PREDICTED: AP2/ERF and B3 domain-containing transcription factor RAV1-like	Sesamum indicum	NA	NA	NA	NA	NA
TR35249|c0_g1_i3	170.197	329.195	0.951734	0.010045	0.65992	No	PREDICTED: vegetative incompatibility protein HET-E-1-like	Sesamum indicum	NA	NA	NA	NA	NA
TR28878|c2_g1_i3	3752.16	7256.6	0.95157	0.0322778	0.934109	No	PREDICTED: glutamine synthetase leaf isozyme, chloroplastic	Sesamum indicum	NA	NA	NA	NA	NA
TR35663|c2_g2_i2	156.503	302.614	0.951286	0.0108564	0.673246	No	hypothetical protein MIMGU_mgv1a022496mg, partial	Mimulus guttatus	NA	NA	NA	NA	NA
TR35971|c3_g2_i2	39.1258	75.6534	0.951286	0.0575447	1.06012	No	PREDICTED: homeobox-leucine zipper protein HAT5-like	Sesamum indicum	NA	NA	NA	NA	NA
TR37205|c0_g7_i1	39.1258	75.6534	0.951286	0.0575447	1.05983	No	hypothetical protein MIMGU_mgv1a011930mg	Mimulus guttatus	NA	NA	NA	endoplasmic reticulum membrane[GO:0005789]	NA
TR36250|c0_g1_i1	2977.47	5755.8	0.950927	0.0240657	0.857453	No	PREDICTED: putative ion channel POLLUX-like 2 isoform X2	Sesamum indicum	NA	NA	NA	NA	NA
TR44761|c0_g2_i2	64.5575	124.726	0.950104	0.0321842	0.935742	No	NA	NA	NA	NA	NA	NA	NA
TR43326|c0_g6_i2	541.892	1046.88	0.950018	0.00611902	0.538749	No	hypothetical protein B456_007G020600	Gossypium raimondii	NA	NA	ATP binding[GO:0005524]	NA	NA
TR43305|c0_g4_i1	219.104	423.25	0.949893	0.00835211	0.614642	No	hypothetical protein MIMGU_mgv1a001035mg	Mimulus guttatus	NA	oxylipin biosynthetic process[GO:0031408] ; oxidation-reduction process[GO:0055114]	metal ion binding[GO:0046872] ; oxidoreductase activity, acting on single donors with incorporation of molecular oxygen, incorporation of two atoms of oxygen[GO:0016702]	NA	NA
TR32032|c1_g2_i5	475.378	918.065	0.94952	0.00611806	0.539356	No	NA	NA	NA	NA	NA	NA	NA
TR43260|c1_g2_i5	140.853	271.943	0.949118	0.0121926	0.7057	No	PREDICTED: protein NRT1/ PTR FAMILY 2.11-like	Nicotiana tomentosiformis	NA	NA	NA	NA	NA
TR32032|c1_g2_i6	279.749	539.797	0.948283	0.00724545	0.5916	No	NA	NA	NA	NA	NA	NA	NA
TR38928|c0_g1_i3	152.591	294.435	0.948283	0.011378	0.68575	No	PREDICTED: LOW QUALITY PROTEIN: beta-galactosidase-like	Erythranthe guttatus	NA	NA	NA	NA	NA
TR32150|c0_g1_i1	101.727	196.29	0.948283	0.0176871	0.789784	No	NA	NA	NA	NA	NA	NA	NA
TR36889|c1_g2_i1	50.8635	98.145	0.948283	0.0436928	1.00126	No	PREDICTED: ocs element-binding factor 1	Sesamum indicum	NA	NA	NA	NA	NA
TR44131|c4_g2_i1	50.8635	98.145	0.948283	0.0436928	1.00092	No	hypothetical protein MIMGU_mgv1a001324mg	Mimulus guttatus	NA	NA	ATP binding[GO:0005524]	NA	NA
TR40411|c0_g2_i1	50.8635	98.145	0.948283	0.0436928	1.00159	No	PREDICTED: uncharacterized protein LOC105162629	Sesamum indicum	NA	NA	NA	NA	NA
TR30757|c1_g2_i2	25.4318	49.0725	0.948283	0.0852508	1.11735	No	PREDICTED: SNAP25 homologous protein SNAP33	Sesamum indicum	NA	NA	NA	NA	NA
TR35756|c0_g1_i2	25.4318	49.0725	0.948283	0.0852508	1.11607	No	PREDICTED: uncharacterized protein LOC105178089	Sesamum indicum	NA	NA	NA	NA	NA
TR39398|c0_g3_i1	25.4318	49.0725	0.948283	0.0852508	1.11714	No	hypothetical protein MIMGU_mgv1a009842mg	Mimulus guttatus	NA	NA	NA	NA	NA
TR40421|c1_g3_i1	25.4318	49.0725	0.948283	0.0852508	1.11928	No	PREDICTED: G-box-binding factor 1-like isoform X2	Sesamum indicum	NA	NA	NA	NA	NA
TR40741|c0_g1_i1	25.4318	49.0725	0.948283	0.0852508	1.11756	No	PREDICTED: pentatricopeptide repeat-containing protein At2g45350, chloroplastic	Erythranthe guttatus	NA	NA	NA	NA	NA
TR41109|c0_g2_i3	25.4318	49.0725	0.948283	0.0852508	1.11543	No	hypothetical protein MIMGU_mgv1a002663mg	Mimulus guttatus	NA	protein ubiquitination[GO:0016567]	ligase activity[GO:0016874] ; ubiquitin-protein transferase activity[GO:0004842]	NA	NA
TR42512|c0_g4_i14	25.4318	49.0725	0.948283	0.0852508	1.11863	No	PREDICTED: myosin-9 isoform X3	Sesamum indicum	NA	NA	NA	NA	NA
TR42930|c0_g2_i1	25.4318	49.0725	0.948283	0.0852508	1.11906	No	NA	NA	NA	NA	NA	NA	NA
TR43127|c2_g5_i5	25.4318	49.0725	0.948283	0.0852508	1.11522	No	PREDICTED: putative late blight resistance protein homolog R1A-10	Sesamum indicum	NA	NA	NA	NA	NA
TR10043|c0_g2_i1	25.4318	49.0725	0.948283	0.0852508	1.11565	No	NA	NA	NA	NA	NA	NA	NA
TR25223|c0_g1_i1	25.4318	49.0725	0.948283	0.0852508	1.11671	No	hypothetical protein M569_03569, partial	Genlisea aurea	NA	trehalose biosynthetic process[GO:0005992]	catalytic activity[GO:0003824]	NA	NA
TR2669|c1_g1_i6	25.4318	49.0725	0.948283	0.0852508	1.11586	No	PREDICTED: tryptophan--tRNA ligase, cytoplasmic-like	Phoenix dactylifera	NA	NA	NA	NA	NA
TR2981|c0_g1_i1	25.4318	49.0725	0.948283	0.0852508	1.11692	No	hypothetical protein MIMGU_mgv1a013474mg	Mimulus guttatus	NA	NA	NA	NA	NA
TR38742|c0_g3_i3	25.4318	49.0725	0.948283	0.0852508	1.11628	No	hypothetical protein MIMGU_mgv1a007859mg	Mimulus guttatus	NA	nucleotide biosynthetic process[GO:0009165] ; nucleoside metabolic process[GO:0009116]	ribose phosphate diphosphokinase activity[GO:0004749] ; magnesium ion binding[GO:0000287]	NA	map00030:Pentose phosphate pathway(diphosphokinase[ec:2.7.6.1]) ; map01130:Biosynthesis of antibiotics(diphosphokinase[ec:2.7.6.1]) ; map00230:Purine metabolism(diphosphokinase[ec:2.7.6.1])
TR41021|c0_g4_i1	25.4318	49.0725	0.948283	0.0852508	1.1165	No	PREDICTED: pectinesterase/pectinesterase inhibitor PPE8B-like	Sesamum indicum	NA	NA	NA	NA	NA
TR43662|c3_g5_i1	25.4318	49.0725	0.948283	0.0852508	1.11778	No	PREDICTED: E3 ubiquitin-protein ligase MBR2-like isoform X2	Sesamum indicum	NA	NA	NA	NA	NA
TR44446|c1_g2_i1	25.4318	49.0725	0.948283	0.0852508	1.11799	No	PREDICTED: pentatricopeptide repeat-containing protein At1g08070 isoform X2	Sesamum indicum	NA	NA	NA	NA	NA
TR17279|c0_g1_i1	25.4318	49.0725	0.948283	0.0852508	1.11821	No	NA	NA	NA	NA	NA	NA	NA
TR28658|c1_g1_i1	25.4318	49.0725	0.948283	0.0852508	1.11842	No	NA	NA	NA	NA	NA	NA	NA
TR3270|c0_g2_i1	25.4318	49.0725	0.948283	0.0852508	1.11885	No	NA	NA	NA	NA	NA	NA	NA
TR37450|c1_g1_i7	88.033	169.709	0.946947	0.0217509	0.851501	No	hypothetical protein MIMGU_mgv1a006089mg	Mimulus guttatus	NA	metabolic process[GO:0008152]	transferase activity, transferring acyl groups other than amino-acyl groups[GO:0016747]	NA	NA
TR39548|c0_g1_i1	311.05	599.093	0.945634	0.00703261	0.58114	No	PREDICTED: uncharacterized protein LOC105169457	Sesamum indicum	NA	NA	NA	NA	NA
TR38271|c0_g1_i2	111.508	214.692	0.945116	0.0161105	0.780347	No	PREDICTED: methionine aminopeptidase 1D, chloroplastic/mitochondrial-like	Populus euphratica	NA	NA	NA	NA	NA
TR20726|c0_g1_i1	37.1695	71.5641	0.945116	0.0623227	1.07212	No	hypothetical protein MIMGU_mgv1a001155mg	Mimulus guttatus	NA	NA	NA	integral component of membrane[GO:0016021]	NA
TR28167|c0_g2_i2	37.1695	71.5641	0.945116	0.0623227	1.07292	No	PREDICTED: calmodulin-binding transcription activator 1	Sesamum indicum	NA	NA	NA	NA	NA
TR34717|c0_g5_i1	37.1695	71.5641	0.945116	0.0623227	1.07158	No	PREDICTED: uncharacterized protein LOC105171728	Sesamum indicum	NA	NA	NA	NA	NA
TR35124|c0_g1_i5	37.1695	71.5641	0.945116	0.0623227	1.07265	No	hypothetical protein JCGZ_04419	Jatropha curcas	NA	carbohydrate metabolic process[GO:0005975]	hydrolase activity, hydrolyzing O-glycosyl compounds[GO:0004553]	NA	NA
TR8112|c0_g3_i1	37.1695	71.5641	0.945116	0.0623227	1.07104	No	PREDICTED: UDP-glucuronate 4-epimerase 3	Nicotiana tomentosiformis	NA	NA	NA	NA	NA
TR27590|c0_g2_i1	37.1695	71.5641	0.945116	0.0623227	1.07131	No	hypothetical protein MIMGU_mgv1a016344mg	Mimulus guttatus	NA	NA	NA	integral component of membrane[GO:0016021]	NA
TR35495|c2_g2_i2	37.1695	71.5641	0.945116	0.0623227	1.07319	No	PREDICTED: uncharacterized protein LOC105159538	Sesamum indicum	NA	NA	NA	NA	NA
TR26471|c1_g1_i3	37.1695	71.5641	0.945116	0.0623227	1.07185	No	hypothetical protein MIMGU_mgv1a000659mg	Mimulus guttatus	NA	NA	NA	integral component of membrane[GO:0016021]	NA
TR38771|c2_g1_i1	37.1695	71.5641	0.945116	0.0623227	1.07238	No	NA	NA	NA	NA	NA	NA	NA
TR36720|c0_g1_i1	295.4	568.423	0.944297	0.00728909	0.591641	No	hypothetical protein POPTR_0005s27550g	Populus trichocarpa	NA	oxidation-reduction process[GO:0055114]	oxidoreductase activity, acting on the aldehyde or oxo group of donors, NAD or NADP as acceptor[GO:0016620]	NA	NA
TR30934|c5_g2_i2	134.984	259.675	0.943921	0.0132341	0.717537	No	PREDICTED: probable LRR receptor-like serine/threonine-protein kinase At3g47570	Sesamum indicum	NA	NA	NA	NA	NA
TR39705|c0_g1_i2	2441.45	4696.65	0.943894	0.0196427	0.833167	No	cytochrome P450 CYP74B21	Salvia miltiorrhiza	NA	oxidation-reduction process[GO:0055114]	heme binding[GO:0020037] ; oxidoreductase activity, acting on paired donors, with incorporation or reduction of molecular oxygen[GO:0016705] ; monooxygenase activity[GO:0004497] ; iron ion binding[GO:0005506]	NA	NA
TR33095|c0_g4_i1	416.69	801.517	0.943761	0.00652026	0.553471	No	NA	NA	NA	NA	NA	NA	NA
TR7402|c0_g2_i1	97.8145	188.111	0.943466	0.0192949	0.825563	No	putative heat shock protein 90, partial	Ginkgo biloba	NA	protein folding[GO:0006457] ; response to stress[GO:0006950]	ATP binding[GO:0005524] ; unfolded protein binding[GO:0051082]	NA	NA
TR35966|c2_g1_i4	48.9072	94.0556	0.943466	0.0470003	1.01981	No	MYB-related transcription factor	Salvia miltiorrhiza	NA	NA	NA	NA	NA
TR32131|c1_g2_i1	48.9072	94.0556	0.943466	0.0470003	1.01916	No	PREDICTED: KH domain-containing protein At4g18375	Sesamum indicum	NA	NA	NA	NA	NA
TR45701|c0_g1_i1	48.9072	94.0556	0.943466	0.0470003	1.01948	No	NA	NA	NA	NA	NA	NA	NA
TR38930|c0_g1_i6	109.552	210.603	0.942906	0.0167328	0.782848	No	PREDICTED: ABC transporter G family member 11-like, partial	Nicotiana tomentosiformis	NA	NA	NA	NA	NA
TR39734|c0_g1_i1	181.935	349.642	0.942454	0.0102413	0.667701	No	PREDICTED: probable anion transporter 6, chloroplastic isoform X1	Sesamum indicum	NA	NA	NA	NA	NA
TR32869|c1_g1_i1	60.645	116.547	0.942454	0.036427	0.962041	No	PREDICTED: probable serine/threonine-protein kinase WNK11	Sesamum indicum	NA	NA	NA	NA	NA
TR36073|c0_g1_i1	60.645	116.547	0.942454	0.036427	0.962411	No	PREDICTED: uncharacterized protein LOC104102573 isoform X2	Nicotiana tomentosiformis	NA	NA	NA	NA	NA
TR38832|c1_g6_i1	60.645	116.547	0.942454	0.036427	0.963153	No	hypothetical protein MIMGU_mgv1a012754mg	Mimulus guttatus	NA	NA	NA	NA	NA
TR8205|c1_g3_i1	60.645	116.547	0.942454	0.036427	0.962782	No	PREDICTED: two pore calcium channel protein 1B-like	Nelumbo nucifera	NA	NA	NA	NA	NA
TR42731|c1_g1_i4	72.3827	139.039	0.94177	0.0293535	0.923094	No	PREDICTED: kinesin-like protein KIF22	Sesamum indicum	NA	NA	NA	NA	NA
TR36180|c0_g5_i2	240.624	462.099	0.941425	0.00840456	0.615858	No	PREDICTED: thioredoxin reductase NTRC	Erythranthe guttatus	NA	NA	NA	NA	NA
TR27307|c1_g1_i3	84.1204	161.53	0.941277	0.0240748	0.857332	No	12-oxophytodienoate reductase 3, partial	Salvia miltiorrhiza	NA	oxidation-reduction process[GO:0055114]	oxidoreductase activity[GO:0016491] ; FMN binding[GO:0010181]	NA	NA
TR36417|c3_g1_i11	311.05	597.049	0.940702	0.00733692	0.592717	No	NA	NA	NA	NA	NA	NA	NA
TR40796|c0_g5_i5	131.071	251.497	0.940186	0.0140232	0.737583	No	NA	NA	NA	NA	NA	NA	NA
TR39049|c0_g14_i9	178.022	341.463	0.93967	0.0106608	0.677027	No	PREDICTED: xyloglucan endotransglucosylase/hydrolase protein 24-like isoform X1	Sesamum indicum	NA	NA	NA	NA	NA
TR3010|c0_g1_i1	189.76	363.954	0.939581	0.0101368	0.663406	No	PREDICTED: glycine-rich protein 2-like	Sesamum indicum	NA	NA	NA	NA	NA
TR37696|c2_g2_i1	504.723	967.137	0.93823	0.00673876	0.563648	No	PREDICTED: desumoylating isopeptidase 1-like	Sesamum indicum	NA	NA	NA	NA	NA
TR39705|c0_g1_i4	105.64	202.424	0.93823	0.0181195	0.798178	No	cytochrome P450 CYP74B21	Salvia miltiorrhiza	NA	oxidation-reduction process[GO:0055114]	heme binding[GO:0020037] ; oxidoreductase activity, acting on paired donors, with incorporation or reduction of molecular oxygen[GO:0016705] ; monooxygenase activity[GO:0004497] ; iron ion binding[GO:0005506]	NA	NA
TR28702|c0_g1_i1	58.6887	112.458	0.93823	0.0388826	0.973656	No	PREDICTED: uncharacterized protein LOC105166453	Sesamum indicum	NA	NA	NA	NA	NA
TR34503|c1_g4_i2	58.6887	112.458	0.93823	0.0388826	0.973301	No	NA	NA	NA	NA	NA	NA	NA
TR28265|c0_g1_i1	58.6887	112.458	0.93823	0.0388826	0.974011	No	hypothetical protein MIMGU_mgv1a006701mg	Mimulus guttatus	NA	NA	NA	integral component of membrane[GO:0016021]	NA
TR41641|c0_g10_i5	46.9509	89.9662	0.93823	0.0506641	1.05045	No	NA	NA	NA	NA	NA	NA	NA
TR26172|c0_g1_i1	35.2132	67.4747	0.93823	0.0677037	1.09364	No	PREDICTED: vacuole membrane protein KMS1-like	Sesamum indicum	NA	NA	NA	NA	NA
TR34780|c0_g4_i1	35.2132	67.4747	0.93823	0.0677037	1.09416	No	PREDICTED: zeatin O-glucosyltransferase-like	Sesamum indicum	NA	NA	NA	NA	NA
TR36597|c0_g2_i8	35.2132	67.4747	0.93823	0.0677037	1.09441	No	NA	NA	NA	NA	NA	NA	NA
TR42409|c0_g1_i3	35.2132	67.4747	0.93823	0.0677037	1.0939	No	NA	NA	NA	NA	NA	NA	NA
TR30319|c0_g1_i1	23.4755	44.9831	0.93823	0.093001	1.12857	No	PREDICTED: NAC transcription factor 29-like	Sesamum indicum	NA	NA	NA	NA	NA
TR30960|c0_g1_i4	23.4755	44.9831	0.93823	0.093001	1.12697	No	hypothetical protein MIMGU_mgv1a015271mg	Mimulus guttatus	NA	NA	NA	NA	NA
TR32666|c0_g4_i3	23.4755	44.9831	0.93823	0.093001	1.12897	No	PREDICTED: uncharacterized protein LOC105158209	Sesamum indicum	NA	NA	NA	NA	NA
TR33229|c0_g1_i1	23.4755	44.9831	0.93823	0.093001	1.12717	No	PREDICTED: probable strigolactone esterase D14 homolog	Sesamum indicum	NA	NA	NA	NA	NA
TR37972|c0_g2_i1	23.4755	44.9831	0.93823	0.093001	1.12877	No	hypothetical protein MIMGU_mgv1a021548mg, partial	Mimulus guttatus	NA	proteolysis[GO:0006508]	serine-type carboxypeptidase activity[GO:0004185]	NA	NA
TR43299|c0_g1_i1	23.4755	44.9831	0.93823	0.093001	1.12837	No	NA	NA	NA	NA	NA	NA	NA
TR32972|c0_g3_i4	23.4755	44.9831	0.93823	0.093001	1.12737	No	hypothetical protein MIMGU_mgv1a025792mg	Mimulus guttatus	NA	photosynthesis[GO:0015979]	calcium ion binding[GO:0005509]	integral component of membrane[GO:0016021] ; photosystem II oxygen evolving complex[GO:0009654] ; extrinsic component of membrane[GO:0019898]	NA
TR35139|c0_g1_i1	23.4755	44.9831	0.93823	0.093001	1.12677	No	unknown	Glycine max	NA	metabolic process[GO:0008152]	hydrolase activity[GO:0016787]	NA	NA
TR39202|c0_g2_i3	23.4755	44.9831	0.93823	0.093001	1.12917	No	NA	NA	NA	NA	NA	NA	NA
TR41075|c0_g2_i1	23.4755	44.9831	0.93823	0.093001	1.12757	No	PREDICTED: probable WRKY transcription factor 4 isoform X1	Sesamum indicum	NA	NA	NA	NA	NA
TR7820|c0_g5_i5	23.4755	44.9831	0.93823	0.093001	1.12777	No	NA	NA	NA	NA	NA	NA	NA
TR4023|c0_g2_i2	23.4755	44.9831	0.93823	0.093001	1.12797	No	PREDICTED: uncharacterized protein LOC105175988	Sesamum indicum	NA	NA	NA	NA	NA
TR42028|c0_g2_i3	23.4755	44.9831	0.93823	0.093001	1.12817	No	NA	NA	NA	NA	NA	NA	NA
TR21776|c0_g2_i1	11.7377	22.4916	0.93823	0.0933825	1.12701	No	PREDICTED: mitogen-activated protein kinase kinase kinase YODA-like	Sesamum indicum	NA	NA	NA	NA	NA
TR3592|c1_g4_i1	11.7377	22.4916	0.93823	0.0933825	1.12662	No	NA	NA	NA	NA	NA	NA	NA
TR40964|c0_g3_i1	11.7377	22.4916	0.93823	0.0933825	1.12642	No	PREDICTED: LOW QUALITY PROTEIN: mitogen-activated protein kinase kinase kinase YODA	Sesamum indicum	NA	NA	NA	NA	NA
TR41144|c0_g4_i1	11.7377	22.4916	0.93823	0.0933825	1.12543	No	PREDICTED: UPF0503 protein At3g09070, chloroplastic	Erythranthe guttatus	NA	NA	NA	NA	NA
TR41562|c0_g5_i1	11.7377	22.4916	0.93823	0.0933825	1.12682	No	hypothetical protein MIMGU_mgv1a004280mg	Mimulus guttatus	NA	NA	NA	NA	NA
TR42767|c0_g1_i1	11.7377	22.4916	0.93823	0.0933825	1.12821	No	hypothetical protein MIMGU_mgv1a004270mg	Mimulus guttatus	NA	NA	NA	integral component of membrane[GO:0016021]	NA
TR2297|c0_g1_i1	11.7377	22.4916	0.93823	0.0933825	1.12801	No	NA	NA	NA	NA	NA	NA	NA
TR30246|c0_g2_i1	11.7377	22.4916	0.93823	0.0933825	1.12622	No	PREDICTED: transcription factor bHLH150	Sesamum indicum	NA	NA	NA	NA	NA
TR32714|c1_g2_i1	11.7377	22.4916	0.93823	0.0933825	1.12583	No	NA	NA	NA	NA	NA	NA	NA
TR3318|c0_g5_i1	11.7377	22.4916	0.93823	0.0933825	1.12385	No	PREDICTED: KH domain-containing protein At4g18375-like	Sesamum indicum	NA	NA	NA	NA	NA
TR34720|c0_g2_i1	11.7377	22.4916	0.93823	0.0933825	1.12523	No	NA	NA	NA	NA	NA	NA	NA
TR37026|c1_g1_i1	11.7377	22.4916	0.93823	0.0933825	1.12504	No	PREDICTED: lysophospholipid acyltransferase LPEAT1-like isoform X1	Sesamum indicum	NA	NA	NA	NA	NA
TR37474|c1_g5_i1	11.7377	22.4916	0.93823	0.0933825	1.12464	No	Casein kinase II subunit alpha-2	Theobroma cacao	NA	NA	NA	NA	NA
TR38073|c1_g1_i1	11.7377	22.4916	0.93823	0.0933825	1.12484	No	PREDICTED: 3-ketoacyl-CoA synthase 1	Sesamum indicum	NA	NA	NA	NA	NA
TR40911|c4_g4_i1	11.7377	22.4916	0.93823	0.0933825	1.12405	No	hypothetical protein L484_006172	Morus notabilis	NA	NA	NA	NA	NA
TR41268|c2_g6_i1	11.7377	22.4916	0.93823	0.0933825	1.12444	No	PREDICTED: uncharacterized protein LOC105164092	Sesamum indicum	NA	NA	NA	NA	NA
TR41454|c0_g1_i1	11.7377	22.4916	0.93823	0.0933825	1.12563	No	unnamed protein product	Coffea canephora	NA	regulation of transcription, DNA-templated[GO:0006355] ; multicellular organismal development[GO:0007275] ; transcription, DNA-templated[GO:0006351]	DNA binding[GO:0003677] ; transcription factor activity, sequence-specific DNA binding[GO:0003700]	nucleus[GO:0005634]	NA
TR42430|c0_g2_i3	11.7377	22.4916	0.93823	0.0933825	1.12741	No	PREDICTED: beta-(1,2)-xylosyltransferase, partial	Sesamum indicum	NA	NA	NA	NA	NA
TR34045|c0_g4_i5	11.7377	22.4916	0.93823	0.0933825	1.12761	No	PREDICTED: protein EXORDIUM-like	Sesamum indicum	NA	NA	NA	NA	NA
TR38172|c2_g5_i4	11.7377	22.4916	0.93823	0.0933825	1.12781	No	NA	NA	NA	NA	NA	NA	NA
TR42325|c0_g2_i2	11.7377	22.4916	0.93823	0.0933825	1.12721	No	PREDICTED: uncharacterized protein LOC105165801 isoform X2	Sesamum indicum	NA	NA	NA	NA	NA
TR42840|c0_g2_i5	11.7377	22.4916	0.93823	0.0933825	1.12602	No	hypothetical protein MIMGU_mgv1a003315mg	Mimulus guttatus	NA	NA	NA	NA	NA
TR43444|c2_g3_i5	11.7377	22.4916	0.93823	0.0933825	1.12425	No	PREDICTED: putative receptor-like protein kinase At3g47110	Sesamum indicum	NA	NA	NA	NA	NA
TR35235|c0_g1_i1	221.061	423.25	0.937069	0.00923425	0.632085	No	PREDICTED: basic leucine zipper 61-like	Sesamum indicum	NA	NA	NA	NA	NA
TR37131|c0_g3_i1	972.276	1860.67	0.936381	0.00863622	0.620894	No	glyceraldehyde-3-phosphate dehydrogenase, partial	Mesostigma viride	NA	glucose metabolic process[GO:0006006] ; oxidation-reduction process[GO:0055114]	NAD binding[GO:0051287] ; oxidoreductase activity, acting on the aldehyde or oxo group of donors, NAD or NADP as acceptor[GO:0016620] ; NADP binding[GO:0050661]	NA	NA
TR35827|c0_g2_i1	266.055	509.127	0.9363	0.00825064	0.61045	No	aminocyclopropan-1-carboxylate oxidase	Plantago major	NA	oxidation-reduction process[GO:0055114]	metal ion binding[GO:0046872] ; oxidoreductase activity[GO:0016491]	NA	NA
TR38225|c0_g1_i5	127.159	243.318	0.936211	0.0149017	0.757084	No	NA	NA	NA	NA	NA	NA	NA
TR25718|c0_g1_i3	127.159	243.318	0.936211	0.0149017	0.757645	No	hypothetical protein MIMGU_mgv1a001196mg	Mimulus guttatus	NA	metabolic process[GO:0008152]	catalytic activity[GO:0003824]	NA	NA
TR28224|c0_g3_i1	91.9456	175.843	0.935436	0.0221958	0.857174	No	hypothetical protein MIMGU_mgv1a013702mg	Mimulus guttatus	NA	NA	NA	NA	NA
TR36328|c1_g1_i1	80.2079	153.352	0.935027	0.0267757	0.885898	No	PREDICTED: protein disulfide isomerase-like 2-3	Sesamum indicum	NA	NA	NA	NA	NA
TR29335|c0_g2_i8	68.4701	130.86	0.934478	0.0329582	0.943449	No	PREDICTED: heat shock 70 kDa protein 17	Sesamum indicum	NA	NA	NA	NA	NA
TR8208|c1_g2_i1	907.718	1733.89	0.9337	0.00845396	0.616842	No	PREDICTED: membrane protein of ER body-like protein	Sesamum indicum	NA	NA	NA	NA	NA
TR37650|c2_g1_i14	56.7324	108.368	0.9337	0.0415965	0.992339	No	hypothetical protein B456_006G095700, partial	Gossypium raimondii	NA	NA	NA	NA	NA
TR38691|c0_g2_i1	56.7324	108.368	0.9337	0.0415965	0.992685	No	vacuolar invertase CvINV	Elsholtzia haichowensis	NA	carbohydrate metabolic process[GO:0005975]	sucrose alpha-glucosidase activity[GO:0004575]	integral component of membrane[GO:0016021]	map00500:Starch and sucrose metabolism(alpha-glucosidase[ec:3.2.1.48]) ; map00500:Starch and sucrose metabolism(invertase[ec:3.2.1.26]) ; map00052:Galactose metabolism(invertase[ec:3.2.1.26])
TR34967|c0_g1_i2	305.181	582.736	0.933176	0.00789171	0.610224	No	NA	NA	NA	NA	NA	NA	NA
TR40483|c0_g2_i4	146.722	280.122	0.932974	0.0132947	0.719118	No	PREDICTED: arogenate dehydratase/prephenate dehydratase 6, chloroplastic-like	Sesamum indicum	NA	NA	NA	NA	NA
TR21261|c0_g1_i1	134.984	257.631	0.932516	0.0144387	0.745153	No	PREDICTED: clustered mitochondria protein	Erythranthe guttatus	NA	NA	NA	NA	NA
TR29844|c0_g1_i10	44.9947	85.8769	0.932516	0.0547265	1.06332	No	PREDICTED: uncharacterized protein LOC102578241	Solanum tuberosum	NA	NA	NA	NA	NA
TR36056|c0_g1_i8	44.9947	85.8769	0.932516	0.0547265	1.06392	No	PREDICTED: DNA-directed RNA polymerase V subunit 7-like	Sesamum indicum	NA	NA	NA	NA	NA
TR39957|c2_g1_i6	44.9947	85.8769	0.932516	0.0547265	1.06362	No	PREDICTED: uncharacterized protein LOC105164663 isoform X1	Sesamum indicum	NA	NA	NA	NA	NA
TR43081|c1_g2_i1	44.9947	85.8769	0.932516	0.0547265	1.06513	No	PREDICTED: sucrose nonfermenting 4-like protein	Sesamum indicum	NA	NA	NA	NA	NA
TR8045|c1_g2_i1	44.9947	85.8769	0.932516	0.0547265	1.06423	No	NA	NA	NA	NA	NA	NA	NA
TR39435|c1_g3_i2	44.9947	85.8769	0.932516	0.0547265	1.06453	No	PREDICTED: uncharacterized protein LOC105168902	Sesamum indicum	NA	NA	NA	NA	NA
TR43466|c0_g3_i2	44.9947	85.8769	0.932516	0.0547265	1.06483	No	NA	NA	NA	NA	NA	NA	NA
TR7657|c0_g2_i6	168.241	321.016	0.932117	0.0118654	0.696759	No	PREDICTED: uncharacterized protein At5g01610-like	Sesamum indicum	NA	NA	NA	NA	NA
TR43771|c1_g2_i4	78.2516	149.262	0.931657	0.0282876	0.907467	No	NA	NA	NA	NA	NA	NA	NA
TR8208|c1_g2_i3	178.022	339.418	0.931005	0.0114268	0.686879	No	PREDICTED: membrane protein of ER body-like protein isoform X3	Erythranthe guttatus	NA	NA	NA	NA	NA
TR41229|c1_g1_i3	99.7708	190.156	0.930494	0.0206151	0.834175	No	PREDICTED: LOW QUALITY PROTEIN: protein transport protein SEC31 homolog B-like	Sesamum indicum	NA	NA	NA	NA	NA
TR33481|c0_g1_i3	133.028	253.541	0.930494	0.0148724	0.757278	No	PREDICTED: basic leucine zipper 61-like	Sesamum indicum	NA	NA	NA	NA	NA
TR3036|c1_g2_i3	66.5138	126.771	0.930494	0.0349746	0.949269	No	NA	NA	NA	NA	NA	NA	NA
TR35989|c0_g2_i5	66.5138	126.771	0.930494	0.0349746	0.949645	No	NA	NA	NA	NA	NA	NA	NA
TR31817|c1_g11_i1	33.2569	63.3853	0.930494	0.0739867	1.11774	No	hypothetical protein L484_014502	Morus notabilis	NA	NA	NA	NA	NA
TR36096|c0_g3_i8	33.2569	63.3853	0.930494	0.0739867	1.11749	No	PREDICTED: IAA-amino acid hydrolase ILR1-like 2	Sesamum indicum	NA	NA	NA	NA	NA
TR32208|c1_g6_i1	33.2569	63.3853	0.930494	0.0739867	1.11724	No	NA	NA	NA	NA	NA	NA	NA
TR38133|c1_g1_i6	33.2569	63.3853	0.930494	0.0739867	1.11798	No	PREDICTED: RING finger and CHY zinc finger domain-containing protein 1-like	Sesamum indicum	NA	NA	NA	NA	NA
TR38204|c1_g5_i10	33.2569	63.3853	0.930494	0.0739867	1.117	No	PREDICTED: ethylene-responsive transcription factor-like protein At4g13040 isoform X5	Sesamum indicum	NA	NA	NA	NA	NA
TR35073|c1_g1_i2	154.547	294.435	0.929905	0.0129902	0.720256	No	PREDICTED: probable cinnamyl alcohol dehydrogenase 6	Sesamum indicum	NA	NA	NA	NA	NA
TR21441|c0_g1_i2	88.033	167.664	0.929459	0.0245231	0.860341	No	hypothetical protein MIMGU_mgv1a015271mg	Mimulus guttatus	NA	NA	NA	NA	NA
TR39787|c0_g1_i4	6717.9	12791.6	0.929111	0.0748139	1.11331	No	PREDICTED: polyphenol oxidase I, chloroplastic-like	Sesamum indicum	NA	NA	NA	NA	NA
TR34959|c0_g1_i3	164.328	312.837	0.928831	0.0124209	0.709338	No	PREDICTED: probable mitochondrial chaperone bcs1	Nicotiana sylvestris	NA	NA	NA	NA	NA
TR34197|c0_g1_i2	54.7761	104.279	0.928831	0.0445995	0.991554	No	PREDICTED: zerumbone synthase isoform X1	Sesamum indicum	NA	NA	NA	NA	NA
TR42757|c2_g7_i4	76.2953	145.173	0.928105	0.0299192	0.930222	No	PREDICTED: protein TRANSPARENT TESTA 12-like	Erythranthe guttatus	NA	NA	NA	NA	NA
TR38466|c1_g2_i4	119.334	226.96	0.927439	0.016991	0.78847	No	PREDICTED: aspartic proteinase-like protein 2 isoform X1	Sesamum indicum	NA	NA	NA	NA	NA
TR36417|c3_g1_i15	260.186	494.814	0.927341	0.0090112	0.626827	No	NA	NA	NA	NA	NA	NA	NA
TR2666|c2_g1_i4	107.596	204.469	0.926257	0.0193135	0.825332	No	PREDICTED: zinc finger protein ZAT10-like	Sesamum indicum	NA	NA	NA	NA	NA
TR27040|c0_g1_i2	64.5575	122.681	0.926257	0.0371847	0.96241	No	PREDICTED: monothiol glutaredoxin-S4-like	Sesamum indicum	NA	NA	NA	NA	NA
TR30402|c0_g1_i2	64.5575	122.681	0.926257	0.0371847	0.962047	No	hypothetical protein M569_16468	Genlisea aurea	NA	NA	DNA binding[GO:0003677]	NA	NA
TR3499|c1_g1_i1	43.0384	81.7875	0.926257	0.0592352	1.06467	No	NA	NA	NA	NA	NA	NA	NA
TR42169|c0_g2_i6	43.0384	81.7875	0.926257	0.0592352	1.06439	No	PREDICTED: MLO-like protein 1 isoform X3	Sesamum indicum	NA	NA	NA	NA	NA
TR32720|c0_g8_i2	21.5192	40.8937	0.926257	0.100673	1.13566	No	NA	NA	NA	NA	NA	NA	NA
TR37909|c0_g2_i1	21.5192	40.8937	0.926257	0.100673	1.13641	No	NA	NA	NA	NA	NA	NA	NA
TR38890|c0_g9_i1	21.5192	40.8937	0.926257	0.100673	1.13904	No	PREDICTED: myb family transcription factor APL isoform X4	Sesamum indicum	NA	NA	NA	NA	NA
TR40215|c0_g16_i1	21.5192	40.8937	0.926257	0.100673	1.1351	No	PREDICTED: probable polygalacturonase	Sesamum indicum	NA	NA	NA	NA	NA
TR42250|c0_g3_i1	21.5192	40.8937	0.926257	0.100673	1.13529	No	NA	NA	NA	NA	NA	NA	NA
TR44342|c0_g1_i4	21.5192	40.8937	0.926257	0.100673	1.13716	No	PREDICTED: uncharacterized protein LOC105956308	Erythranthe guttatus	NA	NA	NA	NA	NA
TR8201|c0_g3_i1	21.5192	40.8937	0.926257	0.100673	1.13753	No	NA	NA	NA	NA	NA	NA	NA
TR8209|c1_g1_i1	21.5192	40.8937	0.926257	0.100673	1.13885	No	PREDICTED: splicing factor U2af large subunit A-like isoform X1	Sesamum indicum	NA	NA	NA	NA	NA
TR23492|c0_g1_i1	21.5192	40.8937	0.926257	0.100673	1.13866	No	NA	NA	NA	NA	NA	NA	NA
TR27683|c0_g1_i4	21.5192	40.8937	0.926257	0.100673	1.13847	No	PREDICTED: serine/threonine-protein kinase tricorner-like	Sesamum indicum	NA	NA	NA	NA	NA
TR28957|c0_g1_i1	21.5192	40.8937	0.926257	0.100673	1.13791	No	PREDICTED: indole-3-acetic acid-induced protein ARG2-like	Nicotiana tomentosiformis	NA	NA	NA	NA	NA
TR31026|c0_g1_i3	21.5192	40.8937	0.926257	0.100673	1.13735	No	PREDICTED: TBC1 domain family member 5 homolog A-like	Sesamum indicum	NA	NA	NA	NA	NA
TR31820|c0_g9_i1	21.5192	40.8937	0.926257	0.100673	1.13697	No	hypothetical protein MIMGU_mgv1a013286mg	Mimulus guttatus	NA	protein folding[GO:0006457] ; protein peptidyl-prolyl isomerization[GO:0000413]	peptidyl-prolyl cis-trans isomerase activity[GO:0003755]	integral component of membrane[GO:0016021]	NA
TR33448|c1_g1_i3	21.5192	40.8937	0.926257	0.100673	1.1366	No	PREDICTED: rRNA-processing protein EFG1-like isoform X2	Sesamum indicum	NA	NA	NA	NA	NA
TR38175|c1_g4_i5	21.5192	40.8937	0.926257	0.100673	1.13772	No	PREDICTED: uncharacterized protein LOC105156886	Sesamum indicum	NA	NA	NA	NA	NA
TR39964|c0_g4_i3	21.5192	40.8937	0.926257	0.100673	1.13622	No	PREDICTED: nudix hydrolase 8-like isoform X3	Sesamum indicum	NA	NA	NA	NA	NA
TR40077|c0_g1_i3	21.5192	40.8937	0.926257	0.100673	1.13604	No	hypothetical protein MIMGU_mgv1a014925mg	Mimulus guttatus	NA	Mo-molybdopterin cofactor biosynthetic process[GO:0006777]	molybdopterin synthase activity[GO:0030366]	cytosol[GO:0005829] ; molybdopterin synthase complex[GO:0019008]	map00790:Folate biosynthesis(synthase[ec:2.8.1.12])
TR41653|c1_g1_i8	21.5192	40.8937	0.926257	0.100673	1.13585	No	cytochrome P450 CYP721A38	Salvia miltiorrhiza	NA	NA	metal ion binding[GO:0046872] ; oxidoreductase activity[GO:0016491]	NA	NA
TR42640|c0_g2_i6	21.5192	40.8937	0.926257	0.100673	1.13679	No	NA	NA	NA	NA	NA	NA	NA
TR42700|c0_g3_i2	21.5192	40.8937	0.926257	0.100673	1.13492	No	PREDICTED: pentatricopeptide repeat-containing protein At3g53700, chloroplastic	Sesamum indicum	NA	NA	NA	NA	NA
TR42985|c0_g2_i4	21.5192	40.8937	0.926257	0.100673	1.13473	No	PREDICTED: amidophosphoribosyltransferase, chloroplastic	Sesamum indicum	NA	NA	NA	NA	NA
TR44252|c0_g3_i1	21.5192	40.8937	0.926257	0.100673	1.13454	No	hypothetical protein M569_14809, partial	Genlisea aurea	NA	oxidation-reduction process[GO:0055114]	amino acid binding[GO:0016597] ; oxidoreductase activity[GO:0016491] ; NADP binding[GO:0050661]	NA	NA
TR44588|c1_g1_i1	21.5192	40.8937	0.926257	0.100673	1.13436	No	hypothetical protein MIMGU_mgv1a018669mg	Mimulus guttatus	NA	protein phosphorylation[GO:0006468]	protein kinase activity[GO:0004672] ; ATP binding[GO:0005524]	integral component of membrane[GO:0016021]	NA
TR44609|c8_g7_i1	21.5192	40.8937	0.926257	0.100673	1.13548	No	NA	NA	NA	NA	NA	NA	NA
TR8352|c0_g2_i1	21.5192	40.8937	0.926257	0.100673	1.13828	No	PREDICTED: U4/U6.U5 tri-snRNP-associated protein 2-like	Sesamum indicum	NA	NA	NA	NA	NA
TR28895|c0_g2_i2	21.5192	40.8937	0.926257	0.100673	1.1381	No	hypothetical protein JCGZ_02588	Jatropha curcas	NA	NA	NA	NA	NA
TR44835|c2_g1_i1	117.377	222.871	0.925054	0.0176049	0.787648	No	hypothetical protein MIMGU_mgv1a000074mg	Mimulus guttatus	NA	NA	NA	NA	NA
TR36313|c1_g1_i4	575.149	1091.86	0.924784	0.00763609	0.605476	No	NA	NA	NA	NA	NA	NA	NA
TR3024|c0_g1_i1	287.575	545.932	0.924784	0.00871862	0.617115	No	PREDICTED: 1-aminocyclopropane-1-carboxylate oxidase 5-like	Sesamum indicum	NA	NA	NA	NA	NA
TR41730|c0_g4_i3	170.197	323.061	0.924598	0.0124703	0.706862	No	PREDICTED: uncharacterized protein LOC105166786 isoform X1	Sesamum indicum	NA	NA	NA	NA	NA
TR28550|c2_g3_i7	74.339	141.083	0.924358	0.0316806	0.932564	No	hypothetical protein MIMGU_mgv1a012878mg	Mimulus guttatus	NA	methylation[GO:0032259]	O-methyltransferase activity[GO:0008171]	NA	NA
TR40593|c0_g6_i3	74.339	141.083	0.924358	0.0316806	0.932164	No	PREDICTED: isoflavone 2'-hydroxylase-like isoform X2	Sesamum indicum	NA	NA	NA	NA	NA
TR34225|c0_g1_i8	52.8198	100.19	0.923583	0.0479269	1.02917	No	hypothetical protein JCGZ_09570	Jatropha curcas	NA	NA	NA	NA	NA
TR31284|c0_g1_i1	271.924	515.261	0.922099	0.00918306	0.630469	No	PREDICTED: clustered mitochondria protein	Sesamum indicum	NA	NA	NA	NA	NA
TR41855|c0_g2_i3	62.6013	118.592	0.921742	0.0396233	0.977218	No	NA	NA	NA	NA	NA	NA	NA
TR20877|c0_g1_i1	62.6013	118.592	0.921742	0.0396233	0.976867	No	NA	NA	NA	NA	NA	NA	NA
TR19890|c0_g1_i4	31.3006	59.2959	0.921742	0.0812608	1.12663	No	70 kDa heat shock protein	Solanum nigrum	NA	NA	NA	NA	NA
TR22799|c0_g1_i1	31.3006	59.2959	0.921742	0.0812608	1.12572	No	hypothetical protein MIMGU_mgv1a000140mg	Mimulus guttatus	NA	NA	NA	NA	NA
TR31910|c1_g1_i5	31.3006	59.2959	0.921742	0.0812608	1.12617	No	hypothetical protein MIMGU_mgv1a012336mg	Mimulus guttatus	NA	plant-type cell wall organization[GO:0009664]	NA	extracellular region[GO:0005576] ; cell wall[GO:0005618] ; membrane[GO:0016020]	NA
TR35567|c0_g5_i1	31.3006	59.2959	0.921742	0.0812608	1.12595	No	PREDICTED: uncharacterized protein LOC105163284	Sesamum indicum	NA	NA	NA	NA	NA
TR39542|c0_g10_i4	31.3006	59.2959	0.921742	0.0812608	1.12527	No	PREDICTED: uncharacterized protein LOC105164936	Sesamum indicum	NA	NA	NA	NA	NA
TR44430|c1_g1_i2	31.3006	59.2959	0.921742	0.0812608	1.12549	No	PREDICTED: LOW QUALITY PROTEIN: ubiquitin carboxyl-terminal hydrolase 2-like	Sesamum indicum	NA	NA	NA	NA	NA
TR32456|c2_g3_i4	31.3006	59.2959	0.921742	0.0812608	1.12686	No	hypothetical protein MIMGU_mgv1a014849mg	Mimulus guttatus	NA	NA	NA	NA	NA
TR42756|c0_g1_i2	31.3006	59.2959	0.921742	0.0812608	1.1264	No	unnamed protein product	Coffea canephora	NA	phosphorylation[GO:0016310] ; NADP biosynthetic process[GO:0006741] ; NAD metabolic process[GO:0019674]	NAD+ kinase activity[GO:0003951]	NA	map00760:Nicotinate and nicotinamide metabolism(kinase[ec:2.7.1.23])
TR36680|c0_g6_i4	72.3827	136.994	0.920396	0.0335824	0.939362	No	MYB-related protein	Rehmannia glutinosa	NA	regulation of transcription, DNA-templated[GO:0006355] ; transcription, DNA-templated[GO:0006351]	DNA binding[GO:0003677]	nucleus[GO:0005634]	NA
TR41507|c1_g2_i2	82.1641	155.396	0.919371	0.0287476	0.915798	No	PREDICTED: 3-ketoacyl-CoA synthase 11-like	Solanum lycopersicum	NA	fatty acid biosynthetic process[GO:0006633]	transferase activity, transferring acyl groups other than amino-acyl groups[GO:0016747]	integral component of membrane[GO:0016021]	NA
TR2724|c0_g1_i1	82.1641	155.396	0.919371	0.0287476	0.916224	No	hypothetical protein MIMGU_mgv1a0234681mg, partial	Mimulus guttatus	NA	NA	NA	NA	NA
TR28863|c0_g1_i1	41.0821	77.6981	0.919371	0.0642438	1.07733	No	PREDICTED: uncharacterized protein LOC105977656 isoform X1	Erythranthe guttatus	NA	NA	NA	NA	NA
TR33876|c0_g1_i1	41.0821	77.6981	0.919371	0.0642438	1.07681	No	hypothetical protein MIMGU_mgv1a002660mg	Mimulus guttatus	NA	peptidyl-arginine N-methylation[GO:0035246]	methyltransferase activity[GO:0008168]	NA	NA
TR23540|c0_g1_i2	41.0821	77.6981	0.919371	0.0642438	1.07654	No	PREDICTED: MADS-box transcription factor 23	Sesamum indicum	NA	NA	NA	NA	NA
TR40747|c1_g2_i1	41.0821	77.6981	0.919371	0.0642438	1.07707	No	NA	NA	NA	NA	NA	NA	NA
TR32032|c1_g1_i7	461.684	873.082	0.91921	0.00794107	0.608552	No	NA	NA	NA	NA	NA	NA	NA
TR36073|c0_g4_i1	234.755	443.697	0.918421	0.0103384	0.668942	No	hypothetical protein MIMGU_mgv1a012999mg	Mimulus guttatus	NA	oxidation-reduction process[GO:0055114]	protein disulfide oxidoreductase activity[GO:0015035]	NA	NA
TR33175|c0_g3_i2	50.8635	96.1003	0.91791	0.0516188	1.05025	No	FKBP-like peptidyl-prolyl cis-trans isomerase family protein isoform 2	Theobroma cacao	NA	protein peptidyl-prolyl isomerization[GO:0000413] ; protein folding[GO:0006457] ; cellular response to water deprivation[GO:0042631]	peptidyl-prolyl cis-trans isomerase activity[GO:0003755]	chloroplast thylakoid membrane[GO:0009535]	NA
TR39579|c2_g3_i2	50.8635	96.1003	0.91791	0.0516188	1.04993	No	hypothetical protein MIMGU_mgv1a010108mg	Mimulus guttatus	NA	protein phosphorylation[GO:0006468]	protein kinase activity[GO:0004672] ; ATP binding[GO:0005524]	NA	NA
TR2876|c1_g2_i6	50.8635	96.1003	0.91791	0.0516188	1.05087	No	PREDICTED: indole-3-acetate O-methyltransferase 1-like isoform X1	Glycine max	NA	NA	NA	NA	NA
TR38075|c0_g2_i2	50.8635	96.1003	0.91791	0.0516188	1.05056	No	NA	NA	NA	NA	NA	NA	NA
TR44777|c0_g2_i4	50.8635	96.1003	0.91791	0.0516188	1.05118	No	PREDICTED: uncharacterized protein LOC105157864 isoform X2	Sesamum indicum	NA	NA	NA	NA	NA
TR31772|c1_g1_i3	1105.3	2087.63	0.917421	0.0108921	0.673629	No	hypothetical protein MIMGU_mgv1a006675mg	Mimulus guttatus	NA	NA	NA	NA	NA
TR30025|c0_g1_i2	223.017	421.206	0.917371	0.0107901	0.676471	No	PREDICTED: pectinesterase-like, partial	Sesamum indicum	NA	NA	NA	NA	NA
TR7657|c0_g1_i1	111.508	210.603	0.917371	0.0197316	0.832307	No	PREDICTED: uncharacterized protein At5g01610-like	Sesamum indicum	NA	NA	NA	NA	NA
TR40395|c1_g1_i2	111.508	210.603	0.917371	0.0197316	0.83282	No	NA	NA	NA	NA	NA	NA	NA
TR36680|c0_g6_i8	60.645	114.502	0.916919	0.0423177	0.991611	No	MYB-related protein	Rehmannia glutinosa	NA	regulation of transcription, DNA-templated[GO:0006355] ; transcription, DNA-templated[GO:0006351]	DNA binding[GO:0003677]	nucleus[GO:0005634]	NA
TR39281|c3_g4_i1	60.645	114.502	0.916919	0.0423177	0.991273	No	hypothetical protein MIMGU_mgv1a009359mg	Mimulus guttatus	NA	mRNA splice site selection[GO:0006376]	mRNA binding[GO:0003729]	U1 snRNP[GO:0005685]	NA
TR2707|c0_g3_i1	60.645	114.502	0.916919	0.0423177	0.99195	No	hypothetical protein MIMGU_mgv1a021608mg, partial	Mimulus guttatus	NA	pseudouridine synthesis[GO:0001522] ; tRNA processing[GO:0008033]	RNA binding[GO:0003723] ; pseudouridine synthase activity[GO:0009982]	NA	NA
TR36919|c0_g1_i1	60.645	114.502	0.916919	0.0423177	0.992289	No	unnamed protein product	Coffea canephora	NA	NA	NA	NA	NA
TR43064|c0_g1_i2	70.4264	132.905	0.916203	0.0356364	0.955137	No	PREDICTED: putative aconitate hydratase, cytoplasmic	Sesamum indicum	NA	NA	NA	NA	NA
TR23257|c0_g1_i1	150.634	284.212	0.915915	0.0148013	0.75534	No	PREDICTED: LOW QUALITY PROTEIN: glutamine synthetase, chloroplastic-like	Erythranthe guttatus	NA	NA	NA	NA	NA
TR21441|c0_g1_i1	80.2079	151.307	0.915662	0.0303862	0.935413	No	hypothetical protein MIMGU_mgv1a015271mg	Mimulus guttatus	NA	NA	NA	NA	NA
TR34142|c0_g12_i1	119.334	224.916	0.914383	0.0186977	0.809097	No	PREDICTED: major allergen Pru ar 1-like	Sesamum indicum	NA	NA	NA	NA	NA
TR38930|c0_g1_i5	487.116	918.065	0.91433	0.0082519	0.609885	No	PREDICTED: ABC transporter G family member 11-like, partial	Nicotiana sylvestris	NA	NA	NA	NA	NA
TR42297|c2_g6_i1	138.897	261.72	0.914013	0.0161595	0.780517	No	PREDICTED: transketolase, chloroplastic-like	Musa acuminata subsp. malaccensis	NA	NA	NA	NA	NA
TR39035|c0_g1_i3	285.618	537.753	0.912855	0.00966677	0.649378	No	endopeptidase 1	Plantago major	NA	proteolysis[GO:0006508]	peptidase activity[GO:0008233]	NA	NA
TR28616|c0_g1_i4	303.225	570.468	0.911757	0.00948051	0.641895	No	uncharacterized protein LOC100819568	Glycine max	NA	protein folding[GO:0006457] ; response to stress[GO:0006950]	ATP binding[GO:0005524] ; unfolded protein binding[GO:0051082]	NA	NA
TR26775|c0_g1_i7	234.755	441.652	0.911757	0.0109177	0.673997	No	PREDICTED: uncharacterized protein LOC101256982	Solanum lycopersicum	NA	NA	NA	NA	NA
TR29620|c0_g1_i2	68.4701	128.815	0.911757	0.0378552	0.963405	No	hypothetical protein MIMGU_mgv1a011809mg	Mimulus guttatus	NA	NA	NA	NA	NA
TR40012|c0_g3_i3	68.4701	128.815	0.911757	0.0378552	0.963763	No	NA	NA	NA	NA	NA	NA	NA
TR4046|c0_g4_i1	58.6887	110.413	0.911757	0.045299	0.996768	No	fatty acid desaturase-like protein 1, partial	Perilla frutescens var. frutescens	NA	oxidation-reduction process[GO:0055114] ; lipid metabolic process[GO:0006629]	oxidoreductase activity, acting on paired donors, with oxidation of a pair of donors resulting in the reduction of molecular oxygen to two molecules of water[GO:0016717]	integral component of membrane[GO:0016021]	NA
TR42397|c0_g1_i3	58.6887	110.413	0.911757	0.045299	0.995809	No	PREDICTED: MACPF domain-containing protein NSL1	Sesamum indicum	NA	NA	NA	NA	NA
TR24216|c1_g2_i2	58.6887	110.413	0.911757	0.045299	0.99549	No	PREDICTED: monocopper oxidase-like protein SKU5	Sesamum indicum	NA	NA	NA	NA	NA
TR17735|c1_g1_i1	58.6887	110.413	0.911757	0.045299	0.996128	No	hypothetical protein VITISV_017741	Vitis vinifera	NA	NA	binding[GO:0005488]	NA	NA
TR42527|c0_g1_i1	58.6887	110.413	0.911757	0.045299	0.996448	No	PREDICTED: non-lysosomal glucosylceramidase isoform X4	Sesamum indicum	NA	NA	NA	NA	NA
TR37034|c0_g1_i2	48.9072	92.0109	0.911757	0.0557208	1.06159	No	PREDICTED: gibberellin 3-beta-dioxygenase 1-like	Sesamum indicum	NA	NA	NA	NA	NA
TR27640|c0_g2_i1	39.1258	73.6087	0.911757	0.0698127	1.10176	No	PREDICTED: probable folate-biopterin transporter 2	Sesamum indicum	NA	NA	NA	NA	NA
TR32512|c0_g2_i3	39.1258	73.6087	0.911757	0.0698127	1.10277	No	PREDICTED: eukaryotic translation initiation factor 3 subunit L-like	Sesamum indicum	NA	NA	NA	NA	NA
TR42250|c0_g2_i4	39.1258	73.6087	0.911757	0.0698127	1.10252	No	monogalactosyldiacylglycerol synthase 1 type A	Sesamum indicum	NA	glycolipid biosynthetic process[GO:0009247]	transferase activity, transferring hexosyl groups[GO:0016758]	NA	NA
TR37864|c0_g2_i1	39.1258	73.6087	0.911757	0.0698127	1.10328	No	PREDICTED: probable mitochondrial import inner membrane translocase subunit TIM21	Sesamum indicum	NA	NA	NA	NA	NA
TR39049|c0_g14_i8	39.1258	73.6087	0.911757	0.0698127	1.10303	No	xyloglucan endo-1 family protein	Populus trichocarpa	NA	cell wall organization[GO:0071555] ; xyloglucan metabolic process[GO:0010411] ; cell wall biogenesis[GO:0042546]	xyloglucan:xyloglucosyl transferase activity[GO:0016762] ; hydrolase activity, hydrolyzing O-glycosyl compounds[GO:0004553]	cell wall[GO:0005618] ; apoplast[GO:0048046]	NA
TR42074|c0_g2_i6	39.1258	73.6087	0.911757	0.0698127	1.10201	No	hypothetical protein MIMGU_mgv1a007887mg	Mimulus guttatus	NA	NA	NA	NA	NA
TR32603|c0_g2_i1	39.1258	73.6087	0.911757	0.0698127	1.10227	No	NA	NA	NA	NA	NA	NA	NA
TR28648|c0_g1_i2	29.3443	55.2066	0.911757	0.0895886	1.13474	No	PREDICTED: probable protein phosphatase 2C 12	Sesamum indicum	NA	NA	NA	NA	NA
TR37022|c0_g2_i4	29.3443	55.2066	0.911757	0.0895886	1.13516	No	PREDICTED: peptide chain release factor PrfB3, chloroplastic	Erythranthe guttatus	NA	NA	NA	NA	NA
TR41447|c3_g1_i8	29.3443	55.2066	0.911757	0.0895886	1.13411	No	NA	NA	NA	NA	NA	NA	NA
TR42831|c1_g1_i4	29.3443	55.2066	0.911757	0.0895886	1.13307	No	NA	NA	NA	NA	NA	NA	NA
TR43722|c1_g1_i1	29.3443	55.2066	0.911757	0.0895886	1.1339	No	hypothetical protein MIMGU_mgv1a000548mg	Mimulus guttatus	NA	Golgi to plasma membrane transport[GO:0006893]	NA	exocyst[GO:0000145]	NA
TR44176|c2_g1_i2	29.3443	55.2066	0.911757	0.0895886	1.13537	No	PREDICTED: receptor-like protein kinase THESEUS 1	Sesamum indicum	NA	NA	NA	NA	NA
TR33487|c0_g2_i1	29.3443	55.2066	0.911757	0.0895886	1.13453	No	PREDICTED: uncharacterized protein LOC105965398	Erythranthe guttatus	NA	NA	NA	NA	NA
TR33998|c2_g1_i1	29.3443	55.2066	0.911757	0.0895886	1.13348	No	NA	NA	NA	NA	NA	NA	NA
TR37477|c1_g4_i1	29.3443	55.2066	0.911757	0.0895886	1.13327	No	NA	NA	NA	NA	NA	NA	NA
TR37954|c0_g1_i2	29.3443	55.2066	0.911757	0.0895886	1.13432	No	hypothetical protein MIMGU_mgv1a008836mg	Mimulus guttatus	NA	protein transport[GO:0015031]	protein transporter activity[GO:0008565]	integral component of membrane[GO:0016021]	NA
TR41285|c0_g7_i1	29.3443	55.2066	0.911757	0.0895886	1.13495	No	NA	NA	NA	NA	NA	NA	NA
TR43734|c0_g2_i3	29.3443	55.2066	0.911757	0.0895886	1.13369	No	NA	NA	NA	NA	NA	NA	NA
TR19385|c0_g1_i1	19.5629	36.8044	0.911757	0.107662	1.15469	No	PREDICTED: K(+) efflux antiporter 2, chloroplastic	Sesamum indicum	NA	NA	NA	NA	NA
TR22599|c0_g2_i1	19.5629	36.8044	0.911757	0.107662	1.15451	No	PREDICTED: LOW QUALITY PROTEIN: regulatory-associated protein of TOR 1	Sesamum indicum	NA	NA	NA	NA	NA
TR28599|c1_g2_i2	19.5629	36.8044	0.911757	0.107662	1.15433	No	PREDICTED: villin-2-like	Sesamum indicum	NA	NA	NA	NA	NA
TR32426|c0_g2_i4	19.5629	36.8044	0.911757	0.107662	1.15415	No	PREDICTED: uncharacterized protein LOC105178871	Sesamum indicum	NA	NA	NA	NA	NA
TR36888|c0_g2_i1	19.5629	36.8044	0.911757	0.107662	1.15361	No	PREDICTED: probable dolichyl-diphosphooligosaccharide--protein glycosyltransferase subunit 3B	Sesamum indicum	NA	NA	NA	NA	NA
TR39560|c0_g2_i3	19.5629	36.8044	0.911757	0.107662	1.15253	No	PREDICTED: F-box/kelch-repeat protein At3g61590-like	Sesamum indicum	NA	NA	NA	NA	NA
TR39570|c0_g1_i1	19.5629	36.8044	0.911757	0.107662	1.15217	No	hypothetical protein MIMGU_mgv1a003604mg	Mimulus guttatus	NA	NA	NA	NA	NA
TR43103|c0_g1_i1	19.5629	36.8044	0.911757	0.107662	1.15271	No	PREDICTED: dihydrolipoyllysine-residue acetyltransferase component 1 of pyruvate dehydrogenase complex, mitochondrial	Sesamum indicum	NA	NA	NA	NA	NA
TR43179|c2_g4_i1	19.5629	36.8044	0.911757	0.107662	1.15289	No	PREDICTED: protein TOPLESS	Sesamum indicum	NA	NA	NA	NA	NA
TR43808|c1_g1_i1	19.5629	36.8044	0.911757	0.107662	1.15307	No	PREDICTED: eukaryotic translation initiation factor 3 subunit A	Sesamum indicum	NA	NA	NA	NA	NA
TR44298|c1_g4_i1	19.5629	36.8044	0.911757	0.107662	1.15325	No	PREDICTED: transcription factor GTE8	Sesamum indicum	NA	NA	NA	NA	NA
TR21732|c0_g1_i3	19.5629	36.8044	0.911757	0.107662	1.15343	No	NA	NA	NA	NA	NA	NA	NA
TR21883|c0_g1_i2	19.5629	36.8044	0.911757	0.107662	1.15379	No	PREDICTED: uncharacterized protein LOC105167226	Sesamum indicum	NA	NA	NA	NA	NA
TR27538|c0_g3_i10	19.5629	36.8044	0.911757	0.107662	1.15235	No	hypothetical protein CISIN_1g008012mg	Citrus sinensis	NA	NA	NA	NA	NA
TR36107|c0_g1_i3	19.5629	36.8044	0.911757	0.107662	1.15397	No	NA	NA	NA	NA	NA	NA	NA
TR37129|c0_g3_i2	19.5629	36.8044	0.911757	0.107662	1.15487	No	PREDICTED: probable E3 ubiquitin-protein ligase LUL4 isoform X1	Sesamum indicum	NA	NA	NA	NA	NA
TR38921|c2_g2_i1	19.5629	36.8044	0.911757	0.107662	1.15505	No	NA	NA	NA	NA	NA	NA	NA
TR40308|c1_g8_i1	19.5629	36.8044	0.911757	0.107662	1.15632	No	hypothetical protein MIMGU_mgv1a005340mg	Mimulus guttatus	NA	cell morphogenesis[GO:0000902] ; cytoskeleton organization[GO:0007010]	actin binding[GO:0003779]	NA	NA
TR40700|c1_g3_i2	19.5629	36.8044	0.911757	0.107662	1.15523	No	PREDICTED: mitochondrial carrier protein MTM1 isoform X2	Cucumis melo	NA	NA	NA	NA	NA
TR40877|c0_g11_i1	19.5629	36.8044	0.911757	0.107662	1.15541	No	PREDICTED: THO complex subunit 1	Sesamum indicum	NA	NA	NA	NA	NA
TR41648|c1_g2_i1	19.5629	36.8044	0.911757	0.107662	1.15559	No	PREDICTED: uncharacterized protein LOC105174183	Sesamum indicum	NA	NA	NA	NA	NA
TR7982|c0_g3_i1	19.5629	36.8044	0.911757	0.107662	1.15577	No	NA	NA	NA	NA	NA	NA	NA
TR37696|c2_g2_i7	19.5629	36.8044	0.911757	0.107662	1.15596	No	NA	NA	NA	NA	NA	NA	NA
TR44020|c4_g14_i4	19.5629	36.8044	0.911757	0.107662	1.15614	No	PREDICTED: paired amphipathic helix protein Sin3-like 2 isoform X3	Fragaria vesca subsp. vesca	NA	NA	NA	NA	NA
TR28619|c0_g2_i1	9.78145	18.4022	0.911757	0.148983	1.17492	No	NA	NA	NA	NA	NA	NA	NA
TR38113|c1_g7_i1	9.78145	18.4022	0.911757	0.148983	1.17425	No	PREDICTED: putative quinone-oxidoreductase homolog, chloroplastic	Sesamum indicum	NA	NA	NA	NA	NA
TR42728|c1_g8_i2	9.78145	18.4022	0.911757	0.148983	1.17465	No	hypothetical protein MIMGU_mgv1a003487mg	Mimulus guttatus	NA	signal transduction[GO:0007165] ; phototropism[GO:0009638]	signal transducer activity[GO:0004871]	NA	NA
TR44739|c0_g1_i1	9.78145	18.4022	0.911757	0.148983	1.17411	No	NA	NA	NA	NA	NA	NA	NA
TR40164|c0_g5_i1	9.78145	18.4022	0.911757	0.148983	1.17384	No	PREDICTED: bifunctional protein FolD 2	Sesamum indicum	NA	NA	NA	NA	NA
TR42223|c0_g4_i1	9.78145	18.4022	0.911757	0.148983	1.17519	No	NA	NA	NA	NA	NA	NA	NA
TR43012|c2_g2_i1	9.78145	18.4022	0.911757	0.148983	1.17506	No	PREDICTED: probable E3 ubiquitin ligase SUD1	Musa acuminata subsp. malaccensis	NA	NA	NA	NA	NA
TR44460|c0_g2_i1	9.78145	18.4022	0.911757	0.148983	1.17398	No	NA	NA	NA	NA	NA	NA	NA
TR2760|c0_g1_i1	9.78145	18.4022	0.911757	0.148983	1.17479	No	NA	NA	NA	NA	NA	NA	NA
TR31424|c0_g3_i1	9.78145	18.4022	0.911757	0.148983	1.17546	No	PREDICTED: equilibrative nucleotide transporter 3-like isoform X2	Sesamum indicum	NA	NA	NA	NA	NA
TR36425|c0_g1_i3	9.78145	18.4022	0.911757	0.148983	1.17438	No	PREDICTED: serine/threonine-protein kinase D6PKL2	Sesamum indicum	NA	NA	NA	NA	NA
TR42693|c0_g8_i1	9.78145	18.4022	0.911757	0.148983	1.17533	No	APS reductase	Nicotiana attenuata	NA	sulfate reduction[GO:0019419] ; cell redox homeostasis[GO:0045454]	oxidoreductase activity, acting on a sulfur group of donors, disulfide as acceptor[GO:0016671]	cell[GO:0005623]	NA
TR8940|c0_g1_i1	9.78145	18.4022	0.911757	0.148983	1.17452	No	NA	NA	NA	NA	NA	NA	NA
TR27630|c0_g1_i1	183.891	345.552	0.910051	0.0131508	0.718703	No	hypothetical protein SOVF_189280, partial	Spinacia oleracea	NA	NA	NA	NA	NA
TR42649|c2_g7_i1	375.608	705.417	0.909251	0.00895569	0.625503	No	NA	NA	NA	NA	NA	NA	NA
TR44016|c1_g2_i2	105.64	198.335	0.908786	0.0223718	0.854826	No	PREDICTED: E3 ubiquitin-protein ligase UPL7	Sesamum indicum	NA	NA	NA	NA	NA
TR38090|c0_g1_i2	95.8582	179.932	0.908482	0.0253085	0.871839	No	PREDICTED: uncharacterized protein C4orf29 homolog	Sesamum indicum	NA	NA	NA	NA	NA
TR39527|c3_g1_i8	95.8582	179.932	0.908482	0.0253085	0.871402	No	PREDICTED: phosphate transporter PHO1 homolog 9-like	Sesamum indicum	NA	NA	NA	NA	NA
TR41778|c0_g1_i8	95.8582	179.932	0.908482	0.0253085	0.870964	No	NA	NA	NA	NA	NA	NA	NA
TR25236|c0_g1_i2	258.23	484.591	0.90811	0.0106144	0.675333	No	PREDICTED: peptidyl-prolyl cis-trans isomerase FKBP62	Sesamum indicum	NA	NA	NA	NA	NA
TR41472|c2_g2_i4	172.153	323.061	0.90811	0.0140557	0.737031	No	hypothetical protein MIMGU_mgv1a001297mg	Mimulus guttatus	NA	NA	NA	integral component of membrane[GO:0016021]	NA
TR26627|c0_g1_i2	86.0767	161.53	0.90811	0.0291416	0.921926	No	hypothetical protein MIMGU_mgv1a017224mg	Mimulus guttatus	NA	NA	NA	integral component of membrane[GO:0016021]	NA
TR35406|c0_g7_i1	86.0767	161.53	0.90811	0.0291416	0.922351	No	PREDICTED: E3 ubiquitin-protein ligase RHA1B-like	Sesamum indicum	NA	NA	NA	NA	NA
TR44820|c0_g1_i1	2222.34	4169.12	0.90766	0.0219597	0.853342	No	PREDICTED: uncharacterized protein LOC105177096 isoform X4	Sesamum indicum	NA	NA	NA	NA	NA
TR38832|c1_g1_i2	76.2953	143.128	0.907641	0.0340711	0.937734	No	PREDICTED: protein STAY-GREEN LIKE, chloroplastic	Sesamum indicum	NA	NA	NA	NA	NA
TR44215|c1_g8_i3	189.76	355.776	0.906791	0.0131771	0.717854	No	PREDICTED: probable galactinol--sucrose galactosyltransferase 2	Sesamum indicum	NA	NA	NA	NA	NA
TR36417|c3_g1_i9	283.662	531.619	0.906219	0.010249	0.666934	No	NA	NA	NA	NA	NA	NA	NA
TR43668|c0_g1_i7	113.465	212.647	0.906219	0.0209566	0.835185	No	PREDICTED: probable alpha,alpha-trehalose-phosphate synthase [UDP-forming] 10	Sesamum indicum	NA	NA	NA	NA	NA
TR43988|c0_g3_i1	56.7324	106.324	0.906219	0.0486026	1.03654	No	PREDICTED: uncharacterized protein LOC105160040 isoform X1	Sesamum indicum	NA	NA	NA	NA	NA
TR42762|c1_g1_i5	103.683	194.245	0.905696	0.0233888	0.858761	No	PREDICTED: probable receptor-like protein kinase At1g67000	Nicotiana sylvestris	NA	NA	NA	NA	NA
TR34353|c2_g1_i4	197.585	370.088	0.905395	0.0129345	0.720665	No	PREDICTED: 20 kDa chaperonin, chloroplastic-like	Solanum tuberosum	NA	protein folding[GO:0006457]	NA	cytoplasm[GO:0005737]	NA
TR2558|c2_g3_i1	187.804	351.686	0.905063	0.013461	0.720726	No	NA	NA	NA	NA	NA	NA	NA
TR34956|c2_g1_i1	46.9509	87.9216	0.905063	0.0602849	1.06183	No	PREDICTED: mitogen-activated protein kinase 15-like	Sesamum indicum	NA	NA	NA	NA	NA
TR35950|c0_g11_i1	46.9509	87.9216	0.905063	0.0602849	1.06156	No	PREDICTED: glutathione S-transferase T1-like	Sesamum indicum	NA	NA	NA	NA	NA
TR38190|c0_g1_i1	46.9509	87.9216	0.905063	0.0602849	1.06101	No	NA	NA	NA	NA	NA	NA	NA
TR40316|c0_g2_i9	46.9509	87.9216	0.905063	0.0602849	1.06128	No	NA	NA	NA	NA	NA	NA	NA
TR35353|c0_g1_i1	346.263	648.166	0.904494	0.00955495	0.644391	No	putative beta-14-mannan synthase, partial	Elaeis guineensis	NA	NA	NA	integral component of membrane[GO:0016021]	NA
TR41392|c0_g3_i1	84.1204	157.441	0.904282	0.0307758	0.933164	No	PREDICTED: basic 7S globulin	Sesamum indicum	NA	NA	NA	NA	NA
TR35734|c0_g6_i1	84.1204	157.441	0.904282	0.0307758	0.933577	No	NA	NA	NA	NA	NA	NA	NA
TR3131|c0_g1_i5	148.678	278.077	0.903296	0.0164761	0.779344	No	PREDICTED: tropinone reductase homolog isoform X1	Sesamum indicum	NA	NA	NA	NA	NA
TR24555|c0_g1_i1	37.1695	69.5194	0.903296	0.0760144	1.11402	No	PREDICTED: E3 ubiquitin-protein ligase UPL2-like	Sesamum indicum	NA	NA	NA	NA	NA
TR30805|c0_g1_i4	37.1695	69.5194	0.903296	0.0760144	1.11378	No	hypothetical protein M569_13156, partial	Genlisea aurea	NA	protein ubiquitination[GO:0016567]	zinc ion binding[GO:0008270] ; ubiquitin-protein transferase activity[GO:0004842]	NA	NA
TR29764|c0_g4_i2	37.1695	69.5194	0.903296	0.0760144	1.11307	No	hypothetical protein CICLE_v10022863mg	Citrus clementina	NA	NA	NA	NA	NA
TR39862|c0_g2_i1	37.1695	69.5194	0.903296	0.0760144	1.11354	No	PREDICTED: translation initiation factor IF-2, chloroplastic isoform X1	Sesamum indicum	NA	NA	NA	NA	NA
TR975|c0_g2_i1	37.1695	69.5194	0.903296	0.0760144	1.1133	No	PREDICTED: LOW QUALITY PROTEIN: uncharacterized protein LOC105173535	Sesamum indicum	NA	NA	NA	NA	NA
TR38512|c0_g1_i12	101.727	190.156	0.90248	0.0244839	0.860287	No	PREDICTED: serine carboxypeptidase-like 20	Sesamum indicum	NA	NA	NA	NA	NA
TR7910|c0_g2_i3	3100.72	5794.64	0.902118	0.0328726	0.941785	No	hypothetical protein MIMGU_mgv1a005535mg	Mimulus guttatus	NA	biosynthetic process[GO:0009058]	pyridoxal phosphate binding[GO:0030170] ; catalytic activity[GO:0003824]	NA	NA
TR33584|c0_g1_i2	64.5575	120.637	0.90201	0.0429167	1.0012	No	AP2/EREBP Transcription Factors	Salvia miltiorrhiza	NA	regulation of transcription, DNA-templated[GO:0006355] ; multicellular organismal development[GO:0007275] ; transcription, DNA-templated[GO:0006351]	DNA binding[GO:0003677] ; transcription factor activity, sequence-specific DNA binding[GO:0003700]	nucleus[GO:0005634]	NA
TR39923|c1_g1_i3	64.5575	120.637	0.90201	0.0429167	1.00154	No	PREDICTED: uncharacterized protein LOC105157763	Sesamum indicum	NA	NA	NA	NA	NA
TR39668|c1_g3_i4	91.9456	171.754	0.901489	0.0279849	0.90155	No	PREDICTED: alpha-xylosidase 1	Sesamum indicum	NA	NA	NA	NA	NA
TR43912|c2_g4_i2	82.1641	153.352	0.900262	0.0325425	0.93939	No	PREDICTED: translation initiation factor IF-2, chloroplastic	Nicotiana sylvestris	NA	NA	NA	NA	NA
TR25043|c1_g1_i1	54.7761	102.234	0.900262	0.0522687	1.05161	No	PREDICTED: kinesin-related protein 11-like isoform X3	Sesamum indicum	NA	NA	NA	NA	NA
TR42636|c1_g1_i3	54.7761	102.234	0.900262	0.0522687	1.05223	No	PREDICTED: sterol 3-beta-glucosyltransferase UGT80B1	Sesamum indicum	NA	NA	NA	NA	NA
TR42284|c0_g2_i3	54.7761	102.234	0.900262	0.0522687	1.05192	No	PREDICTED: uncharacterized protein LOC105166424	Sesamum indicum	NA	NA	NA	NA	NA
TR18322|c0_g2_i1	27.388	51.1172	0.900262	0.0989898	1.1363	No	PREDICTED: agamous-like MADS-box protein AGL8 homolog	Erythranthe guttatus	NA	NA	NA	NA	NA
TR25782|c0_g1_i3	27.388	51.1172	0.900262	0.0989898	1.13706	No	NA	NA	NA	NA	NA	NA	NA
TR29321|c0_g1_i1	27.388	51.1172	0.900262	0.0989898	1.13687	No	NA	NA	NA	NA	NA	NA	NA
TR3420|c2_g1_i1	27.388	51.1172	0.900262	0.0989898	1.13668	No	PREDICTED: probable methionine--tRNA ligase	Sesamum indicum	NA	NA	NA	NA	NA
TR28265|c0_g1_i2	27.388	51.1172	0.900262	0.0989898	1.13783	No	PREDICTED: vacuole membrane protein KMS1-like	Sesamum indicum	NA	NA	NA	NA	NA
TR3291|c0_g3_i11	27.388	51.1172	0.900262	0.0989898	1.13726	No	NA	NA	NA	NA	NA	NA	NA
TR33931|c0_g5_i1	27.388	51.1172	0.900262	0.0989898	1.13649	No	NA	NA	NA	NA	NA	NA	NA
TR42914|c0_g4_i5	27.388	51.1172	0.900262	0.0989898	1.13745	No	PREDICTED: GATA transcription factor 11-like	Sesamum indicum	NA	NA	NA	NA	NA
TR44215|c1_g8_i9	27.388	51.1172	0.900262	0.0989898	1.13764	No	PREDICTED: probable galactinol--sucrose galactosyltransferase 2	Sesamum indicum	NA	NA	NA	NA	NA
TR36180|c0_g3_i5	199.542	372.133	0.89913	0.0134953	0.721435	No	NA	NA	NA	NA	NA	NA	NA
TR2265|c0_g4_i1	134.984	251.497	0.897751	0.0187233	0.809696	No	PREDICTED: putative G3BP-like protein	Sesamum indicum	NA	NA	NA	NA	NA
TR36385|c0_g5_i5	89.9893	167.664	0.897751	0.029485	0.922155	No	PREDICTED: uncharacterized membrane protein At4g09580	Sesamum indicum	NA	NA	NA	NA	NA
TR40195|c1_g9_i1	89.9893	167.664	0.897751	0.029485	0.922576	No	PREDICTED: uncharacterized protein LOC105163737	Sesamum indicum	NA	NA	NA	NA	NA
TR32283|c0_g1_i3	44.9947	83.8322	0.897751	0.0653708	1.08404	No	PREDICTED: tether containing UBX domain for GLUT4	Sesamum indicum	NA	NA	NA	NA	NA
TR33698|c0_g1_i3	44.9947	83.8322	0.897751	0.0653708	1.0843	No	PREDICTED: zinc finger CCCH domain-containing protein 44-like isoform X1	Sesamum indicum	NA	NA	NA	NA	NA
TR38951|c0_g5_i4	44.9947	83.8322	0.897751	0.0653708	1.08378	No	PREDICTED: F-box/kelch-repeat protein SKIP25-like	Sesamum indicum	NA	NA	NA	NA	NA
TR35589|c0_g2_i6	44.9947	83.8322	0.897751	0.0653708	1.08456	No	hypothetical protein MIMGU_mgv1a011685mg	Mimulus guttatus	NA	NA	NA	NA	NA
TR39049|c0_g16_i1	44.9947	83.8322	0.897751	0.0653708	1.08483	No	PREDICTED: brassinosteroid-regulated protein BRU1-like	Nicotiana sylvestris	NA	NA	NA	NA	NA
TR28544|c0_g2_i1	152.591	284.212	0.897299	0.0168565	0.785954	No	NA	NA	NA	NA	NA	NA	NA
TR36987|c0_g1_i4	80.2079	149.262	0.896033	0.0344535	0.941085	No	PREDICTED: uncharacterized protein LOC105173804	Sesamum indicum	NA	NA	NA	NA	NA
TR34658|c4_g1_i1	498.854	928.288	0.895956	0.00961345	0.647063	No	PREDICTED: putative late blight resistance protein homolog R1A-10	Erythranthe guttatus	NA	NA	NA	NA	NA
TR38240|c0_g2_i7	115.421	214.692	0.895363	0.0222214	0.857198	No	PREDICTED: glycerol-3-phosphate dehydrogenase [NAD(+)]	Sesamum indicum	NA	NA	NA	NA	NA
TR38392|c0_g6_i2	115.421	214.692	0.895363	0.0222214	0.857681	No	PREDICTED: uncharacterized protein LOC105156865 isoform X1	Sesamum indicum	NA	NA	NA	NA	NA
TR37644|c0_g5_i1	133.028	247.407	0.895161	0.0193412	0.824973	No	GCST_FLAANRecName: Full=Aminomethyltransferase, mitochondrial; AltName: Full=Glycine cleavage system T protein; Short=GCVT; Flags: Precursor	Flaveria anomala	NA	glycine catabolic process[GO:0006546] ; methylation[GO:0032259]	aminomethyltransferase activity[GO:0004047] ; transaminase activity[GO:0008483]	mitochondrion[GO:0005739]	map00260:Glycine, serine and threonine metabolism(S-aminomethyldihydrolipoylprotein:(6S)-tetrahydrofolate aminomethyltransferase (ammonia-forming)[ec:2.1.2.10]) ; map00670:One carbon pool by folate(S-aminomethyldihydrolipoylprotein:(6S)-tetrahydrofolate aminomethyltransferase (ammonia-forming)[ec:2.1.2.10])
TR42436|c0_g1_i1	281.706	523.44	0.893836	0.0113866	0.685663	No	NA	NA	NA	NA	NA	NA	NA
TR38512|c0_g1_i16	88.033	163.575	0.893836	0.0311058	0.935316	No	PREDICTED: serine carboxypeptidase-like 20	Sesamum indicum	NA	NA	NA	NA	NA
TR40183|c2_g1_i6	52.8198	98.145	0.893836	0.0563438	1.06694	No	PREDICTED: mitochondrial carrier protein MTM1	Erythranthe guttatus	NA	NA	NA	NA	NA
TR39250|c0_g2_i1	35.2132	65.43	0.893836	0.083173	1.12273	No	PREDICTED: uncharacterized protein LOC105171867	Sesamum indicum	NA	NA	NA	NA	NA
TR44108|c3_g1_i3	35.2132	65.43	0.893836	0.083173	1.12339	No	NA	NA	NA	NA	NA	NA	NA
TR29810|c0_g1_i1	35.2132	65.43	0.893836	0.083173	1.12295	No	hypothetical protein MIMGU_mgv1a0101012mg, partial	Mimulus guttatus	NA	polysaccharide catabolic process[GO:0000272]	beta-amylase activity[GO:0016161]	NA	map00500:Starch and sucrose metabolism(saccharogen amylase[ec:3.2.1.2])
TR30280|c1_g2_i4	35.2132	65.43	0.893836	0.083173	1.12251	No	PREDICTED: uncharacterized protein LOC105163702	Sesamum indicum	NA	NA	NA	NA	NA
TR31239|c0_g3_i2	35.2132	65.43	0.893836	0.083173	1.12361	No	NA	NA	NA	NA	NA	NA	NA
TR37818|c1_g6_i1	35.2132	65.43	0.893836	0.083173	1.12163	No	hypothetical protein MIMGU_mgv1a011492mg	Mimulus guttatus	NA	NA	NA	NA	NA
TR44026|c0_g7_i5	35.2132	65.43	0.893836	0.083173	1.12317	No	PREDICTED: centromere/kinetochore protein zw10 homolog isoform X2	Sesamum indicum	NA	NA	NA	NA	NA
TR44269|c0_g3_i3	35.2132	65.43	0.893836	0.083173	1.12207	No	PREDICTED: subtilisin-like protease	Sesamum indicum	NA	NA	NA	NA	NA
TR14864|c0_g1_i1	35.2132	65.43	0.893836	0.083173	1.12229	No	nucleotide-binding site leucine-rich repeat protein, partial	Rhododendron hyperythrum	NA	NA	NA	NA	NA
TR27317|c0_g1_i1	35.2132	65.43	0.893836	0.083173	1.12185	No	PREDICTED: uncharacterized protein LOC105176035	Sesamum indicum	NA	NA	NA	NA	NA
TR23099|c0_g1_i1	17.6066	32.715	0.893836	0.114226	1.16169	No	PREDICTED: uncharacterized protein LOC104099048	Nicotiana tomentosiformis	NA	NA	NA	NA	NA
TR32731|c0_g1_i1	17.6066	32.715	0.893836	0.114226	1.16186	No	PREDICTED: uncharacterized protein At2g34460, chloroplastic	Sesamum indicum	NA	NA	NA	NA	NA
TR35041|c0_g2_i1	17.6066	32.715	0.893836	0.114226	1.16238	No	NA	NA	NA	NA	NA	NA	NA
TR38224|c0_g4_i1	17.6066	32.715	0.893836	0.114226	1.16272	No	PREDICTED: uncharacterized protein LOC101263255 isoform 1	Solanum lycopersicum	NA	NA	NA	NA	NA
TR40296|c0_g4_i3	17.6066	32.715	0.893836	0.114226	1.1598	No	NA	NA	NA	NA	NA	NA	NA
TR40665|c2_g4_i1	17.6066	32.715	0.893836	0.114226	1.16307	No	PREDICTED: agamous-like MADS-box protein AGL21 isoform X3	Sesamum indicum	NA	NA	NA	NA	NA
TR41563|c0_g2_i5	17.6066	32.715	0.893836	0.114226	1.16324	No	PREDICTED: uncharacterized protein LOC105156912	Sesamum indicum	NA	NA	NA	NA	NA
TR42727|c0_g6_i5	17.6066	32.715	0.893836	0.114226	1.15962	No	BnaC05g07330D	Brassica napus	NA	proteolysis[GO:0006508]	cysteine-type peptidase activity[GO:0008234]	NA	NA
TR8209|c1_g3_i2	17.6066	32.715	0.893836	0.114226	1.16393	No	PREDICTED: splicing factor U2af large subunit A-like isoform X1	Sesamum indicum	NA	NA	NA	NA	NA
TR10427|c0_g3_i1	17.6066	32.715	0.893836	0.114226	1.1648	No	NA	NA	NA	NA	NA	NA	NA
TR18109|c0_g2_i1	17.6066	32.715	0.893836	0.114226	1.16497	No	NA	NA	NA	NA	NA	NA	NA
TR24584|c0_g1_i2	17.6066	32.715	0.893836	0.114226	1.16549	No	PREDICTED: probable leucine-rich repeat receptor-like protein kinase At5g49770 isoform X2	Sesamum indicum	NA	NA	NA	NA	NA
TR2755|c1_g2_i6	17.6066	32.715	0.893836	0.114226	1.16566	No	PREDICTED: MADS-box protein SOC1-like isoform X2	Sesamum indicum	NA	NA	NA	NA	NA
TR30275|c0_g9_i8	17.6066	32.715	0.893836	0.114226	1.16462	No	NA	NA	NA	NA	NA	NA	NA
TR31232|c2_g1_i1	17.6066	32.715	0.893836	0.114226	1.16445	No	NA	NA	NA	NA	NA	NA	NA
TR31647|c0_g2_i3	17.6066	32.715	0.893836	0.114226	1.16428	No	PREDICTED: transcription factor MYB1R1-like	Musa acuminata subsp. malaccensis	NA	NA	NA	NA	NA
TR31797|c0_g3_i1	17.6066	32.715	0.893836	0.114226	1.16203	No	PREDICTED: uncharacterized protein LOC105157619	Sesamum indicum	NA	NA	NA	NA	NA
TR32202|c0_g1_i5	17.6066	32.715	0.893836	0.114226	1.161	No	NA	NA	NA	NA	NA	NA	NA
TR32226|c0_g1_i1	17.6066	32.715	0.893836	0.114226	1.16117	No	NA	NA	NA	NA	NA	NA	NA
TR35915|c0_g3_i1	17.6066	32.715	0.893836	0.114226	1.16031	No	PREDICTED: uncharacterized protein LOC105125555	Populus euphratica	NA	NA	NA	NA	NA
TR35968|c1_g1_i3	17.6066	32.715	0.893836	0.114226	1.16601	No	PREDICTED: zinc finger CCCH domain-containing protein 14-like	Sesamum indicum	NA	NA	NA	NA	NA
TR36776|c0_g3_i2	17.6066	32.715	0.893836	0.114226	1.16584	No	NA	NA	NA	NA	NA	NA	NA
TR37162|c0_g8_i2	17.6066	32.715	0.893836	0.114226	1.16532	No	PREDICTED: thaumatin-like protein 1	Sesamum indicum	NA	NA	NA	NA	NA
TR38071|c0_g4_i1	17.6066	32.715	0.893836	0.114226	1.16514	No	PREDICTED: F-box protein SKIP31-like	Sesamum indicum	NA	NA	NA	NA	NA
TR39023|c1_g4_i1	17.6066	32.715	0.893836	0.114226	1.1641	No	PREDICTED: cardiolipin synthase, mitochondrial isoform X3	Sesamum indicum	NA	NA	NA	NA	NA
TR39611|c0_g6_i1	17.6066	32.715	0.893836	0.114226	1.16376	No	PREDICTED: sufE-like protein, chloroplastic	Sesamum indicum	NA	NA	NA	NA	NA
TR40059|c1_g13_i14	17.6066	32.715	0.893836	0.114226	1.16341	No	NA	NA	NA	NA	NA	NA	NA
TR40233|c0_g1_i1	17.6066	32.715	0.893836	0.114226	1.16255	No	PREDICTED: armadillo repeat-containing protein 6	Sesamum indicum	NA	NA	NA	NA	NA
TR42757|c2_g9_i3	17.6066	32.715	0.893836	0.114226	1.16134	No	NA	NA	NA	NA	NA	NA	NA
TR43084|c0_g3_i1	17.6066	32.715	0.893836	0.114226	1.16083	No	ISPE_MENPIRecName: Full=4-diphosphocytidyl-2-C-methyl-D-erythritol kinase, chloroplastic; AltName: Full=4-(cytidine-5'-diphospho)-2-C-methyl-D-erythritol kinase; Short=CMK; Flags: Precursor	Mentha piperita	Lamiaceae	isopentenyl diphosphate biosynthetic process, methylerythritol 4-phosphate pathway[GO:0019288] ; terpenoid biosynthetic process[GO:0016114] ; phosphorylation[GO:0016310]	ATP binding[GO:0005524] ; 4-(cytidine 5'-diphospho)-2-C-methyl-D-erythritol kinase activity[GO:0050515]	chloroplast[GO:0009507]	map01130:Biosynthesis of antibiotics(5'-diphospho)-2-C-methyl-D-erythritol kinase[ec:2.7.1.148]) ; map00900:Terpenoid backbone biosynthesis(5'-diphospho)-2-C-methyl-D-erythritol kinase[ec:2.7.1.148])
TR43461|c0_g5_i1	17.6066	32.715	0.893836	0.114226	1.16065	No	NA	NA	NA	NA	NA	NA	NA
TR43769|c0_g1_i1	17.6066	32.715	0.893836	0.114226	1.15945	No	PREDICTED: uncharacterized protein LOC105165931 isoform X2	Sesamum indicum	NA	NA	NA	NA	NA
TR2283|c0_g4_i1	17.6066	32.715	0.893836	0.114226	1.16014	No	hypothetical protein SOVF_101560, partial	Spinacia oleracea	NA	NA	NA	NA	NA
TR28116|c0_g1_i1	17.6066	32.715	0.893836	0.114226	1.15997	No	PREDICTED: uncharacterized N-acetyltransferase ycf52	Sesamum indicum	NA	NA	NA	NA	NA
TR31485|c3_g1_i6	17.6066	32.715	0.893836	0.114226	1.16289	No	NA	NA	NA	NA	NA	NA	NA
TR33985|c0_g2_i3	17.6066	32.715	0.893836	0.114226	1.16048	No	PREDICTED: vesicle transport protein SFT2B	Sesamum indicum	NA	NA	NA	NA	NA
TR39816|c0_g1_i5	17.6066	32.715	0.893836	0.114226	1.16152	No	hypothetical protein MIMGU_mgv1a008083mg	Mimulus guttatus	NA	NA	NA	NA	NA
TR42160|c1_g3_i1	17.6066	32.715	0.893836	0.114226	1.16359	No	PREDICTED: probable 28S rRNA (cytosine-C(5))-methyltransferase isoform X2	Fragaria vesca subsp. vesca	NA	NA	NA	NA	NA
TR43035|c1_g4_i1	17.6066	32.715	0.893836	0.114226	1.1622	No	PREDICTED: uncharacterized protein LOC105170398	Sesamum indicum	NA	NA	NA	NA	NA
TR33321|c4_g1_i5	299.312	556.155	0.893836	0.0110617	0.678004	No	PREDICTED: flavanone 3-dioxygenase-like	Sesamum indicum	NA	NA	NA	NA	NA
TR28209|c0_g1_i1	113.465	210.603	0.89228	0.0231407	0.862114	No	PREDICTED: synaptotagmin-3	Sesamum indicum	NA	NA	NA	NA	NA
TR38884|c0_g1_i2	113.465	210.603	0.89228	0.0231407	0.861646	No	PREDICTED: CBL-interacting serine/threonine-protein kinase 1-like	Sesamum indicum	NA	NA	NA	NA	NA
TR32874|c0_g5_i2	113.465	210.603	0.89228	0.0231407	0.862583	No	NA	NA	NA	NA	NA	NA	NA
TR2768|c1_g2_i3	209.323	388.491	0.892149	0.0137922	0.72991	No	PREDICTED: heat shock cognate 70 kDa protein 2	Sesamum indicum	NA	NA	NA	NA	NA
TR33839|c1_g3_i2	1029.01	1909.74	0.89212	0.0125569	0.708837	No	polyphenol oxidase	Sesamum indicum	NA	pigment biosynthetic process[GO:0046148] ; oxidation-reduction process[GO:0055114]	metal ion binding[GO:0046872] ; catechol oxidase activity[GO:0004097]	NA	map00350:Tyrosine metabolism(oxidase[ec:1.10.3.1]) ; map00950:Isoquinoline alkaloid biosynthesis(oxidase[ec:1.10.3.1])
TR44448|c1_g6_i2	217.148	402.803	0.891397	0.013536	0.723047	No	PREDICTED: uncharacterized aarF domain-containing protein kinase At4g31390, chloroplastic	Sesamum indicum	NA	NA	NA	NA	NA
TR41086|c0_g1_i1	181.935	337.373	0.890924	0.0153867	0.765838	No	PREDICTED: probable serine/threonine-protein kinase At1g18390	Sesamum indicum	NA	NA	NA	NA	NA
TR2699|c1_g9_i1	60.645	112.458	0.890924	0.0491004	1.03524	No	NA	NA	NA	NA	NA	NA	NA
TR39527|c3_g1_i4	60.645	112.458	0.890924	0.0491004	1.03493	No	PREDICTED: phosphate transporter PHO1 homolog 9-like	Sesamum indicum	NA	NA	NA	NA	NA
TR39787|c0_g1_i2	51170.7	94812.2	0.889755	0.499428	1.139	No	PREDICTED: polyphenol oxidase I, chloroplastic-like	Sesamum indicum	NA	NA	NA	NA	NA
TR43009|c2_g3_i1	172.153	318.971	0.889731	0.0161922	0.7799	No	PREDICTED: heat shock cognate protein 80-like, partial	Cucumis melo	NA	NA	NA	NA	NA
TR33161|c0_g4_i1	129.115	239.228	0.889731	0.0206869	0.834127	No	PREDICTED: uncharacterized protein LOC105174187	Sesamum indicum	NA	NA	NA	NA	NA
TR32159|c0_g1_i4	86.0767	159.486	0.889731	0.0328582	0.941767	No	PREDICTED: probable beta-1,3-galactosyltransferase 19	Sesamum indicum	NA	NA	NA	NA	NA
TR33807|c0_g3_i1	43.0384	79.7428	0.889731	0.0710471	1.10247	No	PREDICTED: tankyrase-2	Sesamum indicum	NA	NA	NA	NA	NA
TR33912|c0_g2_i1	43.0384	79.7428	0.889731	0.0710471	1.10197	No	PREDICTED: ATP-dependent Clp protease proteolytic subunit 5, chloroplastic-like	Sesamum indicum	NA	NA	NA	NA	NA
TR34760|c2_g4_i3	43.0384	79.7428	0.889731	0.0710471	1.10172	No	NA	NA	NA	NA	NA	NA	NA
TR35393|c0_g2_i2	43.0384	79.7428	0.889731	0.0710471	1.10272	No	uncharacterized protein LOC100779170	Glycine max	NA	regulation of transcription, DNA-templated[GO:0006355]	histone binding[GO:0042393] ; zinc ion binding[GO:0008270]	NA	NA
TR36434|c1_g10_i2	43.0384	79.7428	0.889731	0.0710471	1.10297	No	mevalonate kinase	Salvia miltiorrhiza	NA	phosphorylation[GO:0016310] ; isoprenoid biosynthetic process[GO:0008299]	mevalonate kinase activity[GO:0004496] ; ATP binding[GO:0005524]	cytoplasm[GO:0005737]	map01130:Biosynthesis of antibiotics(kinase[ec:2.7.1.36]) ; map00900:Terpenoid backbone biosynthesis(kinase[ec:2.7.1.36])
TR41829|c2_g3_i4	43.0384	79.7428	0.889731	0.0710471	1.10222	No	PREDICTED: uncharacterized protein LOC105177156	Sesamum indicum	NA	NA	NA	NA	NA
TR23850|c0_g3_i1	309.094	572.512	0.889263	0.0113226	0.684214	No	hypothetical protein CICLE_v10013090mg	Citrus clementina	NA	NA	heat shock protein binding[GO:0031072] ; unfolded protein binding[GO:0051082]	integral component of membrane[GO:0016021]	NA
TR3073|c1_g3_i4	68.4701	126.771	0.888674	0.0434313	1.00738	No	PREDICTED: uncharacterized protein At5g39865-like	Sesamum indicum	NA	NA	NA	NA	NA
TR43403|c0_g1_i3	127.159	235.139	0.886883	0.0214204	0.844347	No	PREDICTED: probable galactinol--sucrose galactosyltransferase 2	Sesamum indicum	NA	NA	NA	NA	NA
TR23850|c0_g2_i4	127.159	235.139	0.886883	0.0214204	0.843862	No	hypothetical protein MIMGU_mgv1a015868mg	Mimulus guttatus	NA	NA	NA	NA	NA
TR34395|c1_g5_i1	76.2953	141.083	0.886883	0.0387617	0.972403	No	PREDICTED: protein TIFY 10A-like isoform X2	Sesamum indicum	NA	NA	NA	NA	NA
TR41962|c1_g4_i3	50.8635	94.0556	0.886883	0.0608808	1.06304	No	PREDICTED: 1,4-alpha-glucan-branching enzyme-like	Erythranthe guttatus	NA	NA	NA	NA	NA
TR35063|c1_g5_i4	50.8635	94.0556	0.886883	0.0608808	1.06331	No	hypothetical protein MIMGU_mgv1a014159mg	Mimulus guttatus	NA	NA	NA	integral component of membrane[GO:0016021]	NA
TR39230|c3_g1_i1	50.8635	94.0556	0.886883	0.0608808	1.06277	No	NA	NA	NA	NA	NA	NA	NA
TR14450|c0_g1_i1	25.4318	47.0278	0.886883	0.109408	1.15892	No	hypothetical protein M569_04026, partial	Genlisea aurea	NA	vesicle-mediated transport[GO:0016192] ; intracellular protein transport[GO:0006886]	structural molecule activity[GO:0005198]	clathrin coat of coated pit[GO:0030132] ; clathrin coat of trans-Golgi network vesicle[GO:0030130]	NA
TR31805|c0_g2_i5	25.4318	47.0278	0.886883	0.109408	1.1582	No	hypothetical protein MIMGU_mgv1a012980mg	Mimulus guttatus	NA	NA	NA	integral component of membrane[GO:0016021]	NA
TR37212|c0_g2_i1	25.4318	47.0278	0.886883	0.109408	1.15588	No	PREDICTED: probable prolyl 4-hydroxylase 9	Sesamum indicum	NA	NA	NA	NA	NA
TR38939|c3_g5_i2	25.4318	47.0278	0.886883	0.109408	1.15713	No	hypothetical protein MIMGU_mgv1a0038971mg, partial	Mimulus guttatus	NA	metabolic process[GO:0008152]	oxidoreductase activity[GO:0016491]	NA	NA
TR39619|c2_g2_i1	25.4318	47.0278	0.886883	0.109408	1.15856	No	PREDICTED: E3 ubiquitin-protein ligase At1g63170-like	Sesamum indicum	NA	NA	NA	NA	NA
TR41663|c2_g3_i1	25.4318	47.0278	0.886883	0.109408	1.15606	No	PREDICTED: benzyl alcohol O-benzoyltransferase	Prunus mume	NA	NA	NA	NA	NA
TR44073|c1_g1_i1	25.4318	47.0278	0.886883	0.109408	1.15642	No	PREDICTED: probable RNA helicase SDE3	Sesamum indicum	NA	NA	NA	NA	NA
TR21870|c0_g1_i2	25.4318	47.0278	0.886883	0.109408	1.15677	No	NA	NA	NA	NA	NA	NA	NA
TR27078|c0_g2_i3	25.4318	47.0278	0.886883	0.109408	1.15695	No	PREDICTED: uncharacterized protein LOC105172366 isoform X1	Sesamum indicum	NA	NA	NA	NA	NA
TR31007|c0_g6_i1	25.4318	47.0278	0.886883	0.109408	1.15553	No	PREDICTED: vacuolar protein sorting-associated protein 2 homolog 2-like	Sesamum indicum	NA	NA	NA	NA	NA
TR32413|c0_g2_i1	25.4318	47.0278	0.886883	0.109408	1.15749	No	NA	NA	NA	NA	NA	NA	NA
TR34073|c0_g3_i5	25.4318	47.0278	0.886883	0.109408	1.15767	No	PREDICTED: D-cysteine desulfhydrase 2, mitochondrial	Erythranthe guttatus	NA	NA	NA	NA	NA
TR36273|c0_g6_i12	25.4318	47.0278	0.886883	0.109408	1.15785	No	PREDICTED: ankyrin repeat and SAM domain-containing protein 4B-like	Sesamum indicum	NA	NA	NA	NA	NA
TR36625|c0_g4_i1	25.4318	47.0278	0.886883	0.109408	1.15838	No	unknown	Lotus japonicus	NA	NA	NA	NA	NA
TR40182|c2_g5_i1	25.4318	47.0278	0.886883	0.109408	1.15802	No	NA	NA	NA	NA	NA	NA	NA
TR4040|c1_g1_i5	25.4318	47.0278	0.886883	0.109408	1.15731	No	hypothetical protein MIMGU_mgv1a007631mg	Mimulus guttatus	NA	NA	NA	NA	NA
TR40955|c0_g1_i1	25.4318	47.0278	0.886883	0.109408	1.15874	No	hypothetical protein MIMGU_mgv1a020107mg	Mimulus guttatus	NA	protein phosphorylation[GO:0006468]	protein kinase activity[GO:0004672] ; calcium ion binding[GO:0005509] ; ATP binding[GO:0005524]	NA	NA
TR42921|c0_g3_i7	25.4318	47.0278	0.886883	0.109408	1.1566	No	hypothetical protein MIMGU_mgv1a004258mg	Mimulus guttatus	NA	NA	NA	NA	NA
TR29521|c1_g1_i1	25.4318	47.0278	0.886883	0.109408	1.15571	No	hypothetical protein MIMGU_mgv1a006158mg	Mimulus guttatus	NA	metabolic process[GO:0008152]	transferase activity, transferring hexosyl groups[GO:0016758]	NA	NA
TR51771|c0_g1_i1	25.4318	47.0278	0.886883	0.109408	1.15624	No	NA	NA	NA	NA	NA	NA	NA
TR38990|c0_g2_i1	465.597	860.813	0.886619	0.0104143	0.672588	No	unnamed protein product	Coffea canephora	NA	fatty acid beta-oxidation[GO:0006635]	flavin adenine dinucleotide binding[GO:0050660] ; acyl-CoA dehydrogenase activity[GO:0003995] ; acyl-CoA oxidase activity[GO:0003997]	peroxisome[GO:0005777]	map00071:Fatty acid degradation(oxidase[ec:1.3.3.6]) ; map01040:Biosynthesis of unsaturated fatty acids(oxidase[ec:1.3.3.6]) ; map00592:alpha-Linolenic acid metabolism(oxidase[ec:1.3.3.6])
TR38312|c0_g1_i3	626.013	1157.29	0.886491	0.0106191	0.675006	No	putative solanesyl diphosphate synthase	Salvia miltiorrhiza	NA	isoprenoid biosynthetic process[GO:0008299] ; photosynthesis[GO:0015979]	transferase activity, transferring alkyl or aryl (other than methyl) groups[GO:0016765]	NA	NA
TR33095|c0_g6_i5	13384.9	24732.5	0.885801	0.181409	1.18408	No	NA	NA	NA	NA	NA	NA	NA
TR44246|c1_g3_i1	935.106	1727.76	0.885701	0.0124688	0.707359	No	PREDICTED: elongation factor G-1, chloroplastic	Sesamum indicum	NA	NA	NA	NA	NA
TR3986|c0_g3_i2	168.241	310.792	0.885423	0.0170319	0.789836	No	PREDICTED: short-chain dehydrogenase TIC 32, chloroplastic-like isoform X2	Erythranthe guttatus	NA	NA	NA	NA	NA
TR29273|c0_g1_i5	688.614	1271.8	0.8851	0.0109973	0.677085	No	NA	NA	NA	NA	NA	NA	NA
TR30906|c1_g2_i6	58.6887	108.368	0.88479	0.0527041	1.0548	No	hypothetical protein MIMGU_mgv1a014245mg	Mimulus guttatus	NA	NA	NA	NA	NA
TR33411|c0_g3_i11	58.6887	108.368	0.88479	0.0527041	1.05542	No	PREDICTED: OTU domain-containing protein At3g57810-like isoform X3	Erythranthe guttatus	NA	NA	NA	NA	NA
TR38948|c0_g3_i2	58.6887	108.368	0.88479	0.0527041	1.05511	No	hypothetical protein PRUPE_ppa007945mg	Prunus persica	NA	nucleotide-sugar transport[GO:0015780]	NA	integral component of membrane[GO:0016021]	NA
TR42579|c0_g1_i2	150.634	278.077	0.884437	0.0187596	0.808714	No	PREDICTED: ARF guanine-nucleotide exchange factor GNOM-like	Sesamum indicum	NA	NA	NA	NA	NA
TR42649|c2_g8_i3	217.148	400.759	0.884055	0.014344	0.744749	No	NA	NA	NA	NA	NA	NA	NA
TR30667|c3_g1_i6	258.23	476.412	0.883553	0.0129574	0.721356	No	PREDICTED: myb-related protein Myb4-like	Sesamum indicum	NA	NA	NA	NA	NA
TR25787|c1_g1_i1	33.2569	61.3406	0.883188	0.0915578	1.13515	No	PREDICTED: LOW QUALITY PROTEIN: uncharacterized protein LOC105170153	Sesamum indicum	NA	NA	NA	NA	NA
TR3247|c1_g4_i4	33.2569	61.3406	0.883188	0.0915578	1.13618	No	NA	NA	NA	NA	NA	NA	NA
TR39905|c0_g2_i1	33.2569	61.3406	0.883188	0.0915578	1.13433	No	PREDICTED: adenosine kinase	Sesamum indicum	NA	NA	NA	NA	NA
TR42963|c1_g2_i6	33.2569	61.3406	0.883188	0.0915578	1.13474	No	PREDICTED: probable UDP-N-acetylglucosamine--peptide N-acetylglucosaminyltransferase SPINDLY	Sesamum indicum	NA	NA	NA	NA	NA
TR7296|c0_g1_i2	33.2569	61.3406	0.883188	0.0915578	1.13577	No	PREDICTED: ras-related protein RABA5b-like	Sesamum indicum	NA	NA	NA	NA	NA
TR22877|c0_g1_i1	33.2569	61.3406	0.883188	0.0915578	1.13659	No	PREDICTED: probable alpha,alpha-trehalose-phosphate synthase [UDP-forming] 10	Sesamum indicum	NA	NA	NA	NA	NA
TR27319|c0_g2_i1	33.2569	61.3406	0.883188	0.0915578	1.13454	No	PREDICTED: uncharacterized protein LOC105159236 isoform X1	Sesamum indicum	NA	NA	NA	NA	NA
TR29504|c0_g2_i3	33.2569	61.3406	0.883188	0.0915578	1.13639	No	NA	NA	NA	NA	NA	NA	NA
TR29691|c0_g1_i3	33.2569	61.3406	0.883188	0.0915578	1.13536	No	PREDICTED: protein BOBBER 1	Sesamum indicum	NA	NA	NA	NA	NA
TR33130|c2_g1_i20	33.2569	61.3406	0.883188	0.0915578	1.13413	No	NA	NA	NA	NA	NA	NA	NA
TR36202|c0_g3_i1	33.2569	61.3406	0.883188	0.0915578	1.13598	No	cytochrome P450 CYP72A330	Salvia miltiorrhiza	NA	oxidation-reduction process[GO:0055114]	heme binding[GO:0020037] ; oxidoreductase activity, acting on paired donors, with incorporation or reduction of molecular oxygen[GO:0016705] ; monooxygenase activity[GO:0004497] ; iron ion binding[GO:0005506]	NA	NA
TR3817|c0_g3_i2	33.2569	61.3406	0.883188	0.0915578	1.13392	No	hypothetical protein MIMGU_mgv1a0106401mg, partial	Mimulus guttatus	NA	protein dephosphorylation[GO:0006470]	phosphoprotein phosphatase activity[GO:0004721]	NA	map04660:T cell receptor signaling pathway(phosphatase[ec:3.1.3.16])
TR40085|c0_g4_i6	33.2569	61.3406	0.883188	0.0915578	1.13557	No	PREDICTED: uncharacterized protein LOC105158512	Sesamum indicum	NA	NA	NA	NA	NA
TR52604|c0_g2_i1	33.2569	61.3406	0.883188	0.0915578	1.13495	No	NA	NA	NA	NA	NA	NA	NA
TR39705|c0_g1_i6	1465.26	2701.03	0.882353	0.017398	0.789726	No	cytochrome P450 CYP74B21	Salvia miltiorrhiza	NA	oxidation-reduction process[GO:0055114]	heme binding[GO:0020037] ; oxidoreductase activity, acting on paired donors, with incorporation or reduction of molecular oxygen[GO:0016705] ; monooxygenase activity[GO:0004497] ; iron ion binding[GO:0005506]	NA	NA
TR27392|c0_g1_i2	371.695	684.97	0.881922	0.0112683	0.681534	No	PREDICTED: uncharacterized protein LOC105168359	Sesamum indicum	NA	NA	NA	NA	NA
TR42595|c0_g2_i4	74.339	136.994	0.881922	0.0411886	0.997881	No	PREDICTED: mechanosensitive ion channel protein 2, chloroplastic-like	Sesamum indicum	NA	NA	NA	NA	NA
TR44327|c0_g5_i2	313.006	576.602	0.881384	0.0120113	0.699338	No	PREDICTED: heat shock 70 kDa protein 17	Sesamum indicum	NA	NA	NA	NA	NA
TR35701|c0_g1_i4	156.503	288.301	0.881384	0.0185949	0.806685	No	NA	NA	NA	NA	NA	NA	NA
TR33390|c0_g1_i5	123.246	226.96	0.880897	0.0230272	0.868259	No	PREDICTED: syntaxin-112-like	Sesamum indicum	NA	NA	NA	NA	NA
TR41766|c0_g2_i2	41.0821	75.6534	0.880897	0.0773931	1.11657	No	PREDICTED: uncharacterized protein LOC105161630 isoform X2	Sesamum indicum	NA	NA	NA	NA	NA
TR44407|c2_g2_i3	41.0821	75.6534	0.880897	0.0773931	1.1168	No	NA	NA	NA	NA	NA	NA	NA
TR3508|c0_g2_i3	41.0821	75.6534	0.880897	0.0773931	1.11704	No	PREDICTED: peroxisomal membrane protein PMP22-like	Sesamum indicum	NA	NA	NA	NA	NA
TR7820|c0_g5_i2	41.0821	75.6534	0.880897	0.0773931	1.11727	No	PREDICTED: peptide deformylase 1A, chloroplastic	Sesamum indicum	NA	NA	NA	NA	NA
TR31482|c1_g1_i9	41.0821	75.6534	0.880897	0.0773931	1.11798	No	hypothetical protein	Beta vulgaris	NA	NA	NA	NA	NA
TR41052|c1_g1_i4	41.0821	75.6534	0.880897	0.0773931	1.11751	No	hypothetical protein MIMGU_mgv1a001736mg	Mimulus guttatus	NA	NA	metal ion binding[GO:0046872]	NA	NA
TR44914|c0_g1_i1	41.0821	75.6534	0.880897	0.0773931	1.11774	No	NA	NA	NA	NA	NA	NA	NA
TR26444|c0_g1_i1	408.864	752.445	0.879963	0.0111966	0.677797	No	hypothetical protein MIMGU_mgv1a015733mg	Mimulus guttatus	NA	metabolic process[GO:0008152]	ATP binding[GO:0005524] ; ligase activity[GO:0016874]	NA	NA
TR43177|c0_g1_i1	48.9072	89.9662	0.879336	0.0659411	1.08823	No	hypothetical protein MIMGU_mgv1a0020631mg, partial	Mimulus guttatus	NA	pyruvate metabolic process[GO:0006090] ; phosphorylation[GO:0016310]	pyruvate, phosphate dikinase activity[GO:0050242] ; kinase activity[GO:0016301] ; ATP binding[GO:0005524]	NA	map00720:Carbon fixation pathways in prokaryotes(phosphate dikinase[ec:2.7.9.1]) ; map00620:Pyruvate metabolism(phosphate dikinase[ec:2.7.9.1]) ; map00710:Carbon fixation in photosynthetic organisms(phosphate dikinase[ec:2.7.9.1])
TR43900|c3_g3_i4	48.9072	89.9662	0.879336	0.0659411	1.08797	No	NA	NA	NA	NA	NA	NA	NA
TR42762|c1_g1_i4	260.186	478.457	0.878843	0.0134003	0.719723	No	PREDICTED: probable receptor-like protein kinase At1g67000	Erythranthe guttatus	NA	NA	NA	NA	NA
TR32703|c1_g1_i11	105.64	194.245	0.878729	0.0275698	0.895751	No	PREDICTED: nudix hydrolase 2-like isoform X2	Erythranthe guttatus	NA	NA	NA	NA	NA
TR38691|c1_g2_i1	56.7324	104.279	0.878205	0.0567074	1.06413	No	PREDICTED: beta-fructofuranosidase, soluble isoenzyme I-like	Sesamum indicum	NA	NA	NA	NA	NA
TR36966|c0_g1_i7	64.5575	118.592	0.877347	0.0494764	1.03934	No	PREDICTED: uncharacterized protein ycf45 isoform X2	Sesamum indicum	NA	NA	NA	NA	NA
TR29280|c0_g1_i2	64.5575	118.592	0.877347	0.0494764	1.0387	No	hypothetical protein M569_04644, partial	Genlisea aurea	NA	NA	NA	NA	NA
TR41809|c0_g3_i1	64.5575	118.592	0.877347	0.0494764	1.03902	No	PREDICTED: cystathionine gamma-synthase 1, chloroplastic-like	Erythranthe guttatus	NA	NA	NA	NA	NA
TR36967|c1_g1_i2	72.3827	132.905	0.876675	0.0438196	0.998157	No	hypothetical protein MIMGU_mgv1a006625mg	Mimulus guttatus	NA	NA	NA	integral component of membrane[GO:0016021]	NA
TR44215|c1_g5_i3	72.3827	132.905	0.876675	0.0438196	0.997826	No	NA	NA	NA	NA	NA	NA	NA
TR3029|c0_g4_i2	80.2079	147.217	0.876134	0.0390298	0.976272	No	NA	NA	NA	NA	NA	NA	NA
TR3121|c0_g1_i1	80.2079	147.217	0.876134	0.0390298	0.97556	No	PREDICTED: carbamoyl-phosphate synthase large chain, chloroplastic	Sesamum indicum	NA	NA	NA	NA	NA
TR37890|c0_g3_i7	80.2079	147.217	0.876134	0.0390298	0.975916	No	NA	NA	NA	NA	NA	NA	NA
TR35838|c1_g2_i2	88.033	161.53	0.875688	0.0349931	0.948646	No	PREDICTED: uncharacterized protein LOC105170041	Sesamum indicum	NA	NA	NA	NA	NA
TR28910|c1_g1_i2	88.033	161.53	0.875688	0.0349931	0.949397	No	PREDICTED: uncharacterized protein LOC105960631	Erythranthe guttatus	NA	NA	NA	NA	NA
TR40120|c0_g1_i2	88.033	161.53	0.875688	0.0349931	0.949021	No	PREDICTED: transmembrane 9 superfamily member 3	Sesamum indicum	NA	NA	NA	NA	NA
TR35210|c0_g2_i1	95.8582	175.843	0.875316	0.031645	0.931916	No	NA	NA	NA	NA	NA	NA	NA
TR38691|c2_g1_i1	103.683	190.156	0.874999	0.0288983	0.919318	No	vacuolar invertase NvINV	Elsholtzia haichowensis	NA	carbohydrate metabolic process[GO:0005975]	sucrose alpha-glucosidase activity[GO:0004575]	integral component of membrane[GO:0016021]	map00500:Starch and sucrose metabolism(alpha-glucosidase[ec:3.2.1.48]) ; map00500:Starch and sucrose metabolism(invertase[ec:3.2.1.26]) ; map00052:Galactose metabolism(invertase[ec:3.2.1.26])
TR34142|c0_g8_i3	389.302	713.596	0.874219	0.0118596	0.697014	No	NA	NA	NA	NA	NA	NA	NA
TR39963|c2_g2_i4	547.761	1003.94	0.874057	0.0115296	0.68466	No	NA	NA	NA	NA	NA	NA	NA
TR40234|c2_g2_i1	187.804	343.507	0.871116	0.0175	0.789653	No	PREDICTED: uncharacterized protein LOC105175605 isoform X1	Sesamum indicum	NA	NA	NA	NA	NA
TR43123|c1_g3_i5	133.028	243.318	0.871116	0.0230114	0.868141	No	PREDICTED: peptidyl-prolyl cis-trans isomerase FKBP62-like	Nicotiana tomentosiformis	NA	NA	NA	NA	NA
TR7658|c7_g8_i2	125.203	229.005	0.871116	0.0243127	0.859111	No	hypothetical protein MIMGU_mgv1a021816mg	Mimulus guttatus	NA	response to auxin[GO:0009733]	NA	NA	NA
TR3986|c0_g3_i6	109.552	200.379	0.871116	0.0278756	0.901415	No	NA	NA	NA	NA	NA	NA	NA
TR36718|c0_g1_i2	93.9019	171.754	0.871116	0.033347	0.935831	No	NA	NA	NA	NA	NA	NA	NA
TR33799|c0_g3_i1	86.0767	157.441	0.871116	0.037019	0.969462	No	hypothetical protein MIMGU_mgv1a009899mg	Mimulus guttatus	NA	NA	NA	NA	NA
TR38378|c0_g1_i1	86.0767	157.441	0.871116	0.037019	0.969832	No	putative 1-deoxy-D-xylulose 5-phosphate synthase of	Salvia miltiorrhiza	NA	NA	NA	NA	NA
TR3349|c0_g2_i1	78.2516	143.128	0.871116	0.0414398	0.99483	No	hypothetical protein MIMGU_mgv1a026066mg	Mimulus guttatus	NA	NA	NA	NA	NA
TR25834|c0_g1_i2	70.4264	128.815	0.871116	0.0466734	1.01722	No	PREDICTED: protein transport protein SEC23-like	Solanum lycopersicum	NA	intracellular transport[GO:0046907] ; protein transport[GO:0015031]	NA	NA	NA
TR32552|c0_g1_i3	70.4264	128.815	0.871116	0.0466734	1.01754	No	PREDICTED: peroxisomal adenine nucleotide carrier 1-like	Sesamum indicum	NA	NA	NA	NA	NA
TR43972|c1_g2_i1	70.4264	128.815	0.871116	0.0466734	1.01657	No	NA	NA	NA	NA	NA	NA	NA
TR42559|c0_g1_i2	70.4264	128.815	0.871116	0.0466734	1.0169	No	PREDICTED: stress-associated endoplasmic reticulum protein 2-like	Malus domestica	NA	NA	NA	NA	NA
TR42762|c1_g6_i3	62.6013	114.502	0.871116	0.0529932	1.05566	No	PREDICTED: probable receptor-like protein kinase At5g39030	Populus euphratica	NA	NA	NA	NA	NA
TR36096|c0_g2_i2	54.7761	100.19	0.871116	0.0611624	1.06309	No	PREDICTED: IAA-amino acid hydrolase ILR1-like 2	Sesamum indicum	NA	NA	NA	NA	NA
TR7284|c0_g1_i2	54.7761	100.19	0.871116	0.0611624	1.06336	No	PREDICTED: beta-glucosidase 12-like	Erythranthe guttatus	NA	NA	NA	NA	NA
TR3510|c0_g1_i4	46.9509	85.8769	0.871116	0.0715952	1.10249	No	PREDICTED: protein RER1A-like	Sesamum indicum	NA	NA	NA	NA	NA
TR32552|c0_g3_i1	39.1258	71.5641	0.871116	0.0845007	1.12145	No	PREDICTED: peroxisomal adenine nucleotide carrier 1-like	Sesamum indicum	NA	NA	NA	NA	NA
TR40196|c0_g3_i2	39.1258	71.5641	0.871116	0.0845007	1.12123	No	PREDICTED: serine/threonine-protein kinase CDL1	Sesamum indicum	NA	NA	NA	NA	NA
[truncated: 66,588 more rows]
