# Supplementary material for: Altered Developmental and Metabolic Gene Expression in Basil Interspecific Hybrids
Source: Plants (Basel). 2022 Jul 18;11(14):1873. doi: 10.3390/plants11141873 (PMC9321874; doi:10.3390/plants11141873)
Supplement: Supplementary file 1 [file plants-11-01873-s001.zip › Table S14_List of primers used in Real-Time PCR.xlsx]

## Sheet: Sheet1
S. No.	PRIMER NAME	PRIMER SEQUENCE (5'-3')
1	Actin_F	AGATTCCTCCAGCAAATCTTTCTC
2	Actin_R	CTTTCTGGTGGAACAGCATCAA
3	PAL_F	CATCGATCAGCGGGTTGTC
4	PAL_R	CCGCACCGCCACAAAG
5	4CL_F	TTTGCGAATGCCAAACACA
6	4CL_R	TGGGCAGGGTTATGGAATGA
7	C4H_F	TTGGTCCGGGAGTCCAAATA
8	C4H_R	TCACGGCCTGAAGGTATGG
9	EGS_F	GGAGGAAAATGGGATGAAAAGC
10	EGS_R	AAGTTGGGTGCCCTAATTTGAG
11	EOMT_F	GCCTCGCGCCTCCTCTTG
12	EOMT_R	AAGTGGGATCCAAAATGACTTG
13	COMT_F	GCCTCACGCCTCCTCTTG
14	COMT_R	AAGTGGGATCCAAAACGACTTG
15	CHS_F	CGCGATCCAGAATACCGAAT
16	CHS_R	GAGCTTGAAGGAGGCGTT
17	DFR_F	GTTTGAAGGCATCGACAAGGA
18	DFR_R	AACCCCATTCCCACCAATTT
19	F3’H_F	TGTATGTGCCACAAACGCAAT
20	F3’H_R	CCATCTCCGTCGCTCAACA
21	SDD1_F	GGCCCGTCGTCTGAATTAGA
22	SDD1_R	CTCCCATCGACGTTTTCCA
23	EPF9_F	TGTTTATAGGGTCATTCCCTTCAAC
24	EPF9_R	CGAGGGTGCCGGTATAAGTG
25	CLAVATA1_F	CAGGACGAATCCCGGTTTC
26	CLAVATA1_R	CGACTGAGATCGATGAACGTTAA
27	GTL_F	TGCTCGCGCTTCTCTATGG
28	GTL_R	CAAGTGATGCAGAAGCAGGAAT
29	MYB_ETC3_F	TTGTGAAAATGACCGAGCAAGA
30	MYB_ETC3_R	GTCCCACTTGTCTCCCACAAG
31	CONSTANS_LIKE5_F	CGAATCGTTTTCTCGAATTTCC
32	CONSTANS_LIKE5_R	GAGGCCCGGGTTTTAAGGT
33	HemF_F	CGGCCAAACCCACTGAAA
34	HemF_R	CAGCAGCAAAAAACGGAACAG
35	HemH_F	CCGCGAATGCCAATGGT
36	HemH_R	CCGTCCTGGCAAGATGCT
37	ChlM_F	TCCTTATCCTCCACCCCACTT
38	ChlM_R	TCACGCTGAGGCTGATGTTG
39	PAO_F	TTGGAGGTCGTTGAGGGAGTA
40	PAO_R	CTGCGCATTGCTCTTGGA
41	TR2167|c0_g1_i4_F	TCCCATCCCTTCTCAATGCT
42	TR2167|c0_g1_i4_R	GCAGTTATGCCCAAGGAATGA
43	TR2178|c4_g2_i1_F	TCAATTTCGCCTTCCGATTC
44	TR2178|c4_g2_i1_R	TGACGTATCTTTGCTGGACAATG
45	TR2228|c0_g2_i2_F	CCATCCCCCAATCACAATAAA
46	TR2228|c0_g2_i2_R	TGGCTCAACAAGTTTGCGTATG
47	TR2340|c0_g1_i8_F	TCCCACTCCCACTACAACTCAA
48	TR2340|c0_g1_i8_R	TTTGTAATTTTGGTGTTATGGTTGTTT
49	TR3010|c0_g1_i3_F	GAGATGAAGCCGAAGCCTTTC
50	TR3010|c0_g1_i3_R	GATTGGGACGGTGAAGTGGTT
51
51	TR19069|c0_g1_i1_F	AACCCCCTCAATCACACTAACAGT
52	TR19069|c0_g1_i1_R	ACTTGCCCAGATTTGGAGAAGA
53	TR24521|c0_g1_i2_F	AACAGACCTTCTTGACCAATATCTGA
54	TR24521|c0_g1_i2_R	TTGGCTTTGTTTTCTTGGGATT
55	TR24798|c0_g2_i1_F	GGAGGTGGTGATGAAGAGAAAGA
56	TR24798|c0_g2_i1_R	AAGCCAACACCATTCCTAATCCT
57	TR25573|c1_g1_i2_F	TCCTCACTAACTCCATTGCAGCTA
58	TR25573|c1_g1_i2_R	TGTGGCAGAAGGAGGTGAAGT
59	TR29125|c1_g1_i7_F	CTCCCAAGCCCAAGAAACCT
60	TR29125|c1_g1_i7_R	TGACGATCTGCCCCTTCTTC
61	TR29515|c0_g1_i3_F	CATCTCGGACGGGACAAGAT
62	TR29515|c0_g1_i3_R	GTGCCACAGTTAGAACCACACTTT
63	TR29763|c3_g1_i2_F	CAGGAGGCGGCGTTTTG
64	TR29763|c3_g1_i2_R	TCCCCATCGCTCTCCAACT
65	TR30451|c0_g2_i3_F	AAGCCAGGAGGGATGGTTTT
66	TR30451|c0_g2_i3_R	CGCGCTTAGTGCCTTGGTTA
67	TR2167|c0_g1_i4_F	TCCCATCCCTTCTCAATGCT
68	TR3606|c0_g3_i1 _F	CATGCATGCTTAAGGAGTTTTTGTA
69	TR3606|c0_g3_i1 _R	AACTATAAAAATAACCCAAGACAAAATTAAAATAC
70	TR28288|c0_g1_i1_F	CAGCACCAGCTAGCAGCATCT
71	TR28288|c0_g1_i1_R	GCACAGGCCATGGTGTTTG
72	TR31771|c0_g1_i2_F	CGACGGCGGTAACTTTCCT
73	TR31771|c0_g1_i2_R	CGAGGTCGGCAAATAAAAAGG
74	TR32654|c0_g1_i1_F	CGCTGGTGATAGCCCTGTCT
75	TR32654|c0_g1_i1_R	GGCCTACCGTCTTCGCATT
76	TR35271|c1_g2_i2_F	GGCGCCGGACACAAACTA
77	TR35271|c1_g2_i2_R	TTGCTGCTGTTGTCGGTTTT
79	TR40311|c1_g6_i3_F	CTGAATATCGGCGACGAGAAG
80	TR40311|c1_g6_i3_R	GTCGAAGGCAGTGGAAGCTT
81	TR40311|c1_g8_i1_F	TCGATAACATCTGCACGTTCGT
82	TR40311|c1_g8_i1_R	CCGATAACCTGTTGGGATCGT
83	TR40765|c0_g2_i3_F	TCTGAGAGTTCGGATGCCAAT
84	TR40765|c0_g2_i3_R	AAATTCCGCGGGTTGCTTA
85	TR43055|c2_g1_i11_F	GAAGCCTTTCTGCGCGATAT
86	TR43055|c2_g1_i11_R	TGATCGTACCCTCTCTGAAGGAA
87	TR43055|c2_g1_i15_F	ATTCAGCGCACATGTTTCTCAT
88	TR43055|c2_g1_i15_R	CCGTCCAGCAGTCCAGTGA
89	TR43412|c0_g2_i1_F	TCCCGGGTTTCGTGGAT
90	TR43412|c0_g2_i1_R	CGGACACGATCATGGATCTCT
