# Supplementary material for: Altered Developmental and Metabolic Gene Expression in Basil Interspecific Hybrids
Source: Plants (Basel). 2022 Jul 18;11(14):1873. doi: 10.3390/plants11141873 (PMC9321874; doi:10.3390/plants11141873)
Supplement: Supplementary file 1 [file plants-11-01873-s001.zip › Table S15_FPKM.xlsx]

## Sheet: OK_P2
OK_P2	FPKM
TR1002|c0_g1_i1	34.05
TR10112|c0_g1_i1	15.13
TR10224|c0_g1_i1	17.31
TR10233|c0_g1_i1	87.04
TR10273|c0_g1_i1	22.28
TR1033|c0_g1_i1	36.57
TR10332|c0_g1_i1	30.95
TR10370|c0_g2_i1	42.26
TR1051|c0_g1_i1	49.5
TR10582|c0_g1_i1	19.02
TR10620|c1_g1_i1	47.35
TR1064|c0_g1_i1	22.21
TR1073|c0_g1_i1	18.78
TR10809|c0_g1_i1	34.26
TR10833|c0_g1_i1	21.57
TR10841|c0_g1_i1	23.61
TR11017|c0_g1_i1	29.78
TR1105|c0_g1_i1	120.51
TR1107|c0_g1_i1	37.43
TR11088|c0_g1_i1	21.94
TR11094|c0_g1_i1	15.47
TR11161|c0_g1_i1	15.01
TR11233|c0_g1_i1	217.82
TR11284|c0_g1_i1	65.74
TR11454|c0_g1_i1	34.05
TR11608|c0_g1_i1	16.03
TR1170|c0_g1_i1	73.34
TR12140|c0_g1_i1	23.17
TR1215|c0_g1_i1	27.33
TR12208|c0_g1_i1	32.43
TR12213|c0_g2_i1	23.79
TR1225|c0_g1_i1	41.56
TR12295|c0_g1_i1	75.97
TR12459|c0_g1_i1	16.7
TR12468|c0_g1_i1	36.62
TR12479|c0_g1_i1	29.69
TR1251|c0_g1_i1	43.33
TR12667|c0_g1_i1	19.04
TR12669|c0_g1_i1	13.43
TR12715|c0_g1_i1	32.08
TR1281|c0_g1_i1	34.36
TR12856|c0_g1_i1	99.98
TR12868|c0_g1_i1	36.47
TR12900|c0_g1_i1	61.73
TR12958|c0_g1_i1	26.24
TR12988|c0_g1_i1	25.62
TR1304|c0_g1_i1	64.28
TR1306|c0_g1_i1	31.02
TR13218|c0_g1_i1	20.13
TR13277|c0_g3_i1	31.74
TR13280|c0_g1_i1	102.86
TR13314|c0_g1_i1	14.09
TR13317|c0_g1_i1	38.22
TR13339|c0_g1_i1	37.52
TR13349|c0_g1_i1	35.43
TR13351|c0_g3_i1	36.57
TR13380|c0_g1_i1	80.59
TR13443|c0_g1_i1	95.37
TR13462|c0_g1_i2	8.95
TR13486|c0_g4_i1	60
TR13495|c0_g1_i1	18.72
TR1350|c0_g1_i1	23.42
TR13535|c0_g1_i1	100.01
TR13551|c0_g1_i1	73.06
TR13553|c0_g2_i1	45.24
TR13723|c0_g1_i1	42.86
TR13868|c0_g1_i1	26.39
TR13916|c0_g1_i1	13.01
TR13937|c0_g1_i1	12.73
TR1396|c0_g1_i1	62.02
TR13999|c0_g1_i1	16.22
TR14023|c0_g1_i1	21.66
TR14079|c0_g1_i1	39.91
TR14114|c0_g1_i1	135.03
TR14130|c0_g1_i1	36.29
TR14146|c0_g1_i1	13.26
TR14298|c0_g1_i1	29.63
TR14437|c0_g1_i1	37.15
TR14441|c0_g1_i1	66.76
TR14450|c0_g1_i1	72.32
TR14465|c0_g1_i1	14.09
TR14490|c0_g1_i1	30.81
TR14577|c0_g1_i1	34.55
TR14599|c0_g1_i1	77.88
TR14609|c0_g1_i1	44.95
TR1463|c0_g2_i1	13.75
TR14644|c0_g1_i1	31.74
TR14694|c0_g1_i1	11.93
TR14741|c0_g1_i1	14.26
TR1477|c0_g1_i1	48.07
TR14770|c0_g1_i1	205.73
TR1484|c0_g1_i1	15.47
TR14949|c0_g1_i1	85.58
TR14972|c0_g1_i1	92.57
TR14979|c0_g1_i1	182.82
TR14979|c0_g1_i2	30.24
TR15038|c0_g1_i1	236.79
TR15067|c0_g1_i1	53.58
TR15093|c0_g1_i1	24.79
TR15132|c0_g1_i1	124.26
TR15135|c0_g1_i1	26.15
TR15154|c0_g1_i1	31.92
TR15179|c0_g1_i1	23.06
TR1520|c0_g1_i1	18.68
TR15230|c0_g1_i1	10.92
TR15242|c0_g1_i1	13.34
TR15261|c0_g1_i1	26.84
TR15271|c0_g1_i1	18.92
TR15315|c0_g1_i1	7.54
TR15317|c0_g1_i1	14.73
TR15373|c0_g1_i1	108.65
TR15413|c0_g1_i1	21.6
TR15417|c0_g2_i1	28.24
TR15497|c0_g1_i1	33.82
TR15545|c0_g1_i1	21.71
TR15594|c0_g1_i1	24.71
TR15606|c0_g1_i1	427.26
TR15642|c0_g1_i1	38.46
TR15657|c0_g1_i1	11.1
TR15815|c0_g1_i1	146.1
TR15842|c0_g1_i1	10.09
TR15843|c0_g1_i1	84.22
TR15853|c0_g1_i1	234.94
TR15895|c0_g1_i1	29.25
TR15937|c0_g1_i1	24.03
TR15957|c0_g1_i1	30.81
TR15971|c0_g1_i1	15.31
TR15978|c0_g1_i2	11.67
TR15990|c0_g1_i1	102.05
TR15995|c0_g1_i1	80.45
TR16126|c0_g1_i1	11.4
TR16136|c0_g1_i1	32.01
TR16158|c0_g1_i1	31.97
TR16162|c0_g1_i1	17.97
TR16180|c0_g1_i1	66.18
TR16191|c0_g1_i1	22.04
TR16203|c0_g1_i2	53.22
TR16221|c0_g1_i1	50.11
TR16233|c0_g1_i1	30.91
TR16235|c0_g1_i1	16.2
TR16247|c0_g1_i1	10.64
TR16250|c0_g1_i1	40.85
TR16253|c0_g1_i1	40.57
TR16272|c0_g1_i1	33.39
TR16291|c0_g1_i1	17.81
TR16347|c0_g1_i1	74.7
TR16449|c0_g1_i2	52.74
TR16480|c0_g1_i1	214.92
TR16484|c0_g1_i1	16.28
TR16551|c0_g1_i1	22.85
TR16554|c0_g1_i1	25.46
TR16561|c0_g1_i1	37.85
TR16585|c0_g1_i2	8.33
TR16587|c0_g1_i1	14.28
TR16591|c0_g1_i1	52.55
TR16604|c0_g1_i1	19.18
TR16648|c0_g2_i1	53.15
TR16651|c0_g1_i1	135.28
TR16660|c0_g1_i1	44.32
TR1667|c0_g1_i1	0.54
TR1667|c0_g1_i5	97.55
TR1667|c0_g1_i6	9.25
TR16675|c0_g1_i1	52.32
TR16704|c0_g1_i1	19.3
TR16704|c1_g1_i1	7.78
TR16735|c0_g1_i1	13.91
TR16745|c0_g1_i2	31.66
TR16747|c0_g1_i1	15.37
TR16763|c0_g1_i1	32.9
TR1691|c0_g1_i1	17.47
TR16966|c0_g1_i1	22.2
TR1699|c0_g1_i1	54.62
TR17041|c0_g1_i1	17.22
TR17048|c0_g1_i1	25.48
TR17067|c0_g1_i1	44.17
TR1707|c0_g2_i1	9.18
TR17075|c0_g1_i1	70.86
TR17100|c0_g1_i1	14.86
TR17121|c0_g1_i1	39.59
TR17141|c0_g1_i1	14.26
TR17156|c0_g1_i2	17.31
TR17169|c0_g1_i1	14.09
TR17228|c0_g1_i1	206.64
TR17246|c0_g1_i1	17.28
TR17259|c0_g1_i1	39.33
TR17269|c0_g2_i1	188.09
TR17271|c0_g1_i1	14.02
TR17273|c0_g1_i1	26.15
TR17280|c0_g1_i1	60.59
TR17313|c0_g1_i1	9.47
TR17341|c0_g1_i1	2.74
TR17341|c0_g1_i3	21.39
TR17345|c0_g1_i1	21.91
TR17350|c0_g2_i1	22.49
TR17368|c0_g1_i1	44.99
TR1738|c0_g1_i1	15.41
TR17381|c0_g1_i1	240.07
TR17405|c0_g1_i1	44.36
TR17426|c0_g1_i1	49.44
TR17449|c0_g1_i1	5.17
TR17449|c0_g1_i2	18.51
TR17454|c0_g1_i1	53.1
TR17454|c0_g2_i1	0
TR1746|c0_g2_i1	3.17
TR1746|c0_g3_i1	23.81
TR17474|c0_g1_i1	34.06
TR17487|c0_g1_i1	29.8
TR17495|c0_g1_i1	39.27
TR17550|c0_g1_i1	144.7
TR17558|c0_g1_i1	16.62
TR17581|c0_g1_i1	14.13
TR17588|c0_g1_i1	53.68
TR1759|c0_g1_i1	33.39
TR1760|c0_g1_i2	19.46
TR17602|c0_g1_i1	28.52
TR17629|c0_g1_i1	16.92
TR17644|c0_g2_i2	11.35
TR17685|c0_g1_i1	9.16
TR1772|c0_g2_i1	36.73
TR17730|c0_g1_i1	16.11
TR17739|c0_g2_i1	20.45
TR17759|c0_g1_i1	19.47
TR17767|c0_g1_i1	50.44
TR17791|c0_g1_i1	23.94
TR17801|c0_g1_i1	33.91
TR17832|c0_g1_i1	86.88
TR17862|c0_g1_i1	216.66
TR17865|c0_g1_i1	159.93
TR17866|c0_g2_i1	67.71
TR1787|c0_g1_i1	273.15
TR1788|c0_g1_i1	27.43
TR17894|c0_g1_i1	10.86
TR17900|c0_g1_i1	23.94
TR17911|c0_g1_i1	29.95
TR17935|c0_g1_i1	28.07
TR17947|c0_g1_i1	19.34
TR17955|c0_g1_i1	74.05
TR17969|c0_g1_i1	21.27
TR17992|c0_g1_i1	20.38
TR18016|c0_g1_i1	40.15
TR18016|c0_g1_i2	214.8
TR18037|c0_g1_i2	10.11
TR18046|c0_g1_i1	24.9
TR18096|c0_g1_i1	24.43
TR18104|c0_g1_i1	29.32
TR18111|c0_g1_i1	12.21
TR18118|c0_g1_i1	6.69
TR18140|c0_g1_i1	211.96
TR1816|c0_g1_i1	6.99
TR18163|c0_g1_i1	31.92
TR18175|c0_g1_i1	9.85
TR18179|c0_g1_i1	21.47
TR18189|c0_g1_i1	52.77
TR18270|c0_g1_i1	14.45
TR18273|c0_g1_i1	12.75
TR18286|c0_g1_i1	23.54
TR18288|c0_g1_i1	214.14
TR18306|c0_g1_i1	11.89
TR18322|c0_g2_i1	32.33
TR18325|c0_g1_i1	24.85
TR18351|c0_g1_i1	69.84
TR18364|c0_g1_i1	37.43
TR18366|c0_g1_i1	5.56
TR18408|c0_g1_i1	21.52
TR18414|c0_g1_i1	54.01
TR18414|c0_g3_i1	69.8
TR18417|c0_g1_i1	10.73
TR18435|c0_g1_i1	18.1
TR1849|c0_g1_i1	37.84
TR18497|c0_g1_i1	12.99
TR18522|c0_g1_i2	45.41
TR18523|c0_g1_i1	7.69
TR18527|c0_g4_i1	12.89
TR18559|c0_g1_i3	14.47
TR18579|c0_g1_i1	22.96
TR18595|c0_g1_i1	60.57
TR18608|c0_g1_i1	31.69
TR1861|c0_g1_i2	12.33
TR18620|c0_g1_i1	67.53
TR18639|c0_g1_i1	25.25
TR18677|c0_g1_i1	34.31
TR18682|c0_g1_i1	13.85
TR18687|c0_g1_i1	12.62
TR18710|c0_g1_i2	9.18
TR18723|c0_g1_i2	22.91
TR18726|c0_g1_i1	33.16
TR18764|c0_g1_i1	24.48
TR18771|c0_g1_i1	141.74
TR18784|c0_g1_i1	57.75
TR18805|c0_g1_i2	33.85
TR18807|c0_g1_i1	68.5
TR18836|c0_g1_i1	110.38
TR18839|c0_g2_i1	104.32
TR18847|c0_g1_i1	93.55
TR18848|c0_g1_i1	12.53
TR18849|c0_g1_i2	41.89
TR18888|c0_g1_i1	39.64
TR18894|c0_g1_i1	13.32
TR18896|c0_g1_i1	64.9
TR18900|c1_g1_i1	13.23
TR18914|c0_g1_i2	181.43
TR18928|c0_g1_i1	50.8
TR19006|c0_g1_i1	178.36
TR19008|c0_g1_i1	196.91
TR19026|c0_g1_i1	6.31
TR19030|c0_g1_i2	56.77
TR19036|c0_g1_i1	15.51
TR19036|c0_g2_i1	19.63
TR19040|c0_g1_i1	82.19
TR19040|c0_g1_i2	17.65
TR19040|c0_g2_i2	2.69
TR19054|c0_g1_i1	8.96
TR19059|c0_g1_i1	35.73
TR19069|c0_g1_i1	8.06
TR19108|c0_g1_i1	26.57
TR19118|c0_g1_i1	27.83
TR19122|c0_g1_i1	16.83
TR19137|c0_g1_i2	78.48
TR19140|c0_g1_i1	108.73
TR19144|c0_g1_i1	10.87
TR19149|c0_g1_i1	22.98
TR19155|c0_g1_i1	34.63
TR19175|c0_g1_i1	9.97
TR19193|c0_g1_i1	76.16
TR1922|c0_g1_i1	36.22
TR19223|c0_g1_i1	28.74
TR19229|c0_g1_i1	34.06
TR19239|c0_g1_i1	11.62
TR19242|c0_g1_i1	19.17
TR19244|c0_g1_i1	8.46
TR19254|c0_g1_i1	64.05
TR19279|c0_g1_i1	38.23
TR19288|c0_g1_i1	51.63
TR19291|c0_g1_i3	28.41
TR19302|c0_g1_i1	20.87
TR19303|c0_g1_i1	72.84
TR19360|c0_g1_i1	20.83
TR19377|c0_g1_i1	53.99
TR19383|c0_g1_i2	14.96
TR19385|c0_g1_i1	9.07
TR19389|c0_g1_i1	32.59
TR19435|c0_g1_i1	133.53
TR19438|c0_g1_i1	9.89
TR19449|c0_g1_i1	46.93
TR19470|c0_g1_i1	19.78
TR19485|c0_g1_i1	55.59
TR19486|c0_g2_i1	22.83
TR19488|c0_g1_i1	55.21
TR19498|c0_g1_i1	28.14
TR19514|c0_g1_i1	15.8
TR19514|c0_g1_i2	10.14
TR19546|c0_g2_i1	10.59
TR19553|c0_g1_i1	172.31
TR19561|c0_g1_i1	39.29
TR19573|c0_g1_i1	11.93
TR1959|c0_g1_i1	11.34
TR19591|c0_g1_i1	50.24
TR19603|c0_g2_i1	16.87
TR19613|c0_g2_i1	18.5
TR19631|c0_g2_i1	36.47
TR19637|c0_g1_i2	48.01
TR19662|c0_g1_i1	17.55
TR19685|c0_g1_i1	35.37
TR19688|c0_g2_i1	323.53
TR19716|c0_g1_i1	83.27
TR19720|c0_g1_i1	8.95
TR19730|c0_g1_i1	10.44
TR19734|c0_g1_i1	222.29
TR19748|c0_g1_i1	17.92
TR19751|c0_g2_i1	16.29
TR19773|c0_g1_i1	14.94
TR19773|c0_g1_i2	35.89
TR19835|c0_g1_i1	26.97
TR19839|c0_g1_i1	22.31
TR19861|c0_g1_i1	16.03
TR19865|c0_g1_i1	13.01
TR19875|c0_g1_i2	606.14
TR19879|c0_g1_i1	64.58
TR19890|c0_g1_i2	10.57
TR19890|c0_g1_i3	47.64
TR19890|c0_g1_i4	5.12
TR19897|c0_g1_i1	31.1
TR1990|c0_g1_i1	23.12
TR19902|c0_g1_i1	21.39
TR19903|c0_g1_i1	14.39
TR19914|c0_g1_i1	104.69
TR19914|c0_g1_i2	34.44
TR19950|c0_g2_i1	35.62
TR19961|c0_g1_i1	311.53
TR19972|c0_g1_i1	41.67
TR19981|c0_g1_i1	14.45
TR19984|c0_g1_i1	43.24
TR20014|c0_g1_i1	122.3
TR20014|c0_g1_i2	0
TR20021|c0_g1_i1	67.94
TR20022|c0_g1_i1	15.67
TR20027|c0_g1_i1	87.45
TR20032|c0_g1_i1	34.54
TR20054|c0_g1_i1	33.93
TR20059|c0_g2_i1	20.2
TR2006|c0_g1_i1	37.49
TR20060|c0_g2_i1	10.14
TR20066|c0_g1_i1	730.83
TR20091|c0_g1_i1	60.71
TR2012|c0_g2_i1	102.89
TR20124|c0_g2_i1	23.76
TR20125|c0_g1_i1	10.2
TR20127|c0_g1_i1	19.39
TR20137|c0_g1_i2	288.45
TR20144|c0_g1_i2	10.72
TR20145|c0_g1_i1	86.68
TR20160|c0_g1_i1	20.17
TR20169|c0_g1_i1	36.87
TR20199|c0_g1_i2	4.08
TR20200|c0_g1_i1	12.24
TR20238|c0_g1_i1	21.15
TR20255|c0_g1_i1	8.18
TR20263|c0_g1_i2	14.29
TR20267|c0_g1_i1	111.78
TR2027|c0_g1_i1	21.11
TR20276|c0_g1_i2	96.39
TR20277|c0_g1_i1	24.2
TR20285|c0_g1_i1	10.91
TR20294|c0_g1_i1	34.31
TR20317|c0_g1_i1	36.57
TR20327|c1_g1_i1	9.78
TR20328|c0_g1_i1	23.91
TR20337|c0_g1_i2	22.38
TR20346|c0_g1_i1	33.48
TR20347|c1_g1_i1	44.89
TR2035|c0_g1_i1	24.24
TR20363|c0_g1_i1	14.08
TR20363|c0_g1_i2	30.68
TR20366|c0_g2_i1	29.43
TR20368|c0_g1_i1	98.72
TR20371|c0_g1_i1	10.93
TR20386|c0_g1_i1	17.16
TR20401|c0_g2_i1	7.46
TR20410|c0_g1_i1	37.08
TR20413|c0_g2_i1	179.59
TR20436|c0_g1_i1	17.06
TR20442|c0_g1_i1	61.22
TR20450|c0_g1_i1	41.74
TR20465|c0_g1_i1	27.58
TR20467|c0_g2_i1	11.42
TR20471|c0_g1_i1	142.01
TR20472|c0_g1_i1	19.53
TR20472|c0_g1_i2	3.08
TR20480|c0_g1_i1	31.8
TR20497|c0_g1_i1	128.01
TR20504|c0_g1_i1	15.43
TR2051|c0_g1_i1	10.8
TR20531|c0_g1_i1	11.89
TR20532|c0_g1_i1	13.05
TR20532|c0_g1_i2	9.69
TR20532|c0_g2_i1	21.33
TR20537|c0_g1_i1	20.37
TR20541|c0_g1_i1	27.13
TR20558|c0_g2_i1	10.99
TR20559|c0_g1_i1	10.58
TR20560|c0_g2_i2	15.29
TR20565|c0_g1_i1	212.33
TR20566|c0_g1_i1	14.69
TR20597|c0_g1_i3	58.66
TR20597|c0_g1_i4	1.47
TR20613|c0_g1_i1	28.94
TR20645|c0_g1_i1	25.57
TR20664|c0_g1_i1	63.12
TR20669|c0_g1_i1	6.68
TR20673|c0_g1_i1	28.05
TR20687|c0_g1_i1	24.19
TR20689|c0_g1_i1	10.48
TR20710|c1_g1_i3	10.16
TR20710|c1_g1_i5	7.61
TR20714|c0_g1_i4	3.36
TR20726|c0_g1_i1	34.24
TR20732|c0_g1_i2	14.11
TR20733|c0_g1_i1	14.49
TR20734|c0_g1_i1	40.2
TR20737|c0_g1_i1	17.14
TR20740|c0_g1_i2	24.17
TR20758|c0_g1_i1	19.08
TR20767|c0_g1_i2	9.44
TR20773|c0_g1_i2	132.99
TR20774|c0_g1_i1	31.95
TR20779|c0_g1_i1	78.99
TR20784|c0_g1_i1	18.92
TR20787|c0_g1_i2	15.58
TR20789|c0_g1_i1	9.77
TR20791|c0_g1_i1	42.67
TR20792|c0_g1_i1	25.35
TR20796|c0_g1_i1	15.4
TR20796|c0_g1_i3	7.7
TR20806|c0_g1_i1	58.25
TR20820|c0_g1_i1	10.06
TR20839|c0_g1_i2	31.84
TR20882|c0_g2_i1	101.68
TR20885|c1_g1_i1	10.88
TR20887|c0_g1_i1	42.46
TR20903|c0_g1_i3	9.7
TR20911|c0_g1_i1	37.14
TR20913|c0_g1_i1	32.08
TR20918|c0_g1_i1	197.33
TR20919|c0_g1_i1	3.37
TR20941|c0_g1_i1	13.67
TR2095|c0_g1_i1	13.37
TR20986|c0_g1_i1	22.56
TR20986|c0_g1_i2	18.33
TR20989|c0_g1_i1	21.66
TR21007|c0_g1_i4	13.9
TR21008|c0_g1_i2	17.7
TR21009|c0_g1_i1	18.47
TR21011|c1_g1_i1	10.89
TR21023|c0_g1_i1	34.37
TR21031|c0_g1_i2	67.14
TR21042|c0_g1_i5	13.19
TR21046|c0_g1_i2	6.32
TR21050|c0_g1_i2	19.99
TR21055|c0_g1_i3	0.66
TR21055|c0_g1_i4	8.36
TR21060|c0_g1_i1	18.99
TR21074|c0_g1_i2	14.36
TR21081|c0_g1_i1	21.15
TR21083|c0_g1_i1	13.12
TR21101|c0_g1_i5	180.38
TR21104|c0_g1_i1	34.44
TR21116|c0_g1_i1	19.96
TR21126|c0_g2_i1	20
TR21129|c0_g1_i1	26.27
TR21130|c0_g1_i1	10.12
TR21130|c0_g1_i2	1.68
TR21132|c0_g1_i2	27.53
TR21140|c0_g1_i1	10.79
TR21147|c0_g2_i1	59.88
TR21148|c0_g1_i1	10.54
TR21158|c0_g1_i1	9.02
TR21169|c0_g3_i1	16.15
TR21177|c0_g1_i1	9.9
TR21178|c0_g1_i1	337.97
TR21180|c0_g2_i2	64.94
TR21190|c0_g1_i1	10.64
TR21194|c0_g1_i1	49.1
TR21195|c0_g1_i2	21.27
TR21217|c0_g1_i1	69.73
TR21223|c0_g1_i1	31.74
TR21249|c0_g1_i2	25.71
TR21261|c0_g1_i1	43.13
TR21281|c0_g1_i1	26.84
TR21282|c1_g1_i3	18.23
TR21282|c2_g1_i1	69.34
TR21288|c0_g1_i1	26.33
TR21292|c0_g1_i1	20.66
TR21294|c0_g1_i1	27.2
TR21296|c0_g1_i1	22.22
TR21299|c0_g1_i1	13.4
TR21323|c0_g1_i2	19.17
TR2133|c0_g1_i1	16.75
TR21331|c0_g1_i1	89.85
TR21342|c0_g1_i1	17.22
TR21347|c0_g1_i1	18.86
TR21376|c0_g1_i1	38.43
TR21383|c0_g2_i1	59.28
TR21385|c0_g1_i1	44.74
TR21397|c0_g1_i1	18.36
TR21406|c0_g1_i3	18.12
TR21406|c0_g1_i4	31.89
TR21410|c0_g1_i1	69.96
TR21411|c0_g1_i1	16.87
TR21413|c0_g1_i1	16.23
TR21422|c0_g1_i1	29.69
TR21433|c0_g1_i1	26.22
TR21445|c0_g1_i1	21.05
TR2145|c0_g1_i1	18.84
TR21450|c0_g1_i1	16.57
TR21454|c0_g1_i1	63.43
TR21455|c0_g1_i1	43.53
TR21456|c0_g1_i1	228.71
TR21464|c0_g1_i1	45.25
TR21468|c0_g1_i1	98.98
TR2149|c0_g1_i1	10.91
TR21490|c1_g1_i1	38.98
TR21496|c1_g1_i1	6.84
TR21496|c1_g1_i2	2.74
TR21497|c0_g1_i2	28.23
TR21501|c0_g1_i1	33.53
TR21513|c0_g1_i1	23.69
TR21517|c0_g1_i1	3.84
TR21517|c0_g2_i1	34.53
TR21522|c0_g2_i1	33.12
TR21532|c0_g1_i1	428.36
TR2157|c0_g1_i3	0
TR2157|c0_g3_i1	26.89
TR2158|c0_g1_i2	3.23
TR2159|c0_g1_i1	24.65
TR2160|c0_g1_i1	10.36
TR2160|c0_g1_i2	17.95
TR21606|c0_g1_i1	39.3
TR2161|c0_g8_i1	121.57
TR21614|c0_g1_i1	25.64
TR2163|c0_g1_i1	48.9
TR2163|c0_g1_i2	0
TR2163|c0_g1_i3	17.6
TR2163|c0_g3_i1	22.38
TR2163|c0_g3_i2	12.62
TR21630|c0_g1_i2	31.71
TR21633|c0_g1_i1	18.56
TR21645|c0_g1_i1	14.08
TR21648|c0_g1_i1	25.12
TR2165|c0_g1_i1	28.83
TR2165|c0_g1_i2	10.56
TR21651|c0_g1_i2	23.32
TR21658|c0_g1_i1	23.66
TR2167|c0_g1_i4	7.94
TR21671|c0_g1_i1	11.79
TR21678|c0_g1_i1	35.07
TR21679|c1_g2_i1	19.66
TR21681|c0_g1_i1	17.41
TR2169|c0_g3_i1	30.68
TR2169|c0_g4_i1	13.69
TR21693|c0_g1_i2	16.65
TR21697|c0_g1_i1	167.26
TR21699|c0_g1_i1	98.29
TR2170|c1_g3_i1	34.7
TR21701|c0_g1_i1	13.56
TR21701|c0_g2_i1	0
TR21702|c0_g1_i1	12.41
TR2171|c0_g1_i1	205.42
TR2171|c0_g1_i2	227.02
TR2171|c0_g2_i2	204.7
TR2171|c0_g2_i4	174.1
TR2171|c0_g2_i6	375.25
TR21714|c0_g1_i2	9.79
TR21719|c1_g1_i2	14.14
TR21723|c0_g1_i1	5.36
TR21724|c0_g1_i2	44.62
TR21737|c0_g1_i1	38.68
TR21743|c0_g1_i1	16.35
TR21746|c0_g1_i1	20.45
TR21750|c0_g1_i1	12.38
TR21751|c0_g1_i1	21.68
TR21755|c0_g1_i4	18.38
TR21756|c0_g1_i1	20.02
TR2176|c0_g1_i1	8.01
TR2176|c0_g1_i5	9.1
TR2176|c0_g1_i8	0.94
TR2176|c0_g4_i1	24.74
TR21762|c0_g1_i1	19.16
TR21765|c0_g1_i1	18.41
TR2177|c0_g1_i2	10.74
TR21776|c0_g1_i1	2.4
TR21776|c0_g1_i3	14.85
TR21776|c0_g2_i1	21.46
TR2178|c4_g2_i1	5.4
TR2178|c5_g1_i2	11.9
TR21781|c0_g1_i1	42.7
TR21782|c0_g1_i1	17.48
TR2179|c0_g1_i1	119.63
TR2179|c0_g1_i3	52.17
TR21794|c0_g1_i2	10.94
TR2180|c0_g1_i3	13.36
TR2180|c0_g1_i8	23.34
TR21800|c0_g1_i1	5.11
TR2181|c0_g2_i1	10.51
TR21814|c0_g1_i1	19.33
TR2182|c0_g1_i1	3.69
TR21823|c0_g1_i1	30.57
TR21844|c0_g1_i1	26.6
TR21844|c0_g1_i2	56.8
TR21846|c0_g1_i1	8.2
TR21846|c0_g2_i1	20.79
TR21846|c0_g3_i1	9.56
TR21846|c0_g4_i1	50.99
TR21857|c0_g1_i1	22.94
TR21860|c0_g1_i1	26.27
TR21870|c0_g1_i1	13.84
TR21873|c0_g1_i1	14.42
TR2188|c0_g1_i5	80.89
TR2188|c0_g1_i6	5
TR2188|c0_g5_i1	112.48
TR21889|c0_g1_i1	20.2
TR2189|c0_g1_i1	164.22
TR21896|c0_g1_i1	18.1
TR21902|c0_g1_i1	10.32
TR2192|c0_g2_i1	47.52
TR2192|c0_g2_i3	53.14
TR2192|c0_g2_i4	25.59
TR2192|c0_g2_i6	136.07
TR21923|c0_g2_i1	6.79
TR21923|c0_g2_i2	32.19
TR2193|c0_g1_i2	20.59
TR21937|c0_g1_i1	24.62
TR2194|c0_g1_i2	17.2
TR2194|c0_g1_i3	39.47
TR21940|c0_g1_i2	17.67
TR21946|c0_g1_i1	33.58
TR21949|c0_g1_i1	40.44
TR21949|c0_g3_i1	39.54
TR21949|c0_g3_i2	28.74
TR2195|c0_g1_i3	63.28
TR2195|c0_g1_i4	11.56
TR2195|c0_g1_i8	29.93
TR2195|c0_g1_i9	19.71
TR21956|c0_g1_i1	32.7
TR21959|c0_g1_i1	19.8
TR2196|c0_g1_i1	39.3
TR2197|c0_g1_i1	74.59
TR2197|c0_g2_i2	26.28
TR2197|c0_g2_i4	13.33
TR21986|c0_g1_i1	15.54
TR22002|c1_g1_i1	12.56
TR22002|c1_g1_i5	45.43
TR22009|c0_g1_i1	26.28
TR2201|c0_g1_i1	19.76
TR2201|c0_g3_i1	28.56
TR2201|c0_g3_i2	17.87
TR22014|c0_g1_i1	21.16
TR22023|c0_g1_i1	46.65
TR22023|c0_g1_i3	18.37
TR22025|c0_g1_i1	21.26
TR22036|c0_g2_i1	28.03
TR22051|c0_g1_i1	19.25
TR2207|c0_g1_i1	2.27
TR2207|c0_g1_i2	13.28
TR2207|c0_g1_i7	2.91
TR2208|c1_g1_i2	9.16
TR22084|c0_g1_i1	101.74
TR22084|c0_g1_i2	34.27
TR2209|c0_g3_i2	23.37
TR2209|c0_g3_i3	5.71
TR22093|c0_g1_i1	30.84
TR22095|c0_g1_i1	18.1
TR22098|c0_g1_i2	21
TR22110|c0_g3_i1	24.06
TR22115|c0_g1_i1	154.34
TR2212|c1_g1_i1	49.04
TR2212|c1_g1_i2	13.67
TR2212|c1_g2_i1	26.38
TR2212|c1_g2_i2	19.36
TR22122|c0_g1_i1	9.09
TR22128|c0_g1_i3	6.41
TR2213|c0_g1_i1	72.01
TR22134|c0_g1_i2	10.1
TR22136|c0_g1_i1	25.11
TR2214|c1_g1_i1	25.04
TR2214|c2_g1_i1	231.51
TR2214|c2_g1_i2	84.48
TR2214|c3_g2_i1	268.88
TR2214|c3_g4_i1	32.48
TR2214|c3_g9_i1	198.18
TR22158|c0_g1_i1	18.95
TR2216|c1_g1_i1	36.91
TR2216|c1_g2_i1	47.95
TR2216|c1_g5_i1	0
TR22166|c0_g1_i2	10.38
TR2217|c0_g1_i2	47.01
TR2217|c1_g1_i2	0
TR2217|c1_g2_i1	30.28
TR22171|c1_g4_i1	313.77
TR2218|c1_g2_i1	15.98
TR22180|c0_g1_i1	15
TR22194|c0_g1_i1	15.18
TR22196|c0_g1_i1	36.76
TR22205|c0_g1_i1	29.95
TR2221|c0_g1_i2	39.76
TR22215|c0_g1_i1	19.34
TR22223|c0_g1_i2	10.79
TR22225|c0_g1_i1	52.82
TR2223|c0_g1_i3	10.43
TR22245|c0_g1_i1	21.73
TR2225|c1_g11_i1	198.25
TR2225|c1_g11_i10	23.18
TR2225|c1_g11_i2	113.24
TR2225|c1_g11_i5	85.65
TR2225|c1_g11_i8	33.13
TR2225|c1_g12_i1	55.4
TR22251|c0_g1_i1	24.68
TR22259|c0_g1_i1	23.99
TR22259|c0_g1_i2	12.32
TR2226|c0_g1_i1	46.7
TR2228|c0_g2_i2	7.64
TR22282|c0_g1_i1	35.36
TR22286|c0_g1_i1	21.65
TR22292|c0_g1_i1	28.47
TR22308|c0_g1_i1	109.77
TR2231|c0_g1_i1	20.33
TR22310|c0_g1_i1	52.03
TR2232|c0_g1_i1	17.67
TR22333|c0_g1_i1	67.4
TR22337|c0_g1_i1	23.29
TR2236|c0_g1_i1	16.75
TR22370|c0_g1_i1	18.69
TR22379|c0_g1_i1	164.23
TR2238|c0_g1_i1	8.06
TR2238|c0_g1_i4	3.34
TR22386|c0_g1_i1	42.05
TR2239|c0_g3_i1	111.05
TR2239|c0_g3_i3	98.25
TR2239|c0_g3_i4	0
TR22390|c0_g1_i1	11.94
TR22408|c0_g1_i1	11.76
TR22412|c0_g1_i1	35.7
TR22419|c0_g1_i1	5.43
TR22423|c0_g1_i1	35.17
TR2243|c0_g1_i1	2.58
TR2243|c0_g1_i2	30.22
TR2243|c0_g2_i1	15.06
TR22431|c0_g1_i1	18.22
TR22432|c0_g1_i1	39.29
TR22435|c0_g1_i1	11.16
TR22438|c0_g1_i1	15.11
TR2244|c1_g1_i6	171.42
TR2244|c1_g1_i7	170.42
TR2244|c1_g1_i8	29.99
TR22440|c0_g1_i2	26.19
TR22446|c0_g2_i1	22.8
TR22447|c0_g1_i1	32.26
TR2245|c4_g1_i1	10.62
TR2246|c0_g1_i1	34.43
TR2247|c0_g1_i1	12.83
TR2248|c0_g1_i2	26.38
TR2248|c0_g1_i5	19.88
TR2248|c1_g3_i1	69.52
TR22493|c0_g1_i1	8.62
TR2250|c2_g2_i2	18.31
TR2250|c3_g1_i1	83.81
TR2250|c3_g1_i2	83.83
TR2253|c1_g2_i1	107.31
TR22531|c0_g1_i1	13.25
TR22536|c0_g1_i1	31.01
TR2254|c0_g1_i1	19.19
TR2254|c0_g1_i10	24.03
TR2255|c10_g1_i1	741.34
TR2255|c10_g3_i3	0.86
TR2255|c10_g4_i1	152.14
TR22554|c0_g1_i1	21.88
TR2256|c0_g1_i2	81.45
TR2256|c1_g2_i2	7.92
TR2256|c2_g1_i1	48.52
TR2256|c3_g1_i1	37.16
TR2256|c3_g1_i2	133.64
TR2256|c3_g1_i3	90.33
TR2256|c3_g1_i9	20.77
TR22560|c0_g1_i1	8.07
TR22564|c0_g2_i1	13
TR22581|c0_g1_i2	9.43
TR22583|c1_g1_i1	16.33
TR2259|c1_g1_i1	24.2
TR2259|c1_g1_i3	3.18
TR22590|c0_g1_i1	39.18
TR22599|c0_g1_i1	20.11
TR22599|c0_g2_i1	21.81
TR2260|c0_g2_i1	302.82
TR2260|c0_g3_i1	415.47
TR2260|c0_g3_i2	152.32
TR22601|c0_g1_i1	90.92
TR22608|c1_g1_i3	13.95
TR2261|c0_g1_i1	40.74
TR2261|c0_g2_i1	60.78
TR2261|c0_g2_i3	150.83
TR2261|c0_g3_i2	137.58
TR2261|c0_g4_i1	184.28
TR2261|c0_g5_i1	30.13
TR22619|c0_g1_i1	24.04
TR2262|c0_g1_i1	29.41
TR2262|c0_g7_i1	4.02
TR2263|c1_g1_i8	12.43
TR22639|c0_g1_i1	26.82
TR2264|c0_g1_i2	17.16
TR2264|c0_g1_i4	5.29
TR2264|c0_g2_i1	12.8
TR2265|c0_g4_i1	9.26
TR22658|c0_g1_i1	51.69
TR22658|c0_g2_i2	72.47
TR2266|c0_g1_i1	58.35
TR2266|c0_g1_i2	261.24
TR2266|c0_g1_i3	281.82
TR22661|c1_g1_i2	158.08
TR22678|c0_g1_i2	19.3
TR22687|c0_g1_i1	12.83
TR22689|c0_g1_i1	14.47
TR22689|c0_g3_i1	9.64
TR22709|c0_g1_i1	23.97
TR22716|c0_g1_i1	13.43
TR22724|c0_g1_i1	46.41
TR22729|c0_g1_i1	18.05
TR2273|c1_g1_i2	12.34
TR2273|c1_g1_i3	186.23
TR22739|c0_g1_i1	118.52
TR22739|c0_g2_i1	34.05
TR22739|c0_g3_i1	78.53
TR22739|c0_g3_i2	248.69
TR2274|c0_g1_i3	9.46
TR22746|c0_g1_i3	27.82
TR22747|c0_g1_i2	13.37
TR2277|c0_g1_i1	8.87
TR2277|c0_g1_i2	5.57
TR2277|c0_g1_i3	5.45
TR22774|c0_g1_i2	148.58
TR22780|c0_g1_i1	22.17
TR22789|c0_g1_i1	25.14
TR2279|c0_g3_i2	12.43
TR22790|c0_g1_i2	20.19
TR22792|c0_g1_i1	85.71
TR22799|c0_g1_i1	10.76
TR2280|c0_g1_i1	110.95
TR2280|c0_g4_i2	346.01
TR22803|c0_g1_i1	10.49
TR22805|c0_g1_i1	200.4
TR22817|c0_g2_i1	47.46
TR2282|c0_g1_i1	14.28
TR22821|c0_g1_i2	6.21
TR22823|c0_g1_i2	26.83
TR22829|c0_g1_i1	38.7
TR2283|c0_g1_i1	69.09
TR2283|c0_g5_i1	140.13
TR22835|c0_g1_i1	12.5
TR2284|c0_g3_i1	14.09
TR2284|c0_g5_i1	7.87
TR22846|c0_g1_i1	43.85
TR22846|c0_g1_i2	1.12
TR22855|c0_g1_i2	7.42
TR22859|c0_g1_i1	8.08
TR2286|c0_g1_i3	7.57
TR22863|c0_g1_i1	218.16
TR22865|c0_g1_i1	37.04
TR22869|c0_g1_i1	15.06
TR22878|c0_g1_i1	16.22
TR22885|c0_g1_i1	17.16
TR22885|c0_g2_i1	0
TR22894|c0_g1_i1	21.09
TR22894|c0_g2_i1	6.31
TR22896|c0_g1_i3	14.43
TR2290|c0_g2_i4	20.83
TR22907|c0_g1_i1	10.14
TR22910|c0_g1_i1	23.54
TR22912|c0_g1_i1	32.51
TR22919|c0_g1_i1	13.17
TR22919|c0_g1_i2	7.48
TR22923|c0_g1_i1	25.68
TR22926|c0_g1_i1	53.15
TR22928|c0_g1_i1	12.21
TR2293|c0_g1_i1	3.63
TR2293|c0_g2_i1	17.8
TR2293|c0_g2_i2	13.02
TR22937|c0_g1_i1	15.15
TR2294|c0_g3_i2	45.04
TR2294|c0_g3_i3	24.64
TR2294|c0_g3_i4	73.95
TR2294|c0_g4_i1	6.66
TR2294|c0_g4_i3	14.27
TR2294|c0_g5_i1	91.72
TR2294|c0_g7_i2	7.45
TR22942|c0_g2_i1	9.6
TR22945|c0_g1_i1	20.93
TR22950|c0_g1_i1	18.92
TR2296|c0_g3_i1	19.85
TR2296|c0_g4_i3	18.59
TR2297|c0_g1_i2	13.33
TR2297|c0_g2_i2	9.8
TR2297|c0_g3_i1	82.41
TR2297|c0_g3_i2	50.97
TR22975|c0_g1_i1	25.34
TR22979|c0_g1_i1	23.38
TR22981|c0_g1_i1	15.43
TR22982|c0_g1_i1	7.32
TR2299|c0_g1_i1	95.36
TR22993|c0_g1_i1	36.58
TR22995|c0_g1_i2	13.01
TR22995|c0_g1_i3	11.77
TR22996|c0_g1_i1	9.93
TR23003|c0_g1_i1	184.15
TR23003|c0_g1_i2	82.95
TR23004|c0_g1_i1	40.25
TR23008|c0_g1_i1	128.3
TR23010|c0_g1_i1	17.63
TR23026|c0_g1_i1	25.71
TR2303|c0_g1_i1	25.39
TR2303|c1_g3_i1	23.92
TR2303|c1_g3_i10	17.36
TR2303|c1_g3_i2	11.99
TR2303|c1_g3_i3	45.82
TR2303|c1_g3_i4	9.93
TR2303|c1_g3_i5	88.99
TR2303|c1_g3_i8	98.57
TR23035|c0_g1_i1	89.44
TR2304|c0_g1_i1	21.66
TR2304|c0_g1_i3	14.44
TR23041|c0_g1_i1	14.39
TR23042|c0_g2_i1	21.34
TR23044|c0_g1_i3	27.27
TR23047|c0_g2_i1	9.51
TR23048|c0_g1_i1	25.97
TR23052|c0_g2_i1	39.42
TR23059|c0_g1_i3	12.24
TR2306|c0_g3_i1	10.93
TR23066|c0_g1_i1	26.4
TR2307|c0_g1_i1	80.33
TR23080|c0_g1_i1	10.82
TR23080|c0_g2_i1	13.57
TR23088|c0_g1_i3	277.32
TR23088|c0_g2_i1	780.85
TR2309|c0_g1_i3	4.43
TR23092|c0_g1_i1	8.09
TR23095|c0_g1_i1	66.12
TR23099|c0_g1_i1	9.66
TR2310|c0_g1_i3	9.18
TR23102|c0_g1_i1	27.3
TR23104|c0_g1_i1	7.08
TR23105|c1_g2_i3	48.86
TR23106|c0_g1_i1	36.75
TR23106|c1_g1_i1	33.05
TR2311|c0_g1_i1	7.62
TR2312|c0_g4_i10	0
TR2312|c0_g4_i5	34.41
TR23121|c0_g1_i1	61.3
TR2313|c0_g1_i1	13.35
TR2313|c0_g1_i2	4.27
TR23131|c0_g1_i1	33.73
TR23132|c0_g2_i1	17.68
TR23134|c1_g1_i1	4.23
TR23135|c0_g1_i2	13.74
TR23138|c0_g1_i1	49.25
TR2314|c0_g1_i2	7.51
TR23144|c0_g1_i4	1.95
TR23144|c0_g1_i5	2.14
TR23151|c0_g1_i1	13.65
TR23152|c0_g1_i2	15
TR2316|c0_g1_i1	97.39
TR2316|c0_g1_i2	66.93
TR2316|c0_g1_i4	49.46
TR23163|c0_g3_i1	21.62
TR23163|c0_g4_i1	0
TR2317|c1_g1_i1	633.02
TR23174|c0_g1_i1	79.47
TR23174|c0_g2_i1	22.54
TR2318|c0_g1_i10	41.38
TR2318|c0_g1_i6	37.61
TR23182|c0_g2_i2	112.3
TR23182|c0_g2_i3	9.02
TR2320|c0_g1_i1	37.25
TR2320|c0_g5_i1	25.3
TR2320|c0_g5_i2	28.04
TR23204|c0_g1_i1	49.51
TR2321|c0_g1_i1	117.5
TR2321|c1_g1_i2	78.05
TR23211|c1_g1_i1	16.24
TR23211|c1_g1_i2	18.78
TR23222|c0_g1_i1	19.95
TR2323|c0_g1_i2	3.36
TR23231|c0_g1_i1	41.33
TR2324|c0_g1_i1	22.79
TR2324|c0_g1_i2	10.48
TR23247|c0_g3_i2	165.34
TR23249|c0_g1_i2	18.9
TR23249|c0_g1_i3	68.54
TR2325|c0_g1_i2	17.04
TR23253|c0_g1_i1	24.15
TR23257|c0_g1_i1	20.45
TR23258|c0_g1_i1	28.28
TR2326|c0_g1_i2	23.9
TR2326|c0_g1_i6	29.12
TR2326|c0_g1_i8	0.44
TR2327|c0_g2_i1	11.23
TR2327|c0_g4_i1	38.57
TR23274|c0_g1_i2	17.96
TR23278|c0_g1_i1	22.37
TR23279|c0_g1_i1	9.5
TR2328|c0_g1_i1	10.58
TR2328|c0_g1_i4	11.08
TR23282|c0_g1_i1	23.34
TR23283|c0_g1_i1	0.02
TR23283|c0_g1_i2	11.21
TR23285|c0_g1_i2	19.91
TR2329|c0_g2_i1	173.7
TR2329|c0_g3_i3	118.15
TR2329|c0_g3_i6	156.83
TR23294|c0_g1_i1	13.82
TR23296|c0_g1_i1	19.49
TR23299|c0_g1_i1	8.36
TR2330|c0_g1_i2	9.31
TR23300|c0_g1_i1	54.12
TR23302|c0_g1_i1	10.29
TR23304|c0_g1_i1	11.77
TR23316|c0_g1_i1	79.75
TR23317|c0_g2_i1	17.37
TR2332|c0_g1_i3	5.68
TR23326|c0_g1_i1	62.93
TR23329|c0_g1_i1	112
TR2333|c0_g1_i1	25.8
TR23335|c0_g1_i1	25.25
TR23337|c0_g1_i1	0
TR23337|c0_g2_i1	73.73
TR23348|c0_g1_i2	0.57
TR2335|c0_g1_i1	192.52
TR2335|c0_g2_i1	12.74
TR2335|c0_g4_i1	126.23
TR2336|c1_g1_i6	6.47
TR23374|c0_g1_i1	15.58
TR23376|c0_g3_i1	9.83
TR23376|c0_g4_i1	12.36
TR23379|c1_g1_i1	87.1
TR2338|c0_g1_i1	23.14
TR23382|c0_g1_i1	26.85
TR23384|c0_g1_i1	16.36
TR23395|c0_g1_i1	52.5
TR2340|c0_g1_i5	73.59
TR2340|c0_g1_i8	8.27
TR23408|c0_g1_i1	7.71
TR23408|c0_g1_i2	3.03
TR23408|c0_g1_i3	7.15
TR2341|c0_g1_i1	41.82
TR23413|c0_g1_i1	26.12
TR23415|c0_g1_i2	13.91
TR23426|c0_g1_i1	53.41
TR23426|c0_g2_i1	14.94
TR2343|c0_g2_i1	47.09
TR23439|c0_g1_i1	34.5
TR23442|c0_g1_i1	26.78
TR23446|c0_g1_i1	9.6
TR23447|c1_g1_i2	212.42
TR23447|c1_g1_i3	47.58
TR23448|c0_g1_i1	9.87
TR23450|c0_g1_i2	16.31
TR23453|c0_g1_i1	10.16
TR23454|c0_g2_i1	22.46
TR23456|c0_g1_i1	17.49
TR2346|c2_g2_i1	78.63
TR2346|c2_g3_i2	143.75
TR2346|c2_g3_i3	61.46
TR2346|c2_g3_i5	35.38
TR2346|c2_g3_i6	126.96
TR2346|c2_g3_i7	82.4
TR23462|c0_g1_i1	43.15
TR23463|c0_g1_i1	9.52
TR23469|c0_g1_i1	32.22
TR23473|c0_g1_i1	58.85
TR23476|c0_g1_i1	11.18
TR2348|c0_g1_i4	50.42
TR2348|c0_g1_i6	14.19
TR23480|c0_g1_i1	22.91
TR23488|c0_g2_i1	30.62
TR23489|c0_g1_i2	9.46
TR23489|c0_g1_i3	24.33
TR2349|c0_g1_i1	0
TR2349|c1_g1_i2	7.63
TR2349|c1_g1_i6	16.93
TR2349|c1_g1_i9	48.98
TR23491|c0_g1_i1	46.43
TR23491|c1_g1_i1	91.52
TR2350|c0_g2_i1	70.55
TR2350|c0_g2_i4	20.24
TR23503|c0_g1_i1	24.05
TR23503|c0_g1_i2	23.22
TR23503|c0_g2_i1	14.13
TR23508|c0_g2_i1	11.28
TR2351|c0_g1_i1	12.34
TR2351|c1_g1_i1	3.15
TR23510|c0_g1_i2	26.73
TR23511|c0_g2_i1	40.11
TR23512|c0_g1_i2	25.48
TR23516|c0_g1_i1	12.51
TR23519|c1_g1_i1	47.54
TR2352|c0_g1_i2	5.43
TR23520|c0_g1_i1	8.91
TR23525|c0_g1_i1	8.36
TR23530|c0_g1_i1	18.75
TR23533|c0_g1_i15	0
TR23533|c0_g1_i3	2.06
TR23533|c0_g1_i4	1.04
TR23533|c0_g1_i7	1.34
TR23533|c0_g1_i9	5.08
TR23539|c1_g1_i1	38.25
TR2354|c0_g1_i2	5.98
TR23545|c0_g2_i1	33.95
TR23547|c0_g1_i1	13.09
TR23563|c0_g1_i1	9.06
TR23563|c0_g1_i3	8.17
TR23566|c0_g1_i1	89.56
TR23584|c0_g1_i1	14.29
TR2359|c0_g3_i1	6.62
TR23595|c0_g1_i1	24.66
TR23596|c0_g1_i1	14.05
TR23598|c0_g1_i1	31.05
TR2360|c0_g1_i11	10.26
TR2360|c0_g1_i8	5.57
TR23600|c0_g1_i2	12.9
TR23601|c0_g1_i1	30.93
TR23601|c0_g2_i1	28.7
TR23609|c0_g1_i2	27.32
TR23609|c0_g2_i1	24.99
TR2361|c2_g1_i1	0
TR2361|c2_g1_i2	0
TR2361|c2_g1_i7	19.31
TR23610|c0_g1_i1	8.69
TR23619|c0_g1_i1	29.66
TR2362|c0_g2_i1	8.43
TR2362|c0_g2_i3	6.98
TR23621|c0_g1_i1	57.58
TR23627|c0_g1_i1	10.38
TR2363|c1_g1_i4	12.21
TR23638|c0_g1_i1	101.46
TR23644|c0_g3_i1	43.83
TR23657|c0_g1_i1	9.62
TR23660|c0_g2_i1	6.72
TR23660|c0_g3_i1	8.03
TR23664|c0_g1_i1	15.12
TR2367|c0_g1_i1	9.45
TR2368|c0_g1_i1	281.95
TR23681|c0_g1_i1	34.84
TR23682|c1_g1_i2	14.83
TR23685|c0_g1_i1	21.15
TR2369|c0_g5_i1	72.49
TR23705|c0_g1_i1	22.44
TR23708|c0_g1_i1	36.66
TR23719|c0_g3_i1	43.42
TR2372|c0_g1_i8	6.5
TR23720|c0_g1_i1	19.76
TR23721|c0_g1_i1	38.13
TR23728|c0_g1_i1	169.94
TR23728|c0_g2_i1	206.73
TR2373|c0_g1_i1	23.39
TR2373|c0_g1_i2	53.37
TR23730|c0_g2_i1	43.89
TR23743|c0_g1_i1	16.72
TR23758|c0_g1_i1	7.33
TR23761|c0_g1_i2	7.51
TR23762|c0_g1_i1	19.99
TR23768|c0_g1_i1	26.36
TR23768|c0_g2_i1	12.08
TR23768|c0_g3_i1	26.88
TR23770|c0_g1_i1	78.01
TR23770|c0_g3_i1	30.44
TR23773|c0_g1_i1	10.38
TR23778|c0_g1_i2	101.51
TR2378|c0_g1_i5	8.86
TR23783|c0_g1_i1	79.38
TR23786|c1_g1_i1	13.1
TR23786|c1_g1_i2	60.31
TR23786|c1_g2_i1	19.21
TR23787|c1_g1_i1	18.87
TR23787|c1_g1_i2	42.2
TR23787|c1_g1_i3	23.35
TR23792|c0_g1_i1	38.49
TR2381|c0_g1_i1	18.29
TR2381|c0_g1_i2	4.02
TR23811|c0_g2_i1	6.48
TR23814|c0_g1_i3	7.35
TR2382|c0_g1_i1	44.58
TR2382|c0_g1_i2	108.55
TR23821|c0_g1_i1	6.77
TR23822|c0_g1_i1	11.57
TR23823|c0_g1_i1	1.64
TR2383|c0_g1_i1	1296.74
TR2383|c0_g3_i1	123
TR2383|c0_g5_i1	297.29
TR2383|c0_g6_i1	353.25
TR23832|c2_g1_i1	4.21
TR23833|c0_g1_i1	33.04
TR23833|c0_g2_i1	13.7
TR23833|c0_g2_i2	30.18
TR2384|c0_g3_i5	18.6
TR2385|c0_g1_i1	0
TR2385|c0_g1_i4	32.5
TR2385|c0_g2_i1	17.51
TR23853|c0_g1_i2	13.07
TR23854|c0_g3_i2	17.02
TR2386|c0_g1_i2	6.77
TR23862|c0_g1_i2	286.01
TR23862|c0_g2_i1	161.94
TR23863|c0_g1_i2	8.42
TR2387|c0_g1_i1	8.39
TR23871|c0_g2_i1	16.83
TR23872|c0_g1_i2	5.22
TR2389|c0_g1_i1	31.86
TR23898|c0_g1_i3	3.77
TR2390|c0_g1_i3	10.12
TR2390|c0_g1_i4	9.18
TR23904|c0_g1_i2	12.67
TR23910|c0_g1_i1	97.2
TR2392|c0_g2_i1	20.7
TR23924|c0_g1_i1	11.66
TR23928|c0_g1_i2	2.12
TR23928|c0_g1_i6	5.87
TR2393|c0_g1_i1	64.98
TR2393|c0_g1_i2	126.76
TR23931|c0_g1_i1	34.74
TR23935|c0_g1_i1	96.46
TR23938|c0_g1_i2	19.48
TR2394|c0_g2_i10	8.03
TR23940|c0_g1_i1	11.05
TR23947|c0_g1_i1	18.04
TR23947|c0_g3_i2	18.78
TR23951|c0_g1_i1	17.9
TR2396|c0_g1_i1	7.97
TR2396|c0_g1_i4	9.02
TR23965|c0_g1_i1	7.11
TR23969|c1_g1_i1	49.39
TR2397|c0_g1_i2	39.24
TR2397|c0_g1_i3	64.72
TR23971|c0_g1_i1	15.44
TR23972|c0_g1_i1	15.95
TR23973|c0_g1_i1	31.13
TR2398|c0_g1_i1	153.6
TR2398|c0_g1_i2	157.22
TR2398|c0_g1_i3	126.48
TR23983|c0_g1_i2	10.78
TR2399|c0_g1_i2	146.81
TR2399|c0_g1_i3	31.86
TR23990|c0_g1_i2	6.23
TR23996|c0_g1_i2	12.9
TR23997|c0_g1_i1	9.18
TR23998|c0_g1_i2	18.1
TR24003|c0_g1_i1	31.2
TR24004|c0_g1_i1	14.95
TR24005|c0_g1_i1	11.99
TR24008|c0_g1_i2	8.69
TR2401|c0_g1_i2	37.06
TR2401|c0_g2_i1	26.83
TR2401|c0_g3_i2	60.02
TR2401|c0_g3_i3	39.93
TR24014|c0_g1_i1	49.13
TR24016|c0_g1_i1	6.25
TR24021|c1_g1_i1	6.83
TR24033|c0_g1_i1	7.42
TR24034|c0_g1_i1	164.8
TR24035|c1_g2_i2	12.73
TR2404|c0_g1_i1	35.74
TR24046|c0_g1_i1	29.86
TR24051|c0_g1_i1	29.89
TR24054|c0_g1_i1	22.46
TR24065|c0_g1_i1	16.16
TR2407|c0_g1_i2	3.6
TR24070|c0_g1_i1	14.31
TR24075|c0_g1_i2	12.74
TR2408|c0_g1_i11	2.65
TR2408|c0_g1_i5	39.08
TR2408|c0_g1_i6	32.66
TR24086|c0_g1_i1	11.04
TR24088|c0_g1_i1	33.06
TR2409|c0_g4_i2	21.09
TR24093|c0_g1_i1	14.03
TR24099|c0_g1_i1	15.48
TR2410|c0_g1_i2	23.02
TR2410|c0_g1_i3	27.67
TR24115|c0_g1_i1	5.41
TR24121|c0_g1_i1	38.25
TR24124|c0_g1_i1	22.51
TR24124|c0_g1_i2	23.62
TR24127|c0_g1_i1	6.74
TR2413|c0_g1_i2	72.09
TR2413|c0_g6_i1	62.24
TR2413|c0_g7_i1	13.34
TR24130|c0_g2_i1	17.26
TR24130|c0_g2_i3	6.07
TR24132|c0_g1_i1	16.42
TR24134|c0_g1_i3	6.74
TR2414|c0_g1_i1	96.74
TR2414|c0_g1_i2	30.57
TR2414|c0_g2_i1	166.43
TR2414|c0_g2_i2	148.52
TR24140|c0_g1_i1	142.72
TR24143|c0_g1_i1	54.84
TR2415|c4_g1_i1	41.77
TR2415|c4_g2_i1	51.48
TR24150|c0_g1_i2	6.45
TR24155|c0_g1_i1	25.19
TR24158|c0_g1_i1	9.16
TR2416|c0_g1_i1	24.86
TR2416|c0_g2_i1	42.56
TR2416|c0_g5_i1	81.25
TR2416|c0_g5_i2	26.9
TR24161|c0_g1_i1	7.53
TR24164|c0_g1_i1	9.49
TR24165|c0_g1_i1	88.94
TR2417|c0_g1_i2	9.37
TR24176|c1_g2_i2	10.06
TR24177|c3_g1_i1	51.56
TR24180|c0_g1_i1	876.56
TR24180|c2_g1_i1	89.88
TR24180|c2_g1_i2	124.2
TR24180|c2_g2_i1	26.54
TR24188|c0_g1_i1	33.17
TR24199|c0_g1_i1	17.06
TR24202|c1_g1_i2	106.55
TR24204|c0_g1_i1	15.54
TR24205|c0_g1_i1	10.79
TR24206|c0_g1_i1	48.34
TR24207|c0_g1_i1	30.58
TR24211|c0_g2_i1	29.7
TR24211|c0_g2_i3	9.33
TR24211|c0_g2_i4	6.63
TR24211|c0_g4_i1	10.82
TR24211|c0_g5_i1	4.76
TR24214|c0_g1_i1	16.22
TR24221|c0_g1_i3	10.31
TR2424|c0_g1_i1	20.54
TR2424|c0_g1_i4	4.97
TR2424|c0_g1_i5	0
TR2425|c0_g2_i2	15.61
TR2425|c0_g2_i3	40.66
TR2425|c0_g2_i7	0
TR2425|c0_g3_i2	79.39
TR24252|c1_g1_i1	176.16
TR2426|c1_g1_i1	15.36
TR2426|c1_g1_i2	1.4
TR24262|c0_g1_i2	153.94
TR24264|c0_g1_i1	5.04
TR24269|c0_g1_i1	16.91
TR2427|c0_g1_i1	33.52
TR24270|c0_g1_i1	22.93
TR24272|c0_g1_i1	14.39
TR24278|c0_g1_i1	6.25
TR2428|c0_g1_i1	17.12
TR2428|c0_g2_i2	101.77
TR2428|c0_g3_i1	6.44
TR24286|c0_g1_i1	23.47
TR24286|c0_g2_i1	16.07
TR24288|c0_g1_i1	5.88
TR2429|c0_g2_i1	67.59
TR2429|c0_g2_i3	274.16
TR24290|c0_g1_i3	44.85
TR24292|c0_g1_i1	17.84
TR24293|c0_g1_i1	6.18
TR24293|c0_g1_i2	3.16
TR24299|c0_g2_i1	22.46
TR2430|c0_g1_i2	42.29
TR2430|c0_g1_i4	43.83
TR2430|c0_g1_i5	44.12
TR2430|c0_g1_i6	7.19
TR2430|c0_g1_i7	3.91
TR24301|c0_g1_i1	36.71
TR24308|c0_g1_i1	9.36
TR2431|c1_g1_i1	64.11
TR2431|c1_g1_i2	23.15
TR24324|c0_g1_i1	5.76
TR24325|c0_g1_i3	20.18
TR24331|c0_g1_i1	23.11
TR24331|c0_g2_i1	10.64
TR24332|c0_g1_i1	18.33
TR24334|c0_g1_i1	97.26
TR24342|c2_g1_i1	12.05
TR2435|c0_g2_i1	805.69
TR2435|c0_g2_i2	113.53
TR24353|c0_g2_i1	131.61
TR24354|c0_g1_i2	43.56
TR24357|c0_g1_i1	41.86
TR24362|c0_g1_i1	431.6
TR24367|c1_g1_i1	36.68
TR2437|c0_g1_i1	51.08
TR24370|c0_g1_i1	31.61
TR2438|c0_g1_i1	5.86
TR24381|c0_g1_i1	44.76
TR2439|c0_g1_i1	13.72
TR2439|c0_g1_i2	12.71
TR2439|c0_g1_i3	10.59
TR24390|c0_g1_i3	12.05
TR24396|c0_g1_i1	9.13
TR24397|c0_g1_i1	14.03
TR24397|c1_g1_i2	12.95
TR24399|c0_g2_i1	82.71
TR2440|c0_g1_i1	52.87
TR2440|c0_g1_i3	35.73
TR24400|c0_g1_i2	30.85
TR24400|c1_g1_i2	29.2
TR24401|c0_g2_i1	18.28
TR2441|c0_g1_i1	13.81
TR2441|c0_g1_i3	40.55
TR24410|c0_g1_i1	36.18
TR24412|c1_g1_i1	10.35
TR24423|c0_g1_i1	10.51
TR24424|c0_g1_i1	34.4
TR24427|c0_g1_i3	26.98
TR2443|c1_g3_i5	51.67
TR2443|c1_g3_i8	24.79
TR2443|c1_g4_i1	25.96
TR24434|c0_g1_i1	8.24
TR2444|c0_g1_i2	27.66
TR2445|c0_g1_i1	1.67
TR2445|c0_g1_i2	5.52
TR2445|c0_g1_i3	30.69
TR2446|c0_g2_i2	7.95
TR24491|c0_g1_i1	23.54
TR24494|c0_g2_i1	15.93
TR24496|c0_g1_i1	20.11
TR24499|c0_g1_i2	9.57
TR24499|c0_g1_i3	4.79
TR24507|c0_g1_i1	21.77
TR24509|c0_g1_i1	16.16
TR24514|c0_g1_i2	38.3
TR24516|c0_g1_i2	15.98
TR24519|c0_g1_i1	61.14
TR24521|c0_g1_i1	2.52
TR24521|c0_g1_i2	13.97
TR24522|c0_g1_i1	20.93
TR24523|c0_g1_i1	24.44
TR24523|c0_g1_i2	58.93
TR24525|c0_g1_i1	37.89
TR24532|c0_g1_i1	9.62
TR24537|c0_g1_i1	2.17
TR24537|c0_g1_i2	6.17
TR24538|c0_g1_i1	36.73
TR24538|c0_g1_i2	21.24
TR2454|c1_g1_i1	8.55
TR2454|c1_g1_i3	19.18
TR2454|c1_g1_i6	11.08
TR24541|c0_g3_i1	7.24
TR24545|c0_g1_i1	65.44
TR2455|c0_g1_i1	18.95
TR24551|c0_g1_i1	13.46
TR24551|c1_g1_i3	18.43
TR24552|c1_g1_i5	6.63
TR24552|c1_g2_i1	2.9
TR24555|c0_g1_i1	9.65
TR24559|c1_g1_i1	11.14
TR24563|c0_g1_i2	59.26
TR24566|c0_g1_i2	10.86
TR2458|c0_g1_i1	5.48
TR24580|c0_g1_i1	22.53
TR24582|c0_g1_i1	28.13
TR24587|c0_g1_i1	8.89
TR24588|c0_g1_i1	18.17
TR24589|c0_g1_i1	14.98
TR2459|c0_g1_i1	18.56
TR2459|c0_g1_i2	7.79
TR24593|c0_g1_i8	54.41
TR24601|c0_g2_i1	105.45
TR24609|c0_g1_i1	18.96
TR2462|c0_g1_i3	11.29
TR2462|c0_g1_i6	48.81
TR2462|c0_g1_i7	5.52
TR2462|c0_g3_i1	34.52
TR2462|c0_g3_i2	43.57
TR24620|c0_g1_i1	37.94
TR24620|c0_g1_i3	41.63
TR24627|c1_g1_i1	33.38
TR24627|c1_g1_i2	8.08
TR24627|c1_g1_i5	13.13
TR2463|c0_g1_i1	27.78
TR24631|c0_g1_i1	20.92
TR24638|c0_g1_i1	12.38
TR2464|c0_g1_i3	6.77
TR24647|c0_g1_i1	31.2
TR24648|c0_g1_i1	45.35
TR24649|c0_g1_i1	4.25
TR2465|c0_g1_i1	55.91
TR2465|c0_g1_i2	1.46
TR2465|c0_g1_i3	15.23
TR2465|c0_g1_i4	10.49
TR2465|c0_g1_i7	14.21
TR24651|c0_g1_i1	29.8
TR24662|c0_g1_i1	11.89
TR24668|c0_g1_i1	13.03
TR24671|c0_g3_i2	7.95
TR24674|c0_g1_i1	17.79
TR2468|c1_g3_i1	4.58
TR2468|c1_g3_i2	8.86
TR24691|c1_g1_i1	10.3
TR24694|c0_g2_i1	29.39
TR2470|c1_g1_i4	4.41
TR2470|c1_g1_i8	19.67
TR24701|c0_g1_i1	26.04
TR24701|c0_g2_i1	8.97
TR24701|c0_g2_i2	50.93
TR24708|c0_g2_i1	6.53
TR2471|c0_g1_i2	65.13
TR2471|c0_g1_i4	64.71
TR24710|c0_g1_i1	39.07
TR24712|c0_g1_i1	10.21
TR24716|c0_g1_i1	10.57
TR24716|c0_g1_i2	28.5
TR24716|c0_g1_i3	7.27
TR24719|c0_g1_i1	76.05
TR24719|c1_g1_i1	28.53
TR24719|c1_g3_i1	21.62
TR24722|c0_g1_i1	8.56
TR24723|c0_g1_i1	19.39
TR2473|c0_g1_i2	10.58
TR2473|c0_g1_i3	6.55
TR24732|c0_g1_i1	11.17
TR24734|c0_g1_i1	41.61
TR24734|c0_g2_i1	33.48
TR24737|c0_g1_i1	22.34
TR24743|c0_g1_i1	0
TR24743|c0_g2_i1	145.08
TR2475|c0_g2_i1	38.32
TR2475|c0_g3_i2	147.79
TR24755|c0_g1_i2	17.73
TR24759|c0_g1_i1	6.97
TR24769|c0_g1_i3	10.52
TR24769|c0_g1_i4	5.61
TR2477|c0_g2_i1	19.13
TR2477|c0_g2_i3	38.06
TR24786|c0_g1_i1	5.87
TR2479|c0_g1_i1	7.9
TR2479|c0_g1_i3	6.32
TR24790|c0_g2_i1	11.62
TR24792|c0_g1_i2	227.16
TR24792|c0_g1_i3	54.88
TR24792|c0_g2_i1	123.82
TR24793|c0_g1_i1	15.83
TR24795|c0_g1_i2	44.21
TR24795|c0_g1_i3	154.46
TR24798|c0_g1_i3	91.29
TR24798|c0_g2_i1	74.25
TR24798|c0_g2_i3	231.5
TR24802|c0_g1_i3	10.13
TR24806|c0_g4_i2	4.13
TR24806|c0_g5_i2	12.13
TR24806|c0_g6_i1	21.96
TR24808|c0_g1_i1	24.13
TR24809|c0_g1_i1	26.37
TR24813|c0_g1_i3	7.2
TR24814|c1_g1_i4	33.65
TR24814|c1_g1_i5	61.19
TR24815|c0_g1_i1	41.09
TR24831|c0_g1_i1	16.88
TR24832|c0_g1_i1	17.54
TR24837|c0_g1_i1	14.65
TR24848|c0_g1_i3	32.65
TR2485|c3_g1_i2	92.14
TR24852|c0_g1_i2	29.51
TR24857|c0_g1_i1	4.66
TR2486|c0_g1_i1	55.52
TR2486|c0_g1_i2	48.16
TR2486|c0_g2_i3	81.03
TR2486|c0_g2_i4	30.83
TR2486|c0_g3_i1	19.79
TR24870|c0_g2_i1	31.06
TR24871|c0_g1_i1	15.64
TR24887|c0_g1_i1	16.68
TR24889|c0_g1_i2	15.9
TR24889|c0_g1_i3	16.24
TR24901|c0_g1_i1	200.2
TR24902|c0_g1_i1	52.71
TR24905|c0_g1_i1	51.21
TR2491|c0_g1_i5	14.2
TR24911|c0_g1_i4	20.44
TR2492|c0_g2_i2	32.55
TR24921|c0_g1_i1	10.75
TR24924|c1_g2_i1	21.73
TR24926|c0_g1_i1	13.93
TR24947|c0_g1_i1	46.67
TR24949|c0_g1_i1	8.45
TR24949|c0_g1_i2	14.53
TR24951|c0_g1_i2	9.97
TR24956|c0_g1_i1	20.05
TR24961|c0_g1_i1	12.24
TR24962|c0_g1_i1	33.07
TR24962|c0_g2_i1	46.22
TR24964|c0_g1_i2	15.58
TR24966|c0_g1_i1	6.94
TR24968|c1_g1_i1	116.93
TR24968|c1_g2_i2	64.92
TR24969|c0_g1_i1	23.04
TR2497|c0_g3_i1	116.5
TR2497|c0_g3_i3	229.46
TR2497|c0_g3_i5	533.7
TR2497|c0_g3_i6	765.88
TR2497|c0_g4_i1	939.03
TR24979|c0_g1_i1	53.11
TR2498|c0_g1_i1	17.88
TR2498|c0_g2_i1	22.24
TR2498|c0_g2_i2	15.26
TR24980|c0_g1_i1	12.04
TR24981|c0_g1_i2	54.27
TR24982|c0_g1_i1	24.46
TR24987|c0_g1_i1	6.42
TR24988|c0_g1_i5	14.56
TR24988|c0_g1_i6	12.77
TR24989|c0_g1_i1	18.86
TR2499|c0_g1_i3	65.51
TR24994|c0_g1_i1	7.92
TR2500|c0_g1_i4	9.57
TR25002|c0_g2_i3	24.48
TR25003|c0_g1_i1	7.54
TR25017|c0_g1_i1	55.01
TR25017|c0_g1_i3	66.78
TR25018|c0_g1_i1	8.64
TR2502|c0_g1_i1	60.14
TR25020|c0_g1_i1	29.93
TR25021|c0_g1_i1	18.6
TR25024|c0_g1_i3	106.69
TR25024|c0_g1_i4	98.05
TR25026|c0_g2_i1	46.07
TR25031|c0_g1_i1	19.13
TR25033|c0_g1_i2	19.94
TR25034|c0_g1_i1	14.72
TR25034|c0_g1_i2	39.08
TR25039|c0_g1_i3	123.95
TR2504|c0_g1_i1	32.01
TR25043|c0_g1_i1	19.32
TR25043|c1_g1_i1	13.12
TR25050|c0_g1_i1	6.99
TR25054|c0_g2_i1	16.99
TR25056|c0_g1_i1	60.66
TR2506|c0_g2_i1	31.42
TR25060|c0_g1_i1	35.45
TR25061|c0_g1_i1	12.97
TR25065|c0_g2_i1	21.44
TR25068|c0_g1_i1	29.72
TR25068|c1_g1_i2	24.42
TR2507|c0_g4_i1	7.22
TR25083|c0_g1_i3	22.17
TR25088|c0_g1_i1	13.36
TR25092|c0_g1_i1	154.21
TR25092|c0_g2_i1	9.29
TR25093|c1_g3_i1	37.03
TR25098|c0_g1_i1	11
TR2510|c0_g2_i4	5.9
TR2510|c0_g3_i1	1.43
TR25102|c1_g1_i1	5.02
TR25109|c0_g1_i1	8.62
TR25109|c0_g3_i1	24.18
TR25110|c1_g1_i1	36.66
TR25115|c0_g1_i2	17.77
TR25115|c0_g1_i4	8.36
TR2512|c1_g1_i1	9.01
TR25121|c0_g1_i1	82.41
TR25123|c0_g1_i1	21.94
TR25128|c0_g2_i3	9.35
TR25128|c0_g2_i4	9.75
TR2513|c1_g1_i1	37.87
TR2513|c1_g2_i1	24.06
TR25134|c0_g1_i1	21.83
TR2514|c1_g10_i1	2.19
TR2514|c1_g10_i4	17.89
TR2514|c1_g10_i5	6.86
TR2514|c1_g10_i6	36.57
TR2514|c1_g4_i1	25.25
TR2514|c1_g4_i2	15.78
TR2514|c1_g4_i3	14.69
TR2514|c1_g5_i1	104.99
TR2514|c1_g9_i1	6.76
TR2514|c1_g9_i2	15.54
TR2514|c1_g9_i3	73.25
TR25142|c0_g1_i1	19.4
TR25142|c0_g1_i4	25.23
TR25153|c0_g1_i1	24.64
TR25156|c0_g1_i1	195.91
TR2516|c0_g1_i3	14.54
TR25160|c0_g1_i4	21.26
TR25163|c0_g1_i1	83.97
TR2519|c0_g1_i1	21.5
TR25191|c0_g1_i1	10.99
TR25193|c0_g1_i1	3.36
TR25193|c0_g1_i3	9.4
TR25197|c0_g1_i1	39.2
TR25198|c0_g1_i1	41.47
TR25200|c0_g2_i1	79.58
TR25205|c0_g1_i1	39.53
TR25208|c0_g1_i2	8.95
TR2521|c0_g10_i2	19.55
TR2521|c0_g2_i1	35.07
TR2521|c0_g3_i2	78.85
TR2521|c0_g3_i3	76.35
TR2521|c0_g3_i5	50.96
TR2521|c0_g4_i2	25.97
TR25211|c0_g1_i1	31.87
TR25211|c0_g1_i2	35.79
TR25213|c0_g1_i1	32.6
TR25214|c0_g1_i4	7.22
TR25216|c0_g1_i1	40.24
TR25216|c0_g2_i2	110.92
TR25218|c0_g1_i2	32.66
TR25222|c0_g1_i1	18.85
TR2523|c0_g1_i2	48.93
TR2523|c0_g1_i8	80.7
TR2523|c0_g3_i2	34.96
TR25232|c0_g1_i1	31.93
TR25236|c0_g1_i2	9.29
TR25240|c0_g1_i1	17.15
TR25247|c0_g1_i2	7.73
TR25249|c0_g1_i1	195.82
TR25249|c0_g6_i1	546.98
TR2525|c0_g1_i1	5.82
TR2526|c0_g2_i3	18.96
TR25263|c0_g1_i4	207.85
TR25268|c0_g1_i1	55.01
TR25269|c0_g1_i1	8.67
TR25270|c0_g1_i1	16.1
TR25272|c0_g1_i1	48.48
TR25272|c0_g3_i1	0
TR25279|c0_g1_i1	19.41
TR2528|c3_g1_i3	5.66
TR25281|c0_g1_i1	14.08
TR25285|c0_g1_i1	47.66
TR25291|c0_g1_i1	16.1
TR25292|c0_g1_i4	1.54
TR25294|c0_g1_i1	34.63
TR25295|c0_g2_i1	16.25
TR2530|c0_g1_i1	11.1
TR2530|c1_g4_i1	5.8
TR2530|c1_g4_i2	4.82
TR2530|c1_g4_i3	7.19
TR25304|c0_g1_i1	15.8
TR25304|c1_g1_i1	23.96
TR25306|c1_g1_i1	223.02
TR25306|c1_g1_i2	160.05
TR25310|c0_g1_i1	8.24
TR25311|c0_g1_i2	23.55
TR25313|c0_g1_i1	208.89
TR2532|c0_g4_i1	19.15
TR2532|c0_g4_i2	12.86
TR25320|c0_g1_i1	16.82
TR25321|c0_g1_i2	34.34
TR25322|c0_g1_i1	18.06
TR25323|c0_g1_i1	47.27
TR25324|c0_g1_i1	37.44
TR25328|c0_g1_i2	34.83
TR25329|c0_g1_i2	4.19
TR25329|c0_g1_i3	12.14
TR25334|c0_g1_i3	33.43
TR25338|c0_g1_i1	6.54
TR2534|c0_g3_i1	12.48
TR2534|c0_g3_i2	10.46
TR2534|c0_g4_i1	17.37
TR2534|c0_g4_i3	14.91
TR25356|c0_g2_i3	12.72
TR25357|c0_g1_i3	13.13
TR25358|c0_g1_i5	11
TR2536|c0_g1_i2	17.77
TR25364|c0_g1_i1	12.18
TR25369|c0_g1_i1	19.56
TR2537|c1_g1_i1	7.61
TR25373|c1_g2_i1	28.6
TR25373|c1_g2_i3	18.66
TR25374|c0_g1_i2	38.37
TR25377|c0_g1_i1	8.96
TR25379|c0_g2_i1	17.51
TR25381|c0_g1_i2	20.6
TR25383|c0_g1_i3	19.97
TR25383|c0_g1_i4	48.74
TR25384|c0_g1_i2	42.04
TR2540|c1_g3_i1	34.53
TR2540|c2_g1_i1	16.57
TR2541|c0_g2_i2	15.82
TR2542|c1_g3_i2	107.53
TR2543|c1_g1_i11	0
TR2543|c1_g1_i12	4.51
TR2543|c1_g1_i14	16.87
TR2543|c1_g1_i3	0
TR2543|c1_g1_i4	1.68
TR2544|c0_g1_i10	8.7
TR2544|c0_g1_i2	13.19
TR2544|c0_g1_i6	9.77
TR2544|c0_g5_i1	7.59
TR2545|c0_g1_i1	77.54
TR2545|c0_g2_i1	27.33
TR2545|c0_g2_i2	40.35
TR2545|c0_g2_i4	83.14
TR2545|c1_g1_i1	76.93
TR2545|c1_g2_i1	136.21
TR2545|c1_g4_i1	62.78
TR2545|c1_g4_i2	12.43
TR2546|c0_g2_i1	9.1
TR2546|c0_g3_i1	9.23
TR2546|c0_g3_i2	1.77
TR2547|c0_g1_i1	165.82
TR2548|c0_g2_i1	23.06
TR2548|c0_g3_i2	21.02
TR2548|c0_g4_i1	19.41
TR25484|c0_g1_i2	21.31
TR25489|c0_g1_i1	12.01
TR2549|c0_g1_i1	121.32
TR2549|c0_g2_i1	90.12
TR25502|c0_g3_i1	27.2
TR25502|c0_g3_i2	312.13
TR25506|c2_g1_i1	110.17
TR25506|c2_g3_i1	249.82
TR2551|c0_g1_i4	62.75
TR25510|c1_g1_i2	17.97
TR25512|c0_g1_i2	36.73
TR25514|c0_g1_i1	88.75
TR25514|c0_g1_i2	48.7
TR25514|c0_g2_i1	4.99
TR25517|c0_g1_i3	30.6
TR25519|c0_g2_i2	5.86
TR25520|c0_g1_i2	6.1
TR25521|c0_g1_i1	196.79
TR25522|c0_g1_i1	7.28
TR25525|c1_g2_i1	95.54
TR25531|c0_g1_i2	14.75
TR25533|c0_g1_i1	30.48
TR25536|c0_g1_i1	24.87
TR25537|c0_g1_i1	11.72
TR2554|c0_g1_i3	5.81
TR25544|c1_g1_i1	21.7
TR25545|c0_g1_i2	10.83
TR25551|c0_g1_i1	19.95
TR25553|c0_g1_i1	7.37
TR25554|c0_g1_i1	60.31
TR25557|c0_g1_i1	8.84
TR25557|c0_g1_i2	27.01
TR25559|c0_g1_i1	12.93
TR2556|c1_g1_i1	11.46
TR2556|c1_g2_i1	14.67
TR25564|c0_g1_i1	6.2
TR25568|c0_g1_i1	22.49
TR25569|c0_g3_i1	42.25
TR25571|c0_g1_i1	18.59
TR25573|c1_g1_i2	5.32
TR25573|c1_g1_i4	50.95
TR25575|c0_g1_i1	239.81
TR25577|c0_g1_i1	16.92
TR25578|c0_g2_i1	865.35
TR25586|c0_g1_i1	47.54
TR25586|c1_g1_i1	19.38
TR25589|c0_g1_i1	443.08
TR2559|c1_g1_i2	115.78
TR2559|c2_g1_i1	104.14
TR2559|c2_g2_i1	28.87
TR2559|c2_g6_i1	94.5
TR25597|c0_g1_i2	11.48
TR25598|c0_g2_i1	28.42
TR2560|c1_g1_i1	15.9
TR25604|c0_g1_i1	56.28
TR25605|c0_g1_i1	29.45
TR25605|c0_g1_i2	11.22
TR2561|c0_g1_i2	5.9
TR2561|c0_g1_i3	4.1
TR25613|c0_g1_i1	12.28
TR25614|c0_g1_i1	20.04
TR25616|c0_g1_i2	21.73
TR25617|c0_g1_i1	41.08
TR25617|c0_g2_i1	10.92
TR25629|c0_g2_i1	17.27
TR25629|c0_g2_i2	4.16
TR2563|c0_g1_i1	34.42
TR2563|c0_g2_i1	18.17
TR2563|c0_g4_i1	52.65
TR2563|c0_g5_i1	109.84
TR2563|c0_g6_i1	62.17
TR2563|c0_g7_i2	36.82
TR25633|c0_g1_i1	53.54
TR25636|c0_g1_i10	10.7
TR25636|c0_g1_i4	5.67
TR2564|c0_g1_i1	39.94
TR2564|c0_g1_i4	7.33
TR2564|c0_g1_i5	29.84
TR25647|c1_g1_i1	81.67
TR25647|c1_g1_i2	5.8
TR2565|c0_g1_i1	27.81
TR2565|c0_g2_i1	8.42
TR25658|c0_g1_i1	12.77
TR25658|c0_g1_i2	43.46
TR25658|c0_g2_i1	37.76
TR25659|c0_g1_i1	238.9
TR25659|c0_g5_i1	29.65
TR2566|c0_g1_i3	15.74
TR25662|c0_g1_i1	8.23
TR25670|c0_g1_i1	132.63
TR25672|c1_g3_i1	14.84
TR25676|c0_g2_i1	20.43
TR2568|c0_g1_i1	47.59
TR25681|c0_g1_i2	38.78
TR25692|c0_g1_i1	27.61
TR25693|c0_g1_i1	39.8
TR25693|c0_g2_i1	26.18
TR25693|c0_g2_i2	2.15
TR25696|c0_g1_i2	13.68
TR2570|c0_g1_i14	0
TR25701|c4_g3_i1	31.31
TR25702|c0_g1_i1	30.51
TR25704|c0_g1_i1	204.73
TR2571|c0_g1_i3	59.24
TR2571|c0_g1_i5	77.96
TR25715|c0_g1_i1	11.31
TR25715|c0_g1_i2	18.09
TR2572|c1_g2_i4	2.64
TR2572|c1_g2_i5	5.69
TR2572|c1_g3_i2	14.69
TR25722|c1_g1_i3	0
TR25723|c0_g1_i1	9.91
TR25726|c0_g1_i1	14.49
TR25730|c0_g1_i2	7.15
TR25732|c0_g1_i1	11.83
TR25736|c0_g1_i1	21.03
TR25736|c1_g1_i1	13
TR25741|c0_g1_i3	6.82
TR25746|c0_g1_i1	94.45
TR25746|c0_g1_i3	0
TR25747|c0_g3_i2	22.92
TR2575|c0_g3_i1	32.53
TR2575|c0_g3_i2	52.13
TR2575|c0_g6_i1	99.35
TR25753|c0_g2_i1	19.89
TR25756|c0_g1_i1	9.15
TR25762|c0_g1_i2	7.62
TR25766|c0_g1_i1	18.28
TR2577|c0_g2_i1	73.95
TR2577|c0_g2_i3	43.74
TR25779|c0_g1_i1	11.75
TR25779|c0_g1_i2	0
TR25782|c0_g1_i2	17.87
TR25782|c0_g1_i3	4.82
TR25787|c1_g1_i1	6.63
TR25789|c0_g1_i1	27.69
TR25790|c0_g1_i1	25.53
TR25791|c0_g1_i3	5.61
[truncated: 71,266 more rows]

## Sheet: OB_P1
OB_P1	FPKM
TR1002|c0_g1_i1	20.87
TR10112|c0_g1_i1	15.96
TR10224|c0_g1_i1	16.97
TR10233|c0_g1_i1	59.08
TR10273|c0_g1_i1	24.16
TR1033|c0_g1_i1	21.88
TR10332|c0_g1_i1	21.78
TR10370|c0_g2_i1	32.96
TR1051|c0_g1_i1	22.78
TR10582|c0_g1_i1	21.6
TR10620|c1_g1_i1	48.33
TR1064|c0_g1_i1	16.58
TR1073|c0_g1_i1	25.74
TR10809|c0_g1_i1	45.91
TR10833|c0_g1_i1	30.61
TR10841|c0_g1_i1	4.31
TR11017|c0_g1_i1	22.68
TR1105|c0_g1_i1	35.66
TR1107|c0_g1_i1	22.19
TR11088|c0_g1_i1	24.19
TR11094|c0_g1_i1	12.75
TR11161|c0_g1_i1	24.85
TR11233|c0_g1_i1	44.99
TR11284|c0_g1_i1	23.26
TR11454|c0_g1_i1	23.79
TR11608|c0_g1_i1	9.97
TR1170|c0_g1_i1	42.16
TR12140|c0_g1_i1	18.71
TR1215|c0_g1_i1	26.26
TR12208|c0_g1_i1	37.42
TR12213|c0_g2_i1	13.22
TR1225|c0_g1_i1	16.32
TR12295|c0_g1_i1	43.92
TR12459|c0_g1_i1	16.71
TR12468|c0_g1_i1	12.71
TR12479|c0_g1_i1	9.11
TR1251|c0_g1_i1	11.94
TR12667|c0_g1_i1	28.28
TR12669|c0_g1_i1	112.12
TR12715|c0_g1_i1	11.34
TR1281|c0_g1_i1	22.68
TR12856|c0_g1_i1	218.36
TR12868|c0_g1_i1	27.9
TR12900|c0_g1_i1	122.58
TR12958|c0_g1_i1	19.89
TR12988|c0_g1_i1	10.54
TR1304|c0_g1_i1	30.06
TR1306|c0_g1_i1	26.51
TR13218|c0_g1_i1	14.75
TR13277|c0_g3_i1	34.44
TR13280|c0_g1_i1	39.39
TR13314|c0_g1_i1	9.49
TR13317|c0_g1_i1	35.03
TR13339|c0_g1_i1	20.71
TR13349|c0_g1_i1	25.33
TR13351|c0_g3_i1	32.26
TR13380|c0_g1_i1	89.61
TR13443|c0_g1_i1	74.17
TR13462|c0_g1_i2	12.42
TR13486|c0_g4_i1	63.44
TR13495|c0_g1_i1	33.29
TR1350|c0_g1_i1	36.68
TR13535|c0_g1_i1	70.42
TR13551|c0_g1_i1	72.49
TR13553|c0_g2_i1	26.4
TR13723|c0_g1_i1	75.77
TR13868|c0_g1_i1	12.56
TR13916|c0_g1_i1	15.1
TR13937|c0_g1_i1	7.44
TR1396|c0_g1_i1	75.43
TR13999|c0_g1_i1	27.76
TR14023|c0_g1_i1	21.89
TR14079|c0_g1_i1	48.47
TR14114|c0_g1_i1	82.02
TR14130|c0_g1_i1	40.4
TR14146|c0_g1_i1	15.6
TR14298|c0_g1_i1	68.08
TR14437|c0_g1_i1	59.36
TR14441|c0_g1_i1	57.46
TR14450|c0_g1_i1	22.44
TR14465|c0_g1_i1	14.65
TR14490|c0_g1_i1	17.13
TR14577|c0_g1_i1	28.44
TR14599|c0_g1_i1	39.95
TR14609|c0_g1_i1	65.72
TR1463|c0_g2_i1	9.45
TR14644|c0_g1_i1	25.69
TR14694|c0_g1_i1	55.98
TR14741|c0_g1_i1	58.92
TR1477|c0_g1_i1	12.62
TR14770|c0_g1_i1	266.96
TR1484|c0_g1_i1	34.6
TR14949|c0_g1_i1	188.53
TR14972|c0_g1_i1	114.97
TR14979|c0_g1_i1	0
TR14979|c0_g1_i2	132.77
TR15038|c0_g1_i1	374.79
TR15067|c0_g1_i1	29.8
TR15093|c0_g1_i1	43.45
TR15132|c0_g1_i1	121.12
TR15135|c0_g1_i1	15.71
TR15154|c0_g1_i1	21.02
TR15179|c0_g1_i1	27.52
TR1520|c0_g1_i1	28.36
TR15230|c0_g1_i1	41.38
TR15242|c0_g1_i1	27.2
TR15261|c0_g1_i1	16.59
TR15271|c0_g1_i1	8.08
TR15315|c0_g1_i1	9.52
TR15317|c0_g1_i1	27.54
TR15373|c0_g1_i1	15.1
TR15413|c0_g1_i1	29.45
TR15417|c0_g2_i1	36.07
TR15497|c0_g1_i1	15.01
TR15545|c0_g1_i1	8.84
TR15594|c0_g1_i1	25.97
TR15606|c0_g1_i1	587.62
TR15642|c0_g1_i1	29.99
TR15657|c0_g1_i1	8.98
TR15815|c0_g1_i1	149.3
TR15842|c0_g1_i1	14.61
TR15843|c0_g1_i1	79.99
TR15853|c0_g1_i1	163.72
TR15895|c0_g1_i1	64.51
TR15937|c0_g1_i1	12.59
TR15957|c0_g1_i1	61.71
TR15971|c0_g1_i1	10.98
TR15978|c0_g1_i2	13.6
TR15990|c0_g1_i1	51.97
TR15995|c0_g1_i1	38.3
TR16126|c0_g1_i1	20.83
TR16136|c0_g1_i1	33.48
TR16158|c0_g1_i1	14.34
TR16162|c0_g1_i1	14.9
TR16180|c0_g1_i1	72.02
TR16191|c0_g1_i1	15.12
TR16203|c0_g1_i2	39.95
TR16221|c0_g1_i1	41.58
TR16233|c0_g1_i1	68.43
TR16235|c0_g1_i1	25.03
TR16247|c0_g1_i1	42.03
TR16250|c0_g1_i1	45.91
TR16253|c0_g1_i1	72.36
TR16272|c0_g1_i1	25.74
TR16291|c0_g1_i1	32.33
TR16347|c0_g1_i1	50.4
TR16449|c0_g1_i2	49.77
TR16480|c0_g1_i1	142.82
TR16484|c0_g1_i1	16.13
TR16551|c0_g1_i1	21.58
TR16554|c0_g1_i1	10.41
TR16561|c0_g1_i1	41.31
TR16585|c0_g1_i2	22.13
TR16587|c0_g1_i1	18.06
TR16591|c0_g1_i1	22.06
TR16604|c0_g1_i1	21.32
TR16648|c0_g2_i1	109.33
TR16651|c0_g1_i1	81.32
TR16660|c0_g1_i1	48.61
TR1667|c0_g1_i1	619.5
TR1667|c0_g1_i5	15.67
TR1667|c0_g1_i6	0
TR16675|c0_g1_i1	14.87
TR16704|c0_g1_i1	48.9
TR16704|c1_g1_i1	67.73
TR16735|c0_g1_i1	8.68
TR16745|c0_g1_i2	14.97
TR16747|c0_g1_i1	30.03
TR16763|c0_g1_i1	35.33
TR1691|c0_g1_i1	12.56
TR16966|c0_g1_i1	10.97
TR1699|c0_g1_i1	17.99
TR17041|c0_g1_i1	21.96
TR17048|c0_g1_i1	9.71
TR17067|c0_g1_i1	141.1
TR1707|c0_g2_i1	5.08
TR17075|c0_g1_i1	26.76
TR17100|c0_g1_i1	8.08
TR17121|c0_g1_i1	28.46
TR17141|c0_g1_i1	17.67
TR17156|c0_g1_i2	21.21
TR17169|c0_g1_i1	9.69
TR17228|c0_g1_i1	69.37
TR17246|c0_g1_i1	14.3
TR17259|c0_g1_i1	19.1
TR17269|c0_g2_i1	1963.77
TR17271|c0_g1_i1	28.67
TR17273|c0_g1_i1	39.28
TR17280|c0_g1_i1	35.27
TR17313|c0_g1_i1	21.85
TR17341|c0_g1_i1	9.13
TR17341|c0_g1_i3	21.54
TR17345|c0_g1_i1	21.11
TR17350|c0_g2_i1	12.28
TR17368|c0_g1_i1	13.09
TR1738|c0_g1_i1	25.54
TR17381|c0_g1_i1	82.66
TR17405|c0_g1_i1	62.98
TR17426|c0_g1_i1	49.63
TR17449|c0_g1_i1	24.46
TR17449|c0_g1_i2	18.81
TR17454|c0_g1_i1	58.17
TR17454|c0_g2_i1	14.86
TR1746|c0_g2_i1	14.59
TR1746|c0_g3_i1	0
TR17474|c0_g1_i1	6.2
TR17487|c0_g1_i1	20.59
TR17495|c0_g1_i1	9.11
TR17550|c0_g1_i1	21.45
TR17558|c0_g1_i1	15.98
TR17581|c0_g1_i1	14.28
TR17588|c0_g1_i1	14.75
TR1759|c0_g1_i1	26.94
TR1760|c0_g1_i2	18.5
TR17602|c0_g1_i1	24.77
TR17629|c0_g1_i1	12.15
TR17644|c0_g2_i2	39.4
TR17685|c0_g1_i1	46.74
TR1772|c0_g2_i1	33.07
TR17730|c0_g1_i1	29.73
TR17739|c0_g2_i1	46.3
TR17759|c0_g1_i1	14.72
TR17767|c0_g1_i1	188.75
TR17791|c0_g1_i1	19.38
TR17801|c0_g1_i1	31.84
TR17832|c0_g1_i1	76.7
TR17862|c0_g1_i1	93.33
TR17865|c0_g1_i1	147.71
TR17866|c0_g2_i1	96.84
TR1787|c0_g1_i1	109.79
TR1788|c0_g1_i1	20.3
TR17894|c0_g1_i1	7.57
TR17900|c0_g1_i1	22.52
TR17911|c0_g1_i1	29.5
TR17935|c0_g1_i1	19.55
TR17947|c0_g1_i1	19.03
TR17955|c0_g1_i1	54.9
TR17969|c0_g1_i1	52.32
TR17992|c0_g1_i1	7.75
TR18016|c0_g1_i1	4.96
TR18016|c0_g1_i2	128.65
TR18037|c0_g1_i2	14.28
TR18046|c0_g1_i1	8.04
TR18096|c0_g1_i1	21.01
TR18104|c0_g1_i1	25.65
TR18111|c0_g1_i1	8.4
TR18118|c0_g1_i1	10.93
TR18140|c0_g1_i1	94.45
TR1816|c0_g1_i1	20.62
TR18163|c0_g1_i1	22.68
TR18175|c0_g1_i1	16.97
TR18179|c0_g1_i1	14.67
TR18189|c0_g1_i1	27.77
TR18270|c0_g1_i1	9.14
TR18273|c0_g1_i1	15.86
TR18286|c0_g1_i1	17.49
TR18288|c0_g1_i1	20.36
TR18306|c0_g1_i1	16.64
TR18322|c0_g2_i1	4.97
TR18325|c0_g1_i1	26.48
TR18351|c0_g1_i1	151.62
TR18364|c0_g1_i1	26.23
TR18366|c0_g1_i1	22.15
TR18408|c0_g1_i1	11.26
TR18414|c0_g1_i1	24.01
TR18414|c0_g3_i1	41.51
TR18417|c0_g1_i1	22.44
TR18435|c0_g1_i1	21.84
TR1849|c0_g1_i1	7.21
TR18497|c0_g1_i1	26.03
TR18522|c0_g1_i2	24.74
TR18523|c0_g1_i1	6.17
TR18527|c0_g4_i1	23.45
TR18559|c0_g1_i3	14.37
TR18579|c0_g1_i1	14.12
TR18595|c0_g1_i1	26.09
TR18608|c0_g1_i1	22.4
TR1861|c0_g1_i2	8.98
TR18620|c0_g1_i1	16.57
TR18639|c0_g1_i1	11.57
TR18677|c0_g1_i1	8.95
TR18682|c0_g1_i1	9.9
TR18687|c0_g1_i1	11.38
TR18710|c0_g1_i2	6.28
TR18723|c0_g1_i2	10.21
TR18726|c0_g1_i1	40.06
TR18764|c0_g1_i1	8.35
TR18771|c0_g1_i1	79.36
TR18784|c0_g1_i1	27.73
TR18805|c0_g1_i2	57.11
TR18807|c0_g1_i1	91.54
TR18836|c0_g1_i1	59.75
TR18839|c0_g2_i1	100.05
TR18847|c0_g1_i1	44.84
TR18848|c0_g1_i1	11.2
TR18849|c0_g1_i2	21.74
TR18888|c0_g1_i1	18.86
TR18894|c0_g1_i1	13.51
TR18896|c0_g1_i1	19.97
TR18900|c1_g1_i1	6.25
TR18914|c0_g1_i2	126.47
TR18928|c0_g1_i1	148.7
TR19006|c0_g1_i1	247.5
TR19008|c0_g1_i1	209.22
TR19026|c0_g1_i1	5.53
TR19030|c0_g1_i2	52.82
TR19036|c0_g1_i1	5.83
TR19036|c0_g2_i1	12.4
TR19040|c0_g1_i1	47.22
TR19040|c0_g1_i2	0
TR19040|c0_g2_i2	23
TR19054|c0_g1_i1	8.14
TR19059|c0_g1_i1	51.89
TR19069|c0_g1_i1	639.14
TR19108|c0_g1_i1	128.46
TR19118|c0_g1_i1	40.2
TR19122|c0_g1_i1	22.3
TR19137|c0_g1_i2	30.74
TR19140|c0_g1_i1	318.99
TR19144|c0_g1_i1	19.39
TR19149|c0_g1_i1	11.48
TR19155|c0_g1_i1	25.44
TR19175|c0_g1_i1	18.21
TR19193|c0_g1_i1	55.16
TR1922|c0_g1_i1	28
TR19223|c0_g1_i1	20.03
TR19229|c0_g1_i1	21.27
TR19239|c0_g1_i1	13.31
TR19242|c0_g1_i1	17.78
TR19244|c0_g1_i1	8.81
TR19254|c0_g1_i1	52.32
TR19279|c0_g1_i1	41.16
TR19288|c0_g1_i1	41.96
TR19291|c0_g1_i3	44.62
TR19302|c0_g1_i1	17.16
TR19303|c0_g1_i1	24.78
TR19360|c0_g1_i1	14.02
TR19377|c0_g1_i1	72.88
TR19383|c0_g1_i2	168.85
TR19385|c0_g1_i1	15.2
TR19389|c0_g1_i1	45.87
TR19435|c0_g1_i1	19.15
TR19438|c0_g1_i1	8.86
TR19449|c0_g1_i1	31.89
TR19470|c0_g1_i1	20.38
TR19485|c0_g1_i1	19.68
TR19486|c0_g2_i1	35.2
TR19488|c0_g1_i1	43.67
TR19498|c0_g1_i1	11.25
TR19514|c0_g1_i1	160.29
TR19514|c0_g1_i2	49.04
TR19546|c0_g2_i1	36.07
TR19553|c0_g1_i1	6.62
TR19561|c0_g1_i1	10.64
TR19573|c0_g1_i1	13.12
TR1959|c0_g1_i1	33.65
TR19591|c0_g1_i1	21.39
TR19603|c0_g2_i1	27.33
TR19613|c0_g2_i1	11.14
TR19631|c0_g2_i1	56.17
TR19637|c0_g1_i2	18.05
TR19662|c0_g1_i1	13.3
TR19685|c0_g1_i1	36.42
TR19688|c0_g2_i1	47.26
TR19716|c0_g1_i1	90.62
TR19720|c0_g1_i1	5.06
TR19730|c0_g1_i1	10.29
TR19734|c0_g1_i1	84.83
TR19748|c0_g1_i1	56.89
TR19751|c0_g2_i1	8.72
TR19773|c0_g1_i1	15.06
TR19773|c0_g1_i2	21.17
TR19835|c0_g1_i1	10.96
TR19839|c0_g1_i1	13.37
TR19861|c0_g1_i1	13.96
TR19865|c0_g1_i1	17.19
TR19875|c0_g1_i2	8.28
TR19879|c0_g1_i1	64.31
TR19890|c0_g1_i2	9.49
TR19890|c0_g1_i3	63.89
TR19890|c0_g1_i4	0
TR19897|c0_g1_i1	20.66
TR1990|c0_g1_i1	16.16
TR19902|c0_g1_i1	28.85
TR19903|c0_g1_i1	34.88
TR19914|c0_g1_i1	12.01
TR19914|c0_g1_i2	22.11
TR19950|c0_g2_i1	16.89
TR19961|c0_g1_i1	90.15
TR19972|c0_g1_i1	9.31
TR19981|c0_g1_i1	10.18
TR19984|c0_g1_i1	97.33
TR20014|c0_g1_i1	124.91
TR20014|c0_g1_i2	51.65
TR20021|c0_g1_i1	45.75
TR20022|c0_g1_i1	19.27
TR20027|c0_g1_i1	89.61
TR20032|c0_g1_i1	28.66
TR20054|c0_g1_i1	13.27
TR20059|c0_g2_i1	17.01
TR2006|c0_g1_i1	15.35
TR20060|c0_g2_i1	11.77
TR20066|c0_g1_i1	545.71
TR20091|c0_g1_i1	42.33
TR2012|c0_g2_i1	68.21
TR20124|c0_g2_i1	0
TR20125|c0_g1_i1	7.39
TR20127|c0_g1_i1	8.49
TR20137|c0_g1_i2	8.84
TR20144|c0_g1_i2	60
TR20145|c0_g1_i1	76.15
TR20160|c0_g1_i1	13.56
TR20169|c0_g1_i1	56.65
TR20199|c0_g1_i2	13.95
TR20200|c0_g1_i1	12.67
TR20238|c0_g1_i1	12.29
TR20255|c0_g1_i1	7.14
TR20263|c0_g1_i2	12.38
TR20267|c0_g1_i1	9.35
TR2027|c0_g1_i1	19.09
TR20276|c0_g1_i2	23.98
TR20277|c0_g1_i1	16.29
TR20285|c0_g1_i1	11.9
TR20294|c0_g1_i1	19.57
TR20317|c0_g1_i1	70.83
TR20327|c1_g1_i1	10.75
TR20328|c0_g1_i1	17.78
TR20337|c0_g1_i2	21.26
TR20346|c0_g1_i1	62.33
TR20347|c1_g1_i1	29.84
TR2035|c0_g1_i1	16.97
TR20363|c0_g1_i1	27.67
TR20363|c0_g1_i2	48.22
TR20366|c0_g2_i1	29.87
TR20368|c0_g1_i1	68.22
TR20371|c0_g1_i1	7.69
TR20386|c0_g1_i1	10.93
TR20401|c0_g2_i1	34.18
TR20410|c0_g1_i1	20.71
TR20413|c0_g2_i1	112.27
TR20436|c0_g1_i1	147.17
TR20442|c0_g1_i1	28.23
TR20450|c0_g1_i1	41.18
TR20465|c0_g1_i1	11.47
TR20467|c0_g2_i1	10.87
TR20471|c0_g1_i1	223.09
TR20472|c0_g1_i1	6.51
TR20472|c0_g1_i2	0
TR20480|c0_g1_i1	23.13
TR20497|c0_g1_i1	67.35
TR20504|c0_g1_i1	12.6
TR2051|c0_g1_i1	32.39
TR20531|c0_g1_i1	11.78
TR20532|c0_g1_i1	4.85
TR20532|c0_g1_i2	14.55
TR20532|c0_g2_i1	13.98
TR20537|c0_g1_i1	18.67
TR20541|c0_g1_i1	24.02
TR20558|c0_g2_i1	10.17
TR20559|c0_g1_i1	11.59
TR20560|c0_g2_i2	12.59
TR20565|c0_g1_i1	289.82
TR20566|c0_g1_i1	23.76
TR20597|c0_g1_i3	28.07
TR20597|c0_g1_i4	4.62
TR20613|c0_g1_i1	6.29
TR20645|c0_g1_i1	11.9
TR20664|c0_g1_i1	16.23
TR20669|c0_g1_i1	32.73
TR20673|c0_g1_i1	63.87
TR20687|c0_g1_i1	7.74
TR20689|c0_g1_i1	5.1
TR20710|c1_g1_i3	6.02
TR20710|c1_g1_i5	2.32
TR20714|c0_g1_i4	6.28
TR20726|c0_g1_i1	28.88
TR20732|c0_g1_i2	29.2
TR20733|c0_g1_i1	16.48
TR20734|c0_g1_i1	8.57
TR20737|c0_g1_i1	17.53
TR20740|c0_g1_i2	35.31
TR20758|c0_g1_i1	40.78
TR20767|c0_g1_i2	16.38
TR20773|c0_g1_i2	28.99
TR20774|c0_g1_i1	11.47
TR20779|c0_g1_i1	54.52
TR20784|c0_g1_i1	17.19
TR20787|c0_g1_i2	11.71
TR20789|c0_g1_i1	4.04
TR20791|c0_g1_i1	63.24
TR20792|c0_g1_i1	21.09
TR20796|c0_g1_i1	5.32
TR20796|c0_g1_i3	17.21
TR20806|c0_g1_i1	43.28
TR20820|c0_g1_i1	8.66
TR20839|c0_g1_i2	21.19
TR20882|c0_g2_i1	12.75
TR20885|c1_g1_i1	9.95
TR20887|c0_g1_i1	24.96
TR20903|c0_g1_i3	9.3
TR20911|c0_g1_i1	14.39
TR20913|c0_g1_i1	48.09
TR20918|c0_g1_i1	71.29
TR20919|c0_g1_i1	36.9
TR20941|c0_g1_i1	33.03
TR2095|c0_g1_i1	16.91
TR20986|c0_g1_i1	68.26
TR20986|c0_g1_i2	9.45
TR20989|c0_g1_i1	15.92
TR21007|c0_g1_i4	21.82
TR21008|c0_g1_i2	8.84
TR21009|c0_g1_i1	17.35
TR21011|c1_g1_i1	49.38
TR21023|c0_g1_i1	17.01
TR21031|c0_g1_i2	89.14
TR21042|c0_g1_i5	15.51
TR21046|c0_g1_i2	18.97
TR21050|c0_g1_i2	7.82
TR21055|c0_g1_i3	0
TR21055|c0_g1_i4	4.44
TR21060|c0_g1_i1	21.37
TR21074|c0_g1_i2	23.54
TR21081|c0_g1_i1	16.16
TR21083|c0_g1_i1	52.19
TR21101|c0_g1_i5	35.09
TR21104|c0_g1_i1	52.64
TR21116|c0_g1_i1	11.38
TR21126|c0_g2_i1	16.36
TR21129|c0_g1_i1	9.11
TR21130|c0_g1_i1	4.05
TR21130|c0_g1_i2	1.21
TR21132|c0_g1_i2	14.12
TR21140|c0_g1_i1	13.12
TR21147|c0_g2_i1	31.3
TR21148|c0_g1_i1	17.08
TR21158|c0_g1_i1	13.65
TR21169|c0_g3_i1	28.18
TR21177|c0_g1_i1	19.51
TR21178|c0_g1_i1	62.91
TR21180|c0_g2_i2	36.46
TR21190|c0_g1_i1	43.56
TR21194|c0_g1_i1	47.43
TR21195|c0_g1_i2	9.51
TR21217|c0_g1_i1	60.44
TR21223|c0_g1_i1	69.87
TR21249|c0_g1_i2	39.28
TR21261|c0_g1_i1	53.91
TR21281|c0_g1_i1	51.62
TR21282|c1_g1_i3	13.77
TR21282|c2_g1_i1	105.08
TR21288|c0_g1_i1	34.45
TR21292|c0_g1_i1	63.76
TR21294|c0_g1_i1	24.53
TR21296|c0_g1_i1	51.08
TR21299|c0_g1_i1	5.67
TR21323|c0_g1_i2	11.83
TR2133|c0_g1_i1	13.56
TR21331|c0_g1_i1	85.29
TR21342|c0_g1_i1	9.41
TR21347|c0_g1_i1	23.8
TR21376|c0_g1_i1	19.32
TR21383|c0_g2_i1	20.46
TR21385|c0_g1_i1	411.12
TR21397|c0_g1_i1	4.28
TR21406|c0_g1_i3	3.4
TR21406|c0_g1_i4	11.48
TR21410|c0_g1_i1	118.99
TR21411|c0_g1_i1	8.99
TR21413|c0_g1_i1	21.06
TR21422|c0_g1_i1	6.89
TR21433|c0_g1_i1	11.43
TR21445|c0_g1_i1	20.39
TR2145|c0_g1_i1	31.75
TR21450|c0_g1_i1	35.5
TR21454|c0_g1_i1	56.31
TR21455|c0_g1_i1	21.78
TR21456|c0_g1_i1	131.14
TR21464|c0_g1_i1	43.61
TR21468|c0_g1_i1	25.12
TR2149|c0_g1_i1	14.88
TR21490|c1_g1_i1	22.04
TR21496|c1_g1_i1	4.99
TR21496|c1_g1_i2	2.02
TR21497|c0_g1_i2	36.23
TR21501|c0_g1_i1	42.2
TR21513|c0_g1_i1	22.76
TR21517|c0_g1_i1	41.91
TR21517|c0_g2_i1	8.81
TR21522|c0_g2_i1	7.91
TR21532|c0_g1_i1	349.33
TR2157|c0_g1_i3	2.77
TR2157|c0_g3_i1	23.76
TR2158|c0_g1_i2	5.31
TR2159|c0_g1_i1	19.89
TR2160|c0_g1_i1	8.3
TR2160|c0_g1_i2	10.98
TR21606|c0_g1_i1	21.38
TR2161|c0_g8_i1	82.12
TR21614|c0_g1_i1	13.87
TR2163|c0_g1_i1	57.79
TR2163|c0_g1_i2	25.48
TR2163|c0_g1_i3	13.91
TR2163|c0_g3_i1	30.03
TR2163|c0_g3_i2	17.95
TR21630|c0_g1_i2	28.42
TR21633|c0_g1_i1	21.13
TR21645|c0_g1_i1	12.74
TR21648|c0_g1_i1	34.23
TR2165|c0_g1_i1	36.13
TR2165|c0_g1_i2	6.46
TR21651|c0_g1_i2	30.14
TR21658|c0_g1_i1	19.02
TR2167|c0_g1_i4	18.37
TR21671|c0_g1_i1	16.76
TR21678|c0_g1_i1	11.51
TR21679|c1_g2_i1	10.79
TR21681|c0_g1_i1	9.37
TR2169|c0_g3_i1	42.04
TR2169|c0_g4_i1	24.56
TR21693|c0_g1_i2	0
TR21697|c0_g1_i1	10.77
TR21699|c0_g1_i1	261.08
TR2170|c1_g3_i1	13.37
TR21701|c0_g1_i1	5.98
TR21701|c0_g2_i1	12.77
TR21702|c0_g1_i1	9.38
TR2171|c0_g1_i1	109.85
TR2171|c0_g1_i2	377.96
TR2171|c0_g2_i2	0
TR2171|c0_g2_i4	501.71
TR2171|c0_g2_i6	739.02
TR21714|c0_g1_i2	4.45
TR21719|c1_g1_i2	8.03
TR21723|c0_g1_i1	6.97
TR21724|c0_g1_i2	13.28
TR21737|c0_g1_i1	55.38
TR21743|c0_g1_i1	17.05
TR21746|c0_g1_i1	15.43
TR21750|c0_g1_i1	22.05
TR21751|c0_g1_i1	26.72
TR21755|c0_g1_i4	3.27
TR21756|c0_g1_i1	13.14
TR2176|c0_g1_i1	2.49
TR2176|c0_g1_i5	3.39
TR2176|c0_g1_i8	14.16
TR2176|c0_g4_i1	8.49
TR21762|c0_g1_i1	19.15
TR21765|c0_g1_i1	17.65
TR2177|c0_g1_i2	4.04
TR21776|c0_g1_i1	0.97
TR21776|c0_g1_i3	18.97
TR21776|c0_g2_i1	13.08
TR2178|c4_g2_i1	100.02
TR2178|c5_g1_i2	28.86
TR21781|c0_g1_i1	15.6
TR21782|c0_g1_i1	10
TR2179|c0_g1_i1	130.73
TR2179|c0_g1_i3	46.73
TR21794|c0_g1_i2	6.78
TR2180|c0_g1_i3	10.56
TR2180|c0_g1_i8	14.38
TR21800|c0_g1_i1	0
TR2181|c0_g2_i1	44.43
TR21814|c0_g1_i1	18.58
TR2182|c0_g1_i1	3.56
TR21823|c0_g1_i1	9.71
TR21844|c0_g1_i1	15.2
TR21844|c0_g1_i2	31.11
TR21846|c0_g1_i1	41.65
TR21846|c0_g2_i1	12.56
TR21846|c0_g3_i1	0
TR21846|c0_g4_i1	21.54
TR21857|c0_g1_i1	12.69
TR21860|c0_g1_i1	28.34
TR21870|c0_g1_i1	3.5
TR21873|c0_g1_i1	7.77
TR2188|c0_g1_i5	13.87
TR2188|c0_g1_i6	48.35
TR2188|c0_g5_i1	0
TR21889|c0_g1_i1	19.54
TR2189|c0_g1_i1	251.23
TR21896|c0_g1_i1	8.58
TR21902|c0_g1_i1	163.93
TR2192|c0_g2_i1	27.19
TR2192|c0_g2_i3	10.17
TR2192|c0_g2_i4	26.11
TR2192|c0_g2_i6	39.74
TR21923|c0_g2_i1	17.47
TR21923|c0_g2_i2	13.6
TR2193|c0_g1_i2	9.84
TR21937|c0_g1_i1	25.46
TR2194|c0_g1_i2	1.64
TR2194|c0_g1_i3	13.28
TR21940|c0_g1_i2	10.88
TR21946|c0_g1_i1	17.51
TR21949|c0_g1_i1	26.62
TR21949|c0_g3_i1	9.34
TR21949|c0_g3_i2	17.51
TR2195|c0_g1_i3	73.52
TR2195|c0_g1_i4	10.71
TR2195|c0_g1_i8	1.86
TR2195|c0_g1_i9	24.43
TR21956|c0_g1_i1	24.19
TR21959|c0_g1_i1	38.28
TR2196|c0_g1_i1	32.55
TR2197|c0_g1_i1	17.16
TR2197|c0_g2_i2	41.86
TR2197|c0_g2_i4	27.41
TR21986|c0_g1_i1	5.98
TR22002|c1_g1_i1	18.99
TR22002|c1_g1_i5	22.08
TR22009|c0_g1_i1	46.12
TR2201|c0_g1_i1	38.9
TR2201|c0_g3_i1	17.61
TR2201|c0_g3_i2	4.78
TR22014|c0_g1_i1	12.6
TR22023|c0_g1_i1	9.35
TR22023|c0_g1_i3	24.34
TR22025|c0_g1_i1	13.65
TR22036|c0_g2_i1	16.25
TR22051|c0_g1_i1	0
TR2207|c0_g1_i1	3.94
TR2207|c0_g1_i2	1.33
TR2207|c0_g1_i7	4.1
TR2208|c1_g1_i2	30.98
TR22084|c0_g1_i1	92.17
TR22084|c0_g1_i2	68.01
TR2209|c0_g3_i2	0.91
TR2209|c0_g3_i3	71.09
TR22093|c0_g1_i1	10.5
TR22095|c0_g1_i1	12.87
TR22098|c0_g1_i2	29.2
TR22110|c0_g3_i1	29.63
TR22115|c0_g1_i1	92.48
TR2212|c1_g1_i1	79.83
TR2212|c1_g1_i2	68.26
TR2212|c1_g2_i1	19.49
TR2212|c1_g2_i2	61.71
TR22122|c0_g1_i1	5.32
TR22128|c0_g1_i3	4.49
TR2213|c0_g1_i1	69.18
TR22134|c0_g1_i2	13.49
TR22136|c0_g1_i1	16.44
TR2214|c1_g1_i1	45.16
TR2214|c2_g1_i1	138.22
TR2214|c2_g1_i2	78.87
TR2214|c3_g2_i1	93.01
TR2214|c3_g4_i1	339.04
TR2214|c3_g9_i1	71.39
TR22158|c0_g1_i1	16.73
TR2216|c1_g1_i1	35.21
TR2216|c1_g2_i1	43.83
TR2216|c1_g5_i1	28.33
TR22166|c0_g1_i2	13.2
TR2217|c0_g1_i2	45.65
TR2217|c1_g1_i2	2.73
TR2217|c1_g2_i1	25.26
TR22171|c1_g4_i1	566.99
TR2218|c1_g2_i1	42.62
TR22180|c0_g1_i1	15.35
TR22194|c0_g1_i1	4.74
TR22196|c0_g1_i1	27.55
TR22205|c0_g1_i1	5.04
TR2221|c0_g1_i2	40.83
TR22215|c0_g1_i1	42.79
TR22223|c0_g1_i2	12.35
TR22225|c0_g1_i1	36.5
TR2223|c0_g1_i3	9.33
TR22245|c0_g1_i1	14.12
TR2225|c1_g11_i1	102.89
TR2225|c1_g11_i10	66.11
TR2225|c1_g11_i2	36.63
TR2225|c1_g11_i5	58.84
TR2225|c1_g11_i8	42.56
TR2225|c1_g12_i1	39.99
TR22251|c0_g1_i1	31.97
TR22259|c0_g1_i1	7.52
TR22259|c0_g1_i2	15.82
TR2226|c0_g1_i1	26.52
TR2228|c0_g2_i2	88.68
TR22282|c0_g1_i1	50.04
TR22286|c0_g1_i1	20.48
TR22292|c0_g1_i1	15.84
TR22308|c0_g1_i1	120.25
TR2231|c0_g1_i1	11.58
TR22310|c0_g1_i1	43.81
TR2232|c0_g1_i1	11.75
TR22333|c0_g1_i1	29.84
TR22337|c0_g1_i1	5.58
TR2236|c0_g1_i1	15.59
TR22370|c0_g1_i1	13.06
TR22379|c0_g1_i1	365.28
TR2238|c0_g1_i1	3.81
TR2238|c0_g1_i4	2.49
TR22386|c0_g1_i1	36.56
TR2239|c0_g3_i1	118.86
TR2239|c0_g3_i3	93.66
TR2239|c0_g3_i4	12.68
TR22390|c0_g1_i1	14.71
TR22408|c0_g1_i1	7.99
TR22412|c0_g1_i1	52.06
TR22419|c0_g1_i1	11.79
TR22423|c0_g1_i1	21.79
TR2243|c0_g1_i1	6.59
TR2243|c0_g1_i2	27.85
TR2243|c0_g2_i1	29.99
TR22431|c0_g1_i1	25.89
TR22432|c0_g1_i1	24.05
TR22435|c0_g1_i1	16.66
TR22438|c0_g1_i1	12.98
TR2244|c1_g1_i6	278.33
TR2244|c1_g1_i7	304.49
TR2244|c1_g1_i8	12.29
TR22440|c0_g1_i2	14.32
TR22446|c0_g2_i1	21.17
TR22447|c0_g1_i1	31.87
TR2245|c4_g1_i1	5.24
TR2246|c0_g1_i1	62.9
TR2247|c0_g1_i1	16.75
TR2248|c0_g1_i2	2.76
TR2248|c0_g1_i5	23.21
TR2248|c1_g3_i1	19.2
TR22493|c0_g1_i1	6.15
TR2250|c2_g2_i2	110.52
TR2250|c3_g1_i1	170.6
TR2250|c3_g1_i2	13.9
TR2253|c1_g2_i1	75.2
TR22531|c0_g1_i1	24.01
TR22536|c0_g1_i1	31.71
TR2254|c0_g1_i1	68.42
TR2254|c0_g1_i10	10.02
TR2255|c10_g1_i1	12.83
TR2255|c10_g3_i3	45.62
TR2255|c10_g4_i1	34.94
TR22554|c0_g1_i1	17.69
TR2256|c0_g1_i2	49.5
TR2256|c1_g2_i2	33.45
TR2256|c2_g1_i1	67.93
TR2256|c3_g1_i1	99.12
TR2256|c3_g1_i2	117.94
TR2256|c3_g1_i3	86.41
TR2256|c3_g1_i9	26.81
TR22560|c0_g1_i1	7.9
TR22564|c0_g2_i1	18.26
TR22581|c0_g1_i2	8.18
TR22583|c1_g1_i1	22.61
TR2259|c1_g1_i1	30.56
TR2259|c1_g1_i3	2.9
TR22590|c0_g1_i1	18.81
TR22599|c0_g1_i1	39.21
TR22599|c0_g2_i1	6.43
TR2260|c0_g2_i1	393.49
TR2260|c0_g3_i1	42.21
TR2260|c0_g3_i2	817.01
TR22601|c0_g1_i1	39.4
TR22608|c1_g1_i3	27.03
TR2261|c0_g1_i1	85.33
TR2261|c0_g2_i1	57.23
TR2261|c0_g2_i3	148.92
TR2261|c0_g3_i2	107.67
TR2261|c0_g4_i1	145.34
TR2261|c0_g5_i1	29.99
TR22619|c0_g1_i1	31.42
TR2262|c0_g1_i1	5.72
TR2262|c0_g7_i1	23.19
TR2263|c1_g1_i8	30.49
TR22639|c0_g1_i1	16.01
TR2264|c0_g1_i2	20.44
TR2264|c0_g1_i4	14.5
TR2264|c0_g2_i1	0
TR2265|c0_g4_i1	16.52
TR22658|c0_g1_i1	28
TR22658|c0_g2_i2	27.24
TR2266|c0_g1_i1	4.65
TR2266|c0_g1_i2	104.19
TR2266|c0_g1_i3	319.88
TR22661|c1_g1_i2	157.47
TR22678|c0_g1_i2	14.15
TR22687|c0_g1_i1	16.01
TR22689|c0_g1_i1	8.63
TR22689|c0_g3_i1	12.92
TR22709|c0_g1_i1	23.14
TR22716|c0_g1_i1	7.41
TR22724|c0_g1_i1	103.68
TR22729|c0_g1_i1	14.25
TR2273|c1_g1_i2	24.82
TR2273|c1_g1_i3	146.89
TR22739|c0_g1_i1	111.62
TR22739|c0_g2_i1	125.57
TR22739|c0_g3_i1	235.63
TR22739|c0_g3_i2	123.67
TR2274|c0_g1_i3	14.88
TR22746|c0_g1_i3	8.07
TR22747|c0_g1_i2	9.83
TR2277|c0_g1_i1	16.22
TR2277|c0_g1_i2	0
TR2277|c0_g1_i3	6.36
TR22774|c0_g1_i2	267.48
TR22780|c0_g1_i1	10.1
TR22789|c0_g1_i1	12.92
TR2279|c0_g3_i2	7.97
TR22790|c0_g1_i2	19.89
TR22792|c0_g1_i1	9.76
TR22799|c0_g1_i1	23.61
TR2280|c0_g1_i1	810.96
TR2280|c0_g4_i2	155.49
TR22803|c0_g1_i1	27.14
TR22805|c0_g1_i1	202.05
TR22817|c0_g2_i1	16.01
TR2282|c0_g1_i1	13.17
TR22821|c0_g1_i2	21.01
TR22823|c0_g1_i2	45.72
TR22829|c0_g1_i1	35.38
TR2283|c0_g1_i1	46.44
TR2283|c0_g5_i1	33.02
TR22835|c0_g1_i1	8.51
TR2284|c0_g3_i1	13.23
TR2284|c0_g5_i1	3.79
TR22846|c0_g1_i1	101.93
TR22846|c0_g1_i2	15.72
TR22855|c0_g1_i2	10.23
TR22859|c0_g1_i1	7.25
TR2286|c0_g1_i3	13.46
TR22863|c0_g1_i1	209.28
TR22865|c0_g1_i1	21.38
TR22869|c0_g1_i1	7.48
TR22878|c0_g1_i1	15.91
TR22885|c0_g1_i1	7.13
TR22885|c0_g2_i1	18.94
TR22894|c0_g1_i1	39.72
TR22894|c0_g2_i1	0
TR22896|c0_g1_i3	12.56
TR2290|c0_g2_i4	21.93
TR22907|c0_g1_i1	3.34
TR22910|c0_g1_i1	16.95
TR22912|c0_g1_i1	50.74
TR22919|c0_g1_i1	11.47
TR22919|c0_g1_i2	5.52
TR22923|c0_g1_i1	22.69
TR22926|c0_g1_i1	26.24
TR22928|c0_g1_i1	7.3
TR2293|c0_g1_i1	7.98
TR2293|c0_g2_i1	12.86
TR2293|c0_g2_i2	1.74
TR22937|c0_g1_i1	24.79
TR2294|c0_g3_i2	156.76
TR2294|c0_g3_i3	60.11
TR2294|c0_g3_i4	20.2
TR2294|c0_g4_i1	14.58
TR2294|c0_g4_i3	45.84
TR2294|c0_g5_i1	0
TR2294|c0_g7_i2	17.38
TR22942|c0_g2_i1	28.54
TR22945|c0_g1_i1	11.69
TR22950|c0_g1_i1	20.83
TR2296|c0_g3_i1	17.67
TR2296|c0_g4_i3	17.28
TR2297|c0_g1_i2	6.72
TR2297|c0_g2_i2	0
TR2297|c0_g3_i1	107.71
TR2297|c0_g3_i2	21.33
TR22975|c0_g1_i1	24.7
TR22979|c0_g1_i1	17.73
TR22981|c0_g1_i1	19.14
TR22982|c0_g1_i1	12.64
TR2299|c0_g1_i1	87.23
TR22993|c0_g1_i1	18.68
TR22995|c0_g1_i2	68.91
TR22995|c0_g1_i3	0
TR22996|c0_g1_i1	6.51
TR23003|c0_g1_i1	138.89
TR23003|c0_g1_i2	60.87
TR23004|c0_g1_i1	17.41
TR23008|c0_g1_i1	58.24
TR23010|c0_g1_i1	9.78
TR23026|c0_g1_i1	15.71
TR2303|c0_g1_i1	52.4
TR2303|c1_g3_i1	67.51
TR2303|c1_g3_i10	17.49
TR2303|c1_g3_i2	15.41
TR2303|c1_g3_i3	6.73
TR2303|c1_g3_i4	17.07
TR2303|c1_g3_i5	146.48
TR2303|c1_g3_i8	133.6
TR23035|c0_g1_i1	68.82
TR2304|c0_g1_i1	47.51
TR2304|c0_g1_i3	2.78
TR23041|c0_g1_i1	12.6
TR23042|c0_g2_i1	6.29
TR23044|c0_g1_i3	31.5
TR23047|c0_g2_i1	24.24
TR23048|c0_g1_i1	19.11
TR23052|c0_g2_i1	121.66
TR23059|c0_g1_i3	18.26
TR2306|c0_g3_i1	11.33
TR23066|c0_g1_i1	17.02
TR2307|c0_g1_i1	76.68
TR23080|c0_g1_i1	13.41
TR23080|c0_g2_i1	0
TR23088|c0_g1_i3	362.49
TR23088|c0_g2_i1	1027.61
TR2309|c0_g1_i3	6.09
TR23092|c0_g1_i1	12.18
TR23095|c0_g1_i1	50.16
TR23099|c0_g1_i1	6.2
TR2310|c0_g1_i3	11.12
TR23102|c0_g1_i1	16.22
TR23104|c0_g1_i1	5.77
TR23105|c1_g2_i3	6.54
TR23106|c0_g1_i1	19.03
TR23106|c1_g1_i1	25.49
TR2311|c0_g1_i1	14.06
TR2312|c0_g4_i10	7.47
TR2312|c0_g4_i5	24.81
TR23121|c0_g1_i1	38.52
TR2313|c0_g1_i1	0.41
TR2313|c0_g1_i2	155.39
TR23131|c0_g1_i1	33.27
TR23132|c0_g2_i1	36.42
TR23134|c1_g1_i1	10.26
TR23135|c0_g1_i2	10.89
TR23138|c0_g1_i1	743.17
TR2314|c0_g1_i2	4.96
TR23144|c0_g1_i4	0
TR23144|c0_g1_i5	0
TR23151|c0_g1_i1	7.31
TR23152|c0_g1_i2	21.17
TR2316|c0_g1_i1	79.51
TR2316|c0_g1_i2	30.81
TR2316|c0_g1_i4	1.22
TR23163|c0_g3_i1	4.86
TR23163|c0_g4_i1	23.05
TR2317|c1_g1_i1	957.5
TR23174|c0_g1_i1	24.03
TR23174|c0_g2_i1	16.58
TR2318|c0_g1_i10	9.4
TR2318|c0_g1_i6	5.56
TR23182|c0_g2_i2	102.37
TR23182|c0_g2_i3	30.17
TR2320|c0_g1_i1	1.02
TR2320|c0_g5_i1	49.13
TR2320|c0_g5_i2	43.46
TR23204|c0_g1_i1	31.51
TR2321|c0_g1_i1	46.09
TR2321|c1_g1_i2	43.83
TR23211|c1_g1_i1	35.4
TR23211|c1_g1_i2	34.37
TR23222|c0_g1_i1	13.58
TR2323|c0_g1_i2	3.83
TR23231|c0_g1_i1	46.85
TR2324|c0_g1_i1	13.17
TR2324|c0_g1_i2	0.67
TR23247|c0_g3_i2	109.11
TR23249|c0_g1_i2	17.7
TR23249|c0_g1_i3	52.85
TR2325|c0_g1_i2	10.02
TR23253|c0_g1_i1	34.82
TR23257|c0_g1_i1	21.23
TR23258|c0_g1_i1	17.43
TR2326|c0_g1_i2	0
TR2326|c0_g1_i6	1.11
TR2326|c0_g1_i8	0
TR2327|c0_g2_i1	21.88
TR2327|c0_g4_i1	29.02
TR23274|c0_g1_i2	7.36
TR23278|c0_g1_i1	6.83
TR23279|c0_g1_i1	5.25
TR2328|c0_g1_i1	6.08
TR2328|c0_g1_i4	8.97
TR23282|c0_g1_i1	34.02
TR23283|c0_g1_i1	2.61
TR23283|c0_g1_i2	4.33
TR23285|c0_g1_i2	17.44
TR2329|c0_g2_i1	29.25
TR2329|c0_g3_i3	27.98
TR2329|c0_g3_i6	118.27
TR23294|c0_g1_i1	26.7
TR23296|c0_g1_i1	6.61
TR23299|c0_g1_i1	7.71
TR2330|c0_g1_i2	4.2
TR23300|c0_g1_i1	40.54
TR23302|c0_g1_i1	12.54
TR23304|c0_g1_i1	26.9
TR23316|c0_g1_i1	35.39
TR23317|c0_g2_i1	100.37
TR2332|c0_g1_i3	4.39
TR23326|c0_g1_i1	42.44
TR23329|c0_g1_i1	23.49
TR2333|c0_g1_i1	30.25
TR23335|c0_g1_i1	15.94
TR23337|c0_g1_i1	6.65
TR23337|c0_g2_i1	139.58
TR23348|c0_g1_i2	91.72
TR2335|c0_g1_i1	245.22
TR2335|c0_g2_i1	6.56
TR2335|c0_g4_i1	13.79
TR2336|c1_g1_i6	6.52
TR23374|c0_g1_i1	16.47
TR23376|c0_g3_i1	17.74
TR23376|c0_g4_i1	14.04
TR23379|c1_g1_i1	54.92
TR2338|c0_g1_i1	33.3
TR23382|c0_g1_i1	13.46
TR23384|c0_g1_i1	7.91
TR23395|c0_g1_i1	38.78
TR2340|c0_g1_i5	9.36
TR2340|c0_g1_i8	194.57
TR23408|c0_g1_i1	0.9
TR23408|c0_g1_i2	28.76
TR23408|c0_g1_i3	4.9
TR2341|c0_g1_i1	15.56
TR23413|c0_g1_i1	28
TR23415|c0_g1_i2	19.19
TR23426|c0_g1_i1	24.93
TR23426|c0_g2_i1	33.31
TR2343|c0_g2_i1	16.72
TR23439|c0_g1_i1	20.54
TR23442|c0_g1_i1	18.11
TR23446|c0_g1_i1	32.3
TR23447|c1_g1_i2	139.1
TR23447|c1_g1_i3	27.37
TR23448|c0_g1_i1	12.31
TR23450|c0_g1_i2	15.15
TR23453|c0_g1_i1	17.3
TR23454|c0_g2_i1	28.29
TR23456|c0_g1_i1	13.14
TR2346|c2_g2_i1	4.44
TR2346|c2_g3_i2	99.21
TR2346|c2_g3_i3	40.25
TR2346|c2_g3_i5	87.91
TR2346|c2_g3_i6	5.5
TR2346|c2_g3_i7	28.35
TR23462|c0_g1_i1	20.23
TR23463|c0_g1_i1	15.34
TR23469|c0_g1_i1	32.88
TR23473|c0_g1_i1	61.6
TR23476|c0_g1_i1	19.68
TR2348|c0_g1_i4	31.07
TR2348|c0_g1_i6	47.33
TR23480|c0_g1_i1	9.72
TR23488|c0_g2_i1	26.83
TR23489|c0_g1_i2	10.36
TR23489|c0_g1_i3	11.38
TR2349|c0_g1_i1	30.8
TR2349|c1_g1_i2	17.12
TR2349|c1_g1_i6	15.31
TR2349|c1_g1_i9	19.48
TR23491|c0_g1_i1	112.72
TR23491|c1_g1_i1	250.72
TR2350|c0_g2_i1	137.51
TR2350|c0_g2_i4	0
TR23503|c0_g1_i1	37.11
TR23503|c0_g1_i2	5.98
TR23503|c0_g2_i1	44.76
TR23508|c0_g2_i1	18.79
TR2351|c0_g1_i1	14.59
TR2351|c1_g1_i1	11.23
TR23510|c0_g1_i2	9.77
TR23511|c0_g2_i1	153.22
TR23512|c0_g1_i2	14.97
TR23516|c0_g1_i1	31.13
TR23519|c1_g1_i1	18.04
TR2352|c0_g1_i2	19.66
TR23520|c0_g1_i1	10.01
TR23525|c0_g1_i1	7.57
TR23530|c0_g1_i1	16.27
TR23533|c0_g1_i15	5.31
TR23533|c0_g1_i3	3.49
TR23533|c0_g1_i4	3.09
TR23533|c0_g1_i7	0.91
TR23533|c0_g1_i9	1.17
TR23539|c1_g1_i1	16.91
TR2354|c0_g1_i2	4.56
TR23545|c0_g2_i1	14.93
TR23547|c0_g1_i1	10.67
TR23563|c0_g1_i1	11.82
TR23563|c0_g1_i3	2.83
TR23566|c0_g1_i1	138.63
TR23584|c0_g1_i1	13.79
TR2359|c0_g3_i1	9.59
TR23595|c0_g1_i1	40.79
TR23596|c0_g1_i1	17.98
TR23598|c0_g1_i1	21.76
TR2360|c0_g1_i11	12.72
TR2360|c0_g1_i8	0.6
TR23600|c0_g1_i2	17.22
TR23601|c0_g1_i1	23.38
TR23601|c0_g2_i1	24.36
TR23609|c0_g1_i2	34.16
TR23609|c0_g2_i1	12.69
TR2361|c2_g1_i1	12.88
TR2361|c2_g1_i2	42.96
TR2361|c2_g1_i7	32.63
TR23610|c0_g1_i1	14.48
TR23619|c0_g1_i1	21.86
TR2362|c0_g2_i1	7.56
TR2362|c0_g2_i3	7.98
TR23621|c0_g1_i1	49.06
TR23627|c0_g1_i1	6.03
TR2363|c1_g1_i4	6.94
TR23638|c0_g1_i1	45.87
TR23644|c0_g3_i1	11.48
TR23657|c0_g1_i1	37.12
TR23660|c0_g2_i1	11.43
TR23660|c0_g3_i1	18.69
TR23664|c0_g1_i1	28.44
TR2367|c0_g1_i1	26.7
TR2368|c0_g1_i1	147.45
TR23681|c0_g1_i1	58.65
TR23682|c1_g1_i2	31.21
TR23685|c0_g1_i1	21.52
TR2369|c0_g5_i1	5.92
TR23705|c0_g1_i1	17.07
TR23708|c0_g1_i1	34.02
TR23719|c0_g3_i1	98
TR2372|c0_g1_i8	4.98
TR23720|c0_g1_i1	19.45
TR23721|c0_g1_i1	25.36
TR23728|c0_g1_i1	96.57
TR23728|c0_g2_i1	19.68
TR2373|c0_g1_i1	23.58
TR2373|c0_g1_i2	39.61
TR23730|c0_g2_i1	28.84
TR23743|c0_g1_i1	14.78
TR23758|c0_g1_i1	15.46
TR23761|c0_g1_i2	8.18
TR23762|c0_g1_i1	30.03
TR23768|c0_g1_i1	53.25
TR23768|c0_g2_i1	0
TR23768|c0_g3_i1	0
TR23770|c0_g1_i1	38.3
TR23770|c0_g3_i1	18.54
TR23773|c0_g1_i1	15.05
TR23778|c0_g1_i2	73.78
TR2378|c0_g1_i5	4.53
TR23783|c0_g1_i1	27.68
TR23786|c1_g1_i1	25.76
TR23786|c1_g1_i2	15.88
TR23786|c1_g2_i1	0
TR23787|c1_g1_i1	51.27
TR23787|c1_g1_i2	10.9
TR23787|c1_g1_i3	157.76
TR23792|c0_g1_i1	42.25
TR2381|c0_g1_i1	8.45
TR2381|c0_g1_i2	5.22
TR23811|c0_g2_i1	9.31
TR23814|c0_g1_i3	16.31
TR2382|c0_g1_i1	214.4
TR2382|c0_g1_i2	34.09
TR23821|c0_g1_i1	36.77
TR23822|c0_g1_i1	11.73
TR23823|c0_g1_i1	468.55
TR2383|c0_g1_i1	290.33
TR2383|c0_g3_i1	1181.82
TR2383|c0_g5_i1	406.4
TR2383|c0_g6_i1	1550.01
TR23832|c2_g1_i1	258.01
TR23833|c0_g1_i1	43.05
TR23833|c0_g2_i1	26.76
TR23833|c0_g2_i2	8.17
TR2384|c0_g3_i5	8.1
TR2385|c0_g1_i1	36.79
TR2385|c0_g1_i4	97.43
TR2385|c0_g2_i1	22.78
TR23853|c0_g1_i2	17.01
TR23854|c0_g3_i2	15.73
TR2386|c0_g1_i2	5.14
TR23862|c0_g1_i2	174.48
TR23862|c0_g2_i1	115.08
TR23863|c0_g1_i2	17.28
TR2387|c0_g1_i1	15.67
TR23871|c0_g2_i1	30.36
TR23872|c0_g1_i2	7.32
TR2389|c0_g1_i1	52.28
TR23898|c0_g1_i3	27.07
TR2390|c0_g1_i3	20.8
TR2390|c0_g1_i4	52.83
TR23904|c0_g1_i2	11.37
TR23910|c0_g1_i1	46.38
TR2392|c0_g2_i1	6.5
TR23924|c0_g1_i1	10.36
TR23928|c0_g1_i2	45.09
TR23928|c0_g1_i6	0
TR2393|c0_g1_i1	85.56
TR2393|c0_g1_i2	0
TR23931|c0_g1_i1	31.45
TR23935|c0_g1_i1	55.59
TR23938|c0_g1_i2	3.77
TR2394|c0_g2_i10	9.8
TR23940|c0_g1_i1	176.48
TR23947|c0_g1_i1	10.43
TR23947|c0_g3_i2	22.26
TR23951|c0_g1_i1	8.28
TR2396|c0_g1_i1	14.4
TR2396|c0_g1_i4	3.75
TR23965|c0_g1_i1	15.18
TR23969|c1_g1_i1	35.66
TR2397|c0_g1_i2	8.09
TR2397|c0_g1_i3	17.27
TR23971|c0_g1_i1	18.88
TR23972|c0_g1_i1	8.96
TR23973|c0_g1_i1	24.93
TR2398|c0_g1_i1	200.36
TR2398|c0_g1_i2	125.63
TR2398|c0_g1_i3	27.21
TR23983|c0_g1_i2	15.64
TR2399|c0_g1_i2	123.19
TR2399|c0_g1_i3	59.87
TR23990|c0_g1_i2	12.47
TR23996|c0_g1_i2	22.04
TR23997|c0_g1_i1	24.26
TR23998|c0_g1_i2	22.3
TR24003|c0_g1_i1	29.83
TR24004|c0_g1_i1	19.35
TR24005|c0_g1_i1	9.12
TR24008|c0_g1_i2	11.38
TR2401|c0_g1_i2	14.69
TR2401|c0_g2_i1	19.97
TR2401|c0_g3_i2	45.85
TR2401|c0_g3_i3	13.32
TR24014|c0_g1_i1	34.8
TR24016|c0_g1_i1	14.56
TR24021|c1_g1_i1	10.5
TR24033|c0_g1_i1	8.25
TR24034|c0_g1_i1	182.51
TR24035|c1_g2_i2	7.6
TR2404|c0_g1_i1	27.27
TR24046|c0_g1_i1	31.22
TR24051|c0_g1_i1	10.15
TR24054|c0_g1_i1	10.16
TR24065|c0_g1_i1	7.05
TR2407|c0_g1_i2	1.09
TR24070|c0_g1_i1	7.05
TR24075|c0_g1_i2	14.03
TR2408|c0_g1_i11	5.75
TR2408|c0_g1_i5	10.47
TR2408|c0_g1_i6	2.3
TR24086|c0_g1_i1	12.56
TR24088|c0_g1_i1	23.63
TR2409|c0_g4_i2	13.29
TR24093|c0_g1_i1	15.47
TR24099|c0_g1_i1	13.32
TR2410|c0_g1_i2	25.06
TR2410|c0_g1_i3	8.54
TR24115|c0_g1_i1	8.1
TR24121|c0_g1_i1	50.2
TR24124|c0_g1_i1	68.29
TR24124|c0_g1_i2	3.07
TR24127|c0_g1_i1	10.18
TR2413|c0_g1_i2	42.92
TR2413|c0_g6_i1	28.84
TR2413|c0_g7_i1	16.32
TR24130|c0_g2_i1	1.5
TR24130|c0_g2_i3	45.8
TR24132|c0_g1_i1	10.81
TR24134|c0_g1_i3	12.96
TR2414|c0_g1_i1	0
TR2414|c0_g1_i2	99.54
TR2414|c0_g2_i1	83.78
TR2414|c0_g2_i2	0
TR24140|c0_g1_i1	103.91
TR24143|c0_g1_i1	43.57
TR2415|c4_g1_i1	6.05
TR2415|c4_g2_i1	55.02
TR24150|c0_g1_i2	6.12
TR24155|c0_g1_i1	22.14
TR24158|c0_g1_i1	15.12
TR2416|c0_g1_i1	89.87
TR2416|c0_g2_i1	157.62
TR2416|c0_g5_i1	156.06
TR2416|c0_g5_i2	87.62
TR24161|c0_g1_i1	4.36
TR24164|c0_g1_i1	19.38
TR24165|c0_g1_i1	58.46
TR2417|c0_g1_i2	39.69
TR24176|c1_g2_i2	13.5
TR24177|c3_g1_i1	76.63
TR24180|c0_g1_i1	512.79
TR24180|c2_g1_i1	32.37
TR24180|c2_g1_i2	28.51
TR24180|c2_g2_i1	38.36
TR24188|c0_g1_i1	30.87
TR24199|c0_g1_i1	13.12
TR24202|c1_g1_i2	76.75
TR24204|c0_g1_i1	26.14
TR24205|c0_g1_i1	25.19
TR24206|c0_g1_i1	27.31
TR24207|c0_g1_i1	21.49
TR24211|c0_g2_i1	33.74
TR24211|c0_g2_i3	0.26
TR24211|c0_g2_i4	2.6
TR24211|c0_g4_i1	0
TR24211|c0_g5_i1	2.69
TR24214|c0_g1_i1	24.36
TR24221|c0_g1_i3	9.52
TR2424|c0_g1_i1	18.26
TR2424|c0_g1_i4	0
TR2424|c0_g1_i5	10.8
TR2425|c0_g2_i2	0
TR2425|c0_g2_i3	244.95
TR2425|c0_g2_i7	0
TR2425|c0_g3_i2	99.58
TR24252|c1_g1_i1	231.98
TR2426|c1_g1_i1	21.52
TR2426|c1_g1_i2	15.58
TR24262|c0_g1_i2	124.55
TR24264|c0_g1_i1	27.64
TR24269|c0_g1_i1	28.45
TR2427|c0_g1_i1	29.08
TR24270|c0_g1_i1	24.16
TR24272|c0_g1_i1	31.51
TR24278|c0_g1_i1	6.78
TR2428|c0_g1_i1	26.1
TR2428|c0_g2_i2	94.08
TR2428|c0_g3_i1	1.64
TR24286|c0_g1_i1	28.11
TR24286|c0_g2_i1	17.28
TR24288|c0_g1_i1	4.4
TR2429|c0_g2_i1	76.21
TR2429|c0_g2_i3	66.65
TR24290|c0_g1_i3	33.98
TR24292|c0_g1_i1	10.43
TR24293|c0_g1_i1	0
TR24293|c0_g1_i2	5.22
TR24299|c0_g2_i1	44.46
TR2430|c0_g1_i2	32.71
TR2430|c0_g1_i4	42.87
TR2430|c0_g1_i5	29.95
TR2430|c0_g1_i6	23.63
TR2430|c0_g1_i7	1.38
TR24301|c0_g1_i1	26.66
TR24308|c0_g1_i1	6.8
TR2431|c1_g1_i1	60.94
TR2431|c1_g1_i2	33.77
TR24324|c0_g1_i1	14.03
TR24325|c0_g1_i3	41.97
TR24331|c0_g1_i1	10.64
TR24331|c0_g2_i1	19.44
TR24332|c0_g1_i1	12.69
TR24334|c0_g1_i1	69.72
TR24342|c2_g1_i1	65.01
TR2435|c0_g2_i1	93.16
TR2435|c0_g2_i2	230.3
TR24353|c0_g2_i1	119.2
TR24354|c0_g1_i2	69.62
TR24357|c0_g1_i1	18.97
TR24362|c0_g1_i1	396.06
TR24367|c1_g1_i1	11.49
TR2437|c0_g1_i1	67.07
TR24370|c0_g1_i1	18.67
TR2438|c0_g1_i1	40.66
TR24381|c0_g1_i1	55.61
TR2439|c0_g1_i1	68.21
TR2439|c0_g1_i2	4.54
TR2439|c0_g1_i3	34.97
TR24390|c0_g1_i3	22.76
TR24396|c0_g1_i1	15.25
TR24397|c0_g1_i1	18.21
TR24397|c1_g1_i2	13.76
TR24399|c0_g2_i1	102.21
TR2440|c0_g1_i1	103.89
TR2440|c0_g1_i3	76.66
TR24400|c0_g1_i2	36.13
TR24400|c1_g1_i2	27.25
TR24401|c0_g2_i1	16.91
TR2441|c0_g1_i1	20.87
TR2441|c0_g1_i3	46.18
TR24410|c0_g1_i1	24.43
TR24412|c1_g1_i1	12.09
TR24423|c0_g1_i1	22.87
TR24424|c0_g1_i1	11.75
TR24427|c0_g1_i3	3.89
TR2443|c1_g3_i5	51.76
TR2443|c1_g3_i8	3.06
TR2443|c1_g4_i1	68.58
TR24434|c0_g1_i1	12.68
TR2444|c0_g1_i2	51.28
TR2445|c0_g1_i1	10.37
TR2445|c0_g1_i2	48.34
TR2445|c0_g1_i3	39.36
TR2446|c0_g2_i2	8.24
TR24491|c0_g1_i1	21.69
TR24494|c0_g2_i1	9.08
TR24496|c0_g1_i1	23.54
TR24499|c0_g1_i2	3.35
TR24499|c0_g1_i3	5.19
TR24507|c0_g1_i1	22.82
TR24509|c0_g1_i1	27.74
TR24514|c0_g1_i2	26.42
TR24516|c0_g1_i2	8.94
TR24519|c0_g1_i1	13.56
TR24521|c0_g1_i1	41.58
TR24521|c0_g1_i2	69.21
TR24522|c0_g1_i1	6.96
TR24523|c0_g1_i1	14.21
TR24523|c0_g1_i2	46.7
TR24525|c0_g1_i1	29.7
TR24532|c0_g1_i1	7.18
TR24537|c0_g1_i1	10.44
TR24537|c0_g1_i2	28.5
TR24538|c0_g1_i1	31.34
TR24538|c0_g1_i2	4.3
TR2454|c1_g1_i1	11.26
TR2454|c1_g1_i3	44.63
TR2454|c1_g1_i6	2.11
TR24541|c0_g3_i1	13.54
TR24545|c0_g1_i1	269.09
TR2455|c0_g1_i1	17.27
TR24551|c0_g1_i1	18.56
TR24551|c1_g1_i3	14.28
TR24552|c1_g1_i5	14.1
TR24552|c1_g2_i1	2.49
TR24555|c0_g1_i1	6.22
TR24559|c1_g1_i1	20.36
TR24563|c0_g1_i2	19.44
TR24566|c0_g1_i2	11.26
TR2458|c0_g1_i1	19.99
TR24580|c0_g1_i1	14.18
TR24582|c0_g1_i1	63.15
TR24587|c0_g1_i1	11.51
TR24588|c0_g1_i1	63.07
TR24589|c0_g1_i1	12.38
TR2459|c0_g1_i1	11.26
TR2459|c0_g1_i2	12.86
TR24593|c0_g1_i8	1577.99
TR24601|c0_g2_i1	54.43
TR24609|c0_g1_i1	27.73
TR2462|c0_g1_i3	14.7
TR2462|c0_g1_i6	62.71
TR2462|c0_g1_i7	8.44
TR2462|c0_g3_i1	29.69
TR2462|c0_g3_i2	5.62
TR24620|c0_g1_i1	17.23
TR24620|c0_g1_i3	20.1
TR24627|c1_g1_i1	29.79
TR24627|c1_g1_i2	26.45
TR24627|c1_g1_i5	1.47
TR2463|c0_g1_i1	44.32
TR24631|c0_g1_i1	28.09
TR24638|c0_g1_i1	6.91
TR2464|c0_g1_i3	0.83
TR24647|c0_g1_i1	11.4
TR24648|c0_g1_i1	54.73
TR24649|c0_g1_i1	10.29
TR2465|c0_g1_i1	102.81
TR2465|c0_g1_i2	10.86
TR2465|c0_g1_i3	31.72
TR2465|c0_g1_i4	21.26
TR2465|c0_g1_i7	23
TR24651|c0_g1_i1	12.53
TR24662|c0_g1_i1	11.99
TR24668|c0_g1_i1	18.27
TR24671|c0_g3_i2	4.58
TR24674|c0_g1_i1	4.81
TR2468|c1_g3_i1	7.34
TR2468|c1_g3_i2	4.85
TR24691|c1_g1_i1	21.35
TR24694|c0_g2_i1	19.54
TR2470|c1_g1_i4	13.25
TR2470|c1_g1_i8	4.95
TR24701|c0_g1_i1	55.26
TR24701|c0_g2_i1	62.13
TR24701|c0_g2_i2	10.86
TR24708|c0_g2_i1	4.97
TR2471|c0_g1_i2	156.03
TR2471|c0_g1_i4	32.61
TR24710|c0_g1_i1	36.05
TR24712|c0_g1_i1	4.17
TR24716|c0_g1_i1	11.05
TR24716|c0_g1_i2	14.44
TR24716|c0_g1_i3	5.81
TR24719|c0_g1_i1	12.91
TR24719|c1_g1_i1	25.31
TR24719|c1_g3_i1	20.99
TR24722|c0_g1_i1	9.41
TR24723|c0_g1_i1	35.01
TR2473|c0_g1_i2	0
TR2473|c0_g1_i3	7.58
TR24732|c0_g1_i1	8.5
TR24734|c0_g1_i1	22.46
TR24734|c0_g2_i1	0
TR24737|c0_g1_i1	16.15
TR24743|c0_g1_i1	53.02
TR24743|c0_g2_i1	96.21
TR2475|c0_g2_i1	44.79
TR2475|c0_g3_i2	9
TR24755|c0_g1_i2	44.44
TR24759|c0_g1_i1	31.74
TR24769|c0_g1_i3	16.05
TR24769|c0_g1_i4	0
TR2477|c0_g2_i1	11
TR2477|c0_g2_i3	28.08
TR24786|c0_g1_i1	6.6
TR2479|c0_g1_i1	14.17
TR2479|c0_g1_i3	11.77
TR24790|c0_g2_i1	12.04
TR24792|c0_g1_i2	438.3
TR24792|c0_g1_i3	56.93
TR24792|c0_g2_i1	73.77
TR24793|c0_g1_i1	5.14
TR24795|c0_g1_i2	23.72
TR24795|c0_g1_i3	86.98
TR24798|c0_g1_i3	470.42
TR24798|c0_g2_i1	619.79
TR24798|c0_g2_i3	130.1
TR24802|c0_g1_i3	9.59
TR24806|c0_g4_i2	15.18
TR24806|c0_g5_i2	17.56
TR24806|c0_g6_i1	5.02
TR24808|c0_g1_i1	9.05
TR24809|c0_g1_i1	23.16
TR24813|c0_g1_i3	16.78
TR24814|c1_g1_i4	29.47
TR24814|c1_g1_i5	67.87
TR24815|c0_g1_i1	23.74
TR24831|c0_g1_i1	11.82
TR24832|c0_g1_i1	23.43
TR24837|c0_g1_i1	20.3
TR24848|c0_g1_i3	20.48
TR2485|c3_g1_i2	140.96
TR24852|c0_g1_i2	9.42
TR24857|c0_g1_i1	99.64
TR2486|c0_g1_i1	22.64
TR2486|c0_g1_i2	7.97
TR2486|c0_g2_i3	34.82
TR2486|c0_g2_i4	7.83
TR2486|c0_g3_i1	14.92
TR24870|c0_g2_i1	17.28
TR24871|c0_g1_i1	18.52
TR24887|c0_g1_i1	20.48
TR24889|c0_g1_i2	3.25
TR24889|c0_g1_i3	19.33
TR24901|c0_g1_i1	346.08
TR24902|c0_g1_i1	46.72
TR24905|c0_g1_i1	19.13
TR2491|c0_g1_i5	57.3
TR24911|c0_g1_i4	18.2
TR2492|c0_g2_i2	27.92
TR24921|c0_g1_i1	16.59
TR24924|c1_g2_i1	17.57
TR24926|c0_g1_i1	12.81
TR24947|c0_g1_i1	52.74
TR24949|c0_g1_i1	13.12
TR24949|c0_g1_i2	10.48
TR24951|c0_g1_i2	2.35
TR24956|c0_g1_i1	17.32
TR24961|c0_g1_i1	16.8
TR24962|c0_g1_i1	50.17
TR24962|c0_g2_i1	49.71
TR24964|c0_g1_i2	6.29
TR24966|c0_g1_i1	18.4
TR24968|c1_g1_i1	76.11
TR24968|c1_g2_i2	54.04
TR24969|c0_g1_i1	29.59
TR2497|c0_g3_i1	3000.72
TR2497|c0_g3_i3	1447.59
TR2497|c0_g3_i5	196.03
TR2497|c0_g3_i6	581.1
TR2497|c0_g4_i1	136.85
TR24979|c0_g1_i1	36
TR2498|c0_g1_i1	17.99
TR2498|c0_g2_i1	23.81
TR2498|c0_g2_i2	4.21
TR24980|c0_g1_i1	5.87
TR24981|c0_g1_i2	100.06
TR24982|c0_g1_i1	22.04
TR24987|c0_g1_i1	8.08
TR24988|c0_g1_i5	7.71
TR24988|c0_g1_i6	14.47
TR24989|c0_g1_i1	18.04
TR2499|c0_g1_i3	59.8
TR24994|c0_g1_i1	10.35
TR2500|c0_g1_i4	7.31
TR25002|c0_g2_i3	32.43
TR25003|c0_g1_i1	33.78
TR25017|c0_g1_i1	125
TR25017|c0_g1_i3	7.94
TR25018|c0_g1_i1	5.96
TR2502|c0_g1_i1	34.58
TR25020|c0_g1_i1	13.89
TR25021|c0_g1_i1	14.73
TR25024|c0_g1_i3	154.41
TR25024|c0_g1_i4	0
TR25026|c0_g2_i1	6.8
TR25031|c0_g1_i1	19.97
TR25033|c0_g1_i2	28.72
TR25034|c0_g1_i1	0
TR25034|c0_g1_i2	31.62
TR25039|c0_g1_i3	43.89
TR2504|c0_g1_i1	55.86
TR25043|c0_g1_i1	28.03
TR25043|c1_g1_i1	10.62
TR25050|c0_g1_i1	9.64
TR25054|c0_g2_i1	11.53
TR25056|c0_g1_i1	55.08
TR2506|c0_g2_i1	33.32
TR25060|c0_g1_i1	30.55
TR25061|c0_g1_i1	10.57
TR25065|c0_g2_i1	9.83
TR25068|c0_g1_i1	7.64
TR25068|c1_g1_i2	19.59
TR2507|c0_g4_i1	13.84
TR25083|c0_g1_i3	0
TR25088|c0_g1_i1	39.51
TR25092|c0_g1_i1	96.56
TR25092|c0_g2_i1	14.13
TR25093|c1_g3_i1	1773.11
TR25098|c0_g1_i1	8.81
TR2510|c0_g2_i4	44.26
TR2510|c0_g3_i1	35.17
TR25102|c1_g1_i1	8.35
TR25109|c0_g1_i1	17.51
TR25109|c0_g3_i1	7.43
TR25110|c1_g1_i1	51.03
TR25115|c0_g1_i2	17.32
TR25115|c0_g1_i4	11.68
TR2512|c1_g1_i1	7.65
TR25121|c0_g1_i1	75.34
TR25123|c0_g1_i1	7.81
TR25128|c0_g2_i3	1.45
TR25128|c0_g2_i4	15.83
TR2513|c1_g1_i1	24.94
TR2513|c1_g2_i1	13.38
TR25134|c0_g1_i1	23.28
TR2514|c1_g10_i1	30.72
TR2514|c1_g10_i4	3.14
TR2514|c1_g10_i5	12.47
TR2514|c1_g10_i6	12.48
TR2514|c1_g4_i1	15.53
TR2514|c1_g4_i2	25.97
TR2514|c1_g4_i3	3.24
TR2514|c1_g5_i1	62.19
TR2514|c1_g9_i1	3.42
TR2514|c1_g9_i2	16.28
TR2514|c1_g9_i3	33.34
TR25142|c0_g1_i1	26.48
TR25142|c0_g1_i4	122.74
TR25153|c0_g1_i1	6.91
TR25156|c0_g1_i1	102.27
TR2516|c0_g1_i3	28.66
TR25160|c0_g1_i4	3.91
TR25163|c0_g1_i1	35.1
TR2519|c0_g1_i1	38.45
TR25191|c0_g1_i1	16.27
TR25193|c0_g1_i1	4.05
TR25193|c0_g1_i3	28.19
TR25197|c0_g1_i1	21.89
TR25198|c0_g1_i1	26.84
TR25200|c0_g2_i1	3.69
TR25205|c0_g1_i1	15.34
TR25208|c0_g1_i2	11.42
TR2521|c0_g10_i2	59.51
TR2521|c0_g2_i1	96.85
TR2521|c0_g3_i2	87.56
TR2521|c0_g3_i3	180.86
TR2521|c0_g3_i5	91.39
TR2521|c0_g4_i2	28.83
TR25211|c0_g1_i1	19.96
TR25211|c0_g1_i2	21.77
TR25213|c0_g1_i1	5.66
TR25214|c0_g1_i4	3.22
TR25216|c0_g1_i1	58.28
TR25216|c0_g2_i2	26.13
TR25218|c0_g1_i2	34.65
TR25222|c0_g1_i1	13.27
TR2523|c0_g1_i2	48.76
TR2523|c0_g1_i8	67.42
TR2523|c0_g3_i2	652.69
TR25232|c0_g1_i1	39.48
TR25236|c0_g1_i2	22.77
TR25240|c0_g1_i1	8.51
TR25247|c0_g1_i2	5.48
TR25249|c0_g1_i1	298.38
TR25249|c0_g6_i1	769.51
TR2525|c0_g1_i1	6.7
TR2526|c0_g2_i3	0.84
TR25263|c0_g1_i4	155.15
TR25268|c0_g1_i1	57.46
TR25269|c0_g1_i1	7.29
TR25270|c0_g1_i1	6.15
TR25272|c0_g1_i1	218.58
TR25272|c0_g3_i1	56.68
TR25279|c0_g1_i1	25.05
TR2528|c3_g1_i3	6.6
TR25281|c0_g1_i1	5.64
TR25285|c0_g1_i1	20.2
TR25291|c0_g1_i1	9.91
TR25292|c0_g1_i4	3.1
TR25294|c0_g1_i1	23.01
TR25295|c0_g2_i1	14.06
TR2530|c0_g1_i1	10.81
TR2530|c1_g4_i1	15.11
TR2530|c1_g4_i2	11.95
TR2530|c1_g4_i3	11.27
TR25304|c0_g1_i1	12.97
TR25304|c1_g1_i1	21.35
TR25306|c1_g1_i1	468.97
TR25306|c1_g1_i2	115.87
TR25310|c0_g1_i1	7.5
TR25311|c0_g1_i2	10.47
TR25313|c0_g1_i1	217.85
TR2532|c0_g4_i1	53.14
TR2532|c0_g4_i2	19.17
TR25320|c0_g1_i1	10.64
TR25321|c0_g1_i2	23.6
TR25322|c0_g1_i1	38.93
TR25323|c0_g1_i1	38.23
TR25324|c0_g1_i1	31.01
TR25328|c0_g1_i2	21.8
TR25329|c0_g1_i2	18.78
TR25329|c0_g1_i3	5.06
TR25334|c0_g1_i3	4.36
TR25338|c0_g1_i1	11.17
TR2534|c0_g3_i1	14.76
TR2534|c0_g3_i2	3.59
TR2534|c0_g4_i1	20.86
TR2534|c0_g4_i3	8.81
TR25356|c0_g2_i3	22.16
TR25357|c0_g1_i3	12.36
TR25358|c0_g1_i5	13.84
TR2536|c0_g1_i2	14.48
TR25364|c0_g1_i1	13.82
TR25369|c0_g1_i1	12.16
TR2537|c1_g1_i1	48.84
TR25373|c1_g2_i1	11.5
TR25373|c1_g2_i3	1.69
TR25374|c0_g1_i2	18
TR25377|c0_g1_i1	10.67
TR25379|c0_g2_i1	14.49
TR25381|c0_g1_i2	12.43
TR25383|c0_g1_i3	14.68
TR25383|c0_g1_i4	71.46
TR25384|c0_g1_i2	7.52
TR2540|c1_g3_i1	21.54
TR2540|c2_g1_i1	18.33
TR2541|c0_g2_i2	9.29
TR2542|c1_g3_i2	39.82
TR2543|c1_g1_i11	9.01
TR2543|c1_g1_i12	23.03
TR2543|c1_g1_i14	0
TR2543|c1_g1_i3	10.73
TR2543|c1_g1_i4	1.72
TR2544|c0_g1_i10	5.4
TR2544|c0_g1_i2	18.58
TR2544|c0_g1_i6	16.29
TR2544|c0_g5_i1	14.69
TR2545|c0_g1_i1	0
TR2545|c0_g2_i1	117.31
TR2545|c0_g2_i2	215.84
TR2545|c0_g2_i4	8.24
TR2545|c1_g1_i1	139.39
TR2545|c1_g2_i1	33.33
TR2545|c1_g4_i1	41.39
TR2545|c1_g4_i2	146.92
TR2546|c0_g2_i1	8.99
TR2546|c0_g3_i1	10.54
TR2546|c0_g3_i2	9.58
TR2547|c0_g1_i1	356.69
TR2548|c0_g2_i1	6.26
TR2548|c0_g3_i2	7.23
TR2548|c0_g4_i1	31.85
TR25484|c0_g1_i2	63.32
TR25489|c0_g1_i1	13.47
TR2549|c0_g1_i1	123.81
TR2549|c0_g2_i1	87.77
TR25502|c0_g3_i1	184.1
TR25502|c0_g3_i2	319.46
TR25506|c2_g1_i1	22.27
TR25506|c2_g3_i1	65.9
TR2551|c0_g1_i4	34.78
TR25510|c1_g1_i2	3.55
TR25512|c0_g1_i2	10.73
TR25514|c0_g1_i1	20.02
TR25514|c0_g1_i2	87.12
TR25514|c0_g2_i1	79.98
TR25517|c0_g1_i3	24.14
TR25519|c0_g2_i2	13.54
TR25520|c0_g1_i2	6.32
TR25521|c0_g1_i1	169.31
TR25522|c0_g1_i1	16.29
TR25525|c1_g2_i1	90.47
TR25531|c0_g1_i2	5.39
TR25533|c0_g1_i1	14.78
TR25536|c0_g1_i1	16.88
TR25537|c0_g1_i1	12.6
TR2554|c0_g1_i3	5.24
TR25544|c1_g1_i1	36.91
TR25545|c0_g1_i2	18.41
TR25551|c0_g1_i1	6.63
TR25553|c0_g1_i1	16.65
TR25554|c0_g1_i1	19.54
TR25557|c0_g1_i1	37.38
TR25557|c0_g1_i2	110.03
TR25559|c0_g1_i1	22.78
TR2556|c1_g1_i1	13.23
TR2556|c1_g2_i1	39.91
TR25564|c0_g1_i1	6.11
TR25568|c0_g1_i1	14.2
TR25569|c0_g3_i1	24.8
TR25571|c0_g1_i1	7.43
TR25573|c1_g1_i2	70.15
TR25573|c1_g1_i4	123.88
TR25575|c0_g1_i1	420.05
TR25577|c0_g1_i1	15.47
TR25578|c0_g2_i1	610.53
TR25586|c0_g1_i1	37.31
TR25586|c1_g1_i1	12.97
TR25589|c0_g1_i1	111.02
TR2559|c1_g1_i2	64.68
TR2559|c2_g1_i1	28.22
TR2559|c2_g2_i1	9.71
TR2559|c2_g6_i1	54.25
TR25597|c0_g1_i2	16.84
TR25598|c0_g2_i1	9.39
TR2560|c1_g1_i1	11.86
TR25604|c0_g1_i1	28.22
TR25605|c0_g1_i1	3.17
TR25605|c0_g1_i2	16.92
TR2561|c0_g1_i2	11.24
TR2561|c0_g1_i3	13.22
TR25613|c0_g1_i1	6.05
TR25614|c0_g1_i1	6.5
TR25616|c0_g1_i2	17.23
TR25617|c0_g1_i1	79.01
TR25617|c0_g2_i1	24.53
TR25629|c0_g2_i1	4.83
TR25629|c0_g2_i2	13.57
TR2563|c0_g1_i1	115.81
TR2563|c0_g2_i1	6.14
TR2563|c0_g4_i1	130.33
TR2563|c0_g5_i1	5.9
TR2563|c0_g6_i1	20.53
TR2563|c0_g7_i2	76.85
TR25633|c0_g1_i1	79.62
TR25636|c0_g1_i10	5.72
TR25636|c0_g1_i4	21.86
TR2564|c0_g1_i1	37.71
TR2564|c0_g1_i4	4.91
TR2564|c0_g1_i5	55.42
TR25647|c1_g1_i1	26.51
TR25647|c1_g1_i2	7.6
TR2565|c0_g1_i1	27.03
TR2565|c0_g2_i1	2.1
TR25658|c0_g1_i1	7.28
TR25658|c0_g1_i2	46.45
TR25658|c0_g2_i1	17.41
TR25659|c0_g1_i1	217.73
TR25659|c0_g5_i1	254.47
TR2566|c0_g1_i3	0
TR25662|c0_g1_i1	10.1
TR25670|c0_g1_i1	299.44
TR25672|c1_g3_i1	10.63
TR25676|c0_g2_i1	18.14
TR2568|c0_g1_i1	42.9
TR25681|c0_g1_i2	38.39
TR25692|c0_g1_i1	41.41
TR25693|c0_g1_i1	2.3
TR25693|c0_g2_i1	26.08
TR25693|c0_g2_i2	26.29
TR25696|c0_g1_i2	13.16
TR2570|c0_g1_i14	8.3
TR25701|c4_g3_i1	22.12
TR25702|c0_g1_i1	17.42
TR25704|c0_g1_i1	185.93
TR2571|c0_g1_i3	59.05
TR2571|c0_g1_i5	103.16
TR25715|c0_g1_i1	0.6
TR25715|c0_g1_i2	5.29
TR2572|c1_g2_i4	2.71
TR2572|c1_g2_i5	6.59
TR2572|c1_g3_i2	13.32
TR25722|c1_g1_i3	24.68
TR25723|c0_g1_i1	34.54
TR25726|c0_g1_i1	5.58
TR25730|c0_g1_i2	10.16
TR25732|c0_g1_i1	4.02
TR25736|c0_g1_i1	9.07
TR25736|c1_g1_i1	8.64
TR25741|c0_g1_i3	32.97
TR25746|c0_g1_i1	96.19
TR25746|c0_g1_i3	37.27
TR25747|c0_g3_i2	12.58
TR2575|c0_g3_i1	82.29
TR2575|c0_g3_i2	33.98
TR2575|c0_g6_i1	52.05
TR25753|c0_g2_i1	4.46
TR25756|c0_g1_i1	6.37
TR25762|c0_g1_i2	6.67
TR25766|c0_g1_i1	37.83
TR2577|c0_g2_i1	143.03
TR2577|c0_g2_i3	0
TR25779|c0_g1_i1	8.67
TR25779|c0_g1_i2	0
TR25782|c0_g1_i2	0.62
TR25782|c0_g1_i3	44.12
TR25787|c1_g1_i1	9.18
TR25789|c0_g1_i1	31.19
TR25790|c0_g1_i1	18.7
TR25791|c0_g1_i3	4.86
[truncated: 65,771 more rows]

## Sheet: F1
F1	FPKM
TR1002|c0_g1_i1	28.96
TR10112|c0_g1_i1	10.31
TR10224|c0_g1_i1	20.78
TR10233|c0_g1_i1	74.13
TR10273|c0_g1_i1	17.75
TR1033|c0_g1_i1	32.36
TR10332|c0_g1_i1	30.78
TR10370|c0_g2_i1	21.9
TR1051|c0_g1_i1	36.79
TR10582|c0_g1_i1	17.75
TR10620|c1_g1_i1	41.51
TR1064|c0_g1_i1	20.61
TR1073|c0_g1_i1	23.27
TR10809|c0_g1_i1	45.88
TR10833|c0_g1_i1	35.85
TR10841|c0_g1_i1	12.16
TR11017|c0_g1_i1	17.08
TR1105|c0_g1_i1	75.11
TR1107|c0_g1_i1	27.57
TR11088|c0_g1_i1	27.33
TR11094|c0_g1_i1	22.63
TR11161|c0_g1_i1	21.05
TR11233|c0_g1_i1	98.84
TR11284|c0_g1_i1	61.32
TR11454|c0_g1_i1	52.3
TR11608|c0_g1_i1	10.15
TR1170|c0_g1_i1	49.2
TR12140|c0_g1_i1	25.39
TR1215|c0_g1_i1	23.94
TR12208|c0_g1_i1	50.78
TR12213|c0_g2_i1	17.75
TR1225|c0_g1_i1	20.3
TR12295|c0_g1_i1	33.56
TR12459|c0_g1_i1	12.02
TR12468|c0_g1_i1	15.57
TR12479|c0_g1_i1	20.6
TR1251|c0_g1_i1	29.22
TR12667|c0_g1_i1	35.17
TR12669|c0_g1_i1	29.25
TR12715|c0_g1_i1	40.57
TR1281|c0_g1_i1	13.58
TR12856|c0_g1_i1	180.88
TR12868|c0_g1_i1	40.55
TR12900|c0_g1_i1	96.92
TR12958|c0_g1_i1	13.11
TR12988|c0_g1_i1	11.91
TR1304|c0_g1_i1	69.66
TR1306|c0_g1_i1	21.41
TR13218|c0_g1_i1	29.16
TR13277|c0_g3_i1	35.74
TR13280|c0_g1_i1	54.36
TR13314|c0_g1_i1	9.65
TR13317|c0_g1_i1	39.61
TR13339|c0_g1_i1	28.06
TR13349|c0_g1_i1	18.8
TR13351|c0_g3_i1	47.82
TR13380|c0_g1_i1	112.39
TR13443|c0_g1_i1	71.73
TR13462|c0_g1_i2	26.93
TR13486|c0_g4_i1	76.21
TR13495|c0_g1_i1	15.04
TR1350|c0_g1_i1	34.11
TR13535|c0_g1_i1	68.21
TR13551|c0_g1_i1	95.69
TR13553|c0_g2_i1	37.64
TR13723|c0_g1_i1	82.51
TR13868|c0_g1_i1	14.94
TR13916|c0_g1_i1	14.62
TR13937|c0_g1_i1	15.13
TR1396|c0_g1_i1	116.2
TR13999|c0_g1_i1	11.96
TR14023|c0_g1_i1	29.22
TR14079|c0_g1_i1	87.6
TR14114|c0_g1_i1	126.29
TR14130|c0_g1_i1	79.39
TR14146|c0_g1_i1	10.21
TR14298|c0_g1_i1	40.3
TR14437|c0_g1_i1	53.66
TR14441|c0_g1_i1	21.63
TR14450|c0_g1_i1	41.67
TR14465|c0_g1_i1	10.7
TR14490|c0_g1_i1	26.56
TR14577|c0_g1_i1	20.09
TR14599|c0_g1_i1	61.82
TR14609|c0_g1_i1	88.78
TR1463|c0_g2_i1	17.08
TR14644|c0_g1_i1	34.86
TR14694|c0_g1_i1	40.55
TR14741|c0_g1_i1	46.59
TR1477|c0_g1_i1	28.55
TR14770|c0_g1_i1	370.64
TR1484|c0_g1_i1	49.38
TR14949|c0_g1_i1	122.01
TR14972|c0_g1_i1	63.07
TR14979|c0_g1_i1	65.88
TR14979|c0_g1_i2	49.29
TR15038|c0_g1_i1	206.39
TR15067|c0_g1_i1	35.45
TR15093|c0_g1_i1	17.69
TR15132|c0_g1_i1	118.69
TR15135|c0_g1_i1	15.53
TR15154|c0_g1_i1	33.49
TR15179|c0_g1_i1	16.98
TR1520|c0_g1_i1	13.03
TR15230|c0_g1_i1	40.66
TR15242|c0_g1_i1	12.3
TR15261|c0_g1_i1	20.83
TR15271|c0_g1_i1	9.14
TR15315|c0_g1_i1	10.19
TR15317|c0_g1_i1	23.02
TR15373|c0_g1_i1	51.53
TR15413|c0_g1_i1	13.31
TR15417|c0_g2_i1	77.42
TR15497|c0_g1_i1	19.8
TR15545|c0_g1_i1	24.26
TR15594|c0_g1_i1	14.68
TR15606|c0_g1_i1	546.99
TR15642|c0_g1_i1	35.52
TR15657|c0_g1_i1	11.28
TR15815|c0_g1_i1	112.44
TR15842|c0_g1_i1	10.47
TR15843|c0_g1_i1	70.3
TR15853|c0_g1_i1	165.94
TR15895|c0_g1_i1	27.33
TR15937|c0_g1_i1	14.23
TR15957|c0_g1_i1	36.05
TR15971|c0_g1_i1	19.5
TR15978|c0_g1_i2	18.45
TR15990|c0_g1_i1	66.32
TR15995|c0_g1_i1	68.31
TR16126|c0_g1_i1	9.16
TR16136|c0_g1_i1	29.44
TR16158|c0_g1_i1	35.88
TR16162|c0_g1_i1	33.64
TR16180|c0_g1_i1	55.57
TR16191|c0_g1_i1	17.08
TR16203|c0_g1_i2	35.66
TR16221|c0_g1_i1	44.48
TR16233|c0_g1_i1	53.81
TR16235|c0_g1_i1	24.97
TR16247|c0_g1_i1	21.34
TR16250|c0_g1_i1	48.29
TR16253|c0_g1_i1	61.01
TR16272|c0_g1_i1	23.27
TR16291|c0_g1_i1	24.37
TR16347|c0_g1_i1	63.26
TR16449|c0_g1_i2	43.19
TR16480|c0_g1_i1	174.38
TR16484|c0_g1_i1	11.22
TR16551|c0_g1_i1	37.18
TR16554|c0_g1_i1	15.13
TR16561|c0_g1_i1	30.47
TR16585|c0_g1_i2	13.88
TR16587|c0_g1_i1	13
TR16591|c0_g1_i1	23.47
TR16604|c0_g1_i1	17.53
TR16648|c0_g2_i1	49.45
TR16651|c0_g1_i1	107.51
TR16660|c0_g1_i1	49.04
TR1667|c0_g1_i1	258.36
TR1667|c0_g1_i5	5.36
TR1667|c0_g1_i6	19.81
TR16675|c0_g1_i1	37.36
TR16704|c0_g1_i1	31.8
TR16704|c1_g1_i1	37.96
TR16735|c0_g1_i1	13.55
TR16745|c0_g1_i2	22.9
TR16747|c0_g1_i1	35.36
TR16763|c0_g1_i1	41.24
TR1691|c0_g1_i1	15.87
TR16966|c0_g1_i1	16.92
TR1699|c0_g1_i1	28.46
TR17041|c0_g1_i1	14.18
TR17048|c0_g1_i1	21.94
TR17067|c0_g1_i1	110.17
TR1707|c0_g2_i1	8.28
TR17075|c0_g1_i1	43.82
TR17100|c0_g1_i1	15.23
TR17121|c0_g1_i1	26.97
TR17141|c0_g1_i1	12.64
TR17156|c0_g1_i2	20.78
TR17169|c0_g1_i1	26.28
TR17228|c0_g1_i1	109.47
TR17246|c0_g1_i1	43.84
TR17259|c0_g1_i1	42.36
TR17269|c0_g2_i1	830.28
TR17271|c0_g1_i1	26.06
TR17273|c0_g1_i1	13.31
TR17280|c0_g1_i1	34.42
TR17313|c0_g1_i1	8.72
TR17341|c0_g1_i1	12.56
TR17341|c0_g1_i3	6.59
TR17345|c0_g1_i1	18.84
TR17350|c0_g2_i1	15.62
TR17368|c0_g1_i1	35.53
TR1738|c0_g1_i1	31.24
TR17381|c0_g1_i1	135.56
TR17405|c0_g1_i1	54.79
TR17426|c0_g1_i1	48.73
TR17449|c0_g1_i1	25.04
TR17449|c0_g1_i2	7.47
TR17454|c0_g1_i1	57.74
TR17454|c0_g2_i1	4.53
TR1746|c0_g2_i1	14.59
TR1746|c0_g3_i1	7.2
TR17474|c0_g1_i1	15.03
TR17487|c0_g1_i1	26.19
TR17495|c0_g1_i1	25.74
TR17550|c0_g1_i1	57.45
TR17558|c0_g1_i1	12.51
TR17581|c0_g1_i1	16.14
TR17588|c0_g1_i1	22.91
TR1759|c0_g1_i1	41.64
TR1760|c0_g1_i2	17.93
TR17602|c0_g1_i1	21.42
TR17629|c0_g1_i1	8.08
TR17644|c0_g2_i2	29.02
TR17685|c0_g1_i1	33.96
TR1772|c0_g2_i1	15.29
TR17730|c0_g1_i1	24.16
TR17739|c0_g2_i1	28.19
TR17759|c0_g1_i1	21.4
TR17767|c0_g1_i1	104.85
TR17791|c0_g1_i1	8.07
TR17801|c0_g1_i1	38.68
TR17832|c0_g1_i1	88.86
TR17862|c0_g1_i1	145.11
TR17865|c0_g1_i1	181.68
TR17866|c0_g2_i1	96.13
TR1787|c0_g1_i1	194.06
TR1788|c0_g1_i1	18.78
TR17894|c0_g1_i1	18.56
TR17900|c0_g1_i1	16.36
TR17911|c0_g1_i1	14.82
TR17935|c0_g1_i1	24.1
TR17947|c0_g1_i1	17.92
TR17955|c0_g1_i1	54.21
TR17969|c0_g1_i1	34.05
TR17992|c0_g1_i1	9.86
TR18016|c0_g1_i1	68.22
TR18016|c0_g1_i2	152.63
TR18037|c0_g1_i2	13.59
TR18046|c0_g1_i1	14.79
TR18096|c0_g1_i1	14.52
TR18104|c0_g1_i1	16.31
TR18111|c0_g1_i1	9.49
TR18118|c0_g1_i1	7.84
TR18140|c0_g1_i1	169.4
TR1816|c0_g1_i1	12.08
TR18163|c0_g1_i1	24.07
TR18175|c0_g1_i1	7.53
TR18179|c0_g1_i1	25.06
TR18189|c0_g1_i1	31.31
TR18270|c0_g1_i1	7.52
TR18273|c0_g1_i1	9.25
TR18286|c0_g1_i1	19.77
TR18288|c0_g1_i1	36.76
TR18306|c0_g1_i1	12.54
TR18322|c0_g2_i1	15.11
TR18325|c0_g1_i1	32.35
TR18351|c0_g1_i1	132.19
TR18364|c0_g1_i1	26.36
TR18366|c0_g1_i1	11.49
TR18408|c0_g1_i1	16.98
TR18414|c0_g1_i1	36.16
TR18414|c0_g3_i1	108.33
TR18417|c0_g1_i1	40.33
TR18435|c0_g1_i1	24.64
TR1849|c0_g1_i1	10.87
TR18497|c0_g1_i1	17.03
TR18522|c0_g1_i2	15.54
TR18523|c0_g1_i1	10.07
TR18527|c0_g4_i1	7.95
TR18559|c0_g1_i3	16.25
TR18579|c0_g1_i1	21.27
TR18595|c0_g1_i1	32.6
TR18608|c0_g1_i1	14.76
TR1861|c0_g1_i2	10.15
TR18620|c0_g1_i1	37.42
TR18639|c0_g1_i1	14.53
TR18677|c0_g1_i1	15.16
TR18682|c0_g1_i1	12.79
TR18687|c0_g1_i1	14.16
TR18710|c0_g1_i2	6.33
TR18723|c0_g1_i2	13.98
TR18726|c0_g1_i1	37.04
TR18764|c0_g1_i1	21.24
TR18771|c0_g1_i1	96.74
TR18784|c0_g1_i1	32.92
TR18805|c0_g1_i2	31.81
TR18807|c0_g1_i1	117.27
TR18836|c0_g1_i1	66.86
TR18839|c0_g2_i1	242.24
TR18847|c0_g1_i1	41.05
TR18848|c0_g1_i1	8.66
TR18849|c0_g1_i2	20.49
TR18888|c0_g1_i1	24.37
TR18894|c0_g1_i1	10.35
TR18896|c0_g1_i1	38.04
TR18900|c1_g1_i1	11.39
TR18914|c0_g1_i2	163.3
TR18928|c0_g1_i1	130.32
TR19006|c0_g1_i1	166.05
TR19008|c0_g1_i1	198.4
TR19026|c0_g1_i1	7.38
TR19030|c0_g1_i2	47.79
TR19036|c0_g1_i1	6.07
TR19036|c0_g2_i1	12.83
TR19040|c0_g1_i1	77.21
TR19040|c0_g1_i2	5.28
TR19040|c0_g2_i2	24.38
TR19054|c0_g1_i1	13.29
TR19059|c0_g1_i1	50.41
TR19069|c0_g1_i1	181.69
TR19108|c0_g1_i1	129.97
TR19118|c0_g1_i1	45.41
TR19122|c0_g1_i1	17.11
TR19137|c0_g1_i2	61.31
TR19140|c0_g1_i1	171.14
TR19144|c0_g1_i1	6.58
TR19149|c0_g1_i1	11.67
TR19155|c0_g1_i1	28.32
TR19175|c0_g1_i1	10.74
TR19193|c0_g1_i1	36.35
TR1922|c0_g1_i1	23.2
TR19223|c0_g1_i1	24.69
TR19229|c0_g1_i1	21.04
TR19239|c0_g1_i1	9.55
TR19242|c0_g1_i1	20.7
TR19244|c0_g1_i1	13.03
TR19254|c0_g1_i1	54.35
TR19279|c0_g1_i1	26.45
TR19288|c0_g1_i1	65.12
TR19291|c0_g1_i3	51.29
TR19302|c0_g1_i1	29.08
TR19303|c0_g1_i1	47.64
TR19360|c0_g1_i1	16.6
TR19377|c0_g1_i1	72.31
TR19383|c0_g1_i2	62.56
TR19385|c0_g1_i1	13.45
TR19389|c0_g1_i1	27.59
TR19435|c0_g1_i1	192.25
TR19438|c0_g1_i1	10.02
TR19449|c0_g1_i1	29.78
TR19470|c0_g1_i1	22.05
TR19485|c0_g1_i1	24.87
TR19486|c0_g2_i1	20.36
TR19488|c0_g1_i1	55.72
TR19498|c0_g1_i1	19.41
TR19514|c0_g1_i1	38.14
TR19514|c0_g1_i2	10.73
TR19546|c0_g2_i1	26.09
TR19553|c0_g1_i1	41.96
TR19561|c0_g1_i1	23.12
TR19573|c0_g1_i1	13.85
TR1959|c0_g1_i1	18.45
TR19591|c0_g1_i1	36.76
TR19603|c0_g2_i1	23.78
TR19613|c0_g2_i1	12.6
TR19631|c0_g2_i1	67.25
TR19637|c0_g1_i2	32.5
TR19662|c0_g1_i1	12.22
TR19685|c0_g1_i1	14.4
TR19688|c0_g2_i1	250.75
TR19716|c0_g1_i1	109.65
TR19720|c0_g1_i1	13.89
TR19730|c0_g1_i1	15.51
TR19734|c0_g1_i1	132.3
TR19748|c0_g1_i1	25.37
TR19751|c0_g2_i1	23.82
TR19773|c0_g1_i1	10.16
TR19773|c0_g1_i2	17.09
TR19835|c0_g1_i1	17.91
TR19839|c0_g1_i1	11.1
TR19861|c0_g1_i1	15.79
TR19865|c0_g1_i1	7.56
TR19875|c0_g1_i2	282.16
TR19879|c0_g1_i1	40.91
TR19890|c0_g1_i2	15.02
TR19890|c0_g1_i3	75.1
TR19890|c0_g1_i4	5.05
TR19897|c0_g1_i1	23.36
TR1990|c0_g1_i1	18.27
TR19902|c0_g1_i1	12.53
TR19903|c0_g1_i1	20.82
TR19914|c0_g1_i1	82.9
TR19914|c0_g1_i2	37.23
TR19950|c0_g2_i1	15.62
TR19961|c0_g1_i1	203.77
TR19972|c0_g1_i1	12.28
TR19981|c0_g1_i1	13.42
TR19984|c0_g1_i1	84.52
TR20014|c0_g1_i1	114.35
TR20014|c0_g1_i2	14.78
TR20021|c0_g1_i1	36.05
TR20022|c0_g1_i1	17.22
TR20027|c0_g1_i1	60.15
TR20032|c0_g1_i1	48.25
TR20054|c0_g1_i1	19.09
TR20059|c0_g2_i1	22.73
TR2006|c0_g1_i1	13.88
TR20060|c0_g2_i1	9.32
TR20066|c0_g1_i1	578.77
TR20091|c0_g1_i1	43.52
TR2012|c0_g2_i1	74.98
TR20124|c0_g2_i1	1.56
TR20125|c0_g1_i1	7.43
TR20127|c0_g1_i1	12.79
TR20137|c0_g1_i2	164.14
TR20144|c0_g1_i2	32.61
TR20145|c0_g1_i1	52.27
TR20160|c0_g1_i1	11.25
TR20169|c0_g1_i1	41.61
TR20199|c0_g1_i2	8.15
TR20200|c0_g1_i1	10.2
TR20238|c0_g1_i1	25.02
TR20255|c0_g1_i1	12.1
TR20263|c0_g1_i2	18.46
TR20267|c0_g1_i1	19.25
TR2027|c0_g1_i1	9.09
TR20276|c0_g1_i2	103.41
TR20277|c0_g1_i1	22.05
TR20285|c0_g1_i1	23.54
TR20294|c0_g1_i1	20.85
TR20317|c0_g1_i1	37.87
TR20327|c1_g1_i1	11.96
TR20328|c0_g1_i1	8.21
TR20337|c0_g1_i2	14.27
TR20346|c0_g1_i1	109.89
TR20347|c1_g1_i1	20.22
TR2035|c0_g1_i1	11.19
TR20363|c0_g1_i1	29.18
TR20363|c0_g1_i2	44.3
TR20366|c0_g2_i1	567.27
TR20368|c0_g1_i1	86.05
TR20371|c0_g1_i1	6.37
TR20386|c0_g1_i1	13.36
TR20401|c0_g2_i1	21.81
TR20410|c0_g1_i1	19.9
TR20413|c0_g2_i1	177.99
TR20436|c0_g1_i1	31.88
TR20442|c0_g1_i1	44.68
TR20450|c0_g1_i1	46.53
TR20465|c0_g1_i1	13.83
TR20467|c0_g2_i1	9.46
TR20471|c0_g1_i1	268.33
TR20472|c0_g1_i1	19.8
TR20472|c0_g1_i2	0.96
TR20480|c0_g1_i1	14.01
TR20497|c0_g1_i1	105.61
TR20504|c0_g1_i1	17.41
TR2051|c0_g1_i1	11.65
TR20531|c0_g1_i1	19.97
TR20532|c0_g1_i1	12.12
TR20532|c0_g1_i2	14.21
TR20532|c0_g2_i1	11.88
TR20537|c0_g1_i1	23.2
TR20541|c0_g1_i1	25.2
TR20558|c0_g2_i1	15.61
TR20559|c0_g1_i1	14.27
TR20560|c0_g2_i2	10.16
TR20565|c0_g1_i1	210.04
TR20566|c0_g1_i1	21.27
TR20597|c0_g1_i3	39.93
TR20597|c0_g1_i4	3.21
TR20613|c0_g1_i1	12.19
TR20645|c0_g1_i1	23.91
TR20664|c0_g1_i1	42.69
TR20669|c0_g1_i1	20.17
TR20673|c0_g1_i1	28.03
TR20687|c0_g1_i1	13.61
TR20689|c0_g1_i1	8.37
TR20710|c1_g1_i3	3.9
TR20710|c1_g1_i5	10.19
TR20714|c0_g1_i4	7.57
TR20726|c0_g1_i1	43.96
TR20732|c0_g1_i2	27.51
TR20733|c0_g1_i1	14.64
TR20734|c0_g1_i1	24.22
TR20737|c0_g1_i1	21.91
TR20740|c0_g1_i2	43.83
TR20758|c0_g1_i1	26.63
TR20767|c0_g1_i2	16.48
TR20773|c0_g1_i2	64.39
TR20774|c0_g1_i1	18.52
TR20779|c0_g1_i1	57.91
TR20784|c0_g1_i1	11.88
TR20787|c0_g1_i2	14.19
TR20789|c0_g1_i1	6.07
TR20791|c0_g1_i1	49.07
TR20792|c0_g1_i1	25.36
TR20796|c0_g1_i1	13.09
TR20796|c0_g1_i3	23.13
TR20806|c0_g1_i1	34.25
TR20820|c0_g1_i1	13.28
TR20839|c0_g1_i2	30.56
TR20882|c0_g2_i1	16.46
TR20885|c1_g1_i1	6.83
TR20887|c0_g1_i1	26.65
TR20903|c0_g1_i3	11.71
TR20911|c0_g1_i1	22.36
TR20913|c0_g1_i1	54.37
TR20918|c0_g1_i1	110.26
TR20919|c0_g1_i1	16.28
TR20941|c0_g1_i1	16.28
TR2095|c0_g1_i1	24.58
TR20986|c0_g1_i1	31.91
TR20986|c0_g1_i2	14.95
TR20989|c0_g1_i1	15.73
TR21007|c0_g1_i4	15.22
TR21008|c0_g1_i2	18.65
TR21009|c0_g1_i1	7.47
TR21011|c1_g1_i1	30.62
TR21023|c0_g1_i1	29.89
TR21031|c0_g1_i2	77.5
TR21042|c0_g1_i5	13.07
TR21046|c0_g1_i2	12.15
TR21050|c0_g1_i2	22.12
TR21055|c0_g1_i3	3.1
TR21055|c0_g1_i4	5.3
TR21060|c0_g1_i1	30.87
TR21074|c0_g1_i2	18.81
TR21081|c0_g1_i1	14.22
TR21083|c0_g1_i1	20.82
TR21101|c0_g1_i5	101.48
TR21104|c0_g1_i1	33.27
TR21116|c0_g1_i1	9.65
TR21126|c0_g2_i1	18.5
TR21129|c0_g1_i1	9.16
TR21130|c0_g1_i1	10.71
TR21130|c0_g1_i2	4.51
TR21132|c0_g1_i2	30.61
TR21140|c0_g1_i1	16.07
TR21147|c0_g2_i1	47.2
TR21148|c0_g1_i1	13.28
TR21158|c0_g1_i1	14.41
TR21169|c0_g3_i1	18.73
TR21177|c0_g1_i1	16.87
TR21178|c0_g1_i1	158.96
TR21180|c0_g2_i2	85.85
TR21190|c0_g1_i1	16.71
TR21194|c0_g1_i1	57.56
TR21195|c0_g1_i2	12.54
TR21217|c0_g1_i1	62.47
TR21223|c0_g1_i1	34.86
TR21249|c0_g1_i2	54.78
TR21261|c0_g1_i1	67.87
TR21281|c0_g1_i1	62.49
TR21282|c1_g1_i3	12.08
TR21282|c2_g1_i1	56.24
TR21288|c0_g1_i1	38.86
TR21292|c0_g1_i1	25.37
TR21294|c0_g1_i1	26.74
TR21296|c0_g1_i1	46.15
TR21299|c0_g1_i1	7.19
TR21323|c0_g1_i2	23.67
TR2133|c0_g1_i1	22.41
TR21331|c0_g1_i1	85.7
TR21342|c0_g1_i1	15.95
TR21347|c0_g1_i1	34.82
TR21376|c0_g1_i1	21.83
TR21383|c0_g2_i1	14.32
TR21385|c0_g1_i1	122.89
TR21397|c0_g1_i1	4.72
TR21406|c0_g1_i3	3.34
TR21406|c0_g1_i4	26.35
TR21410|c0_g1_i1	108.73
TR21411|c0_g1_i1	17.13
TR21413|c0_g1_i1	19.46
TR21422|c0_g1_i1	25.96
TR21433|c0_g1_i1	12.92
TR21445|c0_g1_i1	31.91
TR2145|c0_g1_i1	18.54
TR21450|c0_g1_i1	19.62
TR21454|c0_g1_i1	70.25
TR21455|c0_g1_i1	43.09
TR21456|c0_g1_i1	174.3
TR21464|c0_g1_i1	51.65
TR21468|c0_g1_i1	54.36
TR2149|c0_g1_i1	10.09
TR21490|c1_g1_i1	31.35
TR21496|c1_g1_i1	5.59
TR21496|c1_g1_i2	1.95
TR21497|c0_g1_i2	24.58
TR21501|c0_g1_i1	29.54
TR21513|c0_g1_i1	16.44
TR21517|c0_g1_i1	21.02
TR21517|c0_g2_i1	19.65
TR21522|c0_g2_i1	23.56
TR21532|c0_g1_i1	689.7
TR2157|c0_g1_i3	6.8
TR2157|c0_g3_i1	14.34
TR2158|c0_g1_i2	3.95
TR2159|c0_g1_i1	17.2
TR2160|c0_g1_i1	11.55
TR2160|c0_g1_i2	15.92
TR21606|c0_g1_i1	27.51
TR2161|c0_g8_i1	111.7
TR21614|c0_g1_i1	17.04
TR2163|c0_g1_i1	63.6
TR2163|c0_g1_i2	0
TR2163|c0_g1_i3	14.07
TR2163|c0_g3_i1	32.82
TR2163|c0_g3_i2	13.83
TR21630|c0_g1_i2	59.24
TR21633|c0_g1_i1	18.92
TR21645|c0_g1_i1	18.72
TR21648|c0_g1_i1	25.79
TR2165|c0_g1_i1	28.36
TR2165|c0_g1_i2	10.39
TR21651|c0_g1_i2	17.04
TR21658|c0_g1_i1	18.33
TR2167|c0_g1_i4	14.66
TR21671|c0_g1_i1	16.25
TR21678|c0_g1_i1	17.99
TR21679|c1_g2_i1	24.39
TR21681|c0_g1_i1	15.51
TR2169|c0_g3_i1	47.53
TR2169|c0_g4_i1	14.49
TR21693|c0_g1_i2	7.67
TR21697|c0_g1_i1	88.03
TR21699|c0_g1_i1	187.98
TR2170|c1_g3_i1	11.37
TR21701|c0_g1_i1	12.41
TR21701|c0_g2_i1	4.82
TR21702|c0_g1_i1	14.13
TR2171|c0_g1_i1	210.53
TR2171|c0_g1_i2	383.32
TR2171|c0_g2_i2	99.19
TR2171|c0_g2_i4	347.36
TR2171|c0_g2_i6	607.91
TR21714|c0_g1_i2	4.42
TR21719|c1_g1_i2	11.68
TR21723|c0_g1_i1	4.8
TR21724|c0_g1_i2	22.53
TR21737|c0_g1_i1	39.28
TR21743|c0_g1_i1	20.76
TR21746|c0_g1_i1	12.08
TR21750|c0_g1_i1	26.83
TR21751|c0_g1_i1	23.84
TR21755|c0_g1_i4	11.14
TR21756|c0_g1_i1	13.56
TR2176|c0_g1_i1	5.87
TR2176|c0_g1_i5	4.88
TR2176|c0_g1_i8	6.15
TR2176|c0_g4_i1	15.66
TR21762|c0_g1_i1	23.1
TR21765|c0_g1_i1	14.71
TR2177|c0_g1_i2	8.87
TR21776|c0_g1_i1	3.08
TR21776|c0_g1_i3	10.22
TR21776|c0_g2_i1	14
TR2178|c4_g2_i1	42.56
TR2178|c5_g1_i2	13.06
TR21781|c0_g1_i1	19.85
TR21782|c0_g1_i1	29.06
TR2179|c0_g1_i1	119.55
TR2179|c0_g1_i3	51.98
TR21794|c0_g1_i2	7.65
TR2180|c0_g1_i3	9.55
TR2180|c0_g1_i8	13.36
TR21800|c0_g1_i1	7.74
TR2181|c0_g2_i1	38.67
TR21814|c0_g1_i1	15.5
TR2182|c0_g1_i1	4.05
TR21823|c0_g1_i1	40.75
TR21844|c0_g1_i1	16.78
TR21844|c0_g1_i2	24.78
TR21846|c0_g1_i1	47.26
TR21846|c0_g2_i1	13.98
TR21846|c0_g3_i1	12.38
TR21846|c0_g4_i1	44.83
TR21857|c0_g1_i1	13.24
TR21860|c0_g1_i1	21.75
TR21870|c0_g1_i1	11.17
TR21873|c0_g1_i1	11.08
TR2188|c0_g1_i5	47.94
TR2188|c0_g1_i6	23.81
TR2188|c0_g5_i1	56.26
TR21889|c0_g1_i1	15.29
TR2189|c0_g1_i1	202.22
TR21896|c0_g1_i1	20.37
TR21902|c0_g1_i1	94.08
TR2192|c0_g2_i1	23.28
TR2192|c0_g2_i3	28.23
TR2192|c0_g2_i4	21.1
TR2192|c0_g2_i6	50.81
TR21923|c0_g2_i1	14.81
TR21923|c0_g2_i2	23.85
TR2193|c0_g1_i2	14.28
TR21937|c0_g1_i1	24.09
TR2194|c0_g1_i2	7.81
TR2194|c0_g1_i3	28.74
TR21940|c0_g1_i2	8.26
TR21946|c0_g1_i1	22.91
TR21949|c0_g1_i1	42.75
TR21949|c0_g3_i1	24.17
TR21949|c0_g3_i2	33.22
TR2195|c0_g1_i3	62.41
TR2195|c0_g1_i4	8.58
TR2195|c0_g1_i8	9.76
TR2195|c0_g1_i9	18.53
TR21956|c0_g1_i1	21.82
TR21959|c0_g1_i1	21.64
TR2196|c0_g1_i1	42.5
TR2197|c0_g1_i1	58.98
TR2197|c0_g2_i2	36.24
TR2197|c0_g2_i4	17.24
TR21986|c0_g1_i1	9.27
TR22002|c1_g1_i1	27.41
TR22002|c1_g1_i5	52.31
TR22009|c0_g1_i1	35.75
TR2201|c0_g1_i1	9.16
TR2201|c0_g3_i1	24.25
TR2201|c0_g3_i2	11.95
TR22014|c0_g1_i1	13.43
TR22023|c0_g1_i1	31.7
TR22023|c0_g1_i3	15.16
TR22025|c0_g1_i1	18.96
TR22036|c0_g2_i1	26.86
TR22051|c0_g1_i1	10.25
TR2207|c0_g1_i1	3.18
TR2207|c0_g1_i2	4.63
TR2207|c0_g1_i7	2.77
TR2208|c1_g1_i2	15.66
TR22084|c0_g1_i1	82.2
TR22084|c0_g1_i2	29.5
TR2209|c0_g3_i2	8.85
TR2209|c0_g3_i3	23.33
TR22093|c0_g1_i1	25.72
TR22095|c0_g1_i1	7.76
TR22098|c0_g1_i2	26.87
TR22110|c0_g3_i1	33.5
TR22115|c0_g1_i1	98.7
TR2212|c1_g1_i1	50.53
TR2212|c1_g1_i2	34.82
TR2212|c1_g2_i1	21.58
TR2212|c1_g2_i2	47.66
TR22122|c0_g1_i1	8.33
TR22128|c0_g1_i3	8.7
TR2213|c0_g1_i1	73.51
TR22134|c0_g1_i2	6.86
TR22136|c0_g1_i1	30.27
TR2214|c1_g1_i1	34.47
TR2214|c2_g1_i1	311.15
TR2214|c2_g1_i2	109.7
TR2214|c3_g2_i1	160.07
TR2214|c3_g4_i1	177.28
TR2214|c3_g9_i1	138.58
TR22158|c0_g1_i1	11.87
TR2216|c1_g1_i1	49.54
TR2216|c1_g2_i1	49.55
TR2216|c1_g5_i1	3.75
TR22166|c0_g1_i2	10.47
TR2217|c0_g1_i2	47.97
TR2217|c1_g1_i2	5.8
TR2217|c1_g2_i1	25.74
TR22171|c1_g4_i1	485.41
TR2218|c1_g2_i1	24.08
TR22180|c0_g1_i1	12.15
TR22194|c0_g1_i1	6.81
TR22196|c0_g1_i1	38.94
TR22205|c0_g1_i1	15.01
TR2221|c0_g1_i2	43.01
TR22215|c0_g1_i1	23.26
TR22223|c0_g1_i2	7.39
TR22225|c0_g1_i1	36.36
TR2223|c0_g1_i3	7.06
TR22245|c0_g1_i1	14.64
TR2225|c1_g11_i1	148.6
TR2225|c1_g11_i10	26.47
TR2225|c1_g11_i2	81.25
TR2225|c1_g11_i5	76.87
TR2225|c1_g11_i8	26.81
TR2225|c1_g12_i1	56.03
TR22251|c0_g1_i1	17.62
TR22259|c0_g1_i1	21.16
TR22259|c0_g1_i2	13.55
TR2226|c0_g1_i1	26.96
TR2228|c0_g2_i2	42.87
TR22282|c0_g1_i1	41.02
TR22286|c0_g1_i1	21.27
TR22292|c0_g1_i1	20.66
TR22308|c0_g1_i1	253.85
TR2231|c0_g1_i1	15.2
TR22310|c0_g1_i1	57.74
TR2232|c0_g1_i1	16.54
TR22333|c0_g1_i1	26.97
TR22337|c0_g1_i1	4
TR2236|c0_g1_i1	10.41
TR22370|c0_g1_i1	14.24
TR22379|c0_g1_i1	214.21
TR2238|c0_g1_i1	7.19
TR2238|c0_g1_i4	2.28
TR22386|c0_g1_i1	38.19
TR2239|c0_g3_i1	92.55
TR2239|c0_g3_i3	95.78
TR2239|c0_g3_i4	1.93
TR22390|c0_g1_i1	7.71
TR22408|c0_g1_i1	18.89
TR22412|c0_g1_i1	40.86
TR22419|c0_g1_i1	6.31
TR22423|c0_g1_i1	26.39
TR2243|c0_g1_i1	17.78
TR2243|c0_g1_i2	17.02
TR2243|c0_g2_i1	28.89
TR22431|c0_g1_i1	31.68
TR22432|c0_g1_i1	26.11
TR22435|c0_g1_i1	13.45
TR22438|c0_g1_i1	16.51
TR2244|c1_g1_i6	274.71
TR2244|c1_g1_i7	279.46
TR2244|c1_g1_i8	46.85
TR22440|c0_g1_i2	17.14
TR22446|c0_g2_i1	18.86
TR22447|c0_g1_i1	30.89
TR2245|c4_g1_i1	22.19
TR2246|c0_g1_i1	34.11
TR2247|c0_g1_i1	9.84
TR2248|c0_g1_i2	6.43
TR2248|c0_g1_i5	33.73
TR2248|c1_g3_i1	60.15
TR22493|c0_g1_i1	6.82
TR2250|c2_g2_i2	31.47
TR2250|c3_g1_i1	109.07
TR2250|c3_g1_i2	64.38
TR2253|c1_g2_i1	94.3
TR22531|c0_g1_i1	22.81
TR22536|c0_g1_i1	34.16
TR2254|c0_g1_i1	48.49
TR2254|c0_g1_i10	28.71
TR2255|c10_g1_i1	330.57
TR2255|c10_g3_i3	88.67
TR2255|c10_g4_i1	104.76
TR22554|c0_g1_i1	18.9
TR2256|c0_g1_i2	64.58
TR2256|c1_g2_i2	14.41
TR2256|c2_g1_i1	51.16
TR2256|c3_g1_i1	55.43
TR2256|c3_g1_i2	131.85
TR2256|c3_g1_i3	55.46
TR2256|c3_g1_i9	19.69
TR22560|c0_g1_i1	8.22
TR22564|c0_g2_i1	16.16
TR22581|c0_g1_i2	10.67
TR22583|c1_g1_i1	15.98
TR2259|c1_g1_i1	24.54
TR2259|c1_g1_i3	4.21
TR22590|c0_g1_i1	29.11
TR22599|c0_g1_i1	35.64
TR22599|c0_g2_i1	12.04
TR2260|c0_g2_i1	266.02
TR2260|c0_g3_i1	307.8
TR2260|c0_g3_i2	318.56
TR22601|c0_g1_i1	53.26
TR22608|c1_g1_i3	21.76
TR2261|c0_g1_i1	52.1
TR2261|c0_g2_i1	54.09
TR2261|c0_g2_i3	171.45
TR2261|c0_g3_i2	106.91
TR2261|c0_g4_i1	136.69
TR2261|c0_g5_i1	15.07
TR22619|c0_g1_i1	28.28
TR2262|c0_g1_i1	13.32
TR2262|c0_g7_i1	11.05
TR2263|c1_g1_i8	22.19
TR22639|c0_g1_i1	24.5
TR2264|c0_g1_i2	19.41
TR2264|c0_g1_i4	11.1
TR2264|c0_g2_i1	0
TR2265|c0_g4_i1	14.55
TR22658|c0_g1_i1	41.85
TR22658|c0_g2_i2	47.37
TR2266|c0_g1_i1	25.68
TR2266|c0_g1_i2	168.15
TR2266|c0_g1_i3	272.94
TR22661|c1_g1_i2	166.69
TR22678|c0_g1_i2	12.86
TR22687|c0_g1_i1	10.65
TR22689|c0_g1_i1	14.62
TR22689|c0_g3_i1	8.35
TR22709|c0_g1_i1	10.79
TR22716|c0_g1_i1	9.44
TR22724|c0_g1_i1	52.42
TR22729|c0_g1_i1	14.85
TR2273|c1_g1_i2	18.86
TR2273|c1_g1_i3	152.09
TR22739|c0_g1_i1	112.07
TR22739|c0_g2_i1	65.75
TR22739|c0_g3_i1	178.38
TR22739|c0_g3_i2	193.64
TR2274|c0_g1_i3	14.43
TR22746|c0_g1_i3	13.17
TR22747|c0_g1_i2	8.89
TR2277|c0_g1_i1	8.44
TR2277|c0_g1_i2	3.43
TR2277|c0_g1_i3	6.9
TR22774|c0_g1_i2	188.89
TR22780|c0_g1_i1	10.26
TR22789|c0_g1_i1	17.74
TR2279|c0_g3_i2	8.56
TR22790|c0_g1_i2	24.35
TR22792|c0_g1_i1	27.59
TR22799|c0_g1_i1	25.81
TR2280|c0_g1_i1	544.45
TR2280|c0_g4_i2	334.59
TR22803|c0_g1_i1	14.53
TR22805|c0_g1_i1	164.66
TR22817|c0_g2_i1	36.2
TR2282|c0_g1_i1	19.15
TR22821|c0_g1_i2	6.03
TR22823|c0_g1_i2	52.63
TR22829|c0_g1_i1	44.79
TR2283|c0_g1_i1	44.76
TR2283|c0_g5_i1	83.59
TR22835|c0_g1_i1	14.86
TR2284|c0_g3_i1	8.8
TR2284|c0_g5_i1	4.67
TR22846|c0_g1_i1	46.05
TR22846|c0_g1_i2	10.84
TR22855|c0_g1_i2	8.66
TR22859|c0_g1_i1	7.2
TR2286|c0_g1_i3	10.21
TR22863|c0_g1_i1	224.61
TR22865|c0_g1_i1	28.38
TR22869|c0_g1_i1	14.81
TR22878|c0_g1_i1	20.21
TR22885|c0_g1_i1	13.64
TR22885|c0_g2_i1	9.82
TR22894|c0_g1_i1	22.4
TR22894|c0_g2_i1	7.27
TR22896|c0_g1_i3	10.05
TR2290|c0_g2_i4	20.66
TR22907|c0_g1_i1	5.22
TR22910|c0_g1_i1	20.37
TR22912|c0_g1_i1	41.72
TR22919|c0_g1_i1	8.69
TR22919|c0_g1_i2	3.73
TR22923|c0_g1_i1	16.49
TR22926|c0_g1_i1	38.57
TR22928|c0_g1_i1	4.46
TR2293|c0_g1_i1	6.51
TR2293|c0_g2_i1	9.41
TR2293|c0_g2_i2	6.72
TR22937|c0_g1_i1	15.63
TR2294|c0_g3_i2	89.37
TR2294|c0_g3_i3	37.59
TR2294|c0_g3_i4	37.01
TR2294|c0_g4_i1	3.77
TR2294|c0_g4_i3	21.24
TR2294|c0_g5_i1	6.25
TR2294|c0_g7_i2	7.97
TR22942|c0_g2_i1	10.51
TR22945|c0_g1_i1	8.26
TR22950|c0_g1_i1	9.97
TR2296|c0_g3_i1	19.99
TR2296|c0_g4_i3	17.9
TR2297|c0_g1_i2	3.23
TR2297|c0_g2_i2	6.56
TR2297|c0_g3_i1	103.68
TR2297|c0_g3_i2	39.3
TR22975|c0_g1_i1	34.5
TR22979|c0_g1_i1	19.52
TR22981|c0_g1_i1	7.68
TR22982|c0_g1_i1	6.59
TR2299|c0_g1_i1	90.59
TR22993|c0_g1_i1	34.39
TR22995|c0_g1_i2	31.75
TR22995|c0_g1_i3	13.77
TR22996|c0_g1_i1	7.35
TR23003|c0_g1_i1	209.33
TR23003|c0_g1_i2	126.87
TR23004|c0_g1_i1	26.24
TR23008|c0_g1_i1	92.01
TR23010|c0_g1_i1	13
TR23026|c0_g1_i1	26.65
TR2303|c0_g1_i1	34.86
TR2303|c1_g3_i1	49.05
TR2303|c1_g3_i10	17.8
TR2303|c1_g3_i2	17.75
TR2303|c1_g3_i3	21.25
TR2303|c1_g3_i4	10.51
TR2303|c1_g3_i5	77.88
TR2303|c1_g3_i8	108.95
TR23035|c0_g1_i1	99.67
TR2304|c0_g1_i1	32.6
TR2304|c0_g1_i3	8.85
TR23041|c0_g1_i1	13.15
TR23042|c0_g2_i1	6.72
TR23044|c0_g1_i3	34.19
TR23047|c0_g2_i1	17.45
TR23048|c0_g1_i1	35.5
TR23052|c0_g2_i1	56.11
TR23059|c0_g1_i3	10.07
TR2306|c0_g3_i1	5
TR23066|c0_g1_i1	17.75
TR2307|c0_g1_i1	61.88
TR23080|c0_g1_i1	14.59
TR23080|c0_g2_i1	8.47
TR23088|c0_g1_i3	495.16
TR23088|c0_g2_i1	1174.05
TR2309|c0_g1_i3	6.27
TR23092|c0_g1_i1	5.84
TR23095|c0_g1_i1	49.19
TR23099|c0_g1_i1	15.44
TR2310|c0_g1_i3	18.18
TR23102|c0_g1_i1	16.43
TR23104|c0_g1_i1	7.32
TR23105|c1_g2_i3	37.43
TR23106|c0_g1_i1	14.34
TR23106|c1_g1_i1	25.96
TR2311|c0_g1_i1	27.15
TR2312|c0_g4_i10	0.92
TR2312|c0_g4_i5	39.89
TR23121|c0_g1_i1	54.41
TR2313|c0_g1_i1	11.3
TR2313|c0_g1_i2	12.85
TR23131|c0_g1_i1	28.04
TR23132|c0_g2_i1	45.27
TR23134|c1_g1_i1	7.81
TR23135|c0_g1_i2	12.67
TR23138|c0_g1_i1	210.57
TR2314|c0_g1_i2	5.8
TR23144|c0_g1_i4	5.64
TR23144|c0_g1_i5	0.67
TR23151|c0_g1_i1	12.39
TR23152|c0_g1_i2	24.42
TR2316|c0_g1_i1	114.92
TR2316|c0_g1_i2	55.46
TR2316|c0_g1_i4	38.38
TR23163|c0_g3_i1	10.14
TR23163|c0_g4_i1	10.95
TR2317|c1_g1_i1	885.93
TR23174|c0_g1_i1	58.49
TR23174|c0_g2_i1	8.85
TR2318|c0_g1_i10	57.08
TR2318|c0_g1_i6	33.52
TR23182|c0_g2_i2	130.97
TR23182|c0_g2_i3	117.29
TR2320|c0_g1_i1	17.99
TR2320|c0_g5_i1	38.47
TR2320|c0_g5_i2	44.83
TR23204|c0_g1_i1	41.02
TR2321|c0_g1_i1	76.5
TR2321|c1_g1_i2	46.48
TR23211|c1_g1_i1	21.01
TR23211|c1_g1_i2	18.94
TR23222|c0_g1_i1	11.04
TR2323|c0_g1_i2	1.55
TR23231|c0_g1_i1	44.75
TR2324|c0_g1_i1	16.35
TR2324|c0_g1_i2	6.83
TR23247|c0_g3_i2	163.41
TR23249|c0_g1_i2	24.7
TR23249|c0_g1_i3	55.63
TR2325|c0_g1_i2	11.29
TR23253|c0_g1_i1	34.25
TR23257|c0_g1_i1	35.21
TR23258|c0_g1_i1	20.56
TR2326|c0_g1_i2	6.08
TR2326|c0_g1_i6	4.37
TR2326|c0_g1_i8	0
TR2327|c0_g2_i1	16.69
TR2327|c0_g4_i1	39.07
TR23274|c0_g1_i2	10.15
TR23278|c0_g1_i1	8.65
TR23279|c0_g1_i1	9.23
TR2328|c0_g1_i1	5.43
TR2328|c0_g1_i4	13.04
TR23282|c0_g1_i1	21.52
TR23283|c0_g1_i1	0
TR23283|c0_g1_i2	6.02
TR23285|c0_g1_i2	12.32
TR2329|c0_g2_i1	88.97
TR2329|c0_g3_i3	64.45
TR2329|c0_g3_i6	148.29
TR23294|c0_g1_i1	26.5
TR23296|c0_g1_i1	7.47
TR23299|c0_g1_i1	5.58
TR2330|c0_g1_i2	8.7
TR23300|c0_g1_i1	45.05
TR23302|c0_g1_i1	15.25
TR23304|c0_g1_i1	8.85
TR23316|c0_g1_i1	70.1
TR23317|c0_g2_i1	55.46
TR2332|c0_g1_i3	4.69
TR23326|c0_g1_i1	41.33
TR23329|c0_g1_i1	42.26
TR2333|c0_g1_i1	29.05
TR23335|c0_g1_i1	25.74
TR23337|c0_g1_i1	0
TR23337|c0_g2_i1	104.84
TR23348|c0_g1_i2	17.46
TR2335|c0_g1_i1	264.76
TR2335|c0_g2_i1	111.48
TR2335|c0_g4_i1	80.84
TR2336|c1_g1_i6	6.46
TR23374|c0_g1_i1	14.24
TR23376|c0_g3_i1	14.74
TR23376|c0_g4_i1	16.32
TR23379|c1_g1_i1	73.58
TR2338|c0_g1_i1	33.62
TR23382|c0_g1_i1	17.56
TR23384|c0_g1_i1	20.48
TR23395|c0_g1_i1	33.29
TR2340|c0_g1_i5	8.8
TR2340|c0_g1_i8	114.41
TR23408|c0_g1_i1	4.73
TR23408|c0_g1_i2	11.38
TR23408|c0_g1_i3	3.29
TR2341|c0_g1_i1	35.03
TR23413|c0_g1_i1	29.9
TR23415|c0_g1_i2	8.94
TR23426|c0_g1_i1	33.56
TR23426|c0_g2_i1	18.49
TR2343|c0_g2_i1	69.96
TR23439|c0_g1_i1	23.21
TR23442|c0_g1_i1	26.07
TR23446|c0_g1_i1	14.99
TR23447|c1_g1_i2	147.39
TR23447|c1_g1_i3	44.86
TR23448|c0_g1_i1	9.82
TR23450|c0_g1_i2	16.35
TR23453|c0_g1_i1	10.99
TR23454|c0_g2_i1	29.76
TR23456|c0_g1_i1	10.71
TR2346|c2_g2_i1	44.65
TR2346|c2_g3_i2	141.36
TR2346|c2_g3_i3	45.58
TR2346|c2_g3_i5	63.84
TR2346|c2_g3_i6	52.72
TR2346|c2_g3_i7	42.98
TR23462|c0_g1_i1	22.19
TR23463|c0_g1_i1	8.67
TR23469|c0_g1_i1	32.94
TR23473|c0_g1_i1	46.39
TR23476|c0_g1_i1	16.11
TR2348|c0_g1_i4	52.28
TR2348|c0_g1_i6	38.25
TR23480|c0_g1_i1	13.39
TR23488|c0_g2_i1	28.42
TR23489|c0_g1_i2	7.63
TR23489|c0_g1_i3	16.75
TR2349|c0_g1_i1	6.71
TR2349|c1_g1_i2	11.3
TR2349|c1_g1_i6	7.71
TR2349|c1_g1_i9	33.09
TR23491|c0_g1_i1	50.58
TR23491|c1_g1_i1	139.39
TR2350|c0_g2_i1	154.82
TR2350|c0_g2_i4	34.24
TR23503|c0_g1_i1	41.93
TR23503|c0_g1_i2	10.53
TR23503|c0_g2_i1	39.34
TR23508|c0_g2_i1	20.75
TR2351|c0_g1_i1	4.64
TR2351|c1_g1_i1	6.36
TR23510|c0_g1_i2	15.33
TR23511|c0_g2_i1	151.86
TR23512|c0_g1_i2	29.62
TR23516|c0_g1_i1	20.01
TR23519|c1_g1_i1	33.94
TR2352|c0_g1_i2	6.82
TR23520|c0_g1_i1	10.51
TR23525|c0_g1_i1	18.08
TR23530|c0_g1_i1	12.25
TR23533|c0_g1_i15	2.55
TR23533|c0_g1_i3	3.32
TR23533|c0_g1_i4	1.14
TR23533|c0_g1_i7	0.29
TR23533|c0_g1_i9	1.53
TR23539|c1_g1_i1	13.91
TR2354|c0_g1_i2	4.47
TR23545|c0_g2_i1	21.09
TR23547|c0_g1_i1	12.07
TR23563|c0_g1_i1	8.81
TR23563|c0_g1_i3	7.61
TR23566|c0_g1_i1	51.28
TR23584|c0_g1_i1	20.74
TR2359|c0_g3_i1	8.19
TR23595|c0_g1_i1	51.49
TR23596|c0_g1_i1	9.99
TR23598|c0_g1_i1	34.64
TR2360|c0_g1_i11	8.33
TR2360|c0_g1_i8	1.37
TR23600|c0_g1_i2	18.34
TR23601|c0_g1_i1	29.74
TR23601|c0_g2_i1	27.93
TR23609|c0_g1_i2	38.63
TR23609|c0_g2_i1	20.38
TR2361|c2_g1_i1	30.17
TR2361|c2_g1_i2	74.55
TR2361|c2_g1_i7	141.34
TR23610|c0_g1_i1	11.78
TR23619|c0_g1_i1	48.21
TR2362|c0_g2_i1	5.29
TR2362|c0_g2_i3	4
TR23621|c0_g1_i1	54.65
TR23627|c0_g1_i1	8.89
TR2363|c1_g1_i4	6.39
TR23638|c0_g1_i1	92.4
TR23644|c0_g3_i1	16.87
TR23657|c0_g1_i1	21.86
TR23660|c0_g2_i1	7.84
TR23660|c0_g3_i1	9.05
TR23664|c0_g1_i1	24.1
TR2367|c0_g1_i1	14.42
TR2368|c0_g1_i1	334.51
TR23681|c0_g1_i1	48.07
TR23682|c1_g1_i2	29.9
TR23685|c0_g1_i1	22.05
TR2369|c0_g5_i1	34.8
TR23705|c0_g1_i1	14.16
TR23708|c0_g1_i1	10.68
TR23719|c0_g3_i1	59.56
TR2372|c0_g1_i8	5.39
TR23720|c0_g1_i1	14.66
TR23721|c0_g1_i1	29.97
TR23728|c0_g1_i1	118.29
TR23728|c0_g2_i1	93.04
TR2373|c0_g1_i1	18.34
TR2373|c0_g1_i2	48.07
TR23730|c0_g2_i1	30.3
TR23743|c0_g1_i1	16.68
TR23758|c0_g1_i1	11.62
TR23761|c0_g1_i2	8.01
TR23762|c0_g1_i1	24.05
TR23768|c0_g1_i1	37.79
TR23768|c0_g2_i1	1.61
TR23768|c0_g3_i1	12.25
TR23770|c0_g1_i1	40.99
TR23770|c0_g3_i1	22
TR23773|c0_g1_i1	7.57
TR23778|c0_g1_i2	117.2
TR2378|c0_g1_i5	4.67
TR23783|c0_g1_i1	80.84
TR23786|c1_g1_i1	16.65
TR23786|c1_g1_i2	25.22
TR23786|c1_g2_i1	11.91
TR23787|c1_g1_i1	36.71
TR23787|c1_g1_i2	38.88
TR23787|c1_g1_i3	102.43
TR23792|c0_g1_i1	32.38
TR2381|c0_g1_i1	9.29
TR2381|c0_g1_i2	4.51
TR23811|c0_g2_i1	12.85
TR23814|c0_g1_i3	8.72
TR2382|c0_g1_i1	147.16
TR2382|c0_g1_i2	118.55
TR23821|c0_g1_i1	16.49
TR23822|c0_g1_i1	6.98
TR23823|c0_g1_i1	432.99
TR2383|c0_g1_i1	814.92
TR2383|c0_g3_i1	659.51
TR2383|c0_g5_i1	711.95
TR2383|c0_g6_i1	1111.85
TR23832|c2_g1_i1	196.32
TR23833|c0_g1_i1	33.08
TR23833|c0_g2_i1	9.8
TR23833|c0_g2_i2	5.38
TR2384|c0_g3_i5	11.4
TR2385|c0_g1_i1	24.14
TR2385|c0_g1_i4	41.63
TR2385|c0_g2_i1	14.03
TR23853|c0_g1_i2	12.57
TR23854|c0_g3_i2	20.01
TR2386|c0_g1_i2	4.18
TR23862|c0_g1_i2	227.04
TR23862|c0_g2_i1	154.61
TR23863|c0_g1_i2	18.69
TR2387|c0_g1_i1	14.59
TR23871|c0_g2_i1	16.78
TR23872|c0_g1_i2	4.89
TR2389|c0_g1_i1	35.07
TR23898|c0_g1_i3	10.98
TR2390|c0_g1_i3	8
TR2390|c0_g1_i4	35.85
TR23904|c0_g1_i2	17.08
TR23910|c0_g1_i1	79.12
TR2392|c0_g2_i1	13.07
TR23924|c0_g1_i1	7.46
TR23928|c0_g1_i2	14.53
TR23928|c0_g1_i6	2.22
TR2393|c0_g1_i1	127.92
TR2393|c0_g1_i2	110.74
TR23931|c0_g1_i1	31.67
TR23935|c0_g1_i1	75.58
TR23938|c0_g1_i2	9.2
TR2394|c0_g2_i10	6.53
TR23940|c0_g1_i1	42.47
TR23947|c0_g1_i1	15.34
TR23947|c0_g3_i2	23.27
TR23951|c0_g1_i1	19.9
TR2396|c0_g1_i1	6.45
TR2396|c0_g1_i4	6.19
TR23965|c0_g1_i1	17.15
TR23969|c1_g1_i1	40.3
TR2397|c0_g1_i2	27.79
TR2397|c0_g1_i3	59.51
TR23971|c0_g1_i1	17.66
TR23972|c0_g1_i1	6.94
TR23973|c0_g1_i1	25.77
TR2398|c0_g1_i1	162.68
TR2398|c0_g1_i2	149.6
TR2398|c0_g1_i3	71.3
TR23983|c0_g1_i2	19.65
TR2399|c0_g1_i2	124.51
TR2399|c0_g1_i3	60.81
TR23990|c0_g1_i2	12.68
TR23996|c0_g1_i2	18.8
TR23997|c0_g1_i1	8.92
TR23998|c0_g1_i2	18.43
TR24003|c0_g1_i1	26.14
TR24004|c0_g1_i1	12.86
TR24005|c0_g1_i1	15.43
TR24008|c0_g1_i2	10.72
TR2401|c0_g1_i2	40.1
TR2401|c0_g2_i1	34.5
TR2401|c0_g3_i2	47.28
TR2401|c0_g3_i3	27.24
TR24014|c0_g1_i1	35.95
TR24016|c0_g1_i1	10.09
TR24021|c1_g1_i1	7.53
TR24033|c0_g1_i1	7.54
TR24034|c0_g1_i1	177.04
TR24035|c1_g2_i2	4.96
TR2404|c0_g1_i1	45.2
TR24046|c0_g1_i1	36.32
TR24051|c0_g1_i1	16.78
TR24054|c0_g1_i1	15.03
TR24065|c0_g1_i1	15.37
TR2407|c0_g1_i2	3.12
TR24070|c0_g1_i1	9.28
TR24075|c0_g1_i2	7.4
TR2408|c0_g1_i11	1.92
TR2408|c0_g1_i5	13.64
TR2408|c0_g1_i6	4.93
TR24086|c0_g1_i1	10.02
TR24088|c0_g1_i1	26.66
TR2409|c0_g4_i2	17
TR24093|c0_g1_i1	12.72
TR24099|c0_g1_i1	9.19
TR2410|c0_g1_i2	20.55
TR2410|c0_g1_i3	18.11
TR24115|c0_g1_i1	9.36
TR24121|c0_g1_i1	21.13
TR24124|c0_g1_i1	38.53
TR24124|c0_g1_i2	15.42
TR24127|c0_g1_i1	9.97
TR2413|c0_g1_i2	57.1
TR2413|c0_g6_i1	42.14
TR2413|c0_g7_i1	20.75
TR24130|c0_g2_i1	6.36
TR24130|c0_g2_i3	15.03
TR24132|c0_g1_i1	13.73
TR24134|c0_g1_i3	12.35
TR2414|c0_g1_i1	31.48
TR2414|c0_g1_i2	61.41
TR2414|c0_g2_i1	124
TR2414|c0_g2_i2	49.28
TR24140|c0_g1_i1	126.91
TR24143|c0_g1_i1	63.57
TR2415|c4_g1_i1	8.83
TR2415|c4_g2_i1	52.52
TR24150|c0_g1_i2	4.41
TR24155|c0_g1_i1	19.55
TR24158|c0_g1_i1	15.27
TR2416|c0_g1_i1	77.92
TR2416|c0_g2_i1	100.46
TR2416|c0_g5_i1	154.82
TR2416|c0_g5_i2	68.71
TR24161|c0_g1_i1	12.84
TR24164|c0_g1_i1	27.39
TR24165|c0_g1_i1	50.61
TR2417|c0_g1_i2	3.9
TR24176|c1_g2_i2	15.57
TR24177|c3_g1_i1	81.24
TR24180|c0_g1_i1	641.49
TR24180|c2_g1_i1	73.78
TR24180|c2_g1_i2	137.17
TR24180|c2_g2_i1	26.23
TR24188|c0_g1_i1	39.07
TR24199|c0_g1_i1	17.98
TR24202|c1_g1_i2	81.24
TR24204|c0_g1_i1	18.33
TR24205|c0_g1_i1	10.96
TR24206|c0_g1_i1	48.75
TR24207|c0_g1_i1	25.01
TR24211|c0_g2_i1	29.44
TR24211|c0_g2_i3	3.25
TR24211|c0_g2_i4	4.04
TR24211|c0_g4_i1	12.45
TR24211|c0_g5_i1	1.06
TR24214|c0_g1_i1	11.79
TR24221|c0_g1_i3	11.17
TR2424|c0_g1_i1	16.74
TR2424|c0_g1_i4	0
TR2424|c0_g1_i5	5.79
TR2425|c0_g2_i2	8.8
TR2425|c0_g2_i3	151.55
TR2425|c0_g2_i7	0
TR2425|c0_g3_i2	92.48
TR24252|c1_g1_i1	222.04
TR2426|c1_g1_i1	17.48
TR2426|c1_g1_i2	7.06
TR24262|c0_g1_i2	116.75
TR24264|c0_g1_i1	12.08
TR24269|c0_g1_i1	21.89
TR2427|c0_g1_i1	34.92
TR24270|c0_g1_i1	27.27
TR24272|c0_g1_i1	15.75
TR24278|c0_g1_i1	11.23
TR2428|c0_g1_i1	23.13
TR2428|c0_g2_i2	97.29
TR2428|c0_g3_i1	7.92
TR24286|c0_g1_i1	24.26
TR24286|c0_g2_i1	15.63
TR24288|c0_g1_i1	6.38
TR2429|c0_g2_i1	73.98
TR2429|c0_g2_i3	197.14
TR24290|c0_g1_i3	59.39
TR24292|c0_g1_i1	15.88
TR24293|c0_g1_i1	4.59
TR24293|c0_g1_i2	5.02
TR24299|c0_g2_i1	30.4
TR2430|c0_g1_i2	44.63
TR2430|c0_g1_i4	32.85
TR2430|c0_g1_i5	45.77
TR2430|c0_g1_i6	16.1
TR2430|c0_g1_i7	3.79
TR24301|c0_g1_i1	26.11
TR24308|c0_g1_i1	8.07
TR2431|c1_g1_i1	63.1
TR2431|c1_g1_i2	21.55
TR24324|c0_g1_i1	13.24
TR24325|c0_g1_i3	28.25
TR24331|c0_g1_i1	16.82
TR24331|c0_g2_i1	14.95
TR24332|c0_g1_i1	12.08
TR24334|c0_g1_i1	84.59
TR24342|c2_g1_i1	28.48
TR2435|c0_g2_i1	1446.32
TR2435|c0_g2_i2	398.59
TR24353|c0_g2_i1	131.63
TR24354|c0_g1_i2	52.27
TR24357|c0_g1_i1	27.16
TR24362|c0_g1_i1	678.34
TR24367|c1_g1_i1	12.51
TR2437|c0_g1_i1	99.3
TR24370|c0_g1_i1	13.2
TR2438|c0_g1_i1	17.28
TR24381|c0_g1_i1	33.28
TR2439|c0_g1_i1	22.43
TR2439|c0_g1_i2	6.95
TR2439|c0_g1_i3	16.57
TR24390|c0_g1_i3	25.31
TR24396|c0_g1_i1	8.62
TR24397|c0_g1_i1	11.59
TR24397|c1_g1_i2	11.66
TR24399|c0_g2_i1	122.77
TR2440|c0_g1_i1	105.69
TR2440|c0_g1_i3	57.62
TR24400|c0_g1_i2	29.07
TR24400|c1_g1_i2	26.51
TR24401|c0_g2_i1	15.27
TR2441|c0_g1_i1	18.68
TR2441|c0_g1_i3	40.3
TR24410|c0_g1_i1	25.43
TR24412|c1_g1_i1	2.56
TR24423|c0_g1_i1	14.37
TR24424|c0_g1_i1	12.83
TR24427|c0_g1_i3	12.98
TR2443|c1_g3_i5	44.31
TR2443|c1_g3_i8	33.28
TR2443|c1_g4_i1	31.21
TR24434|c0_g1_i1	14.77
TR2444|c0_g1_i2	49.35
TR2445|c0_g1_i1	6.24
TR2445|c0_g1_i2	21.96
TR2445|c0_g1_i3	29.68
TR2446|c0_g2_i2	12.44
TR24491|c0_g1_i1	17.4
TR24494|c0_g2_i1	10.27
TR24496|c0_g1_i1	28.54
TR24499|c0_g1_i2	6
TR24499|c0_g1_i3	5.07
TR24507|c0_g1_i1	22.76
TR24509|c0_g1_i1	21.26
TR24514|c0_g1_i2	25.43
TR24516|c0_g1_i2	10.08
TR24519|c0_g1_i1	17.53
TR24521|c0_g1_i1	27.6
TR24521|c0_g1_i2	43.79
TR24522|c0_g1_i1	12.8
TR24523|c0_g1_i1	10.04
TR24523|c0_g1_i2	77.17
TR24525|c0_g1_i1	36.77
TR24532|c0_g1_i1	10.27
TR24537|c0_g1_i1	4.88
TR24537|c0_g1_i2	14.85
TR24538|c0_g1_i1	23.18
TR24538|c0_g1_i2	15.26
TR2454|c1_g1_i1	9.67
TR2454|c1_g1_i3	22.26
TR2454|c1_g1_i6	9.47
TR24541|c0_g3_i1	10.2
TR24545|c0_g1_i1	175.44
TR2455|c0_g1_i1	8.62
TR24551|c0_g1_i1	6.71
TR24551|c1_g1_i3	13
TR24552|c1_g1_i5	5.44
TR24552|c1_g2_i1	6.65
TR24555|c0_g1_i1	10.83
TR24559|c1_g1_i1	12.67
TR24563|c0_g1_i2	6.92
TR24566|c0_g1_i2	11.35
TR2458|c0_g1_i1	9.93
TR24580|c0_g1_i1	14.17
TR24582|c0_g1_i1	49.17
TR24587|c0_g1_i1	7.57
TR24588|c0_g1_i1	38.04
TR24589|c0_g1_i1	11.51
TR2459|c0_g1_i1	10.38
TR2459|c0_g1_i2	11.64
TR24593|c0_g1_i8	76.69
TR24601|c0_g2_i1	75.37
TR24609|c0_g1_i1	12.28
TR2462|c0_g1_i3	14.24
TR2462|c0_g1_i6	45.91
TR2462|c0_g1_i7	4.45
TR2462|c0_g3_i1	33.61
TR2462|c0_g3_i2	25.88
TR24620|c0_g1_i1	27.89
TR24620|c0_g1_i3	40.32
TR24627|c1_g1_i1	26.43
TR24627|c1_g1_i2	21.48
TR24627|c1_g1_i5	7.84
TR2463|c0_g1_i1	28.05
TR24631|c0_g1_i1	41.2
TR24638|c0_g1_i1	7.8
TR2464|c0_g1_i3	3.24
TR24647|c0_g1_i1	17.19
TR24648|c0_g1_i1	42.23
TR24649|c0_g1_i1	8.63
TR2465|c0_g1_i1	84.24
TR2465|c0_g1_i2	6.66
TR2465|c0_g1_i3	27.07
TR2465|c0_g1_i4	16.43
TR2465|c0_g1_i7	15.79
TR24651|c0_g1_i1	25.25
TR24662|c0_g1_i1	21.89
TR24668|c0_g1_i1	15.43
TR24671|c0_g3_i2	4.78
TR24674|c0_g1_i1	5.63
TR2468|c1_g3_i1	10.24
TR2468|c1_g3_i2	5.13
TR24691|c1_g1_i1	17.13
TR24694|c0_g2_i1	25.49
TR2470|c1_g1_i4	4.59
TR2470|c1_g1_i8	10.28
TR24701|c0_g1_i1	36.53
TR24701|c0_g2_i1	31.09
TR24701|c0_g2_i2	19.21
TR24708|c0_g2_i1	7.92
TR2471|c0_g1_i2	169.61
TR2471|c0_g1_i4	75
TR24710|c0_g1_i1	18.81
TR24712|c0_g1_i1	7.84
TR24716|c0_g1_i1	1.55
TR24716|c0_g1_i2	13.14
TR24716|c0_g1_i3	4.65
TR24719|c0_g1_i1	54.16
TR24719|c1_g1_i1	33.74
TR24719|c1_g3_i1	18.96
TR24722|c0_g1_i1	8.29
TR24723|c0_g1_i1	30.82
TR2473|c0_g1_i2	6.44
TR2473|c0_g1_i3	7.78
TR24732|c0_g1_i1	5.59
TR24734|c0_g1_i1	30.08
TR24734|c0_g2_i1	24.11
TR24737|c0_g1_i1	18.2
TR24743|c0_g1_i1	18.08
TR24743|c0_g2_i1	137.05
TR2475|c0_g2_i1	64.28
TR2475|c0_g3_i2	47.17
TR24755|c0_g1_i2	29.08
TR24759|c0_g1_i1	12.58
TR24769|c0_g1_i3	12.69
TR24769|c0_g1_i4	0
TR2477|c0_g2_i1	15.56
TR2477|c0_g2_i3	23.98
TR24786|c0_g1_i1	6.57
TR2479|c0_g1_i1	11.29
TR2479|c0_g1_i3	11.74
TR24790|c0_g2_i1	12.37
TR24792|c0_g1_i2	345.36
TR24792|c0_g1_i3	42.88
TR24792|c0_g2_i1	113.55
TR24793|c0_g1_i1	8.7
TR24795|c0_g1_i2	17.06
TR24795|c0_g1_i3	101.39
TR24798|c0_g1_i3	262.97
TR24798|c0_g2_i1	313.43
TR24798|c0_g2_i3	370.15
TR24802|c0_g1_i3	13.69
TR24806|c0_g4_i2	17.25
TR24806|c0_g5_i2	4.08
TR24806|c0_g6_i1	13.54
TR24808|c0_g1_i1	15
TR24809|c0_g1_i1	22.34
TR24813|c0_g1_i3	14.86
TR24814|c1_g1_i4	23.5
TR24814|c1_g1_i5	61.28
TR24815|c0_g1_i1	36.46
TR24831|c0_g1_i1	11.56
TR24832|c0_g1_i1	20.24
TR24837|c0_g1_i1	9.08
TR24848|c0_g1_i3	24.86
TR2485|c3_g1_i2	97.61
TR24852|c0_g1_i2	19.5
TR24857|c0_g1_i1	69.33
TR2486|c0_g1_i1	39.42
TR2486|c0_g1_i2	36.06
TR2486|c0_g2_i3	63.05
TR2486|c0_g2_i4	37.71
TR2486|c0_g3_i1	31.15
TR24870|c0_g2_i1	15.46
TR24871|c0_g1_i1	30.3
TR24887|c0_g1_i1	10.42
TR24889|c0_g1_i2	6.2
TR24889|c0_g1_i3	16.23
TR24901|c0_g1_i1	248.53
TR24902|c0_g1_i1	55.11
TR24905|c0_g1_i1	28.61
TR2491|c0_g1_i5	23.65
TR24911|c0_g1_i4	15.14
TR2492|c0_g2_i2	17.53
TR24921|c0_g1_i1	20.83
TR24924|c1_g2_i1	16.55
TR24926|c0_g1_i1	11.01
TR24947|c0_g1_i1	56.06
TR24949|c0_g1_i1	15.27
TR24949|c0_g1_i2	21.86
TR24951|c0_g1_i2	3.61
TR24956|c0_g1_i1	11.91
TR24961|c0_g1_i1	14.81
TR24962|c0_g1_i1	55.29
TR24962|c0_g2_i1	48.4
TR24964|c0_g1_i2	9.55
TR24966|c0_g1_i1	16.1
TR24968|c1_g1_i1	117.5
TR24968|c1_g2_i2	55.6
TR24969|c0_g1_i1	18.58
TR2497|c0_g3_i1	1591.55
TR2497|c0_g3_i3	280.9
TR2497|c0_g3_i5	345.16
TR2497|c0_g3_i6	279.13
TR2497|c0_g4_i1	407.83
TR24979|c0_g1_i1	35.68
TR2498|c0_g1_i1	16.66
TR2498|c0_g2_i1	27.34
TR2498|c0_g2_i2	7.37
TR24980|c0_g1_i1	12.98
TR24981|c0_g1_i2	85.59
TR24982|c0_g1_i1	18.69
TR24987|c0_g1_i1	5.78
TR24988|c0_g1_i5	7.37
TR24988|c0_g1_i6	15.68
TR24989|c0_g1_i1	16.13
TR2499|c0_g1_i3	45.49
TR24994|c0_g1_i1	6.72
TR2500|c0_g1_i4	8.75
TR25002|c0_g2_i3	31.86
TR25003|c0_g1_i1	20.45
TR25017|c0_g1_i1	96.33
TR25017|c0_g1_i3	43.36
TR25018|c0_g1_i1	8.28
TR2502|c0_g1_i1	49.16
TR25020|c0_g1_i1	17.01
TR25021|c0_g1_i1	20
TR25024|c0_g1_i3	151.99
TR25024|c0_g1_i4	71.06
TR25026|c0_g2_i1	23.95
TR25031|c0_g1_i1	19.25
TR25033|c0_g1_i2	29.55
TR25034|c0_g1_i1	10.31
TR25034|c0_g1_i2	25.86
TR25039|c0_g1_i3	127.67
TR2504|c0_g1_i1	27.51
TR25043|c0_g1_i1	23.99
TR25043|c1_g1_i1	14.96
TR25050|c0_g1_i1	10.34
TR25054|c0_g2_i1	9.59
TR25056|c0_g1_i1	69.57
TR2506|c0_g2_i1	28.62
TR25060|c0_g1_i1	23.76
TR25061|c0_g1_i1	13.45
TR25065|c0_g2_i1	14.93
TR25068|c0_g1_i1	11.52
TR25068|c1_g1_i2	26.1
TR2507|c0_g4_i1	10.32
TR25083|c0_g1_i3	16.64
TR25088|c0_g1_i1	23.36
TR25092|c0_g1_i1	145.78
TR25092|c0_g2_i1	11.28
TR25093|c1_g3_i1	228.1
TR25098|c0_g1_i1	7.11
TR2510|c0_g2_i4	31.52
TR2510|c0_g3_i1	41.49
TR25102|c1_g1_i1	9.39
TR25109|c0_g1_i1	13.2
TR25109|c0_g3_i1	11.64
TR25110|c1_g1_i1	27.76
TR25115|c0_g1_i2	26.15
TR25115|c0_g1_i4	16.78
TR2512|c1_g1_i1	8.93
TR25121|c0_g1_i1	63.31
TR25123|c0_g1_i1	10.3
TR25128|c0_g2_i3	13.77
TR25128|c0_g2_i4	18.04
TR2513|c1_g1_i1	30.66
TR2513|c1_g2_i1	20.83
TR25134|c0_g1_i1	21.49
TR2514|c1_g10_i1	14.64
TR2514|c1_g10_i4	12.08
TR2514|c1_g10_i5	7.8
TR2514|c1_g10_i6	22.26
TR2514|c1_g4_i1	29.3
TR2514|c1_g4_i2	20.08
TR2514|c1_g4_i3	3.23
TR2514|c1_g5_i1	83.63
TR2514|c1_g9_i1	6.83
TR2514|c1_g9_i2	13.56
TR2514|c1_g9_i3	39.78
TR25142|c0_g1_i1	31.09
TR25142|c0_g1_i4	30.47
TR25153|c0_g1_i1	18.55
TR25156|c0_g1_i1	131.23
TR2516|c0_g1_i3	22.39
TR25160|c0_g1_i4	13.47
TR25163|c0_g1_i1	49.26
TR2519|c0_g1_i1	22.82
TR25191|c0_g1_i1	17.63
TR25193|c0_g1_i1	12.89
TR25193|c0_g1_i3	11.54
TR25197|c0_g1_i1	37.67
TR25198|c0_g1_i1	38.53
TR25200|c0_g2_i1	18.53
TR25205|c0_g1_i1	25.93
TR25208|c0_g1_i2	14.84
TR2521|c0_g10_i2	27.51
TR2521|c0_g2_i1	58.83
TR2521|c0_g3_i2	78.2
TR2521|c0_g3_i3	112.83
TR2521|c0_g3_i5	82.2
TR2521|c0_g4_i2	21.5
TR25211|c0_g1_i1	22.56
TR25211|c0_g1_i2	30.95
TR25213|c0_g1_i1	15.99
TR25214|c0_g1_i4	4.8
TR25216|c0_g1_i1	56.99
TR25216|c0_g2_i2	78.03
TR25218|c0_g1_i2	22.95
TR25222|c0_g1_i1	15.68
TR2523|c0_g1_i2	56.2
TR2523|c0_g1_i8	63.56
TR2523|c0_g3_i2	111.41
TR25232|c0_g1_i1	33.11
TR25236|c0_g1_i2	38.91
TR25240|c0_g1_i1	14.79
TR25247|c0_g1_i2	5.81
TR25249|c0_g1_i1	185.43
TR25249|c0_g6_i1	552.08
TR2525|c0_g1_i1	5.18
TR2526|c0_g2_i3	24.95
TR25263|c0_g1_i4	180.38
TR25268|c0_g1_i1	37.53
TR25269|c0_g1_i1	12.35
TR25270|c0_g1_i1	10.11
TR25272|c0_g1_i1	187.95
TR25272|c0_g3_i1	21.54
TR25279|c0_g1_i1	24.27
TR2528|c3_g1_i3	5.58
TR25281|c0_g1_i1	9.53
TR25285|c0_g1_i1	17.94
TR25291|c0_g1_i1	12.59
TR25292|c0_g1_i4	10
TR25294|c0_g1_i1	41.57
TR25295|c0_g2_i1	16.49
TR2530|c0_g1_i1	17.76
TR2530|c1_g4_i1	11.71
TR2530|c1_g4_i2	4.27
TR2530|c1_g4_i3	15.02
TR25304|c0_g1_i1	23.81
TR25304|c1_g1_i1	43.8
TR25306|c1_g1_i1	253.58
TR25306|c1_g1_i2	107.79
TR25310|c0_g1_i1	10.58
TR25311|c0_g1_i2	20
TR25313|c0_g1_i1	217.45
TR2532|c0_g4_i1	24.8
TR2532|c0_g4_i2	21.27
TR25320|c0_g1_i1	13.99
TR25321|c0_g1_i2	34.53
TR25322|c0_g1_i1	31.66
TR25323|c0_g1_i1	29.14
TR25324|c0_g1_i1	47.99
TR25328|c0_g1_i2	38.22
TR25329|c0_g1_i2	12.95
TR25329|c0_g1_i3	11.28
TR25334|c0_g1_i3	36.09
TR25338|c0_g1_i1	4.39
TR2534|c0_g3_i1	9.49
TR2534|c0_g3_i2	6.08
TR2534|c0_g4_i1	16.8
TR2534|c0_g4_i3	9.11
TR25356|c0_g2_i3	17.26
TR25357|c0_g1_i3	10.73
TR25358|c0_g1_i5	9.96
TR2536|c0_g1_i2	14.35
TR25364|c0_g1_i1	14.49
TR25369|c0_g1_i1	13.74
TR2537|c1_g1_i1	34.76
TR25373|c1_g2_i1	22.33
TR25373|c1_g2_i3	14.6
TR25374|c0_g1_i2	22.68
TR25377|c0_g1_i1	8.48
TR25379|c0_g2_i1	14.03
TR25381|c0_g1_i2	16.42
TR25383|c0_g1_i3	20.12
TR25383|c0_g1_i4	46.85
TR25384|c0_g1_i2	16.97
TR2540|c1_g3_i1	30.89
TR2540|c2_g1_i1	14.63
TR2541|c0_g2_i2	11.88
TR2542|c1_g3_i2	70.19
TR2543|c1_g1_i11	1.73
TR2543|c1_g1_i12	4.6
TR2543|c1_g1_i14	12.64
TR2543|c1_g1_i3	0
TR2543|c1_g1_i4	1.73
TR2544|c0_g1_i10	11.67
TR2544|c0_g1_i2	19.29
TR2544|c0_g1_i6	15.43
TR2544|c0_g5_i1	11.85
TR2545|c0_g1_i1	37.42
TR2545|c0_g2_i1	62.73
TR2545|c0_g2_i2	125.62
TR2545|c0_g2_i4	38.06
TR2545|c1_g1_i1	86.87
TR2545|c1_g2_i1	90.38
TR2545|c1_g4_i1	50.26
TR2545|c1_g4_i2	58.68
TR2546|c0_g2_i1	6.24
TR2546|c0_g3_i1	7.9
TR2546|c0_g3_i2	4.44
TR2547|c0_g1_i1	335.09
TR2548|c0_g2_i1	15.21
TR2548|c0_g3_i2	39.2
TR2548|c0_g4_i1	55.8
TR25484|c0_g1_i2	47.47
TR25489|c0_g1_i1	12.73
TR2549|c0_g1_i1	142.03
TR2549|c0_g2_i1	103.93
TR25502|c0_g3_i1	62.44
TR25502|c0_g3_i2	244.65
TR25506|c2_g1_i1	50.75
TR25506|c2_g3_i1	94.28
TR2551|c0_g1_i4	36.56
TR25510|c1_g1_i2	6.77
TR25512|c0_g1_i2	15.54
TR25514|c0_g1_i1	52.81
TR25514|c0_g1_i2	61.18
TR25514|c0_g2_i1	57.49
TR25517|c0_g1_i3	26.38
TR25519|c0_g2_i2	5.8
TR25520|c0_g1_i2	6.59
TR25521|c0_g1_i1	217.61
TR25522|c0_g1_i1	11.83
TR25525|c1_g2_i1	72.88
TR25531|c0_g1_i2	13.82
TR25533|c0_g1_i1	17.14
TR25536|c0_g1_i1	21.82
TR25537|c0_g1_i1	10.01
TR2554|c0_g1_i3	5.41
TR25544|c1_g1_i1	24.01
TR25545|c0_g1_i2	12.88
TR25551|c0_g1_i1	14.95
TR25553|c0_g1_i1	9.4
TR25554|c0_g1_i1	35.58
TR25557|c0_g1_i1	9.25
TR25557|c0_g1_i2	10.73
TR25559|c0_g1_i1	28.02
TR2556|c1_g1_i1	8.54
TR2556|c1_g2_i1	19.91
TR25564|c0_g1_i1	7.16
TR25568|c0_g1_i1	17.14
TR25569|c0_g3_i1	34.93
TR25571|c0_g1_i1	6.46
TR25573|c1_g1_i2	33.96
TR25573|c1_g1_i4	58.69
TR25575|c0_g1_i1	249.11
TR25577|c0_g1_i1	12.35
TR25578|c0_g2_i1	730.65
TR25586|c0_g1_i1	68.77
TR25586|c1_g1_i1	19.07
TR25589|c0_g1_i1	265.42
TR2559|c1_g1_i2	89.44
TR2559|c2_g1_i1	30.72
TR2559|c2_g2_i1	9.4
TR2559|c2_g6_i1	72.4
TR25597|c0_g1_i2	11.96
TR25598|c0_g2_i1	17.8
TR2560|c1_g1_i1	6.47
TR25604|c0_g1_i1	24.82
TR25605|c0_g1_i1	19.97
TR25605|c0_g1_i2	21.15
TR2561|c0_g1_i2	8.42
TR2561|c0_g1_i3	7.18
TR25613|c0_g1_i1	6.54
TR25614|c0_g1_i1	13.3
TR25616|c0_g1_i2	21.46
TR25617|c0_g1_i1	50.63
TR25617|c0_g2_i1	23.95
TR25629|c0_g2_i1	16.01
TR25629|c0_g2_i2	10.24
TR2563|c0_g1_i1	38.4
TR2563|c0_g2_i1	46.03
TR2563|c0_g4_i1	18.81
TR2563|c0_g5_i1	119.87
TR2563|c0_g6_i1	41.63
TR2563|c0_g7_i2	68.53
TR25633|c0_g1_i1	62.93
TR25636|c0_g1_i10	6.39
TR25636|c0_g1_i4	18.1
TR2564|c0_g1_i1	44.85
TR2564|c0_g1_i4	3.08
TR2564|c0_g1_i5	42.24
TR25647|c1_g1_i1	48.88
TR25647|c1_g1_i2	1.04
TR2565|c0_g1_i1	27.54
TR2565|c0_g2_i1	10.88
TR25658|c0_g1_i1	14.11
TR25658|c0_g1_i2	30.15
TR25658|c0_g2_i1	13.05
TR25659|c0_g1_i1	187.76
TR25659|c0_g5_i1	104.78
TR2566|c0_g1_i3	15.43
TR25662|c0_g1_i1	6.27
TR25670|c0_g1_i1	140.36
TR25672|c1_g3_i1	15.45
TR25676|c0_g2_i1	18.9
TR2568|c0_g1_i1	42.43
TR25681|c0_g1_i2	38.02
TR25692|c0_g1_i1	29.14
TR25693|c0_g1_i1	12.32
TR25693|c0_g2_i1	33.37
TR25693|c0_g2_i2	20.54
TR25696|c0_g1_i2	7.68
TR2570|c0_g1_i14	2.43
TR25701|c4_g3_i1	20.83
TR25702|c0_g1_i1	25.96
TR25704|c0_g1_i1	194.17
TR2571|c0_g1_i3	41.46
TR2571|c0_g1_i5	88.16
TR25715|c0_g1_i1	3.49
TR25715|c0_g1_i2	5.23
TR2572|c1_g2_i4	2.9
TR2572|c1_g2_i5	5.71
TR2572|c1_g3_i2	14.15
TR25722|c1_g1_i3	7.46
TR25723|c0_g1_i1	26.19
TR25726|c0_g1_i1	9.78
TR25730|c0_g1_i2	8.1
TR25732|c0_g1_i1	4.91
TR25736|c0_g1_i1	19.77
TR25736|c1_g1_i1	13.73
TR25741|c0_g1_i3	17.05
TR25746|c0_g1_i1	73.23
TR25746|c0_g1_i3	19.06
TR25747|c0_g3_i2	26.45
TR2575|c0_g3_i1	47.71
TR2575|c0_g3_i2	27.71
TR2575|c0_g6_i1	39.24
TR25753|c0_g2_i1	7.83
TR25756|c0_g1_i1	8.22
TR25762|c0_g1_i2	6.44
TR25766|c0_g1_i1	29.41
TR2577|c0_g2_i1	138.59
TR2577|c0_g2_i3	41.22
TR25779|c0_g1_i1	4.28
TR25779|c0_g1_i2	5.37
TR25782|c0_g1_i2	18.22
TR25782|c0_g1_i3	18.16
TR25787|c1_g1_i1	11.09
TR25789|c0_g1_i1	19.33
TR25790|c0_g1_i1	24.32
TR25791|c0_g1_i3	7.77
[truncated: 74,918 more rows]

## Sheet: AMPHID2
AMPHID2	FPKM
TR1002|c0_g1_i1	20.98
TR10112|c0_g1_i1	19.43
TR10224|c0_g1_i1	9.28
TR10233|c0_g1_i1	54.43
TR10273|c0_g1_i1	14.6
TR1033|c0_g1_i1	40.14
TR10332|c0_g1_i1	20.74
TR10370|c0_g2_i1	23.14
TR1051|c0_g1_i1	34.66
TR10582|c0_g1_i1	25.56
TR10620|c1_g1_i1	43.67
TR1064|c0_g1_i1	12.64
TR1073|c0_g1_i1	22.41
TR10809|c0_g1_i1	58.85
TR10833|c0_g1_i1	32.52
TR10841|c0_g1_i1	12.06
TR11017|c0_g1_i1	28.73
TR1105|c0_g1_i1	79.53
TR1107|c0_g1_i1	33.59
TR11088|c0_g1_i1	15.3
TR11094|c0_g1_i1	21.77
TR11161|c0_g1_i1	13.46
TR11233|c0_g1_i1	57.83
TR11284|c0_g1_i1	65.21
TR11454|c0_g1_i1	30.43
TR11608|c0_g1_i1	11.01
TR1170|c0_g1_i1	73
TR12140|c0_g1_i1	19.66
TR1215|c0_g1_i1	31.93
TR12208|c0_g1_i1	56.91
TR12213|c0_g2_i1	20.16
TR1225|c0_g1_i1	28.98
TR12295|c0_g1_i1	41.77
TR12459|c0_g1_i1	13.27
TR12468|c0_g1_i1	24.53
TR12479|c0_g1_i1	11.61
TR1251|c0_g1_i1	30.2
TR12667|c0_g1_i1	29.4
TR12669|c0_g1_i1	26.4
TR12715|c0_g1_i1	24.63
TR1281|c0_g1_i1	19.01
TR12856|c0_g1_i1	202.31
TR12868|c0_g1_i1	40.01
TR12900|c0_g1_i1	121.74
TR12958|c0_g1_i1	18.06
TR12988|c0_g1_i1	28.67
TR1304|c0_g1_i1	60.76
TR1306|c0_g1_i1	22.17
TR13218|c0_g1_i1	12.02
TR13277|c0_g3_i1	17
TR13280|c0_g1_i1	115.95
TR13314|c0_g1_i1	15.73
TR13317|c0_g1_i1	37
TR13339|c0_g1_i1	29.15
TR13349|c0_g1_i1	27.26
TR13351|c0_g3_i1	61.18
TR13380|c0_g1_i1	101.16
TR13443|c0_g1_i1	78.72
TR13462|c0_g1_i2	9.14
TR13486|c0_g4_i1	88.39
TR13495|c0_g1_i1	21.59
TR1350|c0_g1_i1	35.01
TR13535|c0_g1_i1	65.75
TR13551|c0_g1_i1	111.63
TR13553|c0_g2_i1	40.42
TR13723|c0_g1_i1	65.19
TR13868|c0_g1_i1	28.01
TR13916|c0_g1_i1	16.34
TR13937|c0_g1_i1	16.26
TR1396|c0_g1_i1	101.17
TR13999|c0_g1_i1	15.94
TR14023|c0_g1_i1	17.26
TR14079|c0_g1_i1	77.83
TR14114|c0_g1_i1	105.23
TR14130|c0_g1_i1	61.15
TR14146|c0_g1_i1	19.13
TR14298|c0_g1_i1	49.48
TR14437|c0_g1_i1	48.02
TR14441|c0_g1_i1	34.55
TR14450|c0_g1_i1	22.73
TR14465|c0_g1_i1	15.53
TR14490|c0_g1_i1	18.58
TR14577|c0_g1_i1	25.13
TR14599|c0_g1_i1	57.97
TR14609|c0_g1_i1	76.93
TR1463|c0_g2_i1	32.84
TR14644|c0_g1_i1	35.15
TR14694|c0_g1_i1	46.52
TR14741|c0_g1_i1	19.17
TR1477|c0_g1_i1	22.17
TR14770|c0_g1_i1	433.04
TR1484|c0_g1_i1	39.59
TR14949|c0_g1_i1	100.11
TR14972|c0_g1_i1	85.2
TR14979|c0_g1_i1	75.9
TR14979|c0_g1_i2	76.64
TR15038|c0_g1_i1	285.06
TR15067|c0_g1_i1	39.37
TR15093|c0_g1_i1	24.07
TR15132|c0_g1_i1	105.32
TR15135|c0_g1_i1	17.04
TR15154|c0_g1_i1	32.74
TR15179|c0_g1_i1	20.6
TR1520|c0_g1_i1	9.82
TR15230|c0_g1_i1	39.12
TR15242|c0_g1_i1	8.94
TR15261|c0_g1_i1	22.03
TR15271|c0_g1_i1	7.95
TR15315|c0_g1_i1	8.43
TR15317|c0_g1_i1	17.11
TR15373|c0_g1_i1	45.7
TR15413|c0_g1_i1	20.92
TR15417|c0_g2_i1	56.7
TR15497|c0_g1_i1	19.23
TR15545|c0_g1_i1	16.63
TR15594|c0_g1_i1	11.05
TR15606|c0_g1_i1	399.76
TR15642|c0_g1_i1	25
TR15657|c0_g1_i1	9.91
TR15815|c0_g1_i1	118.42
TR15842|c0_g1_i1	12.34
TR15843|c0_g1_i1	59.93
TR15853|c0_g1_i1	140.89
TR15895|c0_g1_i1	21.85
TR15937|c0_g1_i1	19.56
TR15957|c0_g1_i1	36.85
TR15971|c0_g1_i1	11.98
TR15978|c0_g1_i2	14.9
TR15990|c0_g1_i1	80.36
TR15995|c0_g1_i1	69.92
TR16126|c0_g1_i1	19.1
TR16136|c0_g1_i1	16.34
TR16158|c0_g1_i1	26.01
TR16162|c0_g1_i1	18.42
TR16180|c0_g1_i1	86
TR16191|c0_g1_i1	21.9
TR16203|c0_g1_i2	52.17
TR16221|c0_g1_i1	49.69
TR16233|c0_g1_i1	48.77
TR16235|c0_g1_i1	19.31
TR16247|c0_g1_i1	14.26
TR16250|c0_g1_i1	74.15
TR16253|c0_g1_i1	47.12
TR16272|c0_g1_i1	24.28
TR16291|c0_g1_i1	21.88
TR16347|c0_g1_i1	52.71
TR16449|c0_g1_i2	44.57
TR16480|c0_g1_i1	197.73
TR16484|c0_g1_i1	14.55
TR16551|c0_g1_i1	12.47
TR16554|c0_g1_i1	13.01
TR16561|c0_g1_i1	28.84
TR16585|c0_g1_i2	24.46
TR16587|c0_g1_i1	15.49
TR16591|c0_g1_i1	32.73
TR16604|c0_g1_i1	27.84
TR16648|c0_g2_i1	50.39
TR16651|c0_g1_i1	129.12
TR16660|c0_g1_i1	30.23
TR1667|c0_g1_i1	281.22
TR1667|c0_g1_i5	4.41
TR1667|c0_g1_i6	11.22
TR16675|c0_g1_i1	40.33
TR16704|c0_g1_i1	24.26
TR16704|c1_g1_i1	38.84
TR16735|c0_g1_i1	9.81
TR16745|c0_g1_i2	17.55
TR16747|c0_g1_i1	24.72
TR16763|c0_g1_i1	40.17
TR1691|c0_g1_i1	8.22
TR16966|c0_g1_i1	13.22
TR1699|c0_g1_i1	13.69
TR17041|c0_g1_i1	27.39
TR17048|c0_g1_i1	15.18
TR17067|c0_g1_i1	94.95
TR1707|c0_g2_i1	11.77
TR17075|c0_g1_i1	40.84
TR17100|c0_g1_i1	14.76
TR17121|c0_g1_i1	27.24
TR17141|c0_g1_i1	14.91
TR17156|c0_g1_i2	26.31
TR17169|c0_g1_i1	10.52
TR17228|c0_g1_i1	128.48
TR17246|c0_g1_i1	19.92
TR17259|c0_g1_i1	26.17
TR17269|c0_g2_i1	680.37
TR17271|c0_g1_i1	22.27
TR17273|c0_g1_i1	31.95
TR17280|c0_g1_i1	20.98
TR17313|c0_g1_i1	19.75
TR17341|c0_g1_i1	13.46
TR17341|c0_g1_i3	14.34
TR17345|c0_g1_i1	15.9
TR17350|c0_g2_i1	21.79
TR17368|c0_g1_i1	50.26
TR1738|c0_g1_i1	18.42
TR17381|c0_g1_i1	151.99
TR17405|c0_g1_i1	39.62
TR17426|c0_g1_i1	67.69
TR17449|c0_g1_i1	19.18
TR17449|c0_g1_i2	19.45
TR17454|c0_g1_i1	68.81
TR17454|c0_g2_i1	13.94
TR1746|c0_g2_i1	8.65
TR1746|c0_g3_i1	11.6
TR17474|c0_g1_i1	9.82
TR17487|c0_g1_i1	23.77
TR17495|c0_g1_i1	20.05
TR17550|c0_g1_i1	63.39
TR17558|c0_g1_i1	16.2
TR17581|c0_g1_i1	7.98
TR17588|c0_g1_i1	46.07
TR1759|c0_g1_i1	23.86
TR1760|c0_g1_i2	11.59
TR17602|c0_g1_i1	24.41
TR17629|c0_g1_i1	12.73
TR17644|c0_g2_i2	19.27
TR17685|c0_g1_i1	26.06
TR1772|c0_g2_i1	24.63
TR17730|c0_g1_i1	44.19
TR17739|c0_g2_i1	37.85
TR17759|c0_g1_i1	15.07
TR17767|c0_g1_i1	112.11
TR17791|c0_g1_i1	11.26
TR17801|c0_g1_i1	35.2
TR17832|c0_g1_i1	65.19
TR17862|c0_g1_i1	155.56
TR17865|c0_g1_i1	150.05
TR17866|c0_g2_i1	115.04
TR1787|c0_g1_i1	197.04
TR1788|c0_g1_i1	15.31
TR17894|c0_g1_i1	16.63
TR17900|c0_g1_i1	18.96
TR17911|c0_g1_i1	17.87
TR17935|c0_g1_i1	23.2
TR17947|c0_g1_i1	12.11
TR17955|c0_g1_i1	59.29
TR17969|c0_g1_i1	31.14
TR17992|c0_g1_i1	19.27
TR18016|c0_g1_i1	39.9
TR18016|c0_g1_i2	149.83
TR18037|c0_g1_i2	14.2
TR18046|c0_g1_i1	12.28
TR18096|c0_g1_i1	14.12
TR18104|c0_g1_i1	19.23
TR18111|c0_g1_i1	10.13
TR18118|c0_g1_i1	6.36
TR18140|c0_g1_i1	139.08
TR1816|c0_g1_i1	18.77
TR18163|c0_g1_i1	15.81
TR18175|c0_g1_i1	9.48
TR18179|c0_g1_i1	16.98
TR18189|c0_g1_i1	34.67
TR18270|c0_g1_i1	7.38
TR18273|c0_g1_i1	10.16
TR18286|c0_g1_i1	21.82
TR18288|c0_g1_i1	114.8
TR18306|c0_g1_i1	9.11
TR18322|c0_g2_i1	8.49
TR18325|c0_g1_i1	33.88
TR18351|c0_g1_i1	120.96
TR18364|c0_g1_i1	43.03
TR18366|c0_g1_i1	8.35
TR18408|c0_g1_i1	9.62
TR18414|c0_g1_i1	25.98
TR18414|c0_g3_i1	43.42
TR18417|c0_g1_i1	17.84
TR18435|c0_g1_i1	23.45
TR1849|c0_g1_i1	22.24
TR18497|c0_g1_i1	22.16
TR18522|c0_g1_i2	33.47
TR18523|c0_g1_i1	9.16
TR18527|c0_g4_i1	8.03
TR18559|c0_g1_i3	18.89
TR18579|c0_g1_i1	27.39
TR18595|c0_g1_i1	30.08
TR18608|c0_g1_i1	20.27
TR1861|c0_g1_i2	12.12
TR18620|c0_g1_i1	74.01
TR18639|c0_g1_i1	23.98
TR18677|c0_g1_i1	19.53
TR18682|c0_g1_i1	43.33
TR18687|c0_g1_i1	15.03
TR18710|c0_g1_i2	8.21
TR18723|c0_g1_i2	16.23
TR18726|c0_g1_i1	33.65
TR18764|c0_g1_i1	13.81
TR18771|c0_g1_i1	114.38
TR18784|c0_g1_i1	31.88
TR18805|c0_g1_i2	43.47
TR18807|c0_g1_i1	126.97
TR18836|c0_g1_i1	93.59
TR18839|c0_g2_i1	236.87
TR18847|c0_g1_i1	57.67
TR18848|c0_g1_i1	7.91
TR18849|c0_g1_i2	64.19
TR18888|c0_g1_i1	17.71
TR18894|c0_g1_i1	9.21
TR18896|c0_g1_i1	42.9
TR18900|c1_g1_i1	9.13
TR18914|c0_g1_i2	134.93
TR18928|c0_g1_i1	81.57
TR19006|c0_g1_i1	201.12
TR19008|c0_g1_i1	228.27
TR19026|c0_g1_i1	11.28
TR19030|c0_g1_i2	56.57
TR19036|c0_g1_i1	11.74
TR19036|c0_g2_i1	14.71
TR19040|c0_g1_i1	106.43
TR19040|c0_g1_i2	6.72
TR19040|c0_g2_i2	22.4
TR19054|c0_g1_i1	10.01
TR19059|c0_g1_i1	48.73
TR19069|c0_g1_i1	155.6
TR19108|c0_g1_i1	117.92
TR19118|c0_g1_i1	39.47
TR19122|c0_g1_i1	17.69
TR19137|c0_g1_i2	60.04
TR19140|c0_g1_i1	163.78
TR19144|c0_g1_i1	7.11
TR19149|c0_g1_i1	11.56
TR19155|c0_g1_i1	35.1
TR19175|c0_g1_i1	13.74
TR19193|c0_g1_i1	38.51
TR1922|c0_g1_i1	18.25
TR19223|c0_g1_i1	27.71
TR19229|c0_g1_i1	22.58
TR19239|c0_g1_i1	13.93
TR19242|c0_g1_i1	20.79
TR19244|c0_g1_i1	17.38
TR19254|c0_g1_i1	91.3
TR19279|c0_g1_i1	34.15
TR19288|c0_g1_i1	45.46
TR19291|c0_g1_i3	47.83
TR19302|c0_g1_i1	28.02
TR19303|c0_g1_i1	41.24
TR19360|c0_g1_i1	21.59
TR19377|c0_g1_i1	52.2
TR19383|c0_g1_i2	67.5
TR19385|c0_g1_i1	7.37
TR19389|c0_g1_i1	36.66
TR19435|c0_g1_i1	138.18
TR19438|c0_g1_i1	13.74
TR19449|c0_g1_i1	44.03
TR19470|c0_g1_i1	14.72
TR19485|c0_g1_i1	42.02
TR19486|c0_g2_i1	34.97
TR19488|c0_g1_i1	71.52
TR19498|c0_g1_i1	17.22
TR19514|c0_g1_i1	36.55
TR19514|c0_g1_i2	17.06
TR19546|c0_g2_i1	29.98
TR19553|c0_g1_i1	57.64
TR19561|c0_g1_i1	27.98
TR19573|c0_g1_i1	24.23
TR1959|c0_g1_i1	22.51
TR19591|c0_g1_i1	27.69
TR19603|c0_g2_i1	31.3
TR19613|c0_g2_i1	20.66
TR19631|c0_g2_i1	53.81
TR19637|c0_g1_i2	45.45
TR19662|c0_g1_i1	10.14
TR19685|c0_g1_i1	23.75
TR19688|c0_g2_i1	161.22
TR19716|c0_g1_i1	123.72
TR19720|c0_g1_i1	5.63
TR19730|c0_g1_i1	9.34
TR19734|c0_g1_i1	146.13
TR19748|c0_g1_i1	20.46
TR19751|c0_g2_i1	25.88
TR19773|c0_g1_i1	11.53
TR19773|c0_g1_i2	25.08
TR19835|c0_g1_i1	12.05
TR19839|c0_g1_i1	18.91
TR19861|c0_g1_i1	11.01
TR19865|c0_g1_i1	17.95
TR19875|c0_g1_i2	351.82
TR19879|c0_g1_i1	59.91
TR19890|c0_g1_i2	8.39
TR19890|c0_g1_i3	47.78
TR19890|c0_g1_i4	0
TR19897|c0_g1_i1	25.26
TR1990|c0_g1_i1	13.28
TR19902|c0_g1_i1	12
TR19903|c0_g1_i1	27.84
TR19914|c0_g1_i1	80.42
TR19914|c0_g1_i2	47.97
TR19950|c0_g2_i1	11.73
TR19961|c0_g1_i1	217.96
TR19972|c0_g1_i1	16.94
TR19981|c0_g1_i1	18.47
TR19984|c0_g1_i1	86.96
TR20014|c0_g1_i1	118.64
TR20014|c0_g1_i2	19.05
TR20021|c0_g1_i1	37.95
TR20022|c0_g1_i1	14.92
TR20027|c0_g1_i1	76.63
TR20032|c0_g1_i1	45.42
TR20054|c0_g1_i1	24.94
TR20059|c0_g2_i1	21.48
TR2006|c0_g1_i1	18.44
TR20060|c0_g2_i1	22
TR20066|c0_g1_i1	748.21
TR20091|c0_g1_i1	60.61
TR2012|c0_g2_i1	102.16
TR20124|c0_g2_i1	2.3
TR20125|c0_g1_i1	5.47
TR20127|c0_g1_i1	9.45
TR20137|c0_g1_i2	217.55
TR20144|c0_g1_i2	44.78
TR20145|c0_g1_i1	77.47
TR20160|c0_g1_i1	18.02
TR20169|c0_g1_i1	50.08
TR20199|c0_g1_i2	9.99
TR20200|c0_g1_i1	10.94
TR20238|c0_g1_i1	25.65
TR20255|c0_g1_i1	9.98
TR20263|c0_g1_i2	16.67
TR20267|c0_g1_i1	26.47
TR2027|c0_g1_i1	14.42
TR20276|c0_g1_i2	68.89
TR20277|c0_g1_i1	17.97
TR20285|c0_g1_i1	26.01
TR20294|c0_g1_i1	21.91
TR20317|c0_g1_i1	49.66
TR20327|c1_g1_i1	10.25
TR20328|c0_g1_i1	14.11
TR20337|c0_g1_i2	24.45
TR20346|c0_g1_i1	90.49
TR20347|c1_g1_i1	33.3
TR2035|c0_g1_i1	23.21
TR20363|c0_g1_i1	18.35
TR20363|c0_g1_i2	43.09
TR20366|c0_g2_i1	340.6
TR20368|c0_g1_i1	78.49
TR20371|c0_g1_i1	9.2
TR20386|c0_g1_i1	12.79
TR20401|c0_g2_i1	25.57
TR20410|c0_g1_i1	27.41
TR20413|c0_g2_i1	164.26
TR20436|c0_g1_i1	65.55
TR20442|c0_g1_i1	41.02
TR20450|c0_g1_i1	50.43
TR20465|c0_g1_i1	13.59
TR20467|c0_g2_i1	8.35
TR20471|c0_g1_i1	213.21
TR20472|c0_g1_i1	18.81
TR20472|c0_g1_i2	0
TR20480|c0_g1_i1	27.5
TR20497|c0_g1_i1	132.25
TR20504|c0_g1_i1	13.79
TR2051|c0_g1_i1	12.88
TR20531|c0_g1_i1	12.78
TR20532|c0_g1_i1	11.23
TR20532|c0_g1_i2	10.7
TR20532|c0_g2_i1	9.48
TR20537|c0_g1_i1	20.27
TR20541|c0_g1_i1	16.81
TR20558|c0_g2_i1	14.17
TR20559|c0_g1_i1	11.61
TR20560|c0_g2_i2	9.78
TR20565|c0_g1_i1	252.71
TR20566|c0_g1_i1	15.31
TR20597|c0_g1_i3	57.7
TR20597|c0_g1_i4	4.29
TR20613|c0_g1_i1	12.93
TR20645|c0_g1_i1	22.85
TR20664|c0_g1_i1	28.42
TR20669|c0_g1_i1	17.5
TR20673|c0_g1_i1	26.74
TR20687|c0_g1_i1	27.49
TR20689|c0_g1_i1	7.81
TR20710|c1_g1_i3	7.4
TR20710|c1_g1_i5	9.74
TR20714|c0_g1_i4	9.45
TR20726|c0_g1_i1	23.24
TR20732|c0_g1_i2	24.3
TR20733|c0_g1_i1	10.36
TR20734|c0_g1_i1	15.63
TR20737|c0_g1_i1	25.52
TR20740|c0_g1_i2	32.39
TR20758|c0_g1_i1	30.62
TR20767|c0_g1_i2	31.18
TR20773|c0_g1_i2	73.11
TR20774|c0_g1_i1	35.73
TR20779|c0_g1_i1	57.74
TR20784|c0_g1_i1	11.62
TR20787|c0_g1_i2	16.7
TR20789|c0_g1_i1	7.22
TR20791|c0_g1_i1	39.49
TR20792|c0_g1_i1	25.76
TR20796|c0_g1_i1	17.05
TR20796|c0_g1_i3	16.18
TR20806|c0_g1_i1	50.49
TR20820|c0_g1_i1	14.47
TR20839|c0_g1_i2	25.2
TR20882|c0_g2_i1	33.65
TR20885|c1_g1_i1	9.24
TR20887|c0_g1_i1	28.84
TR20903|c0_g1_i3	12.09
TR20911|c0_g1_i1	17.6
TR20913|c0_g1_i1	41.43
TR20918|c0_g1_i1	101.28
TR20919|c0_g1_i1	25.71
TR20941|c0_g1_i1	30.05
TR2095|c0_g1_i1	10.62
TR20986|c0_g1_i1	49.37
TR20986|c0_g1_i2	16.42
TR20989|c0_g1_i1	21.57
TR21007|c0_g1_i4	13.64
TR21008|c0_g1_i2	14.5
TR21009|c0_g1_i1	9.17
TR21011|c1_g1_i1	23.88
TR21023|c0_g1_i1	24.63
TR21031|c0_g1_i2	75.75
TR21042|c0_g1_i5	13.2
TR21046|c0_g1_i2	13.41
TR21050|c0_g1_i2	26.08
TR21055|c0_g1_i3	1.35
TR21055|c0_g1_i4	6.73
TR21060|c0_g1_i1	28.71
TR21074|c0_g1_i2	16.05
TR21081|c0_g1_i1	24.86
TR21083|c0_g1_i1	26.82
TR21101|c0_g1_i5	100.46
TR21104|c0_g1_i1	42.19
TR21116|c0_g1_i1	16.78
TR21126|c0_g2_i1	19.51
TR21129|c0_g1_i1	24.58
TR21130|c0_g1_i1	14
TR21130|c0_g1_i2	0
TR21132|c0_g1_i2	27.18
TR21140|c0_g1_i1	18.07
TR21147|c0_g2_i1	40.91
TR21148|c0_g1_i1	21.19
TR21158|c0_g1_i1	17.13
TR21169|c0_g3_i1	16.26
TR21177|c0_g1_i1	18.95
TR21178|c0_g1_i1	229.14
TR21180|c0_g2_i2	94.57
TR21190|c0_g1_i1	15.56
TR21194|c0_g1_i1	47.78
TR21195|c0_g1_i2	17.3
TR21217|c0_g1_i1	51.73
TR21223|c0_g1_i1	47.62
TR21249|c0_g1_i2	63.18
TR21261|c0_g1_i1	36.96
TR21281|c0_g1_i1	48.07
TR21282|c1_g1_i3	10.25
TR21282|c2_g1_i1	68.1
TR21288|c0_g1_i1	27.92
TR21292|c0_g1_i1	30.04
TR21294|c0_g1_i1	26.21
TR21296|c0_g1_i1	30.99
TR21299|c0_g1_i1	17.19
TR21323|c0_g1_i2	20.15
TR2133|c0_g1_i1	31.07
TR21331|c0_g1_i1	93.84
TR21342|c0_g1_i1	13.69
TR21347|c0_g1_i1	19.92
TR21376|c0_g1_i1	19.11
TR21383|c0_g2_i1	16.76
TR21385|c0_g1_i1	106.16
TR21397|c0_g1_i1	10.33
TR21406|c0_g1_i3	5.76
TR21406|c0_g1_i4	24.79
TR21410|c0_g1_i1	76.49
TR21411|c0_g1_i1	11.94
TR21413|c0_g1_i1	18.7
TR21422|c0_g1_i1	26.52
TR21433|c0_g1_i1	14.06
TR21445|c0_g1_i1	32.52
TR2145|c0_g1_i1	17.27
TR21450|c0_g1_i1	20.84
TR21454|c0_g1_i1	56.74
TR21455|c0_g1_i1	39.75
TR21456|c0_g1_i1	199.73
TR21464|c0_g1_i1	37.02
TR21468|c0_g1_i1	50.53
TR2149|c0_g1_i1	19.51
TR21490|c1_g1_i1	37.21
TR21496|c1_g1_i1	3.84
TR21496|c1_g1_i2	1.5
TR21497|c0_g1_i2	30.53
TR21501|c0_g1_i1	33.28
TR21513|c0_g1_i1	21.88
TR21517|c0_g1_i1	11.53
TR21517|c0_g2_i1	27.62
TR21522|c0_g2_i1	32
TR21532|c0_g1_i1	458.12
TR2157|c0_g1_i3	3.35
TR2157|c0_g3_i1	29.73
TR2158|c0_g1_i2	5.11
TR2159|c0_g1_i1	18.67
TR2160|c0_g1_i1	7.84
TR2160|c0_g1_i2	12.95
TR21606|c0_g1_i1	16.74
TR2161|c0_g8_i1	96.34
TR21614|c0_g1_i1	8.76
TR2163|c0_g1_i1	63.66
TR2163|c0_g1_i2	0
TR2163|c0_g1_i3	21.85
TR2163|c0_g3_i1	24.53
TR2163|c0_g3_i2	15.56
TR21630|c0_g1_i2	59.74
TR21633|c0_g1_i1	20.48
TR21645|c0_g1_i1	13.98
TR21648|c0_g1_i1	32.17
TR2165|c0_g1_i1	25.42
TR2165|c0_g1_i2	9.44
TR21651|c0_g1_i2	19.79
TR21658|c0_g1_i1	18.74
TR2167|c0_g1_i4	6.28
TR21671|c0_g1_i1	13.16
TR21678|c0_g1_i1	19.92
TR21679|c1_g2_i1	19.56
TR21681|c0_g1_i1	13.26
TR2169|c0_g3_i1	32.15
TR2169|c0_g4_i1	27.07
TR21693|c0_g1_i2	11.58
TR21697|c0_g1_i1	90.09
TR21699|c0_g1_i1	254.39
TR2170|c1_g3_i1	14.61
TR21701|c0_g1_i1	16.02
TR21701|c0_g2_i1	12.56
TR21702|c0_g1_i1	7.59
TR2171|c0_g1_i1	213.23
TR2171|c0_g1_i2	355.63
TR2171|c0_g2_i2	81.04
TR2171|c0_g2_i4	274.34
TR2171|c0_g2_i6	394.94
TR21714|c0_g1_i2	4.8
TR21719|c1_g1_i2	11.37
TR21723|c0_g1_i1	7.42
TR21724|c0_g1_i2	23.08
TR21737|c0_g1_i1	60.96
TR21743|c0_g1_i1	12.32
TR21746|c0_g1_i1	14.36
TR21750|c0_g1_i1	31.4
TR21751|c0_g1_i1	27.15
TR21755|c0_g1_i4	13.62
TR21756|c0_g1_i1	12.15
TR2176|c0_g1_i1	4.3
TR2176|c0_g1_i5	3.89
TR2176|c0_g1_i8	7.5
TR2176|c0_g4_i1	13.08
TR21762|c0_g1_i1	19.1
TR21765|c0_g1_i1	18.5
TR2177|c0_g1_i2	9.62
TR21776|c0_g1_i1	2.07
TR21776|c0_g1_i3	13.93
TR21776|c0_g2_i1	6.59
TR2178|c4_g2_i1	31.03
TR2178|c5_g1_i2	11.7
TR21781|c0_g1_i1	22.93
TR21782|c0_g1_i1	18.75
TR2179|c0_g1_i1	114.23
TR2179|c0_g1_i3	57.64
TR21794|c0_g1_i2	9.78
TR2180|c0_g1_i3	11.69
TR2180|c0_g1_i8	18.42
TR21800|c0_g1_i1	7.02
TR2181|c0_g2_i1	24.16
TR21814|c0_g1_i1	20.93
TR2182|c0_g1_i1	6.06
TR21823|c0_g1_i1	50.1
TR21844|c0_g1_i1	21.14
TR21844|c0_g1_i2	33.34
TR21846|c0_g1_i1	39.44
TR21846|c0_g2_i1	20.17
TR21846|c0_g3_i1	27.37
TR21846|c0_g4_i1	60.84
TR21857|c0_g1_i1	23.72
TR21860|c0_g1_i1	29.05
TR21870|c0_g1_i1	9.57
TR21873|c0_g1_i1	16.59
TR2188|c0_g1_i5	43.69
TR2188|c0_g1_i6	22.16
TR2188|c0_g5_i1	40.21
TR21889|c0_g1_i1	22.99
TR2189|c0_g1_i1	191.54
TR21896|c0_g1_i1	11.41
TR21902|c0_g1_i1	69.51
TR2192|c0_g2_i1	33.71
TR2192|c0_g2_i3	33.75
TR2192|c0_g2_i4	29.16
TR2192|c0_g2_i6	48.98
TR21923|c0_g2_i1	19.14
TR21923|c0_g2_i2	32.37
TR2193|c0_g1_i2	18.42
TR21937|c0_g1_i1	20.26
TR2194|c0_g1_i2	8.64
TR2194|c0_g1_i3	21.97
TR21940|c0_g1_i2	7.75
TR21946|c0_g1_i1	18.58
TR21949|c0_g1_i1	58.53
TR21949|c0_g3_i1	29.82
TR21949|c0_g3_i2	38.51
TR2195|c0_g1_i3	44.22
TR2195|c0_g1_i4	12.02
TR2195|c0_g1_i8	5.66
TR2195|c0_g1_i9	29.62
TR21956|c0_g1_i1	37.07
TR21959|c0_g1_i1	17.7
TR2196|c0_g1_i1	39.12
TR2197|c0_g1_i1	64.64
TR2197|c0_g2_i2	33.88
TR2197|c0_g2_i4	19.4
TR21986|c0_g1_i1	9.69
TR22002|c1_g1_i1	34.88
TR22002|c1_g1_i5	62.61
TR22009|c0_g1_i1	45.19
TR2201|c0_g1_i1	24.74
TR2201|c0_g3_i1	31
TR2201|c0_g3_i2	15.52
TR22014|c0_g1_i1	21.43
TR22023|c0_g1_i1	23.82
TR22023|c0_g1_i3	23.74
TR22025|c0_g1_i1	17.59
TR22036|c0_g2_i1	24.21
TR22051|c0_g1_i1	8.46
TR2207|c0_g1_i1	1.08
TR2207|c0_g1_i2	8.59
TR2207|c0_g1_i7	2.32
TR2208|c1_g1_i2	14.1
TR22084|c0_g1_i1	83.29
TR22084|c0_g1_i2	27.11
TR2209|c0_g3_i2	13.77
TR2209|c0_g3_i3	33.14
TR22093|c0_g1_i1	38.76
TR22095|c0_g1_i1	9.51
TR22098|c0_g1_i2	38.15
TR22110|c0_g3_i1	39.85
TR22115|c0_g1_i1	58.94
TR2212|c1_g1_i1	65.86
TR2212|c1_g1_i2	37.44
TR2212|c1_g2_i1	25.39
TR2212|c1_g2_i2	32.38
TR22122|c0_g1_i1	6.04
TR22128|c0_g1_i3	8.59
TR2213|c0_g1_i1	91.78
TR22134|c0_g1_i2	9.78
TR22136|c0_g1_i1	27.89
TR2214|c1_g1_i1	43.5
TR2214|c2_g1_i1	243.42
TR2214|c2_g1_i2	95.25
TR2214|c3_g2_i1	178.84
TR2214|c3_g4_i1	183.21
TR2214|c3_g9_i1	156.45
TR22158|c0_g1_i1	16.97
TR2216|c1_g1_i1	35.5
TR2216|c1_g2_i1	33.61
TR2216|c1_g5_i1	8.35
TR22166|c0_g1_i2	8.48
TR2217|c0_g1_i2	69.69
TR2217|c1_g1_i2	4.46
TR2217|c1_g2_i1	36.39
TR22171|c1_g4_i1	399.86
TR2218|c1_g2_i1	23.23
TR22180|c0_g1_i1	10.06
TR22194|c0_g1_i1	10.18
TR22196|c0_g1_i1	27.79
TR22205|c0_g1_i1	15.97
TR2221|c0_g1_i2	33.42
TR22215|c0_g1_i1	23.72
TR22223|c0_g1_i2	7.76
TR22225|c0_g1_i1	39.48
TR2223|c0_g1_i3	8.89
TR22245|c0_g1_i1	15.53
TR2225|c1_g11_i1	172.83
TR2225|c1_g11_i10	42.2
TR2225|c1_g11_i2	93.1
TR2225|c1_g11_i5	94.18
TR2225|c1_g11_i8	51.17
TR2225|c1_g12_i1	49.55
TR22251|c0_g1_i1	34.28
TR22259|c0_g1_i1	8.73
TR22259|c0_g1_i2	9.19
TR2226|c0_g1_i1	39.91
TR2228|c0_g2_i2	33.32
TR22282|c0_g1_i1	43.96
TR22286|c0_g1_i1	19.89
TR22292|c0_g1_i1	29.45
TR22308|c0_g1_i1	194.98
TR2231|c0_g1_i1	13.8
TR22310|c0_g1_i1	37.72
TR2232|c0_g1_i1	16.79
TR22333|c0_g1_i1	19.42
TR22337|c0_g1_i1	14.67
TR2236|c0_g1_i1	12.36
TR22370|c0_g1_i1	13.2
TR22379|c0_g1_i1	264.49
TR2238|c0_g1_i1	8.29
TR2238|c0_g1_i4	2.32
TR22386|c0_g1_i1	48.35
TR2239|c0_g3_i1	87.08
TR2239|c0_g3_i3	127.62
TR2239|c0_g3_i4	6.83
TR22390|c0_g1_i1	11.78
TR22408|c0_g1_i1	18.6
TR22412|c0_g1_i1	41.95
TR22419|c0_g1_i1	11.78
TR22423|c0_g1_i1	23.76
TR2243|c0_g1_i1	10.15
TR2243|c0_g1_i2	21.87
TR2243|c0_g2_i1	20.8
TR22431|c0_g1_i1	42.02
TR22432|c0_g1_i1	26.59
TR22435|c0_g1_i1	14.63
TR22438|c0_g1_i1	18.9
TR2244|c1_g1_i6	259.62
TR2244|c1_g1_i7	252.58
TR2244|c1_g1_i8	83.17
TR22440|c0_g1_i2	20.99
TR22446|c0_g2_i1	19.33
TR22447|c0_g1_i1	26.31
TR2245|c4_g1_i1	13.14
TR2246|c0_g1_i1	34.13
TR2247|c0_g1_i1	13.91
TR2248|c0_g1_i2	15.76
TR2248|c0_g1_i5	24.94
TR2248|c1_g3_i1	47.98
TR22493|c0_g1_i1	8.62
TR2250|c2_g2_i2	21.91
TR2250|c3_g1_i1	113.35
TR2250|c3_g1_i2	58.33
TR2253|c1_g2_i1	104.13
TR22531|c0_g1_i1	26.07
TR22536|c0_g1_i1	44.9
TR2254|c0_g1_i1	27.83
TR2254|c0_g1_i10	16.74
TR2255|c10_g1_i1	159.22
TR2255|c10_g3_i3	23.9
TR2255|c10_g4_i1	24.89
TR22554|c0_g1_i1	29.32
TR2256|c0_g1_i2	66.91
TR2256|c1_g2_i2	22.11
TR2256|c2_g1_i1	52.04
TR2256|c3_g1_i1	71.57
TR2256|c3_g1_i2	111.74
TR2256|c3_g1_i3	55.38
TR2256|c3_g1_i9	23.89
TR22560|c0_g1_i1	7.91
TR22564|c0_g2_i1	17.16
TR22581|c0_g1_i2	11.24
TR22583|c1_g1_i1	10.42
TR2259|c1_g1_i1	29.01
TR2259|c1_g1_i3	2.61
TR22590|c0_g1_i1	28.44
TR22599|c0_g1_i1	17.12
TR22599|c0_g2_i1	7.96
TR2260|c0_g2_i1	208.14
TR2260|c0_g3_i1	255.28
TR2260|c0_g3_i2	353.04
TR22601|c0_g1_i1	52.69
TR22608|c1_g1_i3	22.6
TR2261|c0_g1_i1	59.89
TR2261|c0_g2_i1	69.76
TR2261|c0_g2_i3	194.46
TR2261|c0_g3_i2	140.33
TR2261|c0_g4_i1	123.85
TR2261|c0_g5_i1	24.47
TR22619|c0_g1_i1	27.79
TR2262|c0_g1_i1	22.48
TR2262|c0_g7_i1	14.44
TR2263|c1_g1_i8	41.27
TR22639|c0_g1_i1	15.63
TR2264|c0_g1_i2	23.53
TR2264|c0_g1_i4	12.19
TR2264|c0_g2_i1	0.74
TR2265|c0_g4_i1	8.29
TR22658|c0_g1_i1	43.99
TR22658|c0_g2_i2	67.9
TR2266|c0_g1_i1	44.73
TR2266|c0_g1_i2	160.22
TR2266|c0_g1_i3	239.4
TR22661|c1_g1_i2	181.85
TR22678|c0_g1_i2	11.51
TR22687|c0_g1_i1	30.21
TR22689|c0_g1_i1	14
TR22689|c0_g3_i1	7.15
TR22709|c0_g1_i1	11.28
TR22716|c0_g1_i1	9.1
TR22724|c0_g1_i1	70.04
TR22729|c0_g1_i1	19.51
TR2273|c1_g1_i2	19.01
TR2273|c1_g1_i3	136.16
TR22739|c0_g1_i1	149.6
TR22739|c0_g2_i1	89.84
TR22739|c0_g3_i1	174.15
TR22739|c0_g3_i2	228.67
TR2274|c0_g1_i3	12.28
TR22746|c0_g1_i3	17.65
TR22747|c0_g1_i2	7.6
TR2277|c0_g1_i1	10.9
TR2277|c0_g1_i2	3.31
TR2277|c0_g1_i3	6.69
TR22774|c0_g1_i2	215.41
TR22780|c0_g1_i1	20.39
TR22789|c0_g1_i1	18.38
TR2279|c0_g3_i2	8.24
TR22790|c0_g1_i2	16.26
TR22792|c0_g1_i1	71.17
TR22799|c0_g1_i1	13.99
TR2280|c0_g1_i1	454.17
TR2280|c0_g4_i2	313.39
TR22803|c0_g1_i1	14.06
TR22805|c0_g1_i1	129.03
TR22817|c0_g2_i1	33.64
TR2282|c0_g1_i1	13.14
TR22821|c0_g1_i2	4.1
TR22823|c0_g1_i2	47.95
TR22829|c0_g1_i1	28.52
TR2283|c0_g1_i1	21.33
TR2283|c0_g5_i1	135.82
TR22835|c0_g1_i1	10.31
TR2284|c0_g3_i1	9.16
TR2284|c0_g5_i1	5.81
TR22846|c0_g1_i1	47.2
TR22846|c0_g1_i2	12.56
TR22855|c0_g1_i2	5.8
TR22859|c0_g1_i1	8.21
TR2286|c0_g1_i3	12.19
TR22863|c0_g1_i1	189.85
TR22865|c0_g1_i1	21.55
TR22869|c0_g1_i1	9.31
TR22878|c0_g1_i1	13.39
TR22885|c0_g1_i1	13.96
TR22885|c0_g2_i1	8.94
TR22894|c0_g1_i1	27.57
TR22894|c0_g2_i1	4.48
TR22896|c0_g1_i3	15.25
TR2290|c0_g2_i4	36.14
TR22907|c0_g1_i1	6.54
TR22910|c0_g1_i1	22.19
TR22912|c0_g1_i1	58.96
TR22919|c0_g1_i1	11.92
TR22919|c0_g1_i2	3.87
TR22923|c0_g1_i1	19.44
TR22926|c0_g1_i1	44.58
TR22928|c0_g1_i1	15.92
TR2293|c0_g1_i1	3.49
TR2293|c0_g2_i1	14.06
TR2293|c0_g2_i2	4.55
TR22937|c0_g1_i1	19.99
TR2294|c0_g3_i2	91.15
TR2294|c0_g3_i3	31.12
TR2294|c0_g3_i4	38.81
TR2294|c0_g4_i1	4.12
TR2294|c0_g4_i3	28.55
TR2294|c0_g5_i1	22.04
TR2294|c0_g7_i2	10.62
TR22942|c0_g2_i1	10.42
TR22945|c0_g1_i1	12.19
TR22950|c0_g1_i1	15.12
TR2296|c0_g3_i1	20.53
TR2296|c0_g4_i3	14.59
TR2297|c0_g1_i2	8.62
TR2297|c0_g2_i2	4.8
TR2297|c0_g3_i1	95.45
TR2297|c0_g3_i2	33.86
TR22975|c0_g1_i1	17.79
TR22979|c0_g1_i1	20.92
TR22981|c0_g1_i1	20
TR22982|c0_g1_i1	6.55
TR2299|c0_g1_i1	99.46
TR22993|c0_g1_i1	41.54
TR22995|c0_g1_i2	33.04
TR22995|c0_g1_i3	9.34
TR22996|c0_g1_i1	8.88
TR23003|c0_g1_i1	178.55
TR23003|c0_g1_i2	104.13
TR23004|c0_g1_i1	20.87
TR23008|c0_g1_i1	162.24
TR23010|c0_g1_i1	10.65
TR23026|c0_g1_i1	28.72
TR2303|c0_g1_i1	39.69
TR2303|c1_g3_i1	49.74
TR2303|c1_g3_i10	23.26
TR2303|c1_g3_i2	3.24
TR2303|c1_g3_i3	27.86
TR2303|c1_g3_i4	11.25
TR2303|c1_g3_i5	103.58
TR2303|c1_g3_i8	138.05
TR23035|c0_g1_i1	91.09
TR2304|c0_g1_i1	29.83
TR2304|c0_g1_i3	14.69
TR23041|c0_g1_i1	11.78
TR23042|c0_g2_i1	11.6
TR23044|c0_g1_i3	36.31
TR23047|c0_g2_i1	19.42
TR23048|c0_g1_i1	15.63
TR23052|c0_g2_i1	54.01
TR23059|c0_g1_i3	7.11
TR2306|c0_g3_i1	6.02
TR23066|c0_g1_i1	23.05
TR2307|c0_g1_i1	76.73
TR23080|c0_g1_i1	17.65
TR23080|c0_g2_i1	4.4
TR23088|c0_g1_i3	411.26
TR23088|c0_g2_i1	923.64
TR2309|c0_g1_i3	6.28
TR23092|c0_g1_i1	6.2
TR23095|c0_g1_i1	38.28
TR23099|c0_g1_i1	9.71
TR2310|c0_g1_i3	14.7
TR23102|c0_g1_i1	21.28
TR23104|c0_g1_i1	6.88
TR23105|c1_g2_i3	13.94
TR23106|c0_g1_i1	36.33
TR23106|c1_g1_i1	29.18
TR2311|c0_g1_i1	22.45
TR2312|c0_g4_i10	2.57
TR2312|c0_g4_i5	32.83
TR23121|c0_g1_i1	41.44
TR2313|c0_g1_i1	18.9
TR2313|c0_g1_i2	7.13
TR23131|c0_g1_i1	26.73
TR23132|c0_g2_i1	21.77
TR23134|c1_g1_i1	10.77
TR23135|c0_g1_i2	18.24
TR23138|c0_g1_i1	409.51
TR2314|c0_g1_i2	5.21
TR23144|c0_g1_i4	5.57
TR23144|c0_g1_i5	1.3
TR23151|c0_g1_i1	9.76
TR23152|c0_g1_i2	20.98
TR2316|c0_g1_i1	92.71
TR2316|c0_g1_i2	48.51
TR2316|c0_g1_i4	25.53
TR23163|c0_g3_i1	19.24
TR23163|c0_g4_i1	2.58
TR2317|c1_g1_i1	881.02
TR23174|c0_g1_i1	45.42
TR23174|c0_g2_i1	4.6
TR2318|c0_g1_i10	18.06
TR2318|c0_g1_i6	11
TR23182|c0_g2_i2	118.08
TR23182|c0_g2_i3	104.1
TR2320|c0_g1_i1	29.13
TR2320|c0_g5_i1	31.85
TR2320|c0_g5_i2	33.48
TR23204|c0_g1_i1	32.31
TR2321|c0_g1_i1	56.03
TR2321|c1_g1_i2	60.08
TR23211|c1_g1_i1	16.53
TR23211|c1_g1_i2	24.72
TR23222|c0_g1_i1	16.79
TR2323|c0_g1_i2	1.51
TR23231|c0_g1_i1	42.54
TR2324|c0_g1_i1	18.37
TR2324|c0_g1_i2	5.76
TR23247|c0_g3_i2	170.49
TR23249|c0_g1_i2	20.99
TR23249|c0_g1_i3	43.73
TR2325|c0_g1_i2	12.76
TR23253|c0_g1_i1	35.26
TR23257|c0_g1_i1	20.39
TR23258|c0_g1_i1	18.83
TR2326|c0_g1_i2	4.74
TR2326|c0_g1_i6	5.79
TR2326|c0_g1_i8	0
TR2327|c0_g2_i1	18.29
TR2327|c0_g4_i1	31.72
TR23274|c0_g1_i2	10.69
TR23278|c0_g1_i1	12.64
TR23279|c0_g1_i1	8.92
TR2328|c0_g1_i1	5.36
TR2328|c0_g1_i4	8.74
TR23282|c0_g1_i1	26.82
TR23283|c0_g1_i1	0
TR23283|c0_g1_i2	6.03
TR23285|c0_g1_i2	19.41
TR2329|c0_g2_i1	135.97
TR2329|c0_g3_i3	90.14
TR2329|c0_g3_i6	164.56
TR23294|c0_g1_i1	15.98
TR23296|c0_g1_i1	14.66
TR23299|c0_g1_i1	6.24
TR2330|c0_g1_i2	10.35
TR23300|c0_g1_i1	63.22
TR23302|c0_g1_i1	19.5
TR23304|c0_g1_i1	16.43
TR23316|c0_g1_i1	82.25
TR23317|c0_g2_i1	47.85
TR2332|c0_g1_i3	6.03
TR23326|c0_g1_i1	62.91
TR23329|c0_g1_i1	80.04
TR2333|c0_g1_i1	25.86
TR23335|c0_g1_i1	21.3
TR23337|c0_g1_i1	0
TR23337|c0_g2_i1	110.81
TR23348|c0_g1_i2	11.73
TR2335|c0_g1_i1	237.94
TR2335|c0_g2_i1	108.15
TR2335|c0_g4_i1	82.03
TR2336|c1_g1_i6	5.91
TR23374|c0_g1_i1	13.92
TR23376|c0_g3_i1	6.34
TR23376|c0_g4_i1	19.14
TR23379|c1_g1_i1	72.55
TR2338|c0_g1_i1	39.97
TR23382|c0_g1_i1	17.13
TR23384|c0_g1_i1	16.2
TR23395|c0_g1_i1	27.82
TR2340|c0_g1_i5	4.13
TR2340|c0_g1_i8	95.76
TR23408|c0_g1_i1	7.26
TR23408|c0_g1_i2	9.78
TR23408|c0_g1_i3	9.06
TR2341|c0_g1_i1	47.9
TR23413|c0_g1_i1	24.2
TR23415|c0_g1_i2	13.67
TR23426|c0_g1_i1	26.04
TR23426|c0_g2_i1	23.56
TR2343|c0_g2_i1	37.9
TR23439|c0_g1_i1	22.97
TR23442|c0_g1_i1	19.97
TR23446|c0_g1_i1	16.11
TR23447|c1_g1_i2	170.07
TR23447|c1_g1_i3	34.75
TR23448|c0_g1_i1	10.2
TR23450|c0_g1_i2	9.21
TR23453|c0_g1_i1	10.3
TR23454|c0_g2_i1	31.87
TR23456|c0_g1_i1	10.71
TR2346|c2_g2_i1	56.15
TR2346|c2_g3_i2	143.95
TR2346|c2_g3_i3	63.76
TR2346|c2_g3_i5	73.85
TR2346|c2_g3_i6	54.7
TR2346|c2_g3_i7	89.63
TR23462|c0_g1_i1	35.91
TR23463|c0_g1_i1	19.85
TR23469|c0_g1_i1	25.75
TR23473|c0_g1_i1	64.88
TR23476|c0_g1_i1	10.87
TR2348|c0_g1_i4	65.66
TR2348|c0_g1_i6	55.88
TR23480|c0_g1_i1	17.44
TR23488|c0_g2_i1	18.26
TR23489|c0_g1_i2	9.09
TR23489|c0_g1_i3	22.87
TR2349|c0_g1_i1	7.83
TR2349|c1_g1_i2	14.09
TR2349|c1_g1_i6	8.51
TR2349|c1_g1_i9	35.71
TR23491|c0_g1_i1	83.09
TR23491|c1_g1_i1	190.42
TR2350|c0_g2_i1	181.68
TR2350|c0_g2_i4	48.02
TR23503|c0_g1_i1	49.12
TR23503|c0_g1_i2	11.8
TR23503|c0_g2_i1	45.16
TR23508|c0_g2_i1	13.08
TR2351|c0_g1_i1	7.01
TR2351|c1_g1_i1	6.42
TR23510|c0_g1_i2	19.43
TR23511|c0_g2_i1	139.5
TR23512|c0_g1_i2	37.25
TR23516|c0_g1_i1	16.05
TR23519|c1_g1_i1	38.66
TR2352|c0_g1_i2	6.86
TR23520|c0_g1_i1	8.75
TR23525|c0_g1_i1	14
TR23530|c0_g1_i1	13.21
TR23533|c0_g1_i15	1.75
TR23533|c0_g1_i3	1.77
TR23533|c0_g1_i4	2.01
TR23533|c0_g1_i7	1.07
TR23533|c0_g1_i9	2.12
TR23539|c1_g1_i1	20.51
TR2354|c0_g1_i2	4.92
TR23545|c0_g2_i1	24.33
TR23547|c0_g1_i1	10.24
TR23563|c0_g1_i1	10.17
TR23563|c0_g1_i3	4.18
TR23566|c0_g1_i1	72.2
TR23584|c0_g1_i1	16.11
TR2359|c0_g3_i1	5.18
TR23595|c0_g1_i1	46.15
TR23596|c0_g1_i1	11.73
TR23598|c0_g1_i1	25.06
TR2360|c0_g1_i11	7.08
TR2360|c0_g1_i8	2.06
TR23600|c0_g1_i2	19.84
TR23601|c0_g1_i1	37.4
TR23601|c0_g2_i1	42.06
TR23609|c0_g1_i2	29.95
TR23609|c0_g2_i1	17.12
TR2361|c2_g1_i1	17.11
TR2361|c2_g1_i2	19.77
TR2361|c2_g1_i7	40.45
TR23610|c0_g1_i1	10.36
TR23619|c0_g1_i1	19.27
TR2362|c0_g2_i1	8.11
TR2362|c0_g2_i3	7.59
TR23621|c0_g1_i1	38.79
TR23627|c0_g1_i1	8.9
TR2363|c1_g1_i4	5.41
TR23638|c0_g1_i1	99.82
TR23644|c0_g3_i1	17.68
TR23657|c0_g1_i1	25.78
TR23660|c0_g2_i1	4.83
TR23660|c0_g3_i1	12.19
TR23664|c0_g1_i1	30.93
TR2367|c0_g1_i1	13.66
TR2368|c0_g1_i1	265.97
TR23681|c0_g1_i1	76.44
TR23682|c1_g1_i2	25.78
TR23685|c0_g1_i1	20.69
TR2369|c0_g5_i1	34.31
TR23705|c0_g1_i1	20.05
TR23708|c0_g1_i1	24.63
TR23719|c0_g3_i1	85.01
TR2372|c0_g1_i8	8.74
TR23720|c0_g1_i1	19.44
TR23721|c0_g1_i1	40.34
TR23728|c0_g1_i1	176.06
TR23728|c0_g2_i1	155.49
TR2373|c0_g1_i1	21.32
TR2373|c0_g1_i2	46.17
TR23730|c0_g2_i1	32.35
TR23743|c0_g1_i1	26.07
TR23758|c0_g1_i1	8.01
TR23761|c0_g1_i2	7.33
TR23762|c0_g1_i1	28.85
TR23768|c0_g1_i1	36.05
TR23768|c0_g2_i1	12.06
TR23768|c0_g3_i1	15.14
TR23770|c0_g1_i1	74.29
TR23770|c0_g3_i1	14.95
TR23773|c0_g1_i1	11.13
TR23778|c0_g1_i2	97.47
TR2378|c0_g1_i5	8.02
TR23783|c0_g1_i1	87.89
TR23786|c1_g1_i1	16.32
TR23786|c1_g1_i2	33.04
TR23786|c1_g2_i1	3.82
TR23787|c1_g1_i1	23.36
TR23787|c1_g1_i2	37.68
TR23787|c1_g1_i3	83.01
TR23792|c0_g1_i1	29.9
TR2381|c0_g1_i1	16.41
TR2381|c0_g1_i2	10.45
TR23811|c0_g2_i1	25.5
TR23814|c0_g1_i3	8.14
TR2382|c0_g1_i1	107.99
TR2382|c0_g1_i2	94.7
TR23821|c0_g1_i1	29.07
TR23822|c0_g1_i1	8.28
TR23823|c0_g1_i1	219.46
TR2383|c0_g1_i1	745.96
TR2383|c0_g3_i1	895.93
TR2383|c0_g5_i1	698.22
TR2383|c0_g6_i1	1191.73
TR23832|c2_g1_i1	403.84
TR23833|c0_g1_i1	43.67
TR23833|c0_g2_i1	24.48
TR23833|c0_g2_i2	12.84
TR2384|c0_g3_i5	14.64
TR2385|c0_g1_i1	27.8
TR2385|c0_g1_i4	47.26
TR2385|c0_g2_i1	22.43
TR23853|c0_g1_i2	12.41
TR23854|c0_g3_i2	17.38
TR2386|c0_g1_i2	5.12
TR23862|c0_g1_i2	256.3
TR23862|c0_g2_i1	135.44
TR23863|c0_g1_i2	14.2
TR2387|c0_g1_i1	11.48
TR23871|c0_g2_i1	19.55
TR23872|c0_g1_i2	6.23
TR2389|c0_g1_i1	86.38
TR23898|c0_g1_i3	14.42
TR2390|c0_g1_i3	20.87
TR2390|c0_g1_i4	37.96
TR23904|c0_g1_i2	14.56
TR23910|c0_g1_i1	89.15
TR2392|c0_g2_i1	17.69
TR23924|c0_g1_i1	11.46
TR23928|c0_g1_i2	17.64
TR23928|c0_g1_i6	1.87
TR2393|c0_g1_i1	95.02
TR2393|c0_g1_i2	77.87
TR23931|c0_g1_i1	35.24
TR23935|c0_g1_i1	67.55
TR23938|c0_g1_i2	22.07
TR2394|c0_g2_i10	8.43
TR23940|c0_g1_i1	49.88
TR23947|c0_g1_i1	14.96
TR23947|c0_g3_i2	13.07
TR23951|c0_g1_i1	19.42
TR2396|c0_g1_i1	10.97
TR2396|c0_g1_i4	4.68
TR23965|c0_g1_i1	12
TR23969|c1_g1_i1	30.04
TR2397|c0_g1_i2	26.64
TR2397|c0_g1_i3	46.31
TR23971|c0_g1_i1	8.72
TR23972|c0_g1_i1	10.15
TR23973|c0_g1_i1	19.71
TR2398|c0_g1_i1	225.64
TR2398|c0_g1_i2	210.79
TR2398|c0_g1_i3	99.6
TR23983|c0_g1_i2	11.56
TR2399|c0_g1_i2	76.75
TR2399|c0_g1_i3	36.06
TR23990|c0_g1_i2	13.23
TR23996|c0_g1_i2	26.93
TR23997|c0_g1_i1	19.57
TR23998|c0_g1_i2	21.87
TR24003|c0_g1_i1	29.25
TR24004|c0_g1_i1	18.46
TR24005|c0_g1_i1	12.13
TR24008|c0_g1_i2	15.53
TR2401|c0_g1_i2	44.74
TR2401|c0_g2_i1	22.16
TR2401|c0_g3_i2	53.39
TR2401|c0_g3_i3	29.68
TR24014|c0_g1_i1	57.71
TR24016|c0_g1_i1	9.61
TR24021|c1_g1_i1	15.83
TR24033|c0_g1_i1	8.41
TR24034|c0_g1_i1	218.23
TR24035|c1_g2_i2	6.59
TR2404|c0_g1_i1	53
TR24046|c0_g1_i1	22.72
TR24051|c0_g1_i1	16.81
TR24054|c0_g1_i1	18.3
TR24065|c0_g1_i1	13.18
TR2407|c0_g1_i2	2.8
TR24070|c0_g1_i1	12.8
TR24075|c0_g1_i2	9.31
TR2408|c0_g1_i11	7.86
TR2408|c0_g1_i5	41.13
TR2408|c0_g1_i6	22.78
TR24086|c0_g1_i1	10.68
TR24088|c0_g1_i1	20.41
TR2409|c0_g4_i2	25.11
TR24093|c0_g1_i1	10.97
TR24099|c0_g1_i1	11.39
TR2410|c0_g1_i2	25.75
TR2410|c0_g1_i3	22.36
TR24115|c0_g1_i1	9.93
TR24121|c0_g1_i1	30.42
TR24124|c0_g1_i1	26.56
TR24124|c0_g1_i2	13.39
TR24127|c0_g1_i1	16.08
TR2413|c0_g1_i2	56.94
TR2413|c0_g6_i1	39.17
TR2413|c0_g7_i1	13.32
TR24130|c0_g2_i1	8.92
TR24130|c0_g2_i3	15.52
TR24132|c0_g1_i1	14.18
TR24134|c0_g1_i3	15.84
TR2414|c0_g1_i1	28.84
TR2414|c0_g1_i2	54.74
TR2414|c0_g2_i1	108.19
TR2414|c0_g2_i2	69.8
TR24140|c0_g1_i1	140.18
TR24143|c0_g1_i1	40.89
TR2415|c4_g1_i1	12.46
TR2415|c4_g2_i1	57.45
TR24150|c0_g1_i2	4.73
TR24155|c0_g1_i1	22.83
TR24158|c0_g1_i1	13.9
TR2416|c0_g1_i1	85.91
TR2416|c0_g2_i1	52.8
TR2416|c0_g5_i1	125.4
TR2416|c0_g5_i2	59.79
TR24161|c0_g1_i1	9.98
TR24164|c0_g1_i1	19.28
TR24165|c0_g1_i1	47.83
TR2417|c0_g1_i2	3.18
TR24176|c1_g2_i2	17.98
TR24177|c3_g1_i1	73.7
TR24180|c0_g1_i1	779.15
TR24180|c2_g1_i1	55.62
TR24180|c2_g1_i2	89.9
TR24180|c2_g2_i1	34.58
TR24188|c0_g1_i1	33.79
TR24199|c0_g1_i1	11.58
TR24202|c1_g1_i2	96.11
TR24204|c0_g1_i1	22.67
TR24205|c0_g1_i1	10.71
TR24206|c0_g1_i1	24.8
TR24207|c0_g1_i1	26.75
TR24211|c0_g2_i1	33.24
TR24211|c0_g2_i3	5.13
TR24211|c0_g2_i4	7.59
TR24211|c0_g4_i1	7.15
TR24211|c0_g5_i1	2.04
TR24214|c0_g1_i1	12.83
TR24221|c0_g1_i3	15.65
TR2424|c0_g1_i1	15.02
TR2424|c0_g1_i4	3.41
TR2424|c0_g1_i5	7.65
TR2425|c0_g2_i2	14.07
TR2425|c0_g2_i3	118.98
TR2425|c0_g2_i7	0
TR2425|c0_g3_i2	81.21
TR24252|c1_g1_i1	232.22
TR2426|c1_g1_i1	12.67
TR2426|c1_g1_i2	6.47
TR24262|c0_g1_i2	130.92
TR24264|c0_g1_i1	12.03
TR24269|c0_g1_i1	28.74
TR2427|c0_g1_i1	30.99
TR24270|c0_g1_i1	25.28
TR24272|c0_g1_i1	15.57
TR24278|c0_g1_i1	12.7
TR2428|c0_g1_i1	24.25
TR2428|c0_g2_i2	110.28
TR2428|c0_g3_i1	11.54
TR24286|c0_g1_i1	20.59
TR24286|c0_g2_i1	11.48
TR24288|c0_g1_i1	5
TR2429|c0_g2_i1	64.4
TR2429|c0_g2_i3	215.61
TR24290|c0_g1_i3	41.74
TR24292|c0_g1_i1	12.45
TR24293|c0_g1_i1	4.44
TR24293|c0_g1_i2	3.41
TR24299|c0_g2_i1	26.17
TR2430|c0_g1_i2	36.46
TR2430|c0_g1_i4	42.05
TR2430|c0_g1_i5	43.31
TR2430|c0_g1_i6	12.47
TR2430|c0_g1_i7	1.38
TR24301|c0_g1_i1	17.4
TR24308|c0_g1_i1	5.58
TR2431|c1_g1_i1	60.64
TR2431|c1_g1_i2	20.27
TR24324|c0_g1_i1	14.07
TR24325|c0_g1_i3	18.61
TR24331|c0_g1_i1	18.42
TR24331|c0_g2_i1	15.56
TR24332|c0_g1_i1	14.15
TR24334|c0_g1_i1	75.45
TR24342|c2_g1_i1	38.37
TR2435|c0_g2_i1	959.1
TR2435|c0_g2_i2	250.02
TR24353|c0_g2_i1	136.43
TR24354|c0_g1_i2	72.71
TR24357|c0_g1_i1	28.94
TR24362|c0_g1_i1	435.71
TR24367|c1_g1_i1	18.95
TR2437|c0_g1_i1	62.24
TR24370|c0_g1_i1	20.54
TR2438|c0_g1_i1	13.26
TR24381|c0_g1_i1	25.09
TR2439|c0_g1_i1	25.54
TR2439|c0_g1_i2	9.26
TR2439|c0_g1_i3	30.3
TR24390|c0_g1_i3	24
TR24396|c0_g1_i1	11.27
TR24397|c0_g1_i1	13.78
TR24397|c1_g1_i2	7.72
TR24399|c0_g2_i1	93.49
TR2440|c0_g1_i1	69.95
TR2440|c0_g1_i3	51.94
TR24400|c0_g1_i2	36.79
TR24400|c1_g1_i2	25.57
TR24401|c0_g2_i1	10.44
TR2441|c0_g1_i1	12.73
TR2441|c0_g1_i3	31.81
TR24410|c0_g1_i1	25.49
TR24412|c1_g1_i1	4.52
TR24423|c0_g1_i1	8.45
TR24424|c0_g1_i1	20.94
TR24427|c0_g1_i3	31.03
TR2443|c1_g3_i5	41.08
TR2443|c1_g3_i8	42.61
TR2443|c1_g4_i1	60.3
TR24434|c0_g1_i1	7.37
TR2444|c0_g1_i2	39.73
TR2445|c0_g1_i1	4.21
TR2445|c0_g1_i2	17.29
TR2445|c0_g1_i3	35.07
TR2446|c0_g2_i2	9.13
TR24491|c0_g1_i1	25.72
TR24494|c0_g2_i1	18.5
TR24496|c0_g1_i1	30.82
TR24499|c0_g1_i2	5.72
TR24499|c0_g1_i3	7.04
TR24507|c0_g1_i1	30.68
TR24509|c0_g1_i1	14.45
TR24514|c0_g1_i2	21.5
TR24516|c0_g1_i2	12.9
TR24519|c0_g1_i1	25.7
TR24521|c0_g1_i1	22.02
TR24521|c0_g1_i2	26.94
TR24522|c0_g1_i1	14.34
TR24523|c0_g1_i1	16.55
TR24523|c0_g1_i2	55.28
TR24525|c0_g1_i1	37.8
TR24532|c0_g1_i1	13.98
TR24537|c0_g1_i1	4.23
TR24537|c0_g1_i2	13.35
TR24538|c0_g1_i1	23.58
TR24538|c0_g1_i2	14.26
TR2454|c1_g1_i1	10.39
TR2454|c1_g1_i3	23.99
TR2454|c1_g1_i6	8.72
TR24541|c0_g3_i1	10.79
TR24545|c0_g1_i1	153.73
TR2455|c0_g1_i1	17.78
TR24551|c0_g1_i1	16.35
TR24551|c1_g1_i3	14.32
TR24552|c1_g1_i5	13.7
TR24552|c1_g2_i1	5.16
TR24555|c0_g1_i1	6.08
TR24559|c1_g1_i1	14.79
TR24563|c0_g1_i2	8.84
TR24566|c0_g1_i2	14.08
TR2458|c0_g1_i1	9.36
TR24580|c0_g1_i1	21.15
TR24582|c0_g1_i1	50.26
TR24587|c0_g1_i1	7.23
TR24588|c0_g1_i1	26.67
TR24589|c0_g1_i1	15.42
TR2459|c0_g1_i1	18.96
TR2459|c0_g1_i2	4.12
TR24593|c0_g1_i8	78.31
TR24601|c0_g2_i1	81.97
TR24609|c0_g1_i1	14.94
TR2462|c0_g1_i3	14.48
TR2462|c0_g1_i6	45.78
TR2462|c0_g1_i7	6.7
TR2462|c0_g3_i1	36.51
TR2462|c0_g3_i2	29.5
TR24620|c0_g1_i1	28.3
TR24620|c0_g1_i3	23.45
TR24627|c1_g1_i1	20.73
TR24627|c1_g1_i2	21.25
TR24627|c1_g1_i5	5.78
TR2463|c0_g1_i1	28.95
TR24631|c0_g1_i1	30.06
TR24638|c0_g1_i1	6.09
TR2464|c0_g1_i3	3.78
TR24647|c0_g1_i1	22.81
TR24648|c0_g1_i1	54.38
TR24649|c0_g1_i1	6.79
TR2465|c0_g1_i1	77.48
TR2465|c0_g1_i2	6.96
TR2465|c0_g1_i3	22.88
TR2465|c0_g1_i4	14.52
TR2465|c0_g1_i7	14.5
TR24651|c0_g1_i1	16.1
TR24662|c0_g1_i1	13.56
TR24668|c0_g1_i1	15.3
TR24671|c0_g3_i2	0
TR24674|c0_g1_i1	7.68
TR2468|c1_g3_i1	8.29
TR2468|c1_g3_i2	4.94
TR24691|c1_g1_i1	19.95
TR24694|c0_g2_i1	14.78
TR2470|c1_g1_i4	9.67
TR2470|c1_g1_i8	11.77
TR24701|c0_g1_i1	38.95
TR24701|c0_g2_i1	42.6
TR24701|c0_g2_i2	10.63
TR24708|c0_g2_i1	6.18
TR2471|c0_g1_i2	108.78
TR2471|c0_g1_i4	59.25
TR24710|c0_g1_i1	16.7
TR24712|c0_g1_i1	6.62
TR24716|c0_g1_i1	8.81
TR24716|c0_g1_i2	21.09
TR24716|c0_g1_i3	8.28
TR24719|c0_g1_i1	42.06
TR24719|c1_g1_i1	38.03
TR24719|c1_g3_i1	18.18
TR24722|c0_g1_i1	10.66
TR24723|c0_g1_i1	34.26
TR2473|c0_g1_i2	5.01
TR2473|c0_g1_i3	9.06
TR24732|c0_g1_i1	7.99
TR24734|c0_g1_i1	33.06
TR24734|c0_g2_i1	14.01
TR24737|c0_g1_i1	17.92
TR24743|c0_g1_i1	27.69
TR24743|c0_g2_i1	120.3
TR2475|c0_g2_i1	54.02
TR2475|c0_g3_i2	63.09
TR24755|c0_g1_i2	30.02
TR24759|c0_g1_i1	18.08
TR24769|c0_g1_i3	13.85
TR24769|c0_g1_i4	0
TR2477|c0_g2_i1	12.24
TR2477|c0_g2_i3	41.55
TR24786|c0_g1_i1	6.56
TR2479|c0_g1_i1	7.2
TR2479|c0_g1_i3	8.53
TR24790|c0_g2_i1	6.7
TR24792|c0_g1_i2	262.55
TR24792|c0_g1_i3	43.87
TR24792|c0_g2_i1	103.19
TR24793|c0_g1_i1	11.26
TR24795|c0_g1_i2	24
TR24795|c0_g1_i3	113.01
TR24798|c0_g1_i3	159.18
TR24798|c0_g2_i1	134.74
TR24798|c0_g2_i3	212.54
TR24802|c0_g1_i3	13.59
TR24806|c0_g4_i2	11.08
TR24806|c0_g5_i2	3.62
TR24806|c0_g6_i1	10.18
TR24808|c0_g1_i1	20.22
TR24809|c0_g1_i1	29.49
TR24813|c0_g1_i3	12.4
TR24814|c1_g1_i4	25.24
TR24814|c1_g1_i5	76.68
TR24815|c0_g1_i1	31.29
TR24831|c0_g1_i1	10.21
TR24832|c0_g1_i1	15.7
TR24837|c0_g1_i1	12.02
TR24848|c0_g1_i3	24.94
TR2485|c3_g1_i2	112.66
TR24852|c0_g1_i2	18.18
TR24857|c0_g1_i1	88.36
TR2486|c0_g1_i1	47.89
TR2486|c0_g1_i2	30.8
TR2486|c0_g2_i3	77.69
TR2486|c0_g2_i4	34.09
TR2486|c0_g3_i1	45.47
TR24870|c0_g2_i1	13.4
TR24871|c0_g1_i1	30.88
TR24887|c0_g1_i1	13.57
TR24889|c0_g1_i2	8.24
TR24889|c0_g1_i3	15.49
TR24901|c0_g1_i1	321.62
TR24902|c0_g1_i1	58.77
TR24905|c0_g1_i1	46.95
TR2491|c0_g1_i5	20.74
TR24911|c0_g1_i4	19.89
TR2492|c0_g2_i2	29.1
TR24921|c0_g1_i1	16.48
TR24924|c1_g2_i1	26.96
TR24926|c0_g1_i1	13.62
TR24947|c0_g1_i1	54.49
TR24949|c0_g1_i1	19.72
TR24949|c0_g1_i2	12.98
TR24951|c0_g1_i2	13.77
TR24956|c0_g1_i1	19.6
TR24961|c0_g1_i1	12.95
TR24962|c0_g1_i1	69.55
TR24962|c0_g2_i1	50.13
TR24964|c0_g1_i2	12.09
TR24966|c0_g1_i1	18.61
TR24968|c1_g1_i1	134.48
TR24968|c1_g2_i2	54.38
TR24969|c0_g1_i1	20.59
TR2497|c0_g3_i1	1497.79
TR2497|c0_g3_i3	338.5
TR2497|c0_g3_i5	481.9
TR2497|c0_g3_i6	528.56
TR2497|c0_g4_i1	659.19
TR24979|c0_g1_i1	48.76
TR2498|c0_g1_i1	18.67
TR2498|c0_g2_i1	27.42
TR2498|c0_g2_i2	11.3
TR24980|c0_g1_i1	6.67
TR24981|c0_g1_i2	125.67
TR24982|c0_g1_i1	32.77
TR24987|c0_g1_i1	6.71
TR24988|c0_g1_i5	10.9
TR24988|c0_g1_i6	12.56
TR24989|c0_g1_i1	14.86
TR2499|c0_g1_i3	59.59
TR24994|c0_g1_i1	8.86
TR2500|c0_g1_i4	14.56
TR25002|c0_g2_i3	17.44
TR25003|c0_g1_i1	20.9
TR25017|c0_g1_i1	95.17
TR25017|c0_g1_i3	50.64
TR25018|c0_g1_i1	7.73
TR2502|c0_g1_i1	46.27
TR25020|c0_g1_i1	15.28
TR25021|c0_g1_i1	16.64
TR25024|c0_g1_i3	150.24
TR25024|c0_g1_i4	82.55
TR25026|c0_g2_i1	33.61
TR25031|c0_g1_i1	16.39
TR25033|c0_g1_i2	29.33
TR25034|c0_g1_i1	11.31
TR25034|c0_g1_i2	24.07
TR25039|c0_g1_i3	140.8
TR2504|c0_g1_i1	41.81
TR25043|c0_g1_i1	21.34
TR25043|c1_g1_i1	8.43
TR25050|c0_g1_i1	10.17
TR25054|c0_g2_i1	14.77
TR25056|c0_g1_i1	42.66
TR2506|c0_g2_i1	25.88
TR25060|c0_g1_i1	28.55
TR25061|c0_g1_i1	23.18
TR25065|c0_g2_i1	14.92
TR25068|c0_g1_i1	19.57
TR25068|c1_g1_i2	16.37
TR2507|c0_g4_i1	4.51
TR25083|c0_g1_i3	37.34
TR25088|c0_g1_i1	16.9
TR25092|c0_g1_i1	212.7
TR25092|c0_g2_i1	16.6
TR25093|c1_g3_i1	97.85
TR25098|c0_g1_i1	9.13
TR2510|c0_g2_i4	24.22
TR2510|c0_g3_i1	12.25
TR25102|c1_g1_i1	7.7
TR25109|c0_g1_i1	7.7
TR25109|c0_g3_i1	17.67
TR25110|c1_g1_i1	38.99
TR25115|c0_g1_i2	17.65
TR25115|c0_g1_i4	7.84
TR2512|c1_g1_i1	6.72
TR25121|c0_g1_i1	88.93
TR25123|c0_g1_i1	21.07
TR25128|c0_g2_i3	10.94
TR25128|c0_g2_i4	15.04
TR2513|c1_g1_i1	37.1
TR2513|c1_g2_i1	22.4
TR25134|c0_g1_i1	19.54
TR2514|c1_g10_i1	19.42
TR2514|c1_g10_i4	13.6
TR2514|c1_g10_i5	15.04
TR2514|c1_g10_i6	34.19
TR2514|c1_g4_i1	28.5
TR2514|c1_g4_i2	23.27
TR2514|c1_g4_i3	13.34
TR2514|c1_g5_i1	74.04
TR2514|c1_g9_i1	6.13
TR2514|c1_g9_i2	18.94
TR2514|c1_g9_i3	41.75
TR25142|c0_g1_i1	45.7
TR25142|c0_g1_i4	53.44
TR25153|c0_g1_i1	22.01
TR25156|c0_g1_i1	139.41
TR2516|c0_g1_i3	22.13
TR25160|c0_g1_i4	11.86
TR25163|c0_g1_i1	74.49
TR2519|c0_g1_i1	21.92
TR25191|c0_g1_i1	13.6
TR25193|c0_g1_i1	9.04
TR25193|c0_g1_i3	15.51
TR25197|c0_g1_i1	28.63
TR25198|c0_g1_i1	30.89
TR25200|c0_g2_i1	31.69
TR25205|c0_g1_i1	19.49
TR25208|c0_g1_i2	12.87
TR2521|c0_g10_i2	28.39
TR2521|c0_g2_i1	39.54
TR2521|c0_g3_i2	84.78
TR2521|c0_g3_i3	109.25
TR2521|c0_g3_i5	76.15
TR2521|c0_g4_i2	16.9
TR25211|c0_g1_i1	25.14
TR25211|c0_g1_i2	35.26
TR25213|c0_g1_i1	14.96
TR25214|c0_g1_i4	5.4
TR25216|c0_g1_i1	27.03
TR25216|c0_g2_i2	68.93
TR25218|c0_g1_i2	49.86
TR25222|c0_g1_i1	16.18
TR2523|c0_g1_i2	48.35
TR2523|c0_g1_i8	59.77
TR2523|c0_g3_i2	140.63
TR25232|c0_g1_i1	45.36
TR25236|c0_g1_i2	21.96
TR25240|c0_g1_i1	16.79
TR25247|c0_g1_i2	6.56
TR25249|c0_g1_i1	175.18
TR25249|c0_g6_i1	466.07
TR2525|c0_g1_i1	5.7
TR2526|c0_g2_i3	26.82
TR25263|c0_g1_i4	152.48
TR25268|c0_g1_i1	52.02
TR25269|c0_g1_i1	9.59
TR25270|c0_g1_i1	25.04
TR25272|c0_g1_i1	156.52
TR25272|c0_g3_i1	12.54
TR25279|c0_g1_i1	29.47
TR2528|c3_g1_i3	5.31
TR25281|c0_g1_i1	9.39
TR25285|c0_g1_i1	12.62
TR25291|c0_g1_i1	8.36
TR25292|c0_g1_i4	11.65
TR25294|c0_g1_i1	40.7
TR25295|c0_g2_i1	6.06
TR2530|c0_g1_i1	10.48
TR2530|c1_g4_i1	7.57
TR2530|c1_g4_i2	7.6
TR2530|c1_g4_i3	14.07
TR25304|c0_g1_i1	15.91
TR25304|c1_g1_i1	47.25
TR25306|c1_g1_i1	334.75
TR25306|c1_g1_i2	139.75
TR25310|c0_g1_i1	7.89
TR25311|c0_g1_i2	16.46
TR25313|c0_g1_i1	227.62
TR2532|c0_g4_i1	28.03
TR2532|c0_g4_i2	25.08
TR25320|c0_g1_i1	8.7
TR25321|c0_g1_i2	35.03
TR25322|c0_g1_i1	32.88
TR25323|c0_g1_i1	47.95
TR25324|c0_g1_i1	37.89
TR25328|c0_g1_i2	33.35
TR25329|c0_g1_i2	13.3
TR25329|c0_g1_i3	11.14
TR25334|c0_g1_i3	25.55
TR25338|c0_g1_i1	6.05
TR2534|c0_g3_i1	8.01
TR2534|c0_g3_i2	9.35
TR2534|c0_g4_i1	14.38
TR2534|c0_g4_i3	9.8
TR25356|c0_g2_i3	14.27
TR25357|c0_g1_i3	10.68
TR25358|c0_g1_i5	12.65
TR2536|c0_g1_i2	14.06
TR25364|c0_g1_i1	12.72
TR25369|c0_g1_i1	9.07
TR2537|c1_g1_i1	26.86
TR25373|c1_g2_i1	21.48
TR25373|c1_g2_i3	15.38
TR25374|c0_g1_i2	21.81
TR25377|c0_g1_i1	7.13
TR25379|c0_g2_i1	33.64
TR25381|c0_g1_i2	23.24
TR25383|c0_g1_i3	8.98
TR25383|c0_g1_i4	67.32
TR25384|c0_g1_i2	16.66
TR2540|c1_g3_i1	30.9
TR2540|c2_g1_i1	16.53
TR2541|c0_g2_i2	10.15
TR2542|c1_g3_i2	126.46
TR2543|c1_g1_i11	1.22
TR2543|c1_g1_i12	9.03
TR2543|c1_g1_i14	9.39
TR2543|c1_g1_i3	0
TR2543|c1_g1_i4	3.97
TR2544|c0_g1_i10	12.37
TR2544|c0_g1_i2	18.68
TR2544|c0_g1_i6	18.19
TR2544|c0_g5_i1	9.08
TR2545|c0_g1_i1	60.55
TR2545|c0_g2_i1	77.39
TR2545|c0_g2_i2	97.09
TR2545|c0_g2_i4	39.7
TR2545|c1_g1_i1	100.5
TR2545|c1_g2_i1	89.95
TR2545|c1_g4_i1	45.31
TR2545|c1_g4_i2	57.04
TR2546|c0_g2_i1	5.7
TR2546|c0_g3_i1	7.45
TR2546|c0_g3_i2	8.7
TR2547|c0_g1_i1	316
TR2548|c0_g2_i1	24.84
TR2548|c0_g3_i2	49.71
TR2548|c0_g4_i1	81.99
TR25484|c0_g1_i2	39.45
TR25489|c0_g1_i1	10.14
TR2549|c0_g1_i1	107.63
TR2549|c0_g2_i1	85.08
TR25502|c0_g3_i1	38.4
TR25502|c0_g3_i2	194.37
TR25506|c2_g1_i1	77.59
TR25506|c2_g3_i1	114.81
TR2551|c0_g1_i4	47.43
TR25510|c1_g1_i2	5.88
TR25512|c0_g1_i2	20.37
TR25514|c0_g1_i1	53.6
TR25514|c0_g1_i2	56.07
TR25514|c0_g2_i1	36.06
TR25517|c0_g1_i3	20.07
TR25519|c0_g2_i2	7.34
TR25520|c0_g1_i2	5.46
TR25521|c0_g1_i1	220.31
TR25522|c0_g1_i1	13.66
TR25525|c1_g2_i1	92.78
TR25531|c0_g1_i2	15.39
TR25533|c0_g1_i1	22.65
TR25536|c0_g1_i1	18.86
TR25537|c0_g1_i1	10.49
TR2554|c0_g1_i3	6.17
TR25544|c1_g1_i1	18.15
TR25545|c0_g1_i2	11.48
TR25551|c0_g1_i1	20.71
TR25553|c0_g1_i1	16.49
TR25554|c0_g1_i1	33.97
TR25557|c0_g1_i1	10.66
TR25557|c0_g1_i2	25.17
TR25559|c0_g1_i1	18.4
TR2556|c1_g1_i1	8.21
TR2556|c1_g2_i1	18.58
TR25564|c0_g1_i1	7.21
TR25568|c0_g1_i1	14.09
TR25569|c0_g3_i1	37.82
TR25571|c0_g1_i1	12.79
TR25573|c1_g1_i2	13.91
TR25573|c1_g1_i4	43.2
TR25575|c0_g1_i1	315.6
TR25577|c0_g1_i1	11.08
TR25578|c0_g2_i1	927.53
TR25586|c0_g1_i1	51.12
TR25586|c1_g1_i1	14.23
TR25589|c0_g1_i1	320.28
TR2559|c1_g1_i2	92.8
TR2559|c2_g1_i1	19.92
TR2559|c2_g2_i1	9.11
TR2559|c2_g6_i1	74.79
TR25597|c0_g1_i2	10.09
TR25598|c0_g2_i1	12.29
TR2560|c1_g1_i1	7.33
TR25604|c0_g1_i1	26.78
TR25605|c0_g1_i1	13.49
TR25605|c0_g1_i2	16.59
TR2561|c0_g1_i2	8.92
TR2561|c0_g1_i3	4.54
TR25613|c0_g1_i1	14.29
TR25614|c0_g1_i1	12.7
TR25616|c0_g1_i2	13.37
TR25617|c0_g1_i1	43.64
TR25617|c0_g2_i1	7.84
TR25629|c0_g2_i1	16.66
TR25629|c0_g2_i2	11.71
TR2563|c0_g1_i1	36.76
TR2563|c0_g2_i1	56.46
TR2563|c0_g4_i1	30.36
TR2563|c0_g5_i1	107.97
TR2563|c0_g6_i1	39.64
TR2563|c0_g7_i2	69.75
TR25633|c0_g1_i1	52.93
TR25636|c0_g1_i10	12.09
TR25636|c0_g1_i4	14.01
TR2564|c0_g1_i1	37.5
TR2564|c0_g1_i4	5.16
TR2564|c0_g1_i5	44.36
TR25647|c1_g1_i1	58.35
TR25647|c1_g1_i2	5.59
TR2565|c0_g1_i1	31.06
TR2565|c0_g2_i1	6.87
TR25658|c0_g1_i1	12.34
TR25658|c0_g1_i2	31.24
TR25658|c0_g2_i1	11.56
TR25659|c0_g1_i1	214.13
TR25659|c0_g5_i1	135.86
TR2566|c0_g1_i3	10.66
TR25662|c0_g1_i1	6.23
TR25670|c0_g1_i1	210.26
TR25672|c1_g3_i1	16.59
TR25676|c0_g2_i1	18.69
TR2568|c0_g1_i1	40.59
TR25681|c0_g1_i2	47.53
TR25692|c0_g1_i1	46.05
TR25693|c0_g1_i1	12.91
TR25693|c0_g2_i1	32.1
TR25693|c0_g2_i2	26.52
TR25696|c0_g1_i2	10.71
TR2570|c0_g1_i14	2.2
TR25701|c4_g3_i1	38.06
TR25702|c0_g1_i1	28.14
TR25704|c0_g1_i1	206.48
TR2571|c0_g1_i3	47.14
TR2571|c0_g1_i5	96.55
TR25715|c0_g1_i1	2.14
TR25715|c0_g1_i2	13.38
TR2572|c1_g2_i4	4.71
TR2572|c1_g2_i5	6.01
TR2572|c1_g3_i2	14.84
TR25722|c1_g1_i3	13.16
TR25723|c0_g1_i1	16.61
TR25726|c0_g1_i1	10.16
TR25730|c0_g1_i2	7.15
TR25732|c0_g1_i1	11.72
TR25736|c0_g1_i1	18.07
TR25736|c1_g1_i1	12.02
TR25741|c0_g1_i3	20.12
TR25746|c0_g1_i1	84.11
TR25746|c0_g1_i3	12.99
TR25747|c0_g3_i2	19.52
TR2575|c0_g3_i1	67.87
TR2575|c0_g3_i2	38.37
TR2575|c0_g6_i1	61.22
TR25753|c0_g2_i1	11.67
TR25756|c0_g1_i1	6.14
TR25762|c0_g1_i2	6.46
TR25766|c0_g1_i1	22.3
TR2577|c0_g2_i1	111.07
TR2577|c0_g2_i3	49.42
TR25779|c0_g1_i1	7.77
TR25779|c0_g1_i2	3.74
TR25782|c0_g1_i2	8.45
TR25782|c0_g1_i3	12.15
TR25787|c1_g1_i1	6.3
TR25789|c0_g1_i1	34.45
TR25790|c0_g1_i1	17.12
TR25791|c0_g1_i3	9.13
[truncated: 74,564 more rows]
